# Supplementary material
Source: PubMed Central journal article supplement (PMC4311773)
Supplement: NIHMS647234-supplement-Supplementary_Material.pdf [file NIHMS647234-supplement-Supplementary_Material.pdf]

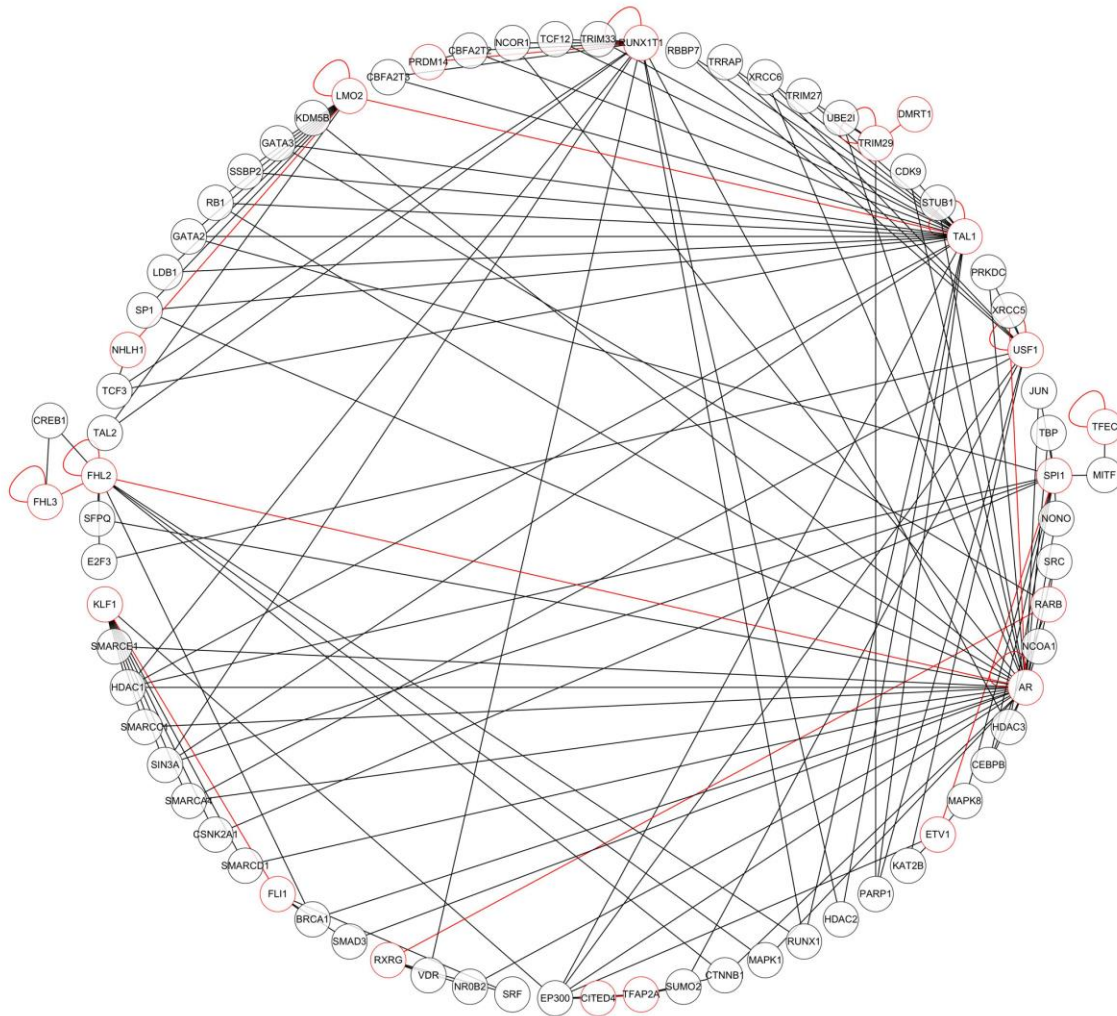

**Supplementary Figure 1. Network interactions amongst 75 genes that are differentially expressed between the proximal and distal ends of the E6.5 chicken cochlea provide evidence of a complex set of regulatory interactions.**

Red nodes depict 23 of the 112 differentially expressed transcription factors. Interactions were extracted from g:Profiler and were visualized in Cytoscape. Literature supported interactions are shown by lines with the red lines linking pairs of differentially expressed TF genes, which are known to interact.

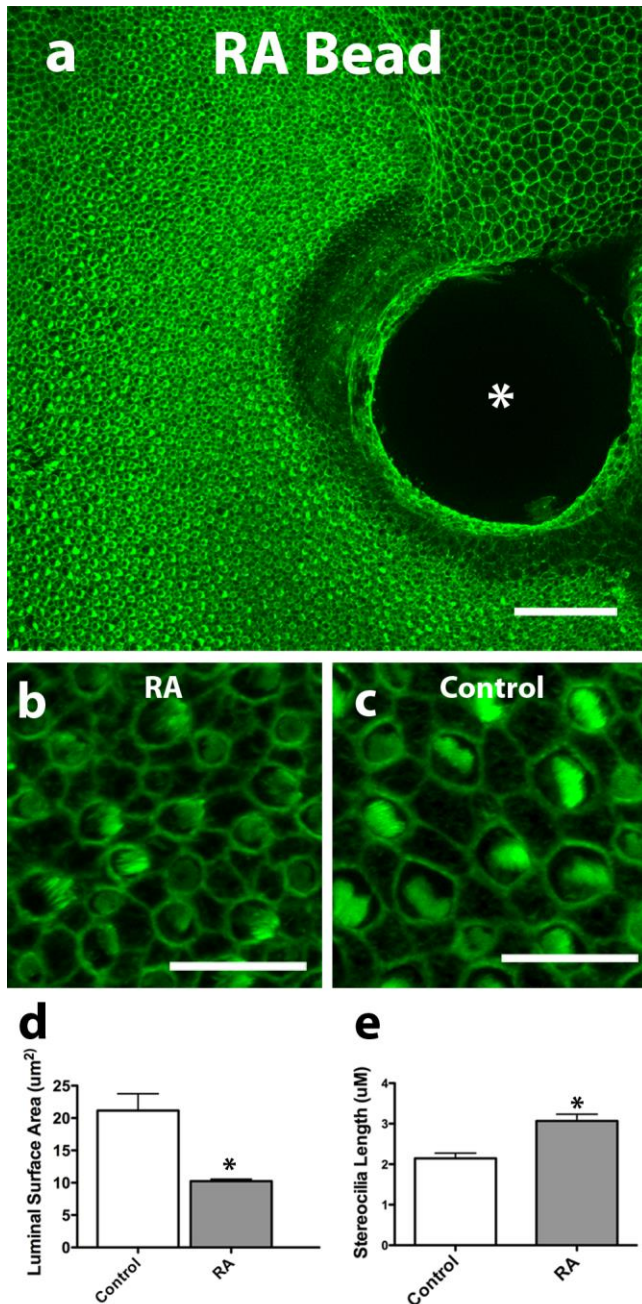

**Supplementary Figure 2. Local application of RA is sufficient to induce HCs in the proximal region of developing cochleae to develop distal-like phenotypes.**

(a) E6.5 BPs were implanted proximally with beads soaked in RA or vehicle-control then maintained in culture for 6 days. Shown is a low magnification micrograph of the proximal region of a cochlea implanted with an RA-soaked bead. The bead is marked with an (\*). BP is labeled with Alexa Fluor 488-phalloidin. (b,c) Representative high magnification micrographs of hair cells that formed in the proximal region of BPs implanted with RA-soaked (b) or vehicle-

control beads (c). (d) Quantification of the HC luminal surface area that formed within 100  $\mu\text{m}$  of the bead. Proximal HCs from BPs implanted with RA-soaked beads developed smaller luminal surface areas compared to BPs implanted with vehicle-control beads. ( $p = 0.0013$ ; Student's  $t$ -test;  $n_{\text{BPs}} = 6$ ). (e) Quantification of the stereocilia lengths that formed within 100  $\mu\text{m}$  of the bead. Proximal HCs from BPs implanted with RA-soaked beads developed longer stereocilia compared to BPs implanted with vehicle-control beads. ( $p = 0.0015$ ; Student's  $t$ -test;  $n_{\text{BPs}} = 6$ ). Scale bars in a: 50  $\mu\text{m}$ ; b,c: 10  $\mu\text{m}$ .

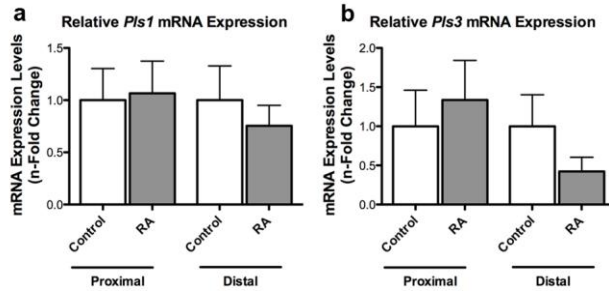

**Supplementary Figure 3. *Pls1* and *Pls3* mRNA expression levels after RA treatments.**

(a) Relative mRNA expression levels for *Pls1* in proximal and distal regions of E6.5 BPs cultured 3 days in control media or media supplemented with RA. Expression levels were normalized relative to the average mRNA expression in vehicle controls. We detected no differences in *Pls1* expression with RA treatments compared to controls in the proximal region ( $p = 0.885$ ; Student's *t*-test;  $n = 6$ ) or in the distal region ( $p = 0.5205$ , Student's *t*-test;  $n = 6$ ). (b) Relative mRNA expression levels for *Pls3* in proximal and distal regions of E6.5 BPs cultured 3 days in control media or media supplemented with RA. Expression levels were normalized relative to the average mRNA expression in vehicle controls. We detected no differences in *Pls3* expression with RA treatments compared to controls in the proximal region ( $p = 0.6497$ , Student's *t*-test;  $n = 3$ ) or in the distal region ( $p = 0.1812$ ; Student's *t*-test;  $n = 5$ ). Graphs show mean mRNA expression levels (n-Fold change)  $\pm$  S.E.M.

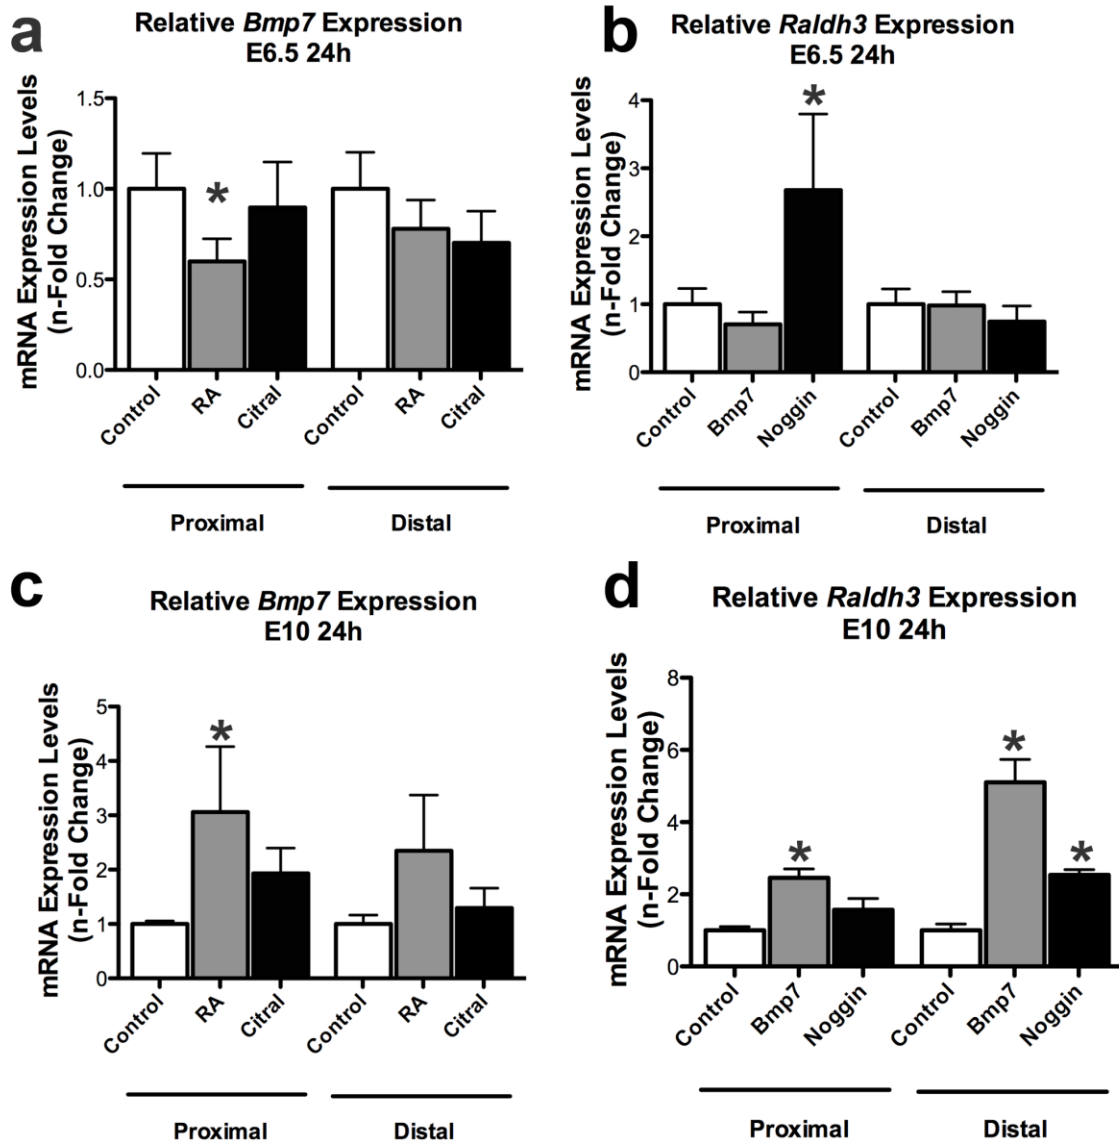

**Supplementary Figure 4. Reciprocal inhibitory feedback loops between *Bmp7* and Retinoic Acid signaling.**

(a) Relative *Bmp7* expression levels in proximal and distal regions of E6.5 BPs treated with RA or citral for 24 h. Expression levels were normalized relative to the average mRNA expression levels in vehicle controls. *Bmp7* was significantly downregulated in the distal region of BPs after 24 h RA-treatments ( $p < 0.05$ ; ANOVA with Newman-Keuls Post-test,  $n = 10$ ). (b) Relative *Raldh3* expression levels in proximal and distal regions of E6.5 BPs treated with Bmp7 or noggin for 24h. Expression levels were normalized relative to the average mRNA expression levels in controls. *Raldh3* expression was significantly elevated in the proximal region after 24 h noggin treatments ( $p < 0.05$ ; ANOVA with Newman-Keuls Post-test,  $n = 4$ ). (c) Relative *Bmp7* expression levels in E10 BPs treated with RA or citral for 24 h. Expression levels were normalized to controls. *Bmp7*

expression was elevated in the proximal region of BPs treated with RA ( $p < 0.05$ ; ANOVA with Newman-Keuls Post-test,  $n = 5$ ). While *Bmp7* mRNA expression levels appeared to be more elevated in the distal region of RA-treated BPs compared to controls, we did not detect any statistical differences ( $p > 0.05$ ; ANOVA with Newman-Keuls Post-test,  $n = 5$ ). (d) Relative *Raldh3* expression levels in E10 BPs treated with Bmp7 or noggin for 24 h. Expression levels were normalized to controls. *Raldh3* expression was elevated in both the proximal and distal regions of BPs treated with Bmp7 ( $p < 0.05$ ; ANOVA with Newman-Keuls Post-test,  $n = 7$ ) and its expression was elevated in the distal region of BPs treated with noggin ( $p < 0.05$ ; ANOVA with Newman-Keuls Post-test,  $n = 7$ ).

**Supplementary Table 1.** Top 10 upstream regulators derived from IPA analysis comparing the differentially expressed genes between the E6.5 proximal and distal ends of the BP, arranged by absolute activation z-score.

| Upstream Regulator | Molecule Type                   | Predicted Activation | Absolute Activation z-score | p-value of overlap |
|--------------------|---------------------------------|----------------------|-----------------------------|--------------------|
| tretinoin          | chemical - endogenous mammalian | Activated            | 5.546                       | 9.40E-08           |
| trichostatin A     | chemical drug                   | Activated            | 4.490                       | 1.96E-05           |
| hydrogen peroxide  | chemical - endogenous mammalian | Activated            | 4.405                       | 2.57E-02           |
| TP53               | transcription regulator         | Activated            | 4.355                       | 5.28E-02           |
| decitabine         | chemical drug                   | Activated            | 4.202                       | 1.45E-04           |
| LY294002           | chemical - kinase inhibitor     | Inhibited            | 4.149                       | 3.19E-06           |
| Vegf               | group                           | Activated            | 4.107                       | 4.64E-07           |
| MITF               | transcription regulator         | Activated            | 4.022                       | 7.30E-04           |
| U0126              | chemical - kinase inhibitor     | Inhibited            | 3.971                       | 4.31E-03           |
| F2                 | peptidase                       | Activated            | 3.832                       | 1.55E-04           |

| Transcript_id | Gene description                     | Gene symbol  | p-value(Attribu | Distal  |
|---------------|--------------------------------------|--------------|-----------------|---------|
| ENSGALT0000   | 5.8S ribosomal RNA                   | 5_8S_rRNA    | 0.492539        | 1018.26 |
| ENSGALT0000   | 5S ribosomal RNA                     | 5S_rRNA      | 0.509348        | 876.001 |
| ENSGALT0000   | 7SK RNA                              | 7SK          | 0.52526         | 293.5   |
| ENSGALT0000   | Uncharacterized protein              | A0FK60_CHICK | 0.638544        | 171     |
| ENSGALT0000   | KaisoUncharacterized protein         | A0MPA7_CHICK | 0.975479        | 1178    |
| ENSGALT0000   | APOBEC1 complementation factor       | A1CF         | ?               | 0       |
| ENSGALT0000   | AIG2-like domain 1                   | A2LD1        | 0.902984        | 124     |
| ENSGALT0000   | alpha-2-macroglobulin                | A2M          | 0.897458        | 523.5   |
| ENSGALT0000   | alpha-2-macroglobulin-like 1         | A2ML1        | 0.991941        | 430     |
| ENSGALT0000   | alpha 1,4-galactosyltransferase      | A4GALT       | 0.762574        | 17.5    |
| ENSGALT0000   | alpha-1,4-N-acetylglucosaminyltr     | A4GNT        | 0.828826        | 2.5     |
| ENSGALT0000   | Uncharacterized protein              | A4PET4_CHICK | 0.998796        | 73.5    |
| ENSGALT0000   | Uncharacterized protein              | A4VAR9_CHICK | 0.951602        | 400     |
| ENSGALT0000   | Uncharacterized protein              | A7UH64_CHICK | 0.176563        | 249     |
| ENSGALT0000   | achalasia, adrenocortical insuffici  | AAAS         | 0.859217        | 3208.5  |
| ENSGALT0000   | acetoacetyl-CoA synthetase           | AACS         | 0.741346        | 888.999 |
| ENSGALT0000   | arylacetamide deacetylase-like 2     | AADACL2      | 0.913675        | 39      |
| ENSGALT0000   | arylacetamide deacetylase-like 4-lil | AADACL3      | 0.978396        | 24.5    |
| ENSGALT0000   | arylacetamide deacetylase-like 4     | AADACL4      | 0.78451         | 38.6742 |
| ENSGALT0000   | aminoadipate aminotransferase        | AADAT        | 0.93671         | 312.5   |
| ENSGALT0000   | alpha- and gamma-adaptin binding     | AAGAB        | 0.929654        | 2015.5  |
| ENSGALT0000   | AP2 associated kinase 1              | AAK1         | 0.962105        | 1297.5  |
| ENSGALT0000   | angio-associated, migratory cell pr  | AAMP         | 0.763469        | 2126.28 |
| ENSGALT0000   | aralkylamine N-acetyltransferase     | AANAT        | 0.708776        | 99.5    |
| ENSGALT0000   | alanyl-tRNA synthetase               | AARS         | 0.829741        | 7330.5  |
| ENSGALT0000   | alanyl-tRNA synthetase 2, mitochor   | AARS2        | 0.907976        | 1284    |
| ENSGALT0000   | alanyl-tRNA synthetase domain cor    | AARSD1       | 0.790904        | 1583.5  |
| ENSGALT0000   | aminoadipate-semialdehyde dehyd      | AASDH        | 0.99803         | 555     |
| ENSGALT0000   | aminoadipate-semialdehyde dehyd      | AASDHPPT     | 0.904122        | 162     |
| ENSGALT0000   | aminoadipate-semialdehyde synth      | AASS         | 0.982014        | 867.5   |
| ENSGALT0000   | apoptosis antagonizing transcriptio  | AATF         | 0.922317        | 920.496 |
| ENSGALT0000   | apoptosis-associated tyrosine kin    | AATK         | 0.918929        | 342     |
| ENSGALT0000   | 4-aminobutyrate aminotransferase     | ABAT         | 0.923433        | 523     |
| ENSGALT0000   | ATP-binding cassette, sub-family A   | ABCA1        | 0.934437        | 684.506 |
| ENSGALT0000   | ATP-binding cassette, sub-family A   | ABCA12       | 0.510672        | 62.5    |
| ENSGALT0000   | ATP-binding cassette, sub-family A   | ABCA3        | 0.919224        | 6767    |
| ENSGALT0000   | ATP-binding cassette, sub-family A   | ABCA4        | 0.971111        | 251     |
| ENSGALT0000   | ATP-binding cassette, sub-family A   | ABCA5        | 0.959238        | 1802    |
| ENSGALT0000   | ATP-binding cassette, sub-family A   | ABCA7        | 0.938999        | 411.5   |
| ENSGALT0000   | ATP-binding cassette, sub-family A   | ABCA8        | 0.680696        | 40      |
| ENSGALT0000   | ATP-binding cassette, sub-family B   | ABCB1        | 0.758549        | 40.5    |
| ENSGALT0000   | ATP-binding cassette, sub-family B   | ABCB10       | 0.994197        | 570     |
| ENSGALT0000   | ATP-binding cassette, sub-family B   | ABCB6        | 0.911869        | 346     |
| ENSGALT0000   | ATP-binding cassette, sub-family B   | ABCB7        | 0.9706          | 611     |
| ENSGALT0000   | ATP-binding cassette, sub-family B   | ABCB9        | 0.812168        | 157.5   |
| ENSGALT0000   | ATP-binding cassette, sub-family C   | ABCC10       | 0.998891        | 1716    |
| ENSGALT0000   | ATP-binding cassette, sub-family C   | ABCC2        | 0.964731        | 49.5    |
| ENSGALT0000   | ATP-binding cassette, sub-family C   | ABCC3        | 0.969937        | 598.5   |
| ENSGALT0000   | ATP-binding cassette, sub-family C   | ABCC4        | 0.981273        | 116.5   |
| ENSGALT0000   | ATP-binding cassette, sub-family C   | ABCC5        | 0.988304        | 2587.49 |
| ENSGALT0000   | ATP-binding cassette, sub-family C   | ABCC6        | 0.996486        | 282.499 |
| ENSGALT0000   | ATP-binding cassette, sub-family C   | ABCC8        | 0.97315         | 1755.5  |
| ENSGALT0000   | ATP-binding cassette, sub-family D   | ABCD2        | 0.947855        | 451.999 |
| ENSGALT0000   | ATP-binding cassette, sub-family D   | ABCD3        | 0.956681        | 2236    |
| ENSGALT0000   | ATP-binding cassette, sub-family D   | ABCD4        | 0.960742        | 609     |



|                                                                                       |          |         |
|---------------------------------------------------------------------------------------|----------|---------|
| ENSGALT0000 ATP-binding cassette, sub-family E ABCE1                                  | 0.957195 | 3471.51 |
| ENSGALT0000 ATP-binding cassette, sub-family F ABCF2                                  | 0.914471 | 2820    |
| ENSGALT0000 ATP-binding cassette, sub-family F ABCF3                                  | 0.832964 | 3314.5  |
| ENSGALT0000 ATP-binding cassette, sub-family G ABCG1                                  | 0.972999 | 167     |
| ENSGALT0000 ATP-binding cassette, sub-family G ABCG2                                  | 0.787    | 162.5   |
| ENSGALT0000 ATP-binding cassette, sub-family G ABCG4                                  | 0.798657 | 345.5   |
| ENSGALT0000 ATP-binding cassette, sub-family G ABCG5                                  | 0.938289 | 23.5    |
| ENSGALT0000 ATP-binding cassette, sub-family G ABCG8                                  | 0.649519 | 1       |
| ENSGALT0000 abhydrolase domain containing 10 ABHD10                                   | 0.913968 | 209.5   |
| ENSGALT0000 abhydrolase domain containing 11 ABHD11                                   | 0.816181 | 190     |
| ENSGALT0000 abhydrolase domain containing 12 ABHD12                                   | 0.96405  | 3075.5  |
| ENSGALT0000 abhydrolase domain containing 12L ABHD12B                                 | 0.387322 | 1243.5  |
| ENSGALT0000 abhydrolase domain containing 13 ABHD13                                   | 0.993204 | 692     |
| ENSGALT0000 abhydrolase domain containing 2 ABHD2                                     | 0.938267 | 431     |
| ENSGALT0000 abhydrolase domain containing 3 ABHD3                                     | 0.587473 | 242.5   |
| ENSGALT0000 abhydrolase domain containing 5 ABHD5                                     | 0.989868 | 245.5   |
| ENSGALT0000 abhydrolase domain containing 6 ABHD6                                     | 0.90073  | 375     |
| ENSGALT0000 abl-interactor 1 ABI1                                                     | 0.943556 | 2200.47 |
| ENSGALT0000 abl-interactor 2 ABI2                                                     | 0.937837 | 1387    |
| ENSGALT0000 ABI family, member 3 ABI3                                                 | 0.999448 | 47      |
| ENSGALT0000 ABI family, member 3 (NESH) binding protein 1 ABI3BP                      | 0.434648 | 563     |
| ENSGALT0000 c-abl oncogene 1, non-receptor tyrosine kinase ABL1                       | 0.972206 | 9129.46 |
| ENSGALT0000 v-abl Abelson murine leukemia virus protein ABL2                          | 0.970149 | 1059.5  |
| ENSGALT0000 actin binding LIM protein 1 ABLIM1                                        | 0.853428 | 803     |
| ENSGALT0000 actin binding LIM protein family, member 2 ABLIM2                         | 0.987125 | 466.5   |
| ENSGALT0000 actin binding LIM protein family, member 3 ABLIM3                         | 0.598426 | 86      |
| ENSGALT0000 active BCR-related gene ABR                                               | 0.889829 | 1081.01 |
| ENSGALT0000 actin-binding Rho activating protein ABRA                                 | 0.898356 | 0.5     |
| ENSGALT0000 ankyrin repeat and BTB (POZ) domain containing protein 1 ABTB1            | 0.979559 | 1694    |
| ENSGALT0000 Small nucleolar RNA ACA64 ACA64                                           | 0.977187 | 11      |
| ENSGALT0000 acetyl-CoA acyltransferase 1 ACAA1                                        | 0.8397   | 882     |
| ENSGALT0000 acetyl-CoA acyltransferase 2 ACAA2                                        | 0.906209 | 2260.5  |
| ENSGALT0000 acetyl-CoA carboxylase alpha ACACA                                        | 0.957148 | 4627.01 |
| ENSGALT0000 acyl-CoA dehydrogenase family, member 11 ACAD11                           | 0.928863 | 749.5   |
| ENSGALT0000 acyl-CoA dehydrogenase family, member 8 ACAD8                             | 0.760904 | 1003    |
| ENSGALT0000 acyl-CoA dehydrogenase family, member 9 ACAD9                             | 0.881046 | 2527.5  |
| ENSGALT0000 acyl-CoA dehydrogenase, long chain ACADL                                  | 0.850661 | 4026.55 |
| ENSGALT0000 acyl-CoA dehydrogenase, C-2 to C ACADS                                    | 0.965629 | 1911.5  |
| ENSGALT0000 acyl-CoA dehydrogenase, short/branched ACADSB                             | 0.984351 | 1100.13 |
| ENSGALT0000 aggrecan ACAN                                                             | 0.779204 | 557.999 |
| ENSGALT0000 ArfGAP with coiled-coil, ankyrin repeat domain containing protein 2 ACAP2 | 0.971947 | 1648.5  |
| ENSGALT0000 ArfGAP with coiled-coil, ankyrin repeat domain containing protein 3 ACAP3 | 0.703351 | 1848    |
| ENSGALT0000 acetyl-CoA acetyltransferase 1 ACAT1                                      | 0.763922 | 2633.5  |
| ENSGALT0000 acetyl-CoA acetyltransferase 2 ACAT2                                      | 0.545935 | 2081.18 |
| ENSGALT0000 acyl-CoA binding domain containing protein 3 ACBD3                        | 0.908938 | 1688    |
| ENSGALT0000 acyl-CoA binding domain containing protein 5 ACBD5                        | 0.928089 | 749.502 |
| ENSGALT0000 acyl-CoA binding domain containing protein 6 ACBD6                        | 0.491165 | 1109.47 |
| ENSGALT0000 acyl-CoA binding domain containing protein 7 ACBD7                        | 0.82715  | 162.5   |
| ENSGALT0000 amiloride-sensitive cation channel 1 ACCN1                                | 0.658124 | 209.5   |
| ENSGALT0000 amiloride-sensitive cation channel 2 ACCN2                                | 0.73754  | 1211.52 |
| ENSGALT0000 amiloride-sensitive cation channel 5 ACCN5                                | 0.818488 | 3       |
| ENSGALT0000 1-aminocyclopropane-1-carboxylate synthetase ACCS                         | 0.977314 | 393     |
| ENSGALT0000 adrenocortical dysplasia homolog (ACD) ACD                                | 0.957403 | 712.686 |
| ENSGALT0000 angiotensin I converting enzyme (pI 4.5) ACE                              | 0.99768  | 297.972 |
| ENSGALT0000 angiotensin I converting enzyme (pI 5.5) ACE2                             | 0.625832 | 6       |
| ENSGALT0000 alkaline ceramidase 1 ACER1                                               | 0.917835 | 8.5     |

|                                                       |        |          |         |
|-------------------------------------------------------|--------|----------|---------|
| ENSGALT0000 alkaline ceramidase 2                     | ACER2  | 0.749607 | 88      |
| ENSGALT0000 alkaline ceramidase 3                     | ACER3  | 0.988787 | 391.5   |
| ENSGALT0000 ATP citrate lyase                         | ACLY   | 0.883068 | 10024.6 |
| ENSGALT0000 aminocarboxymuconate semialdehy           | ACMSD  | 0.430207 | 8.5     |
| ENSGALT0000 ACN9 homolog (S. cerevisiae)              | ACN9   | 0.69555  | 267     |
| ENSGALT0000 aconitase 1, soluble                      | ACO1   | 0.914397 | 1484.01 |
| ENSGALT0000 aconitase 2, mitochondrial                | ACO2   | 0.85102  | 8073    |
| ENSGALT0000 acyl-CoA thioesterase 11                  | ACOT11 | 0.424778 | 208     |
| ENSGALT0000 acyl-CoA thioesterase 12                  | ACOT12 | 0.832568 | 110     |
| ENSGALT0000 acyl-CoA thioesterase 13                  | ACOT13 | 0.314144 | 293.5   |
| ENSGALT0000 acyl-CoA thioesterase 7                   | ACOT7  | 0.574594 | 1902.5  |
| ENSGALT0000 acyl-CoA thioesterase 8                   | ACOT8  | 0.618094 | 668     |
| ENSGALT0000 acyl-CoA thioesterase 9                   | ACOT9  | 0.936847 | 688.499 |
| ENSGALT0000 acyl-CoA oxidase 1, palmitoyl             | ACOX1  | 0.982675 | 1745.5  |
| ENSGALT0000 acyl-CoA oxidase 2, branched chain        | ACOX2  | 0.994358 | 430.5   |
| ENSGALT0000 acyl-CoA oxidase 3, pristanoyl            | ACOX3  | 0.931741 | 188.5   |
| ENSGALT0000 acid phosphatase 1, soluble               | ACP1   | 0.794053 | 889.5   |
| ENSGALT0000 acid phosphatase 2, lysosomal             | ACP2   | 0.99425  | 1024    |
| ENSGALT0000 acid phosphatase 6, lysophosphatidyl      | ACP6   | 0.913381 | 662.5   |
| ENSGALT0000 acid phosphatase-like 2                   | ACPL2  | 0.88441  | 642     |
| ENSGALT0000 acid phosphatase, prostate                | ACPP   | 0.924803 | 6.5     |
| ENSGALT0000 acrosin binding protein                   | ACRBP  | 0.464758 | 0       |
| ENSGALT0000 acidic repeat containing                  | ACRC   | 0.865249 | 231     |
| ENSGALT0000 acyl-CoA synthetase bubblegum family      | ACSBG1 | 0.961766 | 109     |
| ENSGALT0000 acyl-CoA synthetase bubblegum family      | ACSBG2 | 0.673284 | 654     |
| ENSGALT0000 acyl-CoA synthetase family member         | ACSF2  | 0.960569 | 1090.5  |
| ENSGALT0000 acyl-CoA synthetase family member         | ACSF3  | 0.958861 | 343     |
| ENSGALT0000 acyl-CoA synthetase long-chain fatty      | ACSL1  | 0.989492 | 1982    |
| ENSGALT0000 acyl-CoA synthetase long-chain fatty      | ACSL3  | 0.844811 | 1137.5  |
| ENSGALT0000 acyl-CoA synthetase long-chain fatty      | ACSL4  | 0.948991 | 3341.5  |
| ENSGALT0000 acyl-CoA synthetase long-chain fatty      | ACSL5  | 0.840715 | 7.5     |
| ENSGALT0000 acyl-CoA synthetase long-chain fatty      | ACSL6  | 0.806817 | 254.5   |
| ENSGALT0000 acyl-CoA synthetase medium-chain          | ACSM3  | 0.464758 | 0.5     |
| ENSGALT0000 acyl-CoA synthetase medium-chain          | ACSM4  | 0.866543 | 7.5     |
| ENSGALT0000 acyl-CoA synthetase medium-chain          | ACSM5  | 0.929713 | 14.5    |
| ENSGALT0000 acyl-CoA synthetase short-chain fatty     | ACSS1  | 0.99879  | 476.5   |
| ENSGALT0000 acyl-CoA synthetase short-chain fatty     | ACSS2  | 0.839587 | 1245.5  |
| ENSGALT0000 acyl-CoA synthetase short-chain fatty     | ACSS3  | 0.938856 | 184.5   |
| ENSGALT0000 actin, alpha 1, skeletal muscle           | ACTA1  | 0.764102 | 4271.33 |
| ENSGALT0000 actin, alpha 2, smooth muscle, aorta      | ACTA2  | 0.248302 | 165.014 |
| ENSGALT0000 actin, beta-like 2                        | ACTBL2 | 0.868245 | 1.5     |
| ENSGALT0000 actin, alpha, cardiac muscle 1            | ACTC1  | 0.432754 | 61.2788 |
| ENSGALT0000 actin, gamma 1                            | ACTG1  | 0.651272 | 29647.4 |
| ENSGALT0000 \N                                        | ACTG2  | 0.404938 | 5777.77 |
| ENSGALT0000 actin-like 9                              | ACTL9  | ?        | 0       |
| ENSGALT0000 actinin, alpha 1                          | ACTN1  | 0.953719 | 2663.44 |
| ENSGALT0000 actinin, alpha 2                          | ACTN2  | 0.982438 | 65      |
| ENSGALT0000 actinin, alpha 4                          | ACTN4  | 0.911395 | 3286.5  |
| ENSGALT0000 actin-related protein 10 homolog (SACTR10 |        | 0.849835 | 2638.03 |
| ENSGALT0000 ARP1 actin-related protein 1 homolog      | ACTR1A | 0.85779  | 6264.5  |
| ENSGALT0000 ARP2 actin-related protein 2 homolog      | ACTR2  | 0.924608 | 3686.49 |
| ENSGALT0000 ARP3 actin-related protein 3 homolog      | ACTR3  | 0.818588 | 3839    |
| ENSGALT0000 ARP3 actin-related protein 3 homolog      | ACTR3B | 0.899573 | 616.5   |
| ENSGALT0000 ARP5 actin-related protein 5 homolog      | ACTR5  | 0.951224 | 437.5   |
| ENSGALT0000 ARP6 actin-related protein 6 homolog      | ACTR6  | 0.640326 | 1909.01 |
| ENSGALT0000 ARP8 actin-related protein 8 homolog      | ACTR8  | 0.840608 | 1270.5  |

|                                                |          |          |         |
|------------------------------------------------|----------|----------|---------|
| ENSGALT0000 actin-related protein T2           | ACTRT2   | 0.464758 | 0       |
| ENSGALT0000 activin A receptor, type I         | ACVR1    | 0.931687 | 1277    |
| ENSGALT0000 activin A receptor, type IB        | ACVR1B   | 0.928254 | 2257.96 |
| ENSGALT0000 activin A receptor, type IC        | ACVR1C   | 0.975706 | 19.5    |
| ENSGALT0000 activin A receptor, type IIA       | ACVR2A   | 0.941615 | 2255.52 |
| ENSGALT0000 activin A receptor, type IIB       | ACVR2B   | 0.988995 | 1211.47 |
| ENSGALT0000 acylphosphatase 1, erythrocyte (co | ACYP1    | 0.149324 | 454.5   |
| ENSGALT0000 adenosine deaminase                | ADA      | 0.963593 | 149.5   |
| ENSGALT0000 adenosine deaminase domain cont    | ADAD1    | 0.771667 | 3.5     |
| ENSGALT0000 adenosine deaminase-like           | ADAL     | 0.979158 | 430.996 |
| ENSGALT0000 ADAM metallopeptidase domain 10    | ADAM10   | 0.996873 | 4836.2  |
| ENSGALT0000 ADAM metallopeptidase domain 11    | ADAM11   | 0.901516 | 77      |
| ENSGALT0000 ADAM metallopeptidase domain 12    | ADAM12   | 0.692099 | 203.5   |
| ENSGALT0000 ADAM metallopeptidase domain 15    | ADAM15   | 0.936964 | 19      |
| ENSGALT0000 ADAM metallopeptidase domain 17    | ADAM17   | 0.99084  | 3927.11 |
| ENSGALT0000 ADAM metallopeptidase domain 19    | ADAM19   | 0.560637 | 148.5   |
| ENSGALT0000 ADAM metallopeptidase domain 22    | ADAM22   | 0.913829 | 308     |
| ENSGALT0000 ADAM metallopeptidase domain 23    | ADAM23   | 0.964539 | 1468    |
| ENSGALT0000 ADAM metallopeptidase domain 28    | ADAM28   | 0.71103  | 18.5    |
| ENSGALT0000 ADAM metallopeptidase domain 33    | ADAM33   | 0.927817 | 263.5   |
| ENSGALT0000 ADAM metallopeptidase domain 8     | ADAM8    | 0.831639 | 9.5     |
| ENSGALT0000 ADAM metallopeptidase domain 9     | ADAM9    | 0.986831 | 2343.06 |
| ENSGALT0000 ADAM metallopeptidase with throm   | ADAMTS1  | 0.661014 | 12126.8 |
| ENSGALT0000 ADAM metallopeptidase with throm   | ADAMTS10 | 0.676291 | 303     |
| ENSGALT0000 ADAM metallopeptidase with throm   | ADAMTS12 | 0.980237 | 1057    |
| ENSGALT0000 ADAM metallopeptidase with throm   | ADAMTS14 | 0.983773 | 906.5   |
| ENSGALT0000 ADAM metallopeptidase with throm   | ADAMTS15 | 0.789098 | 358.5   |
| ENSGALT0000 ADAM metallopeptidase with throm   | ADAMTS17 | 0.903512 | 5237.5  |
| ENSGALT0000 ADAM metallopeptidase with throm   | ADAMTS18 | 0.932776 | 3677    |
| ENSGALT0000 ADAM metallopeptidase with throm   | ADAMTS19 | 0.957273 | 188.5   |
| ENSGALT0000 ADAM metallopeptidase with throm   | ADAMTS2  | 0.811827 | 84.5    |
| ENSGALT0000 ADAM metallopeptidase with throm   | ADAMTS20 | 0.938174 | 5058    |
| ENSGALT0000 ADAM metallopeptidase with throm   | ADAMTS3  | 0.969801 | 1978    |
| ENSGALT0000 ADAM metallopeptidase with throm   | ADAMTS5  | 0.962638 | 1412    |
| ENSGALT0000 ADAM metallopeptidase with throm   | ADAMTS6  | 0.98339  | 160.5   |
| ENSGALT0000 ADAM metallopeptidase with throm   | ADAMTS7  | 0.837336 | 1629.87 |
| ENSGALT0000 ADAM metallopeptidase with throm   | ADAMTS8  | 0.981861 | 249     |
| ENSGALT0000 ADAM metallopeptidase with throm   | ADAMTS9  | 0.764847 | 1432    |
| ENSGALT0000 ADAMTS-like 1                      | ADAMTSL1 | 0.978608 | 405.5   |
| ENSGALT0000 ADAMTS-like 3                      | ADAMTSL3 | 0.55964  | 851     |
| ENSGALT0000 ADAMTS-like 5                      | ADAMTSL5 | 0.467175 | 200     |
| ENSGALT0000 ArfGAP with dual PH domains 1      | ADAP1    | 0.877018 | 921.5   |
| ENSGALT0000 ArfGAP with dual PH domains 2      | ADAP2    | 0.637522 | 16.5    |
| ENSGALT0000 adenosine deaminase, RNA-specif    | ADAR     | 0.962294 | 2646    |
| ENSGALT0000 adenosine deaminase, RNA-specif    | ADARB1   | 0.952815 | 672.999 |
| ENSGALT0000 adenosine deaminase, RNA-specif    | ADARB2   | 0.932579 | 108.5   |
| ENSGALT0000 adenosine deaminase, tRNA-speci    | ADAT1    | 0.997473 | 690.5   |
| ENSGALT0000 adenosine deaminase, tRNA-speci    | ADAT2    | 0.161804 | 320.5   |
| ENSGALT0000 arginine decarboxylase             | ADC      | 0.819369 | 351     |
| ENSGALT0000 aarF domain containing kinase 1    | ADCK1    | 0.957732 | 236.5   |
| ENSGALT0000 aarF domain containing kinase 2    | ADCK2    | 0.975817 | 768.5   |
| ENSGALT0000 aarF domain containing kinase 3    | ADCK3    | 0.980216 | 3553    |
| ENSGALT0000 adenylyate cyclase 1 (brain)       | ADCY1    | 0.762003 | 10.5    |
| ENSGALT0000 adenylyate cyclase 2 (brain)       | ADCY2    | 0.67623  | 71      |
| ENSGALT0000 adenylyate cyclase 5               | ADCY5    | 0.986783 | 843.995 |
| ENSGALT0000 adenylyate cyclase 7               | ADCY7    | 0.768367 | 479     |

|                                                              |           |          |         |
|--------------------------------------------------------------|-----------|----------|---------|
| ENSGALT0000 adenylate cyclase 8 (brain)                      | ADCY8     | 0.905241 | 91      |
| ENSGALT0000 adenylate cyclase 9                              | ADCY9     | 0.976241 | 1929.79 |
| ENSGALT0000 adenylate cyclase activating polypeptide 1       | ADCYAP1   | 0.144086 | 45.5    |
| ENSGALT0000 adenylate cyclase activating polypeptide 1R1     | ADCYAP1R1 | 0.806053 | 56.5    |
| ENSGALT0000 adducin 1 (alpha)                                | ADD1      | 0.944806 | 7021.5  |
| ENSGALT0000 adducin 3 (gamma)                                | ADD3      | 0.980191 | 3454.47 |
| ENSGALT0000 alcohol dehydrogenase 1B (class I)               | ADH1B     | 0.581107 | 18.7088 |
| ENSGALT0000 alcohol dehydrogenase 5 (class III)              | ADH5      | 0.761884 | 8370.24 |
| ENSGALT0000 alcohol dehydrogenase, iron containing           | ADHFE1    | 0.999932 | 161     |
| ENSGALT0000 acireductone dioxygenase 1                       | ADI1      | 0.646729 | 293.501 |
| ENSGALT0000 adiponectin, C1Q and collagen domain containing  | ADIPOQ    | 0.798073 | 4.5     |
| ENSGALT0000 adiponectin receptor 1                           | ADIPOR1   | 0.797088 | 2502    |
| ENSGALT0000 adiponectin receptor 2                           | ADIPOR2   | 0.995784 | 1539.02 |
| ENSGALT0000 adenosine kinase                                 | ADK       | 0.754375 | 1035    |
| ENSGALT0000 adrenomedullin                                   | ADM       | 0.579629 | 21.5    |
| ENSGALT0000 activity-dependent neuroprotector 1              | ADNP      | 0.976714 | 4739.5  |
| ENSGALT0000 ADNP homeobox 2                                  | ADNP2     | 0.991779 | 844.5   |
| ENSGALT0000 adenosine A1 receptor                            | ADORA1    | 0.797989 | 20.5    |
| ENSGALT0000 adenosine A2a receptor                           | ADORA2A   | 0.887212 | 63      |
| ENSGALT0000 adenosine receptor 2b                            | ADORA2B   | 0.859602 | 94      |
| ENSGALT0000 adenosine A3 receptor                            | ADORA3    | 0.908452 | 17.5    |
| ENSGALT0000 ADP-dependent glucokinase                        | ADPGK     | 0.959885 | 1265.5  |
| ENSGALT0000 ADP-ribosylarginine hydrolase                    | ADPRH     | 0.953375 | 955.999 |
| ENSGALT0000 ADP-ribosylhydrolase like 1                      | ADPRHL1   | 0.349364 | 58.5    |
| ENSGALT0000 ADP-ribosylhydrolase like 2                      | ADPRHL2   | 0.955146 | 2052    |
| ENSGALT0000 adrenergic, alpha-1B-, receptor                  | ADRA1B    | 0.43418  | 0       |
| ENSGALT0000 adrenergic, alpha-2A-, receptor                  | ADRA2A    | 0.869674 | 197     |
| ENSGALT0000 adrenergic, alpha-2B-, receptor                  | ADRA2B    | 0.651631 | 6.5     |
| ENSGALT0000 adrenergic, beta-2-, receptor, surface           | ADRB2     | 0.963686 | 18.5    |
| ENSGALT0000 hypothetical protein LOC426000                   | ADRBK1    | 0.913621 | 774.5   |
| ENSGALT0000 adrenergic, beta, receptor kinase 2              | ADRBK2    | 0.980481 | 1148.5  |
| ENSGALT0000 adhesion regulating molecule 1                   | ADRM1     | 0.840592 | 2799.97 |
| ENSGALT0000 adenylosuccinate lyase                           | ADSL      | 0.731988 | 2460.41 |
| ENSGALT0000 adenylosuccinate synthase                        | ADSS      | 0.948855 | 1712    |
| ENSGALT0000 adenylosuccinate synthase like 1                 | ADSSL1    | 0.941325 | 118     |
| ENSGALT0000 AE binding protein 2                             | AEBP2     | 0.992851 | 331     |
| ENSGALT0000 apoptosis enhancing nuclease                     | AEN       | 0.826449 | 222.5   |
| ENSGALT0000 actin filament associated protein 1              | AFAP1     | 0.794182 | 2732.51 |
| ENSGALT0000 actin filament associated protein 1-like 1       | AFAP1L1   | 0.944853 | 921.51  |
| ENSGALT0000 actin filament associated protein 1-like 2       | AFAP1L2   | 0.67784  | 346     |
| ENSGALT0000 AF4/FMR2 family, member 1                        | AFF1      | 0.974938 | 1624    |
| ENSGALT0000 AF4/FMR2 family, member 4                        | AFF4      | 0.981864 | 1165.5  |
| ENSGALT0000 AFG3 ATPase family gene 3-like 2                 | AFG3L2    | 0.957406 | 1538.96 |
| ENSGALT0000 arylformamidase                                  | AFMID     | 0.948193 | 678     |
| ENSGALT0000 aftiphilin                                       | AFTPH     | 0.991237 | 984.003 |
| ENSGALT0000 aspartylglucosaminidase                          | AGA       | 0.92457  | 1387.5  |
| ENSGALT0000 ArfGAP with GTPase domain, ankyrin repeat domain | AGAP1     | 0.949648 | 996     |
| ENSGALT0000 ArfGAP with GTPase domain, ankyrin repeat domain | AGAP3     | 0.85451  | 1860.5  |
| ENSGALT0000 ATP/GTP binding protein-like 1                   | AGBL1     | 0.735681 | 112     |
| ENSGALT0000 ATP/GTP binding protein-like 2                   | AGBL2     | 0.9761   | 28.5    |
| ENSGALT0000 ATP/GTP binding protein-like 3                   | AGBL3     | 0.457758 | 1.5     |
| ENSGALT0000 ATP/GTP binding protein-like 4                   | AGBL4     | 0.816619 | 44.5    |
| ENSGALT0000 ATP/GTP binding protein-like 5                   | AGBL5     | 0.863902 | 822     |
| ENSGALT0000 ArfGAP with FG repeats 1                         | AGFG1     | 0.903861 | 1668.5  |
| ENSGALT0000 angiogenic factor with G patch and GAG repeats   | AGGF1     | 0.990934 | 473     |
| ENSGALT0000 acylglycerol kinase                              | AGK       | 0.84654  | 805.5   |

|                                                                  |         |          |         |
|------------------------------------------------------------------|---------|----------|---------|
| ENSGALT0000 amylo-alpha-1, 6-glucosidase, 4-aldolase             | AGL     | 0.980394 | 1018.5  |
| ENSGALT0000 agmatine ureohydrolase (agmatina)                    | AGMAT   | 0.961876 | 38.4863 |
| ENSGALT0000 alkylglycerol monooxygenase                          | AGMO    | 0.564513 | 0.5     |
| ENSGALT0000 1-acylglycerol-3-phosphate O-acyltransferase 2       | AGPAT2  | 0.884216 | 143.5   |
| ENSGALT0000 1-acylglycerol-3-phosphate O-acyltransferase 3       | AGPAT3  | 0.991923 | 1201.37 |
| ENSGALT0000 1-acylglycerol-3-phosphate O-acyltransferase 4       | AGPAT4  | 0.937909 | 366.5   |
| ENSGALT0000 1-acylglycerol-3-phosphate O-acyltransferase 5       | AGPAT5  | 0.956835 | 540     |
| ENSGALT0000 1-acylglycerol-3-phosphate O-acyltransferase 6       | AGPAT6  | 0.959711 | 1621.5  |
| ENSGALT0000 1-acylglycerol-3-phosphate O-acyltransferase 9       | AGPAT9  | 0.944382 | 717.5   |
| ENSGALT0000 aminoglycoside phosphotransferase                    | AGPHD1  | 0.625072 | 232.5   |
| ENSGALT0000 alkylglycerone phosphate synthase                    | AGPS    | 0.946604 | 987.5   |
| ENSGALT0000 anterior gradient homolog 2 (Xenopus)                | AGR2    | 0.839789 | 214.5   |
| ENSGALT0000 anterior gradient homolog 3 (Xenopus)                | AGR3    | 0.935093 | 11366   |
| ENSGALT0000 agrin                                                | AGRN    | 0.968049 | 33436.9 |
| ENSGALT0000 agouti related protein homolog (mouse)               | AGRP    | 0.820095 | 6       |
| ENSGALT0000 angiotensinogen (serpin peptidase)                   | AGT     | 0.58244  | 2.5     |
| ENSGALT0000 ATP/GTP binding protein 1                            | AGTPBP1 | 0.910265 | 267.5   |
| ENSGALT0000 Type-1 angiotensin II receptor                       | AGTR1   | 0.659153 | 5       |
| ENSGALT0000 angiotensin II receptor, type 2                      | AGTR2   | 0.746496 | 60      |
| ENSGALT0000 angiotensin II receptor-associated protein 1         | AGTRAP  | 0.905641 | 448.5   |
| ENSGALT0000 alanine--glyoxylate aminotransferase                 | AGXT2   | 0.940168 | 47.5    |
| ENSGALT0000 alanine-glyoxylate aminotransferase 1                | AGXT2L1 | 0.979918 | 37.8375 |
| ENSGALT0000 alanine-glyoxylate aminotransferase 2                | AGXT2L2 | 0.991578 | 118.409 |
| ENSGALT0000 AT hook containing transcription factor 1            | AHCTF1  | 0.992356 | 1991.03 |
| ENSGALT0000 adenosylhomocysteinase                               | AHCY    | 0.722397 | 4744    |
| ENSGALT0000 adenosylhomocysteinase-like 1                        | AHCYL1  | 0.837443 | 3582.5  |
| ENSGALT0000 adenosylhomocysteinase-like 2                        | AHCYL2  | 0.910968 | 1877    |
| ENSGALT0000 Abelson helper integration site 1                    | AH11    | 0.962511 | 219     |
| ENSGALT0000 aryl hydrocarbon receptor                            | AHR     | 0.931548 | 1275.5  |
| ENSGALT0000 aryl-hydrocarbon receptor repressor                  | AHRR    | 0.796313 | 5.5     |
| ENSGALT0000 AHA1, activator of heat shock 90kDa class B member 1 | AHSA1   | 0.61575  | 2704.22 |
| ENSGALT0000 AHA1, activator of heat shock 90kDa class B member 2 | AHSA2   | 0.755057 | 818.279 |
| ENSGALT0000 alpha-2-HS-glycoprotein                              | AHSG    | 0.846939 | 2       |
| ENSGALT0000 activation-induced cytidine deaminase                | AICDA   | 0.828826 | 1       |
| ENSGALT0000 axin interactor, dorsalization associated            | AIDA    | 0.914143 | 854.003 |
| ENSGALT0000 allograft inflammatory factor 1-like                 | AIF1L   | 0.971088 | 2615.93 |
| ENSGALT0000 apoptosis-inducing factor, mitochondrial 1           | AIFM1   | 0.873346 | 2116    |
| ENSGALT0000 apoptosis-inducing factor, mitochondrial 2           | AIFM2   | 0.758692 | 114     |
| ENSGALT0000 apoptosis-inducing factor, mitochondrial 3           | AIFM3   | 0.985376 | 68.5    |
| ENSGALT0000 androgen-induced 1                                   | AIG1    | 0.962217 | 553.5   |
| ENSGALT0000 absent in melanoma 1                                 | AIM1    | 0.986737 | 67.5    |
| ENSGALT0000 absent in melanoma 1-like                            | AIM1L   | 0.939383 | 1360.5  |
| ENSGALT0000 aminoacyl tRNA synthetase complex 1                  | AIMP1   | 0.712279 | 1354    |
| ENSGALT0000 aminoacyl tRNA synthetase complex 2                  | AIMP2   | 0.824496 | 1010.5  |
| ENSGALT0000 aryl hydrocarbon receptor interactor                 | AIP     | 0.723369 | 571     |
| ENSGALT0000 aryl hydrocarbon receptor interactor 1               | AIPL1   | 0.893575 | 40      |
| ENSGALT0000 autoimmune regulator                                 | AIRE    | 0.899909 | 37.5    |
| ENSGALT0000 adenylylase kinase 2                                 | AK2     | 0.846799 | 3418.72 |
| ENSGALT0000 adenylylase kinase 3                                 | AK3     | 0.93351  | 219     |
| ENSGALT0000 adenylylase kinase 4                                 | AK4     | 0.945325 | 732     |
| ENSGALT0000 adenylylase kinase 5                                 | AK5     | 0.803649 | 83      |
| ENSGALT0000 adenylylase kinase 7                                 | AK7     | 0.975388 | 39.5    |
| ENSGALT0000 adenylylase kinase 8                                 | AK8     | 0.958331 | 104.5   |
| ENSGALT0000 A kinase (PRKA) anchor protein 1                     | AKAP1   | 0.944056 | 2149    |
| ENSGALT0000 A kinase (PRKA) anchor protein 10                    | AKAP10  | 0.93447  | 809.5   |
| ENSGALT0000 A kinase (PRKA) anchor protein 12                    | AKAP12  | 0.803524 | 1784    |

|                                                                 |          |         |
|-----------------------------------------------------------------|----------|---------|
| ENSGALT0000 A kinase (PRKA) anchor protein 13 AKAP13            | 0.998355 | 3031    |
| ENSGALT0000 A kinase (PRKA) anchor protein 14 AKAP14            | 0.5499   | 14      |
| ENSGALT0000 A kinase (PRKA) anchor protein 17 AKAP17A           | 0.976665 | 426.5   |
| ENSGALT0000 A kinase (PRKA) anchor protein 5 AKAP5              | 0.92773  | 110     |
| ENSGALT0000 A kinase (PRKA) anchor protein 6 AKAP6              | 0.726467 | 459.5   |
| ENSGALT0000 A kinase (PRKA) anchor protein 7 AKAP7              | 0.89334  | 112.5   |
| ENSGALT0000 A kinase (PRKA) anchor protein 8 AKAP8              | 0.832984 | 707.5   |
| ENSGALT0000 A kinase (PRKA) anchor protein 8-L AKAP8L           | 0.883636 | 2028    |
| ENSGALT0000 A kinase (PRKA) anchor protein (gamma) AKAP9        | 0.997909 | 3335.09 |
| ENSGALT0000 adenylate kinase domain containing AKD1             | 0.984085 | 9.5     |
| ENSGALT0000 A kinase (PRKA) interacting protein AKIP1           | 0.759593 | 165     |
| ENSGALT0000 akirin 2 AKIRIN2                                    | 0.854295 | 1397.5  |
| ENSGALT0000 aldo-keto reductase family 1, member 1 AKR1A1       | 0.921295 | 2479.46 |
| ENSGALT0000 aldo-keto reductase family 1, member 1B AKR1B10     | 0.996052 | 3838.71 |
| ENSGALT0000 aldo-keto reductase family 1, member 1B-L AKR1B1L   | 0.971104 | 1366.75 |
| ENSGALT0000 aldo-keto reductase family 1, member 1D AKR1D1      | 0.387012 | 1243.5  |
| ENSGALT0000 aldo-keto reductase family 7, member 1 AKR7A2       | 0.769983 | 2083    |
| ENSGALT0000 v-akt murine thymoma viral oncogene AKT1            | 0.972155 | 1445.78 |
| ENSGALT0000 v-akt murine thymoma viral oncogene AKT3            | 0.945178 | 405.206 |
| ENSGALT0000 AKT interacting protein AKTIP                       | 0.972464 | 825.005 |
| ENSGALT0000 Delta-aminolevulinic acid dehydratase ALAD          | 0.669381 | 905.5   |
| ENSGALT0000 aminolevulinic acid, delta-, synthase 1 ALAS1       | 0.693428 | 1606.49 |
| ENSGALT0000 albumin ALB                                         | 0.943377 | 31.5    |
| ENSGALT0000 ALC protein ALC                                     | 0.942516 | 736     |
| ENSGALT0000 activated leukocyte cell adhesion molecule ALCAM    | 0.952513 | 2328    |
| ENSGALT0000 aldehyde dehydrogenase 18 family ALDH18A1           | 0.988287 | 1463.5  |
| ENSGALT0000 aldehyde dehydrogenase 1 family, class 1 ALDH1A1    | 0.818488 | 1       |
| ENSGALT0000 aldehyde dehydrogenase 1 family, class 1 ALDH1A2    | 0.748642 | 447     |
| ENSGALT0000 aldehyde dehydrogenase 1 family, class 1 ALDH1A3    | 0.389884 | 725     |
| ENSGALT0000 aldehyde dehydrogenase 1 family, class 1 ALDH1L2    | 0.885626 | 950.254 |
| ENSGALT0000 aldehyde dehydrogenase 2 family, class 1 ALDH2      | 0.811782 | 4033    |
| ENSGALT0000 aldehyde dehydrogenase 3 family, class 1 ALDH3A2    | 0.910135 | 2821.5  |
| ENSGALT0000 aldehyde dehydrogenase 3 family, class 1 ALDH3B1    | 0.748983 | 117     |
| ENSGALT0000 aldehyde dehydrogenase 5 family, class 1 ALDH5A1    | 0.92071  | 648     |
| ENSGALT0000 aldehyde dehydrogenase 6 family, class 1 ALDH6A1    | 0.981887 | 1488.5  |
| ENSGALT0000 aldehyde dehydrogenase 7 family, class 1 ALDH7A1    | 0.904051 | 6658.5  |
| ENSGALT0000 aldehyde dehydrogenase 8 family, class 1 ALDH8A1    | 0.603682 | 1       |
| ENSGALT0000 aldehyde dehydrogenase 9 family, class 1 ALDH9A1    | 0.859026 | 6171    |
| ENSGALT0000 aldolase B, fructose-bisphosphate ALDOB             | 0.147193 | 41      |
| ENSGALT0000 asparagine-linked glycosylation 1, class 1 ALG1     | 0.942797 | 474     |
| ENSGALT0000 asparagine-linked glycosylation 10, class 1 ALG10   | 0.937919 | 453.5   |
| ENSGALT0000 asparagine-linked glycosylation 11, class 1 ALG11   | 0.915921 | 370     |
| ENSGALT0000 asparagine-linked glycosylation 12, class 1 ALG12   | 0.967232 | 1724.46 |
| ENSGALT0000 asparagine-linked glycosylation 13, class 1 ALG13   | 0.911946 | 711.5   |
| ENSGALT0000 asparagine-linked glycosylation 14, class 1 ALG14   | 0.960001 | 193.5   |
| ENSGALT0000 asparagine-linked glycosylation 2, class 1 ALG2     | 0.977128 | 642.5   |
| ENSGALT0000 asparagine-linked glycosylation 3, class 1 ALG3     | 0.948829 | 857     |
| ENSGALT0000 asparagine-linked glycosylation 5, class 1 ALG5     | 0.972418 | 347.999 |
| ENSGALT0000 asparagine-linked glycosylation 6, class 1 ALG6     | 0.965373 | 588     |
| ENSGALT0000 asparagine-linked glycosylation 8, class 1 ALG8     | 0.967034 | 891.5   |
| ENSGALT0000 asparagine-linked glycosylation 9, class 1 ALG9     | 0.960322 | 1092.5  |
| ENSGALT0000 anaplastic lymphoma receptor tyrosine kinase ALK    | 0.929795 | 299.499 |
| ENSGALT0000 alkB, alkylation repair homolog 1 (E. coli) EALKBH1 | 0.913639 | 841     |
| ENSGALT0000 alkB, alkylation repair homolog 2 (E. coli) EALKBH2 | 0.879334 | 244.701 |
| ENSGALT0000 alkB, alkylation repair homolog 3 (E. coli) EALKBH3 | 0.987228 | 703     |
| ENSGALT0000 alkB, alkylation repair homolog 4 (E. coli) EALKBH4 | 0.855352 | 54      |

|             |                                              |           |         |
|-------------|----------------------------------------------|-----------|---------|
| ENSGALT0000 | alkB, alkylation repair homolog 5 (EALKBH5   | 0.963869  | 907.5   |
| ENSGALT0000 | alkB, alkylation repair homolog 8 (EALKBH8   | 0.977592  | 465.5   |
| ENSGALT0000 | Alstrom syndrome 1 ALMS1                     | 0.966361  | 299.5   |
| ENSGALT0000 | arachidonate 5-lipoxygenase ALOX5            | 0.908957  | 31.5    |
| ENSGALT0000 | arachidonate 5-lipoxygenase-activat ALOX5AP  | 0.967437  | 119     |
| ENSGALT0000 | alpha-kinase 1 ALPK1                         | 0.994006  | 5.5     |
| ENSGALT0000 | alpha-kinase 2 ALPK2                         | 0.913242  | 34.5    |
| ENSGALT0000 | alpha-kinase 3 ALPK3                         | 0.975735  | 837.102 |
| ENSGALT0000 | alkaline phosphatase, liver/bone/kid ALPL    | 0.952617  | 1194    |
| ENSGALT0000 | amyotrophic lateral sclerosis 2 (juv ALS2    | 0.998229  | 2397    |
| ENSGALT0000 | ALS2 C-terminal like ALS2CL                  | 0.900952  | 105     |
| ENSGALT0000 | amyotrophic lateral sclerosis 2 (juv ALS2CR8 | 0.996013  | 420.5   |
| ENSGALT0000 | ALX homeobox 1 ALX1                          | 0.562993  | 1.5     |
| ENSGALT0000 | ALX homeobox 4 ALX4                          | 0.577129  | 10.5    |
| ENSGALT0000 | alpha-methylacyl-CoA racemase AMACR          | 0.930548  | 277.5   |
| ENSGALT0000 | alpha-1-microglobulin/bikunin precu AMBP     | 0.853815  | 2.5     |
| ENSGALT0000 | autophagy/beclin-1 regulator 1 AMBRA1        | 0.973635  | 2856.08 |
| ENSGALT0000 | adenosylmethionine decarboxylase AMD1        | 0.828653  | 1017.5  |
| ENSGALT0000 | amidohydrolase domain containing AMDHD1      | 0.937862  | 43.5    |
| ENSGALT0000 | amidohydrolase domain containing AMDHD2      | 0.926909  | 919     |
| ENSGALT0000 | autocrine motility factor receptor AMFR      | 0.953613  | 2722.5  |
| ENSGALT0000 | anti-Mullerian hormone AMH                   | 0.93587   | 1066.51 |
| ENSGALT0000 | adhesion molecule, interacts with CAMICA1    | 0.954432  | 74      |
| ENSGALT0000 | adhesion molecule with Ig-like dom AMIGO2    | 0.525199  | 96.5    |
| ENSGALT0000 | Alport syndrome, mental retardatio AMMECR1   | 0.973823  | 274.5   |
| ENSGALT0000 | AMME chromosomal region gene 1 AMMECR1L      | 0.975941  | 784.5   |
| ENSGALT0000 | amnionless homolog (mouse) AMN               | 0.0252674 | 46.5    |
| ENSGALT0000 | antagonist of mitotic exit network 1 AMN1    | 0.911492  | 76      |
| ENSGALT0000 | angiomin                                     | 0.970154  | 2304    |
| ENSGALT0000 | angiomin like 1 AMOTL1                       | 0.836766  | 390.5   |
| ENSGALT0000 | angiomin like 2 AMOTL2                       | 0.834715  | 1154.5  |
| ENSGALT0000 | Antimicrobial peptide CHP1 AMP1_CHICK        | 0.576264  | 4.5     |
| ENSGALT0000 | AMP deaminase 1 AMPD1                        | 0.931818  | 35      |
| ENSGALT0000 | adenosine monophosphate deamin AMPD3         | 0.956847  | 294.5   |
| ENSGALT0000 | amphiphysin AMPH                             | 0.751285  | 281     |
| ENSGALT0000 | amylase, alpha 1A; salivary AMY1A            | 0.946568  | 608.439 |
| ENSGALT0000 | amylase, alpha 2A; pancreatic AMY2A          | 0.574457  | 23.5609 |
| ENSGALT0000 | archaelysin family metallopeptidase AMZ1     | 0.655887  | 17      |
| ENSGALT0000 | anaphase promoting complex subu ANAPC1       | 0.943847  | 2441.5  |
| ENSGALT0000 | anaphase promoting complex subu ANAPC10      | 0.962189  | 166.5   |
| ENSGALT0000 | anaphase promoting complex subu ANAPC16      | 0.626276  | 2026.5  |
| ENSGALT0000 | anaphase promoting complex subu ANAPC2       | 0.760379  | 3103    |
| ENSGALT0000 | anaphase promoting complex subu ANAPC4       | 0.925103  | 921     |
| ENSGALT0000 | anaphase promoting complex subu ANAPC5       | 0.920882  | 855.725 |
| ENSGALT0000 | anaphase promoting complex subu ANAPC7       | 0.926075  | 1138.5  |
| ENSGALT0000 | angiogenin, ribonuclease, RNase A ANG        | 0.0657538 | 0.00114 |
| ENSGALT0000 | angel homolog 1 (Drosophila) ANGEL1          | 0.980263  | 2325.48 |
| ENSGALT0000 | angel homolog 2 (Drosophila) ANGEL2          | 0.980531  | 716.5   |
| ENSGALT0000 | angiopoietin 1 ANGPT1                        | 0.98565   | 128.5   |
| ENSGALT0000 | angiopoietin 2 ANGPT2                        | 0.725465  | 551.501 |
| ENSGALT0000 | angiopoietin-like 1 ANGPTL1                  | 0.995375  | 639     |
| ENSGALT0000 | angiopoietin-like 2 ANGPTL2                  | 0.999228  | 461     |
| ENSGALT0000 | angiopoietin-like 3 ANGPTL3                  | 0.722096  | 0.5     |
| ENSGALT0000 | angiopoietin-like 4 ANGPTL4                  | 0.939699  | 471.5   |
| ENSGALT0000 | angiopoietin-like 5 ANGPTL5                  | ?         | 0       |
| ENSGALT0000 | angiopoietin-like 6 ANGPTL6                  | 0.745679  | 7.49221 |

|             |                                     |          |          |         |
|-------------|-------------------------------------|----------|----------|---------|
| ENSGALT0000 | angiopoietin-like 7                 | ANGPTL7  | 1        | 1.5     |
| ENSGALT0000 | ankyrin 1, erythrocytic             | ANK1     | 0.782171 | 82.5    |
| ENSGALT0000 | ankyrin 2, neuronal                 | ANK2     | 0.871878 | 7287.5  |
| ENSGALT0000 | ankyrin 3, node of Ranvier (ankyrin | ANK3     | 0.954295 | 5236.58 |
| ENSGALT0000 | ankyrin repeat and death domain c   | ANKDD1A  | 0.923527 | 165.5   |
| ENSGALT0000 | ankyrin repeat and death domain c   | ANKDD1B  | 0.946402 | 8.5     |
| ENSGALT0000 | ankyrin-repeat and fibronectin type | ANKFN1   | 0.569341 | 5       |
| ENSGALT0000 | ankyrin repeat and FYVE domain c    | ANKFY1   | 0.950137 | 2751.5  |
| ENSGALT0000 | ankylosis, progressive homolog      | ANKH     | 0.893553 | 1429    |
| ENSGALT0000 | ankyrin repeat and KH domain con    | ANKHD1   | 0.986119 | 4801    |
| ENSGALT0000 | ankyrin repeat and IBR domain cor   | ANKIB1   | 0.977884 | 1804.5  |
| ENSGALT0000 | ankyrin repeat and kinase domain c  | ANKK1    | 0.638664 | 3.5     |
| ENSGALT0000 | ankyrin repeat and LEM domain co    | ANKLE2   | 0.981168 | 1507    |
| ENSGALT0000 | ankyrin repeat and MYND domain c    | ANKMY2   | 0.965007 | 984     |
| ENSGALT0000 | ankyrin repeat, family A (RFXANK-   | ANKRA2   | 0.893527 | 1348.49 |
| ENSGALT0000 | ankyrin repeat domain 1 (cardiac r  | ANKRD1   | 0.995037 | 8.5     |
| ENSGALT0000 | ankyrin repeat domain 10            | ANKRD10  | 0.955207 | 1392.51 |
| ENSGALT0000 | ankyrin repeat domain 13A           | ANKRD13A | 0.951737 | 1671    |
| ENSGALT0000 | ankyrin repeat domain 13C           | ANKRD13C | 0.960288 | 860.5   |
| ENSGALT0000 | ankyrin repeat domain 16            | ANKRD16  | 0.950054 | 456     |
| ENSGALT0000 | ankyrin repeat domain 17            | ANKRD17  | 0.958195 | 2855.5  |
| ENSGALT0000 | ankyrin repeat domain 2 (stretch re | ANKRD2   | 0.721986 | 7.5     |
| ENSGALT0000 | ankyrin repeat domain 22            | ANKRD22  | 0.874595 | 7.5     |
| ENSGALT0000 | ankyrin repeat domain 24            | ANKRD24  | 0.740612 | 286.5   |
| ENSGALT0000 | ankyrin repeat domain 27 (VPS9 dc   | ANKRD27  | 0.981956 | 268.5   |
| ENSGALT0000 | ankyrin repeat domain 28            | ANKRD28  | 0.980377 | 1546    |
| ENSGALT0000 | ankyrin repeat domain 29            | ANKRD29  | 0.922478 | 6.5     |
| ENSGALT0000 | ankyrin repeat domain 31            | ANKRD31  | 0.994079 | 583     |
| ENSGALT0000 | ankyrin repeat domain 33            | ANKRD33  | 0.911269 | 9       |
| ENSGALT0000 | ankyrin repeat domain 33B           | ANKRD33B | 0.634769 | 2.5     |
| ENSGALT0000 | ankyrin repeat domain 34B           | ANKRD34B | 0.890503 | 16.5    |
| ENSGALT0000 | ankyrin repeat domain 34C           | ANKRD34C | 0.711618 | 28      |
| ENSGALT0000 | ankyrin repeat domain 40            | ANKRD40  | 0.903115 | 487.5   |
| ENSGALT0000 | ankyrin repeat domain 42            | ANKRD42  | 0.986412 | 76      |
| ENSGALT0000 | ankyrin repeat domain 44            | ANKRD44  | 0.851442 | 1384.99 |
| ENSGALT0000 | ankyrin repeat domain 46            | ANKRD46  | 0.959205 | 906.5   |
| ENSGALT0000 | ankyrin repeat domain 49            | ANKRD49  | 0.83287  | 319.5   |
| ENSGALT0000 | ankyrin repeat domain 5             | ANKRD5   | 0.955046 | 98.5    |
| ENSGALT0000 | ankyrin repeat domain 50            | ANKRD50  | 0.977246 | 3820    |
| ENSGALT0000 | hypothetical protein LOC426469      | ANKRD52  | 0.955483 | 1745.5  |
| ENSGALT0000 | ankyrin repeat domain 54            | ANKRD54  | 0.936753 | 1175    |
| ENSGALT0000 | ankyrin repeat domain 55            | ANKRD55  | 0.862425 | 2       |
| ENSGALT0000 | ankyrin repeat domain 56            | ANKRD56  | 0.623451 | 17.5    |
| ENSGALT0000 | ankyrin repeat domain 6             | ANKRD6   | 0.799948 | 455.229 |
| ENSGALT0000 | ankyrin repeat domain 60            | ANKRD60  | 0.715119 | 4.5     |
| ENSGALT0000 | ankyrin repeat domain 61            | ANKRD61  | 0.976945 | 11      |
| ENSGALT0000 | ankyrin repeat domain 9             | ANKRD9   | 0.824619 | 13      |
| ENSGALT0000 | ankyrin repeat and sterile alpha mc | ANKS1A   | 0.978262 | 1702.5  |
| ENSGALT0000 | ankyrin repeat and sterile alpha mc | ANKS1B   | 0.931962 | 133     |
| ENSGALT0000 | ankyrin repeat and sterile alpha mc | ANKS3    | 0.989477 | 520.5   |
| ENSGALT0000 | ankyrin repeat and sterile alpha mc | ANKS4B   | 0.936174 | 33.7874 |
| ENSGALT0000 | ankyrin repeat and sterile alpha mc | ANKS6    | 0.982147 | 384     |
| ENSGALT0000 | ankyrin repeat and zinc finger domi | ANKZF1   | 0.939111 | 1209.49 |
| ENSGALT0000 | anillin, actin binding protein      | ANLN     | 0.886658 | 857.499 |
| ENSGALT0000 | anoctamin 1, calcium activated chlk | ANO1     | 0.88168  | 48      |
| ENSGALT0000 | anoctamin 10                        | ANO10    | 0.976132 | 326.5   |



|                                                              |         |          |         |
|--------------------------------------------------------------|---------|----------|---------|
| ENSGALT0000 anoctamin 2                                      | ANO2    | 0.956791 | 5.5     |
| ENSGALT0000 anoctamin 3                                      | ANO3    | 0.977712 | 220.5   |
| ENSGALT0000 anoctamin 4                                      | ANO4    | 0.623907 | 47      |
| ENSGALT0000 anoctamin 5                                      | ANO5    | 0.904391 | 1943.5  |
| ENSGALT0000 anoctamin 6                                      | ANO6    | 0.666535 | 108     |
| ENSGALT0000 anoctamin 9                                      | ANO9    | 0.657742 | 12      |
| ENSGALT0000 acidic (leucine-rich) nuclear phosphatase ANP32A | ANP32A  | 0.929233 | 2501    |
| ENSGALT0000 acidic (leucine-rich) nuclear phosphatase ANP32B | ANP32B  | 0.979261 | 14895.2 |
| ENSGALT0000 acidic (leucine-rich) nuclear phosphatase ANP32E | ANP32E  | 0.910741 | 8442.29 |
| ENSGALT0000 alanyl (membrane) aminopeptidase ANPEP           | ANPEP   | 0.825845 | 118.5   |
| ENSGALT0000 anthrax toxin receptor 1                         | ANTXR1  | 0.772117 | 78      |
| ENSGALT0000 anthrax toxin receptor 2                         | ANTXR2  | 0.963414 | 803.5   |
| ENSGALT0000 anthrax toxin receptor-like                      | ANTXRL  | 0.990911 | 800     |
| ENSGALT0000 annexin A1                                       | ANXA1   | 0.980523 | 23.5    |
| ENSGALT0000 annexin A10                                      | ANXA10  | 0.464758 | 0       |
| ENSGALT0000 annexin A11                                      | ANXA11  | 0.954001 | 770.999 |
| ENSGALT0000 annexin A13                                      | ANXA13  | 0.772997 | 5       |
| ENSGALT0000 annexin A2                                       | ANXA2   | 0.762266 | 2558    |
| ENSGALT0000 annexin A5                                       | ANXA5   | 0.773014 | 2944.01 |
| ENSGALT0000 annexin A6                                       | ANXA6   | 0.772994 | 6186.03 |
| ENSGALT0000 annexin A7                                       | ANXA7   | 0.960057 | 570.5   |
| ENSGALT0000 annexin A8                                       | ANXA8   | 0.633543 | 360.5   |
| ENSGALT0000 acyloxyacyl hydrolase (neutrophil)               | AOAH    | 0.781177 | 42      |
| ENSGALT0000 aldehyde oxidase 1                               | AOX1    | 0.982779 | 176.5   |
| ENSGALT0000 aldehyde oxidase 2 pseudogene                    | AOX2P   | 0.973813 | 125     |
| ENSGALT0000 adaptor-related protein complex 1, subunit AP1AR | AP1AR   | 0.999817 | 532     |
| ENSGALT0000 adaptor-related protein complex 1, subunit AP1B1 | AP1B1   | 0.890003 | 4085.81 |
| ENSGALT0000 adaptor-related protein complex 1, subunit AP1G1 | AP1G1   | 0.970266 | 5600.5  |
| ENSGALT0000 adaptor-related protein complex 1, subunit AP1M1 | AP1M1   | 0.835598 | 2218.5  |
| ENSGALT0000 adaptor-related protein complex 1, subunit AP1S2 | AP1S2   | 0.801648 | 1235.01 |
| ENSGALT0000 adaptor-related protein complex 1, subunit AP1S3 | AP1S3   | 0.99443  | 644.5   |
| ENSGALT0000 adaptor-related protein complex 2, subunit AP2A2 | AP2A2   | 0.921945 | 6244.56 |
| ENSGALT0000 adaptor-related protein complex 2, subunit AP2B1 | AP2B1   | 0.937293 | 5389.78 |
| ENSGALT0000 adaptor-related protein complex 2, subunit AP2M1 | AP2M1   | 0.84504  | 12992.5 |
| ENSGALT0000 adaptor-related protein complex 2, subunit AP2S1 | AP2S1   | 0.817165 | 943     |
| ENSGALT0000 adaptor-related protein complex 3, subunit AP3B1 | AP3B1   | 0.991754 | 1620.5  |
| ENSGALT0000 adaptor-related protein complex 3, subunit AP3B2 | AP3B2   | 0.718811 | 2447    |
| ENSGALT0000 adaptor-related protein complex 3, subunit AP3D1 | AP3D1   | 0.953755 | 4638.36 |
| ENSGALT0000 adaptor-related protein complex 3, subunit AP3M1 | AP3M1   | 0.931693 | 3687    |
| ENSGALT0000 adaptor-related protein complex 3, subunit AP3M2 | AP3M2   | 0.930424 | 1343    |
| ENSGALT0000 adaptor-related protein complex 3, subunit AP3S1 | AP3S1   | 0.969048 | 1226.49 |
| ENSGALT0000 adaptor-related protein complex 3, subunit AP3S2 | AP3S2   | 0.648802 | 2174    |
| ENSGALT0000 adaptor-related protein complex 4, subunit AP4B1 | AP4B1   | 0.958927 | 1592.99 |
| ENSGALT0000 adaptor-related protein complex 4, subunit AP4E1 | AP4E1   | 0.97879  | 845.999 |
| ENSGALT0000 adaptor-related protein complex 4, subunit AP4S1 | AP4S1   | 0.873576 | 92      |
| ENSGALT0000 apoptotic peptidase activating factor 1          | APAF1   | 0.990284 | 592.498 |
| ENSGALT0000 amyloid beta (A4) precursor protein APBA1        | APBA1   | 0.930412 | 642     |
| ENSGALT0000 amyloid beta (A4) precursor protein APBA2        | APBA2   | 0.757994 | 1408    |
| ENSGALT0000 amyloid beta (A4) precursor protein APBA3        | APBA3   | 0.956805 | 1200.5  |
| ENSGALT0000 amyloid beta (A4) precursor protein APBB1IP      | APBB1IP | 0.699139 | 434.5   |
| ENSGALT0000 amyloid beta (A4) precursor protein APBB2        | APBB2   | 0.961358 | 1671.94 |
| ENSGALT0000 amyloid beta (A4) precursor protein APBB3        | APBB3   | 0.556363 | 201     |
| ENSGALT0000 adenomatous polyposis coli                       | APC     | 0.937004 | 2250.51 |
| ENSGALT0000 adenomatosis polyposis coli down-regulated 1     | APCDD1  | 0.739537 | 1843    |
| ENSGALT0000 adenomatosis polyposis coli down-regulated 1L    | APCDD1L | 0.634342 | 65.5    |
| ENSGALT0000 N-acylaminoacyl-peptide hydrolase                | APEH    | 0.857055 | 1151    |

|                                                                          |           |          |         |
|--------------------------------------------------------------------------|-----------|----------|---------|
| ENSGALT0000 anterior pharynx defective 1 homolog                         | APH1A     | 0.875432 | 519     |
| ENSGALT0000 apoptosis inhibitor 5                                        | API5      | 0.913041 | 2144.13 |
| ENSGALT0000 APAF1 interacting protein                                    | APIP      | 0.980522 | 805.5   |
| ENSGALT0000 apoptosis-inducing, TAF9-like domain                         | APITD1    | 0.953441 | 415     |
| ENSGALT0000 aprataxin and PNKP like factor                               | APLF      | 0.940957 | 312.499 |
| ENSGALT0000 apelin receptor                                              | APLNR     | 0.668593 | 213     |
| ENSGALT0000 amyloid beta (A4) precursor-like protein                     | APLP2     | 0.946427 | 11756.5 |
| ENSGALT0000 apolipoprotein A-I                                           | APOA1     | 0.207307 | 2350.46 |
| ENSGALT0000 apolipoprotein A-I binding protein                           | APOA1BP   | 0.75486  | 1497.5  |
| ENSGALT0000 apolipoprotein A-IV                                          | APOA4     | 0.742393 | 0.5     |
| ENSGALT0000 apolipoprotein A-V                                           | APOA5     | 0.769911 | 58.5    |
| ENSGALT0000 apolipoprotein B (including Ag(x) and Ag(y) isoforms)        | APOB      | 0.19245  | 0       |
| ENSGALT0000 apolipoprotein B mRNA editing enzyme, cytosolic class 2B     | APOBEC2   | 0.986266 | 41.5    |
| ENSGALT0000 apolipoprotein B mRNA editing enzyme, cytosolic class 4      | APOBEC4   | 0.464758 | 0       |
| ENSGALT0000 apolipoprotein D                                             | APOD      | 0.916039 | 28.5    |
| ENSGALT0000 apolipoprotein H (beta-2-glycoprotein I)                     | APOH      | 0.740073 | 0.5     |
| ENSGALT0000 apolipoprotein L domain containing                           | APOLD1    | 0.663833 | 10.5    |
| ENSGALT0000 apolipoprotein O                                             | APOO      | 0.898787 | 704.5   |
| ENSGALT0000 apolipoprotein O-like                                        | APOOL     | 0.993749 | 353     |
| ENSGALT0000 apoptogenic 1                                                | APOPT1    | 0.956826 | 496     |
| ENSGALT0000 lipoprotein                                                  | APOVLDLII | 0.464758 | 0.5     |
| ENSGALT0000 amyloid beta (A4) precursor protein                          | APP       | 0.995498 | 38481.9 |
| ENSGALT0000 amyloid beta precursor protein (cytosolic)                   | APPBP2    | 0.949791 | 1370    |
| ENSGALT0000 adaptor protein, phosphotyrosine interacting 1               | APPL1     | 0.968973 | 388     |
| ENSGALT0000 adaptor protein, phosphotyrosine interacting 2               | APPL2     | 0.958466 | 840.5   |
| ENSGALT0000 aprataxin                                                    | APTX      | 0.9519   | 531.002 |
| ENSGALT0000 aquaporin 1 (Colton blood group)                             | AQP1      | 0.774215 | 20.5    |
| ENSGALT0000 aquaporin 11                                                 | AQP11     | 0.994651 | 71.5    |
| ENSGALT0000 aquaporin 12                                                 | AQP12     | 0.866057 | 8.5     |
| ENSGALT0000 aquaporin 2 (collecting duct)                                | AQP2      | 0.464758 | 0       |
| ENSGALT0000 aquaporin 3 (Gill blood group)                               | AQP3      | 0.603682 | 0.5     |
| ENSGALT0000 aquaporin 4                                                  | AQP4      | 0.605494 | 44      |
| ENSGALT0000 aquaporin 5                                                  | AQP5      | 0.67369  | 10      |
| ENSGALT0000 aquaporin 7                                                  | AQP7      | 0.649519 | 0       |
| ENSGALT0000 aquaporin 8                                                  | AQP8      | 0.962735 | 3       |
| ENSGALT0000 aquaporin 9                                                  | AQP9      | 0.877641 | 4.5     |
| ENSGALT0000 aquarius homolog (mouse)                                     | AQR       | 0.948421 | 1969.5  |
| ENSGALT0000 androgen receptor                                            | AR        | 0.783315 | 1171.5  |
| ENSGALT0000 ArfGAP with RhoGAP domain, anchored to membrane              | ARAP2     | 0.889607 | 468     |
| ENSGALT0000 ArfGAP with RhoGAP domain, anchored to membrane              | ARAP3     | 0.858045 | 727.5   |
| ENSGALT0000 activity-regulated cytoskeleton-associated protein           | ARC       | ?        | 0       |
| ENSGALT0000 archain 1                                                    | ARCN1     | 0.927187 | 7567    |
| ENSGALT0000 amphiregulin B                                               | AREGB     | 0.724198 | 34.5    |
| ENSGALT0000 ADP-ribosylation factor 1                                    | ARF1      | 0.8426   | 16437.4 |
| ENSGALT0000 ADP-ribosylation factor 4                                    | ARF4      | 0.742227 | 6532    |
| ENSGALT0000 ADP-ribosylation factor GTPase activating protein 1          | ARFGAP1   | 0.946275 | 2243    |
| ENSGALT0000 ADP-ribosylation factor GTPase activating protein 2          | ARFGAP2   | 0.881786 | 1806.5  |
| ENSGALT0000 ADP-ribosylation factor GTPase activating protein 3          | ARFGAP3   | 0.996654 | 1757.03 |
| ENSGALT0000 ADP-ribosylation factor guanine nucleotide exchange factor 1 | ARFGEF1   | 0.934122 | 2646    |
| ENSGALT0000 ADP-ribosylation factor guanine nucleotide exchange factor 2 | ARFGEF2   | 0.971358 | 967     |
| ENSGALT0000 ADP-ribosylation factor interacting protein 1                | ARFIP1    | 0.954311 | 845.502 |
| ENSGALT0000 ADP-ribosylation factor interacting protein 2                | ARFIP2    | 0.921265 | 930.991 |
| ENSGALT0000 ADP-ribosylation factor related protein                      | ARFRP1    | 0.925432 | 685.5   |
| ENSGALT0000 arginine and glutamate rich 1                                | ARGLU1    | 0.980284 | 5253.5  |
| ENSGALT0000 Rho GTPase activating protein 1                              | ARHGAP1   | 0.97607  | 2198    |
| ENSGALT0000 Rho GTPase activating protein 10                             | ARHGAP10  | 0.985667 | 516.5   |

|                                                             |           |          |         |
|-------------------------------------------------------------|-----------|----------|---------|
| ENSGALT0000 Rho GTPase activating protein 11A               | ARHGAP11A | 0.853853 | 178     |
| ENSGALT0000 Rho GTPase activating protein 12                | ARHGAP12  | 0.969621 | 891     |
| ENSGALT0000 Rho GTPase activating protein 15                | ARHGAP15  | 0.558427 | 14      |
| ENSGALT0000 Rho GTPase activating protein 17                | ARHGAP17  | 0.979429 | 6093.45 |
| ENSGALT0000 Rho GTPase activating protein 18                | ARHGAP18  | 0.864292 | 1061.82 |
| ENSGALT0000 Rho GTPase activating protein 19                | ARHGAP19  | 0.826687 | 1823.5  |
| ENSGALT0000 Rho GTPase activating protein 20                | ARHGAP20  | 0.833841 | 23.5    |
| ENSGALT0000 Rho GTPase activating protein 21                | ARHGAP21  | 0.978153 | 3022.5  |
| ENSGALT0000 Rho GTPase activating protein 22                | ARHGAP22  | 0.961511 | 118.5   |
| ENSGALT0000 Rho GTPase activating protein 24                | ARHGAP24  | 0.988847 | 513.5   |
| ENSGALT0000 Rho GTPase activating protein 25                | ARHGAP25  | 0.797275 | 26.5    |
| ENSGALT0000 Rho GTPase activating protein 26                | ARHGAP26  | 0.978879 | 1282.51 |
| ENSGALT0000 Rho GTPase activating protein 28                | ARHGAP28  | 0.768137 | 345.5   |
| ENSGALT0000 Rho GTPase activating protein 29                | ARHGAP29  | 0.974521 | 653.5   |
| ENSGALT0000 Rho GTPase activating protein 31                | ARHGAP31  | 0.754907 | 531.5   |
| ENSGALT0000 Rho GTPase activating protein 32                | ARHGAP32  | 0.954858 | 2764.23 |
| ENSGALT0000 Rho GTPase activating protein 35                | ARHGAP35  | 0.962355 | 11886   |
| ENSGALT0000 Rho GTPase activating protein 36                | ARHGAP36  | 1        | 4.5     |
| ENSGALT0000 Rho GTPase activating protein 39                | ARHGAP39  | 0.949689 | 1235    |
| ENSGALT0000 Rho GTPase activating protein 40                | ARHGAP40  | 0.824994 | 99.5001 |
| ENSGALT0000 Rho GTPase activating protein 42                | ARHGAP42  | 0.997499 | 492     |
| ENSGALT0000 Rho GTPase activating protein 44                | ARHGAP44  | 0.975891 | 603     |
| ENSGALT0000 Rho GTPase activating protein 5                 | ARHGAP5   | 0.975847 | 2084    |
| ENSGALT0000 Rho GTPase activating protein 6                 | ARHGAP6   | 0.969484 | 282.499 |
| ENSGALT0000 Rho GTPase activating protein 8                 | ARHGAP8   | 0.980266 | 220     |
| ENSGALT0000 Rho GDP dissociation inhibitor (GDI)            | ARHGDI    | 0.764291 | 5449    |
| ENSGALT0000 Rho GDP dissociation inhibitor (GDI)            | ARHGDI    | 0.685938 | 4297.5  |
| ENSGALT0000 Rho guanine nucleotide exchange factor 10       | ARHGEF10  | 0.847926 | 845.782 |
| ENSGALT0000 Rho guanine nucleotide exchange factor 10L      | ARHGEF10L | 0.957717 | 2452.93 |
| ENSGALT0000 Rho guanine nucleotide exchange factor 11       | ARHGEF11  | 0.956294 | 3512.5  |
| ENSGALT0000 Rho guanine nucleotide exchange factor 12       | ARHGEF12  | 0.967632 | 3494.5  |
| ENSGALT0000 Rho guanine nucleotide exchange factor 16       | ARHGEF16  | 0.85698  | 1135.5  |
| ENSGALT0000 Rho guanine nucleotide exchange factor 17       | ARHGEF17  | 0.879153 | 1569    |
| ENSGALT0000 rho/rac guanine nucleotide exchange factor 18   | ARHGEF18  | 0.986318 | 1067.5  |
| ENSGALT0000 Rho guanine nucleotide exchange factor 19       | ARHGEF19  | 0.946816 | 587     |
| ENSGALT0000 Rho guanine nucleotide exchange factor 26       | ARHGEF26  | 0.98727  | 248     |
| ENSGALT0000 Rho guanine nucleotide exchange factor 3        | ARHGEF3   | 0.907887 | 401.5   |
| ENSGALT0000 Rho guanine nucleotide exchange factor 37       | ARHGEF37  | 0.906099 | 137     |
| ENSGALT0000 Rho guanine nucleotide exchange factor 4        | ARHGEF4   | 0.992794 | 432     |
| ENSGALT0000 Rac/Cdc42 guanine nucleotide exchange factor 6  | ARHGEF6   | 0.860528 | 1479    |
| ENSGALT0000 Rho guanine nucleotide exchange factor 7        | ARHGEF7   | 0.889032 | 1060    |
| ENSGALT0000 Cdc42 guanine nucleotide exchange factor 9      | ARHGEF9   | 0.792651 | 112     |
| ENSGALT0000 AT rich interactive domain 1A (SWI6)            | ARID1A    | 0.993322 | 1962.32 |
| ENSGALT0000 AT rich interactive domain 1B (SWI6)            | ARID1B    | 0.972109 | 6147.19 |
| ENSGALT0000 AT rich interactive domain 2 (ARID1A)           | ARID2     | 0.977193 | 1928.5  |
| ENSGALT0000 AT rich interactive domain 3B (BRIC1)           | ARID3B    | 0.947667 | 1514.5  |
| ENSGALT0000 AT rich interactive domain 3C (BRIC1)           | ARID3C    | 0.739984 | 31      |
| ENSGALT0000 AT rich interactive domain 4A (RBP20)           | ARID4A    | 0.974283 | 982.497 |
| ENSGALT0000 AT rich interactive domain 4B (RBP20)           | ARID4B    | 0.997752 | 844.492 |
| ENSGALT0000 AT rich interactive domain 5A (MRF1)            | ARID5A    | 0.869866 | 128.5   |
| ENSGALT0000 AT rich interactive domain 5B (MRF1)            | ARID5B    | 0.937694 | 2292.5  |
| ENSGALT0000 ariadne homolog, ubiquitin-conjugating enzyme 1 | ARIH1     | 0.935669 | 3087.45 |
| ENSGALT0000 ariadne homolog 2 (Drosophila)                  | ARIH2     | 0.96149  | 1104    |
| ENSGALT0000 ADP-ribosylation factor-like 1                  | ARL1      | 0.705365 | 2380    |
| ENSGALT0000 ADP-ribosylation factor-like 10                 | ARL10     | 0.782406 | 107.5   |
| ENSGALT0000 ADP-ribosylation factor-like 11                 | ARL11     | 0.984952 | 57.5    |

|                                                              |         |          |         |
|--------------------------------------------------------------|---------|----------|---------|
| ENSGALT0000 ADP-ribosylation factor-like 13A                 | ARL13A  | 0.464758 | 0       |
| ENSGALT0000 ADP-ribosylation factor-like 13B                 | ARL13B  | 0.986988 | 403.5   |
| ENSGALT0000 ADP-ribosylation factor-like 15                  | ARL15   | 0.933457 | 191.5   |
| ENSGALT0000 ADP-ribosylation factor-like 16                  | ARL16   | 0.97415  | 219     |
| ENSGALT0000 ADP-ribosylation factor-like 2 binding           | ARL2BP  | 0.988111 | 375.5   |
| ENSGALT0000 ADP-ribosylation factor-like 3                   | ARL3    | 0.946676 | 886     |
| ENSGALT0000 ADP-ribosylation factor-like 4A                  | ARL4A   | 0.978905 | 910     |
| ENSGALT0000 ADP-ribosylation factor-like 5B                  | ARL5B   | 0.984232 | 703     |
| ENSGALT0000 ADP-ribosylation factor-like 6 interacting       | ARL6IP1 | 0.640893 | 5202.5  |
| ENSGALT0000 ADP-ribosylation-like factor 6 interacting       | ARL6IP4 | 0.873119 | 999.5   |
| ENSGALT0000 PRA1 family protein 3                            | ARL6IP5 | 0.871636 | 3072.5  |
| ENSGALT0000 ADP-ribosylation factor-like 8A                  | ARL8A   | 0.806816 | 1517    |
| ENSGALT0000 ADP-ribosylation factor-like 8B                  | ARL8B   | 0.84906  | 748.358 |
| ENSGALT0000 ADP-ribosylation factor-like 9                   | ARL9    | 0.924396 | 220.5   |
| ENSGALT0000 armadillo repeat containing 1                    | ARMC1   | 0.94819  | 1007    |
| ENSGALT0000 armadillo repeat containing 10                   | ARMC10  | 0.938711 | 57      |
| ENSGALT0000 armadillo repeat containing 2                    | ARMC2   | 0.984481 | 235.5   |
| ENSGALT0000 armadillo repeat containing 3                    | ARMC3   | 0.966118 | 67      |
| ENSGALT0000 armadillo repeat containing 4                    | ARMC4   | 0.899036 | 39.5    |
| ENSGALT0000 armadillo repeat containing 6                    | ARMC6   | 0.873378 | 2518    |
| ENSGALT0000 armadillo repeat containing 7                    | ARMC7   | 0.953818 | 807.5   |
| ENSGALT0000 armadillo repeat containing 8                    | ARMC8   | 0.971393 | 769     |
| ENSGALT0000 armadillo repeat containing 9                    | ARMC9   | 0.998715 | 589.5   |
| ENSGALT0000 aryl hydrocarbon receptor nuclear translocator   | ARNT    | 0.927604 | 5987    |
| ENSGALT0000 aryl-hydrocarbon receptor nuclear translocator 2 | ARNT2   | 0.979174 | 1705.95 |
| ENSGALT0000 aryl hydrocarbon receptor nuclear translocator   | ARNTL   | 0.981971 | 888.995 |
| ENSGALT0000 aryl hydrocarbon receptor nuclear translocator 2 | ARNTL2  | 0.991081 | 1101.01 |
| ENSGALT0000 actin related protein 2/3 complex, subunit A     | ARPC1A  | 0.837472 | 3387.11 |
| ENSGALT0000 actin related protein 2/3 complex, subunit B     | ARPC1B  | 0.540076 | 332     |
| ENSGALT0000 actin related protein 2/3 complex, subunit C     | ARPC2   | 0.797853 | 4746.72 |
| ENSGALT0000 actin related protein 2/3 complex, subunit D     | ARPC3   | 0.580074 | 2526.5  |
| ENSGALT0000 actin related protein 2/3 complex, subunit E     | ARPC4   | 0.425881 | 3009    |
| ENSGALT0000 actin related protein 2/3 complex, subunit F     | ARPC5   | 0.801566 | 3698.48 |
| ENSGALT0000 cAMP-regulated phosphoprotein, 1                 | ARPP19  | 0.98498  | 2202.48 |
| ENSGALT0000 cAMP-regulated phosphoprotein, 2                 | ARPP21  | 0.805768 | 506     |
| ENSGALT0000 arrestin 3, retinal                              | ARR3    | 0.960907 | 5.64893 |
| ENSGALT0000 arrestin domain containing 1                     | ARRDC1  | 0.961033 | 2609    |
| ENSGALT0000 arrestin domain containing 2                     | ARRDC2  | 0.966424 | 457     |
| ENSGALT0000 arrestin domain containing 3                     | ARRDC3  | 0.970851 | 745.5   |
| ENSGALT0000 arrestin domain containing 4                     | ARRDC4  | 0.898715 | 166.5   |
| ENSGALT0000 arylsulfatase A                                  | ARSA    | 0.930528 | 905.5   |
| ENSGALT0000 arylsulfatase B                                  | ARSB    | 0.983688 | 264.5   |
| ENSGALT0000 arylsulfatase D                                  | ARSD    | 0.98458  | 22.6182 |
| ENSGALT0000 arylsulfatase G                                  | ARSG    | 0.990743 | 237     |
| ENSGALT0000 arylsulfatase family, member H                   | ARSH    | 0.948285 | 348.686 |
| ENSGALT0000 arylsulfatase family, member I                   | ARSI    | 0.98862  | 3131    |
| ENSGALT0000 arylsulfatase family, member J                   | ARSJ    | 0.977834 | 124.5   |
| ENSGALT0000 arylsulfatase family, member K                   | ARSK    | 0.99579  | 279     |
| ENSGALT0000 ADP-ribosyltransferase 1                         | ART1    | 0.464758 | 0       |
| ENSGALT0000 ADP-ribosyltransferase 3                         | ART3    | 0.22129  | 0.5     |
| ENSGALT0000 ADP-ribosyltransferase 4 (Dombrock)              | ART4    | 0.649519 | 0       |
| ENSGALT0000 ARV1 homolog (S. cerevisiae)                     | ARV1    | 0.930395 | 82.5    |
| ENSGALT0000 armadillo repeat gene deleted in vertebrates     | ARVCF   | 0.995831 | 5796.45 |
| ENSGALT0000 arsenic (+3 oxidation state) methyltransferase   | AS3MT   | 0.766233 | 165.5   |
| ENSGALT0000 N-acylsphingosine amidohydrolase                 | ASAH1   | 0.995845 | 1788    |
| ENSGALT0000 N-acylsphingosine amidohydrolase                 | ASAH2   | 0.934491 | 4.5     |

|                                                   |            |           |          |   |
|---------------------------------------------------|------------|-----------|----------|---|
| ENSGALT0000 ArfGAP with SH3 domain, ankyrin r     | ASAP1      | 0.95681   | 696.5    |   |
| ENSGALT0000 ArfGAP with SH3 domain, ankyrin r     | ASAP2      | 0.992482  | 1369     |   |
| ENSGALT0000 ankyrin repeat and SOCS box cont      | ASB1       | 0.839453  | 636.5    |   |
| ENSGALT0000 ankyrin repeat and SOCS box cont      | ASB10      | 0.631223  | 1.5      |   |
| ENSGALT0000 ankyrin repeat and SOCS box cont      | ASB11      | 0.603682  | 0        |   |
| ENSGALT0000 ankyrin repeat and SOCS box cont      | ASB12      | 0.986063  | 10.5     |   |
| ENSGALT0000 ankyrin repeat and SOCS box cont      | ASB13      | 0.965592  | 151      |   |
| ENSGALT0000 ankyrin repeat and SOCS box cont      | ASB14      | 0.984636  | 107.5    |   |
| ENSGALT0000 ankyrin repeat and SOCS box cont      | ASB15      | 0.94691   | 1.5      |   |
| ENSGALT0000 ankyrin repeat and SOCS box cont      | ASB18      | 0.464758  | 0        |   |
| ENSGALT0000 ankyrin repeat and SOCS box cont      | ASB2       | 0.3318    | 1        |   |
| ENSGALT0000 ankyrin repeat and SOCS box-cont      | ASB3       | 0.986825  | 766.668  |   |
| ENSGALT0000 ankyrin repeat and SOCS box cont      | ASB4       | 0.0539949 | 0        |   |
| ENSGALT0000 ankyrin repeat and SOCS box cont      | ASB5       | 0.898649  | 256.5    |   |
| ENSGALT0000 ankyrin repeat and SOCS box cont      | ASB6       | 0.972855  | 1714.5   |   |
| ENSGALT0000 ankyrin repeat and SOCS box cont      | ASB7       | 0.919458  | 332      |   |
| ENSGALT0000 ankyrin repeat and SOCS box-cont      | ASB8       | 0.880033  | 1264.5   |   |
| ENSGALT0000 ankyrin repeat and SOCS box cont      | ASB9       | 0.778717  | 600.5    |   |
| ENSGALT0000 activating signal cointegrator 1 corr | ASCC1      | 0.754927  | 1141     |   |
| ENSGALT0000 activating signal cointegrator 1 corr | ASCC2      | 0.984243  | 1402.5   |   |
| ENSGALT0000 activating signal cointegrator 1 corr | ASCC3      | 0.950647  | 1048     |   |
| ENSGALT0000 achaete-scute complex homolog 2       | ASCL2      | 0.860985  | 47       |   |
| ENSGALT0000 achaete-scute complex homolog 3       | ASCL3      | 0.972735  | 8        |   |
| ENSGALT0000 achaete-scute complex homolog 4       | ASCL4      | 0.649519  | 0.5      |   |
| ENSGALT0000 anti-silencing function 1             | ASF1A      | 0.932722  | 693.5    |   |
| ENSGALT0000 ash1 (absent, small, or homeotic)-li  | ASH1L      | 0.968725  | 4628     |   |
| ENSGALT0000 ash2 (absent, small, or homeotic)-li  | ASH2L      | 0.899334  | 2046     |   |
| ENSGALT0000 Agouti signaling protein              | Uncharacte | ASIP      | 0.604874 | 6 |
| ENSGALT0000 argininosuccinate lyase               | ASL1       | 0.971942  | 75.7413  |   |
| ENSGALT0000 argininosuccinate lyase               | ASL2       | 0.898101  | 210.259  |   |
| ENSGALT0000 acetylserotonin O-methyltransferas    | ASMT       | 0.853815  | 0.5      |   |
| ENSGALT0000 acetylserotonin O-methyltransferas    | ASMTL      | 0.887683  | 537.5    |   |
| ENSGALT0000 asparagine synthetase (glutamine-l    | ASNS       | 0.800804  | 831      |   |
| ENSGALT0000 asparagine synthetase domain con      | ASNSD1     | 0.952782  | 678      |   |
| ENSGALT0000 aspartoacylase                        | ASPA       | 0.649519  | 5        |   |
| ENSGALT0000 asparaginase homolog (S. cerevisi     | ASPG       | 0.567615  | 200      |   |
| ENSGALT0000 aspartate beta-hydroxylase            | ASPH       | 0.989118  | 993.999  |   |
| ENSGALT0000 aspartate beta-hydroxylase domain     | ASPHD2     | 0.676127  | 37.5     |   |
| ENSGALT0000 asp (abnormal spindle) homolog, r     | ASPM       | 0.922312  | 1421     |   |
| ENSGALT0000 asporin                               | ASPN       | 0.745562  | 6        |   |
| ENSGALT0000 alveolar soft part sarcoma chromos    | ASPSCR1    | 0.98398   | 1905.5   |   |
| ENSGALT0000 asparaginase like 1                   | ASRGL1     | 0.833793  | 404.5    |   |
| ENSGALT0000 argininosuccinate synthase 1          | ASS1       | 0.228145  | 38       |   |
| ENSGALT0000 asteroid homolog 1 (Drosophila)       | ASTE1      | 0.994445  | 276.5    |   |
| ENSGALT0000 astacin-like metallo-endopeptidase    | ASTL       | 0.643623  | 4        |   |
| ENSGALT0000 astrotactin 1                         | ASTN1      | 0.807557  | 1436.48  |   |
| ENSGALT0000 astrotactin 2                         | ASTN2      | 0.732806  | 1796     |   |
| ENSGALT0000 additional sex combs like 1 (Droso    | ASXL1      | 0.976259  | 1625.5   |   |
| ENSGALT0000 additional sex combs like 2 (Droso    | ASXL2      | 0.967808  | 661.006  |   |
| ENSGALT0000 additional sex combs like 3 (Droso    | ASXL3      | 0.952733  | 709      |   |
| ENSGALT0000 ankyrin repeat, SAM and basic leuc    | ASZ1       | 1         | 0.5      |   |
| ENSGALT0000 ATPase family, AAA domain contair     | ATAD1      | 0.903831  | 1361.5   |   |
| ENSGALT0000 ATPase family, AAA domain contair     | ATAD2      | 0.982701  | 764      |   |
| ENSGALT0000 ATPase family, AAA domain contair     | ATAD3A     | 0.858414  | 1909.5   |   |
| ENSGALT0000 ATPase family, AAA domain contair     | ATAD5      | 0.961887  | 423.999  |   |
| ENSGALT0000 ataxia, cerebellar, Cayman type       | ATCAY      | 0.786768  | 585.5    |   |

|                                                                        |         |          |         |
|------------------------------------------------------------------------|---------|----------|---------|
| ENSGALT0000 arginyltransferase 1                                       | ATE1    | 0.9642   | 984.996 |
| ENSGALT0000 activating transcription factor 1                          | ATF1    | 0.950569 | 2216    |
| ENSGALT0000 activating transcription factor 2                          | ATF2    | 0.924183 | 1301.5  |
| ENSGALT0000 activating transcription factor 3                          | ATF3    | 0.710612 | 15      |
| ENSGALT0000 activating transcription factor 4 (tax                     | ATF4    | 0.937319 | 8280.67 |
| ENSGALT0000 activating transcription factor 6                          | ATF6    | 0.955685 | 914.495 |
| ENSGALT0000 activating transcription factor 7                          | ATF7    | 0.920159 | 524.5   |
| ENSGALT0000 activating transcription factor 7 inte                     | ATF7IP  | 0.984405 | 2309.5  |
| ENSGALT0000 ATG10 autophagy related 10 homo                            | ATG10   | 0.871555 | 125.5   |
| ENSGALT0000 ATG12 autophagy related 12 homo                            | ATG12   | 0.559975 | 876.5   |
| ENSGALT0000 ATG13 autophagy related 13 homo                            | ATG13   | 0.993882 | 1977    |
| ENSGALT0000 ATG14 autophagy related 14 homo                            | ATG14   | 0.887468 | 281.5   |
| ENSGALT0000 ATG16 autophagy related 16-like 1                          | ATG16L1 | 0.925258 | 1112.5  |
| ENSGALT0000 ATG2 autophagy related 2 homoloç                           | ATG2B   | 0.975202 | 1279    |
| ENSGALT0000 ATG3 autophagy related 3 homoloç                           | ATG3    | 0.840021 | 1059    |
| ENSGALT0000 ATG4 autophagy related 4 homoloç                           | ATG4A   | 0.980203 | 601     |
| ENSGALT0000 ATG4 autophagy related 4 homoloç                           | ATG4B   | 0.943533 | 1791    |
| ENSGALT0000 ATG4 autophagy related 4 homoloç                           | ATG4C   | 0.983166 | 465.5   |
| ENSGALT0000 ATG5 autophagy related 5 homoloç                           | ATG5    | 0.990821 | 720.5   |
| ENSGALT0000 ATG7 autophagy related 7 homoloç                           | ATG7    | 0.900637 | 299.501 |
| ENSGALT0000 ATG9 autophagy related 9 homoloç                           | ATG9A   | 0.940423 | 1732.47 |
| ENSGALT0000 ATH1, acid trehalase-like 1 (yeast)                        | ATHL1   | 0.985156 | 554.5   |
| ENSGALT0000 5-aminoimidazole-4-carboxamide ri                          | ATIC    | 0.976383 | 7089    |
| ENSGALT0000 atlastin GTPase 1                                          | ATL1    | 0.850147 | 1229    |
| ENSGALT0000 atlastin GTPase 2                                          | ATL2    | 0.939894 | 1069    |
| ENSGALT0000 ataxia telangiectasia mutated                              | ATM     | 0.982967 | 1217    |
| ENSGALT0000 ATM interactor                                             | ATMIN   | 0.994492 | 377.5   |
| ENSGALT0000 atrophin 1                                                 | ATN1    | 0.969697 | 9632    |
| ENSGALT0000 atonal homolog 1 (Drosophila)                              | ATOH1   | 0.5451   | 511.497 |
| ENSGALT0000 atonal homolog 7 (Drosophila)                              | ATOH7   | 0.871074 | 1.5     |
| ENSGALT0000 atonal homolog 8 (Drosophila)                              | ATOH8   | 0.956307 | 197     |
| ENSGALT0000 ATX1 antioxidant protein 1 homoloç                         | ATOX1   | 0.783268 | 2055    |
| ENSGALT0000 ATPase, class V, type 10A                                  | ATP10A  | 0.856802 | 662     |
| ENSGALT0000 ATPase, class V, type 10B                                  | ATP10B  | 0.674028 | 1.5     |
| ENSGALT0000 ATPase, class V, type 10D                                  | ATP10D  | 0.905355 | 632.003 |
| ENSGALT0000 ATPase, class VI, type 11A                                 | ATP11A  | 0.985769 | 1099.99 |
| ENSGALT0000 ATPase, class VI, type 11B                                 | ATP11B  | 0.977352 | 2393.98 |
| ENSGALT0000 ATPase, class VI, type 11C                                 | ATP11C  | 0.954212 | 2921.05 |
| ENSGALT0000 ATPase, H <sup>+</sup> /K <sup>+</sup> transporting, nongr | ATP12A  | 0.940973 | 6.5     |
| ENSGALT0000 ATPase type 13A1                                           | ATP13A1 | 0.973782 | 3689.22 |
| ENSGALT0000 ATPase type 13A2                                           | ATP13A2 | 0.996808 | 1517.05 |
| ENSGALT0000 ATPase type 13A3                                           | ATP13A3 | 0.982089 | 2629.5  |
| ENSGALT0000 ATPase type 13A4                                           | ATP13A4 | 0.918731 | 73.2095 |
| ENSGALT0000 ATPase type 13A5                                           | ATP13A5 | 0.839184 | 15.2905 |
| ENSGALT0000 ATPase, Na <sup>+</sup> /K <sup>+</sup> transporting, alph | ATP1A1  | 0.815897 | 9513.46 |
| ENSGALT0000 ATPase, Na <sup>+</sup> /K <sup>+</sup> transporting, beta | ATP1B1  | 0.556823 | 1755.49 |
| ENSGALT0000 ATPase, Na <sup>+</sup> /K <sup>+</sup> transporting, beta | ATP1B3  | 0.91735  | 2594.5  |
| ENSGALT0000 ATPase, Na <sup>+</sup> /K <sup>+</sup> transporting, beta | ATP1B4  | 0.863154 | 12.5    |
| ENSGALT0000 ATPase, Ca <sup>++</sup> transporting, cardia              | ATP2A2  | 0.949802 | 5279.27 |
| ENSGALT0000 ATPase, Ca <sup>++</sup> transporting, ubiquit             | ATP2A3  | 0.801933 | 141.5   |
| ENSGALT0000 ATPase, Ca <sup>++</sup> transporting, plasm               | ATP2B1  | 0.998767 | 2356.54 |
| ENSGALT0000 ATPase, Ca <sup>++</sup> transporting, plasm               | ATP2B2  | 0.85904  | 447     |
| ENSGALT0000 ATPase, Ca <sup>++</sup> transporting, plasm               | ATP2B4  | 0.973299 | 5444.18 |
| ENSGALT0000 ATPase, Ca <sup>++</sup> transporting, type 2              | ATP2C1  | 0.99909  | 4003.5  |
| ENSGALT0000 ATPase, H <sup>+</sup> /K <sup>+</sup> exchanging, beta p  | ATP4B   | 0.649519 | 0.5     |
| ENSGALT0000 ATP synthase, H <sup>+</sup> transporting, mit             | ATP5A1  | 0.361547 | 15402.3 |

|                                                          |            |           |         |
|----------------------------------------------------------|------------|-----------|---------|
| ENSGALT0000 ATP synthase, H+ transporting, mit           | ATP5C1     | 0.843614  | 4389.89 |
| ENSGALT0000 ATP synthase, H+ transporting, mit           | ATP5E      | 0.0977609 | 2857.5  |
| ENSGALT0000 ATP synthase, H+ transporting, mit           | ATP5F1     | 0.71696   | 6111.5  |
| ENSGALT0000 ATP synthase, H+ transporting, mit           | ATP5G1     | 0.252466  | 4296    |
| ENSGALT0000 ATP synthase, H+ transporting, mit           | ATP5G3     | 0.289884  | 5929    |
| ENSGALT0000 ATP synthase, H+ transporting, mit           | ATP5H      | 0.246258  | 4693.5  |
| ENSGALT0000 ATP synthase, H+ transporting, mit           | ATP5I      | 0.356308  | 4406.5  |
| ENSGALT0000 ATP synthase, H+ transporting, mit           | ATP5J      | 0.812728  | 3485.5  |
| ENSGALT0000 ATP synthase, H+ transporting, mit           | ATP5J2     | 0.0568487 | 3272.5  |
| ENSGALT0000 ATP synthase, H+ transporting, mit           | ATP5O      | 0.449229  | 5368    |
| ENSGALT0000 ATP synthase, H+ transporting, mit           | ATP5S      | 0.659042  | 340.5   |
| ENSGALT0000 ATP synthase subunit a                       | ATP6_CHICK | 0.916603  | 106043  |
| ENSGALT0000 ATPase, H+ transporting, lysosomal           | ATP6AP1L   | 0.516854  | 14      |
| ENSGALT0000 ATPase, H+ transporting, lysosomal           | ATP6AP2    | 0.861939  | 2378    |
| ENSGALT0000 ATPase, H+ transporting, lysosomal           | ATP6V0A1   | 0.892114  | 2252.49 |
| ENSGALT0000 ATPase, H+ transporting, lysosomal           | ATP6V0A2   | 0.987397  | 1611.5  |
| ENSGALT0000 ATPase, H+ transporting, lysosomal           | ATP6V0A4   | 0.632878  | 75.5    |
| ENSGALT0000 ATPase, H+ transporting, lysosomal           | ATP6V0C    | 0.806032  | 4431.5  |
| ENSGALT0000 ATPase, H+ transporting, lysosomal           | ATP6V0D1   | 0.69101   | 3664.5  |
| ENSGALT0000 ATPase, H+ transporting, lysosomal           | ATP6V0D2   | 0.649519  | 0.5     |
| ENSGALT0000 ATPase, H+ transporting, lysosomal           | ATP6V0E1   | 0.868602  | 1039    |
| ENSGALT0000 ATPase, H+ transporting V0 subun             | ATP6V0E2   | 0.119185  | 982.5   |
| ENSGALT0000 ATPase, H+ transporting, lysosomal           | ATP6V1A    | 0.937487  | 2062.53 |
| ENSGALT0000 ATPase, H+ transporting, lysosomal           | ATP6V1B2   | 0.82773   | 3543    |
| ENSGALT0000 ATPase, H+ transporting, lysosomal           | ATP6V1C1   | 0.916778  | 682.17  |
| ENSGALT0000 ATPase, H+ transporting, lysosomal           | ATP6V1C2   | 0.61487   | 28      |
| ENSGALT0000 ATPase, H+ transporting, lysosomal           | ATP6V1D    | 0.695686  | 1456    |
| ENSGALT0000 ATPase, H+ transporting, lysosomal           | ATP6V1E1   | 0.721387  | 1571    |
| ENSGALT0000 ATPase, H+ transporting, lysosomal           | ATP6V1G1   | 0.617576  | 3293    |
| ENSGALT0000 ATPase, H+ transporting, lysosomal           | ATP6V1G3   | 0.464758  | 0       |
| ENSGALT0000 ATPase, Cu <sup>++</sup> transporting, alpha | ATP7A      | 0.996548  | 1642.53 |
| ENSGALT0000 ATPase, Cu <sup>++</sup> transporting, beta  | ATP7B      | 0.748846  | 34      |
| ENSGALT0000 ATP synthase protein 8                       | ATP8       | 0.97482   | 11203   |
| ENSGALT0000 ATPase, aminophospholipid transp             | ATP8A1     | 0.869212  | 538.5   |
| ENSGALT0000 ATPase, aminophospholipid transp             | ATP8A2     | 0.712408  | 806.5   |
| ENSGALT0000 ATPase, aminophospholipid transp             | ATP8B1     | 0.994395  | 1204.5  |
| ENSGALT0000 ATPase, class I, type 8B, member             | ATP8B2     | 0.951796  | 1482.5  |
| ENSGALT0000 ATPase, aminophospholipid transp             | ATP8B3     | 0.997696  | 53      |
| ENSGALT0000 ATPase, class II, type 9A                    | ATP9A      | 0.944869  | 1036    |
| ENSGALT0000 ATPase, class II, type 9B                    | ATP9B      | 0.978107  | 1643.5  |
| ENSGALT0000 ATP synthase mitochondrial F1 cor            | ATPAF1     | 0.859206  | 714.5   |
| ENSGALT0000 ATP synthase mitochondrial F1 cor            | ATPAF2     | 0.729558  | 625     |
| ENSGALT0000 ATP synthase subunit beta, mitoch            | ATPB_CHICK | 0.625505  | 11203   |
| ENSGALT0000 ATP binding domain 4                         | ATPBD4     | 0.966009  | 155     |
| ENSGALT0000 ATPase inhibitory factor 1                   | ATPIF1     | 0.535102  | 378.5   |
| ENSGALT0000 ataxia telangiectasia and Rad3 rela          | ATR        | 0.981827  | 1259.5  |
| ENSGALT0000 ATR interacting protein                      | ATRIP      | 0.971181  | 967.5   |
| ENSGALT0000 attractin                                    | ATRNL      | 0.991342  | 2860.5  |
| ENSGALT0000 attractin-like 1                             | ATRNL1     | 0.879029  | 1043.5  |
| ENSGALT0000 alpha thalassemia/mental retardati           | ATRX       | 0.959945  | 3628    |
| ENSGALT0000 ataxin 1                                     | ATXN1      | 0.854206  | 279.5   |
| ENSGALT0000 ataxin 10                                    | ATXN10     | 0.959525  | 467     |
| ENSGALT0000 ataxin 2                                     | ATXN2      | 0.953149  | 3420.5  |
| ENSGALT0000 ataxin 3                                     | ATXN3      | 0.863441  | 2855.02 |
| ENSGALT0000 ataxin 7                                     | ATXN7      | 0.97444   | 365.999 |
| ENSGALT0000 ataxin 7-like 1                              | ATXN7L1    | 0.969974  | 374     |

|                                                  |              |          |         |
|--------------------------------------------------|--------------|----------|---------|
| ENSGALT0000 AU RNA binding protein/enoyl-CoA AUH |              | 0.769457 | 394.5   |
| ENSGALT0000 ancient ubiquitous protein 1         | AUP1         | 0.911353 | 2264    |
| ENSGALT0000 aurora kinase A                      | AURKA        | 0.866184 | 641.5   |
| ENSGALT0000 aurora kinase A interacting protein  | AURKAIP1     | 0.803347 | 709     |
| ENSGALT0000 autism susceptibility candidate 2    | AUTS2        | 0.988586 | 9659    |
| ENSGALT0000 apoptosis, caspase activation inhib  | AVEN         | 0.80994  | 718.5   |
| ENSGALT0000 AVL9 homolog (S. cerevisiae)         | AVL9         | 0.967503 | 883.5   |
| ENSGALT0000 arginine vasopressin (neurophysin    | AVP          | 0.562993 | 1.5     |
| ENSGALT0000 arginine vasopressin receptor 1B     | AVPR1B       | 0.164317 | 1       |
| ENSGALT0000 arginine vasopressin receptor 2      | AVPR2        | 0.562993 | 1.5     |
| ENSGALT0000 axonemal dynein light chain domain   | AXDND1       | 0.19245  | 0.5     |
| ENSGALT0000 axin 1                               | AXIN1        | 0.994546 | 1376.99 |
| ENSGALT0000 axin 2                               | AXIN2        | 0.980289 | 1537    |
| ENSGALT0000 5-azacytidine induced 1              | AZI1         | 0.863427 | 2865    |
| ENSGALT0000 5-azacytidine induced 2              | AZI2         | 0.939559 | 788     |
| ENSGALT0000 antizyme inhibitor 1                 | AZIN1        | 0.894613 | 3700.92 |
| ENSGALT0000 beta-2-microglobulin                 | B2M          | 0.961316 | 1113.5  |
| ENSGALT0000 beta-1,3-N-acetylgalactosaminyltra   | B3GALNT1     | 0.99409  | 91      |
| ENSGALT0000 UDP-Gal:betaGlcNAc beta 1,3-galact   | B3GALT1      | 0.916308 | 144.5   |
| ENSGALT0000 UDP-Gal:betaGlcNAc beta 1,3-galact   | B3GALT2      | 0.711483 | 59      |
| ENSGALT0000 UDP-Gal:betaGlcNAc beta 1,3-galact   | B3GALT4      | 0.650635 | 16      |
| ENSGALT0000 UDP-Gal:betaGlcNAc beta 1,3-galact   | B3GALT5      | 0.980128 | 23.5    |
| ENSGALT0000 UDP-Gal:betaGal beta 1,3-galactos    | B3GALT6      | 0.925499 | 387     |
| ENSGALT0000 beta 1,3-galactosyltransferase-like  | B3GALTL      | 0.990117 | 920     |
| ENSGALT0000 beta-1,3-glucuronyltransferase 1 (g  | B3GAT1       | 0.81948  | 477     |
| ENSGALT0000 beta-1,3-glucuronyltransferase 2 (g  | B3GAT2       | 0.737455 | 8021.26 |
| ENSGALT0000 UDP-GlcNAc:betaGal beta-1,3-N-a      | B3GNT2       | 0.991325 | 430.5   |
| ENSGALT0000 UDP-GlcNAc:betaGal beta-1,3-N-a      | B3GNT5       | 0.947505 | 293.5   |
| ENSGALT0000 UDP-GlcNAc:betaGal beta-1,3-N-a      | B3GNT7       | 0.945476 | 390     |
| ENSGALT0000 UDP-GlcNAc:betaGal beta-1,3-N-a      | B3GNT9       | 0.864242 | 185     |
| ENSGALT0000 UDP-GlcNAc:betaGal beta-1,3-N-a      | B3GNTL1      | 0.897533 | 108.987 |
| ENSGALT0000 Uncharacterized protein              | B3VE14_CHICK | 0.864572 | 22      |
| ENSGALT0000 beta-1,4-N-acetyl-galactosaminyl tr  | B4GALNT3     | 0.903561 | 342.5   |
| ENSGALT0000 beta-1,4-N-acetyl-galactosaminyl tr  | B4GALNT4     | 0.942542 | 9350.5  |
| ENSGALT0000 UDP-Gal:betaGlcNAc beta 1,4- gal     | B4GALT1      | 0.889124 | 232.5   |
| ENSGALT0000 UDP-Gal:betaGlcNAc beta 1,4- gal     | B4GALT2      | 0.944104 | 7186.71 |
| ENSGALT0000 UDP-Gal:betaGlcNAc beta 1,4- gal     | B4GALT3      | 0.977876 | 649     |
| ENSGALT0000 UDP-Gal:betaGlcNAc beta 1,4- gal     | B4GALT4      | 0.980087 | 1957    |
| ENSGALT0000 UDP-Gal:betaGlcNAc beta 1,4- gal     | B4GALT5      | 0.92358  | 813     |
| ENSGALT0000 UDP-Gal:betaGlcNAc beta 1,4- gal     | B4GALT6      | 0.998777 | 692.496 |
| ENSGALT0000 xylosylprotein beta 1,4-galactosyltr | B4GALT7      | 0.827732 | 1270.51 |
| ENSGALT0000 B9 protein domain 1                  | B9D1         | 0.945413 | 348.5   |
| ENSGALT0000 Uncharacterized protein              | B9VGZ4_CHICK | 0.924356 | 51      |
| ENSGALT0000 brain and acute leukemia, cytoplas   | BAALC        | 0.859064 | 11      |
| ENSGALT0000 beta-site APP-cleaving enzyme 1      | BACE1        | 0.950626 | 1626    |
| ENSGALT0000 beta-site APP-cleaving enzyme 2      | BACE2        | 0.979467 | 809.51  |
| ENSGALT0000 BTB and CNC homology 1, basic le     | BACH1        | 0.981396 | 1233    |
| ENSGALT0000 BCL2-associated athanogene           | BAG1         | 0.970241 | 187.5   |
| ENSGALT0000 BCL2-associated athanogene 2         | BAG2         | 0.815871 | 640.5   |
| ENSGALT0000 BCL2-associated athanogene 4         | BAG4         | 0.854972 | 640.285 |
| ENSGALT0000 BCL2-associated athanogene 5         | BAG5         | 0.997111 | 874.5   |
| ENSGALT0000 BAH domain and coiled-coil contain   | BAHCC1       | 0.955614 | 771     |
| ENSGALT0000 bromo adjacent homology domain       | BAHD1        | 0.997961 | 1367    |
| ENSGALT0000 brain-specific angiogenesis inhibito | BAI1         | 0.760941 | 713     |
| ENSGALT0000 brain-specific angiogenesis inhibito | BAI2         | 0.756923 | 34.5    |
| ENSGALT0000 brain-specific angiogenesis inhibito | BAI3         | 0.949496 | 400     |



|                                                       |          |          |         |
|-------------------------------------------------------|----------|----------|---------|
| ENSGALT0000 BAI1-associated protein 2                 | BAIAP2   | 0.943447 | 983.5   |
| ENSGALT0000 BAI1-associated protein 2-like 1          | BAIAP2L1 | 0.996599 | 560.5   |
| ENSGALT0000 BAI1-associated protein 2-like 2          | BAIAP2L2 | 0.425891 | 91.5    |
| ENSGALT0000 BCL2-antagonist/killer 1                  | BAK1     | 0.883717 | 1994.46 |
| ENSGALT0000 BMP and activin membrane-bound            | BAMBI    | 0.613465 | 4160    |
| ENSGALT0000 barrier to autointegration factor 1       | BANF1    | 0.354617 | 1185.5  |
| ENSGALT0000 BTG3 associated nuclear protein           | BANP     | 0.927258 | 491     |
| ENSGALT0000 BRCA1 associated protein-1 (ubiquitin)    | BAP1     | 0.943471 | 4585.5  |
| ENSGALT0000 BRCA1 associated RING domain 1            | BARD1    | 0.948007 | 471.5   |
| ENSGALT0000 BARX homeobox 1                           | BARX1    | 0.889097 | 8.5     |
| ENSGALT0000 BARX homeobox 2                           | BARX2    | 0.643314 | 87.5    |
| ENSGALT0000 brain abundant, membrane attached         | BASP1    | 0.607916 | 6410.38 |
| ENSGALT0000 basic leucine zipper transcription factor | BATF     | 0.816237 | 41.5    |
| ENSGALT0000 bromodomain adjacent to zinc finger       | BAZ1A    | 0.964276 | 1255    |
| ENSGALT0000 bromodomain adjacent to zinc finger       | BAZ1B    | 0.954308 | 5371.39 |
| ENSGALT0000 bromodomain adjacent to zinc finger       | BAZ2B    | 0.986323 | 2430.99 |
| ENSGALT0000 butyrobetaine (gamma), 2-oxoglutarate     | BBOX1    | 0.965174 | 824.5   |
| ENSGALT0000 Bardet-Biedl syndrome 10                  | BBS10    | 0.970669 | 574     |
| ENSGALT0000 Bardet-Biedl syndrome 12                  | BBS12    | 0.998827 | 170.5   |
| ENSGALT0000 Bardet-Biedl syndrome 2                   | BBS2     | 0.910686 | 942.49  |
| ENSGALT0000 Bardet-Biedl syndrome 4                   | BBS4     | 0.989172 | 1683    |
| ENSGALT0000 Bardet-Biedl syndrome 7                   | BBS7     | 0.995957 | 925.5   |
| ENSGALT0000 Bardet-Biedl syndrome 9                   | BBS9     | 0.991706 | 349.5   |
| ENSGALT0000 bobby sox homolog (Drosophila)            | BBX      | 0.996553 | 702.5   |
| ENSGALT0000 brevican                                  | BCAN     | 0.999115 | 83.5    |
| ENSGALT0000 B-cell receptor-associated protein 2      | BCAP29   | 0.909253 | 1507    |
| ENSGALT0000 breast cancer anti-estrogen resistance    | BCAR1    | 0.741033 | 715     |
| ENSGALT0000 breast cancer anti-estrogen resistance    | BCAR3    | 0.853672 | 202.5   |
| ENSGALT0000 breast carcinoma amplified sequence       | BCAS1    | 0.713196 | 99.9999 |
| ENSGALT0000 breast carcinoma amplified sequence       | BCAS2    | 0.161959 | 1843.5  |
| ENSGALT0000 breast carcinoma amplified sequence       | BCAS3    | 0.895197 | 1531.99 |
| ENSGALT0000 branched chain amino-acid transaminase    | BCAT1    | 0.80592  | 256     |
| ENSGALT0000 BRCA2 and CDKN1A interacting protein      | BCCIP    | 0.911148 | 888     |
| ENSGALT0000 BCDIN3 domain containing                  | BCDIN3D  | 0.791525 | 107.5   |
| ENSGALT0000 butyrylcholinesterase                     | BCHE     | 0.962334 | 593.499 |
| ENSGALT0000 branched chain keto acid dehydrogenase    | BCKDHB   | 0.863187 | 781.496 |
| ENSGALT0000 B-cell CLL/lymphoma 10                    | BCL10    | 0.993818 | 197     |
| ENSGALT0000 B-cell CLL/lymphoma 11A (zinc finger)     | BCL11A   | 0.99779  | 2765    |
| ENSGALT0000 B-cell CLL/lymphoma 11B (zinc finger)     | BCL11B   | 0.94144  | 303.5   |
| ENSGALT0000 B-cell CLL/lymphoma 2                     | BCL2     | 0.99517  | 652.007 |
| ENSGALT0000 BCL2-related protein A1                   | BCL2A1   | 0.709213 | 1       |
| ENSGALT0000 BCL2-like 1                               | BCL2L1   | 0.874267 | 2650.52 |
| ENSGALT0000 BCL2-like 13 (apoptosis facilitator)      | BCL2L13  | 0.97777  | 997.5   |
| ENSGALT0000 BCL2-like 14 (apoptosis facilitator)      | BCL2L14  | 0.517843 | 1       |
| ENSGALT0000 BCL2-like 15                              | BCL2L15  | 0.640686 | 48      |
| ENSGALT0000 B-cell CLL/lymphoma 6                     | BCL6     | 0.950833 | 426     |
| ENSGALT0000 B-cell CLL/lymphoma 7A                    | BCL7A    | 0.917699 | 953.5   |
| ENSGALT0000 B-cell CLL/lymphoma 9                     | BCL9     | 0.993937 | 4506.5  |
| ENSGALT0000 B-cell CLL/lymphoma 9-like                | BCL9L    | 0.959232 | 2194.5  |
| ENSGALT0000 BCL2-associated transcription factor      | BCLAF1   | 0.96251  | 4279    |
| ENSGALT0000 beta-carotene 15,15'-monooxygenase        | BCMO1    | 0.563624 | 116.5   |
| ENSGALT0000 beta-carotene oxygenase 2                 | BCO2     | 0.72277  | 168     |
| ENSGALT0000 BCL6 corepressor                          | BCOR     | 0.991409 | 2910.52 |
| ENSGALT0000 BCL6 corepressor-like 1                   | BCORL1   | 0.952259 | 717     |
| ENSGALT0000 breakpoint cluster region                 | BCR      | 0.961521 | 2447.03 |
| ENSGALT0000 BCS1-like (S. cerevisiae)                 | BCS1L    | 0.844921 | 917.999 |

|                                                   |         |          |         |
|---------------------------------------------------|---------|----------|---------|
| ENSGALT0000 3-hydroxybutyrate dehydrogenase, BDH1 |         | 0.664873 | 3059    |
| ENSGALT0000 3-hydroxybutyrate dehydrogenase, BDH2 |         | 0.925686 | 676     |
| ENSGALT0000 bradykinin receptor B1                | BDKRB1  | 0.107035 | 1       |
| ENSGALT0000 bradykinin receptor B2                | BDKRB2  | 0.657607 | 3.5     |
| ENSGALT0000 brain-derived neurotrophic factor     | BDNF    | 0.930127 | 212     |
| ENSGALT0000 B double prime 1, subunit of RNA p    | BDP1    | 0.949119 | 172.5   |
| ENSGALT0000 brain expressed, associated with N    | BEAN1   | 0.662932 | 760     |
| ENSGALT0000 beclin 1, autophagy related           | BECN1   | 0.910005 | 1091.48 |
| ENSGALT0000 brain-enriched guanylate kinase-as    | BEGAIN  | 0.919477 | 158.5   |
| ENSGALT0000 BEN domain containing 2               | BEND2   | 0.987106 | 185.5   |
| ENSGALT0000 BEN domain containing 3               | BEND3   | 0.959042 | 686     |
| ENSGALT0000 BEN domain containing 4               | BEND4   | 0.973951 | 300.5   |
| ENSGALT0000 BEN domain containing 5               | BEND5   | 0.745625 | 821     |
| ENSGALT0000 BEN domain containing 6               | BEND6   | 0.935507 | 68      |
| ENSGALT0000 BEN domain containing 7               | BEND7   | 0.982427 | 370     |
| ENSGALT0000 bestrophin 1                          | BEST1   | 0.984195 | 39.5    |
| ENSGALT0000 bestrophin 3                          | BEST3   | 0.872443 | 2       |
| ENSGALT0000 bestrophin 4                          | BEST4   | 0.766606 | 15.5    |
| ENSGALT0000 blocked early in transport 1 homolo   | BET1    | 0.717153 | 369     |
| ENSGALT0000 blocked early in transport 1 homolo   | BET1L   | 0.95294  | 1740.5  |
| ENSGALT0000 BET3 like (S. cerevisiae)             | BET3L   | 0.40159  | 75.5    |
| ENSGALT0000 MHC BF2 class I                       | BF2     | 0.447679 | 309.029 |
| ENSGALT0000 bifunctional apoptosis regulator      | BFAR    | 0.9822   | 377.5   |
| ENSGALT0000 beaded filament structural protein 1  | BFSP1   | 0.987743 | 5.5     |
| ENSGALT0000 beaded filament structural protein 2  | BFSP2   | 0.807892 | 11      |
| ENSGALT0000 MHC B-G antigen                       | B-G     | 0.999853 | 493.628 |
| ENSGALT0000 intestinal zipper protein             | BG2     | 0.999916 | 71.4683 |
| ENSGALT0000 basic helix-loop-helix family, memb   | BHLHA15 | 0.740073 | 2       |
| ENSGALT0000 basic helix-loop-helix family, memb   | BHLHE23 | 0.711819 | 31.5    |
| ENSGALT0000 basic helix-loop-helix family, memb   | BHLHE40 | 0.981663 | 324.5   |
| ENSGALT0000 betaine--homocysteine S-methyltra     | BHMT    | 0.931919 | 107     |
| ENSGALT0000 bicaudal C homolog 1 (Drosophila)     | BICC1   | 0.975595 | 438     |
| ENSGALT0000 bicaudal D homolog 1 (Drosophila)     | BICD1   | 0.84683  | 474.5   |
| ENSGALT0000 bicaudal D homolog 2 (Drosophila)     | BICD2   | 0.892452 | 2731    |
| ENSGALT0000 BH3 interacting domain death agor     | BID     | 0.620896 | 2266    |
| ENSGALT0000 BCL2-interacting killer (apoptosis-ir | BIK     | 0.87835  | 106.5   |
| ENSGALT0000 bridging integrator 1                 | BIN1    | 0.877462 | 1394.51 |
| ENSGALT0000 baculoviral IAP repeat containing 2   | BIRC2   | 0.993988 | 2352.51 |
| ENSGALT0000 baculoviral IAP repeat containing 5   | BIRC5   | 0.289791 | 1093    |
| ENSGALT0000 baculoviral IAP repeat containing 6   | BIRC6   | 0.967544 | 5212.5  |
| ENSGALT0000 baculoviral IAP repeat containing 7   | BIRC7   | 0.848698 | 15.5    |
| ENSGALT0000 basic, immunoglobulin-like variable   | BIVM    | 0.992694 | 1450.01 |
| ENSGALT0000 Beta-keratin-related protein          | BKJ     | 0.995932 | 7       |
| ENSGALT0000 MHC class II beta chain               | BLB2    | 0.295473 | 443.442 |
| ENSGALT0000 bladder cancer associated protein     | BLCAP   | 0.985591 | 845.5   |
| ENSGALT0000 B lymphoid tyrosine kinase            | BLK     | 0.01363  | 11.5    |
| ENSGALT0000 Bloom syndrome, RecQ helicase-lil     | BLM     | 0.927936 | 953.5   |
| ENSGALT0000 bleomycin hydrolase                   | BLMH    | 0.806712 | 3793.5  |
| ENSGALT0000 B-cell linker                         | BLNK    | 0.712076 | 71      |
| ENSGALT0000 biogenesis of lysosomal organelles    | BLOC1S2 | 0.835721 | 422.999 |
| ENSGALT0000 biogenesis of lysosomal organelles    | BLOC1S3 | 0.739498 | 1151.5  |
| ENSGALT0000 biliverdin reductase A                | BLVRA   | 0.925981 | 96      |
| ENSGALT0000 basic leucine zipper nuclear factor   | BLZF1   | 0.943997 | 599.5   |
| ENSGALT0000 B locus M alpha chain 1               | BMA1    | 0.835088 | 526.5   |
| ENSGALT0000 B locus M beta chain 2                | B-MA2   | 0.91222  | 661.5   |
| ENSGALT0000 Bcl2 modifying factor                 | BMF     | 0.999449 | 1010    |

|                                                  |        |          |         |
|--------------------------------------------------|--------|----------|---------|
| ENSGALT0000 bone morphogenetic protein 10        | BMP10  | ?        | 0       |
| ENSGALT0000 bone morphogenetic protein 15        | BMP15  | 0.689337 | 1       |
| ENSGALT0000 bone morphogenetic protein 2         | BMP2   | 0.877559 | 101     |
| ENSGALT0000 BMP2 inducible kinase                | BMP2K  | 0.940426 | 337     |
| ENSGALT0000 bone morphogenetic protein 3         | BMP3   | 0.517371 | 5       |
| ENSGALT0000 bone morphogenetic protein 4         | BMP4   | 0.915074 | 1657.97 |
| ENSGALT0000 bone morphogenetic protein 5         | BMP5   | 0.771807 | 340.5   |
| ENSGALT0000 bone morphogenetic protein 7         | BMP7   | 0.902811 | 3114.63 |
| ENSGALT0000 BMP binding endothelial regulator    | BMPER  | 0.689177 | 1010.5  |
| ENSGALT0000 bone morphogenetic protein recept    | BMPR1A | 0.990244 | 1291    |
| ENSGALT0000 bone morphogenetic protein recept    | BMPR1B | 0.641306 | 203.5   |
| ENSGALT0000 bone morphogenetic protein recept    | BMPR2  | 0.955346 | 1781.5  |
| ENSGALT0000 BMS1 homolog, ribosome assembl       | BMS1   | 0.937312 | 1695.5  |
| ENSGALT0000 BMX non-receptor tyrosine kinase     | BMX    | 0.522413 | 0       |
| ENSGALT0000 basonuclin 1                         | BNC1   | 0.780657 | 0.5     |
| ENSGALT0000 basonuclin 2                         | BNC2   | 0.721448 | 48.5    |
| ENSGALT0000 BCL2/adenovirus E1B 19kDa inter      | BNIP1  | 0.931008 | 392.494 |
| ENSGALT0000 BCL2/adenovirus E1B 19kDa inter      | BNIP2  | 0.959803 | 446     |
| ENSGALT0000 BCL2/adenovirus E1B 19kDa inter      | BNIP3  | 0.984375 | 1107    |
| ENSGALT0000 BCL2/adenovirus E1B 19kDa inter      | BNIP3L | 0.997405 | 6755.5  |
| ENSGALT0000 NK receptor-like                     | B-NK   | 0.829595 | 5.00304 |
| ENSGALT0000 Boc homolog (mouse)                  | BOC    | 0.857163 | 2022.5  |
| ENSGALT0000 biorientation of chromosomes in ce   | BOD1   | 0.901803 | 1239    |
| ENSGALT0000 BCL2-related ovarian killer          | BOK    | 0.841408 | 688.5   |
| ENSGALT0000 bol, boule-like (Drosophila)         | BOLL   | 0.994695 | 15      |
| ENSGALT0000 bora, aurora kinase A activator      | BORA   | 0.938597 | 387.5   |
| ENSGALT0000 2,3-bisphosphoglycerate mutase       | BPGM   | 0.923136 | 1653.5  |
| ENSGALT0000 biphenyl hydrolase-like (serine hyd  | BPHL   | 0.930441 | 230     |
| ENSGALT0000 bactericidal/permeability-increasing | BPI    | 0.707045 | 90.5    |
| ENSGALT0000 BPI fold containing family B, memb   | BPIFB3 | 0.391803 | 10      |
| ENSGALT0000 BPI fold containing family B, memb   | BPIFB4 | 0.639948 | 40      |
| ENSGALT0000 Ovocalyxin-36                        | BPIFB8 | 0.581157 | 8       |
| ENSGALT0000 bactericidal/permeability-increasing | BPIL3  | 0.476124 | 1       |
| ENSGALT0000 3'(2'), 5'-bisphosphate nucleotidase | BPNT1  | 0.94246  | 668     |
| ENSGALT0000 bromodomain PHD finger transcrip     | BPTF   | 0.97591  | 2791.04 |
| ENSGALT0000 v-raf murine sarcoma viral oncog     | BRAF   | 0.979129 | 470     |
| ENSGALT0000 BRCA1 associated protein             | BRAP   | 0.909889 | 954.502 |
| ENSGALT0000 BRCA1-associated ATM activator 1     | BRAT1  | 0.973974 | 723.5   |
| ENSGALT0000 breast cancer 1, early onset         | BRCA1  | 0.9528   | 1250    |
| ENSGALT0000 breast cancer 2, early onset         | BRCA2  | 0.972484 | 617.999 |
| ENSGALT0000 BRCA1/BRCA2-containing comple        | BRCC3  | 0.84827  | 890.5   |
| ENSGALT0000 bromodomain containing 1             | BRD1   | 0.993698 | 2077    |
| ENSGALT0000 bromodomain containing 2             | BRD2   | 0.942263 | 7056    |
| ENSGALT0000 bromodomain containing 3             | BRD3   | 0.981679 | 2539.46 |
| ENSGALT0000 bromodomain containing 4             | BRD4   | 0.981974 | 6004.84 |
| ENSGALT0000 bromodomain containing 7             | BRD7   | 0.918217 | 1890.97 |
| ENSGALT0000 bromodomain containing 8             | BRD8   | 0.949168 | 2336.55 |
| ENSGALT0000 bromodomain containing 9             | BRD9   | 0.929167 | 394.5   |
| ENSGALT0000 bromodomain, testis-specific         | BRDT   | 0.464758 | 0       |
| ENSGALT0000 brain and reproductive organ-expre   | BRE    | 0.975651 | 2700.5  |
| ENSGALT0000 BRF1 homolog, subunit of RNA pol     | BRF1   | 0.931567 | 522.5   |
| ENSGALT0000 BRF2, subunit of RNA polymerase      | BRF2   | 0.776665 | 326.5   |
| ENSGALT0000 brain protein I3                     | BRI3   | 0.746873 | 1063.5  |
| ENSGALT0000 BRI3 binding protein                 | BRI3BP | 0.922461 | 904     |
| ENSGALT0000 BRCA1 interacting protein C-termir   | BRIP1  | 0.806044 | 450.998 |
| ENSGALT0000 BRX1, biogenesis of ribosomes, hc    | BRIX1  | 0.945638 | 879.5   |

|                                                  |             |          |         |
|--------------------------------------------------|-------------|----------|---------|
| ENSGALT0000 breast cancer metastasis-suppress    | BRMS1L      | 0.932121 | 749.5   |
| ENSGALT0000 BRO1 domain and CAAX motif con       | BROX        | 0.97321  | 553.5   |
| ENSGALT0000 brain protein 44                     | BRP44       | 0.647303 | 391.999 |
| ENSGALT0000 brain protein 44-like                | BRP44L      | 0.565823 | 1411.5  |
| ENSGALT0000 bromodomain and PHD finger cont      | BRPF1       | 0.908934 | 1641.5  |
| ENSGALT0000 bromodomain and PHD finger cont      | BRPF3       | 0.993275 | 1588.5  |
| ENSGALT0000 bombesin-like receptor 3             | BRS3        | 0.649519 | 0       |
| ENSGALT0000 BR serine/threonine kinase 2         | BRSK2       | 0.831663 | 356     |
| ENSGALT0000 bruno-like 6, RNA binding protein (I | BRUNOL6     | 0.739873 | 753.993 |
| ENSGALT0000 bromodomain and WD repeat dom        | BRWD1       | 0.992069 | 1559.5  |
| ENSGALT0000 bromodomain and WD repeat dom        | BRWD3       | 0.990499 | 915.5   |
| ENSGALT0000 BSD domain containing 1              | BSDC1       | 0.929399 | 2192.5  |
| ENSGALT0000 basigin (Ok blood group)             | BSG         | 0.973675 | 14559.3 |
| ENSGALT0000 bassoon (presynaptic cytomatrix pr   | BSN         | 0.847675 | 1081    |
| ENSGALT0000 B-box and SPRY domain containin      | BSPRY       | 0.91028  | 231.5   |
| ENSGALT0000 bone marrow stromal cell antigen 1   | BST1        | 0.870738 | 44.5    |
| ENSGALT0000 brain-specific homeobox              | BSX         | 0.649519 | 1       |
| ENSGALT0000 BTAF1 RNA polymerase II, B-TFII      | BTAF1       | 0.988982 | 1943    |
| ENSGALT0000 BTB (POZ) domain containing 1        | BTBD1       | 0.90246  | 1492.88 |
| ENSGALT0000 BTB (POZ) domain containing 10       | BTBD10      | 0.690034 | 744     |
| ENSGALT0000 BTB (POZ) domain containing 11       | BTBD11      | 0.934046 | 390     |
| ENSGALT0000 BTB (POZ) domain containing 17       | BTBD17      | 0.661726 | 694     |
| ENSGALT0000 BTB (POZ) domain containing 2        | BTBD2       | 0.877688 | 1188.5  |
| ENSGALT0000 BTB (POZ) domain containing 3        | BTBD3       | 0.911234 | 649     |
| ENSGALT0000 BTB (POZ) domain containing 6        | BTBD6       | 0.869551 | 4123    |
| ENSGALT0000 BTB (POZ) domain containing 7        | BTBD7       | 0.986736 | 1676.5  |
| ENSGALT0000 BTB (POZ) domain containing 8        | BTBD8       | 0.915984 | 45.5    |
| ENSGALT0000 BTB (POZ) domain containing 9        | BTBD9       | 0.930572 | 1000.5  |
| ENSGALT0000 betacellulin                         | BTC         | 0.963321 | 5       |
| ENSGALT0000 biotinidase                          | BTD         | 0.939416 | 162     |
| ENSGALT0000 basic transcription factor 3-like 4  | BTF3L4      | 0.972179 | 5629    |
| ENSGALT0000 B-cell translocation gene 1, anti-pr | BTG1        | 0.940635 | 6998.5  |
| ENSGALT0000 BTG family, member 2                 | BTG2        | 0.961889 | 564.5   |
| ENSGALT0000 B-cell translocation gene 4          | BTG4        | 0.464758 | 0       |
| ENSGALT0000 Bruton agammaglobulinemia tyrosi     | BTK         | 0.897846 | 100.5   |
| ENSGALT0000 B and T lymphocyte associated        | BTLA        | 0.704629 | 1.5     |
| ENSGALT0000 butyrophilin, subfamily 1, member    | BTN1A1      | 0.895574 | 28.5    |
| ENSGALT0000 beta-transducin repeat containing    | BTRC        | 0.960768 | 1224.5  |
| ENSGALT0000 budding uninhibited by benzimidaz    | BUB1        | 0.903653 | 1568    |
| ENSGALT0000 budding uninhibited by benzimidaz    | BUB1B       | 0.916688 | 1644.49 |
| ENSGALT0000 BUB3 budding uninhibited by benzi    | BUB3        | 0.876154 | 3751.37 |
| ENSGALT0000 BUD13 homolog (S. cerevisiae)        | BUD13       | 0.937101 | 1217.6  |
| ENSGALT0000 BUD31 homolog (S. cerevisiae)        | BUD31       | 0.781506 | 2502    |
| ENSGALT0000 bystin-like                          | BYSL        | 0.675166 | 2106.02 |
| ENSGALT0000 basic leucine zipper and W2 domai    | BZW1        | 0.9066   | 10320.9 |
| ENSGALT0000 basic leucine zipper and W2 domai    | BZW2        | 0.848995 | 5278.5  |
| ENSGALT0000 chromosome 10 open reading fram      | C10H15orf26 | 0.955085 | 12.5    |
| ENSGALT0000 chromosome 10 open reading fram      | C10H15orf40 | 0.229097 | 321.5   |
| ENSGALT0000 chromosome 10 open reading fram      | C10H15orf42 | 0.957627 | 1098.48 |
| ENSGALT0000 chromosome 10 open reading fram      | C10H15orf44 | 0.896503 | 1508.5  |
| ENSGALT0000 chromosome 10 open reading fram      | C10H15orf59 | 0.526675 | 47      |
| ENSGALT0000 chromosome 10 open reading fram      | C10H15orf60 | 0.895664 | 182.499 |
| ENSGALT0000 chromosome 10 open reading fram      | C10orf107   | 0.962956 | 19.5    |
| ENSGALT0000 chromosome 10 open reading fram      | C10orf112   | 0.603682 | 0       |
| ENSGALT0000 chromosome 10 open reading fram      | C10orf12    | 0.979737 | 1119    |
| ENSGALT0000 chromosome 10 open reading fram      | C10orf122   | 0.562993 | 1.5     |

|                                                          |           |         |
|----------------------------------------------------------|-----------|---------|
| ENSGALT0000 chromosome 10 open reading fram C10orf140    | 0.909416  | 437     |
| ENSGALT0000 chromosome 10 open reading fram C10orf47     | 0.993447  | 413.5   |
| ENSGALT0000 chromosome 10 open reading fram C10orf54     | 0.961331  | 128.5   |
| ENSGALT0000 chromosome 10 open reading fram C10orf67     | 0.464758  | 0       |
| ENSGALT0000 chromosome 10 open reading fram C10orf81     | 0.589588  | 1       |
| ENSGALT0000 chromosome 10 open reading fram C10orf90     | 0.828153  | 21      |
| ENSGALT0000 chromosome 11 open reading fram C11H16orf57  | 0.796579  | 1144    |
| ENSGALT0000 chromosome 11 open reading fram C11H16orf7   | 0.950655  | 371     |
| ENSGALT0000 chromosome 11 open reading fram C11H16orf70  | 0.980757  | 1121.5  |
| ENSGALT0000 chromosome 11 open reading fram C11H16orf80  | 0.739963  | 2648    |
| ENSGALT0000 chromosome 11 open reading fram C11H16orf87  | 0.888985  | 271.5   |
| ENSGALT0000 chromosome 11 open reading fram C11H19orf40  | 0.86688   | 63.5    |
| ENSGALT0000 chromosome 11 open reading fram C11orf16     | 0.633919  | 12.5    |
| ENSGALT0000 chromosome 11 open reading fram C11orf2      | 0.822816  | 2163.52 |
| ENSGALT0000 chromosome 11 open reading fram C11orf51     | 0.621103  | 649     |
| ENSGALT0000 chromosome 11 open reading fram C11orf61     | 0.914864  | 525.5   |
| ENSGALT0000 chromosome 11 open reading fram C11orf63     | 0.989331  | 81.5    |
| ENSGALT0000 chromosome 11 open reading fram C11orf74     | 0.876714  | 123     |
| ENSGALT0000 chromosome 11 open reading fram C11orf75     | 0.216244  | 64.5    |
| ENSGALT0000 chromosome 11 open reading fram C11orf82     | 0.982494  | 155     |
| ENSGALT0000 chromosome 11 open reading fram C11orf87     | 0.52653   | 22.5    |
| ENSGALT0000 chromosome 11 open reading fram C11orf89     | 0.363607  | 2.5     |
| ENSGALT0000 chromosome 11 open reading fram C11orf9      | 0.995156  | 837.006 |
| ENSGALT0000 chromosome 11 open reading fram C11orf96     | 0.395778  | 104.5   |
| ENSGALT0000 chromosome 12 open reading fram C12H3orf14   | 0.969554  | 48.5    |
| ENSGALT0000 chromosome 12 open reading fram C12H3orf18   | 0.948721  | 383.5   |
| ENSGALT0000 chromosome 12 open reading fram C12H3orf19   | 0.938986  | 477.258 |
| ENSGALT0000 chromosome 12 open reading fram C12H3orf37   | 0.656645  | 1989.98 |
| ENSGALT0000 chromosome 12 open reading fram C12H9orf89   | 0.967384  | 55      |
| ENSGALT0000 chromosome 12 open reading fram C12orf10     | 0.695509  | 1588    |
| ENSGALT0000 chromosome 12 open reading fram C12orf28     | 0.804174  | 3       |
| ENSGALT0000 chromosome 12 open reading fram C12orf34     | 0.92873   | 659     |
| ENSGALT0000 chromosome 12 open reading fram C12orf39     | 0.649519  | 0.5     |
| ENSGALT0000 chromosome 12 open reading fram C12orf5      | 0.860944  | 82.5    |
| ENSGALT0000 chromosome 12 open reading fram C12orf53     | 0.834696  | 253.5   |
| ENSGALT0000 chromosome 12 open reading fram C12orf57     | 0.171636  | 4703    |
| ENSGALT0000 chromosome 12 open reading fram C12orf59     | 0.464758  | 0       |
| ENSGALT0000 chromosome 12 open reading fram C12orf62     | 0.030584  | 682     |
| ENSGALT0000 chromosome 12 open reading fram C12orf63     | 0.872396  | 395.5   |
| ENSGALT0000 chromosome 12 open reading fram C12orf65     | 0.755072  | 245.5   |
| ENSGALT0000 chromosome 12 open reading fram C12orf69     | 0.464758  | 0       |
| ENSGALT0000 chromosome 13 open reading fram C13H5orf15   | 0.968022  | 3694.5  |
| ENSGALT0000 chromosome 13 open reading fram C13H5orf25   | 0.992036  | 465.5   |
| ENSGALT0000 chromosome 13 open reading fram C13H5orf4    | 0.983163  | 36.5    |
| ENSGALT0000 chromosome 13 open reading fram C13H5orf41   | 0.999926  | 241.5   |
| ENSGALT0000 chromosome 13 open reading fram C13H5orf45   | 0.920788  | 746.996 |
| ENSGALT0000 chromosome 14 open reading fram C14H16orf42  | 0.870761  | 338     |
| ENSGALT0000 chromosome 14 open reading fram C14H16orf45  | 0.870508  | 601     |
| ENSGALT0000 chromosome 14 open reading fram C14H16orf5   | 0.785254  | 535.5   |
| ENSGALT0000 chromosome 14 open reading fram C14H16orf62  | 0.960627  | 1800.98 |
| ENSGALT0000 chromosome 14 open reading fram C14H16orf79  | 0.0183259 | 126.5   |
| ENSGALT0000 chromosome 14 open reading fram C14H17orf103 | 0.979248  | 2277.27 |
| ENSGALT0000 chromosome 14 open reading fram C14H17orf39  | 0.948755  | 273.5   |
| ENSGALT0000 chromosome 14 open reading fram C14H7orf26   | 0.873042  | 569     |
| ENSGALT0000 chromosome 14 open reading fram C14H7orf50   | 0.840407  | 248     |
| ENSGALT0000 chromosome 14 open reading fram C14H7orf62   | 0.782167  | 157     |

|                                                           |          |         |
|-----------------------------------------------------------|----------|---------|
| ENSGALT0000 chromosome 14 open reading fram C14H8orf33    | 0.929283 | 692     |
| ENSGALT0000 chromosome 14 open reading fram C14orf1       | 0.949086 | 309.5   |
| ENSGALT0000 chromosome 14 open reading fram C14orf105     | 0.164317 | 0.5     |
| ENSGALT0000 chromosome 14 open reading fram C14orf166B    | 0.539038 | 0       |
| ENSGALT0000 chromosome 14 open reading fram C14orf37      | 0.962087 | 3773.12 |
| ENSGALT0000 chromosome 14 open reading fram C14orf38      | 0.603682 | 0       |
| ENSGALT0000 chromosome 14 open reading fram C14orf39      | 0.649519 | 0.5     |
| ENSGALT0000 chromosome 14 open reading fram C14orf45      | 0.989007 | 39      |
| ENSGALT0000 chromosome 15 open reading fram C15H12orf43   | 0.721764 | 133     |
| ENSGALT0000 chromosome 15 open reading fram C15H12orf49   | 0.95798  | 3578.5  |
| ENSGALT0000 chromosome 15 open reading fram C15H12orf51   | 0.899663 | 461.5   |
| ENSGALT0000 chromosome 15 open reading fram C15H14orf166B | 0.881416 | 130.5   |
| ENSGALT0000 chromosome 15 open reading fram C15H22orf13   | 0.926342 | 153.5   |
| ENSGALT0000 chromosome 15 open reading fram C15H22orf25   | 0.96078  | 669.5   |
| ENSGALT0000 chromosome 15 open reading fram C15H22orf36   | 0.713602 | 945     |
| ENSGALT0000 chromosome 15 open reading fram C15orf17      | 0.895478 | 344     |
| ENSGALT0000 chromosome 15 open reading fram C15orf27      | 0.951014 | 367.668 |
| ENSGALT0000 chromosome 15 open reading fram C15orf48      | 0.464758 | 0       |
| ENSGALT0000 chromosome 15 open reading fram C15orf62      | 0.649519 | 3       |
| ENSGALT0000 galectin CG-16 C-16                           | 0.832321 | 1261.02 |
| ENSGALT0000 chromosome 16 open reading fram C16orf11      | 0.19245  | 0.5     |
| ENSGALT0000 chromosome 16 open reading fram C16orf48      | 0.952038 | 635     |
| ENSGALT0000 chromosome 16 open reading fram C16orf52      | 0.928585 | 98      |
| ENSGALT0000 chromosome 16 open reading fram C16orf59      | 0.98565  | 256.5   |
| ENSGALT0000 chromosome 16 open reading fram C16orf72      | 0.873223 | 1007    |
| ENSGALT0000 chromosome 16 open reading fram C16orf73      | 0.976505 | 78      |
| ENSGALT0000 chromosome 16 open reading fram C16orf88      | 0.875371 | 307     |
| ENSGALT0000 chromosome 16 open reading fram C16orf89      | 0.997584 | 6       |
| ENSGALT0000 chromosome 16 open reading fram C16orf93      | 0.882689 | 650     |
| ENSGALT0000 chromosome 17 open reading fram C17H9orf114   | 0.726376 | 839.5   |
| ENSGALT0000 chromosome 17 open reading fram C17H9orf16    | 0.815242 | 1031.5  |
| ENSGALT0000 chromosome 17 open reading fram C17H9orf167   | 0.995947 | 258     |
| ENSGALT0000 chromosome 17 open reading fram C17H9orf171   | 0.666233 | 13      |
| ENSGALT0000 chromosome 17 open reading fram C17H9orf7     | 0.781817 | 429.166 |
| ENSGALT0000 chromosome 17 open reading fram C17H9orf78    | 0.822936 | 705.5   |
| ENSGALT0000 chromosome 17 open reading fram C17H9orf9     | 0.949678 | 45.5    |
| ENSGALT0000 chromosome 17 open reading fram C17H9orf91    | 0.313276 | 22      |
| ENSGALT0000 chromosome 17 open reading fram C17orf101     | 0.951477 | 378.178 |
| ENSGALT0000 chromosome 17 open reading fram C17orf104     | ?        | 0       |
| ENSGALT0000 chromosome 17 open reading fram C17orf58      | 0.922923 | 17      |
| ENSGALT0000 chromosome 17 open reading fram C17orf70      | 0.822584 | 356     |
| ENSGALT0000 chromosome 18 open reading fram C18H17orf28   | 0.97923  | 2963    |
| ENSGALT0000 chromosome 18 open reading fram C18H17orf56   | 0.812688 | 297.5   |
| ENSGALT0000 chromosome 18 open reading fram C18H17orf62   | 0.921012 | 1428.5  |
| ENSGALT0000 chromosome 18 open reading fram C18H17orf67   | 0.736834 | 58      |
| ENSGALT0000 chromosome 18 open reading fram C18H17orf75   | 0.891542 | 498     |
| ENSGALT0000 chromosome 18 open reading fram C18H17orf80   | 0.998835 | 556.5   |
| ENSGALT0000 chromosome 18 open reading fram C18orf32      | 0.992836 | 781     |
| ENSGALT0000 chromosome 19 open reading fram C19H17orf108  | 0.989599 | 49.5    |
| ENSGALT0000 chromosome 19 open reading fram C19H17orf63   | 0.953839 | 2264.5  |
| ENSGALT0000 chromosome 19 open reading fram C19H17orf76   | 0.902866 | 360.5   |
| ENSGALT0000 chromosome 19 open reading fram C19H17orf78   | 0.956967 | 14.5    |
| ENSGALT0000 chromosome 19 open reading fram C19H17orf85   | 0.975033 | 1073    |
| ENSGALT0000 chromosome 19 open reading fram C19H7orf42    | 0.966441 | 3022.5  |
| ENSGALT0000 chromosome 19 open reading fram C19orf12      | 0.837581 | 806     |
| ENSGALT0000 chromosome 19 open reading fram C19orf21      | 0.637764 | 87      |

|                                                        |          |         |
|--------------------------------------------------------|----------|---------|
| ENSGALT0000 chromosome 19 open reading fram C19orf29   | 0.856257 | 948     |
| ENSGALT0000 chromosome 19 open reading fram C19orf44   | 0.993067 | 111.5   |
| ENSGALT0000 chromosome 19 open reading fram C19orf45   | 0.649519 | 2.5     |
| ENSGALT0000 C1D nuclear receptor corepressor C1D       | 0.93551  | 321     |
| ENSGALT0000 core 1 synthase, glycoprotein-N-ac C1GALT1 | 0.95441  | 3526    |
| ENSGALT0000 C1GALT1-specific chaperone 1 C1GALT1C1     | 0.901078 | 551.5   |
| ENSGALT0000 chromosome 1 open reading frame C1H11orf30 | 0.96436  | 1108.5  |
| ENSGALT0000 chromosome 1 open reading frame C1H11orf54 | 0.884618 | 330     |
| ENSGALT0000 chromosome 1 open reading frame C1H11orf67 | 0.739114 | 212.064 |
| ENSGALT0000 chromosome 1 open reading frame C1H11orf70 | 0.987888 | 154     |
| ENSGALT0000 chromosome 1 open reading frame C1H11orf73 | 0.817507 | 1325.01 |
| ENSGALT0000 chromosome 1 open reading frame C1H12orf11 | 0.967293 | 4016.5  |
| ENSGALT0000 chromosome 1 open reading frame C1H12orf23 | 0.969485 | 2930    |
| ENSGALT0000 chromosome 1 open reading frame C1H12orf26 | 0.975081 | 259     |
| ENSGALT0000 chromosome 1 open reading frame C1H12orf29 | 0.970113 | 298.5   |
| ENSGALT0000 chromosome 1 open reading frame C1H12orf32 | 0.963006 | 107     |
| ENSGALT0000 chromosome 1 open reading frame C1H12orf35 | 0.973158 | 925     |
| ENSGALT0000 chromosome 1 open reading frame C1H12orf4  | 0.930823 | 657.001 |
| ENSGALT0000 chromosome 1 open reading frame C1H12orf45 | 0.932313 | 563.5   |
| ENSGALT0000 chromosome 1 open reading frame C1H12orf48 | 0.923602 | 60      |
| ENSGALT0000 chromosome 1 open reading frame C1H12orf50 | 0.997127 | 197.5   |
| ENSGALT0000 chromosome 1 open reading frame C1H12orf66 | 0.976495 | 333     |
| ENSGALT0000 chromosome 1 open reading frame C1H12orf73 | 0.495345 | 149     |
| ENSGALT0000 chromosome 1 open reading frame C1H13orf15 | 0.509492 | 116     |
| ENSGALT0000 chromosome 1 open reading frame C1H1orf114 | 0.86501  | 47      |
| ENSGALT0000 chromosome 1 open reading frame C1H21orf33 | 0.816891 | 1791.52 |
| ENSGALT0000 chromosome 1 open reading frame C1H21orf59 | 0.971227 | 706.5   |
| ENSGALT0000 chromosome 1 open reading frame C1H21orf63 | 0.948423 | 45      |
| ENSGALT0000 chromosome 1 open reading frame C1H21orf91 | 0.986905 | 553     |
| ENSGALT0000 chromosome 1 open reading frame C1H22orf23 | 0.98348  | 114     |
| ENSGALT0000 chromosome 1 open reading frame C1H22orf28 | 0.902084 | 3213.5  |
| ENSGALT0000 chromosome 1 open reading frame C1H22orf33 | 0.938423 | 7.5     |
| ENSGALT0000 chromosome 1 open reading frame C1H22orf40 | 0.96777  | 388.5   |
| ENSGALT0000 chromosome 1 open reading frame C1H2orf29  | 0.850095 | 2027    |
| ENSGALT0000 chromosome 1 open reading frame C1H2orf49  | 0.956239 | 568.5   |
| ENSGALT0000 chromosome 1 open reading frame C1H3orf15  | 0.989964 | 135     |
| ENSGALT0000 chromosome 1 open reading frame C1H3orf26  | 0.933114 | 195     |
| ENSGALT0000 chromosome 1 open reading frame C1H3orf38  | 0.832729 | 233.5   |
| ENSGALT0000 chromosome 1 open reading frame C1H7orf23  | 0.992336 | 316.5   |
| ENSGALT0000 chromosome 1 open reading frame C1H7orf53  | ?        | 0       |
| ENSGALT0000 chromosome 1 open reading frame C1H7orf55  | 0.307004 | 1419    |
| ENSGALT0000 chromosome 1 open reading frame C1H7orf60  | 0.977022 | 594     |
| ENSGALT0000 chromosome 1 open reading frame C1HXorf22  | 0.963101 | 28.5    |
| ENSGALT0000 chromosome 1 open reading frame C1HXorf36  | 0.834796 | 151.5   |
| ENSGALT0000 chromosome 1 open reading frame C1orf101   | 0.990982 | 45.5    |
| ENSGALT0000 chromosome 1 open reading frame C1orf130   | 0.984152 | 46      |
| ENSGALT0000 chromosome 1 open reading frame C1orf170   | 0.464758 | 0       |
| ENSGALT0000 chromosome 1 open reading frame C1orf173   | 0.885314 | 65      |
| ENSGALT0000 chromosome 1 open reading frame C1orf174   | 0.928167 | 457     |
| ENSGALT0000 chromosome 1 open reading frame C1orf177   | 0.780657 | 3       |
| ENSGALT0000 chromosome 1 open reading frame C1orf190   | 0.681908 | 36.5    |
| ENSGALT0000 chromosome 1 open reading frame C1orf212   | 0.253864 | 0.00126 |
| ENSGALT0000 chromosome 1 open reading frame C1orf216   | 0.268313 | 260.5   |
| ENSGALT0000 chromosome 1 open reading frame C1orf222   | 0.983243 | 64.5    |
| ENSGALT0000 chromosome 1 open reading frame C1orf228   | 0.993867 | 61      |
| ENSGALT0000 chromosome 1 open reading frame C1orf53    | 0.40424  | 43.5    |

|                                                          |           |         |
|----------------------------------------------------------|-----------|---------|
| ENSGALT0000 chromosome 1 open reading frame C1orf55      | 0.894577  | 1328    |
| ENSGALT0000 chromosome 1 open reading frame C1orf63      | 0.983502  | 2274.5  |
| ENSGALT0000 chromosome 1 open reading frame C1orf67      | 0.464758  | 0       |
| ENSGALT0000 chromosome 1 open reading frame C1orf95      | 0.589121  | 50      |
| ENSGALT0000 complement component 1, q subco C1QA         | 0.420128  | 15.3821 |
| ENSGALT0000 complement component 1, q subco C1QB         | 0.249225  | 24.1179 |
| ENSGALT0000 complement component 1, q subco C1QBP        | 0.700164  | 3422    |
| ENSGALT0000 complement component 1, q subco C1QC         | 0.174401  | 19      |
| ENSGALT0000 complement component 1, q subco C1QL2        | 0.0121508 | 22.5    |
| ENSGALT0000 complement component 1, q subco C1QL3        | 0.942866  | 2.5     |
| ENSGALT0000 complement component 1, q subco C1QL4        | 0.974924  | 75.5    |
| ENSGALT0000 C1q and tumor necrosis factor relai C1QTNF1  | 0.924392  | 104     |
| ENSGALT0000 C1q and tumor necrosis factor relai C1QTNF2  | 0.946301  | 12      |
| ENSGALT0000 C1q and tumor necrosis factor relai C1QTNF3  | 0.9264    | 14.5    |
| ENSGALT0000 C1q and tumor necrosis factor relai C1QTNF4  | 0.934995  | 554     |
| ENSGALT0000 C1q and tumor necrosis factor relai C1QTNF5  | 0.767549  | 204.189 |
| ENSGALT0000 C1q and tumor necrosis factor relai C1QTNF6  | 0.898514  | 88.5    |
| ENSGALT0000 C1q and tumor necrosis factor relai C1QTNF7  | 0.70681   | 12.5    |
| ENSGALT0000 C1q and tumor necrosis factor relai C1QTNF8  | 0.573438  | 10      |
| ENSGALT0000 complement component 1, r subco C1R          | 0.972697  | 410.998 |
| ENSGALT0000 complement component 1, s subco C1S          | 0.98457   | 66      |
| ENSGALT0000 complement component 2 C2                    | 0.9467    | 79      |
| ENSGALT0000 chromosome 20 open reading fram C20H20orf11  | 0.977313  | 1246    |
| ENSGALT0000 chromosome 20 open reading fram C20H20orf111 | 0.959602  | 510.999 |
| ENSGALT0000 chromosome 20 open reading fram C20H20orf151 | 0.815985  | 516     |
| ENSGALT0000 chromosome 20 open reading fram C20H20orf177 | 0.967424  | 102     |
| ENSGALT0000 chromosome 20 open reading fram C20H20orf20  | 0.898077  | 559.5   |
| ENSGALT0000 chromosome 20 open reading fram C20H20orf24  | 0.849405  | 2421    |
| ENSGALT0000 chromosome 20 open reading fram C20H20orf4   | 0.903501  | 1266    |
| ENSGALT0000 chromosome 20 open reading fram C20H20orf43  | 0.933279  | 2217.5  |
| ENSGALT0000 chromosome 20 open reading fram C20H20orf85  | 0.798388  | 9       |
| ENSGALT0000 chromosome 20 open reading fram C20H20orf96  | 0.931527  | 136.5   |
| ENSGALT0000 chromosome 20 open reading fram C20orf112    | 0.874765  | 339.5   |
| ENSGALT0000 chromosome 20 open reading fram C20orf118    | 0.464758  | 0       |
| ENSGALT0000 chromosome 20 open reading fram C20orf123    | 0.95016   | 15      |
| ENSGALT0000 chromosome 20 open reading fram C20orf160    | 0.682545  | 73      |
| ENSGALT0000 chromosome 20 open reading fram C20orf195    | 0.828826  | 2       |
| ENSGALT0000 chromosome 20 open reading fram C20orf196    | 0.997512  | 54      |
| ENSGALT0000 chromosome 20 open reading fram C20orf54     | 0.957267  | 722.5   |
| ENSGALT0000 chromosome 20 open reading fram C20orf7      | 0.712618  | 415     |
| ENSGALT0000 chromosome 20 open reading fram C20orf94     | 0.934124  | 119     |
| ENSGALT0000 chromosome 21 open reading fram C21H1orf144  | 0.975908  | 2211    |
| ENSGALT0000 chromosome 21 open reading fram C21H1orf159  | 0.941839  | 184.5   |
| ENSGALT0000 chromosome 21 open reading fram C21H1orf187  | 0.973041  | 137.5   |
| ENSGALT0000 chromosome 21 open reading fram C21H1orf50   | 0.673769  | 542     |
| ENSGALT0000 chromosome 21 open reading fram C21H1orf70   | 0.979016  | 95      |
| ENSGALT0000 chromosome 21 open reading fram C21orf62     | 0.102846  | 0.5     |
| ENSGALT0000 chromosome 21 open reading fram C21orf7      | 0.573093  | 5       |
| ENSGALT0000 chromosome 22 open reading fram C22H20orf30  | 0.931907  | 824.781 |
| ENSGALT0000 chromosome 22 open reading fram C22H2orf42   | 0.954176  | 506.5   |
| ENSGALT0000 chromosome 22 open reading fram C22H8orf4    | 0.705639  | 99.5    |
| ENSGALT0000 chromosome 22 open reading fram C22orf32     | 0.789262  | 1461    |
| ENSGALT0000 chromosome 22 open reading fram C22orf39     | 0.10674   | 200     |
| ENSGALT0000 chromosome 23 open reading fram C23H1orf109  | 0.826838  | 364.501 |
| ENSGALT0000 chromosome 23 open reading fram C23H1orf172  | 0.999135  | 635.5   |
| ENSGALT0000 chromosome 23 open reading fram C23H1orf38   | 0.84693   | 107     |



|                                                          |           |         |
|----------------------------------------------------------|-----------|---------|
| ENSGALT0000 chromosome 23 open reading fram C23H1orf94   | ?         | 0       |
| ENSGALT0000 chromosome 24 open reading fram C24H11orf1   | 0.464758  | 0       |
| ENSGALT0000 chromosome 24 open reading fram C24H11orf34  | 0.835134  | 7       |
| ENSGALT0000 chromosome 24 open reading fram C24H11orf57  | 0.710773  | 254     |
| ENSGALT0000 chromosome 25 open reading fram C25H1orf43   | 0.834414  | 1064.01 |
| ENSGALT0000 chromosome 26 open reading fram C26H1orf116  | 0.779278  | 1803.02 |
| ENSGALT0000 chromosome 26 open reading fram C26H1orf74   | 0.623884  | 212     |
| ENSGALT0000 chromosome 26 open reading fram C26H1orf88   | 0.0811899 | 0.5     |
| ENSGALT0000 chromosome 26 open reading fram C26H6orf106  | 0.978578  | 4250.62 |
| ENSGALT0000 chromosome 26 open reading fram C26H6orf130  | 0.916474  | 807     |
| ENSGALT0000 chromosome 26 open reading fram C26H6orf89   | 0.967665  | 1123.5  |
| ENSGALT0000 chromosome 27 open reading fram C27H17orf105 | 0.965245  | 28.5    |
| ENSGALT0000 chromosome 28 open reading fram C28H19orf10  | 0.901381  | 3081    |
| ENSGALT0000 chromosome 28 open reading fram C28H19orf50  | 0.532563  | 473     |
| ENSGALT0000 chromosome 28 open reading fram C28H19orf6   | 0.954445  | 1786    |
| ENSGALT0000 C2 calcium-dependent domain con C2CD2        | 0.968064  | 599     |
| ENSGALT0000 C2CD2-like C2CD2L                            | 0.983078  | 1103    |
| ENSGALT0000 C2 calcium-dependent domain con C2CD3        | 0.982126  | 513     |
| ENSGALT0000 C2 calcium-dependent domain con C2CD4C       | 0.612788  | 40      |
| ENSGALT0000 chromosome 2 open reading frame C2H18orf1    | 0.998159  | 924.994 |
| ENSGALT0000 chromosome 2 open reading frame C2H18orf21   | 0.921619  | 165.5   |
| ENSGALT0000 chromosome 2 open reading frame C2H18orf45   | 0.982533  | 481     |
| ENSGALT0000 chromosome 2 open reading frame C2H18orf55   | 0.895631  | 618.5   |
| ENSGALT0000 chromosome 2 open reading frame C2H18orf8    | 0.978081  | 897.287 |
| ENSGALT0000 chromosome 2 open reading frame C2H1orf35    | 0.766207  | 308.5   |
| ENSGALT0000 chromosome 2 open reading frame C2H3orf23    | 0.938686  | 630.5   |
| ENSGALT0000 chromosome 2 open reading frame C2H3orf24    | 0.943934  | 2       |
| ENSGALT0000 chromosome 2 open reading frame C2H3orf39    | 0.882726  | 744.5   |
| ENSGALT0000 chromosome 2 open reading frame C2H3orf75    | 0.924544  | 556.5   |
| ENSGALT0000 chromosome 2 open reading frame C2H5orf22    | 0.944271  | 302.001 |
| ENSGALT0000 chromosome 2 open reading frame C2H6orf105   | 0.562993  | 0.5     |
| ENSGALT0000 chromosome 2 open reading frame C2H6orf145   | 0.775801  | 128.5   |
| ENSGALT0000 chromosome 2 open reading frame C2H6orf62    | 0.916588  | 1690    |
| ENSGALT0000 chromosome 2 open reading frame C2H7orf11    | 0.994312  | 148.033 |
| ENSGALT0000 chromosome 2 open reading frame C2H7orf46    | 0.726461  | 50      |
| ENSGALT0000 chromosome 2 open reading frame C2H7orf57    | 0.778348  | 3       |
| ENSGALT0000 chromosome 2 open reading frame C2H7orf63    | 0.98958   | 559.5   |
| ENSGALT0000 chromosome 2 open reading frame C2H8orf22    | 0.47058   | 7.5     |
| ENSGALT0000 chromosome 2 open reading frame C2H8orf38    | 0.959099  | 429     |
| ENSGALT0000 chromosome 2 open reading frame C2H8orf45    | 0.989492  | 10      |
| ENSGALT0000 chromosome 2 open reading frame C2H8orf76    | 0.956645  | 587.5   |
| ENSGALT0000 chromosome 2 open reading frame C2H8orf83    | 0.97493   | 25.5    |
| ENSGALT0000 chromosome 2 open reading frame C2H8orf84    | 0.749459  | 36.8294 |
| ENSGALT0000 chromosome 2 open reading frame C2H9orf152   | 0.711353  | 3       |
| ENSGALT0000 chromosome 2 open reading frame C2H9orf4     | 0.963747  | 477.499 |
| ENSGALT0000 chromosome 2 open reading frame C2orf40      | 0.117371  | 168     |
| ENSGALT0000 chromosome 2 open reading frame C2orf50      | 0.649519  | 0.5     |
| ENSGALT0000 chromosome 2 open reading frame C2orf55      | 0.823063  | 192.5   |
| ENSGALT0000 chromosome 2 open reading frame C2orf62      | 0.904378  | 69.5    |
| ENSGALT0000 chromosome 2 open reading frame C2orf65      | 0.985609  | 101.5   |
| ENSGALT0000 chromosome 2 open reading frame C2orf71      | 0.780657  | 1.5     |
| ENSGALT0000 chromosome 2 open reading frame C2orf77      | 0.956681  | 694.5   |
| ENSGALT0000 chromosome 2 open reading frame C2orf89      | 0.872002  | 11.5    |
| ENSGALT0000 complement component 3 C3                    | 0.709265  | 28      |
| ENSGALT0000 complement component 3a receptc C3AR1        | 0.846579  | 18.5    |
| ENSGALT0000 chromosome 3 open reading frame C3H17orf59   | 0.419156  | 1120    |

|                                                          |          |         |
|----------------------------------------------------------|----------|---------|
| ENSGALT0000 chromosome 3 open reading frame C3H1orf100   | 0.651373 | 2.5     |
| ENSGALT0000 chromosome 3 open reading frame C3H1orf124   | 0.983304 | 523.97  |
| ENSGALT0000 chromosome 3 open reading frame C3H1orf131   | 0.765418 | 273     |
| ENSGALT0000 chromosome 3 open reading frame C3H1orf31    | 0.346609 | 238.5   |
| ENSGALT0000 chromosome 3 open reading frame C3H1orf96    | 0.93795  | 80      |
| ENSGALT0000 chromosome 3 open reading frame C3H20orf103  | 0.796318 | 69.5    |
| ENSGALT0000 chromosome 3 open reading frame C3H20orf26   | 0.999026 | 274.5   |
| ENSGALT0000 chromosome 3 open reading frame C3H20orf3    | 0.895856 | 1992    |
| ENSGALT0000 chromosome 3 open reading frame C3H20orf72   | 0.963165 | 328     |
| ENSGALT0000 chromosome 3 open reading frame C3H2orf18    | 0.701872 | 1542.5  |
| ENSGALT0000 chromosome 3 open reading frame C3H2orf43    | 0.893665 | 996.498 |
| ENSGALT0000 chromosome 3 open reading frame C3H2orf56    | 0.876278 | 558.996 |
| ENSGALT0000 chromosome 3 open reading frame C3H6orf120   | 0.954931 | 450     |
| ENSGALT0000 chromosome 3 open reading frame C3H6orf163   | 0.942866 | 24      |
| ENSGALT0000 chromosome 3 open reading frame C3H6orf165   | 0.994005 | 55.5    |
| ENSGALT0000 chromosome 3 open reading frame C3H6orf168   | 0.942475 | 305.5   |
| ENSGALT0000 chromosome 3 open reading frame C3H6orf186   | 0.889211 | 326     |
| ENSGALT0000 chromosome 3 open reading frame C3H6orf191   | ?        | 0       |
| ENSGALT0000 chromosome 3 open reading frame C3H6orf192   | 0.995304 | 947     |
| ENSGALT0000 chromosome 3 open reading frame C3H6orf203   | 0.974136 | 379     |
| ENSGALT0000 chromosome 3 open reading frame C3H6orf211   | 0.952484 | 356.5   |
| ENSGALT0000 chromosome 3 open reading frame C3H6orf57    | 0.847114 | 550     |
| ENSGALT0000 chromosome 3 open reading frame C3H6orf70    | 0.986648 | 401     |
| ENSGALT0000 chromosome 3 open reading frame C3H6orf72    | 0.994027 | 991.001 |
| ENSGALT0000 chromosome 3 open reading frame C3H6orf97    | 0.826707 | 64.5    |
| ENSGALT0000 chromosome 3 open reading frame C3H8orf42    | 0.990408 | 289     |
| ENSGALT0000 chromosome 3 open reading frame C3orf17      | 0.989771 | 275     |
| ENSGALT0000 chromosome 3 open reading frame C3orf25      | 0.9799   | 86      |
| ENSGALT0000 chromosome 3 open reading frame C3orf55      | 0.659863 | 688.5   |
| ENSGALT0000 glycosyltransferase C3orf64                  | 0.891194 | 256     |
| ENSGALT0000 chromosome 3 open reading frame C3orf67      | 0.991114 | 90      |
| ENSGALT0000 chromosome 3 open reading frame C3orf77      | 0.943934 | 1       |
| ENSGALT0000 chromosome 3 open reading frame C3orf78      | 0.205645 | 686.5   |
| ENSGALT0000 complement component 4 binding protein C4BPA | 0.987306 | 1787    |
| ENSGALT0000 chromosome 4 open reading frame C4H20orf194  | 0.808671 | 1661.5  |
| ENSGALT0000 chromosome 4 open reading frame C4H4orf17    | 0.933631 | 3       |
| ENSGALT0000 chromosome 4 open reading frame C4H4orf21    | 0.951414 | 117     |
| ENSGALT0000 chromosome 4 open reading frame C4H4orf27    | 0.78959  | 1728.5  |
| ENSGALT0000 chromosome 4 open reading frame C4H4orf29    | 0.983156 | 872.001 |
| ENSGALT0000 chromosome 4 open reading frame C4H4orf33    | 0.949953 | 208     |
| ENSGALT0000 chromosome 4 open reading frame C4H4orf34    | 0.985414 | 283.5   |
| ENSGALT0000 chromosome 4 open reading frame C4H4orf43    | 0.95316  | 366.5   |
| ENSGALT0000 chromosome 4 open reading frame C4H4orf44    | 0.982225 | 93.5001 |
| ENSGALT0000 chromosome 4 open reading frame C4H4orf45    | 0.971293 | 3       |
| ENSGALT0000 chromosome 4 open reading frame C4H4orf47    | 0.954031 | 9       |
| ENSGALT0000 chromosome 4 open reading frame C4H4orf52    | 0.824051 | 751     |
| ENSGALT0000 chromosome 4 open reading frame C4H8orf40    | 0.557506 | 1659.5  |
| ENSGALT0000 chromosome 4 open reading frame C4HXorf41    | 0.963677 | 509     |
| ENSGALT0000 chromosome 4 open reading frame C4HXorf56    | 0.906539 | 1744.5  |
| ENSGALT0000 chromosome 4 open reading frame C4HXorf57    | 0.985817 | 359     |
| ENSGALT0000 chromosome 4 open reading frame C4orf19      | 0.832763 | 183.5   |
| ENSGALT0000 chromosome 4 open reading frame C4orf32      | 0.937278 | 37      |
| ENSGALT0000 complement component 5 C5                    | 0.994247 | 142.5   |
| ENSGALT0000 complement component 5a receptor C5AR1       | 0.627809 | 4.5     |
| ENSGALT0000 chromosome 5 open reading frame C5H11orf10   | 0.125719 | 3287.5  |
| ENSGALT0000 chromosome 5 open reading frame C5H11orf41   | 0.860048 | 413.5   |

|                                                         |          |         |
|---------------------------------------------------------|----------|---------|
| ENSGALT0000 chromosome 5 open reading frame C5H11orf46  | 0.875195 | 763.499 |
| ENSGALT0000 chromosome 5 open reading frame C5H11orf49  | 0.941712 | 325     |
| ENSGALT0000 small acidic protein C5H11orf58             | 0.593356 | 2328    |
| ENSGALT0000 chromosome 5 open reading frame C5H14orf101 | 0.933511 | 718.5   |
| ENSGALT0000 chromosome 5 open reading frame C5H14orf102 | 0.979021 | 782.5   |
| ENSGALT0000 chromosome 5 open reading frame C5H14orf118 | 0.965337 | 498     |
| ENSGALT0000 chromosome 5 open reading frame C5H14orf129 | 0.962481 | 448     |
| ENSGALT0000 chromosome 5 open reading frame C5H14orf135 | 0.983682 | 901.5   |
| ENSGALT0000 chromosome 5 open reading frame C5H14orf149 | 0.963801 | 1376.5  |
| ENSGALT0000 chromosome 5 open reading frame C5H14orf159 | 0.966157 | 276     |
| ENSGALT0000 chromosome 5 open reading frame C5H14orf166 | 0.876905 | 2995.03 |
| ENSGALT0000 chromosome 5 open reading frame C5H14orf169 | 0.844775 | 1499.5  |
| ENSGALT0000 chromosome 5 open reading frame C5H14orf38  | 0.603682 | 0       |
| ENSGALT0000 chromosome 5 open reading frame C5H14orf43  | 0.9743   | 292     |
| ENSGALT0000 chromosome 5 open reading frame C5H14orf49  | 0.990015 | 162.5   |
| ENSGALT0000 chromosome 5 open reading frame C5H14orf79  | 0.944507 | 60.5    |
| ENSGALT0000 chromosome 5 open reading frame C5H15orf23  | 0.697096 | 833.5   |
| ENSGALT0000 chromosome 5 open reading frame C5H15orf24  | 0.895535 | 932.5   |
| ENSGALT0000 chromosome 5 open reading frame C5H15orf29  | 0.965088 | 485     |
| ENSGALT0000 chromosome 5 open reading frame C5H15orf41  | 0.998411 | 554.499 |
| ENSGALT0000 chromosome 5 open reading frame C5H15orf57  | 0.808222 | 1328    |
| ENSGALT0000 P311 POU C5orf13                            | 0.934583 | 4716.95 |
| ENSGALT0000 chromosome 5 open reading frame C5orf24     | 0.895823 | 483.5   |
| ENSGALT0000 chromosome 5 open reading frame C5orf35     | 0.887836 | 356     |
| ENSGALT0000 chromosome 5 open reading frame C5orf63     | 0.995664 | 128.5   |
| ENSGALT0000 complement component 6 C6                   | 0.562993 | 0       |
| ENSGALT0000 chromosome 6 open reading frame C6H10orf11  | 0.970951 | 132     |
| ENSGALT0000 chromosome 6 open reading frame C6H10orf118 | 0.9978   | 783.5   |
| ENSGALT0000 chromosome 6 open reading frame C6H10orf137 | 0.96676  | 1014.98 |
| ENSGALT0000 chromosome 6 open reading frame C6H10orf26  | 0.937255 | 672     |
| ENSGALT0000 chromosome 6 open reading frame C6H10orf28  | 0.912072 | 300     |
| ENSGALT0000 chromosome 6 open reading frame C6H10orf32  | 0.863011 | 825.5   |
| ENSGALT0000 chromosome 6 open reading frame C6H10orf46  | 0.936442 | 475     |
| ENSGALT0000 chromosome 6 open reading frame C6H10orf57  | 0.939728 | 862     |
| ENSGALT0000 chromosome 6 open reading frame C6H10orf76  | 0.9385   | 1808.5  |
| ENSGALT0000 chromosome 6 open reading frame C6H10orf88  | 0.909252 | 971.5   |
| ENSGALT0000 chromosome 6 open reading frame C6H10orf96  | ?        | 0       |
| ENSGALT0000 chromosome 6 open reading frame C6orf115    | 0.38589  | 515     |
| ENSGALT0000 chromosome 6 open reading frame C6orf162    | 0.92333  | 187.5   |
| ENSGALT0000 chromosome 6 open reading frame C6orf170    | 0.985776 | 490.5   |
| ENSGALT0000 chromosome 6 open reading frame C6orf183    | 0.849633 | 2.5     |
| ENSGALT0000 chromosome 6 open reading frame C6orf94     | 0.999547 | 19.5    |
| ENSGALT0000 complement component 7 C7                   | 0.85177  | 9       |
| ENSGALT0000 chromosome 7 open reading frame C7H21orf58  | 0.166841 | 3.5     |
| ENSGALT0000 chromosome 7 open reading frame C7H2orf47   | 0.868555 | 1563    |
| ENSGALT0000 chromosome 7 open reading frame C7H2orf66   | 0.984358 | 14.5    |
| ENSGALT0000 \N C7H2orf69                                | 0.973228 | 455     |
| ENSGALT0000 chromosome 7 open reading frame C7H2orf76   | 0.979347 | 162     |
| ENSGALT0000 chromosome 7 open reading frame C7orf10     | 0.85183  | 75      |
| ENSGALT0000 chromosome 7 open reading frame C7orf25     | 0.958951 | 250.5   |
| ENSGALT0000 chromosome 7 open reading frame C7orf31     | ?        | 0       |
| ENSGALT0000 chromosome 7 open reading frame C7orf41     | 0.991373 | 199     |
| ENSGALT0000 chromosome 7 open reading frame C7orf45     | ?        | 0       |
| ENSGALT0000 chromosome 7 open reading frame C7orf58     | 0.988375 | 116.5   |
| ENSGALT0000 chromosome 7 open reading frame C7orf72     | 0.603682 | 0       |
| ENSGALT0000 complement component 8, alpha p C8A         | 0.649519 | 0.5     |

|                                                |            |          |         |
|------------------------------------------------|------------|----------|---------|
| ENSGALT0000 complement component 8, beta pol   | C8B        | 0.981202 | 43      |
| ENSGALT0000 complement component 8, gamma      | C8G        | 0.744744 | 168.946 |
| ENSGALT0000 chromosome 8 open reading frame    | C8H14orf80 | 0.884552 | 89      |
| ENSGALT0000 chromosome 8 open reading frame    | C8H1orf111 | 0.990861 | 51.5    |
| ENSGALT0000 chromosome 8 open reading frame    | C8H1orf112 | 0.955572 | 492.696 |
| ENSGALT0000 chromosome 8 open reading frame    | C8H1orf123 | 0.785273 | 519     |
| ENSGALT0000 chromosome 8 open reading frame    | C8H1orf146 | 0.828826 | 1       |
| ENSGALT0000 chromosome 8 open reading frame    | C8H1orf168 | 0.821318 | 7.5     |
| ENSGALT0000 chromosome 8 open reading frame    | C8H1orf21  | 0.808221 | 124.5   |
| ENSGALT0000 chromosome 8 open reading frame    | C8H1orf27  | 0.942102 | 718.5   |
| ENSGALT0000 chromosome 8 open reading frame    | C8H1orf52  | 0.739844 | 542.5   |
| ENSGALT0000 chromosome 8 open reading frame    | C8H1orf9   | 0.985153 | 1627.01 |
| ENSGALT0000 chromosome 8 open reading frame    | C8orf34    | 0.871381 | 12      |
| ENSGALT0000 chromosome 8 open reading frame    | C8orf37    | 0.880162 | 119.5   |
| ENSGALT0000 chromosome 8 open reading frame    | C8orf46    | 0.649519 | 1       |
| ENSGALT0000 chromosome 8 open reading frame    | C8orf48    | 0.982875 | 29      |
| ENSGALT0000 chromosome 9 open reading frame    | C9H21orf2  | 0.935628 | 1915.5  |
| ENSGALT0000 chromosome 9 open reading frame    | C9H2orf54  | 0.991082 | 78      |
| ENSGALT0000 chromosome 9 open reading frame    | C9H2orf82  | 0.778033 | 35.5    |
| ENSGALT0000 chromosome 9 open reading frame    | C9H3orf58  | 0.985005 | 850.5   |
| ENSGALT0000 chromosome 9 open reading frame    | C9orf102   | 0.994787 | 352.5   |
| ENSGALT0000 chromosome 9 open reading frame    | C9orf103   | 0.852497 | 189.5   |
| ENSGALT0000 chromosome 9 open reading frame    | C9orf140   | 0.974862 | 535     |
| ENSGALT0000 chromosome 9 open reading frame    | C9orf174   | 0.992908 | 350.053 |
| ENSGALT0000 chromosome 9 open reading frame    | C9orf21    | 0.969888 | 85.5    |
| ENSGALT0000 chromosome 9 open reading frame    | C9orf30    | 0.94587  | 278     |
| ENSGALT0000 chromosome 9 open reading frame    | C9orf5     | 0.967561 | 840     |
| ENSGALT0000 chromosome 9 open reading frame    | C9orf71    | ?        | 0       |
| ENSGALT0000 chromosome 9 open reading frame    | C9orf86    | 0.922132 | 1837    |
| ENSGALT0000 chromosome 9 open reading frame    | C9orf93    | 0.974795 | 222.5   |
| ENSGALT0000 chromosome 9 open reading frame    | C9orf96    | 0.985155 | 102.224 |
| ENSGALT0000 carbonic anhydrase X               | CA10       | 0.650766 | 97.5    |
| ENSGALT0000 carbonic anhydrase XII             | CA12       | 0.251995 | 4       |
| ENSGALT0000 carbonic anhydrase XIII            | CA13       | 0.623827 | 23      |
| ENSGALT0000 carbonic anhydrase II              | CA2        | 0.394085 | 358.5   |
| ENSGALT0000 carbonic anhydrase III, muscle spe | CA3        | 0.519089 | 22.5    |
| ENSGALT0000 carbonic anhydrase IV              | CA4        | 0.19245  | 0       |
| ENSGALT0000 carbonic anhydrase VB, mitochond   | CA5B       | 0.992114 | 314.322 |
| ENSGALT0000 carbonic anhydrase VI              | CA6        | 0.982551 | 15      |
| ENSGALT0000 carbonic anhydrase VII             | CA7        | 0.824984 | 13.5    |
| ENSGALT0000 carbonic anhydrase VIII            | CA8        | 0.858393 | 286     |
| ENSGALT0000 carbonic anhydrase IX              | CA9        | 0.745304 | 2735    |
| ENSGALT0000 calcium binding protein 39         | CAB39      | 0.961651 | 891     |
| ENSGALT0000 calcium binding protein 39-like    | CAB39L     | 0.747503 | 92.5    |
| ENSGALT0000 calcineurin binding protein 1      | CABIN1     | 0.983755 | 2899.5  |
| ENSGALT0000 Cdk5 and Abl enzyme substrate 1    | CABLES1    | 0.927624 | 197     |
| ENSGALT0000 calcium binding protein 1          | CABP1      | 0.761808 | 140.5   |
| ENSGALT0000 calcium binding protein 7          | CABP7      | 0.416421 | 98.5    |
| ENSGALT0000 calcium binding tyrosine-(Y)-phosp | CABYR      | 0.998838 | 25      |
| ENSGALT0000 cache domain containing 1          | CACHD1     | 0.943674 | 6863    |
| ENSGALT0000 calcium channel, voltage-depender  | CACNA1B    | 0.791009 | 2573.48 |
| ENSGALT0000 calcium channel, voltage-depender  | CACNA1D    | 0.834186 | 281.499 |
| ENSGALT0000 calcium channel, voltage-depender  | CACNA1E    | 0.862735 | 1848.53 |
| ENSGALT0000 calcium channel, voltage-depender  | CACNA1G    | 0.991225 | 2332.64 |
| ENSGALT0000 calcium channel, voltage-depender  | CACNA1H    | 0.933132 | 1105.23 |
| ENSGALT0000 calcium channel, voltage-depender  | CACNA1I    | 0.47846  | 678.661 |

|                                                            |           |          |         |
|------------------------------------------------------------|-----------|----------|---------|
| ENSGALT0000 calcium channel, voltage-depender              | CACNA2D1  | 0.94943  | 227     |
| ENSGALT0000 calcium channel, voltage-depender              | CACNA2D3  | 0.777573 | 174.5   |
| ENSGALT0000 calcium channel, voltage-depender              | CACNA2D4  | 0.830056 | 58      |
| ENSGALT0000 calcium channel, voltage-depender              | CACNB2    | 0.943047 | 248.499 |
| ENSGALT0000 calcium channel, voltage-depender              | CACNB4    | 0.943406 | 114.5   |
| ENSGALT0000 calcium channel, voltage-depender              | CACNG1    | 0.649519 | 0.5     |
| ENSGALT0000 calcium channel, voltage-depender              | CACNG2    | 0.744615 | 94.5    |
| ENSGALT0000 calcium channel, voltage-depender              | CACNG3    | 0.363212 | 28      |
| ENSGALT0000 calcium channel, voltage-depender              | CACNG4    | 0.630829 | 54.5    |
| ENSGALT0000 calcium channel, voltage-depender              | CACNG7    | 0.733903 | 284     |
| ENSGALT0000 calyculin binding protein                      | CACYBP    | 0.952051 | 842.5   |
| ENSGALT0000 carbamoyl-phosphate synthetase 2               | CAD       | 0.952694 | 296     |
| ENSGALT0000 cell adhesion molecule 1                       | CADM1     | 0.844055 | 4905.5  |
| ENSGALT0000 cell adhesion molecule 2                       | CADM2     | 0.974108 | 397     |
| ENSGALT0000 cell adhesion molecule 3                       | CADM3     | 0.176417 | 709     |
| ENSGALT0000 Ca <sup>++</sup> -dependent secretion activato | CADPS     | 0.715424 | 964.502 |
| ENSGALT0000 Ca <sup>++</sup> -dependent secretion activato | CADPS2    | 0.885722 | 546.5   |
| ENSGALT0000 calbindin 1, 28kDa                             | CALB1     | 0.369297 | 57      |
| ENSGALT0000 calbindin 2                                    | CALB2     | 0.052046 | 103     |
| ENSGALT0000 calcitonin-related polypeptide alpha           | CALCA     | 0.834935 | 1023.5  |
| ENSGALT0000 calcium binding and coiled-coil don            | CALCOCO2  | 0.995197 | 619.5   |
| ENSGALT0000 calcitonin receptor                            | CALCR     | 0.706903 | 4       |
| ENSGALT0000 calcitonin receptor-like                       | CALCRL    | 0.971641 | 506     |
| ENSGALT0000 caldesmon 1                                    | CALD1     | 0.93114  | 1391.98 |
| ENSGALT0000 calcium homeostasis modulator 1                | CALHM1    | 0.649519 | 0       |
| ENSGALT0000 calcium homeostasis modulator 2                | CALHM2    | 0.973259 | 33.5    |
| ENSGALT0000 calcium homeostasis modulator 3                | CALHM3    | 0.358817 | 3.5     |
| ENSGALT0000 calmodulin 2 (phosphorylase kinas              | CALM      | 0.517901 | 12100.3 |
| ENSGALT0000 calmodulin 1 (phosphorylase kinas              | CALM1     | 0.673625 | 9187.19 |
| ENSGALT0000 calmodulin-like 3                              | CALML3    | 0.353553 | 1       |
| ENSGALT0000 calmodulin-like 4                              | CALML4    | 0.352091 | 917     |
| ENSGALT0000 calneuron 1                                    | CALN1     | 0.876172 | 74      |
| ENSGALT0000 calreticulin 3                                 | CALR3     | 0.932771 | 10      |
| ENSGALT0000 calcium/calmodulin-dependent prot              | CAMK1D    | 0.597125 | 139     |
| ENSGALT0000 calcium/calmodulin-dependent prot              | CAMK1G    | 0.945605 | 44      |
| ENSGALT0000 calcium/calmodulin-dependent prot              | CAMK2A    | 0.655485 | 20      |
| ENSGALT0000 calcium/calmodulin-dependent prot              | CAMK2D    | 0.99615  | 2139.97 |
| ENSGALT0000 calcium/calmodulin-dependent prot              | CAMK2G    | 0.960802 | 797.499 |
| ENSGALT0000 calcium/calmodulin-dependent prot              | CAMK4     | 0.707102 | 467.753 |
| ENSGALT0000 calcium/calmodulin-dependent prot              | CAMKK1    | 0.857125 | 174     |
| ENSGALT0000 calcium/calmodulin-dependent prot              | CAMKK2    | 0.906122 | 1718    |
| ENSGALT0000 calmodulin-lysine N-methyltransfer             | CAMKMT    | 0.959709 | 150.5   |
| ENSGALT0000 calcium modulating ligand                      | CAMLG     | 0.875813 | 851.117 |
| ENSGALT0000 cathelicidin antimicrobial peptide             | CAMP      | 0.459243 | 2.5     |
| ENSGALT0000 calmodulin regulated spectrin-asso             | CAMSAP1   | 0.928195 | 1665    |
| ENSGALT0000 calmodulin regulated spectrin-asso             | CAMSAP1L1 | 0.941865 | 1219.5  |
| ENSGALT0000 calmodulin binding transcription act           | CAMTA1    | 0.920207 | 1969.5  |
| ENSGALT0000 cullin-associated and neddylation-c            | CAND1     | 0.943421 | 4295.5  |
| ENSGALT0000 cullin-associated and neddylation-c            | CAND2     | 0.963858 | 656.003 |
| ENSGALT0000 calcium activated nucleotidase 1               | CANT1     | 0.951768 | 393     |
| ENSGALT0000 calnexin                                       | CANX      | 0.973011 | 5070.85 |
| ENSGALT0000 CAP, adenylate cyclase-associated              | CAP2      | 0.856913 | 191.5   |
| ENSGALT0000 calpain 1, (mu/l) large subunit                | CAPN1     | 0.889715 | 3611.5  |
| ENSGALT0000 calpain 10                                     | CAPN10    | 0.808119 | 625.495 |
| ENSGALT0000 calpain 13                                     | CAPN13    | 0.831511 | 12      |
| ENSGALT0000 calpain 14                                     | CAPN14    | 0.649519 | 0.5     |

|                                                  |         |          |         |
|--------------------------------------------------|---------|----------|---------|
| ENSGALT0000 calpain 2, (m/II) large subunit      | CAPN2   | 0.698526 | 289.5   |
| ENSGALT0000 calpain 3, (p94)                     | CAPN3   | 0.482556 | 3       |
| ENSGALT0000 calpain 5                            | CAPN5   | 0.978574 | 724     |
| ENSGALT0000 calpain 6                            | CAPN6   | 0.994318 | 136.5   |
| ENSGALT0000 calpain 7                            | CAPN7   | 0.966062 | 952     |
| ENSGALT0000 calpain 8                            | CAPN8   | 0.897986 | 5.5     |
| ENSGALT0000 calpain 9                            | CAPN9   | 0.705723 | 5.5     |
| ENSGALT0000 cell cycle associated protein 1      | CAPRIN1 | 0.936271 | 14868   |
| ENSGALT0000 caprin family member 2               | CAPRIN2 | 0.974303 | 622     |
| ENSGALT0000 calcyphosine 2                       | CAPS2   | 0.957473 | 154.5   |
| ENSGALT0000 calcyphosine-like                    | CAPSL   | 0.633484 | 18      |
| ENSGALT0000 capping protein (actin filament) mu: | CAPZA1  | 0.885448 | 2874.03 |
| ENSGALT0000 capping protein (actin filament) mu: | CAPZA2  | 0.908521 | 3238.01 |
| ENSGALT0000 capping protein (actin filament) mu: | CAPZA3  | ?        | 0       |
| ENSGALT0000 capping protein (actin filament) mu: | CAPZB   | 0.715656 | 3760.65 |
| ENSGALT0000 caspase recruitment domain family    | CARD10  | 0.908834 | 431     |
| ENSGALT0000 caspase recruitment domain family    | CARD11  | 0.690273 | 46      |
| ENSGALT0000 caspase recruitment domain family    | CARD8   | 0.970594 | 32.5    |
| ENSGALT0000 caspase recruitment domain family    | CARD9   | 0.974911 | 185     |
| ENSGALT0000 calcium regulated heat stable prote  | CARHSP1 | 0.947814 | 596     |
| ENSGALT0000 carbohydrate kinase domain contai    | CARKD   | 0.991015 | 1422    |
| ENSGALT0000 cysteinyl-tRNA synthetase            | CARS    | 0.9639   | 1207.51 |
| ENSGALT0000 cysteinyl-tRNA synthetase 2, mitoc   | CARS2   | 0.950134 | 787.5   |
| ENSGALT0000 cancer susceptibility candidate 1    | CASC1   | 0.979796 | 103.5   |
| ENSGALT0000 cancer susceptibility candidate 3    | CASC3   | 0.848648 | 2976    |
| ENSGALT0000 cancer susceptibility candidate 4    | CASC4   | 0.945654 | 3159    |
| ENSGALT0000 CAS1 domain containing 1             | CASD1   | 0.943433 | 604.997 |
| ENSGALT0000 calcium/calmodulin-dependent seri    | CASK    | 0.986511 | 3400    |
| ENSGALT0000 CASK interacting protein 1           | CASKIN1 | 0.912427 | 1901.5  |
| ENSGALT0000 CASK interacting protein 2           | CASKIN2 | 0.993451 | 1062.96 |
| ENSGALT0000 caspase 1, apoptosis-related cystei  | CASP1   | 0.966215 | 723.004 |
| ENSGALT0000 initiator caspase                    | CASP18  | 0.79031  | 6       |
| ENSGALT0000 caspase 2, apoptosis-related cystei  | CASP2   | 0.972158 | 752.5   |
| ENSGALT0000 caspase 3, apoptosis-related cystei  | CASP3   | 0.744803 | 1699    |
| ENSGALT0000 caspase 6, apoptosis-related cystei  | CASP6   | 0.933114 | 539     |
| ENSGALT0000 caspase 7, apoptosis-related cystei  | CASP7   | 0.988297 | 40.5    |
| ENSGALT0000 caspase 8, apoptosis-related cystei  | CASP8   | 0.986095 | 417.5   |
| ENSGALT0000 caspase 9, apoptosis-related cystei  | CASP9   | 0.957898 | 641.92  |
| ENSGALT0000 calsequestrin 2 (cardiac muscle)     | CASQ2   | 0.57491  | 2       |
| ENSGALT0000 calcium-sensing receptor             | CASR    | 0.793629 | 46.5    |
| ENSGALT0000 Cas scaffolding protein family mem   | CASS4   | 0.586495 | 155.5   |
| ENSGALT0000 calpastatin                          | CAST    | 0.971554 | 359.999 |
| ENSGALT0000 catalase                             | CAT     | 0.990355 | 3656.47 |
| ENSGALT0000 caveolin 2                           | CAV2    | 0.846531 | 126     |
| ENSGALT0000 caveolin 3                           | CAV3    | 0.53482  | 1       |
| ENSGALT0000 core-binding factor, runt domain, al | CBFA2T2 | 0.922843 | 922.996 |
| ENSGALT0000 core-binding factor, runt domain, al | CBFA2T3 | 0.74997  | 333.501 |
| ENSGALT0000 core-binding factor, beta subunit    | CBFB    | 0.898941 | 744.001 |
| ENSGALT0000 Cas-Br-M (murine) ecotropic retrov   | CBL     | 0.936104 | 726.5   |
| ENSGALT0000 Cas-Br-M (murine) ecotropic retrov   | CBLB    | 0.967258 | 515.5   |
| ENSGALT0000 Cbl proto-oncogene, E3 ubiquitin p   | CBLL1   | 0.926632 | 1573    |
| ENSGALT0000 cerebellin 1 precursor               | CBLN1   | 0.548401 | 161     |
| ENSGALT0000 cerebellin 4 precursor               | CBLN4   | 0.753886 | 3737    |
| ENSGALT0000 carbonyl reductase 1                 | CBR1    | 0.959055 | 2074    |
| ENSGALT0000 carbonyl reductase 4                 | CBR4    | 0.995366 | 293.5   |
| ENSGALT0000 cystathionine-beta-synthase          | CBS     | 0.940636 | 723     |

|                                                  |          |          |         |
|--------------------------------------------------|----------|----------|---------|
| ENSGALT0000 COBW domain containing 1             | CBWD1    | 0.910853 | 498.003 |
| ENSGALT0000 chromobox homolog 1 (HP1 beta h      | CBX1     | 0.809351 | 3908.16 |
| ENSGALT0000 chromobox homolog 3                  | CBX3     | 0.948708 | 5853.36 |
| ENSGALT0000 chromobox homolog 4 (Pc class hc     | CBX4     | 0.698163 | 138.5   |
| ENSGALT0000 chromobox homolog 7                  | CBX7     | 0.983363 | 127.5   |
| ENSGALT0000 chromobox homolog 8                  | CBX8     | 0.894011 | 194     |
| ENSGALT0000 chibby homolog 1 (Drosophila)        | CBY1     | 0.719932 | 1518    |
| ENSGALT0000 coiled-coil and C2 domain containir  | CC2D1B   | 0.970618 | 1143.5  |
| ENSGALT0000 coiled-coil and C2 domain containir  | CC2D2A   | 0.991504 | 1739.49 |
| ENSGALT0000 cell division cycle and apoptosis re | CCAR1    | 0.947393 | 3307.92 |
| ENSGALT0000 collagen and calcium binding EGF     | CCBE1    | 0.95451  | 9.5     |
| ENSGALT0000 cysteine conjugate-beta lyase, cyto  | CCBL1    | 0.956636 | 509     |
| ENSGALT0000 cysteine conjugate-beta lyase 2      | CCBL2    | 0.997549 | 630     |
| ENSGALT0000 chemokine binding protein 2          | CCBP2    | 0.988623 | 26.5    |
| ENSGALT0000 coiled-coil domain containing 101    | CCDC101  | 0.770591 | 2115.51 |
| ENSGALT0000 coiled-coil domain containing 102A   | CCDC102A | 0.97569  | 423.5   |
| ENSGALT0000 coiled-coil domain containing 102B   | CCDC102B | 0.868245 | 4.5     |
| ENSGALT0000 coiled-coil domain containing 103    | CCDC103  | 0.468247 | 24.5    |
| ENSGALT0000 coiled-coil domain containing 104    | CCDC104  | 0.89077  | 640     |
| ENSGALT0000 coiled-coil domain containing 107    | CCDC107  | 0.685127 | 272.5   |
| ENSGALT0000 coiled-coil domain containing 108    | CCDC108  | 0.699683 | 3       |
| ENSGALT0000 coiled-coil domain containing 109B   | CCDC109B | 0.46114  | 223.5   |
| ENSGALT0000 coiled-coil domain containing 111    | CCDC111  | 0.989747 | 237.674 |
| ENSGALT0000 coiled-coil domain containing 112    | CCDC112  | 0.94331  | 101.5   |
| ENSGALT0000 coiled-coil domain containing 113    | CCDC113  | 0.967153 | 90      |
| ENSGALT0000 coiled-coil domain containing 117    | CCDC117  | 0.918058 | 187     |
| ENSGALT0000 coiled-coil domain containing 12     | CCDC12   | 0.726254 | 1648.5  |
| ENSGALT0000 coiled-coil domain containing 121    | CCDC121  | 0.603682 | 2       |
| ENSGALT0000 coiled-coil domain containing 122    | CCDC122  | 0.534404 | 0.5     |
| ENSGALT0000 coiled-coil domain containing 124    | CCDC124  | 0.818315 | 1222    |
| ENSGALT0000 coiled-coil domain containing 125    | CCDC125  | 0.991588 | 77      |
| ENSGALT0000 coiled-coil domain containing 126    | CCDC126  | 0.94855  | 219.5   |
| ENSGALT0000 coiled-coil domain containing 127    | CCDC127  | 0.978873 | 866     |
| ENSGALT0000 coiled-coil domain containing 13     | CCDC13   | 0.994427 | 215.5   |
| ENSGALT0000 coiled-coil domain containing 132    | CCDC132  | 0.966448 | 1093.49 |
| ENSGALT0000 coiled-coil domain containing 134    | CCDC134  | 0.89125  | 676     |
| ENSGALT0000 coiled-coil domain containing 135    | CCDC135  | 0.896149 | 105     |
| ENSGALT0000 coiled-coil domain containing 137    | CCDC137  | 0.664083 | 243.5   |
| ENSGALT0000 coiled-coil domain containing 14     | CCDC14   | 0.961893 | 438.5   |
| ENSGALT0000 coiled-coil domain containing 146    | CCDC146  | 0.980212 | 37      |
| ENSGALT0000 coiled-coil domain containing 147    | CCDC147  | 0.948139 | 66.5    |
| ENSGALT0000 coiled-coil domain containing 148    | CCDC148  | 0.969573 | 82.5    |
| ENSGALT0000 coiled-coil domain containing 149    | CCDC149  | 0.976597 | 194     |
| ENSGALT0000 coiled-coil domain containing 152    | CCDC152  | 0.603682 | 1       |
| ENSGALT0000 coiled-coil domain containing 153    | CCDC153  | 0        | 0       |
| ENSGALT0000 coiled-coil domain containing 157    | CCDC157  | 0.952033 | 104.5   |
| ENSGALT0000 coiled-coil domain containing 164    | CCDC164  | 0.887366 | 263     |
| ENSGALT0000 coiled-coil domain containing 165    | CCDC165  | 0.833566 | 4163.1  |
| ENSGALT0000 coiled-coil domain containing 167    | CCDC167  | 0.942952 | 652.5   |
| ENSGALT0000 coiled-coil domain containing 17     | CCDC17   | 0.962762 | 196.5   |
| ENSGALT0000 coiled-coil domain containing 18     | CCDC18   | 0.992722 | 303.5   |
| ENSGALT0000 coiled-coil domain containing 25     | CCDC25   | 0.881069 | 348.5   |
| ENSGALT0000 coiled-coil domain containing 27     | CCDC27   | 0.952829 | 246.5   |
| ENSGALT0000 coiled-coil domain containing 28A    | CCDC28A  | 0.929523 | 587     |
| ENSGALT0000 coiled-coil domain containing 28B    | CCDC28B  | 0.55373  | 156     |
| ENSGALT0000 coiled-coil domain containing 3      | CCDC3    | 0.14417  | 4       |

|                                               |         |          |         |
|-----------------------------------------------|---------|----------|---------|
| ENSGALT0000 coiled-coil domain containing 30  | CCDC30  | 0.985778 | 685.5   |
| ENSGALT0000 coiled-coil domain containing 34  | CCDC34  | 0.950346 | 265.5   |
| ENSGALT0000 coiled-coil domain containing 36  | CCDC36  | 0.780657 | 0.5     |
| ENSGALT0000 coiled-coil domain containing 37  | CCDC37  | 0.628455 | 4       |
| ENSGALT0000 coiled-coil domain containing 39  | CCDC39  | 0.933499 | 22      |
| ENSGALT0000 coiled-coil domain containing 40  | CCDC40  | 0.982615 | 246     |
| ENSGALT0000 coiled-coil domain containing 41  | CCDC41  | 0.977276 | 360.5   |
| ENSGALT0000 coiled-coil domain containing 42  | CCDC42  | ?        | 0       |
| ENSGALT0000 coiled-coil domain containing 43  | CCDC43  | 0.896263 | 1022.5  |
| ENSGALT0000 coiled-coil domain containing 47  | CCDC47  | 0.98384  | 1129.5  |
| ENSGALT0000 coiled-coil domain containing 48  | CCDC48  | 0.941245 | 137     |
| ENSGALT0000 coiled-coil domain containing 50  | CCDC50  | 0.859764 | 1457.5  |
| ENSGALT0000 coiled-coil domain containing 51  | CCDC51  | 0.91644  | 298.5   |
| ENSGALT0000 coiled-coil domain containing 53  | CCDC53  | 0.944028 | 344.5   |
| ENSGALT0000 coiled-coil domain containing 56  | CCDC56  | 0.19574  | 1618    |
| ENSGALT0000 coiled-coil domain containing 57  | CCDC57  | 0.998756 | 56      |
| ENSGALT0000 coiled-coil domain containing 58  | CCDC58  | 0.801412 | 220     |
| ENSGALT0000 coiled-coil domain containing 59  | CCDC59  | 0.780885 | 278     |
| ENSGALT0000 coiled-coil domain containing 6   | CCDC6   | 0.96838  | 1625.5  |
| ENSGALT0000 coiled-coil domain containing 60  | CCDC60  | 0.692088 | 71      |
| ENSGALT0000 coiled-coil domain containing 61  | CCDC61  | 0.763806 | 1822.03 |
| ENSGALT0000 coiled-coil domain containing 63  | CCDC63  | 0.603682 | 0.5     |
| ENSGALT0000 coiled-coil domain containing 64  | CCDC64  | 0.906162 | 159.5   |
| ENSGALT0000 coiled-coil domain containing 66  | CCDC66  | 0.966538 | 354.5   |
| ENSGALT0000 coiled-coil domain containing 67  | CCDC67  | 0.685935 | 4       |
| ENSGALT0000 coiled-coil domain containing 69  | CCDC69  | 0.698829 | 22      |
| ENSGALT0000 coiled-coil domain containing 71  | CCDC71  | 0.982308 | 713.5   |
| ENSGALT0000 coiled-coil domain containing 72  | CCDC72  | 0.349463 | 1861.5  |
| ENSGALT0000 coiled-coil domain containing 73  | CCDC73  | 0.983743 | 41      |
| ENSGALT0000 coiled-coil domain containing 75  | CCDC75  | 0.919391 | 575.5   |
| ENSGALT0000 coiled-coil domain containing 76  | CCDC76  | 0.965814 | 237.239 |
| ENSGALT0000 coiled-coil domain containing 77  | CCDC77  | 0.954662 | 210     |
| ENSGALT0000 coiled-coil domain containing 78  | CCDC78  | 0.556807 | 96      |
| ENSGALT0000 coiled-coil domain containing 79  | CCDC79  | 0.93182  | 29.5    |
| ENSGALT0000 coiled-coil domain containing 80  | CCDC80  | 0.939192 | 2225.13 |
| ENSGALT0000 coiled-coil domain containing 81  | CCDC81  | 0.982868 | 742.011 |
| ENSGALT0000 coiled-coil domain containing 82  | CCDC82  | 0.680821 | 341     |
| ENSGALT0000 coiled-coil domain containing 83  | CCDC83  | 0.980034 | 28      |
| ENSGALT0000 coiled-coil domain containing 84  | CCDC84  | 0.985517 | 204.5   |
| ENSGALT0000 coiled-coil domain containing 85A | CCDC85A | 0.959701 | 328.001 |
| ENSGALT0000 coiled-coil domain containing 85C | CCDC85C | 0.977589 | 760     |
| ENSGALT0000 coiled-coil domain containing 86  | CCDC86  | 0.434956 | 584     |
| ENSGALT0000 coiled-coil domain containing 88A | CCDC88A | 0.895259 | 2291.5  |
| ENSGALT0000 coiled-coil domain containing 88C | CCDC88C | 0.985741 | 6177.91 |
| ENSGALT0000 coiled-coil domain containing 89  | CCDC89  | 0.902038 | 29.5    |
| ENSGALT0000 coiled-coil domain containing 90A | CCDC90A | 0.861982 | 150.5   |
| ENSGALT0000 coiled-coil domain containing 90B | CCDC90B | 0.790553 | 426.5   |
| ENSGALT0000 coiled-coil domain containing 91  | CCDC91  | 0.981468 | 162     |
| ENSGALT0000 coiled-coil domain containing 92  | CCDC92  | 0.846448 | 427.5   |
| ENSGALT0000 coiled-coil domain containing 93  | CCDC93  | 0.934791 | 521.5   |
| ENSGALT0000 coiled-coil domain containing 99  | CCDC99  | 0.978938 | 638     |
| ENSGALT0000 cholecystokinin                   | CCK     | 0.482693 | 28      |
| ENSGALT0000 cholecystokinin A receptor        | CCKAR   | 0.534404 | 1.5     |
| ENSGALT0000 cholecystokinin B receptor        | CCKBR   | 0.977477 | 76      |
| ENSGALT0000 chemokine (C-C motif) ligand 1    | CCL1    | 0.464758 | 0.5     |
| ENSGALT0000 chemokine (C-C motif) ligand 17   | CCL17   | 0.22713  | 8       |



|                                                   |            |           |          |
|---------------------------------------------------|------------|-----------|----------|
| ENSGALT0000 chemokine (C-C motif) ligand 20       | CCL20      | 0.734344  | 1.5      |
| ENSGALT0000 chemokine (C-C motif) ligand 4        | CCL4       | 0.0869347 | 0.01959  |
| ENSGALT0000 C-C motif chemokine 4 homolog [S      | CCL4_CHICK | 0.464758  | 0.48041  |
| ENSGALT0000 chemokine (C-C motif) ligand 5        | CCL5       | 0.464758  | 0        |
| ENSGALT0000 chemokine                             | CCL10      | 0.640925  | 22.7193  |
| ENSGALT0000 chemokine                             | CCL15      | 0.464758  | 0        |
| ENSGALT0000 chemokine                             | CCL17      | 0.36726   | 9.2897   |
| ENSGALT0000 chemokine                             | CCL18      | 0.558956  | 1.08E-20 |
| ENSGALT0000 cerebral cavernous malformation 2     | CCM2       | 0.917824  | 863      |
| ENSGALT0000 cyclin A1                             | CCNA1      | 0.65978   | 19       |
| ENSGALT0000 cyclin A2                             | CCNA2      | 0.892986  | 1438.01  |
| ENSGALT0000 cyclin B2                             | CCNB2      | 0.780268  | 3322.9   |
| ENSGALT0000 cyclin C                              | CCNC       | 0.984494  | 499.503  |
| ENSGALT0000 cyclin D1                             | CCND1      | 0.994993  | 2647.5   |
| ENSGALT0000 cyclin D2                             | CCND2      | 0.982363  | 989.5    |
| ENSGALT0000 cyclin D3                             | CCND3      | 0.976195  | 704      |
| ENSGALT0000 cyclin D-type binding-protein 1       | CCNDBP1    | 0.886248  | 1348     |
| ENSGALT0000 cyclin E1                             | CCNE1      | 0.976854  | 353      |
| ENSGALT0000 cyclin E2                             | CCNE2      | 0.92608   | 252      |
| ENSGALT0000 cyclin F                              | CCNF       | 0.934908  | 1282     |
| ENSGALT0000 cyclin G1                             | CCNG1      | 0.90478   | 980      |
| ENSGALT0000 cyclin G2                             | CCNG2      | 0.970265  | 847.5    |
| ENSGALT0000 cyclin H                              | CCNH       | 0.802269  | 1154     |
| ENSGALT0000 cyclin I                              | CCNI       | 0.88442   | 7475.58  |
| ENSGALT0000 cyclin I family, member 2             | CCNI2      | 0.957647  | 347.748  |
| ENSGALT0000 cyclin J                              | CCNJ       | 0.955205  | 312.5    |
| ENSGALT0000 cyclin J-like                         | CCNJL      | 0.953148  | 215.5    |
| ENSGALT0000 cyclin K                              | CCNK       | 0.92683   | 1121.5   |
| ENSGALT0000 cyclin L1                             | CCNL1      | 0.950873  | 1143.5   |
| ENSGALT0000 cyclin L2                             | CCNL2      | 0.98488   | 2463.43  |
| ENSGALT0000 cyclin T2                             | CCNT2      | 0.973983  | 924.5    |
| ENSGALT0000 cyclin Y                              | CCNY       | 0.999711  | 331.5    |
| ENSGALT0000 cyclin Y-like 1                       | CCNYL1     | 0.939893  | 1283.5   |
| ENSGALT0000 centriolar coiled coil protein 110kDa | CCP110     | 0.89803   | 734.001  |
| ENSGALT0000 cell cycle progression 1              | CCPG1      | 0.99021   | 1743.15  |
| ENSGALT0000 chemokine (C-C motif) receptor 2      | CCR2       | 0.45147   | 1.12E-05 |
| ENSGALT0000 chemokine (C-C motif) receptor 4      | CCR4       | 0.938545  | 6.5      |
| ENSGALT0000 chemokine (C-C motif) receptor 5 (    | CCR5       | 0.915138  | 8.49999  |
| ENSGALT0000 chemokine (C-C motif) receptor 8      | CCR8       | 0.825884  | 7.5      |
| ENSGALT0000 C-C chemokine receptor 8 like         | CCR8-L     | 0.649519  | 0.5      |
| ENSGALT0000 chemokine (C-C motif) receptor 9      | CCR9       | ?         | 0        |
| ENSGALT0000 chemokine (C-C motif) receptor-like   | CCRL1      | 0.948741  | 9.5      |
| ENSGALT0000 CCR4 carbon catabolite repression     | CCRN4L     | 0.920171  | 428      |
| ENSGALT0000 chaperonin containing TCP1, subu      | CCT2       | 0.739851  | 6184     |
| ENSGALT0000 chaperonin containing TCP1, subu      | CCT4       | 0.833911  | 8616.64  |
| ENSGALT0000 chaperonin containing TCP1, subu      | CCT5       | 0.797018  | 8112.14  |
| ENSGALT0000 chaperonin containing TCP1, subu      | CCT6A      | 0.725809  | 7178     |
| ENSGALT0000 chaperonin containing TCP1, subu      | CCT7       | 0.819298  | 10625.3  |
| ENSGALT0000 chaperonin containing TCP1, subu      | CCT8       | 0.882133  | 7128.85  |
| ENSGALT0000 CCZ1 vacuolar protein trafficking a   | CCZ1       | 0.955496  | 1039.5   |
| ENSGALT0000 CD101 molecule                        | CD101      | 0.990931  | 168.832  |
| ENSGALT0000 CD109 molecule                        | CD109      | 0.969402  | 354.498  |
| ENSGALT0000 CD14 molecule                         | CD14       | 0.773802  | 27.5     |
| ENSGALT0000 CD151 molecule (Raph blood grou       | CD151      | 0.982452  | 5323.07  |
| ENSGALT0000 CD164 molecule, sialomucin            | CD164      | 0.99747   | 1674.49  |
| ENSGALT0000 CD180 molecule                        | CD180      | 0.750029  | 2.5      |

|                                                                  |           |           |         |
|------------------------------------------------------------------|-----------|-----------|---------|
| ENSGALT0000 CD2 molecule                                         | CD2       | 0.649519  | 0.5     |
| ENSGALT0000 CD200 molecule                                       | CD200     | 0.841954  | 216     |
| ENSGALT0000 CD200 receptor 1                                     | CD200R1   | 0.983868  | 67      |
| ENSGALT0000 CD226 molecule                                       | CD226     | 0.943934  | 2.5     |
| ENSGALT0000 CD247 molecule                                       | CD247     | 0.748254  | 81      |
| ENSGALT0000 CD274 molecule                                       | CD274     | 0.978688  | 28.5    |
| ENSGALT0000 CD276 molecule                                       | CD276     | 0.752418  | 2875.5  |
| ENSGALT0000 CD28 molecule                                        | CD28      | 0.821187  | 0.5     |
| ENSGALT0000 CD2-associated protein                               | CD2AP     | 0.970293  | 1265.99 |
| ENSGALT0000 CD300a molecule                                      | CD300A    | 0.973315  | 72.8812 |
| ENSGALT0000 CD300 antigen-like family member                     | CD300L-S1 | 0.649519  | 0.5     |
| ENSGALT0000 CD320 molecule                                       | CD320     | 0.788895  | 469.999 |
| ENSGALT0000 CD34 molecule                                        | CD34      | 0.781443  | 199     |
| ENSGALT0000 CD36 antigen                                         | CD36      | 0.467007  | 9.5     |
| ENSGALT0000 CD38 molecule                                        | CD38      | 0.968502  | 190     |
| ENSGALT0000 CD3d molecule, delta (CD3-TCR $\alpha$ )             | CD3D      | 0.157622  | 33      |
| ENSGALT0000 CD3e molecule, epsilon (CD3-TCR                      | CD3E      | 0.975411  | 2526.5  |
| ENSGALT0000 CD4 molecule                                         | CD4       | 0.690817  | 6.5     |
| ENSGALT0000 CD40 molecule, TNF receptor superfamily              | CD40      | 0.993357  | 323.499 |
| ENSGALT0000 CD40 ligand                                          | CD40LG    | ?         | 0       |
| ENSGALT0000 CD44 molecule (Indian blood group)                   | CD44      | 0.950291  | 102     |
| ENSGALT0000 CD47 molecule                                        | CD47      | 0.85395   | 1851.01 |
| ENSGALT0000 CD5 molecule                                         | CD5       | 0.904865  | 13.5    |
| ENSGALT0000 CD55 molecule, decay accelerating                    | CD55      | 0.987813  | 55.5    |
| ENSGALT0000 CD59 molecule, complement regulatory                 | CD59      | 0.98942   | 590     |
| ENSGALT0000 CD7 molecule                                         | CD7       | ?         | 0       |
| ENSGALT0000 CD72 molecule                                        | CD72      | 0.0375599 | 0.5     |
| ENSGALT0000 CD74 molecule, major histocompatibility              | CD74      | 0.999316  | 1220.51 |
| ENSGALT0000 CD79b molecule, immunoglobulin $\alpha$              | CD79B     | 0.957171  | 65      |
| ENSGALT0000 CD80 molecule                                        | CD80      | 0.939217  | 28.5    |
| ENSGALT0000 CD81 molecule                                        | CD81      | 0.819109  | 3724.52 |
| ENSGALT0000 CD82 antigen                                         | CD82      | 0.846363  | 2339.5  |
| ENSGALT0000 CD86 molecule                                        | CD86      | 0.464758  | 0.5     |
| ENSGALT0000 CD8a molecule                                        | CD8A      | 0.604477  | 6.5     |
| ENSGALT0000 CD8b molecule                                        | CD8B      | 0.580649  | 0       |
| ENSGALT0000 CD9 molecule                                         | CD9       | 0.924598  | 127.5   |
| ENSGALT0000 CD93 molecule                                        | CD93      | 0.816202  | 328     |
| ENSGALT0000 CD99 molecule                                        | CD99      | 0.984541  | 527.5   |
| ENSGALT0000 CD99 molecule-like 2                                 | CD99L2    | 0.773649  | 700     |
| ENSGALT0000 cytidine deaminase                                   | CDA       | 0.96654   | 174.312 |
| ENSGALT0000 cytidine and dCMP deaminase domain                   | CDADC1    | 0.988042  | 96.9999 |
| ENSGALT0000 congenital dyserythropoietic anemia                  | CDAN1     | 0.971176  | 742     |
| ENSGALT0000 cell division cycle 123 homolog (S. cerevisiae)      | CDC123    | 0.915323  | 814     |
| ENSGALT0000 CDC14 cell division cycle 14 homolog (S. cerevisiae) | CDC14A    | 0.97458   | 1701    |
| ENSGALT0000 CDC14 cell division cycle 14 homolog (S. cerevisiae) | CDC14B    | 0.97521   | 229     |
| ENSGALT0000 cell division cycle 16 homolog (S. cerevisiae)       | CDC16     | 0.96117   | 682.5   |
| ENSGALT0000 cell division cycle 20 homolog (S. cerevisiae)       | CDC20     | 0.751593  | 2002    |
| ENSGALT0000 cell division cycle 23 homolog (S. cerevisiae)       | CDC23     | 0.941565  | 1721    |
| ENSGALT0000 cell division cycle 25 homolog A (S. cerevisiae)     | CDC25A    | 0.888369  | 469.5   |
| ENSGALT0000 cell division cycle 26 homolog (S. cerevisiae)       | CDC26     | 0.125357  | 784.5   |
| ENSGALT0000 cell division cycle 27 homolog (S. cerevisiae)       | CDC27     | 0.97573   | 3074.5  |
| ENSGALT0000 cell division cycle 2-like 1 (PITSLR1)               | CDC2L1    | 0.908726  | 1302.5  |
| ENSGALT0000 cell division cycle 34 homolog (S. cerevisiae)       | CDC34     | 0.920348  | 958     |
| ENSGALT0000 cell division cycle 37 homolog (S. cerevisiae)       | CDC37L1   | 0.924303  | 301.5   |
| ENSGALT0000 cell division cycle 40 homolog (S. cerevisiae)       | CDC40     | 0.930811  | 1262.5  |
| ENSGALT0000 cell division cycle 42 (GTP binding)                 | CDC42     | 0.918934  | 8320.84 |

|                                                          |          |         |
|----------------------------------------------------------|----------|---------|
| ENSGALT0000 CDC42 binding protein kinase alpha CDC42BPA  | 0.981142 | 1931.5  |
| ENSGALT0000 CDC42 binding protein kinase beta CDC42BPB   | 0.960039 | 5103    |
| ENSGALT0000 CDC42 effector protein (Rho GTPa) CDC42EP3   | 0.941304 | 114.5   |
| ENSGALT0000 CDC42 effector protein (Rho GTPa) CDC42EP4   | 0.83406  | 1604    |
| ENSGALT0000 CDC42 small effector 2 CDC42SE2              | 0.843888 | 217     |
| ENSGALT0000 cell division cycle 45 homolog (S. c) CDC45  | 0.926419 | 636.5   |
| ENSGALT0000 CDC5 cell division cycle 5-like (S. r) CDC5L | 0.945747 | 3449.51 |
| ENSGALT0000 cell division cycle 7 homolog (S. ce) CDC7   | 0.935208 | 222     |
| ENSGALT0000 cell division cycle 73, Paf1/RNA pol CDC73   | 0.936703 | 1319.5  |
| ENSGALT0000 cell division cycle associated 2 CDCA2       | 0.865573 | 272.5   |
| ENSGALT0000 cell division cycle associated 3 CDCA3       | 0.746405 | 1256.5  |
| ENSGALT0000 cell division cycle associated 4 CDCA4       | 0.994443 | 749.5   |
| ENSGALT0000 cell division cycle associated 7 CDCA7       | 0.933267 | 698.434 |
| ENSGALT0000 cell division cycle associated 7-like CDCA7L | 0.968155 | 1178    |
| ENSGALT0000 CUB domain containing protein 1 CDCP1        | 0.968138 | 725.5   |
| ENSGALT0000 CUB domain containing protein 2 CDCP2        | 0.673017 | 75.4213 |
| ENSGALT0000 cytidine deaminase CDD                       | 0.667159 | 9.00216 |
| ENSGALT0000 cadherin 1, type 1, E-cadherin (epit) CDH1   | 0.915627 | 12274.7 |
| ENSGALT0000 cadherin 10, type 2 (T2-cadherin) CDH10      | 0.659422 | 57      |
| ENSGALT0000 cadherin 11, type 2, OB-cadherin (c) CDH11   | 0.985777 | 7706.99 |
| ENSGALT0000 cadherin 12, type 2 (N-cadherin 2) CDH12     | 0.674293 | 219     |
| ENSGALT0000 cadherin 13, H-cadherin (heart) CDH13        | 0.57851  | 1299.01 |
| ENSGALT0000 cadherin 17, LI cadherin (liver-intes) CDH17 | 0.551223 | 41.5    |
| ENSGALT0000 cadherin 18, type 2 CDH18                    | 0.852536 | 166.5   |
| ENSGALT0000 cadherin 19, type 2 CDH19                    | 0.958734 | 123.5   |
| ENSGALT0000 cadherin 2, type 1, N-cadherin (neu) CDH2    | 0.965193 | 10117.5 |
| ENSGALT0000 cadherin 20, type 2 CDH20                    | 0.731866 | 16.5    |
| ENSGALT0000 cadherin 22, type 2 CDH22                    | 0.834669 | 54      |
| ENSGALT0000 cadherin-related 23 CDH23                    | 0.609516 | 122     |
| ENSGALT0000 cadherin 4, type 1, R-cadherin (reti) CDH4   | 0.795928 | 1681.5  |
| ENSGALT0000 cadherin 5, type 2 (vascular endoth) CDH5    | 0.827533 | 1054.5  |
| ENSGALT0000 cadherin 6, type 2, K-cadherin (feta) CDH6   | 0.85996  | 200.999 |
| ENSGALT0000 cadherin 7, type 2 CDH7                      | 0.825695 | 474.5   |
| ENSGALT0000 cadherin 8, type 2 CDH8                      | 0.98666  | 245.5   |
| ENSGALT0000 cadherin 9, type 2 (T1-cadherin) CDH9        | 0.880071 | 49.5    |
| ENSGALT0000 cadherin-related family member 1 CDHR1       | 0.602902 | 8.5     |
| ENSGALT0000 cadherin-related family member 2 CDHR2       | 0.937045 | 77.5    |
| ENSGALT0000 cadherin-related family member 3 CDHR3       | 0.99194  | 48      |
| ENSGALT0000 cadherin-related family member 5 CDHR5       | 0.603682 | 0       |
| ENSGALT0000 cyclin-dependent kinase 1 CDK1               | 0.77679  | 2471.5  |
| ENSGALT0000 cyclin-dependent kinase 10 CDK10             | 0.918475 | 981.5   |
| ENSGALT0000 cyclin-dependent kinase 12 CDK12             | 0.973443 | 2111.5  |
| ENSGALT0000 cyclin-dependent kinase 13 CDK13             | 0.987547 | 1891    |
| ENSGALT0000 cyclin-dependent kinase 14 CDK14             | 0.883876 | 958.5   |
| ENSGALT0000 cyclin-dependent kinase 15 CDK15             | 0.930904 | 56.5    |
| ENSGALT0000 cyclin-dependent kinase 17 CDK17             | 0.940736 | 934.5   |
| ENSGALT0000 cyclin-dependent kinase 19 CDK19             | 0.991967 | 497     |
| ENSGALT0000 cyclin-dependent kinase 2 associat CDK2AP1   | 0.941344 | 756.5   |
| ENSGALT0000 cyclin-dependent kinase 3 CDK3               | 0.876691 | 7       |
| ENSGALT0000 CDK5 regulatory subunit associate CDK5RAP1   | 0.963087 | 1138.5  |
| ENSGALT0000 CDK5 regulatory subunit associate CDK5RAP2   | 0.989299 | 1661.48 |
| ENSGALT0000 CDK5 regulatory subunit associate CDK5RAP3   | 0.734303 | 125     |
| ENSGALT0000 cyclin-dependent kinase 6 CDK6               | 0.965321 | 859.5   |
| ENSGALT0000 cyclin-dependent kinase 7 CDK7               | 0.884944 | 359     |
| ENSGALT0000 cyclin-dependent kinase 8 CDK8               | 0.939996 | 1233.5  |
| ENSGALT0000 cyclin-dependent kinase 9 CDK9               | 0.894061 | 2457.5  |

|                                                    |             |          |         |
|----------------------------------------------------|-------------|----------|---------|
| ENSGALT0000 CDK5 regulatory subunit associate      | CDKAL1      | 0.962151 | 533.499 |
| ENSGALT0000 cyclin-dependent kinase-like 1 (CD     | CDKL1       | 0.850864 | 226     |
| ENSGALT0000 cyclin-dependent kinase-like 2 (CD     | CDKL2       | 0.904678 | 348.293 |
| ENSGALT0000 cyclin-dependent kinase-like 5         | CDKL5       | 0.997696 | 305.5   |
| ENSGALT0000 cyclin-dependent kinase inhibitor 1,   | CDKN1A      | 0.35443  | 3       |
| ENSGALT0000 cyclin-dependent kinase inhibitor 1    | CDKN1B      | 0.921585 | 1743    |
| ENSGALT0000 CDKN2A interacting protein             | CDKN2AIP    | 0.910954 | 879     |
| ENSGALT0000 cyclin-dependent kinase inhibitor 2    | CDKN2C      | 0.644614 | 11      |
| ENSGALT0000 cyclin-dependent kinase inhibitor 3    | CDKN3       | 0.78805  | 351.5   |
| ENSGALT0000 cysteine dioxygenase, type I           | CDO1        | 0.854368 | 1006    |
| ENSGALT0000 Cdon homolog (mouse)                   | CDON        | 0.996755 | 2721    |
| ENSGALT0000 cerebellar degeneration-related prc    | CDR2        | 0.925001 | 681.5   |
| ENSGALT0000 cerebellar degeneration-related prc    | CDR2L       | 0.939164 | 840     |
| ENSGALT0000 CDP-diacylglycerol synthase (phos      | CDS1        | 0.989586 | 301.5   |
| ENSGALT0000 CDP-diacylglycerol synthase (phos      | CDS2        | 0.967373 | 1059.5  |
| ENSGALT0000 chromatin licensing and DNA replic     | CDT1        | 0.843931 | 1070    |
| ENSGALT0000 CDV3 homolog                           | CDV3        | 0.934573 | 799     |
| ENSGALT0000 caudal type homeobox 1                 | CDX1        | 0.464758 | 1       |
| ENSGALT0000 caudal type homeo box transcriptio     | CDX2        | ?        | 0       |
| ENSGALT0000 caudal type homeobox 4                 | CDX4        | 0.603682 | 1       |
| ENSGALT0000 chromodomain protein, Y-like           | CDYL        | 0.992949 | 339     |
| ENSGALT0000 chromodomain protein, Y-like 2         | CDYL2       | 0.890471 | 276     |
| ENSGALT0000 UPF0542 protein C5orf43 homolog        | CE043_CHICK | 0.968492 | 1748    |
| ENSGALT0000 CCAAT/enhancer binding protein ((      | CEBPB       | 0.883321 | 23.5    |
| ENSGALT0000 CCAAT/enhancer binding protein ((      | CEBPG       | 0.923295 | 2004    |
| ENSGALT0000 CCAAT/enhancer binding protein ((      | CEBPZ       | 0.873272 | 1036.01 |
| ENSGALT0000 cat eye syndrome chromosome reç        | CECR1       | 0.95381  | 275.999 |
| ENSGALT0000 cat eye syndrome chromosome reç        | CECR2       | 0.898207 | 1026.5  |
| ENSGALT0000 cat eye syndrome chromosome reç        | CECR5       | 0.954308 | 400     |
| ENSGALT0000 carboxyl ester lipase (bile salt-stimi | CEL         | 0.464758 | 0       |
| ENSGALT0000 chymotrypsin-like elastase family, r   | CELA1       | 0.824704 | 12      |
| ENSGALT0000 chymotrypsin-like elastase family, r   | CELA2A      | 0.917094 | 16.5    |
| ENSGALT0000 CUGBP, Elav-like family member 1       | CELF1       | 0.973998 | 1406.99 |
| ENSGALT0000 CUGBP, Elav-like family member 2       | CELF2       | 0.963279 | 684     |
| ENSGALT0000 CUGBP, Elav-like family member 4       | CELF4       | 0.643132 | 46.5    |
| ENSGALT0000 CUGBP, Elav-like family member 5       | CELF5       | 0.893896 | 149.5   |
| ENSGALT0000 cadherin, EGF LAG seven-pass G-        | CELSR3      | 0.854602 | 2037.5  |
| ENSGALT0000 cell cycle exit and neuronal differen  | CEND1       | 0.690174 | 116.5   |
| ENSGALT0000 centromere protein C 1                 | CENPC1      | 0.947785 | 386.5   |
| ENSGALT0000 centromere protein F, 350/400kDa       | CENPF       | 0.93638  | 951.002 |
| ENSGALT0000 centromere protein H                   | CENPH       | 0.817975 | 886     |
| ENSGALT0000 centromere protein I                   | CENPI       | 0.967766 | 553.502 |
| ENSGALT0000 centromere protein J                   | CENPJ       | 0.992266 | 140.5   |
| ENSGALT0000 centromere protein K                   | CENPK       | 0.866899 | 278.001 |
| ENSGALT0000 centromere protein M                   | CENPM       | 0.725054 | 149.5   |
| ENSGALT0000 centromere protein N                   | CENPN       | 0.905997 | 167     |
| ENSGALT0000 centromere protein O                   | CENPO       | 0.968676 | 1264.52 |
| ENSGALT0000 centromere protein P                   | CENPP       | 0.810881 | 261     |
| ENSGALT0000 centromere protein Q                   | CENPQ       | 0.948479 | 467.501 |
| ENSGALT0000 centromere protein T                   | CENPT       | 0.88803  | 339.056 |
| ENSGALT0000 centromere protein V                   | CENPV       | 0.495088 | 358.5   |
| ENSGALT0000 centrosomal protein 104kDa             | CEP104      | 0.992441 | 996.494 |
| ENSGALT0000 centrosomal protein 112kDa             | CEP112      | 0.893598 | 203.5   |
| ENSGALT0000 centrosomal protein 120kDa             | CEP120      | 0.953494 | 355     |
| ENSGALT0000 centrosomal protein 135kDa             | CEP135      | 0.961301 | 241     |
| ENSGALT0000 centrosomal protein 152kDa             | CEP152      | 0.972002 | 220.5   |

|                                                         |         |          |         |
|---------------------------------------------------------|---------|----------|---------|
| ENSGALT0000 centrosomal protein 164kDa                  | CEP164  | 0.999308 | 595.5   |
| ENSGALT0000 centrosomal protein 170kDa                  | CEP170  | 0.813655 | 1734.02 |
| ENSGALT0000 centrosomal protein 19kDa                   | CEP19   | 0.920591 | 262.5   |
| ENSGALT0000 centrosomal protein 192kDa                  | CEP192  | 0.90749  | 342.5   |
| ENSGALT0000 centrosomal protein 250kDa                  | CEP250  | 0.930623 | 485.5   |
| ENSGALT0000 centrosomal protein 290kDa                  | CEP290  | 0.969472 | 645     |
| ENSGALT0000 centrosomal protein 350kDa                  | CEP350  | 0.978327 | 1294.5  |
| ENSGALT0000 centrosomal protein 44kDa                   | CEP44   | 0.977411 | 204.5   |
| ENSGALT0000 centrosomal protein 55kDa                   | CEP55   | 0.901499 | 92      |
| ENSGALT0000 centrosomal protein 57kDa                   | CEP57   | 0.979616 | 529.5   |
| ENSGALT0000 centrosomal protein 57kDa-like 1            | CEP57L1 | 0.945488 | 11      |
| ENSGALT0000 centrosomal protein 63kDa                   | CEP63   | 0.943671 | 611     |
| ENSGALT0000 centrosomal protein 68kDa                   | CEP68   | 0.972287 | 1265    |
| ENSGALT0000 centrosomal protein 70kDa                   | CEP70   | 0.93758  | 1055.5  |
| ENSGALT0000 centrosomal protein 76kDa                   | CEP76   | 0.979421 | 512.828 |
| ENSGALT0000 centrosomal protein 78kDa                   | CEP78   | 0.969539 | 278     |
| ENSGALT0000 centrosomal protein 85kDa                   | CEP85   | 0.967118 | 741.5   |
| ENSGALT0000 centrosomal protein 85kDa-like              | CEP85L  | 0.86181  | 298     |
| ENSGALT0000 centrosomal protein 89kDa                   | CEP89   | 0.986929 | 322     |
| ENSGALT0000 centrosomal protein 95kDa                   | CEP95   | 0.963876 | 532.5   |
| ENSGALT0000 centrosomal protein 97kDa                   | CEP97   | 0.974383 | 356.5   |
| ENSGALT0000 choline/ethanolamine phosphotransferase     | CEPT1   | 0.956136 | 1030.5  |
| ENSGALT0000 cerberus 1, cysteine knot superfamily       | CER1    | ?        | 0       |
| ENSGALT0000 cerebral endothelial cell adhesion receptor | CERCAM  | 0.967198 | 625     |
| ENSGALT0000 ceramide kinase                             | CERK    | 0.959298 | 995.244 |
| ENSGALT0000 ceramide kinase-like                        | CERKL   | 0.554736 | 158.5   |
| ENSGALT0000 ceramide synthase 1                         | CERS1   | 0.837849 | 935     |
| ENSGALT0000 ceramide synthase 3                         | CERS3   | 0.932661 | 59.5    |
| ENSGALT0000 ceramide synthase 5                         | CERS5   | 0.908392 | 1311    |
| ENSGALT0000 ceramide synthase 6                         | CERS6   | 0.980367 | 490.5   |
| ENSGALT0000 carboxylesterase 1 (monocyte/macrophage)    | CES1    | 0.983982 | 182.583 |
| ENSGALT0000 centrin, EF-hand protein, 1                 | CETN1   | 0.981615 | 305.5   |
| ENSGALT0000 centrin, EF-hand protein, 2                 | CETN2   | 0.979021 | 891     |
| ENSGALT0000 centrin, EF-hand protein, 3                 | CETN3   | 0.774375 | 472     |
| ENSGALT0000 cholesteryl ester transfer protein, plasma  | CETP    | 1        | 0.5     |
| ENSGALT0000 cripto, FRL-1, cryptic family 1B            | CFC1B   | 0.558923 | 35.5    |
| ENSGALT0000 craniofacial development protein 1          | CFDP1   | 0.560385 | 1577.34 |
| ENSGALT0000 complement factor H                         | CFH     | 0.72878  | 48.5    |
| ENSGALT0000 complement factor I                         | CFI     | 0.975272 | 54      |
| ENSGALT0000 cofilin 2 (muscle)                          | CFL2    | 0.79514  | 1699.5  |
| ENSGALT0000 CASP8 and FADD-like apoptosis receptor      | CFLAR   | 0.954194 | 488     |
| ENSGALT0000 glycoprotein hormones, alpha polypeptide    | CGA     | 0.372451 | 6       |
| ENSGALT0000 CGG triplet repeat binding protein 1        | CGGBP1  | 0.979001 | 283.5   |
| ENSGALT0000 cingulin                                    | CGN     | 0.979624 | 2056.5  |
| ENSGALT0000 cingulin-like 1                             | CGNL1   | 0.99396  | 368.499 |
| ENSGALT0000 cell growth regulator with ring finger      | CGRRF1  | 0.906908 | 209     |
| ENSGALT0000 cholesterol 25-hydroxylase                  | CH25H   | 0.639362 | 12.5    |
| ENSGALT0000 ChaC, cation transport regulator homolog    | CHAC1   | 0.798669 | 38      |
| ENSGALT0000 ChaC, cation transport regulator homolog    | CHAC2   | 0.971402 | 137     |
| ENSGALT0000 chondroadherin                              | CHAD    | 0.995383 | 13.5    |
| ENSGALT0000 chondroadherin-like                         | CHADL   | 0.937694 | 303     |
| ENSGALT0000 chromatin assembly factor 1, subunit A      | CHAF1A  | 0.939202 | 1031.01 |
| ENSGALT0000 chromatin assembly factor 1, subunit B      | CHAF1B  | 0.927566 | 676.5   |
| ENSGALT0000 chromosome alignment maintaining factor     | CHAMP1  | 0.974281 | 1347.5  |
| ENSGALT0000 choline O-acetyltransferase                 | CHAT    | 0.400114 | 69.5    |
| ENSGALT0000 coiled-coil-helix-coiled-coil-helix domain  | CHCHD10 | 0.713527 | 234     |

|                                                    |         |           |          |
|----------------------------------------------------|---------|-----------|----------|
| ENSGALT0000 coiled-coil-helix-coiled-coil-helix do | CHCHD2  | 0.30637   | 8766.22  |
| ENSGALT0000 coiled-coil-helix-coiled-coil-helix do | CHCHD3  | 0.887726  | 1547     |
| ENSGALT0000 coiled-coil-helix-coiled-coil-helix do | CHCHD4  | 0.0771314 | 530.5    |
| ENSGALT0000 coiled-coil-helix-coiled-coil-helix do | CHCHD5  | 0.713954  | 708.5    |
| ENSGALT0000 coiled-coil-helix-coiled-coil-helix do | CHCHD6  | 0.8309    | 1248     |
| ENSGALT0000 coiled-coil-helix-coiled-coil-helix do | CHCHD8  | 0.356868  | 190      |
| ENSGALT0000 chromodomain helicase DNA binding      | CHD1    | 0.992847  | 1160.23  |
| ENSGALT0000 chromodomain helicase DNA binding      | CHD1L   | 0.931343  | 388      |
| ENSGALT0000 chromodomain helicase DNA binding      | CHD2    | 0.981405  | 2043     |
| ENSGALT0000 chromodomain helicase DNA binding      | CHD4    | 0.930575  | 18634.9  |
| ENSGALT0000 chromodomain helicase DNA binding      | CHD5    | 0.835862  | 2132.5   |
| ENSGALT0000 chromodomain helicase DNA binding      | CHD6    | 0.995005  | 5678.74  |
| ENSGALT0000 chromodomain helicase DNA binding      | CHD7    | 0.946803  | 2985.89  |
| ENSGALT0000 chromodomain helicase DNA binding      | CHD9    | 0.984991  | 2235.5   |
| ENSGALT0000 choline dehydrogenase                  | CHDH    | 0.988398  | 225.5    |
| ENSGALT0000 checkpoint kinase 1                    | CHEK1   | 0.651482  | 522.501  |
| ENSGALT0000 CHK2 checkpoint homolog (S. pom        | CHEK2   | 0.975119  | 343      |
| ENSGALT0000 calcium homeostasis endoplasmic        | CHERP   | 0.937055  | 2785.53  |
| ENSGALT0000 checkpoint with forkhead and ring f    | CHFR    | 0.924256  | 808      |
| ENSGALT0000 chromogranin A (parathyroid secret     | CHGA    | 0.362257  | 4612.66  |
| ENSGALT0000 chromogranin B (secretogranin 1)       | CHGB    | 0.955195  | 338      |
| ENSGALT0000 chitinase, acidic                      | CHIA    | 0.464758  | 2.64E-12 |
| ENSGALT0000 cysteine-rich hydrophobic domain 1     | CHIC1   | 0.939979  | 187      |
| ENSGALT0000 cysteine-rich hydrophobic domain 2     | CHIC2   | 0.968314  | 164      |
| ENSGALT0000 chitinase domain containing 1          | CHID1   | 0.967     | 233.5    |
| ENSGALT0000 choline kinase alpha                   | CHKA    | 0.969845  | 1278     |
| ENSGALT0000 cell adhesion molecule with homolo     | CHL1    | 0.882999  | 637.5    |
| ENSGALT0000 choroideremia-like (Rab escort prot    | CHML    | 0.99072   | 1268.01  |
| ENSGALT0000 chromatin modifying protein 1A         | CHMP1A  | 0.901546  | 1356.01  |
| ENSGALT0000 chromatin modifying protein 1B         | CHMP1B  | 0.834965  | 1013.5   |
| ENSGALT0000 charged multivesicular body protei     | CHMP2A  | 0.616366  | 1031.5   |
| ENSGALT0000 chromatin modifying protein 2B         | CHMP2B  | 0.985339  | 1385     |
| ENSGALT0000 chromatin modifying protein 4B         | CHMP4B  | 0.8541    | 2041     |
| ENSGALT0000 chromatin modifying protein 4C         | CHMP4C  | 0.975289  | 271.5    |
| ENSGALT0000 chromatin modifying protein 5          | CHMP5   | 0.83078   | 1603     |
| ENSGALT0000 chromatin modifying protein 6          | CHMP6   | 0.878487  | 2364     |
| ENSGALT0000 CHMP family, member 7                  | CHMP7   | 0.962744  | 3069.39  |
| ENSGALT0000 chimerin (chimaerin) 1                 | CHN1    | 0.872787  | 1037     |
| ENSGALT0000 chimerin (chimaerin) 2                 | CHN2    | 0.942037  | 237      |
| ENSGALT0000 chondrolectin                          | CHODL   | 0.903643  | 300      |
| ENSGALT0000 cysteine and histidine-rich domain (   | CHORDC1 | 0.951787  | 508.501  |
| ENSGALT0000 calcium binding protein P22            | CHP     | 0.939589  | 2008     |
| ENSGALT0000 chondroitin polymerizing factor        | CHPF    | 0.920591  | 790      |
| ENSGALT0000 chondroitin polymerizing factor 2      | CHPF2   | 0.971245  | 933.723  |
| ENSGALT0000 choline phosphotransferase 1           | CHPT1   | 0.974532  | 683.5    |
| ENSGALT0000 chordin-like 1                         | CHRD1   | 0.757911  | 3374     |
| ENSGALT0000 chordin-like 2                         | CHRD2   | 0.970378  | 21       |
| ENSGALT0000 cholinergic receptor, muscarinic 2     | CHRM2   | 0.73468   | 20       |
| ENSGALT0000 cholinergic receptor, muscarinic 3     | CHRM3   | 0.931316  | 139.5    |
| ENSGALT0000 cholinergic receptor, muscarinic 4     | CHRM4   | 0.832521  | 100      |
| ENSGALT0000 cholinergic receptor, muscarinic 5     | CHRM5   | 0.920025  | 2.5      |
| ENSGALT0000 cholinergic receptor, nicotinic, alph  | CHRNA1  | 0.575798  | 158      |
| ENSGALT0000 cholinergic receptor, nicotinic, alph  | CHRNA10 | 0.204574  | 91.8804  |
| ENSGALT0000 cholinergic receptor, nicotinic, alph  | CHRNA3  | 0.71476   | 8        |
| ENSGALT0000 cholinergic receptor, nicotinic, alph  | CHRNA4  | 0.501077  | 312      |
| ENSGALT0000 cholinergic receptor, nicotinic, alph  | CHRNA5  | 0.989923  | 88       |

|                                                    |         |          |         |
|----------------------------------------------------|---------|----------|---------|
| ENSGALT0000 cholinergic receptor, nicotinic, alpha | CHRNA6  | 0.988878 | 19      |
| ENSGALT0000 cholinergic receptor, nicotinic, alpha | CHRNA7  | 0.96749  | 27.5    |
| ENSGALT0000 cholinergic receptor, nicotinic, alpha | CHRNA9  | 0.337704 | 1       |
| ENSGALT0000 cholinergic receptor, nicotinic, beta  | CHRNB3  | 0.704414 | 78      |
| ENSGALT0000 cholinergic receptor, nicotinic, beta  | CHRNB4  | 0.394608 | 1.5     |
| ENSGALT0000 cholinergic receptor, nicotinic, delta | CHRND   | 0.649519 | 2       |
| ENSGALT0000 cholinergic receptor, nicotinic, gamma | CHRNA5  | 0.353553 | 0       |
| ENSGALT0000 carbohydrate (keratan sulfate Gal-6    | CHST1   | 0.743191 | 174.5   |
| ENSGALT0000 carbohydrate sulfotransferase 10       | CHST10  | 0.968581 | 1028    |
| ENSGALT0000 carbohydrate (chondroitin 4) sulfotr   | CHST11  | 0.874592 | 109     |
| ENSGALT0000 carbohydrate (chondroitin 4) sulfotr   | CHST12  | 0.973151 | 357.5   |
| ENSGALT0000 carbohydrate (N-acetylgalactosami      | CHST15  | 0.723035 | 105.5   |
| ENSGALT0000 carbohydrate (N-acetylglucosamine      | CHST2   | 0.816527 | 1072    |
| ENSGALT0000 carbohydrate (chondroitin 6) sulfotr   | CHST3   | 0.82987  | 1035.5  |
| ENSGALT0000 carbohydrate (N-acetylglucosamine      | CHST4   | 0.590433 | 3.0823  |
| ENSGALT0000 carbohydrate (N-acetylgalactosami      | CHST8   | 0.975932 | 120     |
| ENSGALT0000 carbohydrate (N-acetylgalactosami      | CHST9   | 0.820973 | 250.08  |
| ENSGALT0000 chondroitin sulfate synthase 1         | CHSY1   | 0.989578 | 812     |
| ENSGALT0000 CTF18, chromosome transmission         | CHTF18  | 0.824805 | 2374.97 |
| ENSGALT0000 CTF8, chromosome transmission fi       | CHTF8   | 0.586262 | 603.5   |
| ENSGALT0000 chromatin target of PRMT1              | CHTOP   | 0.8563   | 5229.5  |
| ENSGALT0000 conserved helix-loop-helix ubiquito    | CHUK    | 0.90382  | 1165    |
| ENSGALT0000 CHUNK-1 protein                        | CHUNK-1 | 0.945294 | 13.5    |
| ENSGALT0000 cytosolic iron-sulfur protein assem    | CIAO1   | 0.350926 | 1262    |
| ENSGALT0000 cytokine induced apoptosis inhibito    | CIAPIN1 | 0.80433  | 4593    |
| ENSGALT0000 calcium and integrin binding 1 (calr   | CIB1    | 0.993266 | 2942.01 |
| ENSGALT0000 calcium and integrin binding family    | CIB2    | 0.774667 | 182.5   |
| ENSGALT0000 calcium and integrin binding family    | CIB3    | 0.970319 | 5       |
| ENSGALT0000 cell death-inducing DFFA-like effec    | CIDEA   | 0.914907 | 52      |
| ENSGALT0000 class II, major histocompatibility co  | CIITA   | 0.579967 | 1.5     |
| ENSGALT0000 cartilage intermediate layer protein   | CILP    | 0.824031 | 15      |
| ENSGALT0000 cyclin-dependent kinase 2 interacti    | CINP    | 0.971313 | 338     |
| ENSGALT0000 CBF1 interacting corepressor           | CIR1    | 0.883869 | 328     |
| ENSGALT0000 cold inducible RNA binding protein     | CIRBP   | 0.894521 | 22040.9 |
| ENSGALT0000 cirrhosis, autosomal recessive 1A (    | CIRH1A  | 0.806219 | 775.5   |
| ENSGALT0000 CDGSH iron sulfur domain 1             | CISD1   | 0.874645 | 1321    |
| ENSGALT0000 CDGSH iron sulfur domain 2             | CISD2   | 0.810049 | 1495.5  |
| ENSGALT0000 Cytokine-inducible SH2-containing      | CISH    | 0.466238 | 30.6299 |
| ENSGALT0000 citron (rho-interacting, serine/threo  | CIT     | 0.940089 | 1096    |
| ENSGALT0000 Cbp/p300-interacting transactivator    | CITED2  | 0.729086 | 433     |
| ENSGALT0000 Cbp/p300-interacting transactivator    | CITED4  | 0.421663 | 348     |
| ENSGALT0000 CDKN1A interacting zinc finger pro     | CIZ1    | 0.828675 | 1760.02 |
| ENSGALT0000 cytoskeleton associated protein 2      | CKAP2   | 0.904136 | 1807.5  |
| ENSGALT0000 cytoskeleton associated protein 2-li   | CKAP2L  | 0.937766 | 1073    |
| ENSGALT0000 cytoskeleton-associated protein 4      | CKAP4   | 0.922164 | 4079    |
| ENSGALT0000 cytoskeleton associated protein 5      | CKAP5   | 0.937874 | 6137    |
| ENSGALT0000 creatine kinase, brain                 | CKB     | 0.52008  | 3970.51 |
| ENSGALT0000 creatine kinase, mitochondrial 1A      | CKMT1A  | 0.389131 | 92.5    |
| ENSGALT0000 creatine kinase, mitochondrial 2 (s    | CKMT2   | 0.347342 | 27.5    |
| ENSGALT0000 CDC28 protein kinase regulatory si     | CKS2    | 0.873479 | 101.5   |
| ENSGALT0000 liver ribonuclease A                   | CL2     | 0.649519 | 0       |
| ENSGALT0000 cytoplasmic linker associated prote    | CLASP1  | 0.893553 | 3541.35 |
| ENSGALT0000 cytoplasmic linker associated prote    | CLASP2  | 0.948051 | 2537.5  |
| ENSGALT0000 chloride channel, calcium activated    | CLCA2   | 0.78893  | 3300    |
| ENSGALT0000 chloride channel CLIC-like 1           | CLCC1   | 0.968686 | 753.47  |
| ENSGALT0000 chloride channel 1, skeletal muscle    | CLCN1   | 0.995294 | 69.5    |

|                                                           |         |           |         |
|-----------------------------------------------------------|---------|-----------|---------|
| ENSGALT0000 chloride channel 3                            | CLCN3   | 0.949655  | 1916    |
| ENSGALT0000 chloride channel 4                            | CLCN4   | 0.867913  | 377.5   |
| ENSGALT0000 chloride channel 5                            | CLCN5   | 0.977286  | 711.5   |
| ENSGALT0000 chloride channel 6                            | CLCN6   | 0.88467   | 600.5   |
| ENSGALT0000 chloride channel 7                            | CLCN7   | 0.985148  | 2586.5  |
| ENSGALT0000 chloride channel, voltage-sensitive           | CLCNKB  | 0.937349  | 17      |
| ENSGALT0000 claudin 1                                     | CLDN1   | 0.945593  | 35256.5 |
| ENSGALT0000 claudin 10                                    | CLDN10  | 0.882675  | 18      |
| ENSGALT0000 claudin 11                                    | CLDN11  | 0.714021  | 262     |
| ENSGALT0000 claudin 12                                    | CLDN12  | 0.974043  | 323     |
| ENSGALT0000 claudin 14                                    | CLDN14  | 0.464758  | 1       |
| ENSGALT0000 claudin 15                                    | CLDN15  | 0.797634  | 2.5     |
| ENSGALT0000 claudin 16                                    | CLDN16  | 0.72999   | 71.5    |
| ENSGALT0000 claudin 18                                    | CLDN18  | ?         | 0       |
| ENSGALT0000 claudin 19                                    | CLDN19  | 0.829867  | 106.5   |
| ENSGALT0000 claudin 2                                     | CLDN2   | ?         | 0       |
| ENSGALT0000 claudin 20                                    | CLDN20  | 0.806981  | 9       |
| ENSGALT0000 claudin 22                                    | CLDN22  | 0.821187  | 1.5     |
| ENSGALT0000 claudin 23                                    | CLDN23  | 0.818503  | 20.5    |
| ENSGALT0000 \N                                            | CLDN3   | 0.609666  | 15049.3 |
| ENSGALT0000 claudin 5                                     | CLDN5   | 0.876339  | 246.338 |
| ENSGALT0000 claudin 8                                     | CLDN8   | 0.711283  | 835.5   |
| ENSGALT0000 claudin domain containing 1                   | CLDND1  | 0.906921  | 2761.5  |
| ENSGALT0000 C-type lectin domain family 16, member 1      | CLEC16A | 0.979178  | 535.001 |
| ENSGALT0000 C-type lectin domain family 17, member 1      | CLEC17A | 0.718404  | 4.5     |
| ENSGALT0000 C-type lectin domain family 3, member 3A      | CLEC3A  | 0.464758  | 0.5     |
| ENSGALT0000 C-type lectin domain family 3, member 3B      | CLEC3B  | 0.917074  | 32      |
| ENSGALT0000 calmegin                                      | CLGN    | 0.987649  | 642.5   |
| ENSGALT0000 chloride intracellular channel 2              | CLIC2   | 0.811837  | 162.5   |
| ENSGALT0000 chloride intracellular channel 3              | CLIC3   | 0.847723  | 53      |
| ENSGALT0000 chloride intracellular channel 4              | CLIC4   | 0.916296  | 1814    |
| ENSGALT0000 chloride intracellular channel 5              | CLIC5   | 0.716497  | 0.5     |
| ENSGALT0000 chloride intracellular channel 6              | CLIC6   | 0.788162  | 639     |
| ENSGALT0000 clathrin interactor 1                         | CLINT1  | 0.984214  | 2729.5  |
| ENSGALT0000 CAP-GLY domain containing linker 1            | CLIP1   | 0.918355  | 1855.99 |
| ENSGALT0000 CAP-GLY domain containing linker 2            | CLIP2   | 0.826592  | 2073.5  |
| ENSGALT0000 CAP-GLY domain containing linker 4            | CLIP4   | 0.997591  | 210     |
| ENSGALT0000 CDC-like kinase 1                             | CLK1    | 0.99702   | 738     |
| ENSGALT0000 CDC-like kinase 2                             | CLK2    | 0.908317  | 1269.49 |
| ENSGALT0000 CDC-like kinase 3                             | CLK3    | 0.933265  | 811.499 |
| ENSGALT0000 CDC-like kinase 4                             | CLK4    | 0.963063  | 1152.5  |
| ENSGALT0000 calmin (calponin-like, transmembrane protein) | CLMN    | 0.865906  | 143     |
| ENSGALT0000 CXADR-like membrane protein                   | CLMP    | 0.884681  | 563     |
| ENSGALT0000 ceroid-lipofuscinosis, neuronal 5             | CLN5    | 0.917063  | 117.5   |
| ENSGALT0000 ceroid-lipofuscinosis, neuronal 6, large      | CLN6    | 0.883081  | 1905.01 |
| ENSGALT0000 CLN8 protein                                  | CLN8    | 0.928894  | 708     |
| ENSGALT0000 chloride channel, nucleotide-sensitive        | CLNS1A  | 0.741325  | 2091    |
| ENSGALT0000 clock homolog (mouse)                         | CLOCK   | 0.998266  | 273     |
| ENSGALT0000 CLP1, cleavage and polyadenylation factor 1   | CLP1    | 0.707259  | 1391.5  |
| ENSGALT0000 colipase, pancreatic                          | CLPS    | 0.0441942 | 0       |
| ENSGALT0000 CLPTM1-like                                   | CLPTM1L | 0.976307  | 2436    |
| ENSGALT0000 ClpX caseinolytic peptidase X homolog         | CLPX    | 0.9609    | 2604.52 |
| ENSGALT0000 clarin 1                                      | CLRN1   | 0.956882  | 313     |
| ENSGALT0000 clarin 3                                      | CLRN3   | 0.464758  | 0       |
| ENSGALT0000 claspin                                       | CLSPN   | 0.915539  | 320.5   |
| ENSGALT0000 calsyntenin 1                                 | CLSTN1  | 0.968482  | 11947.9 |



|                                                                      |             |          |         |
|----------------------------------------------------------------------|-------------|----------|---------|
| ENSGALT0000 calsyntenin 2                                            | CLSTN2      | 0.897475 | 1091    |
| ENSGALT0000 calsyntenin 3                                            | CLSTN3      | 0.937033 | 4341    |
| ENSGALT0000 clathrin, light chain A                                  | CLTA        | 0.363434 | 3448    |
| ENSGALT0000 clathrin, light chain B                                  | CLTB        | 0.725132 | 2455.52 |
| ENSGALT0000 clathrin, heavy chain (Hc)                               | CLTC        | 0.951379 | 14045.2 |
| ENSGALT0000 clathrin, heavy chain-like 1                             | CLTCL1      | 0.955946 | 6494    |
| ENSGALT0000 clusterin                                                | CLU         | 0.902254 | 2114.53 |
| ENSGALT0000 clusterin associated protein 1                           | CLUAP1      | 0.926638 | 886.5   |
| ENSGALT0000 clusterin-like 1 (retinal)                               | CLUL1       | 0.699372 | 3.5     |
| ENSGALT0000 clavesin 1                                               | CLVS1       | 0.371458 | 11.5    |
| ENSGALT0000 clavesin 2                                               | CLVS2       | 0.741267 | 126.5   |
| ENSGALT0000 citrate lyase beta like                                  | CLYBL       | 0.945559 | 109.5   |
| ENSGALT0000 cytidine monophosphate N-acetyltransferase 1             | CMAS        | 0.869924 | 272     |
| ENSGALT0000 carboxymethylenebutenolidase homolog 1                   | CMBL        | 0.189571 | 3       |
| ENSGALT0000 COX assembly mitochondrial protein 1                     | CMC1        | 0.90559  | 151.5   |
| ENSGALT0000 COX assembly mitochondrial protein 2                     | CMC2        | 0.989314 | 311.5   |
| ENSGALT0000 c-Maf inducing protein                                   | CMIP        | 0.789741 | 1696.5  |
| ENSGALT0000 cytidine monophosphate (UMP-CMP) kinase 1                | CMPK1       | 0.913299 | 2124.5  |
| ENSGALT0000 cytidine monophosphate (UMP-CMP) kinase 2                | CMPK2       | 0.9642   | 27.5    |
| ENSGALT0000 CKLF-like MARVEL transmembrane protein 3                 | CMTM3       | 0.861517 | 877.498 |
| ENSGALT0000 CKLF-like MARVEL transmembrane protein 4                 | CMTM4       | 0.9591   | 109     |
| ENSGALT0000 CKLF-like MARVEL transmembrane protein 6                 | CMTM6       | 0.972425 | 354.5   |
| ENSGALT0000 chemokine-like factor superfamily 7                      | CMTM7       | 0.820381 | 171.5   |
| ENSGALT0000 CKLF-like MARVEL transmembrane protein 8                 | CMTM8       | 0.501553 | 235.5   |
| ENSGALT0000 cardiomyopathy associated 5                              | CMYA5       | 0.740073 | 1       |
| ENSGALT0000 UPF0694 transmembrane protein (Chick)                    | CN109_CHICK | 0.97962  | 132     |
| ENSGALT0000 CCHC-type zinc finger, nucleic acid binding domain 1     | CNBP        | 0.805512 | 11965.2 |
| ENSGALT0000 carnosine dipeptidase 1 (metalloproteinase)              | CNDP1       | 0.884168 | 49.5    |
| ENSGALT0000 CNDP dipeptidase 2 (metalloproteinase)                   | CNDP2       | 0.895847 | 5242.85 |
| ENSGALT0000 cyclic nucleotide gated channel alpha 1                  | CNGA1       | 1        | 0.5     |
| ENSGALT0000 cyclic nucleotide gated channel alpha 2                  | CNGA2       | 0.807809 | 125.5   |
| ENSGALT0000 cyclic nucleotide gated channel alpha 3                  | CNGA3       | 0.839648 | 122.5   |
| ENSGALT0000 cyclic nucleotide gated channel alpha 4                  | CNGA4       | 0.949895 | 122.5   |
| ENSGALT0000 cyclic nucleotide gated channel beta 1                   | CNGB1       | 0.819058 | 37.5    |
| ENSGALT0000 cyclic nucleotide gated channel beta 3                   | CNGB3       | ?        | 0       |
| ENSGALT0000 cornichon homolog (Drosophila)                           | CNIH        | 0.834622 | 2434.5  |
| ENSGALT0000 cornichon homolog 3 (Drosophila)                         | CNIH3       | 0.80321  | 1.5     |
| ENSGALT0000 cornichon homolog 4 (Drosophila)                         | CNIH4       | 0.793963 | 513     |
| ENSGALT0000 connector enhancer of kinase suppressor of phosphatase 2 | CNKSR2      | 0.878758 | 377     |
| ENSGALT0000 calponin 3, acidic                                       | CNN3        | 0.830746 | 6689.37 |
| ENSGALT0000 cyclin M1                                                | CNNM1       | 0.882723 | 86.5    |
| ENSGALT0000 cyclin M2                                                | CNNM2       | 0.965739 | 1142.73 |
| ENSGALT0000 cappuccino homolog (mouse)                               | CNO         | 0.750144 | 712     |
| ENSGALT0000 CCR4-NOT transcription complex, subunit 1                | CNOT1       | 0.975686 | 12900.3 |
| ENSGALT0000 CCR4-NOT transcription complex, subunit 10               | CNOT10      | 0.956481 | 1321.47 |
| ENSGALT0000 CCR4-NOT transcription complex, subunit 2                | CNOT2       | 0.994076 | 1809    |
| ENSGALT0000 CCR4-NOT transcription complex, subunit 4                | CNOT4       | 0.957802 | 888.505 |
| ENSGALT0000 CCR4-NOT transcription complex, subunit 6                | CNOT6       | 0.984184 | 2226.5  |
| ENSGALT0000 CCR4-NOT transcription complex, subunit 6L               | CNOT6L      | 0.973008 | 402.501 |
| ENSGALT0000 CCR4-NOT transcription complex, subunit 7                | CNOT7       | 0.97739  | 2848    |
| ENSGALT0000 CCR4-NOT transcription complex, subunit 8                | CNOT8       | 0.941717 | 1927    |
| ENSGALT0000 cyclin Pas1/PHO80 domain containing protein 1            | CNPPD1      | 0.900949 | 970.9   |
| ENSGALT0000 cannabinoid receptor 1 (brain)                           | CNR1        | 0.726028 | 698.505 |
| ENSGALT0000 cannabinoid receptor 2 (macrophage)                      | CNR2        | 0.943934 | 1       |
| ENSGALT0000 cannabinoid receptor interacting protein 1               | CNRIP1      | 0.378748 | 114     |
| ENSGALT0000 consortin, connexin sorting protein                      | CNST        | 0.94206  | 205     |

|                                                 |          |          |         |
|-------------------------------------------------|----------|----------|---------|
| ENSGALT0000 ciliary neurotrophic factor         | CNTF     | 0.842464 | 21.5    |
| ENSGALT0000 centlein, centrosomal protein       | CNTLN    | 0.931865 | 67.5    |
| ENSGALT0000 contactin 1                         | CNTN1    | 0.841049 | 943.004 |
| ENSGALT0000 contactin 2 (axonal)                | CNTN2    | 0.663885 | 8896.23 |
| ENSGALT0000 contactin 3 (plasmacytoma associa   | CNTN3    | 0.981285 | 317     |
| ENSGALT0000 contactin 4                         | CNTN4    | 0.993531 | 4427.49 |
| ENSGALT0000 contactin 5                         | CNTN5    | 0.709619 | 405.498 |
| ENSGALT0000 contactin 6                         | CNTN6    | 0.91547  | 24.5    |
| ENSGALT0000 contactin associated protein 1      | CNTNAP1  | 0.866368 | 231     |
| ENSGALT0000 contactin associated protein-like 2 | CNTNAP2  | 0.873506 | 20      |
| ENSGALT0000 contactin associated protein-like 5 | CNTNAP5  | 0.843682 | 398.5   |
| ENSGALT0000 cytochrome C oxidase assembly fa    | COA5     | 0.909719 | 311     |
| ENSGALT0000 cordon-bleu homolog (mouse)         | COBL     | 0.969612 | 1428.5  |
| ENSGALT0000 COBL-like 1                         | COBLL1   | 0.99559  | 422     |
| ENSGALT0000 cofactor of BRCA1                   | COBRA1   | 0.937358 | 2246.58 |
| ENSGALT0000 coagulation factor C homolog, coch  | COCH     | 0.840257 | 257.5   |
| ENSGALT0000 component of oligomeric golgi com   | COG1     | 0.949594 | 2336.07 |
| ENSGALT0000 component of oligomeric golgi com   | COG2     | 0.962476 | 747.5   |
| ENSGALT0000 component of oligomeric golgi com   | COG3     | 0.973658 | 616     |
| ENSGALT0000 component of oligomeric golgi com   | COG4     | 0.925348 | 3042.5  |
| ENSGALT0000 component of oligomeric golgi com   | COG5     | 0.936273 | 748.5   |
| ENSGALT0000 component of oligomeric golgi com   | COG6     | 0.968768 | 1029.5  |
| ENSGALT0000 component of oligomeric golgi com   | COG7     | 0.96183  | 2764.13 |
| ENSGALT0000 component of oligomeric golgi com   | COG8     | 0.887653 | 1437.5  |
| ENSGALT0000 coilin                              | COIL     | 0.933693 | 1067    |
| ENSGALT0000 collagen, type X, alpha 1           | COL10A1  | 0.657817 | 2       |
| ENSGALT0000 collagen, type XI, alpha 1          | COL11A1  | 0.911494 | 10341.8 |
| ENSGALT0000 collagen, type XII, alpha 1         | COL12A1  | 0.746984 | 1442.99 |
| ENSGALT0000 collagen, type XIII, alpha 1        | COL13A1  | 0.950465 | 116     |
| ENSGALT0000 collagen, type XIV, alpha 1         | COL14A1  | 0.664272 | 978.004 |
| ENSGALT0000 collagen, type XV, alpha 1          | COL15A1  | 0.603518 | 237.5   |
| ENSGALT0000 collagen, type XVII, alpha 1        | COL17A1  | 0.955491 | 199     |
| ENSGALT0000 collagen, type XVIII, alpha 1       | COL18A1  | 0.991064 | 42356.9 |
| ENSGALT0000 collagen, type XIX, alpha 1         | COL19A1  | 0.79295  | 196.5   |
| ENSGALT0000 collagen, type I, alpha 1           | COL1A1   | 0.948871 | 1120.57 |
| ENSGALT0000 collagen, type I, alpha 2           | COL1A2   | 0.940032 | 13606.5 |
| ENSGALT0000 collagen, type XX, alpha 1          | COL20A1  | 0.56163  | 10      |
| ENSGALT0000 collagen, type XXI, alpha 1         | COL21A1  | 0.987916 | 92      |
| ENSGALT0000 collagen, type XXII, alpha 1        | COL22A1  | 0.855938 | 46.5    |
| ENSGALT0000 collagen, type XXIII, alpha 1       | COL23A1  | 0.955725 | 140     |
| ENSGALT0000 collagen, type XXIV, alpha 1        | COL24A1  | 0.870783 | 1999.5  |
| ENSGALT0000 collagen, type XXV, alpha 1         | COL25A1  | 0.954112 | 114.5   |
| ENSGALT0000 collagen, type XXVII, alpha 1       | COL27A1  | 0.997433 | 1887    |
| ENSGALT0000 collagen, type XXVIII, alpha 1      | COL28A1  | 0.71377  | 5       |
| ENSGALT0000 alpha 1 type IIA collagen precursor | COL2A1   | 0.990953 | 49389.6 |
| ENSGALT0000 collagen, type III, alpha 1         | COL3A1   | 0.961482 | 536.536 |
| ENSGALT0000 collagen, type IV, alpha 1          | COL4A1   | 0.876031 | 6143.03 |
| ENSGALT0000 collagen, type IV, alpha 2          | COL4A2   | 0.894714 | 5326.5  |
| ENSGALT0000 collagen, type IV, alpha 3 (Goodpa  | COL4A3   | 0.879219 | 38      |
| ENSGALT0000 collagen, type IV, alpha 3 (Goodpa  | COL4A3BP | 0.983765 | 449.5   |
| ENSGALT0000 collagen, type IV, alpha 4          | COL4A4   | 0.954588 | 56.5    |
| ENSGALT0000 collagen, type IV, alpha 5          | COL4A5   | 0.981202 | 8908.31 |
| ENSGALT0000 collagen, type IV, alpha 6          | COL4A6   | 0.965957 | 17161.5 |
| ENSGALT0000 collagen, type V, alpha 1           | COL5A1   | 0.98336  | 9177.32 |
| ENSGALT0000 collagen, type V, alpha 2           | COL5A2   | 0.824733 | 9957.3  |
| ENSGALT0000 collagen, type VI, alpha 1          | COL6A1   | 0.977271 | 627.502 |

|                                                    |         |          |          |
|----------------------------------------------------|---------|----------|----------|
| ENSGALT0000 collagen, type VI, alpha 2             | COL6A2  | 0.958867 | 191.5    |
| ENSGALT0000 collagen, type VI, alpha 3             | COL6A3  | 0.921496 | 219.5    |
| ENSGALT0000 collagen, type VI, alpha 6             | COL6A6  | 0.847012 | 48       |
| ENSGALT0000 collagen, type VII, alpha 1            | COL7A1  | 0.950361 | 823.5    |
| ENSGALT0000 collagen, type VIII, alpha 1           | COL8A1  | 0.983346 | 141.5    |
| ENSGALT0000 collagen, type VIII, alpha 2           | COL8A2  | 0.986399 | 1835.5   |
| ENSGALT0000 collagen, type IX, alpha 1             | COL9A1  | 0.958738 | 10179.8  |
| ENSGALT0000 collagen, type IX, alpha 3             | COL9A3  | 0.85406  | 2825     |
| ENSGALT0000 collectin sub-family member 10 (C-     | COLEC10 | 0.713325 | 4        |
| ENSGALT0000 collectin sub-family member 11         | COLEC11 | 0.888662 | 4        |
| ENSGALT0000 collectin sub-family member 12         | COLEC12 | 0.99656  | 2224.05  |
| ENSGALT0000 collagen-like tail subunit (single str | COLQ    | 0.429811 | 1        |
| ENSGALT0000 copper metabolism (Murr1) domain       | COMMD1  | 0.765397 | 1165.5   |
| ENSGALT0000 COMM domain containing 10              | COMMD10 | 0.784365 | 488      |
| ENSGALT0000 COMM domain containing 2               | COMMD2  | 0.913927 | 1164.5   |
| ENSGALT0000 COMM domain containing 3               | COMMD3  | 0.2797   | 953.5    |
| ENSGALT0000 COMM domain containing 4               | COMMD4  | 0.37788  | 2575     |
| ENSGALT0000 COMM domain containing 5               | COMMD5  | 0.848966 | 2042.5   |
| ENSGALT0000 COMM domain containing 6               | COMMD6  | 0.961447 | 606      |
| ENSGALT0000 COMM domain containing 7               | COMMD7  | 0.70968  | 1012     |
| ENSGALT0000 COMM domain containing 8               | COMMD8  | 0.857367 | 670      |
| ENSGALT0000 COMM domain containing 9               | COMMD9  | 0.715289 | 465.335  |
| ENSGALT0000 cartilage oligomeric matrix protein    | COMP    | 0.985557 | 67.5     |
| ENSGALT0000 catechol-O-methyltransferase           | COMT    | 0.904191 | 2460.5   |
| ENSGALT0000 catechol-O-methyltransferase dom       | COMTD1  | 0.805795 | 59.5     |
| ENSGALT0000 coatomer protein complex, subunit      | COPA    | 0.94978  | 11949.4  |
| ENSGALT0000 coatomer protein complex, subunit      | COPB1   | 0.956943 | 5092     |
| ENSGALT0000 coatomer protein complex, subunit      | COPB2   | 0.946483 | 5238.5   |
| ENSGALT0000 coatomer protein complex, subunit      | COPE    | 0.803458 | 5558     |
| ENSGALT0000 coatomer protein complex, subunit      | COPG    | 0.908141 | 9040     |
| ENSGALT0000 coatomer protein complex, subunit      | COPG2   | 0.898401 | 4011.5   |
| ENSGALT0000 opsin 5-like 2                         | COPN5L2 | 0.636572 | 1        |
| ENSGALT0000 COP9 constitutive photomorphoger       | COPS2   | 0.951283 | 1113.85  |
| ENSGALT0000 COP9 constitutive photomorphoger       | COPS3   | 0.954455 | 1415     |
| ENSGALT0000 COP9 constitutive photomorphoger       | COPS4   | 0.902237 | 2411.5   |
| ENSGALT0000 COP9 constitutive photomorphoger       | COPS5   | 0.428198 | 1934     |
| ENSGALT0000 COP9 constitutive photomorphoger       | COPS7A  | 0.861032 | 2624     |
| ENSGALT0000 COP9 constitutive photomorphoger       | COPS7B  | 0.919157 | 714.5    |
| ENSGALT0000 COP9 constitutive photomorphoger       | COPS8   | 0.828681 | 874.5    |
| ENSGALT0000 coenzyme Q10 homolog A (S. cere        | COQ10A  | 0.905544 | 257.5    |
| ENSGALT0000 coenzyme Q10 homolog B (S. cere        | COQ10B  | 0.91306  | 97.5358  |
| ENSGALT0000 coenzyme Q2 homolog, prenyltran        | COQ2    | 0.846202 | 220      |
| ENSGALT0000 coenzyme Q3 homolog, methyltran        | COQ3    | 0.843096 | 470.5    |
| ENSGALT0000 coenzyme Q4 homolog (S. cerevisi       | COQ4    | 0.74574  | 1434     |
| ENSGALT0000 coenzyme Q5 homolog, methyltran        | COQ5    | 0.925803 | 672.5    |
| ENSGALT0000 coenzyme Q6 homolog, monooxyg          | COQ6    | 0.824579 | 952      |
| ENSGALT0000 coenzyme Q7 homolog, ubiquinone        | COQ7    | 0.815029 | 539.5    |
| ENSGALT0000 coenzyme Q9 homolog (S. cerevisi       | COQ9    | 0.701462 | 1491     |
| ENSGALT0000 olfactory receptor 3                   | COR1    | ?        | 0        |
| ENSGALT0000 olfactory receptor 3                   | cor3    | ?        | 0        |
| ENSGALT0000 olfactory receptor 4                   | COR4    | 0.464758 | 0.97863  |
| ENSGALT0000 olfactory receptor 4                   | cor4    | ?        | 0        |
| ENSGALT0000 chick olfactory receptor 6             | cor6    | 0.685935 | 0.5      |
| ENSGALT0000 chick olfactory receptor 7a            | cor7a   | 0.464758 | 2.74E-16 |
| ENSGALT0000 chick olfactory receptor 8             | cor8    | 0.89091  | 13.5     |
| ENSGALT0000 coronin, actin binding protein, 1C     | CORO1C  | 0.550513 | 3038.52  |

|                                                                   |         |           |         |
|-------------------------------------------------------------------|---------|-----------|---------|
| ENSGALT0000 coronin, actin binding protein, 2A                    | CORO2A  | 0.833931  | 356     |
| ENSGALT0000 coronin, actin binding protein, 2B                    | CORO2B  | 0.603412  | 1610    |
| ENSGALT0000 coronin 7                                             | CORO7   | 0.681486  | 1636.6  |
| ENSGALT0000 coactosin-like 1 (Dictyostelium)                      | COTL1   | 0.374731  | 4562.5  |
| ENSGALT0000 cytochrome c oxidase subunit I                        | COX1    | 0.847904  | 351646  |
| ENSGALT0000 COX10 homolog, cytochrome c oxidase subunit 10        | COX10   | 0.905519  | 862.5   |
| ENSGALT0000 COX11 cytochrome c oxidase subunit 11                 | COX11   | 0.769787  | 498     |
| ENSGALT0000 COX15 homolog, cytochrome c oxidase subunit 15        | COX15   | 0.81024   | 928.5   |
| ENSGALT0000 COX17 cytochrome c oxidase subunit 17                 | COX17   | 0.711579  | 309     |
| ENSGALT0000 COX18 cytochrome c oxidase subunit 18                 | COX18   | 0.500768  | 224.5   |
| ENSGALT0000 COX19 cytochrome c oxidase subunit 19                 | COX19   | 0.705565  | 201.5   |
| ENSGALT0000 Cytochrome c oxidase subunit 2                        | COX2    | 0.921938  | 105258  |
| ENSGALT0000 Cytochrome c oxidase subunit 3                        | COX3    | 0.742908  | 205720  |
| ENSGALT0000 cytochrome c oxidase subunit IV isoform 1             | COX4I1  | 0.702192  | 8053.47 |
| ENSGALT0000 COX4 neighbor                                         | COX4NB  | 0.936841  | 865     |
| ENSGALT0000 cytochrome c oxidase subunit Va                       | COX5A   | 0.768016  | 1646.5  |
| ENSGALT0000 cytochrome c oxidase subunit VIa isoform 1            | COX6A1  | 0.0581459 | 5519    |
| ENSGALT0000 cytochrome c oxidase subunit VIc                      | COX6C   | 0.539326  | 2309.5  |
| ENSGALT0000 cytochrome c oxidase subunit VIIa                     | COX7A2  | 0.709132  | 1661    |
| ENSGALT0000 cytochrome c oxidase subunit VIIa isoform 2           | COX7A2L | 0.450166  | 683.5   |
| ENSGALT0000 cytochrome c oxidase subunit VIIc                     | COX7C   | 0.684987  | 1676    |
| ENSGALT0000 ceruloplasmin (ferroxidase)                           | CP      | 0.994565  | 481     |
| ENSGALT0000 carboxypeptidase A1 (pancreatic)                      | CPA1    | 0.207639  | 0       |
| ENSGALT0000 carboxypeptidase A6                                   | CPA6    | 0.52902   | 3       |
| ENSGALT0000 C3 and PZP-like, alpha-2-macroglobulin-associated     | CPAMD8  | 0.890673  | 2289    |
| ENSGALT0000 carboxypeptidase B1 (tissue)                          | CPB1    | 0.272808  | 7       |
| ENSGALT0000 carboxypeptidase B2 (plasma)                          | CPB2    | 1         | 0.5     |
| ENSGALT0000 carboxypeptidase D                                    | CPD     | 0.970395  | 4994    |
| ENSGALT0000 carboxypeptidase E                                    | CPE     | 0.864683  | 1507    |
| ENSGALT0000 cytoplasmic polyadenylation element-binding protein 1 | CPEB1   | 0.983076  | 118.5   |
| ENSGALT0000 cytoplasmic polyadenylation element-binding protein 2 | CPEB2   | 0.99831   | 962.5   |
| ENSGALT0000 cytoplasmic polyadenylation element-binding protein 3 | CPEB3   | 0.934246  | 208     |
| ENSGALT0000 cytoplasmic polyadenylation element-binding protein 4 | CPEB4   | 0.845252  | 315     |
| ENSGALT0000 complexin 2                                           | CPLX2   | 0.739641  | 11.5    |
| ENSGALT0000 complexin 4                                           | CPLX4   | ?         | 0       |
| ENSGALT0000 carboxypeptidase M                                    | CPM     | 0.891596  | 879     |
| ENSGALT0000 carboxypeptidase N, polypeptide 1                     | CPN1    | 0.847042  | 785.5   |
| ENSGALT0000 copine I                                              | CPNE1   | 0.971555  | 1583.5  |
| ENSGALT0000 copine II                                             | CPNE2   | 0.986339  | 508.498 |
| ENSGALT0000 copine III                                            | CPNE3   | 0.958937  | 322     |
| ENSGALT0000 copine IV                                             | CPNE4   | 0.72564   | 378.002 |
| ENSGALT0000 copine VII                                            | CPNE7   | 0.696741  | 15.5    |
| ENSGALT0000 copine VIII                                           | CPNE8   | 0.731909  | 14.5    |
| ENSGALT0000 carboxypeptidase O                                    | CPO     | 0.562993  | 0       |
| ENSGALT0000 coproporphyrinogen oxidase                            | CPOX    | 0.787597  | 1166.5  |
| ENSGALT0000 calcineurin-like phosphoesterase domain 1             | CPPED1  | 0.997672  | 866.5   |
| ENSGALT0000 carbamoyl-phosphate synthase 1, cytosolic             | CPS1    | 0.968954  | 65.5    |
| ENSGALT0000 cleavage and polyadenylation specificity factor 2     | CPSF2   | 0.95816   | 1423    |
| ENSGALT0000 cleavage and polyadenylation specificity factor 3     | CPSF3   | 0.865936  | 1948    |
| ENSGALT0000 cleavage and polyadenylation specificity factor 3L    | CPSF3L  | 0.928907  | 1743.5  |
| ENSGALT0000 cleavage and polyadenylation specificity factor 4     | CPSF4   | 0.923508  | 981     |
| ENSGALT0000 cleavage and polyadenylation specificity factor 4L    | CPSF4L  | 0.938439  | 15.5    |
| ENSGALT0000 cleavage and polyadenylation specificity factor 6     | CPSF6   | 0.959222  | 3468.5  |
| ENSGALT0000 cleavage and polyadenylation specificity factor 7     | CPSF7   | 0.894091  | 895.5   |
| ENSGALT0000 carnitine palmitoyltransferase 1A (liver)             | CPT1A   | 0.95772   | 1044.01 |
| ENSGALT0000 carnitine palmitoyltransferase 2                      | CPT2    | 0.946628  | 1050    |

|             |                                        |          |          |         |
|-------------|----------------------------------------|----------|----------|---------|
| ENSGALT0000 | carboxypeptidase X (M14 family), r     | CPXM2    | 0.797536 | 31.5    |
| ENSGALT0000 | carboxypeptidase Z                     | CPZ      | 0.5211   | 158.5   |
| ENSGALT0000 | complement component (3b/4b) re        | CR1L     | 0.972781 | 1373.5  |
| ENSGALT0000 | complement component (3d/Epstei        | CR2      | 0.729    | 1       |
| ENSGALT0000 | cellular retinoic acid binding protein | CRABP1   | 0.306567 | 279.501 |
| ENSGALT0000 | CASP2 and RIPK1 domain contain         | CRADD    | 0.995832 | 699.5   |
| ENSGALT0000 | Crm, cramped-like (Drosophila)         | CRAMP1L  | 0.991373 | 958.5   |
| ENSGALT0000 | carnitine O-acetyltransferase          | CRAT     | 0.966445 | 431.5   |
| ENSGALT0000 | crumbs homolog 1 (Drosophila)          | CRB1     | 0.521246 | 13      |
| ENSGALT0000 | crumbs homolog 2 (Drosophila)          | CRB2     | 0.996881 | 207     |
| ENSGALT0000 | cereblon                               | CRBN     | 0.970325 | 504     |
| ENSGALT0000 | CGRP receptor component                | CRCP     | 0.829297 | 1090.5  |
| ENSGALT0000 | photoreceptor outer segment meml       | CRDS2    | 0.943384 | 12.5    |
| ENSGALT0000 | cAMP responsive element binding        | CREB1    | 0.96086  | 902.5   |
| ENSGALT0000 | cAMP responsive element binding        | CREB3    | 0.926542 | 1722.5  |
| ENSGALT0000 | cAMP responsive element binding        | CREB3L1  | 0.995902 | 263     |
| ENSGALT0000 | cAMP responsive element binding        | CREB3L3  | 0.916142 | 30.5    |
| ENSGALT0000 | cAMP responsive element binding        | CREB5    | 0.723638 | 79      |
| ENSGALT0000 | CREB binding protein                   | CREBBP   | 0.982574 | 7151.58 |
| ENSGALT0000 | cAMP responsive element binding        | CREBL2   | 0.858572 | 762.5   |
| ENSGALT0000 | cellular repressor of E1A-stimulate    | CREG1    | 0.787291 | 775.495 |
| ENSGALT0000 | cellular repressor of E1A-stimulate    | CREG2    | 0.878934 | 278     |
| ENSGALT0000 | cysteine-rich with EGF-like domain:    | CRELD2   | 0.920014 | 1170    |
| ENSGALT0000 | cAMP responsive element modulat        | CREM     | 0.922547 | 81.5    |
| ENSGALT0000 | Corticotropin releasing hormoneUn      | CRH      | 0.649519 | 0.5     |
| ENSGALT0000 | corticotropin releasing hormone bir    | CRHBP    | 0.351647 | 16.5    |
| ENSGALT0000 | corticotropin releasing hormone rec    | CRHR1    | 0.691869 | 39      |
| ENSGALT0000 | corticotropin releasing hormone rec    | CRHR2    | 0.774397 | 32.5    |
| ENSGALT0000 | cysteine rich transmembrane BMP        | CRIM1    | 0.915477 | 762.5   |
| ENSGALT0000 | cysteine-rich protein 2                | CRIP2    | 0.469821 | 786     |
| ENSGALT0000 | cysteine-rich PDZ-binding protein      | CRIPT    | 0.912876 | 1806    |
| ENSGALT0000 | cysteine-rich secretory protein LCC    | CRISPLD1 | 0.985153 | 508.5   |
| ENSGALT0000 | cysteine-rich secretory protein LCC    | CRISPLD2 | 0.998945 | 198.5   |
| ENSGALT0000 | v-crkl sarcoma virus CT10 oncogen      | CRK      | 0.947973 | 1657.5  |
| ENSGALT0000 | v-crkl sarcoma virus CT10 oncogen      | CRKL     | 0.950895 | 1133.5  |
| ENSGALT0000 | cytokine receptor-like factor 2        | CRLF2    | ?        | 0       |
| ENSGALT0000 | cytokine receptor-like factor 3        | CRLF3    | 0.963204 | 2473    |
| ENSGALT0000 | cardiolipin synthase 1                 | CRLS1    | 0.96501  | 730.5   |
| ENSGALT0000 | collapsin response mediator proteir    | CRMP1    | 0.65333  | 4185.47 |
| ENSGALT0000 | crooked neck pre-mRNA splicing fa      | CRNKL1   | 0.98283  | 1516.5  |
| ENSGALT0000 | carnitine O-octanoyltransferase        | CROT     | 0.984805 | 3018    |
| ENSGALT0000 | cartilage acidic protein 1             | CRTAC1   | 0.675142 | 702     |
| ENSGALT0000 | cytotoxic and regulatory T cell mole   | CRTAM    | 0.828826 | 1       |
| ENSGALT0000 | cartilage associated protein           | CRTAP    | 0.935207 | 1216.49 |
| ENSGALT0000 | CREB regulated transcription coacti    | CRTC1    | 0.922695 | 1053.5  |
| ENSGALT0000 | cryptochrome 1 (photolyase-like)       | CRY1     | 0.978202 | 1751.98 |
| ENSGALT0000 | cryptochrome 2 (photolyase-like)       | CRY2     | 0.985279 | 2195.47 |
| ENSGALT0000 | crystallin, alpha A                    | CRYAA    | 0.966482 | 2       |
| ENSGALT0000 | crystallin, alpha B                    | CRYAB    | 0.839303 | 158     |
| ENSGALT0000 | crystallin, beta A1                    | CRYBA1   | 0.727853 | 102     |
| ENSGALT0000 | crystallin, beta A2                    | CRYBA2   | 0.235446 | 16      |
| ENSGALT0000 | crystallin, beta A4                    | CRYBA4   | 0.889087 | 83.5001 |
| ENSGALT0000 | crystallin, beta B1                    | CRYBB1   | 0.649745 | 373     |
| ENSGALT0000 | crystallin, beta B3                    | CRYBB3   | ?        | 0       |
| ENSGALT0000 | crystallin, gamma N                    | CRYGN    | 0.779673 | 7       |
| ENSGALT0000 | Gamma S-crystallinUncharacterize       | CRYGS    | 0.853815 | 2       |

|                                                     |            |          |         |
|-----------------------------------------------------|------------|----------|---------|
| ENSGALT0000 crystallin, lambda 1                    | CRYL1      | 0.989895 | 534.502 |
| ENSGALT0000 crystallin, mu                          | CRYM       | 0.866711 | 1867.5  |
| ENSGALT0000 crystallin, zeta (quinone reductase)    | CRYZ       | 0.965019 | 950.5   |
| ENSGALT0000 crystallin, zeta (quinone reductase)    | CRYZL1     | 0.921905 | 493.5   |
| ENSGALT0000 cold shock domain protein A             | CSDA       | 0.671173 | 4415.92 |
| ENSGALT0000 cold shock domain containing C2, FCSDC2 | FCSDC2     | 0.598299 | 714.5   |
| ENSGALT0000 cold shock domain containing E1, FCSE1  | FCSE1      | 0.974814 | 22375.4 |
| ENSGALT0000 CSE1 chromosome segregation 1-1         | CSE1L      | 0.936065 | 3878    |
| ENSGALT0000 colony stimulating factor 1 receptor    | CSF1R      | 0.775371 | 194     |
| ENSGALT0000 colony stimulating factor 2 (granulo    | CSF2       | ?        | 0       |
| ENSGALT0000 colony stimulating factor 2 receptor    | CSF2RB     | 0.98481  | 3       |
| ENSGALT0000 hypothetical protein LOC419620          | CSF3R      | 0.482887 | 17      |
| ENSGALT0000 chondroitin sulfate N-acetylgalacto     | CSGALNACT1 | 0.836195 | 46      |
| ENSGALT0000 chondroitin sulfate N-acetylgalacto     | CSGALNACT2 | 0.976683 | 630.5   |
| ENSGALT0000 c-src tyrosine kinase                   | CSK        | 0.841412 | 2908    |
| ENSGALT0000 CUB and Sushi multiple domains 1        | CSMD1      | 0.93334  | 351.501 |
| ENSGALT0000 CUB and Sushi multiple domains 2        | CSMD2      | 0.899661 | 535.496 |
| ENSGALT0000 CUB and Sushi multiple domains 3        | CSMD3      | 0.958911 | 157     |
| ENSGALT0000 casein kinase 1, alpha 1                | CSNK1A1    | 0.963649 | 5077.08 |
| ENSGALT0000 casein kinase 1, delta                  | CSNK1D     | 0.966231 | 2584.47 |
| ENSGALT0000 casein kinase 1, epsilon                | CSNK1E     | 0.822994 | 1878    |
| ENSGALT0000 casein kinase 1, gamma 1                | CSNK1G1    | 0.813472 | 2382    |
| ENSGALT0000 casein kinase 2, alpha 1 polypeptid     | CSNK2A1    | 0.907634 | 3087.5  |
| ENSGALT0000 casein kinase 2, alpha prime polyp      | CSNK2A2    | 0.921056 | 2709.68 |
| ENSGALT0000 chondroitin sulfate proteoglycan 4      | CSPG4      | 0.996799 | 759.032 |
| ENSGALT0000 centrosome and spindle pole assoc       | CSPP1      | 0.970775 | 285.5   |
| ENSGALT0000 cysteine-serine-rich nuclear protein    | CSRNP1     | 0.908725 | 415     |
| ENSGALT0000 cysteine-serine-rich nuclear protein    | CSRNP3     | 0.97995  | 812.5   |
| ENSGALT0000 cysteine and glycine-rich protein 1     | CSRP1      | 0.997079 | 583     |
| ENSGALT0000 cysteine and glycine-rich protein 2     | CSRP2      | 0.101405 | 4430    |
| ENSGALT0000 CSRP2 binding protein                   | CSRP2BP    | 0.95933  | 1401.5  |
| ENSGALT0000 cysteine and glycine-rich protein 3     | CSRP3      | 0.600865 | 7.5     |
| ENSGALT0000 cystatin C                              | CST3       | 0.550213 | 4991.5  |
| ENSGALT0000 cystatin F (leukocystatin)              | CST7       | 0.853815 | 0.5     |
| ENSGALT0000 cystatin A (stefin A)                   | CSTA       | 0.509252 | 9       |
| ENSGALT0000 cystatin B (stefin B)                   | CSTB       | 0.787939 | 757.5   |
| ENSGALT0000 cleavage stimulation factor, 3' pre-F   | CSTF1      | 0.969441 | 1251    |
| ENSGALT0000 cleavage stimulation factor, 3' pre-F   | CSTF2      | 0.866277 | 2245    |
| ENSGALT0000 cleavage stimulation factor, 3' pre-F   | CSTF3      | 0.967301 | 1798    |
| ENSGALT0000 CTAGE family, member 5                  | CTAGE5     | 0.976456 | 723.5   |
| ENSGALT0000 C-terminal binding protein 1            | CTBP1      | 0.918779 | 7005.05 |
| ENSGALT0000 C-terminal binding protein 2            | CTBP2      | 0.927744 | 4800.73 |
| ENSGALT0000 chitobiase, di-N-acetyl-                | CTBS       | 0.992    | 566     |
| ENSGALT0000 CTS telomere maintenance comple         | CTC1       | 0.977385 | 160.5   |
| ENSGALT0000 CCCTC-binding factor (zinc finger p     | CTCF       | 0.951556 | 3545.96 |
| ENSGALT0000 CTD (carboxy-terminal domain, RN        | CTDP1      | 0.996019 | 916.5   |
| ENSGALT0000 CTD (carboxy-terminal domain, RN        | CTDSPL     | 0.999596 | 1053    |
| ENSGALT0000 CTD (carboxy-terminal domain, RN        | CTDSPL2    | 0.992959 | 1610.5  |
| ENSGALT0000 connective tissue growth factor         | CTGF       | 0.786667 | 1116    |
| ENSGALT0000 cystathionase (cystathionine gamm       | CTH        | 0.768361 | 3350.5  |
| ENSGALT0000 collagen triple helix repeat containi   | CTHRC1     | 0.654019 | 1375.5  |
| ENSGALT0000 CBP80/20-dependent translation in       | CTIF       | 0.846095 | 301.499 |
| ENSGALT0000 cytotoxic T-lymphocyte-associated       | CTLA4      | 0.937481 | 51      |
| ENSGALT0000 catenin (cadherin-associated protei     | CTNNA1     | 0.95119  | 11818.5 |
| ENSGALT0000 catenin (cadherin-associated protei     | CTNNA2     | 0.817608 | 6138    |
| ENSGALT0000 catenin (cadherin-associated protei     | CTNNA3     | 0.570192 | 10.5    |

|                                                    |           |          |         |
|----------------------------------------------------|-----------|----------|---------|
| ENSGALT0000 catenin (cadherin-associated protei    | CTNNAL1   | 0.981654 | 1394    |
| ENSGALT0000 catenin (cadherin-associated protei    | CTNNB1    | 0.996454 | 53763.3 |
| ENSGALT0000 catenin, beta interacting protein 1    | CTNNBIP1  | 0.96382  | 1006.5  |
| ENSGALT0000 catenin, beta like 1                   | CTNNBL1   | 0.848731 | 1887    |
| ENSGALT0000 catenin (cadherin-associated protei    | CTNND1    | 0.98334  | 8387.99 |
| ENSGALT0000 catenin (cadherin-associated protei    | CTNND2    | 0.854248 | 1969.94 |
| ENSGALT0000 cystinosin, lysosomal cystine transp   | CTNS      | 0.930487 | 423.5   |
| ENSGALT0000 CTP synthase                           | CTPS      | 0.716727 | 1922.5  |
| ENSGALT0000 CTP synthase II                        | CTPS2     | 0.975486 | 577.503 |
| ENSGALT0000 Ctr9, Paf1/RNA polymerase II com       | CTR9      | 0.977805 | 2278    |
| ENSGALT0000 chymotrypsin C (caldecrin)             | CTRC      | 0.980328 | 2       |
| ENSGALT0000 chymotrypsin-like                      | CTRL      | 0.927729 | 1       |
| ENSGALT0000 cathepsin A                            | CTSA      | 0.858894 | 3462    |
| ENSGALT0000 cathepsin B                            | CTSB      | 0.940001 | 8680.22 |
| ENSGALT0000 cathepsin C                            | CTSC      | 0.901787 | 2379    |
| ENSGALT0000 cathepsin D                            | CTSD      | 0.931251 | 3768    |
| ENSGALT0000 cathepsin E                            | CTSE      | 0.853815 | 1       |
| ENSGALT0000 cathepsin H                            | CTSH      | 0.955289 | 1644    |
| ENSGALT0000 cathepsin L2                           | CTSL2     | 0.863259 | 4330.97 |
| ENSGALT0000 cathepsin O                            | CTSO      | 0.993101 | 750     |
| ENSGALT0000 cathepsin S                            | CTSS      | 0.539658 | 122     |
| ENSGALT0000 cathepsin Z                            | CTSZ      | 0.792839 | 1645    |
| ENSGALT0000 cortactin                              | CTTN      | 0.943716 | 2606.53 |
| ENSGALT0000 cortactin binding protein 2            | CTTNBP2   | 0.932961 | 868.5   |
| ENSGALT0000 CTTNBP2 N-terminal like                | CTTNBP2NL | 0.967575 | 1173    |
| ENSGALT0000 cytosolic thiouridylase subunit 2 ho   | CTU2      | 0.695946 | 605     |
| ENSGALT0000 cortexin 1                             | CTXN1     | 0.811334 | 24      |
| ENSGALT0000 cortexin 3                             | CTXN3     | 0.464758 | 0       |
| ENSGALT0000 cubilin (intrinsic factor-cobalamin re | CUBN      | 0.998057 | 92      |
| ENSGALT0000 CUE domain containing 1                | CUEDC1    | 0.9879   | 972.5   |
| ENSGALT0000 CUE domain containing 2                | CUEDC2    | 0.882387 | 559     |
| ENSGALT0000 cullin 1                               | CUL1      | 0.980595 | 1882    |
| ENSGALT0000 cullin 2                               | CUL2      | 0.954393 | 1197    |
| ENSGALT0000 cullin 3                               | CUL3      | 0.947293 | 2422    |
| ENSGALT0000 cullin 4B                              | CUL4B     | 0.964042 | 1820    |
| ENSGALT0000 cullin 5                               | CUL5      | 0.974082 | 842.5   |
| ENSGALT0000 cullin 9                               | CUL9      | 0.952593 | 2454.55 |
| ENSGALT0000 cutA divalent cation tolerance hom     | CUTA      | 0.862085 | 141.5   |
| ENSGALT0000 cutC copper transporter homolog (E     | CUTC      | 0.838218 | 1101    |
| ENSGALT0000 cut-like homeobox 2                    | CUX2      | 0.893692 | 3238.5  |
| ENSGALT0000 CUB and zona pellucida-like domai      | CUZD1     | 0.464758 | 0       |
| ENSGALT0000 CWC15 spliceosome-associated pr        | CWC15     | 0.815064 | 1760.5  |
| ENSGALT0000 CWC22 spliceosome-associated pr        | CWC22     | 0.982673 | 1148.5  |
| ENSGALT0000 CWC25 spliceosome-associated pr        | CWC25     | 0.890323 | 532     |
| ENSGALT0000 CWC27 spliceosome-associated pr        | CWC27     | 0.875172 | 360.5   |
| ENSGALT0000 CWF19-like 1, cell cycle control (S.   | CWF19L1   | 0.816616 | 1071.49 |
| ENSGALT0000 CWF19-like 2, cell cycle control (S.   | CWF19L2   | 0.954317 | 440.5   |
| ENSGALT0000 cell wall biogenesis 43 C-terminal r   | CWH43     | 0.790807 | 70      |
| ENSGALT0000 chemokine (C-X3-C motif) ligand 1      | CX3CL1    | 0.880639 | 14.5    |
| ENSGALT0000 coxsackie virus and adenovirus rec     | CXADR     | 0.915823 | 1304.5  |
| ENSGALT0000 chemokine (C-X-C motif) ligand 12      | CXCL12    | 0.996301 | 693.494 |
| ENSGALT0000 chemokine                              | CXCL13L2  | 0.480067 | 11      |
| ENSGALT0000 chemokine (C-X-C motif) ligand 14      | CXCL14    | 0.450135 | 990.999 |
| ENSGALT0000 chemokine (C-X-C motif) receptor 4     | CXCR4     | 0.611253 | 684.5   |
| ENSGALT0000 \N                                     | CXCR5     | 0.783262 | 2.5     |
| ENSGALT0000 chromosome X open reading frame        | CXorf21   | 0.853815 | 0.5     |

|                                                        |         |           |          |
|--------------------------------------------------------|---------|-----------|----------|
| ENSGALT0000 chromosome X open reading frame CXorf23    |         | 0.998281  | 113      |
| ENSGALT0000 chromosome X open reading frame CXorf30    |         | 0.936648  | 13.5     |
| ENSGALT0000 chromosome X open reading frame CXorf69    |         | 0.814405  | 45.5     |
| ENSGALT0000 CXXC finger protein 5                      | CXXC5   | 0.942833  | 1051.5   |
| ENSGALT0000 cytochrome b-561                           | CYB561  | 0.988467  | 151      |
| ENSGALT0000 cytochrome b5 type A (microsomal)          | CYB5A   | 0.419894  | 2064.5   |
| ENSGALT0000 outer mitochondrial membrane cytochrome b5 | CYB5B   | 0.621822  | 2647.53  |
| ENSGALT0000 cytochrome b5 domain containing 2          | CYB5D2  | 0.881175  | 620      |
| ENSGALT0000 cytochrome b5 reductase 2                  | CYB5R2  | 0.92635   | 849.757  |
| ENSGALT0000 cytochrome b5 reductase 3                  | CYB5R3  | 0.749082  | 1805.5   |
| ENSGALT0000 cytochrome b5 reductase 4                  | CYB5R4  | 0.918666  | 462.5    |
| ENSGALT0000 cytochrome b5 reductase-like               | CYB5RL  | 0.970007  | 958      |
| ENSGALT0000 cytochrome b, ascorbate dependent          | CYBASC3 | 0.794623  | 410.5    |
| ENSGALT0000 cytochrome b-245, beta polypeptide         | CYBB    | 0.794244  | 8        |
| ENSGALT0000 cytochrome b reductase 1                   | CYBRD1  | 0.930976  | 45       |
| ENSGALT0000 cytochrome c, somatic                      | CYCS    | 0.454064  | 1974.52  |
| ENSGALT0000 cytoplasmic FMR1 interacting protein 1     | CYFIP1  | 0.951477  | 4175     |
| ENSGALT0000 cytoplasmic FMR1 interacting protein 2     | CYFIP2  | 0.921451  | 2235.5   |
| ENSGALT0000 cytoglobin                                 | CYGB    | 0.752484  | 1373.02  |
| ENSGALT0000 cysteine/histidine-rich 1                  | CYHR1   | 0.948171  | 394.5    |
| ENSGALT0000 cylindromatosis (turban tumor syndrome)    | CYLD    | 0.984698  | 625      |
| ENSGALT0000 cytochrome P450, family 11, subfamily A1   | CYP11A1 | 0.843205  | 29.5     |
| ENSGALT0000 cytochrome P450, family 17, subfamily A1   | CYP17A1 | 0.264959  | 68.5     |
| ENSGALT0000 cytochrome P450, family 19, subfamily A1   | CYP19A1 | ?         | 0        |
| ENSGALT0000 cytochrome P450 1A4                        | CYP1A4  | 0.761653  | 3.60764  |
| ENSGALT0000 cytochrome P450, family 1, subfamily B1    | CYP1B1  | 0.775537  | 6.5      |
| ENSGALT0000 cytochrome P450, family 20, subfamily A1   | CYP20A1 | 0.984947  | 1357.5   |
| ENSGALT0000 steroid 21-hydroxylase                     | CYP21   | 0.515776  | 111.5    |
| ENSGALT0000 cytochrome P450, family 24, subfamily A1   | CYP24A1 | 0.798612  | 659.027  |
| ENSGALT0000 cytochrome P450, family 26, subfamily A1   | CYP26A1 | 0.48684   | 50       |
| ENSGALT0000 cytochrome P450, family 26, subfamily B1   | CYP26B1 | 0.673637  | 286      |
| ENSGALT0000 cytochrome P450, family 26, subfamily C1   | CYP26C1 | 0.406724  | 1880.53  |
| ENSGALT0000 cytochrome P450, family 27, subfamily A1   | CYP27A1 | 0.904126  | 587      |
| ENSGALT0000 cytochrome P450, family 27, subfamily C1   | CYP27C1 | 0.954403  | 1200.5   |
| ENSGALT0000 cytochrome P450, family 2, subfamily A13   | CYP2A13 | 0.859039  | 19.5     |
| ENSGALT0000 cytochrome P450, family 2, subfamily C18   | CYP2C18 | 0.308204  | 1.74E-08 |
| ENSGALT0000 cytochrome P-450 2C45                      | CYP2C45 | 0.759049  | 7.5      |
| ENSGALT0000 cytochrome P450, family 2, subfamily D6    | CYP2D6  | 0.981042  | 388.5    |
| ENSGALT0000 cytochrome P450 2H1                        | CYP2H1  | 0.954809  | 8.5      |
| ENSGALT0000 cytochrome P450, family 2, subfamily J2    | CYP2J2  | 0.992592  | 1214.95  |
| ENSGALT0000 cytochrome P450, family 2, subfamily R1    | CYP2R1  | 0.966144  | 179      |
| ENSGALT0000 cytochrome P450, family 2, subfamily W1    | CYP2W1  | 0.996935  | 81.5     |
| ENSGALT0000 cytochrome P450, family 39, subfamily A1   | CYP39A1 | 0.86812   | 297.5    |
| ENSGALT0000 cytochrome P450, family 3, subfamily A4    | CYP3A4  | 0.905015  | 30.5     |
| ENSGALT0000 cytochrome P450 A 37                       | CYP3A7  | 0.0539949 | 3        |
| ENSGALT0000 cytochrome P450, family 46, subfamily A1   | CYP46A1 | 0.980004  | 298      |
| ENSGALT0000 cytochrome P450, family 4, subfamily B1    | CYP4B1  | 0.90773   | 2.5      |
| ENSGALT0000 cytochrome P450, family 4, subfamily V2    | CYP4V2  | 0.634746  | 15.5     |
| ENSGALT0000 cytochrome P450, family 51, subfamily A1   | CYP51A1 | 0.637697  | 1087     |
| ENSGALT0000 cytochrome P450, family 7, subfamily A1    | CYP7A1  | ?         | 0        |
| ENSGALT0000 IN                                         | CYP8B1  | 0.834058  | 7.5      |
| ENSGALT0000 cysteine-rich, angiogenic inducer, 6       | CYR61   | 0.918912  | 729      |
| ENSGALT0000 cysteinyl leukotriene receptor 1           | CYSLTR1 | 0.996049  | 25.5     |
| ENSGALT0000 cysteinyl leukotriene receptor 2           | CYSLTR2 | 0.363607  | 1        |
| ENSGALT0000 Cytochrome b                               | CYTB    | 0.87101   | 95721.5  |
| ENSGALT0000 cytohesin 1                                | CYTH1   | 0.907959  | 484.5    |



|                                                         |              |           |         |
|---------------------------------------------------------|--------------|-----------|---------|
| ENSGALT0000 cytohesin 3                                 | CYTH3        | 0.863964  | 305.501 |
| ENSGALT0000 cytohesin 4                                 | CYTH4        | 0.851285  | 8.5     |
| ENSGALT0000 cytohesin 1 interacting protein             | CYTIP        | 0.389843  | 8.5     |
| ENSGALT0000 cytokine-like 1                             | CYTL1        | 0.210435  | 523     |
| ENSGALT0000 cysteine/tyrosine-rich 1                    | CYYR1        | 0.899859  | 229.5   |
| ENSGALT0000 chromosome Z open reading frame CZH18orf10  |              | 0.912588  | 245     |
| ENSGALT0000 chromosome Z open reading frame CZH18orf25  |              | 0.983837  | 258.799 |
| ENSGALT0000 chromosome Z open reading frame CZH20orf134 |              | 0.845636  | 3.5     |
| ENSGALT0000 chromosome Z open reading frame CZH5orf28   |              | 0.916828  | 277.5   |
| ENSGALT0000 chromosome Z open reading frame CZH5orf30   |              | 0.909044  | 281     |
| ENSGALT0000 chromosome Z open reading frame CZH5orf34   |              | 0.937539  | 132.5   |
| ENSGALT0000 chromosome Z open reading frame CZH5orf44   |              | 0.927988  | 440.499 |
| ENSGALT0000 chromosome Z open reading frame CZH5orf51   |              | 0.521283  | 353.5   |
| ENSGALT0000 chromosome Z open reading frame CZH9orf100  |              | 0.930794  | 237     |
| ENSGALT0000 chromosome Z open reading frame CZH9orf125  |              | 0.932522  | 155     |
| ENSGALT0000 chromosome Z open reading frame CZH9orf150  |              | 0.700891  | 93      |
| ENSGALT0000 chromosome Z open reading frame CZH9orf24   |              | 0.0441942 | 1       |
| ENSGALT0000 chromosome Z open reading frame CZH9orf25   |              | 0.832335  | 251.5   |
| ENSGALT0000 chromosome Z open reading frame CZH9orf3    |              | 0.974403  | 226     |
| ENSGALT0000 chromosome Z open reading frame CZH9orf64   |              | 0.541531  | 494.5   |
| ENSGALT0000 chromosome Z open reading frame CZH9orf72   |              | 0.910508  | 156.5   |
| ENSGALT0000 chromosome Z open reading frame CZH9orf80   |              | 0.774448  | 1113.5  |
| ENSGALT0000 chromosome Z open reading frame CZH9orf82   |              | 0.90402   | 366.5   |
| ENSGALT0000 chromosome Z open reading frame CZH9orf95   |              | 0.992586  | 139.5   |
| ENSGALT0000 D-2-hydroxyglutarate dehydrogenase          | D2HGDH       | 0.845703  | 296     |
| ENSGALT0000 Uncharacterized protein                     | D6R3D0_CHICK | 0.954028  | 3.5     |
| ENSGALT0000 Uncharacterized protein                     | D9IAG9_CHICK | 0.916294  | 48.5    |
| ENSGALT0000 Sodium iodide symporter                     | D9IAH0_CHICK | 0.353553  | 1       |
| ENSGALT0000 dishevelled associated activator of         | DAAM1        | 0.9225    | 2070    |
| ENSGALT0000 dishevelled associated activator of         | DAAM2        | 0.946284  | 242.5   |
| ENSGALT0000 disabled homolog 1 (Drosophila)             | DAB1         | 0.995892  | 1035.5  |
| ENSGALT0000 disabled homolog 2, mitogen-respc           | DAB2         | 0.973673  | 302.499 |
| ENSGALT0000 DAB2 interacting protein                    | DAB2IP       | 0.900971  | 1062.5  |
| ENSGALT0000 dachshund homolog 1 (Drosophila)            | DACH1        | 0.954295  | 1061.5  |
| ENSGALT0000 dachshund homolog 2 (Drosophila)            | DACH2        | 0.732888  | 365     |
| ENSGALT0000 dapper, antagonist of beta-catenin,         | DACT1        | 0.841783  | 1815.89 |
| ENSGALT0000 dapper, antagonist of beta-catenin,         | DACT2        | 0.750228  | 185     |
| ENSGALT0000 defender against cell death 1               | DAD1         | 0.440857  | 3145.97 |
| ENSGALT0000 diacylglycerol lipase, alpha                | DAGLA        | 0.911122  | 773     |
| ENSGALT0000 diacylglycerol lipase, beta                 | DAGLB        | 0.98327   | 872.505 |
| ENSGALT0000 dihydroxyacetone kinase 2 homolo            | DAK          | 0.689051  | 966     |
| ENSGALT0000 DALR anticodon binding domain cc            | DALRD3       | 0.934167  | 1152.5  |
| ENSGALT0000 D-amino-acid oxidase                        | DAO          | 0.949508  | 179.5   |
| ENSGALT0000 death-associated protein                    | DAP          | 0.920937  | 3841    |
| ENSGALT0000 death associated protein 3                  | DAP3         | 0.787503  | 1678.5  |
| ENSGALT0000 death-associated protein kinase 1           | DAPK1        | 0.989271  | 822.502 |
| ENSGALT0000 death-associated protein kinase 2           | DAPK2        | 0.987623  | 65.5    |
| ENSGALT0000 death associated protein-like 1             | DAPL1        | 0.740073  | 24      |
| ENSGALT0000 dual adaptor of phosphotyrosine ar          | DAPP1        | 0.973483  | 337     |
| ENSGALT0000 aspartyl-tRNA synthetase                    | DARS         | 0.773721  | 3100    |
| ENSGALT0000 aspartyl-tRNA synthetase 2, mitoch          | DARS2        | 0.92793   | 435     |
| ENSGALT0000 chromosomal passenger complex p             | DASRAA       | 0.959866  | 374     |
| ENSGALT0000 DAZ associated protein 1                    | DAZAP1       | 0.962365  | 2746.5  |
| ENSGALT0000 deleted in azoospermia-like                 | DAZL         | 0.849633  | 10      |
| ENSGALT0000 deleted in bladder cancer 1                 | DBC1         | 0.689923  | 1854.5  |
| ENSGALT0000 DBF4 homolog (S. cerevisiae)                | DBF4         | 0.978272  | 653     |

|                                                              |         |           |         |
|--------------------------------------------------------------|---------|-----------|---------|
| ENSGALT0000 DBF4 homolog B ( <i>S. cerevisiae</i> )          | DBF4B   | 0.900673  | 105.5   |
| ENSGALT0000 dopamine beta-hydroxylase (dopar)                | DBH     | 0.0634553 | 0.5     |
| ENSGALT0000 diazepam binding inhibitor (GABA <sub>A</sub> r) | DBI     | 0.165669  | 2938.98 |
| ENSGALT0000 dysbindin (dystrobrevin binding pro)             | DBNDD1  | 0.832589  | 2115    |
| ENSGALT0000 dysbindin (dystrobrevin binding pro)             | DBNDD2  | 0.882895  | 803.5   |
| ENSGALT0000 drebrin-like                                     | DBNL    | 0.891912  | 2055    |
| ENSGALT0000 debranching enzyme homolog 1 (S)                 | DBR1    | 0.890428  | 1518.5  |
| ENSGALT0000 dihydrolipoamide branched chain tr               | DBT     | 0.984307  | 778.5   |
| ENSGALT0000 developing brain homeobox 2                      | DBX2    | 0.98096   | 349.5   |
| ENSGALT0000 DDB1 and CUL4 associated factor                  | DCAF10  | 0.981445  | 617.5   |
| ENSGALT0000 DDB1 and CUL4 associated factor                  | DCAF12  | 0.973159  | 2576    |
| ENSGALT0000 DDB1 and CUL4 associated factor                  | DCAF13  | 0.934563  | 2346    |
| ENSGALT0000 DDB1 and CUL4 associated factor                  | DCAF17  | 0.949366  | 254     |
| ENSGALT0000 DDB1 and CUL4 associated factor                  | DCAF4   | 0.953744  | 614.5   |
| ENSGALT0000 DDB1 and CUL4 associated factor                  | DCAF5   | 0.959212  | 1031    |
| ENSGALT0000 DDB1 and CUL4 associated factor                  | DCAF6   | 0.987381  | 993.5   |
| ENSGALT0000 DDB1 and CUL4 associated factor                  | DCAF7   | 0.955071  | 2341    |
| ENSGALT0000 discoidin, CUB and LCCL domain c                 | DCBLD1  | 0.839288  | 1534.5  |
| ENSGALT0000 discoidin, CUB and LCCL domain c                 | DCBLD2  | 0.995502  | 5594.32 |
| ENSGALT0000 doublecortin domain containing 2                 | DCDC2   | 0.371698  | 9       |
| ENSGALT0000 dachsous 1 ( <i>Drosophila</i> )                 | DCHS1   | 0.984001  | 7686.99 |
| ENSGALT0000 dachsous 2 ( <i>Drosophila</i> )                 | DCHS2   | 0.649304  | 2.5     |
| ENSGALT0000 deoxycytidine kinase                             | DCK     | 0.979619  | 673.501 |
| ENSGALT0000 doublecortin-like kinase 1                       | DCLK1   | 0.909817  | 1423    |
| ENSGALT0000 doublecortin-like kinase 2                       | DCLK2   | 0.97709   | 952     |
| ENSGALT0000 doublecortin-like kinase 3                       | DCLK3   | 0.69644   | 17.5    |
| ENSGALT0000 DNA cross-link repair 1A                         | DCLRE1A | 0.9561    | 593.5   |
| ENSGALT0000 DNA cross-link repair 1B                         | DCLRE1B | 0.94658   | 241.5   |
| ENSGALT0000 DNA cross-link repair 1C                         | DCLRE1C | 0.993154  | 311.5   |
| ENSGALT0000 decorin                                          | DCN     | 0.854111  | 639.503 |
| ENSGALT0000 DCP1 decapping enzyme homolog                    | DCP1A   | 0.973318  | 322.5   |
| ENSGALT0000 DCP1 decapping enzyme homolog                    | DCP1B   | 0.979564  | 996.5   |
| ENSGALT0000 DCP2 decapping enzyme homolog                    | DCP2    | 0.974322  | 155.5   |
| ENSGALT0000 decapping enzyme, scavenger                      | DCPS    | 0.772294  | 2127.5  |
| ENSGALT0000 dopachrome tautomerase (dopachr)                 | DCT     | 0.676252  | 5.5     |
| ENSGALT0000 dCMP deaminase                                   | DCTD    | 0.913626  | 875     |
| ENSGALT0000 dynactin 3 (p22)                                 | DCTN3   | 0.588922  | 798     |
| ENSGALT0000 dynactin 4 (p62)                                 | DCTN4   | 0.884896  | 2712.5  |
| ENSGALT0000 dynactin 5 (p25)                                 | DCTN5   | 0.639348  | 1103    |
| ENSGALT0000 dynactin 6                                       | DCTN6   | 0.0988666 | 2157    |
| ENSGALT0000 DCN1, defective in cullin neddylic               | DCUN1D1 | 0.950105  | 1176.5  |
| ENSGALT0000 DCN1, defective in cullin neddylic               | DCUN1D2 | 0.991605  | 266     |
| ENSGALT0000 DCN1, defective in cullin neddylic               | DCUN1D3 | 0.905495  | 310     |
| ENSGALT0000 DCN1, defective in cullin neddylic               | DCUN1D4 | 0.917376  | 550     |
| ENSGALT0000 DCN1, defective in cullin neddylic               | DCUN1D5 | 0.856161  | 451     |
| ENSGALT0000 doublecortin                                     | DCX     | 0.808233  | 1294    |
| ENSGALT0000 dicarbonyl/L-xylulose reductase                  | DCXR    | 0.812791  | 1262.48 |
| ENSGALT0000 DET1- and DDB1-associated prote                  | DDA1    | 0.946794  | 2960.5  |
| ENSGALT0000 dimethylarginine dimethylaminohyc                | DDAH1   | 0.809156  | 433.5   |
| ENSGALT0000 damage-specific DNA binding prote                | DDB1    | 0.898816  | 7930.83 |
| ENSGALT0000 damage-specific DNA binding prote                | DDB2    | 0.976691  | 1041.5  |
| ENSGALT0000 dopa decarboxylase (aromatic L-ar                | DDC     | 0.782804  | 4.5     |
| ENSGALT0000 DDHD domain containing 1                         | DDHD1   | 0.992015  | 1537    |
| ENSGALT0000 DDHD domain containing 2                         | DDHD2   | 0.881539  | 678.5   |
| ENSGALT0000 DNA-damage inducible 1 homolog                   | DDI2    | 0.912575  | 488     |
| ENSGALT0000 D-aspartate oxidase                              | DDO     | 0.533681  | 11.5    |

|                                                      |          |         |
|------------------------------------------------------|----------|---------|
| ENSGALT0000 dolichyl-diphosphooligosaccharide- DDOST | 0.961608 | 9876.5  |
| ENSGALT0000 discoidin domain receptor tyrosine DDR2  | 0.888962 | 942.893 |
| ENSGALT0000 DDRGK domain containing 1 DDRGK1         | 0.807965 | 929.461 |
| ENSGALT0000 D-dopachrome tautomerase DDT             | 0.83558  | 1802    |
| ENSGALT0000 DEAD (Asp-Glu-Ala-Asp) box polyϕ DDX1    | 0.932438 | 3292.43 |
| ENSGALT0000 DEAD (Asp-Glu-Ala-Asp) box polyϕ DDX10   | 0.910687 | 767.5   |
| ENSGALT0000 DEAD/H (Asp-Glu-Ala-Asp/His) bo DDX11    | 0.908783 | 517.5   |
| ENSGALT0000 DEAD (Asp-Glu-Ala-Asp) box polyϕ DDX17   | 0.978576 | 11981.5 |
| ENSGALT0000 DEAD (Asp-Glu-Ala-Asp) box polyϕ DDX18   | 0.946379 | 887     |
| ENSGALT0000 DEAD (Asp-Glu-Ala-Asp) box polyϕ DDX19B  | 0.927088 | 8231.36 |
| ENSGALT0000 DEAD (Asp-Glu-Ala-Asp) box polyϕ DDX20   | 0.945033 | 639.499 |
| ENSGALT0000 DEAD (Asp-Glu-Ala-Asp) box polyϕ DDX21   | 0.81118  | 2935.16 |
| ENSGALT0000 DEAD (Asp-Glu-Ala-Asp) box polyϕ DDX25   | 0.946944 | 579.5   |
| ENSGALT0000 DEAD/H (Asp-Glu-Ala-Asp/His) bo DDX26B   | 0.98067  | 1060    |
| ENSGALT0000 DEAD (Asp-Glu-Ala-Asp) box polyϕ DDX27   | 0.935784 | 1922.53 |
| ENSGALT0000 DEAD (Asp-Glu-Ala-Asp) box polyϕ DDX28   | 0.506883 | 193     |
| ENSGALT0000 DEAD (Asp-Glu-Ala-Asp) box polyϕ DDX31   | 0.972014 | 1043.5  |
| ENSGALT0000 DEAD (Asp-Glu-Ala-Asp) box polyϕ DDX3X   | 0.969649 | 18378.4 |
| ENSGALT0000 DEAD (Asp-Glu-Ala-Asp) box polyϕ DDX4    | 0.464758 | 1       |
| ENSGALT0000 DEAD (Asp-Glu-Ala-Asp) box polyϕ DDX41   | 0.830124 | 2086.5  |
| ENSGALT0000 DEAD (Asp-Glu-Ala-Asp) box polyϕ DDX42   | 0.915379 | 3956.54 |
| ENSGALT0000 DEAD (Asp-Glu-Ala-Asp) box polyϕ DDX43   | 0.864202 | 5       |
| ENSGALT0000 DEAD (Asp-Glu-Ala-Asp) box polyϕ DDX46   | 0.971878 | 2466    |
| ENSGALT0000 DEAD (Asp-Glu-Ala-Asp) box polyϕ DDX47   | 0.887799 | 987     |
| ENSGALT0000 DEAD (Asp-Glu-Ala-Asp) box polyϕ DDX49   | 0.853898 | 1314.01 |
| ENSGALT0000 DEAD (Asp-Glu-Ala-Asp) box polyϕ DDX5    | 0.916838 | 27532.4 |
| ENSGALT0000 DEAD (Asp-Glu-Ala-Asp) box polyϕ DDX50   | 0.951879 | 1958.82 |
| ENSGALT0000 DEAD (Asp-Glu-Ala-Asp) box polyϕ DDX51   | 0.924874 | 1032    |
| ENSGALT0000 DEAD (Asp-Glu-Ala-Asp) box polyϕ DDX52   | 0.979924 | 571.999 |
| ENSGALT0000 DEAD (Asp-Glu-Ala-Asp) box polyϕ DDX55   | 0.973899 | 403.522 |
| ENSGALT0000 DEAD (Asp-Glu-Ala-Asp) box polyϕ DDX59   | 0.976857 | 419.48  |
| ENSGALT0000 DEAD (Asp-Glu-Ala-Asp) box polyϕ DDX6    | 0.970067 | 3909.5  |
| ENSGALT0000 deformed epidermal autoregulatory DEAF1  | 0.938485 | 258.5   |
| ENSGALT0000 2,4-dienoyl CoA reductase 1, mitoc DECR1 | 0.86031  | 770.5   |
| ENSGALT0000 death effector domain containing DEDD    | 0.91312  | 2181    |
| ENSGALT0000 differentially expressed in FDCP 6 DEF6  | 0.980625 | 1339    |
| ENSGALT0000 defensin, beta 1 DEFB1                   | 0.433517 | 5       |
| ENSGALT0000 degenerative spermatocyte homolc DEGS1   | 0.796181 | 1927.5  |
| ENSGALT0000 degenerative spermatocyte homolc DEGS2   | 0.748423 | 5.5     |
| ENSGALT0000 DEK oncogene DEK                         | 0.953538 | 1664    |
| ENSGALT0000 hypothetical protein LOC417102 DENND1A   | 0.959721 | 922.001 |
| ENSGALT0000 DENN/MADD domain containing 1 DENND1B    | 0.940665 | 196.5   |
| ENSGALT0000 DENN/MADD domain containing 2 DENND2A    | 0.997874 | 4204    |
| ENSGALT0000 DENN/MADD domain containing 2 DENND2C    | 0.96214  | 245     |
| ENSGALT0000 DENN/MADD domain containing 2 DENND2D    | 0.799598 | 81      |
| ENSGALT0000 DENN/MADD domain containing 3 DENND3     | 0.882921 | 153     |
| ENSGALT0000 DENN/MADD domain containing 4 DENND4A    | 0.979838 | 875     |
| ENSGALT0000 DENN/MADD domain containing 4 DENND4C    | 0.999079 | 806     |
| ENSGALT0000 DENN/MADD domain containing 5 DENND5A    | 0.922413 | 1032.51 |
| ENSGALT0000 DENN/MADD domain containing 5 DENND5B    | 0.81723  | 338.5   |
| ENSGALT0000 density-regulated protein DENR           | 0.834961 | 1101.5  |
| ENSGALT0000 DEP domain containing 1 DEPDC1           | 0.931976 | 259     |
| ENSGALT0000 DEP domain containing 1B DEPDC1B         | 0.965553 | 268     |
| ENSGALT0000 DEP domain containing 5 DEPDC5           | 0.987622 | 1765    |
| ENSGALT0000 DEP domain containing 6 DEPDC6           | 0.590624 | 36.5    |
| ENSGALT0000 DEP domain containing 7 DEPDC7           | 0.967013 | 171     |

|                                                 |        |          |         |
|-------------------------------------------------|--------|----------|---------|
| ENSGALT0000 DEP domain containing MTOR-inte     | DEPTOR | 0.797043 | 5.5     |
| ENSGALT0000 deoxyribose-phosphate aldolase (p   | DERA   | 0.880532 | 598.5   |
| ENSGALT0000 Der1-like domain family, member 1   | DERL1  | 0.964839 | 4176    |
| ENSGALT0000 Der1-like domain family, member 2   | DERL2  | 0.893179 | 376     |
| ENSGALT0000 Der1-like domain family, member 3   | DERL3  | 0.96268  | 558.503 |
| ENSGALT0000 desmin                              | DES    | 0.707813 | 88.5044 |
| ENSGALT0000 de-etiolated homolog 1 (Arabidopsi  | DET1   | 0.986664 | 1053    |
| ENSGALT0000 Dexi homolog (mouse)                | DEXI   | 0.950976 | 15.5    |
| ENSGALT0000 DNA fragmentation factor, 45kDa, ε  | DFFA   | 0.733125 | 689     |
| ENSGALT0000 DNA fragmentation factor, 40kDa, κ  | DFFB   | 0.915012 | 140     |
| ENSGALT0000 deafness, autosomal dominant 5      | DFNA5  | 0.955935 | 1836    |
| ENSGALT0000 deafness, autosomal recessive 31    | DFNB31 | 0.76859  | 351     |
| ENSGALT0000 deafness, autosomal recessive 59    | DFNB59 | 0.194846 | 5       |
| ENSGALT0000 diacylglycerol O-acyltransferase 2  | DGAT2  | 0.963713 | 62      |
| ENSGALT0000 DiGeorge syndrome critical region   | DGCR14 | 0.997644 | 647     |
| ENSGALT0000 DiGeorge syndrome critical region   | DGCR2  | 0.995952 | 3226.47 |
| ENSGALT0000 DGCR6 homolog                       | DGCR6  | 0.665524 | 2695.5  |
| ENSGALT0000 DiGeorge syndrome critical region   | DGCR8  | 0.975329 | 1748.5  |
| ENSGALT0000 diacylglycerol kinase, beta 90kDa   | DGKB   | 0.821307 | 64.5    |
| ENSGALT0000 diacylglycerol kinase, delta 130kDa | DGKD   | 0.984154 | 1156    |
| ENSGALT0000 diacylglycerol kinase, epsilon 64kD | DGKE   | 0.912465 | 815.488 |
| ENSGALT0000 diacylglycerol kinase, gamma 90kD   | DGKG   | 0.821392 | 70      |
| ENSGALT0000 diacylglycerol kinase, eta          | DGKH   | 0.97317  | 105.5   |
| ENSGALT0000 diacylglycerol kinase, iota         | DGKI   | 0.946616 | 139.5   |
| ENSGALT0000 diacylglycerol kinase, theta 110kDa | DGKQ   | 0.971546 | 295.5   |
| ENSGALT0000 diacylglycerol kinase, zeta         | DGKZ   | 0.981686 | 3292.43 |
| ENSGALT0000 deoxyguanosine kinase               | DGUOK  | 0.755262 | 1680.5  |
| ENSGALT0000 24-dehydrocholesterol reductase     | DHCR24 | 0.785051 | 1306.5  |
| ENSGALT0000 7-dehydrocholesterol reductase      | DHCR7  | 0.874629 | 756     |
| ENSGALT0000 dehydrodolichyl diphosphate synth   | DHDDS  | 0.962744 | 677.5   |
| ENSGALT0000 dihydrofolate reductase             | DHFR   | 0.735749 | 134     |
| ENSGALT0000 dihydroorotate dehydrogenase        | DHODH  | 0.763693 | 1049.5  |
| ENSGALT0000 dehydrogenase/reductase (SDR fa     | DHRS11 | 0.891211 | 1082.5  |
| ENSGALT0000 dehydrogenase/reductase (SDR fa     | DHRS12 | 0.94186  | 147.5   |
| ENSGALT0000 dehydrogenase/reductase (SDR fa     | DHRS13 | 0.50498  | 50      |
| ENSGALT0000 dehydrogenase/reductase (SDR fa     | DHRS2  | 0.883977 | 1195.5  |
| ENSGALT0000 dehydrogenase/reductase (SDR fa     | DHRS3  | 0.638354 | 515     |
| ENSGALT0000 dehydrogenase/reductase (SDR fa     | DHRS7  | 0.952794 | 1775.5  |
| ENSGALT0000 dehydrogenase/reductase (SDR fa     | DHRS7B | 0.960158 | 463     |
| ENSGALT0000 dehydrogenase/reductase (SDR fa     | DHRS7C | 0.293034 | 2.5     |
| ENSGALT0000 dehydrogenase/reductase (SDR fa     | DHRSX  | 0.931422 | 529.5   |
| ENSGALT0000 dehydrogenase E1 and transketola    | DHTKD1 | 0.9998   | 1354    |
| ENSGALT0000 DEAH (Asp-Glu-Ala-His) box polyp    | DHX15  | 0.925442 | 5137    |
| ENSGALT0000 DEAH (Asp-Glu-Ala-His) box polyp    | DHX29  | 0.952219 | 1164.5  |
| ENSGALT0000 DEAH (Asp-Glu-Ala-His) box polyp    | DHX30  | 0.897306 | 7780.75 |
| ENSGALT0000 DEAH (Asp-Glu-Ala-His) box polyp    | DHX32  | 0.900359 | 8       |
| ENSGALT0000 DEAH (Asp-Glu-Ala-His) box polyp    | DHX33  | 0.927774 | 1984.47 |
| ENSGALT0000 DEAH (Asp-Glu-Ala-His) box polyp    | DHX35  | 0.931681 | 275.5   |
| ENSGALT0000 DEAH (Asp-Glu-Ala-His) box polyp    | DHX36  | 0.8811   | 3448    |
| ENSGALT0000 DEAH (Asp-Glu-Ala-His) box polyp    | DHX37  | 0.942275 | 1071.5  |
| ENSGALT0000 DEAH (Asp-Glu-Ala-His) box polyp    | DHX38  | 0.945059 | 4373.13 |
| ENSGALT0000 DEAH (Asp-Glu-Ala-His) box polyp    | DHX40  | 0.962324 | 1275.5  |
| ENSGALT0000 DEAH (Asp-Glu-Ala-Asp/His) box p    | DHX57  | 0.968831 | 1236    |
| ENSGALT0000 DEXH (Asp-Glu-X-His) box polype     | DHX58  | 0.968494 | 44      |
| ENSGALT0000 DEAH (Asp-Glu-Ala-His) box polyp    | DHX8   | 0.944127 | 1279.66 |
| ENSGALT0000 diablo, IAP-binding mitochondrial p | DIABLO | 0.848574 | 919.5   |

|                                                                    |          |         |
|--------------------------------------------------------------------|----------|---------|
| ENSGALT0000 diaphanous homolog 1 (Drosophila DIAPH1                | 0.962072 | 829.998 |
| ENSGALT0000 diaphanous homolog 3 (Drosophila DIAPH3                | 0.973259 | 206.5   |
| ENSGALT0000 dicer 1, ribonuclease type III DICER1                  | 0.981092 | 2623.96 |
| ENSGALT0000 death inducer-obliterator 1 DIDO1                      | 0.970769 | 2557.7  |
| ENSGALT0000 digestive organ expansion factor hCDIEXF               | 0.956479 | 1095.5  |
| ENSGALT0000 DIM1 dimethyladenosine transferase DIMT1L              | 0.969922 | 212.5   |
| ENSGALT0000 deiodinase, iodothyronine, type II DIO2                | 0.800606 | 1326    |
| ENSGALT0000 deiodinase, iodothyronine, type III DIO3               | 0.69956  | 12.5    |
| ENSGALT0000 DIP2 disco-interacting protein 2 homolog DIP2A         | 0.976472 | 1818    |
| ENSGALT0000 DIP2 disco-interacting protein 2 homolog DIP2B         | 0.968562 | 2710    |
| ENSGALT0000 DIP2 disco-interacting protein 2 homolog DIP2C         | 0.929472 | 781     |
| ENSGALT0000 DIRAS family, GTP-binding RAS-like DIRAS2              | 0.569611 | 6       |
| ENSGALT0000 disrupted in renal carcinoma 2 DIRC2                   | 0.973981 | 1054    |
| ENSGALT0000 DIS3 mitotic control homolog (S. cerevisiae) DIS3      | 0.95614  | 1256    |
| ENSGALT0000 DIS3 mitotic control homolog (S. cerevisiae) DIS3L     | 0.972678 | 848.5   |
| ENSGALT0000 DIS3 mitotic control homolog (S. cerevisiae) DIS3L2    | 0.952416 | 1176    |
| ENSGALT0000 dispatched homolog 1 (Drosophila) DISP1                | 0.944757 | 689.5   |
| ENSGALT0000 DIX domain containing 1 DIXDC1                         | 0.720677 | 869     |
| ENSGALT0000 dyskeratosis congenita 1, dyskerin DKC1                | 0.927864 | 4739.5  |
| ENSGALT0000 Dkk-1 Uncharacterized protein DKK1                     | 0.410508 | 144.5   |
| ENSGALT0000 dickkopf homolog 2 (Xenopus laevis) DKK2               | 0.795983 | 150.5   |
| ENSGALT0000 dickkopf homolog 3 (Xenopus laevis) DKK3               | 0.956779 | 1775.5  |
| ENSGALT0000 dihydrolipoamide S-acetyltransferase DLAT              | 0.936025 | 1797.5  |
| ENSGALT0000 deleted in liver cancer 1 DLC1                         | 0.790545 | 556.5   |
| ENSGALT0000 dihydrolipoamide dehydrogenase DLD                     | 0.854568 | 3220.97 |
| ENSGALT0000 deleted in lung and esophageal carcinoma DLEC1         | 0.974666 | 149     |
| ENSGALT0000 deleted in lymphocytic leukemia, 7 DLEU7               | ?        | 0       |
| ENSGALT0000 discs, large homolog 1 (Drosophila) DLG1               | 0.983928 | 2004.5  |
| ENSGALT0000 discs, large homolog 2 (Drosophila) DLG2               | 0.664589 | 307.5   |
| ENSGALT0000 discs, large homolog 3 (Drosophila) DLG3               | 0.894557 | 1097    |
| ENSGALT0000 discs, large homolog 5 (Drosophila) DLG5               | 0.995926 | 2076.5  |
| ENSGALT0000 discs, large (Drosophila) homolog-epsilon DLGAP1       | 0.811969 | 64      |
| ENSGALT0000 discs, large (Drosophila) homolog-epsilon DLGAP2       | 0.963336 | 64      |
| ENSGALT0000 discs, large (Drosophila) homolog-epsilon DLGAP3       | 0.663502 | 225.5   |
| ENSGALT0000 discs, large (Drosophila) homolog-epsilon DLGAP4       | 0.896709 | 2137    |
| ENSGALT0000 discs, large (Drosophila) homolog-epsilon DLGAP5       | 0.922946 | 909.5   |
| ENSGALT0000 delta-like 1 homolog (Drosophila) DLK1                 | 0.666147 | 571.5   |
| ENSGALT0000 delta-like 2 homolog (Drosophila) DLK2                 | 0.786053 | 277     |
| ENSGALT0000 delta-like 1 (Drosophila) DLL1                         | 0.703738 | 1252.48 |
| ENSGALT0000 delta-like 4 (Drosophila) DLL4                         | 0.8013   | 70.5    |
| ENSGALT0000 dihydrolipoamide S-succinyltransferase DLST            | 0.780511 | 2842.99 |
| ENSGALT0000 distal-less homeobox 5 DLX5                            | 0.881482 | 964     |
| ENSGALT0000 distal-less homeobox 6 DLX6                            | 0.378013 | 80.3856 |
| ENSGALT0000 DNA methyltransferase 1 associated DMAP1               | 0.955373 | 403.5   |
| ENSGALT0000 diencephalon/mesencephalon homeobox DMBX1              | 0.580649 | 2.5     |
| ENSGALT0000 DMC1 dosage suppressor of mck1 DMC1                    | 0.884932 | 19      |
| ENSGALT0000 dystrophin DMD                                         | 0.987197 | 3756.97 |
| ENSGALT0000 dentin matrix acidic phosphoprotein DMP1               | 0.84591  | 4       |
| ENSGALT0000 doublesex and mab-3 related transcription factor DMRT1 | 0.191548 | 11      |
| ENSGALT0000 doublesex and mab-3 related transcription factor DMRT3 | 0.519298 | 10      |
| ENSGALT0000 DMRT-like family B with proline-rich DMRTB1            | 0.83584  | 5       |
| ENSGALT0000 cyclin D binding myb-like transcription factor DMTF1   | 0.981996 | 620.499 |
| ENSGALT0000 Dmx-like 1 DMXL1                                       | 0.989774 | 1373.5  |
| ENSGALT0000 Dmx-like 2 DMXL2                                       | 0.954376 | 1842.58 |
| ENSGALT0000 DNA replication helicase 2 homolog DNA2                | 0.935462 | 532.501 |
| ENSGALT0000 dynein, axonemal, assembly factor DNAAF1               | 0.981856 | 225     |

|                                                        |          |          |         |
|--------------------------------------------------------|----------|----------|---------|
| ENSGALT0000 dynein, axonemal, assembly factor          | DNAAF2   | 0.966624 | 131     |
| ENSGALT0000 dynein, axonemal, heavy chain 1            | DNAH1    | 0.993669 | 786     |
| ENSGALT0000 dynein, axonemal, heavy chain 10           | DNAH10   | 0.987323 | 494     |
| ENSGALT0000 dynein, axonemal, heavy chain 12           | DNAH12   | 0.99925  | 214.5   |
| ENSGALT0000 dynein, axonemal, heavy chain 17           | DNAH17   | 0.98751  | 365.928 |
| ENSGALT0000 dynein, axonemal, heavy chain 3            | DNAH3    | 0.989912 | 496     |
| ENSGALT0000 dynein, axonemal, heavy chain 5            | DNAH5    | 0.985576 | 360.5   |
| ENSGALT0000 dynein, axonemal, heavy chain 7            | DNAH7    | 0.977745 | 521.5   |
| ENSGALT0000 dynein, axonemal, heavy chain 8            | DNAH8    | 0.649519 | 0.5     |
| ENSGALT0000 dynein, axonemal, heavy chain 9            | DNAH9    | 0.95052  | 251     |
| ENSGALT0000 dynein, axonemal, intermediate chain       | DNAI1    | 0.954059 | 171.5   |
| ENSGALT0000 dynein, axonemal, intermediate chain       | DNAI2    | 0.999452 | 284     |
| ENSGALT0000 DnaJ (Hsp40) homolog, subfamily 1          | DNAJA1   | 0.856885 | 4241    |
| ENSGALT0000 DnaJ (Hsp40) homolog, subfamily 2          | DNAJA2   | 0.90665  | 3618.55 |
| ENSGALT0000 DnaJ (Hsp40) homolog, subfamily 3          | DNAJA3   | 0.872249 | 1332.5  |
| ENSGALT0000 DnaJ (Hsp40) homolog, subfamily 4          | DNAJA4   | 0.935517 | 1851    |
| ENSGALT0000 DnaJ (Hsp40) homolog, subfamily 11         | DNAJB11  | 0.846402 | 2733    |
| ENSGALT0000 DnaJ (Hsp40) homolog, subfamily 12         | DNAJB12  | 0.934756 | 952.483 |
| ENSGALT0000 DnaJ (Hsp40) homolog, subfamily 13         | DNAJB13  | 0.955567 | 142     |
| ENSGALT0000 DnaJ (Hsp40) homolog, subfamily 14         | DNAJB14  | 0.945335 | 1698    |
| ENSGALT0000 DnaJ (Hsp40) homolog, subfamily 4          | DNAJB4   | 0.961102 | 219     |
| ENSGALT0000 DnaJ (Hsp40) homolog, subfamily 5          | DNAJB5   | 0.880328 | 160.5   |
| ENSGALT0000 DnaJ (Hsp40) homolog, subfamily 6          | DNAJB6   | 0.884307 | 1531.5  |
| ENSGALT0000 DnaJ (Hsp40) homolog, subfamily 9          | DNAJB9   | 0.989232 | 294     |
| ENSGALT0000 DnaJ (Hsp40) homolog, subfamily 1          | DNAJC1   | 0.962044 | 1028    |
| ENSGALT0000 DnaJ (Hsp40) homolog, subfamily 10         | DNAJC10  | 0.97446  | 2335    |
| ENSGALT0000 DnaJ (Hsp40) homolog, subfamily 11         | DNAJC11  | 0.908251 | 1367.5  |
| ENSGALT0000 DnaJ (Hsp40) homolog, subfamily 12         | DNAJC12  | 0.993288 | 557     |
| ENSGALT0000 DnaJ (Hsp40) homolog, subfamily 13         | DNAJC13  | 0.935989 | 2217.5  |
| ENSGALT0000 DnaJ (Hsp40) homolog, subfamily 15         | DNAJC15  | 0.805207 | 360     |
| ENSGALT0000 DnaJ (Hsp40) homolog, subfamily 16         | DNAJC16  | 0.956813 | 1638.54 |
| ENSGALT0000 DnaJ (Hsp40) homolog, subfamily 17         | DNAJC17  | 0.735701 | 603.5   |
| ENSGALT0000 DnaJ (Hsp40) homolog, subfamily 18         | DNAJC18  | 0.737203 | 1219    |
| ENSGALT0000 DnaJ (Hsp40) homolog, subfamily 19         | DNAJC19  | 0.779992 | 269.766 |
| ENSGALT0000 DnaJ (Hsp40) homolog, subfamily 2          | DNAJC2   | 0.910294 | 993.5   |
| ENSGALT0000 DnaJ (Hsp40) homolog, subfamily 21         | DNAJC21  | 0.934992 | 411.5   |
| ENSGALT0000 DnaJ (Hsp40) homolog, subfamily 22         | DNAJC22  | 0.676435 | 7       |
| ENSGALT0000 DnaJ (Hsp40) homolog, subfamily 24         | DNAJC24  | 0.956725 | 400     |
| ENSGALT0000 DnaJ (Hsp40) homolog, subfamily 27         | DNAJC27  | 0.958284 | 750.5   |
| ENSGALT0000 DnaJ (Hsp40) homolog, subfamily 3          | DNAJC3   | 0.986507 | 5315.5  |
| ENSGALT0000 DnaJ (Hsp40) homolog, subfamily 30         | DNAJC30  | 0.60486  | 154     |
| ENSGALT0000 DnaJ (Hsp40) homolog, subfamily 5          | DNAJC5   | 0.912927 | 465.5   |
| ENSGALT0000 DnaJ (Hsp40) homolog, subfamily 5B         | DNAJC5B  | 0.750725 | 37      |
| ENSGALT0000 DnaJ (Hsp40) homolog, subfamily 6          | DNAJC6   | 0.697899 | 1073    |
| ENSGALT0000 DnaJ (Hsp40) homolog, subfamily 7          | DNAJC7   | 0.955678 | 4829.35 |
| ENSGALT0000 DnaJ (Hsp40) homolog, subfamily 8          | DNAJC8   | 0.863583 | 2219.5  |
| ENSGALT0000 DnaJ (Hsp40) homolog, subfamily 9          | DNAJC9   | 0.6319   | 1435.5  |
| ENSGALT0000 dynein, axonemal, light chain 1            | DNAL1    | 0.992558 | 66.5    |
| ENSGALT0000 dynein, axonemal, light chain 4            | DNAL4    | 0.923663 | 2221.5  |
| ENSGALT0000 dynein, axonemal, light intermediate chain | DNALI1   | 0.945437 | 394.5   |
| ENSGALT0000 deoxyribonuclease I                        | DNASE1   | 0.421875 | 2       |
| ENSGALT0000 deoxyribonuclease I-like 2                 | DNASE1L2 | 1        | 0.5     |
| ENSGALT0000 deoxyribonuclease I-like 3                 | DNASE1L3 | 0.659018 | 26      |
| ENSGALT0000 deoxyribonuclease II beta                  | DNASE2B  | 0.997929 | 276     |
| ENSGALT0000 dead end homolog 1 (zebrafish)             | DND1     | 0.545308 | 3.5     |
| ENSGALT0000 delta/notch-like EGF repeat containing     | DNER     | 0.94668  | 4444    |

|                                                                      |         |          |         |
|----------------------------------------------------------------------|---------|----------|---------|
| ENSGALT0000 DNL-type zinc finger                                     | DNLZ    | 0.284545 | 309.5   |
| ENSGALT0000 dynamin 1                                                | DNM1    | 0.785924 | 1332.49 |
| ENSGALT0000 dynamin 1-like                                           | DNM1L   | 0.931189 | 3591.92 |
| ENSGALT0000 dynamin binding protein                                  | DNMBP   | 0.998742 | 3253.99 |
| ENSGALT0000 DNA (cytosine-5-)-methyltransferase                      | DNMT3A  | 0.963768 | 8432.66 |
| ENSGALT0000 DNA (cytosine-5-)-methyltransferase                      | DNMT3B  | 0.965594 | 3463    |
| ENSGALT0000 aspartyl aminopeptidase                                  | DNPEP   | 0.738823 | 3457    |
| ENSGALT0000 deoxynucleotidyltransferase, termir                      | DNTT    | 0.649519 | 2.5     |
| ENSGALT0000 deoxynucleotidyltransferase, termir                      | DNTTIP1 | 0.719634 | 1388.5  |
| ENSGALT0000 deoxynucleotidyltransferase, termir                      | DNTTIP2 | 0.939343 | 728     |
| ENSGALT0000 double C2-like domains, beta                             | DOC2B   | 0.904899 | 293     |
| ENSGALT0000 dedicator of cytokinesis 1                               | DOCK1   | 0.987971 | 3694.34 |
| ENSGALT0000 dedicator of cytokinesis 10                              | DOCK10  | 0.800157 | 255     |
| ENSGALT0000 dedicator of cytokinesis 11                              | DOCK11  | 0.803707 | 840.5   |
| ENSGALT0000 dedicator of cytokinesis 2                               | DOCK2   | 0.932918 | 15.5    |
| ENSGALT0000 dedicator of cytokinesis 3                               | DOCK3   | 0.924204 | 1986    |
| ENSGALT0000 dedicator of cytokinesis 4                               | DOCK4   | 0.888174 | 339     |
| ENSGALT0000 dedicator of cytokinesis 5                               | DOCK5   | 0.996989 | 763.498 |
| ENSGALT0000 dedicator of cytokinesis 7                               | DOCK7   | 0.938959 | 6523.84 |
| ENSGALT0000 dedicator of cytokinesis 8                               | DOCK8   | 0.680229 | 87.0001 |
| ENSGALT0000 dedicator of cytokinesis 9                               | DOCK9   | 0.992718 | 1208.5  |
| ENSGALT0000 Deoxyhypusine hydroxylase                                | DOHH    | 0.48425  | 665     |
| ENSGALT0000 docking protein 4                                        | DOK4    | 0.731296 | 1130    |
| ENSGALT0000 docking protein 5                                        | DOK5    | 0.643449 | 478.5   |
| ENSGALT0000 docking protein 6                                        | DOK6    | 0.907239 | 93.5    |
| ENSGALT0000 docking protein 7                                        | DOK7    | 0.987299 | 142     |
| ENSGALT0000 dolichol kinase                                          | DOLK    | 0.936387 | 260.5   |
| ENSGALT0000 dolichyl pyrophosphate phosphatase                       | DOLPP1  | 0.909125 | 701     |
| ENSGALT0000 downstream neighbor of SON                               | DONSON  | 0.945251 | 436     |
| ENSGALT0000 dopey family member 1                                    | DOPEY1  | 0.951937 | 966     |
| ENSGALT0000 dopey family member 2                                    | DOPEY2  | 0.990247 | 1367    |
| ENSGALT0000 DOT1-like, histone H3 methyltransferase                  | DOT1L   | 0.978435 | 1721.68 |
| ENSGALT0000 dolichyl-phosphate (UDP-N-acetylglucosamine) transferase | DPAGT1  | 0.965769 | 2578.5  |
| ENSGALT0000 deleted in primary ciliary dyskinesia 2                  | DPCD    | 0.825963 | 1452.5  |
| ENSGALT0000 dipeptidase 1 (renal)                                    | DPEP1   | 0.438355 | 14      |
| ENSGALT0000 dipeptidase 2                                            | DPEP2   | 0.895318 | 3       |
| ENSGALT0000 D4, zinc and double PHD fingers family member 2          | DPF2    | 0.886531 | 1047.5  |
| ENSGALT0000 D4, zinc and double PHD fingers, family member 3         | DPF3    | 0.72858  | 82.5    |
| ENSGALT0000 DPH1 homolog (S. cerevisiae)                             | DPH1    | 0.940978 | 648     |
| ENSGALT0000 DPH2 homolog (S. cerevisiae)                             | DPH2    | 0.699678 | 604.5   |
| ENSGALT0000 DPH3, KTI11 homolog (S. cerevisiae)                      | DPH3    | 0.851412 | 321.5   |
| ENSGALT0000 DPH5 homolog (S. cerevisiae)                             | DPH5    | 0.798267 | 643.5   |
| ENSGALT0000 dolichyl-phosphate mannosyltransferase 1                 | DPM1    | 0.900838 | 425.5   |
| ENSGALT0000 dolichyl-phosphate mannosyltransferase 2                 | DPM2    | 0.70464  | 1313    |
| ENSGALT0000 dipeptidyl-peptidase 10 (non-functional)                 | DPP10   | 0.814323 | 1169    |
| ENSGALT0000 dipeptidyl-peptidase 4                                   | DPP4    | 0.918819 | 100.5   |
| ENSGALT0000 dipeptidyl-peptidase 6                                   | DPP6    | 0.998841 | 371.5   |
| ENSGALT0000 dipeptidyl-peptidase 7                                   | DPP7    | 0.951732 | 2506.5  |
| ENSGALT0000 dipeptidyl-peptidase 8                                   | DPP8    | 0.950147 | 736     |
| ENSGALT0000 dipeptidyl-peptidase 9                                   | DPP9    | 0.957422 | 1216.5  |
| ENSGALT0000 dermatopontin                                            | DPT     | 0.603682 | 1       |
| ENSGALT0000 dpy-19-like 1 (C. elegans)                               | DPY19L1 | 0.986333 | 1444.5  |
| ENSGALT0000 dpy-19-like 3 (C. elegans)                               | DPY19L3 | 0.976987 | 596     |
| ENSGALT0000 dpy-19-like 4 (C. elegans)                               | DPY19L4 | 0.98912  | 1184.5  |
| ENSGALT0000 dpy-30 homolog (C. elegans)                              | DPY30   | 0.73949  | 717.5   |
| ENSGALT0000 dihydropyrimidine dehydrogenase                          | DPYD    | 0.792517 | 422     |

|                                                       |        |          |         |
|-------------------------------------------------------|--------|----------|---------|
| ENSGALT0000 dihydropyrimidinase                       | DPYS   | 0.44595  | 16      |
| ENSGALT0000 dihydropyrimidinase-like 2                | DPYSL2 | 0.759679 | 11876.2 |
| ENSGALT0000 dihydropyrimidinase-like 3                | DPYSL3 | 0.597363 | 13084.2 |
| ENSGALT0000 dihydropyrimidinase-like 4                | DPYSL4 | 0.489908 | 2324.01 |
| ENSGALT0000 down-regulator of transcription 1, T DR1  |        | 0.893185 | 1733.5  |
| ENSGALT0000 DNA-damage regulated autophagy DRAM1      |        | 0.943934 | 3       |
| ENSGALT0000 DNA-damage regulated autophagy DRAM2      |        | 0.982719 | 423.5   |
| ENSGALT0000 dopamine receptor D1                      | DRD1   | 0.754412 | 4.5     |
| ENSGALT0000 dopamine receptor D2                      | DRD2   | 0.978063 | 4.5     |
| ENSGALT0000 developmentally regulated GTP binDRG1     |        | 0.581844 | 1631.01 |
| ENSGALT0000 developmentally regulated GTP binDRG2     |        | 0.877982 | 1500    |
| ENSGALT0000 dorsal root ganglia homeobox              | DRGX   | 0.599323 | 1.5     |
| ENSGALT0000 drosha, ribonuclease type III             | DROSHA | 0.947307 | 1214    |
| ENSGALT0000 dystrophin related protein 2              | DRP2   | 0.674865 | 278.5   |
| ENSGALT0000 desmocollin 2                             | DSC2   | 0.739802 | 187.5   |
| ENSGALT0000 Down syndrome cell adhesion moleDSCAM     |        | 0.895524 | 233     |
| ENSGALT0000 Down syndrome cell adhesion moleDSCAML1   |        | 0.654318 | 121     |
| ENSGALT0000 defective in sister chromatid cohesiDSCC1 |        | 0.755669 | 523.5   |
| ENSGALT0000 Down syndrome critical region genDSCR3    |        | 0.911993 | 943     |
| ENSGALT0000 Down syndrome critical region genDSCR6    |        | ?        | 0       |
| ENSGALT0000 dermatan sulfate epimerase                | DSE    | 0.986384 | 959     |
| ENSGALT0000 dermatan sulfate epimerase-like           | DSEL   | 0.955383 | 652     |
| ENSGALT0000 desmoglein 2                              | DSG2   | 0.878919 | 3962    |
| ENSGALT0000 DSN1, MIND kinetochore complex            | DSN1   | 0.933138 | 1088    |
| ENSGALT0000 desmoplakin                               | DSP    | 0.953148 | 1662    |
| ENSGALT0000 dystonin                                  | DST    | 0.897543 | 5773.97 |
| ENSGALT0000 destrin (actin depolymerizing factor      | DSTN   | 0.888452 | 20476   |
| ENSGALT0000 dual serine/threonine and tyrosine  DSTYK |        | 0.989118 | 1035    |
| ENSGALT0000 D-tyrosyl-tRNA deacylase 1 homokDTD1      |        | 0.900987 | 958     |
| ENSGALT0000 death domain containing 1                 | DTHD1  | 0.464758 | 0       |
| ENSGALT0000 denticleless homolog (Drosophila)         | DTL    | 0.88362  | 463     |
| ENSGALT0000 dystrobrevin, alpha                       | DTNA   | 0.97545  | 1695.5  |
| ENSGALT0000 hypothetical protein LOC421992            | DTNB   | 0.908028 | 336.001 |
| ENSGALT0000 dystrobrevin binding protein 1            | DTNBP1 | 0.782624 | 876.501 |
| ENSGALT0000 DTW domain containing 1                   | DTWD1  | 0.998844 | 235     |
| ENSGALT0000 DTW domain containing 2                   | DTWD2  | 0.937992 | 212     |
| ENSGALT0000 deltex homolog 2 (Drosophila)             | DTX2   | 0.965041 | 755.5   |
| ENSGALT0000 deltex 3-like (Drosophila)                | DTX3L  | 0.989728 | 102     |
| ENSGALT0000 deltex homolog 4 (Drosophila)             | DTX4   | 0.871433 | 3978    |
| ENSGALT0000 deoxythymidylate kinase (thymidylkDTYMK   |        | 0.615035 | 1493.51 |
| ENSGALT0000 dual oxidase 2                            | DUOX2  | 0.928231 | 7.5     |
| ENSGALT0000 dual oxidase maturation factor 1          | DUOXA1 | 0.862425 | 2.5     |
| ENSGALT0000 dual specificity phosphatase and piDUPD1  |        | 0.534404 | 1       |
| ENSGALT0000 dihydrouridine synthase 1-like (S. cDUS1L |        | 0.89346  | 818.004 |
| ENSGALT0000 dihydrouridine synthase 2-like, SMIDUS2L  |        | 0.975075 | 540.5   |
| ENSGALT0000 dihydrouridine synthase 3-like (S. cDUS3L |        | 0.889195 | 666     |
| ENSGALT0000 dihydrouridine synthase 4-like (S. cDUS4L |        | 0.842324 | 228     |
| ENSGALT0000 dual specificity phosphatase 1            | DUSP1  | 0.812925 | 377.356 |
| ENSGALT0000 dual specificity phosphatase 10           | DUSP10 | 0.815685 | 255     |
| ENSGALT0000 dual specificity phosphatase 11 (RM       | DUSP11 | 0.981523 | 149.5   |
| ENSGALT0000 dual specificity phosphatase 12           | DUSP12 | 0.821424 | 588.5   |
| ENSGALT0000 dual specificity phosphatase 13           | DUSP13 | 0.853815 | 0.5     |
| ENSGALT0000 dual specificity phosphatase 14           | DUSP14 | 0.999588 | 913.5   |
| ENSGALT0000 dual specificity phosphatase 15           | DUSP15 | 0.920316 | 230     |
| ENSGALT0000 dual specificity phosphatase 16           | DUSP16 | 0.992092 | 460.5   |
| ENSGALT0000 dual specificity phosphatase 18           | DUSP18 | 0.858323 | 77      |



|                                                             |              |           |         |
|-------------------------------------------------------------|--------------|-----------|---------|
| ENSGALT0000 dual specificity phosphatase 19                 | DUSP19       | 0.903017  | 739.5   |
| ENSGALT0000 dual specificity phosphatase 22                 | DUSP22       | 0.923431  | 1217    |
| ENSGALT0000 dual specificity phosphatase 26 (putative)      | DUSP26       | 0.305671  | 116.5   |
| ENSGALT0000 dual specificity phosphatase 27 (putative)      | DUSP27       | 0.966946  | 16      |
| ENSGALT0000 dual specificity phosphatase 28                 | DUSP28       | 0.525697  | 20      |
| ENSGALT0000 dual specificity phosphatase 3                  | DUSP3        | 0.941965  | 262     |
| ENSGALT0000 mitogen-activated protein kinase phosphatase 4  | DUSP4        | 0.906372  | 351.646 |
| ENSGALT0000 dual specificity phosphatase 5                  | DUSP5        | 0.769192  | 100.5   |
| ENSGALT0000 dual specificity phosphatase 6                  | DUSP6        | 0.728107  | 1106    |
| ENSGALT0000 dual specificity phosphatase 7                  | DUSP7        | 0.90435   | 344.5   |
| ENSGALT0000 dual specificity phosphatase 8                  | DUSP8        | 0.803802  | 951.5   |
| ENSGALT0000 deoxyuridine triphosphatase                     | DUT          | 0.93958   | 2288.49 |
| ENSGALT0000 dishevelled, dsh homolog 1 (Drosophila)         | DVL1         | 0.952029  | 2090.98 |
| ENSGALT0000 dishevelled, dsh homolog 3 (Drosophila)         | DVL3         | 0.847216  | 3220    |
| ENSGALT0000 DPY30 domain containing 1                       | DYDC1        | 0.772973  | 2.5     |
| ENSGALT0000 dymeclin                                        | DYM          | 0.946962  | 903.003 |
| ENSGALT0000 dynein, cytoplasmic 1, heavy chain              | DYNC1H1      | 0.944833  | 33697.1 |
| ENSGALT0000 dynein, cytoplasmic 1, intermediate chain       | DYNC1I1      | 0.605696  | 1692.5  |
| ENSGALT0000 dynein, cytoplasmic 1, intermediate chain       | DYNC1I2      | 0.913638  | 3884.88 |
| ENSGALT0000 dynein, cytoplasmic 1, light intermediate chain | DYNC1LI1     | 0.862037  | 2138    |
| ENSGALT0000 dynein, cytoplasmic 1, light intermediate chain | DYNC1LI2     | 0.907945  | 1285.81 |
| ENSGALT0000 dynein, cytoplasmic 2, heavy chain              | DYNC2H1      | 0.998281  | 2140    |
| ENSGALT0000 dynein, cytoplasmic 2, light intermediate chain | DYNC2LI1     | 0.973561  | 397.5   |
| ENSGALT0000 dynein, light chain, LC8-type 1                 | DYNLL1       | 0.118363  | 55.5    |
| ENSGALT0000 dynein, light chain, LC8-type 2                 | DYNLL2       | 0.682408  | 1987    |
| ENSGALT0000 dynein, light chain, roadblock-type             | DYNLRB1      | 0.892682  | 2108.5  |
| ENSGALT0000 dynein, light chain, roadblock-type             | DYNLRB2      | 0.98027   | 71.5    |
| ENSGALT0000 dynein, light chain, Tctex-type 1               | DYNLT1       | 0.408789  | 1353    |
| ENSGALT0000 dynein, light chain, Tctex-type 3               | DYNLT3       | 0.978675  | 164.5   |
| ENSGALT0000 dual-specificity tyrosine-(Y)-phosphatase 1A    | DYRK1A       | 0.982779  | 936     |
| ENSGALT0000 dual-specificity tyrosine-(Y)-phosphatase 2     | DYRK2        | 0.992675  | 593.5   |
| ENSGALT0000 dual-specificity tyrosine-(Y)-phosphatase 3     | DYRK3        | 0.996421  | 893     |
| ENSGALT0000 dysferlin, limb girdle muscular dystrophy 29    | DYSF         | 0.929708  | 688.502 |
| ENSGALT0000 dysferlin interacting protein 1                 | DYSFIP1      | 0.921631  | 9       |
| ENSGALT0000 dyslexia susceptibility 1 candidate 1           | DYX1C1       | 0.963967  | 206     |
| ENSGALT0000 double zinc ribbon and ankyrin repeat domain 1  | DZANK1       | 0.993493  | 257     |
| ENSGALT0000 DAZ interacting protein 1                       | DZIP1        | 0.999366  | 545.495 |
| ENSGALT0000 DAZ interacting protein 1-like                  | DZIP1L       | 0.907006  | 20      |
| ENSGALT0000 Uncharacterized protein                         | E1AP57_CHICK | 0.895136  | 6       |
| ENSGALT0000 Uncharacterized protein                         | E1BQH3_CHICK | 0.969174  | 493     |
| ENSGALT0000 Uncharacterized protein                         | E1BQH4_CHICK | 0.818488  | 0.5     |
| ENSGALT0000 Uncharacterized protein                         | E1BQJ6_CHICK | 0.919857  | 852.5   |
| ENSGALT0000 Uncharacterized protein                         | E1BQL4_CHICK | 0.752655  | 7.5     |
| ENSGALT0000 Uncharacterized protein                         | E1BQM6_CHICK | ?         | 0       |
| ENSGALT0000 Gap junction protein                            | E1BQP7_CHICK | 0.882246  | 90      |
| ENSGALT0000 Transporter                                     | E1BQT4_CHICK | 0.992268  | 17      |
| ENSGALT0000 Uncharacterized protein                         | E1BQU9_CHICK | 0.881285  | 2142.5  |
| ENSGALT0000 Uncharacterized protein                         | E1BR36_CHICK | 0.924816  | 2269.51 |
| ENSGALT0000 Uncharacterized protein                         | E1BR72_CHICK | 0.964327  | 520.5   |
| ENSGALT0000 Uncharacterized protein                         | E1BRX3_CHICK | 0.0503556 | 0       |
| ENSGALT0000 Gap junction protein                            | E1BRZ1_CHICK | 0.796599  | 1416.98 |
| ENSGALT0000 Uncharacterized protein                         | E1BRZ3_CHICK | 0.997834  | 228     |
| ENSGALT0000 Uncharacterized protein                         | E1BRZ4_CHICK | 0.464758  | 0       |
| ENSGALT0000 Uncharacterized protein                         | E1BS07_CHICK | 0.142427  | 0       |
| ENSGALT0000 Uncharacterized protein                         | E1BS81_CHICK | 0.89922   | 354     |
| ENSGALT0000 Uncharacterized protein                         | E1BSM5_CHICK | 0.98024   | 802     |

|                                                     |              |           |         |
|-----------------------------------------------------|--------------|-----------|---------|
| ENSGALT0000 Uncharacterized protein                 | E1BSV1_CHICK | 0.985338  | 40.5    |
| ENSGALT0000 Uncharacterized protein                 | E1BSX0_CHICK | 0.717929  | 11      |
| ENSGALT0000 Uncharacterized protein                 | E1BTK4_CHICK | 0.876691  | 14      |
| ENSGALT0000 Uncharacterized protein                 | E1BTQ0_CHICK | 0.967054  | 1155    |
| ENSGALT0000 Uncharacterized protein                 | E1BTX8_CHICK | 0.962215  | 3671    |
| ENSGALT0000 Serine/threonine-protein phosphatase    | E1BTX9_CHICK | 0.965358  | 37      |
| ENSGALT0000 Uncharacterized protein                 | E1BUA5_CHICK | 0.949192  | 4.5     |
| ENSGALT0000 Uncharacterized protein                 | E1BUB0_CHICK | 0.925217  | 3837.12 |
| ENSGALT0000 Uncharacterized protein                 | E1BUI1_CHICK | 0.829248  | 32.5    |
| ENSGALT0000 Uncharacterized protein                 | E1BUQ1_CHICK | 0.783178  | 2       |
| ENSGALT0000 Uncharacterized protein                 | E1BV19_CHICK | 0.973215  | 12      |
| ENSGALT0000 Uncharacterized protein                 | E1BVC9_CHICK | ?         | 0       |
| ENSGALT0000 Uncharacterized protein                 | E1BVF5_CHICK | 0.928697  | 537     |
| ENSGALT0000 Uncharacterized protein                 | E1BVR7_CHICK | 0.841456  | 3461    |
| ENSGALT0000 Uncharacterized protein                 | E1BVY3_CHICK | 0.622055  | 6       |
| ENSGALT0000 Uncharacterized protein                 | E1BW57_CHICK | 0.992345  | 151.745 |
| ENSGALT0000 Uncharacterized protein                 | E1BW80_CHICK | 0.98855   | 13      |
| ENSGALT0000 Potassium voltage-gated channel subunit | E1BWC7_CHICK | 0.880776  | 6.5     |
| ENSGALT0000 Uncharacterized protein                 | E1BWJ9_CHICK | 0.999864  | 918.5   |
| ENSGALT0000 Uncharacterized protein                 | E1BWP2_CHICK | 0.730382  | 21.5    |
| ENSGALT0000 Uncharacterized protein                 | E1BWY5_CHICK | 0.771232  | 11.5    |
| ENSGALT0000 Uncharacterized protein                 | E1BX41_CHICK | 0.956019  | 468.5   |
| ENSGALT0000 Uncharacterized protein                 | E1BX72_CHICK | 0.559737  | 7.5     |
| ENSGALT0000 Uncharacterized protein                 | E1BX90_CHICK | 0.909701  | 505.5   |
| ENSGALT0000 Uncharacterized protein                 | E1BXF2_CHICK | 0.800996  | 156.584 |
| ENSGALT0000 Uncharacterized protein                 | E1BXM0_CHICK | 0.908343  | 42      |
| ENSGALT0000 Uncharacterized protein                 | E1BXV5_CHICK | 0.790502  | 14.3463 |
| ENSGALT0000 Uncharacterized protein                 | E1BY32_CHICK | 0.780657  | 2.5     |
| ENSGALT0000 Uncharacterized protein                 | E1BY69_CHICK | 0.624337  | 453     |
| ENSGALT0000 Uncharacterized protein                 | E1BYP1_CHICK | 0.971822  | 1581.03 |
| ENSGALT0000 Uncharacterized protein                 | E1BZ58_CHICK | 0.854832  | 70.5    |
| ENSGALT0000 Uncharacterized protein                 | E1BZ79_CHICK | 0.782052  | 2386.5  |
| ENSGALT0000 Uncharacterized protein                 | E1BZ84_CHICK | 0.867112  | 44.5    |
| ENSGALT0000 Uncharacterized protein                 | E1BZE8_CHICK | 0.497671  | 120.5   |
| ENSGALT0000 Uncharacterized protein                 | E1BZG4_CHICK | 0.92393   | 23181.5 |
| ENSGALT0000 Uncharacterized protein                 | E1BZP0_CHICK | 0.930865  | 766.543 |
| ENSGALT0000 Uncharacterized protein                 | E1BZP4_CHICK | 0.867162  | 4.5     |
| ENSGALT0000 Gap junction protein                    | E1BZR3_CHICK | 0.464758  | 0       |
| ENSGALT0000 Uncharacterized protein                 | E1BZR5_CHICK | 0.950799  | 981     |
| ENSGALT0000 Uncharacterized protein                 | E1BZY5_CHICK | 0.936576  | 168     |
| ENSGALT0000 Uncharacterized protein                 | E1BZZ9_CHICK | 0.316534  | 336.579 |
| ENSGALT0000 Ribosomal protein S27                   | E1C075_CHICK | 0.643968  | 14671   |
| ENSGALT0000 Uncharacterized protein                 | E1C0A1_CHICK | ?         | 0       |
| ENSGALT0000 Uncharacterized protein                 | E1C0B4_CHICK | 0.649519  | 3       |
| ENSGALT0000 Uncharacterized protein                 | E1C0F9_CHICK | ?         | 0       |
| ENSGALT0000 Uncharacterized protein                 | E1C0U5_CHICK | 0.467819  | 4.5     |
| ENSGALT0000 Uncharacterized protein                 | E1C105_CHICK | 0.930721  | 40.5    |
| ENSGALT0000 Uncharacterized protein                 | E1C120_CHICK | 0.802638  | 272     |
| ENSGALT0000 Uncharacterized protein                 | E1C162_CHICK | 0.0478539 | 2.97926 |
| ENSGALT0000 Uncharacterized protein                 | E1C182_CHICK | 0.990287  | 655.5   |
| ENSGALT0000 Uncharacterized protein                 | E1C1F8_CHICK | 0.978806  | 328     |
| ENSGALT0000 hypothetical protein LOC429283          | E1C1N2_CHICK | 0.501673  | 51.1144 |
| ENSGALT0000 Uncharacterized protein                 | E1C202_CHICK | 0.496193  | 827.5   |
| ENSGALT0000 Uncharacterized protein                 | E1C2D6_CHICK | 0.551968  | 1142.99 |
| ENSGALT0000 Gap junction protein                    | E1C2J9_CHICK | 0.998646  | 824.958 |
| ENSGALT0000 Uncharacterized protein                 | E1C2K1_CHICK | 0.667377  | 31.5    |

|                                                               |              |           |         |
|---------------------------------------------------------------|--------------|-----------|---------|
| ENSGALT0000 Uncharacterized protein                           | E1C2N1_CHICK | 0.904287  | 1122    |
| ENSGALT0000 Uncharacterized protein                           | E1C379_CHICK | 0.917835  | 2       |
| ENSGALT0000 Uncharacterized protein                           | E1C3D1_CHICK | 0.769075  | 353.5   |
| ENSGALT0000 Uncharacterized protein                           | E1C3P8_CHICK | 0.951408  | 320     |
| ENSGALT0000 Uncharacterized protein                           | E1C3T9_CHICK | 0.730178  | 11.5137 |
| ENSGALT0000 Uncharacterized protein                           | E1C472_CHICK | 0.997194  | 399     |
| ENSGALT0000 Uncharacterized protein                           | E1C4B7_CHICK | 0.59011   | 2       |
| ENSGALT0000 Uncharacterized protein                           | E1C4G2_CHICK | 0.988525  | 1610.5  |
| ENSGALT0000 Uncharacterized protein                           | E1C4J3_CHICK | 0.39733   | 3       |
| ENSGALT0000 Uncharacterized protein                           | E1C4L1_CHICK | 0.912779  | 147     |
| ENSGALT0000 Uncharacterized protein                           | E1C4Q6_CHICK | 0.0602016 | 321.12  |
| ENSGALT0000 Uncharacterized protein                           | E1C4R3_CHICK | 0.721726  | 238.167 |
| ENSGALT0000 Potassium voltage-gated channel subunit           | E1C564_CHICK | 0.485881  | 10      |
| ENSGALT0000 Uncharacterized protein                           | E1C5F0_CHICK | 0.898356  | 2       |
| ENSGALT0000 Uncharacterized protein                           | E1C5Q0_CHICK | 0.994576  | 56      |
| ENSGALT0000 Uncharacterized protein                           | E1C5R5_CHICK | 0.973597  | 256     |
| ENSGALT0000 Metallothionein                                   | E1C5U7_CHICK | 0.201893  | 85      |
| ENSGALT0000 Uncharacterized protein                           | E1C5X9_CHICK | 0.652372  | 1510    |
| ENSGALT0000 Uncharacterized protein                           | E1C5Y2_CHICK | 0.675555  | 17.3914 |
| ENSGALT0000 Uncharacterized protein                           | E1C639_CHICK | 0.898356  | 1       |
| ENSGALT0000 Uncharacterized protein                           | E1C693_CHICK | 0.787185  | 12.5    |
| ENSGALT0000 Uncharacterized protein                           | E1C6C8_CHICK | 0.424571  | 3.5     |
| ENSGALT0000 DNA-directed RNA polymerase subunit               | E1C6D4_CHICK | 0.50461   | 877     |
| ENSGALT0000 Uncharacterized protein                           | E1C6D8_CHICK | 0.963913  | 227.5   |
| ENSGALT0000 Uncharacterized protein                           | E1C6E9_CHICK | 0.740073  | 0.5     |
| ENSGALT0000 Uncharacterized protein                           | E1C6K1_CHICK | 0.979798  | 3.5     |
| ENSGALT0000 Malic enzyme                                      | E1C740_CHICK | 0.840261  | 1215    |
| ENSGALT0000 Uncharacterized protein                           | E1C744_CHICK | 0.825324  | 329     |
| ENSGALT0000 Uncharacterized protein                           | E1C779_CHICK | 0.848255  | 19      |
| ENSGALT0000 DNA-directed RNA polymerase                       | E1C7P0_CHICK | 0.910678  | 106.5   |
| ENSGALT0000 Gap junction protein                              | E1C7P9_CHICK | 0.927729  | 1       |
| ENSGALT0000 Uncharacterized protein                           | E1C7Q7_CHICK | 0.842052  | 77      |
| ENSGALT0000 Uncharacterized protein                           | E1C7Z8_CHICK | 0.987834  | 54      |
| ENSGALT0000 Uncharacterized protein                           | E1C8A0_CHICK | 0.874236  | 135     |
| ENSGALT0000 Uncharacterized protein                           | E1C8F2_CHICK | 0.984273  | 4.5     |
| ENSGALT0000 Uncharacterized protein                           | E1C8I0_CHICK | 0.562993  | 1.5     |
| ENSGALT0000 Transporter                                       | E1C8K0_CHICK | 0.661268  | 159     |
| ENSGALT0000 Uncharacterized protein                           | E1C8X7_CHICK | 0.982594  | 5052.75 |
| ENSGALT0000 Uncharacterized protein                           | E1C8X8_CHICK | 0.69334   | 8.07526 |
| ENSGALT0000 Uncharacterized protein                           | E1C8Z8_CHICK | 0.778337  | 1529.5  |
| ENSGALT0000 Integrin beta                                     | E1C9G7_CHICK | 0.628851  | 617.5   |
| ENSGALT0000 Uncharacterized protein                           | E1C9K4_CHICK | 0.472763  | 0       |
| ENSGALT0000 E2F transcription factor 1                        | E2F1         | 0.926695  | 335     |
| ENSGALT0000 E2F transcription factor 3                        | E2F3         | 0.973262  | 265.5   |
| ENSGALT0000 transcription factor E2F4                         | E2F4         | 0.827755  | 2768.27 |
| ENSGALT0000 E2F transcription factor 5, p130-binding protein  | E2F5         | 0.992482  | 671.213 |
| ENSGALT0000 E2F transcription factor 6                        | E2F6         | 0.907881  | 665.999 |
| ENSGALT0000 E2F transcription factor 7                        | E2F7         | 0.888942  | 447.5   |
| ENSGALT0000 E2F transcription factor 8                        | E2F8         | 0.961085  | 488     |
| ENSGALT0000 Uncharacterized protein                           | E2GHT0_CHICK | 0.482185  | 1       |
| ENSGALT0000 E4F transcription factor 1                        | E4F1         | 0.945283  | 889.5   |
| ENSGALT0000 ELL associated factor 1                           | EAF1         | 0.878726  | 175.5   |
| ENSGALT0000 ELL associated factor 2                           | EAF2         | 0.948366  | 263.484 |
| ENSGALT0000 E2F-associated phosphoprotein                     | EAPP         | 0.914046  | 708.5   |
| ENSGALT0000 glutamyl-tRNA synthetase 2, mitochondrial         | EARS2        | 0.848042  | 442.5   |
| ENSGALT0000 estrogen receptor binding site associated protein | EBAG9        | 0.911787  | 773.503 |

|             |                                        |          |          |         |
|-------------|----------------------------------------|----------|----------|---------|
| ENSGALT0000 | early B-cell factor 1                  | EBF1     | 0.803934 | 1211.51 |
| ENSGALT0000 | early B-cell factor 2                  | EBF2     | 0.567177 | 50      |
| ENSGALT0000 | early B-cell factor 3                  | EBF3     | 0.91391  | 367     |
| ENSGALT0000 | EBNA1 binding protein 2                | EBNA1BP2 | 0.854142 | 1818    |
| ENSGALT0000 | ecdysoneless homolog (Drosophila)      | ECD      | 0.923805 | 883.5   |
| ENSGALT0000 | endothelin converting enzyme 2         | ECE2     | 0.70666  | 78.5    |
| ENSGALT0000 | endothelin converting enzyme-like      | ECEL1    | 0.681622 | 54      |
| ENSGALT0000 | enoyl CoA hydratase domain conta       | ECHDC1   | 0.961995 | 136     |
| ENSGALT0000 | enoyl CoA hydratase domain conta       | ECHDC2   | 0.879252 | 475.5   |
| ENSGALT0000 | enoyl CoA hydratase domain conta       | ECHDC3   | 0.940029 | 720     |
| ENSGALT0000 | enoyl-CoA delta isomerase 1            | ECI1     | 0.818258 | 2353.01 |
| ENSGALT0000 | enoyl-CoA delta isomerase 2            | ECI2     | 0.967465 | 747     |
| ENSGALT0000 | extracellular matrix protein 2, femal  | ECM2     | 0.990608 | 171.5   |
| ENSGALT0000 | epithelial cell transforming sequenc   | ECT2     | 0.935398 | 707.5   |
| ENSGALT0000 | ectodysplasin A                        | EDA      | 0.953822 | 269     |
| ENSGALT0000 | ectodysplasin A2 receptor              | EDA2R    | 0.986368 | 100     |
| ENSGALT0000 | ectodysplasin A receptor               | EDAR     | 0.440513 | 2.5     |
| ENSGALT0000 | EDAR-associated death domain           | EDARADD  | 0.986115 | 423.5   |
| ENSGALT0000 | enhancer of mRNA decapping 3 ho        | EDC3     | 0.983285 | 1465    |
| ENSGALT0000 | enhancer of mRNA decapping 4           | EDC4     | 0.927258 | 3646.5  |
| ENSGALT0000 | ER degradation enhancer, mannos        | EDEM1    | 0.990811 | 627.5   |
| ENSGALT0000 | ER degradation enhancer, mannos        | EDEM2    | 0.989552 | 1006    |
| ENSGALT0000 | ER degradation enhancer, mannos        | EDEM3    | 0.979441 | 861.5   |
| ENSGALT0000 | endothelial differentiation-related fa | EDF1     | 0.543765 | 4301.5  |
| ENSGALT0000 | EGF-like repeats and discoidin I-lik   | EDIL3    | 0.861622 | 665     |
| ENSGALT0000 | endothelin 1                           | EDN1     | 0.942317 | 11      |
| ENSGALT0000 | endothelin 2                           | EDN2     | 0.525311 | 9       |
| ENSGALT0000 | endothelin 3                           | EDN3     | 0.968834 | 61      |
| ENSGALT0000 | endothelin receptor type A             | EDNRA    | 0.833536 | 687     |
| ENSGALT0000 | endothelin receptor type B             | EDNRB    | 0.585442 | 841     |
| ENSGALT0000 | endothelin receptor B subtype 2        | EDNRB2   | 0.731137 | 185.5   |
| ENSGALT0000 | early endosome antigen 1               | EEA1     | 0.966365 | 896     |
| ENSGALT0000 | embryonic ectoderm development         | EED      | 0.965547 | 516.998 |
| ENSGALT0000 | eukaryotic translation elongation fa   | EEF1A1   | 0.776827 | 307220  |
| ENSGALT0000 | eukaryotic translation elongation fa   | EEF1A2   | 0.625392 | 13320.6 |
| ENSGALT0000 | eukaryotic translation elongation fa   | EEF1B2   | 0.860069 | 18777.5 |
| ENSGALT0000 | eukaryotic translation elongation fa   | EEF1E1   | 0.939496 | 927     |
| ENSGALT0000 | eukaryotic translation elongation fa   | EEF2     | 0.893981 | 147517  |
| ENSGALT0000 | eukaryotic elongation factor-2 kina    | EEF2K    | 0.975768 | 894     |
| ENSGALT0000 | eukaryotic elongation factor, selenc   | EEFSEC   | 0.98169  | 666.5   |
| ENSGALT0000 | endonuclease/exonuclease/phosph        | EEP1     | 0.704737 | 415     |
| ENSGALT0000 | EF-hand calcium binding domain 1       | EFCAB1   | 0.776693 | 62.4862 |
| ENSGALT0000 | EF-hand calcium binding domain 1       | EFCAB11  | 0.941526 | 54.5    |
| ENSGALT0000 | EF-hand calcium binding domain 2       | EFCAB2   | 0.915804 | 38.5    |
| ENSGALT0000 | EF-hand calcium binding domain 4       | EFCAB4A  | 0.993531 | 179     |
| ENSGALT0000 | EF-hand calcium binding domain 5       | EFCAB5   | 0.989529 | 495.5   |
| ENSGALT0000 | EF-hand calcium binding domain 6       | EFCAB6   | 0.416726 | 91.5    |
| ENSGALT0000 | EF-hand calcium binding domain 7       | EFCAB7   | 0.995363 | 204     |
| ENSGALT0000 | EGF containing fibulin-like extracel   | EFEMP1   | 0.710232 | 400     |
| ENSGALT0000 | EF-hand domain family, member A        | EFHA1    | 0.993652 | 478     |
| ENSGALT0000 | EF-hand domain family, member A        | EFHA2    | 0.963637 | 887.5   |
| ENSGALT0000 | EF-hand domain family, member B        | EFHB     | 0.562993 | 1.5     |
| ENSGALT0000 | EF-hand domain (C-terminal) cont       | EFHC1    | 0.986551 | 98.4999 |
| ENSGALT0000 | EF-hand domain (C-terminal) cont       | EFHC2    | 0.985767 | 78      |
| ENSGALT0000 | EF-hand domain family, member D        | EFHD1    | 0.700019 | 638.119 |
| ENSGALT0000 | EF-hand domain family, member D        | EFHD2    | 0.585354 | 1267.38 |

|                                                      |          |          |         |
|------------------------------------------------------|----------|----------|---------|
| ENSGALT0000 ephrin-A5                                | EFNA5    | 0.734774 | 62      |
| ENSGALT0000 ephrin-B1                                | EFNB1    | 0.981683 | 4735.35 |
| ENSGALT0000 ephrin-B2                                | EFNB2    | 0.904649 | 1052.01 |
| ENSGALT0000 EFR3 homolog A ( <i>S. cerevisiae</i> )  | EFR3A    | 0.829772 | 3300.5  |
| ENSGALT0000 EFR3 homolog B ( <i>S. cerevisiae</i> )  | EFR3B    | 0.788551 | 479     |
| ENSGALT0000 elongation factor Tu GTP binding d       | EFTUD1   | 0.973353 | 1269.98 |
| ENSGALT0000 elongation factor Tu GTP binding d       | EFTUD2   | 0.845714 | 7540.89 |
| ENSGALT0000 epidermal growth factor                  | EGF      | 0.579739 | 28      |
| ENSGALT0000 EGF-like-domain, multiple 6              | EGFL6    | 0.955631 | 726.5   |
| ENSGALT0000 EGF-like-domain, multiple 7              | EGFL7    | 0.916288 | 985     |
| ENSGALT0000 EGF-like, fibronectin type III and la    | EGFLAM   | 0.786493 | 959     |
| ENSGALT0000 epidermal growth factor receptor         | EGFR     | 0.998485 | 3565.52 |
| ENSGALT0000 egl nine homolog 1 ( <i>C. elegans</i> ) | EGLN1    | 0.984377 | 1303.52 |
| ENSGALT0000 egl nine homolog 3 ( <i>C. elegans</i> ) | EGLN3    | 0.613445 | 136     |
| ENSGALT0000 early growth response 1                  | EGR1     | 0.890941 | 219     |
| ENSGALT0000 early growth response 4                  | EGR4     | 0.642448 | 7       |
| ENSGALT0000 EH domain binding protein 1              | EHBP1    | 0.919555 | 2701.5  |
| ENSGALT0000 EH-domain containing 3                   | EHD3     | 0.95172  | 6346    |
| ENSGALT0000 EH-domain containing 4                   | EHD4     | 0.939979 | 281     |
| ENSGALT0000 ets homologous factor                    | EHF      | 0.916387 | 11      |
| ENSGALT0000 enoyl-CoA, hydratase/3-hydroxyac         | EHHADH   | 0.991322 | 318.5   |
| ENSGALT0000 euchromatic histone-lysine N-meth        | EHMT1    | 0.969885 | 6419.47 |
| ENSGALT0000 etoposide induced 2.4 mRNA               | EI24     | 0.890799 | 3739    |
| ENSGALT0000 eukaryotic translation initiation fact   | EIF1     | 0.757709 | 6185.13 |
| ENSGALT0000 eukaryotic translation initiation fact   | EIF1AY   | 0.821031 | 2721.52 |
| ENSGALT0000 eukaryotic translation initiation fact   | EIF1B    | 0.961222 | 1212    |
| ENSGALT0000 eukaryotic translation initiation fact   | EIF2A    | 0.901145 | 1232.51 |
| ENSGALT0000 eukaryotic translation initiation fact   | EIF2AK1  | 0.977613 | 1342.99 |
| ENSGALT0000 eukaryotic translation initiation fact   | EIF2AK2  | 0.967755 | 332.5   |
| ENSGALT0000 eukaryotic translation initiation fact   | EIF2AK3  | 0.990552 | 825.5   |
| ENSGALT0000 eukaryotic translation initiation fact   | EIF2B2   | 0.702702 | 2655    |
| ENSGALT0000 eukaryotic translation initiation fact   | EIF2B3   | 0.83221  | 1178.01 |
| ENSGALT0000 eukaryotic translation initiation fact   | EIF2B4   | 0.863102 | 1779    |
| ENSGALT0000 eukaryotic translation initiation fact   | EIF2B5   | 0.893537 | 1359.5  |
| ENSGALT0000 eukaryotic translation initiation fact   | EIF2C1   | 0.967486 | 3243.11 |
| ENSGALT0000 eukaryotic translation initiation fact   | EIF2C2   | 0.986758 | 451     |
| ENSGALT0000 eukaryotic translation initiation fact   | EIF2C3   | 0.98047  | 1207.28 |
| ENSGALT0000 eukaryotic translation initiation fact   | EIF2C4   | 0.996658 | 3909.13 |
| ENSGALT0000 eukaryotic translation initiation fact   | EIF2S1   | 0.83537  | 3242    |
| ENSGALT0000 eukaryotic translation initiation fact   | EIF2S2   | 0.521228 | 1892.98 |
| ENSGALT0000 eukaryotic translation initiation fact   | EIF2S3   | 0.89219  | 8602.5  |
| ENSGALT0000 eukaryotic translation initiation fact   | EIF3A    | 0.960425 | 10260.9 |
| ENSGALT0000 eukaryotic translation initiation fact   | EIF3D    | 0.912285 | 9636.26 |
| ENSGALT0000 eukaryotic translation initiation fact   | EIF3E    | 0.889266 | 9992.5  |
| ENSGALT0000 eukaryotic translation initiation fact   | EIF3F    | 0.69086  | 7976    |
| ENSGALT0000 eukaryotic translation initiation fact   | EIF3H    | 0.782588 | 8134.5  |
| ENSGALT0000 eukaryotic translation initiation fact   | EIF3I    | 0.734187 | 7599.5  |
| ENSGALT0000 eukaryotic translation initiation fact   | EIF3J    | 0.898019 | 1379.5  |
| ENSGALT0000 eukaryotic translation initiation fact   | EIF3L    | 0.809041 | 16467.4 |
| ENSGALT0000 eukaryotic translation initiation fact   | EIF3M    | 0.845417 | 7243.56 |
| ENSGALT0000 eukaryotic translation initiation fact   | EIF4A2   | 0.861247 | 23522.9 |
| ENSGALT0000 eukaryotic translation initiation fact   | EIF4A3   | 0.72982  | 5584.43 |
| ENSGALT0000 eukaryotic translation initiation fact   | EIF4E    | 0.872163 | 2196    |
| ENSGALT0000 eukaryotic translation initiation fact   | EIF4E2   | 0.801555 | 1622.5  |
| ENSGALT0000 eukaryotic translation initiation fact   | EIF4E3   | 0.96346  | 202     |
| ENSGALT0000 eukaryotic translation initiation fact   | EIF4EBP1 | 0.369683 | 4388    |

|                                                                                                          |          |         |       |
|----------------------------------------------------------------------------------------------------------|----------|---------|-------|
| ENSGALT0000 eukaryotic translation initiation factor EIF4EBP2                                            | 0.460112 | 596     |       |
| ENSGALT0000 eukaryotic translation initiation factor EIF4ENIF1                                           | 0.970534 | 1014.49 |       |
| ENSGALT0000 eukaryotic translation initiation factor EIF4G1                                              | 0.961686 | 9019.5  |       |
| ENSGALT0000 eukaryotic translation initiation factor EIF4G2                                              | 0.939957 | 44643   |       |
| ENSGALT0000 eukaryotic translation initiation factor EIF4G3                                              | 0.973837 | 6660    |       |
| ENSGALT0000 eukaryotic translation initiation factor EIF4H                                               | 0.934729 | 6533.45 |       |
| ENSGALT0000 eukaryotic translation initiation factor EIF5                                                | 0.951201 | 8284.1  |       |
| ENSGALT0000 eukaryotic translation initiation factor EIF5A2                                              | 0.827283 | 4508.53 |       |
| ENSGALT0000 eukaryotic translation initiation factor EIF5B                                               | 0.947998 | 2654.48 |       |
| ENSGALT0000 eukaryotic translation initiation factor EIF6                                                | 0.84358  | 3628.57 |       |
| ENSGALT0000 eluC homolog 2 (E. coli)                                                                     | ELAC2    | 0.92083 | 961.5 |
| ENSGALT0000 ELAV (embryonic lethal, abnormal development) ELAVL1                                         | 0.950965 | 2936.5  |       |
| ENSGALT0000 ELAV (embryonic lethal, abnormal development) ELAVL2                                         | 0.757897 | 166.5   |       |
| ENSGALT0000 ELAV (embryonic lethal, abnormal development) ELAVL4                                         | 0.663286 | 3236    |       |
| ENSGALT0000 E74-like factor 1 (ets domain transcription factor) ELF1                                     | 0.977507 | 625.002 |       |
| ENSGALT0000 E74-like factor 2 (ets domain transcription factor) ELF2                                     | 0.970579 | 1811    |       |
| ENSGALT0000 E74-like factor 3 (ets domain transcription factor) ELF3                                     | 0.994906 | 180.5   |       |
| ENSGALT0000 E74-like factor 5 (ets domain transcription factor) ELF5                                     | 0.494877 | 1378.5  |       |
| ENSGALT0000 extracellular leucine-rich repeat and fibronectin type III domain containing protein 1 ELFN1 | 0.910356 | 323.5   |       |
| ENSGALT0000 extracellular leucine-rich repeat and fibronectin type III domain containing protein 2 ELFN2 | 0.738338 | 18.5    |       |
| ENSGALT0000 ELK3, ETS-domain protein (SRF activator) ELK3                                                | 0.804596 | 1852    |       |
| ENSGALT0000 ELK4, ETS-domain protein (SRF activator) ELK4                                                | 0.949385 | 243.5   |       |
| ENSGALT0000 elongation factor RNA polymerase ELL                                                         | 0.972247 | 1402    |       |
| ENSGALT0000 elongation factor, RNA polymerase ELL2                                                       | 0.999868 | 136     |       |
| ENSGALT0000 engulfment and cell motility 1 ELMO1                                                         | 0.685353 | 584.501 |       |
| ENSGALT0000 engulfment and cell motility 2 ELMO2                                                         | 0.935943 | 4489.99 |       |
| ENSGALT0000 engulfment and cell motility 3 ELMO3                                                         | 0.969029 | 581.5   |       |
| ENSGALT0000 ELMO/CED-12 domain containing protein 1 ELMOD1                                               | 0.994754 | 994     |       |
| ENSGALT0000 ELMO/CED-12 domain containing protein 2 ELMOD2                                               | 0.947582 | 2038.5  |       |
| ENSGALT0000 elastin ELN                                                                                  | 0.911666 | 1116.5  |       |
| ENSGALT0000 ELOVL fatty acid elongase 1 ELOVL1                                                           | 0.988481 | 2541.5  |       |
| ENSGALT0000 ELOVL fatty acid elongase 2 ELOVL2                                                           | 0.702221 | 38      |       |
| ENSGALT0000 ELOVL fatty acid elongase 3 ELOVL3                                                           | 0.261655 | 2       |       |
| ENSGALT0000 ELOVL fatty acid elongase 4 ELOVL4                                                           | 0.958477 | 572     |       |
| ENSGALT0000 ELOVL fatty acid elongase 5 ELOVL5                                                           | 0.763181 | 778     |       |
| ENSGALT0000 ELOVL fatty acid elongase 6 ELOVL6                                                           | 0.945077 | 289     |       |
| ENSGALT0000 ELOVL fatty acid elongase 7 ELOVL7                                                           | 0.935275 | 82.5    |       |
| ENSGALT0000 elongation protein 2 homolog (S. cerevisiae) ELP2                                            | 0.894243 | 472     |       |
| ENSGALT0000 elongation protein 3 homolog (S. cerevisiae) ELP3                                            | 0.889464 | 1017.5  |       |
| ENSGALT0000 elongation protein 4 homolog (S. cerevisiae) ELP4                                            | 0.931374 | 411     |       |
| ENSGALT0000 EGF, latrophilin and seven transmembrane domain containing protein 1 ELTD1                   | 0.82594  | 87.5    |       |
| ENSGALT0000 embigin homolog (mouse) EMB                                                                  | 0.884802 | 602.997 |       |
| ENSGALT0000 essential meiotic endonuclease 1 hEME1                                                       | 0.928546 | 485     |       |
| ENSGALT0000 essential meiotic endonuclease 1 hEME2                                                       | 0.948956 | 342.5   |       |
| ENSGALT0000 EMG1 nucleolar protein homolog (S. cerevisiae) EMG1                                          | 0.566527 | 616     |       |
| ENSGALT0000 EMI domain containing 1 EMID1                                                                | 0.953158 | 902     |       |
| ENSGALT0000 elastin microfibril interfacier 2 EMILIN2                                                    | 0.982666 | 1002.5  |       |
| ENSGALT0000 elastin microfibril interfacier 3 EMILIN3                                                    | 0.628141 | 571.5   |       |
| ENSGALT0000 echinoderm microtubule associated protein 1 EML1                                             | 0.908473 | 2838.5  |       |
| ENSGALT0000 echinoderm microtubule associated protein 4 EML4                                             | 0.993864 | 2767.06 |       |
| ENSGALT0000 echinoderm microtubule associated protein 5 EML5                                             | 0.830035 | 87      |       |
| ENSGALT0000 echinoderm microtubule associated protein 6 EML6                                             | 0.925712 | 176     |       |
| ENSGALT0000 epithelial membrane protein 1 EMP1                                                           | 0.959133 | 60.5    |       |
| ENSGALT0000 epithelial membrane protein 2 EMP2                                                           | 0.965659 | 200.5   |       |
| ENSGALT0000 empty spiracles homeobox 2 EMX2                                                              | 0.844766 | 3174.5  |       |
| ENSGALT0000 enabled homolog (Drosophila) ENAH                                                            | 0.985977 | 4267.6  |       |

|                                                                  |           |          |
|------------------------------------------------------------------|-----------|----------|
| ENSGALT0000 ectodermal-neural cortex 1 (with B <sup>-</sup> ENC1 | 0.632053  | 462      |
| ENSGALT0000 endonuclease domain containing 1 ENDOD1              | 0.932072  | 107      |
| ENSGALT0000 endonuclease G ENDOG                                 | 0.773673  | 989      |
| ENSGALT0000 endonuclease, polyU-specific ENDOU                   | 0.639801  | 1        |
| ENSGALT0000 endonuclease V ENDOV                                 | 0.864987  | 475.238  |
| ENSGALT0000 endoglin ENG                                         | 0.898284  | 500      |
| ENSGALT0000 endo-beta-N-acetylglucosaminidase ENGASE             | 0.754256  | 372.5    |
| ENSGALT0000 enkurin, TRPC channel interacting ENKUR              | 0.755423  | 154.5    |
| ENSGALT0000 enolase 1, (alpha) ENO1                              | 0.972604  | 61358.5  |
| ENSGALT0000 enolase 2 (gamma, neuronal) ENO2                     | 0.736573  | 171.5    |
| ENSGALT0000 enolase family member 4 ENO4                         | 0.97502   | 139      |
| ENSGALT0000 enolase-phosphatase 1 ENOPH1                         | 0.734483  | 2353     |
| ENSGALT0000 ecto-NOX disulfide-thiol exchanger ENOX1             | 0.738347  | 312.5    |
| ENSGALT0000 ecto-NOX disulfide-thiol exchanger ENOX2             | 0.977083  | 1061     |
| ENSGALT0000 glutamyl aminopeptidase (aminopeptidase) ENPEP       | 0.651023  | 26       |
| ENSGALT0000 ectonucleotide pyrophosphatase/pla ENPP1             | 0.995138  | 516      |
| ENSGALT0000 ectonucleotide pyrophosphatase/pla ENPP2             | 0.646894  | 65.5     |
| ENSGALT0000 ectonucleotide pyrophosphatase/pla ENPP3             | 0.98151   | 10       |
| ENSGALT0000 ectonucleotide pyrophosphatase/pla ENPP4             | 0.916863  | 360.5    |
| ENSGALT0000 ectonucleotide pyrophosphatase/pla ENPP6             | 0.980203  | 58       |
| ENSGALT0000 ectonucleotide pyrophosphatase/pla ENPP7             | 0.940921  | 20.5     |
| ENSGALT0000 \N ENSGALG000000000C                                 | 0.779783  | 3.63728  |
| ENSGALT0000 Uncharacterized protein ENSGALG000000000C            | 0.902646  | 266.5    |
| ENSGALT0000 Uncharacterized protein ENSGALG000000000C            | 0.985305  | 76.5     |
| ENSGALT0000 \N ENSGALG000000000C                                 | 0.71945   | 20.5     |
| ENSGALT0000 \N ENSGALG000000000C                                 | 0.574211  | 383.5    |
| ENSGALT0000 Uncharacterized protein ENSGALG000000000C            | 0.967293  | 346.5    |
| ENSGALT0000 \N ENSGALG000000000C                                 | 0.783327  | 2.4828   |
| ENSGALT0000 \N ENSGALG000000000C                                 | 0.935715  | 252.862  |
| ENSGALT0000 \N ENSGALG000000000C                                 | 0.898356  | 1        |
| ENSGALT0000 \N ENSGALG000000000C                                 | 0.985331  | 1335.5   |
| ENSGALT0000 \N ENSGALG000000000C                                 | 0.875604  | 40       |
| ENSGALT0000 \N ENSGALG000000000C                                 | 0.549712  | 5        |
| ENSGALT0000 \N ENSGALG000000000C ?                               |           | 0        |
| ENSGALT0000 Uncharacterized protein ENSGALG000000000C            | 0.923447  | 64.3202  |
| ENSGALT0000 \N ENSGALG000000000C                                 | 0.464758  | 1.37E-18 |
| ENSGALT0000 Uncharacterized protein ENSGALG000000000C            | 0.962437  | 1563.5   |
| ENSGALT0000 \N ENSGALG000000000C                                 | 0.996355  | 104.702  |
| ENSGALT0000 \N ENSGALG0000000010                                 | 0.513943  | 0.5      |
| ENSGALT0000 Uncharacterized protein ENSGALG0000000010            | 0.856697  | 6.11765  |
| ENSGALT0000 \N ENSGALG0000000010                                 | 0.464758  | 1.97E-07 |
| ENSGALT0000 \N ENSGALG0000000010                                 | 0.990846  | 62.1586  |
| ENSGALT0000 Uncharacterized protein ENSGALG0000000010            | 0.98057   | 128.5    |
| ENSGALT0000 \N ENSGALG0000000010                                 | 0.407337  | 0        |
| ENSGALT0000 Uncharacterized protein ENSGALG0000000010            | 0.854234  | 24.6991  |
| ENSGALT0000 Uncharacterized protein ENSGALG0000000010            | 0.776647  | 19.5     |
| ENSGALT0000 \N ENSGALG0000000010                                 | 0.980156  | 113.755  |
| ENSGALT0000 \N ENSGALG0000000010                                 | 0.0961247 | 22.3111  |
| ENSGALT0000 Uncharacterized protein ENSGALG0000000010            | 0.991813  | 48       |
| ENSGALT0000 Uncharacterized protein ENSGALG0000000010            | 0.995567  | 88.5     |
| ENSGALT0000 \N ENSGALG0000000010                                 | 0.908928  | 12.4223  |
| ENSGALT0000 Uncharacterized protein ENSGALG0000000010            | 0.961861  | 46       |
| ENSGALT0000 \N ENSGALG0000000010                                 | 0.791102  | 14.5     |
| ENSGALT0000 Uncharacterized protein ENSGALG0000000010            | 0.978862  | 31.1134  |
| ENSGALT0000 Uncharacterized protein ENSGALG0000000020            | 0.818488  | 0.5      |
| ENSGALT0000 Uncharacterized protein ENSGALG0000000020            | 0.303206  | 4        |

|                                     |                           |         |
|-------------------------------------|---------------------------|---------|
| ENSGALT0000 Uncharacterized protein | ENSGALG000000002 0.974256 | 59.5    |
| ENSGALT0000 \N                      | ENSGALG000000002 0.566463 | 2.7031  |
| ENSGALT0000 \N                      | ENSGALG000000002 0.874799 | 23      |
| ENSGALT0000 Uncharacterized protein | ENSGALG000000002 0.960923 | 78.9851 |
| ENSGALT0000 \N                      | ENSGALG000000002 0.539769 | 3.2115  |
| ENSGALT0000 Uncharacterized protein | ENSGALG000000002 0.649519 | 0.5     |
| ENSGALT0000 Uncharacterized protein | ENSGALG000000002 0.513943 | 0.5     |
| ENSGALT0000 \N                      | ENSGALG000000002 0.441782 | 0.88581 |
| ENSGALT0000 Uncharacterized protein | ENSGALG000000002 0.962766 | 353.5   |
| ENSGALT0000 Uncharacterized protein | ENSGALG000000002 0.994516 | 2565.73 |
| ENSGALT0000 Uncharacterized protein | ENSGALG000000002 0.992292 | 236.94  |
| ENSGALT0000 Uncharacterized protein | ENSGALG000000003 0.994299 | 2734.5  |
| ENSGALT0000 \N                      | ENSGALG000000003 0.984297 | 5737.65 |
| ENSGALT0000 \N                      | ENSGALG000000003 0.989514 | 237.4   |
| ENSGALT0000 Uncharacterized protein | ENSGALG000000003 0.822652 | 9.76147 |
| ENSGALT0000 \N                      | ENSGALG000000003 0.534404 | 0.5     |
| ENSGALT0000 \N                      | ENSGALG000000003 0.860171 | 2552.45 |
| ENSGALT0000 \N                      | ENSGALG000000003 0.896493 | 91.4856 |
| ENSGALT0000 \N                      | ENSGALG000000003 0.986867 | 507.324 |
| ENSGALT0000 \N                      | ENSGALG000000003 0.873715 | 571.5   |
| ENSGALT0000 Uncharacterized protein | ENSGALG000000004 0.995316 | 109.5   |
| ENSGALT0000 Uncharacterized protein | ENSGALG000000004 0.959004 | 859.865 |
| ENSGALT0000 \N                      | ENSGALG000000004 0.975505 | 124.378 |
| ENSGALT0000 \N                      | ENSGALG000000004 0.649519 | 0.5     |
| ENSGALT0000 \N                      | ENSGALG000000004 0.780657 | 2       |
| ENSGALT0000 Uncharacterized protein | ENSGALG000000004 0.812134 | 40.5    |
| ENSGALT0000 Uncharacterized protein | ENSGALG000000004 0.901881 | 21      |
| ENSGALT0000 \N                      | ENSGALG000000004 0.63639  | 0.51817 |
| ENSGALT0000 Uncharacterized protein | ENSGALG000000004 0.742074 | 4.90789 |
| ENSGALT0000 Uncharacterized protein | ENSGALG000000004 0.980825 | 21      |
| ENSGALT0000 Uncharacterized protein | ENSGALG000000004 0.016655 | 3.5     |
| ENSGALT0000 Uncharacterized protein | ENSGALG000000004 0.986738 | 57.5    |
| ENSGALT0000 Uncharacterized protein | ENSGALG000000004 0.539038 | 2       |
| ENSGALT0000 Uncharacterized protein | ENSGALG000000004 0.385204 | 0.5     |
| ENSGALT0000 \N                      | ENSGALG000000005 0.302949 | 1283    |
| ENSGALT0000 Uncharacterized protein | ENSGALG000000005 0.517053 | 61.5    |
| ENSGALT0000 Uncharacterized protein | ENSGALG000000005 0.975917 | 1208.21 |
| ENSGALT0000 Uncharacterized protein | ENSGALG000000005 0.892519 | 356.5   |
| ENSGALT0000 \N                      | ENSGALG000000005 0.595508 | 0       |
| ENSGALT0000 Uncharacterized protein | ENSGALG000000005 0.647823 | 3.79772 |
| ENSGALT0000 \N                      | ENSGALG000000006 0.961797 | 708.985 |
| ENSGALT0000 Uncharacterized protein | ENSGALG000000006 0.592297 | 810.698 |
| ENSGALT0000 Uncharacterized protein | ENSGALG000000006 0.988864 | 10.5921 |
| ENSGALT0000 Uncharacterized protein | ENSGALG000000006 0.985705 | 227.05  |
| ENSGALT0000 Uncharacterized protein | ENSGALG000000006 0.778348 | 5.5     |
| ENSGALT0000 \N                      | ENSGALG000000006 0.464758 | 0.5     |
| ENSGALT0000 Uncharacterized protein | ENSGALG000000006 0.374549 | 2078    |
| ENSGALT0000 Uncharacterized protein | ENSGALG000000006 0.986106 | 552.538 |
| ENSGALT0000 Uncharacterized protein | ENSGALG000000006 0.563787 | 7.5     |
| ENSGALT0000 Uncharacterized protein | ENSGALG000000007 0.996082 | 290.258 |
| ENSGALT0000 Uncharacterized protein | ENSGALG000000007 0.5652   | 23.5    |
| ENSGALT0000 Uncharacterized protein | ENSGALG000000007 0.972005 | 708.5   |
| ENSGALT0000 \N                      | ENSGALG000000007 0.963086 | 106.937 |
| ENSGALT0000 Uncharacterized protein | ENSGALG000000007 0.915272 | 75      |
| ENSGALT0000 \N                      | ENSGALG000000007 0.996529 | 409     |
| ENSGALT0000 \N                      | ENSGALG000000007 0.993703 | 762     |



|                                                 |                           |          |
|-------------------------------------------------|---------------------------|----------|
| ENSGALT0000 Uncharacterized protein             | ENSGALG00000000ε ?        | 0        |
| ENSGALT0000 \N                                  | ENSGALG00000000ε 0.89305  | 5.5      |
| ENSGALT0000 \N                                  | ENSGALG00000000ε 0.464952 | 9.76E-14 |
| ENSGALT0000 \N                                  | ENSGALG00000000ε 0.972782 | 1215.5   |
| ENSGALT0000 Uncharacterized protein             | ENSGALG00000000ε ?        | 0        |
| ENSGALT0000 \N                                  | ENSGALG00000000ε 0.990866 | 470.5    |
| ENSGALT0000 Uncharacterized protein             | ENSGALG00000000ε 0.995244 | 1029.42  |
| ENSGALT0000 \N                                  | ENSGALG00000000ε 0.780182 | 0.51063  |
| ENSGALT0000 \N                                  | ENSGALG00000000ε 0.81138  | 24.9156  |
| ENSGALT0000 \N                                  | ENSGALG00000000ε ?        | 0        |
| ENSGALT0000 Uncharacterized protein             | ENSGALG00000000ε 0.152915 | 0.5      |
| ENSGALT0000 Uncharacterized protein             | ENSGALG00000000ε 0.964492 | 155.5    |
| ENSGALT0000 Uncharacterized protein             | ENSGALG00000000ε 0.93281  | 107      |
| ENSGALT0000 \N                                  | ENSGALG00000000ε 0.270486 | 2        |
| ENSGALT0000 Uncharacterized protein             | ENSGALG000000010 0.846927 | 2254.44  |
| ENSGALT0000 Uncharacterized protein             | ENSGALG000000010 0.708772 | 299      |
| ENSGALT0000 Uncharacterized protein             | ENSGALG000000010 0.965926 | 628      |
| ENSGALT0000 \N                                  | ENSGALG000000010 0.540146 | 4.27697  |
| ENSGALT0000 Uncharacterized protein             | ENSGALG000000010 ?        | 0        |
| ENSGALT0000 Uncharacterized protein             | ENSGALG000000010 0.464758 | 0        |
| ENSGALT0000 Uncharacterized protein             | ENSGALG000000011 0.119349 | 41.2986  |
| ENSGALT0000 Uncharacterized protein             | ENSGALG000000011 ?        | 0        |
| ENSGALT0000 Uncharacterized protein             | ENSGALG000000011 0.895841 | 284      |
| ENSGALT0000 Fibroblast growth factor receptor C | ENSGALG000000011 0.905626 | 200      |
| ENSGALT0000 \N                                  | ENSGALG000000011 0.863302 | 47       |
| ENSGALT0000 Uncharacterized protein             | ENSGALG000000011 0.536046 | 25       |
| ENSGALT0000 \N                                  | ENSGALG000000012 0.464758 | 0        |
| ENSGALT0000 Uncharacterized protein             | ENSGALG000000012 0.778998 | 4.72303  |
| ENSGALT0000 Uncharacterized protein             | ENSGALG000000012 0.811145 | 4        |
| ENSGALT0000 Uncharacterized protein             | ENSGALG000000012 0.927112 | 53       |
| ENSGALT0000 \N                                  | ENSGALG000000012 0.988302 | 1158.57  |
| ENSGALT0000 \N                                  | ENSGALG000000012 0.864006 | 18.4517  |
| ENSGALT0000 Uncharacterized protein             | ENSGALG000000012 0.925942 | 223.5    |
| ENSGALT0000 \N                                  | ENSGALG000000012 0.94441  | 659.5    |
| ENSGALT0000 Uncharacterized protein             | ENSGALG000000012 0.887845 | 1368     |
| ENSGALT0000 \N                                  | ENSGALG000000012 0.721956 | 202.724  |
| ENSGALT0000 Uncharacterized protein             | ENSGALG000000012 0.958105 | 90.5     |
| ENSGALT0000 \N                                  | ENSGALG000000013 ?        | 0        |
| ENSGALT0000 \N                                  | ENSGALG000000013 0.940492 | 11.5     |
| ENSGALT0000 Uncharacterized protein             | ENSGALG000000013 0.91235  | 3.5      |
| ENSGALT0000 Uncharacterized protein             | ENSGALG000000013 0.994898 | 57       |
| ENSGALT0000 Uncharacterized protein             | ENSGALG000000013 0.649519 | 0.5      |
| ENSGALT0000 Uncharacterized protein             | ENSGALG000000013 0.962658 | 202.55   |
| ENSGALT0000 \N                                  | ENSGALG000000013 0.95136  | 58.7881  |
| ENSGALT0000 Uncharacterized protein             | ENSGALG000000013 0.858556 | 387.638  |
| ENSGALT0000 Uncharacterized protein             | ENSGALG000000014 0.99018  | 3        |
| ENSGALT0000 \N                                  | ENSGALG000000014 0.251262 | 3.82E-17 |
| ENSGALT0000 \N                                  | ENSGALG000000014 0.842557 | 2510     |
| ENSGALT0000 Uncharacterized protein             | ENSGALG000000014 0.987726 | 47.5     |
| ENSGALT0000 Uncharacterized protein             | ENSGALG000000014 0.978622 | 340.362  |
| ENSGALT0000 Uncharacterized protein             | ENSGALG000000014 0.941003 | 667.001  |
| ENSGALT0000 Uncharacterized protein             | ENSGALG000000014 0.542743 | 1        |
| ENSGALT0000 Uncharacterized protein             | ENSGALG000000015 0.972432 | 654      |
| ENSGALT0000 Uncharacterized protein             | ENSGALG000000015 0.943934 | 1.5      |
| ENSGALT0000 Uncharacterized protein             | ENSGALG000000015 0.895843 | 6        |
| ENSGALT0000 \N                                  | ENSGALG000000015 0.998193 | 69.2011  |

|                                              |                           |          |
|----------------------------------------------|---------------------------|----------|
| ENSGALT0000 Uncharacterized protein          | ENSGALG000000016 0.63064  | 260.5    |
| ENSGALT0000 Uncharacterized protein          | ENSGALG000000016 0.482747 | 1217     |
| ENSGALT0000 \N                               | ENSGALG000000016 0.802736 | 60.0037  |
| ENSGALT0000 \N                               | ENSGALG000000016 0.798768 | 4.93636  |
| ENSGALT0000 Uncharacterized protein          | ENSGALG000000017 0.989466 | 271      |
| ENSGALT0000 Uncharacterized protein          | ENSGALG000000017 0.655418 | 257.5    |
| ENSGALT0000 Uncharacterized protein          | ENSGALG000000017 0        | 0        |
| ENSGALT0000 Uncharacterized protein          | ENSGALG000000017 0.947176 | 292.5    |
| ENSGALT0000 Uncharacterized protein          | ENSGALG000000017 0.833822 | 12.9025  |
| ENSGALT0000 Uncharacterized protein          | ENSGALG000000017 0.924584 | 13.5     |
| ENSGALT0000 ATP synthase subunit alphaUnchar | ENSGALG000000017 0.742167 | 2076.91  |
| ENSGALT0000 Uncharacterized protein          | ENSGALG000000017 0.722096 | 0.5      |
| ENSGALT0000 Uncharacterized protein          | ENSGALG000000018 0.990423 | 66.8575  |
| ENSGALT0000 Uncharacterized protein          | ENSGALG000000018 0.696884 | 182.313  |
| ENSGALT0000 \N                               | ENSGALG000000018 0.445552 | 0.85529  |
| ENSGALT0000 \N                               | ENSGALG000000018 0.464758 | 2.31E-08 |
| ENSGALT0000 Uncharacterized protein          | ENSGALG000000018 0.464758 | 1        |
| ENSGALT0000 Uncharacterized protein          | ENSGALG000000018 0.898754 | 294      |
| ENSGALT0000 \N                               | ENSGALG000000018 0.933412 | 285.554  |
| ENSGALT0000 Uncharacterized protein          | ENSGALG000000019 0.306454 | 0.5      |
| ENSGALT0000 Uncharacterized protein          | ENSGALG000000019 0.210039 | 89       |
| ENSGALT0000 Uncharacterized protein          | ENSGALG000000019 0.798354 | 313      |
| ENSGALT0000 Uncharacterized protein          | ENSGALG000000019 0.915098 | 465.914  |
| ENSGALT0000 \N                               | ENSGALG000000019 0.950328 | 3019.4   |
| ENSGALT0000 \N                               | ENSGALG000000019 0.824074 | 2072.5   |
| ENSGALT0000 \N                               | ENSGALG000000019 0.554454 | 5.81E-11 |
| ENSGALT0000 \N                               | ENSGALG000000020 ?        | 0        |
| ENSGALT0000 Uncharacterized protein          | ENSGALG000000020 0.990939 | 143      |
| ENSGALT0000 Uncharacterized protein          | ENSGALG000000020 0.969543 | 253.5    |
| ENSGALT0000 \N                               | ENSGALG000000020 0.725449 | 686.896  |
| ENSGALT0000 Uncharacterized protein          | ENSGALG000000020 0.680895 | 4        |
| ENSGALT0000 Uncharacterized protein          | ENSGALG000000020 0.763577 | 66       |
| ENSGALT0000 Uncharacterized protein          | ENSGALG000000021 0.94301  | 143      |
| ENSGALT0000 Uncharacterized protein          | ENSGALG000000021 0.427076 | 4        |
| ENSGALT0000 Uncharacterized protein          | ENSGALG000000021 0.841664 | 220.5    |
| ENSGALT0000 Uncharacterized protein          | ENSGALG000000021 0.97295  | 122      |
| ENSGALT0000 Uncharacterized protein          | ENSGALG000000022 0.96608  | 886      |
| ENSGALT0000 Uncharacterized protein          | ENSGALG000000022 ?        | 0        |
| ENSGALT0000 Uncharacterized protein          | ENSGALG000000022 0.943934 | 1        |
| ENSGALT0000 \N                               | ENSGALG000000022 ?        | 0        |
| ENSGALT0000 Uncharacterized protein          | ENSGALG000000022 0.602271 | 99       |
| ENSGALT0000 Uncharacterized protein          | ENSGALG000000022 0.615447 | 16       |
| ENSGALT0000 Uncharacterized protein          | ENSGALG000000023 0.990444 | 97.5151  |
| ENSGALT0000 Uncharacterized protein          | ENSGALG000000023 0.666144 | 3171.5   |
| ENSGALT0000 \N                               | ENSGALG000000023 0.999751 | 263      |
| ENSGALT0000 Uncharacterized protein          | ENSGALG000000023 0.955418 | 522      |
| ENSGALT0000 Uncharacterized protein          | ENSGALG000000024 0.977343 | 788      |
| ENSGALT0000 Uncharacterized protein          | ENSGALG000000024 0.738992 | 39       |
| ENSGALT0000 Uncharacterized protein          | ENSGALG000000024 0.98212  | 0.55289  |
| ENSGALT0000 Uncharacterized protein          | ENSGALG000000024 0.864678 | 4.29245  |
| ENSGALT0000 Uncharacterized protein          | ENSGALG000000024 0.929757 | 53.1567  |
| ENSGALT0000 Uncharacterized protein          | ENSGALG000000024 0.976552 | 297.5    |
| ENSGALT0000 Uncharacterized protein          | ENSGALG000000025 0.952315 | 89.5     |
| ENSGALT0000 Uncharacterized protein          | ENSGALG000000025 0.382218 | 22.183   |
| ENSGALT0000 Uncharacterized protein          | ENSGALG000000025 0.860996 | 2134     |
| ENSGALT0000 Uncharacterized protein          | ENSGALG000000025 0.112064 | 497      |

|                                     |                           |          |
|-------------------------------------|---------------------------|----------|
| ENSGALT0000 Uncharacterized protein | ENSGALG000000025 0.464758 | 0        |
| ENSGALT0000 Uncharacterized protein | ENSGALG000000025 0.958126 | 182      |
| ENSGALT0000 Uncharacterized protein | ENSGALG000000025 0.9994   | 123.135  |
| ENSGALT0000 Uncharacterized protein | ENSGALG000000025 0.932317 | 147.5    |
| ENSGALT0000 Uncharacterized protein | ENSGALG000000025 0.984866 | 74.7287  |
| ENSGALT0000 C-type lectin           | ENSGALG000000026 0.659073 | 76.0285  |
| ENSGALT0000 Uncharacterized protein | ENSGALG000000026 0.824484 | 1011     |
| ENSGALT0000 Uncharacterized protein | ENSGALG000000026 0.853815 | 0.5      |
| ENSGALT0000 \N                      | ENSGALG000000026 0.679716 | 233.5    |
| ENSGALT0000 Uncharacterized protein | ENSGALG000000026 0.925643 | 164      |
| ENSGALT0000 \N                      | ENSGALG000000027 0.755485 | 377      |
| ENSGALT0000 Uncharacterized protein | ENSGALG000000027 0.988246 | 76       |
| ENSGALT0000 Uncharacterized protein | ENSGALG000000027 0.843011 | 52       |
| ENSGALT0000 Uncharacterized protein | ENSGALG000000027 0.978992 | 48.5     |
| ENSGALT0000 Uncharacterized protein | ENSGALG000000027 0.862425 | 3.5      |
| ENSGALT0000 Uncharacterized protein | ENSGALG000000027 0.964578 | 939.5    |
| ENSGALT0000 Uncharacterized protein | ENSGALG000000027 0.875676 | 92.5     |
| ENSGALT0000 Uncharacterized protein | ENSGALG000000027 0.760075 | 33       |
| ENSGALT0000 \N                      | ENSGALG000000028 0.697576 | 7.10014  |
| ENSGALT0000 Uncharacterized protein | ENSGALG000000028 0.940053 | 10.5     |
| ENSGALT0000 \N                      | ENSGALG000000028 0.950605 | 29.4433  |
| ENSGALT0000 Uncharacterized protein | ENSGALG000000028 ?        | 0        |
| ENSGALT0000 Uncharacterized protein | ENSGALG000000028 0.932023 | 1469.04  |
| ENSGALT0000 Uncharacterized protein | ENSGALG000000028 0.865676 | 92       |
| ENSGALT0000 \N                      | ENSGALG000000028 0.767851 | 38.6573  |
| ENSGALT0000 \N                      | ENSGALG000000028 0.986751 | 1128.5   |
| ENSGALT0000 Uncharacterized protein | ENSGALG000000028 0.972561 | 398.412  |
| ENSGALT0000 Uncharacterized protein | ENSGALG000000029 0.801609 | 458.498  |
| ENSGALT0000 \N                      | ENSGALG000000029 0.848102 | 2.18349  |
| ENSGALT0000 Uncharacterized protein | ENSGALG000000029 0.88188  | 112.496  |
| ENSGALT0000 Uncharacterized protein | ENSGALG000000029 0.924927 | 14       |
| ENSGALT0000 \N                      | ENSGALG000000029 0.780657 | 1.5      |
| ENSGALT0000 \N                      | ENSGALG000000029 0.822475 | 189.835  |
| ENSGALT0000 Uncharacterized protein | ENSGALG000000030 0.63233  | 63.5975  |
| ENSGALT0000 \N                      | ENSGALG000000030 0.995    | 61       |
| ENSGALT0000 \N                      | ENSGALG000000030 0.913385 | 184.807  |
| ENSGALT0000 \N                      | ENSGALG000000030 0.938262 | 1059.88  |
| ENSGALT0000 \N                      | ENSGALG000000030 0.619466 | 3.4774   |
| ENSGALT0000 Uncharacterized protein | ENSGALG000000030 0.909531 | 198.5    |
| ENSGALT0000 Uncharacterized protein | ENSGALG000000030 0.734344 | 2.5      |
| ENSGALT0000 Uncharacterized protein | ENSGALG000000030 0.963491 | 33       |
| ENSGALT0000 \N                      | ENSGALG000000030 0.889863 | 4.68817  |
| ENSGALT0000 \N                      | ENSGALG000000030 0.951018 | 336.5    |
| ENSGALT0000 Uncharacterized protein | ENSGALG000000031 0.586223 | 2        |
| ENSGALT0000 Uncharacterized protein | ENSGALG000000031 0.947766 | 2771     |
| ENSGALT0000 \N                      | ENSGALG000000031 0.948082 | 288.034  |
| ENSGALT0000 \N                      | ENSGALG000000031 0.680829 | 14       |
| ENSGALT0000 Uncharacterized protein | ENSGALG000000031 0.603682 | 0.5      |
| ENSGALT0000 Uncharacterized protein | ENSGALG000000031 0.812    | 4.5      |
| ENSGALT0000 Uncharacterized protein | ENSGALG000000031 0.994548 | 133.5    |
| ENSGALT0000 Uncharacterized protein | ENSGALG000000031 0.603682 | 0        |
| ENSGALT0000 Uncharacterized protein | ENSGALG000000031 0.876088 | 1.5      |
| ENSGALT0000 Uncharacterized protein | ENSGALG000000032 0.991495 | 397      |
| ENSGALT0000 \N                      | ENSGALG000000032 ?        | 3.55E-25 |
| ENSGALT0000 Uncharacterized protein | ENSGALG000000032 0.902085 | 2250     |
| ENSGALT0000 Uncharacterized protein | ENSGALG000000032 0.977866 | 86       |

|                                     |                           |          |
|-------------------------------------|---------------------------|----------|
| ENSGALT0000 \N                      | ENSGALG000000032 0.849586 | 126.5    |
| ENSGALT0000 Uncharacterized protein | ENSGALG000000032 0.464758 | 0.5      |
| ENSGALT0000 Uncharacterized protein | ENSGALG000000032 0.949058 | 9194.74  |
| ENSGALT0000 \N                      | ENSGALG000000033 0.464758 | 1        |
| ENSGALT0000 \N                      | ENSGALG000000033 0.827999 | 778.5    |
| ENSGALT0000 Uncharacterized protein | ENSGALG000000033 0.986704 | 93.5     |
| ENSGALT0000 \N                      | ENSGALG000000033 0.98479  | 88.3009  |
| ENSGALT0000 \N                      | ENSGALG000000033 0.464758 | 0        |
| ENSGALT0000 \N                      | ENSGALG000000033 0.817958 | 69.152   |
| ENSGALT0000 \N                      | ENSGALG000000033 0.959636 | 219      |
| ENSGALT0000 Uncharacterized protein | ENSGALG000000034 0.99187  | 24       |
| ENSGALT0000 Uncharacterized protein | ENSGALG000000034 0.984669 | 138.5    |
| ENSGALT0000 Uncharacterized protein | ENSGALG000000034 0.848662 | 198.5    |
| ENSGALT0000 Uncharacterized protein | ENSGALG000000034 0.123783 | 1443.5   |
| ENSGALT0000 Uncharacterized protein | ENSGALG000000034 0.823894 | 24.5     |
| ENSGALT0000 Uncharacterized protein | ENSGALG000000034 0.949981 | 142.5    |
| ENSGALT0000 \N                      | ENSGALG000000034 0.944447 | 5354.99  |
| ENSGALT0000 Uncharacterized protein | ENSGALG000000034 0.826166 | 14       |
| ENSGALT0000 Uncharacterized protein | ENSGALG000000034 0.464758 | 0        |
| ENSGALT0000 Uncharacterized protein | ENSGALG000000035 0.852983 | 7.5      |
| ENSGALT0000 \N                      | ENSGALG000000035 0.933784 | 10.0404  |
| ENSGALT0000 Uncharacterized protein | ENSGALG000000035 0.981276 | 1763.97  |
| ENSGALT0000 Uncharacterized protein | ENSGALG000000035 0.596053 | 1738.5   |
| ENSGALT0000 Uncharacterized protein | ENSGALG000000035 0.673533 | 5.5      |
| ENSGALT0000 Uncharacterized protein | ENSGALG000000036 0.373857 | 27.5     |
| ENSGALT0000 Uncharacterized protein | ENSGALG000000036 0.813275 | 7.5      |
| ENSGALT0000 Uncharacterized protein | ENSGALG000000036 0.998726 | 270.5    |
| ENSGALT0000 Uncharacterized protein | ENSGALG000000036 0.978953 | 188.5    |
| ENSGALT0000 Uncharacterized protein | ENSGALG000000036 0.948028 | 290.5    |
| ENSGALT0000 Uncharacterized protein | ENSGALG000000036 0.771164 | 89.5     |
| ENSGALT0000 Uncharacterized protein | ENSGALG000000036 0.392103 | 2        |
| ENSGALT0000 Uncharacterized protein | ENSGALG000000036 0.705754 | 298.5    |
| ENSGALT0000 Uncharacterized protein | ENSGALG000000036 0.937839 | 25.5     |
| ENSGALT0000 Uncharacterized protein | ENSGALG000000036 0.964692 | 554.116  |
| ENSGALT0000 Uncharacterized protein | ENSGALG000000036 0.960915 | 2.5      |
| ENSGALT0000 Uncharacterized protein | ENSGALG000000036 0.972532 | 5        |
| ENSGALT0000 Uncharacterized protein | ENSGALG000000036 0.804859 | 1366     |
| ENSGALT0000 Uncharacterized protein | ENSGALG000000036 0.862433 | 14.8301  |
| ENSGALT0000 Uncharacterized protein | ENSGALG000000036 0.88772  | 1211     |
| ENSGALT0000 Uncharacterized protein | ENSGALG000000037 0.972687 | 198      |
| ENSGALT0000 \N                      | ENSGALG000000037 0.978949 | 22.3013  |
| ENSGALT0000 \N                      | ENSGALG000000038 0.917109 | 264      |
| ENSGALT0000 Uncharacterized protein | ENSGALG000000038 0.942967 | 67.5     |
| ENSGALT0000 Uncharacterized protein | ENSGALG000000038 0.12121  | 23.8721  |
| ENSGALT0000 Uncharacterized protein | ENSGALG000000038 0.932353 | 545.086  |
| ENSGALT0000 Uncharacterized protein | ENSGALG000000038 0.978995 | 44.5     |
| ENSGALT0000 \N                      | ENSGALG000000038 0.924264 | 18       |
| ENSGALT0000 Uncharacterized protein | ENSGALG000000038 0.75615  | 1054.5   |
| ENSGALT0000 Uncharacterized protein | ENSGALG000000039 0.847559 | 8.133    |
| ENSGALT0000 Uncharacterized protein | ENSGALG000000039 0.818488 | 0.5      |
| ENSGALT0000 Uncharacterized protein | ENSGALG000000039 0.881451 | 8.5      |
| ENSGALT0000 Uncharacterized protein | ENSGALG000000039 0.950295 | 61       |
| ENSGALT0000 \N                      | ENSGALG000000039 0.900334 | 37.1236  |
| ENSGALT0000 \N                      | ENSGALG000000040 0.635152 | 2.75E-11 |
| ENSGALT0000 \N                      | ENSGALG000000040 0.968927 | 440.918  |
| ENSGALT0000 Uncharacterized protein | ENSGALG000000040 0.242157 | 6.5      |

|                                     |                           |          |
|-------------------------------------|---------------------------|----------|
| ENSGALT0000 Uncharacterized protein | ENSGALG0000000410.793923  | 41.5     |
| ENSGALT0000 Uncharacterized protein | ENSGALG0000000410.470372  | 11.3258  |
| ENSGALT0000 Uncharacterized protein | ENSGALG000000041?         | 0        |
| ENSGALT0000 Uncharacterized protein | ENSGALG0000000410.694304  | 14.5     |
| ENSGALT0000 Uncharacterized protein | ENSGALG0000000410.580062  | 1.5      |
| ENSGALT0000 \N                      | ENSGALG0000000410.779047  | 29       |
| ENSGALT0000 Uncharacterized protein | ENSGALG0000000410.964881  | 6.56209  |
| ENSGALT0000 Uncharacterized protein | ENSGALG0000000410.464758  | 0        |
| ENSGALT0000 Uncharacterized protein | ENSGALG0000000420.0930179 | 8.5      |
| ENSGALT0000 Uncharacterized protein | ENSGALG0000000420.539519  | 7.5      |
| ENSGALT0000 Uncharacterized protein | ENSGALG0000000420.99803   | 107      |
| ENSGALT0000 Uncharacterized protein | ENSGALG0000000430.682925  | 139.5    |
| ENSGALT0000 Uncharacterized protein | ENSGALG0000000430.746309  | 28       |
| ENSGALT0000 \N                      | ENSGALG0000000430.994016  | 30.0283  |
| ENSGALT0000 \N                      | ENSGALG0000000430.794527  | 157.5    |
| ENSGALT0000 Uncharacterized protein | ENSGALG0000000430.944008  | 476.5    |
| ENSGALT0000 \N                      | ENSGALG0000000430.957783  | 188.488  |
| ENSGALT0000 \N                      | ENSGALG0000000430.893792  | 247.494  |
| ENSGALT0000 \N                      | ENSGALG0000000440.953547  | 148.964  |
| ENSGALT0000 Uncharacterized protein | ENSGALG000000044?         | 0        |
| ENSGALT0000 Uncharacterized protein | ENSGALG0000000440.385204  | 0.5      |
| ENSGALT0000 Uncharacterized protein | ENSGALG0000000440.945146  | 508.5    |
| ENSGALT0000 Uncharacterized protein | ENSGALG0000000440.464758  | 0        |
| ENSGALT0000 \N                      | ENSGALG000000045?         | 0        |
| ENSGALT0000 Uncharacterized protein | ENSGALG0000000450.942077  | 398      |
| ENSGALT0000 Uncharacterized protein | ENSGALG0000000460.879527  | 663.853  |
| ENSGALT0000 Uncharacterized protein | ENSGALG0000000460.94332   | 132      |
| ENSGALT0000 \N                      | ENSGALG0000000460.155972  | 40.6722  |
| ENSGALT0000 \N                      | ENSGALG0000000460.971837  | 101      |
| ENSGALT0000 Uncharacterized protein | ENSGALG0000000460.969168  | 132.5    |
| ENSGALT0000 Uncharacterized protein | ENSGALG0000000460.813016  | 3.5      |
| ENSGALT0000 Uncharacterized protein | ENSGALG0000000460.673888  | 18       |
| ENSGALT0000 Uncharacterized protein | ENSGALG0000000470.258556  | 12.5     |
| ENSGALT0000 Uncharacterized protein | ENSGALG0000000470.91809   | 497      |
| ENSGALT0000 Uncharacterized protein | ENSGALG0000000470.806341  | 98       |
| ENSGALT0000 Uncharacterized protein | ENSGALG0000000470.934058  | 9.7384   |
| ENSGALT0000 Uncharacterized protein | ENSGALG0000000470.805033  | 1        |
| ENSGALT0000 Uncharacterized protein | ENSGALG0000000470.866995  | 5.5      |
| ENSGALT0000 Uncharacterized protein | ENSGALG0000000470.990163  | 30.5     |
| ENSGALT0000 Uncharacterized protein | ENSGALG0000000470.969329  | 13       |
| ENSGALT0000 Uncharacterized protein | ENSGALG0000000470.793556  | 249.919  |
| ENSGALT0000 Uncharacterized protein | ENSGALG0000000470.985088  | 205      |
| ENSGALT0000 Uncharacterized protein | ENSGALG0000000470.79915   | 2        |
| ENSGALT0000 \N                      | ENSGALG0000000470.950081  | 205.5    |
| ENSGALT0000 Uncharacterized protein | ENSGALG0000000480.971651  | 43.5     |
| ENSGALT0000 Uncharacterized protein | ENSGALG0000000480.979977  | 31       |
| ENSGALT0000 Uncharacterized protein | ENSGALG0000000480.969281  | 1303.92  |
| ENSGALT0000 Uncharacterized protein | ENSGALG0000000490.746947  | 47.4676  |
| ENSGALT0000 Uncharacterized protein | ENSGALG0000000490.976135  | 64       |
| ENSGALT0000 Uncharacterized protein | ENSGALG0000000490.905149  | 41.5     |
| ENSGALT0000 \N                      | ENSGALG0000000490.0107728 | 1.12E-05 |
| ENSGALT0000 \N                      | ENSGALG0000000490.987928  | 2183     |
| ENSGALT0000 \N                      | ENSGALG0000000490.349348  | 116.702  |
| ENSGALT0000 Uncharacterized protein | ENSGALG0000000500.603682  | 0.5      |
| ENSGALT0000 Uncharacterized protein | ENSGALG0000000500.942485  | 46.4603  |
| ENSGALT0000 Uncharacterized protein | ENSGALG0000000500.975057  | 28       |



|                                              |                           |         |
|----------------------------------------------|---------------------------|---------|
| ENSGALT0000 Uncharacterized protein          | ENSGALG000000059 0.945249 | 3.5     |
| ENSGALT0000 Uncharacterized protein          | ENSGALG000000059 0.962392 | 13      |
| ENSGALT0000 \N                               | ENSGALG000000059 0.932599 | 2       |
| ENSGALT0000 Uncharacterized protein          | ENSGALG000000059 0.615753 | 0.5     |
| ENSGALT0000 \N                               | ENSGALG000000059 0.938745 | 3521    |
| ENSGALT0000 \N                               | ENSGALG000000059 0.972836 | 1057.5  |
| ENSGALT0000 Uncharacterized protein          | ENSGALG000000060 0.961812 | 1359.51 |
| ENSGALT0000 Uncharacterized protein          | ENSGALG000000060 0.562993 | 1.5     |
| ENSGALT0000 Uncharacterized protein          | ENSGALG000000060 0.95694  | 917.951 |
| ENSGALT0000 Uncharacterized protein          | ENSGALG000000060 0.786293 | 9.5     |
| ENSGALT0000 Uncharacterized protein          | ENSGALG000000060 0.743366 | 16.5    |
| ENSGALT0000 Uncharacterized protein          | ENSGALG000000060 0.818488 | 1.5     |
| ENSGALT0000 Uncharacterized protein          | ENSGALG000000061 ?        | 0       |
| ENSGALT0000 Uncharacterized protein          | ENSGALG000000061 0.969139 | 340.5   |
| ENSGALT0000 Uncharacterized protein          | ENSGALG000000061 0.954373 | 171.777 |
| ENSGALT0000 Uncharacterized protein          | ENSGALG000000061 ?        | 0       |
| ENSGALT0000 \N                               | ENSGALG000000061 0.983544 | 231     |
| ENSGALT0000 Uncharacterized protein          | ENSGALG000000061 ?        | 0       |
| ENSGALT0000 Uncharacterized protein          | ENSGALG000000061 0.940346 | 137     |
| ENSGALT0000 Uncharacterized protein          | ENSGALG000000061 0.853815 | 3       |
| ENSGALT0000 Uncharacterized protein          | ENSGALG000000062 0.938594 | 215     |
| ENSGALT0000 Uncharacterized protein          | ENSGALG000000062 0.855394 | 11      |
| ENSGALT0000 Uncharacterized protein          | ENSGALG000000062 0.942519 | 2131.5  |
| ENSGALT0000 \N                               | ENSGALG000000062 0.37837  | 0       |
| ENSGALT0000 Uncharacterized protein          | ENSGALG000000062 0.985786 | 399.5   |
| ENSGALT0000 Uncharacterized protein          | ENSGALG000000062 0.843394 | 2.5     |
| ENSGALT0000 \N                               | ENSGALG000000062 0.955569 | 135.187 |
| ENSGALT0000 \N                               | ENSGALG000000062 0.999478 | 17      |
| ENSGALT0000 Uncharacterized protein          | ENSGALG000000062 0.9281   | 48      |
| ENSGALT0000 Uncharacterized protein          | ENSGALG000000062 ?        | 0       |
| ENSGALT0000 EAV elementUncharacterized prote | ENSGALG000000062 ?        | 0       |
| ENSGALT0000 Uncharacterized protein          | ENSGALG000000063 0.5605   | 67      |
| ENSGALT0000 Uncharacterized protein          | ENSGALG000000063 0.656052 | 28      |
| ENSGALT0000 Uncharacterized protein          | ENSGALG000000063 0.990907 | 444.997 |
| ENSGALT0000 Uncharacterized protein          | ENSGALG000000063 0.985838 | 1562.5  |
| ENSGALT0000 Uncharacterized protein          | ENSGALG000000063 0.93105  | 2       |
| ENSGALT0000 Uncharacterized protein          | ENSGALG000000063 0.361381 | 0.5     |
| ENSGALT0000 \N                               | ENSGALG000000064 0.963884 | 546.353 |
| ENSGALT0000 Uncharacterized protein          | ENSGALG000000064 0.934416 | 150.5   |
| ENSGALT0000 Uncharacterized protein          | ENSGALG000000064 0.464758 | 0       |
| ENSGALT0000 Uncharacterized protein          | ENSGALG000000065 0.464758 | 1       |
| ENSGALT0000 \N                               | ENSGALG000000065 0.988954 | 689.65  |
| ENSGALT0000 Uncharacterized protein          | ENSGALG000000065 0.992666 | 146.47  |
| ENSGALT0000 Uncharacterized protein          | ENSGALG000000065 0.464758 | 1.5     |
| ENSGALT0000 Uncharacterized protein          | ENSGALG000000065 0.853815 | 1       |
| ENSGALT0000 Uncharacterized protein          | ENSGALG000000065 0.968561 | 162     |
| ENSGALT0000 Uncharacterized protein          | ENSGALG000000065 0.992081 | 1352.5  |
| ENSGALT0000 \N                               | ENSGALG000000065 0.575468 | 3.2504  |
| ENSGALT0000 Uncharacterized protein          | ENSGALG000000066 0.462222 | 4.20228 |
| ENSGALT0000 Uncharacterized protein          | ENSGALG000000066 0.464758 | 0       |
| ENSGALT0000 Uncharacterized protein          | ENSGALG000000066 0.414531 | 437     |
| ENSGALT0000 Uncharacterized protein          | ENSGALG000000066 0.540359 | 5       |
| ENSGALT0000 Uncharacterized protein          | ENSGALG000000066 0.972384 | 105     |
| ENSGALT0000 Uncharacterized protein          | ENSGALG000000067 0.970752 | 187     |
| ENSGALT0000 \N                               | ENSGALG000000067 0.919677 | 30      |
| ENSGALT0000 Uncharacterized protein          | ENSGALG000000067 0.66061  | 6.5     |

|                                     |                            |         |
|-------------------------------------|----------------------------|---------|
| ENSGALT0000 Uncharacterized protein | ENSGALG000000067 0.800075  | 36      |
| ENSGALT0000 \N                      | ENSGALG000000067 0.579551  | 0.5     |
| ENSGALT0000 Uncharacterized protein | ENSGALG000000068 0.951675  | 247.5   |
| ENSGALT0000 Uncharacterized protein | ENSGALG000000068 0.841984  | 8       |
| ENSGALT0000 Uncharacterized protein | ENSGALG000000068 0.918141  | 560.581 |
| ENSGALT0000 Uncharacterized protein | ENSGALG000000068 0.919876  | 417.499 |
| ENSGALT0000 Uncharacterized protein | ENSGALG000000068 0.876429  | 792.5   |
| ENSGALT0000 Uncharacterized protein | ENSGALG000000068 0.603229  | 4778.08 |
| ENSGALT0000 \N                      | ENSGALG000000069 0.991113  | 141.5   |
| ENSGALT0000 \N                      | ENSGALG000000069 0.600193  | 2.66917 |
| ENSGALT0000 Uncharacterized protein | ENSGALG000000069 ?         | 0       |
| ENSGALT0000 Uncharacterized protein | ENSGALG000000069 0.995257  | 127     |
| ENSGALT0000 Uncharacterized protein | ENSGALG000000069 0.984827  | 327     |
| ENSGALT0000 Uncharacterized protein | ENSGALG000000069 0.464758  | 0       |
| ENSGALT0000 Uncharacterized protein | ENSGALG000000069 0.898356  | 0.5     |
| ENSGALT0000 Uncharacterized protein | ENSGALG000000069 0.61307   | 4       |
| ENSGALT0000 \N                      | ENSGALG000000069 0.968787  | 202.651 |
| ENSGALT0000 Uncharacterized protein | ENSGALG000000069 0.41155   | 43.5    |
| ENSGALT0000 Uncharacterized protein | ENSGALG000000070 0.494106  | 1.5     |
| ENSGALT0000 Uncharacterized protein | ENSGALG000000070 0.669136  | 18.5    |
| ENSGALT0000 Uncharacterized protein | ENSGALG000000070 0.980644  | 304.5   |
| ENSGALT0000 Uncharacterized protein | ENSGALG000000070 0.464758  | 1       |
| ENSGALT0000 Uncharacterized protein | ENSGALG000000070 0.464758  | 0       |
| ENSGALT0000 Uncharacterized protein | ENSGALG000000070 0.980437  | 17      |
| ENSGALT0000 \N                      | ENSGALG000000070 0.991526  | 402.5   |
| ENSGALT0000 Uncharacterized protein | ENSGALG000000070 0.876256  | 355.5   |
| ENSGALT0000 Uncharacterized protein | ENSGALG000000070 0.886657  | 350.5   |
| ENSGALT0000 \N                      | ENSGALG000000070 0.577785  | 16.1209 |
| ENSGALT0000 \N                      | ENSGALG000000070 0.971582  | 97.6787 |
| ENSGALT0000 Uncharacterized protein | ENSGALG000000071 0.862425  | 1       |
| ENSGALT0000 Uncharacterized protein | ENSGALG000000071 0.672916  | 45      |
| ENSGALT0000 Uncharacterized protein | ENSGALG000000071 0.942624  | 6.24141 |
| ENSGALT0000 Uncharacterized protein | ENSGALG000000071 0.854189  | 9.5     |
| ENSGALT0000 Uncharacterized protein | ENSGALG000000071 0.97441   | 83.5    |
| ENSGALT0000 Uncharacterized protein | ENSGALG000000071 0.526834  | 11259.1 |
| ENSGALT0000 Uncharacterized protein | ENSGALG000000071 0.995122  | 76.6508 |
| ENSGALT0000 Uncharacterized protein | ENSGALG000000072 0.857325  | 225.5   |
| ENSGALT0000 Uncharacterized protein | ENSGALG000000072 0.922322  | 35.5    |
| ENSGALT0000 Uncharacterized protein | ENSGALG000000072 0.99887   | 161.5   |
| ENSGALT0000 Uncharacterized protein | ENSGALG000000072 1         | 5       |
| ENSGALT0000 Uncharacterized protein | ENSGALG000000072 0.882589  | 367     |
| ENSGALT0000 Uncharacterized protein | ENSGALG000000072 0.7999    | 1.5     |
| ENSGALT0000 Uncharacterized protein | ENSGALG000000072 0.93642   | 118.5   |
| ENSGALT0000 \N                      | ENSGALG000000072 0.464758  | 0       |
| ENSGALT0000 Uncharacterized protein | ENSGALG000000072 0.603682  | 0.5     |
| ENSGALT0000 Uncharacterized protein | ENSGALG000000072 0.855325  | 341     |
| ENSGALT0000 Uncharacterized protein | ENSGALG000000073 0.946504  | 3       |
| ENSGALT0000 Uncharacterized protein | ENSGALG000000074 ?         | 0       |
| ENSGALT0000 Uncharacterized protein | ENSGALG000000074 0.754728  | 0.5     |
| ENSGALT0000 Uncharacterized protein | ENSGALG000000074 0.976665  | 140.862 |
| ENSGALT0000 Uncharacterized protein | ENSGALG000000074 0.0964621 | 236.902 |
| ENSGALT0000 \N                      | ENSGALG000000074 0.84671   | 5.5     |
| ENSGALT0000 Uncharacterized protein | ENSGALG000000074 0.788121  | 9.40202 |
| ENSGALT0000 \N                      | ENSGALG000000074 0.512802  | 48      |
| ENSGALT0000 Uncharacterized protein | ENSGALG000000075 0.842903  | 9       |
| ENSGALT0000 Uncharacterized protein | ENSGALG000000075 0.810568  | 5.5     |



|                                          |                            |          |
|------------------------------------------|----------------------------|----------|
| ENSGALT0000 Uncharacterized protein      | ENSGALG000000075 0.932279  | 54       |
| ENSGALT0000 Uncharacterized protein      | ENSGALG000000075 ?         | 0        |
| ENSGALT0000 Uncharacterized protein      | ENSGALG000000075 0.982817  | 224      |
| ENSGALT0000 Uncharacterized protein      | ENSGALG000000075 0.631223  | 3        |
| ENSGALT0000 Uncharacterized protein      | ENSGALG000000075 0.957357  | 1533.5   |
| ENSGALT0000 \N                           | ENSGALG000000075 0.621113  | 149      |
| ENSGALT0000 \N                           | ENSGALG000000075 0.77774   | 307.5    |
| ENSGALT0000 Uncharacterized protein      | ENSGALG000000075 0.921923  | 275.5    |
| ENSGALT0000 ENS-2Uncharacterized protein | ENSGALG000000075 ?         | 0        |
| ENSGALT0000 Uncharacterized protein      | ENSGALG000000076 0.991431  | 378      |
| ENSGALT0000 \N                           | ENSGALG000000076 0.532902  | 1.14E-06 |
| ENSGALT0000 Uncharacterized protein      | ENSGALG000000076 0.977304  | 308      |
| ENSGALT0000 Uncharacterized protein      | ENSGALG000000076 ?         | 0        |
| ENSGALT0000 Uncharacterized protein      | ENSGALG000000076 0.733142  | 5        |
| ENSGALT0000 Uncharacterized protein      | ENSGALG000000076 0.945594  | 15.5     |
| ENSGALT0000 Uncharacterized protein      | ENSGALG000000076 0.790158  | 187.5    |
| ENSGALT0000 Uncharacterized protein      | ENSGALG000000076 0.729254  | 12       |
| ENSGALT0000 Uncharacterized protein      | ENSGALG000000076 0.832377  | 178      |
| ENSGALT0000 Uncharacterized protein      | ENSGALG000000076 0.887884  | 5369     |
| ENSGALT0000 Uncharacterized protein      | ENSGALG000000076 0.603682  | 0        |
| ENSGALT0000 Uncharacterized protein      | ENSGALG000000076 0.801236  | 3        |
| ENSGALT0000 Uncharacterized protein      | ENSGALG000000077 0.464758  | 0        |
| ENSGALT0000 Uncharacterized protein      | ENSGALG000000077 0.985038  | 2.5      |
| ENSGALT0000 \N                           | ENSGALG000000077 0.566734  | 1.17234  |
| ENSGALT0000 Uncharacterized protein      | ENSGALG000000077 0.196173  | 20515.5  |
| ENSGALT0000 Uncharacterized protein      | ENSGALG000000077 ?         | 0        |
| ENSGALT0000 Uncharacterized protein      | ENSGALG000000077 0.660369  | 17.4736  |
| ENSGALT0000 Uncharacterized protein      | ENSGALG000000078 0.603682  | 0.5      |
| ENSGALT0000 Uncharacterized protein      | ENSGALG000000078 ?         | 0        |
| ENSGALT0000 Olfactory receptor OR9       | ENSGALG000000078 0.464758  | 3.83E-25 |
| ENSGALT0000 Uncharacterized protein      | ENSGALG000000078 0.971557  | 76.5     |
| ENSGALT0000 Uncharacterized protein      | ENSGALG000000078 0.898919  | 111      |
| ENSGALT0000 Uncharacterized protein      | ENSGALG000000078 0.852892  | 2113     |
| ENSGALT0000 Uncharacterized protein      | ENSGALG000000078 0.512308  | 7.5      |
| ENSGALT0000 \N                           | ENSGALG000000079 0.754728  | 0.5      |
| ENSGALT0000 Uncharacterized protein      | ENSGALG000000079 0.951569  | 230      |
| ENSGALT0000 Uncharacterized protein      | ENSGALG000000079 0.878467  | 25.2306  |
| ENSGALT0000 Uncharacterized protein      | ENSGALG000000079 0.603682  | 1        |
| ENSGALT0000 Uncharacterized protein      | ENSGALG000000080 0.926619  | 7.5      |
| ENSGALT0000 Uncharacterized protein      | ENSGALG000000080 0.886158  | 2173.42  |
| ENSGALT0000 Uncharacterized protein      | ENSGALG000000080 0.932599  | 1.5      |
| ENSGALT0000 Uncharacterized protein      | ENSGALG000000080 0.763132  | 3.5      |
| ENSGALT0000 \N                           | ENSGALG000000080 0.0539949 | 0        |
| ENSGALT0000 \N                           | ENSGALG000000080 0.967913  | 2.98287  |
| ENSGALT0000 Uncharacterized protein      | ENSGALG000000080 0.776616  | 3        |
| ENSGALT0000 Uncharacterized protein      | ENSGALG000000080 0.491069  | 110      |
| ENSGALT0000 Uncharacterized protein      | ENSGALG0000000810 0.537057 | 2.5      |
| ENSGALT0000 Uncharacterized protein      | ENSGALG0000000810 0.928162 | 666.5    |
| ENSGALT0000 \N                           | ENSGALG0000000810 0.585621 | 136.5    |
| ENSGALT0000 \N                           | ENSGALG0000000810 0.94946  | 3118.1   |
| ENSGALT0000 Uncharacterized protein      | ENSGALG000000081 ?         | 0        |
| ENSGALT0000 Uncharacterized protein      | ENSGALG0000000810 0.971943 | 48.5     |
| ENSGALT0000 Uncharacterized protein      | ENSGALG0000000810 0.995392 | 601.499  |
| ENSGALT0000 \N                           | ENSGALG000000082 ?         | 0        |
| ENSGALT0000 \N                           | ENSGALG000000082 0.950044  | 296.616  |
| ENSGALT0000 Uncharacterized protein      | ENSGALG000000082 0.880941  | 2.5      |

|                                              |                           |         |
|----------------------------------------------|---------------------------|---------|
| ENSGALT0000 Uncharacterized protein          | ENSGALG000000082 0.977747 | 61.5    |
| ENSGALT0000 \N                               | ENSGALG000000082 0.7602   | 83.5    |
| ENSGALT0000 Uncharacterized protein          | ENSGALG000000082 ?        | 0       |
| ENSGALT0000 Uncharacterized protein          | ENSGALG000000082 0.895306 | 1115.5  |
| ENSGALT0000 Uncharacterized protein          | ENSGALG000000083 0.948663 | 1177.5  |
| ENSGALT0000 Uncharacterized protein          | ENSGALG000000083 0.967168 | 30      |
| ENSGALT0000 Uncharacterized protein          | ENSGALG000000083 0.764084 | 28      |
| ENSGALT0000 \N                               | ENSGALG000000083 0.566051 | 0.04082 |
| ENSGALT0000 Uncharacterized protein          | ENSGALG000000083 0.950793 | 485.5   |
| ENSGALT0000 Uncharacterized protein          | ENSGALG000000083 0.464758 | 0.5     |
| ENSGALT0000 Uncharacterized protein          | ENSGALG000000083 0.859674 | 153.551 |
| ENSGALT0000 \N                               | ENSGALG000000084 0.978456 | 341.344 |
| ENSGALT0000 Uncharacterized protein          | ENSGALG000000084 0.983801 | 281     |
| ENSGALT0000 Uncharacterized protein          | ENSGALG000000084 0.57818  | 2.92306 |
| ENSGALT0000 Uncharacterized protein          | ENSGALG000000084 0.937307 | 37.4186 |
| ENSGALT0000 Uncharacterized protein          | ENSGALG000000085 0.96137  | 66      |
| ENSGALT0000 Uncharacterized protein          | ENSGALG000000085 0.952246 | 13.5    |
| ENSGALT0000 \N                               | ENSGALG000000085 0.631537 | 911     |
| ENSGALT0000 Uncharacterized protein          | ENSGALG000000085 0.97936  | 365.429 |
| ENSGALT0000 Uncharacterized protein          | ENSGALG000000085 0.613302 | 3       |
| ENSGALT0000 Uncharacterized protein          | ENSGALG000000085 0.998891 | 24.5    |
| ENSGALT0000 Uncharacterized protein          | ENSGALG000000086 0.983288 | 184     |
| ENSGALT0000 Uncharacterized protein          | ENSGALG000000086 0.872927 | 142.5   |
| ENSGALT0000 Uncharacterized protein          | ENSGALG000000086 0.848447 | 7       |
| ENSGALT0000 \N                               | ENSGALG000000086 0.962048 | 112.304 |
| ENSGALT0000 \N                               | ENSGALG000000086 0.992086 | 922.686 |
| ENSGALT0000 Uncharacterized protein          | ENSGALG000000086 0.80945  | 173     |
| ENSGALT0000 Uncharacterized protein          | ENSGALG000000086 0.767554 | 14.5    |
| ENSGALT0000 Uncharacterized protein          | ENSGALG000000086 0.875379 | 79      |
| ENSGALT0000 Uncharacterized protein          | ENSGALG000000087 ?        | 0       |
| ENSGALT0000 POL-like Uncharacterized protein | ENSGALG000000087 ?        | 0       |
| ENSGALT0000 Uncharacterized protein          | ENSGALG000000087 0.966265 | 91      |
| ENSGALT0000 Uncharacterized protein          | ENSGALG000000087 0.719324 | 6       |
| ENSGALT0000 Uncharacterized protein          | ENSGALG000000087 ?        | 0       |
| ENSGALT0000 \N                               | ENSGALG000000087 0.304848 | 23056.5 |
| ENSGALT0000 Uncharacterized protein          | ENSGALG000000087 0.696071 | 1601.5  |
| ENSGALT0000 Uncharacterized protein          | ENSGALG000000088 0.99381  | 353.5   |
| ENSGALT0000 Uncharacterized protein          | ENSGALG000000088 0.791983 | 9       |
| ENSGALT0000 Uncharacterized protein          | ENSGALG000000088 0.650932 | 4       |
| ENSGALT0000 \N                               | ENSGALG000000088 0.907715 | 988.5   |
| ENSGALT0000 Uncharacterized protein          | ENSGALG000000088 0.968728 | 5.5     |
| ENSGALT0000 \N                               | ENSGALG000000088 0.689726 | 240     |
| ENSGALT0000 Uncharacterized protein          | ENSGALG000000088 0.962383 | 43      |
| ENSGALT0000 \N                               | ENSGALG000000088 0.976042 | 277.571 |
| ENSGALT0000 Uncharacterized protein          | ENSGALG000000089 0.173997 | 198.954 |
| ENSGALT0000 Uncharacterized protein          | ENSGALG000000089 0.722096 | 0.5     |
| ENSGALT0000 Uncharacterized protein          | ENSGALG000000089 ?        | 0       |
| ENSGALT0000 Uncharacterized protein          | ENSGALG000000089 0.56484  | 14      |
| ENSGALT0000 Uncharacterized protein          | ENSGALG000000090 0.942971 | 44      |
| ENSGALT0000 Uncharacterized protein          | ENSGALG000000090 0.819063 | 2       |
| ENSGALT0000 Uncharacterized protein          | ENSGALG000000090 0.774504 | 15.5    |
| ENSGALT0000 Uncharacterized protein          | ENSGALG000000090 0.904804 | 4       |
| ENSGALT0000 Uncharacterized protein          | ENSGALG000000090 0.886079 | 12      |
| ENSGALT0000 \N                               | ENSGALG000000090 0.894183 | 229.944 |
| ENSGALT0000 Uncharacterized protein          | ENSGALG000000090 0.464758 | 0       |
| ENSGALT0000 Uncharacterized protein          | ENSGALG000000090 0.850446 | 55      |

|                                     |                   |          |          |
|-------------------------------------|-------------------|----------|----------|
| ENSGALT0000 Uncharacterized protein | ENSGALG000000090  | 0.971221 | 395.5    |
| ENSGALT0000 \N                      | ENSGALG0000000910 | 0.984519 | 41.5     |
| ENSGALT0000 Uncharacterized protein | ENSGALG0000000910 | 0.991214 | 370      |
| ENSGALT0000 \N                      | ENSGALG000000091? |          | 0        |
| ENSGALT0000 \N                      | ENSGALG000000091? |          | 0        |
| ENSGALT0000 \N                      | ENSGALG000000091? |          | 0        |
| ENSGALT0000 PIT 54 protein          | ENSGALG0000000910 | 0.539038 | 2        |
| ENSGALT0000 Uncharacterized protein | ENSGALG0000000910 | 0.987944 | 59.5     |
| ENSGALT0000 Uncharacterized protein | ENSGALG0000000910 | 0.65134  | 46.5     |
| ENSGALT0000 Uncharacterized protein | ENSGALG0000000910 | 0.860759 | 640      |
| ENSGALT0000 \N                      | ENSGALG000000091? |          | 0        |
| ENSGALT0000 \N                      | ENSGALG0000000910 | 0.709664 | 1        |
| ENSGALT0000 \N                      | ENSGALG0000000910 | 0.649519 | 0        |
| ENSGALT0000 \N                      | ENSGALG0000000910 | 0.464758 | 0        |
| ENSGALT0000 Uncharacterized protein | ENSGALG0000000910 | 0.976927 | 365      |
| ENSGALT0000 Uncharacterized protein | ENSGALG0000000910 | 0.464758 | 0        |
| ENSGALT0000 \N                      | ENSGALG0000000910 | 0.464758 | 1.98E-11 |
| ENSGALT0000 \N                      | ENSGALG0000000910 | 0.315288 | 0        |
| ENSGALT0000 \N                      | ENSGALG0000000910 | 0.464758 | 0        |
| ENSGALT0000 Uncharacterized protein | ENSGALG000000092  | 0.887156 | 434.501  |
| ENSGALT0000 Uncharacterized protein | ENSGALG000000092  | 0.867167 | 76       |
| ENSGALT0000 Uncharacterized protein | ENSGALG000000092? |          | 0        |
| ENSGALT0000 \N                      | ENSGALG000000092  | 0.970387 | 721      |
| ENSGALT0000 \N                      | ENSGALG000000092  | 0.631223 | 0        |
| ENSGALT0000 Uncharacterized protein | ENSGALG000000092  | 0.990746 | 38.5     |
| ENSGALT0000 Uncharacterized protein | ENSGALG000000092  | 0.732556 | 3.5477   |
| ENSGALT0000 Uncharacterized protein | ENSGALG000000092  | 0.962253 | 246      |
| ENSGALT0000 Uncharacterized protein | ENSGALG000000092  | 0.917726 | 185      |
| ENSGALT0000 Uncharacterized protein | ENSGALG000000093  | 0.946515 | 45.5     |
| ENSGALT0000 Uncharacterized protein | ENSGALG000000093  | 0.725097 | 2        |
| ENSGALT0000 \N                      | ENSGALG000000093  | 0.898977 | 130.067  |
| ENSGALT0000 Uncharacterized protein | ENSGALG000000093  | 0.916017 | 26       |
| ENSGALT0000 \N                      | ENSGALG000000093  | 0.675022 | 0.9997   |
| ENSGALT0000 Uncharacterized protein | ENSGALG000000094  | 0.665746 | 899.5    |
| ENSGALT0000 Uncharacterized protein | ENSGALG000000094  | 0.978515 | 6154.5   |
| ENSGALT0000 \N                      | ENSGALG000000094? |          | 0        |
| ENSGALT0000 Uncharacterized protein | ENSGALG000000094  | 0.99267  | 14.5     |
| ENSGALT0000 Uncharacterized protein | ENSGALG000000094  | 0.603682 | 0        |
| ENSGALT0000 Uncharacterized protein | ENSGALG000000094  | 0.739378 | 2        |
| ENSGALT0000 Uncharacterized protein | ENSGALG000000094  | 0.604488 | 0.5      |
| ENSGALT0000 Uncharacterized protein | ENSGALG000000095  | 0.959979 | 80       |
| ENSGALT0000 Uncharacterized protein | ENSGALG000000095  | 0.975    | 159.51   |
| ENSGALT0000 Uncharacterized protein | ENSGALG000000095  | 0.975997 | 249      |
| ENSGALT0000 Uncharacterized protein | ENSGALG000000095  | 0.927291 | 3.5      |
| ENSGALT0000 \N                      | ENSGALG000000095  | 0.464758 | 0        |
| ENSGALT0000 Uncharacterized protein | ENSGALG000000095? |          | 0        |
| ENSGALT0000 Uncharacterized protein | ENSGALG000000096  | 0.924961 | 132      |
| ENSGALT0000 Uncharacterized protein | ENSGALG000000096  | 0.894185 | 7        |
| ENSGALT0000 \N                      | ENSGALG000000096  | 0.464758 | 0        |
| ENSGALT0000 Uncharacterized protein | ENSGALG000000096  | 0.639659 | 3.5      |
| ENSGALT0000 Uncharacterized protein | ENSGALG000000096  | 0.794125 | 3        |
| ENSGALT0000 Uncharacterized protein | ENSGALG000000096  | 0.464758 | 0        |
| ENSGALT0000 Uncharacterized protein | ENSGALG000000096  | 0.649519 | 0.5      |
| ENSGALT0000 Uncharacterized protein | ENSGALG000000096  | 0.95134  | 417      |
| ENSGALT0000 Uncharacterized protein | ENSGALG000000096  | 0.464758 | 0.5      |
| ENSGALT0000 Uncharacterized protein | ENSGALG000000096  | 0.989183 | 192.5    |

|                                     |                           |          |
|-------------------------------------|---------------------------|----------|
| ENSGALT0000 \N                      | ENSGALG0000000970.894692  | 963.404  |
| ENSGALT0000 Uncharacterized protein | ENSGALG000000097 ?        | 0        |
| ENSGALT0000 Uncharacterized protein | ENSGALG0000000970.926476  | 1097.86  |
| ENSGALT0000 Uncharacterized protein | ENSGALG0000000970.948878  | 94       |
| ENSGALT0000 Uncharacterized protein | ENSGALG000000097 ?        | 0        |
| ENSGALT0000 Uncharacterized protein | ENSGALG000000098 0.892756 | 519      |
| ENSGALT0000 Uncharacterized protein | ENSGALG000000098 0.778348 | 2.5      |
| ENSGALT0000 Uncharacterized protein | ENSGALG000000098 0.751952 | 233      |
| ENSGALT0000 \N                      | ENSGALG000000098 0.71008  | 3.42227  |
| ENSGALT0000 Uncharacterized protein | ENSGALG000000099 0.898507 | 34       |
| ENSGALT0000 Uncharacterized protein | ENSGALG000000099 0.966127 | 8.5      |
| ENSGALT0000 Uncharacterized protein | ENSGALG000000099 0.90728  | 2.5      |
| ENSGALT0000 Uncharacterized protein | ENSGALG000000099 0.90747  | 201      |
| ENSGALT0000 Uncharacterized protein | ENSGALG000000099 0.940731 | 536      |
| ENSGALT0000 Uncharacterized protein | ENSGALG000000099 0.464758 | 2.17E-25 |
| ENSGALT0000 Uncharacterized protein | ENSGALG000000099 0.893692 | 279.5    |
| ENSGALT0000 Uncharacterized protein | ENSGALG000000100 ?        | 0        |
| ENSGALT0000 \N                      | ENSGALG000000100 0.989521 | 548      |
| ENSGALT0000 Uncharacterized protein | ENSGALG000000100 0.902063 | 50.4974  |
| ENSGALT0000 Uncharacterized protein | ENSGALG0000001010.534404  | 2        |
| ENSGALT0000 Uncharacterized protein | ENSGALG000000101 ?        | 0        |
| ENSGALT0000 Uncharacterized protein | ENSGALG0000001010.809509  | 297.5    |
| ENSGALT0000 Uncharacterized protein | ENSGALG0000001010.662104  | 0.5      |
| ENSGALT0000 Uncharacterized protein | ENSGALG000000102 0.987675 | 199      |
| ENSGALT0000 Uncharacterized protein | ENSGALG000000102 0.603682 | 0        |
| ENSGALT0000 Uncharacterized protein | ENSGALG000000102 0.679696 | 0.42108  |
| ENSGALT0000 Uncharacterized protein | ENSGALG000000102 0.819378 | 11       |
| ENSGALT0000 Uncharacterized protein | ENSGALG000000102 0.895708 | 2.5      |
| ENSGALT0000 \N                      | ENSGALG000000102 0.789107 | 69.5     |
| ENSGALT0000 \N                      | ENSGALG000000102 0.559282 | 9.81149  |
| ENSGALT0000 \N                      | ENSGALG000000102 0.967042 | 475.434  |
| ENSGALT0000 Uncharacterized protein | ENSGALG000000102 0.962292 | 28.5     |
| ENSGALT0000 Uncharacterized protein | ENSGALG000000102 0.930576 | 14.5     |
| ENSGALT0000 Uncharacterized protein | ENSGALG000000103 0.649519 | 0.5      |
| ENSGALT0000 Uncharacterized protein | ENSGALG000000103 0.464758 | 0        |
| ENSGALT0000 Uncharacterized protein | ENSGALG000000103 0.704367 | 13       |
| ENSGALT0000 Uncharacterized protein | ENSGALG000000103 0.960529 | 112      |
| ENSGALT0000 Uncharacterized protein | ENSGALG000000103 0.76033  | 4.5      |
| ENSGALT0000 Uncharacterized protein | ENSGALG000000104 0.909016 | 290.5    |
| ENSGALT0000 \N                      | ENSGALG000000104 0.994641 | 209.839  |
| ENSGALT0000 Uncharacterized protein | ENSGALG000000104 0.464758 | 1        |
| ENSGALT0000 \N                      | ENSGALG000000105 0.967318 | 237      |
| ENSGALT0000 \N                      | ENSGALG000000105 0.539616 | 2.16253  |
| ENSGALT0000 Uncharacterized protein | ENSGALG000000105 0.94258  | 41.5     |
| ENSGALT0000 Uncharacterized protein | ENSGALG000000105 0.976616 | 15       |
| ENSGALT0000 \N                      | ENSGALG000000105 0.96683  | 476      |
| ENSGALT0000 Uncharacterized protein | ENSGALG000000105 0.649519 | 0.5      |
| ENSGALT0000 Uncharacterized protein | ENSGALG000000106 0.586338 | 32       |
| ENSGALT0000 Uncharacterized protein | ENSGALG000000106 0.91497  | 6        |
| ENSGALT0000 \N                      | ENSGALG000000106 ?        | 0        |
| ENSGALT0000 Uncharacterized protein | ENSGALG000000106 0.877941 | 2208     |
| ENSGALT0000 Uncharacterized protein | ENSGALG000000106 0.901191 | 38       |
| ENSGALT0000 \N                      | ENSGALG000000107 0.860909 | 353.5    |
| ENSGALT0000 Uncharacterized protein | ENSGALG000000107 0.49274  | 79.5     |
| ENSGALT0000 Uncharacterized protein | ENSGALG000000107 ?        | 0        |
| ENSGALT0000 Uncharacterized protein | ENSGALG000000107 0.806167 | 1.5      |

|                                     |                             |         |
|-------------------------------------|-----------------------------|---------|
| ENSGALT0000 Uncharacterized protein | ENSGALG000000107 0.649519   | 0       |
| ENSGALT0000 Uncharacterized protein | ENSGALG000000108 0.747669   | 5       |
| ENSGALT0000 \N                      | ENSGALG000000108 0.852759   | 3       |
| ENSGALT0000 Uncharacterized protein | ENSGALG000000108 0.928569   | 317.5   |
| ENSGALT0000 \N                      | ENSGALG000000108 0.00597175 | 12.4186 |
| ENSGALT0000 Uncharacterized protein | ENSGALG000000108 ?          | 0       |
| ENSGALT0000 \N                      | ENSGALG000000108 0.951584   | 214.764 |
| ENSGALT0000 \N                      | ENSGALG000000108 0.941596   | 471     |
| ENSGALT0000 Uncharacterized protein | ENSGALG000000109 0.821187   | 1.5     |
| ENSGALT0000 Uncharacterized protein | ENSGALG000000109 0.603682   | 1       |
| ENSGALT0000 \N                      | ENSGALG000000109 0.942642   | 222.007 |
| ENSGALT0000 Uncharacterized protein | ENSGALG000000109 0.482952   | 9.5     |
| ENSGALT0000 Uncharacterized protein | ENSGALG000000109 0.625472   | 0.66074 |
| ENSGALT0000 Uncharacterized protein | ENSGALG000000109 0.977671   | 245.15  |
| ENSGALT0000 Uncharacterized protein | ENSGALG000000109 0.464758   | 0       |
| ENSGALT0000 Uncharacterized protein | ENSGALG000000110 ?          | 0       |
| ENSGALT0000 Uncharacterized protein | ENSGALG000000110 0.996821   | 531     |
| ENSGALT0000 \N                      | ENSGALG000000110 0.474387   | 230.363 |
| ENSGALT0000 Uncharacterized protein | ENSGALG000000110 0.869249   | 17.5    |
| ENSGALT0000 Uncharacterized protein | ENSGALG000000110 0.683568   | 236.065 |
| ENSGALT0000 Uncharacterized protein | ENSGALG000000110 0.887809   | 217     |
| ENSGALT0000 Uncharacterized protein | ENSGALG000000110 ?          | 0       |
| ENSGALT0000 Uncharacterized protein | ENSGALG000000110 ?          | 0       |
| ENSGALT0000 \N                      | ENSGALG000000110 0.684598   | 2.51541 |
| ENSGALT0000 Uncharacterized protein | ENSGALG000000111 ?          | 0       |
| ENSGALT0000 Uncharacterized protein | ENSGALG000000111 0.752143   | 3209    |
| ENSGALT0000 \N                      | ENSGALG000000111 0.888171   | 158     |
| ENSGALT0000 Uncharacterized protein | ENSGALG000000111 ?          | 0       |
| ENSGALT0000 Uncharacterized protein | ENSGALG000000111 0.755033   | 3054.5  |
| ENSGALT0000 Uncharacterized protein | ENSGALG000000111 0.774785   | 1979.5  |
| ENSGALT0000 Uncharacterized protein | ENSGALG000000111 0.302253   | 4.5     |
| ENSGALT0000 Uncharacterized protein | ENSGALG000000112 0.786806   | 2       |
| ENSGALT0000 Uncharacterized protein | ENSGALG000000112 0.916173   | 560     |
| ENSGALT0000 \N                      | ENSGALG000000112 0.981527   | 34      |
| ENSGALT0000 Uncharacterized protein | ENSGALG000000112 ?          | 0       |
| ENSGALT0000 Uncharacterized protein | ENSGALG000000112 0.861411   | 317.5   |
| ENSGALT0000 Uncharacterized protein | ENSGALG000000113 0.866371   | 1075.33 |
| ENSGALT0000 \N                      | ENSGALG000000113 0.977439   | 44.5    |
| ENSGALT0000 Uncharacterized protein | ENSGALG000000113 0.464758   | 0       |
| ENSGALT0000 Uncharacterized protein | ENSGALG000000113 0.790622   | 86      |
| ENSGALT0000 Uncharacterized protein | ENSGALG000000113 0.999442   | 177.672 |
| ENSGALT0000 \N                      | ENSGALG000000113 0.791327   | 78.5    |
| ENSGALT0000 \N                      | ENSGALG000000113 0.942148   | 320.9   |
| ENSGALT0000 Uncharacterized protein | ENSGALG000000114 0.464758   | 0       |
| ENSGALT0000 Uncharacterized protein | ENSGALG000000114 0.84238    | 1.10853 |
| ENSGALT0000 Uncharacterized protein | ENSGALG000000114 0.997298   | 1193    |
| ENSGALT0000 Uncharacterized protein | ENSGALG000000114 0.991829   | 53      |
| ENSGALT0000 Uncharacterized protein | ENSGALG000000115 0.0720044  | 1       |
| ENSGALT0000 \N                      | ENSGALG000000115 0.722032   | 1.31247 |
| ENSGALT0000 \N                      | ENSGALG000000115 0.549003   | 1.03657 |
| ENSGALT0000 Uncharacterized protein | ENSGALG000000115 ?          | 0       |
| ENSGALT0000 Uncharacterized protein | ENSGALG000000115 0.994841   | 5.5     |
| ENSGALT0000 \N                      | ENSGALG000000115 ?          | 0       |
| ENSGALT0000 Uncharacterized protein | ENSGALG000000116 0.998436   | 169     |
| ENSGALT0000 Uncharacterized protein | ENSGALG000000116 0.995646   | 1131.85 |
| ENSGALT0000 Uncharacterized protein | ENSGALG000000116 0.961287   | 2739    |

|                                                |                           |         |
|------------------------------------------------|---------------------------|---------|
| ENSGALT0000 \N                                 | ENSGALG000000116 0.464758 | 0       |
| ENSGALT0000 Uncharacterized protein            | ENSGALG000000116 0.958652 | 711     |
| ENSGALT0000 \N                                 | ENSGALG000000116 0.938718 | 1848.5  |
| ENSGALT0000 Uncharacterized protein            | ENSGALG000000116 0.943934 | 1       |
| ENSGALT0000 \N                                 | ENSGALG000000116 0.95458  | 482     |
| ENSGALT0000 Uncharacterized protein            | ENSGALG000000116 0.878116 | 37      |
| ENSGALT0000 Putative uncharacterized protein H | ENSGALG000000117 0.918168 | 337     |
| ENSGALT0000 Uncharacterized protein            | ENSGALG000000117 0.84015  | 2030.5  |
| ENSGALT0000 Uncharacterized protein            | ENSGALG000000118 0.725097 | 3       |
| ENSGALT0000 \N                                 | ENSGALG000000118 0.643987 | 5.82569 |
| ENSGALT0000 Uncharacterized protein            | ENSGALG000000118 0.818133 | 3.5     |
| ENSGALT0000 \N                                 | ENSGALG000000118 0.63728  | 757.5   |
| ENSGALT0000 Uncharacterized protein            | ENSGALG000000119 0.923619 | 187.5   |
| ENSGALT0000 \N                                 | ENSGALG000000119 0.945568 | 85.8801 |
| ENSGALT0000 Uncharacterized protein            | ENSGALG000000119 0.85286  | 266.5   |
| ENSGALT0000 Uncharacterized protein            | ENSGALG000000119 0.995137 | 161     |
| ENSGALT0000 Uncharacterized protein            | ENSGALG000000119 0.637298 | 34      |
| ENSGALT0000 Uncharacterized protein            | ENSGALG000000119 0.769478 | 7.5     |
| ENSGALT0000 Uncharacterized protein            | ENSGALG000000119 0.904804 | 1       |
| ENSGALT0000 Uncharacterized protein            | ENSGALG000000119 0.751733 | 2451.99 |
| ENSGALT0000 Fps proto-oncogene, 5' endUnchar   | ENSGALG000000120 0.464758 | 0       |
| ENSGALT0000 \N                                 | ENSGALG000000120 0.357897 | 0       |
| ENSGALT0000 Uncharacterized protein            | ENSGALG000000120 ?        | 0       |
| ENSGALT0000 Uncharacterized protein            | ENSGALG000000120 0.987012 | 881     |
| ENSGALT0000 Uncharacterized protein            | ENSGALG000000120 0.906169 | 39.5    |
| ENSGALT0000 Uncharacterized protein            | ENSGALG000000120 ?        | 0       |
| ENSGALT0000 \N                                 | ENSGALG000000121 0.769657 | 368.691 |
| ENSGALT0000 Uncharacterized protein            | ENSGALG000000121 0.659786 | 156     |
| ENSGALT0000 \N                                 | ENSGALG000000121 ?        | 0       |
| ENSGALT0000 Uncharacterized protein            | ENSGALG000000121 0.966482 | 2       |
| ENSGALT0000 Uncharacterized protein            | ENSGALG000000121 0.464758 | 0       |
| ENSGALT0000 \N                                 | ENSGALG000000121 0.298752 | 0.01483 |
| ENSGALT0000 \N                                 | ENSGALG000000121 0.689048 | 1936.18 |
| ENSGALT0000 Uncharacterized protein            | ENSGALG000000121 0.889955 | 55      |
| ENSGALT0000 Uncharacterized protein            | ENSGALG000000121 0.888332 | 6       |
| ENSGALT0000 Uncharacterized protein            | ENSGALG000000122 0.47795  | 154.199 |
| ENSGALT0000 \N                                 | ENSGALG000000122 0.934033 | 1600.5  |
| ENSGALT0000 Uncharacterized protein            | ENSGALG000000122 0.649519 | 0.5     |
| ENSGALT0000 Uncharacterized protein            | ENSGALG000000122 0.82552  | 49.16   |
| ENSGALT0000 Uncharacterized protein            | ENSGALG000000122 0.376117 | 3       |
| ENSGALT0000 Uncharacterized protein            | ENSGALG000000122 0.305453 | 1.5     |
| ENSGALT0000 Uncharacterized protein            | ENSGALG000000123 0.969142 | 5       |
| ENSGALT0000 Uncharacterized protein            | ENSGALG000000123 0.531934 | 84.9667 |
| ENSGALT0000 Uncharacterized protein            | ENSGALG000000123 0.886043 | 10      |
| ENSGALT0000 Uncharacterized protein            | ENSGALG000000123 0.649519 | 0.5     |
| ENSGALT0000 Uncharacterized protein            | ENSGALG000000123 0.651156 | 10      |
| ENSGALT0000 Uncharacterized protein            | ENSGALG000000123 0.988636 | 32.2164 |
| ENSGALT0000 Uncharacterized protein            | ENSGALG000000123 0.924445 | 123.5   |
| ENSGALT0000 Uncharacterized protein            | ENSGALG000000123 0.741912 | 5.5     |
| ENSGALT0000 \N                                 | ENSGALG000000124 0.964061 | 80.5    |
| ENSGALT0000 Uncharacterized protein            | ENSGALG000000124 0.828989 | 1.41203 |
| ENSGALT0000 Uncharacterized protein            | ENSGALG000000124 0.649519 | 0.5     |
| ENSGALT0000 Uncharacterized protein            | ENSGALG000000124 0.991431 | 836.5   |
| ENSGALT0000 Uncharacterized protein            | ENSGALG000000124 0.970413 | 236     |
| ENSGALT0000 Uncharacterized protein            | ENSGALG000000124 0.464758 | 0       |
| ENSGALT0000 \N                                 | ENSGALG000000124 0.936444 | 30.4851 |

|                                     |                           |          |
|-------------------------------------|---------------------------|----------|
| ENSGALT0000 Uncharacterized protein | ENSGALG0000001240.500483  | 13       |
| ENSGALT0000 \N                      | ENSGALG0000001250.591329  | 8        |
| ENSGALT0000 \N                      | ENSGALG0000001250.464758  | 0.58665  |
| ENSGALT0000 \N                      | ENSGALG0000001250.943802  | 107.5    |
| ENSGALT0000 Uncharacterized protein | ENSGALG000000125?         | 0        |
| ENSGALT0000 \N                      | ENSGALG000000127?         | 5.43E-21 |
| ENSGALT0000 \N                      | ENSGALG0000001270.90098   | 830.999  |
| ENSGALT0000 Uncharacterized protein | ENSGALG000000127?         | 0        |
| ENSGALT0000 \N                      | ENSGALG0000001280.542546  | 25.4688  |
| ENSGALT0000 \N                      | ENSGALG0000001280.905747  | 479.143  |
| ENSGALT0000 Uncharacterized protein | ENSGALG0000001280.7458    | 92.7854  |
| ENSGALT0000 \N                      | ENSGALG0000001290.767432  | 387.376  |
| ENSGALT0000 Uncharacterized protein | ENSGALG0000001290.649519  | 0        |
| ENSGALT0000 Uncharacterized protein | ENSGALG0000001290.54132   | 2.5305   |
| ENSGALT0000 Uncharacterized protein | ENSGALG0000001290.464758  | 0        |
| ENSGALT0000 Uncharacterized protein | ENSGALG0000001290.464758  | 0        |
| ENSGALT0000 Uncharacterized protein | ENSGALG000000129?         | 0        |
| ENSGALT0000 Uncharacterized protein | ENSGALG0000001290.949129  | 386.501  |
| ENSGALT0000 \N                      | ENSGALG0000001290.55254   | 83.7849  |
| ENSGALT0000 \N                      | ENSGALG0000001290.583349  | 108.607  |
| ENSGALT0000 \N                      | ENSGALG0000001290.991217  | 1.7134   |
| ENSGALT0000 \N                      | ENSGALG0000001300.983389  | 120.515  |
| ENSGALT0000 \N                      | ENSGALG000000130?         | 0        |
| ENSGALT0000 Uncharacterized protein | ENSGALG0000001300.464758  | 1        |
| ENSGALT0000 Uncharacterized protein | ENSGALG0000001300.925573  | 23       |
| ENSGALT0000 Uncharacterized protein | ENSGALG0000001300.969467  | 23.5     |
| ENSGALT0000 Uncharacterized protein | ENSGALG0000001300.793974  | 154.5    |
| ENSGALT0000 Uncharacterized protein | ENSGALG0000001310.871499  | 26.7919  |
| ENSGALT0000 Uncharacterized protein | ENSGALG0000001310.980927  | 86.6722  |
| ENSGALT0000 Uncharacterized protein | ENSGALG0000001310.931193  | 38       |
| ENSGALT0000 \N                      | ENSGALG000000131?         | 0        |
| ENSGALT0000 \N                      | ENSGALG000000131?         | 2.99E-13 |
| ENSGALT0000 Uncharacterized protein | ENSGALG000000131?         | 0        |
| ENSGALT0000 Uncharacterized protein | ENSGALG0000001310.806127  | 54       |
| ENSGALT0000 \N                      | ENSGALG0000001320.880941  | 6        |
| ENSGALT0000 Uncharacterized protein | ENSGALG0000001320.562857  | 5.23E-18 |
| ENSGALT0000 \N                      | ENSGALG0000001320.805033  | 2.5      |
| ENSGALT0000 Uncharacterized protein | ENSGALG0000001320.603682  | 0        |
| ENSGALT0000 Uncharacterized protein | ENSGALG000000132?         | 0        |
| ENSGALT0000 \N                      | ENSGALG0000001320.649519  | 0        |
| ENSGALT0000 \N                      | ENSGALG0000001320.973329  | 381.5    |
| ENSGALT0000 Uncharacterized protein | ENSGALG0000001320.993192  | 76.9999  |
| ENSGALT0000 Uncharacterized protein | ENSGALG0000001320.951971  | 790.568  |
| ENSGALT0000 Uncharacterized protein | ENSGALG0000001320.726343  | 18       |
| ENSGALT0000 \N                      | ENSGALG0000001320.0359887 | 1.02137  |
| ENSGALT0000 \N                      | ENSGALG0000001320.93386   | 155.5    |
| ENSGALT0000 \N                      | ENSGALG0000001320.464758  | 0        |
| ENSGALT0000 \N                      | ENSGALG0000001320.898356  | 1        |
| ENSGALT0000 \N                      | ENSGALG0000001320.95579   | 409.5    |
| ENSGALT0000 \N                      | ENSGALG0000001330.0795697 | 1290.48  |
| ENSGALT0000 \N                      | ENSGALG0000001330.984498  | 357.005  |
| ENSGALT0000 \N                      | ENSGALG0000001330.860569  | 8157     |
| ENSGALT0000 \N                      | ENSGALG0000001330.900635  | 130      |
| ENSGALT0000 Uncharacterized protein | ENSGALG0000001330.534404  | 0.5      |
| ENSGALT0000 \N                      | ENSGALG0000001330.9518    | 3714.38  |
| ENSGALT0000 Uncharacterized protein | ENSGALG0000001330.418305  | 1        |

|                                     |                          |          |
|-------------------------------------|--------------------------|----------|
| ENSGALT0000 Uncharacterized protein | ENSGALG0000001330.870884 | 9.21421  |
| ENSGALT0000 \N                      | ENSGALG0000001330.959328 | 432.781  |
| ENSGALT0000 \N                      | ENSGALG0000001330.882296 | 29.4796  |
| ENSGALT0000 \N                      | ENSGALG0000001330.958867 | 128.528  |
| ENSGALT0000 Uncharacterized protein | ENSGALG0000001330.872414 | 122.666  |
| ENSGALT0000 \N                      | ENSGALG0000001330.919781 | 3515.57  |
| ENSGALT0000 \N                      | ENSGALG0000001330.464758 | 0        |
| ENSGALT0000 MHC class II antigen    | ENSGALG0000001330.904881 | 60.0034  |
| ENSGALT0000 \N                      | ENSGALG000000133?        | 0        |
| ENSGALT0000 \N                      | ENSGALG0000001330.889795 | 329.5    |
| ENSGALT0000 \N                      | ENSGALG0000001330.998553 | 1754.54  |
| ENSGALT0000 \N                      | ENSGALG0000001340.712884 | 19.6107  |
| ENSGALT0000 \N                      | ENSGALG0000001340.735239 | 2.79781  |
| ENSGALT0000 Uncharacterized protein | ENSGALG0000001340.691826 | 160.5    |
| ENSGALT0000 \N                      | ENSGALG0000001340.640117 | 3.98293  |
| ENSGALT0000 \N                      | ENSGALG0000001340.674082 | 11.5103  |
| ENSGALT0000 Uncharacterized protein | ENSGALG0000001340.935881 | 28.5     |
| ENSGALT0000 \N                      | ENSGALG0000001340.75154  | 314.5    |
| ENSGALT0000 \N                      | ENSGALG0000001340.940189 | 574.34   |
| ENSGALT0000 \N                      | ENSGALG0000001340.438578 | 4459.5   |
| ENSGALT0000 \N                      | ENSGALG0000001340.939523 | 68.6134  |
| ENSGALT0000 \N                      | ENSGALG0000001340.464758 | 0        |
| ENSGALT0000 \N                      | ENSGALG0000001340.649519 | 0.5      |
| ENSGALT0000 Uncharacterized protein | ENSGALG0000001350.99724  | 4        |
| ENSGALT0000 \N                      | ENSGALG0000001350.795529 | 63.5     |
| ENSGALT0000 \N                      | ENSGALG0000001350.866515 | 2306.66  |
| ENSGALT0000 \N                      | ENSGALG0000001350.972602 | 21.346   |
| ENSGALT0000 \N                      | ENSGALG0000001350.550123 | 4.14011  |
| ENSGALT0000 \N                      | ENSGALG0000001350.979163 | 119.583  |
| ENSGALT0000 \N                      | ENSGALG0000001350.595783 | 272.5    |
| ENSGALT0000 \N                      | ENSGALG0000001350.960183 | 87.0001  |
| ENSGALT0000 \N                      | ENSGALG0000001350.949662 | 490      |
| ENSGALT0000 \N                      | ENSGALG0000001350.926874 | 149.055  |
| ENSGALT0000 Uncharacterized protein | ENSGALG0000001360.80451  | 477.198  |
| ENSGALT0000 Uncharacterized protein | ENSGALG0000001360.928212 | 149.5    |
| ENSGALT0000 \N                      | ENSGALG0000001360.464758 | 3.69E-06 |
| ENSGALT0000 \N                      | ENSGALG0000001360.464758 | 6.61E-07 |
| ENSGALT0000 \N                      | ENSGALG000000136?        | 0        |
| ENSGALT0000 \N                      | ENSGALG0000001360.960531 | 121      |
| ENSGALT0000 Uncharacterized protein | ENSGALG0000001360.840415 | 21       |
| ENSGALT0000 \N                      | ENSGALG0000001370.603456 | 1.03923  |
| ENSGALT0000 \N                      | ENSGALG0000001370.988486 | 5809.92  |
| ENSGALT0000 \N                      | ENSGALG0000001370.932031 | 283      |
| ENSGALT0000 Uncharacterized protein | ENSGALG0000001370.956712 | 570      |
| ENSGALT0000 Uncharacterized protein | ENSGALG0000001370.98994  | 41       |
| ENSGALT0000 Uncharacterized protein | ENSGALG0000001370.983237 | 68       |
| ENSGALT0000 Uncharacterized protein | ENSGALG000000137?        | 0        |
| ENSGALT0000 Uncharacterized protein | ENSGALG0000001370.628302 | 5.5      |
| ENSGALT0000 Uncharacterized protein | ENSGALG0000001370.508617 | 2284.5   |
| ENSGALT0000 Uncharacterized protein | ENSGALG0000001370.927256 | 18.4978  |
| ENSGALT0000 Uncharacterized protein | ENSGALG0000001380.475773 | 4.59774  |
| ENSGALT0000 Uncharacterized protein | ENSGALG0000001380.952567 | 3513.72  |
| ENSGALT0000 Uncharacterized protein | ENSGALG0000001380.389271 | 2237.37  |
| ENSGALT0000 \N                      | ENSGALG0000001380.499796 | 5.65846  |
| ENSGALT0000 Uncharacterized protein | ENSGALG0000001380.981789 | 50.5     |
| ENSGALT0000 Uncharacterized protein | ENSGALG0000001380.957578 | 1166.5   |



|                                     |                            |          |
|-------------------------------------|----------------------------|----------|
| ENSGALT0000 \N                      | ENSGALG000000138 0.99218   | 237.121  |
| ENSGALT0000 \N                      | ENSGALG000000138 0.95685   | 6.60011  |
| ENSGALT0000 \N                      | ENSGALG000000138 0.923091  | 1148     |
| ENSGALT0000 \N                      | ENSGALG000000139 ?         | 0        |
| ENSGALT0000 \N                      | ENSGALG000000139 0.639354  | 0.10681  |
| ENSGALT0000 Uncharacterized protein | ENSGALG000000139 0.871291  | 275.5    |
| ENSGALT0000 Uncharacterized protein | ENSGALG000000139 0.951722  | 8.5      |
| ENSGALT0000 \N                      | ENSGALG000000139 0.89126   | 19.5     |
| ENSGALT0000 Uncharacterized protein | ENSGALG000000139 0.889674  | 478      |
| ENSGALT0000 Uncharacterized protein | ENSGALG000000139 0.948449  | 537.5    |
| ENSGALT0000 Uncharacterized protein | ENSGALG000000139 0.980232  | 422.349  |
| ENSGALT0000 Uncharacterized protein | ENSGALG000000139 0.830218  | 984.503  |
| ENSGALT0000 \N                      | ENSGALG000000139 0.998509  | 9.5      |
| ENSGALT0000 \N                      | ENSGALG000000139 0.464758  | 6.96E-22 |
| ENSGALT0000 \N                      | ENSGALG000000139 0.922787  | 170.032  |
| ENSGALT0000 Uncharacterized protein | ENSGALG000000139 0.464758  | 0.5      |
| ENSGALT0000 \N                      | ENSGALG000000139 0.918275  | 1624.87  |
| ENSGALT0000 \N                      | ENSGALG000000139 0.0613571 | 1.38E-18 |
| ENSGALT0000 \N                      | ENSGALG000000140 0.964553  | 545.288  |
| ENSGALT0000 \N                      | ENSGALG000000140 0.988694  | 368      |
| ENSGALT0000 \N                      | ENSGALG000000140 0.649497  | 2.0575   |
| ENSGALT0000 \N                      | ENSGALG000000140 ?         | 0        |
| ENSGALT0000 \N                      | ENSGALG000000140 0.397953  | 0.6495   |
| ENSGALT0000 \N                      | ENSGALG000000140 0.713554  | 11155.5  |
| ENSGALT0000 \N                      | ENSGALG000000140 0.988683  | 89.2545  |
| ENSGALT0000 Uncharacterized protein | ENSGALG000000140 0.941973  | 40.5     |
| ENSGALT0000 \N                      | ENSGALG000000140 0.650342  | 1.35989  |
| ENSGALT0000 \N                      | ENSGALG000000140 0.973417  | 376.061  |
| ENSGALT0000 \N                      | ENSGALG000000140 0.995268  | 135      |
| ENSGALT0000 \N                      | ENSGALG000000140 0.571704  | 0        |
| ENSGALT0000 Uncharacterized protein | ENSGALG000000140 0.891997  | 33       |
| ENSGALT0000 \N                      | ENSGALG000000141 0.552365  | 382      |
| ENSGALT0000 Uncharacterized protein | ENSGALG000000141 0.371997  | 2        |
| ENSGALT0000 \N                      | ENSGALG000000141 ?         | 0        |
| ENSGALT0000 Uncharacterized protein | ENSGALG000000141 0.849979  | 22       |
| ENSGALT0000 \N                      | ENSGALG000000141 0.970245  | 1019.97  |
| ENSGALT0000 \N                      | ENSGALG000000141 0.943934  | 4        |
| ENSGALT0000 \N                      | ENSGALG000000141 0.930179  | 476.487  |
| ENSGALT0000 \N                      | ENSGALG000000141 0.925325  | 5.49999  |
| ENSGALT0000 Uncharacterized protein | ENSGALG000000141 0.12148   | 1.02E-07 |
| ENSGALT0000 Uncharacterized protein | ENSGALG000000142 0.954291  | 272.5    |
| ENSGALT0000 \N                      | ENSGALG000000142 0.919563  | 61.5     |
| ENSGALT0000 PPAR                    | ENSGALG000000142 0.940377  | 39.6478  |
| ENSGALT0000 Uncharacterized protein | ENSGALG000000142 0.994103  | 8.5      |
| ENSGALT0000 \N                      | ENSGALG000000142 0.693351  | 1.50351  |
| ENSGALT0000 Uncharacterized protein | ENSGALG000000142 ?         | 0        |
| ENSGALT0000 Uncharacterized protein | ENSGALG000000142 ?         | 0        |
| ENSGALT0000 Uncharacterized protein | ENSGALG000000142 0.93843   | 255.5    |
| ENSGALT0000 Uncharacterized protein | ENSGALG000000142 0.985905  | 220      |
| ENSGALT0000 \N                      | ENSGALG000000142 0.970241  | 375.5    |
| ENSGALT0000 Uncharacterized protein | ENSGALG000000142 0.953561  | 86       |
| ENSGALT0000 Uncharacterized protein | ENSGALG000000143 0.972495  | 12953.7  |
| ENSGALT0000 Uncharacterized protein | ENSGALG000000143 0.993199  | 27.5     |
| ENSGALT0000 \N                      | ENSGALG000000143 0.88826   | 825.834  |
| ENSGALT0000 \N                      | ENSGALG000000143 0.464758  | 3.70E-29 |
| ENSGALT0000 Uncharacterized protein | ENSGALG000000143 0.9868    | 223.5    |

|                                     |                            |          |
|-------------------------------------|----------------------------|----------|
| ENSGALT0000 Uncharacterized protein | ENSGALG000000143 0.99395   | 102.5    |
| ENSGALT0000 Uncharacterized protein | ENSGALG000000143 0.973625  | 24       |
| ENSGALT0000 \N                      | ENSGALG000000143 0.911534  | 77.686   |
| ENSGALT0000 \N                      | ENSGALG000000143 0.853815  | 0.5      |
| ENSGALT0000 Uncharacterized protein | ENSGALG000000143 0.989538  | 669.5    |
| ENSGALT0000 \N                      | ENSGALG000000143 0.962235  | 88.6493  |
| ENSGALT0000 \N                      | ENSGALG000000143 0.924025  | 31.0911  |
| ENSGALT0000 Uncharacterized protein | ENSGALG000000143 0.974237  | 32.5     |
| ENSGALT0000 \N                      | ENSGALG000000143 0.869612  | 26.1382  |
| ENSGALT0000 Uncharacterized protein | ENSGALG000000144 0.649519  | 0        |
| ENSGALT0000 \N                      | ENSGALG000000144 0.428668  | 14.5     |
| ENSGALT0000 \N                      | ENSGALG000000144 0.932946  | 237.979  |
| ENSGALT0000 \N                      | ENSGALG000000144 ?         | 0        |
| ENSGALT0000 \N                      | ENSGALG000000144 0.838812  | 22.9251  |
| ENSGALT0000 Uncharacterized protein | ENSGALG000000144 0.634758  | 3675.12  |
| ENSGALT0000 Uncharacterized protein | ENSGALG000000145 0.849034  | 189.5    |
| ENSGALT0000 Uncharacterized protein | ENSGALG000000145 0.954464  | 440.5    |
| ENSGALT0000 Uncharacterized protein | ENSGALG000000145 0.974388  | 164      |
| ENSGALT0000 Uncharacterized protein | ENSGALG000000145 0.905477  | 5162     |
| ENSGALT0000 Uncharacterized protein | ENSGALG000000145 0.973127  | 467.995  |
| ENSGALT0000 Uncharacterized protein | ENSGALG000000145 0.411166  | 2.70962  |
| ENSGALT0000 Uncharacterized protein | ENSGALG000000145 0.919214  | 62       |
| ENSGALT0000 \N                      | ENSGALG000000145 0.765453  | 18.7066  |
| ENSGALT0000 \N                      | ENSGALG000000145 0.995916  | 75.204   |
| ENSGALT0000 \N                      | ENSGALG000000145 0.953239  | 232      |
| ENSGALT0000 Uncharacterized protein | ENSGALG000000145 0.821889  | 1.67691  |
| ENSGALT0000 Uncharacterized protein | ENSGALG000000145 0.903521  | 3042     |
| ENSGALT0000 \N                      | ENSGALG000000146 0.689304  | 11.4349  |
| ENSGALT0000 Uncharacterized protein | ENSGALG000000146 0.33276   | 8.39222  |
| ENSGALT0000 \N                      | ENSGALG000000146 0.0503556 | 0.5      |
| ENSGALT0000 \N                      | ENSGALG000000146 0.979461  | 94.0047  |
| ENSGALT0000 Uncharacterized protein | ENSGALG000000146 0.973908  | 403.5    |
| ENSGALT0000 Uncharacterized protein | ENSGALG000000146 0.936823  | 1024     |
| ENSGALT0000 Uncharacterized protein | ENSGALG000000147 ?         | 0        |
| ENSGALT0000 \N                      | ENSGALG000000147 0.990848  | 99.2096  |
| ENSGALT0000 Uncharacterized protein | ENSGALG000000147 0.83903   | 10.5     |
| ENSGALT0000 Uncharacterized protein | ENSGALG000000147 0.951376  | 129      |
| ENSGALT0000 Uncharacterized protein | ENSGALG000000147 0.947757  | 149.015  |
| ENSGALT0000 Uncharacterized protein | ENSGALG000000147 ?         | 7.58E-22 |
| ENSGALT0000 Uncharacterized protein | ENSGALG000000147 0.649519  | 0        |
| ENSGALT0000 Uncharacterized protein | ENSGALG000000147 0.171119  | 186.618  |
| ENSGALT0000 Uncharacterized protein | ENSGALG000000148 0.952403  | 87.5     |
| ENSGALT0000 Uncharacterized protein | ENSGALG000000148 0.464758  | 0        |
| ENSGALT0000 \N                      | ENSGALG000000148 0.857759  | 426.5    |
| ENSGALT0000 Uncharacterized protein | ENSGALG000000148 0.926935  | 874.355  |
| ENSGALT0000 Uncharacterized protein | ENSGALG000000148 0.998293  | 74.8461  |
| ENSGALT0000 Uncharacterized protein | ENSGALG000000148 0.920496  | 5        |
| ENSGALT0000 Uncharacterized protein | ENSGALG000000148 0.464758  | 0        |
| ENSGALT0000 Uncharacterized protein | ENSGALG000000149 0.603682  | 1        |
| ENSGALT0000 Uncharacterized protein | ENSGALG000000149 0.977051  | 1303.5   |
| ENSGALT0000 Uncharacterized protein | ENSGALG000000149 0.7833    | 186.5    |
| ENSGALT0000 Uncharacterized protein | ENSGALG000000149 0.683403  | 2.5      |
| ENSGALT0000 Uncharacterized protein | ENSGALG000000149 0.973025  | 64       |
| ENSGALT0000 Uncharacterized protein | ENSGALG000000149 0.914433  | 14       |
| ENSGALT0000 Uncharacterized protein | ENSGALG000000149 0.718486  | 904.5    |
| ENSGALT0000 Uncharacterized protein | ENSGALG000000150 0.806167  | 1.5      |

|                                     |                           |         |
|-------------------------------------|---------------------------|---------|
| ENSGALT0000 \N                      | ENSGALG00000015C 0.996824 | 445     |
| ENSGALT0000 Uncharacterized protein | ENSGALG00000015C 0.995896 | 361     |
| ENSGALT0000 \N                      | ENSGALG00000015C 0.464758 | 0       |
| ENSGALT0000 Uncharacterized protein | ENSGALG00000015C 0.385204 | 0.5     |
| ENSGALT0000 Uncharacterized protein | ENSGALG00000015C 0.985176 | 714     |
| ENSGALT0000 Uncharacterized protein | ENSGALG00000015C 0.957731 | 1174.5  |
| ENSGALT0000 Uncharacterized protein | ENSGALG000000151?         | 0       |
| ENSGALT0000 Uncharacterized protein | ENSGALG0000001510.539038  | 0       |
| ENSGALT0000 Uncharacterized protein | ENSGALG0000001510.901842  | 11      |
| ENSGALT0000 Uncharacterized protein | ENSGALG0000001510.962536  | 4       |
| ENSGALT0000 Uncharacterized protein | ENSGALG0000001510.464758  | 0       |
| ENSGALT0000 \N                      | ENSGALG000000152 0.977624 | 63.5    |
| ENSGALT0000 Uncharacterized protein | ENSGALG000000152?         | 0       |
| ENSGALT0000 Uncharacterized protein | ENSGALG000000152 0.464758 | 0       |
| ENSGALT0000 Uncharacterized protein | ENSGALG000000152 1        | 0.5     |
| ENSGALT0000 Uncharacterized protein | ENSGALG000000152 0.846939 | 1.5     |
| ENSGALT0000 \N                      | ENSGALG000000152 0.887851 | 883.736 |
| ENSGALT0000 CHD-W                   | ENSGALG000000152 0.960402 | 516.77  |
| ENSGALT0000 Uncharacterized protein | ENSGALG000000152?         | 0       |
| ENSGALT0000 Uncharacterized protein | ENSGALG000000152?         | 0       |
| ENSGALT0000 \N                      | ENSGALG000000153 0.875218 | 189.5   |
| ENSGALT0000 Uncharacterized protein | ENSGALG000000153 0.971293 | 1.5     |
| ENSGALT0000 Uncharacterized protein | ENSGALG000000153?         | 0       |
| ENSGALT0000 Uncharacterized protein | ENSGALG000000154 0.969272 | 54      |
| ENSGALT0000 Uncharacterized protein | ENSGALG000000154 0.818488 | 0.5     |
| ENSGALT0000 Uncharacterized protein | ENSGALG000000154 0.982596 | 577.639 |
| ENSGALT0000 Uncharacterized protein | ENSGALG000000154 0.953341 | 97.5    |
| ENSGALT0000 \N                      | ENSGALG000000154 0.831499 | 1344.83 |
| ENSGALT0000 Uncharacterized protein | ENSGALG000000154 0.22129  | 0.5     |
| ENSGALT0000 Uncharacterized protein | ENSGALG000000155 0.970851 | 63      |
| ENSGALT0000 Uncharacterized protein | ENSGALG000000155 0.741498 | 8       |
| ENSGALT0000 Uncharacterized protein | ENSGALG000000155 0.914156 | 24.5    |
| ENSGALT0000 Uncharacterized protein | ENSGALG000000155 0.990098 | 893.109 |
| ENSGALT0000 Uncharacterized protein | ENSGALG000000155 0.861668 | 13      |
| ENSGALT0000 Uncharacterized protein | ENSGALG000000156 0.984992 | 541     |
| ENSGALT0000 Uncharacterized protein | ENSGALG000000156 0.971419 | 803.537 |
| ENSGALT0000 Uncharacterized protein | ENSGALG000000156 0.86272  | 5.93388 |
| ENSGALT0000 Uncharacterized protein | ENSGALG000000156 0.603682 | 0       |
| ENSGALT0000 Uncharacterized protein | ENSGALG000000156 0.949958 | 12.5    |
| ENSGALT0000 Uncharacterized protein | ENSGALG000000156 0.99427  | 807     |
| ENSGALT0000 Uncharacterized protein | ENSGALG000000156 0.97425  | 2       |
| ENSGALT0000 \N                      | ENSGALG000000156 0.897938 | 536     |
| ENSGALT0000 Uncharacterized protein | ENSGALG000000156 0.847193 | 348.5   |
| ENSGALT0000 Uncharacterized protein | ENSGALG000000156 0.982419 | 30.5    |
| ENSGALT0000 Uncharacterized protein | ENSGALG000000157 0.954445 | 91      |
| ENSGALT0000 Uncharacterized protein | ENSGALG000000157 0.953762 | 336.936 |
| ENSGALT0000 Uncharacterized protein | ENSGALG000000157 0.954203 | 5       |
| ENSGALT0000 Uncharacterized protein | ENSGALG000000157 0.481193 | 0.5     |
| ENSGALT0000 Uncharacterized protein | ENSGALG000000157?         | 0       |
| ENSGALT0000 \N                      | ENSGALG000000157 0.808892 | 1.86612 |
| ENSGALT0000 Uncharacterized protein | ENSGALG000000157 0.164317 | 0       |
| ENSGALT0000 \N                      | ENSGALG000000157 0.936025 | 332.223 |
| ENSGALT0000 Uncharacterized protein | ENSGALG000000157 0.976824 | 41.5    |
| ENSGALT0000 \N                      | ENSGALG000000158?         | 0       |
| ENSGALT0000 Uncharacterized protein | ENSGALG000000158?         | 0       |
| ENSGALT0000 Uncharacterized protein | ENSGALG000000159?         | 0       |

|                                               |                           |         |
|-----------------------------------------------|---------------------------|---------|
| ENSGALT0000 Uncharacterized protein           | ENSGALG000000159 ?        | 0       |
| ENSGALT0000 Uncharacterized protein           | ENSGALG000000159 0.985614 | 94.4431 |
| ENSGALT0000 \N                                | ENSGALG000000159 0.974127 | 146     |
| ENSGALT0000 Uncharacterized protein           | ENSGALG000000160 0.997491 | 188     |
| ENSGALT0000 Uncharacterized protein           | ENSGALG000000160 0.649519 | 0       |
| ENSGALT0000 Uncharacterized protein           | ENSGALG000000160 ?        | 0       |
| ENSGALT0000 Uncharacterized protein           | ENSGALG000000160 0.669963 | 39.5    |
| ENSGALT0000 Uncharacterized protein           | ENSGALG000000160 0.931088 | 44.8576 |
| ENSGALT0000 Uncharacterized protein           | ENSGALG000000160 0.979245 | 5660.44 |
| ENSGALT0000 Uncharacterized protein           | ENSGALG000000160 0.603682 | 1       |
| ENSGALT0000 Uncharacterized protein           | ENSGALG000000160 0.968483 | 229.5   |
| ENSGALT0000 Uncharacterized protein           | ENSGALG000000161 ?        | 0       |
| ENSGALT0000 Uncharacterized protein           | ENSGALG0000001610.974371  | 589.5   |
| ENSGALT0000 Uncharacterized protein           | ENSGALG0000001610.950369  | 1427.16 |
| ENSGALT0000 Uncharacterized protein           | ENSGALG0000001610.603682  | 1       |
| ENSGALT0000 Uncharacterized protein           | ENSGALG0000001610.595159  | 0.5     |
| ENSGALT0000 Uncharacterized protein           | ENSGALG0000001610.464758  | 0       |
| ENSGALT0000 Uncharacterized protein           | ENSGALG000000162 0.464758 | 1       |
| ENSGALT0000 Uncharacterized protein           | ENSGALG000000162 0.792671 | 8.5     |
| ENSGALT0000 Uncharacterized protein           | ENSGALG000000162 0.353553 | 0       |
| ENSGALT0000 \N                                | ENSGALG000000162 0.631223 | 1       |
| ENSGALT0000 Uncharacterized protein           | ENSGALG000000162 0.412715 | 9       |
| ENSGALT0000 \N                                | ENSGALG000000162 0.536413 | 1.5     |
| ENSGALT0000 Uncharacterized protein           | ENSGALG000000162 0.807959 | 6.5     |
| ENSGALT0000 Uncharacterized protein           | ENSGALG000000162 0.92006  | 21      |
| ENSGALT0000 Uncharacterized protein           | ENSGALG000000162 0.671068 | 4.88642 |
| ENSGALT0000 Uncharacterized protein           | ENSGALG000000162 0.94691  | 1.5     |
| ENSGALT0000 Uncharacterized protein           | ENSGALG000000163 0.993279 | 11.2504 |
| ENSGALT0000 Uncharacterized protein           | ENSGALG000000163 0.799073 | 29.218  |
| ENSGALT0000 Uncharacterized protein           | ENSGALG000000164 0.483373 | 90.5    |
| ENSGALT0000 \N                                | ENSGALG000000164 0.464758 | 0       |
| ENSGALT0000 Uncharacterized protein           | ENSGALG000000164 0.996105 | 31.5    |
| ENSGALT0000 Uncharacterized protein           | ENSGALG000000164 0.649519 | 0       |
| ENSGALT0000 Uncharacterized protein           | ENSGALG000000164 ?        | 0       |
| ENSGALT0000 Uncharacterized protein           | ENSGALG000000164 0.976597 | 577     |
| ENSGALT0000 Uncharacterized protein           | ENSGALG000000165 0.892101 | 195     |
| ENSGALT0000 Uncharacterized protein           | ENSGALG000000165 0.893049 | 964     |
| ENSGALT0000 Uncharacterized protein           | ENSGALG000000165 0.841344 | 382.5   |
| ENSGALT0000 Uncharacterized protein           | ENSGALG000000165 0.852249 | 144.18  |
| ENSGALT0000 Uncharacterized protein           | ENSGALG000000165 0.877233 | 13.5    |
| ENSGALT0000 Uncharacterized protein           | ENSGALG000000165 0.800618 | 2.5     |
| ENSGALT0000 Uncharacterized protein           | ENSGALG000000165 0.464758 | 0       |
| ENSGALT0000 Uncharacterized protein           | ENSGALG000000166 0.832299 | 11.6574 |
| ENSGALT0000 Uncharacterized protein           | ENSGALG000000166 0.966792 | 44      |
| ENSGALT0000 \N                                | ENSGALG000000166 0.971293 | 1.5     |
| ENSGALT0000 Uncharacterized protein           | ENSGALG000000166 0.898116 | 450.5   |
| ENSGALT0000 Uncharacterized protein           | ENSGALG000000166 0.363264 | 114     |
| ENSGALT0000 Hydroxyindole-o-methyltransferase | ENSGALG000000166 ?        | 0       |
| ENSGALT0000 Uncharacterized protein           | ENSGALG000000166 0.905264 | 27.9342 |
| ENSGALT0000 Uncharacterized protein           | ENSGALG000000167 0.995907 | 333     |
| ENSGALT0000 Uncharacterized protein           | ENSGALG000000167 0.994054 | 6.5     |
| ENSGALT0000 Uncharacterized protein           | ENSGALG000000167 0.854041 | 170.5   |
| ENSGALT0000 Uncharacterized protein           | ENSGALG000000167 0.999457 | 462.5   |
| ENSGALT0000 Uncharacterized protein           | ENSGALG000000168 0.978422 | 1308.5  |
| ENSGALT0000 Uncharacterized protein           | ENSGALG000000168 0.578754 | 1.5     |
| ENSGALT0000 Uncharacterized protein           | ENSGALG000000168 ?        | 0       |

|                                     |                           |          |
|-------------------------------------|---------------------------|----------|
| ENSGALT0000 Uncharacterized protein | ENSGALG000000168 1        | 0.5      |
| ENSGALT0000 Uncharacterized protein | ENSGALG000000169 ?        | 0        |
| ENSGALT0000 Uncharacterized protein | ENSGALG000000169 0.948363 | 191.5    |
| ENSGALT0000 Uncharacterized protein | ENSGALG000000169 ?        | 0        |
| ENSGALT0000 \N                      | ENSGALG000000169 0.931991 | 20.5     |
| ENSGALT0000 Uncharacterized protein | ENSGALG000000170 0.769262 | 33       |
| ENSGALT0000 \N                      | ENSGALG000000170 0.815677 | 124.5    |
| ENSGALT0000 Uncharacterized protein | ENSGALG000000170 0.508149 | 14.5     |
| ENSGALT0000 \N                      | ENSGALG000000170 ?        | 0        |
| ENSGALT0000 Uncharacterized protein | ENSGALG000000171 ?        | 0        |
| ENSGALT0000 Uncharacterized protein | ENSGALG0000001710.996884  | 1718.51  |
| ENSGALT0000 Uncharacterized protein | ENSGALG0000001710.986187  | 190      |
| ENSGALT0000 Uncharacterized protein | ENSGALG0000001710.667308  | 121.5    |
| ENSGALT0000 Uncharacterized protein | ENSGALG0000001710.918676  | 171.388  |
| ENSGALT0000 Uncharacterized protein | ENSGALG0000001710         | 2        |
| ENSGALT0000 Uncharacterized protein | ENSGALG0000001710.988956  | 369      |
| ENSGALT0000 Uncharacterized protein | ENSGALG000000172 0.397587 | 4        |
| ENSGALT0000 Uncharacterized protein | ENSGALG000000172 0.740073 | 2        |
| ENSGALT0000 Uncharacterized protein | ENSGALG000000172 ?        | 0        |
| ENSGALT0000 Uncharacterized protein | ENSGALG000000172 0.60689  | 0.5      |
| ENSGALT0000 Uncharacterized protein | ENSGALG000000172 0.99219  | 273      |
| ENSGALT0000 Uncharacterized protein | ENSGALG000000172 0.804174 | 3.5      |
| ENSGALT0000 Uncharacterized protein | ENSGALG000000173 0.950419 | 3.5      |
| ENSGALT0000 Uncharacterized protein | ENSGALG000000173 0.960261 | 191      |
| ENSGALT0000 \N                      | ENSGALG000000173 0.849553 | 4        |
| ENSGALT0000 \N                      | ENSGALG000000173 0.464758 | 0        |
| ENSGALT0000 Uncharacterized protein | ENSGALG000000173 0.925272 | 4029     |
| ENSGALT0000 \N                      | ENSGALG000000173 0.921801 | 433.5    |
| ENSGALT0000 Uncharacterized protein | ENSGALG000000173 0.898356 | 1        |
| ENSGALT0000 Uncharacterized protein | ENSGALG000000174 0.656952 | 2672.5   |
| ENSGALT0000 \N                      | ENSGALG000000174 0.556262 | 12.0165  |
| ENSGALT0000 Uncharacterized protein | ENSGALG000000174 0.212246 | 6.58E-23 |
| ENSGALT0000 Uncharacterized protein | ENSGALG000000174 0.876032 | 202.5    |
| ENSGALT0000 \N                      | ENSGALG000000175 0.96315  | 216.131  |
| ENSGALT0000 \N                      | ENSGALG000000175 0.982    | 19       |
| ENSGALT0000 \N                      | ENSGALG000000175 0.828596 | 435.117  |
| ENSGALT0000 \N                      | ENSGALG000000175 0.464758 | 0.5      |
| ENSGALT0000 \N                      | ENSGALG000000175 0.649322 | 0.6761   |
| ENSGALT0000 \N                      | ENSGALG000000175 0.464758 | 2.76E-18 |
| ENSGALT0000 \N                      | ENSGALG000000175 0.920093 | 6.5      |
| ENSGALT0000 \N                      | ENSGALG000000175 0.464758 | 0        |
| ENSGALT0000 \N                      | ENSGALG000000175 0.337282 | 1.64142  |
| ENSGALT0000 \N                      | ENSGALG000000175 ?        | 0        |
| ENSGALT0000 \N                      | ENSGALG000000175 0.886624 | 885      |
| ENSGALT0000 \N                      | ENSGALG000000175 0.115299 | 2.80E-26 |
| ENSGALT0000 \N                      | ENSGALG000000175 0.639814 | 1        |
| ENSGALT0000 \N                      | ENSGALG000000176 0.694275 | 16.3294  |
| ENSGALT0000 \N                      | ENSGALG000000176 0.510452 | 3.5      |
| ENSGALT0000 \N                      | ENSGALG000000176 0.78516  | 22.0702  |
| ENSGALT0000 \N                      | ENSGALG000000176 0.831735 | 246.886  |
| ENSGALT0000 Uncharacterized protein | ENSGALG000000176 0.999328 | 59.4315  |
| ENSGALT0000 \N                      | ENSGALG000000176 0.956889 | 90.0154  |
| ENSGALT0000 \N                      | ENSGALG000000176 0.532084 | 0        |
| ENSGALT0000 Uncharacterized protein | ENSGALG000000176 0.298906 | 64.1198  |
| ENSGALT0000 Uncharacterized protein | ENSGALG000000176 0.785501 | 30.8826  |
| ENSGALT0000 Uncharacterized protein | ENSGALG000000177 0.955189 | 380.001  |

|                |                           |          |
|----------------|---------------------------|----------|
| ENSGALT0000 \N | ENSGALG0000001770.574193  | 0        |
| ENSGALT0000 \N | ENSGALG0000001770.0741644 | 4.11798  |
| ENSGALT0000 \N | ENSGALG0000001790.549432  | 1.25     |
| ENSGALT0000 \N | ENSGALG0000001790.391213  | 0        |
| ENSGALT0000 \N | ENSGALG0000001790.580814  | 5.10E-06 |
| ENSGALT0000 \N | ENSGALG0000001790.570242  | 0.91667  |
| ENSGALT0000 \N | ENSGALG0000001790.570242  | 0.91667  |
| ENSGALT0000 \N | ENSGALG0000001790.464758  | 0        |
| ENSGALT0000 \N | ENSGALG000000179?         | 1.48E-16 |
| ENSGALT0000 \N | ENSGALG0000001790.685727  | 0.45     |
| ENSGALT0000 \N | ENSGALG0000001790.464788  | 0.16667  |
| ENSGALT0000 \N | ENSGALG0000001790.562993  | 0.5      |
| ENSGALT0000 \N | ENSGALG0000001790.11822   | 0.08333  |
| ENSGALT0000 \N | ENSGALG0000001790.587519  | 0.5      |
| ENSGALT0000 \N | ENSGALG0000001790.570242  | 0.91667  |
| ENSGALT0000 \N | ENSGALG0000001790.570242  | 0.91667  |
| ENSGALT0000 \N | ENSGALG0000001790.11822   | 0.08333  |
| ENSGALT0000 \N | ENSGALG0000001790.11822   | 0.08333  |
| ENSGALT0000 \N | ENSGALG0000001790.11822   | 0.08333  |
| ENSGALT0000 \N | ENSGALG0000001790.464758  | 0        |
| ENSGALT0000 \N | ENSGALG0000001790.244778  | 0.5      |
| ENSGALT0000 \N | ENSGALG0000001790.371997  | 0.33333  |
| ENSGALT0000 \N | ENSGALG0000001790.464758  | 0        |
| ENSGALT0000 \N | ENSGALG000000179?         | 0        |
| ENSGALT0000 \N | ENSGALG0000001790.464758  | 0        |
| ENSGALT0000 \N | ENSGALG000000179?         | 0        |
| ENSGALT0000 \N | ENSGALG000000179?         | 0        |
| ENSGALT0000 \N | ENSGALG000000179?         | 0        |
| ENSGALT0000 \N | ENSGALG0000001790.550159  | 0.475    |
| ENSGALT0000 \N | ENSGALG0000001790.19245   | 0.25     |
| ENSGALT0000 \N | ENSGALG0000001790.371997  | 0.33333  |
| ENSGALT0000 \N | ENSGALG0000001790.280069  | 2.96E-16 |
| ENSGALT0000 \N | ENSGALG0000001790.464758  | 0        |
| ENSGALT0000 \N | ENSGALG0000001800.662104  | 0.25     |
| ENSGALT0000 \N | ENSGALG0000001800.464632  | 0        |
| ENSGALT0000 \N | ENSGALG0000001800.526362  | 3.83333  |
| ENSGALT0000 \N | ENSGALG000000180?         | 0        |
| ENSGALT0000 \N | ENSGALG0000001800.59426   | 0.16667  |
| ENSGALT0000 \N | ENSGALG0000001800.464758  | 1.5      |
| ENSGALT0000 \N | ENSGALG000000180?         | 0        |
| ENSGALT0000 \N | ENSGALG0000001800.570242  | 0.91667  |
| ENSGALT0000 \N | ENSGALG0000001800.464758  | 0        |
| ENSGALT0000 \N | ENSGALG0000001800.631223  | 0        |
| ENSGALT0000 \N | ENSGALG0000001800.853815  | 0.5      |
| ENSGALT0000 \N | ENSGALG0000001800.570242  | 0.91667  |
| ENSGALT0000 \N | ENSGALG0000001800.131521  | 0        |
| ENSGALT0000 \N | ENSGALG0000001800.550159  | 0.475    |
| ENSGALT0000 \N | ENSGALG000000180?         | 0        |
| ENSGALT0000 \N | ENSGALG0000001800.631223  | 0        |
| ENSGALT0000 \N | ENSGALG0000001800.649519  | 0.25     |
| ENSGALT0000 \N | ENSGALG000000180?         | 0        |
| ENSGALT0000 \N | ENSGALG000000180?         | 0        |
| ENSGALT0000 \N | ENSGALG0000001800.734344  | 0.75     |
| ENSGALT0000 \N | ENSGALG0000001800.734344  | 0.75     |
| ENSGALT0000 \N | ENSGALG0000001800.693102  | 1        |
| ENSGALT0000 \N | ENSGALG000000180?         | 0        |

|                |                           |          |
|----------------|---------------------------|----------|
| ENSGALT0000 \N | ENSGALG00000018C 0.734344 | 0.75     |
| ENSGALT0000 \N | ENSGALG00000018C ?        | 0        |
| ENSGALT0000 \N | ENSGALG00000018C 0.693102 | 1        |
| ENSGALT0000 \N | ENSGALG00000018C 0.734344 | 0.75     |
| ENSGALT0000 \N | ENSGALG00000018C ?        | 0        |
| ENSGALT0000 \N | ENSGALG00000018C 0.464758 | 0.5      |
| ENSGALT0000 \N | ENSGALG00000018C ?        | 0        |
| ENSGALT0000 \N | ENSGALG00000018C 0.391213 | 0        |
| ENSGALT0000 \N | ENSGALG00000018C 0.498892 | 0.12793  |
| ENSGALT0000 \N | ENSGALG00000018C 0.391213 | 0        |
| ENSGALT0000 \N | ENSGALG00000018C 0.554569 | 2        |
| ENSGALT0000 \N | ENSGALG00000018C 0.464758 | 0        |
| ENSGALT0000 \N | ENSGALG00000018C 0.550159 | 0.475    |
| ENSGALT0000 \N | ENSGALG00000018C 0.391213 | 0        |
| ENSGALT0000 \N | ENSGALG00000018C ?        | 0        |
| ENSGALT0000 \N | ENSGALG00000018C 0.391213 | 0        |
| ENSGALT0000 \N | ENSGALG00000018C 0.464758 | 0.5      |
| ENSGALT0000 \N | ENSGALG00000018C ?        | 0        |
| ENSGALT0000 \N | ENSGALG00000018C ?        | 0        |
| ENSGALT0000 \N | ENSGALG00000018C ?        | 0        |
| ENSGALT0000 \N | ENSGALG00000018C ?        | 0        |
| ENSGALT0000 \N | ENSGALG00000018C 0.899851 | 10.7428  |
| ENSGALT0000 \N | ENSGALG00000018C 0.464758 | 0        |
| ENSGALT0000 \N | ENSGALG00000018C 0.853815 | 1.5      |
| ENSGALT0000 \N | ENSGALG00000018C 0.853815 | 1.5      |
| ENSGALT0000 \N | ENSGALG00000018C 0.464758 | 0        |
| ENSGALT0000 \N | ENSGALG00000018C ?        | 0        |
| ENSGALT0000 \N | ENSGALG00000018C 0.693102 | 1        |
| ENSGALT0000 \N | ENSGALG00000018C 0.441306 | 0.5      |
| ENSGALT0000 \N | ENSGALG00000018C ?        | 0        |
| ENSGALT0000 \N | ENSGALG00000018C ?        | 0        |
| ENSGALT0000 \N | ENSGALG00000018C ?        | 0        |
| ENSGALT0000 \N | ENSGALG00000018C ?        | 0        |
| ENSGALT0000 \N | ENSGALG00000018C ?        | 0        |
| ENSGALT0000 \N | ENSGALG00000018C 0.524047 | 0.1      |
| ENSGALT0000 \N | ENSGALG00000018C 0.464758 | 0        |
| ENSGALT0000 \N | ENSGALG00000018C ?        | 0        |
| ENSGALT0000 \N | ENSGALG00000018C 0.618551 | 0.5      |
| ENSGALT0000 \N | ENSGALG00000018C 0.618551 | 0.5      |
| ENSGALT0000 \N | ENSGALG00000018C 0.464758 | 1.18E-09 |
| ENSGALT0000 \N | ENSGALG00000018C 0.547092 | 0.5      |
| ENSGALT0000 \N | ENSGALG00000018C ?        | 0        |
| ENSGALT0000 \N | ENSGALG00000018C 0.464758 | 0        |
| ENSGALT0000 \N | ENSGALG00000018C 0.618551 | 0.5      |
| ENSGALT0000 \N | ENSGALG00000018C 0.550159 | 0.475    |
| ENSGALT0000 \N | ENSGALG000000181?         | 0        |
| ENSGALT0000 \N | ENSGALG000000181?         | 0        |
| ENSGALT0000 \N | ENSGALG0000001810.648108  | 2.83348  |
| ENSGALT0000 \N | ENSGALG000000181?         | 0        |
| ENSGALT0000 \N | ENSGALG0000001810.186286  | 5.5      |
| ENSGALT0000 \N | ENSGALG0000001810.481129  | 40       |
| ENSGALT0000 \N | ENSGALG0000001810.356623  | 6.5      |
| ENSGALT0000 \N | ENSGALG0000001810.526362  | 3.83333  |
| ENSGALT0000 \N | ENSGALG0000001810.693102  | 1        |
| ENSGALT0000 \N | ENSGALG0000001810.464758  | 0        |
| ENSGALT0000 \N | ENSGALG000000181?         | 0        |
| ENSGALT0000 \N | ENSGALG0000001810.693102  | 1        |

|                |                          |          |
|----------------|--------------------------|----------|
| ENSGALT0000 \N | ENSGALG0000001810.604344 | 0.61667  |
| ENSGALT0000 \N | ENSGALG0000001810.630547 | 2.01286  |
| ENSGALT0000 \N | ENSGALG000000181?        | 1.48E-16 |
| ENSGALT0000 \N | ENSGALG0000001810.391213 | 0        |
| ENSGALT0000 \N | ENSGALG0000001810.391213 | 0        |
| ENSGALT0000 \N | ENSGALG0000001810.441306 | 0.5      |
| ENSGALT0000 \N | ENSGALG000000181?        | 0        |
| ENSGALT0000 \N | ENSGALG000000181?        | 0        |
| ENSGALT0000 \N | ENSGALG000000181?        | 0        |
| ENSGALT0000 \N | ENSGALG000000181?        | 0        |
| ENSGALT0000 \N | ENSGALG0000001810.649519 | 3        |
| ENSGALT0000 \N | ENSGALG0000001810.464758 | 0        |
| ENSGALT0000 \N | ENSGALG0000001810.899851 | 10.7428  |
| ENSGALT0000 \N | ENSGALG0000001810.899851 | 10.7428  |
| ENSGALT0000 \N | ENSGALG000000181?        | 0        |
| ENSGALT0000 \N | ENSGALG0000001810.11822  | 0.08333  |
| ENSGALT0000 \N | ENSGALG0000001810.617492 | 2.5      |
| ENSGALT0000 \N | ENSGALG0000001810.630547 | 2.01286  |
| ENSGALT0000 \N | ENSGALG0000001810.630547 | 2.01286  |
| ENSGALT0000 \N | ENSGALG0000001810.587519 | 0.5      |
| ENSGALT0000 \N | ENSGALG0000001810.12137  | 0.5      |
| ENSGALT0000 \N | ENSGALG0000001810.707664 | 2        |
| ENSGALT0000 \N | ENSGALG0000001810.464758 | 0        |
| ENSGALT0000 \N | ENSGALG0000001810.464758 | 0        |
| ENSGALT0000 \N | ENSGALG0000001810.875162 | 1.2      |
| ENSGALT0000 \N | ENSGALG0000001810.371997 | 0.33333  |
| ENSGALT0000 \N | ENSGALG000000181?        | 0        |
| ENSGALT0000 \N | ENSGALG000000181?        | 0        |
| ENSGALT0000 \N | ENSGALG000000181?        | 0        |
| ENSGALT0000 \N | ENSGALG000000181?        | 0        |
| ENSGALT0000 \N | ENSGALG000000181?        | 0        |
| ENSGALT0000 \N | ENSGALG000000181?        | 8.15E-13 |
| ENSGALT0000 \N | ENSGALG000000181?        | 0        |
| ENSGALT0000 \N | ENSGALG000000181?        | 0        |
| ENSGALT0000 \N | ENSGALG0000001810.464758 | 0.16667  |
| ENSGALT0000 \N | ENSGALG0000001810.853488 | 0.50049  |
| ENSGALT0000 \N | ENSGALG000000181?        | 0        |
| ENSGALT0000 \N | ENSGALG000000181?        | 0        |
| ENSGALT0000 \N | ENSGALG0000001810.36417  | 3.99951  |
| ENSGALT0000 \N | ENSGALG0000001810.526362 | 3.83333  |
| ENSGALT0000 \N | ENSGALG0000001810.603682 | 0        |
| ENSGALT0000 \N | ENSGALG0000001810.649519 | 0.25     |
| ENSGALT0000 \N | ENSGALG000000181?        | 0        |
| ENSGALT0000 \N | ENSGALG000000181?        | 0        |
| ENSGALT0000 \N | ENSGALG000000182?        | 0        |
| ENSGALT0000 \N | ENSGALG0000001830.865939 | 13.5     |
| ENSGALT0000 \N | ENSGALG0000001830.970567 | 117.5    |
| ENSGALT0000 \N | ENSGALG0000001830.969954 | 11       |
| ENSGALT0000 \N | ENSGALG0000001830.938628 | 31.5     |
| ENSGALT0000 \N | ENSGALG0000001830.665214 | 66       |
| ENSGALT0000 \N | ENSGALG0000001830.878758 | 9.5      |
| ENSGALT0000 \N | ENSGALG0000001830.949201 | 76.5     |
| ENSGALT0000 \N | ENSGALG0000001830.874163 | 152      |
| ENSGALT0000 \N | ENSGALG0000001830.876198 | 15591.3  |
| ENSGALT0000 \N | ENSGALG0000001830.985471 | 238.5    |
| ENSGALT0000 \N | ENSGALG0000001830.961366 | 240.5    |
| ENSGALT0000 \N | ENSGALG0000001830.962018 | 334      |



|                                          |                           |          |
|------------------------------------------|---------------------------|----------|
| ENSGALT0000 \N                           | ENSGALG0000001830.764925  | 412.5    |
| ENSGALT0000 \N                           | ENSGALG0000001830.72017   | 31.5     |
| ENSGALT0000 \N                           | ENSGALG0000001830.593616  | 259      |
| ENSGALT0000 \N                           | ENSGALG0000001830.887808  | 130.5    |
| ENSGALT0000 \N                           | ENSGALG0000001830.922403  | 114.5    |
| ENSGALT0000 \N                           | ENSGALG0000001830.976289  | 60377    |
| ENSGALT0000 \N                           | ENSGALG0000001830.97808   | 27       |
| ENSGALT0000 \N                           | ENSGALG0000001830.927548  | 22742    |
| ENSGALT0000 \N                           | ENSGALG0000001830.384836  | 19       |
| ENSGALT0000 \N                           | ENSGALG0000001830.80379   | 30.9977  |
| ENSGALT0000 \N                           | ENSGALG0000001830.842394  | 31.6398  |
| ENSGALT0000 \N                           | ENSGALG0000001840.945368  | 55.0076  |
| ENSGALT0000 \N                           | ENSGALG0000001840.22129   | 0        |
| ENSGALT0000 \N                           | ENSGALG000000184?         | 0        |
| ENSGALT0000 Uncharacterized protein      | ENSGALG000000184?         | 0        |
| ENSGALT0000 \N                           | ENSGALG000000184?         | 0        |
| ENSGALT0000 \N                           | ENSGALG000000184?         | 0        |
| ENSGALT0000 Uncharacterized protein      | ENSGALG0000001840.996163  | 321      |
| ENSGALT0000 Uncharacterized protein      | ENSGALG0000001840.545129  | 11.5     |
| ENSGALT0000 \N                           | ENSGALG0000001850.883221  | 4        |
| ENSGALT0000 \N                           | ENSGALG0000001850.995362  | 4.91369  |
| ENSGALT0000 Uncharacterized protein      | ENSGALG0000001850.932761  | 1339     |
| ENSGALT0000 Uncharacterized protein      | ENSGALG0000001850.943934  | 1        |
| ENSGALT0000 \N                           | ENSGALG0000001850.29877   | 7.20501  |
| ENSGALT0000 \N                           | ENSGALG0000001850.675796  | 21.147   |
| ENSGALT0000 \N                           | ENSGALG000000185?         | 0        |
| ENSGALT0000 \N                           | ENSGALG0000001850.708107  | 0.5433   |
| ENSGALT0000 \N                           | ENSGALG0000001850.782036  | 2.64712  |
| ENSGALT0000 \N                           | ENSGALG0000001850.568383  | 2.10E-07 |
| ENSGALT0000 \N                           | ENSGALG0000001850.980836  | 70.0569  |
| ENSGALT0000 \N                           | ENSGALG0000001850.631194  | 275.5    |
| ENSGALT0000 \N                           | ENSGALG0000001850.829769  | 312      |
| ENSGALT0000 \N                           | ENSGALG0000001850.670801  | 119      |
| ENSGALT0000 Uncharacterized protein      | ENSGALG0000001860.982311  | 49.5     |
| ENSGALT0000 \N                           | ENSGALG0000001860.62319   | 2.02E-10 |
| ENSGALT0000 Uncharacterized protein      | ENSGALG0000001860.777087  | 8.49714  |
| ENSGALT0000 \N                           | ENSGALG000000186?         | 0        |
| ENSGALT0000 Uncharacterized protein      | ENSGALG0000001860.474548  | 1.03816  |
| ENSGALT0000 Uncharacterized protein      | ENSGALG000000186?         | 0        |
| ENSGALT0000 \N                           | ENSGALG0000001860.464758  | 0.5      |
| ENSGALT0000 \N                           | ENSGALG0000001860.0391037 | 102.869  |
| ENSGALT0000 \N                           | ENSGALG0000001860.955786  | 16.0701  |
| ENSGALT0000 \N                           | ENSGALG0000001860.934893  | 55.7624  |
| ENSGALT0000 Female-associated factor FAF | ENSGALG000000186?         | 2.60E-38 |
| ENSGALT0000 \N                           | ENSGALG0000001870.930522  | 33       |
| ENSGALT0000 \N                           | ENSGALG0000001870.892456  | 3.90612  |
| ENSGALT0000 \N                           | ENSGALG0000001870.683403  | 5        |
| ENSGALT0000 \N                           | ENSGALG0000001870.761252  | 41       |
| ENSGALT0000 Uncharacterized protein      | ENSGALG0000001870.639897  | 2        |
| ENSGALT0000 Uncharacterized protein      | ENSGALG0000001870.86853   | 83.5     |
| ENSGALT0000 \N                           | ENSGALG000000187?         | 1.75E-20 |
| ENSGALT0000 \N                           | ENSGALG0000001870.330049  | 62       |
| ENSGALT0000 \N                           | ENSGALG0000001870.992943  | 244.246  |
| ENSGALT0000 \N                           | ENSGALG0000001870.960509  | 119.041  |
| ENSGALT0000 \N                           | ENSGALG000000187?         | 0        |
| ENSGALT0000 \N                           | ENSGALG0000001870.465055  | 3.89E-11 |

|                                                 |                             |          |
|-------------------------------------------------|-----------------------------|----------|
| ENSGALT0000 \N                                  | ENSGALG0000001870.918379    | 442      |
| ENSGALT0000 \N                                  | ENSGALG0000001870.000534261 | 2.28E-08 |
| ENSGALT0000 Uncharacterized protein             | ENSGALG0000001870.906853    | 234      |
| ENSGALT0000 \N                                  | ENSGALG0000001870.799021    | 4.7757   |
| ENSGALT0000 \N                                  | ENSGALG0000001870.912943    | 56.3773  |
| ENSGALT0000 Uncharacterized protein             | ENSGALG0000001870.995676    | 273      |
| ENSGALT0000 \N                                  | ENSGALG0000001870.957088    | 52.5     |
| ENSGALT0000 Uncharacterized protein             | ENSGALG000000187?           | 0        |
| ENSGALT0000 \N                                  | ENSGALG0000001870.955583    | 4035.53  |
| ENSGALT0000 \N                                  | ENSGALG0000001870.937099    | 12.8713  |
| ENSGALT0000 \N                                  | ENSGALG0000001870.9864      | 92.1821  |
| ENSGALT0000 \N                                  | ENSGALG000000187?           | 0        |
| ENSGALT0000 \N                                  | ENSGALG0000001870.464758    | 2.28E-16 |
| ENSGALT0000 \N                                  | ENSGALG000000187?           | 0        |
| ENSGALT0000 Uncharacterized protein             | ENSGALG0000001870.975683    | 5        |
| ENSGALT0000 \N                                  | ENSGALG0000001870.660891    | 6        |
| ENSGALT0000 \N                                  | ENSGALG0000001870.954904    | 10.5501  |
| ENSGALT0000 Partial mitochondrial ribosomal pro | ENSGALG0000001880.87969     | 1786.29  |
| ENSGALT0000 \N                                  | ENSGALG0000001880.464757    | 3.13E-10 |
| ENSGALT0000 \N                                  | ENSGALG0000001880.689739    | 224.935  |
| ENSGALT0000 \N                                  | ENSGALG0000001880.162035    | 615.5    |
| ENSGALT0000 Uncharacterized protein             | ENSGALG0000001880.893077    | 1        |
| ENSGALT0000 Uncharacterized protein             | ENSGALG0000001880.95955     | 348.663  |
| ENSGALT0000 \N                                  | ENSGALG0000001880.929445    | 51.2516  |
| ENSGALT0000 \N                                  | ENSGALG0000001880.851093    | 6.82344  |
| ENSGALT0000 \N                                  | ENSGALG0000001880.815498    | 477      |
| ENSGALT0000 \N                                  | ENSGALG0000001880.464761    | 1        |
| ENSGALT0000 \N                                  | ENSGALG0000001880.985546    | 40.2234  |
| ENSGALT0000 \N                                  | ENSGALG0000001880.464758    | 0.00294  |
| ENSGALT0000 \N                                  | ENSGALG000000189?           | 8.55E-32 |
| ENSGALT0000 \N                                  | ENSGALG0000001890.603682    | 0        |
| ENSGALT0000 \N                                  | ENSGALG0000001890.991067    | 226.963  |
| ENSGALT0000 \N                                  | ENSGALG0000001890.932886    | 34.8257  |
| ENSGALT0000 Uncharacterized protein             | ENSGALG0000001890.603682    | 1        |
| ENSGALT0000 \N                                  | ENSGALG000000189?           | 0        |
| ENSGALT0000 \N                                  | ENSGALG0000001890.965184    | 1325.65  |
| ENSGALT0000 Uncharacterized protein             | ENSGALG0000001890.464795    | 0.00025  |
| ENSGALT0000 \N                                  | ENSGALG0000001890.855394    | 24.9498  |
| ENSGALT0000 \N                                  | ENSGALG0000001890.723648    | 6562     |
| ENSGALT0000 \N                                  | ENSGALG0000001900.920128    | 21.5     |
| ENSGALT0000 Uncharacterized protein             | ENSGALG0000001900.539038    | 0        |
| ENSGALT0000 Uncharacterized protein             | ENSGALG0000001900.464758    | 7.60E-24 |
| ENSGALT0000 \N                                  | ENSGALG000000190?           | 0        |
| ENSGALT0000 Uncharacterized protein             | ENSGALG0000001900.764365    | 221.5    |
| ENSGALT0000 Uncharacterized protein             | ENSGALG0000001900.898356    | 1        |
| ENSGALT0000 Uncharacterized protein             | ENSGALG0000001900.781368    | 3        |
| ENSGALT0000 Uncharacterized protein             | ENSGALG000000190?           | 0        |
| ENSGALT0000 Uncharacterized protein             | ENSGALG0000001900.603682    | 0        |
| ENSGALT0000 Uncharacterized protein             | ENSGALG000000190?           | 0        |
| ENSGALT0000 Uncharacterized protein             | ENSGALG0000001900.649519    | 0        |
| ENSGALT0000 Uncharacterized protein             | ENSGALG0000001900.986263    | 1058     |
| ENSGALT0000 Uncharacterized protein             | ENSGALG000000190?           | 0        |
| ENSGALT0000 Uncharacterized protein             | ENSGALG0000001900.78376     | 263.5    |
| ENSGALT0000 Uncharacterized protein             | ENSGALG000000191?           | 0        |
| ENSGALT0000 Uncharacterized protein             | ENSGALG0000001910.945872    | 18.5     |
| ENSGALT0000 Uncharacterized protein             | ENSGALG0000001910.852363    | 12       |

|                                     |                           |          |
|-------------------------------------|---------------------------|----------|
| ENSGALT0000 Uncharacterized protein | ENSGALG0000001910.464758  | 0        |
| ENSGALT0000 Uncharacterized protein | ENSGALG0000001910.457515  | 0.5      |
| ENSGALT0000 Uncharacterized protein | ENSGALG000000191?         | 0        |
| ENSGALT0000 Uncharacterized protein | ENSGALG000000191?         | 0        |
| ENSGALT0000 Uncharacterized protein | ENSGALG0000001910.0262098 | 0        |
| ENSGALT0000 Uncharacterized protein | ENSGALG0000001910.464758  | 0        |
| ENSGALT0000 Uncharacterized protein | ENSGALG0000001910.97308   | 5.56579  |
| ENSGALT0000 Uncharacterized protein | ENSGALG0000001910.631223  | 0        |
| ENSGALT0000 Uncharacterized protein | ENSGALG0000001910.93408   | 5        |
| ENSGALT0000 \N                      | ENSGALG0000001910.968247  | 554.375  |
| ENSGALT0000 Uncharacterized protein | ENSGALG000000191?         | 0        |
| ENSGALT0000 Uncharacterized protein | ENSGALG0000001910.853815  | 0.5      |
| ENSGALT0000 Uncharacterized protein | ENSGALG0000001920.981816  | 26.5     |
| ENSGALT0000 Uncharacterized protein | ENSGALG0000001920.155477  | 1.16118  |
| ENSGALT0000 Uncharacterized protein | ENSGALG000000192?         | 0        |
| ENSGALT0000 Uncharacterized protein | ENSGALG0000001920.8606    | 15       |
| ENSGALT0000 Uncharacterized protein | ENSGALG0000001920.751311  | 61.5     |
| ENSGALT0000 Uncharacterized protein | ENSGALG0000001920.464765  | 1.74E-05 |
| ENSGALT0000 Uncharacterized protein | ENSGALG0000001920.740073  | 0.5      |
| ENSGALT0000 Uncharacterized protein | ENSGALG0000001920.722096  | 1.5      |
| ENSGALT0000 Uncharacterized protein | ENSGALG0000001920.824205  | 3        |
| ENSGALT0000 Uncharacterized protein | ENSGALG000000192?         | 0        |
| ENSGALT0000 Uncharacterized protein | ENSGALG0000001920.799916  | 118.5    |
| ENSGALT0000 Uncharacterized protein | ENSGALG000000192?         | 0        |
| ENSGALT0000 Uncharacterized protein | ENSGALG0000001920.954288  | 195      |
| ENSGALT0000 Uncharacterized protein | ENSGALG0000001920.982205  | 979      |
| ENSGALT0000 Uncharacterized protein | ENSGALG0000001920.959462  | 352.5    |
| ENSGALT0000 Uncharacterized protein | ENSGALG000000192?         | 0        |
| ENSGALT0000 Uncharacterized protein | ENSGALG0000001920.788013  | 33       |
| ENSGALT0000 Uncharacterized protein | ENSGALG0000001920.164317  | 0        |
| ENSGALT0000 Uncharacterized protein | ENSGALG0000001930.848767  | 28.5     |
| ENSGALT0000 Uncharacterized protein | ENSGALG0000001930.891469  | 33.5     |
| ENSGALT0000 Uncharacterized protein | ENSGALG0000001930.722096  | 1.5      |
| ENSGALT0000 Uncharacterized protein | ENSGALG0000001930.838511  | 5        |
| ENSGALT0000 Uncharacterized protein | ENSGALG000000193?         | 0        |
| ENSGALT0000 Uncharacterized protein | ENSGALG0000001930.889958  | 95.5     |
| ENSGALT0000 Uncharacterized protein | ENSGALG0000001930.853815  | 1        |
| ENSGALT0000 Uncharacterized protein | ENSGALG0000001930.895318  | 3        |
| ENSGALT0000 Uncharacterized protein | ENSGALG000000193?         | 0        |
| ENSGALT0000 Uncharacterized protein | ENSGALG0000001930.988868  | 4        |
| ENSGALT0000 Uncharacterized protein | ENSGALG000000193?         | 0        |
| ENSGALT0000 Uncharacterized protein | ENSGALG0000001930.740073  | 1        |
| ENSGALT0000 Uncharacterized protein | ENSGALG0000001940.464758  | 0.5      |
| ENSGALT0000 Uncharacterized protein | ENSGALG000000194?         | 0        |
| ENSGALT0000 Uncharacterized protein | ENSGALG000000194?         | 0        |
| ENSGALT0000 Uncharacterized protein | ENSGALG0000001940.976762  | 58.5     |
| ENSGALT0000 Uncharacterized protein | ENSGALG000000194?         | 0        |
| ENSGALT0000 Uncharacterized protein | ENSGALG000000194?         | 0        |
| ENSGALT0000 Uncharacterized protein | ENSGALG0000001940.464758  | 0        |
| ENSGALT0000 \N                      | ENSGALG000000194?         | 0        |
| ENSGALT0000 \N                      | ENSGALG000000194?         | 0        |
| ENSGALT0000 Uncharacterized protein | ENSGALG000000194?         | 0        |
| ENSGALT0000 Uncharacterized protein | ENSGALG000000194?         | 0        |
| ENSGALT0000 \N                      | ENSGALG0000001940.997399  | 95.9999  |
| ENSGALT0000 \N                      | ENSGALG0000001940.477659  | 0.08958  |
| ENSGALT0000 Uncharacterized protein | ENSGALG0000001940.464758  | 0.5      |

|                                     |                          |         |
|-------------------------------------|--------------------------|---------|
| ENSGALT0000 Uncharacterized protein | ENSGALG0000001940.917388 | 12      |
| ENSGALT0000 Uncharacterized protein | ENSGALG0000001940.649519 | 0       |
| ENSGALT0000 Uncharacterized protein | ENSGALG0000001950.927729 | 1.5     |
| ENSGALT0000 Uncharacterized protein | ENSGALG0000001950.838938 | 894.5   |
| ENSGALT0000 Uncharacterized protein | ENSGALG0000001950.892817 | 27      |
| ENSGALT0000 \N                      | ENSGALG0000001950.64056  | 50.5264 |
| ENSGALT0000 Uncharacterized protein | ENSGALG000000195?        | 0       |
| ENSGALT0000 Uncharacterized protein | ENSGALG0000001950.631223 | 0       |
| ENSGALT0000 Uncharacterized protein | ENSGALG0000001950.969319 | 117.5   |
| ENSGALT0000 Uncharacterized protein | ENSGALG0000001950.794758 | 6.61621 |
| ENSGALT0000 Uncharacterized protein | ENSGALG0000001950.943934 | 2       |
| ENSGALT0000 Uncharacterized protein | ENSGALG0000001950.739931 | 215.5   |
| ENSGALT0000 Uncharacterized protein | ENSGALG0000001950.464758 | 0.5     |
| ENSGALT0000 Uncharacterized protein | ENSGALG000000195?        | 0       |
| ENSGALT0000 Uncharacterized protein | ENSGALG0000001950.603682 | 0       |
| ENSGALT0000 Uncharacterized protein | ENSGALG000000195?        | 0       |
| ENSGALT0000 Uncharacterized protein | ENSGALG0000001950.603682 | 0.5     |
| ENSGALT0000 Uncharacterized protein | ENSGALG0000001960.256049 | 2       |
| ENSGALT0000 Uncharacterized protein | ENSGALG0000001960.853673 | 9       |
| ENSGALT0000 Uncharacterized protein | ENSGALG0000001960.617737 | 15      |
| ENSGALT0000 \N                      | ENSGALG0000001960.503769 | 45.5    |
| ENSGALT0000 Uncharacterized protein | ENSGALG0000001961        | 1       |
| ENSGALT0000 \N                      | ENSGALG000000196?        | 0       |
| ENSGALT0000 Uncharacterized protein | ENSGALG0000001960.713325 | 1       |
| ENSGALT0000 Uncharacterized protein | ENSGALG0000001960.943934 | 1.5     |
| ENSGALT0000 Uncharacterized protein | ENSGALG000000196?        | 0       |
| ENSGALT0000 Uncharacterized protein | ENSGALG000000196?        | 0       |
| ENSGALT0000 Uncharacterized protein | ENSGALG0000001960.464758 | 0       |
| ENSGALT0000 Uncharacterized protein | ENSGALG0000001960.878323 | 18.5    |
| ENSGALT0000 Uncharacterized protein | ENSGALG0000001960.234072 | 13.5    |
| ENSGALT0000 Uncharacterized protein | ENSGALG000000196?        | 0       |
| ENSGALT0000 Uncharacterized protein | ENSGALG0000001960.522055 | 2.5     |
| ENSGALT0000 Uncharacterized protein | ENSGALG000000196?        | 0       |
| ENSGALT0000 Uncharacterized protein | ENSGALG0000001960.988505 | 124.5   |
| ENSGALT0000 Uncharacterized protein | ENSGALG0000001960.9344   | 11      |
| ENSGALT0000 Uncharacterized protein | ENSGALG0000001970.944548 | 23      |
| ENSGALT0000 Uncharacterized protein | ENSGALG0000001970.921918 | 242     |
| ENSGALT0000 \N                      | ENSGALG0000001970.906217 | 524.5   |
| ENSGALT0000 Uncharacterized protein | ENSGALG0000001970.983395 | 405.5   |
| ENSGALT0000 Uncharacterized protein | ENSGALG0000001970.681859 | 0.69599 |
| ENSGALT0000 Uncharacterized protein | ENSGALG0000001970.998631 | 12.5    |
| ENSGALT0000 Uncharacterized protein | ENSGALG000000197?        | 0       |
| ENSGALT0000 Uncharacterized protein | ENSGALG0000001970.995498 | 536     |
| ENSGALT0000 Uncharacterized protein | ENSGALG000000197?        | 0       |
| ENSGALT0000 Uncharacterized protein | ENSGALG0000001970.772643 | 12      |
| ENSGALT0000 Uncharacterized protein | ENSGALG0000001970.848796 | 358     |
| ENSGALT0000 Uncharacterized protein | ENSGALG0000001970.989953 | 191.5   |
| ENSGALT0000 Uncharacterized protein | ENSGALG0000001970.983333 | 44.9394 |
| ENSGALT0000 Uncharacterized protein | ENSGALG0000001970.968613 | 222.5   |
| ENSGALT0000 Uncharacterized protein | ENSGALG0000001980.408246 | 59      |
| ENSGALT0000 Uncharacterized protein | ENSGALG0000001980.828477 | 4.5     |
| ENSGALT0000 Uncharacterized protein | ENSGALG0000001980.921104 | 6.5     |
| ENSGALT0000 Uncharacterized protein | ENSGALG0000001980.535947 | 99.5    |
| ENSGALT0000 Uncharacterized protein | ENSGALG000000198?        | 0       |
| ENSGALT0000 Uncharacterized protein | ENSGALG000000198?        | 0       |
| ENSGALT0000 Wpkci                   | ENSGALG0000001980.673553 | 484.042 |

|                                     |                           |          |
|-------------------------------------|---------------------------|----------|
| ENSGALT0000 Uncharacterized protein | ENSGALG00000019E 0.371997 | 0        |
| ENSGALT0000 Uncharacterized protein | ENSGALG00000019E 0.964069 | 264.5    |
| ENSGALT0000 Uncharacterized protein | ENSGALG00000019E 0.898356 | 0.5      |
| ENSGALT0000 Uncharacterized protein | ENSGALG00000019E ?        | 0        |
| ENSGALT0000 Uncharacterized protein | ENSGALG00000019E ?        | 0        |
| ENSGALT0000 Uncharacterized protein | ENSGALG00000019E 0.694304 | 1.5      |
| ENSGALT0000 Uncharacterized protein | ENSGALG00000019E 0.464758 | 0        |
| ENSGALT0000 Uncharacterized protein | ENSGALG00000019E 0.985014 | 61.2522  |
| ENSGALT0000 Uncharacterized protein | ENSGALG00000019E 0.897015 | 5.5      |
| ENSGALT0000 Uncharacterized protein | ENSGALG00000019E ?        | 0        |
| ENSGALT0000 Uncharacterized protein | ENSGALG00000019E 0.464758 | 1        |
| ENSGALT0000 Uncharacterized protein | ENSGALG00000019E 0.464758 | 0        |
| ENSGALT0000 Uncharacterized protein | ENSGALG00000019E 0.926206 | 3.5      |
| ENSGALT0000 Uncharacterized protein | ENSGALG00000019E 0.164317 | 0        |
| ENSGALT0000 Uncharacterized protein | ENSGALG00000019E 0.649519 | 0        |
| ENSGALT0000 Uncharacterized protein | ENSGALG00000019E 0.939579 | 3.5      |
| ENSGALT0000 Uncharacterized protein | ENSGALG00000019E 0.22129  | 0        |
| ENSGALT0000 Uncharacterized protein | ENSGALG00000019E ?        | 0        |
| ENSGALT0000 Uncharacterized protein | ENSGALG00000019E 0.464758 | 0.5      |
| ENSGALT0000 Uncharacterized protein | ENSGALG00000019E 0.88535  | 152.5    |
| ENSGALT0000 Uncharacterized protein | ENSGALG00000019E 0.464758 | 0        |
| ENSGALT0000 Uncharacterized protein | ENSGALG00000019E 0.973932 | 53       |
| ENSGALT0000 Uncharacterized protein | ENSGALG00000019E 0.925241 | 386      |
| ENSGALT0000 Uncharacterized protein | ENSGALG00000019E 0.827877 | 4.5      |
| ENSGALT0000 Uncharacterized protein | ENSGALG00000019E ?        | 0        |
| ENSGALT0000 Uncharacterized protein | ENSGALG00000019E ?        | 0        |
| ENSGALT0000 Uncharacterized protein | ENSGALG00000019E ?        | 0        |
| ENSGALT0000 \N                      | ENSGALG00000020C 0.985586 | 303.724  |
| ENSGALT0000 \N                      | ENSGALG00000020C 0.934672 | 90       |
| ENSGALT0000 Uncharacterized protein | ENSGALG00000020C 0.967762 | 208.5    |
| ENSGALT0000 Uncharacterized protein | ENSGALG00000020C 0.603682 | 0.5      |
| ENSGALT0000 Uncharacterized protein | ENSGALG00000020C 0.695001 | 2        |
| ENSGALT0000 Uncharacterized protein | ENSGALG00000020C 0.853815 | 0.5      |
| ENSGALT0000 Uncharacterized protein | ENSGALG00000020C 0.980539 | 33       |
| ENSGALT0000 Uncharacterized protein | ENSGALG00000020C 0.9974   | 46       |
| ENSGALT0000 Uncharacterized protein | ENSGALG00000020C 0.994045 | 641      |
| ENSGALT0000 Uncharacterized protein | ENSGALG00000020C 0.464758 | 0        |
| ENSGALT0000 Uncharacterized protein | ENSGALG00000020C 0.631223 | 0        |
| ENSGALT0000 Uncharacterized protein | ENSGALG00000020C 0.804256 | 2        |
| ENSGALT0000 Uncharacterized protein | ENSGALG0000002010.943934  | 1        |
| ENSGALT0000 Uncharacterized protein | ENSGALG0000002010.649519  | 0        |
| ENSGALT0000 Uncharacterized protein | ENSGALG0000002010.464778  | 6.93E-05 |
| ENSGALT0000 Uncharacterized protein | ENSGALG0000002010.603682  | 0.5      |
| ENSGALT0000 Uncharacterized protein | ENSGALG000000201?         | 0        |
| ENSGALT0000 Uncharacterized protein | ENSGALG0000002010.649519  | 2        |
| ENSGALT0000 Uncharacterized protein | ENSGALG0000002010.808009  | 7.5      |
| ENSGALT0000 Uncharacterized protein | ENSGALG0000002010.913072  | 40.5     |
| ENSGALT0000 Uncharacterized protein | ENSGALG0000002011         | 0.5      |
| ENSGALT0000 Uncharacterized protein | ENSGALG0000002010.603544  | 0        |
| ENSGALT0000 Uncharacterized protein | ENSGALG000000201?         | 0        |
| ENSGALT0000 Uncharacterized protein | ENSGALG000000202 0.872196 | 31.5     |
| ENSGALT0000 Uncharacterized protein | ENSGALG000000202 0.883976 | 2008     |
| ENSGALT0000 Uncharacterized protein | ENSGALG000000202 0.973569 | 5        |
| ENSGALT0000 Uncharacterized protein | ENSGALG000000202 0.964535 | 170      |
| ENSGALT0000 Uncharacterized protein | ENSGALG000000202 0.975184 | 7.5      |
| ENSGALT0000 Uncharacterized protein | ENSGALG000000202 0.371997 | 0.5      |

|                                     |                           |         |
|-------------------------------------|---------------------------|---------|
| ENSGALT0000 Uncharacterized protein | ENSGALG000000202 0.464758 | 0       |
| ENSGALT0000 Uncharacterized protein | ENSGALG000000202 0.983109 | 11      |
| ENSGALT0000 Uncharacterized protein | ENSGALG000000202 0.649519 | 0       |
| ENSGALT0000 Uncharacterized protein | ENSGALG000000202 0.946136 | 34      |
| ENSGALT0000 Uncharacterized protein | ENSGALG000000202 ?        | 0       |
| ENSGALT0000 Uncharacterized protein | ENSGALG000000202 ?        | 0       |
| ENSGALT0000 Uncharacterized protein | ENSGALG000000202 0.757978 | 2       |
| ENSGALT0000 Uncharacterized protein | ENSGALG000000202 0.464758 | 0       |
| ENSGALT0000 Uncharacterized protein | ENSGALG000000203 0.562993 | 0.5     |
| ENSGALT0000 Uncharacterized protein | ENSGALG000000203 0.633788 | 87      |
| ENSGALT0000 Uncharacterized protein | ENSGALG000000203 0.164317 | 0       |
| ENSGALT0000 Uncharacterized protein | ENSGALG000000203 ?        | 0       |
| ENSGALT0000 Uncharacterized protein | ENSGALG000000203 0.976542 | 671.5   |
| ENSGALT0000 Uncharacterized protein | ENSGALG000000203 0.904804 | 1.5     |
| ENSGALT0000 Uncharacterized protein | ENSGALG000000203 0.521301 | 0.5     |
| ENSGALT0000 Uncharacterized protein | ENSGALG000000203 0.949697 | 251.5   |
| ENSGALT0000 Uncharacterized protein | ENSGALG000000203 0.92465  | 7.4681  |
| ENSGALT0000 Uncharacterized protein | ENSGALG000000203 0.932659 | 17.0494 |
| ENSGALT0000 Uncharacterized protein | ENSGALG000000203 0.973334 | 2.5     |
| ENSGALT0000 Uncharacterized protein | ENSGALG000000203 ?        | 0       |
| ENSGALT0000 Uncharacterized protein | ENSGALG000000203 0.293716 | 1.5     |
| ENSGALT0000 Uncharacterized protein | ENSGALG000000203 0.852698 | 432     |
| ENSGALT0000 Uncharacterized protein | ENSGALG000000203 0.888484 | 301     |
| ENSGALT0000 Uncharacterized protein | ENSGALG000000203 0.768685 | 9.5     |
| ENSGALT0000 Uncharacterized protein | ENSGALG000000203 0.998803 | 276.5   |
| ENSGALT0000 Uncharacterized protein | ENSGALG000000204 0.822838 | 3.5     |
| ENSGALT0000 Uncharacterized protein | ENSGALG000000204 0.464758 | 0       |
| ENSGALT0000 Uncharacterized protein | ENSGALG000000204 0.790147 | 1.78316 |
| ENSGALT0000 Uncharacterized protein | ENSGALG000000204 0.740073 | 17      |
| ENSGALT0000 Uncharacterized protein | ENSGALG000000204 0.978169 | 11.5    |
| ENSGALT0000 Uncharacterized protein | ENSGALG000000204 0.75681  | 140     |
| ENSGALT0000 Uncharacterized protein | ENSGALG000000204 0.440513 | 0.5     |
| ENSGALT0000 \N                      | ENSGALG000000204 0.334414 | 1       |
| ENSGALT0000 Uncharacterized protein | ENSGALG000000204 0.98774  | 174.5   |
| ENSGALT0000 Uncharacterized protein | ENSGALG000000204 0.830806 | 80.5    |
| ENSGALT0000 Uncharacterized protein | ENSGALG000000204 ?        | 0       |
| ENSGALT0000 Uncharacterized protein | ENSGALG000000204 ?        | 0       |
| ENSGALT0000 Uncharacterized protein | ENSGALG000000204 0.923519 | 4       |
| ENSGALT0000 Uncharacterized protein | ENSGALG000000204 0.603682 | 0.5     |
| ENSGALT0000 \N                      | ENSGALG000000204 0.965386 | 445.498 |
| ENSGALT0000 Uncharacterized protein | ENSGALG000000204 0.464758 | 0       |
| ENSGALT0000 Uncharacterized protein | ENSGALG000000204 0.481657 | 0.5     |
| ENSGALT0000 Uncharacterized protein | ENSGALG000000205 0.599185 | 1832.5  |
| ENSGALT0000 Uncharacterized protein | ENSGALG000000205 0.670814 | 1.5     |
| ENSGALT0000 Uncharacterized protein | ENSGALG000000205 0.998598 | 380     |
| ENSGALT0000 Uncharacterized protein | ENSGALG000000205 ?        | 0       |
| ENSGALT0000 Uncharacterized protein | ENSGALG000000205 0.993497 | 303.5   |
| ENSGALT0000 Uncharacterized protein | ENSGALG000000205 0.795041 | 6.5     |
| ENSGALT0000 Uncharacterized protein | ENSGALG000000205 0.978661 | 914     |
| ENSGALT0000 Uncharacterized protein | ENSGALG000000205 ?        | 0       |
| ENSGALT0000 Uncharacterized protein | ENSGALG000000205 0.927041 | 32.5    |
| ENSGALT0000 Uncharacterized protein | ENSGALG000000205 ?        | 0       |
| ENSGALT0000 Uncharacterized protein | ENSGALG000000205 ?        | 0       |
| ENSGALT0000 Uncharacterized protein | ENSGALG000000205 0.918442 | 70      |
| ENSGALT0000 Uncharacterized protein | ENSGALG000000205 ?        | 0       |
| ENSGALT0000 Uncharacterized protein | ENSGALG000000205 ?        | 0       |

|                                     |                           |         |
|-------------------------------------|---------------------------|---------|
| ENSGALT0000 Uncharacterized protein | ENSGALG000000205 0.840935 | 61.5    |
| ENSGALT0000 Uncharacterized protein | ENSGALG000000205 0.960312 | 20      |
| ENSGALT0000 Uncharacterized protein | ENSGALG000000206 ?        | 0       |
| ENSGALT0000 \N                      | ENSGALG000000206 ?        | 0       |
| ENSGALT0000 \N                      | ENSGALG000000206 ?        | 0       |
| ENSGALT0000 Uncharacterized protein | ENSGALG000000206 0.904804 | 2       |
| ENSGALT0000 Uncharacterized protein | ENSGALG000000206 0.898356 | 2       |
| ENSGALT0000 Uncharacterized protein | ENSGALG000000206 0.831568 | 5.5     |
| ENSGALT0000 Uncharacterized protein | ENSGALG000000206 0.895588 | 21.2642 |
| ENSGALT0000 \N                      | ENSGALG000000206 0.458282 | 70.5    |
| ENSGALT0000 Uncharacterized protein | ENSGALG000000206 0.853815 | 1.5     |
| ENSGALT0000 \N                      | ENSGALG000000206 ?        | 0       |
| ENSGALT0000 Uncharacterized protein | ENSGALG000000206 0.76267  | 35      |
| ENSGALT0000 Uncharacterized protein | ENSGALG000000206 ?        | 0       |
| ENSGALT0000 Uncharacterized protein | ENSGALG000000206 0.781247 | 70      |
| ENSGALT0000 Uncharacterized protein | ENSGALG000000206 ?        | 0       |
| ENSGALT0000 Uncharacterized protein | ENSGALG000000206 0.519752 | 3       |
| ENSGALT0000 Uncharacterized protein | ENSGALG000000206 ?        | 0       |
| ENSGALT0000 Uncharacterized protein | ENSGALG000000206 0.748922 | 145.5   |
| ENSGALT0000 \N                      | ENSGALG000000206 0.949317 | 82.9977 |
| ENSGALT0000 Uncharacterized protein | ENSGALG000000207 0.895653 | 955.818 |
| ENSGALT0000 \N                      | ENSGALG000000207 0.945393 | 173.235 |
| ENSGALT0000 Uncharacterized protein | ENSGALG000000207 0.970814 | 4       |
| ENSGALT0000 Uncharacterized protein | ENSGALG000000207 ?        | 0       |
| ENSGALT0000 Uncharacterized protein | ENSGALG000000207 ?        | 0       |
| ENSGALT0000 Uncharacterized protein | ENSGALG000000207 0.869966 | 83.5    |
| ENSGALT0000 Uncharacterized protein | ENSGALG000000207 0.649519 | 0.5     |
| ENSGALT0000 Uncharacterized protein | ENSGALG000000207 0.464758 | 0.5     |
| ENSGALT0000 Uncharacterized protein | ENSGALG000000207 0.562993 | 0       |
| ENSGALT0000 Uncharacterized protein | ENSGALG000000207 0.54868  | 0.5     |
| ENSGALT0000 Uncharacterized protein | ENSGALG000000207 ?        | 0       |
| ENSGALT0000 Uncharacterized protein | ENSGALG000000207 ?        | 0       |
| ENSGALT0000 \N                      | ENSGALG000000207 ?        | 0       |
| ENSGALT0000 Uncharacterized protein | ENSGALG000000207 0.927745 | 28      |
| ENSGALT0000 Uncharacterized protein | ENSGALG000000207 0.464758 | 0       |
| ENSGALT0000 Uncharacterized protein | ENSGALG000000207 ?        | 0       |
| ENSGALT0000 \N                      | ENSGALG000000207 0.97246  | 7       |
| ENSGALT0000 Uncharacterized protein | ENSGALG000000207 0.464758 | 0       |
| ENSGALT0000 Uncharacterized protein | ENSGALG000000207 ?        | 0       |
| ENSGALT0000 Uncharacterized protein | ENSGALG000000208 0.768934 | 8.5     |
| ENSGALT0000 Uncharacterized protein | ENSGALG000000208 0.42917  | 4       |
| ENSGALT0000 \N                      | ENSGALG000000208 ?        | 0       |
| ENSGALT0000 Uncharacterized protein | ENSGALG000000208 0.539038 | 0.5     |
| ENSGALT0000 Uncharacterized protein | ENSGALG000000208 0.849633 | 4.5     |
| ENSGALT0000 Uncharacterized protein | ENSGALG000000208 ?        | 0       |
| ENSGALT0000 Uncharacterized protein | ENSGALG000000208 ?        | 0       |
| ENSGALT0000 Uncharacterized protein | ENSGALG000000208 ?        | 0       |
| ENSGALT0000 Uncharacterized protein | ENSGALG000000208 0.153016 | 5       |
| ENSGALT0000 Uncharacterized protein | ENSGALG000000208 0.732092 | 3       |
| ENSGALT0000 Uncharacterized protein | ENSGALG000000208 0.992319 | 59.5    |
| ENSGALT0000 Uncharacterized protein | ENSGALG000000208 0.978585 | 26.5    |
| ENSGALT0000 Uncharacterized protein | ENSGALG000000208 0.832378 | 11      |
| ENSGALT0000 Uncharacterized protein | ENSGALG000000209 0.872832 | 198.5   |
| ENSGALT0000 \N                      | ENSGALG000000209 0.934681 | 221     |
| ENSGALT0000 Uncharacterized protein | ENSGALG000000209 0.710706 | 3       |
| ENSGALT0000 Uncharacterized protein | ENSGALG000000209 0.973247 | 867.977 |

|                                     |                           |         |
|-------------------------------------|---------------------------|---------|
| ENSGALT0000 Uncharacterized protein | ENSGALG000000209 0.990796 | 18      |
| ENSGALT0000 Uncharacterized protein | ENSGALG000000209 0.464758 | 0       |
| ENSGALT0000 Uncharacterized protein | ENSGALG000000209 0.951468 | 4       |
| ENSGALT0000 Uncharacterized protein | ENSGALG000000209 0.985306 | 68      |
| ENSGALT0000 Uncharacterized protein | ENSGALG000000209 0.334091 | 207.5   |
| ENSGALT0000 Uncharacterized protein | ENSGALG000000209 0.976471 | 7       |
| ENSGALT0000 Uncharacterized protein | ENSGALG000000209 0.929536 | 10      |
| ENSGALT0000 \N                      | ENSGALG000000209 0.266552 | 1.5     |
| ENSGALT0000 Uncharacterized protein | ENSGALG000000209 0.855454 | 13.5    |
| ENSGALT0000 Uncharacterized protein | ENSGALG000000209 0.464758 | 0.5     |
| ENSGALT0000 Uncharacterized protein | ENSGALG000000209 0.841582 | 44      |
| ENSGALT0000 Uncharacterized protein | ENSGALG000000209 0.431456 | 194.708 |
| ENSGALT0000 Uncharacterized protein | ENSGALG000000209 0.142232 | 669.458 |
| ENSGALT0000 Uncharacterized protein | ENSGALG000000210 0.894545 | 625.5   |
| ENSGALT0000 \N                      | ENSGALG000000210 0.900995 | 16.8941 |
| ENSGALT0000 Uncharacterized protein | ENSGALG000000210 ?        | 0       |
| ENSGALT0000 \N                      | ENSGALG000000210 0.989766 | 132.533 |
| ENSGALT0000 Uncharacterized protein | ENSGALG000000210 0.905192 | 3       |
| ENSGALT0000 Uncharacterized protein | ENSGALG000000210 ?        | 0       |
| ENSGALT0000 \N                      | ENSGALG000000210 0.974282 | 721.5   |
| ENSGALT0000 Uncharacterized protein | ENSGALG000000210 0.164317 | 3       |
| ENSGALT0000 Uncharacterized protein | ENSGALG000000210 ?        | 0       |
| ENSGALT0000 Uncharacterized protein | ENSGALG000000210 0.649519 | 0       |
| ENSGALT0000 Uncharacterized protein | ENSGALG000000210 ?        | 0       |
| ENSGALT0000 Uncharacterized protein | ENSGALG000000210 0.551931 | 0.01801 |
| ENSGALT0000 Uncharacterized protein | ENSGALG000000210 ?        | 0       |
| ENSGALT0000 Uncharacterized protein | ENSGALG000000210 0.454618 | 0.5     |
| ENSGALT0000 Uncharacterized protein | ENSGALG000000210 0.479015 | 9       |
| ENSGALT0000 Uncharacterized protein | ENSGALG000000210 ?        | 0       |
| ENSGALT0000 Uncharacterized protein | ENSGALG000000211 0.16225  | 193.5   |
| ENSGALT0000 Uncharacterized protein | ENSGALG000000211 0.877819 | 22.5    |
| ENSGALT0000 Uncharacterized protein | ENSGALG000000211 0.649519 | 0.5     |
| ENSGALT0000 Uncharacterized protein | ENSGALG000000211 0.805033 | 1       |
| ENSGALT0000 Uncharacterized protein | ENSGALG000000211 0.901223 | 2.5     |
| ENSGALT0000 Uncharacterized protein | ENSGALG000000211 ?        | 0       |
| ENSGALT0000 Uncharacterized protein | ENSGALG000000211 0.763269 | 5       |
| ENSGALT0000 Uncharacterized protein | ENSGALG000000211 0.842903 | 11.5    |
| ENSGALT0000 Uncharacterized protein | ENSGALG000000211 0.464758 | 0       |
| ENSGALT0000 Uncharacterized protein | ENSGALG000000211 0.868841 | 88.0331 |
| ENSGALT0000 Uncharacterized protein | ENSGALG000000211 ?        | 0       |
| ENSGALT0000 Uncharacterized protein | ENSGALG000000211 0.549507 | 3.5     |
| ENSGALT0000 Uncharacterized protein | ENSGALG000000211 ?        | 0       |
| ENSGALT0000 Uncharacterized protein | ENSGALG000000211 ?        | 0       |
| ENSGALT0000 Uncharacterized protein | ENSGALG000000211 0.943574 | 282     |
| ENSGALT0000 Uncharacterized protein | ENSGALG000000211 0.898356 | 2       |
| ENSGALT0000 Uncharacterized protein | ENSGALG000000212 0.960915 | 3.5     |
| ENSGALT0000 Uncharacterized protein | ENSGALG000000212 0.905051 | 32.5    |
| ENSGALT0000 Uncharacterized protein | ENSGALG000000212 0.649017 | 4       |
| ENSGALT0000 Uncharacterized protein | ENSGALG000000212 0.649519 | 0.5     |
| ENSGALT0000 \N                      | ENSGALG000000212 0.805673 | 29.2453 |
| ENSGALT0000 Uncharacterized protein | ENSGALG000000212 0.259853 | 2       |
| ENSGALT0000 \N                      | ENSGALG000000212 0.958187 | 422.497 |
| ENSGALT0000 Uncharacterized protein | ENSGALG000000212 ?        | 0       |
| ENSGALT0000 Uncharacterized protein | ENSGALG000000212 0.321666 | 1.5     |
| ENSGALT0000 Uncharacterized protein | ENSGALG000000212 0.984143 | 12      |
| ENSGALT0000 Uncharacterized protein | ENSGALG000000212 0.464758 | 0       |



|                                     |                          |         |
|-------------------------------------|--------------------------|---------|
| ENSGALT0000 Uncharacterized protein | ENSGALG000000212?        | 0       |
| ENSGALT0000 Uncharacterized protein | ENSGALG0000002120.911642 | 4.5     |
| ENSGALT0000 \N                      | ENSGALG0000002120.977755 | 401.687 |
| ENSGALT0000 Uncharacterized protein | ENSGALG0000002120.829421 | 5       |
| ENSGALT0000 Uncharacterized protein | ENSGALG0000002130.818488 | 2       |
| ENSGALT0000 Uncharacterized protein | ENSGALG0000002130.900037 | 8       |
| ENSGALT0000 Uncharacterized protein | ENSGALG0000002130.649519 | 0       |
| ENSGALT0000 Uncharacterized protein | ENSGALG000000213?        | 0       |
| ENSGALT0000 Uncharacterized protein | ENSGALG0000002130.897228 | 71.0001 |
| ENSGALT0000 Uncharacterized protein | ENSGALG0000002130.560266 | 10      |
| ENSGALT0000 Uncharacterized protein | ENSGALG0000002130.91364  | 4       |
| ENSGALT0000 Uncharacterized protein | ENSGALG0000002130.962949 | 252     |
| ENSGALT0000 Uncharacterized protein | ENSGALG0000002130.934485 | 9.5     |
| ENSGALT0000 Uncharacterized protein | ENSGALG0000002130.988772 | 99.367  |
| ENSGALT0000 Uncharacterized protein | ENSGALG0000002130.870587 | 35      |
| ENSGALT0000 Uncharacterized protein | ENSGALG0000002130.828826 | 3       |
| ENSGALT0000 Uncharacterized protein | ENSGALG0000002130.949411 | 335.279 |
| ENSGALT0000 Uncharacterized protein | ENSGALG0000002130.838464 | 22.5    |
| ENSGALT0000 Uncharacterized protein | ENSGALG0000002130.626351 | 3.5     |
| ENSGALT0000 Uncharacterized protein | ENSGALG0000002130.921728 | 6       |
| ENSGALT0000 Uncharacterized protein | ENSGALG0000002130.86208  | 37.0488 |
| ENSGALT0000 Uncharacterized protein | ENSGALG0000002130.524047 | 0.5     |
| ENSGALT0000 Uncharacterized protein | ENSGALG0000002130.524047 | 0       |
| ENSGALT0000 Uncharacterized protein | ENSGALG0000002130.861596 | 4       |
| ENSGALT0000 Uncharacterized protein | ENSGALG0000002140.971387 | 136     |
| ENSGALT0000 Uncharacterized protein | ENSGALG0000002140.942436 | 250.612 |
| ENSGALT0000 Uncharacterized protein | ENSGALG0000002140.683403 | 2       |
| ENSGALT0000 Uncharacterized protein | ENSGALG000000214?        | 0       |
| ENSGALT0000 Uncharacterized protein | ENSGALG0000002140.773466 | 1328    |
| ENSGALT0000 Uncharacterized protein | ENSGALG0000002140.923009 | 319     |
| ENSGALT0000 Uncharacterized protein | ENSGALG0000002140.87901  | 28.5    |
| ENSGALT0000 \N                      | ENSGALG0000002140.827601 | 364.389 |
| ENSGALT0000 Uncharacterized protein | ENSGALG0000002140.65196  | 5.25561 |
| ENSGALT0000 Uncharacterized protein | ENSGALG000000214?        | 0       |
| ENSGALT0000 Uncharacterized protein | ENSGALG0000002140.947712 | 62.5    |
| ENSGALT0000 Uncharacterized protein | ENSGALG0000002140.649519 | 0.5     |
| ENSGALT0000 Uncharacterized protein | ENSGALG0000002140.843971 | 3632.64 |
| ENSGALT0000 Uncharacterized protein | ENSGALG0000002140.813142 | 8       |
| ENSGALT0000 Uncharacterized protein | ENSGALG0000002140.876088 | 1.5     |
| ENSGALT0000 Uncharacterized protein | ENSGALG0000002140.994016 | 1131    |
| ENSGALT0000 Uncharacterized protein | ENSGALG000000214?        | 0       |
| ENSGALT0000 Uncharacterized protein | ENSGALG0000002150.733311 | 8.5     |
| ENSGALT0000 Uncharacterized protein | ENSGALG000000215?        | 0       |
| ENSGALT0000 Uncharacterized protein | ENSGALG000000215?        | 0       |
| ENSGALT0000 Uncharacterized protein | ENSGALG000000215?        | 0       |
| ENSGALT0000 Uncharacterized protein | ENSGALG000000215?        | 0       |
| ENSGALT0000 Uncharacterized protein | ENSGALG0000002150.751212 | 9.5     |
| ENSGALT0000 Uncharacterized protein | ENSGALG0000002150.913631 | 6       |
| ENSGALT0000 Uncharacterized protein | ENSGALG0000002150.649519 | 0.5     |
| ENSGALT0000 Uncharacterized protein | ENSGALG0000002150.904804 | 3       |
| ENSGALT0000 Uncharacterized protein | ENSGALG0000002150.464758 | 1       |
| ENSGALT0000 Uncharacterized protein | ENSGALG0000002150.464758 | 0.5     |
| ENSGALT0000 Uncharacterized protein | ENSGALG000000215?        | 0       |
| ENSGALT0000 Uncharacterized protein | ENSGALG0000002150.604939 | 35.5    |
| ENSGALT0000 Uncharacterized protein | ENSGALG0000002150.878364 | 302.602 |
| ENSGALT0000 Uncharacterized protein | ENSGALG0000002150.905678 | 30      |

|                                     |                           |         |
|-------------------------------------|---------------------------|---------|
| ENSGALT0000 Uncharacterized protein | ENSGALG000000215 0.722779 | 1.57482 |
| ENSGALT0000 Uncharacterized protein | ENSGALG000000216 0.776644 | 28      |
| ENSGALT0000 Uncharacterized protein | ENSGALG000000216 0.649519 | 0.5     |
| ENSGALT0000 Uncharacterized protein | ENSGALG000000216 0.464758 | 0       |
| ENSGALT0000 Uncharacterized protein | ENSGALG000000216 0.562993 | 0       |
| ENSGALT0000 \N                      | ENSGALG000000216 0.977843 | 2745.92 |
| ENSGALT0000 Uncharacterized protein | ENSGALG000000216 ?        | 0       |
| ENSGALT0000 Uncharacterized protein | ENSGALG000000216 0.989305 | 7       |
| ENSGALT0000 Uncharacterized protein | ENSGALG000000216 0.363607 | 1.5     |
| ENSGALT0000 Uncharacterized protein | ENSGALG000000216 0.164317 | 3       |
| ENSGALT0000 Uncharacterized protein | ENSGALG000000216 0.464758 | 0       |
| ENSGALT0000 Uncharacterized protein | ENSGALG000000216 0.955824 | 36.5    |
| ENSGALT0000 Uncharacterized protein | ENSGALG000000216 0.993795 | 98.5    |
| ENSGALT0000 Uncharacterized protein | ENSGALG000000216 0.908886 | 3004    |
| ENSGALT0000 \N                      | ENSGALG000000217 0.939561 | 45.5    |
| ENSGALT0000 \N                      | ENSGALG000000217 0.918194 | 25      |
| ENSGALT0000 \N                      | ENSGALG000000217 0.865959 | 23.5    |
| ENSGALT0000 Uncharacterized protein | ENSGALG000000217 0.824825 | 8792.34 |
| ENSGALT0000 Uncharacterized protein | ENSGALG000000217 0.776975 | 21380.3 |
| ENSGALT0000 \N                      | ENSGALG000000217 ?        | 0       |
| ENSGALT0000 \N                      | ENSGALG000000218 ?        | 0       |
| ENSGALT0000 \N                      | ENSGALG000000218 0.464758 | 0       |
| ENSGALT0000 \N                      | ENSGALG000000218 0.295035 | 0.5     |
| ENSGALT0000 Uncharacterized protein | ENSGALG000000218 0.573157 | 3       |
| ENSGALT0000 Uncharacterized protein | ENSGALG000000218 0.693451 | 36.5    |
| ENSGALT0000 Uncharacterized protein | ENSGALG000000218 0.902541 | 23.5    |
| ENSGALT0000 Uncharacterized protein | ENSGALG000000218 0.952361 | 73      |
| ENSGALT0000 Uncharacterized protein | ENSGALG000000218 0.707664 | 0.5     |
| ENSGALT0000 Uncharacterized protein | ENSGALG000000218 0.838244 | 11.5    |
| ENSGALT0000 Uncharacterized protein | ENSGALG000000218 0.464758 | 0       |
| ENSGALT0000 Uncharacterized protein | ENSGALG000000218 0.865869 | 5.5     |
| ENSGALT0000 Uncharacterized protein | ENSGALG000000218 ?        | 0       |
| ENSGALT0000 Uncharacterized protein | ENSGALG000000218 0.740073 | 2       |
| ENSGALT0000 Uncharacterized protein | ENSGALG000000218 ?        | 0       |
| ENSGALT0000 Uncharacterized protein | ENSGALG000000218 ?        | 0       |
| ENSGALT0000 Uncharacterized protein | ENSGALG000000218 ?        | 0       |
| ENSGALT0000 Uncharacterized protein | ENSGALG000000218 0.849179 | 3.5     |
| ENSGALT0000 Uncharacterized protein | ENSGALG000000218 0.80973  | 120.765 |
| ENSGALT0000 Uncharacterized protein | ENSGALG000000218 0.844522 | 43.6718 |
| ENSGALT0000 Uncharacterized protein | ENSGALG000000218 0.717591 | 3       |
| ENSGALT0000 Uncharacterized protein | ENSGALG000000218 0.971293 | 1.5     |
| ENSGALT0000 Uncharacterized protein | ENSGALG000000218 0.464758 | 0       |
| ENSGALT0000 Uncharacterized protein | ENSGALG000000218 0.464758 | 0       |
| ENSGALT0000 Uncharacterized protein | ENSGALG000000218 ?        | 0       |
| ENSGALT0000 Uncharacterized protein | ENSGALG000000218 0.985672 | 172     |
| ENSGALT0000 Uncharacterized protein | ENSGALG000000218 1        | 0.5     |
| ENSGALT0000 Uncharacterized protein | ENSGALG000000218 ?        | 0       |
| ENSGALT0000 Uncharacterized protein | ENSGALG000000218 0.75823  | 697     |
| ENSGALT0000 Uncharacterized protein | ENSGALG000000218 0.943197 | 12.5    |
| ENSGALT0000 Uncharacterized protein | ENSGALG000000218 0.966761 | 10.5    |
| ENSGALT0000 Uncharacterized protein | ENSGALG000000218 0.968588 | 5       |
| ENSGALT0000 Uncharacterized protein | ENSGALG000000218 0.641172 | 270.5   |
| ENSGALT0000 Uncharacterized protein | ENSGALG000000218 0.464758 | 0       |
| ENSGALT0000 Uncharacterized protein | ENSGALG000000218 0.986214 | 281.5   |
| ENSGALT0000 Uncharacterized protein | ENSGALG000000218 0.967185 | 501.5   |
| ENSGALT0000 Uncharacterized protein | ENSGALG000000218 0.711475 | 30      |

|                                     |                             |         |
|-------------------------------------|-----------------------------|---------|
| ENSGALT0000 Uncharacterized protein | ENSGALG00000021ε 0.94454    | 258.5   |
| ENSGALT0000 Uncharacterized protein | ENSGALG00000021ε 0.536096   | 383     |
| ENSGALT0000 Uncharacterized protein | ENSGALG00000021ε 0.91124    | 56.5    |
| ENSGALT0000 Uncharacterized protein | ENSGALG00000021ε 0.631223   | 1.5     |
| ENSGALT0000 Uncharacterized protein | ENSGALG00000021ε 0.922605   | 41      |
| ENSGALT0000 Uncharacterized protein | ENSGALG00000021ε 0.734344   | 2.5     |
| ENSGALT0000 Uncharacterized protein | ENSGALG00000021ε 0.649519   | 0       |
| ENSGALT0000 Uncharacterized protein | ENSGALG00000021ε 0.999427   | 188     |
| ENSGALT0000 Uncharacterized protein | ENSGALG00000021ε 0.935362   | 27      |
| ENSGALT0000 Uncharacterized protein | ENSGALG00000021ε 0.850564   | 14      |
| ENSGALT0000 Uncharacterized protein | ENSGALG00000021ε 0.760726   | 0.5     |
| ENSGALT0000 Uncharacterized protein | ENSGALG00000021ε 0.0697923  | 11.5    |
| ENSGALT0000 Uncharacterized protein | ENSGALG00000021ε 0.983168   | 437.5   |
| ENSGALT0000 Uncharacterized protein | ENSGALG00000021ε 0.950858   | 28.5    |
| ENSGALT0000 Uncharacterized protein | ENSGALG00000021ε 0.711172   | 154     |
| ENSGALT0000 Uncharacterized protein | ENSGALG00000021ε 0.935842   | 2.5     |
| ENSGALT0000 Uncharacterized protein | ENSGALG00000021ε 0.983418   | 11.5    |
| ENSGALT0000 Uncharacterized protein | ENSGALG00000021ε 0.519157   | 13.5    |
| ENSGALT0000 Uncharacterized protein | ENSGALG00000021ε 0.464758   | 0       |
| ENSGALT0000 Uncharacterized protein | ENSGALG00000021ε 0.935636   | 671.001 |
| ENSGALT0000 Uncharacterized protein | ENSGALG00000021ε 0.464758   | 0       |
| ENSGALT0000 Uncharacterized protein | ENSGALG00000021ε 0.671225   | 6       |
| ENSGALT0000 Uncharacterized protein | ENSGALG00000021ε 0.949888   | 27      |
| ENSGALT0000 Uncharacterized protein | ENSGALG00000021ε 0.988586   | 10142   |
| ENSGALT0000 Uncharacterized protein | ENSGALG00000021ε 0.603682   | 1       |
| ENSGALT0000 Uncharacterized protein | ENSGALG00000021ε 0.603682   | 0       |
| ENSGALT0000 Uncharacterized protein | ENSGALG00000021ε 0.811006   | 12.5    |
| ENSGALT0000 Uncharacterized protein | ENSGALG00000021ε 0.603682   | 1       |
| ENSGALT0000 Uncharacterized protein | ENSGALG00000021ε 0.722937   | 10      |
| ENSGALT0000 Uncharacterized protein | ENSGALG00000021ε 0.268923   | 9.5     |
| ENSGALT0000 Uncharacterized protein | ENSGALG00000021ε 0.836025   | 380.5   |
| ENSGALT0000 Uncharacterized protein | ENSGALG00000021ε 0.577222   | 235     |
| ENSGALT0000 Uncharacterized protein | ENSGALG00000021ε 0.973575   | 46.5    |
| ENSGALT0000 Uncharacterized protein | ENSGALG00000021ε 0.464758   | 0       |
| ENSGALT0000 Uncharacterized protein | ENSGALG00000021ε ?          | 0       |
| ENSGALT0000 Uncharacterized protein | ENSGALG00000021ε ?          | 0       |
| ENSGALT0000 Uncharacterized protein | ENSGALG00000021ε 0.692617   | 2.5     |
| ENSGALT0000 Uncharacterized protein | ENSGALG00000021ε 0.899491   | 5       |
| ENSGALT0000 Uncharacterized protein | ENSGALG00000021ε 0.882078   | 8       |
| ENSGALT0000 Uncharacterized protein | ENSGALG00000021ε 0.940632   | 271.5   |
| ENSGALT0000 Uncharacterized protein | ENSGALG00000021ε ?          | 0       |
| ENSGALT0000 Uncharacterized protein | ENSGALG00000021ε 0.948227   | 84      |
| ENSGALT0000 Uncharacterized protein | ENSGALG00000021ε 0.464758   | 0.5     |
| ENSGALT0000 Uncharacterized protein | ENSGALG00000021ε 0.649519   | 0       |
| ENSGALT0000 Uncharacterized protein | ENSGALG00000021ε 0.619353   | 9       |
| ENSGALT0000 Uncharacterized protein | ENSGALG00000021ε 0.464758   | 0       |
| ENSGALT0000 \N                      | ENSGALG00000021ε ?          | 0       |
| ENSGALT0000 \N                      | ENSGALG00000021ε 0.720484   | 290     |
| ENSGALT0000 \N                      | ENSGALG00000021ε 0.333733   | 1.67968 |
| ENSGALT0000 \N                      | ENSGALG00000021ε 0.767232   | 4.5     |
| ENSGALT0000 \N                      | ENSGALG00000021ε 0.861186   | 3.0225  |
| ENSGALT0000 \N                      | ENSGALG00000021ε ?          | 0       |
| ENSGALT0000 \N                      | ENSGALG00000021ε ?          | 0       |
| ENSGALT0000 \N                      | ENSGALG00000021ε ?          | 0       |
| ENSGALT0000 \N                      | ENSGALG00000021ε 0.464758   | 0       |
| ENSGALT0000 \N                      | ENSGALG00000021ε 0.00026386 | 0       |

|                                     |                           |          |
|-------------------------------------|---------------------------|----------|
| ENSGALT0000 \N                      | ENSGALG00000021? ?        | 0        |
| ENSGALT0000 \N                      | ENSGALG00000021? 0.464758 | 1.82E-32 |
| ENSGALT0000 \N                      | ENSGALG00000021? 0.481371 | 0.1748   |
| ENSGALT0000 \N                      | ENSGALG00000021? 0.421915 | 81.1998  |
| ENSGALT0000 \N                      | ENSGALG00000021? 0.87793  | 5.59496  |
| ENSGALT0000 \N                      | ENSGALG00000021? 0.6078   | 0.01033  |
| ENSGALT0000 \N                      | ENSGALG00000021? 0.943134 | 92.3999  |
| ENSGALT0000 \N                      | ENSGALG00000021? ?        | 0        |
| ENSGALT0000 \N                      | ENSGALG00000021? 0.813438 | 20       |
| ENSGALT0000 \N                      | ENSGALG00000021? 0.91351  | 22.478   |
| ENSGALT0000 \N                      | ENSGALG00000021? 0.970773 | 18.1236  |
| ENSGALT0000 \N                      | ENSGALG00000021? 0.475507 | 1.64E-06 |
| ENSGALT0000 \N                      | ENSGALG00000021? 0.464758 | 0        |
| ENSGALT0000 \N                      | ENSGALG00000021? ?        | 0        |
| ENSGALT0000 \N                      | ENSGALG00000021? ?        | 0        |
| ENSGALT0000 \N                      | ENSGALG00000021? 0.934962 | 52.8077  |
| ENSGALT0000 \N                      | ENSGALG00000021? 0.464758 | 0.87555  |
| ENSGALT0000 \N                      | ENSGALG00000021? 0.477174 | 6.91E-08 |
| ENSGALT0000 \N                      | ENSGALG00000021? ?        | 0        |
| ENSGALT0000 \N                      | ENSGALG00000021? 0.5533   | 1.34357  |
| ENSGALT0000 \N                      | ENSGALG00000021? 0.464758 | 0        |
| ENSGALT0000 \N                      | ENSGALG00000021? 0.476596 | 0.00141  |
| ENSGALT0000 \N                      | ENSGALG00000021? 0.464758 | 0.16609  |
| ENSGALT0000 \N                      | ENSGALG00000021? 0.567111 | 0.10681  |
| ENSGALT0000 \N                      | ENSGALG00000021? 0.993468 | 25.6712  |
| ENSGALT0000 \N                      | ENSGALG00000021? 0.741566 | 4        |
| ENSGALT0000 \N                      | ENSGALG00000021? 0.972732 | 0.80583  |
| ENSGALT0000 Uncharacterized protein | ENSGALG00000021? 0.569146 | 0.31467  |
| ENSGALT0000 \N                      | ENSGALG00000021? 0.965313 | 72.6224  |
| ENSGALT0000 \N                      | ENSGALG00000021? 0.4838   | 0.00502  |
| ENSGALT0000 \N                      | ENSGALG00000021? 0.689479 | 4.5      |
| ENSGALT0000 \N                      | ENSGALG00000022? 0.685312 | 146.5    |
| ENSGALT0000 \N                      | ENSGALG00000022? 0.813069 | 22.5     |
| ENSGALT0000 \N                      | ENSGALG00000022? 0.464758 | 3.07E-09 |
| ENSGALT0000 \N                      | ENSGALG00000022? 0.637146 | 11.3275  |
| ENSGALT0000 \N                      | ENSGALG00000022? ?        | 0        |
| ENSGALT0000 \N                      | ENSGALG00000022? 0.859025 | 175      |
| ENSGALT0000 \N                      | ENSGALG00000022? 0.476596 | 0.00141  |
| ENSGALT0000 \N                      | ENSGALG00000022? 0.649428 | 0        |
| ENSGALT0000 \N                      | ENSGALG00000022? 0.751341 | 3.10405  |
| ENSGALT0000 \N                      | ENSGALG00000022? ?        | 0        |
| ENSGALT0000 \N                      | ENSGALG00000022? ?        | 0        |
| ENSGALT0000 \N                      | ENSGALG00000022? ?        | 0        |
| ENSGALT0000 \N                      | ENSGALG00000022? 0.464365 | 1.49E-06 |
| ENSGALT0000 Olfactory receptor OR29 | ENSGALG00000022? 0.464758 | 0        |
| ENSGALT0000 \N                      | ENSGALG00000022? ?        | 0        |
| ENSGALT0000 \N                      | ENSGALG00000022? 0.481195 | 4.96E-20 |
| ENSGALT0000 \N                      | ENSGALG00000022? 0.910566 | 126.5    |
| ENSGALT0000 \N                      | ENSGALG00000022? 0.464758 | 2.45E-07 |
| ENSGALT0000 \N                      | ENSGALG00000022? 0.707166 | 106.036  |
| ENSGALT0000 \N                      | ENSGALG00000022? 0.995583 | 14.3923  |
| ENSGALT0000 \N                      | ENSGALG00000022? 0.783903 | 135.5    |
| ENSGALT0000 \N                      | ENSGALG00000022? 0.851278 | 2.46423  |
| ENSGALT0000 \N                      | ENSGALG00000022? 0.892147 | 9.1772   |
| ENSGALT0000 \N                      | ENSGALG00000022? 0.464758 | 4.02E-42 |
| ENSGALT0000 \N                      | ENSGALG00000022? 0.806422 | 31       |

|                                     |                             |          |
|-------------------------------------|-----------------------------|----------|
| ENSGALT0000 \N                      | ENSGALG00000022C 0.439528   | 2.05751  |
| ENSGALT0000 \N                      | ENSGALG00000022C 0.464758   | 0        |
| ENSGALT0000 \N                      | ENSGALG00000022C 0.849631   | 14.4113  |
| ENSGALT0000 \N                      | ENSGALG00000022C ?          | 0        |
| ENSGALT0000 \N                      | ENSGALG00000022C ?          | 0        |
| ENSGALT0000 \N                      | ENSGALG00000022C 0.469968   | 1.39E-09 |
| ENSGALT0000 \N                      | ENSGALG00000022C 0.864562   | 1056.5   |
| ENSGALT0000 Olfactory receptor OR37 | ENSGALG00000022C 0.464758   | 1.17E-08 |
| ENSGALT0000 \N                      | ENSGALG00000022C 0.547652   | 0.86266  |
| ENSGALT0000 \N                      | ENSGALG00000022C 0.823299   | 136      |
| ENSGALT0000 \N                      | ENSGALG00000022C 0.800182   | 1.84133  |
| ENSGALT0000 \N                      | ENSGALG00000022C 0.846823   | 9.14139  |
| ENSGALT0000 \N                      | ENSGALG00000022C 0.464758   | 0.5      |
| ENSGALT0000 \N                      | ENSGALG00000022C 0.624727   | 3.70E-16 |
| ENSGALT0000 \N                      | ENSGALG00000022C 0.993896   | 146.5    |
| ENSGALT0000 \N                      | ENSGALG00000022C 0.464758   | 0        |
| ENSGALT0000 \N                      | ENSGALG00000022C 0.988633   | 72.4293  |
| ENSGALT0000 \N                      | ENSGALG00000022C 0.464758   | 8.59E-09 |
| ENSGALT0000 \N                      | ENSGALG00000022C ?          | 2.97E-38 |
| ENSGALT0000 \N                      | ENSGALG00000022C 0.464758   | 9.72E-25 |
| ENSGALT0000 \N                      | ENSGALG00000022C ?          | 0        |
| ENSGALT0000 \N                      | ENSGALG00000022C ?          | 0        |
| ENSGALT0000 \N                      | ENSGALG00000022C ?          | 0        |
| ENSGALT0000 \N                      | ENSGALG00000022C ?          | 0        |
| ENSGALT0000 \N                      | ENSGALG00000022C ?          | 0        |
| ENSGALT0000 \N                      | ENSGALG00000022C 0.471066   | 0.04363  |
| ENSGALT0000 \N                      | ENSGALG00000022C ?          | 0        |
| ENSGALT0000 \N                      | ENSGALG00000022C 0.464758   | 6.84E-09 |
| ENSGALT0000 \N                      | ENSGALG00000022C 0.981683   | 272.571  |
| ENSGALT0000 \N                      | ENSGALG00000022C 0.980556   | 175.705  |
| ENSGALT0000 \N                      | ENSGALG00000022C 0.688681   | 0.16523  |
| ENSGALT0000 \N                      | ENSGALG00000022C 0.464844   | 0.00263  |
| ENSGALT0000 \N                      | ENSGALG00000022C 0.464758   | 0        |
| ENSGALT0000 \N                      | ENSGALG00000022C 0.851878   | 12.7443  |
| ENSGALT0000 \N                      | ENSGALG00000022C 0.999775   | 1295.66  |
| ENSGALT0000 \N                      | ENSGALG00000022C 0.643881   | 29.0638  |
| ENSGALT0000 \N                      | ENSGALG00000022C 0.00525607 | 0        |
| ENSGALT0000 \N                      | ENSGALG00000022C 0.635464   | 1.92087  |
| ENSGALT0000 \N                      | ENSGALG00000022C ?          | 0        |
| ENSGALT0000 \N                      | ENSGALG00000022C ?          | 0        |
| ENSGALT0000 \N                      | ENSGALG00000022C 0.464758   | 0        |
| ENSGALT0000 \N                      | ENSGALG00000022C ?          | 0        |
| ENSGALT0000 \N                      | ENSGALG00000022C 0.919529   | 237      |
| ENSGALT0000 \N                      | ENSGALG00000022C 0.914911   | 200.537  |
| ENSGALT0000 \N                      | ENSGALG00000022C 0.516758   | 7.90E-26 |
| ENSGALT0000 \N                      | ENSGALG00000022C 0.981642   | 111.5    |
| ENSGALT0000 \N                      | ENSGALG00000022C 0.872961   | 1.01429  |
| ENSGALT0000 Olfactory receptor OR8  | ENSGALG00000022C 0.464758   | 2.06E-07 |
| ENSGALT0000 \N                      | ENSGALG00000022C 0.986808   | 133.915  |
| ENSGALT0000 \N                      | ENSGALG00000022C 0.819336   | 175.5    |
| ENSGALT0000 \N                      | ENSGALG00000022C 0.975765   | 270.957  |
| ENSGALT0000 \N                      | ENSGALG00000022C 0.257865   | 32218.5  |
| ENSGALT0000 \N                      | ENSGALG00000022C 0.990903   | 63.3526  |
| ENSGALT0000 \N                      | ENSGALG00000022C 0.467629   | 0.76906  |
| ENSGALT0000 \N                      | ENSGALG00000022C ?          | 7.11E-25 |
| ENSGALT0000 \N                      | ENSGALG00000022C ?          | 0        |

|                                     |                             |          |
|-------------------------------------|-----------------------------|----------|
| ENSGALT0000 \N                      | ENSGALG00000022C 0.76667    | 1.21434  |
| ENSGALT0000 \N                      | ENSGALG00000022C 0.785397   | 139.5    |
| ENSGALT0000 Uncharacterized protein | ENSGALG00000022C 0.464758   | 0.16667  |
| ENSGALT0000 \N                      | ENSGALG00000022C 0.491198   | 0.02786  |
| ENSGALT0000 \N                      | ENSGALG00000022C 0.464758   | 0        |
| ENSGALT0000 \N                      | ENSGALG00000022C ?          | 0        |
| ENSGALT0000 \N                      | ENSGALG00000022C 0.81033    | 26.5635  |
| ENSGALT0000 \N                      | ENSGALG00000022C 0.960235   | 210.074  |
| ENSGALT0000 \N                      | ENSGALG00000022C 0.97715    | 47.7617  |
| ENSGALT0000 \N                      | ENSGALG00000022C 0.90773    | 3        |
| ENSGALT0000 \N                      | ENSGALG00000022C 0.46703    | 0.00398  |
| ENSGALT0000 \N                      | ENSGALG00000022C 0.464552   | 6.08E-14 |
| ENSGALT0000 \N                      | ENSGALG00000022C 0.801962   | 0.52691  |
| ENSGALT0000 \N                      | ENSGALG00000022C 0.354477   | 2.76E-09 |
| ENSGALT0000 \N                      | ENSGALG0000002210.286494    | 195.072  |
| ENSGALT0000 \N                      | ENSGALG000000221?           | 1.08E-22 |
| ENSGALT0000 \N                      | ENSGALG000000221?           | 1.56E-19 |
| ENSGALT0000 \N                      | ENSGALG0000002210.464758    | 8.34E-11 |
| ENSGALT0000 \N                      | ENSGALG0000002210.640525    | 0        |
| ENSGALT0000 \N                      | ENSGALG0000002210.127045    | 1.14E-28 |
| ENSGALT0000 \N                      | ENSGALG0000002210.436506    | 352      |
| ENSGALT0000 \N                      | ENSGALG0000002210.464758    | 9.11E-44 |
| ENSGALT0000 \N                      | ENSGALG0000002210.464758    | 0        |
| ENSGALT0000 \N                      | ENSGALG0000002210.837074    | 3.85793  |
| ENSGALT0000 \N                      | ENSGALG000000221?           | 9.11E-44 |
| ENSGALT0000 \N                      | ENSGALG0000002210.958056    | 10.9186  |
| ENSGALT0000 \N                      | ENSGALG000000221?           | 0        |
| ENSGALT0000 \N                      | ENSGALG0000002210.981992    | 3.74966  |
| ENSGALT0000 Olfactory receptor OR6  | ENSGALG000000221?           | 0        |
| ENSGALT0000 \N                      | ENSGALG0000002210.464758    | 0.99368  |
| ENSGALT0000 \N                      | ENSGALG0000002210.970818    | 283      |
| ENSGALT0000 \N                      | ENSGALG0000002210.92064     | 463.826  |
| ENSGALT0000 \N                      | ENSGALG000000221?           | 0        |
| ENSGALT0000 \N                      | ENSGALG0000002210.464758    | 0.28822  |
| ENSGALT0000 \N                      | ENSGALG0000002210.466137    | 0.74346  |
| ENSGALT0000 \N                      | ENSGALG0000002210.894077    | 50.438   |
| ENSGALT0000 \N                      | ENSGALG0000002210.46329     | 0.00038  |
| ENSGALT0000 \N                      | ENSGALG0000002210.575742    | 0.0004   |
| ENSGALT0000 \N                      | ENSGALG0000002210.464758    | 3.29E-15 |
| ENSGALT0000 \N                      | ENSGALG0000002210.453278    | 3.38533  |
| ENSGALT0000 \N                      | ENSGALG000000221?           | 0        |
| ENSGALT0000 \N                      | ENSGALG000000221?           | 0        |
| ENSGALT0000 \N                      | ENSGALG0000002210.760049    | 6.01135  |
| ENSGALT0000 \N                      | ENSGALG0000002210.999439    | 196.54   |
| ENSGALT0000 \N                      | ENSGALG0000002210.238589    | 279      |
| ENSGALT0000 \N                      | ENSGALG0000002210.980343    | 45       |
| ENSGALT0000 \N                      | ENSGALG0000002210.833029    | 25.9648  |
| ENSGALT0000 \N                      | ENSGALG0000002210.614731    | 1.54E-25 |
| ENSGALT0000 Olfactory receptor OR18 | ENSGALG0000002210.464758    | 0.1578   |
| ENSGALT0000 \N                      | ENSGALG000000221?           | 0        |
| ENSGALT0000 \N                      | ENSGALG0000002210.562993    | 4        |
| ENSGALT0000 \N                      | ENSGALG000000221?           | 3.74E-25 |
| ENSGALT0000 \N                      | ENSGALG0000002210.958977    | 2174     |
| ENSGALT0000 \N                      | ENSGALG0000002210.881754    | 31.0308  |
| ENSGALT0000 \N                      | ENSGALG000000221?           | 0        |
| ENSGALT0000 \N                      | ENSGALG0000002210.000738758 | 0.16609  |

|                                     |                           |          |
|-------------------------------------|---------------------------|----------|
| ENSGALT0000 \N                      | ENSGALG0000002210.908347  | 244.603  |
| ENSGALT0000 \N                      | ENSGALG0000002210.980565  | 60.0841  |
| ENSGALT0000 \N                      | ENSGALG0000002210.464758  | 0        |
| ENSGALT0000 \N                      | ENSGALG000000221?         | 0        |
| ENSGALT0000 \N                      | ENSGALG0000002210.464758  | 0.2593   |
| ENSGALT0000 \N                      | ENSGALG0000002210.983926  | 551.415  |
| ENSGALT0000 \N                      | ENSGALG0000002210.878446  | 11.85    |
| ENSGALT0000 \N                      | ENSGALG0000002210.474033  | 5.51E-05 |
| ENSGALT0000 \N                      | ENSGALG0000002210.831639  | 8.19843  |
| ENSGALT0000 \N                      | ENSGALG0000002210.464758  | 0        |
| ENSGALT0000 \N                      | ENSGALG0000002210.543213  | 3        |
| ENSGALT0000 \N                      | ENSGALG0000002210.649519  | 0.5      |
| ENSGALT0000 \N                      | ENSGALG0000002210.940928  | 1433.5   |
| ENSGALT0000 \N                      | ENSGALG000000221?         | 0        |
| ENSGALT0000 \N                      | ENSGALG000000221?         | 0        |
| ENSGALT0000 \N                      | ENSGALG000000221?         | 0        |
| ENSGALT0000 \N                      | ENSGALG0000002210.809695  | 318.771  |
| ENSGALT0000 \N                      | ENSGALG0000002210.713484  | 187.649  |
| ENSGALT0000 \N                      | ENSGALG0000002210.476596  | 0.00141  |
| ENSGALT0000 \N                      | ENSGALG0000002210.828826  | 5        |
| ENSGALT0000 \N                      | ENSGALG0000002210.464758  | 0.00662  |
| ENSGALT0000 \N                      | ENSGALG0000002210.939104  | 9.08207  |
| ENSGALT0000 \N                      | ENSGALG0000002210.464758  | 0.66098  |
| ENSGALT0000 \N                      | ENSGALG0000002210.708067  | 1595.5   |
| ENSGALT0000 \N                      | ENSGALG000000221?         | 0        |
| ENSGALT0000 \N                      | ENSGALG000000221?         | 0        |
| ENSGALT0000 \N                      | ENSGALG0000002210.464758  | 0        |
| ENSGALT0000 \N                      | ENSGALG0000002210.0203561 | 0.0128   |
| ENSGALT0000 \N                      | ENSGALG0000002210.889876  | 107      |
| ENSGALT0000 \N                      | ENSGALG0000002210.750489  | 3.08183  |
| ENSGALT0000 \N                      | ENSGALG0000002210.932406  | 151.5    |
| ENSGALT0000 \N                      | ENSGALG0000002210.526508  | 0.75969  |
| ENSGALT0000 \N                      | ENSGALG0000002210.645194  | 1.59033  |
| ENSGALT0000 \N                      | ENSGALG000000221?         | 0        |
| ENSGALT0000 \N                      | ENSGALG0000002210.984909  | 35       |
| ENSGALT0000 \N                      | ENSGALG0000002210.919378  | 526.415  |
| ENSGALT0000 \N                      | ENSGALG0000002210.929586  | 4.78167  |
| ENSGALT0000 \N                      | ENSGALG000000221?         | 0        |
| ENSGALT0000 \N                      | ENSGALG0000002210.670747  | 4.08994  |
| ENSGALT0000 \N                      | ENSGALG0000002210.962956  | 3.81321  |
| ENSGALT0000 \N                      | ENSGALG0000002210.649388  | 1.96E-10 |
| ENSGALT0000 \N                      | ENSGALG000000221?         | 0        |
| ENSGALT0000 \N                      | ENSGALG0000002210.464758  | 2.42E-25 |
| ENSGALT0000 \N                      | ENSGALG000000222?         | 0        |
| ENSGALT0000 \N                      | ENSGALG000000222?         | 0        |
| ENSGALT0000 \N                      | ENSGALG000000222 0.464758 | 0.0527   |
| ENSGALT0000 \N                      | ENSGALG000000222?         | 2.19E-14 |
| ENSGALT0000 Olfactory receptor OR39 | ENSGALG000000222 0.46475  | 0        |
| ENSGALT0000 \N                      | ENSGALG000000222 0.907462 | 5.16284  |
| ENSGALT0000 \N                      | ENSGALG000000222?         | 3.36E-13 |
| ENSGALT0000 \N                      | ENSGALG000000222?         | 0        |
| ENSGALT0000 \N                      | ENSGALG000000222 0.464758 | 0        |
| ENSGALT0000 \N                      | ENSGALG000000222 0.532124 | 1.93772  |
| ENSGALT0000 \N                      | ENSGALG000000222 0.765663 | 2.11505  |
| ENSGALT0000 \N                      | ENSGALG000000222 0.464758 | 0.5      |
| ENSGALT0000 \N                      | ENSGALG000000222 0.632841 | 6.79933  |

|                                     |                           |          |
|-------------------------------------|---------------------------|----------|
| ENSGALT0000 \N                      | ENSGALG000000222 0.464759 | 4.47E-06 |
| ENSGALT0000 \N                      | ENSGALG000000222 0.589739 | 0.76962  |
| ENSGALT0000 \N                      | ENSGALG000000222 0.46476  | 0.00291  |
| ENSGALT0000 \N                      | ENSGALG000000222 0.894308 | 603.128  |
| ENSGALT0000 \N                      | ENSGALG000000222 ?        | 0        |
| ENSGALT0000 \N                      | ENSGALG000000222 ?        | 0        |
| ENSGALT0000 Olfactory receptor OR38 | ENSGALG000000222 ?        | 0        |
| ENSGALT0000 \N                      | ENSGALG000000222 ?        | 2.49E-33 |
| ENSGALT0000 \N                      | ENSGALG000000222 ?        | 2.72E-30 |
| ENSGALT0000 Olfactory receptor OR12 | ENSGALG000000222 0.464758 | 1.54568  |
| ENSGALT0000 \N                      | ENSGALG000000222 0.99938  | 122.447  |
| ENSGALT0000 \N                      | ENSGALG000000222 0.464758 | 1.38E-21 |
| ENSGALT0000 Olfactory receptor OR17 | ENSGALG000000222 ?        | 0        |
| ENSGALT0000 \N                      | ENSGALG000000222 ?        | 0        |
| ENSGALT0000 \N                      | ENSGALG000000222 ?        | 4.25E-25 |
| ENSGALT0000 \N                      | ENSGALG000000222 ?        | 0        |
| ENSGALT0000 \N                      | ENSGALG000000222 0.464758 | 0        |
| ENSGALT0000 \N                      | ENSGALG000000222 0        | 0        |
| ENSGALT0000 \N                      | ENSGALG000000222 0.775807 | 9        |
| ENSGALT0000 \N                      | ENSGALG000000222 0.441787 | 516      |
| ENSGALT0000 \N                      | ENSGALG000000222 0.464758 | 4.70E-14 |
| ENSGALT0000 \N                      | ENSGALG000000222 0.983236 | 232.085  |
| ENSGALT0000 \N                      | ENSGALG000000222 0.77018  | 8.7612   |
| ENSGALT0000 \N                      | ENSGALG000000222 0.464758 | 0.98559  |
| ENSGALT0000 \N                      | ENSGALG000000222 0.735435 | 3.43767  |
| ENSGALT0000 \N                      | ENSGALG000000222 0.891615 | 542      |
| ENSGALT0000 MHC class II antigen    | ENSGALG000000222 0.944054 | 64.9345  |
| ENSGALT0000 \N                      | ENSGALG000000222 ?        | 0        |
| ENSGALT0000 \N                      | ENSGALG000000222 0.465077 | 9.20E-09 |
| ENSGALT0000 \N                      | ENSGALG000000222 ?        | 0        |
| ENSGALT0000 \N                      | ENSGALG000000222 0.477151 | 0.4473   |
| ENSGALT0000 \N                      | ENSGALG000000222 0.434573 | 2.89595  |
| ENSGALT0000 \N                      | ENSGALG000000222 0.93426  | 13       |
| ENSGALT0000 \N                      | ENSGALG000000222 0.574437 | 3.16667  |
| ENSGALT0000 \N                      | ENSGALG000000222 0.464758 | 0.00099  |
| ENSGALT0000 \N                      | ENSGALG000000222 0.464758 | 3.13E-13 |
| ENSGALT0000 \N                      | ENSGALG000000222 0.880031 | 178.814  |
| ENSGALT0000 \N                      | ENSGALG000000222 0.821793 | 879      |
| ENSGALT0000 \N                      | ENSGALG000000222 0.564151 | 2.11E-20 |
| ENSGALT0000 \N                      | ENSGALG000000222 0.464758 | 0        |
| ENSGALT0000 \N                      | ENSGALG000000222 0.4648   | 0.0003   |
| ENSGALT0000 Olfactory receptor OR10 | ENSGALG000000222 ?        | 3.17E-16 |
| ENSGALT0000 \N                      | ENSGALG000000222 ?        | 0        |
| ENSGALT0000 \N                      | ENSGALG000000222 0.464758 | 6.57E-10 |
| ENSGALT0000 \N                      | ENSGALG000000222 0.488876 | 0.34584  |
| ENSGALT0000 \N                      | ENSGALG000000222 0.846187 | 3.30993  |
| ENSGALT0000 \N                      | ENSGALG000000222 0.996026 | 46       |
| ENSGALT0000 \N                      | ENSGALG000000222 ?        | 0        |
| ENSGALT0000 \N                      | ENSGALG000000222 0.532041 | 7.95E-31 |
| ENSGALT0000 \N                      | ENSGALG000000222 0.464758 | 1.23113  |
| ENSGALT0000 \N                      | ENSGALG000000222 0.931482 | 15.8792  |
| ENSGALT0000 \N                      | ENSGALG000000222 0.578226 | 0.00017  |
| ENSGALT0000 \N                      | ENSGALG000000222 0.464758 | 2.50E-09 |
| ENSGALT0000 \N                      | ENSGALG000000222 0.97519  | 573.5    |
| ENSGALT0000 \N                      | ENSGALG000000222 0.858885 | 39.3349  |
| ENSGALT0000 \N                      | ENSGALG000000222 0.99063  | 144      |



|                                     |                            |          |
|-------------------------------------|----------------------------|----------|
| ENSGALT0000 \N                      | ENSGALG000000222 0.99743   | 37       |
| ENSGALT0000 \N                      | ENSGALG000000222 0.476596  | 0.00141  |
| ENSGALT0000 \N                      | ENSGALG000000222 0.399141  | 0        |
| ENSGALT0000 \N                      | ENSGALG000000222 0.0470083 | 2        |
| ENSGALT0000 \N                      | ENSGALG000000222 ?         | 2.10E-35 |
| ENSGALT0000 \N                      | ENSGALG000000222 ?         | 0        |
| ENSGALT0000 Olfactory receptor OR40 | ENSGALG000000222 0.0539949 | 1.5      |
| ENSGALT0000 \N                      | ENSGALG000000222 0.954453  | 0.75644  |
| ENSGALT0000 \N                      | ENSGALG000000222 0.464758  | 0        |
| ENSGALT0000 \N                      | ENSGALG000000222 0.464758  | 6.60E-38 |
| ENSGALT0000 Olfactory receptor OR13 | ENSGALG000000222 ?         | 0        |
| ENSGALT0000 \N                      | ENSGALG000000222 ?         | 2.51E-27 |
| ENSGALT0000 \N                      | ENSGALG000000222 0.464758  | 1.49E-06 |
| ENSGALT0000 \N                      | ENSGALG000000222 0.516641  | 110.005  |
| ENSGALT0000 \N                      | ENSGALG000000222 0.992161  | 462.5    |
| ENSGALT0000 \N                      | ENSGALG000000222 0.675373  | 6.86944  |
| ENSGALT0000 \N                      | ENSGALG000000222 0.850534  | 126.822  |
| ENSGALT0000 \N                      | ENSGALG000000222 0.674574  | 0.51814  |
| ENSGALT0000 \N                      | ENSGALG000000222 0.987231  | 16.3025  |
| ENSGALT0000 \N                      | ENSGALG000000222 ?         | 0        |
| ENSGALT0000 \N                      | ENSGALG000000222 ?         | 0        |
| ENSGALT0000 \N                      | ENSGALG000000222 ?         | 0        |
| ENSGALT0000 \N                      | ENSGALG000000222 0.464758  | 0.00138  |
| ENSGALT0000 \N                      | ENSGALG000000222 ?         | 2.32E-22 |
| ENSGALT0000 \N                      | ENSGALG000000222 0.464758  | 0        |
| ENSGALT0000 \N                      | ENSGALG000000222 0.986114  | 1458.97  |
| ENSGALT0000 \N                      | ENSGALG000000222 0.713235  | 9.44694  |
| ENSGALT0000 \N                      | ENSGALG000000222 0.308782  | 7.3055   |
| ENSGALT0000 \N                      | ENSGALG000000222 0.464758  | 0        |
| ENSGALT0000 \N                      | ENSGALG000000222 0.464758  | 0        |
| ENSGALT0000 \N                      | ENSGALG000000222 0.464758  | 0        |
| ENSGALT0000 \N                      | ENSGALG000000222 0.464758  | 0.00038  |
| ENSGALT0000 \N                      | ENSGALG000000222 ?         | 0        |
| ENSGALT0000 \N                      | ENSGALG000000222 0.464758  | 0        |
| ENSGALT0000 \N                      | ENSGALG000000222 0.357562  | 1.19317  |
| ENSGALT0000 \N                      | ENSGALG000000222 0.974027  | 308      |
| ENSGALT0000 \N                      | ENSGALG000000222 0.982406  | 177.5    |
| ENSGALT0000 \N                      | ENSGALG000000222 0.975175  | 89.5     |
| ENSGALT0000 \N                      | ENSGALG000000222 0.957896  | 52.5976  |
| ENSGALT0000 \N                      | ENSGALG000000222 0.464758  | 0.52201  |
| ENSGALT0000 \N                      | ENSGALG000000222 0.0903914 | 2.11668  |
| ENSGALT0000 \N                      | ENSGALG000000222 0.603682  | 1        |
| ENSGALT0000 \N                      | ENSGALG000000222 0.98741   | 44       |
| ENSGALT0000 \N                      | ENSGALG000000222 0.875856  | 146.376  |
| ENSGALT0000 \N                      | ENSGALG000000222 0.859047  | 23.4311  |
| ENSGALT0000 \N                      | ENSGALG000000222 0.802774  | 1188.47  |
| ENSGALT0000 \N                      | ENSGALG000000222 0.685235  | 9.6243   |
| ENSGALT0000 Olfactory receptor OR8  | ENSGALG000000222 0.464758  | 1.03E-08 |
| ENSGALT0000 \N                      | ENSGALG000000222 0.464758  | 1.59E-09 |
| ENSGALT0000 \N                      | ENSGALG000000222 0.937889  | 363.5    |
| ENSGALT0000 \N                      | ENSGALG000000222 ?         | 0        |
| ENSGALT0000 \N                      | ENSGALG000000222 0.963665  | 6        |
| ENSGALT0000 \N                      | ENSGALG000000222 0.603682  | 0        |
| ENSGALT0000 \N                      | ENSGALG000000222 0.935153  | 124.52   |
| ENSGALT0000 \N                      | ENSGALG000000222 0.870738  | 671.981  |
| ENSGALT0000 \N                      | ENSGALG000000222 0.626214  | 25.8417  |

|                                     |                            |          |
|-------------------------------------|----------------------------|----------|
| ENSGALT0000 Olfactory receptor OR28 | ENSGALG000000223 ?         | 0        |
| ENSGALT0000 \N                      | ENSGALG000000223 0.473788  | 0.21178  |
| ENSGALT0000 \N                      | ENSGALG000000223 ?         | 0        |
| ENSGALT0000 \N                      | ENSGALG000000223 0.464758  | 1.08E-31 |
| ENSGALT0000 \N                      | ENSGALG000000223 ?         | 0        |
| ENSGALT0000 \N                      | ENSGALG000000223 0.464758  | 0.81061  |
| ENSGALT0000 \N                      | ENSGALG000000223 ?         | 0        |
| ENSGALT0000 \N                      | ENSGALG000000223 0.464758  | 0.07706  |
| ENSGALT0000 \N                      | ENSGALG000000223 ?         | 0        |
| ENSGALT0000 \N                      | ENSGALG000000223 ?         | 0        |
| ENSGALT0000 \N                      | ENSGALG000000223 ?         | 3.47E-35 |
| ENSGALT0000 \N                      | ENSGALG000000223 0.963041  | 453.298  |
| ENSGALT0000 \N                      | ENSGALG000000223 0.927923  | 32.0885  |
| ENSGALT0000 \N                      | ENSGALG000000223 0.603682  | 1        |
| ENSGALT0000 \N                      | ENSGALG000000223 0.821068  | 455.5    |
| ENSGALT0000 \N                      | ENSGALG000000223 0.0293934 | 1.17647  |
| ENSGALT0000 \N                      | ENSGALG000000223 0.464758  | 0        |
| ENSGALT0000 \N                      | ENSGALG000000223 ?         | 0        |
| ENSGALT0000 Uncharacterized protein | ENSGALG000000223 0.603682  | 0.25     |
| ENSGALT0000 Olfactory receptor OR1  | ENSGALG000000223 0.464758  | 0        |
| ENSGALT0000 Uncharacterized protein | ENSGALG000000223 0.570637  | 0.3125   |
| ENSGALT0000 \N                      | ENSGALG000000223 0.88595   | 14.5     |
| ENSGALT0000 \N                      | ENSGALG000000223 0.916586  | 288      |
| ENSGALT0000 \N                      | ENSGALG000000223 0.79577   | 185.327  |
| ENSGALT0000 \N                      | ENSGALG000000223 ?         | 0        |
| ENSGALT0000 \N                      | ENSGALG000000223 0.464758  | 6.36E-33 |
| ENSGALT0000 \N                      | ENSGALG000000223 0.611627  | 12.5     |
| ENSGALT0000 \N                      | ENSGALG000000223 0.649515  | 1.66886  |
| ENSGALT0000 \N                      | ENSGALG000000223 0.959882  | 53.6272  |
| ENSGALT0000 \N                      | ENSGALG000000223 0.950427  | 73.9869  |
| ENSGALT0000 \N                      | ENSGALG000000223 0.978071  | 32.7178  |
| ENSGALT0000 \N                      | ENSGALG000000223 0.457466  | 10595.5  |
| ENSGALT0000 \N                      | ENSGALG000000223 0.464758  | 3.83E-07 |
| ENSGALT0000 \N                      | ENSGALG000000223 0.916515  | 182.5    |
| ENSGALT0000 \N                      | ENSGALG000000223 ?         | 0        |
| ENSGALT0000 \N                      | ENSGALG000000223 ?         | 0        |
| ENSGALT0000 \N                      | ENSGALG000000223 0.889363  | 5.47595  |
| ENSGALT0000 \N                      | ENSGALG000000223 0.668866  | 0.60933  |
| ENSGALT0000 \N                      | ENSGALG000000223 ?         | 1.82E-13 |
| ENSGALT0000 \N                      | ENSGALG000000223 0.791162  | 1.03801  |
| ENSGALT0000 \N                      | ENSGALG000000223 0.464758  | 0        |
| ENSGALT0000 \N                      | ENSGALG000000223 ?         | 1.70E-38 |
| ENSGALT0000 Olfactory receptor OR27 | ENSGALG000000223 0.464758  | 1        |
| ENSGALT0000 \N                      | ENSGALG000000223 ?         | 8.04E-15 |
| ENSGALT0000 \N                      | ENSGALG000000223 0.48003   | 2.28E-12 |
| ENSGALT0000 \N                      | ENSGALG000000223 ?         | 0        |
| ENSGALT0000 \N                      | ENSGALG000000223 0.464758  | 2.33E-31 |
| ENSGALT0000 Olfactory receptor OR4  | ENSGALG000000223 ?         | 0        |
| ENSGALT0000 \N                      | ENSGALG000000223 ?         | 6.46E-37 |
| ENSGALT0000 \N                      | ENSGALG000000223 0.464758  | 0.84358  |
| ENSGALT0000 \N                      | ENSGALG000000223 0.464758  | 0        |
| ENSGALT0000 \N                      | ENSGALG000000223 ?         | 0        |
| ENSGALT0000 Olfactory receptor OR17 | ENSGALG000000223 0.464758  | 0        |
| ENSGALT0000 \N                      | ENSGALG000000223 ?         | 0        |
| ENSGALT0000 \N                      | ENSGALG000000224 0.464758  | 1.95E-12 |
| ENSGALT0000 \N                      | ENSGALG000000224 0.806311  | 97.6941  |

|                                     |                          |          |
|-------------------------------------|--------------------------|----------|
| ENSGALT0000 Wpkci                   | ENSGALG0000002240.611996 | 24.5766  |
| ENSGALT0000 \N                      | ENSGALG0000002240.747952 | 54.5637  |
| ENSGALT0000 \N                      | ENSGALG0000002240.9978   | 234.083  |
| ENSGALT0000 \N                      | ENSGALG0000002240.91851  | 206.055  |
| ENSGALT0000 \N                      | ENSGALG000000224?        | 7.52E-40 |
| ENSGALT0000 \N                      | ENSGALG0000002240.464758 | 0        |
| ENSGALT0000 \N                      | ENSGALG000000224?        | 1.46E-31 |
| ENSGALT0000 \N                      | ENSGALG000000224?        | 0        |
| ENSGALT0000 \N                      | ENSGALG0000002240.464758 | 1.32E-25 |
| ENSGALT0000 \N                      | ENSGALG000000224?        | 0        |
| ENSGALT0000 \N                      | ENSGALG0000002240.929365 | 1.10833  |
| ENSGALT0000 \N                      | ENSGALG000000224?        | 1.11E-15 |
| ENSGALT0000 \N                      | ENSGALG0000002240.464758 | 0        |
| ENSGALT0000 \N                      | ENSGALG0000002240.736407 | 1.81573  |
| ENSGALT0000 \N                      | ENSGALG000000224?        | 0        |
| ENSGALT0000 \N                      | ENSGALG0000002240.464758 | 0        |
| ENSGALT0000 \N                      | ENSGALG0000002240.464758 | 0        |
| ENSGALT0000 \N                      | ENSGALG000000224?        | 0        |
| ENSGALT0000 \N                      | ENSGALG000000224?        | 0        |
| ENSGALT0000 \N                      | ENSGALG000000224?        | 0        |
| ENSGALT0000 \N                      | ENSGALG000000224?        | 0        |
| ENSGALT0000 \N                      | ENSGALG0000002240.972288 | 2.4926   |
| ENSGALT0000 \N                      | ENSGALG0000002240.956734 | 54.463   |
| ENSGALT0000 \N                      | ENSGALG0000002240.618308 | 1.5      |
| ENSGALT0000 \N                      | ENSGALG0000002240.768468 | 2.31817  |
| ENSGALT0000 \N                      | ENSGALG0000002240.464758 | 3.40E-09 |
| ENSGALT0000 \N                      | ENSGALG0000002240.649519 | 3.40E-09 |
| ENSGALT0000 \N                      | ENSGALG0000002240.464758 | 1.00E-08 |
| ENSGALT0000 \N                      | ENSGALG0000002240.98208  | 665.259  |
| ENSGALT0000 \N                      | ENSGALG000000224?        | 0        |
| ENSGALT0000 \N                      | ENSGALG0000002240.190889 | 0        |
| ENSGALT0000 Uncharacterized protein | ENSGALG0000002240.930671 | 347.617  |
| ENSGALT0000 \N                      | ENSGALG0000002240.464758 | 0        |
| ENSGALT0000 \N                      | ENSGALG0000002240.283623 | 20931.5  |
| ENSGALT0000 \N                      | ENSGALG0000002240.285666 | 3.06E-07 |
| ENSGALT0000 \N                      | ENSGALG0000002240.645034 | 1.43641  |
| ENSGALT0000 \N                      | ENSGALG0000002240.916989 | 12       |
| ENSGALT0000 \N                      | ENSGALG000000224?        | 0        |
| ENSGALT0000 \N                      | ENSGALG0000002240.987013 | 570.5    |
| ENSGALT0000 \N                      | ENSGALG0000002240.470272 | 2.67E-11 |
| ENSGALT0000 \N                      | ENSGALG0000002240.704835 | 5        |
| ENSGALT0000 \N                      | ENSGALG000000224?        | 0        |
| ENSGALT0000 \N                      | ENSGALG0000002240.857455 | 18.5     |
| ENSGALT0000 \N                      | ENSGALG0000002240.464758 | 7.58E-13 |
| ENSGALT0000 \N                      | ENSGALG0000002240.948619 | 180.782  |
| ENSGALT0000 \N                      | ENSGALG0000002240.378278 | 0.49962  |
| ENSGALT0000 \N                      | ENSGALG0000002240.943035 | 3.20376  |
| ENSGALT0000 \N                      | ENSGALG0000002240.985133 | 5.00223  |
| ENSGALT0000 \N                      | ENSGALG0000002240.918836 | 13       |
| ENSGALT0000 \N                      | ENSGALG0000002240.464758 | 1.30E-09 |
| ENSGALT0000 \N                      | ENSGALG0000002240.238663 | 1.69806  |
| ENSGALT0000 \N                      | ENSGALG0000002240.988937 | 143.5    |
| ENSGALT0000 \N                      | ENSGALG0000002240.998899 | 165.181  |
| ENSGALT0000 \N                      | ENSGALG0000002240.263517 | 10.0704  |
| ENSGALT0000 \N                      | ENSGALG0000002240.464758 | 0        |
| ENSGALT0000 Olfactory receptor OR22 | ENSGALG0000002240.464759 | 0.69982  |

|                                     |                            |          |
|-------------------------------------|----------------------------|----------|
| ENSGALT0000 \N                      | ENSGALG000000224 ?         | 0        |
| ENSGALT0000 \N                      | ENSGALG000000224 0.464758  | 0        |
| ENSGALT0000 \N                      | ENSGALG000000224 0.464758  | 0        |
| ENSGALT0000 \N                      | ENSGALG000000224 0.464758  | 3.74E-31 |
| ENSGALT0000 Olfactory receptor OR24 | ENSGALG000000224 0.357389  | 0.0621   |
| ENSGALT0000 \N                      | ENSGALG000000224 ?         | 7.28E-26 |
| ENSGALT0000 \N                      | ENSGALG000000224 0.464758  | 3.67E-22 |
| ENSGALT0000 \N                      | ENSGALG000000224 ?         | 0        |
| ENSGALT0000 \N                      | ENSGALG000000224 ?         | 0        |
| ENSGALT0000 \N                      | ENSGALG000000224 ?         | 0        |
| ENSGALT0000 \N                      | ENSGALG000000224 0.464758  | 0.3422   |
| ENSGALT0000 \N                      | ENSGALG000000224 0.895314  | 1.17011  |
| ENSGALT0000 \N                      | ENSGALG000000224 ?         | 0        |
| ENSGALT0000 \N                      | ENSGALG000000224 0.464758  | 0.5      |
| ENSGALT0000 \N                      | ENSGALG000000224 0.464758  | 0        |
| ENSGALT0000 Olfactory receptor OR3  | ENSGALG000000224 ?         | 2.31E-15 |
| ENSGALT0000 \N                      | ENSGALG000000224 ?         | 0        |
| ENSGALT0000 \N                      | ENSGALG000000224 0.470806  | 1.68E-40 |
| ENSGALT0000 \N                      | ENSGALG000000224 ?         | 0        |
| ENSGALT0000 \N                      | ENSGALG000000224 ?         | 0        |
| ENSGALT0000 \N                      | ENSGALG000000224 0.849215  | 9.85693  |
| ENSGALT0000 \N                      | ENSGALG000000224 0.945806  | 16.5     |
| ENSGALT0000 \N                      | ENSGALG000000224 0.874103  | 131.373  |
| ENSGALT0000 \N                      | ENSGALG000000224 0.998264  | 11.6849  |
| ENSGALT0000 \N                      | ENSGALG000000224 0.958249  | 185.593  |
| ENSGALT0000 \N                      | ENSGALG000000224 0.999534  | 393.473  |
| ENSGALT0000 \N                      | ENSGALG000000224 ?         | 0        |
| ENSGALT0000 \N                      | ENSGALG000000224 0.675544  | 43.8181  |
| ENSGALT0000 \N                      | ENSGALG000000224 0.649519  | 0.5      |
| ENSGALT0000 \N                      | ENSGALG000000224 0.842917  | 394      |
| ENSGALT0000 \N                      | ENSGALG000000224 0.46733   | 0        |
| ENSGALT0000 \N                      | ENSGALG000000224 0.537365  | 1.99554  |
| ENSGALT0000 \N                      | ENSGALG000000224 ?         | 0        |
| ENSGALT0000 \N                      | ENSGALG000000224 ?         | 0        |
| ENSGALT0000 \N                      | ENSGALG000000224 0.887112  | 681      |
| ENSGALT0000 \N                      | ENSGALG000000224 0.464758  | 0        |
| ENSGALT0000 \N                      | ENSGALG000000224 ?         | 0        |
| ENSGALT0000 \N                      | ENSGALG000000225 ?         | 0        |
| ENSGALT0000 \N                      | ENSGALG000000225 0.464758  | 0.5      |
| ENSGALT0000 \N                      | ENSGALG000000225 0.999988  | 666.986  |
| ENSGALT0000 \N                      | ENSGALG000000225 0.504952  | 7        |
| ENSGALT0000 \N                      | ENSGALG000000225 0.960409  | 141.5    |
| ENSGALT0000 \N                      | ENSGALG000000225 0.464758  | 4.65E-15 |
| ENSGALT0000 Uncharacterized protein | ENSGALG000000225 ?         | 4.02E-16 |
| ENSGALT0000 Uncharacterized protein | ENSGALG000000225 0.464869  | 1.49826  |
| ENSGALT0000 \N                      | ENSGALG000000225 0.828826  | 0.5      |
| ENSGALT0000 \N                      | ENSGALG000000225 0.358257  | 3.5      |
| ENSGALT0000 \N                      | ENSGALG000000225 0.649519  | 0.5      |
| ENSGALT0000 \N                      | ENSGALG000000225 ?         | 0        |
| ENSGALT0000 \N                      | ENSGALG000000225 0.516202  | 8.73E-30 |
| ENSGALT0000 \N                      | ENSGALG000000225 0.762013  | 2.30728  |
| ENSGALT0000 Uncharacterized protein | ENSGALG000000225 0.465785  | 0.3125   |
| ENSGALT0000 \N                      | ENSGALG000000225 0.950451  | 15.8074  |
| ENSGALT0000 \N                      | ENSGALG000000225 0.0694891 | 5.19345  |
| ENSGALT0000 \N                      | ENSGALG000000225 0.929628  | 5.95053  |
| ENSGALT0000 \N                      | ENSGALG000000225 0.944229  | 73       |

|                                      |                           |          |
|--------------------------------------|---------------------------|----------|
| ENSGALT0000 \N                       | ENSGALG000000225 0.381797 | 204.984  |
| ENSGALT0000 \N                       | ENSGALG000000225 0.196914 | 2.52708  |
| ENSGALT0000 \N                       | ENSGALG000000225 0.464758 | 0.10546  |
| ENSGALT0000 \N                       | ENSGALG000000225 0.833825 | 0.9761   |
| ENSGALT0000 \N                       | ENSGALG000000225 0.109338 | 0        |
| ENSGALT0000 \N                       | ENSGALG000000225 0.468515 | 2.45E-07 |
| ENSGALT0000 \N                       | ENSGALG000000225 0.643336 | 0.79558  |
| ENSGALT0000 \N                       | ENSGALG000000225 0.464758 | 0        |
| ENSGALT0000 \N                       | ENSGALG000000225 0.527078 | 5.10115  |
| ENSGALT0000 \N                       | ENSGALG000000225 0.873779 | 324      |
| ENSGALT0000 \N                       | ENSGALG000000225 0.706204 | 68.3231  |
| ENSGALT0000 \N                       | ENSGALG000000225 0.960152 | 132.393  |
| ENSGALT0000 \N                       | ENSGALG000000225 0.993218 | 119.5    |
| ENSGALT0000 \N                       | ENSGALG000000225 0.990725 | 323.448  |
| ENSGALT0000 \N                       | ENSGALG000000225 ?        | 0        |
| ENSGALT0000 \N                       | ENSGALG000000225 ?        | 0        |
| ENSGALT0000 \N                       | ENSGALG000000225 0.464758 | 1.63E-21 |
| ENSGALT0000 \N                       | ENSGALG000000225 0.490714 | 0.20073  |
| ENSGALT0000 \N                       | ENSGALG000000225 0.468211 | 0        |
| ENSGALT0000 \N                       | ENSGALG000000225 0.993287 | 97.4646  |
| ENSGALT0000 \N                       | ENSGALG000000225 0.999792 | 5.348    |
| ENSGALT0000 \N                       | ENSGALG000000225 0.958869 | 308.502  |
| ENSGALT0000 \N                       | ENSGALG000000225 0.138495 | 2.58168  |
| ENSGALT0000 \N                       | ENSGALG000000225 0.47906  | 2.94E-32 |
| ENSGALT0000 \N                       | ENSGALG000000225 0.788621 | 1.75365  |
| ENSGALT0000 \N                       | ENSGALG000000225 0.464759 | 1.10E-07 |
| ENSGALT0000 \N                       | ENSGALG000000225 0.956068 | 1119     |
| ENSGALT0000 \N                       | ENSGALG000000225 0.948092 | 102.239  |
| ENSGALT0000 \N                       | ENSGALG000000225 0.963928 | 53.243   |
| ENSGALT0000 \N                       | ENSGALG000000225 ?        | 0        |
| ENSGALT0000 \N                       | ENSGALG000000225 0.834571 | 1072     |
| ENSGALT0000 \N                       | ENSGALG000000225 0.857191 | 423      |
| ENSGALT0000 \N                       | ENSGALG000000225 0.464758 | 2.44E-33 |
| ENSGALT0000 \N                       | ENSGALG000000225 ?        | 0        |
| ENSGALT0000 \N                       | ENSGALG000000225 0.469097 | 1.92E-09 |
| ENSGALT0000 \N                       | ENSGALG000000225 ?        | 0        |
| ENSGALT0000 \N                       | ENSGALG000000225 ?        | 0        |
| ENSGALT0000 Zona pellucida protein 1 | ENSGALG000000225 0.637409 | 5.5      |
| ENSGALT0000 \N                       | ENSGALG000000225 0.293541 | 1313.5   |
| ENSGALT0000 \N                       | ENSGALG000000225 0.942837 | 57.705   |
| ENSGALT0000 \N                       | ENSGALG000000225 ?        | 0        |
| ENSGALT0000 \N                       | ENSGALG000000225 0.655247 | 0.65737  |
| ENSGALT0000 \N                       | ENSGALG000000225 0.777798 | 4031     |
| ENSGALT0000 \N                       | ENSGALG000000225 0.80696  | 12.5     |
| ENSGALT0000 \N                       | ENSGALG000000225 0.350508 | 1.31913  |
| ENSGALT0000 \N                       | ENSGALG000000225 0.321704 | 0        |
| ENSGALT0000 \N                       | ENSGALG000000225 0.464758 | 0        |
| ENSGALT0000 Olfactory receptor OR14  | ENSGALG000000225 0.464758 | 2.00E-31 |
| ENSGALT0000 \N                       | ENSGALG000000225 0.793507 | 168.684  |
| ENSGALT0000 \N                       | ENSGALG000000225 0.92377  | 174.797  |
| ENSGALT0000 \N                       | ENSGALG000000225 ?        | 0        |
| ENSGALT0000 \N                       | ENSGALG000000225 ?        | 0        |
| ENSGALT0000 \N                       | ENSGALG000000225 0.564149 | 6.70E-32 |
| ENSGALT0000 Olfactory receptor OR26  | ENSGALG000000225 0.464758 | 0        |
| ENSGALT0000 \N                       | ENSGALG000000225 0.464758 | 0        |
| ENSGALT0000 \N                       | ENSGALG000000225 ?        | 0        |

|                                     |                           |          |
|-------------------------------------|---------------------------|----------|
| ENSGALT0000 Uncharacterized protein | ENSGALG000000225 0.464734 | 0        |
| ENSGALT0000 \N                      | ENSGALG000000225 0.952733 | 131.364  |
| ENSGALT0000 \N                      | ENSGALG000000225 0.826774 | 1.13574  |
| ENSGALT0000 \N                      | ENSGALG000000225 0.464758 | 1.43E-12 |
| ENSGALT0000 \N                      | ENSGALG000000225 0.96237  | 183.5    |
| ENSGALT0000 \N                      | ENSGALG000000225 0.727328 | 1.30398  |
| ENSGALT0000 \N                      | ENSGALG000000225 ?        | 0        |
| ENSGALT0000 \N                      | ENSGALG000000225 0.464757 | 4.18E-17 |
| ENSGALT0000 \N                      | ENSGALG000000225 0.488989 | 1.63E-06 |
| ENSGALT0000 \N                      | ENSGALG000000225 0.780657 | 1.5      |
| ENSGALT0000 \N                      | ENSGALG000000225 0.328124 | 4        |
| ENSGALT0000 \N                      | ENSGALG000000225 0.936827 | 4.17158  |
| ENSGALT0000 \N                      | ENSGALG000000226 0.953497 | 255.5    |
| ENSGALT0000 \N                      | ENSGALG000000226 0.947785 | 90.7534  |
| ENSGALT0000 \N                      | ENSGALG000000226 0.464758 | 9.35E-11 |
| ENSGALT0000 \N                      | ENSGALG000000226 ?        | 1.09E-14 |
| ENSGALT0000 \N                      | ENSGALG000000226 0.464758 | 3.10E-06 |
| ENSGALT0000 \N                      | ENSGALG000000226 0.464758 | 0        |
| ENSGALT0000 \N                      | ENSGALG000000226 ?        | 5.82E-19 |
| ENSGALT0000 \N                      | ENSGALG000000226 0.649519 | 3.40E-09 |
| ENSGALT0000 \N                      | ENSGALG000000226 0.961763 | 79.9626  |
| ENSGALT0000 \N                      | ENSGALG000000226 0.634512 | 0.71352  |
| ENSGALT0000 \N                      | ENSGALG000000226 0.63667  | 0        |
| ENSGALT0000 \N                      | ENSGALG000000226 0.989607 | 6400     |
| ENSGALT0000 \N                      | ENSGALG000000226 0.982509 | 3.64981  |
| ENSGALT0000 \N                      | ENSGALG000000226 0.498615 | 0.00708  |
| ENSGALT0000 Uncharacterized protein | ENSGALG000000226 0.877869 | 841.927  |
| ENSGALT0000 Olfactory receptor OR31 | ENSGALG000000226 0.465077 | 1.88E-09 |
| ENSGALT0000 \N                      | ENSGALG000000226 ?        | 0        |
| ENSGALT0000 \N                      | ENSGALG000000226 0.844847 | 570      |
| ENSGALT0000 \N                      | ENSGALG000000226 0.957673 | 203.204  |
| ENSGALT0000 \N                      | ENSGALG000000226 0.317257 | 15.5725  |
| ENSGALT0000 \N                      | ENSGALG000000226 ?        | 0        |
| ENSGALT0000 \N                      | ENSGALG000000226 0.464758 | 0        |
| ENSGALT0000 \N                      | ENSGALG000000226 0.598053 | 0.01388  |
| ENSGALT0000 \N                      | ENSGALG000000226 0.686611 | 0.83335  |
| ENSGALT0000 Uncharacterized protein | ENSGALG000000226 0.926253 | 11.5     |
| ENSGALT0000 Uncharacterized protein | ENSGALG000000226 ?        | 0        |
| ENSGALT0000 Uncharacterized protein | ENSGALG000000226 0.560742 | 0.5      |
| ENSGALT0000 Uncharacterized protein | ENSGALG000000226 0.938699 | 102      |
| ENSGALT0000 Uncharacterized protein | ENSGALG000000226 0.680622 | 1        |
| ENSGALT0000 Uncharacterized protein | ENSGALG000000226 0.70316  | 1.5      |
| ENSGALT0000 Uncharacterized protein | ENSGALG000000226 0.907598 | 474.5    |
| ENSGALT0000 Uncharacterized protein | ENSGALG000000226 0.79689  | 1089     |
| ENSGALT0000 Uncharacterized protein | ENSGALG000000226 0.487185 | 75.743   |
| ENSGALT0000 Uncharacterized protein | ENSGALG000000226 0.991923 | 49.5     |
| ENSGALT0000 Uncharacterized protein | ENSGALG000000226 ?        | 0        |
| ENSGALT0000 \N                      | ENSGALG000000226 0.752829 | 26       |
| ENSGALT0000 Uncharacterized protein | ENSGALG000000226 0.848628 | 148.5    |
| ENSGALT0000 Uncharacterized protein | ENSGALG000000226 0.896382 | 612.5    |
| ENSGALT0000 Uncharacterized protein | ENSGALG000000226 0.978182 | 2        |
| ENSGALT0000 Uncharacterized protein | ENSGALG000000226 0.908975 | 188.008  |
| ENSGALT0000 Uncharacterized protein | ENSGALG000000226 0.215945 | 52.8805  |
| ENSGALT0000 Uncharacterized protein | ENSGALG000000226 0.916581 | 34.5     |
| ENSGALT0000 Uncharacterized protein | ENSGALG000000226 0.943426 | 420      |
| ENSGALT0000 Uncharacterized protein | ENSGALG000000226 0.886335 | 717      |

|                                              |                            |          |
|----------------------------------------------|----------------------------|----------|
| ENSGALT0000 Uncharacterized protein          | ENSGALG000000226 0.0753379 | 0.5      |
| ENSGALT0000 Uncharacterized protein          | ENSGALG000000226 ?         | 0        |
| ENSGALT0000 Uncharacterized protein          | ENSGALG000000226 0.595461  | 0.87009  |
| ENSGALT0000 Uncharacterized protein          | ENSGALG000000226 0.585662  | 0.5      |
| ENSGALT0000 Uncharacterized protein          | ENSGALG000000226 0.994127  | 107      |
| ENSGALT0000 Wpkci                            | ENSGALG000000226 0.611996  | 24.5766  |
| ENSGALT0000 Wpkci                            | ENSGALG000000226 0.611996  | 24.5766  |
| ENSGALT0000 Wpkci                            | ENSGALG000000226 0.611996  | 24.5766  |
| ENSGALT0000 Female-associated factor FAF     | ENSGALG000000226 0.51816   | 63.8964  |
| ENSGALT0000 Wpkci                            | ENSGALG000000226 0.611996  | 24.5766  |
| ENSGALT0000 Wpkci                            | ENSGALG000000226 0.611996  | 24.5766  |
| ENSGALT0000 Wpkci                            | ENSGALG000000226 0.257436  | 0.01346  |
| ENSGALT0000 Wpkci                            | ENSGALG000000226 0.611996  | 24.5766  |
| ENSGALT0000 Wpkci                            | ENSGALG000000226 0.611996  | 24.5766  |
| ENSGALT0000 Wpkci                            | ENSGALG000000226 0.611996  | 24.5766  |
| ENSGALT0000 HINTW                            | ENSGALG000000226 0.714353  | 6780.71  |
| ENSGALT0000 Wpkci                            | ENSGALG000000226 0.611996  | 24.5766  |
| ENSGALT0000 \N                               | ENSGALG000000226 0.961818  | 12.3392  |
| ENSGALT0000 \N                               | ENSGALG000000226 0.952782  | 12.6339  |
| ENSGALT0000 \N                               | ENSGALG000000226 0.97315   | 55.7922  |
| ENSGALT0000 \N                               | ENSGALG000000226 0.916362  | 20.991   |
| ENSGALT0000 Putative uncharacterized protein | ENSGALG000000226 0.709     | 9.92937  |
| ENSGALT0000 \N                               | ENSGALG000000226 0.464758  | 5.75E-24 |
| ENSGALT0000 \N                               | ENSGALG000000226 0.950283  | 468.15   |
| ENSGALT0000 \N                               | ENSGALG000000226 0.854594  | 30.3965  |
| ENSGALT0000 Wpkci                            | ENSGALG000000226 0.611996  | 24.5766  |
| ENSGALT0000 Wpkci                            | ENSGALG000000226 0.611996  | 24.5766  |
| ENSGALT0000 Wpkci                            | ENSGALG000000226 0.611996  | 24.5766  |
| ENSGALT0000 Female-associated factor FAF     | ENSGALG000000226 ?         | 1.93E-39 |
| ENSGALT0000 \N                               | ENSGALG000000226 0.919676  | 2680.2   |
| ENSGALT0000 Female-associated factor FAF     | ENSGALG000000226 0.573429  | 1.36838  |
| ENSGALT0000 Uncharacterized protein          | ENSGALG000000226 0.765794  | 18       |
| ENSGALT0000 Uncharacterized protein          | ENSGALG000000226 0.797901  | 222.5    |
| ENSGALT0000 Uncharacterized protein          | ENSGALG000000226 0.776103  | 204.5    |
| ENSGALT0000 Uncharacterized protein          | ENSGALG000000226 0.109531  | 52.9423  |
| ENSGALT0000 Uncharacterized protein          | ENSGALG000000226 0.464758  | 5.96E-14 |
| ENSGALT0000 Uncharacterized protein          | ENSGALG000000226 0.751372  | 41.1579  |
| ENSGALT0000 Uncharacterized protein          | ENSGALG000000227 0.956361  | 46.397   |
| ENSGALT0000 Uncharacterized protein          | ENSGALG000000227 ?         | 0        |
| ENSGALT0000 Uncharacterized protein          | ENSGALG000000227 0.851539  | 138.5    |
| ENSGALT0000 Uncharacterized protein          | ENSGALG000000227 ?         | 0        |
| ENSGALT0000 Uncharacterized protein          | ENSGALG000000227 0.464758  | 0        |
| ENSGALT0000 Uncharacterized protein          | ENSGALG000000227 0.464758  | 0        |
| ENSGALT0000 Uncharacterized protein          | ENSGALG000000227 ?         | 0        |
| ENSGALT0000 Uncharacterized protein          | ENSGALG000000227 0.987219  | 89       |
| ENSGALT0000 Uncharacterized protein          | ENSGALG000000227 0.961181  | 370.5    |
| ENSGALT0000 Uncharacterized protein          | ENSGALG000000227 0.994985  | 98       |
| ENSGALT0000 Uncharacterized protein          | ENSGALG000000227 0.839976  | 13       |
| ENSGALT0000 Uncharacterized protein          | ENSGALG000000227 0.618997  | 1        |
| ENSGALT0000 Uncharacterized protein          | ENSGALG000000227 0.998721  | 6.18379  |
| ENSGALT0000 Uncharacterized protein          | ENSGALG000000227 0.993526  | 602      |
| ENSGALT0000 Uncharacterized protein          | ENSGALG000000227 0.987274  | 59       |
| ENSGALT0000 Uncharacterized protein          | ENSGALG000000227 0.464758  | 0        |
| ENSGALT0000 Uncharacterized protein          | ENSGALG000000227 0.514337  | 1.39704  |
| ENSGALT0000 Uncharacterized protein          | ENSGALG000000227 0.754829  | 8.5      |
| ENSGALT0000 Uncharacterized protein          | ENSGALG000000227 0.829514  | 16.7972  |

|                                     |                            |          |
|-------------------------------------|----------------------------|----------|
| ENSGALT0000 Uncharacterized protein | ENSGALG000000227 ?         | 0        |
| ENSGALT0000 Uncharacterized protein | ENSGALG000000227 0.737462  | 39       |
| ENSGALT0000 Uncharacterized protein | ENSGALG000000227 0.930282  | 12.5     |
| ENSGALT0000 Uncharacterized protein | ENSGALG000000227 0.464758  | 0        |
| ENSGALT0000 Uncharacterized protein | ENSGALG000000227 0         | 0        |
| ENSGALT0000 Uncharacterized protein | ENSGALG000000227 0.966518  | 673.998  |
| ENSGALT0000 \N                      | ENSGALG000000227 ?         | 0        |
| ENSGALT0000 \N                      | ENSGALG000000227 ?         | 0        |
| ENSGALT0000 Uncharacterized protein | ENSGALG000000227 0.911822  | 21.5     |
| ENSGALT0000 \N                      | ENSGALG000000227 ?         | 0        |
| ENSGALT0000 Uncharacterized protein | ENSGALG000000227 0.992707  | 182      |
| ENSGALT0000 \N                      | ENSGALG000000227 ?         | 0        |
| ENSGALT0000 \N                      | ENSGALG000000227 ?         | 0        |
| ENSGALT0000 \N                      | ENSGALG000000227 ?         | 0        |
| ENSGALT0000 Uncharacterized protein | ENSGALG000000227 ?         | 0        |
| ENSGALT0000 Uncharacterized protein | ENSGALG000000227 0.769873  | 3        |
| ENSGALT0000 Uncharacterized protein | ENSGALG000000227 0.150565  | 0        |
| ENSGALT0000 Uncharacterized protein | ENSGALG000000227 0.569146  | 0.31467  |
| ENSGALT0000 Uncharacterized protein | ENSGALG000000227 0.569146  | 0.31467  |
| ENSGALT0000 Uncharacterized protein | ENSGALG000000227 0.464869  | 1.49826  |
| ENSGALT0000 Uncharacterized protein | ENSGALG000000227 0.543335  | 0.3125   |
| ENSGALT0000 Uncharacterized protein | ENSGALG000000227 0.963388  | 257.5    |
| ENSGALT0000 Uncharacterized protein | ENSGALG000000227 ?         | 0        |
| ENSGALT0000 Uncharacterized protein | ENSGALG000000227 ?         | 0        |
| ENSGALT0000 Uncharacterized protein | ENSGALG000000227 0.464758  | 0.16667  |
| ENSGALT0000 Uncharacterized protein | ENSGALG000000227 0.464758  | 0.16667  |
| ENSGALT0000 Uncharacterized protein | ENSGALG000000227 0.925945  | 1.5      |
| ENSGALT0000 Uncharacterized protein | ENSGALG000000227 ?         | 0        |
| ENSGALT0000 \N                      | ENSGALG000000227 ?         | 0        |
| ENSGALT0000 Uncharacterized protein | ENSGALG000000227 0.980176  | 417.5    |
| ENSGALT0000 \N                      | ENSGALG000000227 ?         | 0        |
| ENSGALT0000 \N                      | ENSGALG000000227 ?         | 0        |
| ENSGALT0000 Uncharacterized protein | ENSGALG000000227 0.464758  | 0        |
| ENSGALT0000 Uncharacterized protein | ENSGALG000000227 0.603682  | 0        |
| ENSGALT0000 Uncharacterized protein | ENSGALG000000227 0.780657  | 1.5      |
| ENSGALT0000 Uncharacterized protein | ENSGALG000000227 0.99306   | 193.5    |
| ENSGALT0000 Uncharacterized protein | ENSGALG000000227 0.80867   | 13.5     |
| ENSGALT0000 Uncharacterized protein | ENSGALG000000227 ?         | 0        |
| ENSGALT0000 Uncharacterized protein | ENSGALG000000227 0.673403  | 120      |
| ENSGALT0000 Uncharacterized protein | ENSGALG000000227 0.999092  | 1105.5   |
| ENSGALT0000 Uncharacterized protein | ENSGALG000000227 ?         | 0        |
| ENSGALT0000 Uncharacterized protein | ENSGALG000000227 ?         | 0        |
| ENSGALT0000 Uncharacterized protein | ENSGALG000000227 0.737335  | 2.29038  |
| ENSGALT0000 Uncharacterized protein | ENSGALG000000227 0.603682  | 0.25     |
| ENSGALT0000 Uncharacterized protein | ENSGALG000000227 0.464758  | 1.43E-08 |
| ENSGALT0000 Uncharacterized protein | ENSGALG000000227 0.980281  | 242      |
| ENSGALT0000 Uncharacterized protein | ENSGALG000000227 0.685712  | 25.6339  |
| ENSGALT0000 Uncharacterized protein | ENSGALG000000227 0.342787  | 3.47964  |
| ENSGALT0000 Uncharacterized protein | ENSGALG000000227 0.887839  | 4        |
| ENSGALT0000 Uncharacterized protein | ENSGALG000000227 0.91023   | 24.5     |
| ENSGALT0000 Uncharacterized protein | ENSGALG000000227 0.0085035 | 0.55888  |
| ENSGALT0000 Uncharacterized protein | ENSGALG000000227 0.966162  | 6.92282  |
| ENSGALT0000 Uncharacterized protein | ENSGALG000000227 0.914235  | 8.79823  |
| ENSGALT0000 Uncharacterized protein | ENSGALG000000227 0.924695  | 18.0485  |
| ENSGALT0000 Uncharacterized protein | ENSGALG000000228 0.998054  | 253.5    |
| ENSGALT0000 Uncharacterized protein | ENSGALG000000228 0.980848  | 153.5    |



|                                     |                           |          |
|-------------------------------------|---------------------------|----------|
| ENSGALT0000 Uncharacterized protein | ENSGALG000000228 0.896164 | 831.5    |
| ENSGALT0000 Uncharacterized protein | ENSGALG000000228 0.649519 | 0.5      |
| ENSGALT0000 Uncharacterized protein | ENSGALG000000228 0.754728 | 0.5      |
| ENSGALT0000 Uncharacterized protein | ENSGALG000000228 0.464758 | 0.5      |
| ENSGALT0000 Uncharacterized protein | ENSGALG000000228 0.944959 | 21.5     |
| ENSGALT0000 Uncharacterized protein | ENSGALG000000228 0.464758 | 0        |
| ENSGALT0000 \N                      | ENSGALG000000228 0.838966 | 8.5      |
| ENSGALT0000 Uncharacterized protein | ENSGALG000000228 0.780657 | 1.5      |
| ENSGALT0000 Uncharacterized protein | ENSGALG000000228 0.653755 | 3.98201  |
| ENSGALT0000 Uncharacterized protein | ENSGALG000000228 ?        | 0        |
| ENSGALT0000 Uncharacterized protein | ENSGALG000000228 0.957787 | 398      |
| ENSGALT0000 Uncharacterized protein | ENSGALG000000228 0.754734 | 18.9237  |
| ENSGALT0000 Uncharacterized protein | ENSGALG000000228 ?        | 0        |
| ENSGALT0000 Uncharacterized protein | ENSGALG000000228 ?        | 0        |
| ENSGALT0000 Uncharacterized protein | ENSGALG000000228 ?        | 0        |
| ENSGALT0000 Uncharacterized protein | ENSGALG000000228 0.984382 | 70.5     |
| ENSGALT0000 Uncharacterized protein | ENSGALG000000228 0.850701 | 1.5      |
| ENSGALT0000 Uncharacterized protein | ENSGALG000000228 0.731094 | 3.5      |
| ENSGALT0000 \N                      | ENSGALG000000228 0.411389 | 31       |
| ENSGALT0000 Uncharacterized protein | ENSGALG000000228 0.954991 | 191      |
| ENSGALT0000 Uncharacterized protein | ENSGALG000000228 0.465273 | 32.8508  |
| ENSGALT0000 Uncharacterized protein | ENSGALG000000228 0.534404 | 0        |
| ENSGALT0000 Uncharacterized protein | ENSGALG000000228 0.907441 | 4.4808   |
| ENSGALT0000 Uncharacterized protein | ENSGALG000000228 0.580649 | 1        |
| ENSGALT0000 Uncharacterized protein | ENSGALG000000228 0.626003 | 4.37733  |
| ENSGALT0000 Uncharacterized protein | ENSGALG000000228 0.776684 | 578.657  |
| ENSGALT0000 Uncharacterized protein | ENSGALG000000228 0.955888 | 51.2479  |
| ENSGALT0000 Uncharacterized protein | ENSGALG000000228 0.973478 | 277      |
| ENSGALT0000 Uncharacterized protein | ENSGALG000000228 0.984704 | 1264     |
| ENSGALT0000 Uncharacterized protein | ENSGALG000000228 0.574657 | 149.42   |
| ENSGALT0000 Uncharacterized protein | ENSGALG000000228 0.649519 | 0.5      |
| ENSGALT0000 Uncharacterized protein | ENSGALG000000228 ?        | 0        |
| ENSGALT0000 Uncharacterized protein | ENSGALG000000228 0.621817 | 56       |
| ENSGALT0000 \N                      | ENSGALG000000228 0.469245 | 0.27157  |
| ENSGALT0000 Uncharacterized protein | ENSGALG000000228 0.736063 | 73.3283  |
| ENSGALT0000 Uncharacterized protein | ENSGALG000000228 0.815983 | 123.5    |
| ENSGALT0000 Uncharacterized protein | ENSGALG000000228 0.733505 | 2        |
| ENSGALT0000 Uncharacterized protein | ENSGALG000000228 0.832954 | 261.744  |
| ENSGALT0000 Uncharacterized protein | ENSGALG000000228 0.712363 | 232.335  |
| ENSGALT0000 Uncharacterized protein | ENSGALG000000228 0.275219 | 38.4217  |
| ENSGALT0000 Uncharacterized protein | ENSGALG000000228 0.965946 | 12.5     |
| ENSGALT0000 Uncharacterized protein | ENSGALG000000228 0.836902 | 62.5     |
| ENSGALT0000 Uncharacterized protein | ENSGALG000000228 0.982679 | 36       |
| ENSGALT0000 Uncharacterized protein | ENSGALG000000228 0.593421 | 8.34E-27 |
| ENSGALT0000 Uncharacterized protein | ENSGALG000000228 0.820501 | 166.5    |
| ENSGALT0000 Uncharacterized protein | ENSGALG000000228 0.882433 | 3        |
| ENSGALT0000 \N                      | ENSGALG000000228 ?        | 0        |
| ENSGALT0000 \N                      | ENSGALG000000228 0.371997 | 0.33333  |
| ENSGALT0000 Uncharacterized protein | ENSGALG000000228 0.997334 | 179.5    |
| ENSGALT0000 Uncharacterized protein | ENSGALG000000228 0.475488 | 0.03743  |
| ENSGALT0000 Uncharacterized protein | ENSGALG000000228 0.494106 | 1.5      |
| ENSGALT0000 Uncharacterized protein | ENSGALG000000228 0.751048 | 137.355  |
| ENSGALT0000 Uncharacterized protein | ENSGALG000000228 0.97039  | 71       |
| ENSGALT0000 Uncharacterized protein | ENSGALG000000228 0.94939  | 3.5      |
| ENSGALT0000 Uncharacterized protein | ENSGALG000000228 0.606519 | 3.50743  |
| ENSGALT0000 Uncharacterized protein | ENSGALG000000228 0.939858 | 61       |

|                                     |                            |          |
|-------------------------------------|----------------------------|----------|
| ENSGALT0000 Uncharacterized protein | ENSGALG00000022E 0.667988  | 4        |
| ENSGALT0000 Uncharacterized protein | ENSGALG00000022E 0.464758  | 0        |
| ENSGALT0000 Uncharacterized protein | ENSGALG00000022E 0.647596  | 29.8769  |
| ENSGALT0000 \N                      | ENSGALG00000022E ?         | 0        |
| ENSGALT0000 Uncharacterized protein | ENSGALG00000022E 0.846336  | 4        |
| ENSGALT0000 Uncharacterized protein | ENSGALG00000022E 0.740073  | 4        |
| ENSGALT0000 \N                      | ENSGALG00000022E ?         | 0        |
| ENSGALT0000 Uncharacterized protein | ENSGALG00000022E 0.870834  | 6.5      |
| ENSGALT0000 \N                      | ENSGALG00000022E ?         | 0        |
| ENSGALT0000 Uncharacterized protein | ENSGALG00000022E 0.883357  | 61.1427  |
| ENSGALT0000 Uncharacterized protein | ENSGALG00000022E 0.810549  | 358.857  |
| ENSGALT0000 Uncharacterized protein | ENSGALG00000022E 0.99806   | 168.84   |
| ENSGALT0000 \N                      | ENSGALG00000022E ?         | 1.48E-16 |
| ENSGALT0000 Uncharacterized protein | ENSGALG00000022E 0.876113  | 17.5     |
| ENSGALT0000 Uncharacterized protein | ENSGALG00000022E 0.179532  | 340.159  |
| ENSGALT0000 \N                      | ENSGALG00000022E ?         | 0        |
| ENSGALT0000 \N                      | ENSGALG00000022E ?         | 0        |
| ENSGALT0000 Uncharacterized protein | ENSGALG00000022E 0.907655  | 104      |
| ENSGALT0000 Uncharacterized protein | ENSGALG00000022E 0.845469  | 1.26E-06 |
| ENSGALT0000 Uncharacterized protein | ENSGALG00000022E 0.0992528 | 1.49998  |
| ENSGALT0000 \N                      | ENSGALG00000022E ?         | 0        |
| ENSGALT0000 Uncharacterized protein | ENSGALG00000022E 0.953397  | 150      |
| ENSGALT0000 Uncharacterized protein | ENSGALG00000022E ?         | 0        |
| ENSGALT0000 Uncharacterized protein | ENSGALG00000022E ?         | 0        |
| ENSGALT0000 Uncharacterized protein | ENSGALG00000022E ?         | 0        |
| ENSGALT0000 Uncharacterized protein | ENSGALG00000022E ?         | 0        |
| ENSGALT0000 \N                      | ENSGALG00000022E 0.915326  | 214      |
| ENSGALT0000 Uncharacterized protein | ENSGALG00000022E 0.961598  | 124.5    |
| ENSGALT0000 Uncharacterized protein | ENSGALG00000022E ?         | 0        |
| ENSGALT0000 Uncharacterized protein | ENSGALG00000022E ?         | 0        |
| ENSGALT0000 Uncharacterized protein | ENSGALG00000022E ?         | 0        |
| ENSGALT0000 Uncharacterized protein | ENSGALG00000022E ?         | 0        |
| ENSGALT0000 Uncharacterized protein | ENSGALG00000022E 0.951166  | 160      |
| ENSGALT0000 Uncharacterized protein | ENSGALG00000022E 0.952517  | 198.5    |
| ENSGALT0000 Uncharacterized protein | ENSGALG00000022E 0.926676  | 242.5    |
| ENSGALT0000 Uncharacterized protein | ENSGALG00000022E 0.464758  | 0        |
| ENSGALT0000 Uncharacterized protein | ENSGALG00000022E ?         | 0        |
| ENSGALT0000 \N                      | ENSGALG00000022E ?         | 0        |
| ENSGALT0000 \N                      | ENSGALG00000022E ?         | 0        |
| ENSGALT0000 \N                      | ENSGALG00000022E 0.604344  | 0.61667  |
| ENSGALT0000 \N                      | ENSGALG00000022E 0.604344  | 0.61667  |
| ENSGALT0000 Uncharacterized protein | ENSGALG00000022E 0.464758  | 0        |
| ENSGALT0000 Uncharacterized protein | ENSGALG00000022E 0.990066  | 368      |
| ENSGALT0000 \N                      | ENSGALG00000022E ?         | 0        |
| ENSGALT0000 Uncharacterized protein | ENSGALG00000022E 0.96273   | 29.4979  |
| ENSGALT0000 Uncharacterized protein | ENSGALG00000022E 0.464758  | 0.22888  |
| ENSGALT0000 Uncharacterized protein | ENSGALG00000022E 0.855147  | 103.5    |
| ENSGALT0000 Uncharacterized protein | ENSGALG00000022E 0.464758  | 0        |
| ENSGALT0000 Uncharacterized protein | ENSGALG00000022E 0.867204  | 2120.5   |
| ENSGALT0000 Uncharacterized protein | ENSGALG00000022E ?         | 0        |
| ENSGALT0000 Uncharacterized protein | ENSGALG00000022E ?         | 0        |
| ENSGALT0000 \N                      | ENSGALG00000022E ?         | 0        |
| ENSGALT0000 Uncharacterized protein | ENSGALG00000022E ?         | 0        |
| ENSGALT0000 Uncharacterized protein | ENSGALG00000022E ?         | 0        |
| ENSGALT0000 Uncharacterized protein | ENSGALG00000022E ?         | 0        |
| ENSGALT0000 Uncharacterized protein | ENSGALG00000022E ?         | 0        |

|                                     |                           |          |
|-------------------------------------|---------------------------|----------|
| ENSGALT0000 Uncharacterized protein | ENSGALG000000229 0.46475  | 0.00057  |
| ENSGALT0000 Uncharacterized protein | ENSGALG000000229 0.944037 | 224.776  |
| ENSGALT0000 Uncharacterized protein | ENSGALG000000229 0.853815 | 1        |
| ENSGALT0000 Uncharacterized protein | ENSGALG000000229 0.464758 | 0        |
| ENSGALT0000 Uncharacterized protein | ENSGALG000000229 0.816612 | 213      |
| ENSGALT0000 Uncharacterized protein | ENSGALG000000229 ?        | 0        |
| ENSGALT0000 Uncharacterized protein | ENSGALG000000229 0.642817 | 741.5    |
| ENSGALT0000 Uncharacterized protein | ENSGALG000000229 0.861679 | 50.5     |
| ENSGALT0000 Uncharacterized protein | ENSGALG000000229 0.625594 | 874.396  |
| ENSGALT0000 Uncharacterized protein | ENSGALG000000229 0.984493 | 151.621  |
| ENSGALT0000 \N                      | ENSGALG000000229 ?        | 0        |
| ENSGALT0000 Uncharacterized protein | ENSGALG000000229 0.43452  | 7.5      |
| ENSGALT0000 Uncharacterized protein | ENSGALG000000229 0.784355 | 2129.88  |
| ENSGALT0000 Uncharacterized protein | ENSGALG000000229 0.864212 | 14.4134  |
| ENSGALT0000 Uncharacterized protein | ENSGALG000000229 0.608556 | 8        |
| ENSGALT0000 Uncharacterized protein | ENSGALG000000229 0.96982  | 15.4965  |
| ENSGALT0000 \N                      | ENSGALG000000229 0.371997 | 0.33333  |
| ENSGALT0000 \N                      | ENSGALG000000229 0.371997 | 0.33333  |
| ENSGALT0000 \N                      | ENSGALG000000229 0.464758 | 0        |
| ENSGALT0000 Uncharacterized protein | ENSGALG000000229 0.464758 | 5.64E-31 |
| ENSGALT0000 Uncharacterized protein | ENSGALG000000229 0.842636 | 2.05302  |
| ENSGALT0000 Uncharacterized protein | ENSGALG000000229 0.547037 | 13.5     |
| ENSGALT0000 Uncharacterized protein | ENSGALG000000229 0.571219 | 4.82329  |
| ENSGALT0000 Uncharacterized protein | ENSGALG000000229 0.427545 | 4.02E-06 |
| ENSGALT0000 Uncharacterized protein | ENSGALG000000229 0.944514 | 12.5     |
| ENSGALT0000 Uncharacterized protein | ENSGALG000000229 0.985418 | 48.3963  |
| ENSGALT0000 Uncharacterized protein | ENSGALG000000229 ?        | 0        |
| ENSGALT0000 Uncharacterized protein | ENSGALG000000229 0.998107 | 56.5     |
| ENSGALT0000 Uncharacterized protein | ENSGALG000000229 0.749343 | 1        |
| ENSGALT0000 Uncharacterized protein | ENSGALG000000229 0.937334 | 4.34234  |
| ENSGALT0000 Uncharacterized protein | ENSGALG000000229 0.991881 | 209.5    |
| ENSGALT0000 Uncharacterized protein | ENSGALG000000229 0.603682 | 0.5      |
| ENSGALT0000 Uncharacterized protein | ENSGALG000000229 0.975311 | 181      |
| ENSGALT0000 Uncharacterized protein | ENSGALG000000229 0.914319 | 92.5975  |
| ENSGALT0000 Uncharacterized protein | ENSGALG000000229 0.971726 | 39.5     |
| ENSGALT0000 Uncharacterized protein | ENSGALG000000229 0.971165 | 78       |
| ENSGALT0000 Uncharacterized protein | ENSGALG000000229 0.825706 | 23.2168  |
| ENSGALT0000 Uncharacterized protein | ENSGALG000000229 0.908992 | 394.941  |
| ENSGALT0000 Uncharacterized protein | ENSGALG000000229 ?        | 8.69E-21 |
| ENSGALT0000 Uncharacterized protein | ENSGALG000000229 ?        | 0        |
| ENSGALT0000 Uncharacterized protein | ENSGALG000000229 0.933294 | 34       |
| ENSGALT0000 Uncharacterized protein | ENSGALG000000230 0.722096 | 1.5      |
| ENSGALT0000 Uncharacterized protein | ENSGALG000000230 0.988278 | 94       |
| ENSGALT0000 Uncharacterized protein | ENSGALG000000230 0.89489  | 36       |
| ENSGALT0000 Uncharacterized protein | ENSGALG000000230 0.822811 | 57.0896  |
| ENSGALT0000 Uncharacterized protein | ENSGALG000000230 0.956791 | 15.312   |
| ENSGALT0000 Uncharacterized protein | ENSGALG000000230 0.853815 | 0.5      |
| ENSGALT0000 Uncharacterized protein | ENSGALG000000230 0.901504 | 7.5      |
| ENSGALT0000 Uncharacterized protein | ENSGALG000000230 0.481526 | 9.92E-18 |
| ENSGALT0000 Uncharacterized protein | ENSGALG000000230 0.603682 | 2        |
| ENSGALT0000 Uncharacterized protein | ENSGALG000000230 0.440513 | 1.5      |
| ENSGALT0000 Uncharacterized protein | ENSGALG000000230 0.999667 | 165.5    |
| ENSGALT0000 Uncharacterized protein | ENSGALG000000230 0.464758 | 0        |
| ENSGALT0000 Uncharacterized protein | ENSGALG000000230 0.935911 | 38.5     |
| ENSGALT0000 Uncharacterized protein | ENSGALG000000230 0.984166 | 109.5    |
| ENSGALT0000 Uncharacterized protein | ENSGALG000000230 0.988966 | 74       |

|                                     |                           |          |
|-------------------------------------|---------------------------|----------|
| ENSGALT0000 Uncharacterized protein | ENSGALG00000023C 0.875241 | 27.5     |
| ENSGALT0000 Uncharacterized protein | ENSGALG00000023C ?        | 0        |
| ENSGALT0000 Uncharacterized protein | ENSGALG00000023C ?        | 0        |
| ENSGALT0000 Uncharacterized protein | ENSGALG00000023C 0.464758 | 0        |
| ENSGALT0000 Uncharacterized protein | ENSGALG00000023C 0.464758 | 0        |
| ENSGALT0000 Uncharacterized protein | ENSGALG00000023C 0.592174 | 0.54496  |
| ENSGALT0000 \N                      | ENSGALG00000023C ?        | 0        |
| ENSGALT0000 Uncharacterized protein | ENSGALG00000023C 0.922418 | 1330.53  |
| ENSGALT0000 Uncharacterized protein | ENSGALG00000023C 0.998536 | 153      |
| ENSGALT0000 Uncharacterized protein | ENSGALG00000023C 0.19245  | 0.5      |
| ENSGALT0000 Uncharacterized protein | ENSGALG00000023C ?        | 0        |
| ENSGALT0000 Uncharacterized protein | ENSGALG00000023C 0.953082 | 85       |
| ENSGALT0000 Uncharacterized protein | ENSGALG00000023C 0.973066 | 3.07784  |
| ENSGALT0000 Uncharacterized protein | ENSGALG00000023C 0.579113 | 1.56942  |
| ENSGALT0000 Uncharacterized protein | ENSGALG00000023C 0.781659 | 4.69762  |
| ENSGALT0000 Uncharacterized protein | ENSGALG00000023C 0.464975 | 1.97E-08 |
| ENSGALT0000 Uncharacterized protein | ENSGALG00000023C 1        | 2        |
| ENSGALT0000 Uncharacterized protein | ENSGALG00000023C 0.864878 | 0.92586  |
| ENSGALT0000 Uncharacterized protein | ENSGALG00000023C 0.999992 | 1.5      |
| ENSGALT0000 Uncharacterized protein | ENSGALG00000023C 0.952138 | 14.5     |
| ENSGALT0000 Uncharacterized protein | ENSGALG00000023C 0.972542 | 287.5    |
| ENSGALT0000 Uncharacterized protein | ENSGALG00000023C 0.562993 | 0        |
| ENSGALT0000 Uncharacterized protein | ENSGALG00000023C 0.966973 | 36       |
| ENSGALT0000 Uncharacterized protein | ENSGALG00000023C 0.980446 | 227.5    |
| ENSGALT0000 Uncharacterized protein | ENSGALG00000023C 0.99211  | 66       |
| ENSGALT0000 Uncharacterized protein | ENSGALG00000023C ?        | 0        |
| ENSGALT0000 Uncharacterized protein | ENSGALG00000023C 0.878877 | 26.1071  |
| ENSGALT0000 Uncharacterized protein | ENSGALG00000023C 0.608315 | 149.214  |
| ENSGALT0000 Uncharacterized protein | ENSGALG00000023C 0.87179  | 8        |
| ENSGALT0000 Uncharacterized protein | ENSGALG00000023C 0.108931 | 560.868  |
| ENSGALT0000 Uncharacterized protein | ENSGALG00000023C 0.791063 | 45.5     |
| ENSGALT0000 Uncharacterized protein | ENSGALG00000023C 0.865954 | 118.5    |
| ENSGALT0000 Uncharacterized protein | ENSGALG00000023C 0.870467 | 85       |
| ENSGALT0000 Uncharacterized protein | ENSGALG00000023C 0.7602   | 1287     |
| ENSGALT0000 Uncharacterized protein | ENSGALG00000023C 0.72167  | 1085.5   |
| ENSGALT0000 \N                      | ENSGALG00000023C 0.464758 | 0        |
| ENSGALT0000 Uncharacterized protein | ENSGALG00000023C 0.980815 | 41       |
| ENSGALT0000 Uncharacterized protein | ENSGALG00000023C 0.591406 | 236.784  |
| ENSGALT0000 Uncharacterized protein | ENSGALG00000023C 0.971941 | 573.467  |
| ENSGALT0000 Uncharacterized protein | ENSGALG00000023C 0.565037 | 13.5     |
| ENSGALT0000 \N                      | ENSGALG00000023C ?        | 0        |
| ENSGALT0000 Uncharacterized protein | ENSGALG00000023C 0.695077 | 4.34001  |
| ENSGALT0000 Uncharacterized protein | ENSGALG00000023C ?        | 0        |
| ENSGALT0000 Uncharacterized protein | ENSGALG00000023C 0.989307 | 397.5    |
| ENSGALT0000 Uncharacterized protein | ENSGALG00000023C 0.605075 | 1        |
| ENSGALT0000 Uncharacterized protein | ENSGALG00000023C 0.585662 | 4        |
| ENSGALT0000 Uncharacterized protein | ENSGALG00000023C 0.939754 | 106.5    |
| ENSGALT0000 Uncharacterized protein | ENSGALG00000023C ?        | 0        |
| ENSGALT0000 \N                      | ENSGALG00000023C ?        | 0        |
| ENSGALT0000 Uncharacterized protein | ENSGALG00000023C 0.956242 | 26.5     |
| ENSGALT0000 Uncharacterized protein | ENSGALG00000023C 0.458652 | 80       |
| ENSGALT0000 Uncharacterized protein | ENSGALG00000023C 0.999545 | 7.74568  |
| ENSGALT0000 Uncharacterized protein | ENSGALG00000023C 0.873298 | 15       |
| ENSGALT0000 Uncharacterized protein | ENSGALG00000023C 0.806823 | 3        |
| ENSGALT0000 Uncharacterized protein | ENSGALG0000002310.691118  | 3        |
| ENSGALT0000 Uncharacterized protein | ENSGALG0000002310.927942  | 13       |

|                                     |                           |         |
|-------------------------------------|---------------------------|---------|
| ENSGALT0000 Uncharacterized protein | ENSGALG0000002310.996974  | 616.53  |
| ENSGALT0000 Uncharacterized protein | ENSGALG0000002310.940336  | 10.322  |
| ENSGALT0000 Uncharacterized protein | ENSGALG0000002310.853815  | 0.5     |
| ENSGALT0000 Uncharacterized protein | ENSGALG0000002310.948355  | 20      |
| ENSGALT0000 Uncharacterized protein | ENSGALG0000002310.996213  | 805.703 |
| ENSGALT0000 Uncharacterized protein | ENSGALG0000002310.780531  | 10      |
| ENSGALT0000 Uncharacterized protein | ENSGALG0000002310.238528  | 11      |
| ENSGALT0000 Uncharacterized protein | ENSGALG0000002310.940381  | 187.966 |
| ENSGALT0000 Uncharacterized protein | ENSGALG0000002310.965635  | 117     |
| ENSGALT0000 Uncharacterized protein | ENSGALG0000002310.889193  | 478.5   |
| ENSGALT0000 Uncharacterized protein | ENSGALG0000002310.877118  | 9.80522 |
| ENSGALT0000 Uncharacterized protein | ENSGALG0000002310.990619  | 94      |
| ENSGALT0000 Uncharacterized protein | ENSGALG0000002310.0370558 | 103.968 |
| ENSGALT0000 Uncharacterized protein | ENSGALG0000002310.952168  | 13.5    |
| ENSGALT0000 Uncharacterized protein | ENSGALG0000002310.603682  | 0       |
| ENSGALT0000 Uncharacterized protein | ENSGALG0000002310.885716  | 46.2101 |
| ENSGALT0000 Uncharacterized protein | ENSGALG0000002310.987306  | 268     |
| ENSGALT0000 Uncharacterized protein | ENSGALG0000002310.925926  | 88.5    |
| ENSGALT0000 Uncharacterized protein | ENSGALG0000002310.822684  | 367.134 |
| ENSGALT0000 Uncharacterized protein | ENSGALG0000002310.939975  | 34.2836 |
| ENSGALT0000 Uncharacterized protein | ENSGALG000000231?         | 0       |
| ENSGALT0000 Uncharacterized protein | ENSGALG0000002310.820682  | 65      |
| ENSGALT0000 Uncharacterized protein | ENSGALG0000002310.905082  | 58.8078 |
| ENSGALT0000 Uncharacterized protein | ENSGALG0000002310.922745  | 5.5     |
| ENSGALT0000 Uncharacterized protein | ENSGALG000000231?         | 0       |
| ENSGALT0000 Uncharacterized protein | ENSGALG0000002310.732387  | 27      |
| ENSGALT0000 Uncharacterized protein | ENSGALG000000231?         | 0       |
| ENSGALT0000 Uncharacterized protein | ENSGALG000000231?         | 0       |
| ENSGALT0000 Uncharacterized protein | ENSGALG0000002310.993191  | 209     |
| ENSGALT0000 Uncharacterized protein | ENSGALG000000231?         | 0       |
| ENSGALT0000 \N                      | ENSGALG000000231?         | 0       |
| ENSGALT0000 Uncharacterized protein | ENSGALG000000231?         | 0       |
| ENSGALT0000 Uncharacterized protein | ENSGALG000000231?         | 0       |
| ENSGALT0000 Uncharacterized protein | ENSGALG0000002310.777579  | 3.9133  |
| ENSGALT0000 Uncharacterized protein | ENSGALG0000002310.913788  | 57.5    |
| ENSGALT0000 Uncharacterized protein | ENSGALG0000002310.532475  | 206.704 |
| ENSGALT0000 Uncharacterized protein | ENSGALG0000002310.631223  | 0       |
| ENSGALT0000 Uncharacterized protein | ENSGALG0000002310.924244  | 14      |
| ENSGALT0000 Uncharacterized protein | ENSGALG0000002310.324171  | 0.01173 |
| ENSGALT0000 Uncharacterized protein | ENSGALG0000002310.620297  | 0.06825 |
| ENSGALT0000 Uncharacterized protein | ENSGALG0000002310.97866   | 69.5    |
| ENSGALT0000 Uncharacterized protein | ENSGALG0000002310.951752  | 140     |
| ENSGALT0000 Uncharacterized protein | ENSGALG0000002310.894339  | 2.73904 |
| ENSGALT0000 Uncharacterized protein | ENSGALG0000002310.954028  | 3.5     |
| ENSGALT0000 \N                      | ENSGALG0000002310.464758  | 0.03769 |
| ENSGALT0000 Uncharacterized protein | ENSGALG0000002310.729631  | 730.587 |
| ENSGALT0000 \N                      | ENSGALG0000002310.464758  | 0.02096 |
| ENSGALT0000 Uncharacterized protein | ENSGALG0000002310.904804  | 1.5     |
| ENSGALT0000 \N                      | ENSGALG0000002310.464758  | 0.06825 |
| ENSGALT0000 Uncharacterized protein | ENSGALG0000002310.966135  | 358.499 |
| ENSGALT0000 Uncharacterized protein | ENSGALG0000002310.772955  | 53.4681 |
| ENSGALT0000 Uncharacterized protein | ENSGALG0000002310.983235  | 641.5   |
| ENSGALT0000 Uncharacterized protein | ENSGALG0000002310.925814  | 53      |
| ENSGALT0000 Uncharacterized protein | ENSGALG0000002310.464758  | 0.03769 |
| ENSGALT0000 Uncharacterized protein | ENSGALG0000002310.620297  | 0.01173 |
| ENSGALT0000 Uncharacterized protein | ENSGALG0000002310.780657  | 3       |

|                                     |                           |         |
|-------------------------------------|---------------------------|---------|
| ENSGALT0000 Uncharacterized protein | ENSGALG0000002310.967103  | 419.5   |
| ENSGALT0000 \N                      | ENSGALG0000002310.464758  | 0.02096 |
| ENSGALT0000 Uncharacterized protein | ENSGALG0000002310.464758  | 0.01173 |
| ENSGALT0000 Uncharacterized protein | ENSGALG0000002310.827763  | 138     |
| ENSGALT0000 Uncharacterized protein | ENSGALG0000002310.920966  | 50.5    |
| ENSGALT0000 Uncharacterized protein | ENSGALG0000002310.34772   | 246.046 |
| ENSGALT0000 Uncharacterized protein | ENSGALG0000002310.823274  | 6.54264 |
| ENSGALT0000 Uncharacterized protein | ENSGALG0000002310.0539949 | 0       |
| ENSGALT0000 Uncharacterized protein | ENSGALG0000002310.394541  | 7.79249 |
| ENSGALT0000 Uncharacterized protein | ENSGALG0000002310.995315  | 100     |
| ENSGALT0000 Uncharacterized protein | ENSGALG0000002310.749343  | 1       |
| ENSGALT0000 Uncharacterized protein | ENSGALG0000002310.959835  | 145.435 |
| ENSGALT0000 Uncharacterized protein | ENSGALG0000002310.65145   | 10.5163 |
| ENSGALT0000 Uncharacterized protein | ENSGALG0000002310.983966  | 29.7864 |
| ENSGALT0000 Uncharacterized protein | ENSGALG0000002320.987307  | 16      |
| ENSGALT0000 Uncharacterized protein | ENSGALG0000002320.998894  | 421     |
| ENSGALT0000 Uncharacterized protein | ENSGALG0000002320.969672  | 237     |
| ENSGALT0000 Uncharacterized protein | ENSGALG0000002320.766744  | 372.5   |
| ENSGALT0000 Uncharacterized protein | ENSGALG0000002320.962841  | 29.2115 |
| ENSGALT0000 Uncharacterized protein | ENSGALG0000002320.853815  | 1       |
| ENSGALT0000 Uncharacterized protein | ENSGALG0000002320.855454  | 7       |
| ENSGALT0000 Uncharacterized protein | ENSGALG0000002320.985995  | 9       |
| ENSGALT0000 Uncharacterized protein | ENSGALG0000002320.654603  | 40.205  |
| ENSGALT0000 Uncharacterized protein | ENSGALG0000002320.782374  | 1077.6  |
| ENSGALT0000 Uncharacterized protein | ENSGALG0000002320.788652  | 5.5     |
| ENSGALT0000 Uncharacterized protein | ENSGALG0000002320.846637  | 408.457 |
| ENSGALT0000 Uncharacterized protein | ENSGALG0000002320.931245  | 357.56  |
| ENSGALT0000 Uncharacterized protein | ENSGALG0000002320.334142  | 2.12432 |
| ENSGALT0000 Uncharacterized protein | ENSGALG0000002320.992629  | 190     |
| ENSGALT0000 Uncharacterized protein | ENSGALG0000002320.996166  | 374.5   |
| ENSGALT0000 Uncharacterized protein | ENSGALG0000002320.804917  | 45.5    |
| ENSGALT0000 Uncharacterized protein | ENSGALG0000002320.964893  | 289.116 |
| ENSGALT0000 \N                      | ENSGALG0000002320.913842  | 188     |
| ENSGALT0000 Uncharacterized protein | ENSGALG0000002320.871664  | 4.5     |
| ENSGALT0000 Uncharacterized protein | ENSGALG0000002320.464758  | 0       |
| ENSGALT0000 Uncharacterized protein | ENSGALG0000002320.977187  | 315     |
| ENSGALT0000 Uncharacterized protein | ENSGALG0000002320.687692  | 0.95667 |
| ENSGALT0000 Uncharacterized protein | ENSGALG0000002320.813385  | 163.943 |
| ENSGALT0000 Uncharacterized protein | ENSGALG0000002320.591038  | 14.5787 |
| ENSGALT0000 \N                      | ENSGALG000000232 ?        | 0       |
| ENSGALT0000 Uncharacterized protein | ENSGALG0000002320.982903  | 133.539 |
| ENSGALT0000 Uncharacterized protein | ENSGALG0000002320.978611  | 114.908 |
| ENSGALT0000 Uncharacterized protein | ENSGALG0000002320.926428  | 325.5   |
| ENSGALT0000 Uncharacterized protein | ENSGALG0000002320.0558916 | 535.5   |
| ENSGALT0000 Uncharacterized protein | ENSGALG0000002320.882268  | 626     |
| ENSGALT0000 Uncharacterized protein | ENSGALG0000002320.89005   | 43.5    |
| ENSGALT0000 Uncharacterized protein | ENSGALG0000002320.704547  | 2.22325 |
| ENSGALT0000 Uncharacterized protein | ENSGALG0000002320.622135  | 21.03   |
| ENSGALT0000 Uncharacterized protein | ENSGALG0000002320.423701  | 112.5   |
| ENSGALT0000 Uncharacterized protein | ENSGALG000000232 ?        | 0       |
| ENSGALT0000 Uncharacterized protein | ENSGALG0000002320.948202  | 112.633 |
| ENSGALT0000 Uncharacterized protein | ENSGALG000000232 ?        | 0       |
| ENSGALT0000 Uncharacterized protein | ENSGALG0000002320.824805  | 3.5     |
| ENSGALT0000 Uncharacterized protein | ENSGALG0000002320.928902  | 2.61882 |
| ENSGALT0000 Uncharacterized protein | ENSGALG0000002320.965312  | 246     |
| ENSGALT0000 Uncharacterized protein | ENSGALG0000002320.265095  | 112.122 |

|                                     |                           |          |
|-------------------------------------|---------------------------|----------|
| ENSGALT0000 Uncharacterized protein | ENSGALG000000232 0.812097 | 1.62267  |
| ENSGALT0000 Uncharacterized protein | ENSGALG000000232 0.905874 | 592.095  |
| ENSGALT0000 Uncharacterized protein | ENSGALG000000232 0.849482 | 1        |
| ENSGALT0000 Uncharacterized protein | ENSGALG000000232 0.22068  | 5.49139  |
| ENSGALT0000 Uncharacterized protein | ENSGALG000000232 0.793937 | 275      |
| ENSGALT0000 Uncharacterized protein | ENSGALG000000232 0.89259  | 68.2421  |
| ENSGALT0000 Uncharacterized protein | ENSGALG000000232 0.988586 | 230.5    |
| ENSGALT0000 Uncharacterized protein | ENSGALG000000232 0.770695 | 19.2593  |
| ENSGALT0000 Uncharacterized protein | ENSGALG000000232 0.648905 | 14       |
| ENSGALT0000 Uncharacterized protein | ENSGALG000000232 0.667982 | 26.1597  |
| ENSGALT0000 Uncharacterized protein | ENSGALG000000232 1        | 1        |
| ENSGALT0000 Uncharacterized protein | ENSGALG000000232 0.485986 | 0.02033  |
| ENSGALT0000 Uncharacterized protein | ENSGALG000000232 0.961752 | 1434     |
| ENSGALT0000 Uncharacterized protein | ENSGALG000000232 0.464758 | 0.02096  |
| ENSGALT0000 Uncharacterized protein | ENSGALG000000232 0.560088 | 0.0001   |
| ENSGALT0000 Uncharacterized protein | ENSGALG000000232 0.99042  | 92.775   |
| ENSGALT0000 Uncharacterized protein | ENSGALG000000232 0.963872 | 272.5    |
| ENSGALT0000 Uncharacterized protein | ENSGALG000000232 0.993703 | 163.5    |
| ENSGALT0000 Uncharacterized protein | ENSGALG000000232 0.877775 | 89.9395  |
| ENSGALT0000 Uncharacterized protein | ENSGALG000000232 0.780657 | 1.5      |
| ENSGALT0000 Uncharacterized protein | ENSGALG000000232 0.898356 | 2        |
| ENSGALT0000 Uncharacterized protein | ENSGALG000000232 ?        | 0        |
| ENSGALT0000 Uncharacterized protein | ENSGALG000000233 0.949289 | 83.0661  |
| ENSGALT0000 Uncharacterized protein | ENSGALG000000233 0.464758 | 0        |
| ENSGALT0000 \N                      | ENSGALG000000233 0.866153 | 1751     |
| ENSGALT0000 Uncharacterized protein | ENSGALG000000233 0.385204 | 0.5      |
| ENSGALT0000 Uncharacterized protein | ENSGALG000000233 0.982694 | 949.5    |
| ENSGALT0000 Uncharacterized protein | ENSGALG000000233 0.988071 | 688.946  |
| ENSGALT0000 Uncharacterized protein | ENSGALG000000233 0.930505 | 817.409  |
| ENSGALT0000 Uncharacterized protein | ENSGALG000000233 0.984918 | 19.0302  |
| ENSGALT0000 Uncharacterized protein | ENSGALG000000233 0.95119  | 10.8428  |
| ENSGALT0000 Uncharacterized protein | ENSGALG000000233 0.909946 | 550.5    |
| ENSGALT0000 Uncharacterized protein | ENSGALG000000233 0.944834 | 59.6533  |
| ENSGALT0000 Uncharacterized protein | ENSGALG000000233 0.978565 | 68.7843  |
| ENSGALT0000 Uncharacterized protein | ENSGALG000000233 0.981021 | 137      |
| ENSGALT0000 Uncharacterized protein | ENSGALG000000233 0.975557 | 10       |
| ENSGALT0000 Uncharacterized protein | ENSGALG000000233 0        | 0        |
| ENSGALT0000 Uncharacterized protein | ENSGALG000000233 0.888397 | 17.5     |
| ENSGALT0000 Uncharacterized protein | ENSGALG000000233 0.98799  | 72.5     |
| ENSGALT0000 Uncharacterized protein | ENSGALG000000233 0.639897 | 2        |
| ENSGALT0000 Uncharacterized protein | ENSGALG000000233 ?        | 0        |
| ENSGALT0000 Uncharacterized protein | ENSGALG000000233 0.649519 | 0.5      |
| ENSGALT0000 Uncharacterized protein | ENSGALG000000233 0.947227 | 14.5856  |
| ENSGALT0000 Uncharacterized protein | ENSGALG000000233 0.984883 | 110      |
| ENSGALT0000 Uncharacterized protein | ENSGALG000000233 0.603682 | 0        |
| ENSGALT0000 Uncharacterized protein | ENSGALG000000233 ?        | 5.93E-11 |
| ENSGALT0000 Uncharacterized protein | ENSGALG000000233 0.81293  | 517.62   |
| ENSGALT0000 Uncharacterized protein | ENSGALG000000233 0.626564 | 63       |
| ENSGALT0000 Uncharacterized protein | ENSGALG000000233 0.929797 | 12.8147  |
| ENSGALT0000 Uncharacterized protein | ENSGALG000000233 0.990181 | 55.5     |
| ENSGALT0000 Uncharacterized protein | ENSGALG000000233 0.808886 | 21.5     |
| ENSGALT0000 Uncharacterized protein | ENSGALG000000233 ?        | 0        |
| ENSGALT0000 \N                      | ENSGALG000000233 0.968375 | 857.5    |
| ENSGALT0000 Uncharacterized protein | ENSGALG000000233 0.638378 | 18       |
| ENSGALT0000 Uncharacterized protein | ENSGALG000000233 0.930784 | 67       |
| ENSGALT0000 Uncharacterized protein | ENSGALG000000233 0.670814 | 1.5      |

|                                     |                            |          |
|-------------------------------------|----------------------------|----------|
| ENSGALT0000 Uncharacterized protein | ENSGALG000000233 0.332985  | 5.70289  |
| ENSGALT0000 Uncharacterized protein | ENSGALG000000233 0.794859  | 25.6865  |
| ENSGALT0000 Uncharacterized protein | ENSGALG000000233 0.729624  | 33.2626  |
| ENSGALT0000 Uncharacterized protein | ENSGALG000000233 0.695046  | 519.5    |
| ENSGALT0000 Uncharacterized protein | ENSGALG000000233 0.930658  | 38.5     |
| ENSGALT0000 Uncharacterized protein | ENSGALG000000233 0.626217  | 15.098   |
| ENSGALT0000 Uncharacterized protein | ENSGALG000000233 0.948542  | 18       |
| ENSGALT0000 \N                      | ENSGALG000000233 0.464758  | 4.18E-25 |
| ENSGALT0000 Uncharacterized protein | ENSGALG000000233 0.734983  | 3.94742  |
| ENSGALT0000 Uncharacterized protein | ENSGALG000000233 0.922584  | 38.5     |
| ENSGALT0000 Uncharacterized protein | ENSGALG000000233 ?         | 0        |
| ENSGALT0000 Uncharacterized protein | ENSGALG000000233 0.945686  | 591.552  |
| ENSGALT0000 Uncharacterized protein | ENSGALG000000233 0.975413  | 117.5    |
| ENSGALT0000 Uncharacterized protein | ENSGALG000000233 0.643597  | 9.63504  |
| ENSGALT0000 Uncharacterized protein | ENSGALG000000233 0.603682  | 0.5      |
| ENSGALT0000 Uncharacterized protein | ENSGALG000000233 0.83849   | 140.5    |
| ENSGALT0000 Uncharacterized protein | ENSGALG000000233 0.903478  | 194.5    |
| ENSGALT0000 Uncharacterized protein | ENSGALG000000233 0.730554  | 3439.54  |
| ENSGALT0000 Uncharacterized protein | ENSGALG000000233 0.910723  | 15.7919  |
| ENSGALT0000 Uncharacterized protein | ENSGALG000000233 ?         | 0        |
| ENSGALT0000 Uncharacterized protein | ENSGALG000000233 ?         | 0        |
| ENSGALT0000 Uncharacterized protein | ENSGALG000000233 0.228215  | 7.28722  |
| ENSGALT0000 Uncharacterized protein | ENSGALG000000233 ?         | 0        |
| ENSGALT0000 Uncharacterized protein | ENSGALG000000233 0.414785  | 2        |
| ENSGALT0000 Uncharacterized protein | ENSGALG000000233 0.965357  | 504.968  |
| ENSGALT0000 Uncharacterized protein | ENSGALG000000233 0.694223  | 415      |
| ENSGALT0000 Uncharacterized protein | ENSGALG000000233 0.715634  | 6.5      |
| ENSGALT0000 Uncharacterized protein | ENSGALG000000233 0.91497   | 5        |
| ENSGALT0000 Uncharacterized protein | ENSGALG000000233 0.970183  | 73.5     |
| ENSGALT0000 Uncharacterized protein | ENSGALG000000233 ?         | 0        |
| ENSGALT0000 Uncharacterized protein | ENSGALG000000233 0.997104  | 62       |
| ENSGALT0000 Uncharacterized protein | ENSGALG000000233 0.853815  | 0.5      |
| ENSGALT0000 Uncharacterized protein | ENSGALG000000233 0.999685  | 589      |
| ENSGALT0000 Uncharacterized protein | ENSGALG000000233 0.933098  | 405.5    |
| ENSGALT0000 Uncharacterized protein | ENSGALG000000233 0.907974  | 162.5    |
| ENSGALT0000 Uncharacterized protein | ENSGALG000000233 ?         | 0        |
| ENSGALT0000 Uncharacterized protein | ENSGALG000000233 0.867641  | 96.5     |
| ENSGALT0000 Uncharacterized protein | ENSGALG000000233 0.872369  | 70.5     |
| ENSGALT0000 Uncharacterized protein | ENSGALG000000233 0.682089  | 5        |
| ENSGALT0000 Uncharacterized protein | ENSGALG000000233 0.876044  | 111      |
| ENSGALT0000 Uncharacterized protein | ENSGALG000000233 0.98442   | 228.024  |
| ENSGALT0000 Uncharacterized protein | ENSGALG000000233 0.966825  | 22.5     |
| ENSGALT0000 Uncharacterized protein | ENSGALG000000233 0.0516364 | 1.15214  |
| ENSGALT0000 Uncharacterized protein | ENSGALG000000233 ?         | 0        |
| ENSGALT0000 Uncharacterized protein | ENSGALG000000233 0.26061   | 0        |
| ENSGALT0000 Uncharacterized protein | ENSGALG000000234 0.916885  | 159.5    |
| ENSGALT0000 Uncharacterized protein | ENSGALG000000234 0.889783  | 23.5     |
| ENSGALT0000 Uncharacterized protein | ENSGALG000000234 0.966656  | 34.5     |
| ENSGALT0000 Uncharacterized protein | ENSGALG000000234 0.782563  | 16.5     |
| ENSGALT0000 Uncharacterized protein | ENSGALG000000234 0.846537  | 64.8566  |
| ENSGALT0000 Uncharacterized protein | ENSGALG000000234 0.464758  | 0        |
| ENSGALT0000 Uncharacterized protein | ENSGALG000000234 0.999456  | 129.45   |
| ENSGALT0000 Uncharacterized protein | ENSGALG000000234 0.918887  | 13       |
| ENSGALT0000 Uncharacterized protein | ENSGALG000000234 ?         | 0        |
| ENSGALT0000 Uncharacterized protein | ENSGALG000000234 0.967073  | 87.9532  |
| ENSGALT0000 Uncharacterized protein | ENSGALG000000234 0.603682  | 0.5      |



|                                     |                           |         |
|-------------------------------------|---------------------------|---------|
| ENSGALT0000 Uncharacterized protein | ENSGALG0000002340.200112  | 2.5     |
| ENSGALT0000 Uncharacterized protein | ENSGALG000000234 ?        | 0       |
| ENSGALT0000 Uncharacterized protein | ENSGALG0000002340.649519  | 0.5     |
| ENSGALT0000 Uncharacterized protein | ENSGALG0000002340.992776  | 323.073 |
| ENSGALT0000 Uncharacterized protein | ENSGALG0000002340.464775  | 0.00011 |
| ENSGALT0000 Uncharacterized protein | ENSGALG0000002340.732429  | 5.6149  |
| ENSGALT0000 Uncharacterized protein | ENSGALG0000002340.542277  | 3.39964 |
| ENSGALT0000 \N                      | ENSGALG0000002340.464758  | 2       |
| ENSGALT0000 Uncharacterized protein | ENSGALG0000002340.120866  | 0.0209  |
| ENSGALT0000 Uncharacterized protein | ENSGALG0000002340.464758  | 0.5     |
| ENSGALT0000 Uncharacterized protein | ENSGALG0000002340.769873  | 6       |
| ENSGALT0000 Uncharacterized protein | ENSGALG0000002340.754848  | 10      |
| ENSGALT0000 Uncharacterized protein | ENSGALG0000002340.905124  | 29      |
| ENSGALT0000 Uncharacterized protein | ENSGALG0000002340.464758  | 0       |
| ENSGALT0000 Uncharacterized protein | ENSGALG0000002340.679555  | 67.5    |
| ENSGALT0000 Uncharacterized protein | ENSGALG0000002340.105096  | 101.369 |
| ENSGALT0000 Uncharacterized protein | ENSGALG0000002340.975388  | 201.303 |
| ENSGALT0000 Uncharacterized protein | ENSGALG0000002340.371997  | 0       |
| ENSGALT0000 Uncharacterized protein | ENSGALG0000002340.901538  | 884     |
| ENSGALT0000 Uncharacterized protein | ENSGALG0000002340.818488  | 1.5     |
| ENSGALT0000 Uncharacterized protein | ENSGALG0000002340.464758  | 0       |
| ENSGALT0000 Uncharacterized protein | ENSGALG0000002340.947237  | 13.3068 |
| ENSGALT0000 Uncharacterized protein | ENSGALG000000234 ?        | 0       |
| ENSGALT0000 Uncharacterized protein | ENSGALG000000234 ?        | 0       |
| ENSGALT0000 Uncharacterized protein | ENSGALG0000002340.719171  | 2.5     |
| ENSGALT0000 Uncharacterized protein | ENSGALG0000002340.876281  | 366.5   |
| ENSGALT0000 Uncharacterized protein | ENSGALG0000002340.864354  | 16.9631 |
| ENSGALT0000 Uncharacterized protein | ENSGALG0000002340.926007  | 665.926 |
| ENSGALT0000 Uncharacterized protein | ENSGALG0000002340.848644  | 729.074 |
| ENSGALT0000 Uncharacterized protein | ENSGALG0000002340.889009  | 4.89032 |
| ENSGALT0000 Uncharacterized protein | ENSGALG0000002340.884145  | 142.11  |
| ENSGALT0000 Uncharacterized protein | ENSGALG0000002340.876583  | 2.5     |
| ENSGALT0000 Uncharacterized protein | ENSGALG0000002340.464758  | 0       |
| ENSGALT0000 Uncharacterized protein | ENSGALG0000002340.591005  | 113.5   |
| ENSGALT0000 Uncharacterized protein | ENSGALG0000002340.645009  | 28.5    |
| ENSGALT0000 Uncharacterized protein | ENSGALG0000002340.371997  | 51      |
| ENSGALT0000 Uncharacterized protein | ENSGALG0000002340.138367  | 60.4848 |
| ENSGALT0000 Uncharacterized protein | ENSGALG0000002340.945725  | 686.166 |
| ENSGALT0000 Uncharacterized protein | ENSGALG0000002340.966859  | 114.5   |
| ENSGALT0000 Uncharacterized protein | ENSGALG0000002340.335729  | 5.5     |
| ENSGALT0000 Uncharacterized protein | ENSGALG0000002340.904935  | 35.8932 |
| ENSGALT0000 Uncharacterized protein | ENSGALG0000002340.0332725 | 0       |
| ENSGALT0000 \N                      | ENSGALG000000234 ?        | 0       |
| ENSGALT0000 Uncharacterized protein | ENSGALG0000002340.255811  | 14.7403 |
| ENSGALT0000 Uncharacterized protein | ENSGALG0000002340.973633  | 144     |
| ENSGALT0000 Uncharacterized protein | ENSGALG0000002340.966452  | 52      |
| ENSGALT0000 Uncharacterized protein | ENSGALG0000002340.989882  | 3.5     |
| ENSGALT0000 Uncharacterized protein | ENSGALG0000002340.898666  | 126.715 |
| ENSGALT0000 Uncharacterized protein | ENSGALG0000002340.888037  | 250.785 |
| ENSGALT0000 Uncharacterized protein | ENSGALG0000002340.901009  | 16.5    |
| ENSGALT0000 Uncharacterized protein | ENSGALG0000002340.991953  | 194.774 |
| ENSGALT0000 Uncharacterized protein | ENSGALG0000002340.931921  | 35.5    |
| ENSGALT0000 Uncharacterized protein | ENSGALG0000002340.905173  | 65.5    |
| ENSGALT0000 Uncharacterized protein | ENSGALG0000002340.956323  | 87      |
| ENSGALT0000 Uncharacterized protein | ENSGALG0000002340.702636  | 408.952 |
| ENSGALT0000 Uncharacterized protein | ENSGALG0000002340.929507  | 47      |

|                                     |                           |          |
|-------------------------------------|---------------------------|----------|
| ENSGALT0000 Uncharacterized protein | ENSGALG000000234 0.934682 | 32.5     |
| ENSGALT0000 Uncharacterized protein | ENSGALG000000234 0.676891 | 111.957  |
| ENSGALT0000 Uncharacterized protein | ENSGALG000000235 0.936336 | 8        |
| ENSGALT0000 Uncharacterized protein | ENSGALG000000235 0.938281 | 111.5    |
| ENSGALT0000 Uncharacterized protein | ENSGALG000000235 0.395661 | 1.17859  |
| ENSGALT0000 Uncharacterized protein | ENSGALG000000235 0.818488 | 1.5      |
| ENSGALT0000 Uncharacterized protein | ENSGALG000000235 0.994276 | 27.5     |
| ENSGALT0000 Uncharacterized protein | ENSGALG000000235 0.941729 | 124.675  |
| ENSGALT0000 Uncharacterized protein | ENSGALG000000235 0.474646 | 3.91865  |
| ENSGALT0000 Uncharacterized protein | ENSGALG000000235 0.924136 | 4.36607  |
| ENSGALT0000 Uncharacterized protein | ENSGALG000000235 0.960238 | 2.34338  |
| ENSGALT0000 Uncharacterized protein | ENSGALG000000235 0.815541 | 45       |
| ENSGALT0000 Uncharacterized protein | ENSGALG000000235 0.971293 | 3        |
| ENSGALT0000 Uncharacterized protein | ENSGALG000000235 0.964863 | 4.72178  |
| ENSGALT0000 Uncharacterized protein | ENSGALG000000235 0.974571 | 18.5     |
| ENSGALT0000 Uncharacterized protein | ENSGALG000000235 0.958025 | 86       |
| ENSGALT0000 Uncharacterized protein | ENSGALG000000235 0.464758 | 6.99E-23 |
| ENSGALT0000 Uncharacterized protein | ENSGALG000000235 0.869506 | 71.9813  |
| ENSGALT0000 Uncharacterized protein | ENSGALG000000235 0.814671 | 75       |
| ENSGALT0000 Uncharacterized protein | ENSGALG000000235 ?        | 0        |
| ENSGALT0000 Uncharacterized protein | ENSGALG000000235 0.562993 | 0        |
| ENSGALT0000 Uncharacterized protein | ENSGALG000000235 0.854258 | 21.5     |
| ENSGALT0000 Uncharacterized protein | ENSGALG000000235 0.934973 | 208.5    |
| ENSGALT0000 Uncharacterized protein | ENSGALG000000235 0.464969 | 1.59E-10 |
| ENSGALT0000 Uncharacterized protein | ENSGALG000000235 0.839585 | 8        |
| ENSGALT0000 Uncharacterized protein | ENSGALG000000235 0.976953 | 13.7126  |
| ENSGALT0000 Uncharacterized protein | ENSGALG000000235 ?        | 0        |
| ENSGALT0000 Uncharacterized protein | ENSGALG000000235 0.681498 | 7.85182  |
| ENSGALT0000 Uncharacterized protein | ENSGALG000000235 0.996237 | 150.543  |
| ENSGALT0000 Uncharacterized protein | ENSGALG000000235 0.950699 | 329.5    |
| ENSGALT0000 Uncharacterized protein | ENSGALG000000235 ?        | 0        |
| ENSGALT0000 Uncharacterized protein | ENSGALG000000235 0.790998 | 4.5      |
| ENSGALT0000 Uncharacterized protein | ENSGALG000000235 0.974738 | 3.5      |
| ENSGALT0000 Uncharacterized protein | ENSGALG000000235 0.990098 | 87       |
| ENSGALT0000 Uncharacterized protein | ENSGALG000000235 0.956302 | 48       |
| ENSGALT0000 Uncharacterized protein | ENSGALG000000235 0.884283 | 610.001  |
| ENSGALT0000 \N                      | ENSGALG000000235 0.464758 | 0        |
| ENSGALT0000 Uncharacterized protein | ENSGALG000000235 0.77822  | 17       |
| ENSGALT0000 Uncharacterized protein | ENSGALG000000235 0.93348  | 139.5    |
| ENSGALT0000 Uncharacterized protein | ENSGALG000000235 0.956186 | 71.5     |
| ENSGALT0000 Uncharacterized protein | ENSGALG000000235 0.768016 | 43       |
| ENSGALT0000 Uncharacterized protein | ENSGALG000000235 0.755327 | 48.208   |
| ENSGALT0000 Uncharacterized protein | ENSGALG000000235 0.978681 | 232      |
| ENSGALT0000 Uncharacterized protein | ENSGALG000000235 ?        | 0        |
| ENSGALT0000 Uncharacterized protein | ENSGALG000000235 0.932999 | 11.5     |
| ENSGALT0000 Uncharacterized protein | ENSGALG000000235 0.996558 | 106.312  |
| ENSGALT0000 Uncharacterized protein | ENSGALG000000235 0.880944 | 162.5    |
| ENSGALT0000 Uncharacterized protein | ENSGALG000000235 0.665697 | 366.531  |
| ENSGALT0000 Uncharacterized protein | ENSGALG000000235 0.970912 | 95.5     |
| ENSGALT0000 Uncharacterized protein | ENSGALG000000235 0.46476  | 6.27E-07 |
| ENSGALT0000 Uncharacterized protein | ENSGALG000000235 0.876667 | 20.4053  |
| ENSGALT0000 Uncharacterized protein | ENSGALG000000235 0.807471 | 24       |
| ENSGALT0000 Uncharacterized protein | ENSGALG000000235 0.471446 | 1.42942  |
| ENSGALT0000 Uncharacterized protein | ENSGALG000000235 0.602328 | 52.9481  |
| ENSGALT0000 Uncharacterized protein | ENSGALG000000235 0.977075 | 82       |
| ENSGALT0000 Uncharacterized protein | ENSGALG000000235 0.571893 | 335.277  |

|                                     |                           |         |
|-------------------------------------|---------------------------|---------|
| ENSGALT0000 Uncharacterized protein | ENSGALG000000235 0.500968 | 49.193  |
| ENSGALT0000 Uncharacterized protein | ENSGALG000000235 0.892504 | 771     |
| ENSGALT0000 Uncharacterized protein | ENSGALG000000235 0.95622  | 432.248 |
| ENSGALT0000 Uncharacterized protein | ENSGALG000000235 0.649519 | 0       |
| ENSGALT0000 Uncharacterized protein | ENSGALG000000235 0.810291 | 3.85303 |
| ENSGALT0000 Uncharacterized protein | ENSGALG000000235 ?        | 0       |
| ENSGALT0000 Uncharacterized protein | ENSGALG000000235 0.589261 | 12.5    |
| ENSGALT0000 Uncharacterized protein | ENSGALG000000235 0.930348 | 20.5    |
| ENSGALT0000 Uncharacterized protein | ENSGALG000000235 0.179851 | 49.5    |
| ENSGALT0000 Uncharacterized protein | ENSGALG000000235 0.362824 | 24.7646 |
| ENSGALT0000 \N                      | ENSGALG000000235 0.19245  | 0       |
| ENSGALT0000 \N                      | ENSGALG000000235 0.662104 | 0.25    |
| ENSGALT0000 Uncharacterized protein | ENSGALG000000235 0.755221 | 6.5     |
| ENSGALT0000 Uncharacterized protein | ENSGALG000000235 0.859345 | 15.7819 |
| ENSGALT0000 Uncharacterized protein | ENSGALG000000235 0.361744 | 2.5     |
| ENSGALT0000 Uncharacterized protein | ENSGALG000000235 0.824805 | 7       |
| ENSGALT0000 Uncharacterized protein | ENSGALG000000235 0.643623 | 1       |
| ENSGALT0000 Uncharacterized protein | ENSGALG000000235 0.994379 | 261.929 |
| ENSGALT0000 Uncharacterized protein | ENSGALG000000235 0.944634 | 648.5   |
| ENSGALT0000 Uncharacterized protein | ENSGALG000000236 0.882688 | 6.46999 |
| ENSGALT0000 Uncharacterized protein | ENSGALG000000236 0.766207 | 7       |
| ENSGALT0000 Uncharacterized protein | ENSGALG000000236 ?        | 0       |
| ENSGALT0000 Uncharacterized protein | ENSGALG000000236 0.156662 | 1.09546 |
| ENSGALT0000 Uncharacterized protein | ENSGALG000000236 0.566329 | 195.878 |
| ENSGALT0000 Uncharacterized protein | ENSGALG000000236 0.756654 | 15.5    |
| ENSGALT0000 Uncharacterized protein | ENSGALG000000236 0.91344  | 64.4512 |
| ENSGALT0000 Uncharacterized protein | ENSGALG000000236 0.975462 | 162     |
| ENSGALT0000 Uncharacterized protein | ENSGALG000000236 0.576865 | 5.83561 |
| ENSGALT0000 Uncharacterized protein | ENSGALG000000236 0.922714 | 505.5   |
| ENSGALT0000 Uncharacterized protein | ENSGALG000000236 0.835486 | 3.75796 |
| ENSGALT0000 Uncharacterized protein | ENSGALG000000236 0.904804 | 1.5     |
| ENSGALT0000 Uncharacterized protein | ENSGALG000000236 0.966286 | 37.5    |
| ENSGALT0000 Uncharacterized protein | ENSGALG000000236 0.913912 | 88      |
| ENSGALT0000 Uncharacterized protein | ENSGALG000000236 0.465261 | 15.8144 |
| ENSGALT0000 Uncharacterized protein | ENSGALG000000236 ?        | 0       |
| ENSGALT0000 Uncharacterized protein | ENSGALG000000236 0.874892 | 111.257 |
| ENSGALT0000 Uncharacterized protein | ENSGALG000000236 0.667188 | 339     |
| ENSGALT0000 Uncharacterized protein | ENSGALG000000236 0.947547 | 170.5   |
| ENSGALT0000 Uncharacterized protein | ENSGALG000000236 1        | 0.5     |
| ENSGALT0000 Uncharacterized protein | ENSGALG000000236 ?        | 0       |
| ENSGALT0000 Uncharacterized protein | ENSGALG000000236 0.930119 | 305.135 |
| ENSGALT0000 Uncharacterized protein | ENSGALG000000236 0.943757 | 169.5   |
| ENSGALT0000 Uncharacterized protein | ENSGALG000000236 0.902947 | 686.5   |
| ENSGALT0000 Uncharacterized protein | ENSGALG000000236 0.962334 | 11      |
| ENSGALT0000 Uncharacterized protein | ENSGALG000000236 0.982211 | 241     |
| ENSGALT0000 Uncharacterized protein | ENSGALG000000236 0.581099 | 17.5    |
| ENSGALT0000 Uncharacterized protein | ENSGALG000000236 0.811874 | 69.5    |
| ENSGALT0000 Uncharacterized protein | ENSGALG000000236 0.464758 | 0       |
| ENSGALT0000 Uncharacterized protein | ENSGALG000000236 0.989457 | 625.085 |
| ENSGALT0000 Uncharacterized protein | ENSGALG000000236 0.911272 | 28.4237 |
| ENSGALT0000 Uncharacterized protein | ENSGALG000000236 0.956833 | 27      |
| ENSGALT0000 Uncharacterized protein | ENSGALG000000236 ?        | 0       |
| ENSGALT0000 Uncharacterized protein | ENSGALG000000236 0.852184 | 6.5     |
| ENSGALT0000 Uncharacterized protein | ENSGALG000000236 0.932638 | 9.77682 |
| ENSGALT0000 Uncharacterized protein | ENSGALG000000236 0.783517 | 21.5    |
| ENSGALT0000 Uncharacterized protein | ENSGALG000000236 0.991296 | 1795    |

|                                     |                            |         |
|-------------------------------------|----------------------------|---------|
| ENSGALT0000 Uncharacterized protein | ENSGALG000000236 0.533174  | 27      |
| ENSGALT0000 Uncharacterized protein | ENSGALG000000236 0.997251  | 12.5411 |
| ENSGALT0000 Uncharacterized protein | ENSGALG000000236 0.690297  | 1.38103 |
| ENSGALT0000 Uncharacterized protein | ENSGALG000000236 0.993334  | 889.5   |
| ENSGALT0000 Uncharacterized protein | ENSGALG000000236 0.947346  | 484     |
| ENSGALT0000 Uncharacterized protein | ENSGALG000000236 0.970902  | 18      |
| ENSGALT0000 \N                      | ENSGALG000000236 ?         | 0       |
| ENSGALT0000 Uncharacterized protein | ENSGALG000000236 0.541183  | 0       |
| ENSGALT0000 Uncharacterized protein | ENSGALG000000236 0.989406  | 109.5   |
| ENSGALT0000 Uncharacterized protein | ENSGALG000000236 0.539038  | 0       |
| ENSGALT0000 Uncharacterized protein | ENSGALG000000236 0.960106  | 7.42518 |
| ENSGALT0000 Uncharacterized protein | ENSGALG000000236 0.914531  | 1182.68 |
| ENSGALT0000 Uncharacterized protein | ENSGALG000000236 0.814341  | 11      |
| ENSGALT0000 Uncharacterized protein | ENSGALG000000236 0.972997  | 398     |
| ENSGALT0000 Uncharacterized protein | ENSGALG000000236 0.981124  | 1787    |
| ENSGALT0000 \N                      | ENSGALG000000236 0.464758  | 0       |
| ENSGALT0000 Uncharacterized protein | ENSGALG000000236 0.0703388 | 0.57037 |
| ENSGALT0000 Uncharacterized protein | ENSGALG000000236 0.969633  | 36.5    |
| ENSGALT0000 Uncharacterized protein | ENSGALG000000236 ?         | 0       |
| ENSGALT0000 Uncharacterized protein | ENSGALG000000236 0.938986  | 21      |
| ENSGALT0000 Uncharacterized protein | ENSGALG000000236 0.886232  | 101.701 |
| ENSGALT0000 Uncharacterized protein | ENSGALG000000236 0.956359  | 43      |
| ENSGALT0000 Uncharacterized protein | ENSGALG000000236 0.948932  | 37.5    |
| ENSGALT0000 Uncharacterized protein | ENSGALG000000236 0.957601  | 9.5     |
| ENSGALT0000 Uncharacterized protein | ENSGALG000000236 0.939579  | 3.5     |
| ENSGALT0000 Uncharacterized protein | ENSGALG000000236 0.81558   | 249.856 |
| ENSGALT0000 Uncharacterized protein | ENSGALG000000236 0.631223  | 0       |
| ENSGALT0000 Uncharacterized protein | ENSGALG000000236 0.464758  | 0       |
| ENSGALT0000 Uncharacterized protein | ENSGALG000000237 0.929182  | 22.5    |
| ENSGALT0000 Uncharacterized protein | ENSGALG000000237 0.965055  | 231     |
| ENSGALT0000 Uncharacterized protein | ENSGALG000000237 0.936325  | 399     |
| ENSGALT0000 \N                      | ENSGALG000000237 0.804541  | 404.5   |
| ENSGALT0000 Uncharacterized protein | ENSGALG000000237 0.905724  | 6.5     |
| ENSGALT0000 Uncharacterized protein | ENSGALG000000237 0.603682  | 0.5     |
| ENSGALT0000 \N                      | ENSGALG000000237 ?         | 0       |
| ENSGALT0000 \N                      | ENSGALG000000237 0.464758  | 0       |
| ENSGALT0000 Uncharacterized protein | ENSGALG000000237 0.77435   | 11.5    |
| ENSGALT0000 Uncharacterized protein | ENSGALG000000237 ?         | 0       |
| ENSGALT0000 Uncharacterized protein | ENSGALG000000237 0.985321  | 33.0323 |
| ENSGALT0000 Uncharacterized protein | ENSGALG000000237 0.964217  | 89.792  |
| ENSGALT0000 Uncharacterized protein | ENSGALG000000237 0.797043  | 18.5    |
| ENSGALT0000 Uncharacterized protein | ENSGALG000000237 0.462855  | 7.5     |
| ENSGALT0000 Uncharacterized protein | ENSGALG000000237 0.57122   | 0.46288 |
| ENSGALT0000 Uncharacterized protein | ENSGALG000000237 0.889498  | 21      |
| ENSGALT0000 Uncharacterized protein | ENSGALG000000237 0.524047  | 0.5     |
| ENSGALT0000 Uncharacterized protein | ENSGALG000000237 0.711766  | 1.5     |
| ENSGALT0000 Uncharacterized protein | ENSGALG000000237 0.778034  | 159.625 |
| ENSGALT0000 Uncharacterized protein | ENSGALG000000237 0.891578  | 3       |
| ENSGALT0000 Uncharacterized protein | ENSGALG000000237 0.768188  | 73.5779 |
| ENSGALT0000 Uncharacterized protein | ENSGALG000000237 0.922727  | 41.781  |
| ENSGALT0000 Uncharacterized protein | ENSGALG000000237 0.942113  | 354.712 |
| ENSGALT0000 Uncharacterized protein | ENSGALG000000237 0.965406  | 31      |
| ENSGALT0000 Uncharacterized protein | ENSGALG000000237 0.968912  | 491.5   |
| ENSGALT0000 Uncharacterized protein | ENSGALG000000237 0.732673  | 23.5    |
| ENSGALT0000 Uncharacterized protein | ENSGALG000000237 0.464758  | 0.30203 |
| ENSGALT0000 Uncharacterized protein | ENSGALG000000237 ?         | 0       |

|                                     |                          |         |
|-------------------------------------|--------------------------|---------|
| ENSGALT0000 Uncharacterized protein | ENSGALG0000002370.990524 | 373     |
| ENSGALT0000 Uncharacterized protein | ENSGALG0000002370.627697 | 3.64704 |
| ENSGALT0000 Uncharacterized protein | ENSGALG0000002370.923464 | 325.398 |
| ENSGALT0000 Uncharacterized protein | ENSGALG0000002370.87799  | 818     |
| ENSGALT0000 Uncharacterized protein | ENSGALG0000002370.96368  | 50.5    |
| ENSGALT0000 Uncharacterized protein | ENSGALG0000002370.994655 | 92      |
| ENSGALT0000 Uncharacterized protein | ENSGALG0000002370.861459 | 105     |
| ENSGALT0000 Uncharacterized protein | ENSGALG0000002370.988231 | 416     |
| ENSGALT0000 Uncharacterized protein | ENSGALG0000002370.982662 | 339.5   |
| ENSGALT0000 Uncharacterized protein | ENSGALG0000002370.97819  | 501.5   |
| ENSGALT0000 Uncharacterized protein | ENSGALG000000237?        | 0       |
| ENSGALT0000 Uncharacterized protein | ENSGALG0000002370.603171 | 32.3612 |
| ENSGALT0000 Uncharacterized protein | ENSGALG0000002370.978918 | 356.5   |
| ENSGALT0000 Uncharacterized protein | ENSGALG000000237?        | 0       |
| ENSGALT0000 Uncharacterized protein | ENSGALG000000237?        | 0       |
| ENSGALT0000 Uncharacterized protein | ENSGALG0000002370.901874 | 74.5    |
| ENSGALT0000 Uncharacterized protein | ENSGALG0000002370.603682 | 0       |
| ENSGALT0000 Uncharacterized protein | ENSGALG0000002370.963015 | 463     |
| ENSGALT0000 Uncharacterized protein | ENSGALG0000002370.695591 | 16.5008 |
| ENSGALT0000 Uncharacterized protein | ENSGALG0000002370.793281 | 184.554 |
| ENSGALT0000 Uncharacterized protein | ENSGALG0000002370.603682 | 0       |
| ENSGALT0000 Uncharacterized protein | ENSGALG0000002370.98947  | 209     |
| ENSGALT0000 Uncharacterized protein | ENSGALG0000002370.738039 | 10.8175 |
| ENSGALT0000 Uncharacterized protein | ENSGALG0000002370.969627 | 202.5   |
| ENSGALT0000 Uncharacterized protein | ENSGALG0000002370.976676 | 109.059 |
| ENSGALT0000 Uncharacterized protein | ENSGALG000000237?        | 0       |
| ENSGALT0000 Uncharacterized protein | ENSGALG000000237?        | 0       |
| ENSGALT0000 Uncharacterized protein | ENSGALG0000002370.19245  | 0       |
| ENSGALT0000 \N                      | ENSGALG0000002370.464758 | 0       |
| ENSGALT0000 Uncharacterized protein | ENSGALG0000002370.603682 | 0       |
| ENSGALT0000 Uncharacterized protein | ENSGALG0000002370.70462  | 6       |
| ENSGALT0000 \N                      | ENSGALG0000002370.841488 | 140     |
| ENSGALT0000 Uncharacterized protein | ENSGALG0000002370.619959 | 2.30451 |
| ENSGALT0000 Uncharacterized protein | ENSGALG0000002370.802996 | 8.5     |
| ENSGALT0000 Uncharacterized protein | ENSGALG0000002370.464758 | 4       |
| ENSGALT0000 Uncharacterized protein | ENSGALG0000002370.13619  | 0.5     |
| ENSGALT0000 Uncharacterized protein | ENSGALG0000002370.528378 | 9.31838 |
| ENSGALT0000 Uncharacterized protein | ENSGALG0000002370.904007 | 56      |
| ENSGALT0000 Uncharacterized protein | ENSGALG0000002370.630746 | 332.211 |
| ENSGALT0000 Uncharacterized protein | ENSGALG0000002370.949669 | 694.337 |
| ENSGALT0000 Uncharacterized protein | ENSGALG0000002370.9592   | 518.5   |
| ENSGALT0000 Uncharacterized protein | ENSGALG0000002370.994006 | 359.5   |
| ENSGALT0000 Uncharacterized protein | ENSGALG0000002370.955724 | 15.5    |
| ENSGALT0000 Uncharacterized protein | ENSGALG0000002370.963224 | 86      |
| ENSGALT0000 Uncharacterized protein | ENSGALG0000002380.953966 | 48.4668 |
| ENSGALT0000 Uncharacterized protein | ENSGALG0000002380.9139   | 81.6024 |
| ENSGALT0000 Uncharacterized protein | ENSGALG0000002380.878631 | 6       |
| ENSGALT0000 Uncharacterized protein | ENSGALG0000002380.872946 | 554     |
| ENSGALT0000 Uncharacterized protein | ENSGALG0000002380.828753 | 7.5     |
| ENSGALT0000 Uncharacterized protein | ENSGALG0000002380.931727 | 168     |
| ENSGALT0000 Uncharacterized protein | ENSGALG0000002380.925773 | 381     |
| ENSGALT0000 Uncharacterized protein | ENSGALG0000002380.979153 | 20.5    |
| ENSGALT0000 Uncharacterized protein | ENSGALG0000002380.910903 | 274.838 |
| ENSGALT0000 Uncharacterized protein | ENSGALG0000002380.411164 | 1.42033 |
| ENSGALT0000 Uncharacterized protein | ENSGALG0000002380.937772 | 88      |
| ENSGALT0000 Uncharacterized protein | ENSGALG0000002380.966018 | 734.297 |

|                                     |                           |         |
|-------------------------------------|---------------------------|---------|
| ENSGALT0000 Uncharacterized protein | ENSGALG00000023E 0.700077 | 8.58748 |
| ENSGALT0000 Uncharacterized protein | ENSGALG00000023E 0.512539 | 79.4147 |
| ENSGALT0000 \N                      | ENSGALG00000023E 0.736459 | 97.2725 |
| ENSGALT0000 Uncharacterized protein | ENSGALG00000023E 0.147219 | 2       |
| ENSGALT0000 Uncharacterized protein | ENSGALG00000023E 0.873315 | 420.598 |
| ENSGALT0000 Uncharacterized protein | ENSGALG00000023E 0.92075  | 161.141 |
| ENSGALT0000 Uncharacterized protein | ENSGALG00000023E 0.789569 | 16      |
| ENSGALT0000 Uncharacterized protein | ENSGALG00000023E 0.958994 | 406.261 |
| ENSGALT0000 Uncharacterized protein | ENSGALG00000023E 0.977247 | 11      |
| ENSGALT0000 Uncharacterized protein | ENSGALG00000023E 0.998437 | 131.5   |
| ENSGALT0000 Uncharacterized protein | ENSGALG00000023E 0.914109 | 47.9793 |
| ENSGALT0000 Uncharacterized protein | ENSGALG00000023E 0.470391 | 16      |
| ENSGALT0000 Uncharacterized protein | ENSGALG00000023E 0.873126 | 308.145 |
| ENSGALT0000 Uncharacterized protein | ENSGALG00000023E 0.967193 | 231.455 |
| ENSGALT0000 Uncharacterized protein | ENSGALG00000023E 0.920642 | 35.5196 |
| ENSGALT0000 Uncharacterized protein | ENSGALG00000023E 0.603682 | 0       |
| ENSGALT0000 Uncharacterized protein | ENSGALG00000023E 0.975267 | 461.5   |
| ENSGALT0000 Uncharacterized protein | ENSGALG00000023E ?        | 0       |
| ENSGALT0000 Uncharacterized protein | ENSGALG00000023E 0.603682 | 1       |
| ENSGALT0000 Uncharacterized protein | ENSGALG00000023E 0.996069 | 315.5   |
| ENSGALT0000 Uncharacterized protein | ENSGALG00000023E 0.465915 | 20.5    |
| ENSGALT0000 Uncharacterized protein | ENSGALG00000023E 0.727172 | 2069    |
| ENSGALT0000 Uncharacterized protein | ENSGALG00000023E 0.903132 | 62.5    |
| ENSGALT0000 Uncharacterized protein | ENSGALG00000023E 0.937854 | 14.2732 |
| ENSGALT0000 Uncharacterized protein | ENSGALG00000023E 0.620731 | 5       |
| ENSGALT0000 Uncharacterized protein | ENSGALG00000023E 0.504782 | 16.5488 |
| ENSGALT0000 Uncharacterized protein | ENSGALG00000023E 0.87647  | 326.5   |
| ENSGALT0000 Uncharacterized protein | ENSGALG00000023E 0.534331 | 14      |
| ENSGALT0000 Uncharacterized protein | ENSGALG00000023E 0.8397   | 70.8649 |
| ENSGALT0000 Uncharacterized protein | ENSGALG00000023E 0.844634 | 97.635  |
| ENSGALT0000 Uncharacterized protein | ENSGALG00000023E 0.562993 | 1.5     |
| ENSGALT0000 Uncharacterized protein | ENSGALG00000023E 0.978819 | 9.80401 |
| ENSGALT0000 Uncharacterized protein | ENSGALG00000023E ?        | 0       |
| ENSGALT0000 Uncharacterized protein | ENSGALG00000023E 0.298331 | 0.69007 |
| ENSGALT0000 Uncharacterized protein | ENSGALG00000023E ?        | 0       |
| ENSGALT0000 Uncharacterized protein | ENSGALG00000023E 0.995188 | 7.5     |
| ENSGALT0000 Uncharacterized protein | ENSGALG00000023E 0.907853 | 298     |
| ENSGALT0000 Uncharacterized protein | ENSGALG00000023E 0.882132 | 2.95466 |
| ENSGALT0000 Uncharacterized protein | ENSGALG00000023E 0.711353 | 4       |
| ENSGALT0000 Uncharacterized protein | ENSGALG00000023E 0.991392 | 6       |
| ENSGALT0000 Uncharacterized protein | ENSGALG00000023E 0.984171 | 73      |
| ENSGALT0000 Uncharacterized protein | ENSGALG00000023E 0.698922 | 27.5187 |
| ENSGALT0000 \N                      | ENSGALG00000023E 0.603682 | 0       |
| ENSGALT0000 Uncharacterized protein | ENSGALG00000023E 0.503868 | 1.56176 |
| ENSGALT0000 \N                      | ENSGALG00000023E 0.464758 | 0       |
| ENSGALT0000 \N                      | ENSGALG00000023E 0.603682 | 0       |
| ENSGALT0000 \N                      | ENSGALG00000023E 0.603682 | 0       |
| ENSGALT0000 \N                      | ENSGALG00000023E 0.464758 | 0       |
| ENSGALT0000 \N                      | ENSGALG00000023E 0.464758 | 0       |
| ENSGALT0000 \N                      | ENSGALG00000023E 0.603682 | 0       |
| ENSGALT0000 \N                      | ENSGALG00000023E 0.603682 | 0       |
| ENSGALT0000 \N                      | ENSGALG00000023E 0.603682 | 0       |
| ENSGALT0000 \N                      | ENSGALG00000023E 0.603682 | 0       |
| ENSGALT0000 \N                      | ENSGALG00000023E 0.603682 | 0       |
| ENSGALT0000 Uncharacterized protein | ENSGALG00000023E 0.666851 | 19      |
| ENSGALT0000 Uncharacterized protein | ENSGALG00000023E 0.972639 | 11.5    |

|                                     |                           |          |
|-------------------------------------|---------------------------|----------|
| ENSGALT0000 \N                      | ENSGALG000000239 1        | 2        |
| ENSGALT0000 Uncharacterized protein | ENSGALG000000239 ?        | 0        |
| ENSGALT0000 Uncharacterized protein | ENSGALG000000239 0.887828 | 456.069  |
| ENSGALT0000 Uncharacterized protein | ENSGALG000000239 0.643632 | 9.5      |
| ENSGALT0000 Uncharacterized protein | ENSGALG000000239 0.938297 | 11.5     |
| ENSGALT0000 Uncharacterized protein | ENSGALG000000239 ?        | 0        |
| ENSGALT0000 Uncharacterized protein | ENSGALG000000239 0.99756  | 6        |
| ENSGALT0000 Uncharacterized protein | ENSGALG000000239 0.621882 | 0        |
| ENSGALT0000 Uncharacterized protein | ENSGALG000000239 0.951265 | 81.773   |
| ENSGALT0000 Uncharacterized protein | ENSGALG000000239 0.85212  | 26.5873  |
| ENSGALT0000 Uncharacterized protein | ENSGALG000000239 0.464758 | 0        |
| ENSGALT0000 Uncharacterized protein | ENSGALG000000239 0.788133 | 2.6356   |
| ENSGALT0000 Uncharacterized protein | ENSGALG000000239 0.963851 | 56       |
| ENSGALT0000 Uncharacterized protein | ENSGALG000000239 0.649519 | 1        |
| ENSGALT0000 Uncharacterized protein | ENSGALG000000239 0.723962 | 4        |
| ENSGALT0000 Uncharacterized protein | ENSGALG000000239 0.874296 | 82.5     |
| ENSGALT0000 Uncharacterized protein | ENSGALG000000239 ?        | 0        |
| ENSGALT0000 Uncharacterized protein | ENSGALG000000239 0.968898 | 1444     |
| ENSGALT0000 Uncharacterized protein | ENSGALG000000239 0.464758 | 0        |
| ENSGALT0000 Uncharacterized protein | ENSGALG000000239 0.983049 | 133.531  |
| ENSGALT0000 Uncharacterized protein | ENSGALG000000239 0.867521 | 104.5    |
| ENSGALT0000 Uncharacterized protein | ENSGALG000000239 0.975848 | 31.0207  |
| ENSGALT0000 Uncharacterized protein | ENSGALG000000239 0.997236 | 289.5    |
| ENSGALT0000 Uncharacterized protein | ENSGALG000000239 0.818488 | 0.5      |
| ENSGALT0000 Uncharacterized protein | ENSGALG000000239 0.99116  | 99.5     |
| ENSGALT0000 Uncharacterized protein | ENSGALG000000239 0.860036 | 24       |
| ENSGALT0000 Uncharacterized protein | ENSGALG000000239 0.959224 | 22       |
| ENSGALT0000 Uncharacterized protein | ENSGALG000000239 0.99509  | 22       |
| ENSGALT0000 Uncharacterized protein | ENSGALG000000239 0.958977 | 458.5    |
| ENSGALT0000 Uncharacterized protein | ENSGALG000000239 ?        | 0        |
| ENSGALT0000 Uncharacterized protein | ENSGALG000000239 0.921571 | 20.4443  |
| ENSGALT0000 Uncharacterized protein | ENSGALG000000239 0.802688 | 20.5     |
| ENSGALT0000 Uncharacterized protein | ENSGALG000000239 0.995851 | 191.5    |
| ENSGALT0000 Uncharacterized protein | ENSGALG000000239 0.99383  | 133.5    |
| ENSGALT0000 Uncharacterized protein | ENSGALG000000239 0.945229 | 171.5    |
| ENSGALT0000 Uncharacterized protein | ENSGALG000000239 0.464758 | 0        |
| ENSGALT0000 Uncharacterized protein | ENSGALG000000239 0.734363 | 3.5      |
| ENSGALT0000 Uncharacterized protein | ENSGALG000000239 0.617505 | 3.59495  |
| ENSGALT0000 Uncharacterized protein | ENSGALG000000239 0.963286 | 261.5    |
| ENSGALT0000 Uncharacterized protein | ENSGALG000000239 0.831403 | 7.33874  |
| ENSGALT0000 Uncharacterized protein | ENSGALG000000239 0.9765   | 413.5    |
| ENSGALT0000 Uncharacterized protein | ENSGALG000000239 0.464758 | 0.5      |
| ENSGALT0000 \N                      | ENSGALG000000239 0.113401 | 9.68E-19 |
| ENSGALT0000 \N                      | ENSGALG000000239 0.464758 | 3.43836  |
| ENSGALT0000 \N                      | ENSGALG000000239 0.464758 | 0.00028  |
| ENSGALT0000 \N                      | ENSGALG000000239 0.464758 | 0.22573  |
| ENSGALT0000 Uncharacterized protein | ENSGALG000000239 0.969657 | 150.5    |
| ENSGALT0000 \N                      | ENSGALG000000239 ?        | 0        |
| ENSGALT0000 \N                      | ENSGALG000000239 ?        | 1.46E-31 |
| ENSGALT0000 \N                      | ENSGALG000000239 0.464758 | 4.98E-19 |
| ENSGALT0000 Uncharacterized protein | ENSGALG000000239 0.464758 | 0        |
| ENSGALT0000 Uncharacterized protein | ENSGALG000000239 0.692879 | 6.5      |
| ENSGALT0000 Uncharacterized protein | ENSGALG000000239 ?        | 2.59E-14 |
| ENSGALT0000 Uncharacterized protein | ENSGALG000000239 0.948416 | 218.898  |
| ENSGALT0000 Uncharacterized protein | ENSGALG000000239 0.958622 | 82.9418  |
| ENSGALT0000 \N                      | ENSGALG000000239 0.11822  | 0.08333  |

|                                     |                           |         |
|-------------------------------------|---------------------------|---------|
| ENSGALT0000 Uncharacterized protein | ENSGALG00000023E 0.851125 | 51.6664 |
| ENSGALT0000 Uncharacterized protein | ENSGALG00000023E 0.440513 | 2       |
| ENSGALT0000 Uncharacterized protein | ENSGALG00000023E ?        | 0       |
| ENSGALT0000 Uncharacterized protein | ENSGALG00000023E 0.719617 | 12.5628 |
| ENSGALT0000 Uncharacterized protein | ENSGALG00000023E 0.977349 | 155.5   |
| ENSGALT0000 Uncharacterized protein | ENSGALG00000023E 0.927235 | 100.5   |
| ENSGALT0000 Uncharacterized protein | ENSGALG00000023E 0.999849 | 178.243 |
| ENSGALT0000 Uncharacterized protein | ENSGALG00000023E 0.983991 | 323.5   |
| ENSGALT0000 Uncharacterized protein | ENSGALG00000023E 0.615036 | 1       |
| ENSGALT0000 Uncharacterized protein | ENSGALG00000023E 0.9943   | 360     |
| ENSGALT0000 Uncharacterized protein | ENSGALG00000023E 0.570147 | 33      |
| ENSGALT0000 Uncharacterized protein | ENSGALG00000023E 0.795041 | 2.5     |
| ENSGALT0000 Uncharacterized protein | ENSGALG00000023E 0.986077 | 84.5    |
| ENSGALT0000 Uncharacterized protein | ENSGALG00000023E 0.872352 | 325     |
| ENSGALT0000 Uncharacterized protein | ENSGALG00000023E 0.962055 | 760.267 |
| ENSGALT0000 Uncharacterized protein | ENSGALG00000023E 0.659932 | 14.5    |
| ENSGALT0000 Uncharacterized protein | ENSGALG00000023E 0.979595 | 75.5    |
| ENSGALT0000 Uncharacterized protein | ENSGALG00000024C 0.845181 | 146.238 |
| ENSGALT0000 Uncharacterized protein | ENSGALG00000024C 0.770474 | 3.5     |
| ENSGALT0000 Uncharacterized protein | ENSGALG00000024C 0.935827 | 369     |
| ENSGALT0000 Uncharacterized protein | ENSGALG00000024C 0.840509 | 1       |
| ENSGALT0000 Uncharacterized protein | ENSGALG00000024C 0.886959 | 133.899 |
| ENSGALT0000 Uncharacterized protein | ENSGALG00000024C 0.983333 | 23.9296 |
| ENSGALT0000 Uncharacterized protein | ENSGALG00000024C 0.862297 | 14.5    |
| ENSGALT0000 Uncharacterized protein | ENSGALG00000024C 0.164103 | 501     |
| ENSGALT0000 Uncharacterized protein | ENSGALG00000024C 0.512931 | 10.3685 |
| ENSGALT0000 Uncharacterized protein | ENSGALG00000024C 0.722096 | 0.5     |
| ENSGALT0000 Uncharacterized protein | ENSGALG00000024C 0.974094 | 64      |
| ENSGALT0000 Uncharacterized protein | ENSGALG00000024C 0.894631 | 339.824 |
| ENSGALT0000 \N                      | ENSGALG00000024C 0.966702 | 93.8883 |
| ENSGALT0000 Uncharacterized protein | ENSGALG00000024C 0.446169 | 2       |
| ENSGALT0000 \N                      | ENSGALG00000024C 0.336979 | 500.356 |
| ENSGALT0000 \N                      | ENSGALG00000024C 0.527111 | 11.4136 |
| ENSGALT0000 Uncharacterized protein | ENSGALG00000024C 0.786806 | 1.5     |
| ENSGALT0000 Uncharacterized protein | ENSGALG00000024C 0.776672 | 13      |
| ENSGALT0000 Uncharacterized protein | ENSGALG00000024C 0.50923  | 1.02774 |
| ENSGALT0000 Uncharacterized protein | ENSGALG00000024C 0.963983 | 129.5   |
| ENSGALT0000 Uncharacterized protein | ENSGALG00000024C 0.992351 | 9.21179 |
| ENSGALT0000 Uncharacterized protein | ENSGALG00000024C 0.993105 | 366.656 |
| ENSGALT0000 Uncharacterized protein | ENSGALG00000024C 0.465506 | 0.00014 |
| ENSGALT0000 Uncharacterized protein | ENSGALG00000024C 0.996452 | 5       |
| ENSGALT0000 Uncharacterized protein | ENSGALG00000024C 0.623799 | 17      |
| ENSGALT0000 Uncharacterized protein | ENSGALG00000024C 0.964239 | 30.5    |
| ENSGALT0000 Uncharacterized protein | ENSGALG00000024C 0.961468 | 410     |
| ENSGALT0000 Uncharacterized protein | ENSGALG00000024C 0.853815 | 1       |
| ENSGALT0000 Uncharacterized protein | ENSGALG00000024C 0.865763 | 1108.5  |
| ENSGALT0000 Uncharacterized protein | ENSGALG00000024C 0.887582 | 699     |
| ENSGALT0000 Uncharacterized protein | ENSGALG00000024C 0.976311 | 79.9523 |
| ENSGALT0000 Uncharacterized protein | ENSGALG00000024C 0.828826 | 1       |
| ENSGALT0000 Uncharacterized protein | ENSGALG00000024C 0.828542 | 14.1053 |
| ENSGALT0000 Uncharacterized protein | ENSGALG00000024C 0.562993 | 0.5     |
| ENSGALT0000 \N                      | ENSGALG00000024C 0.904804 | 1.5     |
| ENSGALT0000 Uncharacterized protein | ENSGALG00000024C 0.73769  | 58      |
| ENSGALT0000 \N                      | ENSGALG00000024C 0.770639 | 81.3353 |
| ENSGALT0000 Uncharacterized protein | ENSGALG00000024C 0.795067 | 7.5     |
| ENSGALT0000 \N                      | ENSGALG00000024C 0.970694 | 555     |



|                                     |                           |          |
|-------------------------------------|---------------------------|----------|
| ENSGALT0000 Uncharacterized protein | ENSGALG00000024C 0.722096 | 0.5      |
| ENSGALT0000 Uncharacterized protein | ENSGALG00000024C 0.934976 | 668.5    |
| ENSGALT0000 Uncharacterized protein | ENSGALG00000024C 0.861519 | 12.5     |
| ENSGALT0000 Uncharacterized protein | ENSGALG00000024C 0.877918 | 249.536  |
| ENSGALT0000 \N                      | ENSGALG00000024C 0.440663 | 38.0065  |
| ENSGALT0000 Uncharacterized protein | ENSGALG00000024C 0.877566 | 3.53581  |
| ENSGALT0000 Uncharacterized protein | ENSGALG00000024C ?        | 0        |
| ENSGALT0000 Uncharacterized protein | ENSGALG00000024C 0.953375 | 894.5    |
| ENSGALT0000 Uncharacterized protein | ENSGALG00000024C 0.929683 | 5        |
| ENSGALT0000 Uncharacterized protein | ENSGALG00000024C 0.464758 | 0        |
| ENSGALT0000 Uncharacterized protein | ENSGALG00000024C 1        | 0.5      |
| ENSGALT0000 Uncharacterized protein | ENSGALG00000024C 0.991108 | 108.826  |
| ENSGALT0000 Uncharacterized protein | ENSGALG00000024C 0.649519 | 0.5      |
| ENSGALT0000 Uncharacterized protein | ENSGALG00000024C 0.939875 | 14.5     |
| ENSGALT0000 Uncharacterized protein | ENSGALG00000024C 0.94747  | 48.5     |
| ENSGALT0000 \N                      | ENSGALG00000024C 0.99623  | 152.16   |
| ENSGALT0000 Uncharacterized protein | ENSGALG00000024C 0.584705 | 2        |
| ENSGALT0000 \N                      | ENSGALG00000024C 0.885639 | 301.5    |
| ENSGALT0000 Uncharacterized protein | ENSGALG00000024C 0.839033 | 17.7949  |
| ENSGALT0000 Uncharacterized protein | ENSGALG00000024C 0.732351 | 26.2713  |
| ENSGALT0000 Uncharacterized protein | ENSGALG00000024C 0.807527 | 763.5    |
| ENSGALT0000 Uncharacterized protein | ENSGALG00000024C 0.581482 | 155.364  |
| ENSGALT0000 Uncharacterized protein | ENSGALG00000024C 0.945531 | 505.5    |
| ENSGALT0000 Uncharacterized protein | ENSGALG00000024C 0.997307 | 12.3511  |
| ENSGALT0000 Uncharacterized protein | ENSGALG00000024C 0.966521 | 394.5    |
| ENSGALT0000 Uncharacterized protein | ENSGALG00000024C 0.952971 | 110.253  |
| ENSGALT0000 Uncharacterized protein | ENSGALG00000024C 0.92591  | 637.747  |
| ENSGALT0000 Uncharacterized protein | ENSGALG00000024C 0.814234 | 0.99604  |
| ENSGALT0000 Uncharacterized protein | ENSGALG00000024C 0.60689  | 2.5      |
| ENSGALT0000 Uncharacterized protein | ENSGALG00000024C 0.951596 | 191.5    |
| ENSGALT0000 Uncharacterized protein | ENSGALG00000024C 0.719618 | 1.26002  |
| ENSGALT0000 Uncharacterized protein | ENSGALG00000024C 0.495202 | 0.5      |
| ENSGALT0000 Uncharacterized protein | ENSGALG0000002410.978644  | 291.5    |
| ENSGALT0000 Uncharacterized protein | ENSGALG0000002410.836699  | 625.5    |
| ENSGALT0000 Uncharacterized protein | ENSGALG0000002410.978182  | 3        |
| ENSGALT0000 Uncharacterized protein | ENSGALG0000002410.763168  | 7.5      |
| ENSGALT0000 Uncharacterized protein | ENSGALG0000002410.876088  | 3        |
| ENSGALT0000 Uncharacterized protein | ENSGALG0000002410.456838  | 1.40206  |
| ENSGALT0000 Uncharacterized protein | ENSGALG0000002410.621527  | 18       |
| ENSGALT0000 Uncharacterized protein | ENSGALG0000002410.950286  | 49.5     |
| ENSGALT0000 Uncharacterized protein | ENSGALG0000002410.465834  | 8.27E-10 |
| ENSGALT0000 Uncharacterized protein | ENSGALG0000002410.982128  | 35       |
| ENSGALT0000 Uncharacterized protein | ENSGALG0000002410.219737  | 3832.64  |
| ENSGALT0000 Uncharacterized protein | ENSGALG0000002410.818488  | 2        |
| ENSGALT0000 Uncharacterized protein | ENSGALG0000002410.956092  | 15.9704  |
| ENSGALT0000 Uncharacterized protein | ENSGALG0000002410.973635  | 17       |
| ENSGALT0000 Uncharacterized protein | ENSGALG0000002410.977804  | 553.717  |
| ENSGALT0000 \N                      | ENSGALG0000002410.88595   | 14.5     |
| ENSGALT0000 Uncharacterized protein | ENSGALG0000002410.18588   | 3.94E-24 |
| ENSGALT0000 Uncharacterized protein | ENSGALG0000002410.949551  | 153.343  |
| ENSGALT0000 \N                      | ENSGALG0000002410.848391  | 484.002  |
| ENSGALT0000 \N                      | ENSGALG0000002410.815787  | 4118     |
| ENSGALT0000 Uncharacterized protein | ENSGALG0000002410.86452   | 3.48523  |
| ENSGALT0000 Uncharacterized protein | ENSGALG0000002410.848216  | 349.282  |
| ENSGALT0000 Uncharacterized protein | ENSGALG000000241?         | 0        |
| ENSGALT0000 \N                      | ENSGALG0000002410.853815  | 1        |

|                                     |                            |          |
|-------------------------------------|----------------------------|----------|
| ENSGALT0000 \N                      | ENSGALG000000241?          | 0        |
| ENSGALT0000 \N                      | ENSGALG000000241?          | 0        |
| ENSGALT0000 \N                      | ENSGALG0000002410.0837606  | 0        |
| ENSGALT0000 \N                      | ENSGALG0000002410.464758   | 0        |
| ENSGALT0000 \N                      | ENSGALG000000241?          | 0        |
| ENSGALT0000 \N                      | ENSGALG000000241?          | 0        |
| ENSGALT0000 \N                      | ENSGALG0000002410.00528866 | 0        |
| ENSGALT0000 \N                      | ENSGALG0000002410.00528866 | 0        |
| ENSGALT0000 \N                      | ENSGALG0000002410.464758   | 0        |
| ENSGALT0000 \N                      | ENSGALG000000241?          | 0        |
| ENSGALT0000 \N                      | ENSGALG000000241?          | 0        |
| ENSGALT0000 \N                      | ENSGALG000000241?          | 0        |
| ENSGALT0000 \N                      | ENSGALG000000241?          | 0        |
| ENSGALT0000 \N                      | ENSGALG0000002410.464758   | 0        |
| ENSGALT0000 Uncharacterized protein | ENSGALG0000002410.64259    | 1.14238  |
| ENSGALT0000 \N                      | ENSGALG0000002410.171992   | 0.5      |
| ENSGALT0000 \N                      | ENSGALG0000002410.464758   | 2.76E-09 |
| ENSGALT0000 \N                      | ENSGALG0000002410.464758   | 1.45E-09 |
| ENSGALT0000 \N                      | ENSGALG000000241?          | 0        |
| ENSGALT0000 Uncharacterized protein | ENSGALG000000241?          | 0        |
| ENSGALT0000 Uncharacterized protein | ENSGALG0000002410.320078   | 0.81704  |
| ENSGALT0000 Uncharacterized protein | ENSGALG0000002410.621514   | 49.3105  |
| ENSGALT0000 Uncharacterized protein | ENSGALG0000002410.831827   | 4812.69  |
| ENSGALT0000 Uncharacterized protein | ENSGALG0000002410.744289   | 304.604  |
| ENSGALT0000 Uncharacterized protein | ENSGALG0000002410.891277   | 955      |
| ENSGALT0000 Uncharacterized protein | ENSGALG0000002410.649519   | 0.5      |
| ENSGALT0000 Uncharacterized protein | ENSGALG000000241?          | 0        |
| ENSGALT0000 \N                      | ENSGALG0000002410.967569   | 5        |
| ENSGALT0000 Uncharacterized protein | ENSGALG000000241?          | 0        |
| ENSGALT0000 Uncharacterized protein | ENSGALG000000241?          | 0        |
| ENSGALT0000 Uncharacterized protein | ENSGALG000000241?          | 0        |
| ENSGALT0000 Uncharacterized protein | ENSGALG000000241?          | 0        |
| ENSGALT0000 Uncharacterized protein | ENSGALG000000241?          | 0        |
| ENSGALT0000 Uncharacterized protein | ENSGALG0000002410.530195   | 18.0204  |
| ENSGALT0000 \N                      | ENSGALG000000241?          | 0        |
| ENSGALT0000 Uncharacterized protein | ENSGALG000000241?          | 0        |
| ENSGALT0000 Uncharacterized protein | ENSGALG000000241?          | 0        |
| ENSGALT0000 Uncharacterized protein | ENSGALG0000002410.464758   | 0        |
| ENSGALT0000 \N                      | ENSGALG0000002410.898356   | 0.5      |
| ENSGALT0000 Uncharacterized protein | ENSGALG0000002410.464734   | 0        |
| ENSGALT0000 \N                      | ENSGALG0000002410.853815   | 0.5      |
| ENSGALT0000 Uncharacterized protein | ENSGALG0000002410.464758   | 0        |
| ENSGALT0000 \N                      | ENSGALG0000002410.983527   | 637.5    |
| ENSGALT0000 Uncharacterized protein | ENSGALG000000242 0.468674  | 4.60E-16 |
| ENSGALT0000 Uncharacterized protein | ENSGALG000000242 0.464758  | 2.17E-25 |
| ENSGALT0000 Uncharacterized protein | ENSGALG000000242 0.0237062 | 1.11E-32 |
| ENSGALT0000 Uncharacterized protein | ENSGALG000000242 0.6854    | 1        |
| ENSGALT0000 Uncharacterized protein | ENSGALG000000242 0.396373  | 2.17E-25 |
| ENSGALT0000 Uncharacterized protein | ENSGALG000000242 0.464758  | 4.58E-24 |
| ENSGALT0000 Uncharacterized protein | ENSGALG000000242 0.464322  | 3.90E-25 |
| ENSGALT0000 Uncharacterized protein | ENSGALG000000242 0.464758  | 2.17E-25 |
| ENSGALT0000 Uncharacterized protein | ENSGALG000000242 0.464834  | 4.60E-16 |
| ENSGALT0000 Uncharacterized protein | ENSGALG000000242 0.468674  | 4.60E-16 |
| ENSGALT0000 Uncharacterized protein | ENSGALG000000242 0.464758  | 3.38E-10 |
| ENSGALT0000 Uncharacterized protein | ENSGALG000000242 ?         | 4.60E-16 |
| ENSGALT0000 Uncharacterized protein | ENSGALG000000242 ?         | 4.60E-16 |

|                                     |                           |          |
|-------------------------------------|---------------------------|----------|
| ENSGALT0000 Uncharacterized protein | ENSGALG000000242 ?        | 2.17E-25 |
| ENSGALT0000 Uncharacterized protein | ENSGALG000000242 0.464758 | 4.60E-16 |
| ENSGALT0000 Uncharacterized protein | ENSGALG000000242 0.22129  | 0        |
| ENSGALT0000 Uncharacterized protein | ENSGALG000000242 0.464758 | 2.17E-25 |
| ENSGALT0000 Uncharacterized protein | ENSGALG000000242 0.464322 | 3.38E-10 |
| ENSGALT0000 Uncharacterized protein | ENSGALG000000242 ?        | 0        |
| ENSGALT0000 Uncharacterized protein | ENSGALG000000242 0.464758 | 0        |
| ENSGALT0000 Uncharacterized protein | ENSGALG000000242 ?        | 4.60E-16 |
| ENSGALT0000 Uncharacterized protein | ENSGALG000000242 0.740073 | 2        |
| ENSGALT0000 Uncharacterized protein | ENSGALG000000242 0.464758 | 0        |
| ENSGALT0000 Uncharacterized protein | ENSGALG000000242 0.464758 | 2.17E-25 |
| ENSGALT0000 Uncharacterized protein | ENSGALG000000242 0.464758 | 3.38E-10 |
| ENSGALT0000 Uncharacterized protein | ENSGALG000000242 0.464758 | 0        |
| ENSGALT0000 Uncharacterized protein | ENSGALG000000242 ?        | 0        |
| ENSGALT0000 Uncharacterized protein | ENSGALG000000242 0.978826 | 287      |
| ENSGALT0000 Uncharacterized protein | ENSGALG000000242 0.464758 | 2.17E-25 |
| ENSGALT0000 Uncharacterized protein | ENSGALG000000242 ?        | 0        |
| ENSGALT0000 Uncharacterized protein | ENSGALG000000242 0.355228 | 2        |
| ENSGALT0000 Uncharacterized protein | ENSGALG000000242 ?        | 0        |
| ENSGALT0000 Uncharacterized protein | ENSGALG000000242 0.464758 | 0        |
| ENSGALT0000 Uncharacterized protein | ENSGALG000000242 ?        | 0        |
| ENSGALT0000 Uncharacterized protein | ENSGALG000000242 0.464758 | 0        |
| ENSGALT0000 Uncharacterized protein | ENSGALG000000242 0.464758 | 4.60E-16 |
| ENSGALT0000 Uncharacterized protein | ENSGALG000000242 0.464758 | 0        |
| ENSGALT0000 Uncharacterized protein | ENSGALG000000242 0.464758 | 3.90E-25 |
| ENSGALT0000 Uncharacterized protein | ENSGALG000000242 0.464758 | 0        |
| ENSGALT0000 Uncharacterized protein | ENSGALG000000242 0.464758 | 2.17E-25 |
| ENSGALT0000 Uncharacterized protein | ENSGALG000000242 0.464758 | 0        |
| ENSGALT0000 Uncharacterized protein | ENSGALG000000242 0.634173 | 0.00326  |
| ENSGALT0000 Uncharacterized protein | ENSGALG000000242 0.685125 | 1.01312  |
| ENSGALT0000 Uncharacterized protein | ENSGALG000000242 0.464758 | 0        |
| ENSGALT0000 Uncharacterized protein | ENSGALG000000242 0.553305 | 4.14E-10 |
| ENSGALT0000 Uncharacterized protein | ENSGALG000000242 0.415917 | 1.18201  |
| ENSGALT0000 Uncharacterized protein | ENSGALG000000242 0.805241 | 1.01722  |
| ENSGALT0000 Uncharacterized protein | ENSGALG000000242 0.464758 | 0        |
| ENSGALT0000 Uncharacterized protein | ENSGALG000000242 0.985296 | 623.5    |
| ENSGALT0000 Uncharacterized protein | ENSGALG000000242 0.969994 | 133      |
| ENSGALT0000 Uncharacterized protein | ENSGALG000000242 0.813147 | 316.158  |
| ENSGALT0000 Uncharacterized protein | ENSGALG000000242 0.974224 | 97.3446  |
| ENSGALT0000 Uncharacterized protein | ENSGALG000000242 0.844646 | 216      |
| ENSGALT0000 Uncharacterized protein | ENSGALG000000242 ?        | 0        |
| ENSGALT0000 Uncharacterized protein | ENSGALG000000242 0.85107  | 6        |
| ENSGALT0000 Uncharacterized protein | ENSGALG000000242 0.282346 | 4.80E-11 |
| ENSGALT0000 Uncharacterized protein | ENSGALG000000242 0.93017  | 539.586  |
| ENSGALT0000 Uncharacterized protein | ENSGALG000000242 0.917251 | 578.414  |
| ENSGALT0000 Uncharacterized protein | ENSGALG000000242 0.903177 | 192.5    |
| ENSGALT0000 Uncharacterized protein | ENSGALG000000242 0.970206 | 1108     |
| ENSGALT0000 Uncharacterized protein | ENSGALG000000242 0.464758 | 7.61E-08 |
| ENSGALT0000 Uncharacterized protein | ENSGALG000000242 0.861309 | 66       |
| ENSGALT0000 Uncharacterized protein | ENSGALG000000242 0.839507 | 6.80841  |
| ENSGALT0000 Uncharacterized protein | ENSGALG000000242 0.358817 | 1        |
| ENSGALT0000 Uncharacterized protein | ENSGALG000000242 0.470009 | 2.51E-08 |
| ENSGALT0000 Uncharacterized protein | ENSGALG000000242 0.835906 | 5        |
| ENSGALT0000 Uncharacterized protein | ENSGALG000000242 0.870527 | 165.087  |
| ENSGALT0000 Uncharacterized protein | ENSGALG000000242 0.822513 | 143.5    |
| ENSGALT0000 Uncharacterized protein | ENSGALG000000242 0.803045 | 711      |

|                                     |                           |          |
|-------------------------------------|---------------------------|----------|
| ENSGALT0000 Uncharacterized protein | ENSGALG000000242 0.714659 | 6.5      |
| ENSGALT0000 Uncharacterized protein | ENSGALG000000242 0.89483  | 8        |
| ENSGALT0000 Uncharacterized protein | ENSGALG000000242 0.464758 | 2.5      |
| ENSGALT0000 Uncharacterized protein | ENSGALG000000242 0.697601 | 73.1626  |
| ENSGALT0000 Uncharacterized protein | ENSGALG000000242 0.977852 | 17       |
| ENSGALT0000 Uncharacterized protein | ENSGALG000000242 0.680371 | 1.89579  |
| ENSGALT0000 Uncharacterized protein | ENSGALG000000243 0.923208 | 4        |
| ENSGALT0000 Uncharacterized protein | ENSGALG000000243 0.84313  | 125.5    |
| ENSGALT0000 Uncharacterized protein | ENSGALG000000243 ?        | 0        |
| ENSGALT0000 Uncharacterized protein | ENSGALG000000243 0.772593 | 4.18352  |
| ENSGALT0000 Uncharacterized protein | ENSGALG000000243 0.101098 | 1        |
| ENSGALT0000 Uncharacterized protein | ENSGALG000000243 0.961135 | 33       |
| ENSGALT0000 Uncharacterized protein | ENSGALG000000243 0.712233 | 112.747  |
| ENSGALT0000 Uncharacterized protein | ENSGALG000000243 0.607843 | 0.86722  |
| ENSGALT0000 \N                      | ENSGALG000000243 0.56409  | 4.5      |
| ENSGALT0000 \N                      | ENSGALG000000243 0.464758 | 4.43E-11 |
| ENSGALT0000 \N                      | ENSGALG000000243 0.593345 | 2.17E-07 |
| ENSGALT0000 \N                      | ENSGALG000000243 0.49938  | 0.67568  |
| ENSGALT0000 \N                      | ENSGALG000000243 0.464758 | 8.07E-10 |
| ENSGALT0000 \N                      | ENSGALG000000243 ?        | 2.45E-23 |
| ENSGALT0000 Uncharacterized protein | ENSGALG000000243 0.683403 | 0.5      |
| ENSGALT0000 Uncharacterized protein | ENSGALG000000243 0.587687 | 0        |
| ENSGALT0000 Uncharacterized protein | ENSGALG000000243 0.784723 | 8.21881  |
| ENSGALT0000 Uncharacterized protein | ENSGALG000000243 ?        | 0        |
| ENSGALT0000 Uncharacterized protein | ENSGALG000000243 0.964074 | 6        |
| ENSGALT0000 Uncharacterized protein | ENSGALG000000243 0.19461  | 0.18372  |
| ENSGALT0000 Uncharacterized protein | ENSGALG000000243 0.979302 | 61.6347  |
| ENSGALT0000 Uncharacterized protein | ENSGALG000000243 0.858609 | 99.2665  |
| ENSGALT0000 Uncharacterized protein | ENSGALG000000243 0.883834 | 53.0213  |
| ENSGALT0000 Uncharacterized protein | ENSGALG000000243 0.983937 | 396.026  |
| ENSGALT0000 Uncharacterized protein | ENSGALG000000243 0.920267 | 392.5    |
| ENSGALT0000 Uncharacterized protein | ENSGALG000000243 0.842278 | 44       |
| ENSGALT0000 Uncharacterized protein | ENSGALG000000243 0.800794 | 27.5     |
| ENSGALT0000 Uncharacterized protein | ENSGALG000000243 0.471881 | 11.5     |
| ENSGALT0000 Uncharacterized protein | ENSGALG000000243 0.740073 | 0.5      |
| ENSGALT0000 \N                      | ENSGALG000000243 0.535693 | 142.5    |
| ENSGALT0000 Uncharacterized protein | ENSGALG000000243 0.974214 | 456.028  |
| ENSGALT0000 Uncharacterized protein | ENSGALG000000243 0.704599 | 67.3759  |
| ENSGALT0000 Uncharacterized protein | ENSGALG000000243 0.993416 | 23.5567  |
| ENSGALT0000 Uncharacterized protein | ENSGALG000000243 0.759051 | 309.19   |
| ENSGALT0000 Uncharacterized protein | ENSGALG000000243 0.831082 | 3.18176  |
| ENSGALT0000 Uncharacterized protein | ENSGALG000000243 0.464758 | 7.02E-14 |
| ENSGALT0000 Uncharacterized protein | ENSGALG000000243 0.961588 | 27.9949  |
| ENSGALT0000 Uncharacterized protein | ENSGALG000000243 0.985835 | 45.0818  |
| ENSGALT0000 Uncharacterized protein | ENSGALG000000243 0.931714 | 822      |
| ENSGALT0000 Uncharacterized protein | ENSGALG000000243 0.949625 | 1540.5   |
| ENSGALT0000 Uncharacterized protein | ENSGALG000000243 0.469714 | 18.682   |
| ENSGALT0000 Uncharacterized protein | ENSGALG000000243 0.873942 | 14       |
| ENSGALT0000 Uncharacterized protein | ENSGALG000000243 0.802663 | 3.76171  |
| ENSGALT0000 Uncharacterized protein | ENSGALG000000243 0.649519 | 8.5      |
| ENSGALT0000 Uncharacterized protein | ENSGALG000000243 0.530589 | 4.63183  |
| ENSGALT0000 Uncharacterized protein | ENSGALG000000243 ?        | 2.22E-31 |
| ENSGALT0000 Uncharacterized protein | ENSGALG000000243 0.464758 | 0        |
| ENSGALT0000 Uncharacterized protein | ENSGALG000000243 0.817639 | 68.7754  |
| ENSGALT0000 Uncharacterized protein | ENSGALG000000243 0.703591 | 78.7693  |
| ENSGALT0000 Uncharacterized protein | ENSGALG000000243 0.825864 | 131.5    |

|                                             |                            |          |
|---------------------------------------------|----------------------------|----------|
| ENSGALT0000 Uncharacterized protein         | ENSGALG000000243 ?         | 0        |
| ENSGALT0000 Uncharacterized protein         | ENSGALG000000243 0.902831  | 19       |
| ENSGALT0000 Uncharacterized protein         | ENSGALG000000243 0.22578   | 0.5      |
| ENSGALT0000 LOC427729 proteinUncharacterize | ENSGALG000000243 ?         | 0        |
| ENSGALT0000 Uncharacterized protein         | ENSGALG000000243 0.843526  | 37       |
| ENSGALT0000 \N                              | ENSGALG000000243 0.617593  | 10216.5  |
| ENSGALT0000 \N                              | ENSGALG000000243 0.987633  | 64.5     |
| ENSGALT0000 Uncharacterized protein         | ENSGALG000000243 0.896447  | 799      |
| ENSGALT0000 Uncharacterized protein         | ENSGALG000000243 0.758625  | 1051.5   |
| ENSGALT0000 Uncharacterized protein         | ENSGALG000000243 0.956727  | 652.5    |
| ENSGALT0000 Uncharacterized protein         | ENSGALG000000243 0.71515   | 138.093  |
| ENSGALT0000 \N                              | ENSGALG000000243 0.835446  | 109.5    |
| ENSGALT0000 \N                              | ENSGALG000000243 0.925999  | 6.05728  |
| ENSGALT0000 Uncharacterized protein         | ENSGALG000000243 0.746031  | 14.5     |
| ENSGALT0000 Uncharacterized protein         | ENSGALG000000243 0.966986  | 9.53156  |
| ENSGALT0000 Uncharacterized protein         | ENSGALG000000243 0.775456  | 439      |
| ENSGALT0000 Uncharacterized protein         | ENSGALG000000243 0.780352  | 249.5    |
| ENSGALT0000 Uncharacterized protein         | ENSGALG000000243 0.824827  | 824.5    |
| ENSGALT0000 Uncharacterized protein         | ENSGALG000000243 0.823305  | 142.5    |
| ENSGALT0000 Uncharacterized protein         | ENSGALG000000243 0.407524  | 0.67176  |
| ENSGALT0000 Uncharacterized protein         | ENSGALG000000244 0.68308   | 480.802  |
| ENSGALT0000 Uncharacterized protein         | ENSGALG000000244 0.668007  | 192.701  |
| ENSGALT0000 Uncharacterized protein         | ENSGALG000000244 0.976045  | 121.117  |
| ENSGALT0000 Uncharacterized protein         | ENSGALG000000244 0.978788  | 374.123  |
| ENSGALT0000 \N                              | ENSGALG000000244 ?         | 0        |
| ENSGALT0000 \N                              | ENSGALG000000244 0.603682  | 1        |
| ENSGALT0000 \N                              | ENSGALG000000244 0.191772  | 43.632   |
| ENSGALT0000 \N                              | ENSGALG000000244 0.464758  | 0        |
| ENSGALT0000 \N                              | ENSGALG000000244 ?         | 0        |
| ENSGALT0000 \N                              | ENSGALG000000244 0.64738   | 9.94E-29 |
| ENSGALT0000 \N                              | ENSGALG000000244 0.621892  | 34.5864  |
| ENSGALT0000 Uncharacterized protein         | ENSGALG000000244 0.654831  | 16.5     |
| ENSGALT0000 Uncharacterized protein         | ENSGALG000000244 0.924556  | 22.5     |
| ENSGALT0000 Uncharacterized protein         | ENSGALG000000244 0.943496  | 115.338  |
| ENSGALT0000 \N                              | ENSGALG000000244 0.846991  | 144.008  |
| ENSGALT0000 MHC class II antigen            | ENSGALG000000244 0.901982  | 12.5964  |
| ENSGALT0000 \N                              | ENSGALG000000244 0.967215  | 26.0431  |
| ENSGALT0000 MHC type antigen B-G            | ENSGALG000000244 0.945409  | 4.83381  |
| ENSGALT0000 MHC type antigen B-G            | ENSGALG000000244 0.994696  | 12.4109  |
| ENSGALT0000 \N                              | ENSGALG000000244 0.73116   | 2.52778  |
| ENSGALT0000 MHC class II antigen            | ENSGALG000000244 0.983343  | 122.167  |
| ENSGALT0000 \N                              | ENSGALG000000244 0.0571412 | 7.46943  |
| ENSGALT0000 \N                              | ENSGALG000000244 0.588609  | 169.631  |
| ENSGALT0000 \N                              | ENSGALG000000244 0.737033  | 6.74506  |
| ENSGALT0000 Uncharacterized protein         | ENSGALG000000244 0.464758  | 0.5      |
| ENSGALT0000 Uncharacterized protein         | ENSGALG000000244 ?         | 0        |
| ENSGALT0000 Uncharacterized protein         | ENSGALG000000244 ?         | 0        |
| ENSGALT0000 Uncharacterized protein         | ENSGALG000000244 ?         | 0        |
| ENSGALT0000 Uncharacterized protein         | ENSGALG000000244 ?         | 0        |
| ENSGALT0000 Uncharacterized protein         | ENSGALG000000244 0.678727  | 7        |
| ENSGALT0000 Uncharacterized protein         | ENSGALG000000244 ?         | 0        |
| ENSGALT0000 Uncharacterized protein         | ENSGALG000000244 ?         | 0        |
| ENSGALT0000 Uncharacterized protein         | ENSGALG000000244 ?         | 0        |
| ENSGALT0000 Uncharacterized protein         | ENSGALG000000244 0.0163282 | 76       |
| ENSGALT0000 Uncharacterized protein         | ENSGALG000000244 0.671151  | 0.5      |
| ENSGALT0000 Uncharacterized protein         | ENSGALG000000244 ?         | 0        |

|                                     |                          |          |
|-------------------------------------|--------------------------|----------|
| ENSGALT0000 Uncharacterized protein | ENSGALG000000244?        | 0        |
| ENSGALT0000 Uncharacterized protein | ENSGALG0000002440.792127 | 10.5     |
| ENSGALT0000 Uncharacterized protein | ENSGALG0000002440.694282 | 36.5     |
| ENSGALT0000 Uncharacterized protein | ENSGALG0000002440.932956 | 27.5     |
| ENSGALT0000 Uncharacterized protein | ENSGALG0000002440.649519 | 0        |
| ENSGALT0000 Uncharacterized protein | ENSGALG0000002440.851008 | 5.5      |
| ENSGALT0000 Uncharacterized protein | ENSGALG000000244?        | 0        |
| ENSGALT0000 Uncharacterized protein | ENSGALG0000002440.603682 | 0        |
| ENSGALT0000 Uncharacterized protein | ENSGALG0000002440.917137 | 7        |
| ENSGALT0000 Uncharacterized protein | ENSGALG0000002440.131884 | 6.5      |
| ENSGALT0000 Uncharacterized protein | ENSGALG0000002440.394324 | 3.5      |
| ENSGALT0000 Uncharacterized protein | ENSGALG000000244?        | 0        |
| ENSGALT0000 Uncharacterized protein | ENSGALG0000002440.840509 | 1.5      |
| ENSGALT0000 Uncharacterized protein | ENSGALG000000244?        | 0        |
| ENSGALT0000 Uncharacterized protein | ENSGALG0000002440.768475 | 6        |
| ENSGALT0000 Uncharacterized protein | ENSGALG0000002440.717045 | 18       |
| ENSGALT0000 Uncharacterized protein | ENSGALG0000002440.404888 | 1        |
| ENSGALT0000 Uncharacterized protein | ENSGALG0000002440.631223 | 1        |
| ENSGALT0000 Uncharacterized protein | ENSGALG0000002440.817579 | 2.5      |
| ENSGALT0000 Uncharacterized protein | ENSGALG0000002440.295176 | 3        |
| ENSGALT0000 Uncharacterized protein | ENSGALG000000244?        | 0        |
| ENSGALT0000 Uncharacterized protein | ENSGALG0000002440.831342 | 21.5     |
| ENSGALT0000 Uncharacterized protein | ENSGALG000000244?        | 0        |
| ENSGALT0000 Uncharacterized protein | ENSGALG0000002440.989554 | 1101.5   |
| ENSGALT0000 \N                      | ENSGALG000000244?        | 0        |
| ENSGALT0000 \N                      | ENSGALG000000244?        | 0        |
| ENSGALT0000 \N                      | ENSGALG000000251?        | 0        |
| ENSGALT0000 \N                      | ENSGALG000000251?        | 0        |
| ENSGALT0000 \N                      | ENSGALG000000251?        | 0        |
| ENSGALT0000 \N                      | ENSGALG000000251?        | 0        |
| ENSGALT0000 \N                      | ENSGALG000000251?        | 0        |
| ENSGALT0000 \N                      | ENSGALG000000251?        | 0        |
| ENSGALT0000 \N                      | ENSGALG000000251?        | 0        |
| ENSGALT0000 \N                      | ENSGALG000000251?        | 0        |
| ENSGALT0000 \N                      | ENSGALG000000251?        | 0        |
| ENSGALT0000 \N                      | ENSGALG000000251?        | 0        |
| ENSGALT0000 \N                      | ENSGALG000000251?        | 0        |
| ENSGALT0000 \N                      | ENSGALG000000251?        | 0        |
| ENSGALT0000 \N                      | ENSGALG000000251?        | 0        |
| ENSGALT0000 \N                      | ENSGALG0000002510.464758 | 3.53E-08 |
| ENSGALT0000 \N                      | ENSGALG000000251?        | 0        |
| ENSGALT0000 \N                      | ENSGALG000000251?        | 0        |
| ENSGALT0000 \N                      | ENSGALG0000002510.795247 | 3        |
| ENSGALT0000 \N                      | ENSGALG000000251?        | 0        |
| ENSGALT0000 \N                      | ENSGALG000000251?        | 0        |
| ENSGALT0000 \N                      | ENSGALG0000002510.464758 | 0        |
| ENSGALT0000 \N                      | ENSGALG0000002510.611788 | 0.0001   |
| ENSGALT0000 \N                      | ENSGALG000000252?        | 0        |
| ENSGALT0000 \N                      | ENSGALG000000252?        | 0        |
| ENSGALT0000 \N                      | ENSGALG000000252?        | 0        |
| ENSGALT0000 \N                      | ENSGALG000000252?        | 0        |
| ENSGALT0000 \N                      | ENSGALG0000002520.649519 | 0        |
| ENSGALT0000 \N                      | ENSGALG000000252?        | 0        |

|                |                           |          |
|----------------|---------------------------|----------|
| ENSGALT0000 \N | ENSGALG000000252 ?        | 0        |
| ENSGALT0000 \N | ENSGALG000000252 ?        | 0        |
| ENSGALT0000 \N | ENSGALG000000252 ?        | 0        |
| ENSGALT0000 \N | ENSGALG000000252 ?        | 0        |
| ENSGALT0000 \N | ENSGALG000000252 ?        | 0        |
| ENSGALT0000 \N | ENSGALG000000252 0.455508 | 0.00063  |
| ENSGALT0000 \N | ENSGALG000000252 ?        | 0        |
| ENSGALT0000 \N | ENSGALG000000252 0.464758 | 0.5      |
| ENSGALT0000 \N | ENSGALG000000252 ?        | 0        |
| ENSGALT0000 \N | ENSGALG000000252 ?        | 0        |
| ENSGALT0000 \N | ENSGALG000000253 ?        | 0        |
| ENSGALT0000 \N | ENSGALG000000253 ?        | 0        |
| ENSGALT0000 \N | ENSGALG000000253 ?        | 0        |
| ENSGALT0000 \N | ENSGALG000000253 ?        | 0        |
| ENSGALT0000 \N | ENSGALG000000253 0.853815 | 1        |
| ENSGALT0000 \N | ENSGALG000000253 ?        | 0        |
| ENSGALT0000 \N | ENSGALG000000253 ?        | 0        |
| ENSGALT0000 \N | ENSGALG000000253 ?        | 0        |
| ENSGALT0000 \N | ENSGALG000000253 0.842022 | 7.5      |
| ENSGALT0000 \N | ENSGALG000000253 ?        | 0        |
| ENSGALT0000 \N | ENSGALG000000253 0.464758 | 2.44E-11 |
| ENSGALT0000 \N | ENSGALG000000253 0.464758 | 0        |
| ENSGALT0000 \N | ENSGALG000000253 ?        | 0        |
| ENSGALT0000 \N | ENSGALG000000253 0.718066 | 1        |
| ENSGALT0000 \N | ENSGALG000000253 ?        | 0        |
| ENSGALT0000 \N | ENSGALG000000253 ?        | 0        |
| ENSGALT0000 \N | ENSGALG000000254 0.464758 | 0        |
| ENSGALT0000 \N | ENSGALG000000254 ?        | 0        |
| ENSGALT0000 \N | ENSGALG000000254 ?        | 0        |
| ENSGALT0000 \N | ENSGALG000000254 ?        | 0        |
| ENSGALT0000 \N | ENSGALG000000254 ?        | 0        |
| ENSGALT0000 \N | ENSGALG000000254 ?        | 0        |
| ENSGALT0000 \N | ENSGALG000000254 ?        | 0        |
| ENSGALT0000 \N | ENSGALG000000254 ?        | 0        |
| ENSGALT0000 \N | ENSGALG000000254 ?        | 0        |
| ENSGALT0000 \N | ENSGALG000000254 ?        | 0        |
| ENSGALT0000 \N | ENSGALG000000254 0.611788 | 0.0001   |
| ENSGALT0000 \N | ENSGALG000000254 ?        | 0        |
| ENSGALT0000 \N | ENSGALG000000254 ?        | 0        |
| ENSGALT0000 \N | ENSGALG000000254 ?        | 0        |
| ENSGALT0000 \N | ENSGALG000000254 ?        | 0        |
| ENSGALT0000 \N | ENSGALG000000254 ?        | 0        |
| ENSGALT0000 \N | ENSGALG000000254 ?        | 0        |
| ENSGALT0000 \N | ENSGALG000000254 ?        | 0        |
| ENSGALT0000 \N | ENSGALG000000254 ?        | 0        |
| ENSGALT0000 \N | ENSGALG000000254 ?        | 0        |
| ENSGALT0000 \N | ENSGALG000000254 ?        | 0        |
| ENSGALT0000 \N | ENSGALG000000255 ?        | 0        |
| ENSGALT0000 \N | ENSGALG000000255 ?        | 0        |
| ENSGALT0000 \N | ENSGALG000000255 ?        | 0        |
| ENSGALT0000 \N | ENSGALG000000255 ?        | 0        |
| ENSGALT0000 \N | ENSGALG000000255 0.464758 | 0.05095  |
| ENSGALT0000 \N | ENSGALG000000255 ?        | 0        |
| ENSGALT0000 \N | ENSGALG000000255 ?        | 0        |
| ENSGALT0000 \N | ENSGALG000000255 ?        | 0        |
| ENSGALT0000 \N | ENSGALG000000255 ?        | 0        |

|                                                |                  |          |          |
|------------------------------------------------|------------------|----------|----------|
| ENSGALT0000 \N                                 | ENSGALG00000025E | 0.749826 | 1400     |
| ENSGALT0000 \N                                 | ENSGALG00000025E | 0.649519 | 0.50017  |
| ENSGALT0000 \N                                 | ENSGALG00000025E | ?        | 0        |
| ENSGALT0000 \N                                 | ENSGALG00000025E | ?        | 0        |
| ENSGALT0000 \N                                 | ENSGALG00000025E | 0.344739 | 2092.5   |
| ENSGALT0000 \N                                 | ENSGALG00000025E | 0.464759 | 1.02E-07 |
| ENSGALT0000 \N                                 | ENSGALG00000025E | ?        | 0        |
| ENSGALT0000 \N                                 | ENSGALG00000025E | 0.970793 | 162.041  |
| ENSGALT0000 \N                                 | ENSGALG00000025E | 0.850277 | 792.478  |
| ENSGALT0000 \N                                 | ENSGALG00000025E | 0.544331 | 0        |
| ENSGALT0000 \N                                 | ENSGALG00000025E | 0.850277 | 792.478  |
| ENSGALT0000 \N                                 | ENSGALG00000025E | ?        | 0        |
| ENSGALT0000 \N                                 | ENSGALG00000025E | ?        | 9.49E-26 |
| ENSGALT0000 ectonucleoside triphosphate diphos | ENTPD1           | 0.9252   | 977.503  |
| ENSGALT0000 ectonucleoside triphosphate diphos | ENTPD2           | 0.994707 | 897.5    |
| ENSGALT0000 ectonucleoside triphosphate diphos | ENTPD3           | 0.932902 | 47       |
| ENSGALT0000 ectonucleoside triphosphate diphos | ENTPD4           | 0.977245 | 574      |
| ENSGALT0000 ectonucleoside triphosphate diphos | ENTPD5           | 0.984238 | 514      |
| ENSGALT0000 ectonucleoside triphosphate diphos | ENTPD6           | 0.970525 | 811.504  |
| ENSGALT0000 ectonucleoside triphosphate diphos | ENTPD7           | 0.913239 | 471.5    |
| ENSGALT0000 ectonucleoside triphosphate diphos | ENTPD8           | 0.989244 | 332.333  |
| ENSGALT0000 enhancer of yellow 2 homolog (Dro  | ENY2             | 0.769197 | 766.224  |
| ENSGALT0000 eomesodermin                       | EOMES            | 0.464758 | 0.5      |
| ENSGALT0000 E1A binding protein p300           | EP300            | 0.987019 | 7014.1   |
| ENSGALT0000 E1A binding protein p400           | EP400            | 0.964446 | 3781.57  |
| ENSGALT0000 endothelial PAS domain protein 1   | EPAS1            | 0.677672 | 458      |
| ENSGALT0000 erythrocyte membrane protein banc  | EPB41            | 0.872665 | 2409.5   |
| ENSGALT0000 erythrocyte membrane protein banc  | EPB41L1          | 0.849791 | 1781.96  |
| ENSGALT0000 erythrocyte membrane protein banc  | EPB41L2          | 0.995764 | 1160.5   |
| ENSGALT0000 erythrocyte membrane protein banc  | EPB41L3          | 0.72511  | 964.5    |
| ENSGALT0000 erythrocyte membrane protein banc  | EPB41L4A         | 0.73774  | 204.5    |
| ENSGALT0000 erythrocyte membrane protein banc  | EPB41L4B         | 0.964364 | 519.498  |
| ENSGALT0000 erythrocyte membrane protein banc  | EPB41L5          | 0.997528 | 1287.5   |
| ENSGALT0000 erythrocyte membrane protein banc  | EPB42            | 0.857995 | 33.5     |
| ENSGALT0000 enhancer of polycomb homolog 1 (   | EPC1             | 0.962385 | 1452.5   |
| ENSGALT0000 enhancer of polycomb homolog 2 (   | EPC2             | 0.963874 | 1010.5   |
| ENSGALT0000 epithelial cell adhesion molecule  | EPCAM            | 0.986785 | 11777.5  |
| ENSGALT0000 ependymin related protein 1 (zebra | EPDR1            | 0.696292 | 192      |
| ENSGALT0000 ectopic P-granules autophagy prote | EPG5             | 0.9728   | 632.5    |
| ENSGALT0000 epithelial mitogen homolog (mouse  | EPGN             | 0.969011 | 52.5     |
| ENSGALT0000 EPH receptor A1                    | EPHA1            | 0.961279 | 246      |
| ENSGALT0000 EPH receptor A10                   | EPHA10           | 0.818047 | 390      |
| ENSGALT0000 EPH receptor A3                    | EPHA3            | 0.955767 | 430.002  |
| ENSGALT0000 EPH receptor A4                    | EPHA4            | 0.858805 | 4715.44  |
| ENSGALT0000 EPH receptor A5                    | EPHA5            | 0.768539 | 4870.95  |
| ENSGALT0000 EPH receptor A6                    | EPHA6            | 0.990527 | 97       |
| ENSGALT0000 EPH receptor A7                    | EPHA7            | 0.977699 | 4979     |
| ENSGALT0000 EPH receptor A8                    | EPHA8            | 0.631278 | 9.05905  |
| ENSGALT0000 EPH receptor B1                    | EPHB1            | 0.886259 | 1617.88  |
| ENSGALT0000 EPH receptor B2                    | EPHB2            | 0.976909 | 6681.36  |
| ENSGALT0000 EPH receptor B3                    | EPHB3            | 0.999445 | 7286.92  |
| ENSGALT0000 EPH receptor B6                    | EPHB6            | 0.962307 | 2372.5   |
| ENSGALT0000 epoxide hydrolase 1, microsomal (p | EPHX1            | 0.981418 | 347      |
| ENSGALT0000 epoxide hydrolase 2, cytoplasmic   | EPHX2            | 0.847009 | 898      |
| ENSGALT0000 epoxide hydrolase 4                | EPHX4            | 0.740556 | 17       |
| ENSGALT0000 epilepsy, progressive myoclonus ty | EPM2A            | 0.893818 | 169.5    |



|                                                    |         |          |         |
|----------------------------------------------------|---------|----------|---------|
| ENSGALT0000 epsin 2                                | EPN2    | 0.920387 | 2268.55 |
| ENSGALT0000 epiplakin 1                            | EPPK1   | 0.934795 | 558.085 |
| ENSGALT0000 glutamyl-prolyl-tRNA synthetase        | EPRS    | 0.936637 | 6518    |
| ENSGALT0000 epidermal growth factor receptor pα    | EPS15   | 0.917355 | 2393.47 |
| ENSGALT0000 epidermal growth factor receptor pα    | EPS15L1 | 0.950181 | 609     |
| ENSGALT0000 epidermal growth factor receptor pα    | EPS8    | 0.968487 | 1920.5  |
| ENSGALT0000 EPS8-like 2                            | EPS8L2  | 0.994307 | 1412.5  |
| ENSGALT0000 epithelial stromal interaction 1 (bre  | EPSTI1  | 0.186209 | 0.5     |
| ENSGALT0000 ethanolaminephosphotransferase 1       | EPT1    | 0.853808 | 2062    |
| ENSGALT0000 epiphycan                              | EPYC    | 0.718289 | 373.5   |
| ENSGALT0000 Era G-protein-like 1 (E. coli)         | ERAL1   | 0.961473 | 580.5   |
| ENSGALT0000 endoplasmic reticulum aminopeptic      | ERAP1   | 0.932766 | 132     |
| ENSGALT0000 v-erb-b2 erythroblastic leukemia vir   | ERBB2   | 0.995669 | 3255.99 |
| ENSGALT0000 erbb2 interacting protein              | ERBB2IP | 0.984635 | 2167.01 |
| ENSGALT0000 v-erb-a erythroblastic leukemia vira   | ERBB4   | 0.85687  | 452.503 |
| ENSGALT0000 ELKS/RAB6-interacting/CAST fami        | ERC1    | 0.955505 | 916     |
| ENSGALT0000 ELKS/RAB6-interacting/CAST fami        | ERC2    | 0.883622 | 57      |
| ENSGALT0000 excision repair cross-complementir     | ERCC3   | 0.940008 | 1736    |
| ENSGALT0000 excision repair cross-complementir     | ERCC4   | 0.962377 | 353.999 |
| ENSGALT0000 excision repair cross-complementir     | ERCC5   | 0.990936 | 470.999 |
| ENSGALT0000 excision repair cross-complementir     | ERCC6   | 0.976779 | 743     |
| ENSGALT0000 excision repair cross-complementir     | ERCC6L  | 0.884157 | 289.5   |
| ENSGALT0000 excision repair cross-complementir     | ERCC8   | 0.983714 | 199     |
| ENSGALT0000 epiregulin                             | EREG    | 0.851404 | 2       |
| ENSGALT0000 v-ets erythroblastosis virus E26 onc   | ERG     | 0.866851 | 91.9999 |
| ENSGALT0000 endoplasmic reticulum-golgi interm     | ERGIC1  | 0.925959 | 3155.5  |
| ENSGALT0000 ERGIC and golgi 2                      | ERGIC2  | 0.88898  | 1474    |
| ENSGALT0000 ERGIC and golgi 3                      | ERGIC3  | 0.961049 | 1876    |
| ENSGALT0000 enhancer of rudimentary homolog (ERH   | ERH     | 0.675547 | 5050    |
| ENSGALT0000 exoribonuclease 1                      | ERI1    | 0.960535 | 936     |
| ENSGALT0000 ERI1 exoribonuclease family memt       | ERI2    | 0.965889 | 143     |
| ENSGALT0000 ERI1 exoribonuclease family memt       | ERI3    | 0.949933 | 1127    |
| ENSGALT0000 glutamate-rich 1                       | ERIC1   | 0.93536  | 64      |
| ENSGALT0000 endoplasmic reticulum lectin 1         | ERLEC1  | 0.955074 | 1560.28 |
| ENSGALT0000 ER lipid raft associated 1             | ERLIN1  | 0.971728 | 3843.5  |
| ENSGALT0000 ER lipid raft associated 2             | ERLIN2  | 0.900375 | 2316.5  |
| ENSGALT0000 ermin, ERM-like protein                | ERMN    | 0.696267 | 62      |
| ENSGALT0000 endoplasmic reticulum metallopept      | ERP1    | 0.971011 | 363.5   |
| ENSGALT0000 endoplasmic reticulum to nucleus s     | ERN1    | 0.997843 | 785     |
| ENSGALT0000 ERO1-like (S. cerevisiae)              | ERO1L   | 0.99837  | 640.001 |
| ENSGALT0000 ERO1-like beta (S. cerevisiae)         | ERO1LB  | 0.975862 | 350     |
| ENSGALT0000 endoplasmic reticulum protein 27       | ERP27   | 0.956208 | 1.5     |
| ENSGALT0000 endoplasmic reticulum protein 29       | ERP29   | 0.903813 | 2849    |
| ENSGALT0000 endoplasmic reticulum protein 44       | ERP44   | 0.950927 | 2354.5  |
| ENSGALT0000 ERBB receptor feedback inhibitor 1     | ERRFI1  | 0.975822 | 382     |
| ENSGALT0000 endothelial cell adhesion molecule     | ESAM    | 0.889442 | 475.5   |
| ENSGALT0000 establishment of cohesion 1 homol      | ESCO1   | 0.970802 | 570.503 |
| ENSGALT0000 establishment of cohesion 1 homol      | ESCO2   | 0.972231 | 546.5   |
| ENSGALT0000 esterase D                             | ESD     | 0.946798 | 2320    |
| ENSGALT0000 ESF1, nucleolar pre-rRNA processi      | ESF1    | 0.93212  | 325     |
| ENSGALT0000 extra spindle pole bodies homolog      | ESPL1   | 0.950769 | 2215    |
| ENSGALT0000 espin                                  | ESPN    | 0.66795  | 383.5   |
| ENSGALT0000 espin-like                             | ESPNL   | 0.087774 | 24.5    |
| ENSGALT0000 estrogen receptor 1                    | ESR1    | 0.982196 | 5.5     |
| ENSGALT0000 estrogen receptor 2 (ER beta)          | ESR2    | 0.96438  | 15      |
| ENSGALT0000 epithelial splicing regulatory protein | ESRP1   | 0.958593 | 728     |

|                                                       |         |          |         |
|-------------------------------------------------------|---------|----------|---------|
| ENSGALT0000 epithelial splicing regulatory protein    | ESRP2   | 0.965102 | 4276    |
| ENSGALT0000 estrogen-related receptor beta            | ESRRB   | 0.898767 | 104     |
| ENSGALT0000 estrogen-related receptor gamma           | ESRRG   | 0.650798 | 917.994 |
| ENSGALT0000 extended synaptotagmin-like protein       | ESYT2   | 0.998593 | 606.5   |
| ENSGALT0000 Ewing tumor-associated antigen 1          | ETAA1   | 0.984296 | 681     |
| ENSGALT0000 eukaryotic translation termination factor | ETF1    | 0.919239 | 1640.5  |
| ENSGALT0000 electron-transfer-flavoprotein, alpha     | ETFA    | 0.766946 | 5276.67 |
| ENSGALT0000 electron-transferring-flavoprotein domain | ETFDH   | 0.952002 | 1953.16 |
| ENSGALT0000 ethylmalonic encephalopathy 1             | ETHE1   | 0.427167 | 410.5   |
| ENSGALT0000 ethanolamine kinase 1                     | ETNK1   | 0.99638  | 2010    |
| ENSGALT0000 ethanolamine kinase 2                     | ETNK2   | 0.751855 | 99      |
| ENSGALT0000 v-ets erythroblastosis virus E26 oncogene | ETS2    | 0.908274 | 478.5   |
| ENSGALT0000 ets variant 1                             | ETV1    | 0.811995 | 1123.5  |
| ENSGALT0000 ets variant 3                             | ETV3    | 0.971593 | 1071.5  |
| ENSGALT0000 ets variant 4                             | ETV4    | 0.855213 | 5634.61 |
| ENSGALT0000 ets variant 5                             | ETV5    | 0.952908 | 2290.52 |
| ENSGALT0000 ets variant gene 6 (TEL oncogene)         | ETV6    | 0.911316 | 440.93  |
| ENSGALT0000 ets variant 7                             | ETV7    | 0.947745 | 32.5    |
| ENSGALT0000 Ellis van Creveld syndrome                | EVC     | 0.987617 | 863.506 |
| ENSGALT0000 Ellis van Creveld syndrome 2              | EVC2    | 0.922039 | 571.002 |
| ENSGALT0000 ecotropic viral integration site 2A       | EVI2A   | 0.996824 | 7       |
| ENSGALT0000 ecotropic viral integration site 5        | EVI5    | 0.971502 | 1036.5  |
| ENSGALT0000 ecotropic viral integration site 5-like   | EVI5L   | 0.945222 | 786.5   |
| ENSGALT0000 Enah/Vasp-like                            | EVL     | 0.769933 | 1536.5  |
| ENSGALT0000 envoplakin                                | EVPL    | 0.772507 | 795.5   |
| ENSGALT0000 even-skipped homeobox 2                   | EVX2    | 0.464758 | 0.5     |
| ENSGALT0000 Ewing sarcoma breakpoint region 1         | EWSR1   | 0.794686 | 5045.09 |
| ENSGALT0000 exonuclease 3'-5' domain containing       | EXD2    | 0.98437  | 1227    |
| ENSGALT0000 exonuclease 3'-5' domain containing       | EXD3    | 0.976498 | 737.5   |
| ENSGALT0000 exonuclease 1                             | EXO1    | 0.914654 | 308     |
| ENSGALT0000 exocyst complex component 1               | EXOC1   | 0.954552 | 1116.5  |
| ENSGALT0000 exocyst complex component 2               | EXOC2   | 0.971882 | 1273.5  |
| ENSGALT0000 exocyst complex component 3               | EXOC3   | 0.95137  | 1189    |
| ENSGALT0000 exocyst complex component 3-like          | EXOC3L1 | 0.874093 | 1490    |
| ENSGALT0000 exocyst complex component 3-like          | EXOC3L4 | 0.980905 | 17.5    |
| ENSGALT0000 exocyst complex component 4               | EXOC4   | 0.975163 | 3392.48 |
| ENSGALT0000 exocyst complex component 5               | EXOC5   | 0.954944 | 2257    |
| ENSGALT0000 exocyst complex component 6               | EXOC6   | 0.965388 | 363     |
| ENSGALT0000 exocyst complex component 6B              | EXOC6B  | 0.951303 | 416     |
| ENSGALT0000 exocyst complex component 7               | EXOC7   | 0.975827 | 2820.06 |
| ENSGALT0000 exocyst complex component 8               | EXOC8   | 0.906748 | 1221    |
| ENSGALT0000 endo/exonuclease (5'-3'), endonuclease    | EXOG    | 0.927792 | 735     |
| ENSGALT0000 exosome component 1                       | EXOSC1  | 0.268471 | 781     |
| ENSGALT0000 exosome component 10                      | EXOSC10 | 0.939426 | 1636    |
| ENSGALT0000 exosome component 2                       | EXOSC2  | 0.733171 | 2132    |
| ENSGALT0000 exosome component 3                       | EXOSC3  | 0.210006 | 268     |
| ENSGALT0000 exosome component 7                       | EXOSC7  | 0.74868  | 644     |
| ENSGALT0000 exosome component 8                       | EXOSC8  | 0.889493 | 738     |
| ENSGALT0000 exosome component 9                       | EXOSC9  | 0.954373 | 626.999 |
| ENSGALT0000 exostosin 1                               | EXT1    | 0.993155 | 2146.5  |
| ENSGALT0000 hypothetical protein LOC425859            | EXT2    | 0.974551 | 1929.52 |
| ENSGALT0000 exostoses (multiple)-like 2               | EXTL2   | 0.98632  | 139     |
| ENSGALT0000 exostoses (multiple)-like 3               | EXTL3   | 0.957435 | 3163    |
| ENSGALT0000 eyes absent homolog 1 (Drosophila)        | EYA1    | 0.994195 | 4951.5  |
| ENSGALT0000 eyes absent homolog 2 (Drosophila)        | EYA2    | 0.521981 | 671.5   |
| ENSGALT0000 eyes absent homolog 3 (Drosophila)        | EYA3    | 0.955959 | 1210    |

|                                                      |              |           |         |
|------------------------------------------------------|--------------|-----------|---------|
| ENSGALT0000 eyes absent homolog 4 (Drosophila)       | EYA4         | 0.98085   | 3834    |
| ENSGALT0000 eyes shut homolog (Drosophila)           | EYS          | 0.672602  | 4       |
| ENSGALT0000 enhancer of zeste homolog 1 (Drosophila) | EZH1         | 0.99654   | 651     |
| ENSGALT0000 enhancer of zeste homolog 2 (Drosophila) | EZH2         | 0.915336  | 1603.69 |
| ENSGALT0000 ezrin                                    | EZR          | 0.993374  | 3952.5  |
| ENSGALT0000 coagulation factor XI                    | F11          | ?         | 0       |
| ENSGALT0000 coagulation factor XIII, A1 polypeptide  | F13A1        | 0.982666  | 89.0001 |
| ENSGALT0000 coagulation factor XIII, B polypeptide   | F13B         | 0.541593  | 1       |
| ENSGALT0000 Uncharacterized protein                  | F1JYB3_CHICK | 0.779487  | 80      |
| ENSGALT0000 Uncharacterized protein                  | F1N816_CHICK | 0.944303  | 346.798 |
| ENSGALT0000 Uncharacterized protein                  | F1N8B7_CHICK | 1         | 0.5     |
| ENSGALT0000 Uncharacterized protein                  | F1N8J3_CHICK | 0.649519  | 0.5     |
| ENSGALT0000 Uncharacterized protein                  | F1N8T2_CHICK | 0.966495  | 329     |
| ENSGALT0000 Uncharacterized protein                  | F1N959_CHICK | 0.72751   | 1164.99 |
| ENSGALT0000 Uncharacterized protein                  | F1N960_CHICK | 0.978482  | 418     |
| ENSGALT0000 Uncharacterized protein                  | F1N970_CHICK | 0.827428  | 202     |
| ENSGALT0000 Uncharacterized protein                  | F1N976_CHICK | 0.584732  | 483     |
| ENSGALT0000 cholinergic receptor, nicotinic, alpha5  | F1N9F1_CHICK | 0.411685  | 8.5     |
| ENSGALT0000 mesotrypsin                              | F1N9P3_CHICK | ?         | 0       |
| ENSGALT0000 ribosomal protein S11                    | F1N9W9_CHICK | 0.229572  | 19222.8 |
| ENSGALT0000 Uncharacterized protein                  | F1NA57_CHICK | 0.6009    | 65.5    |
| ENSGALT0000 Uncharacterized protein                  | F1NA96_CHICK | 0.898846  | 7       |
| ENSGALT0000 Uncharacterized protein                  | F1NAF9_CHICK | 0.803414  | 762     |
| ENSGALT0000 Uncharacterized protein                  | F1NAR8_CHICK | 0.836537  | 16.5    |
| ENSGALT0000 Uncharacterized protein                  | F1NB70_CHICK | 0.895964  | 268.5   |
| ENSGALT0000 Uncharacterized protein                  | F1NB71_CHICK | 0.997872  | 702.004 |
| ENSGALT0000 Uncharacterized protein                  | F1NB91_CHICK | 0.649519  | 0       |
| ENSGALT0000 Uncharacterized protein                  | F1NB95_CHICK | 0.919102  | 373.5   |
| ENSGALT0000 Uncharacterized protein                  | F1NBC9_CHICK | 0.618893  | 88      |
| ENSGALT0000 Uncharacterized protein                  | F1NBD8_CHICK | 0.894944  | 111.5   |
| ENSGALT0000 Uncharacterized protein                  | F1NBH9_CHICK | 0.691982  | 3245.5  |
| ENSGALT0000 Uncharacterized protein                  | F1NBI8_CHICK | 0.853815  | 0.5     |
| ENSGALT0000 Uncharacterized protein                  | F1NBJ4_CHICK | 0.715398  | 25.5    |
| ENSGALT0000 Uncharacterized protein                  | F1NBZ7_CHICK | 0.932523  | 716.5   |
| ENSGALT0000 Uncharacterized protein                  | F1NC10_CHICK | 0.58761   | 118     |
| ENSGALT0000 Uncharacterized protein                  | F1NC59_CHICK | ?         | 0       |
| ENSGALT0000 Uncharacterized protein                  | F1NC89_CHICK | ?         | 0       |
| ENSGALT0000 Uncharacterized protein                  | F1NC99_CHICK | 0.907466  | 14.5    |
| ENSGALT0000 Uncharacterized protein                  | F1NCH5_CHICK | 0.965403  | 764     |
| ENSGALT0000 Uncharacterized protein                  | F1NCZ4_CHICK | 0.6556    | 119.312 |
| ENSGALT0000 Uncharacterized protein                  | F1ND04_CHICK | 0.862203  | 89.5    |
| ENSGALT0000 Uncharacterized protein                  | F1ND22_CHICK | 0.652645  | 35.5    |
| ENSGALT0000 Uncharacterized protein                  | F1ND50_CHICK | 0.853626  | 192     |
| ENSGALT0000 Uncharacterized protein                  | F1NDC2_CHICK | 0.369486  | 30612   |
| ENSGALT0000 Histone H2A                              | F1NDD7_CHICK | ?         | 0       |
| ENSGALT0000 Uncharacterized protein                  | F1NDD8_CHICK | 0.965414  | 132     |
| ENSGALT0000 Uncharacterized protein                  | F1NDZ1_CHICK | 0.0250946 | 0       |
| ENSGALT0000 Uncharacterized protein                  | F1NDZ2_CHICK | 0.906343  | 720.5   |
| ENSGALT0000 Uncharacterized protein                  | F1NE05_CHICK | 0.80321   | 3       |
| ENSGALT0000 Uncharacterized protein                  | F1NED2_CHICK | 0.527959  | 49.9039 |
| ENSGALT0000 Uncharacterized protein                  | F1NEF4_CHICK | 0.859077  | 7.5     |
| ENSGALT0000 Uncharacterized protein                  | F1NEN2_CHICK | 0.728939  | 4       |
| ENSGALT0000 Uncharacterized protein                  | F1NEP3_CHICK | 0.945857  | 70.5    |
| ENSGALT0000 Uncharacterized protein                  | F1NF72_CHICK | 0.0075117 | 26      |
| ENSGALT0000 Uncharacterized protein                  | F1NFA3_CHICK | 0.652277  | 142.5   |
| ENSGALT0000 Uncharacterized protein                  | F1NFA9_CHICK | 0.765637  | 29      |

|                                         |              |          |         |
|-----------------------------------------|--------------|----------|---------|
| ENSGALT0000 Uncharacterized protein     | F1NFB3_CHICK | 0.86458  | 6.92474 |
| ENSGALT0000 Uncharacterized protein     | F1NFE6_CHICK | 0.617941 | 0.5     |
| ENSGALT0000 Uncharacterized protein     | F1NFK7_CHICK | 0.840509 | 2.5     |
| ENSGALT0000 Uncharacterized protein     | F1NFP2_CHICK | 0.534404 | 1       |
| ENSGALT0000 Uncharacterized protein     | F1NFQ7_CHICK | 0.247014 | 8       |
| ENSGALT0000 Uncharacterized protein     | F1NFS8_CHICK | 0.87829  | 60.7946 |
| ENSGALT0000 Uncharacterized protein     | F1NFV0_CHICK | 0.783494 | 4       |
| ENSGALT0000 Uncharacterized protein     | F1NG65_CHICK | 0.288578 | 2.5     |
| ENSGALT0000 Uncharacterized protein     | F1NG68_CHICK | 0.836087 | 976     |
| ENSGALT0000 Uncharacterized protein     | F1NGF1_CHICK | 0.943569 | 725.5   |
| ENSGALT0000 Uncharacterized protein     | F1NGM5_CHICK | 0.996521 | 1512.5  |
| ENSGALT0000 Uncharacterized protein     | F1NGR3_CHICK | 0.699141 | 495.5   |
| ENSGALT0000 Uncharacterized protein     | F1NH45_CHICK | 0.93627  | 1179    |
| ENSGALT0000 Uncharacterized protein     | F1NH64_CHICK | 0.980291 | 1875.28 |
| ENSGALT0000 Uncharacterized protein     | F1NH77_CHICK | 0.73683  | 1       |
| ENSGALT0000 Condensin complex subunit 1 | F1NH88_CHICK | 0.924321 | 2661    |
| ENSGALT0000 Uncharacterized protein     | F1NHB8_CHICK | 0.805801 | 6.2526  |
| ENSGALT0000 Uncharacterized protein     | F1NHK1_CHICK | 0.904804 | 1       |
| ENSGALT0000 Uncharacterized protein     | F1NHT9_CHICK | 0.907459 | 231     |
| ENSGALT0000 Uncharacterized protein     | F1NHU4_CHICK | 0.549712 | 2.5     |
| ENSGALT0000 Uncharacterized protein     | F1NHU5_CHICK | 0.946033 | 1022.94 |
| ENSGALT0000 Uncharacterized protein     | F1NHV5_CHICK | 0.982525 | 763.312 |
| ENSGALT0000 Uncharacterized protein     | F1NHZ1_CHICK | 0.291382 | 6.5     |
| ENSGALT0000 Uncharacterized protein     | F1NI78_CHICK | 0.455615 | 1       |
| ENSGALT0000 Uncharacterized protein     | F1NI80_CHICK | 0.741148 | 14.7912 |
| ENSGALT0000 Uncharacterized protein     | F1NI81_CHICK | 0.951204 | 444.501 |
| ENSGALT0000 Uncharacterized protein     | F1NIE1_CHICK | 0.777991 | 1086.5  |
| ENSGALT0000 Uncharacterized protein     | F1NII2_CHICK | 0.812206 | 35.5    |
| ENSGALT0000 Uncharacterized protein     | F1NIK4_CHICK | 0.459217 | 20040   |
| ENSGALT0000 Uncharacterized protein     | F1NIP1_CHICK | 0.998357 | 39.5    |
| ENSGALT0000 Uncharacterized protein     | F1NIQ9_CHICK | 0.88517  | 4872.58 |
| ENSGALT0000 Uncharacterized protein     | F1NIU7_CHICK | 0.914219 | 17.5    |
| ENSGALT0000 Uncharacterized protein     | F1NJ62_CHICK | 0.958173 | 523.5   |
| ENSGALT0000 Uncharacterized protein     | F1NJ65_CHICK | 0.759472 | 3.5     |
| ENSGALT0000 Uncharacterized protein     | F1NJE0_CHICK | 0.962307 | 596.906 |
| ENSGALT0000 Uncharacterized protein     | F1NJQ0_CHICK | 0.864612 | 112.5   |
| ENSGALT0000 Uncharacterized protein     | F1NJX5_CHICK | 0.987899 | 45      |
| ENSGALT0000 Uncharacterized protein     | F1NK17_CHICK | 0.988645 | 12.5    |
| ENSGALT0000 Uncharacterized protein     | F1NK21_CHICK | 0.953196 | 29      |
| ENSGALT0000 Uncharacterized protein     | F1NK63_CHICK | 0.710836 | 154     |
| ENSGALT0000 Uncharacterized protein     | F1NK64_CHICK | 0.846939 | 3.5     |
| ENSGALT0000 Uncharacterized protein     | F1NKE5_CHICK | 0.884738 | 54.9676 |
| ENSGALT0000 Uncharacterized protein     | F1NKF8_CHICK | 0.838784 | 88.5361 |
| ENSGALT0000 Uncharacterized protein     | F1NKH4_CHICK | 0.902922 | 238     |
| ENSGALT0000 Uncharacterized protein     | F1NKJ6_CHICK | 0.909347 | 61      |
| ENSGALT0000 Iodothyronine deiodinase    | F1NKJ9_CHICK | 0.725779 | 11      |
| ENSGALT0000 Uncharacterized protein     | F1NL93_CHICK | 0.696461 | 6       |
| ENSGALT0000 Uncharacterized protein     | F1NLA4_CHICK | 0.071141 | 9.5     |
| ENSGALT0000 Uncharacterized protein     | F1NLE5_CHICK | 0.814178 | 672     |
| ENSGALT0000 Uncharacterized protein     | F1NLG8_CHICK | 0.704456 | 927.478 |
| ENSGALT0000 Beta-galactosidase          | F1NLL2_CHICK | 0.845192 | 1044    |
| ENSGALT0000 Uncharacterized protein     | F1NLN2_CHICK | ?        | 0       |
| ENSGALT0000 Uncharacterized protein     | F1NLP6_CHICK | 0.995932 | 12      |
| ENSGALT0000 ribosomal protein L3        | F1NLW1_CHICK | 0.918481 | 45604.6 |
| ENSGALT0000 Uncharacterized protein     | F1NM01_CHICK | ?        | 0       |
| ENSGALT0000 Uncharacterized protein     | F1NM53_CHICK | 0.933361 | 354.5   |

|                                                   |              |          |         |
|---------------------------------------------------|--------------|----------|---------|
| ENSGALT0000 Uncharacterized protein               | F1NM61_CHICK | 0.75527  | 325.5   |
| ENSGALT0000 Uncharacterized protein               | F1NM79_CHICK | 0.306699 | 167.865 |
| ENSGALT0000 Uncharacterized protein               | F1NMD1_CHICK | 0.900308 | 43      |
| ENSGALT0000 Uncharacterized protein               | F1NMD9_CHICK | 0.866351 | 17.5    |
| ENSGALT0000 Uncharacterized protein               | F1NMF8_CHICK | 0.854951 | 240     |
| ENSGALT0000 Uncharacterized protein               | F1NMG1_CHICK | 0.464758 | 0       |
| ENSGALT0000 Uncharacterized protein               | F1NMH0_CHICK | 0.634144 | 2.89236 |
| ENSGALT0000 Uncharacterized protein               | F1NMV5_CHICK | 0.976844 | 3864.96 |
| ENSGALT0000 Uncharacterized protein               | F1NMW8_CHICK | 0.827574 | 380.5   |
| ENSGALT0000 Uncharacterized protein               | F1NN37_CHICK | 0.957751 | 3457.43 |
| ENSGALT0000 Transporter                           | F1NN76_CHICK | 0.940119 | 242     |
| ENSGALT0000 Uncharacterized protein               | F1NNI9_CHICK | 0.769664 | 10      |
| ENSGALT0000 Uncharacterized protein               | F1NNL2_CHICK | 0.650557 | 2.5     |
| ENSGALT0000 Uncharacterized protein               | F1NNM8_CHICK | 0.957652 | 11716   |
| ENSGALT0000 Uncharacterized protein               | F1NNP5_CHICK | ?        | 0       |
| ENSGALT0000 Uricase                               | F1NNW3_CHICK | 0.934459 | 4.5     |
| ENSGALT0000 Uncharacterized protein               | F1NNZ5_CHICK | 0.631223 | 1       |
| ENSGALT0000 Uncharacterized protein               | F1NP01_CHICK | 0.846336 | 1.5     |
| ENSGALT0000 Protein Wnt                           | F1NP78_CHICK | 0.603682 | 1       |
| ENSGALT0000 Uncharacterized protein               | F1NPD4_CHICK | ?        | 0       |
| ENSGALT0000 Transporter                           | F1NPI2_CHICK | 1        | 1       |
| ENSGALT0000 Uncharacterized protein               | F1NPR7_CHICK | 0.507482 | 100.87  |
| ENSGALT0000 Iodothyronine deiodinase              | F1NPW0_CHICK | 0.924492 | 19      |
| ENSGALT0000 Ubiquitin carboxyl-terminal hydrolase | F1NPW7_CHICK | 0.975677 | 541.5   |
| ENSGALT0000 Uncharacterized protein               | F1NPY3_CHICK | 0.781708 | 14.5    |
| ENSGALT0000 Uncharacterized protein               | F1NQ59_CHICK | 0.21609  | 38      |
| ENSGALT0000 Uncharacterized protein               | F1NQ65_CHICK | 0.814116 | 259.5   |
| ENSGALT0000 Ribosomal protein L15                 | F1NQG5_CHICK | 0.30027  | 53213.4 |
| ENSGALT0000 Uncharacterized protein               | F1NQQ1_CHICK | 0.96121  | 146     |
| ENSGALT0000 Ribosomal protein                     | F1NQQ6_CHICK | 0.758224 | 336.341 |
| ENSGALT0000 Uncharacterized protein               | F1NR28_CHICK | 0.947429 | 153.5   |
| ENSGALT0000 Uncharacterized protein               | F1NRI8_CHICK | 0.741717 | 597.5   |
| ENSGALT0000 Uncharacterized protein               | F1NRN6_CHICK | 0.973596 | 633.918 |
| ENSGALT0000 Uncharacterized protein               | F1NRR7_CHICK | 0.660925 | 2.5     |
| ENSGALT0000 Uncharacterized protein               | F1NRX7_CHICK | 0.947047 | 157     |
| ENSGALT0000 Transporter                           | F1NS02_CHICK | 0.695795 | 113.5   |
| ENSGALT0000 Uncharacterized protein               | F1NS15_CHICK | 0.649519 | 0       |
| ENSGALT0000 Uncharacterized protein               | F1NS90_CHICK | ?        | 0       |
| ENSGALT0000 Uncharacterized protein               | F1NS92_CHICK | 0.464758 | 0       |
| ENSGALT0000 Uncharacterized protein               | F1NS99_CHICK | 0.946455 | 5       |
| ENSGALT0000 Uncharacterized protein               | F1NSE5_CHICK | 0.494775 | 67.5    |
| ENSGALT0000 Uncharacterized protein               | F1NSJ0_CHICK | 0.591376 | 1       |
| ENSGALT0000 Uncharacterized protein               | F1NSS4_CHICK | 0.914188 | 2044    |
| ENSGALT0000 P2X purinoceptor                      | F1NSV8_CHICK | 0.434081 | 4       |
| ENSGALT0000 Uncharacterized protein               | F1NSW4_CHICK | 0.742357 | 969.5   |
| ENSGALT0000 Uncharacterized protein               | F1NT07_CHICK | 0.914662 | 30.7474 |
| ENSGALT0000 Uncharacterized protein               | F1NT47_CHICK | 0.922518 | 434.5   |
| ENSGALT0000 Uncharacterized protein               | F1NT59_CHICK | ?        | 0       |
| ENSGALT0000 Uncharacterized protein               | F1NTI2_CHICK | 0.689337 | 8       |
| ENSGALT0000 Uncharacterized protein               | F1NTK9_CHICK | 0.853301 | 2419.5  |
| ENSGALT0000 Uncharacterized protein               | F1NTP6_CHICK | 0.921654 | 1379    |
| ENSGALT0000 Caveolin                              | F1NTW2_CHICK | 0.948473 | 22.5    |
| ENSGALT0000 Uncharacterized protein               | F1NU82_CHICK | 0.627549 | 51      |
| ENSGALT0000 Uncharacterized protein               | F1NUE7_CHICK | 0.963916 | 281     |
| ENSGALT0000 Uncharacterized protein               | F1NUF1_CHICK | 0.947731 | 107.677 |
| ENSGALT0000 Uncharacterized protein               | F1NV35_CHICK | 0.944103 | 99.5    |

|                                                |              |           |         |
|------------------------------------------------|--------------|-----------|---------|
| ENSGALT0000 Uncharacterized protein            | F1NV81_CHICK | 0.971669  | 35.5    |
| ENSGALT0000 Uncharacterized protein            | F1NVC7_CHICK | 0.667952  | 22.5    |
| ENSGALT0000 Uncharacterized protein            | F1NVF2_CHICK | 0.972163  | 305.5   |
| ENSGALT0000 Uncharacterized protein            | F1NVI2_CHICK | 0.724782  | 7.5     |
| ENSGALT0000 Protein Wnt                        | F1NVM5_CHICK | 0.0113846 | 1.5     |
| ENSGALT0000 homeodomain protein                | F1NVN6_CHICK | 0.462455  | 18.4837 |
| ENSGALT0000 Uncharacterized protein            | F1NVV1_CHICK | 0.701917  | 7.5     |
| ENSGALT0000 Uncharacterized protein            | F1NW53_CHICK | 0.947727  | 744.998 |
| ENSGALT0000 Uncharacterized protein            | F1NW54_CHICK | 0.992971  | 82      |
| ENSGALT0000 Uncharacterized protein            | F1NW72_CHICK | 0.671459  | 741     |
| ENSGALT0000 Uncharacterized protein            | F1NW97_CHICK | 0.264439  | 123429  |
| ENSGALT0000 Uncharacterized protein            | F1NWE7_CHICK | 0.771892  | 156     |
| ENSGALT0000 Uncharacterized protein            | F1NWS2_CHICK | 0.873131  | 123.5   |
| ENSGALT0000 Uncharacterized protein            | F1NWU8_CHICK | 0.464758  | 1       |
| ENSGALT0000 Uncharacterized protein            | F1NWX5_CHICK | ?         | 0       |
| ENSGALT0000 Uncharacterized protein            | F1NX43_CHICK | 0.652877  | 302.5   |
| ENSGALT0000 Uncharacterized protein            | F1NXB3_CHICK | 0.783494  | 4       |
| ENSGALT0000 Uncharacterized protein            | F1NXK7_CHICK | ?         | 0       |
| ENSGALT0000 Uncharacterized protein            | F1NXY6_CHICK | 0.312833  | 1106    |
| ENSGALT0000 Uncharacterized protein            | F1NXZ1_CHICK | 0.898074  | 3623    |
| ENSGALT0000 Glutathione peroxidase             | F1NYB0_CHICK | 0.890633  | 47.5    |
| ENSGALT0000 Uncharacterized protein            | F1NYH7_CHICK | 0.462597  | 28      |
| ENSGALT0000 Uncharacterized protein            | F1NYS7_CHICK | 0.996506  | 567.5   |
| ENSGALT0000 Gap junction protein               | F1NYX4_CHICK | 0.834221  | 19.5501 |
| ENSGALT0000 Uncharacterized protein            | F1NYX6_CHICK | 0.0898817 | 10      |
| ENSGALT0000 Uncharacterized protein            | F1NYX8_CHICK | 0.948106  | 57.5    |
| ENSGALT0000 Uncharacterized protein            | F1NZ25_CHICK | 0.953163  | 7332.5  |
| ENSGALT0000 Uncharacterized protein            | F1NZ97_CHICK | 0.685935  | 2       |
| ENSGALT0000 Alkaline phosphatase               | F1NZG4_CHICK | 0.710687  | 24.5    |
| ENSGALT0000 Uncharacterized protein            | F1NZH9_CHICK | 0.869046  | 362     |
| ENSGALT0000 Uncharacterized protein            | F1NZK5_CHICK | 0.488992  | 58.5    |
| ENSGALT0000 Uncharacterized protein            | F1NZL8_CHICK | 0.164344  | 1.00418 |
| ENSGALT0000 Uncharacterized protein            | F1NZW6_CHICK | 0.560837  | 19      |
| ENSGALT0000 Uncharacterized protein            | F1NZW8_CHICK | 0.961437  | 640     |
| ENSGALT0000 Uncharacterized protein            | F1NZX2_CHICK | 0.98531   | 397     |
| ENSGALT0000 Uncharacterized protein            | F1P0D2_CHICK | 0.98493   | 72      |
| ENSGALT0000 Uncharacterized protein            | F1P0G0_CHICK | 0.992472  | 1366.5  |
| ENSGALT0000 Uncharacterized protein            | F1P0G3_CHICK | 0.910448  | 333.5   |
| ENSGALT0000 Uncharacterized protein            | F1P0H2_CHICK | 0.489324  | 2.5     |
| ENSGALT0000 Uncharacterized protein            | F1P0K6_CHICK | 0.822069  | 51.5    |
| ENSGALT0000 Uncharacterized protein            | F1P0Q5_CHICK | 0.921027  | 22.5    |
| ENSGALT0000 Uncharacterized protein            | F1P0R9_CHICK | 0.34567   | 59      |
| ENSGALT0000 Uncharacterized protein            | F1P0W4_CHICK | 0.828219  | 8067    |
| ENSGALT0000 Uncharacterized protein            | F1P101_CHICK | 0.717565  | 26      |
| ENSGALT0000 Uncharacterized protein            | F1P102_CHICK | 0.845659  | 42.5    |
| ENSGALT0000 Uncharacterized protein            | F1P106_CHICK | 0.804137  | 28      |
| ENSGALT0000 Uncharacterized protein            | F1P132_CHICK | 0.914122  | 597.5   |
| ENSGALT0000 Uncharacterized protein            | F1P146_CHICK | 0.731851  | 0.5378  |
| ENSGALT0000 Uncharacterized protein            | F1P150_CHICK | 0.91151   | 6075.97 |
| ENSGALT0000 Uncharacterized protein            | F1P1H8_CHICK | 0.845143  | 6       |
| ENSGALT0000 Uncharacterized protein            | F1P1I5_CHICK | 0.718101  | 693.5   |
| ENSGALT0000 Uncharacterized protein            | F1P1J2_CHICK | 0.976035  | 1784    |
| ENSGALT0000 Uncharacterized protein            | F1P1L4_CHICK | 0.890685  | 152.5   |
| ENSGALT0000 ATP-binding cassette, sub-family C | F1P204_CHICK | 0.988     | 1639    |
| ENSGALT0000 SUMO-1 activating enzyme subunit   | F1P226_CHICK | 0.962943  | 2602.98 |
| ENSGALT0000 Uncharacterized protein            | F1P2C9_CHICK | 0.647449  | 123.5   |

|                                                                          |              |           |         |
|--------------------------------------------------------------------------|--------------|-----------|---------|
| ENSGALT0000 Uncharacterized protein                                      | F1P2F8_CHICK | 0.965542  | 148.5   |
| ENSGALT0000 Adenylyl cyclase-associated protein                          | F1P2G4_CHICK | 0.957234  | 4333    |
| ENSGALT0000 Uncharacterized protein                                      | F1P2H1_CHICK | 0.944395  | 1268.78 |
| ENSGALT0000 Uncharacterized protein                                      | F1P2L2_CHICK | 0.780166  | 29      |
| ENSGALT0000 Uncharacterized protein                                      | F1P2S6_CHICK | 0.678459  | 72.5    |
| ENSGALT0000 Uncharacterized protein                                      | F1P2U0_CHICK | 0.639897  | 7       |
| ENSGALT0000 Uncharacterized protein                                      | F1P2U1_CHICK | 0.967184  | 567     |
| ENSGALT0000 Uncharacterized protein                                      | F1P342_CHICK | 0.770722  | 48.5    |
| ENSGALT0000 Uncharacterized protein                                      | F1P380_CHICK | 0.649519  | 1       |
| ENSGALT0000 Nucleoside diphosphate kinase                                | F1P3E1_CHICK | 0.786301  | 1216.5  |
| ENSGALT0000 Uncharacterized protein                                      | F1P3H6_CHICK | 0.509041  | 39.5    |
| ENSGALT0000 Uncharacterized protein                                      | F1P3N2_CHICK | 0.222799  | 5709.61 |
| ENSGALT0000 Pseudouridine synthase                                       | F1P3X5_CHICK | 0.903317  | 577.669 |
| ENSGALT0000 Uncharacterized protein                                      | F1P450_CHICK | 0.934312  | 5.5     |
| ENSGALT0000 Uncharacterized protein                                      | F1P492_CHICK | ?         | 0       |
| ENSGALT0000 Uncharacterized protein                                      | F1P4G4_CHICK | 0.976698  | 69      |
| ENSGALT0000 Uncharacterized protein                                      | F1P4H2_CHICK | 0.850856  | 23.5    |
| ENSGALT0000 Uncharacterized protein                                      | F1P4K3_CHICK | 0.933887  | 803.5   |
| ENSGALT0000 Uncharacterized protein                                      | F1P4U7_CHICK | ?         | 0       |
| ENSGALT0000 Uncharacterized protein                                      | F1P4V0_CHICK | 0.464758  | 0       |
| ENSGALT0000 Uncharacterized protein                                      | F1P4V2_CHICK | 0.603682  | 1       |
| ENSGALT0000 Uncharacterized protein                                      | F1P4W0_CHICK | 0.777137  | 1246    |
| ENSGALT0000 Uncharacterized protein                                      | F1P546_CHICK | 0.563672  | 18      |
| ENSGALT0000 Uncharacterized protein                                      | F1P5B4_CHICK | 0.884163  | 1801.32 |
| ENSGALT0000 Uncharacterized protein                                      | F1P5E3_CHICK | 0.016655  | 3.5     |
| ENSGALT0000 Uncharacterized protein                                      | F1P5J3_CHICK | 0.833597  | 12.6006 |
| ENSGALT0000 Uncharacterized protein                                      | F1P5Q6_CHICK | 0.896785  | 392     |
| ENSGALT0000 coagulation factor II (thrombin)                             | F2           | 0.9763    | 60.5    |
| ENSGALT0000 coagulation factor II (thrombin) receptor                    | F2RL1        | 0.94416   | 998.5   |
| ENSGALT0000 coagulation factor II (thrombin) receptor                    | F2RL2        | 0.931865  | 159.5   |
| ENSGALT0000 coagulation factor III (thromboplastin)                      | F3           | 0.92552   | 510     |
| ENSGALT0000 coagulation factor V (proaccelerin, proconvertin)            | F5           | 0.995293  | 412.501 |
| ENSGALT0000 Uncharacterized protein                                      | F6VFN9_CHICK | 1         | 0.5     |
| ENSGALT0000 coagulation factor VII (serum prothrombin converting enzyme) | F7           | 0.407108  | 5       |
| ENSGALT0000 coagulation factor VIII, procoagulant                        | F8           | 0.979137  | 61      |
| ENSGALT0000 coagulation factor IX                                        | F9           | 0.0624122 | 0.5     |
| ENSGALT0000 fatty acid 2-hydroxylase                                     | FA2H         | 0.971357  | 200.5   |
| ENSGALT0000 fatty acid amide hydrolase                                   | FAAH         | 0.879691  | 908.5   |
| ENSGALT0000 fatty acid binding protein 1, liver                          | FABP1        | 0.464758  | 0       |
| ENSGALT0000 fatty acid binding protein 2, intestine                      | FABP2        | 0.603682  | 2       |
| ENSGALT0000 fatty acid binding protein 3, muscle                         | FABP3        | 0.630882  | 687.503 |
| ENSGALT0000 fatty acid binding protein 4, adipocytes                     | FABP4        | 0.0483637 | 0       |
| ENSGALT0000 fatty acid binding protein 5 (psoriasis)                     | FABP5        | 0.264606  | 501.5   |
| ENSGALT0000 fatty acid binding protein 6, ileal                          | FABP6        | 0.982054  | 56.5    |
| ENSGALT0000 fatty acid binding protein 7, brain                          | FABP7        | 0.26097   | 1005.5  |
| ENSGALT0000 Fas (TNFRSF6)-associated via death domain                    | FADD         | 0.978194  | 441     |
| ENSGALT0000 fatty acid desaturase 1                                      | FADS1        | 0.794828  | 1102    |
| ENSGALT0000 fatty acid desaturase 2                                      | FADS2        | 0.908226  | 2833.5  |
| ENSGALT0000 fatty acid desaturase domain family                          | FADS6        | 0.720731  | 30.5    |
| ENSGALT0000 Fas (TNFRSF6) associated factor 1                            | FAF1         | 0.922984  | 844     |
| ENSGALT0000 Fas associated factor family member                          | FAF2         | 0.889808  | 1746    |
| ENSGALT0000 fumarylacetoacetate hydrolase (functional)                   | FAH          | 0.928758  | 8       |
| ENSGALT0000 fumarylacetoacetate hydrolase donor                          | FAHD1        | 0.895674  | 362     |
| ENSGALT0000 Fas apoptotic inhibitory molecule 1                          | FAIM         | 0.973653  | 284.5   |
| ENSGALT0000 Fas apoptotic inhibitory molecule 2                          | FAIM2        | 0.815863  | 316.5   |
| ENSGALT0000 family with sequence similarity 100                          | FAM100A      | 0.768554  | 445.643 |

|                                                 |          |          |         |
|-------------------------------------------------|----------|----------|---------|
| ENSGALT0000 family with sequence similarity 100 | FAM100B  | 0.402996 | 761     |
| ENSGALT0000 family with sequence similarity 101 | FAM101A  | 0.846317 | 172     |
| ENSGALT0000 family with sequence similarity 101 | FAM101B  | 0.945566 | 383     |
| ENSGALT0000 family with sequence similarity 102 | FAM102A  | 0.989695 | 564.5   |
| ENSGALT0000 family with sequence similarity 102 | FAM102B  | 0.797096 | 129.755 |
| ENSGALT0000 family with sequence similarity 103 | FAM103A1 | 0.951576 | 255.5   |
| ENSGALT0000 family with sequence similarity 104 | FAM104A  | 0.970493 | 1219.41 |
| ENSGALT0000 family with sequence similarity 105 | FAM105A  | 0.998136 | 698.497 |
| ENSGALT0000 family with sequence similarity 105 | FAM105B  | 0.969942 | 129     |
| ENSGALT0000 family with sequence similarity 107 | FAM107A  | 0.80886  | 12      |
| ENSGALT0000 family with sequence similarity 107 | FAM107B  | 0.921018 | 151     |
| ENSGALT0000 family with sequence similarity 108 | FAM108A1 | 0.915241 | 1990    |
| ENSGALT0000 family with sequence similarity 108 | FAM108B1 | 0.974267 | 906.5   |
| ENSGALT0000 family with sequence similarity 108 | FAM108C1 | 0.930001 | 1370.5  |
| ENSGALT0000 family with sequence similarity 109 | FAM109A  | 0.778358 | 196.771 |
| ENSGALT0000 family with sequence similarity 109 | FAM109B  | 0.937197 | 898.729 |
| ENSGALT0000 family with sequence similarity 110 | FAM110B  | 0.90768  | 655     |
| ENSGALT0000 family with sequence similarity 110 | FAM110C  | 0.873575 | 897.5   |
| ENSGALT0000 family with sequence similarity 110 | FAM110D  | 0.776213 | 136.5   |
| ENSGALT0000 family with sequence similarity 114 | FAM114A1 | 0.913391 | 269.5   |
| ENSGALT0000 family with sequence similarity 114 | FAM114A2 | 0.969283 | 656     |
| ENSGALT0000 family with sequence similarity 116 | FAM116A  | 0.974275 | 882     |
| ENSGALT0000 family with sequence similarity 116 | FAM116B  | 0.98235  | 967.5   |
| ENSGALT0000 family with sequence similarity 117 | FAM117A  | 0.995955 | 593.5   |
| ENSGALT0000 family with sequence similarity 117 | FAM117B  | 0.942445 | 310     |
| ENSGALT0000 family with sequence similarity 118 | FAM118B  | 0.942174 | 930.5   |
| ENSGALT0000 family with sequence similarity 120 | FAM120A  | 0.958985 | 4945.14 |
| ENSGALT0000 family with sequence similarity 120 | FAM120B  | 0.968127 | 285.5   |
| ENSGALT0000 protein FAM122A                     | FAM122A  | 0.980773 | 2413.65 |
| ENSGALT0000 family with sequence similarity 122 | FAM122B  | 0.939286 | 1197.88 |
| ENSGALT0000 family with sequence similarity 123 | FAM123A  | 0.976825 | 862     |
| ENSGALT0000 family with sequence similarity 123 | FAM123B  | 0.995443 | 674.5   |
| ENSGALT0000 family with sequence similarity 124 | FAM124B  | 0.921002 | 4.5     |
| ENSGALT0000 hypothetical protein LOC426089      | FAM125A  | 0.952113 | 1305.25 |
| ENSGALT0000 family with sequence similarity 125 | FAM125B  | 0.889296 | 3426.13 |
| ENSGALT0000 family with sequence similarity 126 | FAM126A  | 0.799903 | 949     |
| ENSGALT0000 family with sequence similarity 126 | FAM126B  | 0.979584 | 173     |
| ENSGALT0000 family with sequence similarity 129 | FAM129A  | 0.977436 | 855     |
| ENSGALT0000 family with sequence similarity 129 | FAM129B  | 0.925045 | 1556.5  |
| ENSGALT0000 family with sequence similarity 131 | FAM131A  | 0.701567 | 36      |
| ENSGALT0000 family with sequence similarity 131 | FAM131B  | 0.992443 | 517.5   |
| ENSGALT0000 family with sequence similarity 132 | FAM132A  | 0.89681  | 130     |
| ENSGALT0000 protein FAM133                      | FAM133   | 0.945399 | 456.001 |
| ENSGALT0000 family with sequence similarity 134 | FAM134A  | 0.900769 | 4153.16 |
| ENSGALT0000 family with sequence similarity 134 | FAM134B  | 0.888835 | 543     |
| ENSGALT0000 family with sequence similarity 134 | FAM134C  | 0.943984 | 1100.5  |
| ENSGALT0000 family with sequence similarity 135 | FAM135A  | 0.999224 | 2108.97 |
| ENSGALT0000 family with sequence similarity 135 | FAM135B  | 0.971039 | 35      |
| ENSGALT0000 family with sequence similarity 136 | FAM136A  | 0.136455 | 5248.07 |
| ENSGALT0000 family with sequence similarity 13  | FAM13A   | 0.959894 | 215.847 |
| ENSGALT0000 family with sequence similarity 13  | FAM13C   | 0.706199 | 9.5     |
| ENSGALT0000 family with sequence similarity 149 | FAM149A  | 0.902302 | 53      |
| ENSGALT0000 family with sequence similarity 149 | FAM149B1 | 0.967248 | 977     |
| ENSGALT0000 family with sequence similarity 150 | FAM150B  | 0.942268 | 18.5    |
| ENSGALT0000 family with sequence similarity 151 | FAM151B  | 0.984779 | 1074.5  |
| ENSGALT0000 family with sequence similarity 154 | FAM154B  | 0.954417 | 29      |



|                                                 |          |          |         |
|-------------------------------------------------|----------|----------|---------|
| ENSGALT0000 family with sequence similarity 155 | FAM155A  | 0.798855 | 8       |
| ENSGALT0000 family with sequence similarity 155 | FAM155B  | 0.940043 | 700.502 |
| ENSGALT0000 family with sequence similarity 159 | FAM159A  | 0.95556  | 13      |
| ENSGALT0000 family with sequence similarity 160 | FAM160A1 | 0.948815 | 210     |
| ENSGALT0000 family with sequence similarity 160 | FAM160A2 | 0.908748 | 1879.49 |
| ENSGALT0000 family with sequence similarity 160 | FAM160B1 | 0.966208 | 679     |
| ENSGALT0000 family with sequence similarity 161 | FAM161A  | 0.997241 | 70      |
| ENSGALT0000 family with sequence similarity 161 | FAM161B  | 0.997482 | 231     |
| ENSGALT0000 family with sequence similarity 162 | FAM162A  | 0.826856 | 931.5   |
| ENSGALT0000 family with sequence similarity 162 | FAM162B  | ?        | 0       |
| ENSGALT0000 family with sequence similarity 163 | FAM163A  | 0.532091 | 21      |
| ENSGALT0000 family with sequence similarity 164 | FAM164A  | 0.903655 | 237.5   |
| ENSGALT0000 family with sequence similarity 164 | FAM164C  | 0.997017 | 86.7169 |
| ENSGALT0000 family with sequence similarity 165 | FAM165A  | 0.995542 | 31.5    |
| ENSGALT0000 family with sequence similarity 166 | FAM166A  | 0.579551 | 3       |
| ENSGALT0000 family with sequence similarity 167 | FAM167A  | 0.95977  | 75      |
| ENSGALT0000 family with sequence similarity 167 | FAM167B  | 0.98894  | 22.5    |
| ENSGALT0000 family with sequence similarity 168 | FAM168A  | 0.977524 | 1001.5  |
| ENSGALT0000 family with sequence similarity 168 | FAM168B  | 0.955055 | 1236.5  |
| ENSGALT0000 family with sequence similarity 169 | FAM169A  | 0.982047 | 445     |
| ENSGALT0000 family with sequence similarity 169 | FAM169B  | 0.894106 | 93      |
| ENSGALT0000 family with sequence similarity 171 | FAM171A1 | 0.976948 | 2723    |
| ENSGALT0000 family with sequence similarity 171 | FAM171B  | 0.841425 | 859     |
| ENSGALT0000 family with sequence similarity 172 | FAM172A  | 0.864458 | 1118.5  |
| ENSGALT0000 family with sequence similarity 173 | FAM173A  | 0.916626 | 366     |
| ENSGALT0000 family with sequence similarity 173 | FAM173B  | 0.965654 | 97.5    |
| ENSGALT0000 family with sequence similarity 174 | FAM174A  | 0.353792 | 1279.02 |
| ENSGALT0000 family with sequence similarity 175 | FAM175A  | 0.974352 | 604.188 |
| ENSGALT0000 hypothetical protein LOC423954      | Fam175b  | 0.966541 | 522.999 |
| ENSGALT0000 family with sequence similarity 176 | FAM176A  | 0.982233 | 66.5    |
| ENSGALT0000 family with sequence similarity 176 | FAM176B  | 0.39995  | 60.5    |
| ENSGALT0000 family with sequence similarity 177 | FAM177A1 | 0.8749   | 1419.5  |
| ENSGALT0000 family with sequence similarity 178 | FAM178A  | 0.961883 | 542     |
| ENSGALT0000 family with sequence similarity 178 | FAM178B  | 0.600762 | 8       |
| ENSGALT0000 family with sequence similarity 179 | FAM179A  | 0.945488 | 10.5    |
| ENSGALT0000 family with sequence similarity 179 | FAM179B  | 0.992902 | 990.881 |
| ENSGALT0000 family with sequence similarity 180 | FAM180A  | 0.464758 | 0       |
| ENSGALT0000 family with sequence similarity 181 | FAM181B  | 0.651249 | 287.5   |
| ENSGALT0000 family with sequence similarity 183 | FAM183A  | 0.79697  | 60.5    |
| ENSGALT0000 family with sequence similarity 184 | FAM184A  | 0.893199 | 198     |
| ENSGALT0000 family with sequence similarity 184 | FAM184B  | 0.823716 | 36      |
| ENSGALT0000 family with sequence similarity 185 | FAM185A  | 0.970148 | 199     |
| ENSGALT0000 family with sequence similarity 187 | FAM187A  | 0.603682 | 0       |
| ENSGALT0000 family with sequence similarity 188 | FAM188A  | 0.878488 | 670.5   |
| ENSGALT0000 family with sequence similarity 188 | FAM188B  | 0.93165  | 213     |
| ENSGALT0000 family with sequence similarity 188 | FAM188B2 | 0.559691 | 18.5    |
| ENSGALT0000 family with sequence similarity 189 | FAM189A1 | 0.974759 | 407.5   |
| ENSGALT0000 family with sequence similarity 189 | FAM189A2 | 0.662034 | 154     |
| ENSGALT0000 family with sequence similarity 18, | FAM18A   | 0.689558 | 54      |
| ENSGALT0000 family with sequence similarity 18, | FAM18B1  | 0.949534 | 3186    |
| ENSGALT0000 family with sequence similarity 190 | FAM190A  | 0.995779 | 53.5    |
| ENSGALT0000 family with sequence similarity 190 | FAM190B  | 0.866754 | 283.5   |
| ENSGALT0000 family with sequence similarity 192 | FAM192A  | 0.879116 | 1739    |
| ENSGALT0000 family with sequence similarity 193 | FAM193A  | 0.934077 | 1191.5  |
| ENSGALT0000 family with sequence similarity 193 | FAM193B  | 0.906166 | 2293.5  |
| ENSGALT0000 family with sequence similarity 194 | FAM194A  | 0.991024 | 7.5     |

|                                                  |         |          |         |
|--------------------------------------------------|---------|----------|---------|
| ENSGALT0000 family with sequence similarity 194  | FAM194B | ?        | 0       |
| ENSGALT0000 family with sequence similarity 195  | FAM195A | 0.326338 | 167     |
| ENSGALT0000 family with sequence similarity 196  | FAM196A | 0.789615 | 40.5    |
| ENSGALT0000 family with sequence similarity 196  | FAM196B | 1        | 0.5     |
| ENSGALT0000 family with sequence similarity 198  | FAM198A | 0.624335 | 62.5    |
| ENSGALT0000 family with sequence similarity 198  | FAM198B | 0.844734 | 37      |
| ENSGALT0000 family with sequence similarity 199  | FAM199X | 0.94671  | 373     |
| ENSGALT0000 family with sequence similarity 19 ( | FAM19A1 | 0.796267 | 9.5     |
| ENSGALT0000 family with sequence similarity 19 ( | FAM19A2 | 0.731519 | 23.5    |
| ENSGALT0000 family with sequence similarity 19 ( | FAM19A3 | 0.976013 | 108.5   |
| ENSGALT0000 family with sequence similarity 19 ( | FAM19A4 | 0.484026 | 90.5    |
| ENSGALT0000 family with sequence similarity 19 ( | FAM19A5 | 0.78131  | 20.5    |
| ENSGALT0000 family with sequence similarity 204  | FAM204A | 0.77641  | 717.5   |
| ENSGALT0000 family with sequence similarity 206  | FAM206A | 0.869011 | 532.998 |
| ENSGALT0000 family with sequence similarity 207  | FAM207A | 0.740617 | 631.5   |
| ENSGALT0000 family with sequence similarity 208  | FAM208A | 0.983414 | 1381.5  |
| ENSGALT0000 family with sequence similarity 208  | FAM208B | 0.979831 | 1674.5  |
| ENSGALT0000 family with sequence similarity 20,  | FAM20A  | 0.868568 | 296.5   |
| ENSGALT0000 family with sequence similarity 20,  | FAM20B  | 0.990704 | 2328.5  |
| ENSGALT0000 family with sequence similarity 20,  | FAM20C  | 0.776681 | 745     |
| ENSGALT0000 chromosome 2 open reading frame      | FAM210A | 0.996722 | 554.5   |
| ENSGALT0000 family with sequence similarity 212  | FAM212B | 0.291514 | 36.5    |
| ENSGALT0000 family with sequence similarity 213  | FAM213A | 0.628619 | 505.319 |
| ENSGALT0000 family with sequence similarity 21,  | FAM21A  | 0.987509 | 1466    |
| ENSGALT0000 family with sequence similarity 26,  | FAM26D  | 0.649519 | 0       |
| ENSGALT0000 family with sequence similarity 26,  | FAM26E  | 0.840435 | 28.5    |
| ENSGALT0000 family with sequence similarity 26,  | FAM26F  | 0.353553 | 0       |
| ENSGALT0000 family with sequence similarity 32,  | FAM32A  | 0.642264 | 2824.5  |
| ENSGALT0000 family with sequence similarity 35,  | FAM35A  | 0.993621 | 438.5   |
| ENSGALT0000 family with sequence similarity 36,  | FAM36A  | 0.936062 | 165.5   |
| ENSGALT0000 family with sequence similarity 38,  | FAM38A  | 0.971873 | 1008.5  |
| ENSGALT0000 family with sequence similarity 3,   | FAM3B   | 0.921435 | 53.5    |
| ENSGALT0000 family with sequence similarity 3,   | FAM3C   | 0.986619 | 526     |
| ENSGALT0000 family with sequence similarity 3,   | FAM3D   | 0.853815 | 0.5     |
| ENSGALT0000 family with sequence similarity 40,  | FAM40A  | 0.881069 | 1292.5  |
| ENSGALT0000 family with sequence similarity 40,  | FAM40B  | 0.922059 | 389     |
| ENSGALT0000 family with sequence similarity 43,  | FAM43A  | 0.880936 | 3490.5  |
| ENSGALT0000 family with sequence similarity 45,  | FAM45A  | 0.924799 | 719.998 |
| ENSGALT0000 family with sequence similarity 46,  | FAM46A  | 0.974341 | 1031    |
| ENSGALT0000 family with sequence similarity 46,  | FAM46B  | 0.984928 | 629     |
| ENSGALT0000 Protein FAM46C                       | FAM46C  | 0.918078 | 43      |
| ENSGALT0000 family with sequence similarity 46,  | FAM46D  | 0.956728 | 29      |
| ENSGALT0000 family with sequence similarity 48,  | FAM48A  | 0.969588 | 1423.02 |
| ENSGALT0000 family with sequence similarity 49,  | FAM49A  | 0.943621 | 1602    |
| ENSGALT0000 family with sequence similarity 49,  | FAM49B  | 0.855706 | 939.5   |
| ENSGALT0000 family with sequence similarity 53,  | FAM53A  | 0.990639 | 956.991 |
| ENSGALT0000 family with sequence similarity 53,  | FAM53B  | 0.916584 | 216.5   |
| ENSGALT0000 family with sequence similarity 54,  | FAM54A  | 0.940778 | 403.5   |
| ENSGALT0000 family with sequence similarity 54,  | FAM54B  | 0.932987 | 813     |
| ENSGALT0000 family with sequence similarity 55,  | FAM55C  | 0.976692 | 334     |
| ENSGALT0000 family with sequence similarity 57,  | FAM57A  | 0.893477 | 237.5   |
| ENSGALT0000 family with sequence similarity 59,  | FAM59A  | 0.924386 | 766     |
| ENSGALT0000 family with sequence similarity 59,  | FAM59B  | 0.56783  | 58      |
| ENSGALT0000 family with sequence similarity 5,   | FAM5B   | 0.552012 | 22      |
| ENSGALT0000 family with sequence similarity 5,   | FAM5C   | 0.839104 | 61.5    |
| ENSGALT0000 family with sequence similarity 60,  | FAM60A  | 0.989135 | 3441.5  |

|                                                  |          |          |         |
|--------------------------------------------------|----------|----------|---------|
| ENSGALT0000 family with sequence similarity 62   | ( FAM62C | 0.964128 | 121     |
| ENSGALT0000 family with sequence similarity 64   | FAM64A   | 0.981994 | 139.5   |
| ENSGALT0000 family with sequence similarity 65   | FAM65A   | 0.801724 | 2283.5  |
| ENSGALT0000 family with sequence similarity 65   | FAM65B   | 0.701727 | 707.499 |
| ENSGALT0000 family with sequence similarity 65   | FAM65C   | 0.990708 | 629.5   |
| ENSGALT0000 family with sequence similarity 69   | FAM69A   | 0.947979 | 68      |
| ENSGALT0000 family with sequence similarity 69   | FAM69B   | 0.983678 | 751     |
| ENSGALT0000 family with sequence similarity 69   | FAM69C   | 0.528914 | 478.5   |
| ENSGALT0000 family with sequence similarity 70   | FAM70A   | 0.84751  | 498.5   |
| ENSGALT0000 family with sequence similarity 70   | FAM70B   | 0.434068 | 29.5    |
| ENSGALT0000 family with sequence similarity 71   | FAM71D   | ?        | 0       |
| ENSGALT0000 family with sequence similarity 72   | FAM72A   | 0.744678 | 266.5   |
| ENSGALT0000 family with sequence similarity 73   | FAM73A   | 0.981524 | 236     |
| ENSGALT0000 family with sequence similarity 73   | FAM73B   | 0.964569 | 674.5   |
| ENSGALT0000 family with sequence similarity 76   | FAM76A   | 0.988068 | 2256.95 |
| ENSGALT0000 family with sequence similarity 76   | FAM76B   | 0.982073 | 661.5   |
| ENSGALT0000 family with sequence similarity 78   | FAM78A   | 0.859769 | 37.5    |
| ENSGALT0000 family with sequence similarity 78   | FAM78B   | 0.845927 | 136.5   |
| ENSGALT0000 family with sequence similarity 81   | FAM81A   | 0.864766 | 132.5   |
| ENSGALT0000 family with sequence similarity 81   | FAM81B   | ?        | 0       |
| ENSGALT0000 family with sequence similarity 82   | FAM82A1  | 0.9316   | 68.5    |
| ENSGALT0000 family with sequence similarity 82   | FAM82A2  | 0.924116 | 499.501 |
| ENSGALT0000 family with sequence similarity 82   | FAM82B   | 0.903238 | 149     |
| ENSGALT0000 family with sequence similarity 83   | FAM83A   | 0.627428 | 20.5    |
| ENSGALT0000 family with sequence similarity 83   | FAM83B   | 0.906608 | 61      |
| ENSGALT0000 family with sequence similarity 83   | FAM83C   | 0.960915 | 2.5     |
| ENSGALT0000 family with sequence similarity 83   | FAM83D   | 0.929422 | 184     |
| ENSGALT0000 family with sequence similarity 83   | FAM83F   | 0.580939 | 229.5   |
| ENSGALT0000 family with sequence similarity 83   | FAM83G   | 0.984669 | 365.5   |
| ENSGALT0000 family with sequence similarity 83   | FAM83H   | 0.96352  | 773     |
| ENSGALT0000 family with sequence similarity 84   | FAM84A   | 0.988221 | 966     |
| ENSGALT0000 family with sequence similarity 84   | FAM84B   | 0.984694 | 282     |
| ENSGALT0000 family with sequence similarity 86   | FAM86A   | 0.961078 | 577.501 |
| ENSGALT0000 family with sequence similarity 89   | FAM89A   | 0.896151 | 3438    |
| ENSGALT0000 family with sequence similarity 8    | FAM8A1   | 0.943562 | 179.5   |
| ENSGALT0000 family with sequence similarity 91   | FAM91A1  | 0.955646 | 1059.5  |
| ENSGALT0000 family with sequence similarity 92   | FAM92A1  | 0.950554 | 284     |
| ENSGALT0000 family with sequence similarity 96   | FAM96A   | 0.340416 | 751.498 |
| ENSGALT0000 family with sequence similarity 96   | FAM96B   | 0.581288 | 1456    |
| ENSGALT0000 family with sequence similarity 98   | FAM98A   | 0.884849 | 1153    |
| ENSGALT0000 family with sequence similarity 98   | FAM98B   | 0.906903 | 1084.5  |
| ENSGALT0000 FANCD2/FANCI-associated nuclea       | FAN1     | 0.963752 | 779.003 |
| ENSGALT0000 Fanconi anemia, complementation      | FANCA    | 0.935433 | 681.49  |
| ENSGALT0000 Fanconi anemia, complementation      | FANCB    | 0.961597 | 71.5    |
| ENSGALT0000 Fanconi anemia, complementation      | FANCC    | 0.961275 | 539.5   |
| ENSGALT0000 Fanconi anemia, complementation      | FANCD2   | 0.928921 | 757.497 |
| ENSGALT0000 Fanconi anemia, complementation      | FANCE    | 0.945521 | 331.5   |
| ENSGALT0000 Fanconi anemia, complementation      | FANCF    | 0.472567 | 150.5   |
| ENSGALT0000 Fanconi anemia, complementation      | FANCG    | 0.807276 | 131     |
| ENSGALT0000 Fanconi anemia, complementation      | FANCI    | 0.952269 | 567.227 |
| ENSGALT0000 Fanconi anemia, complementation      | FANCL    | 0.840941 | 808.394 |
| ENSGALT0000 Fanconi anemia, complementation      | FANCM    | 0.985542 | 1313.01 |
| ENSGALT0000 fibroblast activation protein, alpha | FAP      | 0.962098 | 112     |
| ENSGALT0000 fatty acyl CoA reductase 1           | FAR1     | 0.995759 | 2320.04 |
| ENSGALT0000 fatty acyl CoA reductase 2           | FAR2     | 0.909564 | 219     |
| ENSGALT0000 FERM, RhoGEF (ARHGEF) and pl         | FARP1    | 0.999764 | 5904    |

|                                                        |         |          |         |
|--------------------------------------------------------|---------|----------|---------|
| ENSGALT0000 FERM, RhoGEF and pleckstrin dor FARP2      |         | 0.927597 | 1238.5  |
| ENSGALT0000 phenylalanyl-tRNA synthetase 2, m FARS2    |         | 0.825638 | 560     |
| ENSGALT0000 phenylalanyl-tRNA synthetase, bet: FARSB   |         | 0.879281 | 2224    |
| ENSGALT0000 Fas (TNF receptor superfamily, me FAS      |         | 0.72105  | 6       |
| ENSGALT0000 Fas ligand (TNF superfamily, memt FASLG    |         | 0.935494 | 6.15867 |
| ENSGALT0000 fatty acid synthase                        | FASN    | 0.937061 | 16497.6 |
| ENSGALT0000 FAST kinase domains 1                      | FASTKD1 | 0.993092 | 371     |
| ENSGALT0000 FAST kinase domains 2                      | FASTKD2 | 0.930588 | 854     |
| ENSGALT0000 FAST kinase domains 3                      | FASTKD3 | 0.964851 | 269.5   |
| ENSGALT0000 FAT tumor suppressor homolog 1 (  FAT1     |         | 0.974282 | 10868.5 |
| ENSGALT0000 FAT tumor suppressor homolog 2 (  FAT2     |         | 0.980926 | 262.5   |
| ENSGALT0000 FAT tumor suppressor homolog 3 (  FAT3     |         | 0.917505 | 2189.5  |
| ENSGALT0000 FAT tumor suppressor homolog 4 (  FAT4     |         | 0.989269 | 4373.5  |
| ENSGALT0000 Fas (TNFRSF6) binding factor 1             | FBF1    | 0.952448 | 4451.48 |
| ENSGALT0000 filamin binding LIM protein 1              | FBLIM1  | 0.87277  | 449.001 |
| ENSGALT0000 fibulin 1                                  | FBLN1   | 0.93585  | 2782.5  |
| ENSGALT0000 fibulin 2                                  | FBLN2   | 0.80481  | 2407    |
| ENSGALT0000 fibulin 5                                  | FBLN5   | 0.713839 | 222.5   |
| ENSGALT0000 fibulin 7                                  | FBLN7   | 0.939314 | 283     |
| ENSGALT0000 fibrillin 1                                | FBN1    | 0.920353 | 1964.01 |
| ENSGALT0000 fibrillin 2                                | FBN2    | 0.99788  | 58412.3 |
| ENSGALT0000 fructose-1,6-bisphosphatase 1              | FBP1    | 0.88339  | 303     |
| ENSGALT0000 fructose-1,6-bisphosphatase 2              | FBP2    | 0.647324 | 19      |
| ENSGALT0000 fibrosin-like 1                            | FBRSL1  | 0.940858 | 1826.5  |
| ENSGALT0000 F-box and leucine-rich repeat prote FBXL13 |         | 0.961098 | 20.5901 |
| ENSGALT0000 F-box and leucine-rich repeat prote FBXL14 |         | 0.936069 | 820.005 |
| ENSGALT0000 F-box and leucine-rich repeat prote FBXL15 |         | 0.990788 | 703.5   |
| ENSGALT0000 F-box and leucine-rich repeat prote FBXL16 |         | 0.554364 | 340     |
| ENSGALT0000 F-box and leucine-rich repeat prote FBXL17 |         | 0.973529 | 260     |
| ENSGALT0000 F-box and leucine-rich repeat prote FBXL18 |         | 0.939812 | 427.501 |
| ENSGALT0000 F-box and leucine-rich repeat prote FBXL2  |         | 0.992766 | 1034    |
| ENSGALT0000 F-box and leucine-rich repeat prote FBXL20 |         | 0.948348 | 1173.5  |
| ENSGALT0000 F-box and leucine-rich repeat prote FBXL21 |         | 0.999891 | 379     |
| ENSGALT0000 F-box and leucine-rich repeat prote FBXL3  |         | 0.976112 | 1037    |
| ENSGALT0000 F-box and leucine-rich repeat prote FBXL4  |         | 0.978358 | 241     |
| ENSGALT0000 F-box and leucine-rich repeat prote FBXL5  |         | 0.967252 | 1436.5  |
| ENSGALT0000 F-box and leucine-rich repeat prote FBXL7  |         | 0.914025 | 298     |
| ENSGALT0000 F-box protein 11                           | FBXO11  | 0.963559 | 2542    |
| ENSGALT0000 F-box protein 15                           | FBXO15  | 0.879477 | 83      |
| ENSGALT0000 F-box protein 16                           | FBXO16  | 0.883768 | 15.5    |
| ENSGALT0000 F-box protein, helicase, 18                | FBXO18  | 0.999737 | 1214.5  |
| ENSGALT0000 F-box protein 2                            | FBXO2   | 0.903712 | 264     |
| ENSGALT0000 F-box protein 21                           | FBXO21  | 0.938072 | 1653.5  |
| ENSGALT0000 F-box protein 22                           | FBXO22  | 0.934302 | 1875.5  |
| ENSGALT0000 F-box protein 25                           | FBXO25  | 0.997792 | 392.5   |
| ENSGALT0000 F-box protein 28                           | FBXO28  | 0.933531 | 553     |
| ENSGALT0000 F-box protein 3                            | FBXO3   | 0.920258 | 1599    |
| ENSGALT0000 F-box protein 30                           | FBXO30  | 0.980521 | 334     |
| ENSGALT0000 F-box protein 31                           | FBXO31  | 0.885183 | 906.5   |
| ENSGALT0000 F-box protein 32                           | FBXO32  | 0.950295 | 805     |
| ENSGALT0000 F-box protein 33                           | FBXO33  | 0.971886 | 595.5   |
| ENSGALT0000 F-box only protein 34                      | FBXO34  | 0.905251 | 967.5   |
| ENSGALT0000 F-box protein 39                           | FBXO39  | 0.958115 | 191     |
| ENSGALT0000 F-box protein 4                            | FBXO4   | 0.924696 | 104     |
| ENSGALT0000 F-box protein 40                           | FBXO40  | 0.852968 | 19.5    |
| ENSGALT0000 F-box protein 41                           | FBXO41  | 0.714259 | 122     |

|                                                   |         |          |         |
|---------------------------------------------------|---------|----------|---------|
| ENSGALT0000 F-box protein 42                      | FBXO42  | 0.92939  | 1877    |
| ENSGALT0000 F-box protein 43                      | FBXO43  | 0.464758 | 0       |
| ENSGALT0000 F-box protein 45                      | FBXO45  | 0.867505 | 2087    |
| ENSGALT0000 F-box protein 47                      | FBXO47  | ?        | 0       |
| ENSGALT0000 F-box protein 48                      | FBXO48  | 0.541007 | 81      |
| ENSGALT0000 F-box protein 5                       | FBXO5   | 0.951333 | 217.393 |
| ENSGALT0000 F-box protein 6                       | FBXO6   | 0.948145 | 246.5   |
| ENSGALT0000 F-box protein 7                       | FBXO7   | 0.974529 | 1432.5  |
| ENSGALT0000 F-box protein 8                       | FBXO8   | 0.954406 | 361     |
| ENSGALT0000 F-box protein 9                       | FBXO9   | 0.906171 | 2144.5  |
| ENSGALT0000 F-box and WD repeat domain cont       | FBXW11  | 0.956955 | 2743    |
| ENSGALT0000 F-box and WD repeat domain cont       | FBXW2   | 0.961767 | 932     |
| ENSGALT0000 F-box and WD repeat domain cont       | FBXW4   | 0.819802 | 802     |
| ENSGALT0000 F-box and WD repeat domain cont       | FBXW5   | 0.937349 | 1485.04 |
| ENSGALT0000 F-box and WD repeat domain cont       | FBXW7   | 0.941078 | 859.5   |
| ENSGALT0000 F-box and WD repeat domain cont       | FBXW8   | 0.968998 | 1897    |
| ENSGALT0000 FCF1 small subunit (SSU) process      | FCF1    | 0.777977 | 1035.5  |
| ENSGALT0000 Fc fragment of IgG binding protein    | FCGBP   | 0.676602 | 14      |
| ENSGALT0000 FCH domain only 2                     | FCHO2   | 0.991364 | 458.501 |
| ENSGALT0000 FCH and double SH3 domains 1          | FCHSD1  | 0.881525 | 538.996 |
| ENSGALT0000 FCH and double SH3 domains 2          | FCHSD2  | 0.849492 | 907.5   |
| ENSGALT0000 ficolin (collagen/fibrinogen domain   | FCN2    | 0.989685 | 49.5    |
| ENSGALT0000 farnesyl-diphosphate farnesyltransf   | FDFT1   | 0.771653 | 2100.53 |
| ENSGALT0000 ferredoxin 1                          | FDX1    | 0.929428 | 154.5   |
| ENSGALT0000 ferredoxin-fold anticodon binding d   | FDXACB1 | 0.972242 | 331.5   |
| ENSGALT0000 ferredoxin reductase                  | FDXR    | 0.888608 | 1148.5  |
| ENSGALT0000 ferrocyclase                          | FECH    | 0.926211 | 586.002 |
| ENSGALT0000 fem-1 homolog a (C. elegans)          | FEM1A   | 0.932859 | 2853.5  |
| ENSGALT0000 fem-1 homolog b (C. elegans)          | FEM1B   | 0.953904 | 2692.5  |
| ENSGALT0000 fem-1 homolog c (C. elegans)          | FEM1C   | 0.998372 | 230     |
| ENSGALT0000 Flap endonuclease 1                   | FEN1    | 0.859396 | 3484.5  |
| ENSGALT0000 fer (fps/fes related) tyrosine kinase | FER     | 0.995997 | 425.998 |
| ENSGALT0000 fer-1-like 4 (C. elegans)             | FER1L4  | 0.893126 | 421.5   |
| ENSGALT0000 fer-1-like 6 (C. elegans)             | FER1L6  | 0.888837 | 7.5     |
| ENSGALT0000 Fer3-like (Drosophila)                | FERD3L  | 0.649519 | 0       |
| ENSGALT0000 fermitin family member 1              | FERMT1  | 0.982287 | 435     |
| ENSGALT0000 feline sarcoma oncogene               | FES     | 0.499521 | 47      |
| ENSGALT0000 fetuin B                              | FETUB   | 0.853815 | 0.5     |
| ENSGALT0000 fasciculation and elongation proteir  | FEZ1    | 0.585874 | 4152    |
| ENSGALT0000 fasciculation and elongation proteir  | FEZ2    | 0.989956 | 625.502 |
| ENSGALT0000 FEZ family zinc finger 1              | FEZF1   | 0.200252 | 0       |
| ENSGALT0000 FEZ family zinc finger 2              | FEZF2   | 0.959758 | 23      |
| ENSGALT0000 fibrinogen alpha chain                | FGA     | ?        | 0       |
| ENSGALT0000 fibrinogen beta chain                 | FGB     | 0.852274 | 25      |
| ENSGALT0000 FYVE, RhoGEF and PH domain co         | FGD3    | 0.892448 | 2346.49 |
| ENSGALT0000 FYVE, RhoGEF and PH domain co         | FGD4    | 0.988177 | 242.5   |
| ENSGALT0000 FYVE, RhoGEF and PH domain co         | FGD5    | 0.807986 | 317.001 |
| ENSGALT0000 FYVE, RhoGEF and PH domain co         | FGD6    | 0.98318  | 923     |
| ENSGALT0000 fibroblast growth factor 1 (acidic)   | FGF1    | 0.970252 | 180.181 |
| ENSGALT0000 fibroblast growth factor 10           | FGF10   | 0.969978 | 208     |
| ENSGALT0000 fibroblast growth factor 12           | FGF12   | 0.652203 | 809.997 |
| ENSGALT0000 fibroblast growth factor 13           | FGF13   | 0.613876 | 139.5   |
| ENSGALT0000 fibroblast growth factor 14           | FGF14   | 0.809987 | 52      |
| ENSGALT0000 fibroblast growth factor 16           | FGF16   | 0.638426 | 196.5   |
| ENSGALT0000 fibroblast growth factor 18           | FGF18   | 0.517022 | 185     |
| ENSGALT0000 fibroblast growth factor 19           | FGF19   | 0.576828 | 347.999 |

|                                                    |          |           |         |
|----------------------------------------------------|----------|-----------|---------|
| ENSGALT0000 fibroblast growth factor 2 (basic)     | FGF2     | 0.990183  | 119     |
| ENSGALT0000 fibroblast growth factor 20            | FGF20    | 0.733274  | 207     |
| ENSGALT0000 fibroblast growth factor 22            | FGF22    | 0.163632  | 33.5    |
| ENSGALT0000 fibroblast growth factor 23            | FGF23    | ?         | 0       |
| ENSGALT0000 fibroblast growth factor 3             | FGF3     | 0.993191  | 253.5   |
| ENSGALT0000 fibroblast growth factor 4             | FGF4     | 0.579551  | 0.5     |
| ENSGALT0000 fibroblast growth factor 5             | FGF5     | 0.834055  | 21      |
| ENSGALT0000 fibroblast growth factor 6             | FGF6     | 0.694304  | 1.5     |
| ENSGALT0000 fibroblast growth factor 7             | FGF7     | 0.87118   | 3.5     |
| ENSGALT0000 fibroblast growth factor 8 (androger   | FGF8     | 0.48136   | 265.5   |
| ENSGALT0000 fibroblast growth factor 9 (glia-activ | FGF9     | 0.973636  | 244.001 |
| ENSGALT0000 fibroblast growth factor binding prot  | FGFBP1   | 0.0332725 | 0       |
| ENSGALT0000 fibroblast growth factor binding prot  | FGFBP2   | 0.841321  | 30.5    |
| ENSGALT0000 fibroblast growth factor receptor 1    | FGFR1    | 0.971575  | 10326.5 |
| ENSGALT0000 FGFR1 oncogene partner                 | FGFR1OP  | 0.955113  | 318     |
| ENSGALT0000 FGFR1 oncogene partner 2               | FGFR1OP2 | 0.980574  | 514     |
| ENSGALT0000 fibroblast growth factor receptor 2    | FGFR2    | 0.875894  | 5375.81 |
| ENSGALT0000 fibroblast growth factor receptor 3    | FGFR3    | 0.663572  | 5832.88 |
| ENSGALT0000 fibroblast growth factor receptor-like | FGFRL1   | 0.917173  | 4224.5  |
| ENSGALT0000 fibrinogen gamma chain                 | FGG      | 0.549507  | 0       |
| ENSGALT0000 FGGY carbohydrate kinase domain        | FGGY     | 0.807835  | 310.5   |
| ENSGALT0000 fibrinogen-like 1                      | FGL1     | 0.865032  | 23      |
| ENSGALT0000 fibrinogen-like 2                      | FGL2     | 0.293034  | 1       |
| ENSGALT0000 fumarate hydratase                     | FH       | 0.796436  | 2366.5  |
| ENSGALT0000 forkhead-associated (FHA) phosph       | FHAD1    | 0.992821  | 67.5    |
| ENSGALT0000 FH2 domain containing 1                | FHDC1    | 0.884588  | 793     |
| ENSGALT0000 fragile histidine triad gene           | FHIT     | 0.372458  | 70.5    |
| ENSGALT0000 four and a half LIM domains 1          | FHL1     | 0.90168   | 34      |
| ENSGALT0000 four and a half LIM domains 2          | FHL2     | 0.558439  | 149.5   |
| ENSGALT0000 four and a half LIM domains 3          | FHL3     | 0.730978  | 691.5   |
| ENSGALT0000 four and a half LIM domains 5          | FHL5     | 0.900073  | 17      |
| ENSGALT0000 formin homology 2 domain containi      | FHOD1    | 0.968132  | 510.5   |
| ENSGALT0000 formin homology 2 domain containi      | FHOD3    | 0.853846  | 466.501 |
| ENSGALT0000 fibrinogen C domain containing 1       | FIBCD1   | 0.936244  | 57.5    |
| ENSGALT0000 fin bud initiation factor homolog (ze  | FIBIN    | 0.571139  | 765.431 |
| ENSGALT0000 FIC domain containing                  | FICD     | 0.989381  | 470.5   |
| ENSGALT0000 FIG4 homolog, SAC1 lipid phosph        | FIG4     | 0.998549  | 600.5   |
| ENSGALT0000 c-fos induced growth factor (vascul    | FIGF     | 0.838683  | 1090.99 |
| ENSGALT0000 filamin A interacting protein 1        | FILIP1   | 0.993256  | 753     |
| ENSGALT0000 filamin A interacting protein 1-like   | FILIP1L  | 0.968862  | 37.5    |
| ENSGALT0000 FIP1 like 1 (S. cerevisiae)            | FIP1L1   | 0.924368  | 957.503 |
| ENSGALT0000 fat storage-inducing transmembran      | FITM2    | 0.910685  | 259     |
| ENSGALT0000 FK506 binding protein 10, 65 kDa       | FKBP10   | 0.988321  | 1915    |
| ENSGALT0000 FK506 binding protein 14, 22 kDa       | FKBP14   | 0.954878  | 532.5   |
| ENSGALT0000 FK506 binding protein 15, 133kDa       | FKBP15   | 0.951576  | 1416.5  |
| ENSGALT0000 FK506 binding protein 1B, 12.6 kDa     | FKBP1B   | 0.684124  | 278.5   |
| ENSGALT0000 FK506 binding protein 3, 25kDa         | FKBP3    | 0.867445  | 1469.02 |
| ENSGALT0000 FK506 binding protein 4, 59kDa         | FKBP4    | 0.859336  | 4932.47 |
| ENSGALT0000 FK506 binding protein 5                | FKBP5    | 0.958776  | 1742    |
| ENSGALT0000 FK506 binding protein 6, 36kDa         | FKBP6    | 0.932927  | 49.5    |
| ENSGALT0000 FK506 binding protein 7                | FKBP7    | 0.729607  | 880.5   |
| ENSGALT0000 FK506 binding protein 8, 38kDa         | FKBP8    | 0.941917  | 1117.5  |
| ENSGALT0000 FK506 binding protein 9, 63 kDa        | FKBP9    | 0.977484  | 7324    |
| ENSGALT0000 feather keratin I                      | F-KER    | ?         | 0       |
| ENSGALT0000 fukutin related protein                | FKRP     | 0.880326  | 802     |
| ENSGALT0000 fukutin                                | FKTN     | 0.977219  | 290.5   |

|                                                       |         |          |         |
|-------------------------------------------------------|---------|----------|---------|
| ENSGALT0000 folliculin                                | FLCN    | 0.960811 | 1562.5  |
| ENSGALT0000 Friend leukemia virus integration 1       | FLI1    | 0.787095 | 231.5   |
| ENSGALT0000 flightless I homolog (Drosophila)         | FLII    | 0.865006 | 4368.97 |
| ENSGALT0000 filamin B, beta                           | FLNB    | 0.994697 | 23370.2 |
| ENSGALT0000 flotillin 2                               | FLOT2   | 0.88249  | 2960.33 |
| ENSGALT0000 fibronectin leucine rich transmembr       | FLRT2   | 0.94802  | 754.5   |
| ENSGALT0000 fibronectin leucine rich transmembr       | FLRT3   | 0.988063 | 3130    |
| ENSGALT0000 fms-related tyrosine kinase 1 (vasc       | FLT1    | 0.918342 | 196.5   |
| ENSGALT0000 fms-related tyrosine kinase 4             | FLT4    | 0.899302 | 375.5   |
| ENSGALT0000 feline leukemia virus subgroup C $\alpha$ | FLVCR1  | 0.903319 | 669     |
| ENSGALT0000 feline leukemia virus subgroup C $\alpha$ | FLVCR2  | 0.990433 | 393.5   |
| ENSGALT0000 FLYWCH family member 2                    | FLYWCH2 | 0.898356 | 1       |
| ENSGALT0000 formin 1                                  | FMN1    | 0.996435 | 804.5   |
| ENSGALT0000 formin 2                                  | FMN2    | 0.684953 | 154.5   |
| ENSGALT0000 formin-like 1                             | FMNL1   | 0.618773 | 19.5    |
| ENSGALT0000 formin-like 2                             | FMNL2   | 0.972156 | 2114.01 |
| ENSGALT0000 flavin containing monooxygenase 4         | FMO4    | 0.630933 | 2       |
| ENSGALT0000 flavin containing monooxygenase 6         | FMO6P   | 0.975869 | 25      |
| ENSGALT0000 fibromodulin                              | FMOD    | 0.960844 | 18      |
| ENSGALT0000 fragile X mental retardation 1            | FMR1    | 0.977273 | 1977.5  |
| ENSGALT0000 fibronectin 1                             | FN1     | 0.983635 | 63782.5 |
| ENSGALT0000 fructosamine 3 kinase                     | FN3K    | 0.998898 | 25      |
| ENSGALT0000 fructosamine 3 kinase related prote       | FN3KRP  | 0.895309 | 572.5   |
| ENSGALT0000 formin binding protein 1                  | FNBP1   | 0.955917 | 952.5   |
| ENSGALT0000 formin binding protein 1-like             | FNBP1L  | 0.965131 | 3150.5  |
| ENSGALT0000 formin binding protein 4                  | FNBP4   | 0.916109 | 4750.5  |
| ENSGALT0000 fibronectin type III domain containir     | FNDC1   | 0.516499 | 105.5   |
| ENSGALT0000 fibronectin type III domain containir     | FNDC3A  | 0.954787 | 4839.5  |
| ENSGALT0000 fibronectin type III domain containir     | FNDC3B  | 0.984672 | 2076    |
| ENSGALT0000 fibronectin type III domain containir     | FNDC4   | 0.812105 | 68      |
| ENSGALT0000 fibronectin type III domain containir     | FNDC5   | 0.673273 | 38.5    |
| ENSGALT0000 fibronectin type III domain containir     | FNDC7   | 0.988676 | 275.167 |
| ENSGALT0000 fibronectin type III domain containir     | FNDC9   | 0.925168 | 4.5     |
| ENSGALT0000 folliculin interacting protein 1          | FNIP1   | 0.963153 | 1394.96 |
| ENSGALT0000 folliculin interacting protein 2          | FNIP2   | 0.930358 | 905.5   |
| ENSGALT0000 farnesyltransferase, CAAX box, alp        | FNTA    | 0.909166 | 583.5   |
| ENSGALT0000 folate hydrolase (prostate-specific r     | FOLH1   | 0.912512 | 81.5    |
| ENSGALT0000 folate receptor 1 (adult)                 | FOLR1   | 0.562993 | 0       |
| ENSGALT0000 FGFR1OP N-terminal like                   | FOPNL   | 0.70294  | 568     |
| ENSGALT0000 FOS-like antigen 2                        | FOSL2   | 0.700447 | 65      |
| ENSGALT0000 forkhead box A2                           | FOXA2   | 0.464758 | 0.5     |
| ENSGALT0000 forkhead box C2 (MFH-1, mesench           | FOXC2   | 0.721942 | 774.453 |
| ENSGALT0000 Forkhead box protein D3                   | FOXD3   | 0.489421 | 228.902 |
| ENSGALT0000 forkhead box E3                           | FOXE3   | 0.127965 | 2.50842 |
| ENSGALT0000 forkhead box F1                           | FOXF1   | 0.992711 | 46      |
| ENSGALT0000 forkhead box G1                           | FOXG1   | 0.763128 | 2213.37 |
| ENSGALT0000 forkhead box I1                           | FOXI1   | 0.707664 | 0.5     |
| ENSGALT0000 forkhead box I3                           | FOXI3   | 0.947775 | 20.5    |
| ENSGALT0000 forkhead box J1                           | FOXJ1   | 0.974307 | 87.5    |
| ENSGALT0000 forkhead box J2                           | FOXJ2   | 0.990304 | 1286.5  |
| ENSGALT0000 forkhead box K1                           | FOXK1   | 0.93867  | 687.001 |
| ENSGALT0000 forkhead box K2                           | FOXK2   | 0.931259 | 1307.5  |
| ENSGALT0000 forkhead box L1                           | FOXL1   | 0.914324 | 32.5895 |
| ENSGALT0000 forkhead box L2                           | FOXL2   | 0.577126 | 13      |
| ENSGALT0000 forkhead box M1                           | FOXM1   | 0.961701 | 938.529 |
| ENSGALT0000 forkhead box N1                           | FOXN1   | 0.721383 | 2.5     |

|                                                      |          |          |         |
|------------------------------------------------------|----------|----------|---------|
| ENSGALT0000 forkhead box N3                          | FOXN3    | 0.993105 | 491.5   |
| ENSGALT0000 forkhead box N4                          | FOXN4    | 0.732031 | 29      |
| ENSGALT0000 forkhead box O1A                         | FOXO1A   | 0.972879 | 76.5    |
| ENSGALT0000 forkhead box O3                          | FOXO3    | 0.950636 | 539     |
| ENSGALT0000 forkhead box O4                          | FOXO4    | 0.99517  | 818     |
| ENSGALT0000 forkhead box P1                          | FOXP1    | 0.920181 | 1912.02 |
| ENSGALT0000 forkhead box P2                          | FOXP2    | 0.939321 | 371.58  |
| ENSGALT0000 forkhead box P3                          | FOXP3    | 0.970796 | 287.471 |
| ENSGALT0000 forkhead box P4                          | FOXP4    | 0.995258 | 3845.5  |
| ENSGALT0000 FAD-dependent oxidoreductase do          | FOXRED1  | 0.681742 | 796     |
| ENSGALT0000 FAD-dependent oxidoreductase do          | FOXRED2  | 0.960804 | 482.148 |
| ENSGALT0000 forkhead box S1                          | FOXS1    | 0.415803 | 65.6825 |
| ENSGALT0000 foyllypolyglutamate synthase             | FPGS     | 0.962481 | 257.5   |
| ENSGALT0000 fragile site, folic acid type, rare, fra | FRA10AC1 | 0.952128 | 481.5   |
| ENSGALT0000 Fraser syndrome 1                        | FRAS1    | 0.98771  | 7825.03 |
| ENSGALT0000 FRAS1 related extracellular matrix       | FREM1    | 0.962274 | 1637    |
| ENSGALT0000 FRAS1 related extracellular matrix       | FREM2    | 0.779103 | 6767    |
| ENSGALT0000 FSHD region gene 1                       | FRG1     | 0.928214 | 756.5   |
| ENSGALT0000 fyn-related kinase                       | FRK      | 0.714442 | 1.5     |
| ENSGALT0000 FERM domain containing 1                 | FRMD1    | 0.842789 | 303     |
| ENSGALT0000 FERM domain containing 3                 | FRMD3    | 0.732447 | 261.5   |
| ENSGALT0000 FERM domain containing 4A                | FRMD4A   | 0.847303 | 2432.5  |
| ENSGALT0000 FERM domain containing 4B                | FRMD4B   | 0.898075 | 762.959 |
| ENSGALT0000 FERM domain containing 5                 | FRMD5    | 0.800561 | 133     |
| ENSGALT0000 FERM domain containing 6                 | FRMD6    | 0.834113 | 471.5   |
| ENSGALT0000 FERM and PDZ domain containing           | FRMPD1   | 0.705711 | 156     |
| ENSGALT0000 FERM and PDZ domain containing           | FRMPD3   | 0.84544  | 5.5     |
| ENSGALT0000 FERM and PDZ domain containing           | FRMPD4   | 0.825537 | 581.502 |
| ENSGALT0000 ferric-chelate reductase 1               | FRRS1    | 0.990468 | 357     |
| ENSGALT0000 fibroblast growth factor receptor su     | FRS2     | 0.977433 | 293     |
| ENSGALT0000 fibroblast growth factor receptor su     | FRS3     | 0.966694 | 901.5   |
| ENSGALT0000 furry homolog (Drosophila)               | FRY      | 0.808368 | 722.999 |
| ENSGALT0000 FRY-like                                 | FRYL     | 0.964683 | 2586.5  |
| ENSGALT0000 frizzled-related protein                 | FRZB     | 0.768592 | 2512.48 |
| ENSGALT0000 fibrous sheath CABYR binding prot        | FSCB     | ?        | 0       |
| ENSGALT0000 fascin homolog 1, actin-bundling pr      | FSCN1    | 0.779248 | 6149.29 |
| ENSGALT0000 fascin homolog 2, actin-bundling pr      | FSCN2    | 0.855611 | 177.5   |
| ENSGALT0000 fibronectin type III and SPRY doma       | FSD1L    | 0.942895 | 148     |
| ENSGALT0000 fibronectin type III and SPRY doma       | FSD2     | 0.576035 | 1       |
| ENSGALT0000 follicle stimulating hormone, beta p     | FSHB     | 0.280847 | 576     |
| ENSGALT0000 follicle stimulating hormone receptc     | FSHR     | 0.659096 | 9       |
| ENSGALT0000 follistatin                              | FST      | 0.751141 | 13      |
| ENSGALT0000 follistatin-like 1                       | FSTL1    | 0.900293 | 7542.54 |
| ENSGALT0000 follistatin-like 3 (secreted glycoprot   | FSTL3    | 0.165989 | 122.5   |
| ENSGALT0000 follistatin-like 4                       | FSTL4    | 0.995017 | 1359.48 |
| ENSGALT0000 follistatin-like 5                       | FSTL5    | 0.693514 | 91.5    |
| ENSGALT0000 formiminotransferase cyclodeaminæ        | FTCD     | ?        | 0       |
| ENSGALT0000 ferritin, heavy polypeptide 1            | FTH1     | 0.470988 | 23066.4 |
| ENSGALT0000 ferritin, light polypeptide              | FTL      | 0.940691 | 444     |
| ENSGALT0000 fat mass and obesity associated          | FTO      | 0.989377 | 39      |
| ENSGALT0000 FtsJ homolog 3 (E. coli)                 | FTSJ3    | 0.92288  | 1595.52 |
| ENSGALT0000 FtsJ methyltransferase domain con        | FTSJD1   | 0.971036 | 277     |
| ENSGALT0000 FtsJ methyltransferase domain con        | FTSJD2   | 0.953867 | 864     |
| ENSGALT0000 far upstream element (FUSE) bindi        | FUBP1    | 0.93785  | 13207.4 |
| ENSGALT0000 far upstream element (FUSE) bindi        | FUBP3    | 0.94575  | 2405.55 |
| ENSGALT0000 fucosidase, alpha-L- 1, tissue           | FUCA1    | 0.866986 | 974     |



|                                                    |           |          |         |
|----------------------------------------------------|-----------|----------|---------|
| ENSGALT0000 fucosidase, alpha-L- 2, plasma         | FUCA2     | 0.947519 | 705.5   |
| ENSGALT0000 FUN14 domain containing 1              | FUNDC1    | 0.918331 | 1142.5  |
| ENSGALT0000 FUN14 domain containing 2              | FUNDC2    | 0.924921 | 1816.5  |
| ENSGALT0000 furin (paired basic amino acid cleav   | FURIN     | 0.966842 | 3041    |
| ENSGALT0000 fucosyltransferase 10 (alpha (1,3) f   | FUT10     | 0.970437 | 118     |
| ENSGALT0000 fucosyltransferase 11 (alpha (1,3) f   | FUT11     | 0.97503  | 813.5   |
| ENSGALT0000 fucosyltransferase 3 (galactoside 3    | FUT3      | 0.740073 | 2       |
| ENSGALT0000 fucosyltransferase 4 (alpha (1,3) fu   | FUT4      | 0.871117 | 104.5   |
| ENSGALT0000 fucosyltransferase 7 (alpha (1,3) fu   | FUT7      | 0.932599 | 2       |
| ENSGALT0000 fucosyltransferase 8 (alpha (1,6) fu   | FUT8      | 0.888737 | 4014.54 |
| ENSGALT0000 frataxin                               | FXN       | 0.686899 | 123     |
| ENSGALT0000 fragile X mental retardation, autoso   | FXR1      | 0.929572 | 2959.99 |
| ENSGALT0000 FXD domain containing ion transp       | FXD6      | 0.801406 | 207.5   |
| ENSGALT0000 FYN binding protein                    | FYB       | 0.959251 | 11      |
| ENSGALT0000 FYVE and coiled-coil domain conta      | FYCO1     | 0.982305 | 663.497 |
| ENSGALT0000 FYN oncogene related to SRC, FG        | FYN       | 0.780875 | 1241    |
| ENSGALT0000 forty-two-three domain containing 1    | FYTDD1    | 0.960417 | 3025.5  |
| ENSGALT0000 frizzled family receptor 1             | FZD1      | 0.89789  | 4144.9  |
| ENSGALT0000 frizzled family receptor 10            | FZD10     | 0.760062 | 1500    |
| ENSGALT0000 frizzled homolog 2                     | FZD2      | 0.946772 | 3360.91 |
| ENSGALT0000 frizzled family receptor 3             | FZD3      | 0.972486 | 1802.97 |
| ENSGALT0000 Frizzled-4                             | FZD4      | 0.992446 | 3124.5  |
| ENSGALT0000 frizzled family receptor 5             | FZD5      | 0.771012 | 14.008  |
| ENSGALT0000 frizzled family receptor 6             | FZD6      | 0.98356  | 1571.99 |
| ENSGALT0000 frizzled family receptor 7             | FZD7      | 0.969519 | 11036.7 |
| ENSGALT0000 fizzy/cell division cycle 20 related 1 | FZR1      | 0.917471 | 1904.98 |
| ENSGALT0000 G0/G1switch 2                          | G0S2      | 0.357518 | 4       |
| ENSGALT0000 G2/M-phase specific E3 ubiquitin p     | G2E3      | 0.941969 | 717.994 |
| ENSGALT0000 GTPase activating protein (SH3 do      | G3BP1     | 0.930019 | 9380    |
| ENSGALT0000 GTPase activating protein (SH3 do      | G3BP2     | 0.872635 | 2540.04 |
| ENSGALT0000 glucose-6-phosphatase, catalytic, 2    | G6PC2     | 0.990734 | 164.5   |
| ENSGALT0000 glucosidase, alpha; acid               | GAA       | 0.98177  | 436     |
| ENSGALT0000 GRB2-associated binding protein 1      | GAB1      | 0.969859 | 845     |
| ENSGALT0000 GRB2-associated binding protein 2      | GAB2      | 0.746722 | 500.499 |
| ENSGALT0000 GRB2-associated binding protein 3      | GAB3      | 0.749357 | 52.5    |
| ENSGALT0000 GABA(A) receptor-associated prote      | GABARAPL1 | 0.982663 | 415.5   |
| ENSGALT0000 GABA(A) receptor-associated prote      | GABARAPL2 | 0.613091 | 1731.5  |
| ENSGALT0000 gamma-aminobutyric acid (GABA)         | GABBR2    | 0.742319 | 141.5   |
| ENSGALT0000 GA binding protein transcription fac   | GABPA     | 0.964366 | 1422.5  |
| ENSGALT0000 GA binding protein transcription fac   | GABPB1    | 0.961926 | 1364.49 |
| ENSGALT0000 GA binding protein transcription fac   | GABPB2    | 0.675067 | 666     |
| ENSGALT0000 gamma-aminobutyric acid (GABA)         | GABRA1    | 0.975252 | 45.5    |
| ENSGALT0000 gamma-aminobutyric acid (GABA)         | GABRA2    | 0.899675 | 47.5    |
| ENSGALT0000 gamma-aminobutyric acid (GABA)         | GABRA3    | 0.465022 | 41      |
| ENSGALT0000 gamma-aminobutyric acid (GABA)         | GABRA4    | 0.59782  | 6.5     |
| ENSGALT0000 gamma-aminobutyric acid (GABA)         | GABRA5    | 0.876465 | 47      |
| ENSGALT0000 gamma-aminobutyric acid (GABA)         | GABRA6    | 0.935842 | 1.5     |
| ENSGALT0000 gamma-aminobutyric acid (GABA)         | GABRB2    | 0.865212 | 60.5    |
| ENSGALT0000 gamma-aminobutyric acid (GABA)         | GABRB3    | 0.812703 | 149     |
| ENSGALT0000 gamma-aminobutyric acid (GABA)         | GABRE     | 0.359511 | 0.5     |
| ENSGALT0000 gamma-aminobutyric acid (GABA)         | GABRG1    | 0.909505 | 765     |
| ENSGALT0000 gamma-aminobutyric acid (GABA)         | GABRG2    | 0.692943 | 49.5    |
| ENSGALT0000 gamma-aminobutyric acid (GABA)         | GABRP     | 0.961071 | 213.5   |
| ENSGALT0000 gamma-aminobutyric acid (GABA)         | GABRQ     | 0.525188 | 2       |
| ENSGALT0000 gamma-aminobutyric acid (GABA)         | GABRR1    | 0.847446 | 1       |
| ENSGALT0000 gamma-aminobutyric acid (GABA)         | GABRR2    | 0.578857 | 3.5     |

|             |                                     |         |           |          |
|-------------|-------------------------------------|---------|-----------|----------|
| ENSGALT0000 | gamma-aminobutyric acid (GABA)      | GABRR3  | 0.95556   | 11       |
| ENSGALT0000 | glutamate decarboxylase 1 (brain, ( | GAD1    | 0.659305  | 122      |
| ENSGALT0000 | glutamate decarboxylase 2 (pancre   | GAD2    | 0.796906  | 1        |
| ENSGALT0000 | growth arrest and DNA-damage-inc    | GADD45B | 0.682369  | 141.5    |
| ENSGALT0000 | cyclin G associated kinase          | GAK     | 0.990739  | 1092.02  |
| ENSGALT0000 | galanin prepropeptide               | GAL     | 0.582337  | 10       |
| ENSGALT0000 | Gal 10                              | GAL10   | ?         | 0        |
| ENSGALT0000 | Gallinacin-11                       | GAL11   | ?         | 0        |
| ENSGALT0000 | beta-defensin 12                    | GAL12   | 0.464758  | 0        |
| ENSGALT0000 | beta-defensin 13                    | GAL13   | ?         | 0        |
| ENSGALT0000 | gallinacin 2                        | GAL2    | 0.464758  | 0        |
| ENSGALT0000 | galactose-3-O-sulfotransferase 1    | GAL3ST1 | 0.852877  | 1245.5   |
| ENSGALT0000 | galactose-3-O-sulfotransferase 2    | GAL3ST2 | 0.984733  | 4.5      |
| ENSGALT0000 | galactose-3-O-sulfotransferase 4    | GAL3ST4 | 0.464758  | 0        |
| ENSGALT0000 | Gal 4                               | GAL4    | 0.0441942 | 0.5      |
| ENSGALT0000 | Gal 5                               | GAL5    | 0.173876  | 66       |
| ENSGALT0000 | Gal 6                               | GAL6    | 0.64602   | 1        |
| ENSGALT0000 | Gal 7                               | GAL7    | 0.554111  | 1.28E-16 |
| ENSGALT0000 | Gal 8                               | GAL8    | ?         | 0        |
| ENSGALT0000 | Gal 9                               | GAL9    | ?         | 0        |
| ENSGALT0000 | galactosylceramidase                | GALC    | 0.992841  | 488      |
| ENSGALT0000 | UDP-galactose-4-epimerase           | GALE    | 0.832642  | 2105.5   |
| ENSGALT0000 | galactokinase 1                     | GALK1   | 0.856005  | 1282.5   |
| ENSGALT0000 | galactokinase 2                     | GALK2   | 0.986595  | 620.998  |
| ENSGALT0000 | galactose mutarotase (aldose 1-ep   | GALM    | 0.941444  | 1024     |
| ENSGALT0000 | galactosamine (N-acetyl)-6-sulfate  | GALNS   | 0.972931  | 1499.5   |
| ENSGALT0000 | UDP-N-acetyl-alpha-D-galactosam     | GALNT1  | 0.945661  | 3325     |
| ENSGALT0000 | UDP-N-acetyl-alpha-D-galactosam     | GALNT10 | 0.971027  | 398      |
| ENSGALT0000 | UDP-N-acetyl-alpha-D-galactosam     | GALNT11 | 0.898967  | 835      |
| ENSGALT0000 | UDP-N-acetyl-alpha-D-galactosam     | GALNT12 | 0.996107  | 242.5    |
| ENSGALT0000 | UDP-N-acetyl-alpha-D-galactosam     | GALNT13 | 0.904304  | 186.5    |
| ENSGALT0000 | UDP-N-acetyl-alpha-D-galactosam     | GALNT14 | 0.685099  | 9        |
| ENSGALT0000 | UDP-N-acetyl-alpha-D-galactosam     | GALNT2  | 0.987274  | 1851.5   |
| ENSGALT0000 | UDP-N-acetyl-alpha-D-galactosam     | GALNT3  | 0.923201  | 502.5    |
| ENSGALT0000 | UDP-N-acetyl-alpha-D-galactosam     | GALNT5  | 0.828723  | 215.5    |
| ENSGALT0000 | polypeptide N-acetylgalactosaminy   | GALNT6  | 0.94744   | 3753.5   |
| ENSGALT0000 | UDP-N-acetyl-alpha-D-galactosam     | GALNT7  | 0.997154  | 1309.5   |
| ENSGALT0000 | UDP-N-acetyl-alpha-D-galactosam     | GALNT9  | 0.803974  | 342.5    |
| ENSGALT0000 | UDP-N-acetyl-alpha-D-galactosam     | GALNTL1 | 0.823819  | 306      |
| ENSGALT0000 | UDP-N-acetyl-alpha-D-galactosam     | GALNTL2 | 0.996336  | 28.5     |
| ENSGALT0000 | UDP-N-acetyl-alpha-D-galactosam     | GALNTL4 | 0.940879  | 576.5    |
| ENSGALT0000 | UDP-N-acetyl-alpha-D-galactosam     | GALNTL6 | 0.829333  | 156      |
| ENSGALT0000 | galanin receptor 1                  | GALR1   | 0.537979  | 1.5      |
| ENSGALT0000 | galanin receptor 2                  | GALR2   | 0.899847  | 39.5     |
| ENSGALT0000 | galanin receptor 3                  | GALR3   | 0.872443  | 2        |
| ENSGALT0000 | guanidinoacetate N-methyltransfer   | GAMT    | 0.782718  | 71.5     |
| ENSGALT0000 | gigaxonin                           | GAN     | 0.900397  | 128      |
| ENSGALT0000 | glucosidase, alpha; neutral C       | GANC    | 0.984572  | 455      |
| ENSGALT0000 | growth associated protein 43        | GAP43   | 0.485174  | 1147     |
| ENSGALT0000 | glyceraldehyde-3-phosphate dehyd    | GAPDH   | 0.91412   | 147098   |
| ENSGALT0000 | GTPase activating protein and VPS   | GAPVD1  | 0.991964  | 1719     |
| ENSGALT0000 | GAR1 ribonucleoprotein homolog (    | GAR1    | 0.924367  | 379      |
| ENSGALT0000 | GTPase activating Rap/RanGAP di     | GARNL3  | 0.93695   | 1334     |
| ENSGALT0000 | glycyl-tRNA synthetase              | GARS    | 0.751504  | 3682.22  |
| ENSGALT0000 | phosphoribosylglycinamide formyltr  | GART    | 0.924553  | 1867.02  |
| ENSGALT0000 | growth arrest-specific 1            | GAS1    | 0.771617  | 339      |

|                                                   |         |           |         |
|---------------------------------------------------|---------|-----------|---------|
| ENSGALT0000 growth arrest-specific 2              | GAS2    | 0.961938  | 425     |
| ENSGALT0000 growth arrest-specific 2 like 2       | GAS2L2  | 0.639897  | 1       |
| ENSGALT0000 growth arrest-specific 2 like 3       | GAS2L3  | 0.902243  | 120.5   |
| ENSGALT0000 growth arrest-specific 6              | GAS6    | 0.867996  | 231     |
| ENSGALT0000 growth arrest-specific 7              | GAS7    | 0.897764  | 217.5   |
| ENSGALT0000 growth arrest-specific 8              | GAS8    | 0.987513  | 1173    |
| ENSGALT0000 GATA binding protein 2                | GATA2   | 0.756037  | 11037   |
| ENSGALT0000 GATA binding protein 3                | GATA3   | 0.721699  | 7731.5  |
| ENSGALT0000 GATA binding protein 4                | GATA4   | 0.464758  | 1       |
| ENSGALT0000 GATA binding protein 5                | GATA5   | 0.578338  | 3.19797 |
| ENSGALT0000 GATA binding protein 6                | GATA6   | 0.821238  | 11.5    |
| ENSGALT0000 GATA zinc finger domain containing    | GATAD1  | 0.921266  | 352.5   |
| ENSGALT0000 GATA zinc finger domain containing    | GATAD2A | 0.967884  | 2720.5  |
| ENSGALT0000 GATA zinc finger domain containing    | GATAD2B | 0.935483  | 1623    |
| ENSGALT0000 glutamyl-tRNA(Gln) amidotransferase   | GATC    | 0.608866  | 644     |
| ENSGALT0000 glycine amidinotransferase (L-arginin | GATM    | 0.558601  | 17      |
| ENSGALT0000 GATS-like protein 1                   | GATSL1  | 0.975092  | 769.5   |
| ENSGALT0000 GATS protein-like 3                   | GATSL3  | 0.806876  | 160.376 |
| ENSGALT0000 glucosidase, beta (bile acid) 2       | GBA2    | 0.849357  | 1452.5  |
| ENSGALT0000 glioblastoma amplified sequence       | GBAS    | 0.689579  | 2942    |
| ENSGALT0000 eye-globin                            | GBE     | 0.236825  | 399.5   |
| ENSGALT0000 glucan (1,4-alpha-), branching enzy   | GBE1    | 0.95555   | 1186.5  |
| ENSGALT0000 golgi brefeldin A resistant guanine r | GBF1    | 0.979753  | 5586.5  |
| ENSGALT0000 globoside alpha-1,3-N-acetylgalact    | GBGT1   | 0.950589  | 398.5   |
| ENSGALT0000 IN                                    | GBX1    | 0.435284  | 0.7652  |
| ENSGALT0000 gastrulation brain homeobox 2         | GBX2    | 0.0449694 | 21.2348 |
| ENSGALT0000 group-specific component (vitamin     | GC      | 0.579551  | 0.5     |
| ENSGALT0000 glycine C-acetyltransferase           | GCAT    | 0.752301  | 2046    |
| ENSGALT0000 Golgi coiled-coil protein 1           | GCC1    | 0.931577  | 653.5   |
| ENSGALT0000 GRIP and coiled-coil domain contai    | GCC2    | 0.983575  | 520     |
| ENSGALT0000 GC-rich sequence DNA-binding fac      | GCFC1   | 0.978278  | 1109.5  |
| ENSGALT0000 GC-rich sequence DNA-binding fac      | GCFC2   | 0.980921  | 354.095 |
| ENSGALT0000 glucagon                              | GCG     | 0.734793  | 3.5     |
| ENSGALT0000 GTP cyclohydrolase 1                  | GCH1    | 0.704782  | 59      |
| ENSGALT0000 GTP cyclohydrolase I feedback reg     | GCHFR   | 0.160654  | 68      |
| ENSGALT0000 glutamate-cysteine ligase, catalytic  | GCLC    | 0.982313  | 336.5   |
| ENSGALT0000 glutamate-cysteine ligase, modifier   | GCLM    | 0.962197  | 2499.5  |
| ENSGALT0000 glial cells missing homolog 1 (Dros   | GCM1    | 0.562993  | 0       |
| ENSGALT0000 glial cells missing homolog 2 (Dros   | GCM2    | 0.818488  | 1.5     |
| ENSGALT0000 GCN1 general control of amino-aci     | GCN1L1  | 0.966573  | 5423    |
| ENSGALT0000 glucosaminyl (N-acetyl) transferase   | GCNT1   | 0.992192  | 519.5   |
| ENSGALT0000 glucosaminyl (N-acetyl) transferase   | GCNT2   | 0.925945  | 2.5     |
| ENSGALT0000 glucosaminyl (N-acetyl) transferase   | GCNT3   | 0.799357  | 19      |
| ENSGALT0000 glucosaminyl (N-acetyl) transferase   | GCNT4   | 0.688787  | 23.5    |
| ENSGALT0000 glucosaminyl (N-acetyl) transferase   | GCNT7   | 0.86692   | 96      |
| ENSGALT0000 GRINL1A complex locus                 | GCOM1   | 0.952604  | 293.147 |
| ENSGALT0000 glycine cleavage system protein H     | GCSH    | 0.343304  | 1370.97 |
| ENSGALT0000 guanine deaminase                     | GDA     | 0.603065  | 11.5    |
| ENSGALT0000 ganglioside-induced differentiation-  | GDAP1   | 0.807506  | 118.5   |
| ENSGALT0000 ganglioside-induced differentiation-  | GDAP1L1 | 0.512577  | 282.5   |
| ENSGALT0000 ganglioside induced differentiation ; | GDAP2   | 0.92245   | 745     |
| ENSGALT0000 glycerophosphodiester phosphodie      | GDE1    | 0.964351  | 383.999 |
| ENSGALT0000 growth differentiation factor 2       | GDF2    | 0.586226  | 7       |
| ENSGALT0000 growth differentiation factor 3       | GDF3    | 0.835676  | 1166.91 |
| ENSGALT0000 growth differentiation factor 5       | GDF5    | 0.667099  | 31      |
| ENSGALT0000 growth differentiation factor 9       | GDF9    | 0.20566   | 2.5     |

|             |                                       |                |           |         |
|-------------|---------------------------------------|----------------|-----------|---------|
| ENSGALT0000 | GDP dissociation inhibitor 2          | GDI2           | 0.720209  | 13869.3 |
| ENSGALT0000 | glial cell derived neurotrophic facto | GDNF           | 0.769206  | 7.5     |
| ENSGALT0000 | glycerophosphodiester phosphodie      | GDPD1          | 0.948561  | 914.5   |
| ENSGALT0000 | glycerophosphodiester phosphodie      | GDPD2          | 0.990818  | 370.982 |
| ENSGALT0000 | glycerophosphodiester phosphodie      | GDPD4          | 0.662462  | 452.5   |
| ENSGALT0000 | glycerophosphodiester phosphodie      | GDPD5          | 0.739164  | 3255.43 |
| ENSGALT0000 | GTP binding protein overexpressec     | GEM            | 0.436677  | 7       |
| ENSGALT0000 | gem (nuclear organelle) associated    | GEMIN4         | 0.882403  | 3845.14 |
| ENSGALT0000 | gem (nuclear organelle) associated    | GEMIN5         | 0.922264  | 2385    |
| ENSGALT0000 | gem (nuclear organelle) associated    | GEMIN6         | 0.805176  | 512.5   |
| ENSGALT0000 | gem (nuclear organelle) associated    | GEMIN8         | 0.97605   | 511     |
| ENSGALT0000 | Gen homolog 1, endonuclease (Dr       | GEN1           | 0.962803  | 405.001 |
| ENSGALT0000 | golgi to ER traffic protein 4 homolo  | GET4           | 0.888747  | 1469.5  |
| ENSGALT0000 | glial fibrillary acidic protein       | GFAP           | 0.942584  | 9       |
| ENSGALT0000 | growth factor, augmenter of liver re  | GFER           | 0.850623  | 173     |
| ENSGALT0000 | growth factor independent 1 trans     | GF11           | 0.463836  | 76.5    |
| ENSGALT0000 | growth factor independent 1B trans    | GF11B          | 0.880596  | 4.5     |
| ENSGALT0000 | G elongation factor, mitochondrial 1  | GFM1           | 0.912868  | 1848.67 |
| ENSGALT0000 | G elongation factor, mitochondrial 2  | GFM2           | 0.971572  | 536.5   |
| ENSGALT0000 | glucose-fructose oxidoreductase d     | GFOD1          | 0.91683   | 159.5   |
| ENSGALT0000 | glucose-fructose oxidoreductase d     | GFOD2          | 0.893865  | 3251.96 |
| ENSGALT0000 | glutamine--fructose-6-phosphate tr    | GFPT1          | 0.967042  | 6828.35 |
| ENSGALT0000 | glutamine-fructose-6-phosphate tra    | GFPT2          | 0.999891  | 1126.5  |
| ENSGALT0000 | GDNF family receptor alpha 1          | GFRA1          | 0.935135  | 799     |
| ENSGALT0000 | GDNF family receptor alpha 2          | GFRA2          | 0.878004  | 348.5   |
| ENSGALT0000 | GDNF family receptor alpha 3          | GFRA3          | 0.765092  | 7.5     |
| ENSGALT0000 | GDNF family receptor alpha 4          | GFRA4          | 0.866139  | 268.5   |
| ENSGALT0000 | GDNF family receptor alpha like       | GFRAL          | 0.0441942 | 0       |
| ENSGALT0000 | golgi-associated, gamma adaptin e     | GGA1           | 0.963761  | 2113    |
| ENSGALT0000 | golgi-associated, gamma adaptin e     | GGA2           | 0.960769  | 437     |
| ENSGALT0000 | golgi-associated, gamma adaptin e     | GGA3           | 0.973763  | 1947    |
| ENSGALT0000 | gga-let-7a-1                          | gga-let-7a-1   | ?         | 0       |
| ENSGALT0000 | gga-let-7a-2                          | gga-let-7a-2   | ?         | 0       |
| ENSGALT0000 | gga-let-7a-3                          | gga-let-7a-3   | ?         | 0       |
| ENSGALT0000 | gga-let-7b                            | gga-let-7b     | 0.722096  | 0.5     |
| ENSGALT0000 | gga-let-7c                            | gga-let-7c     | ?         | 0       |
| ENSGALT0000 | gga-let-7d                            | gga-let-7d     | 0.983555  | 53      |
| ENSGALT0000 | gga-let-7f                            | gga-let-7f     | 0.639897  | 0       |
| ENSGALT0000 | gga-let-7g                            | gga-let-7g     | ?         | 0       |
| ENSGALT0000 | gga-let-7i                            | gga-let-7i     | 0.289928  | 3.5     |
| ENSGALT0000 | gga-let-7j                            | gga-let-7j     | 0.464758  | 0       |
| ENSGALT0000 | gga-let-7k                            | gga-let-7k     | ?         | 0       |
| ENSGALT0000 | gga-mir-100                           | gga-mir-100    | 0.464758  | 0.5     |
| ENSGALT0000 | gga-mir-101                           | gga-mir-101    | ?         | 0       |
| ENSGALT0000 | gga-mir-101-2                         | gga-mir-101-2  | 0.603682  | 1       |
| ENSGALT0000 | gga-mir-103-1                         | gga-mir-103-1  | ?         | 0       |
| ENSGALT0000 | gga-mir-103-2                         | gga-mir-103-2  | ?         | 0       |
| ENSGALT0000 | gga-mir-106                           | gga-mir-106    | ?         | 0       |
| ENSGALT0000 | gga-mir-107                           | gga-mir-107    | 0.464758  | 0       |
| ENSGALT0000 | gga-mir-10a                           | gga-mir-10a    | ?         | 0       |
| ENSGALT0000 | gga-mir-10b                           | gga-mir-10b    | ?         | 0       |
| ENSGALT0000 | gga-mir-122-1                         | gga-mir-122-1  | ?         | 0       |
| ENSGALT0000 | gga-mir-122-2                         | gga-mir-122-2  | ?         | 0       |
| ENSGALT0000 | gga-mir-124a                          | gga-mir-124a   | 0.649519  | 0.5     |
| ENSGALT0000 | gga-mir-124a-2                        | gga-mir-124a-2 | ?         | 0       |
| ENSGALT0000 | gga-mir-124b-1                        | gga-mir-124b-1 | 0.649519  | 0       |

|                            |                |          |          |
|----------------------------|----------------|----------|----------|
| ENSGALT0000 gga-mir-125b   | gga-mir-125b   | 0.649519 | 2        |
| ENSGALT0000 gga-mir-126    | gga-mir-126    | 0.464758 | 1.5      |
| ENSGALT0000 gga-mir-128-1  | gga-mir-128-1  | ?        | 0        |
| ENSGALT0000 gga-mir-128-2  | gga-mir-128-2  | ?        | 0        |
| ENSGALT0000 gga-mir-1306   | gga-mir-1306   | 0.46476  | 1.20E-07 |
| ENSGALT0000 gga-mir-130a   | gga-mir-130a   | ?        | 0        |
| ENSGALT0000 gga-mir-130b   | gga-mir-130b   | 0.957472 | 7.5      |
| ENSGALT0000 gga-mir-130c   | gga-mir-130c   | ?        | 0        |
| ENSGALT0000 gga-mir-1329   | gga-mir-1329   | ?        | 0        |
| ENSGALT0000 gga-mir-133a-1 | gga-mir-133a-1 | 0.464758 | 0        |
| ENSGALT0000 gga-mir-133a-2 | gga-mir-133a-2 | ?        | 0        |
| ENSGALT0000 gga-mir-133b   | gga-mir-133b   | ?        | 0        |
| ENSGALT0000 gga-mir-133c   | gga-mir-133c   | 0.464758 | 0        |
| ENSGALT0000 gga-mir-1354   | gga-mir-1354   | ?        | 0        |
| ENSGALT0000 gga-mir-135a-1 | gga-mir-135a-1 | 0.464758 | 0        |
| ENSGALT0000 gga-mir-135a-2 | gga-mir-135a-2 | 0.649519 | 0        |
| ENSGALT0000 gga-mir-135a-3 | gga-mir-135a-3 | ?        | 0        |
| ENSGALT0000 gga-mir-137    | gga-mir-137    | 0.479357 | 5.5      |
| ENSGALT0000 gga-mir-138-1  | gga-mir-138-1  | 0.464758 | 0        |
| ENSGALT0000 gga-mir-138-2  | gga-mir-138-2  | 0.904804 | 1.5      |
| ENSGALT0000 gga-mir-1397   | gga-mir-1397   | ?        | 0        |
| ENSGALT0000 gga-mir-140    | gga-mir-140    | 0.464758 | 0.5      |
| ENSGALT0000 gga-mir-1416   | gga-mir-1416   | ?        | 0        |
| ENSGALT0000 gga-mir-142    | gga-mir-142    | ?        | 0        |
| ENSGALT0000 gga-mir-144    | gga-mir-144    | 0.464758 | 0        |
| ENSGALT0000 gga-mir-1451   | gga-mir-1451   | 0.464758 | 0        |
| ENSGALT0000 gga-mir-1452   | gga-mir-1452   | ?        | 0        |
| ENSGALT0000 gga-mir-1453   | gga-mir-1453   | 0.464758 | 0.5      |
| ENSGALT0000 gga-mir-1456   | gga-mir-1456   | 0.534404 | 4.5      |
| ENSGALT0000 gga-mir-1457   | gga-mir-1457   | ?        | 0        |
| ENSGALT0000 gga-mir-1458   | gga-mir-1458   | ?        | 0        |
| ENSGALT0000 gga-mir-1460   | gga-mir-1460   | 0.464758 | 0        |
| ENSGALT0000 gga-mir-1462   | gga-mir-1462   | ?        | 0        |
| ENSGALT0000 gga-mir-1463   | gga-mir-1463   | ?        | 0        |
| ENSGALT0000 gga-mir-1464   | gga-mir-1464   | 0.590316 | 1.5      |
| ENSGALT0000 gga-mir-1465   | gga-mir-1465   | 0.828826 | 1        |
| ENSGALT0000 gga-mir-1466   | gga-mir-1466   | ?        | 6.65E-18 |
| ENSGALT0000 gga-mir-1467   | gga-mir-1467   | 0        | 1        |
| ENSGALT0000 gga-mir-146a   | gga-mir-146a   | ?        | 0        |
| ENSGALT0000 gga-mir-146b   | gga-mir-146b   | ?        | 0        |
| ENSGALT0000 gga-mir-146c   | gga-mir-146c   | 0.603682 | 0.5      |
| ENSGALT0000 gga-mir-147-1  | gga-mir-147-1  | ?        | 0        |
| ENSGALT0000 gga-mir-148a   | gga-mir-148a   | ?        | 0        |
| ENSGALT0000 gga-mir-153    | gga-mir-153    | ?        | 0        |
| ENSGALT0000 gga-mir-155    | gga-mir-155    | ?        | 0        |
| ENSGALT0000 gga-mir-1550   | gga-mir-1550   | ?        | 0        |
| ENSGALT0000 gga-mir-1551   | gga-mir-1551   | 0.464758 | 0        |
| ENSGALT0000 gga-mir-1552   | gga-mir-1552   | 0.562993 | 0.5      |
| ENSGALT0000 gga-mir-1553   | gga-mir-1553   | 0.464758 | 1        |
| ENSGALT0000 gga-mir-1554   | gga-mir-1554   | ?        | 0        |
| ENSGALT0000 gga-mir-1555   | gga-mir-1555   | 0.865626 | 42.5     |
| ENSGALT0000 gga-mir-1556   | gga-mir-1556   | 0.603682 | 0        |
| ENSGALT0000 gga-mir-1557   | gga-mir-1557   | ?        | 0        |
| ENSGALT0000 gga-mir-1558   | gga-mir-1558   | ?        | 0        |
| ENSGALT0000 gga-mir-1559   | gga-mir-1559   | 0.464758 | 0        |
| ENSGALT0000 gga-mir-1560   | gga-mir-1560   | ?        | 0        |

|                            |                |           |          |
|----------------------------|----------------|-----------|----------|
| ENSGALT0000 gga-mir-1561   | gga-mir-1561   | 0.649519  | 0        |
| ENSGALT0000 gga-mir-1562   | gga-mir-1562   | 0.79915   | 5        |
| ENSGALT0000 gga-mir-1564   | gga-mir-1564   | 0.631804  | 17.5     |
| ENSGALT0000 gga-mir-1565   | gga-mir-1565   | 0.464758  | 0        |
| ENSGALT0000 gga-mir-1566   | gga-mir-1566   | ?         | 0        |
| ENSGALT0000 gga-mir-1567   | gga-mir-1567   | ?         | 0        |
| ENSGALT0000 gga-mir-1568   | gga-mir-1568   | ?         | 0        |
| ENSGALT0000 gga-mir-1570   | gga-mir-1570   | ?         | 0        |
| ENSGALT0000 gga-mir-1571   | gga-mir-1571   | 0.988484  | 5        |
| ENSGALT0000 gga-mir-1572   | gga-mir-1572   | 0.464758  | 0        |
| ENSGALT0000 gga-mir-1573   | gga-mir-1573   | ?         | 0        |
| ENSGALT0000 gga-mir-1574   | gga-mir-1574   | ?         | 0        |
| ENSGALT0000 gga-mir-1575   | gga-mir-1575   | 0.464758  | 0        |
| ENSGALT0000 gga-mir-1576   | gga-mir-1576   | 0.649519  | 0        |
| ENSGALT0000 gga-mir-1577   | gga-mir-1577   | 0.603682  | 2        |
| ENSGALT0000 gga-mir-1578   | gga-mir-1578   | 0.904804  | 1.5      |
| ENSGALT0000 gga-mir-1579   | gga-mir-1579   | 0.0441942 | 0.5      |
| ENSGALT0000 gga-mir-1580   | gga-mir-1580   | 0.464758  | 0.5      |
| ENSGALT0000 gga-mir-1581   | gga-mir-1581   | 0.353553  | 0        |
| ENSGALT0000 gga-mir-1582   | gga-mir-1582   | 0.464758  | 0        |
| ENSGALT0000 gga-mir-1583   | gga-mir-1583   | 0.748346  | 2        |
| ENSGALT0000 gga-mir-1584   | gga-mir-1584   | ?         | 0        |
| ENSGALT0000 gga-mir-1585   | gga-mir-1585   | ?         | 0        |
| ENSGALT0000 gga-mir-1586   | gga-mir-1586   | 0.943934  | 1.5      |
| ENSGALT0000 gga-mir-1587   | gga-mir-1587   | 0.775034  | 3.5      |
| ENSGALT0000 gga-mir-1588   | gga-mir-1588   | ?         | 0        |
| ENSGALT0000 gga-mir-1589   | gga-mir-1589   | 0.562993  | 0        |
| ENSGALT0000 gga-mir-1590   | gga-mir-1590   | ?         | 0        |
| ENSGALT0000 gga-mir-1591   | gga-mir-1591   | ?         | 0        |
| ENSGALT0000 gga-mir-1592   | gga-mir-1592   | 0.464758  | 0        |
| ENSGALT0000 gga-mir-1593   | gga-mir-1593   | 0.649519  | 0.5      |
| ENSGALT0000 gga-mir-1594   | gga-mir-1594   | ?         | 0        |
| ENSGALT0000 gga-mir-1595   | gga-mir-1595   | 0.464758  | 0        |
| ENSGALT0000 gga-mir-1596   | gga-mir-1596   | ?         | 0        |
| ENSGALT0000 gga-mir-1597   | gga-mir-1597   | 0.464758  | 0        |
| ENSGALT0000 gga-mir-1598   | gga-mir-1598   | 0.722096  | 0.5      |
| ENSGALT0000 gga-mir-1599   | gga-mir-1599   | ?         | 0        |
| ENSGALT0000 gga-mir-15a    | gga-mir-15a    | ?         | 0        |
| ENSGALT0000 gga-mir-15b    | gga-mir-15b    | 0.464758  | 0        |
| ENSGALT0000 gga-mir-15c    | gga-mir-15c    | 0.857288  | 8        |
| ENSGALT0000 gga-mir-1600   | gga-mir-1600   | 0.859062  | 22.5     |
| ENSGALT0000 gga-mir-1601   | gga-mir-1601   | ?         | 0        |
| ENSGALT0000 gga-mir-1602   | gga-mir-1602   | ?         | 0        |
| ENSGALT0000 gga-mir-1603   | gga-mir-1603   | 0.464758  | 2.53E-16 |
| ENSGALT0000 gga-mir-1604   | gga-mir-1604   | 0.464758  | 0        |
| ENSGALT0000 gga-mir-1605   | gga-mir-1605   | ?         | 0        |
| ENSGALT0000 gga-mir-1606   | gga-mir-1606   | 0.464758  | 0        |
| ENSGALT0000 gga-mir-1607   | gga-mir-1607   | 0.0503556 | 0        |
| ENSGALT0000 gga-mir-1608   | gga-mir-1608   | 0.91235   | 2.5      |
| ENSGALT0000 gga-mir-1609-1 | gga-mir-1609-1 | 0.464758  | 0        |
| ENSGALT0000 gga-mir-16-1   | gga-mir-16-1   | ?         | 0        |
| ENSGALT0000 gga-mir-1610   | gga-mir-1610   | 0.377563  | 4.5      |
| ENSGALT0000 gga-mir-1611   | gga-mir-1611   | 0.46476   | 1        |
| ENSGALT0000 gga-mir-1612   | gga-mir-1612   | ?         | 0        |
| ENSGALT0000 gga-mir-1613-1 | gga-mir-1613-1 | ?         | 0        |
| ENSGALT0000 gga-mir-1614   | gga-mir-1614   | ?         | 0        |

|                            |                |          |       |
|----------------------------|----------------|----------|-------|
| ENSGALT0000 gga-mir-1615   | gga-mir-1615   | 0.776616 | 1     |
| ENSGALT0000 gga-mir-1616   | gga-mir-1616   | ?        | 0     |
| ENSGALT0000 gga-mir-1617   | gga-mir-1617   | ?        | 0     |
| ENSGALT0000 gga-mir-1618   | gga-mir-1618   | 0.464758 | 0     |
| ENSGALT0000 gga-mir-1619   | gga-mir-1619   | ?        | 0     |
| ENSGALT0000 gga-mir-16-2   | gga-mir-16-2   | ?        | 0     |
| ENSGALT0000 gga-mir-1620   | gga-mir-1620   | ?        | 0     |
| ENSGALT0000 gga-mir-1621   | gga-mir-1621   | ?        | 0     |
| ENSGALT0000 gga-mir-1622   | gga-mir-1622   | ?        | 0     |
| ENSGALT0000 gga-mir-1623   | gga-mir-1623   | ?        | 0     |
| ENSGALT0000 gga-mir-1624   | gga-mir-1624   | 0.562993 | 0.5   |
| ENSGALT0000 gga-mir-1625   | gga-mir-1625   | 0.464758 | 0     |
| ENSGALT0000 gga-mir-1626   | gga-mir-1626   | 0.464758 | 0     |
| ENSGALT0000 gga-mir-1627   | gga-mir-1627   | 0.730283 | 12.5  |
| ENSGALT0000 gga-mir-1628   | gga-mir-1628   | 0.603682 | 0     |
| ENSGALT0000 gga-mir-1629   | gga-mir-1629   | 0.722096 | 1.5   |
| ENSGALT0000 gga-mir-1630   | gga-mir-1630   | ?        | 0     |
| ENSGALT0000 gga-mir-1631   | gga-mir-1631   | 0.964074 | 8     |
| ENSGALT0000 gga-mir-1632   | gga-mir-1632   | ?        | 0     |
| ENSGALT0000 gga-mir-1633   | gga-mir-1633   | 0.8762   | 10    |
| ENSGALT0000 gga-mir-1634   | gga-mir-1634   | 0.534478 | 1     |
| ENSGALT0000 gga-mir-1635   | gga-mir-1635   | 0.464758 | 0     |
| ENSGALT0000 gga-mir-1636   | gga-mir-1636   | ?        | 0     |
| ENSGALT0000 gga-mir-1637   | gga-mir-1637   | ?        | 0     |
| ENSGALT0000 gga-mir-1640   | gga-mir-1640   | 0.603682 | 0     |
| ENSGALT0000 gga-mir-1641   | gga-mir-1641   | ?        | 0     |
| ENSGALT0000 gga-mir-1642   | gga-mir-1642   | ?        | 0     |
| ENSGALT0000 gga-mir-1643   | gga-mir-1643   | 0.464758 | 0     |
| ENSGALT0000 gga-mir-1644   | gga-mir-1644   | 0.464758 | 0     |
| ENSGALT0000 gga-mir-1645   | gga-mir-1645   | ?        | 0     |
| ENSGALT0000 gga-mir-1646   | gga-mir-1646   | 0.862425 | 1     |
| ENSGALT0000 gga-mir-1647   | gga-mir-1647   | 0.984633 | 46.5  |
| ENSGALT0000 gga-mir-1648   | gga-mir-1648   | ?        | 0     |
| ENSGALT0000 gga-mir-1649   | gga-mir-1649   | ?        | 0     |
| ENSGALT0000 gga-mir-1650   | gga-mir-1650   | 0.886241 | 23    |
| ENSGALT0000 gga-mir-1651   | gga-mir-1651   | ?        | 0     |
| ENSGALT0000 gga-mir-1652   | gga-mir-1652   | 0.999009 | 100.5 |
| ENSGALT0000 gga-mir-1653   | gga-mir-1653   | 0.997559 | 36    |
| ENSGALT0000 gga-mir-1654-1 | gga-mir-1654-1 | ?        | 0     |
| ENSGALT0000 gga-mir-1655   | gga-mir-1655   | ?        | 0     |
| ENSGALT0000 gga-mir-1656   | gga-mir-1656   | ?        | 0     |
| ENSGALT0000 gga-mir-1657   | gga-mir-1657   | ?        | 0     |
| ENSGALT0000 gga-mir-1658   | gga-mir-1658   | 0.649519 | 0.5   |
| ENSGALT0000 gga-mir-1659   | gga-mir-1659   | ?        | 0     |
| ENSGALT0000 gga-mir-1661   | gga-mir-1661   | 0.562993 | 0     |
| ENSGALT0000 gga-mir-1662   | gga-mir-1662   | ?        | 0     |
| ENSGALT0000 gga-mir-1663   | gga-mir-1663   | 0.464758 | 2     |
| ENSGALT0000 gga-mir-1664   | gga-mir-1664   | ?        | 0     |
| ENSGALT0000 gga-mir-1665   | gga-mir-1665   | ?        | 0     |
| ENSGALT0000 gga-mir-1666   | gga-mir-1666   | ?        | 0     |
| ENSGALT0000 gga-mir-1667   | gga-mir-1667   | ?        | 0     |
| ENSGALT0000 gga-mir-1668   | gga-mir-1668   | 0.464758 | 0     |
| ENSGALT0000 gga-mir-1669   | gga-mir-1669   | ?        | 0     |
| ENSGALT0000 gga-mir-1670   | gga-mir-1670   | 1        | 0.5   |
| ENSGALT0000 gga-mir-1671   | gga-mir-1671   | 0.464758 | 0     |
| ENSGALT0000 gga-mir-1672   | gga-mir-1672   | ?        | 0     |

|                            |                |          |       |
|----------------------------|----------------|----------|-------|
| ENSGALT0000 gga-mir-1673   | gga-mir-1673   | 0.464758 | 0     |
| ENSGALT0000 gga-mir-1674   | gga-mir-1674   | 0.973393 | 4.5   |
| ENSGALT0000 gga-mir-1675   | gga-mir-1675   | 0.534404 | 1     |
| ENSGALT0000 gga-mir-1676   | gga-mir-1676   | ?        | 0     |
| ENSGALT0000 gga-mir-1677   | gga-mir-1677   | 0.464758 | 0     |
| ENSGALT0000 gga-mir-1678   | gga-mir-1678   | ?        | 0     |
| ENSGALT0000 gga-mir-1679   | gga-mir-1679   | 0.562993 | 0     |
| ENSGALT0000 gga-mir-1680   | gga-mir-1680   | 0.649519 | 0.5   |
| ENSGALT0000 gga-mir-1681   | gga-mir-1681   | ?        | 0     |
| ENSGALT0000 gga-mir-1682   | gga-mir-1682   | 0.9299   | 4     |
| ENSGALT0000 gga-mir-1683   | gga-mir-1683   | 0.943147 | 17    |
| ENSGALT0000 gga-mir-1684   | gga-mir-1684   | 0.464758 | 0     |
| ENSGALT0000 gga-mir-1685   | gga-mir-1685   | 1        | 1.5   |
| ENSGALT0000 gga-mir-1686   | gga-mir-1686   | 0.740073 | 2     |
| ENSGALT0000 gga-mir-1687   | gga-mir-1687   | ?        | 0     |
| ENSGALT0000 gga-mir-1688   | gga-mir-1688   | ?        | 0     |
| ENSGALT0000 gga-mir-1689   | gga-mir-1689   | 0.932599 | 1.5   |
| ENSGALT0000 gga-mir-1690   | gga-mir-1690   | ?        | 0     |
| ENSGALT0000 gga-mir-1691   | gga-mir-1691   | ?        | 0     |
| ENSGALT0000 gga-mir-1693   | gga-mir-1693   | ?        | 0     |
| ENSGALT0000 gga-mir-1694   | gga-mir-1694   | ?        | 0     |
| ENSGALT0000 gga-mir-1695   | gga-mir-1695   | ?        | 0     |
| ENSGALT0000 gga-mir-1696   | gga-mir-1696   | ?        | 0     |
| ENSGALT0000 gga-mir-1697   | gga-mir-1697   | 0.818488 | 1.5   |
| ENSGALT0000 gga-mir-1698   | gga-mir-1698   | 0.829873 | 9     |
| ENSGALT0000 gga-mir-1699   | gga-mir-1699   | 0.464758 | 0.5   |
| ENSGALT0000 gga-mir-16c    | gga-mir-16c    | 0.440774 | 4     |
| ENSGALT0000 gga-mir-17     | gga-mir-17     | ?        | 0     |
| ENSGALT0000 gga-mir-1700   | gga-mir-1700   | ?        | 0     |
| ENSGALT0000 gga-mir-1702   | gga-mir-1702   | 0.649519 | 0     |
| ENSGALT0000 gga-mir-1703   | gga-mir-1703   | ?        | 0     |
| ENSGALT0000 gga-mir-1704   | gga-mir-1704   | 0.649519 | 0.5   |
| ENSGALT0000 gga-mir-1705   | gga-mir-1705   | 0.603682 | 0.5   |
| ENSGALT0000 gga-mir-1706   | gga-mir-1706   | 0.649519 | 0.5   |
| ENSGALT0000 gga-mir-1707   | gga-mir-1707   | 0.603682 | 1     |
| ENSGALT0000 gga-mir-1708   | gga-mir-1708   | ?        | 0     |
| ENSGALT0000 gga-mir-1709   | gga-mir-1709   | ?        | 0     |
| ENSGALT0000 gga-mir-1710   | gga-mir-1710   | 0.603682 | 0     |
| ENSGALT0000 gga-mir-1712   | gga-mir-1712   | ?        | 0     |
| ENSGALT0000 gga-mir-1713   | gga-mir-1713   | ?        | 0     |
| ENSGALT0000 gga-mir-1714   | gga-mir-1714   | 0.464758 | 0     |
| ENSGALT0000 gga-mir-1715   | gga-mir-1715   | 0.997585 | 32.5  |
| ENSGALT0000 gga-mir-1716   | gga-mir-1716   | ?        | 0     |
| ENSGALT0000 gga-mir-1717   | gga-mir-1717   | ?        | 0     |
| ENSGALT0000 gga-mir-1718   | gga-mir-1718   | ?        | 0     |
| ENSGALT0000 gga-mir-1719   | gga-mir-1719   | 0.649519 | 0.5   |
| ENSGALT0000 gga-mir-1720   | gga-mir-1720   | 1        | 0.5   |
| ENSGALT0000 gga-mir-1721   | gga-mir-1721   | ?        | 0     |
| ENSGALT0000 gga-mir-1722   | gga-mir-1722   | 0.603682 | 0.5   |
| ENSGALT0000 gga-mir-1723   | gga-mir-1723   | 0.975572 | 133.5 |
| ENSGALT0000 gga-mir-1724   | gga-mir-1724   | ?        | 0     |
| ENSGALT0000 gga-mir-1726   | gga-mir-1726   | 0.649519 | 0     |
| ENSGALT0000 gga-mir-1727-1 | gga-mir-1727-1 | 0.464758 | 0     |
| ENSGALT0000 gga-mir-1728   | gga-mir-1728   | 0.623826 | 7     |
| ENSGALT0000 gga-mir-1729   | gga-mir-1729   | ?        | 0     |
| ENSGALT0000 gga-mir-1730   | gga-mir-1730   | 0.464758 | 0.5   |



|                            |                |          |     |
|----------------------------|----------------|----------|-----|
| ENSGALT0000 gga-mir-1731   | gga-mir-1731   | ?        | 0   |
| ENSGALT0000 gga-mir-1732   | gga-mir-1732   | ?        | 0   |
| ENSGALT0000 gga-mir-1733   | gga-mir-1733   | ?        | 0   |
| ENSGALT0000 gga-mir-1734   | gga-mir-1734   | ?        | 0   |
| ENSGALT0000 gga-mir-1735   | gga-mir-1735   | 0.464758 | 0   |
| ENSGALT0000 gga-mir-1736   | gga-mir-1736   | ?        | 0   |
| ENSGALT0000 gga-mir-1737   | gga-mir-1737   | 0.662104 | 4.5 |
| ENSGALT0000 gga-mir-1738   | gga-mir-1738   | ?        | 0   |
| ENSGALT0000 gga-mir-1739   | gga-mir-1739   | 0.464758 | 0   |
| ENSGALT0000 gga-mir-1740   | gga-mir-1740   | 0.603682 | 1   |
| ENSGALT0000 gga-mir-1741   | gga-mir-1741   | ?        | 0   |
| ENSGALT0000 gga-mir-1742   | gga-mir-1742   | 0.361744 | 0.5 |
| ENSGALT0000 gga-mir-1743   | gga-mir-1743   | 0.464758 | 0.5 |
| ENSGALT0000 gga-mir-1744   | gga-mir-1744   | 0.684597 | 3   |
| ENSGALT0000 gga-mir-1745-1 | gga-mir-1745-1 | ?        | 0   |
| ENSGALT0000 gga-mir-1745-1 | gga-mir-1745-2 | ?        | 0   |
| ENSGALT0000 gga-mir-1746   | gga-mir-1746   | ?        | 0   |
| ENSGALT0000 gga-mir-1747   | gga-mir-1747   | 0.649519 | 0.5 |
| ENSGALT0000 gga-mir-1748   | gga-mir-1748   | 0.780657 | 0.5 |
| ENSGALT0000 gga-mir-1749   | gga-mir-1749   | 0.562993 | 0   |
| ENSGALT0000 gga-mir-1750   | gga-mir-1750   | ?        | 0   |
| ENSGALT0000 gga-mir-1751   | gga-mir-1751   | 0.464758 | 0.5 |
| ENSGALT0000 gga-mir-1752   | gga-mir-1752   | 0.464758 | 0   |
| ENSGALT0000 gga-mir-1753-1 | gga-mir-1753-1 | ?        | 0   |
| ENSGALT0000 gga-mir-1754   | gga-mir-1754   | 0.464758 | 0   |
| ENSGALT0000 gga-mir-1755   | gga-mir-1755   | 0.749343 | 1   |
| ENSGALT0000 gga-mir-1756a  | gga-mir-1756a  | 0.603682 | 0.5 |
| ENSGALT0000 gga-mir-1756b  | gga-mir-1756b  | ?        | 0   |
| ENSGALT0000 gga-mir-1757   | gga-mir-1757   | 0.464758 | 0   |
| ENSGALT0000 gga-mir-1759   | gga-mir-1759   | ?        | 0   |
| ENSGALT0000 gga-mir-1760   | gga-mir-1760   | 0.464758 | 0.5 |
| ENSGALT0000 gga-mir-1762   | gga-mir-1762   | ?        | 0   |
| ENSGALT0000 gga-mir-1763   | gga-mir-1763   | ?        | 0   |
| ENSGALT0000 gga-mir-1764   | gga-mir-1764   | 0.261655 | 1   |
| ENSGALT0000 gga-mir-1765   | gga-mir-1765   | 0.603682 | 0   |
| ENSGALT0000 gga-mir-1766-1 | gga-mir-1766-1 | ?        | 0   |
| ENSGALT0000 gga-mir-1766-2 | gga-mir-1766-2 | ?        | 0   |
| ENSGALT0000 gga-mir-1767   | gga-mir-1767   | ?        | 0   |
| ENSGALT0000 gga-mir-1768   | gga-mir-1768   | 0.464758 | 0   |
| ENSGALT0000 gga-mir-1769   | gga-mir-1769   | ?        | 0   |
| ENSGALT0000 gga-mir-1770   | gga-mir-1770   | 0.722096 | 1.5 |
| ENSGALT0000 gga-mir-1771   | gga-mir-1771   | 0.464758 | 0   |
| ENSGALT0000 gga-mir-1772   | gga-mir-1772   | 0.722096 | 1   |
| ENSGALT0000 gga-mir-1773   | gga-mir-1773   | ?        | 0   |
| ENSGALT0000 gga-mir-1774   | gga-mir-1774   | 0.846336 | 1.5 |
| ENSGALT0000 gga-mir-1775   | gga-mir-1775   | ?        | 0   |
| ENSGALT0000 gga-mir-1776   | gga-mir-1776   | ?        | 0   |
| ENSGALT0000 gga-mir-1777   | gga-mir-1777   | ?        | 0   |
| ENSGALT0000 gga-mir-1778   | gga-mir-1778   | 0.902354 | 8.5 |
| ENSGALT0000 gga-mir-1779   | gga-mir-1779   | ?        | 0   |
| ENSGALT0000 gga-mir-1780   | gga-mir-1780   | 0.353553 | 1   |
| ENSGALT0000 gga-mir-1781   | gga-mir-1781   | 0.603682 | 1   |
| ENSGALT0000 gga-mir-1782   | gga-mir-1782   | ?        | 0   |
| ENSGALT0000 gga-mir-1783   | gga-mir-1783   | 0.603682 | 0   |
| ENSGALT0000 gga-mir-1784   | gga-mir-1784   | ?        | 0   |
| ENSGALT0000 gga-mir-1785   | gga-mir-1785   | ?        | 0   |

|                            |                |          |     |
|----------------------------|----------------|----------|-----|
| ENSGALT0000 gga-mir-1786   | gga-mir-1786   | ?        | 0   |
| ENSGALT0000 gga-mir-1787   | gga-mir-1787   | 0.917894 | 21  |
| ENSGALT0000 gga-mir-1788   | gga-mir-1788   | ?        | 0   |
| ENSGALT0000 gga-mir-1789   | gga-mir-1789   | ?        | 0   |
| ENSGALT0000 gga-mir-1790   | gga-mir-1790   | 0.942866 | 2   |
| ENSGALT0000 gga-mir-1791   | gga-mir-1791   | 0.464758 | 0   |
| ENSGALT0000 gga-mir-1792   | gga-mir-1792   | ?        | 0   |
| ENSGALT0000 gga-mir-1793   | gga-mir-1793   | ?        | 0   |
| ENSGALT0000 gga-mir-1794   | gga-mir-1794   | ?        | 0   |
| ENSGALT0000 gga-mir-1795   | gga-mir-1795   | 0.464758 | 0.5 |
| ENSGALT0000 gga-mir-1796   | gga-mir-1796   | ?        | 0   |
| ENSGALT0000 gga-mir-1797   | gga-mir-1797   | 0.878854 | 18  |
| ENSGALT0000 gga-mir-1798   | gga-mir-1798   | ?        | 0   |
| ENSGALT0000 gga-mir-1799   | gga-mir-1799   | ?        | 0   |
| ENSGALT0000 gga-mir-1800   | gga-mir-1800   | 0.995234 | 4.5 |
| ENSGALT0000 gga-mir-1801   | gga-mir-1801   | ?        | 0   |
| ENSGALT0000 gga-mir-1802   | gga-mir-1802   | ?        | 0   |
| ENSGALT0000 gga-mir-1803   | gga-mir-1803   | ?        | 0   |
| ENSGALT0000 gga-mir-1804   | gga-mir-1804   | 0.601558 | 0.5 |
| ENSGALT0000 gga-mir-1805   | gga-mir-1805   | ?        | 0   |
| ENSGALT0000 gga-mir-1806   | gga-mir-1806   | ?        | 0   |
| ENSGALT0000 gga-mir-1807   | gga-mir-1807   | ?        | 0   |
| ENSGALT0000 gga-mir-1808   | gga-mir-1808   | 0.464758 | 0.5 |
| ENSGALT0000 gga-mir-1809   | gga-mir-1809   | 0.464758 | 0   |
| ENSGALT0000 gga-mir-1810   | gga-mir-1810   | ?        | 0   |
| ENSGALT0000 gga-mir-1811   | gga-mir-1811   | ?        | 0   |
| ENSGALT0000 gga-mir-1812   | gga-mir-1812   | 0.464758 | 0   |
| ENSGALT0000 gga-mir-1813-1 | gga-mir-1813-1 | ?        | 0   |
| ENSGALT0000 gga-mir-1813-2 | gga-mir-1813-2 | ?        | 0   |
| ENSGALT0000 gga-mir-1815   | gga-mir-1815   | ?        | 0   |
| ENSGALT0000 gga-mir-1816   | gga-mir-1816   | ?        | 0   |
| ENSGALT0000 gga-mir-181a-1 | gga-mir-181a-1 | ?        | 0   |
| ENSGALT0000 gga-mir-181a-2 | gga-mir-181a-2 | ?        | 0   |
| ENSGALT0000 gga-mir-181b-1 | gga-mir-181b-1 | 0.872443 | 1.5 |
| ENSGALT0000 gga-mir-181b-2 | gga-mir-181b-2 | 0.989779 | 3.5 |
| ENSGALT0000 gga-mir-183    | gga-mir-183    | 0.603682 | 1   |
| ENSGALT0000 gga-mir-184    | gga-mir-184    | ?        | 0   |
| ENSGALT0000 gga-mir-1845   | gga-mir-1845   | 0.464758 | 0   |
| ENSGALT0000 gga-mir-187    | gga-mir-187    | ?        | 0   |
| ENSGALT0000 gga-mir-18a    | gga-mir-18a    | ?        | 0   |
| ENSGALT0000 gga-mir-18b    | gga-mir-18b    | 0.464758 | 0   |
| ENSGALT0000 gga-mir-190    | gga-mir-190    | ?        | 0   |
| ENSGALT0000 gga-mir-193a   | gga-mir-193a   | ?        | 0   |
| ENSGALT0000 gga-mir-193b   | gga-mir-193b   | 0.464758 | 0.5 |
| ENSGALT0000 gga-mir-194    | gga-mir-194    | ?        | 0   |
| ENSGALT0000 gga-mir-196-1  | gga-mir-196-1  | ?        | 0   |
| ENSGALT0000 gga-mir-196-2  | gga-mir-196-2  | ?        | 0   |
| ENSGALT0000 gga-mir-196-3  | gga-mir-196-3  | ?        | 0   |
| ENSGALT0000 gga-mir-199-1  | gga-mir-199-1  | 0.19245  | 0.5 |
| ENSGALT0000 gga-mir-199-2  | gga-mir-199-2  | 0.649519 | 0.5 |
| ENSGALT0000 gga-mir-199b   | gga-mir-199b   | ?        | 0   |
| ENSGALT0000 gga-mir-19a    | gga-mir-19a    | ?        | 0   |
| ENSGALT0000 gga-mir-19b    | gga-mir-19b    | 0.464758 | 0   |
| ENSGALT0000 gga-mir-1a-1   | gga-mir-1a-1   | ?        | 0   |
| ENSGALT0000 gga-mir-1a-2   | gga-mir-1a-2   | ?        | 0   |
| ENSGALT0000 gga-mir-1b     | gga-mir-1b     | ?        | 0   |

|                           |               |          |      |
|---------------------------|---------------|----------|------|
| ENSGALT0000 gga-mir-200a  | gga-mir-200a  | ?        | 0    |
| ENSGALT0000 gga-mir-200b  | gga-mir-200b  | ?        | 0    |
| ENSGALT0000 gga-mir-202   | gga-mir-202   | ?        | 0    |
| ENSGALT0000 gga-mir-203   | gga-mir-203   | ?        | 0    |
| ENSGALT0000 gga-mir-204-2 | gga-mir-204-2 | 0.464758 | 0    |
| ENSGALT0000 gga-mir-205a  | gga-mir-205a  | ?        | 0    |
| ENSGALT0000 gga-mir-205b  | gga-mir-205b  | ?        | 0    |
| ENSGALT0000 gga-mir-206   | gga-mir-206   | ?        | 0    |
| ENSGALT0000 gga-mir-20a   | gga-mir-20a   | ?        | 0    |
| ENSGALT0000 gga-mir-20b   | gga-mir-20b   | 0.649519 | 0.5  |
| ENSGALT0000 gga-mir-21    | gga-mir-21    | 0.603682 | 1    |
| ENSGALT0000 gga-mir-211   | gga-mir-211   | ?        | 0    |
| ENSGALT0000 gga-mir-2126  | gga-mir-2126  | 0.507614 | 20.5 |
| ENSGALT0000 gga-mir-2127  | gga-mir-2127  | 0.353553 | 0    |
| ENSGALT0000 gga-mir-2128  | gga-mir-2128  | 0.942866 | 1.5  |
| ENSGALT0000 gga-mir-2129  | gga-mir-2129  | 0.92197  | 19   |
| ENSGALT0000 gga-mir-2130  | gga-mir-2130  | ?        | 0    |
| ENSGALT0000 gga-mir-2131  | gga-mir-2131  | 0.464758 | 0    |
| ENSGALT0000 gga-mir-214   | gga-mir-214   | ?        | 0    |
| ENSGALT0000 gga-mir-215   | gga-mir-215   | ?        | 0    |
| ENSGALT0000 gga-mir-216   | gga-mir-216   | ?        | 0    |
| ENSGALT0000 gga-mir-216c  | gga-mir-216c  | ?        | 0    |
| ENSGALT0000 gga-mir-217   | gga-mir-217   | ?        | 0    |
| ENSGALT0000 gga-mir-218-2 | gga-mir-218-2 | ?        | 0    |
| ENSGALT0000 gga-mir-218-1 | gga-mir-218-3 | 0.464758 | 0.5  |
| ENSGALT0000 gga-mir-219   | gga-mir-219   | ?        | 0    |
| ENSGALT0000 gga-mir-22    | gga-mir-22    | 0.649519 | 0.5  |
| ENSGALT0000 gga-mir-221   | gga-mir-221   | 0.464758 | 0    |
| ENSGALT0000 gga-mir-222   | gga-mir-222   | ?        | 0    |
| ENSGALT0000 gga-mir-223   | gga-mir-223   | ?        | 0    |
| ENSGALT0000 gga-mir-23b   | gga-mir-23b   | ?        | 0    |
| ENSGALT0000 gga-mir-24    | gga-mir-24    | ?        | 0    |
| ENSGALT0000 gga-mir-26a   | gga-mir-26a   | ?        | 0    |
| ENSGALT0000 gga-mir-27b   | gga-mir-27b   | ?        | 0    |
| ENSGALT0000 gga-mir-29a   | gga-mir-29a   | ?        | 0    |
| ENSGALT0000 gga-mir-29b-1 | gga-mir-29b-1 | ?        | 0    |
| ENSGALT0000 gga-mir-29b-2 | gga-mir-29b-2 | 0.740073 | 1    |
| ENSGALT0000 gga-mir-29c   | gga-mir-29c   | 0.818488 | 1.5  |
| ENSGALT0000 gga-mir-301   | gga-mir-301   | 0.485412 | 2.5  |
| ENSGALT0000 gga-mir-301b  | gga-mir-301b  | ?        | 0    |
| ENSGALT0000 gga-mir-302a  | gga-mir-302a  | ?        | 0    |
| ENSGALT0000 gga-mir-302b  | gga-mir-302b  | ?        | 0    |
| ENSGALT0000 gga-mir-302c  | gga-mir-302c  | ?        | 0    |
| ENSGALT0000 gga-mir-302d  | gga-mir-302d  | ?        | 0    |
| ENSGALT0000 gga-mir-30a   | gga-mir-30a   | ?        | 0    |
| ENSGALT0000 gga-mir-30b   | gga-mir-30b   | 0.943934 | 2.5  |
| ENSGALT0000 gga-mir-30c-1 | gga-mir-30c-1 | ?        | 0    |
| ENSGALT0000 gga-mir-30c-2 | gga-mir-30c-2 | 0.464758 | 0    |
| ENSGALT0000 gga-mir-30d   | gga-mir-30d   | ?        | 0    |
| ENSGALT0000 gga-mir-30e   | gga-mir-30e   | 0.464758 | 0    |
| ENSGALT0000 gga-mir-31    | gga-mir-31    | ?        | 0    |
| ENSGALT0000 gga-mir-32    | gga-mir-32    | 0.976096 | 2    |
| ENSGALT0000 gga-mir-33-1  | gga-mir-33-1  | 0.464758 | 0    |
| ENSGALT0000 gga-mir-34a   | gga-mir-34a   | 0.562993 | 0    |
| ENSGALT0000 gga-mir-34b   | gga-mir-34b   | ?        | 0    |
| ENSGALT0000 gga-mir-34c   | gga-mir-34c   | ?        | 0    |

|             |                                     |               |          |          |
|-------------|-------------------------------------|---------------|----------|----------|
| ENSGALT0000 | gga-mir-365-1                       | gga-mir-365-1 | ?        | 0        |
| ENSGALT0000 | gga-mir-365-2                       | gga-mir-365-2 | 0.649519 | 0        |
| ENSGALT0000 | gga-mir-367                         | gga-mir-367   | ?        | 0        |
| ENSGALT0000 | gga-mir-375                         | gga-mir-375   | ?        | 0        |
| ENSGALT0000 | gga-mir-383                         | gga-mir-383   | ?        | 0        |
| ENSGALT0000 | gga-mir-429                         | gga-mir-429   | ?        | 0        |
| ENSGALT0000 | gga-mir-449                         | gga-mir-449   | ?        | 0        |
| ENSGALT0000 | gga-mir-449b                        | gga-mir-449b  | ?        | 0        |
| ENSGALT0000 | gga-mir-449c                        | gga-mir-449c  | ?        | 0        |
| ENSGALT0000 | gga-mir-451                         | gga-mir-451   | 0.464758 | 0        |
| ENSGALT0000 | gga-mir-454                         | gga-mir-454   | 0.19245  | 0        |
| ENSGALT0000 | gga-mir-455                         | gga-mir-455   | ?        | 0        |
| ENSGALT0000 | gga-mir-456                         | gga-mir-456   | ?        | 0        |
| ENSGALT0000 | gga-mir-458                         | gga-mir-458   | ?        | 0        |
| ENSGALT0000 | gga-mir-460                         | gga-mir-460   | ?        | 0        |
| ENSGALT0000 | gga-mir-460b                        | gga-mir-460b  | ?        | 0        |
| ENSGALT0000 | gga-mir-466                         | gga-mir-466   | ?        | 0        |
| ENSGALT0000 | gga-mir-489                         | gga-mir-489   | ?        | 0        |
| ENSGALT0000 | gga-mir-490                         | gga-mir-490   | ?        | 0        |
| ENSGALT0000 | gga-mir-499                         | gga-mir-499   | ?        | 0        |
| ENSGALT0000 | gga-mir-551                         | gga-mir-551   | ?        | 0        |
| ENSGALT0000 | gga-mir-7-1                         | gga-mir-7-1   | 0.783262 | 1.5      |
| ENSGALT0000 | gga-mir-7-2                         | gga-mir-7-2   | 1        | 0.5      |
| ENSGALT0000 | gga-mir-7-3                         | gga-mir-7-3   | ?        | 0        |
| ENSGALT0000 | gga-mir-757-1                       | gga-mir-757-1 | ?        | 0        |
| ENSGALT0000 | gga-mir-762                         | gga-mir-762   | 0.591263 | 7.80E-10 |
| ENSGALT0000 | gga-mir-7b                          | gga-mir-7b    | ?        | 0        |
| ENSGALT0000 | gga-mir-9-1                         | gga-mir-9-1   | ?        | 0        |
| ENSGALT0000 | gga-mir-92                          | gga-mir-92    | 0.874724 | 3.5      |
| ENSGALT0000 | gga-mir-9-2                         | gga-mir-9-2   | 0.464758 | 0        |
| ENSGALT0000 | gga-mir-99a                         | gga-mir-99a   | ?        | 0        |
| ENSGALT0000 | chemokine-like ligand 1             | GGCL1         | ?        | 0        |
| ENSGALT0000 | gamma-glutamylcyclotransferase      | GGCT          | 0.44735  | 399.5    |
| ENSGALT0000 | gamma-glutamyl hydrolase (conjug    | GGH           | 0.990269 | 807.5    |
| ENSGALT0000 | gametogenetin binding protein 2     | GGNBP2        | 0.954387 | 707.003  |
| ENSGALT0000 | gamma-glutamyltransferase 1         | GGT1          | 0.991722 | 72.5     |
| ENSGALT0000 | gamma-glutamyltransferase 5         | GGT5          | 0.86823  | 235.5    |
| ENSGALT0000 | gamma-glutamyltransferase 7         | GGT7          | 0.890588 | 417.5    |
| ENSGALT0000 | growth hormone 1                    | GH            | 0.937361 | 89       |
| ENSGALT0000 | GH3 domain containing               | GHDC          | 0.979124 | 528      |
| ENSGALT0000 | hypothetical protein LOC423621      | GHITM         | 0.947205 | 4420.06  |
| ENSGALT0000 | growth hormone receptor             | GHR           | 0.988142 | 727.5    |
| ENSGALT0000 | growth hormone releasing hormone    | GHRH          | 0.749131 | 93.5     |
| ENSGALT0000 | growth-hormone releasing hormone    | GHRH-LR       | 0.469597 | 7        |
| ENSGALT0000 | growth hormone releasing hormone    | GHRHR         | 0.539038 | 0        |
| ENSGALT0000 | ghrelin/obestatin prepropeptide     | GHRL          | 0.990052 | 12.5     |
| ENSGALT0000 | growth hormone secretagogue rec     | GHSR          | 0.84545  | 59.5     |
| ENSGALT0000 | gypsy retrotransposon integrase 1   | GIN1          | 0.98168  | 60       |
| ENSGALT0000 | GINS complex subunit 1 (Psf1 hom    | GINS1         | 0.729607 | 442      |
| ENSGALT0000 | GINS complex subunit 3 (Psf3 hom    | GINS3         | 0.908266 | 642      |
| ENSGALT0000 | gastric inhibitory polypeptide      | GIP           | 0.557652 | 84.5     |
| ENSGALT0000 | GIPC PDZ domain containing famil    | GIPC2         | 0.971663 | 74       |
| ENSGALT0000 | G protein-coupled receptor kinase i | GIT2          | 0.966728 | 2693.46  |
| ENSGALT0000 | gap junction protein, alpha 1, 43kD | GJA1          | 0.980474 | 4363.06  |
| ENSGALT0000 | gap junction protein, alpha 3, 46kD | GJA3          | 0.998299 | 167.5    |
| ENSGALT0000 | connexin 39                         | GJA4          | 0.679921 | 106      |

|                                                  |          |          |         |
|--------------------------------------------------|----------|----------|---------|
| ENSGALT0000 gap junction protein, alpha 5, 40kD  | GJA5     | 0.743877 | 66      |
| ENSGALT0000 gap junction protein, alpha 8, 50kD  | GJA8     | 0.77419  | 2.5     |
| ENSGALT0000 gap junction protein, beta 1, 32kDa  | GJB1     | 0.220881 | 65.4716 |
| ENSGALT0000 gap junction protein, beta 6, 30kDa  | GJB6     | 0.886621 | 6714.02 |
| ENSGALT0000 gap junction protein, gamma 1, 45k   | GJC1     | 0.958242 | 1274.5  |
| ENSGALT0000 gap junction protein, delta 2, 36kDa | GJD2     | 0.585877 | 6       |
| ENSGALT0000 glycerol kinase                      | GK       | 0.914199 | 129.5   |
| ENSGALT0000 glycerol kinase 5 (putative)         | GK5      | 0.995828 | 282.5   |
| ENSGALT0000 G kinase anchoring protein 1         | GKAP1    | 0.954952 | 133.5   |
| ENSGALT0000 gastrokine 1                         | GKN1     | ?        | 0       |
| ENSGALT0000 gastrokine 2                         | GKN2     | 0.464758 | 1       |
| ENSGALT0000 galactosidase, alpha                 | GLA      | 0.88193  | 268     |
| ENSGALT0000 galactosidase, beta 1                | GLB1     | 0.995461 | 1472.51 |
| ENSGALT0000 galactosidase, beta 1-like           | GLB1L    | 0.954763 | 917.5   |
| ENSGALT0000 glucocorticoid induced transcript 1  | GLCCI1   | 0.996705 | 3297.42 |
| ENSGALT0000 glucuronic acid epimerase            | GLCE     | 0.998617 | 1731.5  |
| ENSGALT0000 glycine dehydrogenase (decarboxy     | GLDC     | 0.845404 | 3524.04 |
| ENSGALT0000 gliomedin                            | GLDN     | 0.987205 | 65.5    |
| ENSGALT0000 GLE1 RNA export mediator homolo      | GLE1     | 0.944179 | 798.5   |
| ENSGALT0000 golgi glycoprotein 1                 | GLG1     | 0.968373 | 7961.02 |
| ENSGALT0000 GLI family zinc finger 1             | GLI1     | 0.931606 | 418     |
| ENSGALT0000 GLI family zinc finger 2             | GLI2     | 0.963686 | 934.495 |
| ENSGALT0000 GLI family zinc finger 3             | GLI3     | 0.980931 | 955.007 |
| ENSGALT0000 GLI pathogenesis-related 1-like      | GLIPR1L  | 0.951844 | 993.499 |
| ENSGALT0000 GLI pathogenesis-related 1 like 2    | GLIPR1L2 | 0.783611 | 8       |
| ENSGALT0000 GLI pathogenesis-related 2           | GLIPR2   | 0.771172 | 161.5   |
| ENSGALT0000 GLIS family zinc finger 1            | GLIS1    | 0.945231 | 46.5    |
| ENSGALT0000 GLIS family zinc finger 3            | GLIS3    | 0.933919 | 25      |
| ENSGALT0000 glomulin, FKBP associated protein    | GLMN     | 0.947811 | 294     |
| ENSGALT0000 glyoxalase I                         | GLO1     | 0.955332 | 3931    |
| ENSGALT0000 glyoxalase domain containing 5       | GLOD5    | 0.464758 | 0       |
| ENSGALT0000 glucagon-like peptide 1 receptor     | GLP1R    | 0.871832 | 52      |
| ENSGALT0000 glucagon-like peptide 2 receptor     | GLP2R    | 0.818488 | 1.5     |
| ENSGALT0000 glycine receptor, alpha 1            | GLRA1    | 0.631223 | 0       |
| ENSGALT0000 glycine receptor, alpha 2            | GLRA2    | 0.726187 | 3.5     |
| ENSGALT0000 glycine receptor, alpha 3            | GLRA3    | 0.549852 | 4       |
| ENSGALT0000 glycine receptor, alpha 4            | GLRA4    | 0.577306 | 451.5   |
| ENSGALT0000 glycine receptor, beta               | GLRB     | 0.730897 | 79.5    |
| ENSGALT0000 glutaredoxin                         | GLRX     | 0.507643 | 2       |
| ENSGALT0000 glutaredoxin 2                       | GLRX2    | 0.935178 | 283     |
| ENSGALT0000 glutaredoxin 3                       | GLRX3    | 0.895655 | 2003    |
| ENSGALT0000 glutaredoxin 5                       | GLRX5    | 0.851803 | 1364.12 |
| ENSGALT0000 glutaminase                          | GLS      | 0.907619 | 517.001 |
| ENSGALT0000 glycosyltransferase 1 domain cont    | GLT1D1   | 0.8878   | 677.5   |
| ENSGALT0000 glycosyltransferase 25 domain con    | GLT25D1  | 0.818869 | 337.5   |
| ENSGALT0000 glycosyltransferase 25 domain con    | GLT25D2  | 0.849543 | 839.008 |
| ENSGALT0000 glycosyltransferase 8 domain cont    | GLT8D1   | 0.966402 | 1165.5  |
| ENSGALT0000 glycosyltransferase 8 domain cont    | GLT8D2   | 0.750896 | 47.5    |
| ENSGALT0000 glycolipid transfer protein          | GLTP     | 0.90105  | 431     |
| ENSGALT0000 glycolipid transfer protein domain c | GLTPD1   | 0.743046 | 273     |
| ENSGALT0000 glutamate dehydrogenase 1            | GLUD1    | 0.928553 | 1055    |
| ENSGALT0000 glutamate-ammonia ligase             | GLUL     | 0.941143 | 2666.87 |
| ENSGALT0000 glycerate kinase                     | GLYCTK   | 0.960568 | 396     |
| ENSGALT0000 glyoxylate reductase 1 homolog (A    | GLYR1    | 0.911418 | 2616.57 |
| ENSGALT0000 GM2 ganglioside activator            | GM2A     | 0.877215 | 85.5    |
| ENSGALT0000 GDP-mannose 4,6-dehydratase          | GMDS     | 0.895245 | 1263.5  |

|             |                                     |         |           |         |
|-------------|-------------------------------------|---------|-----------|---------|
| ENSGALT0000 | glucocorticoid modulatory element   | GMEB1   | 0.915469  | 1030.5  |
| ENSGALT0000 | glucocorticoid modulatory element   | GMEB2   | 0.993956  | 222     |
| ENSGALT0000 | glia maturation factor, beta        | GMFB    | 0.833218  | 480.499 |
| ENSGALT0000 | geminin coiled-coil domain containi | GMNC    | 0.733785  | 33.5    |
| ENSGALT0000 | geminin, DNA replication inhibitor  | GMNN    | 0.868223  | 471.5   |
| ENSGALT0000 | GDP-mannose pyrophosphorylase       | GMPPB   | 0.0864407 | 1485.33 |
| ENSGALT0000 | guanosine monophosphate reductase   | GMPR    | 0.918815  | 473.5   |
| ENSGALT0000 | guanine monphosphate synthetase     | GMPS    | 0.915193  | 1557    |
| ENSGALT0000 | \N                                  | GNA11   | 0.976951  | 1382    |
| ENSGALT0000 | guanine nucleotide binding protein  | GNA12   | 0.931307  | 594.5   |
| ENSGALT0000 | guanine nucleotide binding protein  | GNA13   | 0.924383  | 448     |
| ENSGALT0000 | guanine nucleotide binding protein  | GNA14   | 0.590316  | 2.5     |
| ENSGALT0000 | guanine nucleotide binding protein  | GNAI1   | 0.888836  | 1768.49 |
| ENSGALT0000 | guanine nucleotide binding protein  | GNAI2   | 0.919203  | 6496.93 |
| ENSGALT0000 | guanine nucleotide binding protein  | GNAI3   | 0.784712  | 3514.03 |
| ENSGALT0000 | guanine nucleotide binding protein  | GNAL    | 0.968112  | 563.5   |
| ENSGALT0000 | guanine nucleotide binding protein  | GNAO1   | 0.611393  | 502     |
| ENSGALT0000 | guanine nucleotide binding protein  | GNAQ    | 0.987905  | 1077    |
| ENSGALT0000 | GNAS complex locus                  | GNAS    | 0.997371  | 1172    |
| ENSGALT0000 | guanine nucleotide binding protein, | GNAT3   | 0.943934  | 1       |
| ENSGALT0000 | guanine nucleotide binding protein  | GNAZ    | 0.727557  | 136.411 |
| ENSGALT0000 | guanine nucleotide binding protein  | GNB1    | 0.891556  | 14034.7 |
| ENSGALT0000 | guanine nucleotide binding protein  | GNB1L   | 0.919534  | 2564.5  |
| ENSGALT0000 | guanine nucleotide binding protein  | GNB2L1  | 0.821815  | 67897   |
| ENSGALT0000 | guanine nucleotide binding protein  | GNB3    | 0.889474  | 419.5   |
| ENSGALT0000 | guanine nucleotide binding protein  | GNB4    | 0.895736  | 2062.5  |
| ENSGALT0000 | guanine nucleotide binding protein  | GNB5    | 0.930342  | 689.5   |
| ENSGALT0000 | glucosamine (UDP-N-acetyl)-2-epi    | GNE     | 0.970682  | 2073    |
| ENSGALT0000 | guanine nucleotide binding protein  | GNG10   | 0.379456  | 255     |
| ENSGALT0000 | guanine nucleotide binding protein  | GNG11   | 0.875977  | 382     |
| ENSGALT0000 | guanine nucleotide binding protein  | GNG12   | 0.970087  | 234.5   |
| ENSGALT0000 | guanine nucleotide binding protein  | GNG13   | 0.0115974 | 40.5    |
| ENSGALT0000 | guanine nucleotide binding protein  | GNG2    | 0.688823  | 3921    |
| ENSGALT0000 | guanine nucleotide binding protein  | GNG4    | 0.688011  | 24.5    |
| ENSGALT0000 | guanine nucleotide binding protein- | GNL2    | 0.967345  | 1262    |
| ENSGALT0000 | guanine nucleotide binding protein- | GNL3    | 0.939442  | 1787    |
| ENSGALT0000 | glycine N-methyltransferase         | GNMT    | 0.830219  | 2356.5  |
| ENSGALT0000 | Gnot1 homeodomain protein           | GNOT1   | 0.736543  | 58      |
| ENSGALT0000 | glyceronephosphate O-acyltransfer   | GNPAT   | 0.906906  | 1766.49 |
| ENSGALT0000 | glucosamine-6-phosphate deaminase   | GNPDA1  | 0.936459  | 1436    |
| ENSGALT0000 | glucosamine-6-phosphate deaminase   | GNPDA2  | 0.940058  | 885     |
| ENSGALT0000 | glucosamine-phosphate N-acetyltra   | GNPNAT1 | 0.975937  | 606.5   |
| ENSGALT0000 | N-acetylglucosamine-1-phosphate     | GNPTAB  | 0.933021  | 1889    |
| ENSGALT0000 | N-acetylglucosamine-1-phosphate     | GNPTG   | 0.887042  | 470     |
| ENSGALT0000 | gonadotropin-releasing hormone re   | GNRHR   | 0.616042  | 4       |
| ENSGALT0000 | glucosamine (N-acetyl)-6-sulfatase  | GNS     | 0.977719  | 2646.5  |
| ENSGALT0000 | golgin A1                           | GOLGA1  | 0.995919  | 459     |
| ENSGALT0000 | golgi autoantigen, golgin subfamily | GOLGA2  | 0.966998  | 1977.99 |
| ENSGALT0000 | golgin A3                           | GOLGA3  | 0.955805  | 1198.99 |
| ENSGALT0000 | golgin A4                           | GOLGA4  | 0.995176  | 1093.52 |
| ENSGALT0000 | golgin A5                           | GOLGA5  | 0.980783  | 679.5   |
| ENSGALT0000 | golgin A7                           | GOLGA7  | 0.89325   | 3545.5  |
| ENSGALT0000 | golgin B1                           | GOLGB1  | 0.984356  | 2903    |
| ENSGALT0000 | golgi integral membrane protein 4   | GOLIM4  | 0.985598  | 2604.92 |
| ENSGALT0000 | golgi membrane protein 1            | GOLM1   | 0.986906  | 1174    |
| ENSGALT0000 | golgi phosphoprotein 3 (coat-protei | GOLPH3  | 0.96435   | 1351.94 |

|                                                                   |            |          |         |
|-------------------------------------------------------------------|------------|----------|---------|
| ENSGALT0000 golgi phosphoprotein 3-like                           | GOLPH3L    | 0.974862 | 900     |
| ENSGALT0000 golgi transport 1B                                    | GOLT1B     | 0.927288 | 87.5    |
| ENSGALT0000 Progonadoliberin-1 Gonadoliberin-1                    | GON1_CHICK | 0.547885 | 9       |
| ENSGALT0000 gon-4-like (C. elegans)                               | GON4L      | 0.985386 | 1922.5  |
| ENSGALT0000 golgi-associated PDZ and coiled-coiled                | GOPC       | 0.953983 | 839     |
| ENSGALT0000 golgin, RAB6-interacting                              | GORAB      | 0.953754 | 577.499 |
| ENSGALT0000 golgi reassembly stacking protein 1                   | GORASP1    | 0.991124 | 1154    |
| ENSGALT0000 golgi reassembly stacking protein 2                   | GORASP2    | 0.951957 | 2814.56 |
| ENSGALT0000 golgi SNAP receptor complex mem                       | GOSR1      | 0.975714 | 1045.5  |
| ENSGALT0000 golgi SNAP receptor complex mem                       | GOSR2      | 0.969831 | 563.499 |
| ENSGALT0000 glutamic-oxaloacetic transaminase                     | GOT1       | 0.767434 | 2587    |
| ENSGALT0000 glutamic-oxaloacetic transaminase                     | GOT2       | 0.852821 | 10680   |
| ENSGALT0000 glycoprotein Ib (platelet), alpha polypeptide         | GP1BA      | 0.919972 | 31.5    |
| ENSGALT0000 glycoprotein Ib (platelet), beta polypeptide          | GP1BB      | 0.842414 | 27.5    |
| ENSGALT0000 glycoprotein IX (platelet)                            | GP9        | 0.636572 | 0.5     |
| ENSGALT0000 glycoprotein A33 (transmembrane)                      | GPA33      | 0.649519 | 0       |
| ENSGALT0000 glycerol-3-phosphate acyltransferase 1                | GPAM       | 0.895038 | 705.5   |
| ENSGALT0000 glycerol-3-phosphate acyltransferase 2                | GPAT2      | 0.962812 | 859     |
| ENSGALT0000 G patch domain containing 1                           | GPATCH1    | 0.944541 | 563.499 |
| ENSGALT0000 G patch domain containing 2                           | GPATCH2    | 0.961595 | 1084    |
| ENSGALT0000 G patch domain containing 3                           | GPATCH3    | 0.839982 | 255.5   |
| ENSGALT0000 G patch domain containing 8                           | GPATCH8    | 0.957413 | 3237.5  |
| ENSGALT0000 GC-rich promoter binding protein 1                    | GPBP1      | 0.965715 | 611.5   |
| ENSGALT0000 GC-rich promoter binding protein 1-like               | GPBP1L1    | 0.979684 | 1667    |
| ENSGALT0000 glypican 3                                            | GPC3       | 0.856164 | 4490    |
| ENSGALT0000 glypican 4                                            | GPC4       | 0.897267 | 7023.5  |
| ENSGALT0000 glypican 5                                            | GPC5       | 0.97529  | 120     |
| ENSGALT0000 glypican 6                                            | GPC6       | 0.796889 | 167.5   |
| ENSGALT0000 glycerophosphocholine phosphodiesterase               | GPCPD1     | 0.94488  | 844     |
| ENSGALT0000 glycerol-3-phosphate dehydrogenase 1                  | GPD1       | 0.798985 | 47      |
| ENSGALT0000 glycerol-3-phosphate dehydrogenase 1-like             | GPD1L      | 0.894522 | 908     |
| ENSGALT0000 glycerol-3-phosphate dehydrogenase 2                  | GPD2       | 0.971579 | 2043.8  |
| ENSGALT0000 G protein-coupled estrogen receptor                   | GPER       | 0.625644 | 2       |
| ENSGALT0000 gephyrin                                              | GPHN       | 0.924338 | 831.499 |
| ENSGALT0000 glucose-6-phosphate isomerase                         | GPI        | 0.968253 | 6760.96 |
| ENSGALT0000 glycosylphosphatidylinositol specific phospholipase C | GPLD1      | 0.97268  | 5       |
| ENSGALT0000 glycoprotein M6A                                      | GPM6A      | 0.531744 | 457.969 |
| ENSGALT0000 glycoprotein M6B                                      | GPM6B      | 0.855466 | 1728.98 |
| ENSGALT0000 GPN-loop GTPase 3                                     | GPN3       | 0.839099 | 822.5   |
| ENSGALT0000 glycoprotein (transmembrane) nmb                      | GPNMB      | 0.853815 | 0.5     |
| ENSGALT0000 G protein-coupled receptor 107                        | GPR107     | 0.963241 | 1062.5  |
| ENSGALT0000 G protein-coupled receptor 112                        | GPR112     | 0.840509 | 1.5     |
| ENSGALT0000 G protein-coupled receptor 114                        | GPR114     | 0.901516 | 5       |
| ENSGALT0000 G protein-coupled receptor 116                        | GPR116     | 0.720277 | 35      |
| ENSGALT0000 G protein-coupled receptor 119                        | GPR119     | 0.847974 | 4       |
| ENSGALT0000 G protein-coupled receptor 123                        | GPR123     | 0.854921 | 129     |
| ENSGALT0000 G protein-coupled receptor 125                        | GPR125     | 0.939519 | 1804    |
| ENSGALT0000 G protein-coupled receptor 126                        | GPR126     | 0.921757 | 4138    |
| ENSGALT0000 G protein-coupled receptor 128                        | GPR128     | ?        | 0       |
| ENSGALT0000 G protein-coupled receptor 133                        | GPR133     | 0.534977 | 75.3588 |
| ENSGALT0000 G protein-coupled receptor 137C                       | GPR137C    | 0.924433 | 349.499 |
| ENSGALT0000 G protein-coupled receptor 139                        | GPR139     | 0.933741 | 22.5    |
| ENSGALT0000 G protein-coupled receptor 141                        | GPR141     | 0.562993 | 0.5     |
| ENSGALT0000 G protein-coupled receptor 142                        | GPR142     | 0.906302 | 137.5   |
| ENSGALT0000 G protein-coupled receptor 143                        | GPR143     | 0.770193 | 45.5    |
| ENSGALT0000 G protein-coupled receptor 144                        | GPR144     | 0.593777 | 0.5     |

|             |                                      |         |          |         |
|-------------|--------------------------------------|---------|----------|---------|
| ENSGALT0000 | G protein-coupled receptor 146       | GPR146  | 0.927086 | 774.5   |
| ENSGALT0000 | G protein-coupled receptor 148       | GPR148  | ?        | 0       |
| ENSGALT0000 | G protein-coupled receptor 149       | GPR149  | 0.764227 | 40.5    |
| ENSGALT0000 | G protein-coupled receptor 15        | GPR15   | 1        | 0.5     |
| ENSGALT0000 | G protein-coupled receptor 155       | GPR155  | 0.95572  | 509     |
| ENSGALT0000 | G protein-coupled receptor 156       | GPR156  | 0.963095 | 134.5   |
| ENSGALT0000 | G protein-coupled receptor 157       | GPR157  | 0.937538 | 123.5   |
| ENSGALT0000 | G protein-coupled receptor 158       | GPR158  | 0.741901 | 361     |
| ENSGALT0000 | G protein-coupled receptor 160       | GPR160  | 0.919776 | 40      |
| ENSGALT0000 | G protein-coupled receptor 161       | GPR161  | 0.959086 | 793     |
| ENSGALT0000 | G protein-coupled receptor 162       | GPR162  | 0.959069 | 2393.5  |
| ENSGALT0000 | G protein-coupled receptor 17        | GPR17   | 0.605075 | 2       |
| ENSGALT0000 | G protein-coupled receptor 171       | GPR171  | 0.828826 | 0.5     |
| ENSGALT0000 | G protein-coupled receptor 174       | GPR174  | 0.722096 | 0.5     |
| ENSGALT0000 | G protein-coupled receptor 176       | GPR176  | 0.968154 | 197     |
| ENSGALT0000 | G protein-coupled receptor 180       | GPR180  | 0.948696 | 253.5   |
| ENSGALT0000 | G protein-coupled receptor 19        | GPR19   | 0.749343 | 2       |
| ENSGALT0000 | G protein-coupled receptor 22        | GPR22   | 0.498581 | 20.5    |
| ENSGALT0000 | G protein-coupled receptor 26        | GPR26   | 0.149326 | 1.5     |
| ENSGALT0000 | G protein-coupled receptor 27        | GPR27   | 0.901402 | 1700.5  |
| ENSGALT0000 | G protein-coupled receptor 34        | GPR34   | 0.889103 | 13      |
| ENSGALT0000 | G protein-coupled receptor 35        | GPR35   | 0.464758 | 0.5     |
| ENSGALT0000 | G protein-coupled receptor 37 (end   | GPR37   | 0.82534  | 525     |
| ENSGALT0000 | G protein-coupled receptor 37 like   | GPR37L1 | 0.742433 | 423     |
| ENSGALT0000 | G protein-coupled receptor 39        | GPR39   | 0.759941 | 114.185 |
| ENSGALT0000 | G protein-coupled receptor 55        | GPR55   | 0.464758 | 0       |
| ENSGALT0000 | G protein-coupled receptor 56        | GPR56   | 0.996034 | 2011.48 |
| ENSGALT0000 | G protein-coupled receptor 61        | GPR61   | 0.609738 | 29      |
| ENSGALT0000 | G protein-coupled receptor 63        | GPR63   | 0.991844 | 114.5   |
| ENSGALT0000 | G protein-coupled receptor 64        | GPR64   | 0.787496 | 211     |
| ENSGALT0000 | G protein-coupled receptor 65        | GPR65   | 0.790237 | 2       |
| ENSGALT0000 | G protein-coupled receptor 68        | GPR68   | 0.382871 | 1       |
| ENSGALT0000 | G protein-coupled receptor 75        | GPR75   | 0.890197 | 367     |
| ENSGALT0000 | G protein-coupled receptor 78        | GPR78   | 0.601978 | 0.5     |
| ENSGALT0000 | G protein-coupled receptor 83        | GPR83   | 0.942117 | 8       |
| ENSGALT0000 | uncharacterized LOC428696            | GPR83-L | 0.989343 | 23      |
| ENSGALT0000 | G protein-coupled receptor 85        | GPR85   | 0.893776 | 143.5   |
| ENSGALT0000 | G protein-coupled receptor 87        | GPR87   | 0.978182 | 2.5     |
| ENSGALT0000 | G protein-coupled receptor 88        | GPR88   | 0.971817 | 65      |
| ENSGALT0000 | G protein-coupled receptor 89B       | GPR89B  | 0.9571   | 712.218 |
| ENSGALT0000 | G protein-coupled receptor 97        | GPR97   | 0.818488 | 0.5     |
| ENSGALT0000 | G protein-coupled receptor 98        | GPR98   | 0.66548  | 232.5   |
| ENSGALT0000 | G protein-coupled receptor, family ( | GPRC5A  | 0.768165 | 3.5     |
| ENSGALT0000 | G protein-coupled receptor, family ( | GPRC5B  | 0.926845 | 377.5   |
| ENSGALT0000 | G protein-coupled receptor, family ( | GPRC5C  | 0.988359 | 1185.95 |
| ENSGALT0000 | G protein-coupled receptor, family ( | GPRC6A  | ?        | 0       |
| ENSGALT0000 | G protein regulated inducer of neur  | GPRIN2  | 0.992495 | 258.5   |
| ENSGALT0000 | G protein pathway suppressor 1       | GPS1    | 0.930535 | 2535.99 |
| ENSGALT0000 | G-protein signaling modulator 1      | GPSM1   | 0.812522 | 208     |
| ENSGALT0000 | G-protein signaling modulator 2      | GPSM2   | 0.999066 | 4699.52 |
| ENSGALT0000 | glutamic pyruvate transaminase (al   | GPT2    | 0.891318 | 952.5   |
| ENSGALT0000 | glutathione peroxidase 4 (phosphol   | GPX4    | 0.464562 | 2054    |
| ENSGALT0000 | glutathione peroxidase 7             | GPX7    | 0.997276 | 429.5   |
| ENSGALT0000 | glutathione peroxidase 8 (putative)  | GPX8    | 0.93836  | 319.5   |
| ENSGALT0000 | GRAM domain containing 1B            | GRAMD1B | 0.883417 | 271     |
| ENSGALT0000 | GRAM domain containing 1C            | GRAMD1C | 0.985778 | 1152.5  |



|                                                   |         |           |         |
|---------------------------------------------------|---------|-----------|---------|
| ENSGALT0000 GRAM domain containing 2              | GRAMD2  | 0.927088  | 399.5   |
| ENSGALT0000 GRAM domain containing 3              | GRAMD3  | 0.992105  | 569.5   |
| ENSGALT0000 GRAM domain containing 4              | GRAMD4  | 0.958471  | 762     |
| ENSGALT0000 GRB2-related adaptor protein          | GRAP    | 0.366818  | 7.5     |
| ENSGALT0000 GRB2-related adaptor protein 2        | GRAP2   | 0.70962   | 16      |
| ENSGALT0000 growth factor receptor-bound protei   | GRB10   | 0.935532  | 572.499 |
| ENSGALT0000 growth factor receptor-bound protei   | GRB14   | 0.808642  | 5.5     |
| ENSGALT0000 growth factor receptor-bound protei   | GRB2    | 0.926757  | 2304    |
| ENSGALT0000 growth regulation by estrogen in br   | GREB1   | 0.735692  | 157     |
| ENSGALT0000 growth regulation by estrogen in br   | GREB1L  | 0.955159  | 1651.5  |
| ENSGALT0000 gremlin 1                             | GREM1   | 0.776616  | 1       |
| ENSGALT0000 gremlin 2                             | GREM2   | 0.82062   | 12      |
| ENSGALT0000 grainyhead-like 1 (Drosophila)        | GRHL1   | 0.982557  | 197.5   |
| ENSGALT0000 grainyhead-like 2 (Drosophila)        | GRHL2   | 0.993015  | 887.002 |
| ENSGALT0000 grainyhead-like 3 (Drosophila)        | GRHL3   | 0.999206  | 440     |
| ENSGALT0000 glyoxylate reductase/hydroxypyruv:    | GRHPR   | 0.528189  | 426     |
| ENSGALT0000 glutamate receptor, ionotropic, AMF   | GRIA1   | 0.744804  | 126     |
| ENSGALT0000 glutamate receptor, ionotropic, AMF   | GRIA2   | 0.730022  | 176.937 |
| ENSGALT0000 glutamate receptor, ionotropic, AM    | GRIA3   | 0.759801  | 108.215 |
| ENSGALT0000 glutamate receptor, ionotropic, AM    | GRIA4   | 0.850728  | 92.8481 |
| ENSGALT0000 glutamate receptor, ionotropic, delt: | GRID1   | 0.748999  | 78.5    |
| ENSGALT0000 glutamate receptor, ionotropic, delt: | GRID2   | 0.915152  | 259     |
| ENSGALT0000 glutamate receptor, ionotropic, delt: | GRID2IP | 0.770991  | 93.0001 |
| ENSGALT0000 galectin-related inter-fiber protein  | GRIFIN  | ?         | 0       |
| ENSGALT0000 glutamate receptor, ionotropic, kain  | GRIK1   | 0.953468  | 861.391 |
| ENSGALT0000 glutamate receptor, ionotropic, kain  | GRIK2   | 0.742092  | 215.609 |
| ENSGALT0000 glutamate receptor, ionotropic, kain  | GRIK3   | 0.409622  | 4.5     |
| ENSGALT0000 glutamate receptor, ionotropic, kain  | GRIK4   | 0.970694  | 1420.5  |
| ENSGALT0000 glutamate receptor, ionotropic, N-m   | GRIN1   | 0.637854  | 147     |
| ENSGALT0000 glutamate receptor, ionotropic, N-m   | GRIN2A  | 0.812802  | 27.5    |
| ENSGALT0000 glutamate receptor, ionotropic, N-m   | GRIN2B  | 0.770847  | 211.5   |
| ENSGALT0000 glutamate receptor, ionotropic, N-m   | GRIN3A  | 0.895966  | 855.503 |
| ENSGALT0000 glutamate receptor interacting prote  | GRIP1   | 0.974112  | 1149.5  |
| ENSGALT0000 glutamate receptor interacting prote  | GRIP2   | 0.96297   | 385     |
| ENSGALT0000 G protein-coupled receptor kinase     | GRK4    | 0.986372  | 395.5   |
| ENSGALT0000 G protein-coupled receptor kinase     | GRK5    | 0.761823  | 74.5    |
| ENSGALT0000 G protein-coupled receptor kinase     | GRK6    | 0.942576  | 443     |
| ENSGALT0000 G protein-coupled receptor kinase     | GRK7    | 0.974715  | 45.5    |
| ENSGALT0000 glutamate receptor, metabotropic 1    | GRM1    | 0.771597  | 50.5    |
| ENSGALT0000 glutamate receptor, metabotropic 3    | GRM3    | 0.725616  | 157     |
| ENSGALT0000 glutamate receptor, metabotropic 4    | GRM4    | 0.826739  | 1122.5  |
| ENSGALT0000 glutamate receptor, metabotropic 5    | GRM5    | 0.830585  | 6.5     |
| ENSGALT0000 glutamate receptor, metabotropic 7    | GRM7    | 0.86517   | 445     |
| ENSGALT0000 glutamate receptor, metabotropic 8    | GRM8    | 0.79555   | 45      |
| ENSGALT0000 Gastrin-releasing peptideNeuromex     | GRP     | 0.464758  | 0       |
| ENSGALT0000 GrpE-like 1, mitochondrial (E. coli)  | GRPEL1  | 0.78645   | 1296.5  |
| ENSGALT0000 GrpE-like 2, mitochondrial (E. coli)  | GRPEL2  | 0.888688  | 951.5   |
| ENSGALT0000 gastrin-releasing peptide receptor    | GRPR    | 0.547794  | 5       |
| ENSGALT0000 G-rich RNA sequence binding factc     | GRSF1   | 0.910939  | 2195.5  |
| ENSGALT0000 growth hormone regulated TBC prc      | GRTF1   | 0.964035  | 136.5   |
| ENSGALT0000 glutaredoxin, cysteine rich 1         | GRXCR1  | 0.203007  | 12.5    |
| ENSGALT0000 glutaredoxin, cysteine rich 2         | GRXCR2  | 0.0297313 | 4.5     |
| ENSGALT0000 goosecoid homeobox                    | GSC     | 0.72199   | 75      |
| ENSGALT0000 goosecoid homeobox 2                  | GSC2    | 0.429924  | 55.5    |
| ENSGALT0000 gasdermin 1                           | GSDMA   | 0.918082  | 199     |
| ENSGALT0000 germ cell associated 1                | GSG1    | 0.683403  | 1       |

|                                                       |          |          |         |
|-------------------------------------------------------|----------|----------|---------|
| ENSGALT0000 germ cell-specific gene 1-like prote      | GSG1L    | 0.923308 | 12      |
| ENSGALT0000 glycogen synthase kinase 3 beta           | GSK3B    | 0.934822 | 2515.5  |
| ENSGALT0000 gelsolin                                  | GSN      | 0.884091 | 5024.14 |
| ENSGALT0000 G1 to S phase transition 1                | GSPT1    | 0.865826 | 1716.49 |
| ENSGALT0000 glutathione reductase                     | GSR      | 0.770931 | 1136    |
| ENSGALT0000 glutathione synthetase                    | GSS      | 0.775031 | 1628    |
| ENSGALT0000 glutathione S-transferase class- $\alpha$ | GSTA     | 0.710254 | 632.211 |
| ENSGALT0000 glutathione S-transferase alpha 3         | GSTA3    | 0.673152 | 226.869 |
| ENSGALT0000 glutathione S-transferase, C-termin       | GSTCD    | 0.986    | 557.996 |
| ENSGALT0000 glutathione S-transferase kappa 1         | GSTK1    | 0.8572   | 689     |
| ENSGALT0000 glutathione S-transferase omega 1         | GSTO1    | 0.802846 | 1125    |
| ENSGALT0000 glutathione S-transferase theta 1         | GSTT1    | 0.82912  | 77      |
| ENSGALT0000 glutathione transferase zeta 1            | GSTZ1    | 0.8235   | 420.5   |
| ENSGALT0000 glycosyltransferase-like domain cor       | GTDC1    | 0.952697 | 456.001 |
| ENSGALT0000 general transcription factor IIA, 1, 1    | GTF2A1   | 0.973154 | 1952.49 |
| ENSGALT0000 general transcription factor IIA, 2, 1    | GTF2A2   | 0.874907 | 847.5   |
| ENSGALT0000 general transcription factor IIB          | GTF2B    | 0.783762 | 1024    |
| ENSGALT0000 general transcription factor IIE, poly    | GTF2E1   | 0.94052  | 1004    |
| ENSGALT0000 general transcription factor IIE, poly    | GTF2E2   | 0.937923 | 1074.5  |
| ENSGALT0000 general transcription factor IIF, poly    | GTF2F2   | 0.898907 | 990.5   |
| ENSGALT0000 general transcription factor IIH, poly    | GTF2H1   | 0.965794 | 702.5   |
| ENSGALT0000 general transcription factor IIH, poly    | GTF2H3   | 0.90017  | 864     |
| ENSGALT0000 general transcription factor IIH, poly    | GTF2H4   | 0.993782 | 15785.5 |
| ENSGALT0000 General transcription factor IIH sub      | GTF2H5   | 0.993318 | 1526.5  |
| ENSGALT0000 general transcription factor Ili          | GTF2I    | 0.953156 | 912.5   |
| ENSGALT0000 GTF2I repeat domain containing 1          | GTF2IRD1 | 0.99246  | 5189    |
| ENSGALT0000 general transcription factor IIIA         | GTF3A    | 0.938234 | 675.5   |
| ENSGALT0000 general transcription factor IIIC, pol    | GTF3C1   | 0.962424 | 2705.93 |
| ENSGALT0000 general transcription factor IIIC, pol    | GTF3C3   | 0.953237 | 817.494 |
| ENSGALT0000 general transcription factor IIIC, pol    | GTF3C5   | 0.97371  | 963.004 |
| ENSGALT0000 general transcription factor IIIC, pol    | GTF3C6   | 0.536286 | 1058.5  |
| ENSGALT0000 GTP binding protein 1                     | GTPBP1   | 0.928587 | 5391.29 |
| ENSGALT0000 GTP-binding protein 10 (putative)         | GTPBP10  | 0.909902 | 754.5   |
| ENSGALT0000 GTP binding protein 2                     | GTPBP2   | 0.950286 | 761     |
| ENSGALT0000 GTP binding protein 4                     | GTPBP4   | 0.846144 | 2477    |
| ENSGALT0000 GTP binding protein 5 (putative)          | GTPBP5   | 0.888238 | 319     |
| ENSGALT0000 GTP binding protein 6 (putative)          | GTPBP6   | 0.957136 | 184     |
| ENSGALT0000 GTP-binding protein 8 (putative)          | GTPBP8   | 0.870396 | 405.5   |
| ENSGALT0000 G-2 and S-phase expressed 1               | GTSE1    | 0.935138 | 382.239 |
| ENSGALT0000 gametocyte specific factor 1              | GTSF1    | 0.428055 | 61      |
| ENSGALT0000 guanylate cyclase activator 1A (reti      | GUCA1A   | 0.94691  | 2       |
| ENSGALT0000 guanylate cyclase activator 1B (reti      | GUCA1B   | 0        | 0       |
| ENSGALT0000 guanylate cyclase activator 1C            | GUCA1C   | 0.828826 | 0.5     |
| ENSGALT0000 guanylate cyclase 1, soluble, alpha       | GUCY1A2  | 0.873703 | 42.5    |
| ENSGALT0000 guanylate cyclase 1, soluble, alpha       | GUCY1A3  | 0.943828 | 584     |
| ENSGALT0000 guanylate cyclase 1, soluble, beta        | GUCY1B2  | 0.885912 | 131.5   |
| ENSGALT0000 guanylate cyclase 1, soluble, beta        | GUCY1B3  | 0.960301 | 789     |
| ENSGALT0000 guanylate cyclase 2C (heat stable         | GUCY2C   | 0.874365 | 4.5     |
| ENSGALT0000 guanylate cyclase 2F, retinal             | GUCY2F   | 0.946028 | 5       |
| ENSGALT0000 GUF1 GTPase homolog (S. cerevis           | GUF1     | 0.946299 | 273     |
| ENSGALT0000 guanylate kinase 1                        | GUK1     | 0.706365 | 486.095 |
| ENSGALT0000 GULP, engulfment adaptor PTB do           | GULP1    | 0.989985 | 340     |
| ENSGALT0000 glucuronidase, beta                       | GUSB     | 0.932703 | 1300.5  |
| ENSGALT0000 glucoside xylosyltransferase 1            | GXYLT1   | 0.995841 | 1272.5  |
| ENSGALT0000 glucoside xylosyltransferase 2            | GXYLT2   | 0.94711  | 707.5   |
| ENSGALT0000 glycogenin 1                              | GYG1     | 0.907951 | 1309.5  |

|                                                   |            |            |         |
|---------------------------------------------------|------------|------------|---------|
| ENSGALT0000 glycogenin 2                          | GYG2       | 0.92409    | 101.5   |
| ENSGALT0000 glycosyltransferase-like 1B           | GYLTL1B    | 0.992163   | 3480.09 |
| ENSGALT0000 glycophorin C                         | GYPC       | 0.717898   | 59.5    |
| ENSGALT0000 glycogen synthase 2 (liver)           | GYS2       | 0.738693   | 11      |
| ENSGALT0000 GDNF-inducible zinc finger protein    | GZF1       | 0.964462   | 454.499 |
| ENSGALT0000 granzyme A (granzyme 1, cytotoxic     | GZMA       | 0.464758   | 0       |
| ENSGALT0000 granzyme K (granzyme 3; tryptase      | GZMK       | 0.150565   | 2.5     |
| ENSGALT0000 H1 histone family, member O           | H1FO       | 0.590867   | 43.5    |
| ENSGALT0000 H1 histone family, member O, oocy     | H1FOO      | 0.19245    | 4       |
| ENSGALT0000 Histone H2A-IV                        | H2A4_CHICK | 0.573794   | 594.883 |
| ENSGALT0000 H2A histone family, member Y          | H2AFY      | 0.814547   | 1436.99 |
| ENSGALT0000 H2A histone family, member Y2         | H2AFY2     | 0.974279   | 4335    |
| ENSGALT0000 Histone H2A                           | H2A-IX     | 0.0450891  | 113.017 |
| ENSGALT0000 Histone H2A.Z                         | H2AZ_CHICK | 0.479687   | 6446.83 |
| ENSGALT0000 histone cluster 1, H2bn               | H2B-V      | 0.640577   | 20.8805 |
| ENSGALT0000 Histone H2B 1/2/3/4/6                 | H2B-VII    | 0.170101   | 231.712 |
| ENSGALT0000 H3 histone, family 3C                 | H3F3C      | 0.740647   | 35596   |
| ENSGALT0000 H3 histone, family 3A                 | H3-VIII    | 0.473513   | 562.96  |
| ENSGALT0000 germinal histone H4 gene              | H4         | 0.00248832 | 571.009 |
| ENSGALT0000 histone H4-VII                        | H4-VII     | 0.417863   | 446.278 |
| ENSGALT0000 hexose-6-phosphate dehydrogenase      | H6PD       | 0.99964    | 540.001 |
| ENSGALT0000 3-hydroxyanthranilate 3,4-dioxygen    | HAAO       | 0.927729   | 1       |
| ENSGALT0000 hyaluronan binding protein 2          | HABP2      | 0.829421   | 5.5     |
| ENSGALT0000 hyaluronan binding protein 4          | HABP4      | 0.932132   | 306.5   |
| ENSGALT0000 HECT domain and ankyrin repeat c      | HACE1      | 0.984908   | 920.503 |
| ENSGALT0000 2-hydroxyacyl-CoA lyase 1             | HACL1      | 0.954004   | 340     |
| ENSGALT0000 hydroxyacyl-CoA dehydrogenase         | HADH       | 0.879973   | 1669.5  |
| ENSGALT0000 hydroxyacyl-CoA dehydrogenase/3       | HADHA      | 0.89441    | 4981.5  |
| ENSGALT0000 hydroxyacyl-CoA dehydrogenase/3       | HADHB      | 0.913918   | 3191    |
| ENSGALT0000 hydroxyacylglutathione hydrolase      | HAGH       | 0.837175   | 324.5   |
| ENSGALT0000 hydroxyacylglutathione hydrolase-li   | HAGHL      | 0.941952   | 1558    |
| ENSGALT0000 histidine ammonia-lyase               | HAL        | 0.988002   | 18      |
| ENSGALT0000 heart and neural crest derivatives e  | HAND2      | 0.670211   | 5       |
| ENSGALT0000 hydroxyacid oxidase (glycolate oxid   | HAO1       | 0.909127   | 12      |
| ENSGALT0000 hydroxyacid oxidase 2 (long chain)    | HAO2       | 0.496138   | 7.5     |
| ENSGALT0000 hyaluronan and proteoglycan link p    | HAPLN1     | 0.930203   | 279.5   |
| ENSGALT0000 hyaluronan and proteoglycan link p    | HAPLN2     | 0.878124   | 25.5    |
| ENSGALT0000 hyaluronan and proteoglycan link p    | HAPLN3     | 0.9007     | 221.5   |
| ENSGALT0000 Human accelerated region 1F           | HAR1F      | ?          | 0       |
| ENSGALT0000 harbinger transposase derived 1       | HARBI1     | 0.919065   | 317     |
| ENSGALT0000 histidyl-tRNA synthetase              | HARS       | 0.696037   | 3563.17 |
| ENSGALT0000 histidyl-tRNA synthetase 2, mitoch    | HARS2      | 0.841077   | 470.384 |
| ENSGALT0000 hyaluronan synthase 2                 | HAS2       | 0.9083     | 395.999 |
| ENSGALT0000 hyaluronan synthase 3                 | HAS3       | 0.996158   | 49      |
| ENSGALT0000 histone acetyltransferase 1           | HAT1       | 0.944359   | 1072    |
| ENSGALT0000 HAUS augmin-like complex, subun       | HAUS1      | 0.807853   | 267.5   |
| ENSGALT0000 HAUS augmin-like complex, subun       | HAUS2      | 0.931377   | 673     |
| ENSGALT0000 HAUS augmin-like complex, subun       | HAUS3      | 0.957573   | 270     |
| ENSGALT0000 HAUS augmin-like complex, subun       | HAUS6      | 0.939802   | 1150.48 |
| ENSGALT0000 HAUS augmin-like complex, subun       | HAUS8      | 0.964306   | 356.5   |
| ENSGALT0000 hepatitis A virus cellular receptor 1 | HAVCR1     | 0.700513   | 19      |
| ENSGALT0000 hemoglobin, alpha 1                   | HBAA       | 0.174547   | 4795.5  |
| ENSGALT0000 hemoglobin, beta                      | HBE        | 0.445228   | 1954.19 |
| ENSGALT0000 hemoglobin, epsilon 1                 | HBE1       | 0.376157   | 962.035 |
| ENSGALT0000 heparin-binding EGF-like growth fa    | HBEGF      | 0.358516   | 16.5    |
| ENSGALT0000 hemoglobin, gamma A                   | HBG1       | 0.446759   | 8182.14 |

|                                                    |          |          |         |
|----------------------------------------------------|----------|----------|---------|
| ENSGALT0000 hemoglobin, mu                         | HBM      | 0.248439 | 3771.04 |
| ENSGALT0000 HMG-box transcription factor 1         | HBP1     | 0.976676 | 840     |
| ENSGALT0000 HBS1-like ( <i>S. cerevisiae</i> )     | HBS1L    | 0.943563 | 1189    |
| ENSGALT0000 hepatitis B virus x interacting protei | HBXIP    | 0.334909 | 1161.5  |
| ENSGALT0000 hemoglobin, zeta                       | HBZ      | 0.423968 | 2177.53 |
| ENSGALT0000 holocytochrome c synthase              | HCCS     | 0.953505 | 1019.5  |
| ENSGALT0000 host cell factor C2                    | HCFC2    | 0.991359 | 492.5   |
| ENSGALT0000 hemopoietic cell kinase                | HCK      | 0.185958 | 17      |
| ENSGALT0000 hematopoietic cell-specific Lyn sub    | HCLS1    | 0.762897 | 36.5    |
| ENSGALT0000 hyperpolarization activated cyclic n   | HCN1     | 0.671032 | 21.5    |
| ENSGALT0000 hyperpolarization activated cyclic n   | HCN2     | 0.931508 | 3269.5  |
| ENSGALT0000 hyperpolarization activated cyclic n   | HCN4     | 0.889451 | 136.5   |
| ENSGALT0000 hypocretin (orexin) neuropeptide       | HCRT     | 0.539158 | 7       |
| ENSGALT0000 hypocretin (orexin) receptor 2         | HCRT2    | 0.56815  | 1       |
| ENSGALT0000 histone deacetylase 1                  | HDAC1    | 0.989526 | 2726.5  |
| ENSGALT0000 histone deacetylase 11                 | HDAC11   | 0.994003 | 351.5   |
| ENSGALT0000 histone deacetylase 2                  | HDAC2    | 0.886543 | 10252   |
| ENSGALT0000 histone deacetylase 3                  | HDAC3    | 0.934674 | 2102.04 |
| ENSGALT0000 histone deacetylase 4                  | HDAC4    | 0.995745 | 1577.96 |
| ENSGALT0000 histone deacetylase 7                  | HDAC7    | 0.92252  | 2028    |
| ENSGALT0000 histone deacetylase 8                  | HDAC8    | 0.883919 | 2777.5  |
| ENSGALT0000 histone deacetylase 9                  | HDAC9    | 0.992932 | 495.498 |
| ENSGALT0000 histidine decarboxylase                | HDC      | 0.649519 | 4       |
| ENSGALT0000 HD domain containing 2                 | HDDC2    | 0.450341 | 1059    |
| ENSGALT0000 haloacid dehalogenase-like hydrolyse   | HDHD1    | 0.889855 | 234     |
| ENSGALT0000 haloacid dehalogenase-like hydrolyse   | HDHD2    | 0.827883 | 516     |
| ENSGALT0000 haloacid dehalogenase-like hydrolyse   | HDHD3    | 0.638911 | 1840    |
| ENSGALT0000 high density lipoprotein binding pro   | HDLBP    | 0.961034 | 36886   |
| ENSGALT0000 highly divergent homeobox              | HDX      | 0.98255  | 475.5   |
| ENSGALT0000 HEAT repeat containing 1               | HEATR1   | 0.955828 | 2063.15 |
| ENSGALT0000 HEAT repeat containing 2               | HEATR2   | 0.929389 | 488.5   |
| ENSGALT0000 HEAT repeat containing 3               | HEATR3   | 0.933211 | 745.126 |
| ENSGALT0000 HEAT repeat containing 5A              | HEATR5A  | 0.979119 | 1482.5  |
| ENSGALT0000 HEAT repeat containing 5B              | HEATR5B  | 0.96355  | 1858.5  |
| ENSGALT0000 HEAT repeat containing 6               | HEATR6   | 0.952875 | 1252    |
| ENSGALT0000 heme binding protein 1                 | HEBP1    | 0.992064 | 1297    |
| ENSGALT0000 heme binding protein 2                 | HEBP2    | 0.656469 | 8       |
| ENSGALT0000 headcase homolog ( <i>Drosophila</i> ) | HECA     | 0.972373 | 848     |
| ENSGALT0000 HECT domain containing 1               | HECTD1   | 0.965116 | 3946.53 |
| ENSGALT0000 HECT domain containing 2               | HECTD2   | 0.982356 | 177     |
| ENSGALT0000 HECT domain containing 3               | HECTD3   | 0.937703 | 1616    |
| ENSGALT0000 HECT, C2 and WW domain contain         | HECW1    | 0.844342 | 720.5   |
| ENSGALT0000 HECT, C2 and WW domain contain         | HECW2    | 0.989503 | 1309    |
| ENSGALT0000 HEG homolog 1 (zebrafish)              | HEG1     | 0.970578 | 2592.5  |
| ENSGALT0000 helicase (DNA) B                       | HELB     | 0.997899 | 655     |
| ENSGALT0000 helicase, lymphoid-specific            | HELLS    | 0.916398 | 1128.5  |
| ENSGALT0000 helicase, POLQ-like                    | HELQ     | 0.933833 | 306     |
| ENSGALT0000 helicase with zinc finger              | HELZ     | 0.97921  | 1864    |
| ENSGALT0000 hemogen                                | HEMGN    | 0.407108 | 2.5     |
| ENSGALT0000 HemK methyltransferase family me       | HEMK1    | 0.931962 | 276.499 |
| ENSGALT0000 HEN1 methyltransferase homolog         | HENMT1   | 0.968554 | 88.5    |
| ENSGALT0000 Hep21 protein                          | HEP21    | 0.649519 | 0.5     |
| ENSGALT0000 hepatic and glial cell adhesion mol    | HEPACAM  | 0.794065 | 7       |
| ENSGALT0000 HEPACAM family member 2                | HEPACAM2 | 0.553616 | 2.5     |
| ENSGALT0000 hephaestin                             | HEPH     | 0.995926 | 1234.02 |
| ENSGALT0000 hephaestin-like 1                      | HEPHL1   | 0.6535   | 2.5     |

|                                                                     |           |           |         |
|---------------------------------------------------------------------|-----------|-----------|---------|
| ENSGALT0000 hect (homologous to the E6-AP (U1) domain)              | HERC1     | 0.962731  | 7052    |
| ENSGALT0000 hect domain and RLD 2                                   | HERC2     | 0.937461  | 8972.62 |
| ENSGALT0000 hect domain and RLD 3                                   | HERC3     | 0.975973  | 1379.49 |
| ENSGALT0000 hect domain and RLD 4                                   | HERC4     | 0.918576  | 798.503 |
| ENSGALT0000 homocysteine-inducible, endoplasmic reticulum chaperone | HERPUD1   | 0.962592  | 1624.5  |
| ENSGALT0000 HERPUD family member 2                                  | HERPUD2   | 0.916375  | 2677    |
| ENSGALT0000 hairy and enhancer of split 1, (Drosophila)             | HES1      | 0.822642  | 507.497 |
| ENSGALT0000 hairy and enhancer of split 5 (Drosophila)              | HES5      | 0.625382  | 237.675 |
| ENSGALT0000 hairy and enhancer of split 6 (Drosophila)              | HES6      | 0.807303  | 161     |
| ENSGALT0000 hairy and enhancer of split 7 (Drosophila)              | HES7      | 0.880628  | 26.7125 |
| ENSGALT0000 hexosaminidase A (alpha polypeptide)                    | HEXA      | 0.987956  | 4290    |
| ENSGALT0000 hexosaminidase B (beta polypeptide)                     | HEXB      | 0.912484  | 782.5   |
| ENSGALT0000 hexosaminidase (glycosyl hydrolase 6)                   | HEXDC     | 0.988059  | 532     |
| ENSGALT0000 hairy/enhancer-of-split related with HEY1               | HEY1      | 0.856352  | 7924.5  |
| ENSGALT0000 hairy/enhancer-of-split related with HEY2               | HEY2      | 0.52837   | 272.5   |
| ENSGALT0000 hairy/enhancer-of-split related with HEYL               | HEYL      | 0.781234  | 390     |
| ENSGALT0000 homogentisate 1,2-dioxygenase                           | HGD       | 0.89781   | 5.5     |
| ENSGALT0000 hepatocyte growth factor (hepatopoietin)                | HGF       | 0.494516  | 382.501 |
| ENSGALT0000 HGF activator                                           | HGFAC     | 0.353553  | 1       |
| ENSGALT0000 hepatocyte growth factor-regulated tyrosine kinase      | HGS       | 0.831201  | 3400.5  |
| ENSGALT0000 heparan-alpha-glucosaminidase N-acetylglucosaminidase   | HGSNAT    | 0.959756  | 608     |
| ENSGALT0000 hedgehog acyltransferase                                | HHAT      | 0.996363  | 268     |
| ENSGALT0000 hedgehog acyltransferase-like                           | HHATL     | 0.839482  | 525     |
| ENSGALT0000 hematopoietically expressed homeobox protein            | HHEX      | 0.762318  | 47      |
| ENSGALT0000 hedgehog interacting protein                            | HHIP      | 0.521284  | 134     |
| ENSGALT0000 HHIP-like 1                                             | HHIPL1    | 0.940204  | 489     |
| ENSGALT0000 HHIP-like 2                                             | HHIPL2    | 0.83951   | 14      |
| ENSGALT0000 HERV-H LTR-associating 2                                | HHLA2     | 0.865492  | 174.5   |
| ENSGALT0000 hippocampus abundant transcript 1                       | HIAT1     | 0.967018  | 1477.5  |
| ENSGALT0000 3-hydroxyisobutyrate dehydrogenase                      | HIBADH    | 0.94053   | 612     |
| ENSGALT0000 3-hydroxyisobutyryl-CoA hydrolase                       | HIBCH     | 0.870952  | 1528    |
| ENSGALT0000 hypermethylated in cancer 2                             | HIC2      | 0.985353  | 659     |
| ENSGALT0000 hypoxia inducible factor 1, alpha subunit               | HIF1A     | 0.945482  | 8541.09 |
| ENSGALT0000 hypoxia inducible factor 1, alpha subunit               | HIF1AN    | 0.942165  | 639     |
| ENSGALT0000 HIG1 hypoxia inducible domain family class 1A           | HIGD1A    | 0.385284  | 741     |
| ENSGALT0000 HIG1 hypoxia inducible domain family class 2A           | HIGD2A    | 0.0411224 | 2416    |
| ENSGALT0000 histone H4 transcription factor                         | HINFP     | 0.85147   | 477.5   |
| ENSGALT0000 histidine triad nucleotide binding protein 1            | HINT1     | 0.515962  | 3339.54 |
| ENSGALT0000 histidine triad nucleotide binding protein 3            | HINT3     | 0.531028  | 124.5   |
| ENSGALT0000 HINTW                                                   | HINTW     | 0.521533  | 3858.33 |
| ENSGALT0000 huntingtin interacting protein 1                        | HIP1      | 0.723242  | 5942.13 |
| ENSGALT0000 huntingtin interacting protein 1 related                | HIP1R     | 0.948566  | 1709.03 |
| ENSGALT0000 homeodomain interacting protein kinase 1                | HIPK1     | 0.997972  | 4880.5  |
| ENSGALT0000 homeodomain interacting protein kinase 2                | HIPK2     | 0.978173  | 4599.97 |
| ENSGALT0000 homeodomain interacting protein kinase 3                | HIPK3     | 0.96323   | 1522    |
| ENSGALT0000 HIR histone cell cycle regulation domain                | HIRA      | 0.979083  | 2154.97 |
| ENSGALT0000 histone 1, H1c                                          | HIST1H1C  | 0.263619  | 4.81128 |
| ENSGALT0000 histone cluster 1, H2bo                                 | HIST1H2BO | 0.126839  | 123.768 |
| ENSGALT0000 histone cluster 2, H2ac                                 | HIST2H2AC | 0.194418  | 24.1962 |
| ENSGALT0000 human immunodeficiency virus type 1                     | HIVEP1    | 0.99679   | 1967.5  |
| ENSGALT0000 human immunodeficiency virus type 2                     | HIVEP2    | 0.894651  | 748.498 |
| ENSGALT0000 human immunodeficiency virus type 3                     | HIVEP3    | 0.914036  | 237.5   |
| ENSGALT0000 Holliday junction recognition protein                   | HJURP     | 0.919724  | 319.999 |
| ENSGALT0000 hexokinase 1                                            | HK1       | 0.896841  | 7548.58 |
| ENSGALT0000 hexokinase 2                                            | HK2       | 0.992356  | 3767.19 |
| ENSGALT0000 hexokinase 3 (white cell)                               | HK3       | 0.466498  | 20.5    |

|                                                 |           |          |         |
|-------------------------------------------------|-----------|----------|---------|
| ENSGALT0000 hexokinase domain containing 1      | HKDC1     | 0.810055 | 272.5   |
| ENSGALT0000 holocarboxylase synthetase (biotin- | HLCS      | 0.953694 | 413     |
| ENSGALT0000 hepatic leukemia factor             | HLF       | 0.992297 | 232     |
| ENSGALT0000 histocompatibility (minor) 13       | HM13      | 0.921593 | 5698    |
| ENSGALT0000 homeobox containing 1               | HMBOX1    | 0.997338 | 913     |
| ENSGALT0000 hydroxymethylbilane synthase        | HMBS      | 0.858884 | 1705    |
| ENSGALT0000 hemicentin 1                        | HMCN1     | 0.996589 | 6041.5  |
| ENSGALT0000 high-mobility group 20A             | HMG20A    | 0.92799  | 2043.5  |
| ENSGALT0000 high mobility group AT-hook 2       | HMGA2     | 0.9931   | 49.5    |
| ENSGALT0000 high mobility group box 1           | HMGB1     | 0.89435  | 8092.19 |
| ENSGALT0000 high mobility group box 2           | HMGB2     | 0.822067 | 4702.5  |
| ENSGALT0000 high mobility group box 3           | HMGB3     | 0.717014 | 1903    |
| ENSGALT0000 3-hydroxymethyl-3-methylglutaryl-C  | HMGCL     | 0.730459 | 1129.49 |
| ENSGALT0000 3-hydroxymethyl-3-methylglutaryl-C  | HMGCLL1   | 0.660213 | 260.5   |
| ENSGALT0000 3-hydroxy-3-methylglutaryl-CoA rec  | HMGCR     | 0.828646 | 2011.03 |
| ENSGALT0000 3-hydroxy-3-methylglutaryl-CoA sy   | HMGCS1    | 0.657954 | 1314.99 |
| ENSGALT0000 3-hydroxy-3-methylglutaryl-CoA sy   | HMGCS2    | 0.819553 | 4.5     |
| ENSGALT0000 high mobility group nucleosome bir  | HMGN1     | 0.910247 | 1959    |
| ENSGALT0000 high mobility group nucleosomal bi  | HMGN2     | 0.936742 | 14658.5 |
| ENSGALT0000 high mobility group nucleosomal bi  | HMGN3     | 0.947739 | 2073.5  |
| ENSGALT0000 high mobility group nucleosome bir  | HMGN5     | 0.684652 | 3664.5  |
| ENSGALT0000 HMG box domain containing 3         | HMGXB3    | 0.969693 | 1107.5  |
| ENSGALT0000 HMG box domain containing 4         | HMGXB4    | 0.96604  | 799.5   |
| ENSGALT0000 histocompatibility (minor) HA-1     | HMHA1     | 0.963321 | 105     |
| ENSGALT0000 hyaluronan-mediated motility recep  | HMMR      | 0.954282 | 506.5   |
| ENSGALT0000 heme oxygenase (decycling) 1        | HMOX1     | 0.522942 | 273     |
| ENSGALT0000 heme oxygenase (decycling) 2        | HMOX2     | 0.844738 | 1855.5  |
| ENSGALT0000 H6 family homeobox 1                | HMX1      | 0.620735 | 60.9955 |
| ENSGALT0000 H6 family homeobox 3                | HMX3      | 0.495766 | 529.218 |
| ENSGALT0000 hematological and neurological exp  | HN1       | 0.677539 | 5595    |
| ENSGALT0000 hematological and neurological exp  | HN1L      | 0.957353 | 2426.54 |
| ENSGALT0000 HNF1 homeobox A                     | HNF1A     | 0.991821 | 44      |
| ENSGALT0000 hepatocyte nuclear factor 4, alpha  | HNF4A     | 0.886894 | 4.5     |
| ENSGALT0000 hepatic nuclear factor 4beta        | HNF4beta  | 0.790199 | 5       |
| ENSGALT0000 hepatocyte nuclear factor 4, gamm   | HNF4G     | 0.65697  | 2       |
| ENSGALT0000 histamine N-methyltransferase       | HNMT      | 0.785001 | 13.5    |
| ENSGALT0000 heterogeneous nuclear ribonucleoç   | HNRNPA0   | 0.817583 | 5904.5  |
| ENSGALT0000 heterogeneous nuclear ribonucleoç   | HNRNPA2B1 | 0.775557 | 17616   |
| ENSGALT0000 heterogeneous nuclear ribonucleoç   | HNRNPA3   | 0.803949 | 17389.4 |
| ENSGALT0000 heterogeneous nuclear ribonucleoç   | HNRNPAB   | 0.895617 | 6865.54 |
| ENSGALT0000 heterogeneous nuclear ribonucleoç   | HNRNPD    | 0.793877 | 2447    |
| ENSGALT0000 heterogeneous nuclear ribonucleoç   | HNRNPH1   | 0.724917 | 27774.4 |
| ENSGALT0000 heterogeneous nuclear ribonucleoç   | HNRNPH3   | 0.655896 | 13497.8 |
| ENSGALT0000 heterogeneous nuclear ribonucleoç   | HNRNPK    | 0.923881 | 8768.43 |
| ENSGALT0000 heterogeneous nuclear ribonucleoç   | HNRNPM    | 0.883805 | 9186.17 |
| ENSGALT0000 heterogeneous nuclear ribonucleoç   | HNRNPR    | 0.915372 | 8266.1  |
| ENSGALT0000 heterogeneous nuclear ribonucleoç   | HNRNPU    | 0.94593  | 9081.86 |
| ENSGALT0000 heterogeneous nuclear ribonucleoç   | HNRPDL    | 0.840492 | 8522.01 |
| ENSGALT0000 hypothetical protein LOC426516      | HNRPK     | 0.969174 | 2314.07 |
| ENSGALT0000 heterogeneous nuclear ribonucleoç   | HNRPLL    | 0.932191 | 2179.5  |
| ENSGALT0000 4-hydroxy-2-oxoglutarate aldolase   | HOGA1     | 0.781934 | 6.5     |
| ENSGALT0000 homer homolog 1 (Drosophila)        | HOMER1    | 0.954456 | 136.5   |
| ENSGALT0000 homer homolog 2 (Drosophila)        | HOMER2    | 0.942507 | 463     |
| ENSGALT0000 homer homolog 3 (Drosophila)        | HOMER3    | 0.943953 | 711.5   |
| ENSGALT0000 hook homolog 1 (Drosophila)         | HOOK1     | 0.996193 | 456     |
| ENSGALT0000 hook homolog 3 (Drosophila)         | HOOK3     | 0.887781 | 278     |

|                                                                |         |           |         |
|----------------------------------------------------------------|---------|-----------|---------|
| ENSGALT0000 HOP homeobox                                       | HOPX    | 0.751341  | 73.0001 |
| ENSGALT0000 HORMA domain containing 1                          | HORMAD1 | 0.985576  | 144     |
| ENSGALT0000 HORMA domain containing 2                          | HORMAD2 | 0.89355   | 2.5     |
| ENSGALT0000 homeobox A11                                       | HOXA11  | 0.464758  | 0       |
| ENSGALT0000 homeobox A13                                       | HOXA13  | ?         | 0       |
| ENSGALT0000 homeobox A3                                        | HOXA3   | 0.697633  | 3.5     |
| ENSGALT0000 homeobox A4                                        | HOXA4   | 0.649519  | 0.5     |
| ENSGALT0000 homeobox A7                                        | HOXA7   | 0.464758  | 0.5     |
| ENSGALT0000 homeobox A9                                        | HOXA9   | ?         | 0       |
| ENSGALT0000 homeobox B13                                       | HOXB13  | ?         | 0       |
| ENSGALT0000 homeobox B3                                        | HOXB3   | 0.574695  | 1.5     |
| ENSGALT0000 Homeobox protein Hox-B4                            | HOXB4   | 0.649519  | 0.5     |
| ENSGALT0000 Homeobox protein Hox-B5                            | HOXB5   | 0.464758  | 0       |
| ENSGALT0000 homeobox B7                                        | HOXB7   | 0.850701  | 2       |
| ENSGALT0000 homeobox B8                                        | HOXB8   | 0.353553  | 0.5     |
| ENSGALT0000 homeobox C10                                       | HOXC10  | ?         | 0       |
| ENSGALT0000 homeobox C11                                       | HOXC11  | 0.464758  | 0       |
| ENSGALT0000 homeobox C12                                       | HOXC12  | ?         | 0       |
| ENSGALT0000 homeobox C13                                       | HOXC13  | ?         | 0       |
| ENSGALT0000 homeobox C9                                        | HOXC9   | ?         | 0       |
| ENSGALT0000 homeobox D12                                       | HOXD12  | ?         | 0       |
| ENSGALT0000 homeobox D13                                       | HOXD13  | ?         | 0       |
| ENSGALT0000 homeobox D3                                        | HOXD3   | 0.898356  | 1       |
| ENSGALT0000 homeobox D4                                        | HOXD4   | 0.722096  | 0.5     |
| ENSGALT0000 homeobox D8                                        | HOXD8   | 0.888194  | 4       |
| ENSGALT0000 heterochromatin protein 1, binding                 | HP1BP3  | 0.950952  | 6022    |
| ENSGALT0000 hippocalcin                                        | HPCA    | 0.179324  | 13.011  |
| ENSGALT0000 hippocalcin-like 1                                 | HPCAL1  | 0.526495  | 949.487 |
| ENSGALT0000 hippocalcin like 4                                 | HPCAL4  | 0.792026  | 145     |
| ENSGALT0000 4-hydroxyphenylpyruvate dioxygen                   | HPD     | 0.799979  | 96.5    |
| ENSGALT0000 4-hydroxyphenylpyruvate dioxygen                   | HPDL    | 0.937806  | 249     |
| ENSGALT0000 hydroxyprostaglandin dehydrogenase                 | HPGD    | 0.196285  | 33.5    |
| ENSGALT0000 hematopoietic prostaglandin D synthase             | HPGDS   | 0.0218266 | 4       |
| ENSGALT0000 hypoxanthine phosphoribosyltransferase             | HPRT1   | 0.844652  | 335.999 |
| ENSGALT0000 Hermansky-Pudlak syndrome 1                        | HPS1    | 0.960034  | 1180.01 |
| ENSGALT0000 Hermansky-Pudlak syndrome 3                        | HPS3    | 0.98754   | 840.5   |
| ENSGALT0000 Hermansky-Pudlak syndrome 4                        | HPS4    | 0.949273  | 414.5   |
| ENSGALT0000 Hermansky-Pudlak syndrome 5                        | HPS5    | 0.974192  | 765     |
| ENSGALT0000 Hermansky-Pudlak syndrome 6                        | HPS6    | 0.939542  | 2101.5  |
| ENSGALT0000 heparanase                                         | HPSE    | 0.985234  | 116.5   |
| ENSGALT0000 heparanase 2                                       | HPSE2   | 0.845653  | 104     |
| ENSGALT0000 hemopexin                                          | HPX     | 0.938786  | 7       |
| ENSGALT0000 v-Ha-ras Harvey rat sarcoma viral oncogene homolog | HRAS    | 0.222212  | 7117.76 |
| ENSGALT0000 HRAS-like suppressor                               | HRASLS  | 0.888314  | 585     |
| ENSGALT0000 histidine-rich glycoprotein                        | HRG     | 0.464758  | 0.5     |
| ENSGALT0000 histamine receptor H2                              | HRH2    | 0.737616  | 18      |
| ENSGALT0000 histamine receptor H3                              | HRH3    | 0.883315  | 16.5    |
| ENSGALT0000 histamine receptor H4                              | HRH4    | 0.464758  | 0       |
| ENSGALT0000 heat-responsive protein 12                         | HRSP12  | 0.786583  | 399     |
| ENSGALT0000 HCLS1 binding protein 3                            | HS1BP3  | 0.990518  | 110.5   |
| ENSGALT0000 heparan sulfate 2-O-sulfotransferase               | HS2ST1  | 0.97199   | 1201    |
| ENSGALT0000 heparan sulfate (glucosamine) 3-O-sulfotransferase | HS3ST1  | 0.587782  | 474     |
| ENSGALT0000 heparan sulfate (glucosamine) 3-O-sulfotransferase | HS3ST2  | 0.616602  | 203.986 |
| ENSGALT0000 heparan sulfate (glucosamine) 3-O-sulfotransferase | HS3ST4  | 0.654997  | 61.9726 |
| ENSGALT0000 heparan sulfate (glucosamine) 3-O-sulfotransferase | HS3ST5  | 0.882056  | 31      |
| ENSGALT0000 heparan sulfate (glucosamine) 3-O-sulfotransferase | HS3ST6  | 0.689896  | 1926.54 |

|                                                   |          |          |         |
|---------------------------------------------------|----------|----------|---------|
| ENSGALT0000 Heparan-sulfate 6-O-sulfotransfera    | HS6ST1   | 0.956659 | 2139.82 |
| ENSGALT0000 heparan sulfate 6-O-sulfotransfera    | HS6ST2   | 0.862226 | 1321.96 |
| ENSGALT0000 heparan sulfate 6-O-sulfotransfera    | HS6ST3   | 0.863224 | 24.2244 |
| ENSGALT0000 heat shock factor binding protein 1   | HSBP1    | 0.609471 | 1455    |
| ENSGALT0000 heat shock factor binding protein 1-  | HSBP1L1  | 0.951716 | 185.5   |
| ENSGALT0000 HscB iron-sulfur cluster co-chaperc   | HSCB     | 0.536388 | 858.5   |
| ENSGALT0000 hydroxysteroid (11-beta) dehydrog     | HSD11B1  | 0.649519 | 2       |
| ENSGALT0000 hydroxysteroid (11-beta) dehydrog     | HSD11B1L | 0.975643 | 649.002 |
| ENSGALT0000 hydroxysteroid (11-beta) dehydrog     | HSD11B2  | 0.614658 | 14      |
| ENSGALT0000 hydroxysteroid (17-beta) dehydrog     | HSD17B10 | 0.714941 | 1669.5  |
| ENSGALT0000 hydroxysteroid (17-beta) dehydrog     | HSD17B11 | 0.991918 | 512     |
| ENSGALT0000 hydroxysteroid (17-beta) dehydrog     | HSD17B12 | 0.940798 | 1512.5  |
| ENSGALT0000 hydroxysteroid (17-beta) dehydrog     | HSD17B4  | 0.953428 | 1520.51 |
| ENSGALT0000 hydroxysteroid (17-beta) dehydrog     | HSD17B7  | 0.551397 | 304.5   |
| ENSGALT0000 hydroxy-delta-5-steroid dehydroger    | HSD3B1   | 0.759263 | 20.0207 |
| ENSGALT0000 hydroxy-delta-5-steroid dehydroger    | HSD3B7   | 0.464758 | 0       |
| ENSGALT0000 hydroxysteroid dehydrogenase like     | HSDL1    | 0.988236 | 425     |
| ENSGALT0000 hydroxysteroid dehydrogenase like     | HSDL2    | 0.94303  | 1976.5  |
| ENSGALT0000 heat shock transcription factor 1     | HSF1     | 0.977263 | 366     |
| ENSGALT0000 heat shock transcription factor 2     | HSF2     | 0.904986 | 1549.53 |
| ENSGALT0000 heat shock transcription factor 2 bir | HSF2BP   | 0.952691 | 116     |
| ENSGALT0000 heat shock factor protein 3           | HSF3     | 0.989089 | 658.499 |
| ENSGALT0000 heat shock transcription factor 4     | HSF4     | 0.8762   | 5       |
| ENSGALT0000 \N                                    | HSP25    | 0.182524 | 392.727 |
| ENSGALT0000 heat shock protein 90kDa alpha (cy    | HSP90AB1 | 0.873431 | 21712.4 |
| ENSGALT0000 heat shock protein 90kDa beta (Gr     | HSP90B1  | 0.970592 | 21810   |
| ENSGALT0000 heat shock 70kDa protein 12A          | HSPA12A  | 0.839954 | 1164.5  |
| ENSGALT0000 heat shock protein 70kDa family, m    | HSPA13   | 0.925662 | 328     |
| ENSGALT0000 Heat shock 70 kDa protein 14          | HSPA14   | 0.903872 | 970.005 |
| ENSGALT0000 heat shock 70kDa protein 2            | HSPA2    | 0.976408 | 7284.37 |
| ENSGALT0000 heat shock 70kDa protein 4            | HSPA4    | 0.952083 | 4583    |
| ENSGALT0000 heat shock 70kDa protein 4-like       | HSPA4L   | 0.900389 | 2598.5  |
| ENSGALT0000 heat shock 70kDa protein 5 (glucos    | HSPA5    | 0.966764 | 25657.5 |
| ENSGALT0000 heat shock 70kDa protein 8            | HSPA8    | 0.902645 | 45906.3 |
| ENSGALT0000 heat shock 70kDa protein 9 (mortal    | HSPA9    | 0.868141 | 6354.5  |
| ENSGALT0000 heat shock 27kDa protein 1            | HSPB1    | 0.842593 | 425.499 |
| ENSGALT0000 heat shock protein family B (small),  | HSPB11   | 0.822167 | 242     |
| ENSGALT0000 heat shock 27kDa protein 2            | HSPB2    | 0.889829 | 7       |
| ENSGALT0000 heat shock 27kDa protein 3            | HSPB3    | 0.696461 | 0.5     |
| ENSGALT0000 heat shock 27kDa protein family, m    | HSPB7    | 0.737648 | 7.5     |
| ENSGALT0000 heat shock 22kDa protein 8            | HSPB8    | 0.893665 | 239.5   |
| ENSGALT0000 HSPB (heat shock 27kDa) associat      | HSPBAP1  | 0.985883 | 472     |
| ENSGALT0000 heat shock 60kDa protein 1 (chape     | HSPD1    | 0.734417 | 6886    |
| ENSGALT0000 heat shock 10kDa protein 1 (chape     | HSPE1    | 0.660403 | 2542.01 |
| ENSGALT0000 heparan sulfate proteoglycan 2        | HSPG2    | 0.973875 | 14906   |
| ENSGALT0000 heat shock 105kDa/110kDa protein      | HSPH1    | 0.960914 | 1388    |
| ENSGALT0000 HIV-1 Tat interactive protein 2, 30kI | HTATIP2  | 0.395942 | 558     |
| ENSGALT0000 HIV-1 Tat specific factor 1           | HTATSF1  | 0.969894 | 1172.5  |
| ENSGALT0000 5-hydroxytryptamine (serotonin) re    | HTR1A    | 0.556899 | 391     |
| ENSGALT0000 5-hydroxytryptamine (serotonin) re    | HTR1D    | 0.988176 | 57      |
| ENSGALT0000 5-hydroxytryptamine (serotonin) re    | HTR1E    | 0.463787 | 10.5    |
| ENSGALT0000 5-hydroxytryptamine (serotonin) re    | HTR1F    | 0.776616 | 1       |
| ENSGALT0000 5-hydroxytryptamine (serotonin) re    | HTR2A    | 0.823665 | 8.5     |
| ENSGALT0000 5-hydroxytryptamine (serotonin) re    | HTR2C    | 0.870078 | 4       |
| ENSGALT0000 5-hydroxytryptamine (serotonin) re    | HTR3A    | 0.595719 | 65.5    |
| ENSGALT0000 5-hydroxytryptamine (serotonin) re    | HTR5A    | 0.631223 | 0       |



|                                                           |         |            |         |
|-----------------------------------------------------------|---------|------------|---------|
| ENSGALT0000 5-hydroxytryptamine (serotonin) receptor HTR6 |         | 0.60304    | 9.94987 |
| ENSGALT0000 5-hydroxytryptamine (serotonin) receptor HTR7 |         | 0.859361   | 9.5     |
| ENSGALT0000 HtrA serine peptidase 1                       | HTRA1   | 0.718725   | 515.497 |
| ENSGALT0000 HtrA serine peptidase 2                       | HTRA2   | 0.720636   | 789     |
| ENSGALT0000 HtrA serine peptidase 3                       | HTRA3   | 0.977299   | 139     |
| ENSGALT0000 huntingtin                                    | HTT     | 0.970414   | 1939.47 |
| ENSGALT0000 hormonally up-regulated Neu-associated HUNK   |         | 0.887566   | 314     |
| ENSGALT0000 HUS1 checkpoint homolog (S. pombe)            | HUS1    | 0.957021   | 322     |
| ENSGALT0000 hydrogen voltage-gated channel 1              | HVCN1   | 0.990668   | 3169.04 |
| ENSGALT0000 hyaluronoglucosaminidase 1                    | HYAL1   | 0.895641   | 721.5   |
| ENSGALT0000 hyaluronoglucosaminidase 2                    | HYAL2   | 0.834032   | 1770    |
| ENSGALT0000 hyaluronoglucosaminidase pseudogene           | HYALP1  | ?          | 0       |
| ENSGALT0000 axonemal central pair apparatus protein       | HYDIN   | 0.857046   | 164.5   |
| ENSGALT0000 hydroxypyruvate isomerase (putative)          | HYI     | 0.490839   | 792     |
| ENSGALT0000 hydrolethalus syndrome 1                      | HYLS1   | 0.74402    | 480.831 |
| ENSGALT0000 hypoxia up-regulated 1                        | HYOU1   | 0.976126   | 6969.41 |
| ENSGALT0000 isoamyl acetate-hydrolyzing esterase          | IAH1    | 0.65311    | 1339    |
| ENSGALT0000 islet amyloid polypeptide                     | IAPP    | 0.00893133 | 9.5     |
| ENSGALT0000 isoleucyl-tRNA synthetase                     | IARS    | 0.926009   | 3057    |
| ENSGALT0000 isoleucyl-tRNA synthetase 2, mitochondrial    | IARS2   | 0.918619   | 1678    |
| ENSGALT0000 IBA57, iron-sulfur cluster assembly protein   | IBA57   | 0.936932   | 950.496 |
| ENSGALT0000 integrin-binding sialoprotein                 | IBSP    | ?          | 0       |
| ENSGALT0000 inhibitor of Bruton agammaglobulinemia        | IBTK    | 0.977845   | 1569.5  |
| ENSGALT0000 islet cell autoantigen 1, 69kDa               | ICA1    | 0.999873   | 735.5   |
| ENSGALT0000 intestinal cell (MAK-like) kinase             | ICK     | 0.92687    | 920     |
| ENSGALT0000 isoprenylcysteine carboxyl methyltransferase  | ICMT    | 0.879143   | 1246.46 |
| ENSGALT0000 inducible T-cell co-stimulator                | ICOS    | 0.649519   | 0.5     |
| ENSGALT0000 inducible T-cell co-stimulator ligand         | ICOSLG  | 0.868324   | 98.5    |
| ENSGALT0000 immature colon carcinoma transcript           | ICT1    | 0.684279   | 635     |
| ENSGALT0000 inhibitor of DNA binding 1, dominant          | ID1     | 0.531542   | 1709.5  |
| ENSGALT0000 inhibitor of DNA binding 2, dominant          | ID2     | 0.73549    | 6010.11 |
| ENSGALT0000 inhibitor of DNA binding 4, dominant          | ID4     | 0.618232   | 2135.16 |
| ENSGALT0000 isocitrate dehydrogenase 1 (NADP-dependent)   | IDH1    | 0.904789   | 8046    |
| ENSGALT0000 isocitrate dehydrogenase 3 (NADP-dependent)   | IDH3A   | 0.950501   | 1480.52 |
| ENSGALT0000 isocitrate dehydrogenase 3, beta subunit      | IDH3B   | 0.813735   | 3309.84 |
| ENSGALT0000 isopentenyl-diphosphate delta isomerase       | IDI1    | 0.495453   | 627     |
| ENSGALT0000 iduronate 2-sulfatase                         | IDS     | 0.996028   | 562     |
| ENSGALT0000 iduronidase, alpha-L-                         | IDUA    | 0.96556    | 887     |
| ENSGALT0000 immediate early response 5                    | IER5    | 0.428287   | 353.291 |
| ENSGALT0000 intermediate filament family orphan           | IFFO1   | 0.980825   | 1257.5  |
| ENSGALT0000 ISG12-1 protein-like                          | IFI27L2 | 0.176854   | 367.5   |
| ENSGALT0000 interferon, gamma-inducible protein           | IFI30   | 0.209739   | 76      |
| ENSGALT0000 interferon-induced protein 35                 | IFI35   | 0.742191   | 423.5   |
| ENSGALT0000 interferon induced with helicase C domain     | IFIH1   | 0.999842   | 111.5   |
| ENSGALT0000 interferon induced transmembrane protein      | IFITM10 | 0.655449   | 52.5    |
| ENSGALT0000 interferon induced transmembrane protein      | IFITM5  | 0.915243   | 55.5    |
| ENSGALT0000 interferon                                    | IFNA3   | 0.949722   | 147.555 |
| ENSGALT0000 interferon (alpha, beta and omega)            | IFNAR1  | 0.925747   | 510.5   |
| ENSGALT0000 interferon (alpha, beta and omega)            | IFNAR2  | 0.948327   | 950.5   |
| ENSGALT0000 interferon beta                               | IFNB    | 0.898356   | 1       |
| ENSGALT0000 interferon, gamma                             | IFNG    | ?          | 0       |
| ENSGALT0000 interferon gamma receptor 1                   | IFNGR1  | 0.962191   | 247     |
| ENSGALT0000 interferon gamma receptor 2 (interferon)      | IFNGR2  | 0.993825   | 1107    |
| ENSGALT0000 interferon-related developmental regulator    | IFRD1   | 0.893515   | 2037    |
| ENSGALT0000 intraflagellar transport 122 homolog          | IFT122  | 0.985494   | 2504.5  |
| ENSGALT0000 intraflagellar transport 140 homolog          | IFT140  | 0.990814   | 1690.5  |

|                                                                            |          |         |
|----------------------------------------------------------------------------|----------|---------|
| ENSGALT0000 intraflagellar transport 172 homolog IFT172                    | 0.992311 | 3747.5  |
| ENSGALT0000 intraflagellar transport 20 homolog IFT20                      | 0.954135 | 1400    |
| ENSGALT0000 intraflagellar transport 27 homolog IFT27                      | 0.897805 | 279     |
| ENSGALT0000 intraflagellar transport 43 homolog IFT43                      | 0.804721 | 204     |
| ENSGALT0000 intraflagellar transport 46 homolog IFT46                      | 0.995588 | 1009    |
| ENSGALT0000 intraflagellar transport 52 homolog IFT52                      | 0.949388 | 990.492 |
| ENSGALT0000 intraflagellar transport 57 homolog IFT57                      | 0.930444 | 1014    |
| ENSGALT0000 intraflagellar transport 74 homolog IFT74                      | 0.996227 | 422.5   |
| ENSGALT0000 intraflagellar transport 80 homolog IFT80                      | 0.996924 | 1583.49 |
| ENSGALT0000 intraflagellar transport 81 homolog IFT81                      | 0.998024 | 672     |
| ENSGALT0000 intraflagellar transport 88 homolog IFT88                      | 0.951345 | 849.5   |
| ENSGALT0000 immunoglobulin (CD79A) binding protein IGBP1                   | 0.619797 | 1272.5  |
| ENSGALT0000 immunoglobulin superfamily, DCC subfamily IGDCC3               | 0.971956 | 1222.01 |
| ENSGALT0000 immunoglobulin superfamily, DCC subfamily IGDCC4               | 0.999785 | 2017    |
| ENSGALT0000 insulin-like growth factor 1 (somatomedin) IGF1                | ?        | 0       |
| ENSGALT0000 insulin-like growth factor 1 receptor IGF1R                    | 0.987222 | 6780.24 |
| ENSGALT0000 insulin-like growth factor 2 (somatomedin) IGF2                | 0.837425 | 106     |
| ENSGALT0000 insulin-like growth factor 2 mRNA binding protein 1 IGF2BP1    | 0.993447 | 3488.5  |
| ENSGALT0000 insulin-like growth factor 2 mRNA binding protein 2 IGF2BP2    | 0.998983 | 2674.48 |
| ENSGALT0000 insulin-like growth factor 2 mRNA binding protein 3 IGF2BP3    | 0.980836 | 6772.5  |
| ENSGALT0000 insulin-like growth factor 2 receptor IGF2R                    | 0.986216 | 2061.51 |
| ENSGALT0000 insulin-like growth factor binding protein 1 IGFBP1            | 0.724567 | 29      |
| ENSGALT0000 insulin-like growth factor binding protein 2 IGFBP2            | 0.716497 | 5.5     |
| ENSGALT0000 insulin-like growth factor binding protein 3 IGFBP3            | 0.837842 | 3802.94 |
| ENSGALT0000 insulin-like growth factor binding protein 4 IGFBP4            | 0.929675 | 102.5   |
| ENSGALT0000 insulin-like growth factor binding protein 5 IGFBP5            | 0.722635 | 1850.99 |
| ENSGALT0000 insulin-like growth factor binding protein 6 IGFBP6            | 0.901901 | 1912    |
| ENSGALT0000 insulin-like growth factor binding protein 7 IGFBP7            | 0.901901 | 1912    |
| ENSGALT0000 immunoglobulin-like and fibronectin type III domain IGFN1      | 0.521698 | 904.5   |
| ENSGALT0000 immunoglobulin mu binding protein IGHMBP2                      | 0.939533 | 1037    |
| ENSGALT0000 immunoglobulin J polypeptide, linked IIGJ                      | 0.815415 | 9.1894  |
| ENSGALT0000 immunoglobulin superfamily, member IGSF1                       | 0.814911 | 2.5     |
| ENSGALT0000 immunoglobulin superfamily, member IGSF10                      | 0.848605 | 330.5   |
| ENSGALT0000 immunoglobulin superfamily, member IGSF11                      | 0.727485 | 91.5    |
| ENSGALT0000 immunoglobulin superfamily, member IGSF21                      | 0.794874 | 163     |
| ENSGALT0000 immunoglobulin superfamily, member IGSF3                       | 0.947611 | 4701.67 |
| ENSGALT0000 immunoglobulin superfamily, member IGSF5                       | 0.805648 | 13.5    |
| ENSGALT0000 immunoglobulin superfamily, member IGSF6                       | 0.927592 | 59.5    |
| ENSGALT0000 immunoglobulin superfamily, member IGSF9                       | 0.988875 | 8291.26 |
| ENSGALT0000 immunoglobulin superfamily, member IGSF9B                      | 0.859928 | 244.5   |
| ENSGALT0000 Indian hedgehog homolog IHH                                    | 0.164317 | 0       |
| ENSGALT0000 IK cytokine, down-regulator of HLA IIK                         | 0.762088 | 2985    |
| ENSGALT0000 IKBKB interacting protein IKBIP                                | 0.991878 | 261.5   |
| ENSGALT0000 inhibitor of kappa light polypeptide chain IKBKAP              | 0.904582 | 833.993 |
| ENSGALT0000 inhibitor of kappa light polypeptide chain IKBKB               | 0.96106  | 891.495 |
| ENSGALT0000 inhibitor of kappa light polypeptide chain IKBKE               | 0.965106 | 37.5    |
| ENSGALT0000 IKAROS family zinc finger 1 (Ikzf) IKZF1                       | 0.744025 | 10      |
| ENSGALT0000 IKAROS family zinc finger 2 (Helios) IKZF2                     | 0.992526 | 529.445 |
| ENSGALT0000 lymphoid transcription factor IKZF3                            | 0.685306 | 73.0544 |
| ENSGALT0000 zinc finger protein, subfamily 1A, 5 IKZF5                     | 0.993072 | 369.999 |
| ENSGALT0000 interleukin 10 IL10                                            | 0.19245  | 1       |
| ENSGALT0000 interleukin 10 receptor, alpha IL10RA                          | 0.913872 | 82      |
| ENSGALT0000 interleukin 10 receptor, beta IL10RB                           | 0.986315 | 254.5   |
| ENSGALT0000 interleukin 11 receptor, alpha IL11RA                          | 0.795846 | 568     |
| ENSGALT0000 interleukin 12A (natural killer cell stimulatory factor) IL12A | 0.985038 | 2.5     |
| ENSGALT0000 interleukin 12B (natural killer cell stimulatory factor) IL12B | 0.554363 | 0.5     |
| ENSGALT0000 interleukin 12 receptor, beta 2 IL12RB2                        | 0.90773  | 1.5     |

|                                                   |          |           |         |
|---------------------------------------------------|----------|-----------|---------|
| ENSGALT0000 interleukin 13                        | IL13     | 0.464758  | 0       |
| ENSGALT0000 interleukin 13 receptor, alpha 1      | IL13RA1  | 0.994853  | 76      |
| ENSGALT0000 interleukin 13 receptor, alpha 2      | IL13RA2  | 0.900922  | 20.5453 |
| ENSGALT0000 interleukin 15                        | IL15     | 0.716057  | 2.5     |
| ENSGALT0000 interleukin 16 (lymphocyte chemoa     | IL16     | 0.848021  | 123.5   |
| ENSGALT0000 interleukin 17B                       | IL17B    | 0.865211  | 2.5     |
| ENSGALT0000 interleukin 17D                       | IL17D    | 0.896679  | 22      |
| ENSGALT0000 interleukin 17F                       | IL17F    | 0.464758  | 0       |
| ENSGALT0000 interleukin 17 receptor A             | IL17RA   | 0.994587  | 544.497 |
| ENSGALT0000 interleukin 17 receptor D             | IL17RD   | 0.821135  | 722.999 |
| ENSGALT0000 interleukin 17 receptor E-like        | IL17REL  | 0.165497  | 5       |
| ENSGALT0000 interleukin 18 (interferon-gamma-in   | IL18     | 0.902263  | 6.5     |
| ENSGALT0000 interleukin 18 receptor 1             | IL18R1   | 0.932599  | 16.5    |
| ENSGALT0000 interleukin 18 receptor accessory p   | IL18RAP  | 0.649519  | 0.5     |
| ENSGALT0000 interleukin 19                        | IL19     | ?         | 0       |
| ENSGALT0000 interleukin 1, beta                   | IL1B     | 0.493354  | 2       |
| ENSGALT0000 interleukin 1 receptor, type I        | IL1R1    | 0.97386   | 40      |
| ENSGALT0000 interleukin 1 receptor, type II       | IL1R2    | 0.757073  | 1       |
| ENSGALT0000 interleukin 1 receptor accessory pr   | IL1RAP   | 0.981332  | 1266    |
| ENSGALT0000 interleukin 1 receptor accessory pr   | IL1RAPL1 | 0.990919  | 58      |
| ENSGALT0000 interleukin 1 receptor accessory pr   | IL1RAPL2 | 0.611696  | 244.5   |
| ENSGALT0000 interleukin 1 receptor-like 1         | IL1RL1   | 0.865869  | 19      |
| ENSGALT0000 interleukin 1 receptor-like 2         | IL1RL2   | 0.881321  | 155     |
| ENSGALT0000 interleukin 2                         | IL2      | ?         | 0       |
| ENSGALT0000 interleukin 20 receptor, alpha        | IL20RA   | 0.955431  | 60      |
| ENSGALT0000 interleukin 20 receptor beta          | IL20RB   | 0.268957  | 0.5     |
| ENSGALT0000 interleukin 21                        | IL21     | ?         | 0       |
| ENSGALT0000 interleukin 21 receptor               | IL21R    | 0.455369  | 1.5     |
| ENSGALT0000 interleukin 22                        | IL22     | 0.649519  | 0.5     |
| ENSGALT0000 interleukin 22 receptor, alpha 1      | IL22RA1  | 0.686782  | 363     |
| ENSGALT0000 interleukin 22 receptor, alpha 2      | IL22RA2  | 0.0741325 | 3       |
| ENSGALT0000 interleukin 23 receptor               | IL23R    | 0.93777   | 11.5    |
| ENSGALT0000 interleukin 26                        | IL26     | ?         | 0       |
| ENSGALT0000 interleukin 28B (interferon, lambda   | IL28B    | 0.853815  | 1       |
| ENSGALT0000 interleukin 28 receptor, alpha (inter | IL28RA   | 0.978657  | 65      |
| ENSGALT0000 interleukin 2 receptor, alpha         | IL2RA    | 0.649519  | 0.5     |
| ENSGALT0000 interleukin 2 receptor, beta          | IL2RB    | 0.907389  | 4       |
| ENSGALT0000 interleukin 2 receptor, gamma (sevi   | IL2RG    | 0.419222  | 39      |
| ENSGALT0000 interleukin 3                         | IL3      | ?         | 0       |
| ENSGALT0000 interleukin 31 receptor A             | IL31RA   | 0.883992  | 15.5    |
| ENSGALT0000 interleukin 4                         | IL4      | 0.464758  | 0       |
| ENSGALT0000 interleukin 4 induced 1               | IL4I1    | 0.853815  | 2       |
| ENSGALT0000 interleukin 4 receptor                | IL4R     | 0.996604  | 151.5   |
| ENSGALT0000 interleukin 5                         | IL5      | ?         | 0       |
| ENSGALT0000 interleukin 5 receptor, alpha         | IL5RA    | 0.982463  | 31.5    |
| ENSGALT0000 interleukin 6 (interferon, beta 2)    | IL6      | 0.821187  | 1.5     |
| ENSGALT0000 interleukin 6 signal transducer (gp1  | IL6ST    | 0.929957  | 761.5   |
| ENSGALT0000 interleukin 7                         | IL7      | 0.464758  | 0       |
| ENSGALT0000 interleukin 7 receptor                | IL7R     | ?         | 0       |
| ENSGALT0000 interleukin 8                         | IL8      | 0.853815  | 1       |
| ENSGALT0000 interleukin 9                         | IL9      | ?         | 0       |
| ENSGALT0000 interleukin 9 receptor                | IL9R     | 0.319424  | 0       |
| ENSGALT0000 immunoglobulin-like domain containi   | ILDR1    | 0.993538  | 840.5   |
| ENSGALT0000 immunoglobulin-like domain containi   | ILDR2    | 0.997192  | 796.51  |
| ENSGALT0000 interleukin enhancer binding factor   | ILF2     | 0.839245  | 9843    |
| ENSGALT0000 integrin-linked kinase                | ILK      | 0.814902  | 4007    |

|                                                         |          |         |
|---------------------------------------------------------|----------|---------|
| ENSGALT0000 integrin-linked kinase-associated sILKAP    | 0.698595 | 1561.5  |
| ENSGALT0000 IMP1 inner mitochondrial membranIMMP1L      | 0.947062 | 178.5   |
| ENSGALT0000 IMP2 inner mitochondrial membranIMMP2L      | 0.953886 | 83.5    |
| ENSGALT0000 inner membrane protein, mitochondoncIMMT    | 0.892807 | 3517    |
| ENSGALT0000 IMP3, U3 small nucleolar ribonucle IMP3     | 0.193267 | 1002    |
| ENSGALT0000 inositol(myo)-1(or 4)-monophosphat IMPA1    | 0.880982 | 586     |
| ENSGALT0000 inositol(myo)-1(or 4)-monophosphat IMPA2    | 0.986401 | 440.5   |
| ENSGALT0000 Impact homolog (mouse) IMPACT               | 0.857515 | 133.5   |
| ENSGALT0000 inositol monophosphatase domain IMPAD1      | 0.893045 | 1050.5  |
| ENSGALT0000 IMP (inosine 5'-monophosphate) d IMPDH2     | 0.762345 | 6025.53 |
| ENSGALT0000 interphotoreceptor matrix proteogly IMPG1   | 0.818488 | 8       |
| ENSGALT0000 interphotoreceptor matrix proteogly IMPG2   | 0.992581 | 162.5   |
| ENSGALT0000 InaD-like (Drosophila) INADL                | 0.997768 | 2058    |
| ENSGALT0000 inner centromere protein antigens INCENP    | 0.897095 | 2089.03 |
| ENSGALT0000 indoleamine-pyrrole 2,3 dioxygenas INDOL1   | 0.643623 | 0.5     |
| ENSGALT0000 inverted formin, FH2 and WH2 dom INF2       | 0.942417 | 174.5   |
| ENSGALT0000 inhibitor of growth family, member ING1     | 0.959262 | 571.5   |
| ENSGALT0000 inhibitor of growth family, member ING2     | 0.990659 | 177.5   |
| ENSGALT0000 inhibitor of growth family, member ING3     | 0.954937 | 426.5   |
| ENSGALT0000 inhibitor of growth family, member ING4     | 0.930457 | 1318.32 |
| ENSGALT0000 inhibitor of growth family, member ING5     | 0.941348 | 545.682 |
| ENSGALT0000 inhibin, alpha INHA                         | 0.859517 | 18.5    |
| ENSGALT0000 inhibin, beta A INHBA                       | 0.703988 | 102.5   |
| ENSGALT0000 INO80 homolog (S. cerevisiae) INO80         | 0.968523 | 834.5   |
| ENSGALT0000 INO80 complex subunit B INO80B              | 0.635132 | 745.5   |
| ENSGALT0000 INO80 complex subunit C INO80C              | 0.917151 | 169.5   |
| ENSGALT0000 INO80 complex subunit D INO80D              | 0.99387  | 497     |
| ENSGALT0000 inositol polyphosphate-4-phosphat INPP4A    | 0.909081 | 1106    |
| ENSGALT0000 inositol polyphosphate-4-phosphat INPP4B    | 0.960517 | 261     |
| ENSGALT0000 inositol polyphosphate-5-phosphat INPP5A    | 0.964125 | 461.5   |
| ENSGALT0000 inositol polyphosphate-5-phosphat INPP5B    | 0.984434 | 618     |
| ENSGALT0000 inositol polyphosphate-5-phosphat INPP5D    | 0.777911 | 66      |
| ENSGALT0000 inositol polyphosphate-5-phosphat INPP5E    | 0.964417 | 945.325 |
| ENSGALT0000 inositol polyphosphate-5-phosphat INPP5F    | 0.96749  | 872     |
| ENSGALT0000 inositol polyphosphate-5-phosphat INPP5J    | 0.974168 | 621.5   |
| ENSGALT0000 inositol polyphosphate-5-phosphat INPP5K    | 0.969003 | 1863.5  |
| ENSGALT0000 inositol polyphosphate phosphatas INPPL1    | 0.50752  | 11.5    |
| ENSGALT0000 insulin INS                                 | 0.562993 | 0.5     |
| ENSGALT0000 inscuteable homolog (Drosophila) INSC       | 0.834281 | 176.5   |
| ENSGALT0000 insulin induced gene 1 INSIG1               | 0.751954 | 78      |
| ENSGALT0000 insulin induced gene 2 INSIG2               | 0.991791 | 164     |
| ENSGALT0000 insulin receptor INSR                       | 0.997138 | 5216    |
| ENSGALT0000 integrator complex subunit 1 INTS1          | 0.969181 | 4684.5  |
| ENSGALT0000 integrator complex subunit 10 INTS10        | 0.952878 | 1306    |
| ENSGALT0000 integrator complex subunit 12 INTS12        | 0.923512 | 526.5   |
| ENSGALT0000 integrator complex subunit 2 INTS2          | 0.938158 | 4136.5  |
| ENSGALT0000 integrator complex subunit 6 INTS6          | 0.998331 | 1514    |
| ENSGALT0000 integrator complex subunit 7 INTS7          | 0.963042 | 1145.99 |
| ENSGALT0000 integrator complex subunit 8 INTS8          | 0.948736 | 2350.5  |
| ENSGALT0000 integrator complex subunit 9 INTS9          | 0.963525 | 2017.5  |
| ENSGALT0000 inturned planar cell polarity effector INTU | 0.949351 | 426     |
| ENSGALT0000 inversin INVS                               | 0.988442 | 581.169 |
| ENSGALT0000 inositol hexakisphosphate kinase 1 IP6K1    | 0.964026 | 2539.5  |
| ENSGALT0000 inositol hexakisphosphate kinase 2 IP6K2    | 0.888993 | 2090.98 |
| ENSGALT0000 inositol hexakisphosphate kinase 3 IP6K3    | 0.72395  | 502.5   |
| ENSGALT0000 inositol polyphosphate multikinase IPMK     | 0.968996 | 418.498 |

|                                                   |          |          |         |
|---------------------------------------------------|----------|----------|---------|
| ENSGALT0000 importin 11                           | IPO11    | 0.974349 | 892.498 |
| ENSGALT0000 importin 13                           | IPO13    | 0.933956 | 3987.86 |
| ENSGALT0000 importin 5                            | IPO5     | 0.993386 | 13263.5 |
| ENSGALT0000 importin 7                            | IPO7     | 0.962516 | 6501.5  |
| ENSGALT0000 importin 8                            | IPO8     | 0.959988 | 2335    |
| ENSGALT0000 importin 9                            | IPO9     | 0.974922 | 3802.5  |
| ENSGALT0000 intracisternal A particle-promoted p  | IPP      | 0.892317 | 514.5   |
| ENSGALT0000 inositol 1,3,4,5,6-pentakisphosphat   | IPPK     | 0.997226 | 539.003 |
| ENSGALT0000 IQ motif containing with AAA domai    | IQCA1    | 0.979734 | 18      |
| ENSGALT0000 IQ motif containing B1                | IQCB1    | 0.996996 | 378     |
| ENSGALT0000 IQ motif containing C                 | IQCC     | 0.954909 | 251.5   |
| ENSGALT0000 IQ motif containing D                 | IQCD     | 0.992627 | 445.5   |
| ENSGALT0000 IQ motif containing E                 | IQCE     | 0.991584 | 1055.5  |
| ENSGALT0000 IQ motif containing G                 | IQCG     | 0.974667 | 37.5    |
| ENSGALT0000 IQ motif containing H                 | IQCH     | 0.982456 | 372     |
| ENSGALT0000 IQ motif containing J                 | IQCJ     | 0.306346 | 6.5     |
| ENSGALT0000 IQ motif containing GTPase activat    | IQGAP1   | 0.988728 | 4652.5  |
| ENSGALT0000 IQ motif containing GTPase activat    | IQGAP2   | 0.940693 | 847.5   |
| ENSGALT0000 IQ motif and Sec7 domain 1            | IQSEC1   | 0.920931 | 779     |
| ENSGALT0000 IQ motif and Sec7 domain 3            | IQSEC3   | 0.798203 | 165     |
| ENSGALT0000 IQ motif and ubiquitin domain conta   | IQUB     | 0.970039 | 110     |
| ENSGALT0000 interleukin-1 receptor-associated ki  | IRAK1BP1 | 0.653617 | 266     |
| ENSGALT0000 interleukin-1 receptor-associated ki  | IRAK2    | 0.994943 | 1952.01 |
| ENSGALT0000 interleukin-1 receptor-associated ki  | IRAK4    | 0.989897 | 263.999 |
| ENSGALT0000 iron-responsive element binding pr    | IREB2    | 0.91955  | 3206.1  |
| ENSGALT0000 interferon regulatory factor 1        | IRF1     | 0.589988 | 6       |
| ENSGALT0000 interferon regulatory factor 10       | IRF10    | 0.65125  | 67.5    |
| ENSGALT0000 interferon regulatory factor 2        | IRF2     | 0.986332 | 440.5   |
| ENSGALT0000 interferon regulatory factor 2 bindin | IRF2BP2  | 0.823616 | 729     |
| ENSGALT0000 interferon regulatory factor 2 bindin | IRF2BPL  | 0.86654  | 2776.5  |
| ENSGALT0000 interferon regulatory factor 4        | IRF4     | 0.916781 | 12      |
| ENSGALT0000 interferon regulatory factor 6        | IRF6     | 0.983833 | 1262    |
| ENSGALT0000 interferon regulatory factor 7        | IRF7     | 0.982646 | 195     |
| ENSGALT0000 interferon regulatory factor 8        | IRF8     | 0.894145 | 650.5   |
| ENSGALT0000 immunoresponsive 1 homolog (mo        | IRG1     | 0.874121 | 38.5    |
| ENSGALT0000 insulin receptor substrate 1          | IRS1     | 0.970692 | 631     |
| ENSGALT0000 insulin receptor substrate 2          | IRS2     | 0.919365 | 1320.5  |
| ENSGALT0000 insulin receptor substrate 4          | IRS4     | 0.997586 | 1567.5  |
| ENSGALT0000 iroquois homeobox 1                   | IRX1     | 0.748466 | 977.504 |
| ENSGALT0000 iroquois homeobox 2                   | IRX2     | 0.63554  | 917.56  |
| ENSGALT0000 iroquois homeobox 5                   | IRX5     | 0.861074 | 1061    |
| ENSGALT0000 iron-sulfur cluster assembly 1 homc   | ISCA1    | 0.605938 | 1121.5  |
| ENSGALT0000 iron-sulfur cluster assembly 2 homc   | ISCA2    | 0.452773 | 1338    |
| ENSGALT0000 iron-sulfur cluster scaffold homolog  | ISCU     | 0.73277  | 589.502 |
| ENSGALT0000 ISG12-2 protein-like                  | ISG12-2  | 0.301196 | 2.5     |
| ENSGALT0000 interferon stimulated exonuclease     | ISG20L2  | 0.909591 | 670     |
| ENSGALT0000 immunoglobulin superfamily contain    | ISLR     | 0.98816  | 902     |
| ENSGALT0000 isthmin 1 homolog (zebrafish)         | ISM1     | 0.553459 | 576.997 |
| ENSGALT0000 isthmin 2 homolog (zebrafish)         | ISM2     | 0.964597 | 287     |
| ENSGALT0000 isochorismatase domain containing     | ISOC1    | 0.538593 | 258.499 |
| ENSGALT0000 isoprenoid synthase domain contain    | ISPD     | 0.98142  | 179     |
| ENSGALT0000 ISY1 splicing factor homolog (S. ce   | ISY1     | 0.945903 | 609.5   |
| ENSGALT0000 itchy E3 ubiquitin protein ligase hor | ITCH     | 0.984275 | 521.5   |
| ENSGALT0000 integrin alpha FG-GAP repeat cont     | ITFG1    | 0.897561 | 3531.93 |
| ENSGALT0000 integrin alpha FG-GAP repeat cont     | ITFG2    | 0.956973 | 772.5   |
| ENSGALT0000 integrin alpha FG-GAP repeat cont     | ITFG3    | 0.992625 | 1738.5  |

|                                                            |          |          |         |
|------------------------------------------------------------|----------|----------|---------|
| ENSGALT0000 integrin, alpha 1                              | ITGA1    | 0.809323 | 114.5   |
| ENSGALT0000 integrin, alpha 11                             | ITGA11   | 0.570591 | 233     |
| ENSGALT0000 integrin, alpha 4 (antigen CD49D, $\epsilon$ ) | ITGA4    | 0.941355 | 1105.5  |
| ENSGALT0000 integrin, alpha 6                              | ITGA6    | 0.825107 | 3053.51 |
| ENSGALT0000 integrin, alpha 8                              | ITGA8    | 0.961713 | 2203.5  |
| ENSGALT0000 integrin, alpha 9                              | ITGA9    | 0.954117 | 1816.5  |
| ENSGALT0000 integrin, alpha V (vitronectin recept          | ITGAV    | 0.985338 | 1537.05 |
| ENSGALT0000 integrin, beta 1 (fibronectin recepto          | ITGB1    | 0.970439 | 9250.49 |
| ENSGALT0000 integrin beta 1 binding protein 1              | ITGB1BP1 | 0.941337 | 310.5   |
| ENSGALT0000 integrin beta 1 binding protein (mel           | ITGB1BP2 | 0.717459 | 4.5     |
| ENSGALT0000 integrin beta 1 binding protein 3              | ITGB1BP3 | 0.397075 | 12136.2 |
| ENSGALT0000 integrin, beta 2 (complement comp              | ITGB2    | 0.558689 | 37.5    |
| ENSGALT0000 integrin, beta 3 (platelet glycoprotei         | ITGB3    | 0.866352 | 6358.5  |
| ENSGALT0000 integrin beta 3 binding protein (beta          | ITGB3BP  | 0.94626  | 110.5   |
| ENSGALT0000 integrin, beta 5                               | ITGB5    | 0.966309 | 6042.5  |
| ENSGALT0000 integrin, beta 6                               | ITGB6    | 0.673998 | 5046    |
| ENSGALT0000 integrin, beta 8                               | ITGB8    | 0.96069  | 1391.1  |
| ENSGALT0000 integrin, beta-like 1 (with EGF-like r         | ITGBL1   | 0.555948 | 47.5    |
| ENSGALT0000 inter-alpha-trypsin inhibitor heavy c          | ITIH3    | ?        | 0       |
| ENSGALT0000 inter-alpha (globulin) inhibitor H5            | ITIH5    | 0.792176 | 33      |
| ENSGALT0000 inter-alpha-trypsin inhibitor heavy c          | ITIH6    | 0.761254 | 33      |
| ENSGALT0000 IL2-inducible T-cell kinase                    | ITK      | 0.832016 | 1.5     |
| ENSGALT0000 integral membrane protein 2A                   | ITM2A    | 0.992997 | 16389   |
| ENSGALT0000 integral membrane protein 2B                   | ITM2B    | 0.801017 | 7194.5  |
| ENSGALT0000 integral membrane protein 2C                   | ITM2C    | 0.921998 | 165.5   |
| ENSGALT0000 inosine triphosphatase (nucleoside             | ITPA     | 0.704383 | 1019    |
| ENSGALT0000 inositol-tetrakisphosphate 1-kinase            | ITPK1    | 0.820894 | 1107.5  |
| ENSGALT0000 inositol 1,4,5-trisphosphate 3-kinas           | ITPKA    | 0.953292 | 433.501 |
| ENSGALT0000 inositol-trisphosphate 3-kinase B              | ITPKB    | 0.988388 | 555.5   |
| ENSGALT0000 inositol 1,4,5-trisphosphate recepto           | ITPR1    | 0.858065 | 3847.32 |
| ENSGALT0000 inositol 1,4,5-trisphosphate recepto           | ITPR2    | 0.978978 | 997     |
| ENSGALT0000 inositol 1,4,5-trisphosphate recepto           | ITPR3    | 0.897025 | 2812.71 |
| ENSGALT0000 inositol 1,4,5-trisphosphate recepto           | ITPRIP   | 0.971157 | 55.5    |
| ENSGALT0000 intersectin 1 (SH3 domain protein)             | ITSN1    | 0.931997 | 2725.5  |
| ENSGALT0000 intersectin 2                                  | ITSN2    | 0.973585 | 1310.99 |
| ENSGALT0000 isovaleryl-CoA dehydrogenase                   | IVD      | 0.867382 | 972.5   |
| ENSGALT0000 influenza virus NS1A binding protei            | IVNS1ABP | 0.973694 | 2553    |
| ENSGALT0000 IWS1 homolog (S. cerevisiae)                   | IWS1     | 0.951368 | 2002.5  |
| ENSGALT0000 iodotyrosine deiodinase                        | IYD      | 0.60955  | 12.5    |
| ENSGALT0000 jagged 1                                       | JAG1     | 0.96141  | 9399.5  |
| ENSGALT0000 jagged 2                                       | JAG2     | 0.864504 | 1329.5  |
| ENSGALT0000 Janus kinase 1                                 | JAK1     | 0.95966  | 2626.03 |
| ENSGALT0000 janus kinase 2                                 | JAK2     | 0.988097 | 380.5   |
| ENSGALT0000 janus kinase and microtubule inter             | JAKMIP1  | 0.623826 | 9.5     |
| ENSGALT0000 janus kinase and microtubule inter             | JAKMIP2  | 0.979769 | 1967    |
| ENSGALT0000 Janus kinase and microtubule inter             | JAKMIP3  | 0.892441 | 20.5    |
| ENSGALT0000 junctional adhesion molecule 2                 | JAM2     | 0.995583 | 142     |
| ENSGALT0000 junctional adhesion molecule 3                 | JAM3     | 0.876964 | 1189.5  |
| ENSGALT0000 jumonji, AT rich interactive domain            | JARID2   | 0.977953 | 3074    |
| ENSGALT0000 JAZF zinc finger 1                             | JAZF1    | 0.88061  | 77.5    |
| ENSGALT0000 Jun dimerization protein 2                     | JDP2     | 0.770475 | 304     |
| ENSGALT0000 jumonji C domain containing histon             | JHDM1D   | 0.942671 | 471.5   |
| ENSGALT0000 JNK1/MAPK8-associated membrar                  | JKAMP    | 0.944313 | 912     |
| ENSGALT0000 jumonji domain containing 1C                   | JMJD1C   | 0.980538 | 2711.5  |
| ENSGALT0000 jumonji domain containing 4                    | JMJD4    | 0.911938 | 1627.5  |
| ENSGALT0000 jumonji domain containing 5                    | JMJD5    | 0.764756 | 274.5   |

|                                                    |         |          |         |
|----------------------------------------------------|---------|----------|---------|
| ENSGALT0000 jumonji domain containing 6            | JMJD6   | 0.973559 | 1764.8  |
| ENSGALT0000 jumonji domain containing 7            | JMJD7   | 0.866194 | 187.5   |
| ENSGALT0000 junction mediating and regulatory p    | JMY     | 0.991825 | 598.5   |
| ENSGALT0000 Josephin domain containing 1           | JOSD1   | 0.981538 | 720.5   |
| ENSGALT0000 junctophilin 1                         | JPH1    | 0.973502 | 1296    |
| ENSGALT0000 junctophilin 3                         | JPH3    | 0.719002 | 639     |
| ENSGALT0000 junctional sarcoplasmic reticulum p    | JSRP1   | 0.831653 | 12      |
| ENSGALT0000 jun proto-oncogene                     | JUN     | 0.658739 | 2929.94 |
| ENSGALT0000 K123 protein                           | K123    | 0.464758 | 1       |
| ENSGALT0000 Kallmann syndrome 1 sequence           | KAL1    | 0.899441 | 489.5   |
| ENSGALT0000 kalirin, RhoGEF kinase                 | KALRN   | 0.912388 | 1975    |
| ENSGALT0000 KN motif and ankyrin repeat domai      | KANK1   | 0.915014 | 1634.29 |
| ENSGALT0000 KN motif and ankyrin repeat domai      | KANK3   | 0.687992 | 423.501 |
| ENSGALT0000 KN motif and ankyrin repeat domai      | KANK4   | 0.888653 | 1960.08 |
| ENSGALT0000 KAT8 regulatory NSL complex subu       | KANSL1L | 0.980958 | 871     |
| ENSGALT0000 KAT8 regulatory NSL complex subu       | KANSL3  | 0.949745 | 1580    |
| ENSGALT0000 lysyl-tRNA synthetase                  | KARS    | 0.871907 | 5391.52 |
| ENSGALT0000 K(lysine) acetyltransferase 2A         | KAT2A   | 0.847082 | 2225    |
| ENSGALT0000 K(lysine) acetyltransferase 2B         | KAT2B   | 0.990768 | 539     |
| ENSGALT0000 K(lysine) acetyltransferase 6A         | KAT6A   | 0.982856 | 952     |
| ENSGALT0000 katanin p60 (ATPase containing) su     | KATNA1  | 0.998115 | 374.5   |
| ENSGALT0000 katanin p60 subunit A-like 1           | KATNAL1 | 0.945414 | 501.5   |
| ENSGALT0000 katanin p60 subunit A-like 2           | KATNAL2 | 0.924582 | 92.5    |
| ENSGALT0000 katanin p80 (WD repeat containing      | KATNB1  | 0.974315 | 1284.51 |
| ENSGALT0000 Kazal-type serine peptidase inhibit    | KAZALD1 | 0.780184 | 4319    |
| ENSGALT0000 kazrin, periplakin interacting proteir | KAZN    | 0.932667 | 534.5   |
| ENSGALT0000 kainate binding protein                | KBP     | 0.991332 | 107     |
| ENSGALT0000 kelch repeat and BTB (POZ) doma        | KBTBD10 | 0.912605 | 138.5   |
| ENSGALT0000 kelch repeat and BTB (POZ) doma        | KBTBD11 | 0.869929 | 789.5   |
| ENSGALT0000 kelch repeat and BTB (POZ) doma        | KBTBD13 | 0.706531 | 2.5     |
| ENSGALT0000 kelch repeat and BTB (POZ) doma        | KBTBD2  | 0.952761 | 478.5   |
| ENSGALT0000 kelch repeat and BTB (POZ) doma        | KBTBD3  | 0.803164 | 49      |
| ENSGALT0000 kelch repeat and BTB (POZ) doma        | KBTBD4  | 0.942384 | 805.5   |
| ENSGALT0000 kelch repeat and BTB (POZ) doma        | KBTBD5  | 0.473204 | 30      |
| ENSGALT0000 kelch repeat and BTB (POZ) doma        | KBTBD8  | 0.87799  | 413.5   |
| ENSGALT0000 potassium channel modulatory fact      | KCMF1   | 0.915517 | 866.521 |
| ENSGALT0000 potassium voltage-gated channel, ε     | KCNA1   | 0.906849 | 37      |
| ENSGALT0000 Potassium voltage-gated channel s      | KCNA10  | 0.303115 | 3.91374 |
| ENSGALT0000 potassium voltage-gated channel, ε     | KCNA2   | 0.86047  | 205.561 |
| ENSGALT0000 potassium voltage-gated channel, ε     | KCNA3   | 0.999723 | 191.685 |
| ENSGALT0000 potassium voltage-gated channel, ε     | KCNA4   | 0.962345 | 68.5    |
| ENSGALT0000 potassium voltage-gated channel, ε     | KCNA5   | 0.933408 | 185.5   |
| ENSGALT0000 potassium voltage-gated channel, ε     | KCNA6   | 0.872923 | 444.34  |
| ENSGALT0000 potassium voltage-gated channel, ε     | KCNAB1  | 0.755817 | 714.499 |
| ENSGALT0000 potassium voltage-gated channel, ε     | KCNAB2  | 0.682493 | 1966.5  |
| ENSGALT0000 potassium voltage-gated channel, ε     | KCNB1   | 0.818156 | 61      |
| ENSGALT0000 potassium voltage-gated channel, ε     | KCNB2   | 0.798537 | 88.5001 |
| ENSGALT0000 potassium voltage-gated channel, ε     | KCNC1   | 0.813011 | 127.413 |
| ENSGALT0000 potassium voltage-gated channel, ε     | KCNC2   | 0.900405 | 295.087 |
| ENSGALT0000 potassium voltage-gated channel, ε     | KCNC4   | 0.712598 | 344.5   |
| ENSGALT0000 potassium voltage-gated channel, ε     | KCND2   | 0.859036 | 130     |
| ENSGALT0000 potassium voltage-gated channel, ε     | KCND3   | 0.784985 | 54      |
| ENSGALT0000 potassium voltage-gated channel, I     | KCNE1   | 0.562993 | 1.5     |
| ENSGALT0000 potassium voltage-gated channel, I     | KCNE2   | 0.783116 | 3.5     |
| ENSGALT0000 potassium voltage-gated channel, I     | KCNE4   | 0.956509 | 9       |
| ENSGALT0000 potassium voltage-gated channel, ε     | KCNF1   | 0.54451  | 185     |

|             |                                                   |          |         |
|-------------|---------------------------------------------------|----------|---------|
| ENSGALT0000 | potassium voltage-gated channel, $\epsilon$ KCNG1 | 0.559174 | 62.5    |
| ENSGALT0000 | potassium voltage-gated channel, $\epsilon$ KCNG2 | 0.932273 | 700.5   |
| ENSGALT0000 | potassium voltage-gated channel, $\epsilon$ KCNG3 | 0.972208 | 44      |
| ENSGALT0000 | potassium voltage-gated channel, $\epsilon$ KCNG4 | 0.774948 | 4.5     |
| ENSGALT0000 | potassium voltage-gated channel, $\epsilon$ KCNH1 | 0.68088  | 8.5     |
| ENSGALT0000 | potassium voltage-gated channel, $\epsilon$ KCNH4 | 0.811274 | 93      |
| ENSGALT0000 | potassium voltage-gated channel, $\epsilon$ KCNH5 | 0.967876 | 293     |
| ENSGALT0000 | potassium voltage-gated channel, $\epsilon$ KCNH6 | 0.958944 | 194     |
| ENSGALT0000 | potassium voltage-gated channel, $\epsilon$ KCNH7 | 0.760529 | 149.5   |
| ENSGALT0000 | potassium voltage-gated channel, $\epsilon$ KCNH8 | 1        | 0.5     |
| ENSGALT0000 | Kv channel interacting protein 1 KCNIP1           | 0.81854  | 15.5    |
| ENSGALT0000 | Kv channel interacting protein 2 KCNIP2           | 0.5933   | 110     |
| ENSGALT0000 | Kv channel interacting protein 4 KCNIP4           | 0.944629 | 332.146 |
| ENSGALT0000 | potassium inwardly-rectifying chan KCNJ1          | 0.562993 | 0       |
| ENSGALT0000 | potassium inwardly-rectifying chan KCNJ12         | 0.938058 | 87.5    |
| ENSGALT0000 | potassium inwardly-rectifying chan KCNJ16         | 0.845269 | 158     |
| ENSGALT0000 | potassium inwardly-rectifying chan KCNJ2          | 0.632812 | 97      |
| ENSGALT0000 | potassium inwardly-rectifying chan KCNJ3          | 0.846132 | 98.5    |
| ENSGALT0000 | potassium inwardly-rectifying chan KCNJ6          | 0.745781 | 10.5    |
| ENSGALT0000 | potassium channel, subfamily K, m KCNK1           | 0.979646 | 344.5   |
| ENSGALT0000 | potassium channel, subfamily K, m KCNK10          | 0.565652 | 65.5    |
| ENSGALT0000 | potassium channel, subfamily K, m KCNK13          | 0.315562 | 1       |
| ENSGALT0000 | potassium channel, subfamily K, m KCNK17          | 0.417139 | 0.5     |
| ENSGALT0000 | potassium channel, subfamily K, m KCNK2           | 0.698067 | 78.5    |
| ENSGALT0000 | potassium channel, subfamily K, m KCNK5           | 0.699591 | 225.5   |
| ENSGALT0000 | potassium channel, subfamily K, m KCNK9           | 0.822007 | 32      |
| ENSGALT0000 | potassium large conductance calci KCNMA1          | 0.824267 | 166.5   |
| ENSGALT0000 | potassium large conductance calci KCNMB1          | 0.898356 | 1       |
| ENSGALT0000 | potassium large conductance calci KCNMB2          | 0.834967 | 8.5     |
| ENSGALT0000 | potassium large conductance calci KCNMB4          | 0.445061 | 1117.5  |
| ENSGALT0000 | potassium intermediate/small cond KCNN2           | 0.780093 | 59.5    |
| ENSGALT0000 | potassium voltage-gated channel, $\delta$ KCNQ1   | 0.996084 | 201.5   |
| ENSGALT0000 | potassium voltage-gated channel, $\delta$ KCNQ2   | 0.880544 | 431.998 |
| ENSGALT0000 | potassium voltage-gated channel, $\delta$ KCNQ3   | 0.987764 | 507     |
| ENSGALT0000 | potassium voltage-gated channel, $\delta$ KCNQ4   | 0.729205 | 58      |
| ENSGALT0000 | potassium voltage-gated channel, $\delta$ KCNQ5   | 0.632056 | 17      |
| ENSGALT0000 | potassium channel regulator KCNRG                 | 0.898507 | 73.5    |
| ENSGALT0000 | potassium voltage-gated channel, $\zeta$ KCNS1    | 0.857782 | 143     |
| ENSGALT0000 | potassium voltage-gated channel, $\zeta$ KCNS2    | 0.62984  | 72.5    |
| ENSGALT0000 | potassium voltage-gated channel, $\zeta$ KCNS3    | 0.974602 | 8.5     |
| ENSGALT0000 | potassium channel, subfamily T, m KCNT1           | 0.807154 | 152     |
| ENSGALT0000 | potassium channel, subfamily T, m KCNT2           | 0.875893 | 383.5   |
| ENSGALT0000 | potassium channel, subfamily U, m KGNU1           | 0.550476 | 9.5     |
| ENSGALT0000 | potassium channel, subfamily V, m KCNV1           | 0.720845 | 10.1431 |
| ENSGALT0000 | potassium channel, subfamily V, m KCNV2           | 0.464758 | 0.5     |
| ENSGALT0000 | potassium channel tetramerisation KCTD1           | 0.801571 | 572.5   |
| ENSGALT0000 | potassium channel tetramerisation KCTD10          | 0.890631 | 1194    |
| ENSGALT0000 | potassium channel tetramerisation KCTD12          | 0.927615 | 153     |
| ENSGALT0000 | potassium channel tetramerisation KCTD14          | 0.615529 | 27.5    |
| ENSGALT0000 | potassium channel tetramerisation KCTD15          | 0.978294 | 397     |
| ENSGALT0000 | potassium channel tetramerisation KCTD16          | 0.847806 | 77      |
| ENSGALT0000 | potassium channel tetramerisation KCTD17          | 0.864233 | 203.5   |
| ENSGALT0000 | potassium channel tetramerisation KCTD18          | 0.985214 | 182.5   |
| ENSGALT0000 | potassium channel tetramerisation KCTD19          | 0.994867 | 4       |
| ENSGALT0000 | potassium channel tetramerisation KCTD2           | 0.96302  | 5443.5  |
| ENSGALT0000 | potassium channel tetramerisation KCTD20          | 0.929989 | 931     |



|             |                                            |           |          |         |
|-------------|--------------------------------------------|-----------|----------|---------|
| ENSGALT0000 | potassium channel tetramerisation          | KCTD21    | 0.978968 | 46.5    |
| ENSGALT0000 | potassium channel tetramerisation          | KCTD3     | 0.947349 | 4201    |
| ENSGALT0000 | potassium channel tetramerisation          | KCTD4     | 0.997925 | 8.5     |
| ENSGALT0000 | potassium channel tetramerisation          | KCTD5     | 0.962376 | 1162.5  |
| ENSGALT0000 | potassium channel tetramerisation          | KCTD6     | 0.963524 | 315     |
| ENSGALT0000 | potassium channel tetramerisation          | KCTD7     | 0.817779 | 388     |
| ENSGALT0000 | potassium channel tetramerisation          | KCTD8     | 0.643945 | 96.955  |
| ENSGALT0000 | potassium channel tetramerisation          | KCTD9     | 0.997599 | 1110    |
| ENSGALT0000 | KDEL (Lys-Asp-Glu-Leu) containing          | KDEL1     | 0.994919 | 1871.5  |
| ENSGALT0000 | KDEL (Lys-Asp-Glu-Leu) containing          | KDEL2     | 0.946805 | 628.5   |
| ENSGALT0000 | KDEL (Lys-Asp-Glu-Leu) endoplasmic         | KDEL2     | 0.981356 | 6737.5  |
| ENSGALT0000 | KDEL (Lys-Asp-Glu-Leu) endoplasmic         | KDEL3     | 0.965612 | 766     |
| ENSGALT0000 | lysine (K)-specific demethylase 1A         | KDM1A     | 0.946818 | 8269    |
| ENSGALT0000 | lysine (K)-specific demethylase 1B         | KDM1B     | 0.967266 | 132     |
| ENSGALT0000 | lysine (K)-specific demethylase 2A         | KDM2A     | 0.976487 | 2637.5  |
| ENSGALT0000 | lysine (K)-specific demethylase 2B         | KDM2B     | 0.980622 | 2644    |
| ENSGALT0000 | lysine (K)-specific demethylase 3A         | KDM3A     | 0.997758 | 5156.09 |
| ENSGALT0000 | lysine (K)-specific demethylase 3B         | KDM3B     | 0.977519 | 3564.5  |
| ENSGALT0000 | lysine (K)-specific demethylase 4A         | KDM4A     | 0.964442 | 3304.5  |
| ENSGALT0000 | lysine (K)-specific demethylase 4B         | KDM4B     | 0.999897 | 3111.02 |
| ENSGALT0000 | lysine (K)-specific demethylase 4C         | KDM4C     | 0.984761 | 166.5   |
| ENSGALT0000 | lysine (K)-specific demethylase 5A         | KDM5A     | 0.978693 | 4708.5  |
| ENSGALT0000 | lysine (K)-specific demethylase 5B         | KDM5B     | 0.993931 | 14303.4 |
| ENSGALT0000 | lysine (K)-specific demethylase 6A         | KDM6A     | 0.994623 | 2600.98 |
| ENSGALT0000 | kinase insert domain receptor (a tyrosine) | KDR       | 0.84057  | 324.5   |
| ENSGALT0000 | 3-ketodihydrosphingosine reductase         | KDSR      | 0.984646 | 778     |
| ENSGALT0000 | Kell blood group, metallo-endopeptidase    | KEL       | 0.49347  | 4.5     |
| ENSGALT0000 | keratocan                                  | KERA      | 0.94692  | 807.5   |
| ENSGALT0000 | KH domain containing, RNA binding          | KHDRBS1   | 0.930527 | 3624.94 |
| ENSGALT0000 | KH domain containing, RNA binding          | KHDRBS2   | 0.830907 | 442     |
| ENSGALT0000 | KH domain containing, RNA binding          | KHDRBS3   | 0.615451 | 1333.5  |
| ENSGALT0000 | KIAA0020                                   | KIAA0020  | 0.943366 | 934.012 |
| ENSGALT0000 | KIAA0090                                   | KIAA0090  | 0.961516 | 5937    |
| ENSGALT0000 | KIAA0100                                   | KIAA0100  | 0.958474 | 3749.5  |
| ENSGALT0000 | KIAA0146                                   | KIAA0146  | 0.964613 | 169.5   |
| ENSGALT0000 | KIAA0174                                   | KIAA0174  | 0.910153 | 2441.72 |
| ENSGALT0000 | KIAA0182                                   | KIAA0182  | 0.872557 | 931.135 |
| ENSGALT0000 | KIAA0195                                   | KIAA0195  | 0.990768 | 2173    |
| ENSGALT0000 | KIAA0196                                   | KIAA0196  | 0.945328 | 1485    |
| ENSGALT0000 | KIAA0226                                   | KIAA0226  | 0.862647 | 463.58  |
| ENSGALT0000 | KIAA0226-like                              | KIAA0226L | 0.981828 | 106     |
| ENSGALT0000 | KIAA0232                                   | KIAA0232  | 0.984363 | 1544.5  |
| ENSGALT0000 | KIAA0240                                   | KIAA0240  | 0.995497 | 511     |
| ENSGALT0000 | KIAA0247                                   | KIAA0247  | 0.882561 | 959.5   |
| ENSGALT0000 | KIAA0284                                   | KIAA0284  | 0.996745 | 3220    |
| ENSGALT0000 | KIAA0317                                   | KIAA0317  | 0.966593 | 1313    |
| ENSGALT0000 | KIAA0319                                   | KIAA0319  | 0.917844 | 493     |
| ENSGALT0000 | KIAA0319-like                              | KIAA0319L | 0.97862  | 2725.93 |
| ENSGALT0000 | KIAA0355                                   | KIAA0355  | 0.969828 | 855.744 |
| ENSGALT0000 | KIAA0368                                   | KIAA0368  | 0.935569 | 1978.5  |
| ENSGALT0000 | KIAA0391                                   | KIAA0391  | 0.97474  | 378.5   |
| ENSGALT0000 | KIAA0408                                   | KIAA0408  | 0.83433  | 609.5   |
| ENSGALT0000 | KIAA0415                                   | KIAA0415  | 0.918128 | 1754.5  |
| ENSGALT0000 | KIAA0430                                   | KIAA0430  | 0.967672 | 1722.5  |
| ENSGALT0000 | KIAA0494                                   | KIAA0494  | 0.955083 | 444.934 |
| ENSGALT0000 | KIAA0528                                   | KIAA0528  | 0.998058 | 1378.47 |

|                                            |           |          |         |
|--------------------------------------------|-----------|----------|---------|
| ENSGALT0000 KIAA0564                       | KIAA0564  | 0.975939 | 576.5   |
| ENSGALT0000 KIAA0586                       | KIAA0586  | 0.997568 | 1513.49 |
| ENSGALT0000 KIAA0664                       | KIAA0664  | 0.934823 | 1461.5  |
| ENSGALT0000 KIAA0753                       | KIAA0753  | 0.996332 | 511     |
| ENSGALT0000 KIAA0776                       | KIAA0776  | 0.985913 | 1105.5  |
| ENSGALT0000 KIAA0825                       | KIAA0825  | 0.982758 | 328     |
| ENSGALT0000 KIAA0889                       | KIAA0889  | 0.911498 | 3281    |
| ENSGALT0000 KIAA0895                       | KIAA0895  | 0.888206 | 669     |
| ENSGALT0000 KIAA0895-like                  | KIAA0895L | 0.606335 | 328     |
| ENSGALT0000 KIAA0907                       | KIAA0907  | 0.957566 | 1711.5  |
| ENSGALT0000 KIAA0922                       | KIAA0922  | 0.975437 | 1694    |
| ENSGALT0000 KIAA0930                       | KIAA0930  | 0.923938 | 677.5   |
| ENSGALT0000 KIAA1009                       | KIAA1009  | 0.995524 | 389     |
| ENSGALT0000 KIAA1024                       | KIAA1024  | 0.713491 | 433     |
| ENSGALT0000 KIAA1033                       | KIAA1033  | 0.967682 | 945     |
| ENSGALT0000 KIAA1045                       | KIAA1045  | 0.57316  | 15      |
| ENSGALT0000 KIAA1107                       | KIAA1107  | 0.795608 | 545.5   |
| ENSGALT0000 KIAA1109                       | KIAA1109  | 0.966548 | 3106.5  |
| ENSGALT0000 KIAA1143                       | KIAA1143  | 0.980128 | 808     |
| ENSGALT0000 KIAA1147                       | KIAA1147  | 0.973149 | 265     |
| ENSGALT0000 KIAA1161                       | KIAA1161  | 0.836209 | 234.119 |
| ENSGALT0000 KIAA1191                       | KIAA1191  | 0.868154 | 1391.5  |
| ENSGALT0000 KIAA1199                       | KIAA1199  | 0.776156 | 341.5   |
| ENSGALT0000 KIAA1211                       | KIAA1211  | 0.856382 | 750.5   |
| ENSGALT0000 KIAA1217                       | KIAA1217  | 0.965539 | 4154.5  |
| ENSGALT0000 KIAA1244                       | KIAA1244  | 0.999908 | 1373    |
| ENSGALT0000 KIAA1267                       | KIAA1267  | 0.953273 | 2398    |
| ENSGALT0000 KIAA1274                       | KIAA1274  | 0.807243 | 7403.53 |
| ENSGALT0000 KIAA1279                       | KIAA1279  | 0.875895 | 1726    |
| ENSGALT0000 KIAA1324-like                  | KIAA1324L | 0.966996 | 463.5   |
| ENSGALT0000 KIAA1328                       | KIAA1328  | 0.962109 | 177     |
| ENSGALT0000 hypothetical protein LOC415416 | KIAA1370  | 0.995263 | 2718.5  |
| ENSGALT0000 KIAA1377                       | KIAA1377  | 0.941757 | 7       |
| ENSGALT0000 KIAA1383                       | KIAA1383  | 0.971933 | 196.5   |
| ENSGALT0000 KIAA1407                       | KIAA1407  | 0.947852 | 254     |
| ENSGALT0000 KIAA1409                       | KIAA1409  | 0.996584 | 1328.5  |
| ENSGALT0000 KIAA1429                       | KIAA1429  | 0.972206 | 1934.5  |
| ENSGALT0000 KIAA1430                       | KIAA1430  | 0.967186 | 171.5   |
| ENSGALT0000 KIAA1432                       | KIAA1432  | 0.982    | 915.5   |
| ENSGALT0000 KIAA1456                       | KIAA1456  | 0.96504  | 17      |
| ENSGALT0000 KIAA1462                       | KIAA1462  | 0.979924 | 1135.5  |
| ENSGALT0000 KIAA1467                       | KIAA1467  | 0.961498 | 1485    |
| ENSGALT0000 KIAA1468                       | KIAA1468  | 0.956759 | 949.5   |
| ENSGALT0000 KIAA1486                       | KIAA1486  | 0.758904 | 54      |
| ENSGALT0000 KIAA1522                       | KIAA1522  | 0.774172 | 1523    |
| ENSGALT0000 KIAA1524                       | KIAA1524  | 0.915389 | 735.5   |
| ENSGALT0000 KIAA1549                       | KIAA1549  | 0.942725 | 4924.5  |
| ENSGALT0000 KIAA1598                       | KIAA1598  | 0.925449 | 437     |
| ENSGALT0000 KIAA1609                       | KIAA1609  | 0.875059 | 657.498 |
| ENSGALT0000 KIAA1614                       | KIAA1614  | 0.97604  | 233     |
| ENSGALT0000 KIAA1644                       | KIAA1644  | 0.903509 | 36.5    |
| ENSGALT0000 KIAA1704                       | KIAA1704  | 0.954687 | 631.5   |
| ENSGALT0000 KIAA1715                       | KIAA1715  | 0.923891 | 677     |
| ENSGALT0000 KIAA1731                       | KIAA1731  | 0.986609 | 580.5   |
| ENSGALT0000 KIAA1737                       | KIAA1737  | 0.960925 | 337     |
| ENSGALT0000 KIAA1755 ortholog              | KIAA1755  | 0.497431 | 102     |

|                                                            |             |          |         |
|------------------------------------------------------------|-------------|----------|---------|
| ENSGALT0000 KIAA1797                                       | KIAA1797    | 0.990033 | 1964    |
| ENSGALT0000 KIAA1826                                       | KIAA1826    | 0.857039 | 426.5   |
| ENSGALT0000 KIAA1841                                       | KIAA1841    | 0.951716 | 390.5   |
| ENSGALT0000 KIAA1919                                       | KIAA1919    | 0.982937 | 359     |
| ENSGALT0000 KIAA1958                                       | KIAA1958    | 0.989019 | 227.5   |
| ENSGALT0000 KIAA2013                                       | KIAA2013    | 0.971082 | 1394.48 |
| ENSGALT0000 KIAA2018                                       | KIAA2018    | 0.995288 | 929.5   |
| ENSGALT0000 KIAA2022                                       | KIAA2022    | 0.958423 | 928.5   |
| ENSGALT0000 kinase D-interacting substrate, 220            | KIDINS220   | 0.941379 | 7688.99 |
| ENSGALT0000 kinesin family member 11                       | KIF11       | 0.927103 | 1670.5  |
| ENSGALT0000 kinesin family member 13A                      | KIF13A      | 0.976382 | 861.004 |
| ENSGALT0000 kinesin family member 14                       | KIF14       | 0.93846  | 88.5    |
| ENSGALT0000 kinesin family member 15                       | KIF15       | 0.951099 | 1620    |
| ENSGALT0000 kinesin family member 16B                      | KIF16B      | 0.982287 | 923.5   |
| ENSGALT0000 kinesin family member 18A                      | KIF18A      | 0.972385 | 409     |
| ENSGALT0000 kinesin family member 18B                      | KIF18B      | 0.909499 | 784     |
| ENSGALT0000 kinesin family member 1A                       | KIF1A       | 0.806684 | 15779   |
| ENSGALT0000 kinesin family member 1B                       | KIF1B       | 0.939811 | 4687    |
| ENSGALT0000 kinesin family member 20A                      | KIF20A      | 0.90877  | 2148.72 |
| ENSGALT0000 kinesin family member 21A                      | KIF21A      | 0.982899 | 3943.51 |
| ENSGALT0000 kinesin family member 21B                      | KIF21B      | 0.947779 | 2069.01 |
| ENSGALT0000 kinesin family member 23                       | KIF23       | 0.916898 | 1400.98 |
| ENSGALT0000 kinesin family member 24                       | KIF24       | 0.975124 | 332.5   |
| ENSGALT0000 kinesin heavy chain member 2A                  | KIF2A       | 0.962037 | 3464    |
| ENSGALT0000 kinesin family member 2B                       | KIF2B       | 0.464758 | 0       |
| ENSGALT0000 kinesin family member 2C                       | KIF2C       | 0.901686 | 1058    |
| ENSGALT0000 kinesin family member 3A                       | KIF3A       | 0.867285 | 1879.49 |
| ENSGALT0000 kinesin family member 3B                       | KIF3B       | 0.960721 | 2113.5  |
| ENSGALT0000 kinesin family member 4A                       | KIF4A       | 0.910304 | 4025.5  |
| ENSGALT0000 kinesin family member 5B                       | KIF5B       | 0.931153 | 2915.5  |
| ENSGALT0000 kinesin family member 5C                       | KIF5C       | 0.719832 | 2518.95 |
| ENSGALT0000 kinesin family member 7                        | KIF7        | 0.946331 | 2547    |
| ENSGALT0000 kinesin family member 9                        | KIF9        | 0.851225 | 288     |
| ENSGALT0000 kinesin-associated protein 3                   | KIFAP3      | 0.733763 | 4524.89 |
| ENSGALT0000 kinesin family member C3                       | KIFC3       | 0.984254 | 922     |
| ENSGALT0000 KIN, antigenic determinant of recA             | KIN         | 0.91056  | 268     |
| ENSGALT0000 kin of IRRE like (Drosophila)                  | KIRREL      | 0.969181 | 1994.5  |
| ENSGALT0000 kin of IRRE like 3 (Drosophila)                | KIRREL3     | 0.769024 | 622.815 |
| ENSGALT0000 Protein kish-A                                 | KISHA_CHICK | 0.735997 | 275.5   |
| ENSGALT0000 v-kit Hardy-Zuckerman 4 feline sarcoma antigen | KIT         | 0.93666  | 280     |
| ENSGALT0000 KIT ligand                                     | KITLG       | 0.945571 | 102.5   |
| ENSGALT0000 klotho                                         | KL          | 0.363165 | 0.60296 |
| ENSGALT0000 kinesin light chain 1                          | KLC1        | 0.704148 | 1785.5  |
| ENSGALT0000 kinesin light chain 4                          | KLC4        | 0.810696 | 3914    |
| ENSGALT0000 Kruppel-like factor 1 (erythroid)              | KLF1        | 0.550666 | 36.5    |
| ENSGALT0000 Kruppel-like factor 10                         | KLF10       | 0.884848 | 955.5   |
| ENSGALT0000 Kruppel-like factor 11                         | KLF11       | 0.945348 | 720     |
| ENSGALT0000 Kruppel-like factor 12                         | KLF12       | 0.909542 | 253     |
| ENSGALT0000 Kruppel-like factor 13                         | KLF13       | 0.71958  | 20      |
| ENSGALT0000 Kruppel-like factor 15                         | KLF15       | 0.818246 | 88      |
| ENSGALT0000 Kruppel-like factor 2 (lung)                   | KLF2        | 0.860469 | 174     |
| ENSGALT0000 Kruppel-like factor 3 (basic)                  | KLF3        | 0.968537 | 401.5   |
| ENSGALT0000 Kruppel-like factor 5 (intestinal)             | KLF5        | 0.933119 | 349     |
| ENSGALT0000 Kruppel-like factor 6                          | KLF6        | 0.921719 | 852.5   |
| ENSGALT0000 Kruppel-like factor 7 (ubiquitous)             | KLF7        | 0.766098 | 100     |
| ENSGALT0000 Kruppel-like factor 8                          | KLF8        | 0.846801 | 614.5   |

|                                                       |         |          |         |
|-------------------------------------------------------|---------|----------|---------|
| ENSGALT0000 kelch domain containing 1                 | KLHDC1  | 0.985144 | 1588    |
| ENSGALT0000 kelch domain containing 10                | KLHDC10 | 0.921556 | 647.5   |
| ENSGALT0000 kelch domain containing 2                 | KLHDC2  | 0.936181 | 4209    |
| ENSGALT0000 kelch domain containing 3                 | KLHDC3  | 0.935985 | 1707    |
| ENSGALT0000 kelch domain containing 4                 | KLHDC4  | 0.884242 | 1533    |
| ENSGALT0000 kelch domain containing 5                 | KLHDC5  | 0.984667 | 342.999 |
| ENSGALT0000 kelch domain containing 7A                | KLHDC7A | 0.952362 | 110     |
| ENSGALT0000 kelch domain containing 8A                | KLHDC8A | 0.557553 | 292.5   |
| ENSGALT0000 kelch domain containing 8B                | KLHDC8B | 0.956091 | 105     |
| ENSGALT0000 kelch-like 1 (Drosophila)                 | KLHL1   | 0.905156 | 23      |
| ENSGALT0000 kelch-like 10 (Drosophila)                | KLHL10  | 0.975734 | 65.5    |
| ENSGALT0000 kelch-like 11 (Drosophila)                | KLHL11  | 0.982384 | 1627    |
| ENSGALT0000 kelch-like 12 (Drosophila)                | KLHL12  | 0.942044 | 1134    |
| ENSGALT0000 kelch-like 9 (Drosophila)                 | KLHL13  | 0.917525 | 1737.5  |
| ENSGALT0000 kelch-like 14 (Drosophila)                | KLHL14  | 0.985642 | 1008.5  |
| ENSGALT0000 kelch-like 15 (Drosophila)                | KLHL15  | 0.972584 | 556     |
| ENSGALT0000 kelch-like 17 (Drosophila)                | KLHL17  | 0.940577 | 228.5   |
| ENSGALT0000 kelch-like 18 (Drosophila)                | KLHL18  | 0.949164 | 2235.99 |
| ENSGALT0000 kelch-like 2, Mayven (Drosophila)         | KLHL2   | 0.94793  | 1285    |
| ENSGALT0000 kelch-like 20 (Drosophila)                | KLHL20  | 0.910333 | 1036.49 |
| ENSGALT0000 kelch-like 21 (Drosophila)                | KLHL21  | 0.928864 | 1462    |
| ENSGALT0000 kelch-like 22 (Drosophila)                | KLHL22  | 0.983345 | 507.5   |
| ENSGALT0000 kelch-like 23 (Drosophila)                | KLHL23  | 0.403161 | 26.5    |
| ENSGALT0000 DRE1 protein                              | KLHL24  | 0.958197 | 1424.48 |
| ENSGALT0000 kelch-like 25 (Drosophila)                | KLHL25  | 0.728087 | 1188    |
| ENSGALT0000 kelch-like 26 (Drosophila)                | KLHL26  | 0.860554 | 253     |
| ENSGALT0000 kelch-like 28 (Drosophila)                | KLHL28  | 0.895745 | 555     |
| ENSGALT0000 kelch-like 29 (Drosophila)                | KLHL29  | 0.916895 | 704.5   |
| ENSGALT0000 kelch-like 3 (Drosophila)                 | KLHL3   | 0.994615 | 974     |
| ENSGALT0000 kelch-like 30 (Drosophila)                | KLHL30  | 0.552343 | 1.5     |
| ENSGALT0000 kelch-like 31 (Drosophila)                | KLHL31  | 0.569094 | 19      |
| ENSGALT0000 kelch-like 32 (Drosophila)                | KLHL32  | 0.917448 | 243     |
| ENSGALT0000 kelch-like 34 (Drosophila)                | KLHL34  | 0.44331  | 3       |
| ENSGALT0000 kelch-like 35 (Drosophila)                | KLHL35  | 0.549829 | 159.031 |
| ENSGALT0000 kelch-like 36 (Drosophila)                | KLHL36  | 0.784331 | 616     |
| ENSGALT0000 kelch-like 38 (Drosophila)                | KLHL38  | 0.773322 | 3.5     |
| ENSGALT0000 kelch-like 4 (Drosophila)                 | KLHL4   | 0.811088 | 109     |
| ENSGALT0000 kelch-like 5 (Drosophila)                 | KLHL5   | 0.822865 | 1046.5  |
| ENSGALT0000 kelch-like 6 (Drosophila)                 | KLHL6   | 0.878011 | 37.5    |
| ENSGALT0000 kelch-like 7 (Drosophila)                 | KLHL7   | 0.879108 | 1404    |
| ENSGALT0000 kelch-like 8 (Drosophila)                 | KLHL8   | 0.984829 | 642     |
| ENSGALT0000 kynurenine 3-monooxygenase (kyn KMO       |         | 0.551385 | 0       |
| ENSGALT0000 kinase non-catalytic C-lobe domain KNDC1  |         | 0.96184  | 986     |
| ENSGALT0000 kininogen 1                               | KNG1    | 0.649519 | 0.5     |
| ENSGALT0000 kinetochore associated 1                  | KNTC1   | 0.964634 | 1112    |
| ENSGALT0000 Importin subunit alpha-1                  | KPNA1   | 0.950916 | 1818.53 |
| ENSGALT0000 karyopherin alpha 2 (RAG cohort 1 KPNA2   |         | 0.85343  | 3366    |
| ENSGALT0000 karyopherin alpha 3 (importin alpha KPNA3 |         | 0.9806   | 1282    |
| ENSGALT0000 karyopherin alpha 4 (importin alpha KPNA4 |         | 0.974796 | 5001.5  |
| ENSGALT0000 karyopherin alpha 5 (importin alpha KPNA5 |         | 0.991864 | 506.5   |
| ENSGALT0000 karyopherin alpha 6 (importin alpha KPNA6 |         | 0.921549 | 1550    |
| ENSGALT0000 karyopherin alpha 7 (importin alpha KPNA7 |         | 0.98481  | 3       |
| ENSGALT0000 karyopherin (importin) beta 1             | KPNB1   | 0.89474  | 8540.5  |
| ENSGALT0000 v-Ki-ras2 Kirsten rat sarcoma viral KRAS  |         | 0.961885 | 257.423 |
| ENSGALT0000 kringle containing transmembrane KREMEN1  |         | 0.999364 | 811.5   |
| ENSGALT0000 KRIT1, ankyrin repeat containing KRIT1    |         | 0.948775 | 788.5   |

|                                                       |             |          |          |
|-------------------------------------------------------|-------------|----------|----------|
| ENSGALT0000 KRR1, small subunit (SSU) proces          | KRR1        | 0.951571 | 779.5    |
| ENSGALT0000 keratin 10                                | KRT10       | 0.756016 | 21       |
| ENSGALT0000 keratin 14                                | KRT14       | 0.718792 | 439.25   |
| ENSGALT0000 keratin 15                                | KRT15       | 0.865633 | 11.2249  |
| ENSGALT0000 keratin 19                                | KRT19       | 0.912004 | 5688.89  |
| ENSGALT0000 keratin 20                                | KRT20       | 0.977456 | 17       |
| ENSGALT0000 keratin 222                               | KRT222      | 0.975607 | 136      |
| ENSGALT0000 keratin 23 (histone deacetylase ind       | KRT23       | 0.816896 | 14.5     |
| ENSGALT0000 type II alpha-keratin IIC                 | KRT75       | 0.784205 | 119.404  |
| ENSGALT0000 keratin 80                                | KRT80       | 0.954744 | 23.9427  |
| ENSGALT0000 keratin associated protein 10-4           | KRTAP10-4   | ?        | 0        |
| ENSGALT0000 keratin associated protein 19-2           | KRTAP19-2   | 0.464758 | 1.98E-09 |
| ENSGALT0000 keratinocyte associated protein 3         | KRTCAP3     | 0.92498  | 282      |
| ENSGALT0000 Ribosomal protein S6 kinase 2 alpr        | KS6AA_CHICK | 0.920223 | 3710.04  |
| ENSGALT0000 kinase suppressor of ras 1                | KSR1        | 0.935681 | 403.498  |
| ENSGALT0000 kinase suppressor of ras 2                | KSR2        | 0.732395 | 95.5     |
| ENSGALT0000 kinectin 1 (kinesin receptor)             | KTN1        | 0.947147 | 3556.31  |
| ENSGALT0000 kyphoscoliosis peptidase                  | KY          | 0.868237 | 16.5     |
| ENSGALT0000 kynureninase                              | KYNU        | 0.341881 | 1.5      |
| ENSGALT0000 L-2-hydroxyglutarate dehydrogenase        | L2HGDH      | 0.965535 | 459.5    |
| ENSGALT0000 I(3)mbt-like 1 (Drosophila)               | L3MBTL1     | 0.989918 | 405.5    |
| ENSGALT0000 I(3)mbt-like 2 (Drosophila)               | L3MBTL2     | 0.957264 | 1678.5   |
| ENSGALT0000 I(3)mbt-like 4 (Drosophila)               | L3MBTL4     | 0.935587 | 142      |
| ENSGALT0000 Ig lambda chain C region                  | LAC_CHICK   | ?        | 0        |
| ENSGALT0000 laccase (multicopper oxidoreductase       | LACC1       | 0.722096 | 1        |
| ENSGALT0000 lactation elevated 1                      | LACE1       | 0.970306 | 141      |
| ENSGALT0000 lactamase, beta                           | LACTB       | 0.957501 | 428.5    |
| ENSGALT0000 lactamase, beta 2                         | LACTB2      | 0.888019 | 415.598  |
| ENSGALT0000 ladinin 1                                 | LAD1        | 0.184135 | 24.5148  |
| ENSGALT0000 lymphocyte-activation gene 3              | LAG3        | 0.853815 | 0.5      |
| ENSGALT0000 laminin, alpha 1                          | LAMA1       | 0.926928 | 3497.51  |
| ENSGALT0000 laminin, alpha 2                          | LAMA2       | 0.674092 | 191      |
| ENSGALT0000 laminin, alpha 3                          | LAMA3       | 0.943182 | 92.5     |
| ENSGALT0000 laminin, alpha 4                          | LAMA4       | 0.71865  | 833.5    |
| ENSGALT0000 laminin, alpha 5                          | LAMA5       | 0.998082 | 10755.5  |
| ENSGALT0000 laminin, beta 1                           | LAMB1       | 0.943751 | 18983.3  |
| ENSGALT0000 laminin, beta 2 (laminin S)               | LAMB2       | 0.979525 | 2324.51  |
| ENSGALT0000 laminin, beta 3                           | LAMB3       | 0.970831 | 55       |
| ENSGALT0000 laminin, beta 4                           | LAMB4       | 0.613548 | 37       |
| ENSGALT0000 laminin, gamma 1 (formerly LAMB2          | LAMC1       | 0.935826 | 15469.9  |
| ENSGALT0000 laminin, gamma 2                          | LAMC2       | 0.736124 | 26.0041  |
| ENSGALT0000 laminin, gamma 3                          | LAMC3       | 0.909755 | 475.5    |
| ENSGALT0000 lysosomal-associated membrane p           | LAMP1       | 0.962062 | 4723.46  |
| ENSGALT0000 lysosomal-associated membrane p           | LAMP2       | 0.849443 | 1446.5   |
| ENSGALT0000 lysosomal-associated membrane p           | LAMP3       | 0.756413 | 6        |
| ENSGALT0000 late endosomal/lysosomal adaptor, LAMTOR2 | LAMTOR2     | 0.458379 | 1293.5   |
| ENSGALT0000 late endosomal/lysosomal adaptor, LAMTOR3 | LAMTOR3     | 0.906758 | 2285.5   |
| ENSGALT0000 LanC lantibiotic synthetase compor        | LANCL1      | 0.899531 | 2581     |
| ENSGALT0000 LanC lantibiotic synthetase compor        | LANCL2      | 0.892711 | 1017     |
| ENSGALT0000 LanC lantibiotic synthetase compor        | LANCL3      | 0.916551 | 59.5     |
| ENSGALT0000 leucine aminopeptidase 3                  | LAP3        | 0.80017  | 1265     |
| ENSGALT0000 lysosomal protein transmembrane           | LAPTM4A     | 0.963083 | 6539.1   |
| ENSGALT0000 lysosomal protein transmembrane           | LAPTM4B     | 0.810401 | 43       |
| ENSGALT0000 lysosomal protein transmembrane           | LAPTM5      | 0.658802 | 97.5     |
| ENSGALT0000 like-glycosyltransferase                  | LARGE       | 0.950388 | 1221.5   |
| ENSGALT0000 La ribonucleoprotein domain family        | LARP1       | 0.94994  | 4033     |

|                                                                          |          |          |         |
|--------------------------------------------------------------------------|----------|----------|---------|
| ENSGALT0000 La ribonucleoprotein domain family LARP1B                    |          | 0.981227 | 463     |
| ENSGALT0000 La ribonucleoprotein domain family LARP4                     |          | 0.962658 | 3259    |
| ENSGALT0000 La ribonucleoprotein domain family LARP4B                    |          | 0.977607 | 682     |
| ENSGALT0000 La ribonucleoprotein domain family LARP6                     |          | 0.967158 | 146     |
| ENSGALT0000 La ribonucleoprotein domain family LARP7                     |          | 0.894886 | 703.999 |
| ENSGALT0000 leucyl-tRNA synthetase                                       | LARS     | 0.920556 | 2840.5  |
| ENSGALT0000 leucyl-tRNA synthetase 2, mitochondrion                      | LARS2    | 0.945553 | 751.5   |
| ENSGALT0000 LAS1-like (S. cerevisiae)                                    | LAS1L    | 0.975162 | 2111.51 |
| ENSGALT0000 LIM and SH3 protein 1                                        | LASP1    | 0.791632 | 4295.5  |
| ENSGALT0000 ceramide synthase 4                                          | LASS4    | 0.994497 | 1208.5  |
| ENSGALT0000 linker for activation of T cells family                      | LAT2     | 0.82207  | 3       |
| ENSGALT0000 LATS, large tumor suppressor, homolog 1                      | LATS1    | 0.9822   | 1453    |
| ENSGALT0000 LATS, large tumor suppressor, homolog 2                      | LATS2    | 0.960364 | 351.816 |
| ENSGALT0000 liver basic fatty acid binding protein                       | LBFABP   | 0.904992 | 2.5     |
| ENSGALT0000 limb bud and heart development homeobox                      | LBH      | 0.98073  | 2349    |
| ENSGALT0000 lamin B receptor                                             | LBR      | 0.941661 | 2702.49 |
| ENSGALT0000 Leber congenital amaurosis 5                                 | LCA5     | 0.997685 | 188     |
| ENSGALT0000 Leber congenital amaurosis 5-like                            | LCA5L    | 0.990924 | 91.5    |
| ENSGALT0000 lysocardiolipin acyltransferase 1                            | LCLAT1   | 0.958176 | 2396.5  |
| ENSGALT0000 leucine carboxyl methyltransferase                           | LCMT1    | 0.763603 | 559.5   |
| ENSGALT0000 leucine carboxyl methyltransferase                           | LCMT2    | 0.93099  | 1499.5  |
| ENSGALT0000 lipocalin 15                                                 | LCN15    | 0.753279 | 7.5     |
| ENSGALT0000 ligand dependent nuclear receptor                            | LCOR     | 0.973531 | 399     |
| ENSGALT0000 ligand dependent nuclear receptor                            | LCORL    | 0.974763 | 331.5   |
| ENSGALT0000 lymphocyte cytosolic protein 1 (L-platelet)                  | LCP1     | 0.759064 | 237.5   |
| ENSGALT0000 lymphocyte cytosolic protein 2 (SH-2 domain)                 | LCP2     | 0.886629 | 7.5     |
| ENSGALT0000 lactase                                                      | LCT      | 0.973593 | 69.5    |
| ENSGALT0000 LIM domain binding 1                                         | LDB1     | 0.851903 | 2512.04 |
| ENSGALT0000 LIM domain binding 2                                         | LDB2     | 0.864206 | 443     |
| ENSGALT0000 LIM domain binding 3                                         | LDB3     | 0.652678 | 73.5    |
| ENSGALT0000 lactate dehydrogenase A                                      | LDHA     | 0.451112 | 8425.98 |
| ENSGALT0000 lactate dehydrogenase B                                      | LDHB     | 0.628691 | 20699   |
| ENSGALT0000 lactate dehydrogenase D                                      | LDHD     | 0.968734 | 495.5   |
| ENSGALT0000 low density lipoprotein receptor class B type 1              | LDLRAD1  | 0.753326 | 24.5    |
| ENSGALT0000 low density lipoprotein receptor class B type 3              | LDLRAD3  | 0.972203 | 1064.51 |
| ENSGALT0000 low density lipoprotein receptor adaptor protein 1           | LDLRAP1  | 0.999424 | 778     |
| ENSGALT0000 liver expressed antimicrobial peptidase                      | LEAP2    | 0.562993 | 0.5     |
| ENSGALT0000 leukocyte cell derived chemotaxin 1                          | LECT1    | 0.957801 | 1577.5  |
| ENSGALT0000 leukocyte cell-derived chemotaxin 2                          | LECT2    | 0.160596 | 1.5     |
| ENSGALT0000 lymphoid enhancer-binding factor 1                           | LEF1     | 0.8323   | 1176.5  |
| ENSGALT0000 left-right determination factor 2                            | LEFTY2   | 0.547885 | 2.5     |
| ENSGALT0000 leucine, glutamate and lysine rich protein 1                 | LEKR1    | 0.939174 | 48      |
| ENSGALT0000 LEM domain containing 2                                      | LEMD2    | 0.956142 | 1316.5  |
| ENSGALT0000 LEM domain containing 3                                      | LEMD3    | 0.991753 | 737.006 |
| ENSGALT0000 Leo1, Paf1/RNA polymerase II core                            | LEO1     | 0.897937 | 993.5   |
| ENSGALT0000 leptin receptor                                              | LEPR     | 0.910564 | 53.5    |
| ENSGALT0000 leucine proline-enriched proteoglycan                        | LEPRE1   | 0.984622 | 3442.98 |
| ENSGALT0000 leprecan-like 1                                              | LEPREL1  | 0.823364 | 817.5   |
| ENSGALT0000 leprecan-like 2                                              | LEPREL2  | 0.99624  | 1563.49 |
| ENSGALT0000 leptin receptor overlapping transcript                       | LEPROT   | 0.975484 | 3392    |
| ENSGALT0000 leptin receptor overlapping transcript                       | LEPROTL1 | 0.937769 | 1150.5  |
| ENSGALT0000 leucine zipper-EF-hand containing protein 1                  | LETM1    | 0.918389 | 717.5   |
| ENSGALT0000 leucine zipper-EF-hand containing protein 2                  | LETM2    | 0.955107 | 470     |
| ENSGALT0000 LFNG O-fucosylpeptide 3-beta-N-acetylglucosaminyltransferase | LFNG     | 0.939095 | 2378.5  |
| ENSGALT0000 lectin, galactoside-binding, soluble, family 1 member 1      | LGALS1   | 0.649359 | 16      |
| ENSGALT0000 lectin, galactoside-binding, soluble, family 2 member 2      | LGALS2   | 0.903603 | 7.5     |

|                                                          |        |          |         |
|----------------------------------------------------------|--------|----------|---------|
| ENSGALT0000 lectin, galactoside-binding, soluble, LGALS3 |        | 0.929509 | 211.158 |
| ENSGALT0000 lectin, galactoside-binding, soluble, LGALS8 |        | 0.88484  | 584.501 |
| ENSGALT0000 lectin, galactoside-binding-like LGALS       | LGALS  | 0.905708 | 1484.5  |
| ENSGALT0000 leucine-rich, glioma inactivated 1           | LGI1   | 0.963519 | 178.5   |
| ENSGALT0000 leucine-rich repeat LGI family, mem          | LGI2   | 0.884483 | 403.998 |
| ENSGALT0000 legumain                                     | LGMN   | 0.861878 | 2507    |
| ENSGALT0000 leucine-rich repeat containing G pr          | LGR4   | 0.994128 | 1606.5  |
| ENSGALT0000 leucine-rich repeat containing G pr          | LGR5   | 0.786618 | 3157    |
| ENSGALT0000 leucine-rich repeat containing G pr          | LGR6   | 0.981307 | 171.5   |
| ENSGALT0000 lengsin, lens protein with glutamine         | LGSN   | ?        | 0       |
| ENSGALT0000 ligatin                                      | LGTN   | 0.850484 | 1841.5  |
| ENSGALT0000 luteinizing hormone/choriogonadotri          | LHCGR  | 0.839792 | 32      |
| ENSGALT0000 lipoma HMGIC fusion partner                  | LHFP   | 0.940113 | 521.5   |
| ENSGALT0000 lipoma HMGIC fusion partner-like 2           | LHFPL2 | 0.74135  | 129     |
| ENSGALT0000 lipoma HMGIC fusion partner-like 3           | LHFPL3 | 0.690194 | 77      |
| ENSGALT0000 lipoma HMGIC fusion partner-like 5           | LHFPL5 | 0.947499 | 661     |
| ENSGALT0000 phospholysine phosphohistidine inc           | LHPP   | 0.721393 | 1102.5  |
| ENSGALT0000 LIM homeobox 1                               | LHX1   | 0.652361 | 11.5    |
| ENSGALT0000 LIM homeobox 3                               | LHX3   | 0.31716  | 42      |
| ENSGALT0000 LIM homeobox 4                               | LHX4   | 0.828826 | 1       |
| ENSGALT0000 LIM homeobox 5                               | LHX5   | 0.621882 | 2.5     |
| ENSGALT0000 LIM homeobox 6                               | LHX6   | 0.973807 | 25.5    |
| ENSGALT0000 LIM homeobox 8                               | LHX8   | 0.687934 | 33.5    |
| ENSGALT0000 LIM homeobox 9                               | LHX9   | 0.683403 | 2       |
| ENSGALT0000 lipoic acid synthetase                       | LIAS   | 0.869472 | 653.3   |
| ENSGALT0000 leukemia inhibitory factor (cholinerg        | LIF    | ?        | 0       |
| ENSGALT0000 leukemia inhibitory factor receptor          | LIFR   | 0.984253 | 2223.5  |
| ENSGALT0000 ligase I, DNA, ATP-dependent                 | LIG1   | 0.821294 | 1971.54 |
| ENSGALT0000 ligase III, DNA, ATP-dependent               | LIG3   | 0.93974  | 2269.5  |
| ENSGALT0000 ligase IV, DNA, ATP-dependent                | LIG4   | 0.973457 | 273     |
| ENSGALT0000 LIM domain and actin binding 1               | LIMA1  | 0.90378  | 1920    |
| ENSGALT0000 LIM and calponin homology domain             | LIMCH1 | 0.873449 | 1085    |
| ENSGALT0000 LIM domains containing 1                     | LIMD1  | 0.993837 | 1795.54 |
| ENSGALT0000 LIM domain containing 2                      | LIMD2  | 0.699179 | 2804.96 |
| ENSGALT0000 LIM domain kinase 1                          | LIMK1  | 0.951794 | 1561.49 |
| ENSGALT0000 LIM domain kinase 2                          | LIMK2  | 0.98505  | 1577    |
| ENSGALT0000 LIM and senescent cell antigen-like          | LIMS1  | 0.974696 | 1840.47 |
| ENSGALT0000 LIM and senescent cell antigen-like          | LIMS2  | 0.914608 | 1078    |
| ENSGALT0000 lin-28 homolog A (C. elegans)                | LIN28A | 0.76755  | 48.5    |
| ENSGALT0000 lin-28 homolog B (C. elegans)                | LIN28B | 0.92665  | 112     |
| ENSGALT0000 lin-52 homolog (C. elegans)                  | LIN52  | 0.788804 | 153     |
| ENSGALT0000 lin-54 homolog (C. elegans)                  | LIN54  | 0.966078 | 399     |
| ENSGALT0000 lin-7 homolog A (C. elegans)                 | LIN7A  | 0.841681 | 117     |
| ENSGALT0000 lin-7 homolog C (C. elegans)                 | LIN7C  | 0.964672 | 1619.5  |
| ENSGALT0000 lin-9 homolog (C. elegans)                   | LIN9   | 0.985628 | 262.5   |
| ENSGALT0000 leucine rich repeat and Ig domain c          | LINGO1 | 0.83839  | 2049.02 |
| ENSGALT0000 leucine rich repeat and Ig domain c          | LINGO2 | 0.985431 | 471     |
| ENSGALT0000 leucine rich repeat and Ig domain c          | LINGO3 | 0.96853  | 192     |
| ENSGALT0000 lines homolog (Drosophila)                   | LINS   | 0.992302 | 118.5   |
| ENSGALT0000 lipase A, lysosomal acid, cholester          | LIPA   | 0.686998 | 142.5   |
| ENSGALT0000 lipase, hepatic                              | LIPC   | 0.464758 | 0       |
| ENSGALT0000 lipase, endothelial                          | LIPG   | 0.836285 | 391     |
| ENSGALT0000 lipase, member H                             | LIPH   | 0.948241 | 186.5   |
| ENSGALT0000 lipase, member I                             | LIPI   | 0.371997 | 0       |
| ENSGALT0000 lipoyltransferase 1                          | LIPT1  | 0.893943 | 321     |
| ENSGALT0000 lipopolysaccharide-induced TNF fa            | LITAF  | 0.891591 | 284     |

|                                                       |           |          |          |
|-------------------------------------------------------|-----------|----------|----------|
| ENSGALT0000 Lix1 homolog (chicken)                    | LIX1      | 0.87701  | 10.5     |
| ENSGALT0000 lung lectin                               | LL        | 0.461677 | 1.5      |
| ENSGALT0000 lethal giant larvae homolog 1 (Dros LLGL1 |           | 0.916039 | 2568.5   |
| ENSGALT0000 lethal giant larvae homolog 2 (Dros LLGL2 |           | 0.997313 | 5997.88  |
| ENSGALT0000 LLP homolog, long-term synaptic fæLLPH    |           | 0.263699 | 744.004  |
| ENSGALT0000 lectin, mannose-binding, 1                | LMAN1     | 0.963311 | 1407.98  |
| ENSGALT0000 limb region 1 homolog (mouse)             | LMBR1     | 0.970235 | 1362.02  |
| ENSGALT0000 LMBR1 domain containing 1                 | LMBRD1    | 0.938797 | 534      |
| ENSGALT0000 LMBR1 domain containing 2                 | LMBRD2    | 0.97501  | 457.502  |
| ENSGALT0000 LIM and cysteine-rich domains 1           | LMCD1     | 0.746512 | 215.5    |
| ENSGALT0000 lipase maturation factor 1                | LMF1      | 0.964854 | 1083.5   |
| ENSGALT0000 Lipase maturation factor 2                | LMF2      | 0.924584 | 1531     |
| ENSGALT0000 leishmanolysin-like (metallopeptida       | LMLN      | 0.965479 | 365      |
| ENSGALT0000 lamin B1                                  | LMNB1     | 0.897394 | 2415.05  |
| ENSGALT0000 lamin B2                                  | LMNB2     | 0.904269 | 4107.49  |
| ENSGALT0000 LIM domain only 1 (rhombotin 1)           | LMO1      | 0.561924 | 1328     |
| ENSGALT0000 LIM domain only 2 (rhombotin-like         | LMO2      | 0.703373 | 314      |
| ENSGALT0000 LIM domain only 3 (rhombotin-like         | LMO3      | 0.880542 | 603.5    |
| ENSGALT0000 LIM domain only 4                         | LMO4      | 0.657791 | 4498     |
| ENSGALT0000 LIM domain 7                              | LMO7      | 0.987599 | 918.999  |
| ENSGALT0000 leiomodulin 2 (cardiac)                   | LMOD2     | 0.268957 | 2.5      |
| ENSGALT0000 leiomodulin 3 (fetal)                     | LMOD3     | 0.892832 | 9        |
| ENSGALT0000 lemur tyrosine kinase 2                   | LMTK2     | 0.971667 | 640.5    |
| ENSGALT0000 LIM homeobox transcription factor         | LMX1B     | 0.951224 | 1951.99  |
| ENSGALT0000 leukemia NUP98 fusion partner 1           | LNP1      | 0.970019 | 15.5     |
| ENSGALT0000 leucyl/cystinyl aminopeptidase            | LNPEP     | 0.986243 | 485.5    |
| ENSGALT0000 ligand of numb-protein X 1                | LN1       | 0.930984 | 47       |
| ENSGALT0000 ligand of numb-protein X 2                | LN2       | 0.947665 | 477      |
| ENSGALT0000 death domain-containing tumor nec         | LOC378902 | 0.945428 | 162.5    |
| ENSGALT0000 keratin                                   | LOC395095 | 0.464758 | 9.35E-11 |
| ENSGALT0000 cryptochrome 4                            | LOC395100 | 0.993166 | 103      |
| ENSGALT0000 Schwann cell-specific EGF-like rep        | LOC395159 | 0.226976 | 304      |
| ENSGALT0000 AQ                                        | LOC395744 | 0.956208 | 1        |
| ENSGALT0000 otokeratin                                | LOC395772 | 0.555766 | 2712.94  |
| ENSGALT0000 smooth muscle protein phosphatas          | LOC395787 | 0.912207 | 3282.71  |
| ENSGALT0000 vitamin D3 hydroxylase associated         | LOC395824 | 0.973962 | 54.4724  |
| ENSGALT0000 lymphotactin                              | LOC395914 | ?        | 0        |
| ENSGALT0000 pepsinogen                                | LOC395926 | 0.649519 | 0        |
| ENSGALT0000 sulfotransferase                          | LOC395933 | 0.539038 | 0.5      |
| ENSGALT0000 L-type calcium channel, alpha 1 su        | LOC395985 | 0.939614 | 15.5     |
| ENSGALT0000 crescent                                  | LOC395991 | 0.999718 | 19       |
| ENSGALT0000 B6.1                                      | LOC396098 | 0.712034 | 12.3388  |
| ENSGALT0000 neuronal acetylcholine receptor su        | LOC396120 | 0.19245  | 1.5      |
| ENSGALT0000 ovostatin                                 | LOC396151 | 0.178396 | 1        |
| ENSGALT0000 mature avidin                             | LOC396260 | 0.885026 | 22.7463  |
| ENSGALT0000 glutathione transferase                   | LOC396380 | 0.781344 | 560.923  |
| ENSGALT0000 purpurin                                  | LOC396454 | 0.82093  | 9        |
| ENSGALT0000 \N                                        | LOC408038 | 0.674908 | 52       |
| ENSGALT0000 cHz-cadherin                              | LOC414835 | 0.926137 | 180      |
| ENSGALT0000 uncharacterized LOC415312                 | LOC415312 | 0.675036 | 3.5      |
| ENSGALT0000 uncharacterized LOC415325                 | LOC415325 | ?        | 0        |
| ENSGALT0000 uncharacterized LOC415345                 | LOC415345 | 0.970187 | 55.9767  |
| ENSGALT0000 unc-13-like                               | LOC415414 | 0.629109 | 2.5      |
| ENSGALT0000 lamin-L(III)-like                         | LOC415464 | 0.909519 | 158.5    |
| ENSGALT0000 ubiquitin-associated protein 1-like       | LOC415529 | 0.983685 | 26.5     |
| ENSGALT0000 uncharacterized oxidoreductase-lik        | LOC415661 | 0.309727 | 5.94976  |



|                                                      |           |            |         |
|------------------------------------------------------|-----------|------------|---------|
| ENSGALT0000 receptor-interacting serine-threonin     | LOC415708 | 0.548476   | 32.5    |
| ENSGALT0000 galanin receptor type 1-like             | LOC415713 | 0.297457   | 19.5    |
| ENSGALT0000 uncharacterized                          | LOC415758 | 0.59814    | 193     |
| ENSGALT0000 uncharacterized                          | LOC415795 | 0.917193   | 373.805 |
| ENSGALT0000 uncharacterized                          | LOC415844 | 0.00285695 | 1.5     |
| ENSGALT0000 5-hydroxyisourate hydrolase              | LOC415859 | 0.418997   | 92.5    |
| ENSGALT0000 uncharacterized                          | LOC415872 | 0.984963   | 5       |
| ENSGALT0000 semaphorin-3D-like                       | LOC415932 | 0.966366   | 903     |
| ENSGALT0000 protein BTG1-like                        | LOC415950 | 0.763232   | 498     |
| ENSGALT0000 cat eye syndrome critical region pr      | LOC415969 | 0.93364    | 220     |
| ENSGALT0000 uncharacterized                          | LOC416053 | 0.654898   | 18      |
| ENSGALT0000 uncharacterized                          | LOC416055 | 0.888752   | 729.5   |
| ENSGALT0000 uncharacterized                          | LOC416082 | 0.328002   | 0       |
| ENSGALT0000 monocarboxylate transporter 2-like       | LOC416086 | 0.832859   | 19.5    |
| ENSGALT0000 uncharacterized                          | LOC416090 | ?          | 0       |
| ENSGALT0000 rho GTPase-activating protein 7-lik      | LOC416169 | 0.809421   | 12      |
| ENSGALT0000 uncharacterized                          | LOC416178 | 0.464758   | 0       |
| ENSGALT0000 uncharacterized                          | LOC416179 | 0.936777   | 11.5    |
| ENSGALT0000 uncharacterized                          | LOC416190 | 0.657043   | 37.5    |
| ENSGALT0000 neuron-specific protein family mem       | LOC416212 | 0.515957   | 288.5   |
| ENSGALT0000 ovoidinhibitor                           | LOC416235 | 0.259935   | 54.5    |
| ENSGALT0000 LON peptidase N-terminal domain          | LOC416263 | 0.884225   | 171     |
| ENSGALT0000 uncharacterized                          | LOC416292 | 0.922633   | 29      |
| ENSGALT0000 C-terminal binding protein-like          | LOC416354 | 0.962317   | 5069.5  |
| ENSGALT0000 testis-expressed sequence 2 protei       | LOC416541 | 0.931843   | 212.5   |
| ENSGALT0000 class II, major histocompatibility co    | LOC416633 | 0.649519   | 1.5     |
| ENSGALT0000 uncharacterized                          | LOC416797 | 0.931631   | 7.5     |
| ENSGALT0000 solute carrier family 2, facilitated gli | LOC416916 | 0.994264   | 440.5   |
| ENSGALT0000 RPE-spondin-like                         | LOC416923 | 0.585248   | 79      |
| ENSGALT0000 vacuolar protein sorting 29 homolog      | LOC416931 | 0.935061   | 13.5    |
| ENSGALT0000 solute carrier family 2, facilitated gli | LOC416935 | 0.976471   | 3       |
| ENSGALT0000 melanotransferrin-like                   | LOC416959 | 0.93568    | 116     |
| ENSGALT0000 signal peptide peptidase-like 3-like     | LOC416968 | 0.969358   | 2062.97 |
| ENSGALT0000 uncharacterized                          | LOC416993 | 0.965941   | 10      |
| ENSGALT0000 putative acyl-CoA dehydrogenase /        | LOC417013 | 0.986079   | 38      |
| ENSGALT0000 uncharacterized                          | LOC417028 | 0.371997   | 0       |
| ENSGALT0000 torsin family 1, member B-like           | LOC417192 | 0.99715    | 14      |
| ENSGALT0000 uncharacterized                          | LOC417263 | 0.8033     | 227     |
| ENSGALT0000 uncharacterized                          | LOC417340 | 0.990725   | 79      |
| ENSGALT0000 uncharacterized                          | LOC417345 | 0.947611   | 15      |
| ENSGALT0000 uncharacterized                          | LOC417380 | 0.988195   | 77.5    |
| ENSGALT0000 angiotensin-related protein 1-like       | LOC417459 | 0.958654   | 28.7521 |
| ENSGALT0000 chemokine ah221                          | LOC417536 | 0.606869   | 20.491  |
| ENSGALT0000 merlin-like                              | LOC417537 | 0.89009    | 513     |
| ENSGALT0000 sucrase-isomaltase, intestinal-like      | LOC417691 | 0.433063   | 5.5239  |
| ENSGALT0000 secreted frizzled-related protein 2-l    | LOC417741 | 0.549507   | 3       |
| ENSGALT0000 prolactin-like protein                   | LOC417800 | 0.779377   | 6       |
| ENSGALT0000 cathepsin E-A-like                       | LOC417848 | 0.649519   | 0.5     |
| ENSGALT0000 solute carrier family 23 member 1-l      | LOC417937 | 0.979988   | 77      |
| ENSGALT0000 histone H1.10                            | LOC417948 | 0.277806   | 88.4392 |
| ENSGALT0000 histone H3.2-like                        | LOC417953 | 0.0715936  | 25.9142 |
| ENSGALT0000 histone H1.01                            | LOC417954 | 0.832544   | 497.632 |
| ENSGALT0000 histone H2A-IV-like                      | LOC417955 | 0.504035   | 117.87  |
| ENSGALT0000 uncharacterized                          | LOC417962 | 0.722096   | 1.5     |
| ENSGALT0000 uncharacterized                          | LOC417973 | 0.734945   | 17.5    |
| ENSGALT0000 family with sequence similarity 20,      | LOC418020 | 0.749025   | 8.5     |

|                                                   |                     |           |         |
|---------------------------------------------------|---------------------|-----------|---------|
| ENSGALT0000 arf-GAP with dual PH domain-cont      | LOC418038           | 0.873215  | 1163.5  |
| ENSGALT0000 poly [ADP-ribose] polymerase 12-li    | LOC418108           | 0.727873  | 37      |
| ENSGALT0000 cystine/glutamate transporter-like    | LOC418109           | 0.583025  | 375.5   |
| ENSGALT0000 uncharacterized                       | LOC418114 LOC418114 | 0.901031  | 15.5    |
| ENSGALT0000 aldo-keto reductase family 1 memb     | LOC418170           | 0.941071  | 1975.33 |
| ENSGALT0000 solute carrier organic anion transpc  | LOC418189           | 0.806085  | 6       |
| ENSGALT0000 uncharacterized                       | LOC418209 LOC418209 | 0.371997  | 1       |
| ENSGALT0000 poly(U)-specific endoribonuclease-    | LOC418221           | 0.779364  | 1.5     |
| ENSGALT0000 heat shock transcription factor, X-li | LOC418222           | 0.580649  | 0       |
| ENSGALT0000 solute carrier family 25 member 33    | LOC418298           | 0.877517  | 229.5   |
| ENSGALT0000 T-cell receptor beta chain V region   | LOC418309           | 0.636311  | 3.5     |
| ENSGALT0000 fatty acid amide hydrolase-like       | LOC418339           | 0.938652  | 1196.5  |
| ENSGALT0000 uncharacterized                       | LOC418416 LOC418416 | ?         | 0       |
| ENSGALT0000 uncharacterized                       | LOC418424 LOC418424 | 0.125     | 0.5     |
| ENSGALT0000 uncharacterized                       | LOC418453 LOC418453 | 0.988601  | 406.831 |
| ENSGALT0000 uncharacterized                       | LOC418465 LOC418465 | 0.464758  | 0       |
| ENSGALT0000 multidrug resistance-associated pro   | LOC418468           | 0.974476  | 266.5   |
| ENSGALT0000 uncharacterized                       | LOC418472 LOC418472 | 0.990546  | 149.5   |
| ENSGALT0000 V-set domain containing T cell activ  | LOC418554           | 0.567285  | 2       |
| ENSGALT0000 histone H2A type 2-B-like             | LOC418707           | ?         | 0       |
| ENSGALT0000 DNA-binding protein RFX8-like         | LOC418713           | 0.746688  | 12.5    |
| ENSGALT0000 uncharacterized                       | LOC418771 LOC418771 | 0.464758  | 0       |
| ENSGALT0000 ES1 protein homolog, mitochondria     | LOC418811           | 0.814644  | 2177.5  |
| ENSGALT0000 mannose receptor, C type 2-like       | LOC418836           | 0.371997  | 6       |
| ENSGALT0000 complement C4-like                    | LOC418892           | 0.892092  | 4       |
| ENSGALT0000 uncharacterized                       | LOC418918 LOC418918 | 0.464758  | 0       |
| ENSGALT0000 RNA polymerase 1-3                    | LOC418927           | 0.665804  | 435.5   |
| ENSGALT0000 F-box/WD repeat-containing protei     | LOC419074           | 0.942728  | 1302    |
| ENSGALT0000 hypothetical protein                  | LOC419104 LOC419104 | 0.972524  | 1337    |
| ENSGALT0000 transmembrane protein 110-like        | LOC419112           | 0.23512   | 251.5   |
| ENSGALT0000 uncharacterized                       | LOC419113 LOC419113 | 0.577584  | 4.5     |
| ENSGALT0000 CMP-N-acetylneuraminate-beta-ga       | LOC419136           | 0.957309  | 236.5   |
| ENSGALT0000 neuritin-like                         | LOC419182           | 0.164317  | 1.5     |
| ENSGALT0000 bactericidal permeability-increasing  | LOC419276           | 0.0072347 | 2       |
| ENSGALT0000 uncharacterized                       | LOC419328 LOC419328 | 0.876995  | 7       |
| ENSGALT0000 uncharacterized                       | LOC419335 LOC419335 | 0.71229   | 726     |
| ENSGALT0000 uncharacterized                       | LOC419389 LOC419389 | 0.97211   | 2704.5  |
| ENSGALT0000 hairy and enhancer of split 5-like    | LOC419390           | 0.708215  | 262.112 |
| ENSGALT0000 uncharacterized                       | LOC419404 LOC419404 | 0.924271  | 1389.5  |
| ENSGALT0000 rho guanine nucleotide exchange f     | LOC419425           | 0.950621  | 41      |
| ENSGALT0000 protein tyrosine phosphatase, non-    | LOC419429           | 0.630117  | 470.5   |
| ENSGALT0000 uncharacterized                       | LOC419602 LOC419602 | 0.191655  | 228     |
| ENSGALT0000 protein FAM49A-like                   | LOC419677           | 0.726052  | 764     |
| ENSGALT0000 transmembrane protein 45B-like        | LOC419726           | 0.609798  | 18      |
| ENSGALT0000 uncharacterized                       | LOC419749 LOC419749 | 0.857787  | 14.5    |
| ENSGALT0000 UPF0722 protein C11orf88-like         | LOC419782           | 0.182233  | 0.5     |
| ENSGALT0000 uncharacterized                       | LOC419830 LOC419830 | 0.47691   | 23.5    |
| ENSGALT0000 Krueppel-like factor 15-like          | LOC419834           | 0.577717  | 34.5    |
| ENSGALT0000 bile acid receptor-like               | LOC419888           | 0.872443  | 4       |
| ENSGALT0000 uncharacterized                       | LOC420093 LOC420093 | 0.464758  | 0       |
| ENSGALT0000 uncharacterized                       | LOC420108 LOC420108 | 0.33545   | 51.5    |
| ENSGALT0000 cathepsin L1-like                     | LOC420160           | 0.683403  | 4.5     |
| ENSGALT0000 uncharacterized                       | LOC420220 LOC420220 | 0.778348  | 3       |
| ENSGALT0000 lymphocyte antigen 6 complex, loc     | LOC420301           | 0.22129   | 0.5     |
| ENSGALT0000 uncharacterized                       | LOC420352 LOC420352 | 0.985038  | 2       |
| ENSGALT0000 uncharacterized                       | LOC420454 LOC420454 | ?         | 0       |

|                                                   |           |          |         |
|---------------------------------------------------|-----------|----------|---------|
| ENSGALT0000 uncharacterized LOC420466             | LOC420466 | 0.749245 | 19      |
| ENSGALT0000 macrophage mannose receptor 1-li      | LOC420516 | 0.988417 | 60      |
| ENSGALT0000 uncharacterized LOC420552             | LOC420552 | 0.95386  | 76.5    |
| ENSGALT0000 1-aminocyclopropane-1-carboxylat      | LOC420553 | 0.712106 | 38.5    |
| ENSGALT0000 probable acyl coa dehydrogenase (     | LOC420562 | 0.993241 | 440.5   |
| ENSGALT0000 multidrug resistance protein 1-like   | LOC420606 | 0.353553 | 2       |
| ENSGALT0000 uncharacterized LOC420609             | LOC420609 | 0.464758 | 0       |
| ENSGALT0000 nucleoporin-like protein 2-like       | LOC420615 | 0.680505 | 10.3927 |
| ENSGALT0000 uncharacterized LOC420726             | LOC420726 | 0.649519 | 1       |
| ENSGALT0000 uncharacterized LOC420734             | LOC420734 | ?        | 0       |
| ENSGALT0000 uncharacterized LOC420770             | LOC420770 | 0.649519 | 0.5     |
| ENSGALT0000 uncharacterized LOC420795             | LOC420795 | 0.705342 | 109     |
| ENSGALT0000 uncharacterized LOC420807             | LOC420807 | 0.963723 | 234     |
| ENSGALT0000 transmembrane protein 14C-like        | LOC420860 | 0.648271 | 1011.5  |
| ENSGALT0000 uncharacterized LOC420864             | LOC420864 | 0.464758 | 0.5     |
| ENSGALT0000 uncharacterized LOC420992             | LOC420992 | 0.938677 | 596.5   |
| ENSGALT0000 uncharacterized LOC421015             | LOC421015 | 0.464758 | 0       |
| ENSGALT0000 transthyretin-like                    | LOC421091 | 0.464758 | 0.5     |
| ENSGALT0000 Ras-related protein Rab-10-like       | LOC421099 | 0.99835  | 332     |
| ENSGALT0000 transmembrane protein 68-like         | LOC421125 | 0.988352 | 24.5    |
| ENSGALT0000 receptor-type tyrosine-protein phos   | LOC421174 | 0.979028 | 1846    |
| ENSGALT0000 transmembrane protein 121-like        | LOC421253 | 0.944061 | 194.5   |
| ENSGALT0000 MACRO domain-containing protein       | LOC421259 | 0.962234 | 417     |
| ENSGALT0000 uncharacterized LOC421285             | LOC421285 | ?        | 0       |
| ENSGALT0000 uncharacterized LOC421394             | LOC421394 | 0.452025 | 2.5     |
| ENSGALT0000 uncharacterized LOC421415             | LOC421415 | 0.98391  | 57      |
| ENSGALT0000 epoxide hydrolase 1-like              | LOC421447 | 0.846862 | 43.5    |
| ENSGALT0000 uncharacterized LOC421512             | LOC421512 | 0.649519 | 0.5     |
| ENSGALT0000 sulfotransferase family, cytosolic, 6 | LOC421560 | 0.464758 | 0.5     |
| ENSGALT0000 UPF0762 protein C6orf58 homolog       | LOC421712 | 0.454233 | 0.5     |
| ENSGALT0000 sulfotransferase family 3A, membe     | LOC421740 | 0.385204 | 3.5     |
| ENSGALT0000 uncharacterized LOC421792             | LOC421792 | 0.864778 | 274.5   |
| ENSGALT0000 uncharacterized LOC421856             | LOC421856 | 0.464758 | 2       |
| ENSGALT0000 zona pellucida glycoprotein-like      | LOC421956 | 0.813533 | 4.5     |
| ENSGALT0000 B(0,+)-type amino acid transporter    | LOC421965 | 0.591845 | 1       |
| ENSGALT0000 WD repeat-containing protein C2or     | LOC421975 | 0.863317 | 1020.5  |
| ENSGALT0000 UPF0638 protein B-like                | LOC421978 | 0.97645  | 66      |
| ENSGALT0000 sterile alpha motif domain-containir  | LOC421996 | 0.874177 | 24      |
| ENSGALT0000 uncharacterized LOC422008             | LOC422008 | 0.464758 | 0       |
| ENSGALT0000 gallin 1                              | LOC422030 | ?        | 0       |
| ENSGALT0000 gallin 2                              | LOC422031 | ?        | 0       |
| ENSGALT0000 cytochrome P450 2K1-like              | LOC422046 | 0.464758 | 0       |
| ENSGALT0000 zinc finger protein 91-like           | LOC422051 | 0.984818 | 343     |
| ENSGALT0000 uncharacterized LOC422071             | LOC422071 | 0.102295 | 439.5   |
| ENSGALT0000 alpha-N-acetylgalactosaminide alpl    | LOC422075 | 0.711955 | 43.5    |
| ENSGALT0000 uncharacterized LOC422090             | LOC422090 | 0.927189 | 326.5   |
| ENSGALT0000 fibronectin type III domain containir | LOC422151 | 0.999527 | 3967.5  |
| ENSGALT0000 PCTP-like protein-like                | LOC422154 | 0.94805  | 36      |
| ENSGALT0000 ferredoxin 1-like                     | LOC422172 | 0.164317 | 1.5     |
| ENSGALT0000 hypothetical protein LOC422173        | LOC422173 | 0.77092  | 1481.5  |
| ENSGALT0000 uncharacterized LOC422179             | LOC422179 | 0.928358 | 22      |
| ENSGALT0000 uncharacterized LOC422198             | LOC422198 | 0.649519 | 0.5     |
| ENSGALT0000 uncharacterized LOC422212             | LOC422212 | 0.758067 | 302.5   |
| ENSGALT0000 forty-two-three domain containing 1   | LOC422221 | 0.98177  | 199     |
| ENSGALT0000 transmembrane 9 superfamily mer       | LOC422249 | 0.956517 | 1927.5  |
| ENSGALT0000 uncharacterized LOC422270             | LOC422270 | 0.998177 | 243     |

|                                                    |           |          |         |
|----------------------------------------------------|-----------|----------|---------|
| ENSGALT0000 sodium/hydrogen exchanger 2-like       | LOC422276 | 0.931225 | 73.7586 |
| ENSGALT0000 response gene to complement 32 $\zeta$ | LOC422284 | 0.377717 | 118.5   |
| ENSGALT0000 uncharacterized                        | LOC422293 | 0.801449 | 550.998 |
| ENSGALT0000 SLAIN motif-containing protein-like    | LOC422298 | 0.902818 | 1107.5  |
| ENSGALT0000 centrin-1-like                         | LOC422304 | 0.796356 | 5       |
| ENSGALT0000 ES1 protein homolog, mitochondria      | LOC422305 | 0.903823 | 16.5    |
| ENSGALT0000 immune-responsive gene 1 protein       | LOC422307 | 0.578696 | 29      |
| ENSGALT0000 exocyst complex component 1-like       | LOC422308 | 0.631223 | 0       |
| ENSGALT0000 vascular endothelial growth factor r   | LOC422316 | 0.866111 | 987.5   |
| ENSGALT0000 ligand of Numb protein X 2-like        | LOC422320 | 0.948026 | 965.5   |
| ENSGALT0000 ras-like protein family member 11A     | LOC422321 | 0.877393 | 368.5   |
| ENSGALT0000 wiskott-Aldrich syndrome protein fa    | LOC422323 | 0.887009 | 176     |
| ENSGALT0000 uncharacterized                        | LOC422372 | 0.973515 | 308     |
| ENSGALT0000 uncharacterized                        | LOC422426 | 0.976458 | 287     |
| ENSGALT0000 uncharacterized                        | LOC422442 | 0.820571 | 699     |
| ENSGALT0000 mannosyl (alpha-1,3-)-glycoprotein     | LOC422448 | 0.866459 | 8       |
| ENSGALT0000 uncharacterized                        | LOC422459 | 0.991055 | 22.5    |
| ENSGALT0000 viral interleukin-8 homolog            | LOC422509 | 0.477728 | 0.5     |
| ENSGALT0000 cytochrome P450 2U1-like               | LOC422528 | 0.987981 | 62.5    |
| ENSGALT0000 GTPase IMAP family member-like         | LOC422532 | 0.972445 | 27.5    |
| ENSGALT0000 uncharacterized                        | LOC422577 | 0.464758 | 0.5     |
| ENSGALT0000 uncharacterized                        | LOC422619 | 0.603682 | 0.5     |
| ENSGALT0000 uncharacterized                        | LOC422643 | 0.927329 | 23.3106 |
| ENSGALT0000 chemokine (C-X-C motif) ligand 1-li    | LOC422654 | 0.19245  | 0.5     |
| ENSGALT0000 uncharacterized                        | LOC422681 | 0.85632  | 3       |
| ENSGALT0000 uncharacterized                        | LOC422725 | 0.734793 | 3.5     |
| ENSGALT0000 Neuropeptide-like protein C4orf48 l    | LOC422894 | 0.75249  | 943.5   |
| ENSGALT0000 uncharacterized                        | LOC422895 | 0.854559 | 453.002 |
| ENSGALT0000 transmembrane emp24 protein trar       | LOC422906 | 0.649519 | 0.5     |
| ENSGALT0000 uncharacterized                        | LOC422928 | 0.94691  | 6       |
| ENSGALT0000 interferon-induced transmembrane       | LOC422993 | 0.399635 | 1       |
| ENSGALT0000 protein-L-isoaspartate (D-aspartate    | LOC423008 | 0.915603 | 496.5   |
| ENSGALT0000 proteoglycan 2, bone marrow-like       | LOC423134 | 0.891761 | 86.5    |
| ENSGALT0000 cytosolic phospholipase A2 epsilon     | LOC423229 | 0.643623 | 3       |
| ENSGALT0000 acyl-coenzyme A thioesterase 2, m      | LOC423247 | 0.911688 | 554.5   |
| ENSGALT0000 CGI-146 protein                        | LOC423256 | 0.938396 | 65      |
| ENSGALT0000 galectin-related protein-like          | LOC423277 | 0.975818 | 65.5    |
| ENSGALT0000 uncharacterized                        | LOC423306 | 0.960065 | 70      |
| ENSGALT0000 uncharacterized                        | LOC423317 | 0.446169 | 5       |
| ENSGALT0000 uncharacterized                        | LOC423321 | 0.927641 | 290.5   |
| ENSGALT0000 acyl-CoA synthetase short-chain fa     | LOC423347 | 0.953889 | 20.5    |
| ENSGALT0000 uncharacterized                        | LOC423393 | ?        | 0       |
| ENSGALT0000 protein unc-79 homolog                 | LOC423425 | 0.989168 | 51      |
| ENSGALT0000 uncharacterized                        | LOC423462 | 0.809337 | 18.5    |
| ENSGALT0000 uncharacterized                        | LOC423478 | 0.906881 | 66.5    |
| ENSGALT0000 uncharacterized                        | LOC423523 | 0.97871  | 756     |
| ENSGALT0000 potassium channel, subfamily K, m      | LOC423536 | 0.782832 | 46      |
| ENSGALT0000 protein NDNF-like                      | LOC423605 | 0.368197 | 94.5    |
| ENSGALT0000 rap1 GTPase-GDP dissociation stir      | LOC423623 | 0.997408 | 7.5     |
| ENSGALT0000 uncharacterized                        | LOC423629 | ?        | 0       |
| ENSGALT0000 phenylserine dehydratase-like          | LOC423635 | 0.663175 | 17      |
| ENSGALT0000 solute carrier family 22 member 15     | LOC423653 | 0.951185 | 104.5   |
| ENSGALT0000 neurotrypsin-like                      | LOC423740 | 0.946141 | 409     |
| ENSGALT0000 uncharacterized                        | LOC423752 | 0.971944 | 319.5   |
| ENSGALT0000 lipase member M-like                   | LOC423786 | 0.845084 | 0.42843 |
| ENSGALT0000 uncharacterized                        | LOC423820 | 0.99662  | 10      |

|                                                   |           |          |          |
|---------------------------------------------------|-----------|----------|----------|
| ENSGALT0000 uncharacterized LOC423995             | LOC423995 | 0.649519 | 1        |
| ENSGALT0000 uncharacterized LOC424007             | LOC424007 | 0.828826 | 3        |
| ENSGALT0000 putative methyltransferase            | LOC424014 | 0.738882 | 6112     |
| ENSGALT0000 aryl hydrocarbon receptor-like        | LOC424033 | 0.892686 | 37       |
| ENSGALT0000 alpha-aspartyl dipeptidase            | LOC424109 | 0.811161 | 386.5    |
| ENSGALT0000 uncharacterized LOC424199             | LOC424199 | 0.531737 | 4.5      |
| ENSGALT0000 transforming growth factor, beta rec  | LOC424261 | 0.600269 | 130.5    |
| ENSGALT0000 uncharacterized LOC424334             | LOC424334 | 0.547092 | 0.5      |
| ENSGALT0000 ADAMTS-like protein 2-like            | LOC424420 | 0.93518  | 846.999  |
| ENSGALT0000 quinone oxidoreductase-like 2         | LOC424430 | 0.450122 | 163.5    |
| ENSGALT0000 uncharacterized LOC424473             | LOC424473 | 0.972072 | 11.5     |
| ENSGALT0000 epithelial chloride channel protein-l | LOC424523 | 0.897102 | 10.5     |
| ENSGALT0000 uncharacterized LOC424620             | LOC424620 | 0.60689  | 0.5      |
| ENSGALT0000 cytochrome P450 2J2-like              | LOC424676 | 0.977462 | 420.41   |
| ENSGALT0000 cytochrome P450 2J2-like              | LOC424677 | 0.993672 | 1129.81  |
| ENSGALT0000 FRAS1-related extracellular matrix    | LOC424679 | 0.757159 | 16       |
| ENSGALT0000 structure-specific endonuclease su    | LOC424727 | 0.508356 | 348.5    |
| ENSGALT0000 cytochrome P450 2J2-like              | LOC424729 | 0.661596 | 106      |
| ENSGALT0000 IN                                    | LOC424740 | 0.974608 | 471      |
| ENSGALT0000 uncharacterized LOC424816             | LOC424816 | 0.464758 | 0        |
| ENSGALT0000 D-beta-hydroxybutyrate dehydroge      | LOC424892 | 0.948264 | 259.058  |
| ENSGALT0000 organic solute transporter subunit ε  | LOC424916 | 0.79356  | 4        |
| ENSGALT0000 deoxyribodipyrimidine photo-lyase-    | LOC424919 | 0.914698 | 1040.92  |
| ENSGALT0000 uncharacterized LOC424925             | LOC424925 | 0.930057 | 23.5     |
| ENSGALT0000 cytochrome P450 2J6-like              | LOC424943 | 0.898356 | 0.5      |
| ENSGALT0000 cytochrome P450 2J2-like              | LOC424944 | 0.738072 | 3        |
| ENSGALT0000 uncharacterized LOC425004             | LOC425004 | 0.464758 | 0        |
| ENSGALT0000 hypothetical protein LOC425111        | LOC425111 | 0.975767 | 458.603  |
| ENSGALT0000 hypothetical protein LOC425113        | LOC425113 | 0.494491 | 24.5988  |
| ENSGALT0000 aldo-keto reductase family 1, meml    | LOC425137 | 0.754574 | 646.724  |
| ENSGALT0000 adenylate kinase isoenzyme 6          | LOC425215 | 0.912366 | 477.5    |
| ENSGALT0000 HEAT repeat-containing protein 7B     | LOC425311 | 0.856595 | 1.5      |
| ENSGALT0000 hypothetical protein LOC425375        | LOC425375 | 0.987574 | 704      |
| ENSGALT0000 zona pellucida-binding protein 2-lik  | LOC425470 | ?        | 0        |
| ENSGALT0000 ras-related protein Rab-18-B-like     | LOC425531 | 0.92963  | 133      |
| ENSGALT0000 hypothetical protein LOC425534        | LOC425534 | 0.211987 | 4.34E-35 |
| ENSGALT0000 lymphoid-restricted membrane prot     | LOC425540 | 0.964359 | 5        |
| ENSGALT0000 ovostatin-like                        | LOC425757 | 0.948209 | 19       |
| ENSGALT0000 histone H2B                           | LOC426037 | ?        | 0        |
| ENSGALT0000 claw keratin-like                     | LOC426218 | ?        | 1.07E-26 |
| ENSGALT0000 meiosis-specific nuclear structural p | LOC426295 | 0.9897   | 94.2982  |
| ENSGALT0000 tetratricopeptide repeat protein 38-l | LOC426599 | 0.961688 | 257.899  |
| ENSGALT0000 uncharacterized LOC426710             | LOC426710 | 0.865074 | 1.5      |
| ENSGALT0000 uncharacterized LOC426893             | LOC426893 | 0.64457  | 12.5     |
| ENSGALT0000 uncharacterized LOC426902             | LOC426902 | 0.456411 | 6.5      |
| ENSGALT0000 scale keratin-like                    | LOC426912 | 0.817456 | 0.49706  |
| ENSGALT0000 feather keratin 1-like                | LOC426913 | ?        | 0        |
| ENSGALT0000 exonuclease NEF-sp                    | LOC427001 | 0.974981 | 682.007  |
| ENSGALT0000 uncharacterized LOC427240             | LOC427240 | 0.818488 | 1.5      |
| ENSGALT0000 riboflavin kinase-like                | LOC427259 | 0.760538 | 50.5     |
| ENSGALT0000 S-adenosylmethionine synthase isc     | LOC427292 | 0.813752 | 3        |
| ENSGALT0000 lipid phosphate phosphatase-relate    | LOC427306 | 0.794558 | 991      |
| ENSGALT0000 uncharacterized LOC427369             | LOC427369 | 0.464758 | 1        |
| ENSGALT0000 avidin-related protein 2-like         | LOC427416 | 0.932897 | 14.9612  |
| ENSGALT0000 uncharacterized LOC427470             | LOC427470 | ?        | 0        |
| ENSGALT0000 histamine H3 receptor-like            | LOC427545 | 0.951154 | 94       |

|                                                                           |           |          |          |
|---------------------------------------------------------------------------|-----------|----------|----------|
| ENSGALT0000 neural-cadherin-like                                          | LOC427547 | 0.975308 | 34       |
| ENSGALT0000 parvalbumin beta-like                                         | LOC427654 | 0.649519 | 0.5      |
| ENSGALT0000 forkhead box protein L1-like                                  | LOC427656 | 0.629678 | 4        |
| ENSGALT0000 chemokine-like receptor 1-like                                | LOC427665 | 0.697918 | 5        |
| ENSGALT0000 sodium-dependent serotonin transporter-like                   | LOC427700 | 0.325147 | 18.5     |
| ENSGALT0000 ectonucleoside triphosphate diphosphate                       | LOC427773 | 0.678887 | 4.5      |
| ENSGALT0000 3-ketosteroid-9-alpha-hydroxylase-like                        | LOC427775 | 0.539038 | 0.5      |
| ENSGALT0000 apoptosis-inducing factor 3-like                              | LOC427826 | 0.786348 | 17.5     |
| ENSGALT0000 histone H2A                                                   | LOC427881 | 0.637611 | 108.285  |
| ENSGALT0000 histone H1                                                    | LOC427882 | 0.713352 | 77.8017  |
| ENSGALT0000 histone H4-like                                               | LOC427884 | 0.439289 | 0.07084  |
| ENSGALT0000 histone H2A-IV-like                                           | LOC427891 | 0.736554 | 305.247  |
| ENSGALT0000 histone 11R H1                                                | LOC427896 | 0.406115 | 13.3155  |
| ENSGALT0000 BPI fold-containing family C protein-like                     | LOC427911 | 0.649519 | 0.5      |
| ENSGALT0000 sodium- and chloride-dependent G-protein-coupled receptor     | LOC427923 | 0.93105  | 3        |
| ENSGALT0000 GART-B                                                        | LOC427977 | 0.961086 | 28.5     |
| ENSGALT0000 regucalcin-like                                               | LOC428008 | 0.455998 | 1        |
| ENSGALT0000 fibrinogen-like protein 1-like                                | LOC428073 | 0.467211 | 50.5     |
| ENSGALT0000 high affinity choline transporter 1-like                      | LOC428094 | 0.285445 | 0        |
| ENSGALT0000 olfactory receptor 52B2-like                                  | LOC428111 | 0.607862 | 3.5      |
| ENSGALT0000 olfactory receptor 52I1-like                                  | LOC428119 | 0.603682 | 3        |
| ENSGALT0000 thyrotropin-releasing hormone receptor-like                   | LOC428144 | 0.464758 | 0        |
| ENSGALT0000 ras-related protein Rab-39B-like                              | LOC428212 | 0.993163 | 27.5     |
| ENSGALT0000 parathyroid hormone/parathyroid hormone-related protein       | LOC428277 | 0.635721 | 13       |
| ENSGALT0000 myosin light chain kinase, smooth muscle type 1               | LOC428278 | 0.856456 | 7.5      |
| ENSGALT0000 feather keratin 3-like                                        | LOC428289 | ?        | 0        |
| ENSGALT0000 feather keratin Cos1-1/Cos1-3/Cos1-4-like                     | LOC428291 | ?        | 0        |
| ENSGALT0000 feather keratin Cos1-1/Cos1-3/Cos1-4-like                     | LOC428293 | 0.464794 | 0        |
| ENSGALT0000 feather keratin Cos1-1/Cos1-3/Cos1-4-like                     | LOC428295 | 0.107383 | 0        |
| ENSGALT0000 feather keratin Cos1-1/Cos1-3/Cos1-4-like                     | LOC428297 | ?        | 0        |
| ENSGALT0000 feather keratin Cos1-1/Cos1-3/Cos1-4-like                     | LOC428298 | 0.464758 | 1.45E-15 |
| ENSGALT0000 feather keratin Cos1-1/Cos1-3/Cos1-4-like                     | LOC428299 | ?        | 1.45E-15 |
| ENSGALT0000 excitatory amino acid transporter 5-like                      | LOC428322 | 0.957871 | 29       |
| ENSGALT0000 leucine-rich repeat-containing protein-like                   | LOC428383 | 0.649519 | 0.5      |
| ENSGALT0000 carboxymethylenebutenolidase homolog                          | LOC428499 | ?        | 0        |
| ENSGALT0000 epidermal retinol dehydrogenase 2-like                        | LOC428538 | 0.464758 | 0        |
| ENSGALT0000 uncharacterized LOC428541                                     | LOC428541 | 0.481181 | 13       |
| ENSGALT0000 diacylglycerol O-acyltransferase 2-like                       | LOC428693 | 0.988322 | 42       |
| ENSGALT0000 uncharacterized LOC428714                                     | LOC428714 | 0.625644 | 4.5      |
| ENSGALT0000 testis-specific serine/threonine-protein kinase               | LOC428720 | 0.464758 | 0.5      |
| ENSGALT0000 general transcription factor IIE subunit                      | LOC428778 | 0.962735 | 2.5      |
| ENSGALT0000 SITS-binding protein-like                                     | LOC428824 | 0.933518 | 32       |
| ENSGALT0000 \N                                                            | LOC428834 | 0.711006 | 5.5      |
| ENSGALT0000 embryonic protein UVS.2-like                                  | LOC428867 | 0.649519 | 1        |
| ENSGALT0000 2-hydroxyacylsphingosine 1-beta-galactosyltransferase         | LOC428949 | 0.412698 | 80       |
| ENSGALT0000 lysosomal acid lipase/cholesterol esterase                    | LOC428958 | 0.636897 | 0.07157  |
| ENSGALT0000 dopamine D1C receptor                                         | LOC428961 | 0.464758 | 0        |
| ENSGALT0000 solute carrier family 2, facilitated glucose transporter-like | LOC428971 | 0.848019 | 121.5    |
| ENSGALT0000 fatty-acid amide hydrolase 1-like                             | LOC429098 | 0.803695 | 2.52762  |
| ENSGALT0000 methylcrotonoyl-Coenzyme A carboxylase                        | LOC429115 | 0.955786 | 469      |
| ENSGALT0000 cytochrome P450 2J6-like                                      | LOC429152 | ?        | 0        |
| ENSGALT0000 cytochrome P450 2J6-like                                      | LOC429153 | 0.464758 | 0        |
| ENSGALT0000 feather keratin Cos1-1/Cos1-3/Cos1-4-like                     | LOC429206 | 0.63888  | 4.60E-16 |
| ENSGALT0000 tetraspanin-7-like                                            | LOC429348 | 0.863524 | 5        |
| ENSGALT0000 keratin D                                                     | LOC429492 | ?        | 0        |
| ENSGALT0000 feather keratin Cos1-1/Cos1-3/Cos1-4-like                     | LOC429742 | 0.474108 | 4.60E-16 |

|                                                  |           |          |          |
|--------------------------------------------------|-----------|----------|----------|
| ENSGALT0000 G protein-activated inward rectifier | LOC429785 | 0.61007  | 48.5     |
| ENSGALT0000 zinc finger protein 184-like         | LOC429800 | 0.986577 | 6        |
| ENSGALT0000 claw keratin-like                    | LOC430658 | 0.464758 | 1.27E-09 |
| ENSGALT0000 claw keratin-like                    | LOC430661 | 0.464758 | 2.49E-09 |
| ENSGALT0000 G-protein coupled receptor 183-like  | LOC431250 | 0.930458 | 13       |
| ENSGALT0000 feather keratin Cos1-1/Cos1-3/Cos    | LOC431276 | 0.464758 | 0        |
| ENSGALT0000 keratin                              | LOC431321 | ?        | 0        |
| ENSGALT0000 beta-keratin-related protein-like    | LOC431323 | ?        | 0        |
| ENSGALT0000 keratin A                            | LOC431324 | ?        | 0        |
| ENSGALT0000 feather keratin Cos1-1/Cos1-3/Cos    | LOC431352 | 0.464758 | 1.5      |
| ENSGALT0000 uncharacterized LOC431615            | LOC431615 | 0.818488 | 0.5      |
| ENSGALT0000 aminopeptidase Q-like                | LOC431649 | 0.725192 | 31.5     |
| ENSGALT0000 probable phospholipid-transporting   | LOC431656 | 0.987926 | 1006.01  |
| ENSGALT0000 avidin-like                          | LOC431660 | 0.005247 | 4.5      |
| ENSGALT0000 noggin 4                             | LOC693258 | 0.649519 | 0        |
| ENSGALT0000 IN                                   | LOC693265 | 0.884612 | 146.5    |
| ENSGALT0000 histone H3.2-like                    | LOC768333 | 0.159397 | 38.4175  |
| ENSGALT0000 tubulin beta-2 chain-like            | LOC768337 | 0.643503 | 30330.6  |
| ENSGALT0000 MHC-like class I Y                   | LOC768350 | 0.122649 | 271.592  |
| ENSGALT0000 B-cell differentiation antigen CD72- | LOC768355 | 0.648521 | 0.5      |
| ENSGALT0000 uncharacterized LOC768416            | LOC768416 | 0.483482 | 1.15E-05 |
| ENSGALT0000 zinc finger FYVE domain-containing   | LOC768418 | 0.997422 | 148.893  |
| ENSGALT0000 uncharacterized LOC768436            | LOC768436 | 0.712114 | 353.5    |
| ENSGALT0000 uncharacterized LOC768497            | LOC768497 | 0.464758 | 0        |
| ENSGALT0000 uncharacterized LOC768535            | LOC768535 | 0.680693 | 1.5      |
| ENSGALT0000 E3 SUMO-protein ligase RanBP2-li     | LOC768553 | 0.916974 | 14.9346  |
| ENSGALT0000 baculoviral IAP repeat-containing p  | LOC768589 | ?        | 0        |
| ENSGALT0000 uncharacterized LOC768596            | LOC768596 | 0.464758 | 0        |
| ENSGALT0000 interferon type A3-like              | LOC768614 | 0.646548 | 0.61929  |
| ENSGALT0000 uncharacterized LOC768635            | LOC768635 | 0.942701 | 42.5     |
| ENSGALT0000 dual specificity protein phosphatas  | LOC768665 | 0.164317 | 0        |
| ENSGALT0000 uncharacterized protein KIAA1671     | LOC768701 | 0.999325 | 1432     |
| ENSGALT0000 uncharacterized LOC768709            | LOC768709 | 0.405524 | 536.5    |
| ENSGALT0000 uncharacterized LOC768735            | LOC768735 | 0.838306 | 74.5     |
| ENSGALT0000 platelet glycoprotein VI-like        | LOC768742 | 0.464302 | 1.3461   |
| ENSGALT0000 uncharacterized LOC768770            | LOC768770 | 0.883833 | 3        |
| ENSGALT0000 uncharacterized LOC768803            | LOC768803 | 0.541644 | 43       |
| ENSGALT0000 trypsin I-P1-like                    | LOC768817 | ?        | 0        |
| ENSGALT0000 uncharacterized LOC768834            | LOC768834 | ?        | 0        |
| ENSGALT0000 claw keratin-like                    | LOC768967 | 0.464758 | 2.49E-09 |
| ENSGALT0000 olfactory receptor 52R1-like         | LOC769103 | ?        | 0        |
| ENSGALT0000 ADP-ribosylation factor-like 8B-like | LOC769134 | 0.314033 | 423.141  |
| ENSGALT0000 feather keratin 1-like               | LOC769139 | 0.584645 | 0        |
| ENSGALT0000 C-type lectin-like receptor variant  | LOC769174 | 0.722096 | 0.5      |
| ENSGALT0000 uncharacterized LOC769207            | LOC769207 | 0.93009  | 19.5     |
| ENSGALT0000 uncharacterized LOC769232            | LOC769232 | 0.853815 | 1        |
| ENSGALT0000 TBC1 domain family member 24-lik     | LOC769242 | 0.979667 | 84.9999  |
| ENSGALT0000 uncharacterized LOC769250            | LOC769250 | 0.722096 | 1.5      |
| ENSGALT0000 uncharacterized LOC769251            | LOC769251 | 0.826334 | 11       |
| ENSGALT0000 neuropeptide B-like                  | LOC769277 | 0.157863 | 791      |
| ENSGALT0000 olfactory receptor 52R1-like         | LOC769317 | 0.916871 | 3        |
| ENSGALT0000 fatty acyl-CoA hydrolase precursor,  | LOC769339 | 0.941046 | 188.488  |
| ENSGALT0000 uncharacterized LOC769382            | LOC769382 | 0.649519 | 0.5      |
| ENSGALT0000 C-type lectin domain family 2 meml   | LOC769384 | 0.787355 | 60.9066  |
| ENSGALT0000 uncharacterized LOC769438            | LOC769438 | 0.994715 | 84       |
| ENSGALT0000 feather keratin 1-like               | LOC769491 | 0.440838 | 0.31467  |

|                                                   |                     |            |          |
|---------------------------------------------------|---------------------|------------|----------|
| ENSGALT0000 microsomal triglyceride transfer prc  | LOC769580           | 0.79946    | 2        |
| ENSGALT0000 uncharacterized                       | LOC769608 LOC769608 | 0.00141703 | 1.35E-08 |
| ENSGALT0000 uncharacterized                       | LOC769642 LOC769642 | 0.20548    | 0        |
| ENSGALT0000 uncharacterized                       | LOC769670 LOC769670 | 0.85858    | 2        |
| ENSGALT0000 PR domain zinc finger protein 10-lil  | LOC769676           | 0.982824   | 625.5    |
| ENSGALT0000 uncharacterized                       | LOC769697 LOC769697 | 0.898356   | 0.5      |
| ENSGALT0000 kazal-type serine protease inhibitor  | LOC769726           | 0.917269   | 10.5     |
| ENSGALT0000 uncharacterized                       | LOC769727 LOC769727 | 0.982871   | 38       |
| ENSGALT0000 uncharacterized                       | LOC769731 LOC769731 | ?          | 0        |
| ENSGALT0000 magnesium transporter NIPA2-like      | LOC769755           | 0.959769   | 513      |
| ENSGALT0000 uncharacterized                       | LOC769806 LOC769806 | 0.969644   | 144.5    |
| ENSGALT0000 histone H3.2-like                     | LOC769809           | 0.417683   | 794.017  |
| ENSGALT0000 probable G-protein coupled receptc    | LOC769837           | 0.70447    | 8        |
| ENSGALT0000 uncharacterized                       | LOC769885 LOC769885 | 0.826353   | 1.5      |
| ENSGALT0000 histone H2B 1/2/3/4/6-like            | LOC769973           | 0.362619   | 78.3527  |
| ENSGALT0000 histone H4-like                       | LOC770005           | 0.93631    | 194.407  |
| ENSGALT0000 uncharacterized                       | LOC770010 LOC770010 | ?          | 0        |
| ENSGALT0000 histone H3.2-like                     | LOC770022           | 0.0864548  | 27.5473  |
| ENSGALT0000 histone H4-like                       | LOC770079           | 0.93631    | 194.407  |
| ENSGALT0000 uncharacterized                       | LOC770113 LOC770113 | 0.74806    | 3.5      |
| ENSGALT0000 cytochrome P450 2J2-like              | LOC770119           | 0.853815   | 5        |
| ENSGALT0000 uncharacterized                       | LOC770127 LOC770127 | 0.914565   | 19.5     |
| ENSGALT0000 histone H4-like                       | LOC770142           | 0.151749   | 21.1209  |
| ENSGALT0000 feather keratin Cos1-1/Cos1-3/Cos     | LOC770152           | 0.639428   | 0        |
| ENSGALT0000 uncharacterized                       | LOC770184 LOC770184 | 0.633851   | 23.5     |
| ENSGALT0000 histone H2B 1/2/3/4/6-like            | LOC770188           | 0.404486   | 27.5029  |
| ENSGALT0000 uncharacterized                       | LOC770260 LOC770260 | 0.988161   | 11.5     |
| ENSGALT0000 mitochondrial ubiquitin ligase activa | LOC770265           | 0.832711   | 199.5    |
| ENSGALT0000 histone H2B 1/2/3/4/6-like            | LOC770267           | 0.329358   | 32.9862  |
| ENSGALT0000 low affinity cationic amino acid tran | LOC770309           | 0.585907   | 6        |
| ENSGALT0000 uncharacterized                       | LOC770340 LOC770340 | 0.986383   | 78       |
| ENSGALT0000 uncharacterized                       | LOC770352 LOC770352 | 0.740073   | 0.5      |
| ENSGALT0000 uncharacterized                       | LOC770371 LOC770371 | 0.977955   | 314      |
| ENSGALT0000 cytosolic 5'-nucleotidase 1A-like     | LOC770392           | 0.947423   | 177      |
| ENSGALT0000 WD repeat-containing protein C2or     | LOC770429           | 0.94691    | 2.5      |
| ENSGALT0000 uncharacterized                       | LOC770446 LOC770446 | 0.757187   | 17.5     |
| ENSGALT0000 uncharacterized                       | LOC770458 LOC770458 | ?          | 0        |
| ENSGALT0000 mitochondrial import receptor subu    | LOC770490           | 0.345438   | 653.5    |
| ENSGALT0000 ras-related and estrogen-regulated    | LOC770492           | 0.852144   | 15.5     |
| ENSGALT0000 1-acyl-sn-glycerol-3-phosphate acy    | LOC770506           | 0.871074   | 4.5      |
| ENSGALT0000 fibrinogen silencer-binding protein-I | LOC770634           | 0.993569   | 332.5    |
| ENSGALT0000 nucleophosmin-like                    | LOC770649           | ?          | 0        |
| ENSGALT0000 tripartite motif-containing protein 3 | LOC770718           | 0.580411   | 27       |
| ENSGALT0000 feather keratin Cos1-1/Cos1-3/Cos     | LOC770723           | ?          | 1.45E-15 |
| ENSGALT0000 trypsin inhibitor CITI-1-like         | LOC770729           | 0.108094   | 67       |
| ENSGALT0000 WW domain-binding protein 2-like      | LOC770780           | 0.923162   | 1459.5   |
| ENSGALT0000 uncharacterized                       | LOC770838 LOC770838 | ?          | 0        |
| ENSGALT0000 uncharacterized                       | LOC770857 LOC770857 | 0.660747   | 487.255  |
| ENSGALT0000 lipase member M-like                  | LOC770870           | 0.945734   | 14       |
| ENSGALT0000 lipase member M-like                  | LOC770883           | 0.637409   | 6.5      |
| ENSGALT0000 lipase member M-like                  | LOC770890           | 0.956481   | 6.5      |
| ENSGALT0000 deoxycytidine kinase-like             | LOC770922           | 0.857873   | 983.97   |
| ENSGALT0000 serine/threonine-protein kinase SR    | LOC770936           | 0.763338   | 134.03   |
| ENSGALT0000 feather keratin 3-like                | LOC770940           | ?          | 0        |
| ENSGALT0000 L-gulonolactone oxidase-like          | LOC770996           | 0.903391   | 54.5     |
| ENSGALT0000 feather keratin 2-like                | LOC771021           | ?          | 0        |



|                                                   |           |          |         |
|---------------------------------------------------|-----------|----------|---------|
| ENSGALT0000 uncharacterized LOC771028             | LOC771028 | 0.47963  | 2.5     |
| ENSGALT0000 uncharacterized LOC771030             | LOC771030 | 0.740073 | 1       |
| ENSGALT0000 C-factor-like                         | LOC771069 | 0.841087 | 35      |
| ENSGALT0000 pinopsin-like                         | LOC771085 | 0.615036 | 0.5     |
| ENSGALT0000 uncharacterized LOC771141             | LOC771141 | 0.898356 | 0.5     |
| ENSGALT0000 urotensin-2 receptor-like             | LOC771154 | 0.988724 | 79      |
| ENSGALT0000 uncharacterized LOC771455             | LOC771455 | 0.949577 | 26      |
| ENSGALT0000 uncharacterized LOC771537             | LOC771537 | 0.990993 | 139     |
| ENSGALT0000 uncharacterized LOC771545             | LOC771545 | 0.899554 | 141.5   |
| ENSGALT0000 HEPACAM family member 2-like          | LOC771647 | 0.713771 | 4.69298 |
| ENSGALT0000 hepatocyte cell adhesion molecule-    | LOC771657 | 0.997687 | 8.80702 |
| ENSGALT0000 C-type lectin domain family 19 men    | LOC771758 | 0.430114 | 117.5   |
| ENSGALT0000 tyrosine 3-monooxygenase-like         | LOC771761 | ?        | 0       |
| ENSGALT0000 complement receptor type 2-like       | LOC771877 | 0.644023 | 43      |
| ENSGALT0000 uncharacterized LOC771935             | LOC771935 | 0.612578 | 3       |
| ENSGALT0000 uncharacterized LOC771972             | LOC771972 | 0.963694 | 78      |
| ENSGALT0000 kelch repeat-containing protein 2-li  | LOC772017 | 0.995332 | 34.5    |
| ENSGALT0000 uncharacterized LOC772071             | LOC772071 | 0.958582 | 1759.53 |
| ENSGALT0000 uncharacterized LOC772117             | LOC772117 | 0.94691  | 3.5     |
| ENSGALT0000 organic solute transporter subunit ε  | LOC772218 | 0.915403 | 37      |
| ENSGALT0000 uncharacterized LOC772245             | LOC772245 | 0.98121  | 25      |
| ENSGALT0000 protein CXorf40A-like                 | LOC772269 | 0.921398 | 251     |
| ENSGALT0000 SUN domain-containing protein 3-li    | LOC776146 | 0.72719  | 13.6533 |
| ENSGALT0000 loss of heterozygosity, 12, chromos   | LOH12CR1  | 0.961226 | 1209.23 |
| ENSGALT0000 lon peptidase 1, mitochondrial        | LONP1     | 0.981198 | 2339    |
| ENSGALT0000 lon peptidase 2, peroxisomal          | LONP2     | 0.947653 | 1047.5  |
| ENSGALT0000 LON peptidase N-terminal domain       | LONRF1    | 0.970308 | 168     |
| ENSGALT0000 LON peptidase N-terminal domain       | LONRF2    | 0.991913 | 1533    |
| ENSGALT0000 LON peptidase N-terminal domain       | LONRF3    | 0.769212 | 219.5   |
| ENSGALT0000 lysyl oxidase                         | LOX       | 0.861465 | 78.5    |
| ENSGALT0000 lipoxygenase homology domains 1       | LOXHD1    | 0.53465  | 66      |
| ENSGALT0000 lysyl oxidase-like 2                  | LOXL2     | 0.956748 | 344     |
| ENSGALT0000 lysyl oxidase-like 3                  | LOXL3     | 0.947221 | 250     |
| ENSGALT0000 lysyl oxidase-like 4                  | LOXL4     | 0.792764 | 8.5     |
| ENSGALT0000 lysophosphatidic acid receptor 2      | LPAR2     | 0.930507 | 302.5   |
| ENSGALT0000 lysophosphatidic acid receptor 3      | LPAR3     | 0.775512 | 133.5   |
| ENSGALT0000 \N                                    | LPAR6     | 0.928818 | 628.5   |
| ENSGALT0000 lysophosphatidylcholine acyltransfe   | LPCAT1    | 0.990584 | 493     |
| ENSGALT0000 lysophosphatidylcholine acyltransfe   | LPCAT2    | 0.944145 | 273.5   |
| ENSGALT0000 lysophosphatidylcholine acyltransfe   | LPCAT3    | 0.949126 | 1278.5  |
| ENSGALT0000 lysophosphatidylglycerol acyltransf   | LPGAT1    | 0.924707 | 676     |
| ENSGALT0000 latrophilin 3                         | LPHN3     | 0.969484 | 5165.5  |
| ENSGALT0000 lipin 1                               | LPIN1     | 0.97488  | 434     |
| ENSGALT0000 lipin 2                               | LPIN2     | 0.953698 | 706.501 |
| ENSGALT0000 lipin 3                               | LPIN3     | 0.990977 | 3.5     |
| ENSGALT0000 lipoprotein lipase                    | LPL       | 0.929516 | 366.501 |
| ENSGALT0000 lactoperoxidase                       | LPO       | 0.464758 | 0.5     |
| ENSGALT0000 LIM domain containing preferred tra   | LPP       | 0.979195 | 785.227 |
| ENSGALT0000 lipid phosphate phosphatase-relate    | LPPR4     | 0.929951 | 316     |
| ENSGALT0000 lipid phosphate phosphatase-relate    | LPPR5     | 0.716175 | 53.5    |
| ENSGALT0000 leupaxin                              | LPXN      | 0.638699 | 16      |
| ENSGALT0000 lecithin retinol acyltransferase (pho | LRAT      | 0.887439 | 22      |
| ENSGALT0000 LPS-responsive vesicle trafficking,   | LRBA      | 0.987759 | 3223    |
| ENSGALT0000 leucine-rich repeats and calponin h   | LRCH1     | 0.982089 | 174.5   |
| ENSGALT0000 leucine-rich repeats and calponin h   | LRCH2     | 0.942715 | 548.5   |
| ENSGALT0000 leucine rich repeat and fibronectin   | LRFN2     | 0.637345 | 3.5     |

|                                                         |          |         |
|---------------------------------------------------------|----------|---------|
| ENSGALT0000 leucine rich repeat and fibronectin 1LRFN3  | 0.808113 | 153     |
| ENSGALT0000 leucine rich repeat and fibronectin 1LRFN5  | 0.759589 | 276.001 |
| ENSGALT0000 leucine-rich repeats and guanylate LRGUK    | 0.973796 | 83      |
| ENSGALT0000 ligand dependent nuclear receptor LRIF1     | 0.98966  | 380     |
| ENSGALT0000 leucine-rich repeats and immunoglκLRIG1     | 0.589287 | 1189    |
| ENSGALT0000 leucine-rich repeats and immunoglκLRIG2     | 0.988205 | 2247    |
| ENSGALT0000 leucine-rich repeats and immunoglκLRIG3     | 0.983864 | 697     |
| ENSGALT0000 leucine-rich repeat, immunoglobulir LRIT1   | 0.699173 | 27      |
| ENSGALT0000 leucine-rich repeat, immunoglobulir LRIT2   | 0.624698 | 2.5     |
| ENSGALT0000 leucine-rich repeat, immunoglobulir LRIT3   | 0.293716 | 0.5     |
| ENSGALT0000 lymphoid-restricted membrane prot LRMP      | 0.951722 | 10      |
| ENSGALT0000 low density lipoprotein receptor-relκLRP11  | 0.694972 | 1248    |
| ENSGALT0000 low density lipoprotein receptor-relκLRP12  | 0.994067 | 1651.5  |
| ENSGALT0000 low density lipoprotein receptor-relκLRP1B  | 0.967682 | 1303    |
| ENSGALT0000 low density lipoprotein receptor-relκLRP2   | 0.979556 | 7312.06 |
| ENSGALT0000 LRP2 binding protein LRP2BP                 | 0.975207 | 214.5   |
| ENSGALT0000 low density lipoprotein receptor-relκLRP3   | 0.980938 | 486.5   |
| ENSGALT0000 low density lipoprotein receptor-relκLRP4   | 0.880944 | 1584    |
| ENSGALT0000 low density lipoprotein receptor-relκLRP5   | 0.996206 | 1169.01 |
| ENSGALT0000 low density lipoprotein receptor-relκLRP6   | 0.988494 | 1287    |
| ENSGALT0000 low density lipoprotein receptor-relκLRP8   | 0.863687 | 409.5   |
| ENSGALT0000 low density lipoprotein receptor-relκLRPAP1 | 0.975791 | 1901    |
| ENSGALT0000 leucine-rich PPR-motif containing LRPPRC    | 0.921404 | 3899.46 |
| ENSGALT0000 leucine rich repeat protein 1 LRR1          | 0.880631 | 508.5   |
| ENSGALT0000 leucine rich repeat containing 1 LRRC1      | 0.996552 | 706     |
| ENSGALT0000 leucine rich repeat containing 10 LRRC10    | 0.464758 | 0       |
| ENSGALT0000 leucine rich repeat containing 10B LRRC10B  | 0.955281 | 93.5    |
| ENSGALT0000 leucine rich repeat containing 14B LRRC14B  | ?        | 0       |
| ENSGALT0000 leucine rich repeat containing 15 LRRC15    | 0.890837 | 32.5    |
| ENSGALT0000 leucine rich repeat containing 16A LRRC16A  | 0.951571 | 2374    |
| ENSGALT0000 leucine rich repeat containing 17 LRRC17    | 0.98269  | 691.41  |
| ENSGALT0000 leucine rich repeat containing 18 LRRC18    | 0.639897 | 1.5     |
| ENSGALT0000 leucine rich repeat containing 19 LRRC19    | 0.955526 | 94.5    |
| ENSGALT0000 leucine rich repeat containing 2 LRRC2      | 0.464758 | 0       |
| ENSGALT0000 leucine rich repeat containing 20 LRRC20    | 0.365594 | 352     |
| ENSGALT0000 leucine rich repeat containing 23 LRRC23    | 0.935565 | 34      |
| ENSGALT0000 leucine rich repeat containing 26 LRRC26    | ?        | 0       |
| ENSGALT0000 leucine rich repeat containing 28 LRRC28    | 0.984901 | 631.998 |
| ENSGALT0000 leucine rich repeat containing 30 LRRC30    | ?        | 0       |
| ENSGALT0000 leucine rich repeat containing 31 LRRC31    | 0.927758 | 209.5   |
| ENSGALT0000 leucine rich repeat containing 32 LRRC32    | 0.774051 | 48.5    |
| ENSGALT0000 leucine rich repeat containing 33 LRRC33    | 0.978114 | 117     |
| ENSGALT0000 leucine rich repeat containing 34 LRRC34    | 0.951232 | 108     |
| ENSGALT0000 leucine rich repeat containing 38 LRRC38    | 0.993614 | 84.5    |
| ENSGALT0000 leucine rich repeat containing 39 LRRC39    | 0.914884 | 9.76054 |
| ENSGALT0000 leucine rich repeat containing 3B LRRC3B    | 0.974461 | 31.5    |
| ENSGALT0000 leucine rich repeat containing 40 LRRC40    | 0.936105 | 1165.5  |
| ENSGALT0000 leucine rich repeat containing 41 LRRC41    | 0.953683 | 448.658 |
| ENSGALT0000 leucine rich repeat containing 42 LRRC42    | 0.832299 | 737     |
| ENSGALT0000 leucine rich repeat containing 43 LRRC43    | 0.803731 | 6.5     |
| ENSGALT0000 leucine rich repeat containing 45 LRRC45    | 0.978468 | 1215.02 |
| ENSGALT0000 leucine rich repeat containing 46 LRRC46    | 0.964623 | 42      |
| ENSGALT0000 leucine rich repeat containing 47 LRRC47    | 0.81652  | 911     |
| ENSGALT0000 leucine rich repeat containing 48 LRRC48    | 0.974944 | 122.5   |
| ENSGALT0000 leucine rich repeat containing 49 LRRC49    | 0.962289 | 270     |
| ENSGALT0000 leucine rich repeat containing 4C LRRC4C    | 0.989428 | 377.501 |

|                                                           |         |          |         |
|-----------------------------------------------------------|---------|----------|---------|
| ENSGALT0000 leucine rich repeat containing 52             | LRRC52  | 0.69838  | 52      |
| ENSGALT0000 leucine rich repeat containing 56             | LRRC56  | 0.983207 | 42.5    |
| ENSGALT0000 leucine rich repeat containing 57             | LRRC57  | 0.994085 | 160.5   |
| ENSGALT0000 leucine rich repeat containing 58             | LRRC58  | 0.948203 | 205     |
| ENSGALT0000 leucine rich repeat containing 59             | LRRC59  | 0.958461 | 1817.54 |
| ENSGALT0000 leucine rich repeat containing 6              | LRRC6   | 0.756658 | 324     |
| ENSGALT0000 leucine rich repeat containing 61             | LRRC61  | 0.49411  | 184     |
| ENSGALT0000 leucine rich repeat containing 67             | LRRC67  | 0.868279 | 30.5    |
| ENSGALT0000 leucine rich repeat containing 7              | LRRC7   | 0.757368 | 160     |
| ENSGALT0000 leucine rich repeat containing 72             | LRRC72  | 0.87343  | 14.5    |
| ENSGALT0000 leucine rich repeat containing 73             | LRRC73  | 0.668253 | 598.999 |
| ENSGALT0000 leucine rich repeat containing 8 far          | LRRC8A  | 0.960168 | 1924.5  |
| ENSGALT0000 leucine rich repeat containing 8 far          | LRRC8B  | 0.921457 | 462.5   |
| ENSGALT0000 leucine rich repeat containing 8 far          | LRRC8C  | 0.995522 | 329.5   |
| ENSGALT0000 leucine rich repeat containing 8 far          | LRRC8D  | 0.998067 | 757.5   |
| ENSGALT0000 leucine rich repeat containing 9              | LRRC9   | 0.522055 | 0.5     |
| ENSGALT0000 leucine rich repeat and coiled-coil c         | LRRC1   | 0.948934 | 151.5   |
| ENSGALT0000 leucine-rich repeats and death dom            | LRRC1   | 0.859598 | 13      |
| ENSGALT0000 leucine rich repeat (in FLII) interact        | LRRFIP1 | 0.90685  | 356.5   |
| ENSGALT0000 leucine rich repeat (in FLII) interact        | LRRFIP2 | 0.878577 | 1629.01 |
| ENSGALT0000 leucine-rich repeats and IQ motif $\alpha$    | LRRIQ1  | 0.904115 | 123.5   |
| ENSGALT0000 leucine-rich repeats and IQ motif $\alpha$    | LRRIQ4  | 0.910609 | 8.5     |
| ENSGALT0000 leucine-rich repeat kinase 1                  | LRRK1   | 0.736463 | 2362.5  |
| ENSGALT0000 leucine rich repeat neuronal 1                | LRRN1   | 0.931471 | 2946    |
| ENSGALT0000 leucine rich repeat neuronal 2                | LRRN2   | 0.757889 | 332.5   |
| ENSGALT0000 leucine rich repeat neuronal 3                | LRRN3   | 0.663101 | 37.5    |
| ENSGALT0000 leucine rich repeat neuronal 4                | LRRN4   | 0.947054 | 320     |
| ENSGALT0000 leucine rich repeat transmembrane             | LRRTM1  | 0.88487  | 190.5   |
| ENSGALT0000 leucine rich repeat transmembrane             | LRRTM2  | 0.760368 | 18.5    |
| ENSGALT0000 leucine rich repeat transmembrane             | LRRTM3  | 0.631904 | 57.5    |
| ENSGALT0000 leucine rich repeat transmembrane             | LRRTM4  | 0.916664 | 245     |
| ENSGALT0000 leucine rich repeat and sterile alph          | LRSAM1  | 0.865433 | 840     |
| ENSGALT0000 leucine-rich repeats and transmem             | LRTM1   | 0.538823 | 5.5     |
| ENSGALT0000 leucine-rich repeats and transmem             | LRTM2   | 0.892545 | 10.5    |
| ENSGALT0000 leucine-rich repeats and WD repea             | LRWD1   | 0.963455 | 2113.76 |
| ENSGALT0000 limbic system-associated membran              | LSAMP   | 0.692581 | 466.498 |
| ENSGALT0000 large subunit GTPase 1 homolog ( $\epsilon$ ) | LSG1    | 0.910897 | 2034.51 |
| ENSGALT0000 LSM1 homolog, U6 small nuclear                | FLSM1   | 0.27613  | 412     |
| ENSGALT0000 LSM10, U7 small nuclear RNA ass               | LSM10   | 0.547549 | 287.5   |
| ENSGALT0000 LSM11, U7 small nuclear RNA ass               | LSM11   | 0.906744 | 308.5   |
| ENSGALT0000 LSM12 homolog (S. cerevisiae)                 | LSM12   | 0.795514 | 315.5   |
| ENSGALT0000 LSM14A, SCD6 homolog A (S. cer                | LSM14A  | 0.958964 | 3790.06 |
| ENSGALT0000 LSM14B, SCD6 homolog B (S. cer                | LSM14B  | 0.904156 | 1112.5  |
| ENSGALT0000 LSM3 homolog, U6 small nuclear                | FLSM3   | 0.85757  | 564.5   |
| ENSGALT0000 LSM4 homolog, U6 small nuclear                | FLSM4   | 0.617595 | 1445    |
| ENSGALT0000 LSM5 homolog, U6 small nuclear                | FLSM5   | 0.8835   | 439.5   |
| ENSGALT0000 LSM6 homolog, U6 small nuclear                | FLSM6   | 0.908475 | 441     |
| ENSGALT0000 LSM7 homolog, U6 small nuclear                | FLSM7   | 0.918833 | 1461.5  |
| ENSGALT0000 lymphocyte-specific protein 1                 | LSP1    | 0.917561 | 2145.46 |
| ENSGALT0000 lanosterol synthase (2,3-oxidosqua            | LSS     | 0.748159 | 1291.5  |
| ENSGALT0000 leukotriene A4 hydrolase                      | LTA4H   | 0.858045 | 2177.5  |
| ENSGALT0000 latent transforming growth factor $\beta$     | LTBP1   | 0.882597 | 9325.5  |
| ENSGALT0000 latent transforming growth factor $\beta$     | LTBP2   | 0.890122 | 847.5   |
| ENSGALT0000 leukotriene C4 synthase                       | LTC4S   | 0.926054 | 10      |
| ENSGALT0000 lactotransferrin                              | LTF     | 0.930259 | 3216.95 |
| ENSGALT0000 leukocyte receptor tyrosine kinase            | LTK     | 0.788664 | 230     |

|                                                    |            |          |         |
|----------------------------------------------------|------------|----------|---------|
| ENSGALT0000 listerin E3 ubiquitin protein ligase 1 | LTN1       | 0.982682 | 1473.5  |
| ENSGALT0000 LTV1 homolog (S. cerevisiae)           | LTV1       | 0.983137 | 998     |
| ENSGALT0000 LUC7-like (S. cerevisiae)              | LUC7L      | 0.92521  | 1071    |
| ENSGALT0000 LUC7-like 2 (S. cerevisiae)            | LUC7L2     | 0.956758 | 2373.5  |
| ENSGALT0000 LUC7-like 3 (S. cerevisiae)            | LUC7L3     | 0.982152 | 4214.11 |
| ENSGALT0000 lumican                                | LUM        | 0.521199 | 124     |
| ENSGALT0000 leucine zipper protein 1               | LUZP1      | 0.89631  | 65.5    |
| ENSGALT0000 leucine zipper protein 2               | LUZP2      | 0.861598 | 68.5    |
| ENSGALT0000 latexin                                | LXN        | 0.978815 | 126.324 |
| ENSGALT0000 lymphocyte antigen 6 complex, loci     | LY6E       | 0.68596  | 1741    |
| ENSGALT0000 lymphocyte antigen 75                  | LY75       | 0.972017 | 1599.5  |
| ENSGALT0000 lymphocyte antigen 86                  | LY86       | 0.731556 | 44.5    |
| ENSGALT0000 lymphocyte antigen 96                  | LY96       | 0.927729 | 4       |
| ENSGALT0000 Ly1 antibody reactive homolog (mo      | LYAR       | 0.973882 | 680.5   |
| ENSGALT0000 lysozyme G-like 2                      | LYG2       | 0.881603 | 9       |
| ENSGALT0000 v-yes-1 Yamaguchi sarcoma viral r      | LYN        | 0.998965 | 321.5   |
| ENSGALT0000 LY6/PLAUR domain containing 1          | LYPD1      | 0.658346 | 369.815 |
| ENSGALT0000 LY6/PLAUR domain containing 2          | LYPD2      | ?        | 0       |
| ENSGALT0000 LY6/PLAUR domain containing 6          | LYPD6      | 0.894292 | 125     |
| ENSGALT0000 LY6/PLAUR domain containing 6B         | LYPD6B     | 0.820581 | 325.5   |
| ENSGALT0000 lysophospholipase II                   | LYPLA2     | 0.836719 | 2135.5  |
| ENSGALT0000 lysophospholipase-like 1               | LYPLAL1    | 0.890138 | 206     |
| ENSGALT0000 LYR motif containing 1                 | LYRM1      | 0.970133 | 520.5   |
| ENSGALT0000 LYR motif containing 2                 | LYRM2      | 0.435179 | 243.77  |
| ENSGALT0000 LYR motif containing 4                 | LYRM4      | 0.863359 | 15.5    |
| ENSGALT0000 LYR motif containing 5                 | LYRM5      | 0.939972 | 98.0769 |
| ENSGALT0000 Lym7 homolog (mouse)                   | LYRM7      | 0.992542 | 65.5    |
| ENSGALT0000 LysM, putative peptidoglycan-bindin    | LYSMD2     | 0.753775 | 857     |
| ENSGALT0000 LysM, putative peptidoglycan-bindin    | LYSMD3     | 0.957283 | 448.5   |
| ENSGALT0000 LysM, putative peptidoglycan-bindin    | LYSMD4     | 0.963237 | 819     |
| ENSGALT0000 lysosomal trafficking regulator        | LYST       | 0.999951 | 1356.5  |
| ENSGALT0000 lymphatic vessel endothelial hyalur    | LYVE1      | 0.970707 | 19.5    |
| ENSGALT0000 lysozyme (renal amyloidosis)           | LYZ        | 0.955266 | 21.5    |
| ENSGALT0000 leucine zipper and CTNNBIP1 dom        | LZIC       | 0.898063 | 2453.5  |
| ENSGALT0000 leucine zipper transcription factor-li | LZTFL1     | 0.98659  | 991     |
| ENSGALT0000 leucine-zipper-like transcription reg  | LZTR1      | 0.907267 | 1171.5  |
| ENSGALT0000 leucine zipper, putative tumor supp    | LZTS1      | 0.78293  | 384.5   |
| ENSGALT0000 leucine zipper, putative tumor supp    | LZTS2      | 0.940294 | 391.5   |
| ENSGALT0000 Protein MRP-126                        | M126_CHICK | 0.963731 | 27.4425 |
| ENSGALT0000 mannose-6-phosphate receptor (ca       | M6PR       | 0.9443   | 3525.47 |
| ENSGALT0000 mab-21-like 1 (C. elegans)             | MAB21L1    | 0.583129 | 195.034 |
| ENSGALT0000 M                                      | MAB21L2    | 0.439627 | 36.9664 |
| ENSGALT0000 mab-21-like 3 (C. elegans)             | MAB21L3    | 0.985046 | 68.5    |
| ENSGALT0000 metastasis associated in colon can     | MACC1      | 0.985966 | 73      |
| ENSGALT0000 microtubule-actin crosslinking facto   | MACF1      | 0.907534 | 15559   |
| ENSGALT0000 MAD1 mitotic arrest deficient-like 1   | MAD1L1     | 0.897718 | 792     |
| ENSGALT0000 MAD2 mitotic arrest deficient-like 1   | MAD2L1     | 0.62057  | 1581    |
| ENSGALT0000 MAD2L1 binding protein                 | MAD2L1BP   | 0.921587 | 240     |
| ENSGALT0000 MAD2 mitotic arrest deficient-like 2   | MAD2L2     | 0.928989 | 1180    |
| ENSGALT0000 MAP-kinase activating death doma       | MADD       | 0.967724 | 2821    |
| ENSGALT0000 ADP-ribosyltransferase 1               | MADPRT     | 0.46679  | 1       |
| ENSGALT0000 macrophage erythroblast attacher       | MAEA       | 0.954626 | 1586.51 |
| ENSGALT0000 maelstrom homolog (Drosophila)         | MAEL       | 0.734344 | 1.5     |
| ENSGALT0000 v-maf musculoaponeurotic fibrosar      | MAFB       | 0.716377 | 686     |
| ENSGALT0000 v-maf musculoaponeurotic fibrosar      | MAFF       | 0.747581 | 992.5   |
| ENSGALT0000 v-maf musculoaponeurotic fibrosar      | MAFG       | 0.925662 | 236.5   |

|                                                     |          |          |         |
|-----------------------------------------------------|----------|----------|---------|
| ENSGALT0000 v-maf musculoaponeurotic fibrosar       | MAFK     | 0.916657 | 188.5   |
| ENSGALT0000 membrane associated guanylate ki        | MAGI1    | 0.764512 | 2188.49 |
| ENSGALT0000 membrane associated guanylate ki        | MAGI2    | 0.974835 | 306     |
| ENSGALT0000 membrane associated guanylate ki        | MAGI3    | 0.998135 | 2327.5  |
| ENSGALT0000 mago-nashi homolog, proliferation-      | MAGOH    | 0.385589 | 3319.95 |
| ENSGALT0000 magnesium transporter 1                 | MAGT1    | 0.951581 | 3914    |
| ENSGALT0000 male germ cell-associated kinase        | MAK      | 0.961955 | 37.5    |
| ENSGALT0000 MAK16 homolog (S. cerevisiae)           | MAK16    | 0.890511 | 855.5   |
| ENSGALT0000 mal, T-cell differentiation protein     | MAL      | 0.714799 | 3       |
| ENSGALT0000 mal, T-cell differentiation protein 2   | (MAL2    | 0.993027 | 71.5    |
| ENSGALT0000 mal, T-cell differentiation protein-lik | MALL     | 0.960077 | 125.5   |
| ENSGALT0000 mitochondrial assembly of ribosom       | MALSU1   | 0.929581 | 483.5   |
| ENSGALT0000 mucosa associated lymphoid tissu        | MALT1    | 0.951898 | 373     |
| ENSGALT0000 MAM domain containing 2                 | MAMDC2   | 0.670963 | 39      |
| ENSGALT0000 MAM domain containing 4                 | MAMDC4   | 0.939346 | 10      |
| ENSGALT0000 mastermind-like 1 (Drosophila)          | MAML1    | 0.994114 | 1462.5  |
| ENSGALT0000 mastermind-like 3 (Drosophila)          | MAML3    | 0.991267 | 841     |
| ENSGALT0000 mastermind-like domain containing       | MAMLD1   | 0.990305 | 562.998 |
| ENSGALT0000 mannosidase, alpha, class 1A, mer       | MAN1A1   | 0.886341 | 170     |
| ENSGALT0000 mannosidase, alpha, class 1A, mer       | MAN1A2   | 0.991927 | 1316.5  |
| ENSGALT0000 mannosidase, alpha, class 1B, mer       | MAN1B1   | 0.943133 | 1177.5  |
| ENSGALT0000 mannosidase, alpha, class 1C, mer       | MAN1C1   | 0.872303 | 301     |
| ENSGALT0000 mannosidase, alpha, class 2A, mer       | MAN2A1   | 0.967543 | 494.5   |
| ENSGALT0000 mannosidase, alpha, class 2A, mer       | MAN2A2   | 0.952723 | 4566.5  |
| ENSGALT0000 mannosidase, alpha, class 2B, mer       | MAN2B2   | 0.984075 | 4953    |
| ENSGALT0000 mannosidase, alpha, class 2C, mer       | MAN2C1   | 0.955663 | 1308.49 |
| ENSGALT0000 mannosidase, beta A, lysosomal          | MANBA    | 0.992725 | 772.5   |
| ENSGALT0000 mannosidase, endo-alpha                 | MANEA    | 0.982467 | 478.5   |
| ENSGALT0000 mannosidase, endo-alpha-like            | MANEAL   | 0.793551 | 177     |
| ENSGALT0000 mesencephalic astrocyte-derived n       | MANF     | 0.604318 | 3302    |
| ENSGALT0000 MANSC domain containing 1               | MANSC1   | 0.956801 | 167.853 |
| ENSGALT0000 monoamine oxidase A                     | MAOA     | 0.674262 | 104     |
| ENSGALT0000 monoamine oxidase B                     | MAOB     | 0.890915 | 84      |
| ENSGALT0000 microtubule-associated protein 1A       | MAP1A    | 0.806181 | 3432    |
| ENSGALT0000 microtubule-associated protein 1B       | MAP1B    | 0.772777 | 4890.52 |
| ENSGALT0000 microtubule-associated protein 1 liç    | MAP1LC3A | 0.849822 | 916     |
| ENSGALT0000 microtubule-associated protein 1 liç    | MAP1LC3C | 0.839015 | 25.5    |
| ENSGALT0000 microtubule-associated protein 2        | MAP2     | 0.778066 | 1457    |
| ENSGALT0000 mitogen-activated protein kinase ki     | MAP2K1   | 0.926768 | 1794    |
| ENSGALT0000 mitogen-activated protein kinase ki     | MAP2K2   | 0.729407 | 1503    |
| ENSGALT0000 mitogen-activated protein kinase ki     | MAP2K3   | 0.906309 | 745.497 |
| ENSGALT0000 mitogen-activated protein kinase ki     | MAP2K4   | 0.924061 | 557     |
| ENSGALT0000 mitogen-activated protein kinase ki     | MAP2K5   | 0.737035 | 2370.52 |
| ENSGALT0000 mitogen-activated protein kinase ki     | MAP3K1   | 0.910737 | 987.5   |
| ENSGALT0000 mitogen-activated protein kinase ki     | MAP3K13  | 0.858285 | 707.226 |
| ENSGALT0000 mitogen-activated protein kinase ki     | MAP3K14  | 0.969407 | 1061.99 |
| ENSGALT0000 mitogen-activated protein kinase ki     | MAP3K15  | 0.754254 | 38.5    |
| ENSGALT0000 mitogen-activated protein kinase ki     | MAP3K2   | 0.978209 | 686     |
| ENSGALT0000 mitogen-activated protein kinase ki     | MAP3K3   | 0.973203 | 779.499 |
| ENSGALT0000 mitogen-activated protein kinase ki     | MAP3K4   | 0.951014 | 840     |
| ENSGALT0000 mitogen-activated protein kinase ki     | MAP3K5   | 0.942104 | 700.5   |
| ENSGALT0000 mitogen-activated protein kinase ki     | MAP3K7   | 0.954068 | 3903.5  |
| ENSGALT0000 mitogen-activated protein kinase ki     | MAP3K8   | 0.868647 | 12.5    |
| ENSGALT0000 microtubule-associated protein 4        | MAP4     | 0.743994 | 2446    |
| ENSGALT0000 mitogen-activated protein kinase ki     | MAP4K3   | 0.977833 | 1518    |
| ENSGALT0000 mitogen-activated protein kinase ki     | MAP4K4   | 0.92248  | 4908.77 |

|                                                    |                   |           |         |
|----------------------------------------------------|-------------------|-----------|---------|
| ENSGALT0000 mitogen-activated protein kinase ki    | MAP4K5            | 0.972793  | 1078    |
| ENSGALT0000 microtubule-associated protein 6       | MAP6              | 0.716237  | 919     |
| ENSGALT0000 microtubule-associated protein 7       | MAP7              | 0.982304  | 1184    |
| ENSGALT0000 MAP7 domain containing 1               | MAP7D1            | 0.74766   | 1925.5  |
| ENSGALT0000 MAP7 domain containing 2               | MAP7D2            | 0.952013  | 1101    |
| ENSGALT0000 MAP7 domain containing 3               | MAP7D3            | 0.899367  | 1220.5  |
| ENSGALT0000 microtubule-associated protein 9       | MAP9              | 0.999205  | 23      |
| ENSGALT0000 mitogen-activated protein kinase 1     | MAPK1             | 0.94035   | 1499.98 |
| ENSGALT0000 mitogen-activated protein kinase 10    | MAPK10            | 0.649405  | 231.5   |
| ENSGALT0000 mitogen-activated protein kinase 11    | MAPK11            | 0.935237  | 519.503 |
| ENSGALT0000 mitogen-activated protein kinase 12    | MAPK12            | 0.775458  | 104     |
| ENSGALT0000 mitogen-activated protein kinase 13    | MAPK13            | 0.850566  | 383.5   |
| ENSGALT0000 mitogen-activated protein kinase 14    | MAPK14            | 0.956695  | 1096.5  |
| ENSGALT0000 mitogen-activated protein kinase 15    | MAPK15            | 0.995098  | 250.5   |
| ENSGALT0000 mitogen-activated protein kinase 1     | MAPK1IP1L         | 0.910129  | 1545    |
| ENSGALT0000 mitogen-activated protein kinase 6     | MAPK6             | 0.845502  | 30786.5 |
| ENSGALT0000 mitogen-activated protein kinase 8     | MAPK8             | 0.988781  | 1566    |
| ENSGALT0000 mitogen-activated protein kinase 8     | MAPK8IP1          | 0.860984  | 3058    |
| ENSGALT0000 mitogen-activated protein kinase 8     | MAPK8IP3          | 0.928732  | 6837.07 |
| ENSGALT0000 mitogen-activated protein kinase 9     | MAPK9             | 0.975407  | 548.5   |
| ENSGALT0000 mitogen-activated protein kinase a     | MAPKAP1           | 0.963083  | 1019    |
| ENSGALT0000 mitogen-activated protein kinase-a     | MAPKAPK2          | 0.971898  | 2835    |
| ENSGALT0000 mitogen-activated protein kinase-a     | MAPKAPK3          | 0.942693  | 967.5   |
| ENSGALT0000 mitogen-activated protein kinase-a     | MAPKAPK5          | 0.955087  | 551.503 |
| ENSGALT0000 mitogen-activated protein kinase bi    | MAPKBP1           | 0.96306   | 993.758 |
| ENSGALT0000 microtubule-associated protein, RP     | MAPRE1            | 0.82204   | 7390.5  |
| ENSGALT0000 microtubule-associated protein, RP     | MAPRE2            | 0.863425  | 3155.49 |
| ENSGALT0000 membrane-associated ring finger (C     | Mar-04            | 0.761455  | 61      |
| ENSGALT0000 mitochondrial amidoxime reducing       | MARC2             | 0.911797  | 698     |
| ENSGALT0000 membrane-associated ring finger (C     | MARCH1            | 0.852079  | 127     |
| ENSGALT0000 membrane-associated ring finger (C     | MARCH11           | 0.399721  | 2       |
| ENSGALT0000 membrane-associated ring finger (C     | MARCH2            | 0.90902   | 212     |
| ENSGALT0000 membrane-associated ring finger (C     | MARCH3            | 0.0330281 | 2.5     |
| ENSGALT0000 membrane-associated ring finger (C     | MARCH6            | 0.942366  | 1642    |
| ENSGALT0000 membrane-associated ring finger (C     | MARCH7            | 0.959418  | 1698    |
| ENSGALT0000 membrane-associated ring finger (C     | MARCH8            | 0.985044  | 240.5   |
| ENSGALT0000 MARCKS-like 1                          | MARCKSL1          | 0.661982  | 13705   |
| ENSGALT0000 macrophage receptor with collagen      | MARCO             | 0.274016  | 4       |
| ENSGALT0000 E3 ubiquitin-protein ligase            | MARCH MARH5_CHICK | 0.980373  | 1469.5  |
| ENSGALT0000 MAP/microtubule affinity-regulating    | MARK1             | 0.928042  | 1484.5  |
| ENSGALT0000 MAP/microtubule affinity-regulating    | MARK3             | 0.959257  | 3146.5  |
| ENSGALT0000 methionyl-tRNA synthetase 2, mito      | MARS2             | 0.904959  | 506     |
| ENSGALT0000 MARVEL domain containing 3             | MARVELD3          | 0.978736  | 568.5   |
| ENSGALT0000 MAS1 oncogene                          | MAS1              | ?         | 0       |
| ENSGALT0000 mannan-binding lectin serine peptic    | MASP1             | 0.90097   | 53.5    |
| ENSGALT0000 mannan-binding lectin serine peptic    | MASP2             | 0.858289  | 10.5    |
| ENSGALT0000 microtubule associated serine/threoc   | MAST2             | 0.911837  | 3416.5  |
| ENSGALT0000 microtubule associated serine/threoc   | MAST3             | 0.9445    | 1278    |
| ENSGALT0000 microtubule associated serine/threoc   | MAST4             | 0.996774  | 512     |
| ENSGALT0000 microtubule associated serine/threoc   | MASTL             | 0.949662  | 187.5   |
| ENSGALT0000 methionine adenosyltransferase I, ;    | MAT1A             | 0.707664  | 34      |
| ENSGALT0000 methionine adenosyltransferase II, MAT | MAT2B             | 0.95597   | 898     |
| ENSGALT0000 megakaryocyte-associated tyrosine      | MATK              | 0.977121  | 76.5    |
| ENSGALT0000 matrilin 1, cartilage matrix protein   | MATN1             | 0.981212  | 24      |
| ENSGALT0000 matrilin 2                             | MATN2             | 0.995707  | 76.5    |
| ENSGALT0000 matrilin 3                             | MATN3             | 0.998991  | 12      |

|                                                   |        |          |         |
|---------------------------------------------------|--------|----------|---------|
| ENSGALT0000 matrilin 4                            | MATN4  | 0.811101 | 11591   |
| ENSGALT0000 matrin 3                              | MATR3  | 0.96004  | 11803   |
| ENSGALT0000 MAU2 chromatid cohesion factor h      | MAU2   | 0.96872  | 1767    |
| ENSGALT0000 mitochondrial antiviral signaling prc | MAVS   | 0.991494 | 1639    |
| ENSGALT0000 myoglobin                             | MB     | 0.466351 | 5.5     |
| ENSGALT0000 Mab-21 domain containing 1            | MB21D1 | 0.890426 | 178.5   |
| ENSGALT0000 Mab-21 domain containing 2            | MB21D2 | 0.741957 | 715.5   |
| ENSGALT0000 methyl-CpG binding domain proteir     | MBD3   | 0.952858 | 3815.5  |
| ENSGALT0000 methyl-CpG binding domain proteir     | MBD4   | 0.615169 | 27628.5 |
| ENSGALT0000 methyl-CpG binding domain proteir     | MBD5   | 0.993878 | 1995    |
| ENSGALT0000 MAP3K12 binding inhibitory proteir    | MBIP   | 0.94494  | 454.5   |
| ENSGALT0000 mannose-binding lectin (protein C)    | MBL2   | 0.727157 | 14      |
| ENSGALT0000 metallo-beta-lactamase domain cor     | MBLAC2 | 0.986337 | 241.5   |
| ENSGALT0000 muscleblind-like (Drosophila)         | MBNL1  | 0.961302 | 1471    |
| ENSGALT0000 muscleblind-like 2 (Drosophila)       | MBNL2  | 0.993291 | 222     |
| ENSGALT0000 muscleblind-like 3 (Drosophila)       | MBNL3  | 0.958858 | 790.494 |
| ENSGALT0000 membrane bound O-acyltransferas       | MBOAT1 | 0.950029 | 539.5   |
| ENSGALT0000 membrane bound O-acyltransferas       | MBOAT2 | 0.999621 | 828.5   |
| ENSGALT0000 membrane bound O-acyltransferas       | MBOAT4 | 0.464758 | 0       |
| ENSGALT0000 myelin basic protein                  | MBP    | 0.8976   | 63      |
| ENSGALT0000 mbt domain containing 1               | MBTD1  | 0.992949 | 1526    |
| ENSGALT0000 membrane-bound transcription fact     | MBTPS1 | 0.995765 | 3639    |
| ENSGALT0000 membrane-bound transcription fact     | MBTPS2 | 0.935887 | 147     |
| ENSGALT0000 melanocortin 1 receptor               | MC1R   | 0.170215 | 9       |
| ENSGALT0000 melanocortin 2 receptor (adrenocor    | MC2R   | ?        | 0       |
| ENSGALT0000 melanocortin 4 receptor               | MC4R   | 0.714805 | 1.5     |
| ENSGALT0000 melanocortin 5 receptor               | MC5R   | 0.915522 | 13      |
| ENSGALT0000 melanoma cell adhesion molecule       | MCAM   | 0.975302 | 5699.53 |
| ENSGALT0000 malonyl CoA:ACP acyltransferase (     | MCAT   | 0.874737 | 759     |
| ENSGALT0000 mutated in colorectal cancers         | MCC    | 0.952034 | 392     |
| ENSGALT0000 methylcrotonoyl-CoA carboxylase 1     | MCCC1  | 0.968202 | 873     |
| ENSGALT0000 methylcrotonoyl-CoA carboxylase 2     | MCCC2  | 0.948471 | 857     |
| ENSGALT0000 methylmalonyl CoA epimerase           | MCEE   | 0.9313   | 159.5   |
| ENSGALT0000 MCF.2 cell line derived transformin   | MCF2   | 0.912663 | 561.5   |
| ENSGALT0000 MCF.2 cell line derived transformin   | MCF2L  | 0.895079 | 401.5   |
| ENSGALT0000 MCF.2 cell line derived transformin   | MCF2L2 | 0.699372 | 74      |
| ENSGALT0000 multiple coagulation factor deficien  | MCFD2  | 0.991965 | 1795    |
| ENSGALT0000 melanin-concentrating hormone rec     | MCHR1  | 1        | 0.5     |
| ENSGALT0000 myeloid cell leukemia sequence 1 (    | MCL1   | 0.909589 | 651.503 |
| ENSGALT0000 minichromosome maintenance con        | MCM10  | 0.938756 | 680.998 |
| ENSGALT0000 minichromosome maintenance con        | MCM2   | 0.89474  | 4518    |
| ENSGALT0000 minichromosome maintenance con        | MCM3   | 0.872468 | 4099.5  |
| ENSGALT0000 minichromosome maintenance con        | MCM3AP | 0.967993 | 3130.5  |
| ENSGALT0000 minichromosome maintenance con        | MCM4   | 0.919119 | 2608.5  |
| ENSGALT0000 minichromosome maintenance con        | MCM5   | 0.742044 | 5364    |
| ENSGALT0000 minichromosome maintenance con        | MCM6   | 0.912778 | 3903.25 |
| ENSGALT0000 minichromosome maintenance con        | MCM8   | 0.978348 | 662     |
| ENSGALT0000 minichromosome maintenance con        | MCMBP  | 0.881531 | 2453.48 |
| ENSGALT0000 mucolipin 1                           | MCOLN1 | 0.947394 | 2563.5  |
| ENSGALT0000 mucolipin 2                           | MCOLN2 | 0.8048   | 45.5    |
| ENSGALT0000 mucolipin 3                           | MCOLN3 | 0.879966 | 42.5    |
| ENSGALT0000 microcephalin 1                       | MCPH1  | 0.9573   | 190.5   |
| ENSGALT0000 microspherule protein 1               | MCRS1  | 0.713744 | 5370.5  |
| ENSGALT0000 multiple C2 domains, transmembra      | MCTP1  | 0.957307 | 180.5   |
| ENSGALT0000 multiple C2 domains, transmembra      | MCTP2  | 0.950402 | 41      |
| ENSGALT0000 malignant T cell amplified sequenc    | MCTS1  | 0.747854 | 1163.5  |

|                                                |         |          |         |
|------------------------------------------------|---------|----------|---------|
| ENSGALT0000 mitochondrial calcium uniporter    | MCU     | 0.943773 | 750.5   |
| ENSGALT0000 MyoD family inhibitor              | MDFI    | 0.833503 | 1633.5  |
| ENSGALT0000 MyoD family inhibitor domain conta | MDFIC   | 0.988814 | 327.42  |
| ENSGALT0000 MAM domain containing glycosylpt   | MDGA1   | 0.722672 | 823.5   |
| ENSGALT0000 MAM domain containing glycosylpt   | MDGA2   | 0.967178 | 2966.46 |
| ENSGALT0000 malate dehydrogenase 1, NAD (sol   | MDH1    | 0.851986 | 5915    |
| ENSGALT0000 malate dehydrogenase 1B, NAD (s    | MDH1B   | 0.951963 | 51      |
| ENSGALT0000 malate dehydrogenase 2, NAD (mit   | MDH2    | 0.609051 | 5044    |
| ENSGALT0000 midkine (neurite growth-promoting  | MDK     | 0.721824 | 89793   |
| ENSGALT0000 Mdm1 nuclear protein homolog (m    | MDM1    | 0.998143 | 888.996 |
| ENSGALT0000 Mdm2 p53 binding protein homoloç   | MDM2    | 0.982081 | 565.497 |
| ENSGALT0000 Mdm4 p53 binding protein homoloç   | MDM4    | 0.989867 | 993.5   |
| ENSGALT0000 MDN1, midasin homolog (yeast)      | MDN1    | 0.964707 | 3595.5  |
| ENSGALT0000 malic enzyme 1, NADP(+)-depende    | ME1     | 0.891097 | 1789.47 |
| ENSGALT0000 malic enzyme 2, NAD(+)-depende     | ME2     | 0.872506 | 628     |
| ENSGALT0000 hypothetical protein LOC419617     | MEAF6   | 0.887887 | 1601.51 |
| ENSGALT0000 MDS1 and EVI1 complex locus        | MECOM   | 0.996285 | 729     |
| ENSGALT0000 mitochondrial trans-2-enoyl-CoA re | MECR    | 0.747665 | 354.5   |
| ENSGALT0000 mediator complex subunit 1         | MED1    | 0.951584 | 2107.5  |
| ENSGALT0000 mediator complex subunit 10        | MED10   | 0.723393 | 913     |
| ENSGALT0000 mediator complex subunit 12        | MED12   | 0.961302 | 4746.83 |
| ENSGALT0000 mediator complex subunit 12-like   | MED12L  | 0.986086 | 1189    |
| ENSGALT0000 mediator complex subunit 13        | MED13   | 0.982782 | 4227.5  |
| ENSGALT0000 mediator complex subunit 13-like   | MED13L  | 0.988598 | 2790.5  |
| ENSGALT0000 mediator complex subunit 14        | MED14   | 0.980396 | 1995    |
| ENSGALT0000 mediator complex subunit 15        | MED15   | 0.969454 | 851.5   |
| ENSGALT0000 mediator complex subunit 16        | MED16   | 0.938537 | 3005.5  |
| ENSGALT0000 mediator complex subunit 17        | MED17   | 0.905972 | 1501.5  |
| ENSGALT0000 mediator complex subunit 19        | MED19   | 0.778646 | 650.5   |
| ENSGALT0000 mediator complex subunit 20        | MED20   | 0.569155 | 1409.5  |
| ENSGALT0000 mediator complex subunit 21        | MED21   | 0.402605 | 916     |
| ENSGALT0000 mediator complex subunit 22        | MED22   | 0.899479 | 889.505 |
| ENSGALT0000 mediator complex subunit 23        | MED23   | 0.984326 | 2939    |
| ENSGALT0000 thyroid hormone receptor associate | MED24   | 0.929755 | 3933    |
| ENSGALT0000 mediator complex subunit 26        | MED26   | 0.971959 | 102     |
| ENSGALT0000 mediator complex subunit 27        | MED27   | 0.787528 | 1130    |
| ENSGALT0000 mediator complex subunit 28        | MED28   | 0.737765 | 695     |
| ENSGALT0000 mediator complex subunit 30        | MED30   | 0.914318 | 527.5   |
| ENSGALT0000 mediator complex subunit 31        | MED31   | 0.940436 | 1219    |
| ENSGALT0000 mediator complex subunit 4         | MED4    | 0.88851  | 657.5   |
| ENSGALT0000 mediator complex subunit 6         | MED6    | 0.882013 | 890.638 |
| ENSGALT0000 mediator complex subunit 7         | MED7    | 0.901595 | 381.5   |
| ENSGALT0000 mediator complex subunit 8         | MED8    | 0.880236 | 542     |
| ENSGALT0000 mediator complex subunit 9         | MED9    | 0.895732 | 1242    |
| ENSGALT0000 myocyte enhancer factor 2A         | MEF2A   | 0.999487 | 1138.5  |
| ENSGALT0000 myocyte enhancer factor 2B         | MEF2B   | 0.485412 | 3.5     |
| ENSGALT0000 MEF2B neighbor                     | MEF2BNB | 0.633157 | 895.5   |
| ENSGALT0000 myocyte enhancer factor 2C         | MEF2C   | 0.986962 | 336     |
| ENSGALT0000 myocyte enhancer factor 2D         | MEF2D   | 0.965975 | 305.5   |
| ENSGALT0000 multiple EGF-like-domains 10       | MEGF10  | 0.957779 | 847     |
| ENSGALT0000 multiple EGF-like-domains 6        | MEGF6   | 0.977459 | 1359.5  |
| ENSGALT0000 multiple EGF-like-domains 9        | MEGF9   | 0.908426 | 424     |
| ENSGALT0000 meiosis inhibitor 1                | MEI1    | 0.983838 | 129.5   |
| ENSGALT0000 Swi5-dependent recombination DN    | MEIR5   | 0.965897 | 130     |
| ENSGALT0000 Meis homeobox 2                    | MEIS2   | 0.63825  | 82.0803 |
| ENSGALT0000 maternal embryonic leucine zipper  | MELK    | 0.904022 | 512.5   |



|                                                     |          |          |         |
|-----------------------------------------------------|----------|----------|---------|
| ENSGALT0000 mediator of cell motility 1             | MEMO1    | 0.916913 | 1920    |
| ENSGALT0000 mesenchyme homeobox 1                   | MEOX1    | 0.928065 | 56.5    |
| ENSGALT0000 mesenchyme homeobox 2                   | MEOX2    | 0.384024 | 74      |
| ENSGALT0000 meprin A, alpha (PABA peptide hyd       | MEP1A    | 0.738888 | 4.5     |
| ENSGALT0000 meprin A, beta                          | MEP1B    | 0.653239 | 28.5    |
| ENSGALT0000 matrix extracellular phosphoglycop      | MEPE     | 0.649519 | 0.5     |
| ENSGALT0000 c-mer proto-oncogene tyrosine kin       | MERTK    | 0.967953 | 747.503 |
| ENSGALT0000 mesoderm development candidate          | MESDC1   | 0.869838 | 776.5   |
| ENSGALT0000 mesoderm development candidate          | MESDC2   | 0.923764 | 3474.5  |
| ENSGALT0000 mesoderm specific transcript homo       | MEST     | 0.975415 | 233.5   |
| ENSGALT0000 met proto-oncogene (hepatocyte gi       | MET      | 0.650244 | 201.5   |
| ENSGALT0000 methionyl aminopeptidase 1              | METAP1   | 0.959526 | 1138    |
| ENSGALT0000 methionyl aminopeptidase type 1D        | METAP1D  | 0.833816 | 77.5    |
| ENSGALT0000 methionyl aminopeptidase 2              | METAP2   | 0.895482 | 2201.5  |
| ENSGALT0000 meteorin, glial cell differentiation re | METRNL   | 0.459754 | 855     |
| ENSGALT0000 meteorin, glial cell differentiation re | METRNL   | 0.712801 | 2928.5  |
| ENSGALT0000 methyltransferase like 10               | METTL10  | 0.874471 | 384.5   |
| ENSGALT0000 methyltransferase like 11A              | METTL11A | 0.724171 | 763     |
| ENSGALT0000 methyltransferase like 11B              | METTL11B | 0.808974 | 6.5     |
| ENSGALT0000 methyltransferase like 13               | METTL13  | 0.928756 | 633.5   |
| ENSGALT0000 methyltransferase like 14               | METTL14  | 0.981572 | 1231.5  |
| ENSGALT0000 methyltransferase like 15               | METTL15  | 0.995725 | 159.5   |
| ENSGALT0000 methyltransferase like 16               | METTL16  | 0.962862 | 771     |
| ENSGALT0000 methyltransferase like 19               | METTL19  | 0.924324 | 285.5   |
| ENSGALT0000 methyltransferase like 20               | METTL20  | 0.971233 | 241.5   |
| ENSGALT0000 methyltransferase like 21A              | METTL21A | 0.846106 | 396     |
| ENSGALT0000 methyltransferase like 21C              | METTL21C | 0.933985 | 178     |
| ENSGALT0000 methyltransferase like 21D              | METTL21D | 0.898131 | 421     |
| ENSGALT0000 methyltransferase like 22               | METTL22  | 0.962279 | 443.501 |
| ENSGALT0000 methyltransferase like 23               | METTL23  | 0.88212  | 389.5   |
| ENSGALT0000 methyltransferase like 2A               | METTL2A  | 0.940506 | 639     |
| ENSGALT0000 methyltransferase like 4                | METTL4   | 0.984071 | 138     |
| ENSGALT0000 methyltransferase like 5                | METTL5   | 0.913746 | 733.133 |
| ENSGALT0000 methyltransferase like 6                | METTL6   | 0.985346 | 478.5   |
| ENSGALT0000 methyltransferase like 7A               | METTL7A  | 0.913369 | 277.368 |
| ENSGALT0000 methyltransferase like 8                | METTL8   | 0.997045 | 73.5    |
| ENSGALT0000 methyltransferase like 9                | METTL9   | 0.99537  | 1960    |
| ENSGALT0000 mex-3 homolog A (C. elegans)            | MEX3A    | 0.947389 | 3400    |
| ENSGALT0000 mex-3 homolog B (C. elegans)            | MEX3B    | 0.859631 | 3913.5  |
| ENSGALT0000 mex-3 homolog D (C. elegans)            | MEX3D    | 0.841363 | 1192.45 |
| ENSGALT0000 microfibrillar-associated protein 1     | MFAP1    | 0.387646 | 716.5   |
| ENSGALT0000 microfibrillar-associated protein 3     | MFAP3    | 0.950122 | 4161    |
| ENSGALT0000 microfibrillar-associated protein 3-li  | MFAP3L   | 0.917638 | 114     |
| ENSGALT0000 microfibrillar associated protein 5     | MFAP5    | 0.555373 | 12      |
| ENSGALT0000 mitochondrial fission factor            | MFF      | 0.916839 | 430.5   |
| ENSGALT0000 milk fat globule-EGF factor 8 protei    | MFGE8    | 0.828089 | 773     |
| ENSGALT0000 antigen p97 (melanoma associated        | MFI2     | 0.990089 | 307.5   |
| ENSGALT0000 mitofusin 1                             | MFN1     | 0.949517 | 1867.47 |
| ENSGALT0000 mitofusin 2                             | MFN2     | 0.950708 | 1489    |
| ENSGALT0000 MFNG O-fucosylpeptide 3-beta-N-ε        | MFNG     | 0.987025 | 12      |
| ENSGALT0000 major facilitator superfamily domair    | MFSD1    | 0.933582 | 1312.01 |
| ENSGALT0000 major facilitator superfamily domair    | MFSD10   | 0.960161 | 851     |
| ENSGALT0000 major facilitator superfamily domair    | MFSD11   | 0.981348 | 823     |
| ENSGALT0000 major facilitator superfamily domair    | MFSD12   | 0.973994 | 656.5   |
| ENSGALT0000 major facilitator superfamily domair    | MFSD2A   | 0.850252 | 1640.5  |
| ENSGALT0000 major facilitator superfamily domair    | MFSD2B   | 0.884391 | 4       |

|                                                                      |          |         |
|----------------------------------------------------------------------|----------|---------|
| ENSGALT0000 major facilitator superfamily domain MFSD4               | 0.934421 | 436     |
| ENSGALT0000 major facilitator superfamily domain MFSD5               | 0.859505 | 1268.95 |
| ENSGALT0000 major facilitator superfamily domain MFSD6               | 0.931141 | 919     |
| ENSGALT0000 major facilitator superfamily domain MFSD7               | 0.931551 | 122.5   |
| ENSGALT0000 major facilitator superfamily domain MFSD8               | 0.961517 | 210.5   |
| ENSGALT0000 major facilitator superfamily domain MFSD9               | 0.97032  | 446.5   |
| ENSGALT0000 MAX gene associated MGA                                  | 0.98861  | 842     |
| ENSGALT0000 \N MGAT3                                                 | 0.950147 | 1910    |
| ENSGALT0000 mannosyl (alpha-1,3-)-glycoprotein MGAT4A                | 0.914653 | 333     |
| ENSGALT0000 mannosyl (alpha-1,3-)-glycoprotein MGAT4B                | 0.906751 | 3790.5  |
| ENSGALT0000 mannosyl (alpha-1,3-)-glycoprotein MGAT4C                | 0.880181 | 191     |
| ENSGALT0000 mannosyl (alpha-1,6-)-glycoprotein MGAT5                 | 0.949729 | 1013.5  |
| ENSGALT0000 mannosyl (alpha-1,6-)-glycoprotein MGAT5B                | 0.69951  | 2102.02 |
| ENSGALT0000 meningioma expressed antigen 5 (IMGEA5                   | 0.986286 | 6052.42 |
| ENSGALT0000 monoglyceride lipase MGLL                                | 0.84858  | 213.5   |
| ENSGALT0000 O-6-methylguanine-DNA methyltransferase MGMT             | 0.919729 | 520     |
| ENSGALT0000 matrix Gla protein MGP                                   | 0.437769 | 63      |
| ENSGALT0000 mahogunin, ring finger 1 MGRN1                           | 0.862192 | 3534.43 |
| ENSGALT0000 microsomal glutathione S-transferase MGST1               | 0.969324 | 1003.5  |
| ENSGALT0000 microsomal glutathione S-transferase MGST2               | 0.77378  | 18.5    |
| ENSGALT0000 microsomal glutathione S-transferase MGST3               | 0.635915 | 2129.45 |
| ENSGALT0000 melanoma inhibitory activity family, MIA3                | 0.977114 | 2057.5  |
| ENSGALT0000 mindbomb homolog 1 (Drosophila) MIB1                     | 0.937527 | 5136    |
| ENSGALT0000 mindbomb homolog 2 (Drosophila) MIB2                     | 0.978029 | 1494.49 |
| ENSGALT0000 microtubule associated monoxygenase MICAL1               | 0.991761 | 300     |
| ENSGALT0000 microtubule associated monoxygenase MICAL2               | 0.978451 | 72.5    |
| ENSGALT0000 microtubule associated monoxygenase MICAL3               | 0.976344 | 990.5   |
| ENSGALT0000 MICAL C-terminal like MICALCL                            | 0.951468 | 6       |
| ENSGALT0000 MICAL-like 1 MICALL1                                     | 0.937948 | 3318.45 |
| ENSGALT0000 MICAL-like 2 MICALL2                                     | 0.962122 | 462.5   |
| ENSGALT0000 mitochondrial calcium uptake 1 MICU1                     | 0.784739 | 1311.24 |
| ENSGALT0000 midline 1 (Opitz/BBB syndrome) MID1                      | 0.946589 | 1745.49 |
| ENSGALT0000 MID1 interacting protein 1 (gastrula) MID1IP1            | 0.272958 | 1159.5  |
| ENSGALT0000 mesoderm induction early response gene MIER1             | 0.989568 | 711     |
| ENSGALT0000 mesoderm induction early response gene MIER2             | 0.978779 | 775     |
| ENSGALT0000 mesoderm induction early response gene MIER3             | 0.985282 | 251.137 |
| ENSGALT0000 Macrophage migration inhibitory factor MIF               | 0.65795  | 14226.7 |
| ENSGALT0000 migration and invasion inhibitory protein MIIP           | 0.945313 | 116.121 |
| ENSGALT0000 mast cell immunoglobulin-like receptor MILR1             | 0.988176 | 153     |
| ENSGALT0000 MYC induced nuclear antigen MINA                         | 0.98085  | 1080.23 |
| ENSGALT0000 mitochondrial inner membrane organellar protein MINOS1   | 0.193716 | 1143    |
| ENSGALT0000 multiple inositol-polyphosphate phosphatase MINPP1       | 0.955446 | 529.003 |
| ENSGALT0000 missing oocyte, meiosis regulator, 1 MIOS                | 0.978604 | 933.5   |
| ENSGALT0000 mitochondrial intermediate peptidase MIPEP               | 0.976416 | 1412.5  |
| ENSGALT0000 mirror-image polydactyly 1 MIPOL1                        | 0.955164 | 155.5   |
| ENSGALT0000 MIS12, MIND kinetochore complex MIS12                    | 0.873291 | 331.5   |
| ENSGALT0000 MIS18 kinetochore protein homolog MIS18A                 | 0.790514 | 561.002 |
| ENSGALT0000 MIS18 binding protein 1 MIS18BP1                         | 0.977532 | 785     |
| ENSGALT0000 MIT, microtubule interacting and transport protein MITD1 | 0.988051 | 279     |
| ENSGALT0000 microphthalmia-associated transcription factor MITF      | 0.959534 | 526.501 |
| ENSGALT0000 Mix paired-like homeobox MIXL1                           | 0.135054 | 13.5    |
| ENSGALT0000 MKI67 (FHA domain) interacting nuclear protein MKI67IP   | 0.837212 | 1965    |
| ENSGALT0000 McKusick-Kaufman syndrome MKKS                           | 0.961006 | 731.5   |
| ENSGALT0000 megakaryoblastic leukemia (transcript) MKL1              | 0.928687 | 1608.5  |
| ENSGALT0000 MKL/myocardin-like 2 MKL2                                | 0.983685 | 656.5   |
| ENSGALT0000 muskelin 1, intracellular mediator of signaling MKLN1    | 0.961737 | 1053.5  |

|                                                                          |        |            |         |
|--------------------------------------------------------------------------|--------|------------|---------|
| ENSGALT0000 MAP kinase interacting serine/threosine kinase 1             | MKNK1  | 0.90874    | 75      |
| ENSGALT0000 MAP kinase interacting serine/threosine kinase 2             | MKNK2  | 0.921744   | 574.5   |
| ENSGALT0000 makorin ring finger protein 1                                | MKRN1  | 0.963999   | 4532    |
| ENSGALT0000 makorin ring finger protein 2                                | MKRN2  | 0.964997   | 951.5   |
| ENSGALT0000 Meckel syndrome, type 1                                      | MKS1   | 0.953143   | 774     |
| ENSGALT0000 mohawk homeobox                                              | MKX    | 0.992899   | 55.5    |
| ENSGALT0000 melan-A                                                      | MLANA  | 0.464758   | 0       |
| ENSGALT0000 megalencephalic leukoencephalopathy with subcortical cysts 1 | MLC1   | 0.636572   | 1.5     |
| ENSGALT0000 malectin                                                     | MLEC   | 0.95083    | 928.5   |
| ENSGALT0000 myeloid leukemia factor 1                                    | MLF1   | 0.909492   | 750.001 |
| ENSGALT0000 MLF1 interacting protein                                     | MLF1IP | 0.987875   | 167.826 |
| ENSGALT0000 myeloid leukemia factor 2                                    | MLF2   | 0.774214   | 5106    |
| ENSGALT0000 mutL homolog 1, colon cancer, non-refractory                 | MLH1   | 0.950117   | 449     |
| ENSGALT0000 mutL homolog 3 (E. coli)                                     | MLH3   | 0.971976   | 1028.5  |
| ENSGALT0000 muscular LMNA-interacting protein                            | MLIP   | 0.00511917 | 0       |
| ENSGALT0000 mixed lineage kinase domain-like protein 1                   | MLKL   | 0.749343   | 2.5     |
| ENSGALT0000 myeloid/lymphoid or mixed-lineage leukemia 2                 | MLL2   | 0.985286   | 933     |
| ENSGALT0000 myeloid/lymphoid or mixed-lineage leukemia 3                 | MLL3   | 0.994618   | 5989    |
| ENSGALT0000 myeloid/lymphoid or mixed-lineage leukemia 5                 | MLL5   | 0.998347   | 8839    |
| ENSGALT0000 myeloid/lymphoid or mixed-lineage leukemia 11                | MLLT1  | 0.954793   | 1333.5  |
| ENSGALT0000 myeloid/lymphoid or mixed-lineage leukemia 10                | MLLT10 | 0.984008   | 1189    |
| ENSGALT0000 myeloid/lymphoid or mixed-lineage leukemia 13                | MLLT3  | 0.972416   | 647     |
| ENSGALT0000 myeloid/lymphoid or mixed-lineage leukemia 14                | MLLT4  | 0.970974   | 3382.49 |
| ENSGALT0000 myeloid/lymphoid or mixed-lineage leukemia 6                 | MLLT6  | 0.960192   | 853     |
| ENSGALT0000 Motilin                                                      | MLN    | 0.464758   | 0       |
| ENSGALT0000 melanophilin                                                 | MLPH   | 0.82004    | 2       |
| ENSGALT0000 MTOR associated protein, LST8 homolog                        | MLST8  | 0.823229   | 2396.5  |
| ENSGALT0000 MAX-like protein X                                           | MLX    | 0.966688   | 2020.5  |
| ENSGALT0000 MLX interacting protein                                      | MLXIP  | 0.902508   | 712     |
| ENSGALT0000 MLX interacting protein-like                                 | MLXIPL | 0.951167   | 83      |
| ENSGALT0000 methylmalonic aciduria (cobalamin deficiency) type 1         | MMAA   | 0.996678   | 190.5   |
| ENSGALT0000 methylmalonic aciduria (cobalamin deficiency) type 2         | MMAB   | 0.92677    | 141.5   |
| ENSGALT0000 methylmalonic aciduria (cobalamin deficiency) type 3         | MMACHC | 0.966923   | 134     |
| ENSGALT0000 methylmalonic aciduria (cobalamin deficiency) type 4         | MMADHC | 0.983144   | 2299.5  |
| ENSGALT0000 monocyte to macrophage differentiation 1                     | MMD    | 0.701409   | 3156.5  |
| ENSGALT0000 monocyte to macrophage differentiation 2                     | MMD2   | 0.582503   | 1582    |
| ENSGALT0000 membrane metallo-endopeptidase                               | MME    | 0.644098   | 87      |
| ENSGALT0000 membrane metallo-endopeptidase-1                             | MMEL1  | 0.642873   | 35.5    |
| ENSGALT0000 membrane magnesium transporter                               | MMGT1  | 0.924339   | 277     |
| ENSGALT0000 matrix metalloproteinase 1 (interstitial)                    | MMP1   | 0.671151   | 0.5     |
| ENSGALT0000 matrix metalloproteinase 11 (stromal)                        | MMP11  | 0.935741   | 1400.7  |
| ENSGALT0000 matrix metalloproteinase 13 (collagenase)                    | MMP13  | 0.892475   | 2.5     |
| ENSGALT0000 matrix metalloproteinase 15 (membrane)                       | MMP15  | 0.785181   | 4277    |
| ENSGALT0000 matrix metalloproteinase 16 (membrane)                       | MMP16  | 0.994694   | 914.001 |
| ENSGALT0000 matrix metalloproteinase 17 (membrane)                       | MMP17  | 0.713382   | 757.5   |
| ENSGALT0000 matrix metalloproteinase 2 (gelatinase)                      | MMP2   | 0.971637   | 3413    |
| ENSGALT0000 matrix metalloproteinase 23B                                 | MMP23B | 0.951116   | 22.5    |
| ENSGALT0000 matrix metalloproteinase 24 (membrane)                       | MMP24  | 0.964284   | 869     |
| ENSGALT0000 matrix metalloproteinase 27                                  | MMP27  | 0.331575   | 0       |
| ENSGALT0000 matrix metalloproteinase 28                                  | MMP28  | 0.523405   | 57      |
| ENSGALT0000 matrix metalloproteinase 3 (stromal)                         | MMP3   | 0.464758   | 0       |
| ENSGALT0000 matrix metalloproteinase 7 (matrilysin)                      | MMP7   | 0.464758   | 0       |
| ENSGALT0000 matrix metalloproteinase 9 (gelatinase)                      | MMP9   | 0.510784   | 9       |
| ENSGALT0000 multimerin 1                                                 | MMRN1  | 0.682978   | 41      |
| ENSGALT0000 multimerin 2                                                 | MMRN2  | 0.781102   | 89.5    |
| ENSGALT0000 MMS19 nucleotide excision repair factor 1                    | MMS19  | 0.922653   | 2521    |

|                                                        |           |          |         |
|--------------------------------------------------------|-----------|----------|---------|
| ENSGALT0000 MMS22-like, DNA repair protein             | MMS22L    | 0.95523  | 345     |
| ENSGALT0000 menage a trois homolog 1, cyclin H         | MNAT1     | 0.947154 | 975.001 |
| ENSGALT0000 meiotic nuclear divisions 1 homolog        | MND1      | 0.863817 | 567     |
| ENSGALT0000 MAX binding protein                        | MNT       | 0.845098 | 668.5   |
| ENSGALT0000 motor neuron and pancreas homeobox         | MXN1      | 0.698763 | 1.01634 |
| ENSGALT0000 MOB kinase activator 2                     | MOB2      | 0.830506 | 497     |
| ENSGALT0000 MOB kinase activator 3B                    | MOB3B     | 0.883496 | 24.5    |
| ENSGALT0000 MOB kinase activator 3C                    | MOB3C     | 0.256868 | 125     |
| ENSGALT0000 MOB family member 4, phocein               | MOB4      | 0.927767 | 1553.12 |
| ENSGALT0000 MOB1, Mps One Binder kinase activator      | MOBK1A    | 0.983044 | 340     |
| ENSGALT0000 molybdenum cofactor sulfurase              | MOCOS     | 0.951419 | 28.5    |
| ENSGALT0000 molybdenum cofactor synthesis 1            | MOCS1     | 0.997445 | 786.501 |
| ENSGALT0000 molybdenum cofactor synthesis 2            | MOCS2     | 0.883713 | 317     |
| ENSGALT0000 molybdenum cofactor synthesis 3            | MOCS3     | 0.644815 | 554.5   |
| ENSGALT0000 monoacylglycerol O-acyltransferase 1       | MOGAT1    | 0.95383  | 120     |
| ENSGALT0000 monoacylglycerol O-acyltransferase 2       | MOGAT2    | 0.987496 | 8.5     |
| ENSGALT0000 MON1 homolog A (yeast)                     | MON1A     | 0.939355 | 941     |
| ENSGALT0000 MON2 homolog ( <i>S. cerevisiae</i> )      | MON2      | 0.993569 | 2055.98 |
| ENSGALT0000 MORC family CW-type zinc finger 2          | MORC2     | 0.971924 | 2235    |
| ENSGALT0000 MORC family CW-type zinc finger 3          | MORC3     | 0.985435 | 1249.5  |
| ENSGALT0000 mortality factor 4 like 1                  | MORF4L1   | 0.929889 | 2543.47 |
| ENSGALT0000 MORN repeat containing 2                   | MORN2     | 0.900359 | 20.5    |
| ENSGALT0000 MORN repeat containing 3                   | MORN3     | 0.952712 | 34.5    |
| ENSGALT0000 MORN repeat containing 4                   | MORN4     | 0.759369 | 2892.5  |
| ENSGALT0000 MORN repeat containing 5                   | MORN5     | 0.865449 | 275.5   |
| ENSGALT0000 v-mos Moloney murine sarcoma virus         | MOS       | 0.286122 | 1.5     |
| ENSGALT0000 motile sperm domain containing 1           | MOSPD1    | 0.939484 | 1158.5  |
| ENSGALT0000 motile sperm domain containing 2           | MOSPD2    | 0.998217 | 351     |
| ENSGALT0000 Mov10, Moloney leukemia virus 10           | MOV10     | 0.798364 | 254.5   |
| ENSGALT0000 Mov10l1, Moloney leukemia virus 10         | MOV10L1   | 0.683151 | 62.0001 |
| ENSGALT0000 monooxygenase, DBH-like 1                  | MOXD1     | 0.738208 | 1629.5  |
| ENSGALT0000 multiple PDZ domain protein                | MPDZ      | 0.981876 | 2253.5  |
| ENSGALT0000 N-methylpurine-DNA glycosylase             | MPG       | 0.88574  | 301     |
| ENSGALT0000 M-phase phosphoprotein 10 (U3 snRNP)       | MPHOSPH10 | 0.949739 | 575.5   |
| ENSGALT0000 M-phase phosphoprotein 6                   | MPHOSPH6  | 0.97535  | 609     |
| ENSGALT0000 M-phase phosphoprotein 8                   | MPHOSPH8  | 0.966969 | 684     |
| ENSGALT0000 M-phase phosphoprotein 9                   | MPHOSPH9  | 0.939239 | 356.5   |
| ENSGALT0000 myeloproliferative leukemia virus oncogene | MPL       | 0.902613 | 65.5    |
| ENSGALT0000 myeloperoxidase                            | MPO       | 0.976206 | 23.5    |
| ENSGALT0000 membrane protein, palmitoylated 1          | MPP1      | 0.910032 | 2102    |
| ENSGALT0000 membrane protein, palmitoylated 2          | MPP2      | 0.899632 | 1109.5  |
| ENSGALT0000 membrane protein, palmitoylated 3          | MPP3      | 0.802571 | 205.5   |
| ENSGALT0000 membrane protein, palmitoylated 4          | MPP4      | 0.929999 | 203     |
| ENSGALT0000 membrane protein, palmitoylated 5          | MPP5      | 0.978992 | 492     |
| ENSGALT0000 membrane protein, palmitoylated 6          | MPP6      | 0.972097 | 908.5   |
| ENSGALT0000 membrane protein, palmitoylated 7          | MPP7      | 0.933078 | 472     |
| ENSGALT0000 metallophosphoesterase 1                   | MPPE1     | 0.983304 | 547     |
| ENSGALT0000 metallophosphoesterase domain containing 1 | MPPED1    | 0.971407 | 548.5   |
| ENSGALT0000 metallophosphoesterase domain containing 2 | MPPED2    | 0.918838 | 1001.5  |
| ENSGALT0000 myosin phosphatase Rho interacting protein | MPRIP     | 0.917707 | 5444.5  |
| ENSGALT0000 mercaptopyruvate sulfurtransferase         | MPST      | 0.804497 | 1008.23 |
| ENSGALT0000 myelin protein zero-like 1                 | MPZL1     | 0.950046 | 640     |
| ENSGALT0000 myelin protein zero-like 2                 | MPZL2     | 0.942933 | 1206.01 |
| ENSGALT0000 myelin protein zero-like 3                 | MPZL3     | 0.959326 | 1875.55 |
| ENSGALT0000 major histocompatibility complex, class II | MR1       | 0.455953 | 121.605 |
| ENSGALT0000 melanocortin 2 receptor accessory protein  | MRAP2     | 0.555607 | 9.5     |

|                                                  |        |          |         |
|--------------------------------------------------|--------|----------|---------|
| ENSGALT0000 muscle RAS oncogene homolog          | MRAS   | 0.921491 | 300     |
| ENSGALT0000 mannose receptor, C type 2           | MRC2   | 0.973682 | 5981    |
| ENSGALT0000 MRE11 meiotic recombination 11 h     | MRE11A | 0.980509 | 987.495 |
| ENSGALT0000 melanoregulin                        | MREG   | 0.959644 | 167     |
| ENSGALT0000 mitochondrial rRNA methyltransferase | MRM1   | 0.866349 | 273     |
| ENSGALT0000 mitochondrial ribosomal protein 63   | MRP63  | 0.384689 | 1130.5  |
| ENSGALT0000 mitochondrial ribosomal protein L1   | MRPL1  | 0.781128 | 710     |
| ENSGALT0000 mitochondrial ribosomal protein L10  | MRPL10 | 0.729287 | 2414.5  |
| ENSGALT0000 mitochondrial ribosomal protein L11  | MRPL11 | 0.288357 | 3538.5  |
| ENSGALT0000 mitochondrial ribosomal protein L12  | MRPL12 | 0.947699 | 746.494 |
| ENSGALT0000 mitochondrial ribosomal protein L13  | MRPL13 | 0.813746 | 954     |
| ENSGALT0000 mitochondrial ribosomal protein L14  | MRPL14 | 0.600008 | 903.5   |
| ENSGALT0000 mitochondrial ribosomal protein L15  | MRPL15 | 0.681187 | 1691    |
| ENSGALT0000 mitochondrial ribosomal protein L16  | MRPL16 | 0.417108 | 2919.5  |
| ENSGALT0000 mitochondrial ribosomal protein L17  | MRPL17 | 0.507156 | 1019.5  |
| ENSGALT0000 mitochondrial ribosomal protein L18  | MRPL18 | 0.827407 | 739.251 |
| ENSGALT0000 mitochondrial ribosomal protein L19  | MRPL19 | 0.263906 | 2944    |
| ENSGALT0000 mitochondrial ribosomal protein L2   | MRPL2  | 0.288712 | 2374    |
| ENSGALT0000 mitochondrial ribosomal protein L20  | MRPL20 | 0.849346 | 572.5   |
| ENSGALT0000 mitochondrial ribosomal protein L21  | MRPL21 | 0.913425 | 567.5   |
| ENSGALT0000 mitochondrial ribosomal protein L22  | MRPL22 | 0.688925 | 1450.5  |
| ENSGALT0000 mitochondrial ribosomal protein L23  | MRPL23 | 0.47995  | 1097.5  |
| ENSGALT0000 mitochondrial ribosomal protein L24  | MRPL24 | 0.382113 | 1103    |
| ENSGALT0000 mitochondrial ribosomal protein L25  | MRPL25 | 0.324188 | 2254.52 |
| ENSGALT0000 mitochondrial ribosomal protein L26  | MRPL26 | 0.862988 | 1359.5  |
| ENSGALT0000 mitochondrial ribosomal protein L27  | MRPL27 | 0.762246 | 595     |
| ENSGALT0000 mitochondrial ribosomal protein L28  | MRPL28 | 0.725097 | 558     |
| ENSGALT0000 mitochondrial ribosomal protein L29  | MRPL29 | 0.740813 | 337.5   |
| ENSGALT0000 mitochondrial ribosomal protein L3   | MRPL3  | 0.621667 | 574.5   |
| ENSGALT0000 mitochondrial ribosomal protein L30  | MRPL30 | 0.954421 | 1144.99 |
| ENSGALT0000 mitochondrial ribosomal protein L31  | MRPL31 | 0.826201 | 1368    |
| ENSGALT0000 mitochondrial ribosomal protein L32  | MRPL32 | 0.846354 | 497.5   |
| ENSGALT0000 mitochondrial ribosomal protein L33  | MRPL33 | 0.773752 | 974     |
| ENSGALT0000 mitochondrial ribosomal protein L34  | MRPL34 | 0.895918 | 861     |
| ENSGALT0000 mitochondrial ribosomal protein L35  | MRPL35 | 0.786143 | 2026.5  |
| ENSGALT0000 mitochondrial ribosomal protein L36  | MRPL36 | 0.826734 | 814.5   |
| ENSGALT0000 mitochondrial ribosomal protein L37  | MRPL37 | 0.678041 | 752.5   |
| ENSGALT0000 mitochondrial ribosomal protein L38  | MRPL38 | 0.639646 | 199.556 |
| ENSGALT0000 mitochondrial ribosomal protein L39  | MRPL39 | 0.828934 | 1065    |
| ENSGALT0000 mitochondrial ribosomal protein L4   | MRPL4  | 0.606161 | 817.5   |
| ENSGALT0000 mitochondrial ribosomal protein L40  | MRPL40 | 0.407269 | 1381    |
| ENSGALT0000 mitochondrial ribosomal protein L41  | MRPL41 | 0.698798 | 513     |
| ENSGALT0000 mitochondrial ribosomal protein L42  | MRPL42 | 0.879843 | 481.5   |
| ENSGALT0000 mitochondrial ribosomal protein L43  | MRPL43 | 0.658188 | 1744.5  |
| ENSGALT0000 mitochondrial ribosomal protein L44  | MRPL44 | 0.36488  | 1031    |
| ENSGALT0000 mitochondrial ribosomal protein L45  | MRPL45 | 0.359244 | 1670    |
| ENSGALT0000 mitochondrial ribosomal protein L46  | MRPL46 | 0.400075 | 745.5   |
| ENSGALT0000 mitochondrial ribosomal protein L47  | MRPL47 | 0.941531 | 1468    |
| ENSGALT0000 mitochondrial ribosomal protein L48  | MRPL48 | 0.891914 | 994     |
| ENSGALT0000 mitochondrial ribosomal protein L49  | MRPL49 | 0.70509  | 346.5   |
| ENSGALT0000 mitochondrial ribosomal protein L5   | MRPL5  | 0.19864  | 1682.5  |
| ENSGALT0000 mitochondrial ribosomal protein L50  | MRPL50 | 0.818488 | 635.5   |
| ENSGALT0000 mitochondrial ribosomal protein L51  | MRPL51 | 0.808982 | 1179.5  |
| ENSGALT0000 mitochondrial ribosomal protein L52  | MRPL52 | 0.7911   | 902     |
| ENSGALT0000 mitochondrial ribosomal protein L53  | MRPL53 | 0.599769 | 1316.73 |
| ENSGALT0000 mitochondrial ribosomal protein S1   | MRPS1  | 0.81941  | 664.5   |
| ENSGALT0000 mitochondrial ribosomal protein S10  | MRPS10 |          |         |
| ENSGALT0000 mitochondrial ribosomal protein S11  | MRPS11 |          |         |
| ENSGALT0000 mitochondrial ribosomal protein S12  | MRPS12 |          |         |
| ENSGALT0000 mitochondrial ribosomal protein S13  | MRPS13 |          |         |
| ENSGALT0000 mitochondrial ribosomal protein S14  | MRPS14 |          |         |
| ENSGALT0000 mitochondrial ribosomal protein S15  | MRPS15 |          |         |
| ENSGALT0000 mitochondrial ribosomal protein S16  | MRPS16 |          |         |
| ENSGALT0000 mitochondrial ribosomal protein S17  | MRPS17 |          |         |
| ENSGALT0000 mitochondrial ribosomal protein S18  | MRPS18 |          |         |
| ENSGALT0000 mitochondrial ribosomal protein S19  | MRPS19 |          |         |
| ENSGALT0000 mitochondrial ribosomal protein S2   | MRPS2  |          |         |
| ENSGALT0000 mitochondrial ribosomal protein S20  | MRPS20 |          |         |
| ENSGALT0000 mitochondrial ribosomal protein S21  | MRPS21 |          |         |
| ENSGALT0000 mitochondrial ribosomal protein S22  | MRPS22 |          |         |
| ENSGALT0000 mitochondrial ribosomal protein S23  | MRPS23 |          |         |
| ENSGALT0000 mitochondrial ribosomal protein S24  | MRPS24 |          |         |
| ENSGALT0000 mitochondrial ribosomal protein S25  | MRPS25 |          |         |
| ENSGALT0000 mitochondrial ribosomal protein S26  | MRPS26 |          |         |
| ENSGALT0000 mitochondrial ribosomal protein S27  | MRPS27 |          |         |

|                                                                   |         |           |         |
|-------------------------------------------------------------------|---------|-----------|---------|
| ENSGALT0000 mitochondrial ribosomal protein S2                    | MRPS28  | 0.396293  | 731     |
| ENSGALT0000 mitochondrial ribosomal protein S3                    | MRPS30  | 0.777568  | 747.5   |
| ENSGALT0000 mitochondrial ribosomal protein S3                    | MRPS31  | 0.9249    | 139     |
| ENSGALT0000 mitochondrial ribosomal protein S3                    | MRPS33  | 0.885345  | 1115.5  |
| ENSGALT0000 mitochondrial ribosomal protein S3                    | MRPS34  | 0.675652  | 983     |
| ENSGALT0000 mitochondrial ribosomal protein S3                    | MRPS35  | 0.832325  | 566     |
| ENSGALT0000 mitochondrial ribosomal protein S3                    | MRPS36  | 0.640071  | 218     |
| ENSGALT0000 mitochondrial ribosomal protein S5                    | MRPS5   | 0.922749  | 908.5   |
| ENSGALT0000 hypothetical protein LOC427978                        | MRPS6   | 0.973686  | 530     |
| ENSGALT0000 mitochondrial ribosomal protein S7                    | MRPS7   | 0.947353  | 1731.5  |
| ENSGALT0000 mitochondrial ribosomal protein S9                    | MRPS9   | 0.85909   | 920.5   |
| ENSGALT0000 mitochondrial ribosome recycling factor               | MRRF    | 0.938343  | 850.5   |
| ENSGALT0000 MRS2 magnesium homeostasis factor                     | MRS2    | 0.971262  | 222.5   |
| ENSGALT0000 mRNA turnover 4 homolog (S. cerevisiae)               | MRTO4   | 0.731516  | 1565.9  |
| ENSGALT0000 murine retrovirus integration site 1                  | MRVI1   | 0.94646   | 145     |
| ENSGALT0000 myosin VIIA                                           | MSC     | 0.56009   | 842.5   |
| ENSGALT0000 mesogenin 1                                           | MSGN1   | 0.0741325 | 3       |
| ENSGALT0000 mutS homolog 2, colon cancer, non-polyoma             | MSH2    | 0.88012   | 2592.53 |
| ENSGALT0000 mutS homolog 4 (E. coli)                              | MSH4    | 0.999172  | 739     |
| ENSGALT0000 mutS homolog 6 (E. coli)                              | MSH6    | 0.904978  | 2659.5  |
| ENSGALT0000 musashi homolog 1 (Drosophila)                        | MSI1    | 0.961967  | 4317.91 |
| ENSGALT0000 musashi homolog 2 (Drosophila)                        | MSI2    | 0.934537  | 1713    |
| ENSGALT0000 male-specific lethal 1 homolog (Drosophila)           | MSL1    | 0.939381  | 1918.5  |
| ENSGALT0000 male-specific lethal 2 homolog (Drosophila)           | MSL2    | 0.967272  | 470     |
| ENSGALT0000 male-specific lethal 3 homolog (Drosophila)           | MSL3    | 0.928353  | 826.5   |
| ENSGALT0000 mesothelin                                            | MSLN    | 0.90056   | 46      |
| ENSGALT0000 mesothelin-like                                       | MSLNL   | ?         | 0       |
| ENSGALT0000 microseminoprotein, beta                              | MSMB    | ?         | 0       |
| ENSGALT0000 methionine sulfoxide reductase A                      | MSRA    | 0.835256  | 69      |
| ENSGALT0000 methionine sulfoxide reductase B3                     | MSRB3   | 0.985248  | 192     |
| ENSGALT0000 macrophage stimulating 1 (hepatocellular carcinoma)   | MST1    | 0.9112    | 918.997 |
| ENSGALT0000 macrophage stimulating 1 receptor                     | MST1R   | 0.889756  | 21.5    |
| ENSGALT0000 serine/threonine protein kinase                       | MST4    | 0.99916   | 2849    |
| ENSGALT0000 myostatin                                             | MSTN    | 0.936231  | 55.9849 |
| ENSGALT0000 misato homolog 1 (Drosophila)                         | MSTO1   | 0.911709  | 589     |
| ENSGALT0000 msh homeobox 1                                        | MSX1    | 0.340794  | 3782.6  |
| ENSGALT0000 msh homeobox 2                                        | MSX2    | 0.691367  | 21.2412 |
| ENSGALT0000 metastasis associated 1                               | MTA1    | 0.984511  | 2759.05 |
| ENSGALT0000 metastasis associated 1 family, member 3              | MTA3    | 0.981743  | 1108    |
| ENSGALT0000 methylthioadenosine phosphorylase                     | MTAP    | 0.999148  | 758.5   |
| ENSGALT0000 Mdm2, transformed 3T3 cell double-strand break repair | MTBP    | 0.978694  | 292     |
| ENSGALT0000 mitochondrial carrier 1                               | MTCH1   | 0.956769  | 488     |
| ENSGALT0000 mitochondrial carrier homolog 2                       | MTCH2   | 0.500107  | 1994    |
| ENSGALT0000 metadherin                                            | MTDH    | 0.980536  | 1827.04 |
| ENSGALT0000 MTERF domain containing 1                             | MTERFD1 | 0.88141   | 746.5   |
| ENSGALT0000 MTERF domain containing 3                             | MTERFD3 | 0.931429  | 41      |
| ENSGALT0000 metal-regulatory transcription factor 1               | MTF1    | 0.984858  | 316     |
| ENSGALT0000 metal response element binding transcription factor 2 | MTF2    | 0.935362  | 2188    |
| ENSGALT0000 mitochondrial methionyl-tRNA form                     | MTFMT   | 0.862413  | 324     |
| ENSGALT0000 mitochondrial fission process 1                       | MTFP1   | 0.254196  | 163.5   |
| ENSGALT0000 mitochondrial fission regulator 1                     | MTRF1   | 0.928334  | 2563.52 |
| ENSGALT0000 methylenetetrahydrofolate dehydrogenase 1             | MTHFD1  | 0.965274  | 1520    |
| ENSGALT0000 methylenetetrahydrofolate dehydrogenase 1L            | MTHFD1L | 0.835093  | 364.5   |
| ENSGALT0000 methylene tetrahydrofolate dehydrogenase 2            | MTHFD2  | 0.746601  | 645.497 |
| ENSGALT0000 methylenetetrahydrofolate dehydrogenase 2L            | MTHFD2L | 0.865381  | 108     |
| ENSGALT0000 Methylenetetrahydrofolate reductase                   | MTHFR   | 0.945037  | 1229    |

|                                                    |            |          |         |
|----------------------------------------------------|------------|----------|---------|
| ENSGALT0000 5,10-methenyltetrahydrofolate synt     | MTHFS      | 0.973804 | 381.5   |
| ENSGALT0000 methenyltetrahydrofolate synthetas     | MTHFSD     | 0.862716 | 288     |
| ENSGALT0000 mitochondrial translational initiation | MTIF2      | 0.961185 | 1048.5  |
| ENSGALT0000 mitochondrial translational initiation | MTIF3      | 0.943391 | 245     |
| ENSGALT0000 myotubularin 1                         | MTM1       | 0.9729   | 378.5   |
| ENSGALT0000 myotubularin related protein 1         | MTMR1      | 0.98789  | 1532    |
| ENSGALT0000 myotubularin related protein 10        | MTMR10     | 0.970094 | 943     |
| ENSGALT0000 myotubularin related protein 12        | MTMR12     | 0.958437 | 163     |
| ENSGALT0000 myotubularin related protein 14        | MTMR14     | 0.877785 | 982     |
| ENSGALT0000 myotubularin related protein 2         | MTMR2      | 0.925015 | 1597    |
| ENSGALT0000 myotubularin related protein 3         | MTMR3      | 0.979836 | 3698.03 |
| ENSGALT0000 myotubularin related protein 4         | MTMR4      | 0.974218 | 4517    |
| ENSGALT0000 myotubularin related protein 6         | MTMR6      | 0.964865 | 659.5   |
| ENSGALT0000 myotubularin related protein 7         | MTMR7      | 0.887545 | 225.412 |
| ENSGALT0000 myotubularin related protein 8         | MTMR8      | 0.958809 | 2009.5  |
| ENSGALT0000 myotubularin related protein 9         | MTMR9      | 0.958983 | 3089.5  |
| ENSGALT0000 myotubularin related protein 9-like,   | MTMR9LP    | 0.911506 | 231     |
| ENSGALT0000 melatonin receptor 1A                  | MTNR1A     | 0.743047 | 29      |
| ENSGALT0000 Melatonin receptor type 1B             | MTNR1B     | 0.995974 | 34      |
| ENSGALT0000 mitochondrial translation optimizati   | MTO1       | 0.950923 | 1714.47 |
| ENSGALT0000 mechanistic target of rapamycin (se    | MTOR       | 0.957781 | 2749.5  |
| ENSGALT0000 mitochondrial poly(A) polymerase       | MTPAP      | 0.903321 | 883.5   |
| ENSGALT0000 myotrophin                             | MTPN       | 0.946302 | 4515    |
| ENSGALT0000 5-methyltetrahydrofolate-homocyst      | MTR        | 0.999005 | 886.561 |
| ENSGALT0000 mitochondrial translational release    | MTRF1      | 0.945576 | 657     |
| ENSGALT0000 mitochondrial translational release    | MTRF1L     | 0.966113 | 466     |
| ENSGALT0000 5-methyltetrahydrofolate-homocyst      | MTRR       | 0.973347 | 602     |
| ENSGALT0000 metastasis suppressor 1                | MTSS1      | 0.931813 | 642.497 |
| ENSGALT0000 metastasis suppressor 1-like           | MTSS1L     | 0.889571 | 566.5   |
| ENSGALT0000 microsomal triglyceride transfer prc   | MTTP       | 0.949586 | 7.5     |
| ENSGALT0000 Mitochondrial tRNA-specific 2-thiou    | MTU1_CHICK | 0.969122 | 483.984 |
| ENSGALT0000 microtubule associated tumor supp      | MTUS1      | 0.808744 | 359     |
| ENSGALT0000 microtubule associated tumor supp      | MTUS2      | 0.782941 | 234.5   |
| ENSGALT0000 metaxin 2                              | MTX2       | 0.860638 | 1269.5  |
| ENSGALT0000 metaxin 3                              | MTX3       | 0.966117 | 441     |
| ENSGALT0000 mucin 13, cell surface associated      | MUC13      | 0.999155 | 124.5   |
| ENSGALT0000 mucin 16, cell surface associated      | MUC16      | 0.415343 | 0.5     |
| ENSGALT0000 mucin 2, oligomeric mucus/gel-form     | MUC2       | 0.851364 | 13.6482 |
| ENSGALT0000 mucin 4, cell surface associated       | MUC4       | 0.312784 | 11      |
| ENSGALT0000 ovomucin alpha-subunit                 | MUC5B      | 0.659379 | 13.5    |
| ENSGALT0000 mucin 6, oligomeric mucus/gel-form     | MUC6       | 0.164317 | 0       |
| ENSGALT0000 mucin 7, secreted                      | MUC7       | ?        | 0       |
| ENSGALT0000 MU-2/AP1M2 domain containing, d        | MUDENG     | 0.784148 | 927     |
| ENSGALT0000 mitochondrial E3 ubiquitin protein li  | MUL1       | 0.909702 | 535.5   |
| ENSGALT0000 melanoma associated antigen (mut       | MUM1       | 0.978509 | 1364.5  |
| ENSGALT0000 muscle-related coiled-coil protein     | MURC       | 0.674827 | 209.5   |
| ENSGALT0000 muscle, skeletal, receptor tyrosine    | MUSK       | 0.876569 | 13      |
| ENSGALT0000 musculoskeletal, embryonic nuclea      | MUSTN1     | 0.376367 | 6       |
| ENSGALT0000 methylmalonyl CoA mutase               | MUT        | 0.957315 | 1104    |
| ENSGALT0000 muted homolog (mouse)                  | MUTED      | 0.941836 | 834     |
| ENSGALT0000 mutY homolog (E. coli)                 | MUTYH      | 0.869754 | 486.498 |
| ENSGALT0000 mevalonate (diphospho) decarboxy       | MVD        | 0.35565  | 1608.54 |
| ENSGALT0000 major vault protein                    | MVP        | 0.97953  | 2232.01 |
| ENSGALT0000 myxovirus (influenza virus) resistan   | MX1        | 0.859236 | 8.5     |
| ENSGALT0000 MAX dimerization protein 1             | MXD1       | 0.965312 | 1390.99 |
| ENSGALT0000 MAX dimerization protein 4             | MXD4       | 0.994228 | 1183.5  |

|                                                      |         |          |         |
|------------------------------------------------------|---------|----------|---------|
| ENSGALT0000 MAX interactor 1                         | MXI1    | 0.961717 | 1125.5  |
| ENSGALT0000 matrix-remodelling associated 5          | MXRA5   | 0.989967 | 4094.5  |
| ENSGALT0000 matrix-remodelling associated 7          | MXRA7   | 0.690648 | 276     |
| ENSGALT0000 matrix-remodelling associated 8          | MXRA8   | 0.98787  | 1005    |
| ENSGALT0000 myeloid-associated differentiation r     | MYADM   | 0.773441 | 286.5   |
| ENSGALT0000 myeloid-associated differentiation r     | MYADML2 | 0.93044  | 32.5    |
| ENSGALT0000 v-myb myeloblastosis viral oncog         | MYB     | 0.935207 | 119     |
| ENSGALT0000 MYB binding protein (P160) 1a            | MYBBP1A | 0.931211 | 1709.5  |
| ENSGALT0000 v-myb myeloblastosis viral oncog         | MYBL1   | 0.989492 | 117     |
| ENSGALT0000 v-myb myeloblastosis viral oncog         | MYBL2   | 0.913906 | 2371.06 |
| ENSGALT0000 myosin binding protein C, slow type      | MYBPC1  | 0.740811 | 1.5     |
| ENSGALT0000 myosin binding protein C, cardiac        | MYBPC3  | 0.649519 | 0.5     |
| ENSGALT0000 myosin binding protein H                 | MYBPH   | 0.884004 | 54.5    |
| ENSGALT0000 v-myc myelocytomatosis viral onco        | MYC     | 0.829184 | 981.367 |
| ENSGALT0000 c-myc binding protein                    | MYCBP   | 0.898087 | 230     |
| ENSGALT0000 MYC binding protein 2                    | MYCBP2  | 0.958733 | 5614    |
| ENSGALT0000 MYCBP associated protein                 | MYCBPAP | 0.951736 | 531     |
| ENSGALT0000 v-myc myelocytomatosis viral onco        | MYCL1   | 0.990617 | 1342    |
| ENSGALT0000 v-myc myelocytomatosis viral relat       | MYCN    | 0.855564 | 374.634 |
| ENSGALT0000 myc target 1                             | MYCT1   | 0.723031 | 15      |
| ENSGALT0000 myeloid differentiation primary resp     | MYD88   | 0.983036 | 597.501 |
| ENSGALT0000 myelin expression factor 2               | MYEF2   | 0.965359 | 2832.65 |
| ENSGALT0000 myeloma overexpressed 2                  | MYEOV2  | 0.261742 | 1393    |
| ENSGALT0000 myogenic factor 5                        | MYF5    | 0.889974 | 6.5     |
| ENSGALT0000 myogenic factor 6 (herculin)             | MYF6    | 0.148008 | 18.5    |
| ENSGALT0000 myosin, heavy chain 1, skeletal mu       | MYH1    | 0.602147 | 4.01918 |
| ENSGALT0000 myosin, heavy chain 10, non-muscl        | MYH10   | 0.953933 | 19369.3 |
| ENSGALT0000 myosin, heavy chain 11, smooth m         | MYH11   | 0.953929 | 764.889 |
| ENSGALT0000 myosin, heavy chain 13, skeletal m       | MYH13   | 0.628023 | 5.62935 |
| ENSGALT0000 myosin, heavy chain 15                   | MYH15   | 0.866061 | 52      |
| ENSGALT0000 myosin, heavy chain 2, skeletal mu       | MYH2    | 0.510376 | 1.68312 |
| ENSGALT0000 myosin, heavy chain 3, skeletal mu       | MYH3    | 0.922494 | 9.33237 |
| ENSGALT0000 myosin, heavy chain 4, skeletal mu       | MYH4    | 0.599091 | 1.5     |
| ENSGALT0000 myosin, heavy chain 7, cardiac mu        | MYH7    | 0.990631 | 115.446 |
| ENSGALT0000 myosin, heavy chain 7B, cardiac m        | MYH7B   | 0.951874 | 15      |
| ENSGALT0000 myosin, heavy chain 8, skeletal mu       | MYH8    | 0.324485 | 0.85464 |
| ENSGALT0000 myosin, heavy polypeptide 9, non-r       | MYH9    | 0.949083 | 6569.5  |
| ENSGALT0000 myosin, light chain 1, alkali; skelet    | MYL1    | 0.431589 | 32.5    |
| ENSGALT0000 myosin, light chain 10, regulatory       | MYL10   | 0.439736 | 7.5     |
| ENSGALT0000 myosin, light chain 12A, regulatory,     | MYL12A  | 0.848724 | 5790.65 |
| ENSGALT0000 myosin, light chain 2, regulatory, ca    | MYL2    | 0.76475  | 15      |
| ENSGALT0000 myosin, light chain 3, alkali; ventric   | MYL3    | 0.164317 | 1.5     |
| ENSGALT0000 myosin, light chain 4, alkali; atrial, ε | MYL4    | 0.282573 | 1435.5  |
| ENSGALT0000 myosin, light chain 9, regulatory        | MYL9    | 0.867606 | 2078.03 |
| ENSGALT0000 myosin regulatory light chain intera     | MYLIP   | 0.997598 | 1266    |
| ENSGALT0000 myosin light chain kinase                | MYLK    | 0.801594 | 6179.43 |
| ENSGALT0000 myosin light chain kinase 2              | MYLK2   | 0.653125 | 22.5    |
| ENSGALT0000 myosin light chain kinase 3              | MYLK3   | 0.972169 | 152     |
| ENSGALT0000 myosin light chain kinase family, m      | MYLK4   | 0.7891   | 10      |
| ENSGALT0000 myoneurin                                | MYNN    | 0.963425 | 546     |
| ENSGALT0000 myosin X                                 | MYO10   | 0.990184 | 3234.52 |
| ENSGALT0000 myosin XVA                               | MYO15A  | 0.822721 | 133.5   |
| ENSGALT0000 myosin XVB pseudogene                    | MYO15B  | 0.930639 | 55      |
| ENSGALT0000 myosin XVI                               | MYO16   | 0.989259 | 912.002 |
| ENSGALT0000 myosin XVIII A                           | MYO18A  | 0.909553 | 10310.6 |
| ENSGALT0000 myosin XVIII B                           | MYO18B  | 0.548474 | 34.3479 |



|                                                          |         |          |         |
|----------------------------------------------------------|---------|----------|---------|
| ENSGALT0000 myosin XIX                                   | MYO19   | 0.963898 | 655.504 |
| ENSGALT0000 myosin IA                                    | MYO1A   | 0.478445 | 85      |
| ENSGALT0000 myosin IB                                    | MYO1B   | 0.78215  | 371     |
| ENSGALT0000 myosin IC                                    | MYO1C   | 0.965717 | 883.996 |
| ENSGALT0000 myosin ID                                    | MYO1D   | 0.994379 | 1270.5  |
| ENSGALT0000 myosin IE                                    | MYO1E   | 0.983595 | 682.5   |
| ENSGALT0000 myosin IF                                    | MYO1F   | 0.500721 | 39      |
| ENSGALT0000 myosin IG                                    | MYO1G   | 0.842779 | 17.5    |
| ENSGALT0000 myosin IH                                    | MYO1H   | 0.862728 | 227.5   |
| ENSGALT0000 myosin IIIA                                  | MYO3A   | 0.840446 | 83.5    |
| ENSGALT0000 myosin IIIB                                  | MYO3B   | 0.664463 | 27      |
| ENSGALT0000 myosin VA (heavy chain 12, myosin VI)        | MYO5A   | 0.926229 | 2926.41 |
| ENSGALT0000 myosin VB                                    | MYO5B   | 0.93106  | 12.5    |
| ENSGALT0000 myosin VC                                    | MYO5C   | 0.88991  | 147     |
| ENSGALT0000 myosin VI                                    | MYO6    | 0.869578 | 2527.5  |
| ENSGALT0000 myosin VIIA                                  | MYO7A   | 0.861899 | 1221.5  |
| ENSGALT0000 myosin VIIB                                  | MYO7B   | 0.893516 | 36      |
| ENSGALT0000 myosin IXA                                   | MYO9A   | 0.912766 | 2563    |
| ENSGALT0000 myosin IXB                                   | MYO9B   | 0.982091 | 1860.49 |
| ENSGALT0000 myocilin, trabecular meshwork inducible      | MYOC    | 0.804853 | 87.3977 |
| ENSGALT0000 myocardin                                    | MYOCD   | 0.754899 | 38      |
| ENSGALT0000 myogenic differentiation 1                   | MYOD1   | 0.748168 | 4       |
| ENSGALT0000 myoferlin                                    | MYOF    | 0.990407 | 342.5   |
| ENSGALT0000 myogenin (myogenic factor 4)                 | MYOG    | 0.524047 | 0.5     |
| ENSGALT0000 myomesin 1, 185kDa                           | MYOM1   | 0.882595 | 56.4626 |
| ENSGALT0000 myomesin (M-protein) 2, 165kDa               | MYOM2   | 0.949788 | 13      |
| ENSGALT0000 myomesin family, member 3                    | MYOM3   | 0.946544 | 8.5     |
| ENSGALT0000 myotilin                                     | MYOT    | 0.953493 | 4       |
| ENSGALT0000 myozenin 1                                   | MYOZ1   | 0.603682 | 0       |
| ENSGALT0000 myozenin 2                                   | MYOZ2   | 0.464758 | 0       |
| ENSGALT0000 myozenin 3                                   | MYOZ3   | 0.919314 | 19.5    |
| ENSGALT0000 myopalladin                                  | MYPN    | 0.978182 | 2.5     |
| ENSGALT0000 myosin VIIA and Rab interacting protein      | MYRIP   | 0.960334 | 76      |
| ENSGALT0000 myb-like, SWIRM and MPN domain protein       | MYSM1   | 0.979784 | 516.5   |
| ENSGALT0000 MYST histone acetyltransferase 2             | MYST2   | 0.933025 | 2566    |
| ENSGALT0000 MYST histone acetyltransferase (mouse)       | MYST4   | 0.987785 | 516.5   |
| ENSGALT0000 myelin transcription factor 1                | MYT1    | 0.674247 | 745.5   |
| ENSGALT0000 myelin transcription factor 1-like           | MYT1L   | 0.651073 | 118.5   |
| ENSGALT0000 mitotic spindle organizing protein 1         | MZT1    | 0.981291 | 562     |
| ENSGALT0000 NEDD4 binding protein 1                      | N4BP1   | 0.982509 | 786.506 |
| ENSGALT0000 NEDD4 binding protein 2                      | N4BP2   | 0.946809 | 122     |
| ENSGALT0000 NEDD4 binding protein 2-like 1               | N4BP2L1 | 0.963625 | 69.5    |
| ENSGALT0000 NEDD4 binding protein 2-like 2               | N4BP2L2 | 0.978277 | 415.998 |
| ENSGALT0000 NEDD4 binding protein 3                      | N4BP3   | 0.830076 | 710.001 |
| ENSGALT0000 N-6 adenine-specific DNA methyltransferase   | N6AMT1  | 0.920528 | 707.5   |
| ENSGALT0000 N-6 adenine-specific DNA methyltransferase   | N6AMT2  | 0.953149 | 723     |
| ENSGALT0000 N(alpha)-acetyltransferase 15, NatA          | NAA15   | 0.923471 | 1729    |
| ENSGALT0000 N(alpha)-acetyltransferase 16, NatA          | NAA16   | 0.974463 | 618.5   |
| ENSGALT0000 N(alpha)-acetyltransferase 20, NatA          | NAA20   | 0.467116 | 1780.5  |
| ENSGALT0000 N(alpha)-acetyltransferase 25, NatA          | NAA25   | 0.950075 | 1015    |
| ENSGALT0000 N(alpha)-acetyltransferase 30, NatA          | NAA30   | 0.943856 | 623     |
| ENSGALT0000 N(alpha)-acetyltransferase 35, NatA          | NAA35   | 0.950927 | 1326.5  |
| ENSGALT0000 N(alpha)-acetyltransferase 38, NatA          | NAA38   | 0.813607 | 527     |
| ENSGALT0000 N(alpha)-acetyltransferase 40, NatA          | NAA40   | 0.797315 | 3155    |
| ENSGALT0000 N-acylethanolamine acid amidase              | NAAA    | 0.740067 | 76      |
| ENSGALT0000 N-acetylated alpha-linked acidic dipeptidase | NAALAD2 | 0.987374 | 20.5    |

|                                                  |         |          |         |
|--------------------------------------------------|---------|----------|---------|
| ENSGALT0000 NGFI-A binding protein 1 (EGR1 bi    | NAB1    | 0.924226 | 672.5   |
| ENSGALT0000 Prostaglandin E synthase 3           | NACA    | 0.804255 | 1613.5  |
| ENSGALT0000 nascent polypeptide-associated co    | NACA2   | 0.266712 | 15766   |
| ENSGALT0000 NAC alpha domain containing          | NACAD   | 0.660919 | 1137.99 |
| ENSGALT0000 NACC family member 2, BEN and        | NACC2   | 0.933231 | 817.5   |
| ENSGALT0000 NAD kinase                           | NADK    | 0.997781 | 2040    |
| ENSGALT0000 NAD kinase domain containing 1       | NADKD1  | 0.980469 | 450.499 |
| ENSGALT0000 NAD synthetase 1                     | NADSYN1 | 0.961795 | 720.5   |
| ENSGALT0000 amyloid beta precursor protein binc  | NAE1    | 0.80851  | 1069.46 |
| ENSGALT0000 nuclear assembly factor 1 homolog    | NAF1    | 0.750011 | 313.5   |
| ENSGALT0000 N-acetylgalactosaminidase, alpha-    | NAGA    | 0.988864 | 1407    |
| ENSGALT0000 N-acetylglucosaminidase, alpha       | NAGLU   | 0.95559  | 1025.5  |
| ENSGALT0000 N-acetylglucosamine-1-phosphodie     | NAGPA   | 0.941082 | 475     |
| ENSGALT0000 hypothetical protein LOC417229       | NAIF1   | 0.97729  | 2425    |
| ENSGALT0000 sodium leak channel, non-selective   | NALCN   | 0.951027 | 446.5   |
| ENSGALT0000 nicotinamide phosphoribosyltransfe   | NAMPT   | 0.947283 | 541.505 |
| ENSGALT0000 N-acetylneuraminic acid phosphata    | NANP    | 0.905627 | 809.707 |
| ENSGALT0000 N-acetylneuraminic acid synthase     | NANS    | 0.884397 | 2295.46 |
| ENSGALT0000 nucleosome assembly protein 1-lik    | NAP1L1  | 0.955705 | 11136.5 |
| ENSGALT0000 nucleosome assembly protein 1-lik    | NAP1L4  | 0.947236 | 2528    |
| ENSGALT0000 N-ethylmaleimide-sensitive factor a  | NAPB    | 0.663742 | 237     |
| ENSGALT0000 N-acyl phosphatidylethanolamine p    | NAPEPLD | 0.949402 | 562     |
| ENSGALT0000 N-ethylmaleimide-sensitive factor a  | NAPG    | 0.965747 | 534.4   |
| ENSGALT0000 nicotinate phosphoribosyltransfera   | NAPRT1  | 0.856836 | 2521.99 |
| ENSGALT0000 nuclear prelamin A recognition fact  | NARF    | 0.951299 | 1900.5  |
| ENSGALT0000 nuclear prelamin A recognition fact  | NARFL   | 0.917125 | 379.5   |
| ENSGALT0000 NMDA receptor regulated 2            | NARG2   | 0.973153 | 461     |
| ENSGALT0000 asparaginyl-tRNA synthetase          | NARS    | 0.912966 | 2505    |
| ENSGALT0000 asparaginyl-tRNA synthetase 2, mil   | NARS2   | 0.967826 | 550.5   |
| ENSGALT0000 nuclear autoantigenic sperm protei   | NASP    | 0.758144 | 4858.01 |
| ENSGALT0000 N-acetyltransferase, liver isozyme   | NAT     | 0.377357 | 47      |
| ENSGALT0000 N-acetyltransferase 10 (GCN5-rela    | NAT10   | 0.917153 | 1136    |
| ENSGALT0000 Mak3 homolog                         | NAT13   | 0.93442  | 4200.5  |
| ENSGALT0000 N-acetyltransferase 8 (GCN5-relate   | NAT8    | 0.613068 | 537     |
| ENSGALT0000 N-acetyltransferase 8-like (GCN5-r   | NAT8L   | 0.993054 | 305     |
| ENSGALT0000 N-acetyltransferase 9 (GCN5-relate   | NAT9    | 0.932163 | 903.5   |
| ENSGALT0000 neuron navigator 1                   | NAV1    | 0.83767  | 3254.95 |
| ENSGALT0000 neuron navigator 2                   | NAV2    | 0.988268 | 2797.12 |
| ENSGALT0000 neuron navigator 3                   | NAV3    | 0.849932 | 1020.5  |
| ENSGALT0000 neuroblastoma amplified sequence     | NBAS    | 0.978593 | 1594.5  |
| ENSGALT0000 neurobeachin                         | NBEA    | 0.845616 | 1340    |
| ENSGALT0000 neurobeachin-like 1                  | NBEAL1  | 0.996407 | 865     |
| ENSGALT0000 neuroblastoma, suppression of tum    | NBL1    | 0.526949 | 7079.62 |
| ENSGALT0000 nibrin                               | NBN     | 0.939071 | 444.5   |
| ENSGALT0000 neighbor of BRCA1 gene 1             | NBR1    | 0.976825 | 3148    |
| ENSGALT0000 neurocalcin delta                    | NCALD   | 0.97804  | 1957    |
| ENSGALT0000 neural cell adhesion molecule 1      | NCAM1   | 0.841804 | 6347.35 |
| ENSGALT0000 neural cell adhesion molecule 2      | NCAM2   | 0.786381 | 113.5   |
| ENSGALT0000 chondroitin sulfate proteoglycan 3 ( | NCAN    | 0.840318 | 5168.46 |
| ENSGALT0000 non-SMC condensin II complex, su     | NCAPD3  | 0.899545 | 1191.5  |
| ENSGALT0000 non-SMC condensin I complex, su      | NCAPG   | 0.945725 | 1000    |
| ENSGALT0000 non-SMC condensin II complex, su     | NCAPG2  | 0.945566 | 341     |
| ENSGALT0000 non-SMC condensin II complex, su     | NCAPH2  | 0.820138 | 1336.48 |
| ENSGALT0000 nuclear cap binding protein subunit  | NCBP1   | 0.920946 | 2314    |
| ENSGALT0000 nuclear cap binding protein subunit  | NCBP2   | 0.657108 | 4984.5  |
| ENSGALT0000 neurochondrin                        | NCDN    | 0.972455 | 1667    |

|                                                  |         |           |         |
|--------------------------------------------------|---------|-----------|---------|
| ENSGALT0000 neutral cholesterol ester hydrolase  | NCEH1   | 0.927494  | 280.959 |
| ENSGALT0000 neutrophil cytosolic factor 1        | NCF1    | 0.842068  | 40.5    |
| ENSGALT0000 neutrophil cytosolic factor 2        | NCF2    | 0.833382  | 4       |
| ENSGALT0000 neutrophil cytosolic factor 4, 40kDa | NCF4    | 0.98229   | 14      |
| ENSGALT0000 NCK adaptor protein 2                | NCK2    | 0.934183  | 1519    |
| ENSGALT0000 NCK-associated protein 1             | NCKAP1  | 0.981313  | 6513    |
| ENSGALT0000 NCK-associated protein 5             | NCKAP5  | 0.914589  | 880     |
| ENSGALT0000 NCK interacting protein with SH3 d   | NCKIPSD | 0.881977  | 1363.5  |
| ENSGALT0000 nucleolin                            | NCL     | 0.94168   | 13134.8 |
| ENSGALT0000 nicalin                              | NCLN    | 0.940727  | 1504    |
| ENSGALT0000 nuclear receptor coactivator 1       | NCOA1   | 0.876959  | 3346.64 |
| ENSGALT0000 nuclear receptor coactivator 2       | NCOA2   | 0.976229  | 2167.56 |
| ENSGALT0000 nuclear receptor coactivator 3       | NCOA3   | 0.872477  | 834.5   |
| ENSGALT0000 nuclear receptor coactivator 4       | NCOA4   | 0.938179  | 3485    |
| ENSGALT0000 nuclear receptor coactivator 5       | NCOA5   | 0.934594  | 1488    |
| ENSGALT0000 nuclear receptor coactivator 6       | NCOA6   | 0.991573  | 3114.5  |
| ENSGALT0000 nuclear receptor coactivator 7       | NCOA7   | 0.985059  | 704.502 |
| ENSGALT0000 nuclear receptor corepressor 1       | NCOR1   | 0.972377  | 3278    |
| ENSGALT0000 neuronal calcium sensor 1            | NCS1    | 0.684479  | 978     |
| ENSGALT0000 nicastrin                            | NCSTN   | 0.985472  | 2551.5  |
| ENSGALT0000 NDC80 homolog, kinetochore component | NDC80   | 0.921175  | 516.5   |
| ENSGALT0000 nudE nuclear distribution gene E h   | NDE1    | 0.948407  | 1517.52 |
| ENSGALT0000 nudE nuclear distribution gene E h   | NDEL1   | 0.859208  | 442     |
| ENSGALT0000 Nedd4 family interacting protein 1   | NDFIP1  | 0.672528  | 3686.5  |
| ENSGALT0000 Nedd4 family interacting protein 2   | NDFIP2  | 0.987876  | 965.505 |
| ENSGALT0000 neuron-derived neurotrophic factor   | NDNF    | 0.81841   | 208     |
| ENSGALT0000 NADPH dependent diflavin oxidore     | NDOR1   | 0.901046  | 865.5   |
| ENSGALT0000 Norrie disease (pseudoglioma)        | NDP     | 0.774689  | 36      |
| ENSGALT0000 N-myc downstream regulated 1         | NDRG1   | 0.864228  | 922.5   |
| ENSGALT0000 NDRG family member 3                 | NDRG3   | 0.914275  | 1431.5  |
| ENSGALT0000 NDRG family member 4                 | NDRG4   | 0.684325  | 991.5   |
| ENSGALT0000 N-deacetylase/N-sulfotransferase (   | NDST1   | 0.976811  | 2722    |
| ENSGALT0000 N-deacetylase/N-sulfotransferase (   | NDST2   | 0.833269  | 2622.5  |
| ENSGALT0000 N-deacetylase/N-sulfotransferase (   | NDST3   | 0.793751  | 222.462 |
| ENSGALT0000 N-deacetylase/N-sulfotransferase (   | NDST4   | 0.760222  | 129.538 |
| ENSGALT0000 NADH dehydrogenase (ubiquinone       | NDUFA1  | 0.0770898 | 2286.05 |
| ENSGALT0000 NADH dehydrogenase (ubiquinone       | NDUFA10 | 0.833419  | 5202    |
| ENSGALT0000 NADH dehydrogenase (ubiquinone       | NDUFA11 | 0.539739  | 2422.5  |
| ENSGALT0000 NADH dehydrogenase (ubiquinone       | NDUFA12 | 0.117085  | 1758.5  |
| ENSGALT0000 NADH dehydrogenase (ubiquinone       | NDUFA2  | 0.0534399 | 1445.96 |
| ENSGALT0000 NADH dehydrogenase (ubiquinone       | NDUFA4  | 0.687426  | 2387    |
| ENSGALT0000 NADH dehydrogenase (ubiquinone       | NDUFA5  | 0.73295   | 1442    |
| ENSGALT0000 NADH dehydrogenase (ubiquinone       | NDUFA6  | 0.224114  | 1649    |
| ENSGALT0000 NADH dehydrogenase (ubiquinone       | NDUFA7  | 0.256361  | 534.5   |
| ENSGALT0000 NADH dehydrogenase (ubiquinone       | NDUFA8  | 0.250852  | 2831.5  |
| ENSGALT0000 NADH dehydrogenase (ubiquinone       | NDUFA9  | 0.897485  | 2029.01 |
| ENSGALT0000 NADH dehydrogenase (ubiquinone       | NDUFAB1 | 0.0240622 | 2281.5  |
| ENSGALT0000 NADH dehydrogenase (ubiquinone       | NDUFAF1 | 0.930059  | 1423    |
| ENSGALT0000 NADH dehydrogenase (ubiquinone       | NDUFAF2 | 0.658415  | 491.5   |
| ENSGALT0000 NADH dehydrogenase (ubiquinone       | NDUFAF4 | 0.819191  | 127     |
| ENSGALT0000 NADH dehydrogenase (ubiquinone       | NDUFB10 | 0.383044  | 5005.5  |
| ENSGALT0000 NADH dehydrogenase (ubiquinone       | NDUFB2  | 0.0675121 | 3302.64 |
| ENSGALT0000 NADH dehydrogenase (ubiquinone       | NDUFB3  | 0.604696  | 1258    |
| ENSGALT0000 NADH dehydrogenase (ubiquinone       | NDUFB4  | 0.123118  | 3510.4  |
| ENSGALT0000 NADH dehydrogenase (ubiquinone       | NDUFB5  | 0.39488   | 2702.5  |
| ENSGALT0000 NADH dehydrogenase (ubiquinone       | NDUFB6  | 0.438209  | 1659.5  |

|                                                          |           |          |         |
|----------------------------------------------------------|-----------|----------|---------|
| ENSGALT0000 NADH dehydrogenase (ubiquinone NDUFB8        | 0.499093  | 2479     |         |
| ENSGALT0000 NADH dehydrogenase (ubiquinone NDUFB9        | 0.0425032 | 3616.5   |         |
| ENSGALT0000 NADH dehydrogenase (ubiquinone NDUFS1        | 0.881222  | 3789.5   |         |
| ENSGALT0000 NADH dehydrogenase (ubiquinone NDUFS2        | 0.847087  | 1429.99  |         |
| ENSGALT0000 NADH dehydrogenase (ubiquinone NDUFS3        | 0.886008  | 1516     |         |
| ENSGALT0000 NADH dehydrogenase (ubiquinone NDUFS4        | 0.637082  | 875.501  |         |
| ENSGALT0000 NADH dehydrogenase (ubiquinone NDUFS5        | 0.214018  | 1707     |         |
| ENSGALT0000 NADH dehydrogenase (ubiquinone NDUFS6        | 0.597162  | 798.5    |         |
| ENSGALT0000 NADH dehydrogenase (ubiquinone NDUFS7        | 0.253195  | 1279.5   |         |
| ENSGALT0000 NADH dehydrogenase (ubiquinone NDUFS8        | 0.208301  | 3435     |         |
| ENSGALT0000 NADH dehydrogenase (ubiquinone NDUFV2        | 0.653222  | 1474.5   |         |
| ENSGALT0000 NADH dehydrogenase (ubiquinone NDUFV3        | 0.341536  | 645      |         |
| ENSGALT0000 nebulette                                    | NEBL      | 0.94136  | 507.498 |
| ENSGALT0000 N-terminal EF-hand calcium binding           | NECAB1    | 0.81267  | 382     |
| ENSGALT0000 N-terminal EF-hand calcium binding           | NECAB2    | 0.600087 | 20      |
| ENSGALT0000 N-terminal EF-hand calcium binding           | NECAB3    | 0.549394 | 966.5   |
| ENSGALT0000 NECAP endocytosis associated 1               | NECAP1    | 0.899282 | 1081    |
| ENSGALT0000 NECAP endocytosis associated 2               | NECAP2    | 0.956436 | 1526    |
| ENSGALT0000 neural precursor cell expressed, development | NEDD1     | 0.971285 | 1447    |
| ENSGALT0000 neural precursor cell expressed, development | NEDD4     | 0.966541 | 701.501 |
| ENSGALT0000 neural precursor cell expressed, development | NEDD4L    | 0.958493 | 3168.5  |
| ENSGALT0000 neural precursor cell expressed, development | NEDD9     | 0.955184 | 309.5   |
| ENSGALT0000 neurofilament, light polypeptide             | NEFL      | 0.743777 | 6039.99 |
| ENSGALT0000 neurofilament, medium polypeptide            | NEFM      | 0.667216 | 8702.98 |
| ENSGALT0000 neuronal growth regulator 1                  | NEGR1     | 0.584637 | 244     |
| ENSGALT0000 nei endonuclease VIII-like 1 (E. coli)       | NEIL1     | 0.908607 | 123     |
| ENSGALT0000 nei endonuclease VIII-like 2 (E. coli)       | NEIL2     | 0.464758 | 0       |
| ENSGALT0000 nei endonuclease VIII-like 3 (E. coli)       | NEIL3     | 0.97154  | 127     |
| ENSGALT0000 NIMA (never in mitosis gene a)-related       | NEK1      | 0.969699 | 1270    |
| ENSGALT0000 NIMA (never in mitosis gene a)-related       | NEK10     | 0.833324 | 1.5     |
| ENSGALT0000 NIMA (never in mitosis gene a)-related       | NEK11     | 0.979069 | 53.5    |
| ENSGALT0000 NIMA (never in mitosis gene a)-related       | NEK2      | 0.815143 | 437     |
| ENSGALT0000 NIMA (never in mitosis gene a)-related       | NEK3      | 0.912177 | 272.5   |
| ENSGALT0000 NIMA (never in mitosis gene a)-related       | NEK4      | 0.963522 | 1608.01 |
| ENSGALT0000 NIMA (never in mitosis gene a)-related       | NEK5      | 0.924978 | 47      |
| ENSGALT0000 NIMA (never in mitosis gene a)-related       | NEK6      | 0.979811 | 5074.5  |
| ENSGALT0000 NIMA (never in mitosis gene a)-related       | NEK7      | 0.951069 | 395.002 |
| ENSGALT0000 NIMA (never in mitosis gene a)-related       | NEK8      | 0.998878 | 769     |
| ENSGALT0000 NIMA (never in mitosis gene a)-related       | NEK9      | 0.963523 | 4151.5  |
| ENSGALT0000 nasal embryonic LHRH factor                  | NELF      | 0.859468 | 228     |
| ENSGALT0000 NEL-like 1 (chicken)                         | NELL1     | 0.866456 | 1252.5  |
| ENSGALT0000 NEL-like 2 (chicken)                         | NELL2     | 0.732585 | 3271.11 |
| ENSGALT0000 neudesin neurotrophic factor                 | NENF      | 0.960739 | 559     |
| ENSGALT0000 neogenin 1                                   | NEO1      | 0.945985 | 12841.5 |
| ENSGALT0000 nestin                                       | NES       | 0.849824 | 8764.2  |
| ENSGALT0000 neuroepithelial cell transforming 1          | NET1      | 0.989304 | 2402    |
| ENSGALT0000 neuropilin (NRP) and tolloid (TLL)-I         | NETO1     | 0.816213 | 201     |
| ENSGALT0000 neuropilin (NRP) and tolloid (TLL)-I         | NETO2     | 0.995807 | 1462    |
| ENSGALT0000 sialidase 2 (cytosolic sialidase)            | NEU2      | 0.649519 | 4       |
| ENSGALT0000 sialidase 3 (membrane sialidase)             | NEU3      | 0.970199 | 522     |
| ENSGALT0000 sialidase 4                                  | NEU4      | 0.990721 | 307     |
| ENSGALT0000 neuralized homolog (Drosophila)              | NEURL     | 0.792666 | 200     |
| ENSGALT0000 neuralized homolog 1B (Drosophila)           | NEURL1B   | 0.62168  | 121     |
| ENSGALT0000 neuralized homolog 2 (Drosophila)            | NEURL2    | 0.5865   | 4.5     |
| ENSGALT0000 neurogenic differentiation 1                 | NEUROD1   | 0.194863 | 259.5   |
| ENSGALT0000 NeuroM protein                               | NEUROD4   | 0.367971 | 43.5    |

|                                                                      |         |           |         |
|----------------------------------------------------------------------|---------|-----------|---------|
| ENSGALT0000 neurogenic differentiation 6                             | NEUROD6 | 0.677553  | 0.5     |
| ENSGALT0000 neurogenin 1                                             | NEUROG1 | 0.842762  | 10      |
| ENSGALT0000 nexilin (F actin binding protein)                        | NEXN    | 0.933785  | 101.5   |
| ENSGALT0000 neurofibromin 1                                          | NF1     | 0.970167  | 3656.96 |
| ENSGALT0000 neurofibromin 2 (bilateral acoustic r                    | NF2     | 0.859249  | 3715.53 |
| ENSGALT0000 NFAT activating protein with ITAM r                      | NFAM1   | 0.545576  | 4       |
| ENSGALT0000 neurofascin                                              | NFASC   | 0.783034  | 657.498 |
| ENSGALT0000 nuclear factor of activated T-cells 5                    | NFAT5   | 0.977927  | 4468    |
| ENSGALT0000 nuclear factor of activated T-cells, c                   | NFATC1  | 0.991055  | 424     |
| ENSGALT0000 nuclear factor of activated T-cells, c                   | NFATC2  | 0.948881  | 38.5    |
| ENSGALT0000 nuclear factor of activated T-cells, c                   | NFATC3  | 0.993706  | 1518    |
| ENSGALT0000 nuclear factor (erythroid-derived 2)-                    | NFE2L1  | 0.972281  | 4808.13 |
| ENSGALT0000 nuclear factor (erythroid-derived 2)-                    | NFE2L2  | 0.983944  | 776.476 |
| ENSGALT0000 nuclear factor I/A                                       | NFIA    | 0.963278  | 2326.99 |
| ENSGALT0000 nuclear factor I/B                                       | NFIB    | 0.903088  | 466.5   |
| ENSGALT0000 nuclear factor, interleukin 3 regulat                    | NFIL3   | 0.965762  | 357     |
| ENSGALT0000 nuclear factor of kappa light polype                     | NFKB1   | 0.98588   | 1006.99 |
| ENSGALT0000 nuclear factor of kappa light polype                     | NFKB2   | 0.928474  | 625.5   |
| ENSGALT0000 nuclear factor of kappa light polype                     | NFKBIA  | 0.924927  | 522.5   |
| ENSGALT0000 nuclear factor of kappa light polype                     | NFKBIE  | 0.584693  | 184.5   |
| ENSGALT0000 nuclear factor of kappa light polype                     | NFKBIZ  | 0.999803  | 164.5   |
| ENSGALT0000 nuclear factor related to kappa B bi                     | NFRKB   | 0.965404  | 2080.48 |
| ENSGALT0000 NFS1 nitrogen fixation 1 homolog (                       | NFS1    | 0.980079  | 1704.5  |
| ENSGALT0000 NFU1 iron-sulfur cluster scaffold hc                     | NFU1    | 0.883428  | 825.5   |
| ENSGALT0000 nuclear transcription factor, X-box t                    | NFX1    | 0.987471  | 839.5   |
| ENSGALT0000 nuclear transcription factor, X-box t                    | NFXL1   | 0.975173  | 757.5   |
| ENSGALT0000 nuclear transcription factor Y, alpha                    | NFYA    | 0.974061  | 3192.42 |
| ENSGALT0000 nuclear transcription factor Y, beta                     | NFYB    | 0.937293  | 736.501 |
| ENSGALT0000 nuclear transcription factor Y, gamr                     | NFYC    | 0.725965  | 5985    |
| ENSGALT0000 neuroglobin                                              | NGB     | 0.840653  | 34      |
| ENSGALT0000 neuronal guanine nucleotide excha                        | NGEF    | 0.973901  | 53      |
| ENSGALT0000 nerve growth factor (beta polypepti                      | NGF     | 0.877181  | 11.5    |
| ENSGALT0000 nerve growth factor receptor (TNFF                       | NGFR    | 0.731494  | 481     |
| ENSGALT0000 N-glycanase 1                                            | NGLY1   | 0.98245   | 954.003 |
| ENSGALT0000 Na <sup>+</sup> /H <sup>+</sup> exchanger domain contain | NHEDC2  | 0.928764  | 317     |
| ENSGALT0000 nonhomologous end-joining factor                         | NHEJ1   | 0.91357   | 99.5    |
| ENSGALT0000 nescient helix loop helix 1                              | NHLH1   | 0.362513  | 99.9999 |
| ENSGALT0000 NHL repeat containing 1                                  | NHLRC1  | 0.748565  | 286.5   |
| ENSGALT0000 NHL repeat containing 2                                  | NHLRC2  | 0.950884  | 582     |
| ENSGALT0000 NHL repeat containing 3                                  | NHLRC3  | 0.991231  | 299.5   |
| ENSGALT0000 NHP2 ribonucleoprotein homolog (                         | NHP2    | 0.0883956 | 1631    |
| ENSGALT0000 NHP2 non-histone chromosome pr                           | NHP2L1  | 0.84838   | 2276.47 |
| ENSGALT0000 Nance-Horan syndrome (congenita                          | NHS     | 0.989537  | 1098    |
| ENSGALT0000 nidogen 1                                                | NID1    | 0.977841  | 10311.1 |
| ENSGALT0000 nidogen 2 (osteonidogen)                                 | NID2    | 0.71769   | 2326.5  |
| ENSGALT0000 NIF3 NGG1 interacting factor 3-like                      | NIF3L1  | 0.888177  | 918.5   |
| ENSGALT0000 serine/threonine-protein kinase NIM                      | NIM1    | 0.927537  | 11      |
| ENSGALT0000 ninein (GSK3B interacting protein)                       | NIN     | 0.905913  | 1872.5  |
| ENSGALT0000 ninjurin 1                                               | NINJ1   | 0.95193   | 165     |
| ENSGALT0000 ninjurin 2                                               | NINJ2   | 0.514506  | 58      |
| ENSGALT0000 ninein-like                                              | NINL    | 0.938962  | 184     |
| ENSGALT0000 nuclear import 7 homolog (S. cerev                       | NIP7    | 0.517904  | 2729.5  |
| ENSGALT0000 non imprinted in Prader-Willi/Angel                      | NIPA1   | 0.910324  | 637.499 |
| ENSGALT0000 non imprinted in Prader-Willi/Angel                      | NIPA2   | 0.90383   | 1067.5  |
| ENSGALT0000 NIPA-like domain containing 1                            | NIPAL1  | 0.952407  | 14.5    |
| ENSGALT0000 NIPA-like domain containing 2                            | NIPAL2  | 0.847454  | 155.5   |

|                                                                        |           |          |         |
|------------------------------------------------------------------------|-----------|----------|---------|
| ENSGALT0000 NIPA-like domain containing 3                              | NIPAL3    | 0.966369 | 1582    |
| ENSGALT0000 NIPA-like domain containing 4                              | NIPAL4    | 0.927977 | 3.5     |
| ENSGALT0000 Nipped-B homolog (Drosophila)                              | NIPBL     | 0.991405 | 3054.79 |
| ENSGALT0000 nipsnap homolog 1 (C. elegans)                             | NIPSNAP1  | 0.447187 | 968     |
| ENSGALT0000 nipsnap homolog 3A (C. elegans)                            | NIPSNAP3A | 0.679853 | 1521.5  |
| ENSGALT0000 nischarin                                                  | NISCH     | 0.948188 | 1279    |
| ENSGALT0000 nitrilase family, member 2                                 | NIT2      | 0.971404 | 451     |
| ENSGALT0000 Na <sup>+</sup> /K <sup>+</sup> transporting ATPase intera | NKAIN1    | 0.682926 | 519.5   |
| ENSGALT0000 Na <sup>+</sup> /K <sup>+</sup> transporting ATPase intera | NKAIN2    | 0.874935 | 234.5   |
| ENSGALT0000 Na <sup>+</sup> /K <sup>+</sup> transporting ATPase intera | NKAIN3    | 0.926706 | 220     |
| ENSGALT0000 Na <sup>+</sup> /K <sup>+</sup> transporting ATPase intera | NKAIN4    | 0.592978 | 222     |
| ENSGALT0000 NFKB activating protein                                    | NKAP      | 0.930801 | 693.501 |
| ENSGALT0000 naked cuticle homolog 1 (Drosophi                          | NKD1      | 0.991027 | 604     |
| ENSGALT0000 NFKB inhibitor interacting Ras-like                        | NKIRAS1   | 0.80289  | 147.5   |
| ENSGALT0000 NFKB inhibitor interacting Ras-like                        | NKIRAS2   | 0.841926 | 4512    |
| ENSGALT0000 NF-kappaB repressing factor                                | NKRF      | 0.941282 | 774     |
| ENSGALT0000 natural killer-tumor recognition seq                       | NKTR      | 0.99723  | 2722.12 |
| ENSGALT0000 NK2 homeobox 1                                             | NKX2-1    | 0.464758 | 0       |
| ENSGALT0000 NK2 transcription factor related, loc                      | NKX2-5    | 0        | 0       |
| ENSGALT0000 NK2 homeobox 6                                             | NKX2-6    | 0.649519 | 0       |
| ENSGALT0000 NK6 homeobox 2                                             | NKX6-2    | 0.945018 | 34.5    |
| ENSGALT0000 NK6 homeobox 3                                             | NKX6-3    | 1        | 1.5     |
| ENSGALT0000 notchless homolog 1 (Drosophila)                           | NLE1      | 0.879721 | 412     |
| ENSGALT0000 neuroligin 1                                               | NLGN1     | 0.831812 | 150     |
| ENSGALT0000 neuroligin 3                                               | NLGN3     | 0.790085 | 971.5   |
| ENSGALT0000 neuroligin 4, X-linked                                     | NLGN4X    | 0.802343 | 91      |
| ENSGALT0000 nemo-like kinase                                           | NLK       | 0.970698 | 1059.5  |
| ENSGALT0000 neurolysin (metallopeptidase M3 fa                         | NLN       | 0.918664 | 381     |
| ENSGALT0000 NLR family, CARD domain containi                           | NLRC3     | 0.714122 | 7.5     |
| ENSGALT0000 neuromedin B                                               | NMB       | 0.040986 | 63      |
| ENSGALT0000 neuromedin B receptor                                      | NMBR      | 0.603682 | 0.5     |
| ENSGALT0000 NMD3 homolog (S. cerevisiae)                               | NMD3      | 0.941442 | 845     |
| ENSGALT0000 non-metastatic cells 1, protein (NM                        | NME1      | 0.600538 | 739.719 |
| ENSGALT0000 non-metastatic cells 2, protein (NM                        | NME2      | 0.598915 | 22155.3 |
| ENSGALT0000 non-metastatic cells 6, protein expr                       | NME6      | 0.829863 | 116.5   |
| ENSGALT0000 N-myc (and STAT) interactor                                | NMI       | 0.965169 | 323     |
| ENSGALT0000 nicotinamide nucleotide adenylyltra                        | NMNAT1    | 0.929857 | 138     |
| ENSGALT0000 nicotinamide nucleotide adenylyltra                        | NMNAT2    | 0.586579 | 601     |
| ENSGALT0000 nicotinamide nucleotide adenylyltra                        | NMNAT3    | 0.713319 | 5.5     |
| ENSGALT0000 NmrA-like family domain containinç                         | NMRAL1    | 0.838799 | 1456.5  |
| ENSGALT0000 N-myristoyltransferase 1                                   | NMT1      | 0.837735 | 1948.5  |
| ENSGALT0000 N-myristoyltransferase 2                                   | NMT2      | 0.949647 | 581     |
| ENSGALT0000 neuromedin U                                               | NMU       | 0.853815 | 0.5     |
| ENSGALT0000 neuromedin U receptor 2                                    | NMUR2     | 0.593377 | 2.5     |
| ENSGALT0000 nicotinamide nucleotide transhydro                         | NNT       | 0.95022  | 2533    |
| ENSGALT0000 nitric oxide associated 1                                  | NOA1      | 0.878946 | 1262    |
| ENSGALT0000 NIN1/RPN12 binding protein 1 horr                          | NOB1      | 0.622522 | 1858.5  |
| ENSGALT0000 nucleolar complex associated 2 ho                          | NOC2L     | 0.879334 | 2246    |
| ENSGALT0000 nucleolar complex associated 3 ho                          | NOC3L     | 0.980894 | 794     |
| ENSGALT0000 nucleolar complex associated 4 ho                          | NOC4L     | 0.850637 | 4675.5  |
| ENSGALT0000 nucleotide-binding oligomerization                         | NOD1      | 0.940477 | 154     |
| ENSGALT0000 nodal homolog (mouse)                                      | NODAL     | 0.465683 | 1.5     |
| ENSGALT0000 noggin                                                     | NOG       | 0.42002  | 265     |
| ENSGALT0000 noggin 2                                                   | NOG2      | 0.870109 | 57      |
| ENSGALT0000 nucleolar protein 10                                       | NOL10     | 0.932618 | 632.5   |
| ENSGALT0000 nucleolar protein 11                                       | NOL11     | 0.949964 | 1192    |

|                                                   |         |          |         |
|---------------------------------------------------|---------|----------|---------|
| ENSGALT0000 nucleolar protein 12                  | NOL12   | 0.803677 | 570.5   |
| ENSGALT0000 nucleolar protein 4                   | NOL4    | 0.675244 | 98      |
| ENSGALT0000 nucleolar protein family 6 (RNA-ass   | NOL6    | 0.906417 | 1175.52 |
| ENSGALT0000 nucleolar protein 7, 27kDa            | NOL7    | 0.300186 | 753.5   |
| ENSGALT0000 nucleolar protein 8                   | NOL8    | 0.996517 | 628.5   |
| ENSGALT0000 nucleolar and coiled-body phospho     | NOLC1   | 0.924526 | 2482    |
| ENSGALT0000 nucleolar protein with MIF4G doma     | NOM1    | 0.915458 | 339.5   |
| ENSGALT0000 non-POU domain containing, octan      | NONO    | 0.896971 | 16778.5 |
| ENSGALT0000 NOP14 nucleolar protein homolog       | (NOP14  | 0.94789  | 766.991 |
| ENSGALT0000 NOP16 nucleolar protein homolog       | (NOP16  | 0.350833 | 943.5   |
| ENSGALT0000 NOP2 nucleolar protein homolog        | (yNOP2  | 0.886964 | 1838.53 |
| ENSGALT0000 NOP56 ribonucleoprotein homolog       | NOP56   | 0.793186 | 3257.28 |
| ENSGALT0000 NOP58 ribonucleoprotein homolog       | NOP58   | 0.953236 | 2577.5  |
| ENSGALT0000 nitric oxide synthase 1 (neuronal)    | NOS1    | 0.690185 | 2.5     |
| ENSGALT0000 nitric oxide synthase 1 (neuronal) a  | NOS1AP  | 0.711806 | 1345    |
| ENSGALT0000 nitric oxide synthase 2, inducible    | NOS2    | 0.994688 | 703.496 |
| ENSGALT0000 notch 1                               | NOTCH1  | 0.989916 | 25734.3 |
| ENSGALT0000 notch 2                               | NOTCH2  | 0.999138 | 10820.8 |
| ENSGALT0000 notum pectinacetylerase homolo        | NOTUM   | 0.715469 | 1308.5  |
| ENSGALT0000 nephroblastoma overexpressed ge       | NOV     | 0.913607 | 82.5    |
| ENSGALT0000 neuro-oncological ventral antigen 1   | NOVA1   | 0.858986 | 578.999 |
| ENSGALT0000 NADPH oxidase 1                       | NOX1    | 0.906566 | 5       |
| ENSGALT0000 NADPH oxidase 3                       | NOX3    | 0.36651  | 1.5     |
| ENSGALT0000 NADPH oxidase 4                       | NOX4    | 0.945197 | 307.5   |
| ENSGALT0000 NADPH oxidase, EF-hand calcium        | NOX5    | 0.950295 | 115     |
| ENSGALT0000 NADPH oxidase activator 1             | NOXA1   | 0.99106  | 264.5   |
| ENSGALT0000 NADPH oxidase organizer 1             | NOXO1   | 0.376542 | 54      |
| ENSGALT0000 NADP-dependent oxidoreductase c       | NOXRED1 | 0.935801 | 19.5    |
| ENSGALT0000 neuronal PAS domain protein 2         | NPAS2   | 0.888655 | 61.5001 |
| ENSGALT0000 nuclear protein, ataxia-telangiectas  | NPAT    | 0.970578 | 741.5   |
| ENSGALT0000 neuropeptides B/W receptor 1          | NPBWR1  | 0.649519 | 0.5     |
| ENSGALT0000 Niemann-Pick disease, type C1         | NPC1    | 0.977903 | 1267.21 |
| ENSGALT0000 Niemann-Pick disease, type C2         | NPC2    | 0.932795 | 1816.01 |
| ENSGALT0000 neural proliferation, differentiation | NPDC1   | 0.846495 | 979.5   |
| ENSGALT0000 aminopeptidase-like 1                 | NPEPL1  | 0.879731 | 1899    |
| ENSGALT0000 aminopeptidase puromycin sensitiv     | NPEPPS  | 0.967445 | 8613.42 |
| ENSGALT0000 neuropeptide FF receptor 1            | NPFFR1  | 0.460332 | 3       |
| ENSGALT0000 neuropeptide FF receptor 2            | NPFFR2  | 0.700858 | 4       |
| ENSGALT0000 nephronophthisis 1 (juvenile)         | NPHP1   | 0.969879 | 974.549 |
| ENSGALT0000 nephronophthisis 3 (adolescent)       | NPHP3   | 0.97674  | 1026    |
| ENSGALT0000 nephronophthisis 4                    | NPHP4   | 0.939932 | 442.5   |
| ENSGALT0000 nephrosis 2, idiopathic, steroid-resi | NPHS2   | ?        | 0       |
| ENSGALT0000 N-acetylneuraminate pyruvate lyas     | NPL     | 0.59311  | 115.5   |
| ENSGALT0000 nuclear protein localization 4 homo   | NPLOC4  | 0.954088 | 2079.5  |
| ENSGALT0000 nucleophosmin (nucleolar phospho      | NPM1    | 0.870174 | 21281.8 |
| ENSGALT0000 nucleophosmin/nucleoplasmin 3         | NPM3    | 0.693608 | 883     |
| ENSGALT0000 nephronectin                          | NPNT    | 0.84295  | 4303.5  |
| ENSGALT0000 natriuretic peptide B                 | NPPB    | 0.77419  | 3.5     |
| ENSGALT0000 C-type natriuretic peptide            | NPPC    | 0.649519 | 0.5     |
| ENSGALT0000 natriuretic peptide receptor A/guan   | NPR1    | 0.83162  | 5       |
| ENSGALT0000 natriuretic peptide receptor C/guan   | NPR3    | 0.803386 | 468.5   |
| ENSGALT0000 nitrogen permease regulator-like 2    | NPRL2   | 0.895426 | 935.5   |
| ENSGALT0000 nitrogen permease regulator-like 3    | NPRL3   | 0.96264  | 818.504 |
| ENSGALT0000 neuropeptide S receptor 1             | NPSR1   | 0.464758 | 0       |
| ENSGALT0000 neuroplastin                          | NPTN    | 0.802572 | 3016.51 |
| ENSGALT0000 neuronal pentraxin I                  | NPTX1   | 0.420011 | 14.5    |

|                                                                    |            |          |         |
|--------------------------------------------------------------------|------------|----------|---------|
| ENSGALT0000 neuronal pentraxin II                                  | NPTX2      | 0.434977 | 84      |
| ENSGALT0000 neuronal pentraxin receptor                            | NPTXR      | 0.850416 | 215.5   |
| ENSGALT0000 neuropeptide VF precursor                              | NPVF       | 0.524047 | 0.5     |
| ENSGALT0000 neuropeptide Y                                         | NPY        | 0.762855 | 54      |
| ENSGALT0000 neuropeptide Y receptor Y1                             | NPY1R      | 0.358817 | 2       |
| ENSGALT0000 neuropeptide Y receptor Y2                             | NPY2R      | 0.887859 | 63.5    |
| ENSGALT0000 neuropeptide Y receptor Y5                             | NPY5R      | 0.80726  | 43      |
| ENSGALT0000 NPY receptor Y6                                        | NPY6R      | ?        | 0       |
| ENSGALT0000 neuropeptide Y7 receptor                               | NPY7R      | 0.761864 | 10.5    |
| ENSGALT0000 NAD(P)H dehydrogenase, quinone                         | NQO1       | 0.788986 | 21      |
| ENSGALT0000 NAD(P)H dehydrogenase, quinone                         | NQO2       | 0.963025 | 323.5   |
| ENSGALT0000 nuclear receptor subfamily 0, group NR0B1              |            | 0.871347 | 61.5    |
| ENSGALT0000 nuclear receptor subfamily 0, group NR0B2              |            | 0.9977   | 8.5     |
| ENSGALT0000 nuclear receptor subfamily 1, group NR1D2              |            | 0.951812 | 281     |
| ENSGALT0000 nuclear receptor subfamily 1, group NR1H3              |            | 0.979304 | 1365.03 |
| ENSGALT0000 nuclear receptor subfamily 1, group NR1H4              |            | 0.464758 | 0       |
| ENSGALT0000 nuclear receptor subfamily 2, group NR2C1              |            | 0.991531 | 855.492 |
| ENSGALT0000 nuclear receptor subfamily 2, group NR2C2              |            | 0.985782 | 719.996 |
| ENSGALT0000 nuclear receptor subfamily 2, group NR2E1              |            | 0.732378 | 2.5     |
| ENSGALT0000 nuclear receptor subfamily 2, group NR2E3              |            | 0.632435 | 238.5   |
| ENSGALT0000 nuclear receptor subfamily 2, group NR2F2              |            | 0.898958 | 5737.15 |
| ENSGALT0000 nuclear receptor subfamily 3, group NR3C1              |            | 0.991224 | 775.499 |
| ENSGALT0000 nuclear receptor subfamily 3, group NR3C2              |            | 0.999316 | 792.001 |
| ENSGALT0000 nuclear receptor subfamily 4, group NR4A2              |            | 0.792947 | 20.5035 |
| ENSGALT0000 nuclear receptor subfamily 4, group NR4A3              |            | 0.813436 | 117.5   |
| ENSGALT0000 nuclear receptor subfamily 5, group NR5A1              |            | 0.746966 | 8.49989 |
| ENSGALT0000 nuclear receptor subfamily 5, group NR5A2              |            | 0.854478 | 13.5    |
| ENSGALT0000 nuclear receptor subfamily 6, group NR6A1              |            | 0.958535 | 269     |
| ENSGALT0000 nebulin-related anchoring protein                      | NRAP       | 0.720381 | 5       |
| ENSGALT0000 neuroblastoma RAS viral (v-ras) oncogene homolog       | NRAS       | 0.945081 | 655.5   |
| ENSGALT0000 nuclear receptor binding factor 2                      | NRBF2      | 0.970465 | 398     |
| ENSGALT0000 nuclear receptor binding protein 1                     | NRBP1      | 0.779364 | 1640.5  |
| ENSGALT0000 nuclear receptor binding protein 2                     | NRBP2      | 0.985962 | 705.5   |
| ENSGALT0000 neuronal cell adhesion molecule                        | NRCAM      | 0.927989 | 1356.99 |
| ENSGALT0000 nardilysin (N-arginine dibasic convertase)             | NRD1       | 0.954054 | 3925    |
| ENSGALT0000 nuclear respiratory factor 1                           | NRF1       | 0.943456 | 1044.5  |
| ENSGALT0000 neuregulin 1                                           | NRG1       | 0.785088 | 288.501 |
| ENSGALT0000 neuregulin 2                                           | NRG2       | 0.780486 | 59      |
| ENSGALT0000 neuregulin 3                                           | NRG3       | 0.811724 | 141     |
| ENSGALT0000 neuregulin 4                                           | NRG4       | 0.990224 | 285.5   |
| ENSGALT0000 neurogranin (protein kinase C substrate)               | NRGN       | 0.783969 | 265     |
| ENSGALT0000 nuclear receptor interacting protein                   | NRIP3      | 0.70587  | 41.5    |
| ENSGALT0000 Nik related kinase                                     | NRK        | 0.891354 | 567     |
| ENSGALT0000 neuritin 1                                             | NRN1       | 0.415829 | 248.5   |
| ENSGALT0000 ncRNA Repressor of NFAT (nuclear respiratory factor 1) | NRON       | ?        | 0       |
| ENSGALT0000 neuropilin 1                                           | NRP1       | 0.941948 | 2051.5  |
| ENSGALT0000 neuropilin 2                                           | NRP2       | 0.705228 | 1749.02 |
| ENSGALT0000 neurensin 1                                            | NRSN1      | 0.901067 | 227     |
| ENSGALT0000 NAD(P)(+)-arginine ADP-ribosyltransferase              | NRT2_CHICK | ?        | 0       |
| ENSGALT0000 neurexin 1                                             | NRXN1      | 0.768328 | 813.997 |
| ENSGALT0000 neurexin 3                                             | NRXN3      | 0.896248 | 249     |
| ENSGALT0000 NSA2 ribosome biogenesis homolog                       | NSA2       | 0.796645 | 2634.46 |
| ENSGALT0000 nuclear receptor binding SET domain protein            | NSD1       | 0.987402 | 5225.98 |
| ENSGALT0000 NAD(P) dependent steroid dehydrogenase                 | NSDHL      | 0.709636 | 247.5   |
| ENSGALT0000 N-ethylmaleimide-sensitive factor                      | NSF        | 0.868308 | 1607.5  |
| ENSGALT0000 NSFL1 (p97) cofactor (p47)                             | NSFL1C     | 0.754481 | 2367.01 |



|                                                           |             |          |         |
|-----------------------------------------------------------|-------------|----------|---------|
| ENSGALT0000 LZ1                                           | NSG1        | 0.80257  | 2746.5  |
| ENSGALT0000 NSL1, MIND kinetochore complex (NSL1          |             | 0.849854 | 698.996 |
| ENSGALT0000 neutral sphingomyelinase (N-SMAs NSMAF        |             | 0.995983 | 863     |
| ENSGALT0000 non-SMC element 1 homolog (S. $\alpha$ NSMCE1 |             | 0.868886 | 469.5   |
| ENSGALT0000 non-SMC element 2, MMS21 homoc NSMCE2         |             | 0.878268 | 155     |
| ENSGALT0000 non-SMC element 4 homolog A (S. NSMCE4A       |             | 0.948134 | 456     |
| ENSGALT0000 nuclear speckle splicing regulatory NSRP1     |             | 0.828868 | 380.5   |
| ENSGALT0000 NOP2/Sun domain family, member NSUN2          |             | 0.963833 | 766     |
| ENSGALT0000 NOP2/Sun domain family, member NSUN3          |             | 0.994124 | 219.5   |
| ENSGALT0000 NOP2/Sun domain family, member NSUN4          |             | 0.704578 | 581.5   |
| ENSGALT0000 NOP2/Sun domain family, member NSUN5          |             | 0.773276 | 592.5   |
| ENSGALT0000 NOP2/Sun domain family, member NSUN6          |             | 0.973817 | 212     |
| ENSGALT0000 NOP2/Sun domain family, member NSUN7          |             | 0.992725 | 17.5    |
| ENSGALT0000 5'-nucleotidase, cytosolic IA                 | NT5C1A      | 0.880033 | 40      |
| ENSGALT0000 5'-nucleotidase, cytosolic IB                 | NT5C1B      | 0.970771 | 108     |
| ENSGALT0000 5'-nucleotidase, cytosolic II                 | NT5C2       | 0.936201 | 2653.5  |
| ENSGALT0000 5'-nucleotidase, cytosolic III                | NT5C3       | 0.981381 | 693.999 |
| ENSGALT0000 5'-nucleotidase, cytosolic III-like           | NT5C3L      | 0.831385 | 1785.5  |
| ENSGALT0000 5'-nucleotidase domain containing             | NT5DC1      | 0.992554 | 788.5   |
| ENSGALT0000 5'-nucleotidase domain containing             | NT5DC2      | 0.725455 | 4442    |
| ENSGALT0000 5'-nucleotidase domain containing             | NT5DC3      | 0.897381 | 137     |
| ENSGALT0000 5'-nucleotidase, ecto (CD73)                  | NT5E        | 0.261655 | 1       |
| ENSGALT0000 5',3'-nucleotidase, mitochondrial             | NT5M        | 0.955329 | 264.5   |
| ENSGALT0000 N-terminal asparagine amidase                 | NTAN1       | 0.860577 | 678.5   |
| ENSGALT0000 Neurotrophin-3                                | NTF3        | 0.910121 | 119.5   |
| ENSGALT0000 nth endonuclease III-like 1 (E. coli)         | NTHL1       | 0.762219 | 608     |
| ENSGALT0000 neurotrimin                                   | NTM         | 0.605852 | 735.409 |
| ENSGALT0000 netrin 1                                      | NTN1        | 0.5403   | 239.743 |
| ENSGALT0000 netrin 4                                      | NTN4        | 0.940482 | 42.5    |
| ENSGALT0000 netrin G1                                     | NTNG1       | 0.994178 | 653.5   |
| ENSGALT0000 netrin G2                                     | NTNG2       | 0.716263 | 397.5   |
| ENSGALT0000 nucleoside-triphosphatase, cancer-NTPCR       |             | 0.869592 | 555     |
| ENSGALT0000 neurotrophic tyrosine kinase, recep           | NTRK1       | 0.668012 | 30.602  |
| ENSGALT0000 neurotrophic tyrosine kinase, recep           | NTRK2       | 0.784431 | 1373    |
| ENSGALT0000 neurotrophic tyrosine kinase, recep           | NTRK3       | 0.728338 | 208.999 |
| ENSGALT0000 neurotensin                                   | NTS         | 0.983711 | 70      |
| ENSGALT0000 neurotensin receptor 1 (high affinity         | NTSR1       | 0.993262 | 12      |
| ENSGALT0000 NADH-ubiquinone oxidoreductase                | NU1M_CHICK  | 0.914268 | 74333   |
| ENSGALT0000 NADH-ubiquinone oxidoreductase                | NU2M_CHICK  | 0.911594 | 40521   |
| ENSGALT0000 NADH-ubiquinone oxidoreductase                | NU3M_CHICK  | 0.684336 | 15037   |
| ENSGALT0000 NADH-ubiquinone oxidoreductase                | NU4LM_CHICK | 0.88836  | 13438.5 |
| ENSGALT0000 NADH-ubiquinone oxidoreductase                | NU4M_CHICK  | 0.860309 | 82548.5 |
| ENSGALT0000 NADH-ubiquinone oxidoreductase                | NU5M_CHICK  | 0.91691  | 81766.5 |
| ENSGALT0000 NADH-ubiquinone oxidoreductase                | NU6M_CHICK  | 0.540486 | 25575   |
| ENSGALT0000 NUAK family, SNF1-like kinase, 1              | NUAK1       | 0.877673 | 979.5   |
| ENSGALT0000 NUAK family, SNF1-like kinase, 2              | NUAK2       | 0.710744 | 948.5   |
| ENSGALT0000 negative regulator of ubiquitin-like p        | NUB1        | 0.968439 | 549     |
| ENSGALT0000 nucleotide binding protein 1                  | NUBP1       | 0.711271 | 827.5   |
| ENSGALT0000 nucleotide binding protein 2                  | NUBP2       | 0.704305 | 918.5   |
| ENSGALT0000 nucleotide binding protein-like               | NUBPL       | 0.604464 | 476.5   |
| ENSGALT0000 nucleobindin 2                                | NUCB2       | 0.982342 | 1705.48 |
| ENSGALT0000 nuclear casein kinase and cyclin-d $\epsilon$ | NUCKS1      | 0.960335 | 2591    |
| ENSGALT0000 nuclear distribution gene C homolo            | NUDC        | 0.890308 | 4351    |
| ENSGALT0000 NudC domain containing 1                      | NUDCD1      | 0.791704 | 601.5   |
| ENSGALT0000 NudC domain containing 2                      | NUDCD2      | 0.813454 | 417     |
| ENSGALT0000 NudC domain containing 3                      | NUDCD3      | 0.787155 | 1415.5  |

|                                                  |              |          |         |
|--------------------------------------------------|--------------|----------|---------|
| ENSGALT0000 nudix (nucleoside diphosphate link   | NUDT1        | 0.409371 | 1814.5  |
| ENSGALT0000 nudix (nucleoside diphosphate link   | NUDT12       | 0.996715 | 185     |
| ENSGALT0000 nudix (nucleoside diphosphate link   | NUDT13       | 0.996303 | 198     |
| ENSGALT0000 nudix (nucleoside diphosphate link   | NUDT14       | 0.885072 | 1102    |
| ENSGALT0000 nudix (nucleoside diphosphate link   | NUDT15       | 0.46351  | 245     |
| ENSGALT0000 Nucleoside diphosphate-linked moi    | NUDT19       | 0.919882 | 154     |
| ENSGALT0000 nudix (nucleoside diphosphate link   | NUDT21       | 0.538303 | 1927    |
| ENSGALT0000 nudix (nucleoside diphosphate link   | NUDT3        | 0.785502 | 1281    |
| ENSGALT0000 nudix (nucleoside diphosphate link   | NUDT4        | 0.919345 | 830     |
| ENSGALT0000 nudix (nucleoside diphosphate link   | NUDT6        | 0.964849 | 214     |
| ENSGALT0000 nudix (nucleoside diphosphate link   | NUDT7        | 0.882359 | 203.595 |
| ENSGALT0000 nudix (nucleoside diphosphate link   | NUDT9        | 0.926435 | 694.5   |
| ENSGALT0000 NUF2, NDC80 kinetochore comple       | NUF2         | 0.867882 | 963.996 |
| ENSGALT0000 nuclear fragile X mental retardation | NUFIP1       | 0.968223 | 592.502 |
| ENSGALT0000 nuclear fragile X mental retardation | NUFIP2       | 0.936414 | 697     |
| ENSGALT0000 nuclear mitotic apparatus protein 1  | NUMA1        | 0.9772   | 3280    |
| ENSGALT0000 numb homolog (Drosophila)            | NUMB         | 0.995587 | 3020.5  |
| ENSGALT0000 nucleoporin 107kDa                   | NUP107       | 0.896374 | 2207.99 |
| ENSGALT0000 nucleoporin 133kDa                   | NUP133       | 0.901566 | 1423    |
| ENSGALT0000 nucleoporin 153kDa                   | NUP153       | 0.951549 | 2897.5  |
| ENSGALT0000 nucleoporin 155kDa                   | NUP155       | 0.950491 | 2542.5  |
| ENSGALT0000 nucleoporin 160kDa                   | NUP160       | 0.89562  | 4781.15 |
| ENSGALT0000 nucleoporin 188kDa                   | NUP188       | 0.978086 | 5309.01 |
| ENSGALT0000 nucleoporin 205kDa                   | NUP205       | 0.931969 | 5028.5  |
| ENSGALT0000 nucleoporin 210kDa                   | NUP210       | 0.968545 | 781     |
| ENSGALT0000 nucleoporin 210kDa-like              | NUP210L      | 0.927507 | 71.5    |
| ENSGALT0000 nucleoporin 214kDa                   | NUP214       | 0.952562 | 2333    |
| ENSGALT0000 nucleoporin 35kDa                    | NUP35        | 0.939442 | 502     |
| ENSGALT0000 nucleoporin 37kDa                    | NUP37        | 0.927115 | 1151    |
| ENSGALT0000 nucleoporin 43kDa                    | NUP43        | 0.887396 | 1220.5  |
| ENSGALT0000 nucleoporin 50kDa                    | NUP50        | 0.949526 | 2289.5  |
| ENSGALT0000 nucleoporin 54kDa                    | NUP54        | 0.965135 | 1048.5  |
| ENSGALT0000 nucleoporin 62kDa                    | NUP62        | 0.822648 | 1719    |
| ENSGALT0000 nucleoporin 85kDa                    | NUP85        | 0.922244 | 2903.57 |
| ENSGALT0000 nucleoporin 88kDa                    | NUP88        | 0.942898 | 1760    |
| ENSGALT0000 nucleoporin 93kDa                    | NUP93        | 0.948564 | 2652.55 |
| ENSGALT0000 nucleoporin 98kDa                    | NUP98        | 0.960956 | 4582.5  |
| ENSGALT0000 nucleoporin like 1                   | NUPL1        | 0.946032 | 1218.5  |
| ENSGALT0000 nucleoporin like 2                   | NUPL2        | 0.867631 | 567.947 |
| ENSGALT0000 nuclear undecaprenyl pyrophospha     | NUS1         | 0.557127 | 1109    |
| ENSGALT0000 nucleolar and spindle associated p   | NUSAP1       | 0.909074 | 827     |
| ENSGALT0000 nuclear transport factor 2           | NUTF2        | 0.7508   | 2372    |
| ENSGALT0000 nuclear VCP-like                     | NVL          | 0.927533 | 834.501 |
| ENSGALT0000 nucleoredoxin                        | NXN          | 0.976995 | 4298.5  |
| ENSGALT0000 nucleoredoxin-like 1                 | NXNL1        | 0.795827 | 116     |
| ENSGALT0000 neurexophilin 1                      | NXPH1        | 0.818796 | 285.5   |
| ENSGALT0000 neurexophilin 2                      | NXPH2        | 0.806276 | 6       |
| ENSGALT0000 neurexophilin 3                      | NXPH3        | 0.257569 | 13      |
| ENSGALT0000 nuclear transport factor 2-like expo | NXT2         | 0.964403 | 1035    |
| ENSGALT0000 nyctalopin                           | NYX          | 0.896215 | 6.5     |
| ENSGALT0000 Uncharacterized protein              | O42419_CHICK | 0.77406  | 134.452 |
| ENSGALT0000 Uncharacterized protein              | O57389_CHICK | 0.934795 | 400.5   |
| ENSGALT0000 Uncharacterized proteinVariant reti  | O57531_CHICK | ?        | 0       |
| ENSGALT0000 Uncharacterized protein              | O57651_CHICK | 0.652277 | 158     |
| ENSGALT0000 homeo box (expressed in ES cells)    | O73593_CHICK | 0.97928  | 54      |
| ENSGALT0000 Uncharacterized protein              | O73605_CHICK | 0.893267 | 4.5     |

|                                                    |              |          |         |
|----------------------------------------------------|--------------|----------|---------|
| ENSGALT0000 Uncharacterized protein                | O73607_CHICK | 0.239947 | 1       |
| ENSGALT0000 OAF homolog (Drosophila)               | OAF          | 0.880116 | 1391.5  |
| ENSGALT0000 2'-5'-oligoadenylate synthetase-like   | OASL         | 0.875842 | 153.5   |
| ENSGALT0000 ornithine aminotransferase             | OAT          | 0.828491 | 1686    |
| ENSGALT0000 ornithine decarboxylase antizyme 1     | OAZ1         | 0.767625 | 4684.46 |
| ENSGALT0000 oligonucleotide/oligosaccharide-bin    | OBFC1        | 0.970368 | 212.5   |
| ENSGALT0000 oligonucleotide/oligosaccharide-bin    | OBFC2A       | 0.862732 | 519.5   |
| ENSGALT0000 obscurin, cytoskeletal calmodulin a    | OBSCN        | 0.761391 | 41.5    |
| ENSGALT0000 obscurin-like 1                        | OBSL1        | 0.902038 | 43      |
| ENSGALT0000 otoconin 90                            | OC90         | 0.936542 | 60857.4 |
| ENSGALT0000 oculocutaneous albinism II             | OCA2         | 0.897055 | 186.5   |
| ENSGALT0000 OCIA domain containing 1               | OCIAD1       | 0.948576 | 787.5   |
| ENSGALT0000 oncomodulin 2                          | OCM2         | 0.227877 | 27.5    |
| ENSGALT0000 oculocerebrorenal syndrome of Lov      | OCRL         | 0.946682 | 1830.98 |
| ENSGALT0000 ornithine decarboxylase 1              | ODC1         | 0.881478 | 8439.08 |
| ENSGALT0000 outer dense fiber of sperm tails 2     | ODF2         | 0.907675 | 707     |
| ENSGALT0000 outer dense fiber of sperm tails 2-lil | ODF2L        | 0.798832 | 267.999 |
| ENSGALT0000 odz, odd Oz/ten-m homolog 1 (Dro:      | ODZ1         | 0.83428  | 498.002 |
| ENSGALT0000 odz, odd Oz/ten-m homolog 2 (Dro:      | ODZ2         | 0.867087 | 1247.33 |
| ENSGALT0000 odz, odd Oz/ten-m homolog 3 (Dro:      | ODZ3         | 0.994646 | 3544.06 |
| ENSGALT0000 odz, odd Oz/ten-m homolog 4 (Dro:      | ODZ4         | 0.946024 | 17174.3 |
| ENSGALT0000 orofacial cleft 1 candidate 1          | OFCC1        | 0.707664 | 1       |
| ENSGALT0000 oral-facial-digital syndrome 1         | OFD1         | 0.982833 | 586     |
| ENSGALT0000 ovoglycoprotein                        | OGCHI        | 0.562993 | 0.5     |
| ENSGALT0000 oxoglutarate (alpha-ketoglutarate) (   | OGDH         | 0.808313 | 3785.5  |
| ENSGALT0000 oxoglutarate dehydrogenase-like        | OGDHL        | 0.834648 | 414     |
| ENSGALT0000 2-oxoglutarate and iron-dependent      | OGFOD1       | 0.816305 | 1433    |
| ENSGALT0000 2-oxoglutarate and iron-dependent      | OGFOD2       | 0.950597 | 377     |
| ENSGALT0000 opioid growth factor receptor          | OGFR         | 0.924759 | 225.5   |
| ENSGALT0000 opioid growth factor receptor-like 1   | OGFRL1       | 0.977077 | 96      |
| ENSGALT0000 8-oxoguanine DNA glycosylase           | OGG1         | 0.562389 | 321.5   |
| ENSGALT0000 osteoglycin                            | OGN          | 0.55553  | 27      |
| ENSGALT0000 O-linked N-acetylglucosamine (Glc      | OGT          | 0.998047 | 16504.1 |
| ENSGALT0000 Opa interacting protein 5              | OIP5         | 0.775386 | 431.5   |
| ENSGALT0000 oncoprotein induced transcript 3       | OIT3         | 0.928858 | 134     |
| ENSGALT0000 Obg-like ATPase 1                      | OLA1         | 0.87019  | 1591.5  |
| ENSGALT0000 oleoyl-ACP hydrolase                   | OLAH         | 0.825994 | 3.5     |
| ENSGALT0000 Olfactory receptor-like protein COR    | OLF9_CHICK   | 0.663287 | 0.25    |
| ENSGALT0000 olfactomedin 1                         | OLFM1        | 0.7562   | 2466.97 |
| ENSGALT0000 olfactomedin 3                         | OLFM3        | 0.921841 | 500.5   |
| ENSGALT0000 olfactomedin 4                         | OLFM4        | 0.332911 | 217.5   |
| ENSGALT0000 olfactomedin-like 1                    | OLFML1       | 0.89236  | 17      |
| ENSGALT0000 olfactomedin-like 2A                   | OLFML2A      | 0.819808 | 1651.5  |
| ENSGALT0000 olfactomedin-like 2B                   | OLFML2B      | 0.495004 | 407.5   |
| ENSGALT0000 olfactomedin-like 3                    | OLFML3       | 0.487863 | 2077    |
| ENSGALT0000 oligodendrocyte transcription factor   | OLIG3        | 0.649519 | 0.5     |
| ENSGALT0000 OMA1 homolog, zinc metallopeptid       | OMA1         | 0.997214 | 722.5   |
| ENSGALT0000 oligodendrocyte myelin glycoprotein    | OMG          | 0.624347 | 9.5     |
| ENSGALT0000 optic atrophy 1 (autosomal domina      | OPA1         | 0.914383 | 1327.5  |
| ENSGALT0000 opioid binding protein/cell adhesio    | OPCML        | 0.785953 | 98.5929 |
| ENSGALT0000 oligophrenin 1                         | OPHN1        | 0.918205 | 1784    |
| ENSGALT0000 opsin 1 (cone pigments), long-wave     | OPN1LW       | 0.464758 | 0       |
| ENSGALT0000 opsin 3                                | OPN3         | 0.610369 | 3.5     |
| ENSGALT0000 opsin 4                                | OPN4         | 0.840509 | 1.5     |
| ENSGALT0000 photopigment melanopsin-like           | OPN4-1       | 0.53503  | 2       |
| ENSGALT0000 opsin 5                                | OPN5         | 0.73683  | 1       |

|                                                   |         |          |          |
|---------------------------------------------------|---------|----------|----------|
| ENSGALT0000 opioid receptor, delta 1              | OPRD1   | 0.902597 | 11.5     |
| ENSGALT0000 opioid receptor, kappa 1              | OPRK1   | 0.464758 | 0        |
| ENSGALT0000 opiate receptor-like 1                | OPRL1   | 0.948384 | 215.5    |
| ENSGALT0000 opticin                               | OPTC    | 0.538314 | 472      |
| ENSGALT0000 optineurin                            | OPTN    | 0.913795 | 1029.5   |
| ENSGALT0000 olfactory receptor, family 10, subfar | OR10A7  | ?        | 0        |
| ENSGALT0000 olfactory receptor, family 4, subfam  | OR4S2   | ?        | 0        |
| ENSGALT0000 olfactory receptor, family 51, subfar | OR51M1  | 0.649519 | 0        |
| ENSGALT0000 olfactory receptor, family 52, subfar | OR52R1  | 0.265683 | 1.39E-22 |
| ENSGALT0000 olfactory receptor, family 5, subfam  | OR5AS1  | 0.772317 | 0.25     |
| ENSGALT0000 olfactory receptor, family 6, subfam  | OR6B3   | 0.556215 | 0.46221  |
| ENSGALT0000 olfactory receptor, family 8, subfam  | OR8D4   | 0.638905 | 0.02137  |
| ENSGALT0000 olfactory receptor, family 9, subfam  | OR9Q1   | ?        | 0        |
| ENSGALT0000 ORAI calcium release-activated cal    | Orai1   | 0.840158 | 189      |
| ENSGALT0000 ORAI calcium release-activated cal    | Orai2   | 0.99724  | 1911     |
| ENSGALT0000 oral cancer overexpressed 1           | Oraov1  | 0.542454 | 331.501  |
| ENSGALT0000 origin recognition complex, subunit   | ORC1    | 0.875556 | 277      |
| ENSGALT0000 origin recognition complex, subunit   | ORC2    | 0.97778  | 344      |
| ENSGALT0000 origin recognition complex, subunit   | ORC3    | 0.910001 | 752.501  |
| ENSGALT0000 origin recognition complex, subunit   | ORC4    | 0.880763 | 1166.5   |
| ENSGALT0000 origin recognition complex, subunit   | ORC5    | 0.939579 | 511      |
| ENSGALT0000 origin recognition complex, subunit   | ORC6    | 0.788104 | 628.5    |
| ENSGALT0000 hypothetical protein LOC425059        | ORMDL2  | 0.921991 | 1866.03  |
| ENSGALT0000 ORM1-like 3 (S. cerevisiae)           | ORMDL3  | 0.996376 | 975.5    |
| ENSGALT0000 oxysterol binding protein             | OSBP    | 0.726747 | 794.5    |
| ENSGALT0000 oxysterol binding protein 2           | OSBP2   | 0.897788 | 1130     |
| ENSGALT0000 oxysterol binding protein-like 10     | OSBPL10 | 0.951958 | 1033     |
| ENSGALT0000 oxysterol binding protein-like 11     | OSBPL11 | 0.867478 | 886.5    |
| ENSGALT0000 oxysterol binding protein-like 1A     | OSBPL1A | 0.955483 | 951      |
| ENSGALT0000 oxysterol binding protein-like 2      | OSBPL2  | 0.930932 | 688      |
| ENSGALT0000 oxysterol binding protein-like 3      | OSBPL3  | 0.985257 | 256.001  |
| ENSGALT0000 oxysterol binding protein-like 5      | OSBPL5  | 0.93081  | 930      |
| ENSGALT0000 oxysterol binding protein-like 6      | OSBPL6  | 0.777838 | 234      |
| ENSGALT0000 oxysterol binding protein-like 8      | OSBPL8  | 0.780477 | 951      |
| ENSGALT0000 oxysterol binding protein-like 9      | OSBPL9  | 0.948815 | 1188     |
| ENSGALT0000 organic solute carrier partner 1      | OSCP1   | 0.862691 | 689.5    |
| ENSGALT0000 O-sialoglycoprotein endopeptidase     | OSGEPL1 | 0.969504 | 764.661  |
| ENSGALT0000 oxidative stress induced growth inh   | OSGIN1  | 0.971293 | 8.5      |
| ENSGALT0000 oxidative stress induced growth inh   | OSGIN2  | 0.886575 | 423      |
| ENSGALT0000 oncostatin M receptor                 | OSMR    | 0.865971 | 342      |
| ENSGALT0000 odd-skipped related 1 (Drosophila)    | OSR1    | 0.988495 | 65.5     |
| ENSGALT0000 odd-skipped related 2 (Drosophila)    | OSR2    | 0.940519 | 31       |
| ENSGALT0000 organic solute transporter beta       | OSTBETA | 0.305019 | 4.5      |
| ENSGALT0000 oligosaccharyltransferase complex     | OSTC    | 0.869538 | 1652     |
| ENSGALT0000 osteoclast stimulating factor 1       | OSTF1   | 0.90188  | 808.994  |
| ENSGALT0000 osteopetrosis associated transmem     | OSTM1   | 0.934352 | 1222.5   |
| ENSGALT0000 osteocrin                             | OSTN    | 0.207639 | 2        |
| ENSGALT0000 ornithine carbamoyltransferase        | OTC     | 0.966482 | 2        |
| ENSGALT0000 otoancorin                            | OTOA    | 0.852304 | 4024.5   |
| ENSGALT0000 otoferlin                             | OTOF    | 0.768561 | 1000     |
| ENSGALT0000 otogelin-like                         | OTOGL   | 0.871578 | 34119.8  |
| ENSGALT0000 otolin 1                              | OTOL1   | 0.141155 | 16       |
| ENSGALT0000 otopetrin 1                           | OTOP1   | 0.574134 | 3969.5   |
| ENSGALT0000 otopetrin 2                           | OTOP2   | 0.371997 | 2        |
| ENSGALT0000 otoraplin                             | OTOR    | 0.763131 | 4058.5   |
| ENSGALT0000 otospiralin                           | OTOS    | 0.996077 | 37.5     |

|                                                                              |              |           |         |
|------------------------------------------------------------------------------|--------------|-----------|---------|
| ENSGALT0000 OTU domain containing 1                                          | OTUD1        | 0.84876   | 422     |
| ENSGALT0000 OTU domain containing 3                                          | OTUD3        | 0.86535   | 443.5   |
| ENSGALT0000 OTU domain containing 4                                          | OTUD4        | 0.965291  | 1587    |
| ENSGALT0000 OTU domain containing 6B                                         | OTUD6B       | 0.90055   | 1369.5  |
| ENSGALT0000 OTU domain containing 7A                                         | OTUD7A       | 0.983147  | 182     |
| ENSGALT0000 OTU domain containing 7B                                         | OTUD7B       | 0.993198  | 843.5   |
| ENSGALT0000 orthodenticle homeobox 2                                         | OTX2         | 0.951837  | 251.5   |
| ENSGALT0000 ovochymase 2 (gene/pseudogene)                                   | OVCH2        | 0.979     | 44.5    |
| ENSGALT0000 ovo-like 2 (Drosophila)                                          | OVOL2        | 0.94445   | 190     |
| ENSGALT0000 oxidase (cytochrome c) assembly 1                                | OXA1L        | 0.689302  | 320     |
| ENSGALT0000 3-oxoacid CoA transferase 1                                      | OXCT1        | 0.817555  | 776.503 |
| ENSGALT0000 oxoglutarate (alpha-ketoglutarate) 1                             | OXGR1        | 0.649519  | 0       |
| ENSGALT0000 oxidoreductase NAD-binding domain                                | OXNAD1       | 0.867594  | 304     |
| ENSGALT0000 oxidation resistance 1                                           | OXR1         | 0.976064  | 738.5   |
| ENSGALT0000 3-oxoacyl-ACP synthase, mitochondrial                            | OXSM         | 0.968389  | 175.5   |
| ENSGALT0000 oxidative-stress responsive 1                                    | OXSR1        | 0.981863  | 1138.5  |
| ENSGALT0000 oxytocin, prepro- (neurophysin I)                                | OXT          | 0.53002   | 0.5     |
| ENSGALT0000 oxytocin receptor                                                | OXTR         | 0.745347  | 6       |
| ENSGALT0000 quiescence-specific protein                                      | P20K         | 0.0564264 | 167.5   |
| ENSGALT0000 purinergic receptor P2X, ligand-gated ion channel subunit 1      | P2RX1        | 0.464758  | 0       |
| ENSGALT0000 purinergic receptor P2X, ligand-gated ion channel subunit 3      | P2RX3        | 0.719481  | 481.5   |
| ENSGALT0000 purinergic receptor P2X, ligand-gated ion channel subunit 4      | P2RX4        | 0.991826  | 468.406 |
| ENSGALT0000 purinergic receptor P2X, ligand-gated ion channel subunit 5      | P2RX5        | 0.973331  | 315     |
| ENSGALT0000 purinergic receptor P2X, ligand-gated ion channel subunit 7      | P2RX7        | 0.939471  | 12      |
| ENSGALT0000 purinergic receptor P2Y, G-protein-coupled 1                     | P2RY1        | 0.773636  | 130     |
| ENSGALT0000 purinergic receptor P2Y, G-protein-coupled 10                    | P2RY10       | 0.464758  | 0       |
| ENSGALT0000 purinergic receptor P2Y, G-protein-coupled 12                    | P2RY12       | 0.683022  | 4       |
| ENSGALT0000 purinergic receptor P2Y, G-protein-coupled 13                    | P2RY13       | 0.272398  | 6       |
| ENSGALT0000 purinergic receptor P2Y, G-protein-coupled 14                    | P2RY14       | 0.90773   | 1.5     |
| ENSGALT0000 purinergic receptor P2Y, G-protein-coupled 2                     | P2RY2        | 0.824876  | 26      |
| ENSGALT0000 pyrimidinergic receptor P2Y, G-protein-coupled 6                 | P2RY6        | 0.78298   | 28      |
| ENSGALT0000 purinergic receptor P2Y, G-protein-coupled 8                     | P2RY8        | 0.865547  | 38.5    |
| ENSGALT0000 prolyl 4-hydroxylase, alpha polypeptide                          | P4HA1        | 0.973692  | 4420.33 |
| ENSGALT0000 procollagen-proline, 2-oxoglutarate 4-epimerase                  | P4HA2        | 0.944089  | 675.5   |
| ENSGALT0000 prolyl 4-hydroxylase, alpha polypeptide                          | P4HA3        | 0.881557  | 575     |
| ENSGALT0000 prolyl 4-hydroxylase, beta polypeptide                           | P4HB         | 0.991398  | 11461   |
| ENSGALT0000 prolyl 4-hydroxylase, transmembrane                              | P4HTM        | 0.966482  | 477.5   |
| ENSGALT0000 Connectin/titinUncharacterized protein                           | P79757_CHICK | 0.911638  | 8       |
| ENSGALT0000 proteasomal ATPase-associated factor 1                           | PAAF1        | 0.646114  | 741     |
| ENSGALT0000 poly(A) binding protein, cytoplasmic 1                           | PABPC1       | 0.983109  | 29276.1 |
| ENSGALT0000 poly(A) binding protein, cytoplasmic 1L                          | PABPC1L      | 0.967629  | 148.5   |
| ENSGALT0000 poly(A) binding protein, cytoplasmic 4                           | PABPC4       | 0.918982  | 1010.5  |
| ENSGALT0000 poly(A) binding protein, nuclear 1                               | PABPN1       | 0.968588  | 3.5     |
| ENSGALT0000 PARK2 co-regulated                                               | PACRG        | 0.875464  | 78      |
| ENSGALT0000 PARK2 co-regulated-like                                          | PACRGL       | 0.99694   | 229.353 |
| ENSGALT0000 phosphofurin acidic cluster sorting protein 1                    | PACS1        | 0.857     | 1496.5  |
| ENSGALT0000 phosphofurin acidic cluster sorting protein 2                    | PACS2        | 0.951246  | 1289.14 |
| ENSGALT0000 protein kinase C and casein kinase 2 domain-containing protein 1 | PACSIN1      | 0.722392  | 1631.5  |
| ENSGALT0000 protein kinase C and casein kinase 2 domain-containing protein 2 | PACSIN2      | 0.989473  | 1229.5  |
| ENSGALT0000 protein kinase C and casein kinase 2 domain-containing protein 3 | PACSIN3      | 0.964637  | 1764.5  |
| ENSGALT0000 peptidyl arginine deiminase, type I                              | PADI1        | 0.914671  | 27.0158 |
| ENSGALT0000 peptidyl arginine deiminase, type II                             | PADI2        | 0.942576  | 30.5    |
| ENSGALT0000 peptidyl arginine deiminase, type II                             | PADI3        | 0.726053  | 1721.48 |
| ENSGALT0000 platelet-activating factor acetylhydrolase 1B1                   | PAFAH1B1     | 0.899628  | 7156.5  |
| ENSGALT0000 platelet-activating factor acetylhydrolase 1B2                   | PAFAH1B2     | 0.886247  | 8613.19 |
| ENSGALT0000 platelet-activating factor acetylhydrolase 2                     | PAFAH2       | 0.994826  | 114.5   |

|             |                                      |         |          |         |
|-------------|--------------------------------------|---------|----------|---------|
| ENSGALT0000 | phosphoprotein associated with gly   | PAG1    | 0.871598 | 167.5   |
| ENSGALT0000 | phenylalanine hydroxylase            | PAH     | 0.631223 | 1.5     |
| ENSGALT0000 | phosphoribosylaminoimidazole car     | PAICS   | 0.948548 | 2184.5  |
| ENSGALT0000 | poly(A) binding protein interacting  | PAIP1   | 0.99295  | 1079    |
| ENSGALT0000 | poly(A) binding protein interacting  | PAIP2   | 0.921412 | 2748    |
| ENSGALT0000 | p21 protein (Cdc42/Rac)-activated    | PAK1    | 0.998837 | 1587.5  |
| ENSGALT0000 | PAK1 interacting protein 1           | PAK1IP1 | 0.911448 | 896     |
| ENSGALT0000 | p21 protein (Cdc42/Rac)-activated    | PAK2    | 0.992716 | 2030    |
| ENSGALT0000 | p21 protein (Cdc42/Rac)-activated    | PAK3    | 0.937577 | 1103.5  |
| ENSGALT0000 | p21 protein (Cdc42/Rac)-activated    | PAK4    | 0.722603 | 1851.5  |
| ENSGALT0000 | p21 protein (Cdc42/Rac)-activated    | PAK6    | 0.718681 | 12.5    |
| ENSGALT0000 | p21 protein (Cdc42/Rac)-activated    | PAK7    | 0.848842 | 437.001 |
| ENSGALT0000 | partner and localizer of BRCA2       | PALB2   | 0.996458 | 437.5   |
| ENSGALT0000 | palladin, cytoskeletal associated pr | PALLD   | 0.985147 | 5850.04 |
| ENSGALT0000 | paralemmin                           | PALM    | 0.663596 | 5381.66 |
| ENSGALT0000 | palmdelphin                          | PALMD   | 0.883183 | 10.5    |
| ENSGALT0000 | peptidylglycine alpha-amidating mc   | PAM     | 0.974502 | 829     |
| ENSGALT0000 | presequence translocase-associat     | PAM16   | 0.491637 | 494.39  |
| ENSGALT0000 | PAN3 poly(A) specific ribonuclease   | PAN3    | 0.999286 | 1381    |
| ENSGALT0000 | pantothenate kinase 1                | PANK1   | 0.940771 | 423.5   |
| ENSGALT0000 | pantothenate kinase 2                | PANK2   | 0.969138 | 548     |
| ENSGALT0000 | pantothenate kinase 3                | PANK3   | 0.928628 | 1495.45 |
| ENSGALT0000 | pantothenate kinase 4                | PANK4   | 0.952729 | 556.5   |
| ENSGALT0000 | pannexin 1                           | PANX1   | 0.813112 | 242.5   |
| ENSGALT0000 | pannexin 2                           | PANX2   | 0.862524 | 188.5   |
| ENSGALT0000 | pannexin 3                           | PANX3   | 0.974272 | 227.5   |
| ENSGALT0000 | polyamine oxidase (exo-N4-amino)     | PAOX    | 0.942872 | 539.5   |
| ENSGALT0000 | PAP associated domain containing     | PAPD4   | 0.990041 | 423     |
| ENSGALT0000 | PAP associated domain containing     | PAPD5   | 0.978983 | 543.5   |
| ENSGALT0000 | PAP associated domain containing     | PAPD7   | 0.9658   | 210.5   |
| ENSGALT0000 | papilin, proteoglycan-like sulfated  | PAPLN   | 0.918878 | 546.5   |
| ENSGALT0000 | poly(A) polymerase alpha             | PAPOLA  | 0.951772 | 2772.8  |
| ENSGALT0000 | poly(A) polymerase gamma             | PAPOLG  | 0.603682 | 0       |
| ENSGALT0000 | pregnancy-associated plasma prote    | PAPPA   | 0.754905 | 297.5   |
| ENSGALT0000 | pappalysin 2                         | PAPPA2  | 0.515425 | 14.5    |
| ENSGALT0000 | 3'-phosphoadenosine 5'-phosphos      | PAPSS1  | 0.996695 | 19619.5 |
| ENSGALT0000 | 3'-phosphoadenosine 5'-phosphos      | PAPSS2  | 0.991206 | 842     |
| ENSGALT0000 | progesterin and adipoQ receptor fam  | PAQR3   | 0.947804 | 500.5   |
| ENSGALT0000 | progesterin and adipoQ receptor fam  | PAQR5   | 0.788369 | 18      |
| ENSGALT0000 | progesterin and adipoQ receptor fam  | PAQR7   | 0.865209 | 57.5    |
| ENSGALT0000 | progesterin and adipoQ receptor fam  | PAQR8   | 0.957911 | 310.5   |
| ENSGALT0000 | progesterin and adipoQ receptor fam  | PAQR9   | 0.875138 | 116.5   |
| ENSGALT0000 | par-3 partitioning defective 3 homo  | PARD3   | 0.994246 | 1825    |
| ENSGALT0000 | par-3 partitioning defective 3 homo  | PARD3B  | 0.951108 | 336.5   |
| ENSGALT0000 | par-6 partitioning defective 6 homo  | PARD6A  | 0.691606 | 100     |
| ENSGALT0000 | par-6 partitioning defective 6 homo  | PARD6B  | 0.980227 | 217     |
| ENSGALT0000 | par-6 partitioning defective 6 homo  | PARD6G  | 0.954671 | 550     |
| ENSGALT0000 | poly (ADP-ribose) glycohydrolase     | PARG    | 0.968592 | 2558.03 |
| ENSGALT0000 | parkinson protein 2, E3 ubiquitin pr | PARK2   | 0.763065 | 43      |
| ENSGALT0000 | Parkinson disease (autosomal rece    | PARK7   | 0.698216 | 2743    |
| ENSGALT0000 | presenilin associated, rhomboid-lik  | PARL    | 0.813248 | 1217    |
| ENSGALT0000 | prostate androgen-regulated mucin    | PARM1   | 0.940992 | 67.5    |
| ENSGALT0000 | poly(A)-specific ribonuclease        | PARN    | 0.967215 | 712     |
| ENSGALT0000 | poly (ADP-ribose) polymerase 1       | PARP1   | 0.901086 | 6800.25 |
| ENSGALT0000 | poly (ADP-ribose) polymerase fami    | PARP11  | 0.991323 | 255     |
| ENSGALT0000 | poly (ADP-ribose) polymerase fami    | PARP12  | 0.996775 | 540.5   |

|                                                           |         |          |         |
|-----------------------------------------------------------|---------|----------|---------|
| ENSGALT0000 poly (ADP-ribose) polymerase fami PARP14      |         | 0.806694 | 66      |
| ENSGALT0000 poly (ADP-ribose) polymerase fami PARP16      |         | 0.903726 | 778     |
| ENSGALT0000 poly (ADP-ribose) polymerase fami PARP3       |         | 0.970307 | 291     |
| ENSGALT0000 poly (ADP-ribose) polymerase fami PARP4       |         | 0.987738 | 1628.5  |
| ENSGALT0000 poly (ADP-ribose) polymerase fami PARP6       |         | 0.770937 | 1173.5  |
| ENSGALT0000 poly (ADP-ribose) polymerase fami PARP8       |         | 0.809852 | 151.5   |
| ENSGALT0000 poly (ADP-ribose) polymerase fami PARP9       |         | 0.955926 | 166.5   |
| ENSGALT0000 parvin, alpha                                 | PARVA   | 0.979359 | 212     |
| ENSGALT0000 parvin, beta                                  | PARVB   | 0.851398 | 1141    |
| ENSGALT0000 parvin, gamma                                 | PARVG   | 0.881463 | 12      |
| ENSGALT0000 PAS domain containing serine/thre             | PASK    | 0.999919 | 506     |
| ENSGALT0000 protein associated with topoisomer            | PATL2   | 0.950599 | 69.5    |
| ENSGALT0000 POZ (BTB) and AT hook containing              | PATZ1   | 0.988087 | 2221    |
| ENSGALT0000 PRKC, apoptosis, WT1, regulator               | PAWR    | 0.987542 | 788.5   |
| ENSGALT0000 paired box 2                                  | PAX2    | 0.766095 | 2243.48 |
| ENSGALT0000 paired box 5                                  | PAX5    | ?        | 0       |
| ENSGALT0000 paired box 6                                  | PAX6    | 0.887839 | 5       |
| ENSGALT0000 paired box 7                                  | PAX7    | 0.756654 | 1       |
| ENSGALT0000 paired box 9                                  | PAX9    | 0.96002  | 26.5    |
| ENSGALT0000 PAX interacting (with transcription- $\alpha$ | PAXIP1  | 0.969779 | 538.5   |
| ENSGALT0000 PDZ binding kinase                            | PBK     | 0.861364 | 1337    |
| ENSGALT0000 phenazine biosynthesis-like protein           | PBLD    | 0.830627 | 108.5   |
| ENSGALT0000 polybromo 1                                   | PBRM1   | 0.959162 | 3597    |
| ENSGALT0000 pre-B-cell leukemia homeobox 1                | PBX1    | 0.963183 | 4288.91 |
| ENSGALT0000 pre-B-cell leukemia homeobox 3                | PBX3    | 0.938805 | 1155    |
| ENSGALT0000 pre-B-cell leukemia homeobox 4                | PBX4    | 0.875995 | 1102    |
| ENSGALT0000 pterin-4 alpha-carbinolamine dehy             | PCBD2   | 0.747705 | 332     |
| ENSGALT0000 poly(rC) binding protein 3                    | PCBP3   | 0.567533 | 691.502 |
| ENSGALT0000 propionyl CoA carboxylase, alpha $\beta$      | PCCA    | 0.841741 | 914.999 |
| ENSGALT0000 propionyl CoA carboxylase, beta $\beta$       | PCCB    | 0.941671 | 1773.5  |
| ENSGALT0000 protocadherin 1                               | PCDH1   | 0.819082 | 819.006 |
| ENSGALT0000 protocadherin 10                              | PCDH10  | 0.990295 | 1836.49 |
| ENSGALT0000 protocadherin 12                              | PCDH12  | 0.846098 | 423.5   |
| ENSGALT0000 protocadherin-related 15                      | PCDH15  | 0.674807 | 84.5    |
| ENSGALT0000 protocadherin 17                              | PCDH17  | 0.919669 | 5087.48 |
| ENSGALT0000 protocadherin 18                              | PCDH18  | 0.869792 | 830     |
| ENSGALT0000 protocadherin 20                              | PCDH20  | 0.997638 | 318     |
| ENSGALT0000 protocadherin 7                               | PCDH7   | 0.939431 | 1699    |
| ENSGALT0000 protocadherin 8                               | PCDH8   | 0.870105 | 719     |
| ENSGALT0000 protocadherin 9                               | PCDH9   | 0.949114 | 342.5   |
| ENSGALT0000 protocadherin alpha subfamily C, 2            | PCDHAC2 | 0.755781 | 468.001 |
| ENSGALT0000 primary ciliary dyskinesia protein 1          | PCDP1   | 0.861461 | 14      |
| ENSGALT0000 PCF11, cleavage and polyadenylat              | PCF11   | 0.988835 | 1512.92 |
| ENSGALT0000 polycomb group ring finger 2                  | PCGF2   | 0.82653  | 311.499 |
| ENSGALT0000 polycomb group ring finger 3                  | PCGF3   | 0.996584 | 519.5   |
| ENSGALT0000 polycomb group ring finger 5                  | PCGF5   | 0.96839  | 81.5    |
| ENSGALT0000 polycomb group ring finger 6                  | PCGF6   | 0.946728 | 447     |
| ENSGALT0000 PC1 domain containing 2                       | PCID2   | 0.946561 | 1329    |
| ENSGALT0000 PDX1 C-terminal inhibiting factor 1           | PCIF1   | 0.937714 | 2501    |
| ENSGALT0000 phosphoenolpyruvate carboxykinas              | PCK1    | 0.155413 | 12      |
| ENSGALT0000 phosphoenolpyruvate carboxykinas              | PCK2    | 0.932639 | 900     |
| ENSGALT0000 piccolo (presynaptic cytomatrix pro           | PCLO    | 0.813605 | 499.002 |
| ENSGALT0000 pericentriolar material 1                     | PCM1    | 0.971046 | 3717.84 |
| ENSGALT0000 protein-L-isoaspartate (D-aspartate           | PCMT1   | 0.923985 | 1934.02 |
| ENSGALT0000 protein-L-isoaspartate (D-aspartate           | PCMTD1  | 0.974383 | 1151    |
| ENSGALT0000 protein-L-isoaspartate (D-aspartate           | PCMTD2  | 0.994802 | 708.5   |

|             |                                      |          |          |         |
|-------------|--------------------------------------|----------|----------|---------|
| ENSGALT0000 | proliferating cell nuclear antigen   | PCNA     | 0.721636 | 7032.01 |
| ENSGALT0000 | PEST proteolytic signal containing   | PCNP     | 0.95154  | 2332.5  |
| ENSGALT0000 | pericentrin                          | PCNT     | 0.99262  | 2256.5  |
| ENSGALT0000 | pecanex-like 2 (Drosophila)          | PCNXL2   | 0.959233 | 1402.5  |
| ENSGALT0000 | procollagen C-endopeptidase enha     | PCOLCE2  | 0.935241 | 37.5    |
| ENSGALT0000 | Purkinje cell protein 4              | PCP4     | 0.960636 | 814     |
| ENSGALT0000 | proprotein convertase subtilisin/kex | PCSK2    | 0.810685 | 523     |
| ENSGALT0000 | proprotein convertase subtilisin/kex | PCSK5    | 0.97123  | 803.993 |
| ENSGALT0000 | proprotein convertase subtilisin/kex | PCSK6    | 0.99382  | 430.5   |
| ENSGALT0000 | proprotein convertase subtilisin/kex | PCSK7    | 0.932547 | 1139.35 |
| ENSGALT0000 | proprotein convertase subtilisin/kex | PCSK9    | 0.904804 | 1       |
| ENSGALT0000 | PCTAIRE protein kinase 3             | PCTK3    | 0.985857 | 510.5   |
| ENSGALT0000 | phosphatidylcholine transfer proteir | PCTP     | 0.977992 | 243.5   |
| ENSGALT0000 | prenylcysteine oxidase 1             | PCYOX1   | 0.980294 | 947.344 |
| ENSGALT0000 | prenylcysteine oxidase 1 like        | PCYOX1L  | 0.868323 | 1777.31 |
| ENSGALT0000 | phosphate cytidyltransferase 1, cl   | PCYT1A   | 0.907045 | 843     |
| ENSGALT0000 | phosphate cytidyltransferase 1, cl   | PCYT1B   | 0.934419 | 238.5   |
| ENSGALT0000 | sirtuin 7                            | PCYT2    | 0.835589 | 1906.1  |
| ENSGALT0000 | PDGFA associated protein 1           | PDAP1    | 0.900453 | 2674    |
| ENSGALT0000 | phosducin                            | PDC      | 0.740073 | 2       |
| ENSGALT0000 | programmed cell death 1              | PDCD1    | 0.412004 | 1       |
| ENSGALT0000 | programmed cell death 10             | PDCD10   | 0.987973 | 686.5   |
| ENSGALT0000 | programmed cell death 11             | PDCD11   | 0.968674 | 2231.5  |
| ENSGALT0000 | programmed cell death 1 ligand 2     | PDCD1LG2 | 0.96481  | 13.5    |
| ENSGALT0000 | programmed cell death 2              | PDCD2    | 0.738114 | 287.5   |
| ENSGALT0000 | programmed cell death 2-like         | PDCD2L   | 0.915727 | 488     |
| ENSGALT0000 | programmed cell death 4 (neoplast    | PDCD4    | 0.980347 | 3807.5  |
| ENSGALT0000 | programmed cell death 5              | PDCD5    | 0.848352 | 1769    |
| ENSGALT0000 | programmed cell death 6              | PDCD6    | 0.945697 | 914     |
| ENSGALT0000 | programmed cell death 6 interactin   | PDCD6IP  | 0.957256 | 3660.91 |
| ENSGALT0000 | programmed cell death 7              | PDCD7    | 0.875845 | 565.5   |
| ENSGALT0000 | phosducin-like                       | PDCL     | 0.891037 | 793.5   |
| ENSGALT0000 | phosducin-like 2                     | PDCL2    | 0.995569 | 25.5    |
| ENSGALT0000 | phosducin-like 3                     | PDCL3    | 0.85134  | 1921    |
| ENSGALT0000 | Parkinson disease 7 domain contai    | PDDC1    | 0.759392 | 787     |
| ENSGALT0000 | phosphodiesterase 10A                | PDE10A   | 0.989166 | 589.5   |
| ENSGALT0000 | phosphodiesterase 11A                | PDE11A   | 0.811977 | 89      |
| ENSGALT0000 | phosphodiesterase 12                 | PDE12    | 0.831852 | 692     |
| ENSGALT0000 | phosphodiesterase 1A, calmodulin-    | PDE1A    | 0.747454 | 14      |
| ENSGALT0000 | phosphodiesterase 1C, calmodulin-    | PDE1C    | 0.750693 | 240     |
| ENSGALT0000 | phosphodiesterase 3A, cGMP-inhit     | PDE3A    | 0.987246 | 553.5   |
| ENSGALT0000 | phosphodiesterase 3B, cGMP-inhit     | PDE3B    | 0.901538 | 582.499 |
| ENSGALT0000 | phosphodiesterase 4B, cAMP-spec      | PDE4B    | 0.844614 | 450.5   |
| ENSGALT0000 | phosphodiesterase 4D, cAMP-spec      | PDE4D    | 0.875365 | 264     |
| ENSGALT0000 | phosphodiesterase 5A, cGMP-spec      | PDE5A    | 0.85598  | 636.496 |
| ENSGALT0000 | phosphodiesterase 6B, cGMP-spec      | PDE6B    | 1        | 2       |
| ENSGALT0000 | phosphodiesterase 6C, cGMP-spec      | PDE6C    | 0.977749 | 13.5    |
| ENSGALT0000 | phosphodiesterase 6D, cGMP-spec      | PDE6D    | 0.933288 | 365     |
| ENSGALT0000 | phosphodiesterase 6G, cGMP-spec      | PDE6G    | 0.95829  | 49.5    |
| ENSGALT0000 | phosphodiesterase 6H, cGMP-spec      | PDE6H    | 0.998454 | 7.5     |
| ENSGALT0000 | phosphodiesterase 7A                 | PDE7A    | 0.958683 | 834     |
| ENSGALT0000 | phosphodiesterase 7B                 | PDE7B    | 0.828645 | 77.5    |
| ENSGALT0000 | phosphodiesterase 8A                 | PDE8A    | 0.886882 | 232.5   |
| ENSGALT0000 | phosphodiesterase 8B                 | PDE8B    | 0.857455 | 15      |
| ENSGALT0000 | phosphodiesterase 9A                 | PDE9A    | 0.604503 | 84.5    |
| ENSGALT0000 | platelet-derived growth factor alpha | PDGFA    | 0.978624 | 1096    |



|             |                                             |          |         |
|-------------|---------------------------------------------|----------|---------|
| ENSGALT0000 | platelet-derived growth factor beta   PDGFB | 0.864505 | 98.5    |
| ENSGALT0000 | platelet derived growth factor C PDGFC      | 0.857096 | 219.5   |
| ENSGALT0000 | platelet derived growth factor D PDGFD      | 0.805113 | 184     |
| ENSGALT0000 | platelet-derived growth factor recep PDGFRA | 0.992438 | 757.996 |
| ENSGALT0000 | platelet-derived growth factor recep PDGFRB | 0.936026 | 642     |
| ENSGALT0000 | platelet-derived growth factor recep PDGFRL | 0.82077  | 479     |
| ENSGALT0000 | pyruvate dehydrogenase (lipoamid PDHA1      | 0.792519 | 1344.5  |
| ENSGALT0000 | pyruvate dehydrogenase (lipoamid PDHB       | 0.87917  | 3671    |
| ENSGALT0000 | pyruvate dehydrogenase complex, PDHX        | 0.955871 | 200.379 |
| ENSGALT0000 | protein disulfide isomerase family A PDIA3  | 0.942333 | 23334   |
| ENSGALT0000 | protein disulfide isomerase family A PDIA4  | 0.937411 | 6215.5  |
| ENSGALT0000 | protein disulfide isomerase family A PDIA5  | 0.973845 | 1097    |
| ENSGALT0000 | protein disulfide isomerase family A PDIA6  | 0.946145 | 11167.9 |
| ENSGALT0000 | PDLIM1 interacting kinase 1 like PDIK1L     | 0.985268 | 317     |
| ENSGALT0000 | pyruvate dehydrogenase kinase, is PDK1      | 0.927082 | 1249.5  |
| ENSGALT0000 | pyruvate dehydrogenase kinase, is PDK3      | 0.958353 | 1397.5  |
| ENSGALT0000 | pyruvate dehydrogenase kinase, is PDK4      | 0.856562 | 41.5    |
| ENSGALT0000 | PDZ and LIM domain 1 PDLIM1                 | 0.483049 | 255     |
| ENSGALT0000 | PDZ and LIM domain 3 PDLIM3                 | 0.361671 | 3.5     |
| ENSGALT0000 | PDZ and LIM domain 4 PDLIM4                 | 0.927184 | 2166.99 |
| ENSGALT0000 | PDZ and LIM domain 5 PDLIM5                 | 0.958359 | 980.505 |
| ENSGALT0000 | pyruvate dehydrogenase phosphata PDP2       | 0.942798 | 326     |
| ENSGALT0000 | 3-phosphoinositide dependent prot PDPK1     | 0.967846 | 3553.03 |
| ENSGALT0000 | podoplanin PDPN                             | 0.950807 | 16      |
| ENSGALT0000 | pyruvate dehydrogenase phosphat PDPR        | 0.982598 | 1168.5  |
| ENSGALT0000 | p53 and DNA-damage regulated 1 PDRG1        | 0.497249 | 1217    |
| ENSGALT0000 | PDS5, regulator of cohesion mainte PDS5A    | 0.987685 | 2368    |
| ENSGALT0000 | PDS5, regulator of cohesion mainte PDS5B    | 0.927343 | 1479.97 |
| ENSGALT0000 | prenyl (decaprenyl) diphosphate sy PDSS1    | 0.791893 | 607.5   |
| ENSGALT0000 | prenyl (decaprenyl) diphosphate sy PDSS2    | 0.940725 | 570.497 |
| ENSGALT0000 | pancreatic and duodenal homeobo PDX1        | ?        | 0       |
| ENSGALT0000 | pyridoxal-dependent decarboxylase PDXDC1    | 0.98723  | 948.5   |
| ENSGALT0000 | pyridoxal (pyridoxine, vitamin B6) k PDXK   | 0.967886 | 248.5   |
| ENSGALT0000 | pyridoxal (pyridoxine, vitamin B6) p PDXP   | 0.370111 | 367.865 |
| ENSGALT0000 | PDZ domain containing 11 PDZD11             | 0.910512 | 2231.5  |
| ENSGALT0000 | PDZ domain containing 3 PDZD3               | 0.999183 | 615.857 |
| ENSGALT0000 | PDZ domain containing 7 PDZD7               | 0.943033 | 1041.5  |
| ENSGALT0000 | PDZ domain containing 8 PDZD8               | 0.963846 | 823.5   |
| ENSGALT0000 | PDZ domain containing 1 PDZK1               | 0.882707 | 38.2827 |
| ENSGALT0000 | PDZK1 interacting protein 1 PDZK1IP1        | 0.506721 | 4.5     |
| ENSGALT0000 | PDZ domain containing RING finge PDZRN3     | 0.859496 | 825     |
| ENSGALT0000 | PDZ domain containing RING finge PDZRN4     | 0.995753 | 426.997 |
| ENSGALT0000 | phosphatidylethanolamine binding PEBP1      | 0.698734 | 16940   |
| ENSGALT0000 | peroxisomal trans-2-enoyl-CoA red PECR      | 0.850659 | 434     |
| ENSGALT0000 | penta-EF-hand domain containing PEF1        | 0.828315 | 2280    |
| ENSGALT0000 | pellino homolog 1 (Drosophila) PELI1        | 0.945316 | 3559.06 |
| ENSGALT0000 | pellino homolog 2 (Drosophila) PELI2        | 0.94739  | 420.5   |
| ENSGALT0000 | pelota homolog PELO                         | 0.634156 | 947.012 |
| ENSGALT0000 | phosphatidylethanolamine N-methy PEMT       | 0.96665  | 2750.02 |
| ENSGALT0000 | proenkephalin PENK                          | 0.331699 | 99.5    |
| ENSGALT0000 | Twinkle protein, mitochondrial PEO1_CHICK   | 0.798467 | 1028    |
| ENSGALT0000 | period homolog 2 (Drosophila) PER2          | 0.977202 | 977.497 |
| ENSGALT0000 | period homolog 3 (Drosophila) PER3          | 0.99508  | 555.001 |
| ENSGALT0000 | PERP, TP53 apoptosis effector PERP          | 0.957896 | 261.5   |
| ENSGALT0000 | pescadillo homolog 1, containing B PES1     | 0.91596  | 4103    |
| ENSGALT0000 | PET112 homolog (yeast) PET112               | 0.974969 | 514.5   |

|             |                                      |         |          |         |
|-------------|--------------------------------------|---------|----------|---------|
| ENSGALT0000 | peroxisomal biogenesis factor 1      | PEX1    | 0.989013 | 569     |
| ENSGALT0000 | peroxisomal biogenesis factor 10     | PEX10   | 0.897638 | 765.5   |
| ENSGALT0000 | peroxisomal biogenesis factor 11 a   | PEX11A  | 0.99944  | 93      |
| ENSGALT0000 | peroxisomal biogenesis factor 11 g   | PEX11G  | 0.949076 | 592.5   |
| ENSGALT0000 | peroxisomal biogenesis factor 12     | PEX12   | 0.957012 | 287     |
| ENSGALT0000 | peroxisomal biogenesis factor 13     | PEX13   | 0.966765 | 666.5   |
| ENSGALT0000 | peroxisomal biogenesis factor 14     | PEX14   | 0.91321  | 711     |
| ENSGALT0000 | peroxisomal biogenesis factor 16     | PEX16   | 0.956795 | 1254.21 |
| ENSGALT0000 | peroxisomal biogenesis factor 2      | PEX2    | 0.970004 | 945.5   |
| ENSGALT0000 | peroxisomal biogenesis factor 3      | PEX3    | 0.946346 | 802.5   |
| ENSGALT0000 | peroxisomal biogenesis factor 5      | PEX5    | 0.973025 | 1368.51 |
| ENSGALT0000 | peroxisomal biogenesis factor 5-like | PEX5L   | 0.996477 | 11      |
| ENSGALT0000 | peroxisomal biogenesis factor 6      | PEX6    | 0.990406 | 2652.5  |
| ENSGALT0000 | peroxisomal biogenesis factor 7      | PEX7    | 0.893959 | 247.5   |
| ENSGALT0000 | prefoldin subunit 1                  | PFDN1   | 0.251092 | 2162.5  |
| ENSGALT0000 | prefoldin subunit 4                  | PFDN4   | 0.859653 | 800     |
| ENSGALT0000 | prefoldin subunit 5                  | PFDN5   | 0.789428 | 1368    |
| ENSGALT0000 | 6-phosphofructo-2-kinase/fructose-   | PFKFB1  | 0.738743 | 316     |
| ENSGALT0000 | 6-phosphofructo-2-kinase/fructose-   | PFKFB2  | 0.980902 | 302     |
| ENSGALT0000 | 6-phosphofructo-2-kinase/fructose-   | PFKFB3  | 0.941045 | 1399.5  |
| ENSGALT0000 | 6-phosphofructo-2-kinase/fructose-   | PFKFB4  | 0.92025  | 671     |
| ENSGALT0000 | phosphofructokinase, liver           | PFKL    | 0.778208 | 4688.33 |
| ENSGALT0000 | muscle phosphofructokinase           | PFKM    | 0.750493 | 70      |
| ENSGALT0000 | phosphofructokinase, platelet        | PFKP    | 0.929972 | 3870.98 |
| ENSGALT0000 | profilin 2                           | PFN2    | 0.931134 | 13217   |
| ENSGALT0000 | profilin 3                           | PFN3    | 0.457515 | 1       |
| ENSGALT0000 | profilin family, member 4            | PFN4    | 0.889925 | 86      |
| ENSGALT0000 | pepsinogen 5, group I (pepsinogen    | PGA     | 0.952761 | 3       |
| ENSGALT0000 | phosphoglycerate mutase 1 (brain)    | PGAM1   | 0.966406 | 25977.5 |
| ENSGALT0000 | phosphoglycerate mutase family m     | PGAM5   | 0.918622 | 965.163 |
| ENSGALT0000 | post-GPI attachment to proteins 1    | PGAP1   | 0.959978 | 470.5   |
| ENSGALT0000 | post-GPI attachment to proteins 3    | PGAP3   | 0.874521 | 584.5   |
| ENSGALT0000 | piggyBac transposable element de     | PGBD5   | 0.726803 | 153     |
| ENSGALT0000 | progastricsin (pepsinogen C)         | PGC     | 0.949526 | 60      |
| ENSGALT0000 | 6-phosphogluconate dehydrogenas      | PGD     | 0.823931 | 2760.5  |
| ENSGALT0000 | protein geranylgeranyltransferase t  | PGGT1B  | 0.950166 | 281     |
| ENSGALT0000 | phosphoglycerate kinase 1            | PGK1    | 0.893314 | 15722.5 |
| ENSGALT0000 | phosphoglucomutase 1                 | PGM1    | 0.944486 | 2317.46 |
| ENSGALT0000 | phosphoglucomutase 2                 | PGM2    | 0.863114 | 724.517 |
| ENSGALT0000 | phosphoglucomutase 2-like 1          | PGM2L1  | 0.728143 | 283.5   |
| ENSGALT0000 | phosphoglucomutase 3                 | PGM3    | 0.994837 | 1148.5  |
| ENSGALT0000 | phosphoglucomutase 5                 | PGM5    | 0.927974 | 161     |
| ENSGALT0000 | phosphoglycolate phosphatase         | PGP     | 0.733895 | 400.5   |
| ENSGALT0000 | pyroglutamyl-peptidase I             | PGPEP1  | 0.900965 | 304     |
| ENSGALT0000 | pyroglutamyl-peptidase I-like        | PGPEP1L | 0.899728 | 4.5     |
| ENSGALT0000 | progesterone receptor                | PGR     | 0.877776 | 99.5    |
| ENSGALT0000 | progesterone receptor membrane c     | PGRMC1  | 0.970201 | 4309.01 |
| ENSGALT0000 | progesterone receptor membrane c     | PGRMC2  | 0.859322 | 834.5   |
| ENSGALT0000 | phosphatidylglycerophosphate syn     | PGS1    | 0.982554 | 1907.58 |
| ENSGALT0000 | phosphatase and actin regulator 1    | PHACTR1 | 0.80062  | 90      |
| ENSGALT0000 | phosphatase and actin regulator 2    | PHACTR2 | 0.877954 | 613.5   |
| ENSGALT0000 | phosphatase and actin regulator 3    | PHACTR3 | 0.858744 | 726     |
| ENSGALT0000 | phosphatase and actin regulator 4    | PHACTR4 | 0.9929   | 2090    |
| ENSGALT0000 | phosphorylated adaptor for RNA ex    | PHAX    | 0.952137 | 923.5   |
| ENSGALT0000 | Prohibitin                           | PHB     | 0.625605 | 3235.47 |
| ENSGALT0000 | prohibitin 2                         | PHB2    | 0.864026 | 6323.8  |

|                                                   |          |          |         |
|---------------------------------------------------|----------|----------|---------|
| ENSGALT0000 polyhomeotic homolog 1 (Drosophi      | PHC1     | 0.976755 | 2235.58 |
| ENSGALT0000 polyhomeotic homolog 3 (Drosophi      | PHC3     | 0.977162 | 263.5   |
| ENSGALT0000 phosphate regulating endopeptidas     | PHEX     | 0.758417 | 24      |
| ENSGALT0000 PHD finger protein 10                 | PHF10    | 0.974097 | 676.5   |
| ENSGALT0000 PHD finger protein 11                 | PHF11    | 0.938773 | 280     |
| ENSGALT0000 PHD finger protein 12                 | PHF12    | 0.989258 | 3812.5  |
| ENSGALT0000 PHD finger protein 13                 | PHF13    | 0.940771 | 662     |
| ENSGALT0000 PHD finger protein 14                 | PHF14    | 0.89015  | 1544.5  |
| ENSGALT0000 PHD finger protein 15                 | PHF15    | 0.938094 | 197     |
| ENSGALT0000 PHD finger protein 16                 | PHF16    | 0.973192 | 1641    |
| ENSGALT0000 PHD finger protein 17                 | PHF17    | 0.992752 | 440.5   |
| ENSGALT0000 PHD finger protein 19                 | PHF19    | 0.870098 | 42      |
| ENSGALT0000 PHD finger protein 2                  | PHF2     | 0.937156 | 671     |
| ENSGALT0000 PHD finger protein 20                 | PHF20    | 0.951931 | 1640    |
| ENSGALT0000 PHD finger protein 20-like 1          | PHF20L1  | 0.97725  | 1333.5  |
| ENSGALT0000 PHD finger protein 21A                | PHF21A   | 0.997703 | 1402    |
| ENSGALT0000 PHD finger protein 21B                | PHF21B   | 0.775441 | 106     |
| ENSGALT0000 PHD finger protein 3                  | PHF3     | 0.979704 | 2125    |
| ENSGALT0000 PHD finger protein 5A                 | PHF5A    | 0.552207 | 2442.5  |
| ENSGALT0000 PHD finger protein 6                  | PHF6     | 0.982645 | 1023.5  |
| ENSGALT0000 phosphoglycerate dehydrogenase        | PHGDH    | 0.217853 | 1277.5  |
| ENSGALT0000 pleckstrin homology domain interac    | PHIP     | 0.987576 | 1955    |
| ENSGALT0000 phosphorylase kinase, alpha 1 (mu     | PKA1     | 0.980536 | 3686.43 |
| ENSGALT0000 phosphorylase kinase, alpha 2 (live   | PKA2     | 0.957626 | 873     |
| ENSGALT0000 phosphorylase kinase, beta            | PKB      | 0.988094 | 1828.5  |
| ENSGALT0000 phosphorylase kinase, gamma 1 (n      | PKG1     | 0.843122 | 2461.5  |
| ENSGALT0000 pleckstrin homology-like domain, fa   | PHLDA2   | 0.418535 | 266.5   |
| ENSGALT0000 pleckstrin homology-like domain, fa   | PHLDA3   | 0.649519 | 0.5     |
| ENSGALT0000 pleckstrin homology-like domain, fa   | PHLDB1   | 0.952448 | 1437.5  |
| ENSGALT0000 pleckstrin homology-like domain, fa   | PHLDB2   | 0.864754 | 948     |
| ENSGALT0000 PH domain and leucine rich repeat     | PHLPP1   | 0.962134 | 732.5   |
| ENSGALT0000 PH domain and leucine rich repeat     | PHLPP2   | 0.984469 | 1232.55 |
| ENSGALT0000 phosphatase, orphan 1                 | PHOSPHO1 | 0.901522 | 27      |
| ENSGALT0000 phosphatase, orphan 2                 | PHOSPHO2 | 0.9793   | 156     |
| ENSGALT0000 paired-like homeobox 2b               | PHOX2B   | 0.616957 | 0.5     |
| ENSGALT0000 phosphohistidine phosphatase 1        | PHPT1    | 0.134103 | 2188    |
| ENSGALT0000 PHD and ring finger domains 1         | PHRF1    | 0.962208 | 673.5   |
| ENSGALT0000 putative homeodomain transcriptio     | PHTF1    | 0.968267 | 1582    |
| ENSGALT0000 putative homeodomain transcriptio     | PHTF2    | 0.975521 | 751.494 |
| ENSGALT0000 phytanoyl-CoA 2-hydroxylase           | PHYH     | 0.908848 | 326     |
| ENSGALT0000 phytanoyl-CoA dioxygenase domai       | PHYHD1   | 0.775036 | 106.5   |
| ENSGALT0000 phytanoyl-CoA 2-hydroxylase inter     | PHYHIPL  | 0.615999 | 173.5   |
| ENSGALT0000 peptidase inhibitor 15                | PI15     | 0.989781 | 73.0001 |
| ENSGALT0000 peptidase inhibitor 16                | PI16     | 0.985038 | 2.5     |
| ENSGALT0000 phosphatidylinositol 4-kinase type 2  | PI4K2A   | 0.852431 | 739.5   |
| ENSGALT0000 phosphatidylinositol 4-kinase type 2  | PI4K2B   | 0.996273 | 638.5   |
| ENSGALT0000 phosphatidylinositol 4-kinase, catal  | PI4KA    | 0.97364  | 3889.5  |
| ENSGALT0000 phosphatidylinositol 4-kinase, catal  | PI4KB    | 0.908513 | 2688    |
| ENSGALT0000 protein inhibitor of activated STAT,  | PIAS1    | 0.939236 | 755.006 |
| ENSGALT0000 protein inhibitor of activated STAT,  | PIAS2    | 0.973499 | 939.996 |
| ENSGALT0000 protein inhibitor of activated STAT,  | PIAS4    | 0.93879  | 646     |
| ENSGALT0000 progesterone immunomodulatory b       | PIBF1    | 0.974691 | 221     |
| ENSGALT0000 phosphatidylinositol binding clathrir | PICALM   | 0.953577 | 951     |
| ENSGALT0000 protein interacting with PRKCA 1      | PICK1    | 0.995943 | 1621.5  |
| ENSGALT0000 phosphotyrosine interaction domair    | PID1     | 0.999082 | 199.5   |
| ENSGALT0000 p53-induced death domain protein      | PIDD     | 0.997433 | 227     |

|             |                                              |         |          |         |
|-------------|----------------------------------------------|---------|----------|---------|
| ENSGALT0000 | piezo-type mechanosensitive ion channel      | PIEZO2  | 0.802006 | 5804.5  |
| ENSGALT0000 | PIF1 5'-to-3' DNA helicase homolog           | PIF1    | 0.891769 | 319.5   |
| ENSGALT0000 | phosphatidylinositol glycan anchor           | PIGA    | 0.998523 | 772     |
| ENSGALT0000 | phosphatidylinositol glycan anchor           | PIGB    | 0.980326 | 535.846 |
| ENSGALT0000 | phosphatidylinositol glycan anchor           | PIGF    | 0.987066 | 515.5   |
| ENSGALT0000 | phosphatidylinositol glycan anchor           | PIGG    | 0.909472 | 1471    |
| ENSGALT0000 | phosphatidylinositol glycan anchor           | PIGH    | 0.861907 | 307.5   |
| ENSGALT0000 | phosphatidylinositol glycan anchor           | PIGK    | 0.99548  | 1973.5  |
| ENSGALT0000 | phosphatidylinositol glycan anchor           | PIGL    | 0.941696 | 110.5   |
| ENSGALT0000 | phosphatidylinositol glycan anchor           | PIGM    | 0.783717 | 298.5   |
| ENSGALT0000 | phosphatidylinositol glycan anchor           | PIGN    | 0.991952 | 311.999 |
| ENSGALT0000 | phosphatidylinositol glycan anchor           | PIGO    | 0.998431 | 916     |
| ENSGALT0000 | phosphatidylinositol glycan anchor           | PIGP    | 0.971177 | 124.5   |
| ENSGALT0000 | phosphatidylinositol glycan anchor           | PIGQ    | 0.962394 | 448.5   |
| ENSGALT0000 | polymeric immunoglobulin receptor            | PIGR    | 0.631223 | 0       |
| ENSGALT0000 | phosphatidylinositol glycan anchor           | PIGS    | 0.919698 | 2431    |
| ENSGALT0000 | phosphatidylinositol glycan anchor           | PIGT    | 0.935192 | 2293.5  |
| ENSGALT0000 | phosphatidylinositol glycan anchor           | PIGU    | 0.957775 | 553.5   |
| ENSGALT0000 | phosphatidylinositol glycan anchor           | PIGV    | 0.972705 | 267.5   |
| ENSGALT0000 | phosphatidylinositol glycan anchor           | PIGW    | 0.924278 | 311.5   |
| ENSGALT0000 | phosphatidylinositol glycan anchor           | PIGX    | 0.573452 | 1058.5  |
| ENSGALT0000 | phosphatidylinositol glycan anchor           | PIGY    | 0.67791  | 380.5   |
| ENSGALT0000 | PIH1 domain containing 2                     | PIH1D2  | 0.912081 | 413     |
| ENSGALT0000 | phosphoinositide-3-kinase adaptor            | PIK3AP1 | 0.950769 | 341.999 |
| ENSGALT0000 | phosphoinositide-3-kinase, class 2           | PIK3C2A | 0.983116 | 2522    |
| ENSGALT0000 | phosphoinositide-3-kinase, class 2           | PIK3C2B | 0.88091  | 3809.5  |
| ENSGALT0000 | phosphoinositide-3-kinase, class 2           | PIK3C2G | 0.876982 | 42.5    |
| ENSGALT0000 | phosphoinositide-3-kinase, class 3           | PIK3C3  | 0.948512 | 709.501 |
| ENSGALT0000 | phosphoinositide-3-kinase, catalytic         | PIK3CA  | 0.963488 | 822.507 |
| ENSGALT0000 | phosphoinositide-3-kinase, catalytic         | PIK3CB  | 0.947703 | 380     |
| ENSGALT0000 | phosphoinositide-3-kinase, catalytic         | PIK3CD  | 0.988759 | 508.5   |
| ENSGALT0000 | phosphoinositide-3-kinase, catalytic         | PIK3CG  | 0.985999 | 384.5   |
| ENSGALT0000 | phosphoinositide-3-kinase interacting        | PIK3IP1 | 0.827342 | 1738    |
| ENSGALT0000 | phosphoinositide-3-kinase, regulator         | PIK3R1  | 0.823533 | 175     |
| ENSGALT0000 | phosphoinositide-3-kinase, regulator         | PIK3R2  | 0.954678 | 6162.5  |
| ENSGALT0000 | phosphoinositide-3-kinase, regulator         | PIK3R3  | 0.90663  | 640.999 |
| ENSGALT0000 | phosphoinositide-3-kinase, regulator         | PIK3R4  | 0.993999 | 2325.53 |
| ENSGALT0000 | phosphoinositide-3-kinase regulator          | PIK3R5  | 0.984121 | 106.5   |
| ENSGALT0000 | phosphoinositide-3-kinase, regulator         | PIK3R6  | 0.870681 | 33.5    |
| ENSGALT0000 | phosphoinositide kinase, FYVE family         | PIKFYVE | 0.954178 | 1155.5  |
| ENSGALT0000 | pim-1 oncogene                               | PIM1    | 0.987315 | 424     |
| ENSGALT0000 | protein (peptidylprolyl cis/trans isomerase) | PIN4    | 0.131333 | 1722    |
| ENSGALT0000 | PTEN induced putative kinase 1               | PINK1   | 0.951148 | 2038.5  |
| ENSGALT0000 | PIN2/TERF1 interacting, telomerase           | PINX1   | 0.944535 | 300.5   |
| ENSGALT0000 | pigeon homolog (Drosophila)                  | PION    | 0.959494 | 416     |
| ENSGALT0000 | phosphatidylinositol-5-phosphate 4           | PIP4K2A | 0.898001 | 1490    |
| ENSGALT0000 | phosphatidylinositol-5-phosphate 4           | PIP4K2B | 0.880348 | 1375    |
| ENSGALT0000 | phosphatidylinositol-4-phosphate 5           | PIP5K1A | 0.63604  | 5280.99 |
| ENSGALT0000 | phosphatidylinositol-4-phosphate 5           | PIP5K1B | 0.992386 | 406.999 |
| ENSGALT0000 | phosphatidylinositol-4-phosphate 5           | PIP5K1C | 0.970491 | 2111    |
| ENSGALT0000 | phosphoinositide-interacting regulator       | PIRT    | 0.494778 | 15.5    |
| ENSGALT0000 | phosphatidylserine decarboxylase             | PSD     | 0.952642 | 435     |
| ENSGALT0000 | PITH (C-terminal proteasome-interacting)     | PITHD1  | 0.575799 | 1024.5  |
| ENSGALT0000 | phosphatidylinositol transfer protein        | PITPNA  | 0.915003 | 1007    |
| ENSGALT0000 | phosphatidylinositol transfer protein        | PITPNB  | 0.884263 | 2156.97 |
| ENSGALT0000 | phosphatidylinositol transfer protein        | PITPNC1 | 0.772483 | 296     |

|             |                                        |          |            |         |
|-------------|----------------------------------------|----------|------------|---------|
| ENSGALT0000 | phosphatidylinositol transfer proteir  | PITPNM1  | 0.961088   | 2548.39 |
| ENSGALT0000 | phosphatidylinositol transfer proteir  | PITPNM2  | 0.906765   | 1026.5  |
| ENSGALT0000 | PITPNM family member 3                 | PITPNM3  | 0.994104   | 512.5   |
| ENSGALT0000 | pitrilysin metallopeptidase 1          | PITRM1   | 0.977108   | 1203.98 |
| ENSGALT0000 | paired-like homeodomain 1              | PITX1    | 0.725097   | 2       |
| ENSGALT0000 | paired-like homeodomain 3              | PITX3    | 0.574317   | 2.5     |
| ENSGALT0000 | piwi-like 1 (Drosophila)               | PIWIL1   | 0.711193   | 243     |
| ENSGALT0000 | praja ring finger 2, E3 ubiquitin prot | PJA2     | 0.999755   | 455     |
| ENSGALT0000 | polycystic kidney disease 1 (autosc    | PKD1     | 0.993226   | 1258.5  |
| ENSGALT0000 | polycystic kidney disease 2 (autosc    | PKD2     | 0.972775   | 1959.5  |
| ENSGALT0000 | polycystic kidney disease 2-like 1     | PKD2L1   | 0.575173   | 6       |
| ENSGALT0000 | polycystic kidney disease 2-like 2     | PKD2L2   | 0.99406    | 87.5    |
| ENSGALT0000 | protein kinase domain containing, c    | PKDCC    | 0.942069   | 2075.5  |
| ENSGALT0000 | polycystic kidney disease (polycyst    | PKDREJ   | 0.987002   | 70.5    |
| ENSGALT0000 | polycystic kidney and hepatic disea    | PKHD1    | 0.995913   | 135     |
| ENSGALT0000 | cAMP-dependent protein kinase inl      | PKIA     | 0.770016   | 598     |
| ENSGALT0000 | protein kinase (cAMP-dependent, c      | PKIB     | 0.58528    | 83      |
| ENSGALT0000 | protein kinase (cAMP-dependent, c      | PKIG     | 0.00931889 | 181     |
| ENSGALT0000 | pyruvate kinase, muscle                | PKM2     | 0.916335   | 50419.2 |
| ENSGALT0000 | protein kinase N3                      | PKN3     | 0.993497   | 452.5   |
| ENSGALT0000 | PBX/knotted 1 homeobox 1               | PKNOX1   | 0.968448   | 334.5   |
| ENSGALT0000 | PBX/knotted 1 homeobox 2               | PKNOX2   | 0.9943     | 1239.51 |
| ENSGALT0000 | plakophilin 1 (ectodermal dysplasia    | PKP1     | 0.824645   | 5       |
| ENSGALT0000 | plakophilin 2                          | PKP2     | 0.682691   | 1912.51 |
| ENSGALT0000 | plakophilin 3                          | PKP3     | 0.951034   | 808.5   |
| ENSGALT0000 | plakophilin 4                          | PKP4     | 0.996109   | 2624.08 |
| ENSGALT0000 | phospholipase A1 member A              | PLA1A    | 0.933864   | 16      |
| ENSGALT0000 | phospholipase A2, group X1IA           | PLA2G12A | 0.965359   | 751     |
| ENSGALT0000 | phospholipase A2, group X1IB           | PLA2G12B | 0.631223   | 1.5     |
| ENSGALT0000 | phospholipase A2, group XV             | PLA2G15  | 0.962458   | 439.5   |
| ENSGALT0000 | phospholipase A2, group IB (pancr      | PLA2G1B  | 0.649519   | 2       |
| ENSGALT0000 | phospholipase A2, group IIA (platel    | PLA2G2A  | 0.649045   | 4.5     |
| ENSGALT0000 | phospholipase A2, group IIE            | PLA2G2E  | 0.7378     | 50      |
| ENSGALT0000 | phospholipase A2, group IVA (cytos     | PLA2G4A  | 0.934385   | 176     |
| ENSGALT0000 | phospholipase A2, group IVE            | PLA2G4E  | 0.560649   | 2.5     |
| ENSGALT0000 | phospholipase A2, group IVF            | PLA2G4F  | 0.941817   | 27      |
| ENSGALT0000 | phospholipase A2, group VI (cytos      | PLA2G6   | 0.947926   | 931.5   |
| ENSGALT0000 | phospholipase A2, group VII (platel    | PLA2G7   | 0.944446   | 745.498 |
| ENSGALT0000 | phospholipase A2 receptor 1, 180k      | PLA2R1   | 0.991518   | 1599.48 |
| ENSGALT0000 | phospholipase A2-activating proteir    | PLAA     | 0.908982   | 1306    |
| ENSGALT0000 | placenta-specific 8                    | PLAC8    | 0.392103   | 0.5     |
| ENSGALT0000 | Zinc finger protein PLAG1              | PLAG1    | 0.992993   | 288.115 |
| ENSGALT0000 | pleiomorphic adenoma gene-like 1       | PLAGL1   | 0.979526   | 1473    |
| ENSGALT0000 | pleiomorphic adenoma gene-like 2       | PLAGL2   | 0.983459   | 565     |
| ENSGALT0000 | plasminogen activator, tissue          | PLAT     | 0.897145   | 215     |
| ENSGALT0000 | plasminogen activator, urokinase       | PLAU     | 0.826357   | 154.5   |
| ENSGALT0000 | phospholipase B1                       | PLB1     | 0.68037    | 7       |
| ENSGALT0000 | phospholipase B domain containin       | PLBD1    | 0.946463   | 1036.5  |
| ENSGALT0000 | phospholipase C, beta 1 (phosphoi      | PLCB1    | 0.985587   | 264.5   |
| ENSGALT0000 | phospholipase C, beta 2                | PLCB2    | 0.977291   | 89      |
| ENSGALT0000 | phospholipase C, beta 4                | PLCB4    | 0.981312   | 319     |
| ENSGALT0000 | phospholipase C, delta 1               | PLCD1    | 0.737653   | 554.001 |
| ENSGALT0000 | phospholipase C, delta 4               | PLCD4    | 0.91139    | 483.5   |
| ENSGALT0000 | phospholipase C, epsilon 1             | PLCE1    | 0.980537   | 832     |
| ENSGALT0000 | phospholipase C, gamma 1               | PLCG1    | 0.871039   | 7398.33 |
| ENSGALT0000 | phospholipase C, gamma 2 (phosp        | PLCG2    | 0.872778   | 338.5   |

|             |                                                                         |         |          |         |
|-------------|-------------------------------------------------------------------------|---------|----------|---------|
| ENSGALT0000 | phospholipase C, eta 1                                                  | PLCH1   | 0.924076 | 1813.02 |
| ENSGALT0000 | phospholipase C, eta 2                                                  | PLCH2   | 0.983171 | 699     |
| ENSGALT0000 | phospholipase C-like 1                                                  | PLCL1   | 0.819536 | 85      |
| ENSGALT0000 | phospholipase C-like 2                                                  | PLCL2   | 0.99345  | 219.5   |
| ENSGALT0000 | phosphatidylinositol-specific phospholipase C                           | PLCXD1  | 0.997657 | 8       |
| ENSGALT0000 | phosphatidylinositol-specific phospholipase C                           | PLCXD2  | 0.954444 | 24      |
| ENSGALT0000 | phosphatidylinositol-specific phospholipase C                           | PLCXD3  | 0.884725 | 42.5    |
| ENSGALT0000 | phospholipase C, zeta 1                                                 | PLCZ1   | 0.464758 | 0.5     |
| ENSGALT0000 | phospholipase D1, phosphatidylcholine phospholipase                     | PLD1    | 0.987167 | 745     |
| ENSGALT0000 | phospholipase D family, member 4                                        | PLD4    | 0.649519 | 0.5     |
| ENSGALT0000 | phospholipase D family, member 5                                        | PLD5    | 0.980127 | 99      |
| ENSGALT0000 | pallidin homolog (mouse)                                                | PLDN    | 0.796798 | 291.5   |
| ENSGALT0000 | pleckstrin                                                              | PLEK    | 0.993304 | 93      |
| ENSGALT0000 | pleckstrin 2                                                            | PLEK2   | 0.888684 | 183     |
| ENSGALT0000 | pleckstrin homology domain containing                                   | PLEKHA1 | 0.980928 | 567.504 |
| ENSGALT0000 | pleckstrin homology domain containing                                   | PLEKHA2 | 0.80296  | 78      |
| ENSGALT0000 | pleckstrin homology domain containing                                   | PLEKHA3 | 0.98776  | 379.5   |
| ENSGALT0000 | pleckstrin homology domain containing                                   | PLEKHA5 | 0.991137 | 1467    |
| ENSGALT0000 | pleckstrin homology domain containing                                   | PLEKHA6 | 0.911699 | 628.5   |
| ENSGALT0000 | pleckstrin homology domain containing                                   | PLEKHA7 | 0.995468 | 1050    |
| ENSGALT0000 | pleckstrin homology domain containing                                   | PLEKHA8 | 0.888746 | 232     |
| ENSGALT0000 | pleckstrin homology domain containing                                   | PLEKHB1 | 0.939224 | 884.554 |
| ENSGALT0000 | pleckstrin homology domain containing                                   | PLEKHB2 | 0.957058 | 2554.42 |
| ENSGALT0000 | pleckstrin homology domain containing                                   | PLEKHC1 | 0.903205 | 3313    |
| ENSGALT0000 | pleckstrin homology domain containing                                   | PLEKHD1 | 0.872883 | 153     |
| ENSGALT0000 | pleckstrin homology domain containing                                   | PLEKHF1 | 0.86912  | 94.5    |
| ENSGALT0000 | pleckstrin homology domain containing                                   | PLEKHF2 | 0.966289 | 593     |
| ENSGALT0000 | pleckstrin homology domain containing                                   | PLEKHG1 | 0.992284 | 1739.99 |
| ENSGALT0000 | pleckstrin homology domain containing                                   | PLEKHG4 | 0.913484 | 516     |
| ENSGALT0000 | pleckstrin homology domain containing                                   | PLEKHG7 | 0.363607 | 0       |
| ENSGALT0000 | pleckstrin homology domain containing                                   | PLEKHH1 | 0.981582 | 751.5   |
| ENSGALT0000 | pleckstrin homology domain containing                                   | PLEKHH2 | 0.960124 | 442.5   |
| ENSGALT0000 | pleckstrin homology domain containing                                   | PLEKHJ1 | 0.926393 | 2655.73 |
| ENSGALT0000 | pleckstrin homology domain containing                                   | PLEKHM1 | 0.946371 | 953.488 |
| ENSGALT0000 | pleckstrin homology domain containing                                   | PLEKHM2 | 0.906022 | 2440.5  |
| ENSGALT0000 | pleckstrin homology domain containing                                   | PLEKHM3 | 0.892207 | 270.5   |
| ENSGALT0000 | pleckstrin homology domain containing                                   | PLEKHN1 | 0.581745 | 16.5    |
| ENSGALT0000 | pleckstrin homology domain containing                                   | PLEKHO1 | 0.66541  | 852.5   |
| ENSGALT0000 | plasminogen                                                             | PLG     | ?        | 0       |
| ENSGALT0000 | perilipin 1                                                             | PLIN1   | 0.937267 | 16.5    |
| ENSGALT0000 | perilipin 2                                                             | PLIN2   | 0.89928  | 1406    |
| ENSGALT0000 | perilipin 3                                                             | PLIN3   | 0.419336 | 3       |
| ENSGALT0000 | perilipin 5                                                             | PLIN5   | 0.6463   | 1298.5  |
| ENSGALT0000 | polo-like kinase 1                                                      | PLK1    | 0.778551 | 3541.5  |
| ENSGALT0000 | polo-like kinase 1 substrate 1                                          | PLK1S1  | 0.927864 | 1877.51 |
| ENSGALT0000 | polo-like kinase 2                                                      | PLK2    | 0.883763 | 966     |
| ENSGALT0000 | polo-like kinase 3                                                      | PLK3    | 0.830433 | 459.5   |
| ENSGALT0000 | polo-like kinase 4                                                      | PLK4    | 0.946905 | 818     |
| ENSGALT0000 | plasmolipin                                                             | PLLIP   | 0.780106 | 35.5    |
| ENSGALT0000 | phospholamban                                                           | PLN     | 0.773583 | 1.5     |
| ENSGALT0000 | procollagen-lysine, 2-oxoglutarate dependent lysyl prolyl 4-hydroxylase | PLOD1   | 0.96502  | 3555.5  |
| ENSGALT0000 | procollagen-lysine, 2-oxoglutarate dependent lysyl prolyl 4-hydroxylase | PLOD2   | 0.974221 | 3474.5  |
| ENSGALT0000 | proteolipid protein 1                                                   | PLP1    | 0.524813 | 42      |
| ENSGALT0000 | pleiotropic regulator 1                                                 | PLRG1   | 0.913083 | 1762.5  |
| ENSGALT0000 | plastin 1                                                               | PLS1    | 0.809352 | 211     |
| ENSGALT0000 | plastin 3                                                               | PLS3    | 0.986308 | 5979.5  |

|             |                                                |         |           |         |
|-------------|------------------------------------------------|---------|-----------|---------|
| ENSGALT0000 | phospholipid scramblase 1                      | PLSCR1  | 0.781179  | 470     |
| ENSGALT0000 | phospholipid scramblase family, member 5       | PLSCR5  | 0.778956  | 92.5    |
| ENSGALT0000 | phospholipid transfer protein                  | PLTP    | 0.910962  | 391.5   |
| ENSGALT0000 | plexin domain containing 1                     | PLXDC1  | 0.944155  | 113.5   |
| ENSGALT0000 | plexin domain containing 2                     | PLXDC2  | 0.985542  | 434     |
| ENSGALT0000 | plexin A1                                      | PLXNA1  | 0.960516  | 7727.19 |
| ENSGALT0000 | plexin A2                                      | PLXNA2  | 0.801757  | 620.289 |
| ENSGALT0000 | plexin A4, B                                   | PLXNA4B | 0.960164  | 785.486 |
| ENSGALT0000 | plexin B1                                      | PLXNB1  | 0.984377  | 1331    |
| ENSGALT0000 | plexin B2                                      | PLXNB2  | 0.926177  | 3239.19 |
| ENSGALT0000 | plexin C1                                      | PLXNC1  | 0.968537  | 956     |
| ENSGALT0000 | plexin D1                                      | PLXND1  | 0.847109  | 1431    |
| ENSGALT0000 | peptidase M20 domain containing 1              | PM20D1  | 0.935108  | 1023.5  |
| ENSGALT0000 | peptidase M20 domain containing 2              | PM20D2  | 0.939651  | 219.5   |
| ENSGALT0000 | pM5 protein                                    | PM5     | 0.970707  | 4433    |
| ENSGALT0000 | MMP115 protein                                 | PMEL    | 0.824565  | 95      |
| ENSGALT0000 | prostate transmembrane protein, alpha          | PMEPA1  | 0.916531  | 267.501 |
| ENSGALT0000 | polyamine modulated factor 1 binding protein   | PMFBP1  | 0.950517  | 9.5     |
| ENSGALT0000 | phosphomannomutase 1                           | PMM1    | 0.937026  | 147     |
| ENSGALT0000 | phosphomannomutase 2                           | PMM2    | 0.924354  | 558.001 |
| ENSGALT0000 | peripheral myelin protein 2                    | PMP2    | 0.309576  | 1.5     |
| ENSGALT0000 | peripheral myelin protein 22                   | PMP22   | 0.959885  | 637.5   |
| ENSGALT0000 | peptidase (mitochondrial processing)           | PMPCA   | 0.908736  | 2458    |
| ENSGALT0000 | peptidase (mitochondrial processing)           | PMPCB   | 0.860261  | 1246.5  |
| ENSGALT0000 | PMS1 postmeiotic segregation increase          | PMS1    | 0.968962  | 612     |
| ENSGALT0000 | PMS2 postmeiotic segregation increase          | PMS2    | 0.954352  | 803.495 |
| ENSGALT0000 | N-acetyltransferase, pineal gland isoform      | PNAT10  | 0.787709  | 81      |
| ENSGALT0000 | Arylamine N-acetyltransferase, pineal gland    | PNAT3   | 0.638744  | 106.109 |
| ENSGALT0000 | PNN-interacting serine/arginine-rich protein   | PNISR   | 0.996126  | 3450.85 |
| ENSGALT0000 | paroxysmal nonkinesigenic dyskinesia           | PNKD    | 0.841029  | 349.5   |
| ENSGALT0000 | poly(A)-specific ribonuclease (PAR1)           | PNLDC1  | 0.826302  | 18      |
| ENSGALT0000 | pancreatic lipase                              | PNLIP   | 0.164317  | 0.5     |
| ENSGALT0000 | pinin, desmosome associated protein            | PNN     | 0.954233  | 2385    |
| ENSGALT0000 | partner of NOB1 homolog (S. cerevisiae)        | PNO1    | 0.880413  | 807.997 |
| ENSGALT0000 | prepronociceptin                               | PNOC    | 0.832462  | 12      |
| ENSGALT0000 | purine nucleoside phosphorylase                | PNP     | 0.0533012 | 0.5     |
| ENSGALT0000 | patatin-like phospholipase domain containing 1 | PNPLA1  | 0.539038  | 1.5     |
| ENSGALT0000 | patatin-like phospholipase domain containing 2 | PNPLA2  | 0.981379  | 234.5   |
| ENSGALT0000 | patatin-like phospholipase domain containing 3 | PNPLA3  | 0.939067  | 809.5   |
| ENSGALT0000 | patatin-like phospholipase domain containing 4 | PNPLA4  | 0.974223  | 43.5    |
| ENSGALT0000 | patatin-like phospholipase domain containing 6 | PNPLA6  | 0.884851  | 1138.51 |
| ENSGALT0000 | patatin-like phospholipase domain containing 7 | PNPLA7  | 0.982348  | 2690.55 |
| ENSGALT0000 | patatin-like phospholipase domain containing 8 | PNPLA8  | 0.99024   | 802.5   |
| ENSGALT0000 | polyribonucleotide nucleotidyltransferase 1    | PNPT1   | 0.945257  | 444.5   |
| ENSGALT0000 | proline-rich nuclear receptor coactivator 1    | PNRC1   | 0.997546  | 3834.58 |
| ENSGALT0000 | proline-rich nuclear receptor coactivator 2    | PNRC2   | 0.966527  | 2997.5  |
| ENSGALT0000 | POC1 centriolar protein homolog A              | POC1A   | 0.987848  | 486.865 |
| ENSGALT0000 | POC5 centriolar protein homolog (C)            | POC5    | 0.938847  | 265     |
| ENSGALT0000 | podocan                                        | PODN    | 0.955074  | 37.5    |
| ENSGALT0000 | podocalyxin-like                               | PODXL   | 0.814759  | 269.5   |
| ENSGALT0000 | podocalyxin-like 2                             | PODXL2  | 0.733463  | 983.845 |
| ENSGALT0000 | premature ovarian failure, 1B                  | POF1B   | 0.915828  | 584.5   |
| ENSGALT0000 | protein O-fucosyltransferase 1                 | POFUT1  | 0.975694  | 3708.58 |
| ENSGALT0000 | protein O-fucosyltransferase 2                 | POFUT2  | 0.952886  | 1779.47 |
| ENSGALT0000 | protein O-glucosyltransferase 1                | POGLUT1 | 0.990776  | 1897    |
| ENSGALT0000 | pogo transposable element with zinc finger     | POGZ    | 0.980902  | 1058    |

|             |                                       |         |          |         |
|-------------|---------------------------------------|---------|----------|---------|
| ENSGALT0000 | polymerase (DNA directed), alpha      | POLA1   | 0.963446 | 1831    |
| ENSGALT0000 | polymerase (DNA directed), beta       | POLB    | 0.893797 | 1018.5  |
| ENSGALT0000 | polymerase (DNA-directed), delta 3    | POLD3   | 0.984546 | 2130    |
| ENSGALT0000 | polymerase (DNA-directed), delta ii   | POLDIP3 | 0.965274 | 3008.5  |
| ENSGALT0000 | polymerase (DNA directed), epsilon    | POLE    | 0.930961 | 2050.48 |
| ENSGALT0000 | polymerase (DNA directed), epsilon    | POLE2   | 0.946691 | 1385.51 |
| ENSGALT0000 | polymerase (DNA directed), epsilon    | POLE3   | 0.782125 | 2475.5  |
| ENSGALT0000 | polymerase (DNA directed), gamma      | POLG2   | 0.990348 | 1099.5  |
| ENSGALT0000 | polymerase (DNA directed), eta        | POLH    | 0.90465  | 1093.5  |
| ENSGALT0000 | polymerase (DNA directed) kappa       | POLK    | 0.997575 | 204     |
| ENSGALT0000 | polymerase (DNA directed), lambda     | POLL    | 0.955225 | 758.505 |
| ENSGALT0000 | polymerase (DNA directed) nu          | POLN    | 0.499681 | 10.5    |
| ENSGALT0000 | polymerase (DNA directed), theta      | POLQ    | 0.954123 | 88      |
| ENSGALT0000 | polymerase (RNA) I polypeptide B,     | POLR1B  | 0.92673  | 1914.51 |
| ENSGALT0000 | polymerase (RNA) I polypeptide C,     | POLR1C  | 0.76975  | 1177    |
| ENSGALT0000 | polymerase (RNA) I polypeptide D,     | POLR1D  | 0.542974 | 365     |
| ENSGALT0000 | polymerase (RNA) I polypeptide E,     | POLR1E  | 0.914148 | 839     |
| ENSGALT0000 | polymerase (RNA) II (DNA directed     | POLR2B  | 0.945721 | 3314.14 |
| ENSGALT0000 | polymerase (RNA) II (DNA directed     | POLR2C  | 0.83525  | 3445    |
| ENSGALT0000 | polymerase (RNA) II (DNA directed     | POLR2D  | 0.847257 | 932     |
| ENSGALT0000 | polymerase (RNA) II (DNA directed     | POLR2E  | 0.392058 | 2649    |
| ENSGALT0000 | polymerase (RNA) II (DNA directed     | POLR2F  | 0.334358 | 2856.5  |
| ENSGALT0000 | polymerase (RNA) II (DNA directed     | POLR2H  | 0.579182 | 1983.5  |
| ENSGALT0000 | polymerase (RNA) II (DNA directed     | POLR2I  | 0.357993 | 1512.5  |
| ENSGALT0000 | polymerase (RNA) II (DNA directed     | POLR2J2 | 0.912953 | 867.744 |
| ENSGALT0000 | polymerase (RNA) II (DNA directed     | POLR2K  | 0.226319 | 147.142 |
| ENSGALT0000 | polymerase (RNA) II (DNA directed     | POLR2L  | 0.408501 | 983     |
| ENSGALT0000 | polymerase (RNA) III (DNA directe     | POLR3A  | 0.964522 | 770     |
| ENSGALT0000 | polymerase (RNA) III (DNA directe     | POLR3B  | 0.915595 | 1383.5  |
| ENSGALT0000 | polymerase (RNA) III (DNA directe     | POLR3C  | 0.856735 | 242.5   |
| ENSGALT0000 | polymerase (RNA) III (DNA directe     | POLR3E  | 0.937629 | 851     |
| ENSGALT0000 | polymerase (RNA) III (DNA directe     | POLR3F  | 0.755677 | 893.5   |
| ENSGALT0000 | polymerase (RNA) III (DNA directe     | POLR3G  | 0.909496 | 5.5     |
| ENSGALT0000 | polymerase (RNA) III (DNA directe     | POLR3H  | 0.878043 | 436.5   |
| ENSGALT0000 | polymerase (RNA) mitochondrial (L     | POLRMT  | 0.94623  | 1322.71 |
| ENSGALT0000 | proopiomelanocortin                   | POMC    | 0.508319 | 3.5     |
| ENSGALT0000 | protein O-linked mannose beta1,2-     | POMGNT1 | 0.966069 | 1233.5  |
| ENSGALT0000 | proteasome maturation protein         | POMP    | 0.954635 | 1332.5  |
| ENSGALT0000 | protein-O-mannosyltransferase 1       | POMT1   | 0.987256 | 1937.97 |
| ENSGALT0000 | protein-O-mannosyltransferase 2       | POMT2   | 0.96344  | 886.5   |
| ENSGALT0000 | paraoxonase 2                         | PON2    | 0.937033 | 199     |
| ENSGALT0000 | processing of precursor 1, ribonucl   | POP1    | 0.955236 | 240     |
| ENSGALT0000 | processing of precursor 4, ribonucl   | POP4    | 0.972198 | 443.5   |
| ENSGALT0000 | processing of precursor 5, ribonucl   | POP5    | 0.19828  | 1206.5  |
| ENSGALT0000 | popeye domain containing 2            | POPDC2  | 0.896625 | 161     |
| ENSGALT0000 | popeye domain containing 3            | POPDC3  | 0.670227 | 138     |
| ENSGALT0000 | P450 (cytochrome) oxidoreductase      | POR     | 0.942559 | 3034    |
| ENSGALT0000 | periostin, osteoblast specific factor | POSTN   | 0.705399 | 712     |
| ENSGALT0000 | protection of telomeres 1 homolog     | POT1    | 0.977933 | 420.5   |
| ENSGALT0000 | POTE ankyrin domain family, mem       | POTEJ   | 0.660309 | 47708.1 |
| ENSGALT0000 | POU class 1 homeobox 1                | POU1F1  | 0.94939  | 5       |
| ENSGALT0000 | POU class 2 associating factor 1      | POU2AF1 | 0.819665 | 8       |
| ENSGALT0000 | POU class 2 homeobox 1                | POU2F1  | 0.968874 | 738.49  |
| ENSGALT0000 | POU class 2 homeobox 3                | POU2F3  | 0.671958 | 1.5     |
| ENSGALT0000 | Brain-specific homeobox/POU dom       | POU4F3  | 0.489828 | 380     |
| ENSGALT0000 | POU class 6 homeobox 2                | POU6F2  | 0.77305  | 35.5    |



|             |                                                                          |          |         |
|-------------|--------------------------------------------------------------------------|----------|---------|
| ENSGALT0000 | protein phosphatase 2C-like domain PP2D1                                 | 0.373883 | 2       |
| ENSGALT0000 | pyrophosphatase (inorganic) 1 PPA1                                       | 0.577361 | 3054.5  |
| ENSGALT0000 | pyrophosphatase (inorganic) 2 PPA2                                       | 0.832583 | 827     |
| ENSGALT0000 | phosphatidic acid phosphatase type PPAP2A                                | 0.895512 | 306.508 |
| ENSGALT0000 | phosphatidic acid phosphatase type PPAP2B                                | 0.958274 | 1548.5  |
| ENSGALT0000 | phosphatidic acid phosphatase type PPAPDC1A                              | 0.72935  | 358.5   |
| ENSGALT0000 | phosphatidic acid phosphatase type PPAPDC1B                              | 0.767156 | 1082    |
| ENSGALT0000 | phosphatidic acid phosphatase type PPAPDC2                               | 0.860556 | 639     |
| ENSGALT0000 | phosphatidic acid phosphatase type PPAPDC3                               | 0.370459 | 15      |
| ENSGALT0000 | peroxisome proliferator-activated receptor PPARA                         | 0.935995 | 136.852 |
| ENSGALT0000 | peroxisome proliferator-activated receptor PPARD                         | 0.976709 | 1037.5  |
| ENSGALT0000 | peroxisome proliferator-activated receptor PPARG                         | 0.826277 | 14      |
| ENSGALT0000 | peroxisome proliferator-activated receptor PPARGC1A                      | 0.940899 | 69.5    |
| ENSGALT0000 | peroxisome proliferator-activated receptor PPARGC1B                      | 0.89478  | 342     |
| ENSGALT0000 | phosphoribosyl pyrophosphate aminidase PPAT                              | 0.930538 | 454     |
| ENSGALT0000 | phosphopantothienoylcysteine decarboxylase PPCDC                         | 0.888232 | 369     |
| ENSGALT0000 | phosphopantothienoylcysteine synthetase PPCS                             | 0.452163 | 521.5   |
| ENSGALT0000 | pancreatic progenitor cell differentiation factor PPDPF                  | 0.847139 | 283     |
| ENSGALT0000 | protein phosphatase, EF-hand calcium-binding PPEF2                       | 0.973889 | 55      |
| ENSGALT0000 | protein tyrosine phosphatase, receptor type PPFIA1                       | 0.983409 | 1921.57 |
| ENSGALT0000 | protein tyrosine phosphatase, receptor type PPFIA2                       | 0.831781 | 2673    |
| ENSGALT0000 | protein tyrosine phosphatase, receptor type PPFIA4                       | 0.799589 | 219     |
| ENSGALT0000 | PTPRF interacting protein, binding partner PPFIBP1                       | 0.986118 | 3358    |
| ENSGALT0000 | PTPRF interacting protein, binding partner PPFIBP2                       | 0.951489 | 303.745 |
| ENSGALT0000 | periphilin 1 PPHLN1                                                      | 0.891343 | 792     |
| ENSGALT0000 | peptidylprolyl isomerase B (cyclophilin) PPIB                            | 0.565269 | 21309   |
| ENSGALT0000 | peptidylprolyl isomerase C (cyclophilin) PPIC                            | 0.913984 | 757     |
| ENSGALT0000 | peptidylprolyl isomerase D PPID                                          | 0.81838  | 808.846 |
| ENSGALT0000 | peptidylprolyl isomerase E (cyclophilin) PPIE                            | 0.420942 | 1880.51 |
| ENSGALT0000 | peptidylprolyl isomerase F PPIF                                          | 0.740531 | 346.5   |
| ENSGALT0000 | peptidylprolyl isomerase G (cyclophilin) PPIG                            | 0.850983 | 1278    |
| ENSGALT0000 | peptidylprolyl isomerase H (cyclophilin) PPIH                            | 0.630571 | 1578.5  |
| ENSGALT0000 | peptidylprolyl isomerase (cyclophilin) PPIL2                             | 0.956514 | 1252    |
| ENSGALT0000 | peptidylprolyl isomerase (cyclophilin) PPIL3                             | 0.729031 | 317.5   |
| ENSGALT0000 | peptidylprolyl isomerase (cyclophilin) PPIL4                             | 0.926527 | 705.5   |
| ENSGALT0000 | peptidylprolyl isomerase (cyclophilin) PPIL6                             | 0.853815 | 1       |
| ENSGALT0000 | diphosphoinositol pentakisphosphate PPIP5K1                              | 0.945879 | 350.788 |
| ENSGALT0000 | diphosphoinositol pentakisphosphate PPIP5K2                              | 0.945317 | 764.506 |
| ENSGALT0000 | periplakin PPL                                                           | 0.994754 | 2386    |
| ENSGALT0000 | protein phosphatase, Mg <sup>2+</sup> /Mn <sup>2+</sup> -dependent PPM1A | 0.950804 | 1507.5  |
| ENSGALT0000 | protein phosphatase 1B PPM1B                                             | 0.971107 | 972.5   |
| ENSGALT0000 | protein phosphatase, Mg <sup>2+</sup> /Mn <sup>2+</sup> -dependent PPM1D | 0.961796 | 1112    |
| ENSGALT0000 | protein phosphatase, Mg <sup>2+</sup> /Mn <sup>2+</sup> -dependent PPM1E | 0.907742 | 718.999 |
| ENSGALT0000 | protein phosphatase, Mg <sup>2+</sup> /Mn <sup>2+</sup> -dependent PPM1F | 0.888084 | 228.5   |
| ENSGALT0000 | protein phosphatase, Mg <sup>2+</sup> /Mn <sup>2+</sup> -dependent PPM1H | 0.961563 | 743.5   |
| ENSGALT0000 | protein phosphatase, Mg <sup>2+</sup> /Mn <sup>2+</sup> -dependent PPM1J | 0.989415 | 185.5   |
| ENSGALT0000 | protein phosphatase, Mg <sup>2+</sup> /Mn <sup>2+</sup> -dependent PPM1K | 0.977527 | 741.999 |
| ENSGALT0000 | protein phosphatase, Mg <sup>2+</sup> /Mn <sup>2+</sup> -dependent PPM1L | 0.958215 | 599.5   |
| ENSGALT0000 | protein phosphatase, Mg <sup>2+</sup> /Mn <sup>2+</sup> -dependent PPM1M | 0.958112 | 1148.5  |
| ENSGALT0000 | protein phosphatase methyltransferase PPME1                              | 0.946616 | 4203.58 |
| ENSGALT0000 | protein phosphatase 1, catalytic subunit PPP1CB                          | 0.896483 | 3125.5  |
| ENSGALT0000 | protein phosphatase 1, catalytic subunit PPP1CC                          | 0.928375 | 5888    |
| ENSGALT0000 | protein phosphatase 1, regulatory subunit PPP1R12A                       | 0.96294  | 2261.99 |
| ENSGALT0000 | protein phosphatase 1, regulatory subunit PPP1R12B                       | 0.9895   | 2019.99 |
| ENSGALT0000 | protein phosphatase 1, regulatory subunit PPP1R13B                       | 0.999694 | 1319    |
| ENSGALT0000 | protein phosphatase 1, regulatory subunit PPP1R14C                       | 0.278148 | 195     |

|             |                                             |           |         |
|-------------|---------------------------------------------|-----------|---------|
| ENSGALT0000 | protein phosphatase 1, regulatory (PPP1R14D | 0.806794  | 17      |
| ENSGALT0000 | protein phosphatase 1, regulatory εPPP1R15B | 0.975643  | 293.5   |
| ENSGALT0000 | protein phosphatase 1, regulatory (PPP1R16B | 0.979235  | 378     |
| ENSGALT0000 | protein phosphatase 1, regulatory εPPP1R17  | 0.552669  | 290     |
| ENSGALT0000 | protein phosphatase 1, regulatory (PPP1R1C  | 0.0945523 | 657     |
| ENSGALT0000 | protein phosphatase 1, regulatory (PPP1R2   | 0.940962  | 1958.51 |
| ENSGALT0000 | protein phosphatase 1, regulatory εPPP1R21  | 0.965737  | 1036.51 |
| ENSGALT0000 | protein phosphatase 1, regulatory εPPP1R26  | 0.98071   | 389.5   |
| ENSGALT0000 | protein phosphatase 1, regulatory εPPP1R36  | 0.953519  | 5.5     |
| ENSGALT0000 | protein phosphatase 1, regulatory (PPP1R3A  | 0.464758  | 0       |
| ENSGALT0000 | protein phosphatase 1, regulatory εPPP1R3B  | 0.954072  | 68.5    |
| ENSGALT0000 | protein phosphatase 1, regulatory εPPP1R3D  | 0.992997  | 101.5   |
| ENSGALT0000 | protein phosphatase 1, regulatory εPPP1R3G  | 0.953041  | 13      |
| ENSGALT0000 | protein phosphatase 1, regulatory (PPP1R7   | 0.810325  | 2229    |
| ENSGALT0000 | protein phosphatase 1, regulatory (PPP1R8   | 0.958795  | 1600.5  |
| ENSGALT0000 | protein phosphatase 1, regulatory (PPP1R9A  | 0.976496  | 1111    |
| ENSGALT0000 | protein phosphatase 1, regulatory (PPP1R9B  | 0.989048  | 1349    |
| ENSGALT0000 | protein phosphatase 2, catalytic sul PPP2CA | 0.756764  | 4654    |
| ENSGALT0000 | protein phosphatase 2, catalytic sul PPP2CB | 0.882007  | 4145    |
| ENSGALT0000 | protein phosphatase 2, regulatory εPPP2R2A  | 0.935457  | 2156.97 |
| ENSGALT0000 | protein phosphatase 2, regulatory εPPP2R2B  | 0.714312  | 328.5   |
| ENSGALT0000 | protein phosphatase 2, regulatory εPPP2R2C  | 0.595375  | 171.5   |
| ENSGALT0000 | protein phosphatase 2, regulatory εPPP2R2D  | 0.935176  | 929.011 |
| ENSGALT0000 | protein phosphatase 2, regulatory εPPP2R3A  | 0.981066  | 1341    |
| ENSGALT0000 | protein phosphatase 2, regulatory εPPP2R3B  | 0.988053  | 527.5   |
| ENSGALT0000 | protein phosphatase 2, regulatory εPPP2R3C  | 0.803664  | 366.5   |
| ENSGALT0000 | protein phosphatase 2A activator, n PPP2R4  | 0.867983  | 4500.98 |
| ENSGALT0000 | protein phosphatase 2, regulatory εPPP2R5A  | 0.945849  | 750.5   |
| ENSGALT0000 | protein phosphatase 2, regulatory εPPP2R5C  | 0.973171  | 1590    |
| ENSGALT0000 | protein phosphatase 2, regulatory εPPP2R5D  | 0.910193  | 1030.5  |
| ENSGALT0000 | protein phosphatase 2, regulatory εPPP2R5E  | 0.963765  | 746.999 |
| ENSGALT0000 | protein phosphatase 3, catalytic sul PPP3CB | 0.943566  | 1633.03 |
| ENSGALT0000 | protein phosphatase 3, regulatory εPPP3R1   | 0.892466  | 2330.5  |
| ENSGALT0000 | protein phosphatase 4, regulatory εPPP4R1   | 0.936865  | 1790    |
| ENSGALT0000 | protein phosphatase 4, regulatory εPPP4R1L  | 0.978407  | 1175.5  |
| ENSGALT0000 | protein phosphatase 4, regulatory εPPP4R2   | 0.955935  | 2141.5  |
| ENSGALT0000 | protein phosphatase 4, regulatory εPPP4R4   | 0.947905  | 160.5   |
| ENSGALT0000 | protein phosphatase 6, catalytic sul PPP6C  | 0.82543   | 1477.99 |
| ENSGALT0000 | protein phosphatase 6, regulatory εPPP6R2   | 0.965724  | 1124    |
| ENSGALT0000 | protein phosphatase 6, regulatory εPPP6R3   | 0.952218  | 1706.51 |
| ENSGALT0000 | PPPDE peptidase domain containii PPPDE1     | 0.963975  | 1544    |
| ENSGALT0000 | PPPDE peptidase domain containii PPPDE2     | 0.838742  | 919.5   |
| ENSGALT0000 | peroxisome proliferator-activated re PPRC1  | 0.887697  | 663     |
| ENSGALT0000 | palmitoyl-protein thioesterase 1 PPT1       | 0.829184  | 1047.5  |
| ENSGALT0000 | PTC7 protein phosphatase homolo PPTC7       | 0.978051  | 901.5   |
| ENSGALT0000 | peptidylprolyl isomerase domain ar PPWD1    | 0.872586  | 912     |
| ENSGALT0000 | pancreatic polypeptide receptor 1 PPYR1     | 0.150565  | 1       |
| ENSGALT0000 | PQ loop repeat containing 1 PQLC1           | 0.937524  | 491.5   |
| ENSGALT0000 | PQ loop repeat containing 2 PQLC2           | 0.836172  | 305.582 |
| ENSGALT0000 | PQ loop repeat containing 3 PQLC3           | 0.953915  | 167.5   |
| ENSGALT0000 | protease-associated domain contai PRADC1    | 0.68017   | 883     |
| ENSGALT0000 | PML-RARA regulated adaptor mole PRAM1       | 0.380899  | 13      |
| ENSGALT0000 | protein regulator of cytokinesis 1 PRC1     | 0.886515  | 1765.93 |
| ENSGALT0000 | papillary renal cell carcinoma (trans PRCC  | 0.929649  | 2628.5  |
| ENSGALT0000 | prolylcarboxypeptidase (angiotensi PRCP     | 0.939488  | 737     |
| ENSGALT0000 | PR domain containing 10 PRDM10              | 0.962077  | 1172    |

|                                                   |          |           |         |
|---------------------------------------------------|----------|-----------|---------|
| ENSGALT0000 PR domain containing 11               | PRDM11   | 0.997566  | 809.006 |
| ENSGALT0000 PR domain containing 12               | PRDM12   | 0.0218123 | 4.5     |
| ENSGALT0000 PR domain containing 14               | PRDM14   | 0.458549  | 2.5     |
| ENSGALT0000 PR domain containing 15               | PRDM15   | 0.952888  | 828     |
| ENSGALT0000 PR domain containing 16               | PRDM16   | 0.998162  | 1995    |
| ENSGALT0000 PR domain containing 2, with ZNF      | PRDM2    | 0.970159  | 1381.5  |
| ENSGALT0000 PR domain containing 4                | PRDM4    | 0.984423  | 1235.5  |
| ENSGALT0000 PR domain containing 5                | PRDM5    | 0.943427  | 96      |
| ENSGALT0000 PR domain containing 6                | PRDM6    | 0.71619   | 6       |
| ENSGALT0000 peroxiredoxin 1                       | PRDX1    | 0.890155  | 10843   |
| ENSGALT0000 peroxiredoxin 3                       | PRDX3    | 0.771744  | 1790    |
| ENSGALT0000 peroxiredoxin 4                       | PRDX4    | 0.879535  | 4341    |
| ENSGALT0000 peroxiredoxin 6                       | PRDX6    | 0.850924  | 4965.49 |
| ENSGALT0000 PRELI domain containing 1             | PRELID1  | 0.933972  | 1958    |
| ENSGALT0000 proline/arginine-rich end leucine-ric | PRELP    | 0.977261  | 574.5   |
| ENSGALT0000 prolyl endopeptidase                  | PREP     | 0.871879  | 2841    |
| ENSGALT0000 prolyl endopeptidase-like             | PREPL    | 0.983152  | 149.5   |
| ENSGALT0000 phosphatidylinositol-3,4,5-trisphosph | PREX1    | 0.822586  | 1049    |
| ENSGALT0000 phosphatidylinositol-3,4,5-trisphosph | PREX2    | 0.707697  | 79      |
| ENSGALT0000 perforin 1 (pore forming protein)     | PRF1     | 0.649519  | 1       |
| ENSGALT0000 proteoglycan 4                        | PRG4     | 0.904524  | 74      |
| ENSGALT0000 peroxisomal proliferator-activated r  | PRIC285  | 0.996804  | 741     |
| ENSGALT0000 prickle homolog 1 (Drosophila)        | PRICKLE1 | 0.940202  | 783.5   |
| ENSGALT0000 prickle homolog 2 (Drosophila)        | PRICKLE2 | 0.86934   | 351.5   |
| ENSGALT0000 primase, DNA, polypeptide 2 (58kD     | PRIM2    | 0.948139  | 645.5   |
| ENSGALT0000 proline rich membrane anchor 1        | PRIMA1   | 0.91777   | 9       |
| ENSGALT0000 protein kinase, AMP-activated, alpr   | PRKAA1   | 0.889136  | 524     |
| ENSGALT0000 protein kinase, AMP-activated, alpr   | PRKAA2   | 0.994828  | 491.5   |
| ENSGALT0000 protein kinase, AMP-activated, beta   | PRKAB1   | 0.977578  | 1896.5  |
| ENSGALT0000 protein kinase, AMP-activated, beta   | PRKAB2   | 0.807481  | 644.5   |
| ENSGALT0000 protein kinase, cAMP-dependent, c     | PRKACB   | 0.966861  | 1323.5  |
| ENSGALT0000 protein kinase, AMP-activated, gar    | PRKAG2   | 0.943816  | 832.5   |
| ENSGALT0000 protein kinase, AMP-activated, gar    | PRKAG3   | 0.986252  | 303.5   |
| ENSGALT0000 protein kinase, cAMP-dependent, r     | PRKAR1A  | 0.983599  | 7179.85 |
| ENSGALT0000 protein kinase, cAMP-dependent, r     | PRKAR1B  | 0.842783  | 922     |
| ENSGALT0000 protein kinase, cAMP-dependent, r     | PRKAR2A  | 0.943236  | 4220    |
| ENSGALT0000 protein kinase, cAMP-dependent, r     | PRKAR2B  | 0.862551  | 333.5   |
| ENSGALT0000 protein kinase C, alpha               | PRKCA    | 0.929223  | 859.5   |
| ENSGALT0000 protein kinase C, beta                | PRKCB    | 0.61624   | 759.504 |
| ENSGALT0000 protein kinase C, delta               | PRKCD    | 0.883987  | 742.007 |
| ENSGALT0000 protein kinase C, epsilon             | PRKCE    | 0.732744  | 402.5   |
| ENSGALT0000 protein kinase C, eta                 | PRKCH    | 0.990138  | 268.5   |
| ENSGALT0000 protein kinase C, iota                | PRKCI    | 0.992913  | 2849.45 |
| ENSGALT0000 protein kinase C, zeta                | PRKCZ    | 0.993712  | 533     |
| ENSGALT0000 protein kinase D1                     | PRKD1    | 0.988139  | 1118.49 |
| ENSGALT0000 protein kinase D3                     | PRKD3    | 0.881254  | 482     |
| ENSGALT0000 protein kinase, DNA-activated, cata   | PRKDC    | 0.986151  | 2438.07 |
| ENSGALT0000 protein kinase, cGMP-dependent, t     | PRKG1    | 0.706582  | 644.502 |
| ENSGALT0000 protein kinase, cGMP-dependent, t     | PRKG2    | 0.991792  | 253.5   |
| ENSGALT0000 PRKR interacting protein 1 (IL11 in   | PRKRIP1  | 0.898902  | 779     |
| ENSGALT0000 protein-kinase, interferon-inducible  | PRKRIR   | 0.966928  | 298.5   |
| ENSGALT0000 protein kinase, X-linked              | PRKX     | 0.994453  | 467.5   |
| ENSGALT0000 prolactin                             | PRL      | 0.860468  | 3.5     |
| ENSGALT0000 prolactin releasing hormone recept    | PRLHR    | 0.959507  | 15.5    |
| ENSGALT0000 prolactin receptor                    | PRLR     | 0.983444  | 64      |
| ENSGALT0000 protein arginine methyltransferase    | PRMT10   | 0.939331  | 1148.5  |

|             |                                        |           |          |         |
|-------------|----------------------------------------|-----------|----------|---------|
| ENSGALT0000 | protein arginine methyltransferase     | PRMT3     | 0.934392 | 929.5   |
| ENSGALT0000 | protein arginine methyltransferase     | PRMT7     | 0.947175 | 757.5   |
| ENSGALT0000 | protein arginine methyltransferase     | PRMT8     | 0.99815  | 489     |
| ENSGALT0000 | prion protein                          | PRNP      | 0.791488 | 1025.13 |
| ENSGALT0000 | protein C (inactivator of coagulation) | PROC      | 0.912785 | 6.82824 |
| ENSGALT0000 | protein C receptor, endothelial        | PROCR     | 0.616095 | 83.5    |
| ENSGALT0000 | proline dehydrogenase (oxidase) 1      | PRODH     | 0.829482 | 155     |
| ENSGALT0000 | prokineticin 1                         | PROK1     | 0.295514 | 2.5     |
| ENSGALT0000 | prokineticin 2                         | PROK2     | 0.646882 | 33.5    |
| ENSGALT0000 | prominin 1                             | PROM1     | 0.952184 | 2101.49 |
| ENSGALT0000 | prominin 2                             | PROM2     | 0.914869 | 105.5   |
| ENSGALT0000 | protein S (alpha)                      | PROS1     | 0.988278 | 657.5   |
| ENSGALT0000 | ProSAPiP1 protein                      | PROSAPIP1 | 0.973625 | 1204    |
| ENSGALT0000 | proline synthetase co-transcribed h    | PROSC     | 0.846753 | 1200    |
| ENSGALT0000 | proline and serine rich 1              | PROSER1   | 0.972185 | 1479    |
| ENSGALT0000 | prospero-related homeobox 1            | PROX1     | 0.821532 | 1743    |
| ENSGALT0000 | prospero homeobox 2                    | PROX2     | 0.649519 | 0       |
| ENSGALT0000 | protein Z, vitamin K-dependent plas    | PROZ      | 0.106727 | 0.5     |
| ENSGALT0000 | PRP18 pre-mRNA processing factor       | PRPF18    | 0.880298 | 1103.5  |
| ENSGALT0000 | PRP19/PSO4 pre-mRNA processing         | PRPF19    | 0.892138 | 3028.4  |
| ENSGALT0000 | PRP3 pre-mRNA processing factor        | PRPF3     | 0.96957  | 4924.54 |
| ENSGALT0000 | PRP38 pre-mRNA processing factor       | PRPF38A   | 0.867405 | 1163    |
| ENSGALT0000 | PRP38 pre-mRNA processing factor       | PRPF38B   | 0.863212 | 821.834 |
| ENSGALT0000 | PRP39 pre-mRNA processing factor       | PRPF39    | 0.973901 | 2192.5  |
| ENSGALT0000 | PRP4 pre-mRNA processing factor        | PRPF4     | 0.866981 | 1327.5  |
| ENSGALT0000 | PRP40 pre-mRNA processing factor       | PRPF40A   | 0.958684 | 2927.03 |
| ENSGALT0000 | PRP4 pre-mRNA processing factor        | PRPF4B    | 0.973452 | 1948    |
| ENSGALT0000 | PRP6 pre-mRNA processing factor        | PRPF6     | 0.952017 | 4289.5  |
| ENSGALT0000 | PRP8 pre-mRNA processing factor        | PRPF8     | 0.966356 | 22084.5 |
| ENSGALT0000 | peripherin 2 (retinal degeneration, s  | PRPH2     | 0.464758 | 0       |
| ENSGALT0000 | phosphoribosyl pyrophosphate syn       | PRPS1     | 0.83693  | 5145    |
| ENSGALT0000 | phosphoribosyl pyrophosphate syn       | PRPS2     | 0.949929 | 295.501 |
| ENSGALT0000 | phosphoribosyl pyrophosphate syn       | PRPSAP1   | 0.821907 | 1192.5  |
| ENSGALT0000 | phosphoribosyl pyrophosphate syn       | PRPSAP2   | 0.9479   | 2061.5  |
| ENSGALT0000 | proline rich 11                        | PRR11     | 0.86501  | 192.5   |
| ENSGALT0000 | proline rich 13                        | PRR13     | 0.649519 | 0       |
| ENSGALT0000 | proline rich 14-like                   | PRR14L    | 0.980532 | 253     |
| ENSGALT0000 | proline rich 16                        | PRR16     | 0.956803 | 19      |
| ENSGALT0000 | proline rich 5 (renal)                 | PRR5      | 0.957115 | 1058    |
| ENSGALT0000 | proline rich 5 like                    | PRR5L     | 0.746395 | 50.5    |
| ENSGALT0000 | proline rich 9                         | PRR9      | ?        | 0       |
| ENSGALT0000 | proline-rich coiled-coil 1             | PRRC1     | 0.982078 | 1544.5  |
| ENSGALT0000 | proline-rich coiled-coil 2B            | PRRC2B    | 0.979082 | 10848   |
| ENSGALT0000 | proline rich Gla (G-carboxyglutamic    | PRRG1     | 0.976511 | 213.5   |
| ENSGALT0000 | proline rich Gla (G-carboxyglutamic    | PRRG3     | 0.968469 | 218     |
| ENSGALT0000 | proline rich Gla (G-carboxyglutamic    | PRRG4     | 0.992083 | 33.5    |
| ENSGALT0000 | paired related homeobox 1              | PRRX1     | 0.743378 | 714.962 |
| ENSGALT0000 | paired related homeobox 2              | PRRX2     | 0.962688 | 161.5   |
| ENSGALT0000 | protease, serine, 12 (neurotrypsin,    | PRSS12    | 0.862626 | 345     |
| ENSGALT0000 | protease, serine, 2 (trypsin 2)        | PRSS2     | 0.464758 | 0       |
| ENSGALT0000 | protease, serine, 3                    | PRSS3     | ?        | 0       |
| ENSGALT0000 | phosphoribosyl transferase domain      | PRTFDC1   | 0.954194 | 406     |
| ENSGALT0000 | protogenin                             | PRTG      | 0.826939 | 79      |
| ENSGALT0000 | prune homolog (Drosophila)             | PRUNE     | 0.722469 | 808     |
| ENSGALT0000 | prune homolog 2 (Drosophila)           | PRUNE2    | 0.966885 | 703.5   |
| ENSGALT0000 | prosaposin                             | PSAP      | 0.976656 | 17368.2 |

|                                                  |         |          |         |
|--------------------------------------------------|---------|----------|---------|
| ENSGALT0000 phosphoserine aminotransferase 1     | PSAT1   | 0.783837 | 246     |
| ENSGALT0000 prostate stem cell antigen           | PSCA    | 0.567585 | 6.5     |
| ENSGALT0000 pleckstrin and Sec7 domain containi  | PSD     | 0.867062 | 157.5   |
| ENSGALT0000 pleckstrin and Sec7 domain containi  | PSD2    | 0.717489 | 116     |
| ENSGALT0000 pleckstrin and Sec7 domain containi  | PSD3    | 0.946491 | 403.5   |
| ENSGALT0000 presenilin 1                         | PSEN1   | 0.974034 | 1065.49 |
| ENSGALT0000 presenilin 2 (Alzheimer disease 4)   | PSEN2   | 0.975575 | 914.494 |
| ENSGALT0000 PC4 and SFRS1 interacting protein    | PSIP1   | 0.969239 | 1112    |
| ENSGALT0000 protein serine kinase H1             | PSKH1   | 0.985639 | 469.5   |
| ENSGALT0000 proteasome (prosome, macropain)      | PSMA1   | 0.697867 | 4544.49 |
| ENSGALT0000 proteasome (prosome, macropain)      | PSMA2   | 0.876035 | 2276.45 |
| ENSGALT0000 proteasome (prosome, macropain)      | PSMA3   | 0.516233 | 3758.5  |
| ENSGALT0000 proteasome (prosome, macropain)      | PSMA4   | 0.833142 | 2862    |
| ENSGALT0000 proteasome alpha 5 subunit           | PSMA5   | 0.749618 | 2807.05 |
| ENSGALT0000 proteasome (prosome, macropain)      | PSMA6   | 0.468415 | 2716.5  |
| ENSGALT0000 proteasome (prosome, macropain)      | PSMA7   | 0.574666 | 2722    |
| ENSGALT0000 proteasome (prosome, macropain)      | PSMB1   | 0.217846 | 4535    |
| ENSGALT0000 proteasome (prosome, macropain)      | PSMB2   | 0.514084 | 3644    |
| ENSGALT0000 proteasome (prosome, macropain)      | PSMB3   | 0.477335 | 3156    |
| ENSGALT0000 proteasome (prosome, macropain)      | PSMB4   | 0.269639 | 6595.5  |
| ENSGALT0000 proteasome (prosome, macropain)      | PSMB7   | 0.578919 | 5451.14 |
| ENSGALT0000 proteasome (prosome, macropain)      | PSMC1   | 0.797657 | 3100.44 |
| ENSGALT0000 proteasome (prosome, macropain)      | PSMC2   | 0.821617 | 4272.92 |
| ENSGALT0000 proteasome (prosome, macropain)      | PSMC3   | 0.856766 | 3782.91 |
| ENSGALT0000 PSMC3 interacting protein            | PSMC3IP | 0.695965 | 494.5   |
| ENSGALT0000 proteasome (prosome, macropain)      | PSMC5   | 0.475363 | 5793.5  |
| ENSGALT0000 proteasome (prosome, macropain)      | PSMC6   | 0.836505 | 4599.09 |
| ENSGALT0000 proteasome (prosome, macropain)      | PSMD1   | 0.880956 | 5839.49 |
| ENSGALT0000 proteasome (prosome, macropain)      | PSMD10  | 0.408752 | 883     |
| ENSGALT0000 proteasome (prosome, macropain)      | PSMD11  | 0.598356 | 888.5   |
| ENSGALT0000 proteasome (prosome, macropain)      | PSMD12  | 0.762111 | 1869.5  |
| ENSGALT0000 proteasome (prosome, macropain)      | PSMD13  | 0.829449 | 4114.56 |
| ENSGALT0000 proteasome (prosome, macropain)      | PSMD14  | 0.817062 | 1477.5  |
| ENSGALT0000 proteasome (prosome, macropain)      | PSMD2   | 0.803262 | 7956.43 |
| ENSGALT0000 proteasome (prosome, macropain)      | PSMD3   | 0.708732 | 5486.77 |
| ENSGALT0000 proteasome (prosome, macropain)      | PSMD5   | 0.969881 | 1663    |
| ENSGALT0000 proteasome (prosome, macropain)      | PSMD6   | 0.568238 | 2139.5  |
| ENSGALT0000 proteasome (prosome, macropain)      | PSMD7   | 0.864836 | 2289.5  |
| ENSGALT0000 proteasome (prosome, macropain)      | PSMD9   | 0.681395 | 1771    |
| ENSGALT0000 proteasome (prosome, macropain)      | PSME3   | 0.902767 | 6533.13 |
| ENSGALT0000 proteasome (prosome, macropain)      | PSME4   | 0.969618 | 1497    |
| ENSGALT0000 proteasome (prosome, macropain)      | PSMF1   | 0.935329 | 4411.5  |
| ENSGALT0000 proteasome (prosome, macropain)      | PSMG1   | 0.94041  | 1370    |
| ENSGALT0000 proteasome (prosome, macropain)      | PSMG2   | 0.820742 | 728.5   |
| ENSGALT0000 proteasome (prosome, macropain)      | PSMG3   | 0.883405 | 2913.5  |
| ENSGALT0000 proteasome (prosome, macropain)      | PSMG4   | 0.217446 | 662     |
| ENSGALT0000 paraspeckle component 1              | PSPC1   | 0.856475 | 2919    |
| ENSGALT0000 phosphoserine phosphatase            | PSPH    | 0.556079 | 98.5    |
| ENSGALT0000 phosphoseryl-tRNA kinase             | PSTK    | 0.66641  | 304.5   |
| ENSGALT0000 proline-serine-threonine phosphata   | PSTPIP1 | 0.977537 | 14      |
| ENSGALT0000 proline-serine-threonine phosphata   | PSTPIP2 | 0.83346  | 3       |
| ENSGALT0000 platelet-activating factor receptor  | PTAFR   | 0.743749 | 5.5     |
| ENSGALT0000 protein prenyltransferase alpha sut  | PTAR1   | 0.993572 | 158     |
| ENSGALT0000 polypyrimidine tract binding protein | PTBP1   | 0.988173 | 15367.7 |
| ENSGALT0000 polypyrimidine tract binding protein | PTBP2   | 0.849215 | 529.5   |
| ENSGALT0000 polypyrimidine tract binding protein | PTBP3   | 0.974518 | 190.5   |

|             |                                      |         |          |         |
|-------------|--------------------------------------|---------|----------|---------|
| ENSGALT0000 | pentatricopeptide repeat domain 1    | PTCD1   | 0.959983 | 571     |
| ENSGALT0000 | pentatricopeptide repeat domain 2    | PTCD2   | 0.93884  | 210     |
| ENSGALT0000 | Pentatricopeptide repeat domain 3    | PTCD3   | 0.94599  | 1087.5  |
| ENSGALT0000 | patched 1                            | PTCH1   | 0.941282 | 802     |
| ENSGALT0000 | patched domain containing 1          | PTCHD1  | 0.991128 | 639.5   |
| ENSGALT0000 | patched domain containing 2          | PTCHD2  | 0.956078 | 1702    |
| ENSGALT0000 | patched domain containing 4          | PTCHD4  | 0.701609 | 4       |
| ENSGALT0000 | phosphatidylserine synthase 1        | PTDSS1  | 0.941079 | 2742.5  |
| ENSGALT0000 | phosphatidylserine synthase 2        | PTDSS2  | 0.958921 | 789     |
| ENSGALT0000 | phosphatase and tensin homolog       | PTEN    | 0.973851 | 1642    |
| ENSGALT0000 | phosphotriesterase related           | PTER    | 0.943455 | 326.5   |
| ENSGALT0000 | prostaglandin E receptor 3, subtype  | PTGER3  | 0.743672 | 23.5    |
| ENSGALT0000 | prostaglandin E receptor 4 (subtype  | PTGER4  | 0.974167 | 43      |
| ENSGALT0000 | prostaglandin E synthase             | PTGES   | 0.683307 | 65      |
| ENSGALT0000 | prostaglandin E synthase 2           | PTGES2  | 0.843131 | 1333    |
| ENSGALT0000 | prostaglandin F receptor (FP)        | PTGFR   | 0.986166 | 108     |
| ENSGALT0000 | prostaglandin F2 receptor negative   | PTGFRN  | 0.964253 | 1933.5  |
| ENSGALT0000 | prostaglandin reductase 1            | PTGR1   | 0.862708 | 1110    |
| ENSGALT0000 | prostaglandin reductase 2            | PTGR2   | 0.986794 | 756     |
| ENSGALT0000 | prostaglandin-endoperoxide syntha    | PTGS1   | 0.997097 | 249     |
| ENSGALT0000 | prostaglandin-endoperoxide syntha    | PTGS2   | 0.830606 | 30.5    |
| ENSGALT0000 | parathyroid hormone                  | PTH     | 0.943934 | 1       |
| ENSGALT0000 | parathyroid hormone 1 receptor       | PTH1R   | 0.85294  | 11      |
| ENSGALT0000 | parathyroid hormone-like hormone     | PTHLH   | 0.882548 | 108.5   |
| ENSGALT0000 | PTK2 protein tyrosine kinase 2       | PTK2    | 0.983898 | 7515.18 |
| ENSGALT0000 | PTK2B protein tyrosine kinase 2 be   | PTK2B   | 0.844806 | 159     |
| ENSGALT0000 | PTK7 protein tyrosine kinase 7       | PTK7    | 0.883754 | 17519   |
| ENSGALT0000 | parathyrosin                         | PTMS    | 0.339897 | 1374    |
| ENSGALT0000 | pleiotrophin                         | PTN     | 0.528158 | 1804.5  |
| ENSGALT0000 | protein tyrosine phosphatase type I  | PTP4A1  | 0.946531 | 8799.5  |
| ENSGALT0000 | protein tyrosine phosphatase type I  | PTP4A2  | 0.956563 | 2589.5  |
| ENSGALT0000 | protein tyrosine phosphatase type I  | PTP4A3  | 0.939907 | 486.5   |
| ENSGALT0000 | protein tyrosine phosphatase doma    | PTPDC1  | 0.997155 | 288     |
| ENSGALT0000 | protein tyrosine phosphatase-like (I | PTPLA   | 0.925606 | 89.5    |
| ENSGALT0000 | protein tyrosine phosphatase-like A  | PTPLAD1 | 0.971606 | 2411.05 |
| ENSGALT0000 | protein tyrosine phosphatase-like A  | PTPLAD2 | 0.832149 | 19.5    |
| ENSGALT0000 | protein tyrosine phosphatase-like (I | PTPLB   | 0.947136 | 2119.53 |
| ENSGALT0000 | protein tyrosine phosphatase, non-I  | PTPN1   | 0.933805 | 459.499 |
| ENSGALT0000 | protein tyrosine phosphatase, non-I  | PTPN11  | 0.968591 | 1023.82 |
| ENSGALT0000 | protein tyrosine phosphatase, non-I  | PTPN12  | 0.94907  | 929.5   |
| ENSGALT0000 | protein tyrosine phosphatase, non-I  | PTPN13  | 0.910577 | 2157    |
| ENSGALT0000 | protein tyrosine phosphatase, non-I  | PTPN14  | 0.964727 | 763.5   |
| ENSGALT0000 | protein tyrosine phosphatase, non-I  | PTPN2   | 0.916045 | 1110    |
| ENSGALT0000 | protein tyrosine phosphatase, non-I  | PTPN21  | 0.941993 | 342.002 |
| ENSGALT0000 | protein tyrosine phosphatase, non-I  | PTPN22  | 0.99859  | 43.5    |
| ENSGALT0000 | protein tyrosine phosphatase, non-I  | PTPN4   | 0.996274 | 1012    |
| ENSGALT0000 | protein tyrosine phosphatase, non-I  | PTPN5   | 0.779914 | 198     |
| ENSGALT0000 | protein tyrosine phosphatase, non-I  | PTPN6   | 0.920719 | 109.5   |
| ENSGALT0000 | protein tyrosine phosphatase, non-I  | PTPN7   | 0.944643 | 40.5    |
| ENSGALT0000 | protein tyrosine phosphatase, non-I  | PTPN9   | 0.718469 | 1962    |
| ENSGALT0000 | protein tyrosine phosphatase, rece   | PTPRA   | 0.958294 | 4199.92 |
| ENSGALT0000 | protein tyrosine phosphatase, rece   | PTPRB   | 0.985597 | 255     |
| ENSGALT0000 | protein tyrosine phosphatase, rece   | PTPRC   | 0.914748 | 32      |
| ENSGALT0000 | protein tyrosine phosphatase, rece   | PTPRD   | 0.923087 | 562.5   |
| ENSGALT0000 | protein tyrosine phosphatase, rece   | PTPRE   | 0.789156 | 168.5   |
| ENSGALT0000 | protein tyrosine phosphatase, rece   | PTPRF   | 0.939878 | 28246.5 |

|             |                                      |              |          |         |
|-------------|--------------------------------------|--------------|----------|---------|
| ENSGALT0000 | protein tyrosine phosphatase, rece   | PTPRG        | 0.895884 | 1284    |
| ENSGALT0000 | protein tyrosine phosphatase, rece   | PTPRJ        | 0.994437 | 637.5   |
| ENSGALT0000 | protein tyrosine phosphatase, rece   | PTPRK        | 0.980424 | 2834    |
| ENSGALT0000 | protein tyrosine phosphatase, rece   | PTPRM        | 0.811487 | 368     |
| ENSGALT0000 | protein tyrosine phosphatase, rece   | PTPRN2       | 0.784481 | 163     |
| ENSGALT0000 | protein tyrosine phosphatase, rece   | PTPRO        | 0.778741 | 601.008 |
| ENSGALT0000 | protein tyrosine phosphatase, rece   | PTPRQ        | 0.742489 | 122     |
| ENSGALT0000 | protein tyrosine phosphatase, rece   | PTPRR        | 0.612272 | 492     |
| ENSGALT0000 | protein tyrosine phosphatase, rece   | PTPRS        | 0.970334 | 13786.3 |
| ENSGALT0000 | protein tyrosine phosphatase, rece   | PTPRT        | 0.897258 | 1545.97 |
| ENSGALT0000 | protein tyrosine phosphatase, rece   | PTPRU        | 0.787854 | 1619.01 |
| ENSGALT0000 | protein tyrosine phosphatase, rece   | PTPRZ1       | 0.821029 | 2731.43 |
| ENSGALT0000 | polymerase I and transcript release  | PTRF         | 0.835593 | 286     |
| ENSGALT0000 | peptidyl-tRNA hydrolase 2            | PTRH2        | 0.532735 | 1026.5  |
| ENSGALT0000 | peptidyl-tRNA hydrolase domain cc    | PTRHD1       | 0.447134 | 544.5   |
| ENSGALT0000 | 6-pyruvoyltetrahydropterin synthas   | PTS          | 0.862985 | 940.002 |
| ENSGALT0000 | pituitary tumor-transforming 1       | PTTG1        | 0.810282 | 717.5   |
| ENSGALT0000 | pituitary tumor-transforming 1 inter | PTTG1IP      | 0.966131 | 2627    |
| ENSGALT0000 | pentraxin 3, long                    | PTX3         | 0.824829 | 387.5   |
| ENSGALT0000 | poly-U binding splicing factor 60KD  | PUF60        | 0.823089 | 4709.66 |
| ENSGALT0000 | pumilio homolog 1 (Drosophila)       | PUM1         | 0.96994  | 6386.39 |
| ENSGALT0000 | pumilio homolog 2 (Drosophila)       | PUM2         | 0.981313 | 4794.89 |
| ENSGALT0000 | purine-rich element binding protein  | PURA         | 0.968588 | 141     |
| ENSGALT0000 | purine-rich element binding protein  | PURB         | 0.894907 | 393.501 |
| ENSGALT0000 | purine-rich element binding protein  | PURG         | 0.981126 | 20      |
| ENSGALT0000 | pseudouridylate synthase 1           | PUS1         | 0.893826 | 1028.68 |
| ENSGALT0000 | pseudouridylate synthase 10          | PUS10        | 0.952122 | 386.5   |
| ENSGALT0000 | pseudouridylate synthase 7 homolc    | PUS7         | 0.969352 | 769     |
| ENSGALT0000 | pseudouridylate synthase 7 homolc    | PUS7L        | 0.97197  | 282.5   |
| ENSGALT0000 | pseudouridylate synthase-like 1      | PUSL1        | 0.98105  | 221     |
| ENSGALT0000 | parvalbumin                          | PVALB        | 0.667458 | 124     |
| ENSGALT0000 | poliovirus receptor-related 1 (herpe | PVRL1        | 0.873512 | 2720.5  |
| ENSGALT0000 | poliovirus receptor-related 3        | PVRL3        | 0.926692 | 754     |
| ENSGALT0000 | PWP1 homolog (S. cerevisiae)         | PWP1         | 0.935014 | 1635.02 |
| ENSGALT0000 | PWP2 periodic tryptophan protein l   | PWP2         | 0.945578 | 529.124 |
| ENSGALT0000 | PWWP domain containing 2A            | PWWP2A       | 0.933999 | 321     |
| ENSGALT0000 | PWWP domain containing 2B            | PWWP2B       | 0.927918 | 543.5   |
| ENSGALT0000 | peroxidasin homolog (Drosophila)     | PXDN         | 0.979679 | 2940.5  |
| ENSGALT0000 | peroxidasin homolog (Drosophila)-l   | PXDNL        | 0.879368 | 66.5    |
| ENSGALT0000 | PX domain containing serine/threor   | PXK          | 0.933352 | 223     |
| ENSGALT0000 | peroxisomal membrane protein 4, 2    | PXMP4        | 0.767868 | 1092    |
| ENSGALT0000 | paxillin                             | PXN          | 0.90587  | 1859    |
| ENSGALT0000 | pyrroline-5-carboxylate reductase f  | PYCR2        | 0.872284 | 727     |
| ENSGALT0000 | pyrroline-5-carboxylate reductase-l  | PYCR1        | 0.464818 | 1240    |
| ENSGALT0000 | phosphorylase, glycogen; brain       | PYGB         | 0.940013 | 2869.41 |
| ENSGALT0000 | phosphorylase, glycogen, liver       | PYGL         | 0.94647  | 7125.5  |
| ENSGALT0000 | pygopus homolog 1 (Drosophila)       | PYGO1        | 0.95793  | 697.5   |
| ENSGALT0000 | pyridine nucleotide-disulphide oxid  | PYROXD1      | 0.841035 | 156.5   |
| ENSGALT0000 | pyridine nucleotide-disulphide oxid  | PYROXD2      | 0.931775 | 87.5    |
| ENSGALT0000 | Uncharacterized protein              | Q0ZM05_CHICK | 0.678226 | 11      |
| ENSGALT0000 | Taste receptor type 2                | Q2AB82_CHICK | 0.697457 | 2.5     |
| ENSGALT0000 | Uncharacterized protein              | Q5F3E9_CHICK | 0.985045 | 9526.72 |
| ENSGALT0000 | Uncharacterized protein              | Q5J1N8_CHICK | 0.80844  | 206     |
| ENSGALT0000 | Uncharacterized protein              | Q5MQR1_CHICK | 0.586254 | 4       |
| ENSGALT0000 | CX3C chemokineUncharacterized        | Q5UHA2_CHICK | 0.918767 | 37.5    |
| ENSGALT0000 | Putative uncharacterized protein     | Q5ZHS2_CHICK | 0.341257 | 457     |

|                                                   |              |          |         |
|---------------------------------------------------|--------------|----------|---------|
| ENSGALT0000 T-cell leukemia virus enhancer fact   | Q5ZHS5_CHICK | 0.870116 | 417.001 |
| ENSGALT0000 Uncharacterized protein               | Q5ZHT9_CHICK | 0.890858 | 1700.49 |
| ENSGALT0000 Uncharacterized protein               | Q5ZI15_CHICK | 0.922994 | 812.5   |
| ENSGALT0000 Uncharacterized protein               | Q5ZI19_CHICK | 0.964653 | 1620    |
| ENSGALT0000 hypothetical protein LOC427551        | Q5ZI21_CHICK | 0.95251  | 2243.99 |
| ENSGALT0000 Uncharacterized protein               | Q5ZI68_CHICK | 0.983479 | 1169.5  |
| ENSGALT0000 Uncharacterized protein               | Q5ZI75_CHICK | 0.876565 | 63.5    |
| ENSGALT0000 hypothetical protein LOC428168        | Q5ZIS2_CHICK | 0.955937 | 1086    |
| ENSGALT0000 Uncharacterized protein               | Q5ZIY1_CHICK | 0.953677 | 1506    |
| ENSGALT0000 Uncharacterized protein               | Q5ZKW3_CHICK | 0.993444 | 1337.49 |
| ENSGALT0000 Uncharacterized protein               | Q5ZKW6_CHICK | 0.938458 | 1409    |
| ENSGALT0000 Uncharacterized protein               | Q5ZKZ3_CHICK | 0.920911 | 21329.7 |
| ENSGALT0000 microtubule-associated proteins 1A    | Q5ZLF8_CHICK | 0.935066 | 5311    |
| ENSGALT0000 transmembrane 7 superfamily memr      | Q5ZLT1_CHICK | 0.692493 | 455.501 |
| ENSGALT0000 Uncharacterized protein               | Q5ZLW4_CHICK | 0.999031 | 1156.5  |
| ENSGALT0000 Putative uncharacterized protein      | Q5ZM75_CHICK | 0.564769 | 1742.5  |
| ENSGALT0000 hypothetical protein LOC427256        | Q5ZMK1_CHICK | 0.983405 | 309.5   |
| ENSGALT0000 Uncharacterized protein               | Q5ZMN4_CHICK | 0.954561 | 4250.5  |
| ENSGALT0000 Rolly proteinUncharacterized prote    | Q6BDI7_CHICK | 0.550328 | 1302.5  |
| ENSGALT0000 Ribosomal protein L17Uncharacter      | Q6EE61_CHICK | 0.89508  | 3541.39 |
| ENSGALT0000 cytokeratin type II                   | Q6PVZ5_CHICK | 0.744388 | 80.3322 |
| ENSGALT0000 Protocadherin gammaC5-like            | Q6V0P2_CHICK | 0.9179   | 107.5   |
| ENSGALT0000 hypothetical protein LOC407087        | Q6VXX8_CHICK | 0.485412 | 1       |
| ENSGALT0000 Fructose-bisphosphate aldolase        | Q7LZE8_CHICK | 0.966408 | 280.5   |
| ENSGALT0000 12K serum protein, beta-2-m cross     | Q7LZS1_CHICK | ?        | 0       |
| ENSGALT0000 Uncharacterized protein               | Q804C5_CHICK | 0.651529 | 51      |
| ENSGALT0000 Uncharacterized protein               | Q8AV15_CHICK | 0.905501 | 8.5     |
| ENSGALT0000 Secreted chemorepellent semapho       | Q8AXA8_CHICK | 0.982216 | 4866.13 |
| ENSGALT0000 Uncharacterized protein               | Q8QGG9_CHICK | 0.797159 | 2841.5  |
| ENSGALT0000 CFUT9Uncharacterized protein          | Q8UWC1_CHICK | 0.78836  | 52      |
| ENSGALT0000 TenascinUncharacterized protein       | Q90996_CHICK | 0.780395 | 77.5    |
| ENSGALT0000 Gallus gallus                         | Q91954_CHICK | 0.386988 | 3754.73 |
| ENSGALT0000 Uncharacterized protein               | Q98SE8_CHICK | 0.967132 | 1319.5  |
| ENSGALT0000 Uncharacterized protein               | Q9DDF5_CHICK | 0.80732  | 2355.02 |
| ENSGALT0000 Uncharacterized protein               | Q9DEH4_CHICK | 0.919762 | 319     |
| ENSGALT0000 Microtubule-associated protein        | Q9PRV3_CHICK | 0.594912 | 967     |
| ENSGALT0000 Uncharacterized protein               | Q9PRY6_CHICK | 0.164317 | 0       |
| ENSGALT0000 Uncharacterized protein               | Q9PST8_CHICK | 0.997372 | 648.5   |
| ENSGALT0000 Uncharacterized protein               | Q9YGR0_CHICK | 0.978337 | 2242.51 |
| ENSGALT0000 Insulin receptor related tyrosine kin | Q9YI41_CHICK | 0.839573 | 19.5    |
| ENSGALT0000 glutaminyl-tRNA synthetase            | QARS         | 0.693271 | 2722    |
| ENSGALT0000 quinoid dihydropteridine reductase    | QDPR         | 0.522572 | 120     |
| ENSGALT0000 quaking homolog, KH domain RNA QKI    |              | 0.956223 | 1670.5  |
| ENSGALT0000 glutaminyl-peptide cyclotransferase   | QPCT         | 0.866638 | 1313.5  |
| ENSGALT0000 glutaminyl-peptide cyclotransferase   | QPCTL        | 0.75078  | 1507    |
| ENSGALT0000 pyroglutamylated RFamide peptide      | QRFPR        | 0.892141 | 12.5    |
| ENSGALT0000 glutamine-rich 1                      | QRICH1       | 0.953995 | 3199.5  |
| ENSGALT0000 glutamine rich 2                      | QRICH2       | 0.694388 | 18      |
| ENSGALT0000 glutaminyl-tRNA synthase (glutami     | QRSL1        | 0.927401 | 451.5   |
| ENSGALT0000 glutamine and serine rich 1           | QSER1        | 0.9774   | 2140    |
| ENSGALT0000 quiescin Q6 sulfhydryl oxidase 1      | QSOX1        | 0.977223 | 2063.5  |
| ENSGALT0000 quiescin Q6 sulfhydryl oxidase 2      | QSOX2        | 0.947234 | 874     |
| ENSGALT0000 queuine tRNA-ribosyltransferase dr    | QTRTD1       | 0.886615 | 1800.5  |
| ENSGALT0000 R3H domain and coiled-coil contain    | R3HCC1       | 0.964178 | 3198.45 |
| ENSGALT0000 R3H domain containing 1               | R3HDM1       | 0.889747 | 1748    |
| ENSGALT0000 R3H domain containing 2               | R3HDM2       | 0.751379 | 1384    |



|                                                  |           |          |         |
|--------------------------------------------------|-----------|----------|---------|
| ENSGALT0000 R3H domain containing 4              | R3HDM4    | 0.915746 | 1214    |
| ENSGALT0000 R3H domain containing-like           | R3HDML    | 0.335101 | 14.5    |
| ENSGALT0000 RAB10, member RAS oncogene fa        | RAB10     | 0.846425 | 2070.5  |
| ENSGALT0000 RAB11A, member RAS oncogene f        | RAB11A    | 0.858206 | 3382    |
| ENSGALT0000 RAB11B, member RAS oncogene f        | RAB11B    | 0.875433 | 8572    |
| ENSGALT0000 RAB11 family interacting protein 1 ( | RAB11FIP1 | 0.998213 | 673     |
| ENSGALT0000 RAB11 family interacting protein 2 ( | RAB11FIP2 | 0.997537 | 1195    |
| ENSGALT0000 RAB11 family interacting protein 3 ( | RAB11FIP3 | 0.947162 | 599.5   |
| ENSGALT0000 RAB11 family interacting protein 4 ( | RAB11FIP4 | 0.99403  | 1034.5  |
| ENSGALT0000 RAB11 family interacting protein 5 ( | RAB11FIP5 | 0.972989 | 305     |
| ENSGALT0000 RAB14, member RAS oncogene fa        | RAB14     | 0.929914 | 4332.5  |
| ENSGALT0000 RAB17, member RAS oncogene fa        | RAB17     | 0.293254 | 2.5     |
| ENSGALT0000 RAB18, member RAS oncogene fa        | RAB18     | 0.873181 | 2358.5  |
| ENSGALT0000 RAB19, member RAS oncogene fa        | RAB19     | 0.963013 | 238     |
| ENSGALT0000 RAB1A, member RAS oncogene fa        | RAB1A     | 0.878151 | 4929    |
| ENSGALT0000 RAB20, member RAS oncogene fa        | RAB20     | 0.892601 | 258.5   |
| ENSGALT0000 RAB21, member RAS oncogene fa        | RAB21     | 0.869445 | 834     |
| ENSGALT0000 RAB22A, member RAS oncogene f        | RAB22A    | 0.940886 | 718     |
| ENSGALT0000 RAB23, member RAS oncogene fa        | RAB23     | 0.925841 | 313.5   |
| ENSGALT0000 RAB24, member RAS oncogene fa        | RAB24     | 0.446495 | 753.5   |
| ENSGALT0000 RAB26, member RAS oncogene fa        | RAB26     | 0.525783 | 156.5   |
| ENSGALT0000 RAB27A, member RAS oncogene f        | RAB27A    | 0.980445 | 415.5   |
| ENSGALT0000 RAB28, member RAS oncogene fa        | RAB28     | 0.936701 | 284.5   |
| ENSGALT0000 RAB2A, member RAS oncogene fa        | RAB2A     | 0.932117 | 2767.99 |
| ENSGALT0000 RAB30, member RAS oncogene fa        | RAB30     | 0.868655 | 631.5   |
| ENSGALT0000 RAB31, member RAS oncogene fa        | RAB31     | 0.983764 | 143.5   |
| ENSGALT0000 RAB32, member RAS oncogene fa        | RAB32     | 0.953447 | 202     |
| ENSGALT0000 RAB33B, member RAS oncogene f        | RAB33B    | 0.892807 | 1218.5  |
| ENSGALT0000 RAB35, member RAS oncogene fa        | RAB35     | 0.941337 | 1348.84 |
| ENSGALT0000 RAB36, member RAS oncogene fa        | RAB36     | 0.717286 | 96.5    |
| ENSGALT0000 RAB38, member RAS oncogene fa        | RAB38     | 0.888069 | 5       |
| ENSGALT0000 RAB39A, member RAS oncogene f        | RAB39A    | 0.92051  | 52      |
| ENSGALT0000 RAB39B, member RAS oncogene f        | RAB39B    | 0.902795 | 591.5   |
| ENSGALT0000 RAB3B, member RAS oncogene fa        | RAB3B     | 0.928696 | 98      |
| ENSGALT0000 RAB3 GTPase activating protein s     | RAB3GAP1  | 0.966773 | 2183    |
| ENSGALT0000 RAB3 GTPase activating protein s     | RAB3GAP2  | 0.969527 | 1555.5  |
| ENSGALT0000 RAB3A interacting protein (rabin3)-  | RAB3IL1   | 0.89496  | 1153    |
| ENSGALT0000 RAB3A interacting protein (rabin3)   | RAB3IP    | 0.973765 | 2845.5  |
| ENSGALT0000 RAB40B, member RAS oncogene f        | RAB40B    | 0.924504 | 36.5    |
| ENSGALT0000 RAB40C, member RAS oncogene          | RAB40C    | 0.959015 | 515     |
| ENSGALT0000 RAB43, member RAS oncogene fa        | RAB43     | 0.981785 | 412     |
| ENSGALT0000 RAB4A, member RAS oncogene fa        | RAB4A     | 0.968893 | 830     |
| ENSGALT0000 RAB5A, member RAS oncogene fa        | RAB5A     | 0.921868 | 1494    |
| ENSGALT0000 RAB5C, member RAS oncogene fa        | RAB5C     | 0.678738 | 3231.01 |
| ENSGALT0000 RAB6A, member RAS oncogene fa        | RAB6A     | 0.793622 | 1899.01 |
| ENSGALT0000 RAB7A, member RAS oncogene fa        | RAB7A     | 0.832035 | 3179.5  |
| ENSGALT0000 RAB7, member RAS oncogene fa         | RAB7L1    | 0.950839 | 190     |
| ENSGALT0000 RAB8A, member RAS oncogene fa        | RAB8A     | 0.83044  | 4800.5  |
| ENSGALT0000 RAB8B, member RAS oncogene fa        | RAB8B     | 0.851824 | 531.5   |
| ENSGALT0000 RAB9A, member RAS oncogene fa        | RAB9A     | 0.9467   | 682     |
| ENSGALT0000 rabaptin, RAB GTPase binding effe    | RABEP1    | 0.933259 | 1612.01 |
| ENSGALT0000 Rab9 effector protein with kelch mc  | RABEPK    | 0.785124 | 1080.5  |
| ENSGALT0000 RAB GTPase activating protein 1      | RABGAP1   | 0.931401 | 1918.5  |
| ENSGALT0000 RAB GTPase activating protein 1-li   | RABGAP1L  | 0.987273 | 1129.99 |
| ENSGALT0000 RAB guanine nucleotide exchange      | RABGEF1   | 0.913213 | 601     |
| ENSGALT0000 Rab geranylgeranyltransferase, bel   | RABGGB    | 0.880892 | 744     |

|                                                  |          |          |         |
|--------------------------------------------------|----------|----------|---------|
| ENSGALT0000 RAB interacting factor               | RABIF    | 0.328299 | 521.5   |
| ENSGALT0000 RAB, member of RAS oncogene fa       | RABL2B   | 0.803458 | 366.5   |
| ENSGALT0000 RAB, member of RAS oncogene fa       | RABL3    | 0.967357 | 725.998 |
| ENSGALT0000 RAB, member RAS oncogene fami        | RABL5    | 0.984529 | 318     |
| ENSGALT0000 ras-related C3 botulinum toxin subε  | RAC1     | 0.9021   | 3397.98 |
| ENSGALT0000 ras-related C3 botulinum toxin subε  | RAC2     | 0.138282 | 17      |
| ENSGALT0000 ras-related C3 botulinum toxin subε  | RAC3     | 0.859603 | 2266.02 |
| ENSGALT0000 Rac GTPase activating protein 1      | RACGAP1  | 0.823488 | 1186.5  |
| ENSGALT0000 RAD1 homolog (S. pombe)              | RAD1     | 0.923192 | 260     |
| ENSGALT0000 RAD17 homolog (S. pombe)             | RAD17    | 0.945096 | 356     |
| ENSGALT0000 RAD18 homolog (S. cerevisiae)        | RAD18    | 0.883675 | 706     |
| ENSGALT0000 RAD21 homolog (S. pombe)             | RAD21    | 0.94231  | 4739    |
| ENSGALT0000 RAD21-like 1 (S. pombe)              | RAD21L1  | 0.863143 | 69.5    |
| ENSGALT0000 RAD23 homolog B (S. cerevisiae)      | RAD23B   | 0.91627  | 1711    |
| ENSGALT0000 RAD50 homolog (S. cerevisiae)        | RAD50    | 0.975502 | 1045.99 |
| ENSGALT0000 RAD51 homolog (S. cerevisiae)        | RAD51    | 0.809915 | 1104.94 |
| ENSGALT0000 RAD51 associated protein 1           | RAD51AP1 | 0.979851 | 245.5   |
| ENSGALT0000 RAD51 homolog B (S. cerevisiae)      | RAD51B   | 0.914031 | 70.5    |
| ENSGALT0000 RAD51 homolog C (S. cerevisiae)      | RAD51C   | 0.880452 | 408.001 |
| ENSGALT0000 RAD51 homolog D (S. cerevisiae)      | RAD51D   | 0.872774 | 586     |
| ENSGALT0000 RAD52 homolog (S. cerevisiae)        | RAD52    | 0.903358 | 400.5   |
| ENSGALT0000 RAD54 homolog B (S. cerevisiae)      | RAD54B   | 0.935534 | 454.5   |
| ENSGALT0000 RAD54-like (S. cerevisiae)           | RAD54L   | 0.917139 | 602.006 |
| ENSGALT0000 RAD54-like 2 (S. cerevisiae)         | RAD54L2  | 0.930345 | 2635    |
| ENSGALT0000 RAD9 homolog A                       | RAD9A    | 0.955427 | 325.5   |
| ENSGALT0000 RAD9 homolog B (S. pombe)            | RAD9B    | 0.926975 | 5       |
| ENSGALT0000 Ras association and DIL domains      | RADIL    | 0.780684 | 96.5    |
| ENSGALT0000 RAE1 RNA export 1 homolog (S. p      | RAE1     | 0.967919 | 824.994 |
| ENSGALT0000 v-raf-1 murine leukemia viral oncog  | RAF1     | 0.993277 | 1740    |
| ENSGALT0000 recombination activating gene 1      | RAG1     | 0.150565 | 0       |
| ENSGALT0000 V(D)J recombination-activating pro   | RAG2     | 0.834394 | 7.5     |
| ENSGALT0000 renal tumor antigen                  | RAGE     | 0.956857 | 108.5   |
| ENSGALT0000 retinoic acid induced 1              | RAI1     | 0.86226  | 2117    |
| ENSGALT0000 retinoic acid induced 14             | RAI14    | 0.984463 | 1375    |
| ENSGALT0000 retinoic acid induced 2              | RAI2     | 0.849207 | 514     |
| ENSGALT0000 v-ral simian leukemia viral oncogen  | RALA     | 0.988221 | 2558.5  |
| ENSGALT0000 v-ral simian leukemia viral oncogen  | RALB     | 0.919352 | 1337.5  |
| ENSGALT0000 ralA binding protein 1               | RALBP1   | 0.940765 | 2497.98 |
| ENSGALT0000 Ral GTPase activating protein, alpt  | RALGAPA1 | 0.956006 | 1864.5  |
| ENSGALT0000 Ral GTPase activating protein, alpt  | RALGAPA2 | 0.996625 | 1311    |
| ENSGALT0000 Ral GTPase activating protein, betε  | RALGAPB  | 0.982717 | 2533.5  |
| ENSGALT0000 ral guanine nucleotide dissociation  | RALGDS   | 0.849312 | 2472    |
| ENSGALT0000 Ral GEF with PH domain and SH3       | RALGPS1  | 0.981002 | 816     |
| ENSGALT0000 Ral GEF with PH domain and SH3       | RALGPS2  | 0.95859  | 2684.5  |
| ENSGALT0000 RNA binding protein, autoantigenic   | RALY     | 0.687296 | 365.999 |
| ENSGALT0000 RALY RNA binding protein-like        | RALYL    | 0.858929 | 84.5001 |
| ENSGALT0000 receptor (G protein-coupled) activit | RAMP1    | 0.390687 | 157.5   |
| ENSGALT0000 RAN, member RAS oncogene fami        | RAN      | 0.89278  | 9556.45 |
| ENSGALT0000 RAN binding protein 1                | RANBP1   | 0.946465 | 2113.99 |
| ENSGALT0000 RAN binding protein 10               | RANBP10  | 0.896807 | 809.5   |
| ENSGALT0000 RAN binding protein 17               | RANBP17  | 0.981792 | 219     |
| ENSGALT0000 RAN binding protein 3                | RANBP3   | 0.944218 | 2097    |
| ENSGALT0000 RAN binding protein 3-like           | RANBP3L  | 0.715235 | 88      |
| ENSGALT0000 RAN binding protein 9                | RANBP9   | 0.967756 | 1511    |
| ENSGALT0000 Ran GTPase activating protein 1      | RANGAP1  | 0.940578 | 2915    |
| ENSGALT0000 RAP1A, member of RAS oncogene        | RAP1A    | 0.943367 | 874.365 |

|                                                  |          |           |         |
|--------------------------------------------------|----------|-----------|---------|
| ENSGALT0000 RAP1B, member of RAS oncogene        | RAP1B    | 0.994164  | 4075.5  |
| ENSGALT0000 RAP1 GTPase activating protein       | RAP1GAP  | 0.720873  | 146.5   |
| ENSGALT0000 RAP1 GTPase activating protein 2     | RAP1GAP2 | 0.639202  | 147     |
| ENSGALT0000 RAP1, GTP-GDP dissociation stimu     | RAP1GDS1 | 0.655254  | 1978    |
| ENSGALT0000 RAP2A, member of RAS oncogene        | RAP2A    | 0.914211  | 607.793 |
| ENSGALT0000 RAP2B, member of RAS oncogene        | RAP2B    | 0.136995  | 0.5     |
| ENSGALT0000 RAP2C, member of RAS oncogene        | RAP2C    | 0.810561  | 1422.71 |
| ENSGALT0000 Rap guanine nucleotide exchange      | RAPGEF1  | 0.955625  | 2645    |
| ENSGALT0000 Rap guanine nucleotide exchange      | RAPGEF2  | 0.90035   | 1378.48 |
| ENSGALT0000 Rap guanine nucleotide exchange      | RAPGEF3  | 0.891637  | 1736    |
| ENSGALT0000 Rap guanine nucleotide exchange      | RAPGEF4  | 0.578913  | 261.5   |
| ENSGALT0000 Rap guanine nucleotide exchange      | RAPGEF5  | 0.667501  | 223     |
| ENSGALT0000 Rap guanine nucleotide exchange      | RAPGEF6  | 0.910993  | 1903.49 |
| ENSGALT0000 Ras association (RalGDS/AF-6) an     | RAPH1    | 0.965565  | 533     |
| ENSGALT0000 receptor-associated protein of the s | RAPSN    | 0.254786  | 14.5    |
| ENSGALT0000 retinoic acid receptor, beta         | RARB     | 0.764205  | 670     |
| ENSGALT0000 retinoic acid receptor responder (ta | RARRES1  | 0.774848  | 200     |
| ENSGALT0000 retinoic acid receptor responder (ta | RARRES2  | 0.661672  | 1638.5  |
| ENSGALT0000 arginyl-tRNA synthetase              | RARS     | 0.918535  | 2976    |
| ENSGALT0000 arginyl-tRNA synthetase 2, mitochc   | RARS2    | 0.968352  | 608     |
| ENSGALT0000 RAS p21 protein activator 2          | RASA2    | 0.993226  | 719.5   |
| ENSGALT0000 RAS p21 protein activator 3          | RASA3    | 0.925014  | 739.5   |
| ENSGALT0000 RAS p21 protein activator 4          | RASA4    | 0.850678  | 531     |
| ENSGALT0000 RAS protein activator like 1 (GAP1   | RASAL1   | 0.689337  | 2       |
| ENSGALT0000 RAS protein activator like 2         | RASAL2   | 0.945648  | 1250    |
| ENSGALT0000 RAS, dexamethasone-induced 1         | RASD1    | 0.615745  | 82.5    |
| ENSGALT0000 RASD family, member 2                | RASD2    | 0.683246  | 1       |
| ENSGALT0000 RasGEF domain family, member 1       | RASGEF1A | 0.772695  | 263     |
| ENSGALT0000 RasGEF domain family, member 1       | RASGEF1B | 0.979384  | 299.5   |
| ENSGALT0000 RasGEF domain family, member 1       | RASGEF1C | 0.881935  | 189.5   |
| ENSGALT0000 Ras protein-specific guanine nucle   | RASGRF2  | 0.7623    | 8.5     |
| ENSGALT0000 RAS guanyl releasing protein 1 (ca   | RASGRP1  | 0.897214  | 63.9999 |
| ENSGALT0000 RAS guanyl releasing protein 3 (ca   | RASGRP3  | 0.68959   | 70      |
| ENSGALT0000 RAS-like, family 10, member B        | RASL10B  | 0.556687  | 24      |
| ENSGALT0000 RAS-like, family 11, member A        | RASL11A  | 0.0150427 | 6.5     |
| ENSGALT0000 RAS-like, family 11, member B        | RASL11B  | 0.631916  | 2994    |
| ENSGALT0000 RAS-like, family 12                  | RASL12   | 0.496385  | 42.5    |
| ENSGALT0000 Ras association (RalGDS/AF-6) do     | RASSF2   | 0.677731  | 484.5   |
| ENSGALT0000 Ras association (RalGDS/AF-6) do     | RASSF3   | 0.768833  | 928.5   |
| ENSGALT0000 Ras association (RalGDS/AF-6) do     | RASSF5   | 0.818086  | 16      |
| ENSGALT0000 Ras association (RalGDS/AF-6) do     | RASSF6   | 0.950213  | 27      |
| ENSGALT0000 Ras association (RalGDS/AF-6) do     | RASSF7   | 0.943406  | 429     |
| ENSGALT0000 Ras association (RalGDS/AF-6) do     | RASSF8   | 0.860069  | 1003    |
| ENSGALT0000 Ras association (RalGDS/AF-6) do     | RASSF9   | 0.827887  | 418     |
| ENSGALT0000 ribonucleoprotein, PTB-binding 2     | RAVER2   | 0.968506  | 2516.5  |
| ENSGALT0000 Retinal homeobox protein Rx1         | RAX      | 0.482529  | 101     |
| ENSGALT0000 retinoblastoma 1                     | RB1      | 0.923282  | 1602.53 |
| ENSGALT0000 RB1-inducible coiled-coil 1          | RB1CC1   | 0.988934  | 1220.5  |
| ENSGALT0000 retinoblastoma binding protein 4     | RBBP4    | 0.908732  | 11805   |
| ENSGALT0000 retinoblastoma binding protein 5     | RBBP5    | 0.947395  | 2777    |
| ENSGALT0000 retinoblastoma binding protein 6     | RBBP6    | 0.938114  | 716     |
| ENSGALT0000 retinoblastoma binding protein 7     | RBBP7    | 0.880971  | 604.5   |
| ENSGALT0000 retinoblastoma binding protein 8     | RBBP8    | 0.798886  | 2206    |
| ENSGALT0000 ribosome binding factor A (putative  | RBFA     | 0.975805  | 391.001 |
| ENSGALT0000 RNA binding protein, fox-1 homoloç   | RBOX1    | 0.542337  | 93.1348 |
| ENSGALT0000 RNA binding protein, fox-1 homoloç   | RBOX2    | 0.90491   | 2574.36 |

|                                                     |        |          |         |
|-----------------------------------------------------|--------|----------|---------|
| ENSGALT0000 ribokinase                              | RBKS   | 0.987593 | 555     |
| ENSGALT0000 retinoblastoma-like 1 (p107)            | RBL1   | 0.956905 | 985.5   |
| ENSGALT0000 RNA binding motif protein 12            | RBM12  | 0.971904 | 2645    |
| ENSGALT0000 RNA binding motif protein 12B           | RBM12B | 0.980883 | 725.5   |
| ENSGALT0000 RNA binding motif protein 14            | RBM14  | 0.749392 | 844.5   |
| ENSGALT0000 RNA binding motif protein 15            | RBM15  | 0.911185 | 666.5   |
| ENSGALT0000 RNA binding motif protein 15B           | RBM15B | 0.932052 | 1760.5  |
| ENSGALT0000 RNA binding motif protein 17            | RBM17  | 0.93872  | 1460    |
| ENSGALT0000 RNA binding motif protein 18            | RBM18  | 0.875748 | 1160.5  |
| ENSGALT0000 RNA binding motif protein 19            | RBM19  | 0.900308 | 1190.99 |
| ENSGALT0000 RNA binding motif protein 22            | RBM22  | 0.906919 | 4097    |
| ENSGALT0000 RNA binding motif protein 24            | RBM24  | 0.531566 | 576.5   |
| ENSGALT0000 RNA binding motif protein 25            | RBM25  | 0.954901 | 1329    |
| ENSGALT0000 RNA binding motif protein 26            | RBM26  | 0.967466 | 3623.95 |
| ENSGALT0000 RNA binding motif protein 27            | RBM27  | 0.970735 | 1108    |
| ENSGALT0000 RNA binding motif protein 34            | RBM34  | 0.749081 | 871     |
| ENSGALT0000 RNA binding motif protein 38            | RBM38  | 0.708693 | 260.5   |
| ENSGALT0000 RNA binding motif protein 39            | RBM39  | 0.946091 | 4582    |
| ENSGALT0000 RNA binding motif protein 41            | RBM41  | 0.802216 | 354     |
| ENSGALT0000 RNA binding motif protein 43            | RBM43  | 0.965519 | 154     |
| ENSGALT0000 RNA binding motif protein 44            | RBM44  | 0.712777 | 2.5     |
| ENSGALT0000 RNA binding motif protein 45            | RBM45  | 0.941752 | 1381.5  |
| ENSGALT0000 RNA binding motif protein 46            | RBM46  | 0.856255 | 42      |
| ENSGALT0000 RNA binding motif protein 47            | RBM47  | 0.999966 | 1023.5  |
| ENSGALT0000 RNA binding motif protein 48            | RBM48  | 0.980443 | 264.014 |
| ENSGALT0000 RNA binding motif protein 5             | RBM5   | 0.987167 | 15547.5 |
| ENSGALT0000 RNA binding motif protein 6             | RBM6   | 0.966303 | 1752.53 |
| ENSGALT0000 RNA binding motif protein 7             | RBM7   | 0.607134 | 1154.5  |
| ENSGALT0000 RNA binding motif, single stranded      | RBMS1  | 0.949847 | 1091.99 |
| ENSGALT0000 RNA binding motif, single stranded      | RBMS3  | 0.942834 | 507.5   |
| ENSGALT0000 RNA binding motif protein, X-linked     | RBMX   | 0.853042 | 6334    |
| ENSGALT0000 RNA binding motif protein, X-linked     | RBMX2  | 0.896979 | 712     |
| ENSGALT0000 retinol binding protein 1, cellular     | RBP1   | 0.939579 | 4       |
| ENSGALT0000 retinol binding protein 2, cellular     | RBP2   | 0.464758 | 0       |
| ENSGALT0000 retinol binding protein 3, interstitial | RBP3   | 0.916851 | 11.5    |
| ENSGALT0000 retinol binding protein 4, plasma       | RBP4   | 0.994033 | 10.5    |
| ENSGALT0000 retinol binding protein 5, cellular     | RBP5   | 0.556241 | 1634    |
| ENSGALT0000 recombination signal binding protei     | RBPJ   | 0.948755 | 708.5   |
| ENSGALT0000 recombination signal binding protei     | RBPJL  | 0.95881  | 636.5   |
| ENSGALT0000 RNA binding protein with multiple s     | RBPM5  | 0.917059 | 542     |
| ENSGALT0000 RNA binding protein with multiple s     | RBPM52 | 0.827687 | 60.5    |
| ENSGALT0000 ring-box 1, E3 ubiquitin protein liga   | RBX1   | 0.72606  | 2207    |
| ENSGALT0000 ring finger and CCCH-type domain:       | RC3H1  | 0.98477  | 2585    |
| ENSGALT0000 ring finger and CCCH-type domain:       | RC3H2  | 0.963587 | 1239    |
| ENSGALT0000 regulator of calcineurin 1              | RCAN1  | 0.982451 | 213.5   |
| ENSGALT0000 regulator of calcineurin 2              | RCAN2  | 0.871477 | 309     |
| ENSGALT0000 RCAN family member 3                    | RCAN3  | 0.998437 | 2352.5  |
| ENSGALT0000 regulator of chromosome condensε        | RCBTB1 | 0.996914 | 3125.94 |
| ENSGALT0000 regulator of chromosome condensε        | RCBTB2 | 0.937218 | 467.059 |
| ENSGALT0000 regulator of chromosome condensε        | RCC2   | 0.946456 | 8978.22 |
| ENSGALT0000 RCC1 domain containing 1                | RCCD1  | 0.863372 | 264     |
| ENSGALT0000 ring finger and CHY zinc finger don     | RCHY1  | 0.86299  | 2778.58 |
| ENSGALT0000 RNA terminal phosphate cyclase-lik      | RCL1   | 0.866605 | 406.5   |
| ENSGALT0000 reticulocalbin 1, EF-hand calcium b     | RCN1   | 0.993062 | 1099    |
| ENSGALT0000 reticulocalbin 2, EF-hand calcium b     | RCN2   | 0.944853 | 7462    |
| ENSGALT0000 REST corepressor 1                      | RCOR1  | 0.980726 | 1083.5  |

|                                                      |        |          |         |
|------------------------------------------------------|--------|----------|---------|
| ENSGALT0000 REST corepressor 3                       | RCOR3  | 0.955553 | 2364.02 |
| ENSGALT0000 RCSD domain containing 1                 | RCSD1  | 0.829901 | 62      |
| ENSGALT0000 retinal degeneration 3                   | RD3    | 0.863124 | 58      |
| ENSGALT0000 retinol dehydrogenase 10 (all-trans)     | RDH10  | 0.928617 | 1457    |
| ENSGALT0000 retinol dehydrogenase 12 (all-trans)     | RDH12  | 0.96356  | 2408.5  |
| ENSGALT0000 retinol dehydrogenase 5 (11-cis/9-c      | RDH5   | 0.932742 | 15.5    |
| ENSGALT0000 retinol dehydrogenase 8 (all-trans)      | RDH8   | 0.970827 | 16      |
| ENSGALT0000 RAD52 motif 1                            | RDM1   | 0.889822 | 945     |
| ENSGALT0000 radixin                                  | RDX    | 0.888281 | 3468.98 |
| ENSGALT0000 reversion-inducing-cysteine-rich pro     | RECK   | 0.945389 | 484     |
| ENSGALT0000 RecQ protein-like (DNA helicase Q        | RECQL  | 0.911659 | 466     |
| ENSGALT0000 RecQ protein-like 5                      | RECQL5 | 0.950556 | 481.502 |
| ENSGALT0000 receptor accessory protein 1             | REEP1  | 0.688961 | 378     |
| ENSGALT0000 receptor accessory protein 2             | REEP2  | 0.948318 | 267.5   |
| ENSGALT0000 receptor accessory protein 3             | REEP3  | 0.986946 | 416.5   |
| ENSGALT0000 receptor accessory protein 5             | REEP5  | 0.51237  | 1337    |
| ENSGALT0000 receptor accessory protein 6             | REEP6  | 0.755155 | 134.5   |
| ENSGALT0000 regenerating islet-derived family, m     | REG4   | 0.371997 | 2       |
| ENSGALT0000 v-rel reticuloendotheliosis viral onc    | REL    | 0.90683  | 333.5   |
| ENSGALT0000 RELT-like 1                              | RELL1  | 0.949968 | 405.5   |
| ENSGALT0000 reelin                                   | RELN   | 0.848419 | 2519.5  |
| ENSGALT0000 RAS (RAD and GEM)-like GTP-bin           | REM1   | 0.903502 | 55.5    |
| ENSGALT0000 RALBP1 associated Eps domain $\alpha$    | REPS1  | 0.94177  | 930     |
| ENSGALT0000 RALBP1 associated Eps domain $\alpha$    | REPS2  | 0.996256 | 1140.5  |
| ENSGALT0000 RER1 retention in endoplasmic reti       | RER1   | 0.960211 | 1657.52 |
| ENSGALT0000 arginine-glutamic acid dipeptide (R      | RERE   | 0.983189 | 4283.5  |
| ENSGALT0000 RAS-like, estrogen-regulated, grow       | RERG   | 0.916155 | 61.5    |
| ENSGALT0000 RERG/RAS-like                            | RERGL  | 0.896307 | 144     |
| ENSGALT0000 RE1-silencing transcription factor       | REST   | 0.996176 | 2040.5  |
| ENSGALT0000 ret proto-oncogene                       | RET    | 0.947466 | 425.501 |
| ENSGALT0000 retinol saturase (all-trans-retinol 13   | RETSAT | 0.918573 | 802     |
| ENSGALT0000 REV1 homolog (S. cerevisiae)             | REV1   | 0.997458 | 726     |
| ENSGALT0000 REV3-like, catalytic subunit of DNA      | REV3L  | 0.987385 | 1814    |
| ENSGALT0000 REX1, RNA exonuclease 1 homolo           | REXO1  | 0.981836 | 2123    |
| ENSGALT0000 REX2, RNA exonuclease 2 homolo           | REXO2  | 0.684696 | 1138.53 |
| ENSGALT0000 REX4, RNA exonuclease 4 homolo           | REXO4  | 0.866289 | 225.769 |
| ENSGALT0000 replication factor C (activator 1) 1,    | RFC1   | 0.953406 | 911.748 |
| ENSGALT0000 replication factor C (activator 1) 2,    | RFC2   | 0.839102 | 1213.5  |
| ENSGALT0000 replication factor C (activator 1) 3,    | RFC3   | 0.905412 | 527.5   |
| ENSGALT0000 replication factor C (activator 1) 4,    | RFC4   | 0.805479 | 1192.01 |
| ENSGALT0000 Rieske (Fe-S) domain containing          | RFESD  | 0.853815 | 3       |
| ENSGALT0000 ring finger and FYVE-like domain c       | RFFL   | 0.994254 | 1056.5  |
| ENSGALT0000 riboflavin kinase                        | RFK    | 0.953848 | 352     |
| ENSGALT0000 RFNG O-fucosylpeptide 3-beta-N- $\alpha$ | RFNG   | 0.999904 | 1846    |
| ENSGALT0000 RFT1 homolog (S. cerevisiae)             | RFT1   | 0.972044 | 830     |
| ENSGALT0000 raftlin, lipid raft linker 1             | RFTN1  | 0.947016 | 498.5   |
| ENSGALT0000 raftlin family member 2                  | RFTN2  | 0.842848 | 347.998 |
| ENSGALT0000 ring finger and WD repeat domain ;       | RFWD2  | 0.942639 | 836     |
| ENSGALT0000 ring finger and WD repeat domain ;       | RFWD3  | 0.92817  | 666     |
| ENSGALT0000 regulatory factor X, 2 (influences H     | RFX2   | 0.982164 | 403.002 |
| ENSGALT0000 regulatory factor X, 3 (influences H     | RFX3   | 0.998456 | 576.5   |
| ENSGALT0000 regulatory factor X, 4 (influences H     | RFX4   | 0.611562 | 1       |
| ENSGALT0000 regulatory factor X, 5 (influences H     | RFX5   | 0.897206 | 568     |
| ENSGALT0000 regulatory factor X, 6                   | RFX6   | 0.35572  | 3       |
| ENSGALT0000 regulatory factor X-associated anky      | RFXANK | 0.841294 | 324.5   |
| ENSGALT0000 regulatory factor X-associated prot      | RFXAP  | 0.648868 | 410.5   |

|                                                   |         |          |         |
|---------------------------------------------------|---------|----------|---------|
| ENSGALT0000 RNA (guanine-9-) methyltransferas     | RG9MTD1 | 0.939028 | 448     |
| ENSGALT0000 RNA (guanine-9-) methyltransferas     | RG9MTD2 | 0.92961  | 279     |
| ENSGALT0000 ral guanine nucleotide dissociation   | RGL1    | 0.810508 | 2514.94 |
| ENSGALT0000 RGM domain family, member A           | RGMA    | 0.817126 | 970.5   |
| ENSGALT0000 RGM domain family, member B           | RGMB    | 0.818639 | 481     |
| ENSGALT0000 regucalcin                            | RGN     | 0.83746  | 521.001 |
| ENSGALT0000 RGP1 retrograde golgi transport hc    | RGP1    | 0.944837 | 979.5   |
| ENSGALT0000 retinal G protein coupled receptor    | RGR     | 0.156867 | 619     |
| ENSGALT0000 regulator of G-protein signaling 1    | RGS1    | 0.464758 | 0       |
| ENSGALT0000 regulator of G-protein signaling 10   | RGS10   | 0.87318  | 26      |
| ENSGALT0000 regulator of G-protein signaling 11   | RGS11   | 0.636342 | 44.5    |
| ENSGALT0000 regulator of G-protein signaling 12   | RGS12   | 0.939982 | 614.5   |
| ENSGALT0000 regulator of G-protein signaling 14   | RGS14   | 0.811242 | 597.342 |
| ENSGALT0000 regulator of G-protein signaling 16   | RGS16   | 0.927729 | 1       |
| ENSGALT0000 regulator of G-protein signaling 17   | RGS17   | 0.73805  | 63      |
| ENSGALT0000 regulator of G-protein signaling 18   | RGS18   | 0.549327 | 11.5    |
| ENSGALT0000 regulator of G-protein signaling 19   | RGS19   | 0.622414 | 72      |
| ENSGALT0000 regulator of G-protein signaling 2, 2 | RGS2    | 0.500935 | 183     |
| ENSGALT0000 regulator of G-protein signaling 20   | RGS20   | 0.762467 | 19      |
| ENSGALT0000 regulator of G-protein signaling 21   | RGS21   | ?        | 0       |
| ENSGALT0000 regulator of G-protein signaling 22   | RGS22   | 0.783262 | 1       |
| ENSGALT0000 regulator of G-protein signaling 3    | RGS3    | 0.616895 | 539.5   |
| ENSGALT0000 regulator of G-protein signaling 4    | RGS4    | 0.432553 | 21      |
| ENSGALT0000 regulator of G-protein signaling 5    | RGS5    | 0.561646 | 10.5    |
| ENSGALT0000 regulator of G-protein signaling 6    | RGS6    | 0.68751  | 28.5    |
| ENSGALT0000 regulator of G-protein signaling 7    | RGS7    | 0.741965 | 28.5    |
| ENSGALT0000 regulator of G-protein signaling 7 bi | RGS7BP  | 0.78375  | 151     |
| ENSGALT0000 regulator of G-protein signaling 8    | RGS8    | 0.739991 | 24.5    |
| ENSGALT0000 regulator of G-protein signaling 9    | RGS9    | 0.940809 | 411.5   |
| ENSGALT0000 regulator of G protein signaling 9 bi | RGS9BP  | 0.831264 | 232.5   |
| ENSGALT0000 Rh-associated glycoprotein            | RHAG    | 0.62812  | 2.5     |
| ENSGALT0000 rhomboid domain containing 1          | RHBDD1  | 0.987351 | 121.5   |
| ENSGALT0000 rhomboid domain containing 2          | RHBDD2  | 0.938731 | 291.5   |
| ENSGALT0000 rhomboid 5 homolog 1 (Drosophila      | RHBDF1  | 0.999243 | 1065.5  |
| ENSGALT0000 rhomboid 5 homolog 2 (Drosophila      | RHBDF2  | 0.928941 | 740.5   |
| ENSGALT0000 rhomboid, veinlet-like 3 (Drosophila  | RHBDL3  | 0.940331 | 9.5     |
| ENSGALT0000 Rh family, B glycoprotein             | RHBG    | 0.948185 | 258.5   |
| ENSGALT0000 Rh blood group, CcEe antigens         | RHCE    | 0.993871 | 259.156 |
| ENSGALT0000 Rh family, C glycoprotein             | RHCG    | 0.348765 | 0.5     |
| ENSGALT0000 Rh blood group, D antigen             | RHD     | 0.973287 | 162.845 |
| ENSGALT0000 Ras homolog enriched in brain         | RHEB    | 0.902805 | 874     |
| ENSGALT0000 rhodopsin                             | RHO     | 0.864672 | 43      |
| ENSGALT0000 ras homolog gene family, member       | RHOA    | 0.907177 | 15011   |
| ENSGALT0000 ras homolog gene family, member       | RHOB    | 0.790842 | 3062    |
| ENSGALT0000 Rho-related BTB domain containin      | RHOBTB1 | 0.934834 | 837     |
| ENSGALT0000 Rho-related BTB domain containin      | RHOBTB2 | 0.959449 | 3586    |
| ENSGALT0000 Rho-related BTB domain containin      | RHOBTB3 | 0.775008 | 29.5    |
| ENSGALT0000 ras homolog gene family, member       | RHOC    | 0.963997 | 263     |
| ENSGALT0000 ras homolog gene family, member       | RHOF    | 0.947211 | 162.5   |
| ENSGALT0000 ras homolog gene family, member       | RHOG    | 0.965687 | 874     |
| ENSGALT0000 ras homolog gene family, member       | RHOH    | 0.462785 | 10.5    |
| ENSGALT0000 ras homolog gene family, member       | RHOJ    | 0.860016 | 315.5   |
| ENSGALT0000 ras homolog gene family, member       | RHOQ    | 0.981178 | 366.5   |
| ENSGALT0000 ras homolog gene family, member       | RHOT1   | 0.974343 | 1114    |
| ENSGALT0000 ras homolog gene family, member       | RHOT2   | 0.89516  | 1022.99 |
| ENSGALT0000 ras homolog gene family, member       | RHOV    | 0.84918  | 142     |

|                                                   |            |          |         |
|---------------------------------------------------|------------|----------|---------|
| ENSGALT0000 raphilin, Rho GTPase binding prot     | RHPN1      | 0.965171 | 977.5   |
| ENSGALT0000 raphilin, Rho GTPase binding prot     | RHPN2      | 0.913457 | 841     |
| ENSGALT0000 RIB43A domain with coiled-coils 2     | RIBC2      | 0.788762 | 44.5    |
| ENSGALT0000 resistance to inhibitors of cholinest | RIC3       | 0.771826 | 217     |
| ENSGALT0000 resistance to inhibitors of cholinest | RIC8A      | 0.958007 | 2913.5  |
| ENSGALT0000 resistance to inhibitors of cholinest | RIC8B      | 0.887519 | 809.5   |
| ENSGALT0000 RPTOR independent companion of        | RICTOR     | 0.99185  | 1151    |
| ENSGALT0000 RAP1 interacting factor homolog (y    | RIF1       | 0.9702   | 3253.12 |
| ENSGALT0000 Rab interacting lysosomal protein     | RILP       | 0.514491 | 125.5   |
| ENSGALT0000 Rab interacting lysosomal protein-li  | RILPL1     | 0.913936 | 1080    |
| ENSGALT0000 Rab interacting lysosomal protein-li  | RILPL2     | 0.734424 | 1451.5  |
| ENSGALT0000 RIMS binding protein 2                | RIMBP2     | 0.982775 | 358.001 |
| ENSGALT0000 ribosomal modification protein rimK   | RIMKLB     | 0.886134 | 630.5   |
| ENSGALT0000 regulating synaptic membrane exo      | RIMS1      | 0.985775 | 1045.5  |
| ENSGALT0000 regulating synaptic membrane exo      | RIMS2      | 0.784871 | 226.5   |
| ENSGALT0000 regulating synaptic membrane exo      | RIMS3      | 0.785111 | 82      |
| ENSGALT0000 regulating synaptic membrane exo      | RIMS4      | 0.999278 | 422.5   |
| ENSGALT0000 Ras and Rab interactor 2              | RIN2       | 0.962926 | 918.5   |
| ENSGALT0000 Ras and Rab interactor 3              | RIN3       | 0.820012 | 78.5    |
| ENSGALT0000 RAD50 interactor 1                    | RINT1      | 0.891544 | 630     |
| ENSGALT0000 RIO kinase 1 (yeast)                  | RIOK1      | 0.913243 | 726.612 |
| ENSGALT0000 RIO kinase 2 (yeast)                  | RIOK2      | 0.937179 | 785     |
| ENSGALT0000 RIO kinase 3 (yeast)                  | RIOK3      | 0.991401 | 778     |
| ENSGALT0000 receptor (TNFRSF)-interacting seri    | RIPK1      | 0.984652 | 600     |
| ENSGALT0000 receptor-interacting serine-threonin  | RIPK2      | 0.952242 | 206.5   |
| ENSGALT0000 receptor-interacting serine-threonin  | RIPK4      | 0.998556 | 454.5   |
| ENSGALT0000 ripply2 homolog (zebrafish)           | RIPPLY2    | 0.338137 | 45.5    |
| ENSGALT0000 Ras-like without CAAX 1               | RIT1       | 0.948289 | 3124    |
| ENSGALT0000 Ras-like without CAAX 2               | RIT2       | 0.92736  | 27.5    |
| ENSGALT0000 retinaldehyde binding protein 1       | RLBP1      | 0.670063 | 1261    |
| ENSGALT0000 rearranged L-myc fusion               | RLF        | 0.999589 | 1500.5  |
| ENSGALT0000 ring finger protein, LIM domain inte  | RLIM       | 0.954254 | 1834    |
| ENSGALT0000 relaxin 3                             | RLN3       | 0.923467 | 12.5    |
| ENSGALT0000 RGD motif, leucine rich repeats, trc  | RLTPR      | 0.82004  | 2       |
| ENSGALT0000 RMI1, RecQ mediated genome ins        | RMI1       | 0.960607 | 333     |
| ENSGALT0000 RMI2, RecQ mediated genome ins        | RMI2       | 0.425526 | 469.5   |
| ENSGALT0000 required for meiotic nuclear divisor  | RMND1      | 0.982452 | 658     |
| ENSGALT0000 required for meiotic nuclear divisor  | RMND5A     | 0.949158 | 1175.49 |
| ENSGALT0000 RNase MRP                             | RNase_MRP  | 0.565879 | 8       |
| ENSGALT0000 ribonuclease H1                       | RNASEH1    | 0.845033 | 763     |
| ENSGALT0000 ribonuclease H2, subunit B            | RNASEH2B   | 0.544846 | 1000.71 |
| ENSGALT0000 ribonuclease L                        | RNASEL     | 0.976803 | 313.501 |
| ENSGALT0000 Nuclear RNase P                       | RNaseP_nuc | 0.614524 | 44.5    |
| ENSGALT0000 ribonuclease T2                       | RNASET2    | 0.987353 | 816.503 |
| ENSGALT0000 Rho family GTPase 2                   | RND2       | 0.780809 | 82.5984 |
| ENSGALT0000 Rho family GTPase 3                   | RND3       | 0.646959 | 351.402 |
| ENSGALT0000 ring finger protein 10                | RNF10      | 0.944476 | 4740.5  |
| ENSGALT0000 ring finger protein 103               | RNF103     | 0.894911 | 850.5   |
| ENSGALT0000 ring finger protein 11                | RNF11      | 0.925691 | 2079.5  |
| ENSGALT0000 ring finger protein 111               | RNF111     | 0.986208 | 1679.53 |
| ENSGALT0000 ring finger protein 113A              | RNF113A    | 0.746866 | 605     |
| ENSGALT0000 ring finger protein 114               | RNF114     | 0.93472  | 1171.5  |
| ENSGALT0000 ring finger protein 121               | RNF121     | 0.921297 | 1057    |
| ENSGALT0000 ring finger protein 122               | RNF122     | 0.134312 | 489     |
| ENSGALT0000 ring finger protein 123               | RNF123     | 0.877742 | 2613.66 |
| ENSGALT0000 ring finger protein 126               | RNF126     | 0.786836 | 1064.5  |

|                                                 |         |          |         |
|-------------------------------------------------|---------|----------|---------|
| ENSGALT0000 ring finger protein 128             | RNF128  | 0.862185 | 653.5   |
| ENSGALT0000 ring finger protein 13              | RNF13   | 0.974831 | 2276.55 |
| ENSGALT0000 ring finger protein 130             | RNF130  | 0.845714 | 2528.5  |
| ENSGALT0000 ring finger protein 138             | RNF138  | 0.993266 | 282.999 |
| ENSGALT0000 ring finger protein 14              | RNF14   | 0.957396 | 1150.49 |
| ENSGALT0000 ring finger protein 141             | RNF141  | 0.975228 | 2199    |
| ENSGALT0000 ring finger protein 144A            | RNF144A | 0.905796 | 339.5   |
| ENSGALT0000 ring finger protein 144B            | RNF144B | 0.822857 | 60      |
| ENSGALT0000 ring finger protein 145             | RNF145  | 0.975158 | 2391.97 |
| ENSGALT0000 ring finger protein 149             | RNF149  | 0.858254 | 926.5   |
| ENSGALT0000 ring finger protein 150             | RNF150  | 0.887774 | 1774.01 |
| ENSGALT0000 ring finger protein 151             | RNF151  | 0.852364 | 399.5   |
| ENSGALT0000 ring finger protein 152             | RNF152  | 0.728885 | 67.5    |
| ENSGALT0000 ring finger protein 157             | RNF157  | 0.657931 | 701.074 |
| ENSGALT0000 ring finger protein 165             | RNF165  | 0.966598 | 646     |
| ENSGALT0000 ring finger protein 166             | RNF166  | 0.980325 | 3763.03 |
| ENSGALT0000 ring finger protein 168             | RNF168  | 0.968747 | 487.5   |
| ENSGALT0000 ring finger protein 169             | RNF169  | 0.979146 | 326     |
| ENSGALT0000 ring finger protein 17              | RNF17   | 0.768245 | 3.5     |
| ENSGALT0000 ring finger protein 170             | RNF170  | 0.971211 | 215.5   |
| ENSGALT0000 ring finger protein 180             | RNF180  | 0.99689  | 96      |
| ENSGALT0000 ring finger protein 182             | RNF182  | 0.995968 | 150     |
| ENSGALT0000 ring finger protein 185             | RNF185  | 0.928051 | 1712.5  |
| ENSGALT0000 ring finger protein 19A             | RNF19A  | 0.960698 | 1354    |
| ENSGALT0000 ring finger protein 19B             | RNF19B  | 0.500528 | 787     |
| ENSGALT0000 ring finger protein 2               | RNF2    | 0.879349 | 553     |
| ENSGALT0000 ring finger protein 20              | RNF20   | 0.932673 | 3546.5  |
| ENSGALT0000 ring finger protein 207             | RNF207  | 0.967434 | 865.497 |
| ENSGALT0000 ring finger protein 208             | RNF208  | 0.916823 | 491.5   |
| ENSGALT0000 ring finger protein 212             | RNF212  | 0.649519 | 0.5     |
| ENSGALT0000 ring finger protein 213             | RNF213  | 0.939577 | 136.5   |
| ENSGALT0000 ring finger protein 214             | RNF214  | 0.957772 | 1206    |
| ENSGALT0000 ring finger protein 215             | RNF215  | 0.815432 | 1710.5  |
| ENSGALT0000 ring finger protein 216             | RNF216  | 0.946966 | 1018.5  |
| ENSGALT0000 ring finger protein 217             | RNF217  | 0.998703 | 318     |
| ENSGALT0000 ring finger protein 219             | RNF219  | 0.947719 | 724     |
| ENSGALT0000 ring finger protein 220             | RNF220  | 0.939075 | 1202.5  |
| ENSGALT0000 ring finger protein 222             | RNF222  | 0.464758 | 0       |
| ENSGALT0000 ring finger protein 223             | RNF223  | 0.649519 | 0       |
| ENSGALT0000 ring finger protein 25              | RNF25   | 0.888925 | 909.498 |
| ENSGALT0000 ring finger protein 26              | RNF26   | 0.940316 | 1166    |
| ENSGALT0000 ring finger protein 32              | RNF32   | 0.734344 | 2.5     |
| ENSGALT0000 ring finger protein 34              | RNF34   | 0.900597 | 1561    |
| ENSGALT0000 ring finger protein 38              | RNF38   | 0.979717 | 1085.5  |
| ENSGALT0000 ring finger protein 4               | RNF4    | 0.962995 | 2591.97 |
| ENSGALT0000 ring finger protein 41              | RNF41   | 0.865408 | 1441    |
| ENSGALT0000 ring finger protein 43              | RNF43   | 0.989647 | 125     |
| ENSGALT0000 ring finger protein (C3H2C3 type) 6 | RNF6    | 0.975676 | 783     |
| ENSGALT0000 ring finger protein 7               | RNF7    | 0.841029 | 1768.5  |
| ENSGALT0000 ring finger protein, transmembrane  | RNFT1   | 0.990693 | 666.5   |
| ENSGALT0000 ring finger protein, transmembrane  | RNFT2   | 0.986213 | 607     |
| ENSGALT0000 RNA guanylyltransferase and 5'-ph   | RNGTT   | 0.957338 | 616     |
| ENSGALT0000 ribonuclease/angiogenin inhibitor 1 | RNH1    | 0.782356 | 3636    |
| ENSGALT0000 renalase, FAD-dependent amine o     | RNLS    | 0.959246 | 178.5   |
| ENSGALT0000 RNA (guanine-7-) methyltransferas   | RNMT    | 0.982898 | 1795    |
| ENSGALT0000 RNA methyltransferase like 1        | RNMTL1  | 0.647476 | 462     |



|                                                       |          |         |
|-------------------------------------------------------|----------|---------|
| ENSGALT0000 RNA-binding region (RNP1, RRM) RNPC3      | 0.995134 | 635     |
| ENSGALT0000 arginyl aminopeptidase (aminopept RNPEP   | 0.796121 | 2225.5  |
| ENSGALT0000 arginyl aminopeptidase (aminopept RNPEPL1 | 0.901128 | 365     |
| ENSGALT0000 RNA binding protein S1, serine-rich RNPS1 | 0.667484 | 2240.5  |
| ENSGALT0000 roundabout, axon guidance receptc ROBO1   | 0.948519 | 3121.43 |
| ENSGALT0000 roundabout, axon guidance receptc ROBO2   | 0.982896 | 1155.51 |
| ENSGALT0000 roundabout, axon guidance receptc ROBO3   | 0.753772 | 7       |
| ENSGALT0000 roundabout, axon guidance receptc ROBO4   | 0.857827 | 43.5    |
| ENSGALT0000 Rho-associated, coiled-coil contain ROCK1 | 0.981428 | 985.005 |
| ENSGALT0000 Rho-associated, coiled-coil contain ROCK2 | 0.969335 | 909     |
| ENSGALT0000 rogdli homolog (Drosophila) ROGDI         | 0.852344 | 804     |
| ENSGALT0000 reactive oxygen species modulator ROMO1   | 0.266229 | 3711.5  |
| ENSGALT0000 ropporin 1-like ROPN1L                    | 0.829525 | 118.5   |
| ENSGALT0000 receptor tyrosine kinase-like orphar ROR1 | 0.9575   | 4074    |
| ENSGALT0000 receptor tyrosine kinase-like orphar ROR2 | 0.945824 | 1006.5  |
| ENSGALT0000 RAR-related orphan receptor A RORA        | 0.991239 | 89.5    |
| ENSGALT0000 RAR-related orphan receptor B RORB        | 0.796305 | 288.499 |
| ENSGALT0000 c-ros oncogene 1 , receptor tyrosin ROS1  | 0.694339 | 836.507 |
| ENSGALT0000 retinitis pigmentosa 1 (autosomal d RP1   | 1        | 0.5     |
| ENSGALT0000 retinitis pigmentosa 1-like 1 RP1L1       | ?        | 0       |
| ENSGALT0000 retinitis pigmentosa 2 (X-linked rec RP2  | 0.974966 | 1544.5  |
| ENSGALT0000 retinitis pigmentosa 9 (autosomal d RP9   | 0.912082 | 134     |
| ENSGALT0000 replication protein A1, 70kDa RPA1        | 0.880144 | 2394    |
| ENSGALT0000 replication protein A2, 32kDa RPA2        | 0.613797 | 2066.5  |
| ENSGALT0000 replication protein A3, 14kDa RPA3        | 0.381237 | 474.5   |
| ENSGALT0000 RPA interacting protein RPAIN             | 0.814278 | 345     |
| ENSGALT0000 RNA polymerase II associated prot RPAP1   | 0.97621  | 1506.03 |
| ENSGALT0000 RNA polymerase II associated prot RPAP2   | 0.960504 | 318     |
| ENSGALT0000 RNA polymerase II associated prot RPAP3   | 0.967227 | 615     |
| ENSGALT0000 ribulose-5-phosphate-3-epimerase RPE      | 0.584205 | 2658.5  |
| ENSGALT0000 retinal pigment epithelium-specific RPE65 | 0.986775 | 62      |
| ENSGALT0000 ribosome production factor 1 homo RPF1    | 0.928315 | 659     |
| ENSGALT0000 ribosome production factor 2 homo RPF2    | 0.961178 | 847     |
| ENSGALT0000 retinitis pigmentosa GTPase regula RPGR   | 0.989583 | 196     |
| ENSGALT0000 RPGRIP1-like RPGRIP1L                     | 0.968935 | 360     |
| ENSGALT0000 rabphilin 3A homolog (mouse) RPH3A        | 0.72438  | 15      |
| ENSGALT0000 ribose 5-phosphate isomerase A RPIA       | 0.876263 | 1181.5  |
| ENSGALT0000 ribosomal protein L10a RPL10A             | 0.726264 | 31935   |
| ENSGALT0000 ribosomal protein L11 RPL11               | 0.822329 | 18753.3 |
| ENSGALT0000 ribosomal protein L12 RPL12               | 0.454563 | 18336.5 |
| ENSGALT0000 ribosomal protein L13 RPL13               | 0.634482 | 38652   |
| ENSGALT0000 ribosomal protein L14 RPL14               | 0.603822 | 20858.7 |
| ENSGALT0000 ribosomal protein 17-like RPL17L          | 0.85151  | 41687.2 |
| ENSGALT0000 ribosomal protein L18a RPL18A             | 0.801611 | 30747.8 |
| ENSGALT0000 ribosomal protein L19 RPL19               | 0.682079 | 31658.4 |
| ENSGALT0000 ribosomal protein L21 RPL21               | 0.741919 | 18922   |
| ENSGALT0000 ribosomal protein L22 RPL22               | 0.541671 | 13419.3 |
| ENSGALT0000 ribosomal protein L22-like 1 RPL22L1      | 0.878074 | 3904    |
| ENSGALT0000 ribosomal protein L23 RPL23               | 0.325601 | 31877   |
| ENSGALT0000 ribosomal protein L23a RPL23A             | 0.701242 | 23061   |
| ENSGALT0000 ribosomal protein L24 RPL24               | 0.797198 | 15944   |
| ENSGALT0000 ribosomal protein L26-like 1 RPL26L1      | 0.835597 | 40205.2 |
| ENSGALT0000 ribosomal protein L27 RPL27               | 0.224198 | 26528.6 |
| ENSGALT0000 ribosomal protein L27a RPL27A             | 0.783949 | 20794.5 |
| ENSGALT0000 ribosomal protein L29 RPL29               | 0.631238 | 13241   |
| ENSGALT0000 ribosomal protein L30 RPL30               | 0.84795  | 16523.5 |

|                                                 |          |          |         |
|-------------------------------------------------|----------|----------|---------|
| ENSGALT0000 ribosomal protein L31               | RPL31    | 0.464529 | 23836   |
| ENSGALT0000 ribosomal protein L35               | RPL35    | 0.413887 | 27373.8 |
| ENSGALT0000 ribosomal protein L35a              | RPL35A   | 0.490977 | 26652.5 |
| ENSGALT0000 60S ribosomal protein L36           | RPL36    | 0.836601 | 9931.04 |
| ENSGALT0000 ribosomal protein L37               | RPL37    | 0.768299 | 32242.5 |
| ENSGALT0000 ribosomal protein L37a              | RPL37A   | 0.472779 | 26809.2 |
| ENSGALT0000 ribosomal protein L38               | RPL38    | 0.396641 | 16550.5 |
| ENSGALT0000 ribosomal protein L39               | RPL39    | 0.964952 | 19326.6 |
| ENSGALT0000 ribosomal protein L3-like           | RPL3L    | 0.964359 | 6.00008 |
| ENSGALT0000 ribosomal protein L4                | RPL4     | 0.889218 | 58657.7 |
| ENSGALT0000 ribosomal protein L5                | RPL5     | 0.895901 | 38261.9 |
| ENSGALT0000 ribosomal protein L6                | RPL6     | 0.783009 | 27112.4 |
| ENSGALT0000 ribosomal protein L7                | RPL7     | 0.945347 | 34933   |
| ENSGALT0000 ribosomal protein L7a               | RPL7A    | 0.847206 | 50112.3 |
| ENSGALT0000 ribosomal protein L7-like 1         | RPL7L1   | 0.877577 | 3447    |
| ENSGALT0000 ribosomal protein L8                | RPL8     | 0.849108 | 72739   |
| ENSGALT0000 ribosomal protein L9                | RPL9     | 0.915681 | 21386.3 |
| ENSGALT0000 ribosomal protein, large, P0        | RPLP0    | 0.486549 | 54895.5 |
| ENSGALT0000 ribosomal protein, large, P1        | RPLP1    | 0.365667 | 49010.5 |
| ENSGALT0000 ribosomal protein, large, P2        | RPLP2    | 0.672738 | 11647   |
| ENSGALT0000 ribophorin I                        | RPN1     | 0.983376 | 11496   |
| ENSGALT0000 ribophorin II                       | RPN2     | 0.925958 | 7382.13 |
| ENSGALT0000 ribonuclease P/MRP 14kDa subuni     | RPP14    | 0.940758 | 199.5   |
| ENSGALT0000 ribonuclease P/MRP 25kDa subuni     | RPP25    | 0.677914 | 7.5     |
| ENSGALT0000 ribonuclease P/MRP 30kDa subuni     | RPP30    | 0.905284 | 452.5   |
| ENSGALT0000 ribonuclease P/MRP 38kDa subuni     | RPP38    | 0.973614 | 277     |
| ENSGALT0000 ribonuclease P/MRP 40kDa subuni     | RPP40    | 0.905333 | 377     |
| ENSGALT0000 regulation of nuclear pre-mRNA do   | RPRD1A   | 0.965351 | 942.503 |
| ENSGALT0000 regulation of nuclear pre-mRNA do   | RPRD1B   | 0.965531 | 3586.5  |
| ENSGALT0000 reprimo-like                        | RPRML    | 0.408084 | 5.23853 |
| ENSGALT0000 ribosomal protein S10               | RPS10    | 0.468924 | 42061   |
| ENSGALT0000 ribosomal protein S12               | RPS12    | 0.650288 | 47448   |
| ENSGALT0000 ribosomal protein S13               | RPS13    | 0.625928 | 12686.7 |
| ENSGALT0000 ribosomal protein S14               | RPS14    | 0.848684 | 40325.2 |
| ENSGALT0000 ribosomal protein S15               | RPS15    | 0.706852 | 36443.9 |
| ENSGALT0000 ribosomal protein S15a              | RPS15A   | 0.90842  | 32388   |
| ENSGALT0000 ribosomal protein S16               | RPS16    | 0.777735 | 26893   |
| ENSGALT0000 ribosomal protein S17-like          | RPS17L   | 0.572149 | 21954.9 |
| ENSGALT0000 ribosomal protein S19 binding prote | RPS19BP1 | 0.738633 | 1224    |
| ENSGALT0000 ribosomal protein S2                | RPS2     | 0.547494 | 49171.5 |
| ENSGALT0000 ribosomal protein S20               | RPS20    | 0.792328 | 19680   |
| ENSGALT0000 ribosomal protein S21               | RPS21    | 0.817662 | 9756.5  |
| ENSGALT0000 ribosomal protein S24               | RPS24    | 0.857798 | 24269   |
| ENSGALT0000 ribosomal protein S25               | RPS25    | 0.644418 | 21314   |
| ENSGALT0000 ribosomal protein S27a              | RPS27A   | 0.383649 | 31123.2 |
| ENSGALT0000 ribosomal protein S28               | RPS28    | 0.397174 | 26826.9 |
| ENSGALT0000 ribosomal protein S29               | RPS29    | 0.489417 | 32026   |
| ENSGALT0000 ribosomal protein S3                | RPS3     | 0.627249 | 46499.1 |
| ENSGALT0000 ribosomal protein S3A               | RPS3A    | 0.688477 | 50998.5 |
| ENSGALT0000 ribosomal protein S4, X-linked      | RPS4X    | 0.724727 | 53311.4 |
| ENSGALT0000 ribosomal protein S6                | RPS6     | 0.558681 | 64952.5 |
| ENSGALT0000 ribosomal protein S6 kinase, 90kDε  | RPS6KA2  | 0.770633 | 178     |
| ENSGALT0000 ribosomal protein S6 kinase, 90kDε  | RPS6KA3  | 0.9218   | 1063    |
| ENSGALT0000 ribosomal protein S6 kinase, 90kDε  | RPS6KA5  | 0.964839 | 464     |
| ENSGALT0000 ribosomal protein S6 kinase, 90kDε  | RPS6KA6  | 0.982278 | 521     |
| ENSGALT0000 ribosomal protein S6 kinase, 70kDε  | RPS6KB1  | 0.972057 | 980     |

|                                                      |            |           |         |
|------------------------------------------------------|------------|-----------|---------|
| ENSGALT0000 ribosomal protein S6 kinase, 70kDα       | RPS6KB2    | 0.903557  | 793.5   |
| ENSGALT0000 ribosomal protein S6 kinase, 52kDα       | RPS6KC1    | 0.910408  | 1267    |
| ENSGALT0000 ribosomal protein S6 kinase-like 1       | RPS6KL1    | 0.822424  | 1020    |
| ENSGALT0000 ribosomal protein S7                     | RPS7       | 0.919269  | 19189   |
| ENSGALT0000 ribosomal protein S8                     | RPS8       | 0.807337  | 61296.5 |
| ENSGALT0000 ribosomal protein SA                     | RPSA       | 0.796474  | 61320.4 |
| ENSGALT0000 regulatory associated protein of MTRPTOR |            | 0.940395  | 1492.5  |
| ENSGALT0000 RNA pseudouridylate synthase don         | RPUSD1     | 0.925521  | 248.464 |
| ENSGALT0000 RNA pseudouridylate synthase don         | RPUSD4     | 0.887431  | 622     |
| ENSGALT0000 RCD1 required for cell differentiat      | RQCD1      | 0.937519  | 5295.38 |
| ENSGALT0000 Ras-related associated with diabet       | RRAD       | 0.647766  | 27.5    |
| ENSGALT0000 Ras-related GTP binding B                | RRAGB      | 0.974228  | 1959.01 |
| ENSGALT0000 Ras-related GTP binding C                | RRAGC      | 0.949905  | 1377.5  |
| ENSGALT0000 Ras-related GTP binding D                | RRAGD      | 0.927981  | 421     |
| ENSGALT0000 related RAS viral (r-ras) oncogene       | RRAS2      | 0.888847  | 2179.5  |
| ENSGALT0000 ribosome binding protein 1 homolo        | RRBP1      | 0.987194  | 1462.5  |
| ENSGALT0000 ras responsive element binding pro       | RREB1      | 0.99484   | 1853.96 |
| ENSGALT0000 retinal pigment epithelium-derived       | RRH        | 0.693395  | 4.5     |
| ENSGALT0000 ribonucleotide reductase M1              | RRM1       | 0.954355  | 8729    |
| ENSGALT0000 ribonucleotide reductase M2              | RRM2       | 0.840073  | 2367.5  |
| ENSGALT0000 ribonucleotide reductase M2 B (TP        | RRM2B      | 0.995921  | 650     |
| ENSGALT0000 RRN3 RNA polymerase I transcript         | RRN3       | 0.932974  | 665     |
| ENSGALT0000 ribosomal RNA adenine dimethylas         | RRNAD1     | 0.759138  | 157     |
| ENSGALT0000 ribosomal RNA processing 12 hom          | RRP12      | 0.935712  | 4391    |
| ENSGALT0000 ribosomal RNA processing 15 hom          | RRP15      | 0.738756  | 384.5   |
| ENSGALT0000 ribosomal RNA processing 1 homol         | RRP1B      | 0.957188  | 1403.49 |
| ENSGALT0000 ribosomal RNA processing 7 homol         | RRP7A      | 0.718309  | 901.5   |
| ENSGALT0000 ribosomal RNA processing 9, small        | RRP9       | 0.895299  | 1568.5  |
| ENSGALT0000 retinoschisin 1                          | RS1        | 0.401219  | 2       |
| ENSGALT0000 radical S-adenosyl methionine dom        | RSAD2      | 0.853815  | 1       |
| ENSGALT0000 round spermatid basic protein 1          | RSBN1      | 0.987477  | 728.5   |
| ENSGALT0000 round spermatid basic protein 1-lik      | RSBN1L     | 0.981077  | 646     |
| ENSGALT0000 leukocyte ribonuclease A-2               | RSFR       | 0.280743  | 14.1389 |
| ENSGALT0000 Angiogenin                               | RSFR_CHICK | 0.0657539 | 1.85995 |
| ENSGALT0000 ribosomal L1 domain containing 1         | RSL1D1     | 0.985596  | 1046.5  |
| ENSGALT0000 ribosomal L24 domain containing 1        | RSL24D1    | 0.843261  | 834.5   |
| ENSGALT0000 radial spoke head 1 homolog (Ch1a        | RSPH1      | 0.949907  | 15.5    |
| ENSGALT0000 radial spoke 3 homolog (Chlamydo         | RSPH3      | 0.990577  | 191     |
| ENSGALT0000 radial spoke head 4 homolog A (Ch        | RSPH4A     | 0.894723  | 138     |
| ENSGALT0000 radial spoke head 9 homolog (Ch1a        | RSPH9      | 0.873589  | 235.5   |
| ENSGALT0000 R-spondin 1                              | RSPO1      | 0.647768  | 18.5    |
| ENSGALT0000 R-spondin 2                              | RSPO2      | 0.967364  | 133     |
| ENSGALT0000 R-spondin 3                              | RSPO3      | 0.754249  | 391.001 |
| ENSGALT0000 R-spondin 4                              | RSPO4      | 0.811579  | 8       |
| ENSGALT0000 ring finger and SPRY domain conta        | RSPRY1     | 0.989794  | 1141    |
| ENSGALT0000 arginine/serine-rich coiled-coil 1       | RSRC1      | 0.90905   | 747     |
| ENSGALT0000 arginine/serine-rich coiled-coil 2       | RSRC2      | 0.928026  | 1828    |
| ENSGALT0000 Ras suppressor protein 1                 | RSU1       | 0.92232   | 1132.5  |
| ENSGALT0000 retbindin                                | RTBDN      | 0.970763  | 12.5    |
| ENSGALT0000 RNA terminal phosphate cyclase dα        | RTCD1      | 0.937396  | 1204.5  |
| ENSGALT0000 rhabdoid tumor deletion region gen       | RTDR1      | 0.979626  | 50.0892 |
| ENSGALT0000 regulator of telomere elongation he      | RTKL1      | 0.984445  | 491.501 |
| ENSGALT0000 Rtf1, Paf1/RNA polymerase II com         | RTF1       | 0.946823  | 2791.52 |
| ENSGALT0000 rhotekin 2                               | RTKN2      | 0.961696  | 269     |
| ENSGALT0000 reticulon 1                              | RTN1       | 0.427423  | 4975.54 |
| ENSGALT0000 reticulon 4                              | RTN4       | 0.811666  | 8253    |

|                                                     |         |          |         |
|-----------------------------------------------------|---------|----------|---------|
| ENSGALT0000 reticulon 4 interacting protein 1       | RTN4IP1 | 0.88325  | 639     |
| ENSGALT0000 reticulon 4 receptor                    | RTN4R   | 0.963803 | 169.5   |
| ENSGALT0000 reticulon 4 receptor-like 1             | RTN4RL1 | 0.925945 | 2.5     |
| ENSGALT0000 reticulon 4 receptor-like 2             | RTN4RL2 | 0.415836 | 332     |
| ENSGALT0000 rotatin                                 | RTTN    | 0.95905  | 299     |
| ENSGALT0000 RUN and FYVE domain containing          | RUFY1   | 0.971642 | 984.599 |
| ENSGALT0000 RUN and FYVE domain containing          | RUFY2   | 0.848327 | 256.5   |
| ENSGALT0000 RUN and FYVE domain containing          | RUFY3   | 0.744184 | 1458.5  |
| ENSGALT0000 RUN domain containing 1                 | RUNDC1  | 0.866495 | 807.5   |
| ENSGALT0000 RUN domain containing 3B                | RUNDC3B | 0.853009 | 422     |
| ENSGALT0000 runt-related transcription factor 1     | RUNX1   | 0.740631 | 213     |
| ENSGALT0000 runt-related transcription factor 1; tr | RUNX1T1 | 0.728257 | 296     |
| ENSGALT0000 runt-related transcription factor 2     | RUNX2   | 0.731229 | 43      |
| ENSGALT0000 runt-related transcription factor 3     | RUNX3   | 0.747554 | 10      |
| ENSGALT0000 RUN and SH3 domain containing 1         | RUSC1   | 0.828463 | 707.5   |
| ENSGALT0000 RUN and SH3 domain containing 2         | RUSC2   | 0.685578 | 1208.5  |
| ENSGALT0000 RuvB-like 1 (E. coli)                   | RUVBL1  | 0.877871 | 2134    |
| ENSGALT0000 RWD domain containing 1                 | RWDD1   | 0.952257 | 809     |
| ENSGALT0000 RWD domain containing 2A                | RWDD2A  | 0.911383 | 134     |
| ENSGALT0000 RWD domain containing 2B                | RWDD2B  | 0.943746 | 275.366 |
| ENSGALT0000 RWD domain containing 3                 | RWDD3   | 0.989652 | 199     |
| ENSGALT0000 RWD domain containing 4                 | RWDD4   | 0.904583 | 512.5   |
| ENSGALT0000 relaxin/insulin-like family peptide re  | RXFP1   | 0.766247 | 48.5    |
| ENSGALT0000 relaxin/insulin-like family peptide re  | RXFP2   | 0.8606   | 13      |
| ENSGALT0000 relaxin/insulin-like family peptide re  | RXFP3   | 0.940515 | 32      |
| ENSGALT0000 retinoid X receptor, gamma              | RXRG    | 0.449592 | 385.218 |
| ENSGALT0000 RING1 and YY1 binding protein           | RYBP    | 0.962176 | 352.5   |
| ENSGALT0000 RYK receptor-like tyrosine kinase       | RYK     | 0.997218 | 1930.5  |
| ENSGALT0000 ryanodine receptor 2 (cardiac)          | RYR2    | 0.822313 | 302     |
| ENSGALT0000 ryanodine receptor 3                    | RYR3    | 0.987108 | 62.9999 |
| ENSGALT0000 S100 calcium binding protein A11        | S100A11 | 0.489846 | 4588.5  |
| ENSGALT0000 S100 calcium binding protein A13        | S100A13 | 0.698164 | 145.5   |
| ENSGALT0000 S100 calcium-binding protein A6         | S100A6  | 0.409318 | 1981.5  |
| ENSGALT0000 S100 calcium binding protein B          | S100B   | 0.80348  | 24      |
| ENSGALT0000 S100 calcium binding protein Z          | S100Z   | ?        | 0       |
| ENSGALT0000 sphingosine-1-phosphate receptor        | S1PR3   | 0.8902   | 91.5    |
| ENSGALT0000 sphingosine-1-phosphate receptor        | S1PR4   | 0.597407 | 9       |
| ENSGALT0000 serum amyloid A-like 1                  | SAAL1   | 0.980312 | 457     |
| ENSGALT0000 SAC1 suppressor of actin mutation       | SACM1L  | 0.948855 | 608     |
| ENSGALT0000 spastic ataxia of Charlevoix-Sague      | SACS    | 0.82555  | 2035.5  |
| ENSGALT0000 S-antigen; retina and pineal gland (    | SAG     | 0.922589 | 12.5    |
| ENSGALT0000 sal-like 1 (Drosophila)                 | SALL1   | 0.959803 | 6604.55 |
| ENSGALT0000 sal-like 3 (Drosophila)                 | SALL3   | 0.956936 | 6515    |
| ENSGALT0000 sal-like 4 (Drosophila)                 | SALL4   | 0.987164 | 1431.02 |
| ENSGALT0000 sterile alpha motif domain containir    | SAMD10  | 0.618124 | 15      |
| ENSGALT0000 sterile alpha motif domain containir    | SAMD11  | 0.768586 | 1862.02 |
| ENSGALT0000 sterile alpha motif domain containir    | SAMD12  | 0.984406 | 172.5   |
| ENSGALT0000 sterile alpha motif domain containir    | SAMD13  | 0.996792 | 285     |
| ENSGALT0000 sterile alpha motif domain containir    | SAMD15  | 0.988215 | 42.5    |
| ENSGALT0000 sterile alpha motif domain containir    | SAMD3   | 0.499585 | 1       |
| ENSGALT0000 sterile alpha motif domain containir    | SAMD4A  | 0.911273 | 1125    |
| ENSGALT0000 sterile alpha motif domain containir    | SAMD5   | 0.629714 | 1.5     |
| ENSGALT0000 sterile alpha motif domain containir    | SAMD7   | 0.861016 | 5       |
| ENSGALT0000 sterile alpha motif domain containir    | SAMD8   | 0.871712 | 197.5   |
| ENSGALT0000 SAM domain and HD domain 1              | SAMHD1  | 0.962841 | 656.5   |
| ENSGALT0000 sorting and assembly machinery cc       | SAMM50  | 0.849655 | 2075.5  |

|                                                        |          |          |         |
|--------------------------------------------------------|----------|----------|---------|
| ENSGALT0000 SAM domain, SH3 domain and nuc             | SAMSN1   | 0.623366 | 9       |
| ENSGALT0000 Sin3A-associated protein, 130kDa           | SAP130   | 0.949548 | 4125.91 |
| ENSGALT0000 Sin3A-associated protein, 18kDa            | SAP18    | 0.283785 | 6907.5  |
| ENSGALT0000 Sin3A-associated protein, 30kDa            | SAP30    | 0.934993 | 345     |
| ENSGALT0000 SAP30 binding protein                      | SAP30BP  | 0.793509 | 734.5   |
| ENSGALT0000 SAP30-like                                 | SAP30L   | 0.969377 | 435.5   |
| ENSGALT0000 SAR1 homolog A ( <i>S. cerevisiae</i> )    | SAR1A    | 0.830105 | 4695.5  |
| ENSGALT0000 SAR1 homolog B ( <i>S. cerevisiae</i> )    | SAR1B    | 0.907061 | 897.497 |
| ENSGALT0000 sarcosine dehydrogenase                    | SARDH    | 0.971661 | 1177    |
| ENSGALT0000 sterile alpha and TIR motif containi       | SARM1    | 0.745158 | 463.5   |
| ENSGALT0000 hypothetical protein LOC425058             | SARNP    | 0.932014 | 2813.59 |
| ENSGALT0000 squamous cell carcinoma antigen r          | SART3    | 0.921638 | 2073.99 |
| ENSGALT0000 SAM and SH3 domain containing 1            | SASH1    | 0.95438  | 1147    |
| ENSGALT0000 SAM and SH3 domain containing 3            | SASH3    | 0.702633 | 11      |
| ENSGALT0000 spindle assembly 6 homolog ( <i>C. elk</i> | SASS6    | 0.946233 | 667     |
| ENSGALT0000 spermidine/spermine N1-acetyltran          | SAT1     | 0.870438 | 1618.5  |
| ENSGALT0000 SATB homeobox 1                            | SATB1    | 0.988865 | 769.5   |
| ENSGALT0000 SATB homeobox 2                            | SATB2    | 0.999298 | 43      |
| ENSGALT0000 salvador homolog 1 ( <i>Drosophila</i> )   | SAV1     | 0.939729 | 2428    |
| ENSGALT0000 SAYSVFN motif domain containing            | SAYSD1   | 0.749425 | 925     |
| ENSGALT0000 Shwachman-Bodian-Diamond sync              | SBDS     | 0.960809 | 1283.5  |
| ENSGALT0000 SET binding factor 1                       | SBF1     | 0.953585 | 7875.5  |
| ENSGALT0000 SET binding factor 2                       | SBF2     | 0.959771 | 1142    |
| ENSGALT0000 SH3-binding domain kinase 1                | SBK1     | 0.716679 | 607     |
| ENSGALT0000 SH3-binding domain kinase family,          | SBK2     | 0.853815 | 0.5     |
| ENSGALT0000 strawberry notch homolog 1 ( <i>Drosc</i>  | SBNO1    | 0.968347 | 2300.5  |
| ENSGALT0000 strawberry notch homolog 2 ( <i>Drosc</i>  | SBNO2    | 0.998417 | 1064    |
| ENSGALT0000 sterol-C4-methyl oxidase-like              | SC4MOL   | 0.810258 | 1064    |
| ENSGALT0000 SR-related CTD-associated factor           | SCAF11   | 0.9762   | 1572.5  |
| ENSGALT0000 SR-related CTD-associated factor           | SCAF4    | 0.936009 | 1374.02 |
| ENSGALT0000 SR-related CTD-associated factor           | SCAF8    | 0.969885 | 1292.5  |
| ENSGALT0000 suppressor of cancer cell invasion         | SCAI     | 0.960187 | 494.5   |
| ENSGALT0000 secretory carrier membrane protei          | SCAMP1   | 0.959112 | 1031    |
| ENSGALT0000 secretory carrier membrane protei          | SCAMP2   | 0.937001 | 2094.5  |
| ENSGALT0000 secretory carrier membrane protei          | SCAMP4   | 0.924511 | 641.5   |
| ENSGALT0000 secretory carrier membrane protei          | SCAMP5   | 0.809241 | 1415.5  |
| ENSGALT0000 SREBF chaperone                            | SCAP     | 0.906052 | 4635.03 |
| ENSGALT0000 S-phase cyclin A-associated protei         | SCAPER   | 0.893912 | 4393    |
| ENSGALT0000 scavenger receptor class A, memb           | SCARA5   | 0.173104 | 26      |
| ENSGALT0000 scavenger receptor class B, memb           | SCARB1   | 0.730071 | 300     |
| ENSGALT0000 scavenger receptor class B, memb           | SCARB2   | 0.95603  | 1307.5  |
| ENSGALT0000 scavenger receptor class F, memb           | SCARF1   | 0.814952 | 175     |
| ENSGALT0000 scavenger receptor class F, memb           | SCARF2   | 0.916584 | 710     |
| ENSGALT0000 Small Cajal body specific RNA 1            | SCARNA1  | 0.649519 | 0.5     |
| ENSGALT0000 Small Cajal body specific RNA 11           | SCARNA11 | 0.749832 | 2.5     |
| ENSGALT0000 Small Cajal body specific RNA 13           | SCARNA13 | 0.912085 | 32      |
| ENSGALT0000 Small Cajal body specific RNA 14           | SCARNA14 | 0.479357 | 1.5     |
| ENSGALT0000 Small Cajal body specific RNA 15           | SCARNA15 | 0.70003  | 5       |
| ENSGALT0000 Small Cajal body specific RNA 16           | SCARNA16 | 0.649519 | 4       |
| ENSGALT0000 Small Cajal body specific RNA 20           | SCARNA20 | 0.760726 | 0.5     |
| ENSGALT0000 Small Cajal body specific RNA 23           | SCARNA23 | 0.995591 | 5.5     |
| ENSGALT0000 Small Cajal body specific RNA 24           | SCARNA24 | ?        | 0       |
| ENSGALT0000 Small Cajal body specific RNA 3            | SCARNA3  | 0.580649 | 1       |
| ENSGALT0000 Small Cajal body specific RNA 4            | SCARNA4  | 0.475693 | 2.5     |
| ENSGALT0000 Small Cajal body specific RNA 6            | SCARNA6  | 0.994111 | 43      |
| ENSGALT0000 Small Cajal body specific RNA 8            | SCARNA8  | 0.965446 | 6.5     |

|             |                                               |         |          |         |
|-------------|-----------------------------------------------|---------|----------|---------|
| ENSGALT0000 | saccharopine dehydrogenase (putative)         | SCCPDH  | 0.912951 | 3768.5  |
| ENSGALT0000 | stearoyl-CoA desaturase (delta-9-delta)       | SCD     | 0.760846 | 322     |
| ENSGALT0000 | stearoyl-CoA desaturase 5                     | SCD5    | 0.882324 | 6263.5  |
| ENSGALT0000 | sec1 family domain containing 1               | SCFD1   | 0.983547 | 1079    |
| ENSGALT0000 | secretogranin II                              | SCG2    | 0.768066 | 363.5   |
| ENSGALT0000 | secretogranin III                             | SCG3    | 0.652506 | 2590.5  |
| ENSGALT0000 | secretogranin V (7B2 protein)                 | SCG5    | 0.394517 | 563     |
| ENSGALT0000 | secretoglobulin, family 1C, member 1          | SCGB1C1 | ?        | 0       |
| ENSGALT0000 | secretagogin, EF-hand calcium binding         | SCGN    | 0.4572   | 27      |
| ENSGALT0000 | schwannomin interacting protein 1             | SCHIP1  | 0.584929 | 1008    |
| ENSGALT0000 | scinderin                                     | SCIN    | 0.919543 | 287     |
| ENSGALT0000 | sodium channel and clathrin linker            | SCLT1   | 0.999806 | 380.207 |
| ENSGALT0000 | selenocysteine lyase                          | SCLY    | 0.886726 | 789.5   |
| ENSGALT0000 | sex comb on midleg homolog 1 (Drosophila)     | SCMH1   | 0.832468 | 735.5   |
| ENSGALT0000 | sex comb on midleg-like 2 (Drosophila)        | SCML2   | 0.992674 | 462.5   |
| ENSGALT0000 | sex comb on midleg-like 4 (Drosophila)        | SCML4   | 0.946372 | 13      |
| ENSGALT0000 | sodium channel, voltage-gated, type 1A        | SCN1A   | 0.84343  | 169.097 |
| ENSGALT0000 | sodium channel, voltage-gated, type 2A        | SCN2A   | 0.823576 | 356.218 |
| ENSGALT0000 | sodium channel, voltage-gated, type 2B        | SCN2B   | 0.994016 | 95.5    |
| ENSGALT0000 | sodium channel, voltage-gated, type 3B        | SCN3B   | 0.73039  | 664     |
| ENSGALT0000 | sodium channel, voltage-gated, type 4B        | SCN4B   | 0.976678 | 436     |
| ENSGALT0000 | sodium channel, voltage-gated, type 5A        | SCN5A   | 0.730049 | 31.1537 |
| ENSGALT0000 | sodium channel, voltage-gated, type 8A        | SCN8A   | 0.908437 | 412.5   |
| ENSGALT0000 | sodium channel, nonvoltage-gated              | SCNN1A  | 0.907534 | 1225    |
| ENSGALT0000 | sodium channel, nonvoltage-gated              | SCNN1B  | 0.986518 | 1482.5  |
| ENSGALT0000 | sodium channel, nonvoltage-gated              | SCNN1D  | 0.853815 | 0.5     |
| ENSGALT0000 | sodium channel, nonvoltage-gated              | SCNN1G  | 0.949515 | 392.5   |
| ENSGALT0000 | SCO cytochrome oxidase deficient              | SCO1    | 0.876895 | 293.499 |
| ENSGALT0000 | SCO cytochrome oxidase deficient              | SCO2    | 0.671991 | 385     |
| ENSGALT0000 | short coiled-coil protein                     | SCOC    | 0.990203 | 310     |
| ENSGALT0000 | serine carboxypeptidase 1                     | SCPEP1  | 0.971223 | 1683    |
| ENSGALT0000 | stimulator of chondrogenesis 1                | SCRG1   | 0.846485 | 6       |
| ENSGALT0000 | scribbled homolog (Drosophila)                | SCRIB   | 0.980885 | 4145.04 |
| ENSGALT0000 | secernin 1                                    | SCRN1   | 0.93202  | 1667.02 |
| ENSGALT0000 | secernin 2                                    | SCRN2   | 0.933948 | 486     |
| ENSGALT0000 | secernin 3                                    | SCRN3   | 0.826346 | 384.486 |
| ENSGALT0000 | secretin                                      | SCT     | ?        | 0       |
| ENSGALT0000 | secretin receptor                             | SCTR    | 0.643623 | 0.5     |
| ENSGALT0000 | signal peptide, CUB domain, EGF-like          | SCUBE1  | 0.964038 | 1428.5  |
| ENSGALT0000 | signal peptide, CUB domain, EGF-like          | SCUBE2  | 0.973103 | 901.5   |
| ENSGALT0000 | signal peptide, CUB domain, EGF-like          | SCUBE3  | 0.994392 | 458     |
| ENSGALT0000 | SCY1-like 2 (S. cerevisiae)                   | SCYL2   | 0.959956 | 1049.5  |
| ENSGALT0000 | SCY1-like 3 (S. cerevisiae)                   | SCYL3   | 0.949157 | 1316.7  |
| ENSGALT0000 | SDA1 domain containing 1                      | SDAD1   | 0.884425 | 684     |
| ENSGALT0000 | syndecan 1                                    | SDC1    | 0.996486 | 951.5   |
| ENSGALT0000 | syndecan 2                                    | SDC2    | 0.898252 | 1600.48 |
| ENSGALT0000 | syndecan 3                                    | SDC3    | 0.934599 | 1681    |
| ENSGALT0000 | syndecan 4                                    | SDC4    | 0.865632 | 1118    |
| ENSGALT0000 | syntenin                                      | SDCBP   | 0.970027 | 5860    |
| ENSGALT0000 | serologically defined colon cancer associated | SDCCAG3 | 0.729075 | 255.5   |
| ENSGALT0000 | serologically defined colon cancer associated | SDCCAG8 | 0.974644 | 365.5   |
| ENSGALT0000 | stromal cell-derived factor 2                 | SDF2    | 0.192739 | 1596.5  |
| ENSGALT0000 | stromal cell-derived factor 2-like 1          | SDF2L1  | 0.948416 | 1984    |
| ENSGALT0000 | stromal cell derived factor 4                 | SDF4    | 0.99843  | 1914.5  |
| ENSGALT0000 | succinate dehydrogenase complex               | SDHA    | 0.839965 | 2439.04 |
| ENSGALT0000 | succinate dehydrogenase complex               | SDHB    | 0.749572 | 1726.5  |

|                                                                            |          |         |
|----------------------------------------------------------------------------|----------|---------|
| ENSGALT0000 succinate dehydrogenase complex SDHD                           | 0.240986 | 3820    |
| ENSGALT0000 sidekick homolog 1, cell adhesion r SDK1                       | 0.874473 | 4300    |
| ENSGALT0000 sidekick homolog 2 (chicken) SDK2                              | 0.998613 | 6833.83 |
| ENSGALT0000 serum deprivation response (phosph SDPR                        | 0.989251 | 534.5   |
| ENSGALT0000 short chain dehydrogenase/reductase SDR16C5                    | 0.990636 | 311.5   |
| ENSGALT0000 short chain dehydrogenase/reductase SDR42E2                    | 0.766524 | 52.5    |
| ENSGALT0000 serine dehydratase-like SDSL                                   | 0.901223 | 4       |
| ENSGALT0000 SEC11 homolog A ( <i>S. cerevisiae</i> ) SEC11A                | 0.604119 | 2727.01 |
| ENSGALT0000 SEC11 homolog C ( <i>S. cerevisiae</i> ) SEC11C                | 0.725712 | 235.5   |
| ENSGALT0000 SEC13 homolog ( <i>S. cerevisiae</i> ) SEC13                   | 0.787802 | 4317    |
| ENSGALT0000 SEC14-like 1 ( <i>S. cerevisiae</i> ) SEC14L1                  | 0.832146 | 1411.5  |
| ENSGALT0000 SEC14-like 2 ( <i>S. cerevisiae</i> ) SEC14L2                  | 0.950877 | 1416.5  |
| ENSGALT0000 SEC14-like 5 ( <i>S. cerevisiae</i> ) SEC14L5                  | 0.749877 | 281     |
| ENSGALT0000 SEC16 homolog A ( <i>S. cerevisiae</i> ) SEC16A                | 0.984213 | 5016    |
| ENSGALT0000 SEC16 homolog B ( <i>S. cerevisiae</i> ) SEC16B                | 0.985385 | 92      |
| ENSGALT0000 SEC22 vesicle trafficking protein homolog SEC22A               | 0.940743 | 1111.5  |
| ENSGALT0000 Vesicle-trafficking protein SEC22b SEC22B                      | 0.570925 | 599.832 |
| ENSGALT0000 SEC22 vesicle trafficking protein homolog SEC22C               | 0.985793 | 409.5   |
| ENSGALT0000 Sec23 homolog A ( <i>S. cerevisiae</i> ) SEC23A                | 0.947232 | 2123    |
| ENSGALT0000 Sec23 homolog B ( <i>S. cerevisiae</i> ) SEC23B                | 0.946193 | 3770    |
| ENSGALT0000 SEC23 interacting protein SEC23IP                              | 0.955635 | 1558.5  |
| ENSGALT0000 SEC24 family, member A ( <i>S. cerevisiae</i> ) SEC24A         | 0.962868 | 2487.35 |
| ENSGALT0000 SEC24 family, member B ( <i>S. cerevisiae</i> ) SEC24B         | 0.968499 | 1249.35 |
| ENSGALT0000 SEC24 family, member C ( <i>S. cerevisiae</i> ) SEC24C         | 0.975812 | 5144    |
| ENSGALT0000 SEC24 family, member D ( <i>S. cerevisiae</i> ) SEC24D         | 0.916833 | 945.5   |
| ENSGALT0000 SEC31 homolog A ( <i>S. cerevisiae</i> ) SEC31A                | 0.915598 | 8917    |
| ENSGALT0000 SEC31 homolog B ( <i>S. cerevisiae</i> ) SEC31B                | 0.957495 | 2201.97 |
| ENSGALT0000 Sec61 alpha 1 subunit ( <i>S. cerevisiae</i> ) SEC61A1         | 0.960416 | 4113.5  |
| ENSGALT0000 Sec61 beta subunit SEC61B                                      | 0.273813 | 1596.5  |
| ENSGALT0000 Sec61 gamma subunit SEC61G                                     | 0.846079 | 898.5   |
| ENSGALT0000 SEC62 homolog ( <i>S. cerevisiae</i> ) SEC62                   | 0.97363  | 2174    |
| ENSGALT0000 SEC63 homolog ( <i>S. cerevisiae</i> ) SEC63                   | 0.962467 | 2903    |
| ENSGALT0000 SECIS binding protein 2 SECISBP2                               | 0.990768 | 707.5   |
| ENSGALT0000 SECIS binding protein 2-like SECISBP2L                         | 0.959559 | 1007    |
| ENSGALT0000 SEH1-like ( <i>S. cerevisiae</i> ) SEH1L                       | 0.805112 | 911     |
| ENSGALT0000 sel-1 suppressor of lin-12-like ( <i>C. elegans</i> ) SEL1L    | 0.980002 | 1508.5  |
| ENSGALT0000 sel-1 suppressor of lin-12-like 3 ( <i>C. elegans</i> ) SEL1L3 | 0.976983 | 869     |
| ENSGALT0000 selectin E (endothelial adhesion molecule) SELE                | 0.641669 | 2       |
| ENSGALT0000 selenium binding protein 1 SELENBP1                            | 0.796941 | 444     |
| ENSGALT0000 selenoprotein K SELK                                           | 0.729243 | 1382    |
| ENSGALT0000 selenoprotein O SELO                                           | 0.928873 | 122.5   |
| ENSGALT0000 selectin P (granule membrane protein) SELP                     | 0.914567 | 9       |
| ENSGALT0000 Sel1 repeat containing 1 SELRC1                                | 0.727989 | 654.003 |
| ENSGALT0000 selenoprotein S SELS                                           | 0.84418  | 1513.5  |
| ENSGALT0000 selenoprotein T SELT                                           | 0.907989 | 1900    |
| ENSGALT0000 sema domain, immunoglobulin domain SEMA3A                      | 0.994952 | 2964    |
| ENSGALT0000 sema domain, immunoglobulin domain SEMA3C                      | 0.85577  | 1201.01 |
| ENSGALT0000 sema domain, immunoglobulin domain SEMA3D                      | 0.975767 | 946.5   |
| ENSGALT0000 sema domain, immunoglobulin domain SEMA3E                      | 0.868792 | 30      |
| ENSGALT0000 sema domain, immunoglobulin domain SEMA3G                      | 0.892145 | 1012.5  |
| ENSGALT0000 sema domain, immunoglobulin domain SEMA4B                      | 0.846799 | 1311.5  |
| ENSGALT0000 sema domain, immunoglobulin domain SEMA4D                      | 0.959176 | 823.003 |
| ENSGALT0000 sema domain, seven thrombospondin SEMA5A                       | 0.975233 | 4131.5  |
| ENSGALT0000 sema domain, seven thrombospondin SEMA5B                       | 0.981109 | 4503.5  |
| ENSGALT0000 sema domain, transmembrane domain SEMA6A                       | 0.838561 | 940     |
| ENSGALT0000 sema domain, transmembrane domain SEMA6B                       | 0.828354 | 2393    |

|                                                    |            |          |         |
|----------------------------------------------------|------------|----------|---------|
| ENSGALT0000 sema domain, transmembrane dor         | SEMA6D     | 0.885387 | 1087    |
| ENSGALT0000 semaphorin 7A, GPI membrane an         | SEMA7A     | 0.854963 | 802.5   |
| ENSGALT0000 SUMO1/sentrin specific peptidase       | SENP1      | 0.956067 | 679.5   |
| ENSGALT0000 SUMO1/sentrin/SMT3 specific pepi       | SENP2      | 0.964077 | 393.499 |
| ENSGALT0000 SUMO1/sentrin specific peptidase       | SENP5      | 0.946038 | 904     |
| ENSGALT0000 SUMO1/sentrin specific peptidase       | SENP6      | 0.979672 | 2222.52 |
| ENSGALT0000 SUMO1/sentrin specific peptidase       | SENP7      | 0.970478 | 324.5   |
| ENSGALT0000 septin 5                               | Sep-05     | 0.862315 | 4173.48 |
| ENSGALT0000 15 kDa selenoprotein                   | SEP15      | 0.948259 | 2857    |
| ENSGALT0000 selenophosphate synthetase 1           | SEPHS1     | 0.880706 | 1763    |
| ENSGALT0000 selenoprotein N, 1                     | SEPN1      | 0.989274 | 1633.98 |
| ENSGALT0000 selenoprotein P, plasma, 1             | SEPP1      | 0.919993 | 1219.01 |
| ENSGALT0000 Sep (O-phosphoserine) tRNA:Sec         | SEPSECS    | 0.948294 | 809.5   |
| ENSGALT0000 septin 10                              | SEPT10     | 0.99118  | 251.5   |
| ENSGALT0000 septin 11                              | SEPT11     | 0.908495 | 1890.23 |
| ENSGALT0000 septin 12                              | SEPT12     | 0.958066 | 1193.5  |
| ENSGALT0000 septin 2                               | SEPT2      | 0.885721 | 7569.49 |
| ENSGALT0000 septin 3                               | SEPT3      | 0.594028 | 494     |
| ENSGALT0000 septin 6                               | SEPT6      | 0.8654   | 2930.26 |
| ENSGALT0000 septin 7                               | SEPT7      | 0.94854  | 4446    |
| ENSGALT0000 septin 8                               | SEPT8      | 0.887662 | 693.752 |
| ENSGALT0000 septin 9                               | SEPT9      | 0.793881 | 8290.81 |
| ENSGALT0000 selenoprotein X, 1                     | SEPX1      | 0.647629 | 374.5   |
| ENSGALT0000 serine active site containing 1        | SERAC1     | 0.99193  | 211.5   |
| ENSGALT0000 SERPINE1 mRNA binding protein          | SERBP1     | 0.906465 | 7736.85 |
| ENSGALT0000 small EDRK-rich factor 1A (telomer     | SERF1A     | 0.620052 | 4019    |
| ENSGALT0000 small EDRK-rich factor 2               | SERF2      | 0.368638 | 1152    |
| ENSGALT0000 secretion regulating guanine nucle     | SERGEF     | 0.914155 | 216.5   |
| ENSGALT0000 serine hydrolase-like 2                | SERHL2     | 0.9781   | 849     |
| ENSGALT0000 serine incorporator 1                  | SERINC1    | 0.75245  | 12617.5 |
| ENSGALT0000 serine incorporator 2                  | SERINC2    | 0.990411 | 427.5   |
| ENSGALT0000 serine incorporator 3                  | SERINC3    | 0.759474 | 1013.5  |
| ENSGALT0000 serine incorporator 4                  | SERINC4    | 0.990829 | 101     |
| ENSGALT0000 serine incorporator 5                  | SERINC5    | 0.927237 | 323.5   |
| ENSGALT0000 serpin peptidase inhibitor, clade A (  | SERPINA1   | 0.464758 | 0       |
| ENSGALT0000 serpin peptidase inhibitor, clade A (  | SERPINA10  | ?        | 0       |
| ENSGALT0000 serpin peptidase inhibitor, clade A (  | SERPINA3   | 0.532919 | 31.5    |
| ENSGALT0000 serpin peptidase inhibitor, clade A (  | SERPINA4   | 0.464758 | 0.5     |
| ENSGALT0000 serpin peptidase inhibitor, clade A (  | SERPINA5   | ?        | 0       |
| ENSGALT0000 serpin peptidase inhibitor, clade A (  | SERPINA9   | 0.603682 | 1       |
| ENSGALT0000 serpin peptidase inhibitor, clade B (  | SERPINB1   | 0.539038 | 0       |
| ENSGALT0000 serpin peptidase inhibitor, clade B (  | SERPINB10  | 0.553949 | 1       |
| ENSGALT0000 serpin peptidase inhibitor, clade B (  | SERPINB12  | 0.386686 | 1.5     |
| ENSGALT0000 ovalbumin                              | SERPINB14  | 0.895318 | 3       |
| ENSGALT0000 serpin peptidase inhibitor, clade B (  | SERPINB14B | 0        | 0       |
| ENSGALT0000 serpin peptidase inhibitor, clade B (  | SERPINB2   | 0.542485 | 0       |
| ENSGALT0000 serpin peptidase inhibitor, clade B (  | SERPINB5   | 0.70003  | 4       |
| ENSGALT0000 serpin peptidase inhibitor, clade B (  | SERPINB6   | 0.921129 | 736.5   |
| ENSGALT0000 serpin peptidase inhibitor, clade B (  | SERPINBP1  | 0.853815 | 1       |
| ENSGALT0000 serpin peptidase inhibitor, clade D (  | SERPIND1   | 0.940794 | 6       |
| ENSGALT0000 serpin peptidase inhibitor, clade E (  | SERPINE2   | 0.906401 | 1160    |
| ENSGALT0000 serpin peptidase inhibitor, clade F (  | SERPINF1   | 0.995279 | 492     |
| ENSGALT0000 serpin peptidase inhibitor, clade F (  | SERPINF2   | 0.666798 | 76      |
| ENSGALT0000 serpin peptidase inhibitor, clade G (  | SERPING1   | 0.984374 | 781     |
| ENSGALT0000 serpin peptidase inhibitor, clade H (  | SERPINH1   | 0.989042 | 20535.5 |
| ENSGALT0000 serpin peptidase inhibitor, clade I (r | SERPINI1   | 0.869902 | 2284    |



|                                                        |         |          |         |
|--------------------------------------------------------|---------|----------|---------|
| ENSGALT0000 SERTA domain containing 2                  | SERTAD2 | 0.960613 | 894     |
| ENSGALT0000 SERTA domain containing 4                  | SERTAD4 | 0.968118 | 715     |
| ENSGALT0000 serine-rich and transmembrane domain       | SERTM1  | 0.725737 | 34      |
| ENSGALT0000 sestrin 1                                  | SESN1   | 0.938787 | 1595.5  |
| ENSGALT0000 sestrin 2                                  | SESN2   | 0.952092 | 792     |
| ENSGALT0000 sestrin 3                                  | SESN3   | 0.971511 | 983.5   |
| ENSGALT0000 SEC14 and spectrin domains 1               | SESTD1  | 0.876117 | 2146.5  |
| ENSGALT0000 SET nuclear oncogene                       | SET     | 0.950296 | 6746.5  |
| ENSGALT0000 SET binding protein 1                      | SETBP1  | 0.979551 | 1833    |
| ENSGALT0000 SET domain containing 1B                   | SETD1B  | 0.997359 | 1797.5  |
| ENSGALT0000 SET domain containing 2                    | SETD2   | 0.975292 | 7682    |
| ENSGALT0000 SET domain containing 3                    | SETD3   | 0.969495 | 895.01  |
| ENSGALT0000 SET domain containing 4                    | SETD4   | 0.993995 | 111     |
| ENSGALT0000 SET domain containing 5                    | SETD5   | 0.999112 | 3446    |
| ENSGALT0000 SET domain containing 6                    | SETD6   | 0.931661 | 393.5   |
| ENSGALT0000 SET domain containing (lysine methylation) | SETD7   | 0.775733 | 1252    |
| ENSGALT0000 SET domain containing (lysine methylation) | SETD8   | 0.907442 | 171.5   |
| ENSGALT0000 SET domain, bifurcated 2                   | SETDB2  | 0.981295 | 811.01  |
| ENSGALT0000 senataxin                                  | SETX    | 0.966759 | 1505    |
| ENSGALT0000 seizure related 6 homolog (mouse)          | SEZ6L   | 0.763282 | 119.5   |
| ENSGALT0000 splicing factor 3a, subunit 1, 120kDa      | SF3A1   | 0.935369 | 5814    |
| ENSGALT0000 splicing factor 3a, subunit 2, 66kDa       | SF3A2   | 0.799496 | 1029    |
| ENSGALT0000 splicing factor 3a, subunit 3, 60kDa       | SF3A3   | 0.874086 | 2090    |
| ENSGALT0000 splicing factor 3b, subunit 1, 155kDa      | SF3B1   | 0.97607  | 11417   |
| ENSGALT0000 splicing factor 3B, 14 kDa subunit         | SF3B14  | 0.606595 | 1587    |
| ENSGALT0000 splicing factor 3b, subunit 3, 130kDa      | SF3B3   | 0.950227 | 9702.34 |
| ENSGALT0000 splicing factor 3b, subunit 4, 49kDa       | SF3B4   | 0.840553 | 4750.5  |
| ENSGALT0000 splicing factor 3b, subunit 5, 10kDa       | SF3B5   | 0.374658 | 1872.5  |
| ENSGALT0000 Sfi1 homolog, spindle assembly factor      | SFI1    | 0.999118 | 794.5   |
| ENSGALT0000 Scm-like with four mbt domains 1           | SFMBT1  | 0.934731 | 153.5   |
| ENSGALT0000 Scm-like with four mbt domains 2           | SFMBT2  | 0.90709  | 90      |
| ENSGALT0000 splicing factor proline/glutamine-rich     | SFPQ    | 0.935133 | 11676.2 |
| ENSGALT0000 secreted frizzled-related protein 1        | SFRP1   | 0.993207 | 11404.5 |
| ENSGALT0000 secreted frizzled-related protein 2        | SFRP2   | 0.790597 | 2971    |
| ENSGALT0000 secreted frizzled-related protein 4        | SFRP4   | 0.621968 | 33.0338 |
| ENSGALT0000 secreted frizzled-related protein 5        | SFRP5   | 0.670536 | 20.5    |
| ENSGALT0000 splicing factor, suppressor of white-eyes  | SFSWAP  | 0.997421 | 2516    |
| ENSGALT0000 SFT2 domain containing 1                   | SFT2D1  | 0.80575  | 652.5   |
| ENSGALT0000 SFT2 domain containing 2                   | SFT2D2  | 0.975554 | 678     |
| ENSGALT0000 surfactant, pulmonary-associated protein   | SFTPA1  | 0.729711 | 1       |
| ENSGALT0000 sideroflexin 1                             | SFXN1   | 0.848274 | 886.929 |
| ENSGALT0000 sideroflexin 2                             | SFXN2   | 0.855436 | 1039.5  |
| ENSGALT0000 sideroflexin 3                             | SFXN3   | 0.83252  | 1468.5  |
| ENSGALT0000 sideroflexin 4                             | SFXN4   | 0.945517 | 465.5   |
| ENSGALT0000 sideroflexin 5                             | SFXN5   | 0.931343 | 358.5   |
| ENSGALT0000 sarcoglycan, beta (43kDa dystrophin)       | SGCB    | 0.886783 | 1084.5  |
| ENSGALT0000 sarcoglycan, delta (35kDa dystrophin)      | SGCD    | 0.914357 | 163     |
| ENSGALT0000 sarcoglycan, epsilon                       | SGCE    | 0.944018 | 998.5   |
| ENSGALT0000 sarcoglycan, gamma (35kDa dystrophin)      | SGCG    | 0.991282 | 189     |
| ENSGALT0000 sarcoglycan, zeta                          | SGCZ    | 0.951338 | 19.5    |
| ENSGALT0000 SH3-domain GRB2-like (endophilin)          | SGIP1   | 0.74926  | 203.5   |
| ENSGALT0000 serum/glucocorticoid regulated kinase      | SGK1    | 0.969188 | 1241.5  |
| ENSGALT0000 protein kinase-like protein                | SgK196  | 0.96441  | 982.553 |
| ENSGALT0000 serum/glucocorticoid regulated kinase      | SGK2    | ?        | 0       |
| ENSGALT0000 homolog of rat prisma of Rnd2              | SGK223  | 0.837355 | 256     |
| ENSGALT0000 serum/glucocorticoid regulated kinase      | SGK3    | 0.997065 | 870.002 |

|                                                             |          |           |         |
|-------------------------------------------------------------|----------|-----------|---------|
| ENSGALT0000 transmembrane protein 23                        | SGMS1    | 0.997876  | 397.001 |
| ENSGALT0000 sphingomyelin synthase 2                        | SGMS2    | 0.865372  | 214.56  |
| ENSGALT0000 shugoshin-like 1 (S. pombe)                     | SGOL1    | 0.924522  | 273     |
| ENSGALT0000 shugoshin-like 2 (S. pombe)                     | SGOL2    | 0.957426  | 69      |
| ENSGALT0000 sphingosine-1-phosphate lyase 1                 | SGPL1    | 0.899301  | 3598    |
| ENSGALT0000 sphingosine-1-phosphate phosphatase 1           | SGPP1    | 0.979831  | 94.5    |
| ENSGALT0000 sphingosine-1-phosphate phosphatase 2           | SGPP2    | 0.99162   | 260.5   |
| ENSGALT0000 N-sulfoglucosamine sulfohydrolase               | SGSH     | 0.947015  | 317.807 |
| ENSGALT0000 small G protein signaling modulator 1           | SGSM1    | 0.888384  | 347     |
| ENSGALT0000 small G protein signaling modulator 2           | SGSM2    | 0.973762  | 381.5   |
| ENSGALT0000 small G protein signaling modulator 3           | SGSM3    | 0.985161  | 702.5   |
| ENSGALT0000 small glutamine-rich tetratricopeptide repeat 1 | SGTA     | 0.937     | 2942.5  |
| ENSGALT0000 small glutamine-rich tetratricopeptide repeat 2 | SGTB     | 0.862219  | 544     |
| ENSGALT0000 SH2B adaptor protein 2                          | SH2B2    | 0.958698  | 556     |
| ENSGALT0000 SH2B adaptor protein 3                          | SH2B3    | 0.911963  | 81.5    |
| ENSGALT0000 SH2 domain containing 1A                        | SH2D1A   | 0.0539949 | 0       |
| ENSGALT0000 SH2 domain containing 2A                        | SH2D2A   | 0.603682  | 0       |
| ENSGALT0000 SH2 domain containing 3C                        | SH2D3C   | 0.600051  | 707.5   |
| ENSGALT0000 SH2 domain containing 4A                        | SH2D4A   | 0.8552    | 26.5    |
| ENSGALT0000 SH2 domain containing 4B                        | SH2D4B   | 0.663461  | 35.5    |
| ENSGALT0000 SH3 domain binding glutamic acid-rich protein 1 | SH3BGR   | 0.438628  | 4       |
| ENSGALT0000 SH3 domain binding glutamic acid-rich protein 2 | SH3BGR1  | 0.950786  | 7486    |
| ENSGALT0000 SH3 domain binding glutamic acid-rich protein 3 | SH3BGR2  | 0.844706  | 541.5   |
| ENSGALT0000 SH3 domain binding glutamic acid-rich protein 4 | SH3BGR3  | 0.790502  | 2605.5  |
| ENSGALT0000 SH3-domain binding protein 1                    | SH3BP1   | 0.492441  | 3.5     |
| ENSGALT0000 SH3-domain binding protein 2                    | SH3BP2   | 0.861937  | 153.5   |
| ENSGALT0000 SH3-domain binding protein 4                    | SH3BP4   | 0.93085   | 2077.5  |
| ENSGALT0000 SH3-domain binding protein 5 (BTBD10)           | SH3BP5   | 0.921839  | 971.483 |
| ENSGALT0000 SH3 domain containing 19                        | SH3D19   | 0.976243  | 520.5   |
| ENSGALT0000 SH3-domain GRB2-like 1                          | SH3GL1   | 0.946347  | 3107.01 |
| ENSGALT0000 SH3-domain GRB2-like 2                          | SH3GL2   | 0.877036  | 82.5    |
| ENSGALT0000 SH3-domain GRB2-like 3                          | SH3GL3   | 0.880457  | 132     |
| ENSGALT0000 SH3-domain GRB2-like endophilin 1               | SH3GLB1  | 0.929843  | 2025.5  |
| ENSGALT0000 SH3-domain GRB2-like endophilin 2               | SH3GLB2  | 0.923748  | 1099.5  |
| ENSGALT0000 SH3-domain kinase binding protein 1             | SH3KBP1  | 0.925094  | 1170    |
| ENSGALT0000 SH3 and PX domains 2B                           | SH3PXD2B | 0.833426  | 1038    |
| ENSGALT0000 SH3 domain containing ring finger 1             | SH3RF1   | 0.998804  | 1421.5  |
| ENSGALT0000 SH3 domain containing ring finger 2             | SH3RF2   | 0.875315  | 30.5    |
| ENSGALT0000 SH3 domain containing ring finger 3             | SH3RF3   | 0.656897  | 194     |
| ENSGALT0000 SH3 domain and tetratricopeptide repeat 1       | SH3TC1   | 0.983122  | 91.9999 |
| ENSGALT0000 SH3 domain and tetratricopeptide repeat 2       | SH3TC2   | 0.888929  | 124.4   |
| ENSGALT0000 SH3 domain containing, Ysc84-like               | SH3YL1   | 0.997063  | 304     |
| ENSGALT0000 SH3 and multiple ankyrin repeat domain 2        | SHANK2   | 0.874909  | 169     |
| ENSGALT0000 SH3 and multiple ankyrin repeat domain 3        | SHANK3   | 0.848452  | 83      |
| ENSGALT0000 SHANK-associated RH domain interacting protein  | SHARPIN  | 0.905261  | 483     |
| ENSGALT0000 SHC (Src homology 2 domain containing) 1        | SHC1     | 0.960257  | 452     |
| ENSGALT0000 SHC (Src homology 2 domain containing) 2        | SHC2     | 0.57813   | 973.5   |
| ENSGALT0000 SHC (Src homology 2 domain containing) 3        | SHC3     | 0.945058  | 9       |
| ENSGALT0000 SHC (Src homology 2 domain containing) 4        | SHC4     | 0.882616  | 376     |
| ENSGALT0000 SHC SH2-domain binding protein 1                | SHCBP1   | 0.889414  | 307.5   |
| ENSGALT0000 Src homology 2 domain containing SHF            | SHF      | 0.852158  | 1395    |
| ENSGALT0000 split hand/foot malformation (ectrodactyly) 1   | SHFM1    | 0.53447   | 2359.5  |
| ENSGALT0000 sonic hedgehog                                  | SHH      | 0.86371   | 68.5    |
| ENSGALT0000 shisa homolog 2 (Xenopus laevis)                | SHISA2   | 0.773208  | 8425    |
| ENSGALT0000 shisa homolog 5 (Xenopus laevis)                | SHISA5   | 0.909521  | 2730    |
| ENSGALT0000 shisa homolog 9 (Xenopus laevis)                | SHISA9   | 0.995946  | 80      |

|                                                       |          |           |         |
|-------------------------------------------------------|----------|-----------|---------|
| ENSGALT0000 serine hydroxymethyltransferase 1         | SHMT1    | 0.665941  | 434.5   |
| ENSGALT0000 soc-2 suppressor of clear homolog         | SHOC2    | 0.957372  | 530.5   |
| ENSGALT0000 sedoheptulokinase                         | SHPK     | 0.951476  | 479.5   |
| ENSGALT0000 SNF2 histone linker PHD RING hel          | SHPRH    | 0.98893   | 783     |
| ENSGALT0000 SHQ1 homolog (S. cerevisiae)              | SHQ1     | 0.861006  | 207.5   |
| ENSGALT0000 shroom family member 1                    | SHROOM1  | 0.447453  | 26.5    |
| ENSGALT0000 shroom family member 2                    | SHROOM2  | 0.972642  | 1671.5  |
| ENSGALT0000 shroom family member 3                    | SHROOM3  | 0.939878  | 5899.5  |
| ENSGALT0000 sucrase-isomaltase (alpha-glucosic SI     |          | 0.911208  | 46.5    |
| ENSGALT0000 seven in absentia homolog 1 (Dros         | SIAH1    | 0.891506  | 610.497 |
| ENSGALT0000 seven in absentia homolog 2 (Dros         | SIAH2    | 0.955967  | 440     |
| ENSGALT0000 seven in absentia homolog 3 (Dros         | SIAH3    | 0.0980301 | 2.5     |
| ENSGALT0000 SID1 transmembrane family, memt           | SIDT1    | 0.871321  | 398.501 |
| ENSGALT0000 SID1 transmembrane family, memt           | SIDT2    | 0.976275  | 2032.15 |
| ENSGALT0000 single immunoglobulin and toll-inte       | SIGIRR   | 0.876494  | 153     |
| ENSGALT0000 sialic acid binding Ig-like lectin 15     | SIGLEC15 | 0.649519  | 0       |
| ENSGALT0000 salt-inducible kinase 1                   | SIK1     | 0.973103  | 1460    |
| ENSGALT0000 salt-inducible kinase 2                   | SIK2     | 0.982087  | 1297    |
| ENSGALT0000 SIK family kinase 3                       | SIK3     | 0.969027  | 1515    |
| ENSGALT0000 suppressor of IKBKE 1                     | SIKE1    | 0.730461  | 2296.99 |
| ENSGALT0000 SIL1 homolog, endoplasmic reticuli        | SIL1     | 0.920756  | 542.5   |
| ENSGALT0000 single-minded homolog 1 (Drosoph          | SIM1     | 0.649519  | 0.5     |
| ENSGALT0000 single-minded homolog 2 (Drosoph          | SIM2     | 0.649519  | 0       |
| ENSGALT0000 SIN3 homolog A, transcription regu        | SIN3A    | 0.981167  | 3673.5  |
| ENSGALT0000 SIN3 homolog B, transcription regu        | SIN3B    | 0.969957  | 1203    |
| ENSGALT0000 survival of motor neuron protein int      | SIP1     | 0.860554  | 827.5   |
| ENSGALT0000 signal-induced proliferation-associ       | SIPA1L1  | 0.994111  | 3236.5  |
| ENSGALT0000 signal-induced proliferation-associ       | SIPA1L2  | 0.969326  | 2290.5  |
| ENSGALT0000 signal-regulatory protein alpha           | SIRPA    | 0.973807  | 835.996 |
| ENSGALT0000 sirtuin 1                                 | SIRT1    | 0.961715  | 1357.5  |
| ENSGALT0000 sirtuin (silent mating type informati     | SIRT3    | 0.970889  | 1046    |
| ENSGALT0000 sirtuin 5                                 | SIRT5    | 0.971739  | 1625.5  |
| ENSGALT0000 sirtuin 6                                 | SIRT6    | 0.798952  | 2233    |
| ENSGALT0000 SIVA1, apoptosis-inducing factor          | SIVA1    | 0.569894  | 805.5   |
| ENSGALT0000 sine oculis homeobox homolog 1            | SIX1     | 0.878597  | 4170.1  |
| ENSGALT0000 SIX homeobox 6                            | SIX6     | 0.325394  | 5       |
| ENSGALT0000 spindle and kinetochore associat          | SKA2     | 0.804749  | 2276.5  |
| ENSGALT0000 spindle and kinetochore associat          | SKA3     | 0.833971  | 385.5   |
| ENSGALT0000 src kinase associated phosphoprot         | SKAP2    | 0.904465  | 508.5   |
| ENSGALT0000 v-ski sarcoma viral oncogene hom          | SKI      | 0.982769  | 807.994 |
| ENSGALT0000 SKI-like oncogene                         | SKIL     | 0.978994  | 803.499 |
| ENSGALT0000 superkiller viralicidic activity 2-like ( | SKIV2L   | 0.633987  | 318.5   |
| ENSGALT0000 superkiller viralicidic activity 2-like 2 | SKIV2L2  | 0.883095  | 1166.49 |
| ENSGALT0000 SKI family transcriptional corepress      | SKOR1    | 0.272544  | 15.5    |
| ENSGALT0000 SKI family transcriptional corepress      | SKOR2    | 0.0647758 | 1       |
| ENSGALT0000 S-phase kinase-associated protein         | SKP1     | 0.870094  | 8582    |
| ENSGALT0000 S-phase kinase-associated protein         | SKP2     | 0.976863  | 1659.5  |
| ENSGALT0000 Src-like-adaptor                          | SLA      | 0.681497  | 2.5     |
| ENSGALT0000 SLAIN motif family, member 1              | SLAIN1   | 0.90493   | 179     |
| ENSGALT0000 SLAIN motif family, member 2              | SLAIN2   | 0.91514   | 538.5   |
| ENSGALT0000 signaling lymphocytic activation mc       | SLAMF1   | 0.649519  | 0       |
| ENSGALT0000 SLAM family member 8                      | SLAMF8   | 0.754757  | 66.5    |
| ENSGALT0000 stem-loop binding protein                 | SLBP     | 0.878884  | 369.5   |
| ENSGALT0000 solute carrier family 10 (sodium/bile     | SLC10A1  | 1         | 0.5     |
| ENSGALT0000 solute carrier family 10 (sodium/bile     | SLC10A2  | 0.722096  | 1.5     |
| ENSGALT0000 solute carrier family 10 (sodium/bile     | SLC10A4  | 0.401817  | 147     |

|                                                                            |          |         |
|----------------------------------------------------------------------------|----------|---------|
| ENSGALT0000 solute carrier family 10 (sodium/bile SLC10A7                  | 0.955984 | 882.498 |
| ENSGALT0000 solute carrier family 11 (proton-coupled SLC11A1               | 0.990978 | 162.5   |
| ENSGALT0000 solute carrier family 12 (sodium/potassium SLC12A1             | 0.933716 | 6.5     |
| ENSGALT0000 solute carrier family 12 (sodium/potassium SLC12A2             | 0.938017 | 2111.05 |
| ENSGALT0000 solute carrier family 12 (sodium/chloride SLC12A3              | 0.988681 | 30.5    |
| ENSGALT0000 solute carrier family 12 (potassium/iodide SLC12A4             | 0.978001 | 2596.95 |
| ENSGALT0000 solute carrier family 12 (potassium/iodide SLC12A5             | 0.777877 | 234.554 |
| ENSGALT0000 solute carrier family 12 (potassium/iodide SLC12A7             | 0.993192 | 997.005 |
| ENSGALT0000 solute carrier family 12 (potassium/iodide SLC12A8             | 0.964658 | 212.5   |
| ENSGALT0000 solute carrier family 12 (potassium/iodide SLC12A9             | 0.898106 | 1070.5  |
| ENSGALT0000 solute carrier family 13 (sodium/sulfate SLC13A1               | 0        | 1       |
| ENSGALT0000 solute carrier family 13 (sodium-dependent SLC13A2             | 0.719627 | 3.5     |
| ENSGALT0000 solute carrier family 13 (sodium-dependent SLC13A3             | 0.910029 | 294.5   |
| ENSGALT0000 solute carrier family 13 (sodium/sulfate SLC13A4               | 0.607623 | 4       |
| ENSGALT0000 solute carrier family 13 (sodium-dependent SLC13A5             | 0.770869 | 24.5    |
| ENSGALT0000 solute carrier family 14 (urea transporter SLC14A2             | 0.898356 | 2       |
| ENSGALT0000 solute carrier family 15 (oligopeptide SLC15A1                 | 0.742508 | 5       |
| ENSGALT0000 solute carrier family 15 (H <sup>+</sup> /peptide SLC15A2      | 0.899038 | 18.5    |
| ENSGALT0000 solute carrier family 15, member 4 SLC15A4                     | 0.969884 | 714     |
| ENSGALT0000 solute carrier family 15, member 5 SLC15A5                     | 0.524047 | 0.5     |
| ENSGALT0000 solute carrier family 16, member 1 SLC16A1                     | 0.996356 | 3792.44 |
| ENSGALT0000 solute carrier family 16, member 10 SLC16A10                   | 0.956509 | 184     |
| ENSGALT0000 solute carrier family 16, member 12 SLC16A12                   | 0.692545 | 87      |
| ENSGALT0000 solute carrier family 16, member 13 SLC16A13                   | 0.96456  | 25      |
| ENSGALT0000 solute carrier family 16, member 14 SLC16A14                   | 0.944986 | 214.5   |
| ENSGALT0000 solute carrier family 16, member 2 SLC16A2                     | 0.996552 | 3609.5  |
| ENSGALT0000 solute carrier family 16, member 3 SLC16A3                     | 0.949262 | 1215    |
| ENSGALT0000 solute carrier family 16, member 4 SLC16A4                     | 0.949875 | 85      |
| ENSGALT0000 solute carrier family 16, member 5 SLC16A5                     | 0.917564 | 39      |
| ENSGALT0000 solute carrier family 16, member 6 SLC16A6                     | 0.950186 | 474     |
| ENSGALT0000 solute carrier family 16, member 7 SLC16A7                     | 0.843071 | 164     |
| ENSGALT0000 solute carrier family 16, member 8 SLC16A8                     | 0.6669   | 61.5    |
| ENSGALT0000 solute carrier family 16, member 9 SLC16A9                     | 0.981216 | 780.142 |
| ENSGALT0000 solute carrier family 17 (anion/sugar SLC17A5                  | 0.974784 | 1113.5  |
| ENSGALT0000 solute carrier family 17 (sodium-dependent SLC17A6             | 0.653837 | 125     |
| ENSGALT0000 solute carrier family 17 (sodium-dependent SLC17A8             | 0.29734  | 18.5    |
| ENSGALT0000 solute carrier family 17, member 9 SLC17A9                     | 0.984505 | 55      |
| ENSGALT0000 solute carrier family 18 (vesicular neurotransmitter SLC18A1   | 0.951461 | 124     |
| ENSGALT0000 solute carrier family 18 (vesicular neurotransmitter SLC18A2   | 0.776106 | 9       |
| ENSGALT0000 vesicular acetylcholine transporter SLC18A3                    | 0.862442 | 67      |
| ENSGALT0000 solute carrier family 19 (folate transporter SLC19A1           | 0.895996 | 2101.4  |
| ENSGALT0000 solute carrier family 19 (thiamine transporter SLC19A2         | 0.988498 | 164.5   |
| ENSGALT0000 solute carrier family 19, member 3 SLC19A3                     | 0.896148 | 12.5    |
| ENSGALT0000 solute carrier family 1 (neuronal/epithelial SLC1A1            | 0.955382 | 100.914 |
| ENSGALT0000 solute carrier family 1 (glial high affinity SLC1A2            | 0.864245 | 807.997 |
| ENSGALT0000 solute carrier family 1 (glial high affinity SLC1A3            | 0.922731 | 629.499 |
| ENSGALT0000 solute carrier family 1 (glutamate/neurotransmitter SLC1A4     | 0.95984  | 825.5   |
| ENSGALT0000 solute carrier family 1 (high affinity neurotransmitter SLC1A6 | 0.609758 | 213.5   |
| ENSGALT0000 solute carrier family 1 (glutamate transporter SLC1A7          | 0.377772 | 7       |
| ENSGALT0000 solute carrier family 20 (phosphate SLC20A1                    | 0.919304 | 866.5   |
| ENSGALT0000 solute carrier family 20 (phosphate SLC20A2                    | 0.971987 | 1571.51 |
| ENSGALT0000 solute carrier family 22 member 13 SLC22A13                    | 0.970481 | 327.5   |
| ENSGALT0000 solute carrier family 22, member 15 SLC22A15                   | 0.959306 | 93.5    |
| ENSGALT0000 solute carrier family 22 (organic cation SLC22A16              | 0.859517 | 10      |
| ENSGALT0000 solute carrier family 22, member 18 SLC22A18                   | 0.781338 | 11      |
| ENSGALT0000 solute carrier family 22 (organic cation SLC22A2               | 0.780657 | 0.5     |

|                                                     |          |          |         |
|-----------------------------------------------------|----------|----------|---------|
| ENSGALT0000 solute carrier family 22, member 23     | SLC22A23 | 0.961962 | 1194    |
| ENSGALT0000 solute carrier family 22 (extraneuro    | SLC22A3  | 0.966104 | 3       |
| ENSGALT0000 solute carrier family 22 (organic cat   | SLC22A4  | 0.830471 | 12.648  |
| ENSGALT0000 solute carrier family 22 (organic cat   | SLC22A5  | 0.938065 | 839.854 |
| ENSGALT0000 solute carrier family 22 (organic ani   | SLC22A7  | 0.727601 | 118.5   |
| ENSGALT0000 solute carrier family 23 (nucleobase    | SLC23A1  | 0.649519 | 1.5     |
| ENSGALT0000 solute carrier family 23 (nucleobase    | SLC23A2  | 0.951655 | 1057.01 |
| ENSGALT0000 solute carrier family 23 (nucleobase    | SLC23A3  | 0.687989 | 0.5     |
| ENSGALT0000 solute carrier family 24 (sodium/pot    | SLC24A1  | 0.818488 | 0.5     |
| ENSGALT0000 solute carrier family 24 (sodium/pot    | SLC24A2  | 0.85818  | 69.4999 |
| ENSGALT0000 solute carrier family 24 (sodium/pot    | SLC24A3  | 0.984777 | 506.5   |
| ENSGALT0000 solute carrier family 24 (sodium/pot    | SLC24A4  | 0.814407 | 168.5   |
| ENSGALT0000 solute carrier family 24, member 5      | SLC24A5  | 0.986917 | 558.844 |
| ENSGALT0000 solute carrier family 24 (sodium/pot    | SLC24A6  | 0.987195 | 215     |
| ENSGALT0000 solute carrier family 25 (mitochondr    | SLC25A1  | 0.729101 | 3101.5  |
| ENSGALT0000 solute carrier family 25 (mitochondr    | SLC25A10 | 0.839677 | 526     |
| ENSGALT0000 solute carrier family 25 (mitochondr    | SLC25A12 | 0.945599 | 1246    |
| ENSGALT0000 solute carrier family 25, member 13     | SLC25A13 | 0.938974 | 1845.53 |
| ENSGALT0000 solute carrier family 25 (mitochondr    | SLC25A14 | 0.690797 | 1430.97 |
| ENSGALT0000 solute carrier family 25 (mitochondr    | SLC25A15 | 0.875113 | 732.004 |
| ENSGALT0000 solute carrier family 25 (mitochondr    | SLC25A16 | 0.995374 | 271     |
| ENSGALT0000 solute carrier family 25 (mitochondr    | SLC25A17 | 0.879014 | 1094.76 |
| ENSGALT0000 solute carrier family 25 (mitochondr    | SLC25A19 | 0.993086 | 156     |
| ENSGALT0000 solute carrier family 25 (mitochondr    | SLC25A21 | 0.994419 | 63.5    |
| ENSGALT0000 solute carrier family 25 (mitochondr    | SLC25A22 | 0.922137 | 1125.01 |
| ENSGALT0000 solute carrier family 25 (mitochondr    | SLC25A24 | 0.90776  | 599.5   |
| ENSGALT0000 solute carrier family 25 (mitochondr    | SLC25A25 | 0.949192 | 486.002 |
| ENSGALT0000 solute carrier family 25, member 29     | SLC25A29 | 0.95057  | 622.5   |
| ENSGALT0000 solute carrier family 25 (mitochondr    | SLC25A3  | 0.8606   | 11389.2 |
| ENSGALT0000 solute carrier family 25, member 30     | SLC25A30 | 0.767173 | 196.5   |
| ENSGALT0000 solute carrier family 25, member 32     | SLC25A32 | 0.96703  | 631.5   |
| ENSGALT0000 solute carrier family 25, member 33     | SLC25A33 | 0.858529 | 764.5   |
| ENSGALT0000 solute carrier family 25, member 36     | SLC25A36 | 0.96175  | 1496.5  |
| ENSGALT0000 solute carrier family 25, member 37     | SLC25A37 | 0.991754 | 153     |
| ENSGALT0000 solute carrier family 25, member 38     | SLC25A38 | 0.908294 | 133.5   |
| ENSGALT0000 solute carrier family 25 (mitochondr    | SLC25A4  | 0.856963 | 1821    |
| ENSGALT0000 solute carrier family 25, member 42     | SLC25A42 | 0.985503 | 117     |
| ENSGALT0000 solute carrier family 25, member 43     | SLC25A43 | 0.883336 | 187     |
| ENSGALT0000 solute carrier family 25, member 46     | SLC25A46 | 0.948277 | 531     |
| ENSGALT0000 solute carrier family 25, member 47     | SLC25A47 | 0.937923 | 86.5    |
| ENSGALT0000 solute carrier family 25 (mitochondr    | SLC25A5  | 0.570954 | 5417    |
| ENSGALT0000 solute carrier family 25 (mitochondr    | SLC25A6  | 0.803773 | 42452.8 |
| ENSGALT0000 solute carrier family 26 (sulfate tran  | SLC26A1  | 1        | 3       |
| ENSGALT0000 solute carrier family 26, member 11     | SLC26A11 | 0.873665 | 468.195 |
| ENSGALT0000 solute carrier family 26 (sulfate tran  | SLC26A2  | 0.908899 | 134.5   |
| ENSGALT0000 solute carrier family 26, member 3      | SLC26A3  | 0.464758 | 0       |
| ENSGALT0000 solute carrier family 26, member 4      | SLC26A4  | 0.973709 | 184     |
| ENSGALT0000 solute carrier family 26, member 5      | SLC26A5  | 0.97746  | 268.5   |
| ENSGALT0000 solute carrier family 26, member 7      | SLC26A7  | 0.649519 | 1       |
| ENSGALT0000 solute carrier family 26, member 8      | SLC26A8  | 0.988206 | 145.5   |
| ENSGALT0000 solute carrier family 26, member 9      | SLC26A9  | 0.79312  | 129     |
| ENSGALT0000 solute carrier family 27, member 1      | SLC27A1  | 0.939967 | 1112    |
| ENSGALT0000 solute carrier family 27 (fatty acid tr | SLC27A4  | 0.93299  | 2220    |
| ENSGALT0000 solute carrier family 27 (fatty acid tr | SLC27A5  | 0.997745 | 224.5   |
| ENSGALT0000 solute carrier family 27 (fatty acid tr | SLC27A6  | 0.709702 | 15.5    |
| ENSGALT0000 solute carrier family 28 (sodium-co     | SLC28A2  | 0.937693 | 76      |

|                                                     |          |          |         |
|-----------------------------------------------------|----------|----------|---------|
| ENSGALT0000 solute carrier family 28 (sodium-co     | SLC28A3  | 0.872443 | 1       |
| ENSGALT0000 solute carrier family 29 (nucleoside    | SLC29A1  | 0.932357 | 846.5   |
| ENSGALT0000 solute carrier family 29 (nucleoside    | SLC29A3  | 0.913196 | 191.675 |
| ENSGALT0000 solute carrier family 29 (nucleoside    | SLC29A4  | 0.570252 | 483.04  |
| ENSGALT0000 solute carrier family 2 (facilitated gl | SLC2A1   | 0.932975 | 4924.5  |
| ENSGALT0000 solute carrier family 2 (facilitated gl | SLC2A11  | 0.948298 | 33      |
| ENSGALT0000 solute carrier family 2 (facilitated gl | SLC2A12  | 0.977992 | 47.5    |
| ENSGALT0000 solute carrier family 2 (facilitated gl | SLC2A2   | 0.79181  | 1.5     |
| ENSGALT0000 solute carrier family 2 (facilitated gl | SLC2A3   | 0.833815 | 406.002 |
| ENSGALT0000 solute carrier family 2 (facilitated gl | SLC2A5   | 0.36134  | 5.5     |
| ENSGALT0000 solute carrier family 2 (facilitated gl | SLC2A8   | 0.959534 | 1046    |
| ENSGALT0000 solute carrier family 2 (facilitated gl | SLC2A9   | 0.697984 | 151.5   |
| ENSGALT0000 solute carrier family 30 (zinc transp   | SLC30A1  | 0.941584 | 364     |
| ENSGALT0000 solute carrier family 30, member 1C     | SLC30A10 | 0.994942 | 43.5    |
| ENSGALT0000 solute carrier family 30 (zinc transp   | SLC30A2  | 0.446534 | 1.5     |
| ENSGALT0000 solute carrier family 30 (zinc transp   | SLC30A5  | 0.990513 | 1799.04 |
| ENSGALT0000 solute carrier family 30 (zinc transp   | SLC30A6  | 0.995875 | 607     |
| ENSGALT0000 solute carrier family 30 (zinc transp   | SLC30A7  | 0.98649  | 709.5   |
| ENSGALT0000 solute carrier family 30 (zinc transp   | SLC30A8  | 0.252982 | 0       |
| ENSGALT0000 solute carrier family 30 (zinc transp   | SLC30A9  | 0.990085 | 1047.5  |
| ENSGALT0000 solute carrier family 31 (copper trar   | SLC31A1  | 0.947658 | 576.5   |
| ENSGALT0000 solute carrier family 31 (copper trar   | SLC31A2  | 0.69444  | 36.5    |
| ENSGALT0000 solute carrier family 32 (GABA vesi     | SLC32A1  | 0.603682 | 1       |
| ENSGALT0000 solute carrier family 33 (acetyl-CoA    | SLC33A1  | 0.934651 | 745.5   |
| ENSGALT0000 solute carrier family 34 (sodium ph     | SLC34A1  | 0.75221  | 1.5     |
| ENSGALT0000 solute carrier family 34 (sodium ph     | SLC34A2  | 0.80961  | 12.5    |
| ENSGALT0000 solute carrier family 35 (CMP-sialic    | SLC35A1  | 0.872775 | 718.5   |
| ENSGALT0000 solute carrier family 35 (UDP-N-ac      | SLC35A3  | 0.990872 | 261.501 |
| ENSGALT0000 solute carrier family 35, member A      | SLC35A4  | 0.942187 | 666     |
| ENSGALT0000 solute carrier family 35, member A      | SLC35A5  | 0.99053  | 522     |
| ENSGALT0000 solute carrier family 35, member B      | SLC35B1  | 0.841649 | 3784.01 |
| ENSGALT0000 solute carrier family 35, member B      | SLC35B2  | 0.953066 | 895.5   |
| ENSGALT0000 solute carrier family 35, member B      | SLC35B3  | 0.986448 | 488     |
| ENSGALT0000 solute carrier family 35, member B      | SLC35B4  | 0.931087 | 1687.5  |
| ENSGALT0000 solute carrier family 35, member C      | SLC35C1  | 0.914669 | 1487.56 |
| ENSGALT0000 solute carrier family 35, member C      | SLC35C2  | 0.989519 | 1063.5  |
| ENSGALT0000 solute carrier family 35 (UDP-glucu     | SLC35D1  | 0.995696 | 580.5   |
| ENSGALT0000 solute carrier family 35, member D      | SLC35D2  | 0.948255 | 11.5    |
| ENSGALT0000 solute carrier family 35, member D      | SLC35D3  | 0.762552 | 10      |
| ENSGALT0000 solute carrier family 35, member E      | SLC35E1  | 0.899958 | 1052.5  |
| ENSGALT0000 solute carrier family 35, member E      | SLC35E2B | 0.867797 | 1097    |
| ENSGALT0000 solute carrier family 35, member E      | SLC35E3  | 0.959583 | 2924.5  |
| ENSGALT0000 solute carrier family 35, member F      | SLC35F1  | 0.939078 | 1546    |
| ENSGALT0000 solute carrier family 35, member F      | SLC35F2  | 0.908099 | 125.5   |
| ENSGALT0000 solute carrier family 35, member F      | SLC35F3  | 0.743528 | 394     |
| ENSGALT0000 solute carrier family 35, member F      | SLC35F4  | 0.965626 | 14.5    |
| ENSGALT0000 solute carrier family 35, member F      | SLC35F5  | 0.996416 | 440     |
| ENSGALT0000 solute carrier family 35, member G      | SLC35G1  | 0.985524 | 49      |
| ENSGALT0000 solute carrier family 36 (proton/ami    | SLC36A4  | 0.998038 | 75.5    |
| ENSGALT0000 solute carrier family 37 (glycerol-3-   | SLC37A1  | 0.950783 | 216.5   |
| ENSGALT0000 solute carrier family 37 (glycerol-3-   | SLC37A2  | 0.772315 | 162.5   |
| ENSGALT0000 solute carrier family 37 (glycerol-3-   | SLC37A3  | 0.951402 | 1760.51 |
| ENSGALT0000 solute carrier family 37 (glucose-6-    | SLC37A4  | 0.947282 | 1882.5  |
| ENSGALT0000 solute carrier family 38, member 1      | SLC38A1  | 0.967168 | 1791    |
| ENSGALT0000 solute carrier family 38, member 1C     | SLC38A10 | 0.969691 | 10743.5 |
| ENSGALT0000 solute carrier family 38, member 11     | SLC38A11 | 0.943804 | 32.5    |

|                                                    |          |          |         |
|----------------------------------------------------|----------|----------|---------|
| ENSGALT0000 solute carrier family 38, member 2     | SLC38A2  | 0.930109 | 3613.6  |
| ENSGALT0000 solute carrier family 38, member 4     | SLC38A4  | 0.295989 | 3       |
| ENSGALT0000 solute carrier family 38, member 5     | SLC38A5  | 0.627171 | 72      |
| ENSGALT0000 solute carrier family 38, member 6     | SLC38A6  | 0.974223 | 1199.5  |
| ENSGALT0000 solute carrier family 38, member 7     | SLC38A7  | 0.928538 | 879.893 |
| ENSGALT0000 solute carrier family 38, member 8     | SLC38A8  | 0.13619  | 0.5     |
| ENSGALT0000 solute carrier family 38, member 9     | SLC38A9  | 0.991151 | 195     |
| ENSGALT0000 solute carrier family 39 (zinc transp  | SLC39A10 | 0.993134 | 1812    |
| ENSGALT0000 solute carrier family 39 (metal ion tr | SLC39A11 | 0.954626 | 734     |
| ENSGALT0000 solute carrier family 39 (zinc transp  | SLC39A12 | 0.696875 | 149.5   |
| ENSGALT0000 solute carrier family 39 (zinc transp  | SLC39A13 | 0.995617 | 1370.5  |
| ENSGALT0000 solute carrier family 39 (zinc transp  | SLC39A3  | 0.93559  | 359     |
| ENSGALT0000 solute carrier family 39 (zinc transp  | SLC39A6  | 0.971406 | 1332    |
| ENSGALT0000 solute carrier family 39 (zinc transp  | SLC39A8  | 0.909561 | 82      |
| ENSGALT0000 solute carrier family 39 (zinc transp  | SLC39A9  | 0.954839 | 2689    |
| ENSGALT0000 solute carrier family 3 (cystine, dibæ | SLC3A1   | 0.991599 | 76.5    |
| ENSGALT0000 solute carrier family 40 (iron-regula  | SLC40A1  | 0.935627 | 1116    |
| ENSGALT0000 solute carrier family 41, member 1     | SLC41A1  | 0.988082 | 936.5   |
| ENSGALT0000 solute carrier family 41, member 2     | SLC41A2  | 0.952937 | 737.5   |
| ENSGALT0000 solute carrier family 41, member 3     | SLC41A3  | 0.909629 | 679.5   |
| ENSGALT0000 solute carrier family 43, member 2     | SLC43A2  | 0.912917 | 492.5   |
| ENSGALT0000 solute carrier family 43, member 3     | SLC43A3  | 0.718422 | 300     |
| ENSGALT0000 solute carrier family 44, member 1     | SLC44A1  | 0.955537 | 886     |
| ENSGALT0000 solute carrier family 44, member 3     | SLC44A3  | 0.935622 | 769     |
| ENSGALT0000 solute carrier family 44, member 5     | SLC44A5  | 0.981657 | 693     |
| ENSGALT0000 solute carrier family 45, member 1     | SLC45A1  | 0.988433 | 1255    |
| ENSGALT0000 solute carrier family 45, member 2     | SLC45A2  | 0.766479 | 205.5   |
| ENSGALT0000 solute carrier family 45, member 3     | SLC45A3  | 0.840467 | 122     |
| ENSGALT0000 solute carrier family 45, member 4     | SLC45A4  | 0.983358 | 412.5   |
| ENSGALT0000 solute carrier family 46 (folate trans | SLC46A1  | 0.963305 | 526     |
| ENSGALT0000 solute carrier family 46, member 3     | SLC46A3  | 0.985992 | 107.5   |
| ENSGALT0000 solute carrier family 47, member 1     | SLC47A1  | 0.983034 | 585.501 |
| ENSGALT0000 solute carrier family 47, member 2     | SLC47A2  | 0.646369 | 6       |
| ENSGALT0000 hypothetical protein LOC426887         | SLC48A1  | 0.962498 | 515.5   |
| ENSGALT0000 solute carrier family 4, sodium bica   | SLC4A10  | 0.999072 | 429     |
| ENSGALT0000 solute carrier family 4, sodium bora   | SLC4A11  | 0.893629 | 374.5   |
| ENSGALT0000 solute carrier family 4 (anion excha   | SLC4A1AP | 0.910261 | 639.997 |
| ENSGALT0000 solute carrier family 4, anion excha   | SLC4A3   | 0.912339 | 1839.5  |
| ENSGALT0000 solute carrier family 4, sodium bica   | SLC4A4   | 0.927901 | 1390.04 |
| ENSGALT0000 solute carrier family 4, sodium bica   | SLC4A5   | 0.968682 | 56.5    |
| ENSGALT0000 solute carrier family 4, sodium bica   | SLC4A7   | 0.934809 | 563     |
| ENSGALT0000 solute carrier family 4, sodium bica   | SLC4A8   | 0.964708 | 3979.53 |
| ENSGALT0000 solute carrier family 4, sodium bica   | SLC4A9   | 0.895318 | 3       |
| ENSGALT0000 solute carrier family 5 (sodium/gluc   | SLC5A1   | 0.864156 | 36      |
| ENSGALT0000 solute carrier family 5 (sodium/gluc   | SLC5A11  | 0.900654 | 26.5    |
| ENSGALT0000 solute carrier family 5 (sodium/gluc   | SLC5A12  | 0.722096 | 0.5     |
| ENSGALT0000 solute carrier family 5 (choline tran  | SLC5A7   | 0.522813 | 3.5     |
| ENSGALT0000 solute carrier family 5 (iodide trans  | SLC5A8   | 0.540829 | 2.5     |
| ENSGALT0000 solute carrier family 5 (sodium/gluc   | SLC5A9   | 0.995905 | 63      |
| ENSGALT0000 solute carrier family 6 (neurotransr   | SLC6A1   | 0.665984 | 29      |
| ENSGALT0000 solute carrier family 6 (neurotransr   | SLC6A11  | 0.676863 | 5.5     |
| ENSGALT0000 solute carrier family 6 (neutral amir  | SLC6A15  | 0.866781 | 361     |
| ENSGALT0000 solute carrier family 6 (neutral amir  | SLC6A19  | 0.534404 | 1.5     |
| ENSGALT0000 solute carrier family 6 (neurotransr   | SLC6A2   | 0.844676 | 71.5    |
| ENSGALT0000 solute carrier family 6 (proline IMIN  | SLC6A20  | 0.631223 | 1       |
| ENSGALT0000 solute carrier family 6 (neurotransr   | SLC6A4   | 0.999048 | 10      |

|             |                                       |          |          |         |
|-------------|---------------------------------------|----------|----------|---------|
| ENSGALT0000 | solute carrier family 6 (neurotransp  | SLC6A5   | 0.440513 | 0.5     |
| ENSGALT0000 | solute carrier family 6 (neurotransp  | SLC6A6   | 0.830686 | 696.5   |
| ENSGALT0000 | solute carrier family 6 (neurotransp  | SLC6A7   | 0.430654 | 4.5     |
| ENSGALT0000 | solute carrier family 6 (neurotransp  | SLC6A9   | 0.993388 | 1754    |
| ENSGALT0000 | solute carrier family 7 (cationic ami | SLC7A1   | 0.952135 | 708     |
| ENSGALT0000 | solute carrier family 7, (neutral ami | SLC7A10  | 0.916731 | 167.5   |
| ENSGALT0000 | solute carrier family 7 (anionic amir | SLC7A11  | 0.697918 | 101.5   |
| ENSGALT0000 | solute carrier family 7 (anionic amir | SLC7A13  | 0.464758 | 0.5     |
| ENSGALT0000 | solute carrier family 7 (orphan trans | SLC7A14  | 0.640086 | 97.5001 |
| ENSGALT0000 | solute carrier family 7 (cationic ami | SLC7A2   | 0.98026  | 46.5    |
| ENSGALT0000 | solute carrier family 7 (cationic ami | SLC7A3   | 0.898469 | 776     |
| ENSGALT0000 | solute carrier family 7 (amino acid t | SLC7A5   | 0.86566  | 4911.73 |
| ENSGALT0000 | solute carrier family 7 (amino acid t | SLC7A6   | 0.959449 | 589     |
| ENSGALT0000 | solute carrier family 7, member 6 o   | SLC7A6OS | 0.889012 | 696     |
| ENSGALT0000 | solute carrier family 7 (amino acid t | SLC7A7   | 0.974887 | 46.5    |
| ENSGALT0000 | solute carrier family 7 (glycoprotein | SLC7A9   | 0.983074 | 22      |
| ENSGALT0000 | solute carrier family 8 (sodium/calci | SLC8A1   | 0.863732 | 165     |
| ENSGALT0000 | solute carrier family 8 (sodium/calci | SLC8A3   | 0.751141 | 111     |
| ENSGALT0000 | solute carrier family 9 (sodium/hydr  | SLC9A1   | 0.921288 | 2164.31 |
| ENSGALT0000 | solute carrier family 9 (sodium/hydr  | SLC9A2   | 0.679163 | 280     |
| ENSGALT0000 | solute carrier family 9 (sodium/hydr  | SLC9A3   | 0.580104 | 0.5     |
| ENSGALT0000 | solute carrier family 9 (sodium/hydr  | SLC9A3R1 | 0.956999 | 1111    |
| ENSGALT0000 | solute carrier family 9 (sodium/hydr  | SLC9A3R2 | 0.820899 | 1190    |
| ENSGALT0000 | solute carrier family 9 (sodium/hydr  | SLC9A4   | 0.783349 | 379.001 |
| ENSGALT0000 | solute carrier family 9 (sodium/hydr  | SLC9A6   | 0.912064 | 1343.5  |
| ENSGALT0000 | solute carrier family 9 (sodium/hydr  | SLC9A7   | 0.938103 | 404.5   |
| ENSGALT0000 | solute carrier family 9 (sodium/hydr  | SLC9A8   | 0.993493 | 1489    |
| ENSGALT0000 | solute carrier family 9 (sodium/hydr  | SLC9A9   | 0.878584 | 105.5   |
| ENSGALT0000 | solute carrier organic anion transp   | SLCO1A2  | 0.732378 | 1.5     |
| ENSGALT0000 | solute carrier organic anion transp   | SLCO1B3  | 0.818488 | 1       |
| ENSGALT0000 | solute carrier organic anion transp   | SLCO1C1  | ?        | 0       |
| ENSGALT0000 | solute carrier organic anion transp   | SLCO2A1  | 0.707338 | 147.5   |
| ENSGALT0000 | solute carrier organic anion transp   | SLCO2B1  | 0.751173 | 47      |
| ENSGALT0000 | solute carrier organic anion transp   | SLCO3A1  | 0.781522 | 197     |
| ENSGALT0000 | solute carrier organic anion transp   | SLCO4A1  | 0.878397 | 191.5   |
| ENSGALT0000 | solute carrier organic anion transp   | SLCO5A1  | 0.989532 | 1287    |
| ENSGALT0000 | slit homolog 2 (Drosophila)           | SLIT2    | 0.992403 | 2861.53 |
| ENSGALT0000 | slit homolog 3 (Drosophila)           | SLIT3    | 0.857944 | 1817.51 |
| ENSGALT0000 | SLIT and NTRK-like family, membe      | SLITRK1  | 0.792914 | 40.5    |
| ENSGALT0000 | SLIT and NTRK-like family, membe      | SLITRK2  | 0.980543 | 882     |
| ENSGALT0000 | SLIT and NTRK-like family, membe      | SLITRK4  | 0.872675 | 189.5   |
| ENSGALT0000 | SLIT and NTRK-like family, membe      | SLITRK6  | 0.997218 | 912.5   |
| ENSGALT0000 | STE20-like kinase                     | SLK      | 0.990594 | 2046.5  |
| ENSGALT0000 | sarcolemma associated protein         | SLMAP    | 0.994341 | 1628    |
| ENSGALT0000 | slowmo homolog 1 (Drosophila)         | SLMO1    | 0.819997 | 440.973 |
| ENSGALT0000 | slowmo homolog 2 (Drosophila)         | SLMO2    | 0.962354 | 1637.01 |
| ENSGALT0000 | SAFB-like, transcription modulator    | SLTM     | 0.928932 | 1949    |
| ENSGALT0000 | SLU7 splicing factor homolog (S. c    | SLU7     | 0.980137 | 1404.49 |
| ENSGALT0000 | SLX4 structure-specific endonucle     | SLX4     | 0.952414 | 1089.5  |
| ENSGALT0000 | SMAD family member 1                  | SMAD1    | 0.892094 | 2399.5  |
| ENSGALT0000 | SMAD family member 2                  | SMAD2    | 0.959878 | 1499.51 |
| ENSGALT0000 | SMAD family member 3                  | SMAD3    | 0.997288 | 2493.96 |
| ENSGALT0000 | SMAD family member 5                  | SMAD5    | 0.932148 | 1652.5  |
| ENSGALT0000 | SMAD family member 6                  | SMAD6    | 0.865204 | 1799.03 |
| ENSGALT0000 | SMAD family member 7                  | SMAD7    | 0.923622 | 396     |
| ENSGALT0000 | SMAD family member 9                  | SMAD9    | 0.79456  | 257     |



|                                                          |          |          |         |
|----------------------------------------------------------|----------|----------|---------|
| ENSGALT0000 small ArfGAP 1                               | SMAP1    | 0.976496 | 2922    |
| ENSGALT0000 small ArfGAP2                                | SMAP2    | 0.917188 | 848.006 |
| ENSGALT0000 SWI/SNF related, matrix associated           | SMARCA1  | 0.956172 | 1394.5  |
| ENSGALT0000 SWI/SNF related, matrix associated           | SMARCA2  | 0.986372 | 3019    |
| ENSGALT0000 SWI/SNF related, matrix associated           | SMARCA4  | 0.850047 | 3185.5  |
| ENSGALT0000 SWI/SNF related, matrix associated           | SMARCA5  | 0.952889 | 3567.57 |
| ENSGALT0000 SWI/SNF-related, matrix-associated           | SMARCAD1 | 0.979883 | 1030    |
| ENSGALT0000 SWI/SNF related, matrix associated           | SMARCAL1 | 0.968954 | 533.5   |
| ENSGALT0000 SWI/SNF related, matrix associated           | SMARCB1  | 0.869033 | 4292.5  |
| ENSGALT0000 SWI/SNF related, matrix associated           | SMARCC1  | 0.908767 | 13780.2 |
| ENSGALT0000 SWI/SNF related, matrix associated           | SMARCD1  | 0.896605 | 3154.5  |
| ENSGALT0000 SWI/SNF related, matrix associated           | SMARCD2  | 0.884253 | 2364    |
| ENSGALT0000 SWI/SNF related, matrix associated           | SMARCD3  | 0.996974 | 712.5   |
| ENSGALT0000 SWI/SNF related, matrix associated           | SMARCE1  | 0.922457 | 10587.5 |
| ENSGALT0000 structural maintenance of chromosome         | SMC1B    | 0.649519 | 0       |
| ENSGALT0000 structural maintenance of chromosome         | SMC2     | 0.901999 | 1994.49 |
| ENSGALT0000 structural maintenance of chromosome         | SMC3     | 0.980555 | 3733.02 |
| ENSGALT0000 structural maintenance of chromosome         | SMC4     | 0.944056 | 1429.49 |
| ENSGALT0000 SMC5 protein                                 | SMC5     | 0.926853 | 485.997 |
| ENSGALT0000 structural maintenance of chromosome         | SMC6     | 0.986935 | 639     |
| ENSGALT0000 structural maintenance of chromosome         | SMCHD1   | 0.989528 | 1022.5  |
| ENSGALT0000 Smith-Magenis syndrome chromosome            | SMCR7    | 0.894926 | 185     |
| ENSGALT0000 Smith-Magenis syndrome chromosome            | SMCR7L   | 0.929015 | 593     |
| ENSGALT0000 Smith-Magenis syndrome chromosome            | SMCR8    | 0.960906 | 217.5   |
| ENSGALT0000 SMEK homolog 1, suppressor of morphogenesis  | SMEK1    | 0.968387 | 1217.5  |
| ENSGALT0000 SMEK homolog 2, suppressor of morphogenesis  | SMEK2    | 0.934754 | 2579.5  |
| ENSGALT0000 smg-1 homolog, phosphatidylinositol 3-kinase | SMG1     | 0.971302 | 3352    |
| ENSGALT0000 Smg-5 homolog, nonsense mediated decay       | SMG5     | 0.966383 | 1038.5  |
| ENSGALT0000 Smg-6 homolog, nonsense mediated decay       | SMG6     | 0.956268 | 1282.5  |
| ENSGALT0000 Smg-7 homolog, nonsense mediated decay       | SMG7     | 0.954899 | 2220.5  |
| ENSGALT0000 smg-8 homolog, nonsense mediated decay       | SMG8     | 0.938573 | 2317.5  |
| ENSGALT0000 survival motor neuron                        | SMN      | 0.880409 | 1579    |
| ENSGALT0000 survival motor neuron domain containing      | SMNDC1   | 0.955295 | 730.5   |
| ENSGALT0000 smoothed, frizzled family receptor           | SMO      | 0.945841 | 4020    |
| ENSGALT0000 SPARC related modular calcium binding        | SMOC1    | 0.559072 | 95      |
| ENSGALT0000 SPARC related modular calcium binding        | SMOC2    | 0.901811 | 903     |
| ENSGALT0000 spermine oxidase                             | SMOX     | 0.903978 | 385     |
| ENSGALT0000 sphingomyelin phosphodiesterase              | SMPD1    | 0.972797 | 34.6499 |
| ENSGALT0000 sphingomyelin phosphodiesterase              | SMPD2    | 0.912981 | 624     |
| ENSGALT0000 sphingomyelin phosphodiesterase              | SMPD3    | 0.762424 | 497     |
| ENSGALT0000 sphingomyelin phosphodiesterase              | SMPD4    | 0.990199 | 685     |
| ENSGALT0000 sphingomyelin phosphodiesterase, family      | SMPDL3B  | 0.979913 | 410.5   |
| ENSGALT0000 small muscle protein, X-linked               | SMPX     | 0.976096 | 2       |
| ENSGALT0000 spermine synthase                            | SMS      | 0.857434 | 1572    |
| ENSGALT0000 smoothelin                                   | SMTN     | 0.856089 | 478.501 |
| ENSGALT0000 smoothelin-like 2                            | SMTNL2   | 0.936852 | 718.106 |
| ENSGALT0000 smu-1 suppressor of mec-8 and unc-49         | SMU1     | 0.954518 | 4319.5  |
| ENSGALT0000 single-strand-selective monofunctional       | SMUG1    | 0.646558 | 1177    |
| ENSGALT0000 SMAD specific E3 ubiquitin protein           | SMURF1   | 0.916244 | 410     |
| ENSGALT0000 SMAD specific E3 ubiquitin protein           | SMURF2   | 0.979243 | 535     |
| ENSGALT0000 SET and MYND domain containing               | SMYD1    | 0.59243  | 0.5     |
| ENSGALT0000 SET and MYND domain containing               | SMYD2    | 0.717915 | 649.5   |
| ENSGALT0000 SET and MYND domain containing               | SMYD3    | 0.9908   | 56.5    |
| ENSGALT0000 SET and MYND domain containing               | SMYD4    | 0.918234 | 574.497 |
| ENSGALT0000 SMYD family member 5                         | SMYD5    | 0.825288 | 1630.5  |
| ENSGALT0000 snail homolog 1 (Drosophila)                 | SNAI1    | 0.793725 | 1017    |

|                                                      |                |            |         |
|------------------------------------------------------|----------------|------------|---------|
| ENSGALT0000 snail homolog 2 (Drosophila)             | SNAI2          | 0.880437   | 232.936 |
| ENSGALT0000 synaptosomal-associated protein, $\zeta$ | SNAP23         | 0.985611   | 775.5   |
| ENSGALT0000 synaptosomal-associated protein, $\zeta$ | SNAP25         | 0.360716   | 645.498 |
| ENSGALT0000 synaptosomal-associated protein, $\zeta$ | SNAP29         | 0.901449   | 1107    |
| ENSGALT0000 synaptosomal-associated protein, $\zeta$ | SNAP47         | 0.924835   | 321.5   |
| ENSGALT0000 synaptosomal-associated protein, $\xi$   | SNAP91         | 0.668432   | 1384.51 |
| ENSGALT0000 small nuclear RNA activating comp        | SNAPC1         | 0.910443   | 665.999 |
| ENSGALT0000 small nuclear RNA activating comp        | SNAPC3         | 0.844521   | 462     |
| ENSGALT0000 small nuclear RNA activating comp        | SNAPC4         | 0.973791   | 607.5   |
| ENSGALT0000 small nuclear RNA activating comp        | SNAPC5         | 0.901674   | 1166    |
| ENSGALT0000 synuclein, alpha (non A4 compone         | SNCA           | 0.340254   | 27.5    |
| ENSGALT0000 synuclein, alpha interacting protein     | SNCAIP         | 0.797814   | 1304    |
| ENSGALT0000 synuclein, beta                          | SNCB           | 0.507939   | 589     |
| ENSGALT0000 synuclein, gamma                         | SNCG           | 0.00559734 | 137.5   |
| ENSGALT0000 sushi, nidogen and EGF-like domai        | SNED1          | 0.983833   | 2611    |
| ENSGALT0000 SNF8, ESCRT-II complex subunit,          | SNF8           | 0.637667   | 908     |
| ENSGALT0000 Smad nuclear interacting protein 1       | SNIP1          | 0.933249   | 964.5   |
| ENSGALT0000 stannin                                  | SNN            | 0.921636   | 97.5    |
| ENSGALT0000 Small nucleolar RNA MBII-202             | snoMBII-202    | 0.161718   | 14      |
| ENSGALT0000 Small nucleolar RNA Me28S-Am98           | snoMe28S-Am982 | 1          | 0.5     |
| ENSGALT0000 Small nucleolar RNA R11/Z151             | snoR11         | ?          | 0       |
| ENSGALT0000 Small nucleolar RNA SNORA1               | SNORA1         | 0.596151   | 6       |
| ENSGALT0000 Small nucleolar RNA SNORA12              | SNORA12        | 0.464758   | 0       |
| ENSGALT0000 Small nucleolar RNA SNORA13              | SNORA13        | 0.780657   | 1       |
| ENSGALT0000 Small nucleolar RNA SNORA14              | SNORA14        | 0.746327   | 1       |
| ENSGALT0000 Small nucleolar RNA SNORA15              | SNORA15        | 0.641802   | 1       |
| ENSGALT0000 Small nucleolar RNA SNORA16B/S           | SNORA16        | 0.881672   | 9.5     |
| ENSGALT0000 Small nucleolar RNA SNORA17              | SNORA17        | 0.390283   | 3.5     |
| ENSGALT0000 Small nucleolar RNA SNORA18              | SNORA18        | 0.997433   | 29.5    |
| ENSGALT0000 Small nucleolar RNA SNORA19              | SNORA19        | 0.821187   | 1.5     |
| ENSGALT0000 Small nucleolar RNA SNORA20              | SNORA20        | 0.882433   | 4       |
| ENSGALT0000 Small nucleolar RNA SNORA21              | SNORA21        | 0.914503   | 14.5    |
| ENSGALT0000 Small nucleolar RNA SNORA22              | SNORA22        | 0.680622   | 1       |
| ENSGALT0000 Small nucleolar RNA SNORA23              | SNORA23        | 0.935842   | 2.5     |
| ENSGALT0000 Small nucleolar RNA SNORA24              | SNORA24        | 0.842641   | 8.5     |
| ENSGALT0000 Small nucleolar RNA SNORA25              | SNORA25        | 0.96276    | 25.5    |
| ENSGALT0000 Small nucleolar RNA SNORA26              | SNORA26        | 0.610298   | 8.5     |
| ENSGALT0000 Small nucleolar RNA SNORA27              | SNORA27        | 0.559671   | 2.5     |
| ENSGALT0000 Small nucleolar RNA SNORA28              | SNORA28        | 0.963974   | 6       |
| ENSGALT0000 Small nucleolar RNA SNORA29              | SNORA29        | 0.733661   | 2       |
| ENSGALT0000 Small nucleolar RNA SNORA3/SN            | SNORA3         | 0.811905   | 15      |
| ENSGALT0000 Small nucleolar RNA SNORA31              | SNORA31        | 0.867081   | 45      |
| ENSGALT0000 Small nucleolar RNA SNORA32              | SNORA32        | 0.859886   | 9.5     |
| ENSGALT0000 Small nucleolar RNA SNORA33              | SNORA33        | 0.838748   | 4.5     |
| ENSGALT0000 Small nucleolar RNA SNORA35              | SNORA35        | 0.778348   | 2       |
| ENSGALT0000 Small nucleolar RNA SNORA36 far          | SNORA36        | 0.956132   | 9       |
| ENSGALT0000 Small nucleolar RNA SNORA4               | SNORA4         | 0.970051   | 17      |
| ENSGALT0000 Small nucleolar RNA SNORA40              | SNORA40        | 0.961639   | 18      |
| ENSGALT0000 Small nucleolar RNA SNORA41              | SNORA41        | 0.824346   | 4       |
| ENSGALT0000 Small nucleolar RNA SNORA44              | SNORA44        | 0.904885   | 10      |
| ENSGALT0000 Small nucleolar RNA SNORA46              | SNORA46        | 0.821187   | 0.5     |
| ENSGALT0000 Small nucleolar RNA SNORA47              | SNORA47        | 0.849633   | 4.5     |
| ENSGALT0000 Small nucleolar RNA SNORA5               | SNORA5         | 0.84112    | 15      |
| ENSGALT0000 Small nucleolar RNA SNORA51              | SNORA51        | 0.998956   | 15.5    |
| ENSGALT0000 Small nucleolar RNA SNORA52              | SNORA52        | 0.75221    | 1.5     |
| ENSGALT0000 Small nucleolar RNA SNORA53              | SNORA53        | 0.86806    | 5.5     |

|             |                                       |           |          |          |
|-------------|---------------------------------------|-----------|----------|----------|
| ENSGALT0000 | Small nucleolar RNA SNORA54           | SNORA54   | 0.806823 | 1        |
| ENSGALT0000 | Small nucleolar RNA SNORA55           | SNORA55   | 0.929536 | 14       |
| ENSGALT0000 | Small nucleolar RNA SNORA56           | SNORA56   | 0.828826 | 1        |
| ENSGALT0000 | Small nucleolar RNA SNORA58           | SNORA58   | 0.512345 | 2        |
| ENSGALT0000 | Small nucleolar RNA SNORA61           | SNORA61   | 0.868542 | 8.5      |
| ENSGALT0000 | Small nucleolar RNA SNORA62/SNORA62   | SNORA62   | 0.646923 | 20       |
| ENSGALT0000 | Small nucleolar RNA SNORA63           | SNORA63   | 0.990693 | 13.5     |
| ENSGALT0000 | Small nucleolar RNA SNORA65           | SNORA65   | 0.984457 | 29       |
| ENSGALT0000 | Small nucleolar RNA SNORA66           | SNORA66   | 0.780657 | 4        |
| ENSGALT0000 | Small nucleolar RNA SNORA68           | SNORA68   | 0.464758 | 7.48E-15 |
| ENSGALT0000 | Small nucleolar RNA SNORA69           | SNORA69   | 0.675214 | 4.5      |
| ENSGALT0000 | Small nucleolar RNA SNORA7            | SNORA7    | 0.984177 | 39       |
| ENSGALT0000 | Small nucleolar RNA SNORA71           | SNORA71   | 0.820338 | 22       |
| ENSGALT0000 | Small nucleolar RNA SNORA72           | SNORA72   | 0.773583 | 1.5      |
| ENSGALT0000 | Small nucleolar RNA SNORA73 far       | SNORA73   | 0.579702 | 23.5     |
| ENSGALT0000 | Small nucleolar RNA SNORA74           | SNORA74   | 0.649519 | 0        |
| ENSGALT0000 | Small nucleolar RNA SNORA75           | SNORA75   | 0.928091 | 4.5      |
| ENSGALT0000 | Small nucleolar RNA SNORA76           | SNORA76   | 0.649519 | 0        |
| ENSGALT0000 | Small nucleolar RNA SNORA77           | SNORA77   | 0.947433 | 5.5      |
| ENSGALT0000 | Small nucleolar RNA SNORA8            | SNORA8    | 0.993781 | 49       |
| ENSGALT0000 | Small nucleolar RNA SNORA84           | SNORA84   | 0.464758 | 0        |
| ENSGALT0000 | Small Nucleolar RNA SNORD100          | SNORD100  | 0.712781 | 51.5     |
| ENSGALT0000 | Small nucleolar RNA SNORD101          | SNORD101  | 0.712387 | 2        |
| ENSGALT0000 | Small nucleolar RNA SNORD102          | SNORD102  | 0.927729 | 1        |
| ENSGALT0000 | Small nucleolar RNA SNORD103/SNORD103 | SNORD103  | 0.998645 | 7.5      |
| ENSGALT0000 | Small Nucleolar RNA SNORD111          | SNORD111  | 0.464758 | 0        |
| ENSGALT0000 | Small nucleolar RNA SNORD11B          | SNORD11B  | 1        | 1        |
| ENSGALT0000 | Small nucleolar SNORD12/SNORD12       | SNORD12   | 0.867316 | 15       |
| ENSGALT0000 | Small nucleolar RNA SNORD121A         | SNORD121A | 0.603682 | 1        |
| ENSGALT0000 | Small nucleolar RNA SNORD123          | SNORD123  | 0.780657 | 1.5      |
| ENSGALT0000 | Small nucleolar RNA SNORD125          | SNORD125  | 0.832974 | 6.5      |
| ENSGALT0000 | Small nucleolar RNA SNORD127          | SNORD127  | 0.980285 | 8        |
| ENSGALT0000 | Small nucleolar RNA SNORD14           | SNORD14   | 0.864227 | 27       |
| ENSGALT0000 | Small nucleolar RNA SNORD15           | SNORD15   | 0.805033 | 7        |
| ENSGALT0000 | Small nucleolar RNA SNORD16           | SNORD16   | 0.440193 | 3        |
| ENSGALT0000 | Small nucleolar RNA SNORD17           | SNORD17   | 0.616191 | 23.5     |
| ENSGALT0000 | Small nucleolar RNA SNORD18           | SNORD18   | 0.464758 | 0        |
| ENSGALT0000 | Small nucleolar RNA SNORD19           | SNORD19   | 0.464758 | 1        |
| ENSGALT0000 | Small nucleolar RNA SNORD20           | SNORD20   | 0.649519 | 0.5      |
| ENSGALT0000 | Small nucleolar RNA SNORD21           | SNORD21   | 0.31292  | 34.5     |
| ENSGALT0000 | Small nucleolar RNA SNORD24           | SNORD24   | 0.957672 | 7        |
| ENSGALT0000 | Small nucleolar RNA SNORD35           | SNORD35   | 0.475596 | 34       |
| ENSGALT0000 | Small nucleolar RNA SNORD36           | SNORD36   | 0.360463 | 1        |
| ENSGALT0000 | Small nucleolar RNA SNORD37           | SNORD37   | ?        | 0        |
| ENSGALT0000 | Small nucleolar RNA SNORD38           | SNORD38   | 0.594124 | 31.5     |
| ENSGALT0000 | Small nucleolar RNA SNORD43           | SNORD43   | 0.800529 | 5.5      |
| ENSGALT0000 | Small nucleolar RNA SNORD44           | SNORD44   | 0.914923 | 5.5      |
| ENSGALT0000 | Small nucleolar RNA SNORD45           | SNORD45   | 0.967215 | 4        |
| ENSGALT0000 | Small nucleolar RNA SNORD47           | SNORD47   | 0.464758 | 2.11E-06 |
| ENSGALT0000 | Small nucleolar RNA SNORD49           | SNORD49   | 0.740073 | 2        |
| ENSGALT0000 | Small nucleolar RNA SNORD5            | SNORD5    | ?        | 0        |
| ENSGALT0000 | Small nucleolar RNA SNORD50           | SNORD50   | 0.806823 | 1        |
| ENSGALT0000 | Small nucleolar RNA SNORD57           | SNORD57   | 0.683403 | 2.5      |
| ENSGALT0000 | Small nucleolar RNA SNORD58           | SNORD58   | 0.995157 | 7.5      |
| ENSGALT0000 | Small nucleolar RNA SNORD59           | SNORD59   | 0.614288 | 1        |
| ENSGALT0000 | Small nucleolar RNA SNORD61           | SNORD61   | 0.649519 | 1.5      |

|             |                                     |              |          |         |
|-------------|-------------------------------------|--------------|----------|---------|
| ENSGALT0000 | Small nucleolar RNA SNORD62         | SNORD62      | 0.562993 | 0       |
| ENSGALT0000 | Small nucleolar RNA SNORD63         | SNORD63      | 0        | 0       |
| ENSGALT0000 | Small nucleolar RNA SNORD65         | SNORD65      | 0.690534 | 0.5     |
| ENSGALT0000 | Small nucleolar RNA SNORD66         | SNORD66      | 0.760726 | 1       |
| ENSGALT0000 | Small nucleolar RNA SNORD67         | SNORD67      | 0.406098 | 5       |
| ENSGALT0000 | Small nucleolar RNA SNORD69         | SNORD69      | 0.603682 | 0.5     |
| ENSGALT0000 | Small nucleolar RNA SNORD70         | SNORD70      | 0.464758 | 0       |
| ENSGALT0000 | Small nucleolar RNA SNORD71         | SNORD71      | 0.419108 | 4.5     |
| ENSGALT0000 | Small nucleolar RNA SNORD72         | SNORD72      | 0.464758 | 0.5     |
| ENSGALT0000 | Small nucleolar RNA SNORD73         | SNORD73      | 0.539038 | 0       |
| ENSGALT0000 | Small nucleolar RNA SNORD74         | SNORD74      | 0.690314 | 6       |
| ENSGALT0000 | Small nucleolar RNA SNORD75         | SNORD75      | 0.464758 | 0       |
| ENSGALT0000 | Small nucleolar RNA SNORD77         | SNORD77      | ?        | 0       |
| ENSGALT0000 | Small nucleolar RNA SNORD78         | SNORD78      | 0.464758 | 0       |
| ENSGALT0000 | Small nucleolar RNA SNORD79         | SNORD79      | 0.886864 | 2       |
| ENSGALT0000 | Small nucleolar RNA SNORD81         | SNORD81      | 0.754955 | 4.5     |
| ENSGALT0000 | Small nucleolar RNA SNORD82         | SNORD82      | 0.603682 | 1       |
| ENSGALT0000 | Small nucleolar RNA SNORD83         | SNORD83      | 0.63545  | 2.5     |
| ENSGALT0000 | Small nucleolar RNA SNORD87         | SNORD87      | 0.722096 | 1.5     |
| ENSGALT0000 | Small nucleolar RNA SNORD88         | SNORD88      | 0.539038 | 2       |
| ENSGALT0000 | Small nucleolar RNA SNORD89         | SNORD89      | 0.93805  | 21.5    |
| ENSGALT0000 | Small nucleolar RNA SNORD90         | SNORD90      | 0.464758 | 0       |
| ENSGALT0000 | Small nucleolar RNA SNORD91 far     | SNORD91      | 0.22129  | 0.5     |
| ENSGALT0000 | Small Nucleolar RNA SNORD93         | SNORD93      | 0.649519 | 0.5     |
| ENSGALT0000 | Small Nucleolar RNA SNORD94         | SNORD94      | 0.757978 | 10      |
| ENSGALT0000 | Small nucleolar RNA SNORD95         | SNORD95      | ?        | 0       |
| ENSGALT0000 | Small Nucleolar RNA SNORD98         | SNORD98      | 0.464758 | 0       |
| ENSGALT0000 | Small Nucleolar RNA SNORD99         | SNORD99      | 0.880635 | 3.5     |
| ENSGALT0000 | Small nucleolar RNA snR60/Z15/Z16   | snosnR60_Z15 | 0.905659 | 4       |
| ENSGALT0000 | Small nucleolar RNA U109            | snoU109      | 0.968204 | 7.5     |
| ENSGALT0000 | Small nucleolar RNA U13             | snoU13       | 0.424745 | 2.5     |
| ENSGALT0000 | Small nucleolar RNA U2-19           | snoU2_19     | 0.707201 | 81      |
| ENSGALT0000 | Small nucleolar RNA U2-30           | snoU2-30     | 0.667601 | 13      |
| ENSGALT0000 | Small nucleolar RNA U54             | snoU54       | 0.932599 | 1       |
| ENSGALT0000 | Small nucleolar RNA U83B            | snoU83B      | 0.534404 | 7       |
| ENSGALT0000 | Small nucleolar RNA U85             | snoU85       | 0.992797 | 5.5     |
| ENSGALT0000 | Small nucleolar RNA U90             | snoU90       | 0.863407 | 170.5   |
| ENSGALT0000 | Small nucleolar RNA U97             | snoU97       | 0.946291 | 57.5    |
| ENSGALT0000 | Small nucleolar RNA Z17             | snoZ17       | 0.464758 | 0       |
| ENSGALT0000 | Z30 small nucleolar RNA             | snoZ30       | 0.464758 | 1       |
| ENSGALT0000 | Small nucleolar RNA Z39             | snoZ39       | ?        | 0       |
| ENSGALT0000 | Small nucleolar RNA Z40             | snoZ40       | 0.90773  | 1.5     |
| ENSGALT0000 | Small nucleolar RNA snR39B          | snR39B       | 0.839856 | 13.5    |
| ENSGALT0000 | Small nucleolar RNA snR47           | snR47        | 0.675556 | 1.5     |
| ENSGALT0000 | SNF related kinase                  | SNRK         | 0.885603 | 558     |
| ENSGALT0000 | small nuclear ribonucleoprotein 27l | SNRNP27      | 0.76251  | 1436.5  |
| ENSGALT0000 | small nuclear ribonucleoprotein 35l | SNRNP35      | 0.932266 | 204.5   |
| ENSGALT0000 | small nuclear ribonucleoprotein 40l | SNRNP40      | 0.786365 | 2217.53 |
| ENSGALT0000 | small nuclear ribonucleoprotein 48l | SNRNP48      | 0.641321 | 273     |
| ENSGALT0000 | small nuclear ribonucleoprotein pol | SNRPA1       | 0.726311 | 1569.5  |
| ENSGALT0000 | small nuclear ribonucleoprotein pol | SNRPB        | 0.204786 | 5366    |
| ENSGALT0000 | small nuclear ribonucleoprotein pol | SNRPB2       | 0.847403 | 1727.5  |
| ENSGALT0000 | small nuclear ribonucleoprotein pol | SNRPC        | 0.800255 | 2093.5  |
| ENSGALT0000 | small nuclear ribonucleoprotein D1  | SNRPD1       | 0.468736 | 2649    |
| ENSGALT0000 | small nuclear ribonucleoprotein D3  | SNRPD3       | 0.344618 | 5952.5  |
| ENSGALT0000 | small nuclear ribonucleoprotein pol | SNRPE        | 0.349179 | 3140    |

|                                                    |         |          |         |
|----------------------------------------------------|---------|----------|---------|
| ENSGALT0000 small nuclear ribonucleoprotein pol    | SNRPF   | 0.182338 | 3213.5  |
| ENSGALT0000 syntrophin, beta 1 (dystrophin-assc    | SNTB1   | 0.936133 | 3987.59 |
| ENSGALT0000 syntrophin, beta 2 (dystrophin-assc    | SNTB2   | 0.990592 | 110     |
| ENSGALT0000 syntrophin, gamma 1                    | SNTG1   | 0.93885  | 131     |
| ENSGALT0000 syntrophin, gamma 2                    | SNTG2   | 0.983003 | 21.5    |
| ENSGALT0000 sentan, cilia apical structure proteir | SNTN    | 1        | 0.5     |
| ENSGALT0000 snurportin 1                           | SNUPN   | 0.878143 | 822.997 |
| ENSGALT0000 SNW domain containing 1                | SNW1    | 0.911465 | 2055.5  |
| ENSGALT0000 sorting nexin 1                        | SNX1    | 0.87092  | 2518    |
| ENSGALT0000 sorting nexin 10                       | SNX10   | 0.661574 | 253.499 |
| ENSGALT0000 sorting nexin 11                       | SNX11   | 0.823924 | 365.5   |
| ENSGALT0000 sorting nexin 12                       | SNX12   | 0.751482 | 4657    |
| ENSGALT0000 sorting nexin 13                       | SNX13   | 0.984956 | 728.5   |
| ENSGALT0000 sorting nexin 14                       | SNX14   | 0.97036  | 1429.48 |
| ENSGALT0000 sorting nexin 16                       | SNX16   | 0.934033 | 262     |
| ENSGALT0000 sorting nexin 17                       | SNX17   | 0.896011 | 3356.5  |
| ENSGALT0000 sorting nexin 18                       | SNX18   | 0.86275  | 467     |
| ENSGALT0000 sorting nexin 19                       | SNX19   | 0.975248 | 977.5   |
| ENSGALT0000 sorting nexin 2                        | SNX2    | 0.855197 | 1273.5  |
| ENSGALT0000 sorting nexin 20                       | SNX20   | 0.992324 | 86.6988 |
| ENSGALT0000 sorting nexin family member 21         | SNX21   | 0.755269 | 293.422 |
| ENSGALT0000 sorting nexin 22                       | SNX22   | 0.957025 | 43.5    |
| ENSGALT0000 sorting nexin 24                       | SNX24   | 0.946044 | 168     |
| ENSGALT0000 sorting nexin 25                       | SNX25   | 0.952042 | 694.5   |
| ENSGALT0000 sorting nexin family member 27         | SNX27   | 0.828405 | 1945.98 |
| ENSGALT0000 sorting nexin 29                       | SNX29   | 0.98908  | 114.5   |
| ENSGALT0000 sorting nexin 29 pseudogene 2          | SNX29P2 | 0.989142 | 79      |
| ENSGALT0000 sorting nexin 3                        | SNX3    | 0.876209 | 1590.5  |
| ENSGALT0000 sorting nexin family member 30         | SNX30   | 0.922586 | 405.5   |
| ENSGALT0000 sorting nexin 33                       | SNX33   | 0.977864 | 1031.5  |
| ENSGALT0000 sorting nexin 4                        | SNX4    | 0.974457 | 1844.5  |
| ENSGALT0000 sorting nexin 5                        | SNX5    | 0.905773 | 361     |
| ENSGALT0000 sorting nexin 6                        | SNX6    | 0.923205 | 2187.5  |
| ENSGALT0000 sorting nexin 7                        | SNX7    | 0.8492   | 611.5   |
| ENSGALT0000 sorting nexin 8                        | SNX8    | 0.914677 | 194     |
| ENSGALT0000 sorting nexin 9                        | SNX9    | 0.999675 | 1259    |
| ENSGALT0000 sterol O-acyltransferase 1             | SOAT1   | 0.982484 | 925.5   |
| ENSGALT0000 Sine oculis-binding protein homolog    | SOBP    | 0.968751 | 745     |
| ENSGALT0000 suppressor of cytokine signaling 1     | SOCS1   | 0.855035 | 176.5   |
| ENSGALT0000 suppressor of cytokine signalling 1    | SOCS1B  | 0.974068 | 130.5   |
| ENSGALT0000 suppressor of cytokine signaling 2     | SOCS2   | 0.741344 | 356.5   |
| ENSGALT0000 suppressor of cytokine signaling 3     | SOCS3   | 0.950819 | 57      |
| ENSGALT0000 suppressor of cytokine signaling 4     | SOCS4   | 0.856654 | 271     |
| ENSGALT0000 Suppressor of cytokine signaling 5     | SOCS5   | 0.861715 | 942.5   |
| ENSGALT0000 Suppressor of cytokine signaling 6     | SOCS6   | 0.99012  | 385.5   |
| ENSGALT0000 suppressor of cytokine signaling 7     | SOCS7   | 0.918648 | 405.5   |
| ENSGALT0000 superoxide dismutase 1, soluble        | SOD1    | 0.521455 | 3332.49 |
| ENSGALT0000 superoxide dismutase 2, mitochondonc   | SOD2    | 0.709232 | 1176.5  |
| ENSGALT0000 superoxide dismutase 3, extracellu     | SOD3    | 0.90773  | 10      |
| ENSGALT0000 sensory organ homeobox protein S       | SOHO-1  | 0.563069 | 323.489 |
| ENSGALT0000 small optic lobes homolog (Drosopl     | SOLH    | 0.96705  | 1073    |
| ENSGALT0000 SON DNA binding protein                | SON     | 0.983051 | 2079.5  |
| ENSGALT0000 sorbin and SH3 domain containing       | SORBS1  | 0.844406 | 728     |
| ENSGALT0000 sorbin and SH3 domain containing       | SORBS2  | 0.924136 | 1149    |
| ENSGALT0000 sortilin-related VPS10 domain cont     | SORCS1  | 0.931378 | 2760.5  |
| ENSGALT0000 sortilin-related VPS10 domain cont     | SORCS2  | 0.955983 | 299.5   |

|                                                   |          |          |         |
|---------------------------------------------------|----------|----------|---------|
| ENSGALT0000 sortilin-related VPS10 domain cont    | SORCS3   | 0.743698 | 1109    |
| ENSGALT0000 sorbitol dehydrogenase                | SORD     | 0.808501 | 1047.5  |
| ENSGALT0000 sortilin-related receptor, L(DLR clas | SORL1    | 0.995402 | 2464    |
| ENSGALT0000 son of sevenless homolog 1 (Drosoc    | SOS1     | 0.956638 | 1121    |
| ENSGALT0000 son of sevenless homolog 2 (Drosoc    | SOS2     | 0.95628  | 1604.5  |
| ENSGALT0000 sclerostin                            | SOST     | 0.998974 | 10.5    |
| ENSGALT0000 Sclerostin domain-containing protei   | SOSTDC1  | 0.734514 | 147.5   |
| ENSGALT0000 SOUL protein                          | SOUL     | 0.994889 | 197.5   |
| ENSGALT0000 SRY (sex determining region Y)-bo     | SOX10    | 0.967635 | 22405.4 |
| ENSGALT0000 SRY (sex determining region Y)-bo     | SOX11    | 0.851447 | 4230.5  |
| ENSGALT0000 SRY (sex determining region Y)-bo     | SOX13    | 0.97359  | 1638    |
| ENSGALT0000 SRY (sex determining region Y)-bo     | SOX14    | 0.463738 | 41.5    |
| ENSGALT0000 IN                                    | SOX18    | 0.757119 | 69.5    |
| ENSGALT0000 SRY (sex determining region Y)-bo     | SOX2     | 0.820388 | 2013.38 |
| ENSGALT0000 SRY (sex determining region Y)-bo     | SOX3     | 0.412487 | 97.1217 |
| ENSGALT0000 SRY (sex determining region Y)-bo     | SOX30    | 0.293034 | 0       |
| ENSGALT0000 SRY (sex determining region Y)-bo     | SOX5     | 0.992778 | 889.005 |
| ENSGALT0000 SRY (sex determining region Y)-bo     | SOX6     | 0.972971 | 305     |
| ENSGALT0000 SRY (sex determining region Y)-bo     | SOX7     | 0.715424 | 39.5763 |
| ENSGALT0000 SRY (sex determining region Y)-bo     | SOX8     | 0.981654 | 3584.1  |
| ENSGALT0000 SRY (sex determining region Y)-bo     | SOX9     | 0.884032 | 2534.94 |
| ENSGALT0000 Sp1 transcription factor              | SP1      | 0.97491  | 170.185 |
| ENSGALT0000 Sp2 transcription factor              | SP2      | 0.9353   | 739.5   |
| ENSGALT0000 Sp3 transcription factor              | SP3      | 0.973082 | 1853    |
| ENSGALT0000 Sp4 transcription factor              | SP4      | 0.999997 | 1082.5  |
| ENSGALT0000 Sp8 transcription factor              | SP8      | 0.929706 | 163.315 |
| ENSGALT0000 sperm acrosome associated 1           | SPACA1   | 0.740073 | 2       |
| ENSGALT0000 sperm associated antigen 1            | SPAG1    | 0.997488 | 126.5   |
| ENSGALT0000 sperm associated antigen 17           | SPAG17   | 0.942391 | 205     |
| ENSGALT0000 sperm associated antigen 6            | SPAG6    | 0.966787 | 374.5   |
| ENSGALT0000 sperm associated antigen 9            | SPAG9    | 0.967835 | 4593.84 |
| ENSGALT0000 sperm adhesion molecule 1 (PH-2C      | SPAM1    | 0.603682 | 0       |
| ENSGALT0000 secreted protein, acidic, cysteine-ri | SPARC    | 0.974762 | 35791.5 |
| ENSGALT0000 SPARC-like 1 (hevin)                  | SPARCL1  | 0.763245 | 140     |
| ENSGALT0000 spastin                               | SPAST    | 0.951338 | 1197.98 |
| ENSGALT0000 spermatogenesis associated 1          | SPATA1   | 0.997096 | 63      |
| ENSGALT0000 spermatogenesis associated 13         | SPATA13  | 0.981716 | 1636.5  |
| ENSGALT0000 spermatogenesis associated 16         | SPATA16  | 0.464758 | 0       |
| ENSGALT0000 spermatogenesis associated 17         | SPATA17  | 0.987462 | 95      |
| ENSGALT0000 spermatogenesis associated 18 ho      | SPATA18  | 0.914865 | 160     |
| ENSGALT0000 spermatogenesis associated 2          | SPATA2   | 0.945924 | 338.5   |
| ENSGALT0000 spermatogenesis associated 20         | SPATA20  | 0.926886 | 1175.5  |
| ENSGALT0000 spermatogenesis associated 2-like     | SPATA2L  | 0.94551  | 114     |
| ENSGALT0000 spermatogenesis associated 4          | SPATA4   | 0.893851 | 20.2767 |
| ENSGALT0000 spermatogenesis associated 5          | SPATA5   | 0.939983 | 740     |
| ENSGALT0000 spermatogenesis associated 5-like     | SPATA5L1 | 0.924893 | 487     |
| ENSGALT0000 spermatogenesis associated 6          | SPATA6   | 0.987339 | 834.505 |
| ENSGALT0000 spermatogenesis associated 7          | SPATA7   | 0.945625 | 70      |
| ENSGALT0000 spermatogenesis associated, serin     | SPATS2   | 0.881215 | 1376.5  |
| ENSGALT0000 spermatogenesis associated, serin     | SPATS2L  | 0.946183 | 742.5   |
| ENSGALT0000 SPC25, NDC80 kinetochore compl        | SPC25    | 0.830489 | 479     |
| ENSGALT0000 signal peptidase complex subunit 1    | SPCS1    | 0.547962 | 1259.5  |
| ENSGALT0000 signal peptidase complex subunit 2    | SPCS2    | 0.563881 | 1810    |
| ENSGALT0000 signal peptidase complex subunit 3    | SPCS3    | 0.9733   | 847.497 |
| ENSGALT0000 SAM pointed domain containing et      | SPDEF    | 0.882378 | 22.5    |
| ENSGALT0000 speedy homolog A (Xenopus laevis      | SPDYA    | 0.872541 | 38.3657 |

|                                                   |         |          |         |
|---------------------------------------------------|---------|----------|---------|
| ENSGALT0000 sperm antigen with calponin homol     | SPECC1  | 0.941109 | 1682    |
| ENSGALT0000 sperm antigen with calponin homol     | SPECC1L | 0.996185 | 4572.97 |
| ENSGALT0000 spen homolog, transcriptional regul   | SPEN    | 0.982538 | 7012.65 |
| ENSGALT0000 spermatid associated                  | SPERT   | 0.320565 | 0       |
| ENSGALT0000 spastic paraplegia 11 (autosomal r    | SPG11   | 0.979035 | 2651.51 |
| ENSGALT0000 spastic paraplegia 20 (Troyer syndi   | SPG20   | 0.957833 | 190     |
| ENSGALT0000 spastic paraplegia 21 (autosomal r    | SPG21   | 0.970429 | 1243    |
| ENSGALT0000 spastic paraplegia 7 (pure and com    | SPG7    | 0.923391 | 5516.5  |
| ENSGALT0000 sphingosine kinase 1                  | SPHK1   | 0.653776 | 572     |
| ENSGALT0000 SPHK1 interactor, AKAP domain cc      | SPHKAP  | 0.660419 | 9       |
| ENSGALT0000 spleen focus forming virus (SFFV)     | SPI1    | 0.524061 | 26      |
| ENSGALT0000 Spi-C transcription factor (Spi-1/PU  | SPIC    | 0.464758 | 0       |
| ENSGALT0000 spindle and centriole associated pr   | SPICE1  | 0.999684 | 1150.67 |
| ENSGALT0000 serine peptidase inhibitor, Kazal ty  | SPINK1  | ?        | 0       |
| ENSGALT0000 serine peptidase inhibitor, Kazal ty  | SPINK4  | 0.889974 | 31.5    |
| ENSGALT0000 serine peptidase inhibitor, Kazal ty  | SPINK6  | ?        | 0       |
| ENSGALT0000 serine peptidase inhibitor, Kazal ty  | SPINK7  | 0.603682 | 0.5     |
| ENSGALT0000 serine peptidase inhibitor, Kunitz ty | SPINT1  | 0.999667 | 4177.5  |
| ENSGALT0000 spindlin 1                            | SPINZ   | 0.920972 | 1872.51 |
| ENSGALT0000 spire homolog 1 (Drosophila)          | SPIRE1  | 0.78449  | 696.504 |
| ENSGALT0000 spire homolog 2 (Drosophila)          | SPIRE2  | 0.70888  | 2393    |
| ENSGALT0000 spinster homolog 2 (Drosophila)       | SPNS2   | 0.699652 | 26      |
| ENSGALT0000 spinster homolog 3 (Drosophila)       | SPNS3   | 0.665306 | 5       |
| ENSGALT0000 SPO11 meiotic protein covalently b    | SPO11   | 0.934011 | 8       |
| ENSGALT0000 sparco/osteonectin, cwcv and kazal-   | SPOCK1  | 0.869851 | 9499.5  |
| ENSGALT0000 sparco/osteonectin, cwcv and kazal-   | SPOCK3  | 0.780065 | 609     |
| ENSGALT0000 spondin 1, extracellular matrix prot  | SPON1   | 0.803991 | 353     |
| ENSGALT0000 spondin 2, extracellular matrix prot  | SPON2   | 0.915041 | 29.5    |
| ENSGALT0000 speckle-type POZ protein              | SPOP    | 0.94534  | 1326.5  |
| ENSGALT0000 speckle-type POZ protein-like         | SPOPL   | 0.974039 | 329.5   |
| ENSGALT0000 secreted phosphoprotein 1             | SPP1    | 0.211986 | 21      |
| ENSGALT0000 secreted phosphoprotein 2, 24kDa      | SPP2    | 0.708164 | 2       |
| ENSGALT0000 signal peptide peptidase-like 2A      | SPPL2A  | 0.99075  | 4746.37 |
| ENSGALT0000 signal peptide peptidase like 2B      | SPPL2B  | 0.958112 | 2537.5  |
| ENSGALT0000 sepiapterin reductase (7,8-dihydro    | SPR     | 0.857732 | 800.5   |
| ENSGALT0000 sprouty-related, EVH1 domain cont     | SPRED1  | 0.940041 | 545     |
| ENSGALT0000 sprouty-related, EVH1 domain cont     | SPRED2  | 0.981328 | 1042    |
| ENSGALT0000 sprouty homolog 2                     | SPRY2   | 0.978089 | 1922.01 |
| ENSGALT0000 sprouty homolog 3 (Drosophila)        | SPRY3   | 0.873625 | 47      |
| ENSGALT0000 SPRY domain containing 7              | SPRYD7  | 0.851463 | 743.5   |
| ENSGALT0000 splA/ryanodine receptor domain an     | SPSB1   | 0.940052 | 319.5   |
| ENSGALT0000 splA/ryanodine receptor domain an     | SPSB3   | 0.944782 | 1015.5  |
| ENSGALT0000 splA/ryanodine receptor domain an     | SPSB4   | 0.581894 | 89.5    |
| ENSGALT0000 spectrin, alpha, non-erythrocytic 1   | (SPTAN1 | 0.894798 | 16743.8 |
| ENSGALT0000 spectrin, beta, erythrocytic          | SPTB    | 0.895869 | 641     |
| ENSGALT0000 spectrin, beta, non-erythrocytic 1    | SPTBN1  | 0.859378 | 16181.5 |
| ENSGALT0000 spectrin, beta, non-erythrocytic 5    | SPTBN5  | 0.824063 | 43.5    |
| ENSGALT0000 serine palmitoyltransferase, long c   | SPTLC1  | 0.989048 | 676     |
| ENSGALT0000 serine palmitoyltransferase, long c   | SPTLC2  | 0.978039 | 810     |
| ENSGALT0000 serine palmitoyltransferase, long c   | SPTLC3  | 0.808909 | 10      |
| ENSGALT0000 serine palmitoyltransferase, small s  | SPTSSA  | 0.403582 | 312     |
| ENSGALT0000 SPT2, Suppressor of Ty, domain cc     | SPTY2D1 | 0.969853 | 362     |
| ENSGALT0000 squalene monooxygenase                | SQLE    | 0.773375 | 588.5   |
| ENSGALT0000 sulfide quinone reductase-like (yea   | SQRDL   | 0.990994 | 189.5   |
| ENSGALT0000 sequestosome 1                        | SQSTM1  | 0.698533 | 1144    |
| ENSGALT0000 steroid receptor RNA activator 1      | SRA1    | 0.585157 | 1291.5  |

|                                                    |          |          |         |
|----------------------------------------------------|----------|----------|---------|
| ENSGALT0000 S1 RNA binding domain 1                | SRBD1    | 0.970501 | 1007    |
| ENSGALT0000 v-src sarcoma viral oncogene           | SRC      | 0.95528  | 3338.88 |
| ENSGALT0000 SRC kinase signaling inhibitor 1       | SRCIN1   | 0.968266 | 2375    |
| ENSGALT0000 steroid-5-alpha-reductase, alpha p     | SRD5A1   | 0.952154 | 187     |
| ENSGALT0000 steroid-5-alpha-reductase, alpha p     | SRD5A2   | 0.943902 | 37.5    |
| ENSGALT0000 steroid 5 alpha-reductase 3            | SRD5A3   | 0.917533 | 1569.5  |
| ENSGALT0000 sterol regulatory element binding tr   | SREBF2   | 0.887036 | 6191.23 |
| ENSGALT0000 splicing regulatory glutamine/lysine   | SREK1    | 0.963413 | 910     |
| ENSGALT0000 SREK1-interacting protein 1            | SREK1IP1 | 0.84356  | 83.5    |
| ENSGALT0000 serum response factor (c-fos serun     | SRF      | 0.911586 | 1261.5  |
| ENSGALT0000 serum response factor binding prot     | SRFBP1   | 0.944435 | 504     |
| ENSGALT0000 SLIT-ROBO Rho GTPase activatin         | SRGAP1   | 0.991049 | 2674    |
| ENSGALT0000 SLIT-ROBO Rho GTPase activatin         | SRGAP2   | 0.982894 | 2024.5  |
| ENSGALT0000 SLIT-ROBO Rho GTPase activatin         | SRGAP3   | 0.92142  | 4362.74 |
| ENSGALT0000 serglycin                              | SRGN     | 0.395467 | 19.9379 |
| ENSGALT0000 sorcin                                 | SRI      | 0.819749 | 1521.5  |
| ENSGALT0000 sarcalumenin                           | SRL      | 0.887979 | 101.5   |
| ENSGALT0000 spermidine synthase                    | SRM      | 0.866206 | 884.162 |
| ENSGALT0000 src-related kinase lacking C-termin    | SRMS     | 0.985882 | 2.5     |
| ENSGALT0000 signal recognition particle 14kDa (h   | SRP14    | 0.904993 | 2275    |
| ENSGALT0000 signal recognition particle 19kDa      | SRP19    | 0.963125 | 926     |
| ENSGALT0000 signal recognition particle 54kDa      | SRP54    | 0.972734 | 1176.5  |
| ENSGALT0000 signal recognition particle 68kDa      | SRP68    | 0.943974 | 3254    |
| ENSGALT0000 signal recognition particle 72kDa      | SRP72    | 0.926362 | 4418.17 |
| ENSGALT0000 signal recognition particle 9kDa       | SRP9     | 0.947176 | 1770    |
| ENSGALT0000 SFRS protein kinase 1                  | SRPK1    | 0.949277 | 2239.5  |
| ENSGALT0000 SRSF protein kinase 2                  | SRPK2    | 0.984284 | 1327.49 |
| ENSGALT0000 signal recognition particle receptor   | SRPR     | 0.937773 | 6191    |
| ENSGALT0000 sushi-repeat containing protein, X-I   | SRPX     | 0.727199 | 2061    |
| ENSGALT0000 sushi-repeat containing protein, X-I   | SRPX2    | 0.991542 | 182     |
| ENSGALT0000 serine racemase                        | SRR      | 0.876893 | 377.5   |
| ENSGALT0000 SRR1 domain containing                 | SRRD     | 0.654568 | 605.274 |
| ENSGALT0000 serine/arginine repetitive matrix 1    | SRRM1    | 0.986219 | 6825.11 |
| ENSGALT0000 serine/arginine repetitive matrix 3    | SRRM3    | 0.620027 | 119     |
| ENSGALT0000 serine/arginine repetitive matrix 4    | SRRM4    | 0.777686 | 181.5   |
| ENSGALT0000 serine/arginine-rich splicing factor 1 | SRSF1    | 0.947385 | 6824.03 |
| ENSGALT0000 serine/arginine-rich splicing factor 1 | SRSF10   | 0.906197 | 3314    |
| ENSGALT0000 serine/arginine-rich splicing factor 1 | SRSF11   | 0.976183 | 3786.42 |
| ENSGALT0000 serine/arginine-rich splicing factor 3 | SRSF3    | 0.672116 | 9711    |
| ENSGALT0000 serine/arginine-rich splicing factor 4 | SRSF4    | 0.824134 | 1192.49 |
| ENSGALT0000 serine/arginine-rich splicing factor 5 | SRSF5    | 0.917659 | 6961.26 |
| ENSGALT0000 serine/arginine-rich splicing factor 5 | SRSF5A   | 0.93416  | 4201.99 |
| ENSGALT0000 serine/arginine-rich splicing factor 6 | SRSF6    | 0.971687 | 6829    |
| ENSGALT0000 splicing factor, arginine/serine-rich  | SRSF7    | 0.854292 | 4938.58 |
| ENSGALT0000 synovial sarcoma translocation, chr    | SS18     | 0.980144 | 5067.59 |
| ENSGALT0000 synovial sarcoma translocation gen     | SS18L1   | 0.740787 | 179     |
| ENSGALT0000 synovial sarcoma translocation gen     | SS18L2   | 0.345472 | 485.756 |
| ENSGALT0000 somatostatin II                        | SS2      | 0.979998 | 13      |
| ENSGALT0000 Sjogren syndrome antigen B (autoæ      | SSB      | 0.935303 | 1279.87 |
| ENSGALT0000 single-stranded DNA binding protei     | SSBP1    | 0.653945 | 1373    |
| ENSGALT0000 single-stranded DNA binding protei     | SSBP2    | 0.998548 | 587.5   |
| ENSGALT0000 single stranded DNA binding protei     | SSBP3    | 0.913917 | 4645.98 |
| ENSGALT0000 scavenger receptor cysteine rich dc    | SSC5D    | 0.996114 | 75.5    |
| ENSGALT0000 sperm specific antigen 2               | SSFA2    | 0.983792 | 776.5   |
| ENSGALT0000 slingshot homolog 1 (Drosophila)       | SSH1     | 0.978974 | 1004    |
| ENSGALT0000 slingshot homolog 2 (Drosophila)       | SSH2     | 0.995145 | 1677.52 |



|                                                            |          |         |
|------------------------------------------------------------|----------|---------|
| ENSGALT0000 Sjogren syndrome nuclear autoanti SSNA1        | 0.92908  | 190.5   |
| ENSGALT0000 sarcospan (Kras oncogene-associated SSPN       | 0.889233 | 26      |
| ENSGALT0000 SCO-spondin homolog (Bos taurus SSPO           | 0.98833  | 8       |
| ENSGALT0000 signal sequence receptor, alpha SSR1           | 0.948687 | 6685.5  |
| ENSGALT0000 signal sequence receptor, beta (tra SSR2       | 0.932842 | 5071.5  |
| ENSGALT0000 signal sequence receptor, gamma (SSR3          | 0.885742 | 4236.5  |
| ENSGALT0000 structure specific recognition protei SSRP1    | 0.870733 | 6632.29 |
| ENSGALT0000 somatostatin SST                               | 0.362524 | 86.5    |
| ENSGALT0000 somatostatin receptor 1 SSTR1                  | 0.834102 | 108.79  |
| ENSGALT0000 somatostatin receptor 2 SSTR2                  | 0.895232 | 436.498 |
| ENSGALT0000 somatostatin receptor 3 SSTR3                  | 0.722256 | 9.5     |
| ENSGALT0000 somatostatin receptor 4 SSTR4                  | 0.633396 | 116.5   |
| ENSGALT0000 somatostatin receptor 5 SSTR5                  | 0.785948 | 508     |
| ENSGALT0000 SSU72 RNA polymerase II CTD ph SSU72           | 0.802977 | 1193    |
| ENSGALT0000 synovial sarcoma, X breakpoint 2 ir SSX2IP     | 0.913752 | 1015.01 |
| ENSGALT0000 suppression of tumorigenicity 13 (c ST13       | 0.96385  | 4151    |
| ENSGALT0000 suppression of tumorigenicity 14 (c ST14       | 0.975846 | 7757    |
| ENSGALT0000 suppression of tumorigenicity 18 (b ST18       | 0.639159 | 85.5    |
| ENSGALT0000 ST3 beta-galactoside alpha-2,3-sia ST3GAL1     | 0.961972 | 3384.5  |
| ENSGALT0000 ST3 beta-galactoside alpha-2,3-sia ST3GAL2     | 0.930451 | 345.5   |
| ENSGALT0000 ST3 beta-galactoside alpha-2,3-sia ST3GAL3     | 0.929261 | 538.999 |
| ENSGALT0000 ST3 beta-galactoside alpha-2,3-sia ST3GAL4     | 0.86146  | 1439.02 |
| ENSGALT0000 ST3 beta-galactoside alpha-2,3-sia ST3GAL5     | 0.715478 | 125.863 |
| ENSGALT0000 ST3 beta-galactoside alpha-2,3-sia ST3GAL6     | 0.987046 | 1245.5  |
| ENSGALT0000 suppression of tumorigenicity 5 ST5            | 0.94044  | 2347    |
| ENSGALT0000 ST6 beta-galactosamide alpha-2,6- ST6GAL1      | 0.967152 | 720.5   |
| ENSGALT0000 ST6 beta-galactosamide alpha-2,6- ST6GAL2      | 0.98183  | 589.001 |
| ENSGALT0000 ST6 (alpha-N-acetyl-neuraminyl-2,6- ST6GALNAC1 | 0.98635  | 59      |
| ENSGALT0000 ST6 (alpha-N-acetyl-neuraminyl-2,6- ST6GALNAC2 | 0.806232 | 2415.5  |
| ENSGALT0000 ST6 (alpha-N-acetyl-neuraminyl-2,6- ST6GALNAC3 | 0.795695 | 71.5    |
| ENSGALT0000 ST6 (alpha-N-acetyl-neuraminyl-2,6- ST6GALNAC4 | 0.85222  | 407.498 |
| ENSGALT0000 ST6 (alpha-N-acetyl-neuraminyl-2,6- ST6GALNAC5 | 0.965629 | 612.5   |
| ENSGALT0000 ST6 (alpha-N-acetyl-neuraminyl-2,6- ST6GALNAC6 | 0.881826 | 384     |
| ENSGALT0000 suppression of tumorigenicity 7 ST7            | 0.805872 | 270.5   |
| ENSGALT0000 suppression of tumorigenicity 7 like ST7L      | 0.982342 | 1259    |
| ENSGALT0000 ST8 alpha-N-acetyl-neuraminide al ST8SIA1      | 0.738976 | 414.501 |
| ENSGALT0000 ST8 alpha-N-acetyl-neuraminide al ST8SIA2      | 0.71273  | 1810    |
| ENSGALT0000 ST8 alpha-N-acetyl-neuraminide al ST8SIA3      | 0.700112 | 19.8586 |
| ENSGALT0000 ST8 alpha-N-acetyl-neuraminide al ST8SIA4      | 0.923624 | 79      |
| ENSGALT0000 ST8 alpha-N-acetyl-neuraminide al ST8SIA5      | 0.825385 | 144.5   |
| ENSGALT0000 ST8 alpha-N-acetyl-neuraminide al ST8SIA6      | 0.883038 | 325     |
| ENSGALT0000 stabilin 1 STAB1                               | 0.923432 | 500.5   |
| ENSGALT0000 stabilin 2 STAB2                               | 0.845042 | 57.5    |
| ENSGALT0000 SH3 and cysteine rich domain STAC              | 0.898971 | 135.5   |
| ENSGALT0000 stromal antigen 1 STAG1                        | 0.982243 | 1638.53 |
| ENSGALT0000 stromal antigen 2 STAG2                        | 0.997354 | 3010.09 |
| ENSGALT0000 stromal antigen 3 STAG3                        | 0.970911 | 570     |
| ENSGALT0000 signal transducing adaptor molecule STAM       | 0.964425 | 890     |
| ENSGALT0000 signal transducing adaptor molecule STAM2      | 0.959158 | 583.004 |
| ENSGALT0000 STAM binding protein STAMP                     | 0.971983 | 766     |
| ENSGALT0000 STAM binding protein-like 1 STAMBPL1           | 0.882404 | 197     |
| ENSGALT0000 signal transducing adaptor family member STAP1 | 0.853236 | 3       |
| ENSGALT0000 steroidogenic acute regulatory protein STAR    | 0.878686 | 42.5    |
| ENSGALT0000 StAR-related lipid transfer (START) STARD10    | 0.415108 | 672     |
| ENSGALT0000 StAR-related lipid transfer (START) STARD13    | 0.774    | 292.5   |
| ENSGALT0000 StAR-related lipid transfer (START) STARD3     | 0.930205 | 850     |

|                                                   |          |          |         |
|---------------------------------------------------|----------|----------|---------|
| ENSGALT0000 STARD3 N-terminal like                | STARD3NL | 0.957358 | 686.5   |
| ENSGALT0000 StAR-related lipid transfer (START)   | STARD4   | 0.797213 | 430.5   |
| ENSGALT0000 StAR-related lipid transfer (START)   | STARD5   | 0.976172 | 572.5   |
| ENSGALT0000 START domain containing 8             | STARD8   | 0.85711  | 844     |
| ENSGALT0000 StAR-related lipid transfer (START)   | STARD9   | 0.876408 | 195     |
| ENSGALT0000 signal transducer and activator of tr | STAT1    | 0.958868 | 829.655 |
| ENSGALT0000 signal transducer and activator of tr | STAT3    | 0.937278 | 2439.09 |
| ENSGALT0000 signal transducer and activator of tr | STAT4    | 0.784225 | 1.34116 |
| ENSGALT0000 signal transducer and activator of tr | STAT5B   | 0.849857 | 1714.49 |
| ENSGALT0000 staufen, RNA binding protein, homoc   | STAU1    | 0.935812 | 4503.99 |
| ENSGALT0000 staufen, RNA binding protein, homoc   | STAU2    | 0.892778 | 2121.05 |
| ENSGALT0000 stanniocalcin 1                       | STC1     | 0.897786 | 108     |
| ENSGALT0000 stanniocalcin 2                       | STC2     | 0.688395 | 911.507 |
| ENSGALT0000 six transmembrane epithelial antigen  | STEAP2   | 0.993484 | 145.5   |
| ENSGALT0000 STEAP family member 3                 | STEAP3   | 0.752342 | 47.5    |
| ENSGALT0000 STEAP family member 4                 | STEAP4   | 0.22129  | 3       |
| ENSGALT0000 SCL/TAL1 interrupting locus           | STIL     | 0.979254 | 309     |
| ENSGALT0000 stromal interaction molecule 1        | STIM1    | 0.950819 | 1006.5  |
| ENSGALT0000 stromal interaction molecule 2        | STIM2    | 0.999743 | 698.5   |
| ENSGALT0000 serine/threonine kinase 10            | STK10    | 0.746449 | 224.5   |
| ENSGALT0000 serine/threonine kinase 11            | STK11    | 0.960752 | 663     |
| ENSGALT0000 serine/threonine kinase 11 interacti  | STK11IP  | 0.997164 | 646     |
| ENSGALT0000 serine/threonine kinase 16            | STK16    | 0.746708 | 1418.5  |
| ENSGALT0000 serine/threonine kinase 17a           | STK17A   | 0.740368 | 492.5   |
| ENSGALT0000 serine/threonine kinase 17b           | STK17B   | 0.966735 | 218     |
| ENSGALT0000 serine/threonine kinase 24            | STK24    | 0.99802  | 597.003 |
| ENSGALT0000 serine/threonine kinase 25            | STK25    | 0.950352 | 4027.96 |
| ENSGALT0000 serine/threonine kinase 31            | STK31    | 0.96178  | 20.5    |
| ENSGALT0000 serine/threonine kinase 32A           | STK32A   | 0.257292 | 29.5    |
| ENSGALT0000 serine/threonine kinase 32B           | STK32B   | 0.707582 | 15.5    |
| ENSGALT0000 serine/threonine kinase 32C           | STK32C   | 0.79982  | 118     |
| ENSGALT0000 serine/threonine kinase 36, fused h   | STK36    | 0.993445 | 820.006 |
| ENSGALT0000 serine/threonine kinase 38            | STK38    | 0.961361 | 882.5   |
| ENSGALT0000 serine/threonine kinase 38 like       | STK38L   | 0.978536 | 466.501 |
| ENSGALT0000 serine threonine kinase 39            | STK39    | 0.998453 | 775.5   |
| ENSGALT0000 serine/threonine kinase 4             | STK4     | 0.956917 | 3034    |
| ENSGALT0000 serine/threonine kinase 40            | STK40    | 0.933766 | 2259.93 |
| ENSGALT0000 stathmin 1                            | STMN1    | 0.508279 | 34936.8 |
| ENSGALT0000 stathmin-like 2                       | STMN2    | 0.380716 | 1862.01 |
| ENSGALT0000 stathmin-like 3                       | STMN3    | 0.607812 | 1051.99 |
| ENSGALT0000 stathmin-like 4                       | STMN4    | 0.489495 | 329     |
| ENSGALT0000 stomatin                              | STOM     | 0.259518 | 33.5    |
| ENSGALT0000 stomatin (EPB72)-like 1               | STOML1   | 0.760903 | 680.5   |
| ENSGALT0000 stomatin (EPB72)-like 2               | STOML2   | 0.75027  | 1782.5  |
| ENSGALT0000 stomatin (EPB72)-like 3               | STOML3   | 0.808121 | 3.5     |
| ENSGALT0000 storkhead box 1                       | STOX1    | 0.983507 | 1911.5  |
| ENSGALT0000 storkhead box 2                       | STOX2    | 0.983758 | 1002.5  |
| ENSGALT0000 stimulated by retinoic acid gene 6 r  | STRA6    | 0.979016 | 5182.5  |
| ENSGALT0000 stimulated by retinoic acid gene 8 r  | STRA8    | 0.882937 | 5.5     |
| ENSGALT0000 STE20-related kinase adaptor alph     | STRADA   | 0.95267  | 1861.49 |
| ENSGALT0000 STE20-related kinase adaptor beta     | STRADB   | 0.975702 | 570     |
| ENSGALT0000 serine/threonine kinase receptor as   | STRAP    | 0.827036 | 3173    |
| ENSGALT0000 spermatid perinuclear RNA binding     | STRBP    | 0.982539 | 2140    |
| ENSGALT0000 striatin, calmodulin binding protein  | STRN     | 0.972681 | 464.5   |
| ENSGALT0000 striatin, calmodulin binding protein  | STRN3    | 0.968093 | 2064    |
| ENSGALT0000 steroid sulfatase (microsomal), isoz  | STS      | 0.967573 | 124     |

|                                                                   |         |           |         |
|-------------------------------------------------------------------|---------|-----------|---------|
| ENSGALT0000 STT3, subunit of the oligosaccharyl transferase 1     | STT3A   | 0.916433  | 8233    |
| ENSGALT0000 STT3, subunit of the oligosaccharyl transferase 1     | STT3B   | 0.994218  | 8439.02 |
| ENSGALT0000 STIP1 homology and U-box containing protein 1         | STUB1   | 0.882388  | 1886.5  |
| ENSGALT0000 syntaxin 11                                           | STX11   | 0.874724  | 2       |
| ENSGALT0000 syntaxin 12                                           | STX12   | 0.83136   | 956     |
| ENSGALT0000 syntaxin 16                                           | STX16   | 0.942782  | 1549    |
| ENSGALT0000 syntaxin 17                                           | STX17   | 0.943989  | 510     |
| ENSGALT0000 syntaxin 18                                           | STX18   | 0.972884  | 527.5   |
| ENSGALT0000 syntaxin 1A (brain)                                   | STX1A   | 0.683906  | 809.5   |
| ENSGALT0000 syntaxin 2                                            | STX2    | 0.957181  | 608.143 |
| ENSGALT0000 syntaxin 3                                            | STX3    | 0.684107  | 399.5   |
| ENSGALT0000 syntaxin 6                                            | STX6    | 0.932576  | 2732.5  |
| ENSGALT0000 syntaxin 7                                            | STX7    | 0.894145  | 1213.5  |
| ENSGALT0000 syntaxin 8                                            | STX8    | 0.779841  | 1527.5  |
| ENSGALT0000 syntaxin binding protein 1                            | STXBP1  | 0.865456  | 3134.51 |
| ENSGALT0000 syntaxin binding protein 3                            | STXBP3  | 0.99165   | 689.003 |
| ENSGALT0000 syntaxin binding protein 4                            | STXBP4  | 0.941967  | 569.5   |
| ENSGALT0000 syntaxin binding protein 5 (tomosyn)                  | STXBP5  | 0.954287  | 533.5   |
| ENSGALT0000 syntaxin binding protein 5-like                       | STXBP5L | 0.862001  | 281     |
| ENSGALT0000 syntaxin binding protein 6 (amisyn)                   | STXBP6  | 0.894751  | 89      |
| ENSGALT0000 serine/threonine/tyrosine kinase 1                    | STYK1   | 0.995529  | 292.328 |
| ENSGALT0000 serine/threonine/tyrosine interacting protein 1       | STYX    | 0.975311  | 195.5   |
| ENSGALT0000 serine/threonine/tyrosine interacting protein 1       | STYXL1  | 0.677406  | 103     |
| ENSGALT0000 activated RNA polymerase II transcription factor II B | SUB1    | 0.956759  | 5410.96 |
| ENSGALT0000 succinate-CoA ligase, ADP-forming                     | SUCLA2  | 0.941591  | 1175.01 |
| ENSGALT0000 succinate-CoA ligase, alpha subunit                   | SUCLG1  | 0.916652  | 2716.5  |
| ENSGALT0000 succinate-CoA ligase, GDP-forming                     | SUCLG2  | 0.998382  | 1721    |
| ENSGALT0000 succinate receptor 1                                  | SUCNR1  | 0.860955  | 8.5     |
| ENSGALT0000 suppressor of defective silencing 3                   | SUDS3   | 0.970531  | 2072.99 |
| ENSGALT0000 suppressor of fused homolog (Drosophila)              | SUFU    | 0.986194  | 2468.06 |
| ENSGALT0000 SURP and G patch domain containing protein 1          | SUGP1   | 0.9509    | 1202.5  |
| ENSGALT0000 SURP and G patch domain containing protein 2          | SUGP2   | 0.972875  | 2412.5  |
| ENSGALT0000 SGT1, suppressor of G2 allele of SMC4                 | SUGT1   | 0.962851  | 1643    |
| ENSGALT0000 sulfatase 2                                           | SULF2   | 0.985012  | 1969    |
| ENSGALT0000 sulfotransferase family, cytosolic, 1                 | SULT1B1 | 0.763575  | 1088.5  |
| ENSGALT0000 sulfotransferase family, cytosolic, 1                 | SULT1C3 | 0.0332725 | 2       |
| ENSGALT0000 sulfotransferase family 1E, estrogen-inducible        | SULT1E1 | 0.982841  | 419     |
| ENSGALT0000 sulfotransferase family 4A, member 1                  | SULT4A1 | 0.792078  | 565     |
| ENSGALT0000 sulfotransferase family, cytosolic, 6                 | SULT6B1 | 0.770375  | 13.5    |
| ENSGALT0000 sulfatase modifying factor 1                          | SUMF1   | 0.901475  | 962.5   |
| ENSGALT0000 sulfatase modifying factor 2                          | SUMF2   | 0.812494  | 883     |
| ENSGALT0000 SMT3 suppressor of mif two 3 homolog 1                | SUMO1   | 0.944544  | 2508.5  |
| ENSGALT0000 SMT3 suppressor of mif two 3 homolog 2                | SUMO2   | 0.841679  | 3717    |
| ENSGALT0000 SMT3 suppressor of mif two 3 homolog 3                | SUMO3   | 0.604654  | 5562    |
| ENSGALT0000 Sad1 and UNC84 domain containing protein 1            | SUN1    | 0.998302  | 1708    |
| ENSGALT0000 suppressor of Ty 3 homolog (S. cerevisiae)            | SUPT3H  | 0.989721  | 684.997 |
| ENSGALT0000 suppressor of Ty 4 homolog 1 (S. cerevisiae)          | SUPT4H1 | 0.61357   | 2602    |
| ENSGALT0000 suppressor of Ty 5 homolog                            | SUPT5H  | 0.830879  | 5251.57 |
| ENSGALT0000 suppressor of Ty 6 homolog (S. cerevisiae)            | SUPT6H  | 0.956409  | 5007.5  |
| ENSGALT0000 suppressor of Ty 7 (S. cerevisiae)-like 1             | SUPT7L  | 0.969481  | 687.5   |
| ENSGALT0000 suppressor of var1, 3-like 1 (S. cerevisiae)          | SUPV3L1 | 0.90612   | 1049.51 |
| ENSGALT0000 surfeit 1                                             | SURF1   | 0.957392  | 683.5   |
| ENSGALT0000 surfeit 2                                             | SURF2   | 0.652188  | 486     |
| ENSGALT0000 surfeit 4                                             | SURF4   | 0.998162  | 9630.5  |
| ENSGALT0000 surfeit 6                                             | SURF6   | 0.786729  | 746.672 |
| ENSGALT0000 sushi domain containing 1                             | SUSD1   | 0.929036  | 175     |

|                                                                     |          |          |         |
|---------------------------------------------------------------------|----------|----------|---------|
| ENSGALT0000 sushi domain containing 2                               | SUSD2    | 0.79946  | 1.5     |
| ENSGALT0000 sushi domain containing 3                               | SUSD3    | 0.455292 | 118.5   |
| ENSGALT0000 sushi domain containing 4                               | SUSD4    | 0.833363 | 54      |
| ENSGALT0000 sushi domain containing 5                               | SUSD5    | 0.715897 | 114.5   |
| ENSGALT0000 suppressor of variegation 3-9 homolog A                 | SUV39H2  | 0.997266 | 1097    |
| ENSGALT0000 suppressor of variegation 4-20 homolog A                | SUV420H1 | 0.952047 | 836     |
| ENSGALT0000 suppressor of zeste 12 homolog (Drosophila)             | SUZ12    | 0.965926 | 659.5   |
| ENSGALT0000 synaptic vesicle glycoprotein 2B                        | SV2B     | 0.769666 | 114.5   |
| ENSGALT0000 synaptic vesicle glycoprotein 2C                        | SV2C     | 0.983735 | 113.5   |
| ENSGALT0000 sushi, von Willebrand factor type A domain containing 1 | SVEP1    | 0.996228 | 1040.5  |
| ENSGALT0000 supervillin                                             | SVIL     | 0.972568 | 4428.5  |
| ENSGALT0000 SV2 related protein homolog (rat)                       | SVOP     | 0.772266 | 48.4365 |
| ENSGALT0000 SVOP-like                                               | SVOPL    | 0.929798 | 7.5     |
| ENSGALT0000 SWAP switching B-cell complex 70                        | SWAP70   | 0.984786 | 1335.64 |
| ENSGALT0000 SWT1 RNA endoribonuclease homolog 1                     | SWT1     | 0.993874 | 256.5   |
| ENSGALT0000 synapse associated protein 1                            | SYAP1    | 0.965149 | 580     |
| ENSGALT0000 syntabulin (syntaxin-interacting)                       | SYBU     | 0.56945  | 141     |
| ENSGALT0000 syncollin                                               | SYCN     | 0.783372 | 18.5    |
| ENSGALT0000 synaptonemal complex protein 1                          | SYCP1    | 0.876838 | 5.5     |
| ENSGALT0000 synaptonemal complex protein 2-like                     | SYCP2L   | 0.649519 | 0.5     |
| ENSGALT0000 synaptonemal complex protein 3                          | SYCP3    | 0.979294 | 29.5    |
| ENSGALT0000 synapse defective 1, Rho GTPase, interacting            | SYDE2    | 0.898807 | 331.5   |
| ENSGALT0000 SYF2 homolog, RNA splicing factor                       | SYF2     | 0.677816 | 1120.5  |
| ENSGALT0000 spleen tyrosine kinase                                  | SYK      | 0.741352 | 18.5    |
| ENSGALT0000 synapsin I                                              | SYN1     | 0.932986 | 36.6042 |
| ENSGALT0000 synapsin III                                            | SYN3     | 0.761114 | 228     |
| ENSGALT0000 syncoilin, intermediate filament protein                | SYNC     | 0.857541 | 141.5   |
| ENSGALT0000 synaptotagmin binding, cytoplasmic tail                 | SYNCRIP  | 0.873992 | 4569    |
| ENSGALT0000 synapse differentiation inducing 1                      | SYNDIG1  | 0.768754 | 13.5    |
| ENSGALT0000 synapse differentiation inducing 1-like                 | SYNDIG1L | 0.855216 | 73.5    |
| ENSGALT0000 spectrin repeat containing, nuclear                     | SYNE1    | 0.974484 | 834     |
| ENSGALT0000 spectrin repeat containing, nuclear                     | SYNE2    | 0.984136 | 7883.5  |
| ENSGALT0000 synaptogyrin 3                                          | SYNGR3   | 0.953259 | 384.5   |
| ENSGALT0000 synaptojanin 1                                          | SYNJ1    | 0.933971 | 841.5   |
| ENSGALT0000 synaptojanin 2                                          | SYNJ2    | 0.810734 | 1524.5  |
| ENSGALT0000 synaptojanin 2 binding protein                          | SYNJ2BP  | 0.851042 | 113     |
| ENSGALT0000 desmuslin                                               | SYNM     | 0.90532  | 1096.51 |
| ENSGALT0000 synaptopodin 2                                          | SYNPO2   | 0.703569 | 185     |
| ENSGALT0000 synaptopodin 2-like                                     | SYNPO2L  | 0.568647 | 1       |
| ENSGALT0000 synaptoporin                                            | SYNPR    | 0.609863 | 458.999 |
| ENSGALT0000 synergin, gamma                                         | SYNRG    | 0.965032 | 1952.96 |
| ENSGALT0000 synaptophysin-like 1                                    | SYPL1    | 0.628211 | 2.5     |
| ENSGALT0000 SYS1 Golgi-localized integral membrane protein          | SYS1     | 0.8819   | 904.5   |
| ENSGALT0000 synaptotagmin I                                         | SYT1     | 0.733764 | 238.5   |
| ENSGALT0000 synaptotagmin X                                         | SYT10    | 0.632972 | 58.5    |
| ENSGALT0000 synaptotagmin XI                                        | SYT11    | 0.899765 | 1866    |
| ENSGALT0000 synaptotagmin XII                                       | SYT12    | 0.883663 | 133     |
| ENSGALT0000 synaptotagmin XIII                                      | SYT13    | 0.929985 | 23      |
| ENSGALT0000 synaptotagmin XIV                                       | SYT14    | 0.897662 | 79.5    |
| ENSGALT0000 synaptotagmin XV                                        | SYT15    | 0.988235 | 140.5   |
| ENSGALT0000 synaptotagmin XVI                                       | SYT16    | 0.950117 | 533.5   |
| ENSGALT0000 synaptotagmin XVII                                      | SYT17    | 0.879738 | 138.5   |
| ENSGALT0000 synaptotagmin IV                                        | SYT4     | 0.813559 | 82      |
| ENSGALT0000 synaptotagmin VI                                        | SYT6     | 0.914117 | 59      |
| ENSGALT0000 synaptotagmin VII                                       | SYT7     | 0.674435 | 624.498 |
| ENSGALT0000 synaptotagmin VIII                                      | SYT8     | 0.777575 | 170.5   |

|                                                                                    |         |          |         |
|------------------------------------------------------------------------------------|---------|----------|---------|
| ENSGALT0000 synaptotagmin IX                                                       | SYT9    | 0.994941 | 365.5   |
| ENSGALT0000 synaptotagmin-like 2                                                   | SYTL2   | 0.9698   | 341.501 |
| ENSGALT0000 synaptotagmin-like 3                                                   | SYTL3   | 0.954645 | 29.5    |
| ENSGALT0000 synaptotagmin-like 4                                                   | SYTL4   | 0.987889 | 486.5   |
| ENSGALT0000 synaptotagmin-like 5                                                   | SYTL5   | 0.879907 | 12      |
| ENSGALT0000 seizure threshold 2 homolog (mouse)                                    | SZT2    | 0.976626 | 191.5   |
| ENSGALT0000 T, brachyury homolog (mouse)                                           | T       | 0.854495 | 158     |
| ENSGALT0000 trace amine associated receptor 5                                      | TAAR5   | ?        | 0       |
| ENSGALT0000 TGF-beta activated kinase 1/MAP3K1                                     | TAB1    | 0.936438 | 1755    |
| ENSGALT0000 TGF-beta activated kinase 1/MAP3K2                                     | TAB2    | 0.989302 | 2109    |
| ENSGALT0000 TGF-beta activated kinase 1/MAP3K3                                     | TAB3    | 0.94744  | 1008    |
| ENSGALT0000 tachykinin, precursor 1                                                | TAC1    | 0.298589 | 184.5   |
| ENSGALT0000 transforming, acidic coiled-coil containing 1                          | TACC1   | 0.951964 | 598.999 |
| ENSGALT0000 transforming, acidic coiled-coil containing 2                          | TACC2   | 0.928433 | 1495    |
| ENSGALT0000 transforming, acidic coiled-coil containing 3                          | TACC3   | 0.968789 | 2345.5  |
| ENSGALT0000 tachykinin receptor 1                                                  | TACR1   | 0.973655 | 280     |
| ENSGALT0000 tachykinin receptor 2                                                  | TACR2   | 0.840911 | 1.5     |
| ENSGALT0000 tachykinin receptor 3                                                  | TACR3   | 0.243555 | 9.5     |
| ENSGALT0000 tumor-associated calcium signal transducer 2                           | TACSTD2 | 0.985995 | 6.5     |
| ENSGALT0000 transcriptional adaptor 1                                              | TADA1   | 0.981757 | 1088.5  |
| ENSGALT0000 transcriptional adaptor 2A                                             | TADA2A  | 0.951741 | 1163    |
| ENSGALT0000 transcriptional adaptor 2B                                             | TADA2B  | 0.857975 | 102.5   |
| ENSGALT0000 transcriptional adaptor 3                                              | TADA3   | 0.834033 | 2009    |
| ENSGALT0000 TAF1 RNA polymerase II, TATA box binding protein associated factor 1   | TAF1    | 0.947096 | 6112.01 |
| ENSGALT0000 TAF11 RNA polymerase II, TATA box binding protein associated factor 11 | TAF11   | 0.833889 | 1347.5  |
| ENSGALT0000 TAF12 RNA polymerase II, TATA box binding protein associated factor 12 | TAF12   | 0.870842 | 1034.98 |
| ENSGALT0000 TAF13 RNA polymerase II, TATA box binding protein associated factor 13 | TAF13   | 0.641941 | 1237    |
| ENSGALT0000 TAF15 RNA polymerase II, TATA box binding protein associated factor 15 | TAF15   | 0.8176   | 4358    |
| ENSGALT0000 TATA box binding protein (TBP)-associated factor 1A                    | TAF1A   | 0.911685 | 469     |
| ENSGALT0000 TATA box binding protein (TBP)-associated factor 1B                    | TAF1B   | 0.971337 | 400     |
| ENSGALT0000 TATA box binding protein (TBP)-associated factor 1D                    | TAF1D   | 0.9997   | 800.506 |
| ENSGALT0000 TAF2 RNA polymerase II, TATA box binding protein associated factor 2   | TAF2    | 0.955033 | 1484    |
| ENSGALT0000 TAF3 RNA polymerase II, TATA box binding protein associated factor 3   | TAF3    | 0.854357 | 2623.47 |
| ENSGALT0000 TAF4 RNA polymerase II, TATA box binding protein associated factor 4   | TAF4    | 0.954042 | 465.999 |
| ENSGALT0000 TAF4b RNA polymerase II, TATA box binding protein associated factor 4b | TAF4B   | 0.872701 | 124.5   |
| ENSGALT0000 TAF5 RNA polymerase II, TATA box binding protein associated factor 5   | TAF5    | 0.944154 | 1056    |
| ENSGALT0000 TAF5-like RNA polymerase II, p300 associated factor 5L                 | TAF5L   | 0.970532 | 888.5   |
| ENSGALT0000 TAF7 RNA polymerase II, TATA box binding protein associated factor 7   | TAF7    | 0.857131 | 1724.5  |
| ENSGALT0000 TAF8 RNA polymerase II, TATA box binding protein associated factor 8   | TAF8    | 0.973616 | 671.5   |
| ENSGALT0000 TAF9 RNA polymerase II, TATA box binding protein associated factor 9   | TAF9    | 0.741729 | 1013    |
| ENSGALT0000 T-cell activation RhoGTPase activator 1                                | TAGAP   | 0.567223 | 8.5     |
| ENSGALT0000 tagalin                                                                | TAGLN   | 0.72724  | 9       |
| ENSGALT0000 tagalin 3                                                              | TAGLN3  | 0.231997 | 1418    |
| ENSGALT0000 TAL1                                                                   | TAL1    | 0.735405 | 16.5    |
| ENSGALT0000 T-cell acute lymphocytic leukemia 2                                    | TAL2    | 0.649519 | 5       |
| ENSGALT0000 transaldolase 1                                                        | TALDO1  | 0.831176 | 1552    |
| ENSGALT0000 TAM41, mitochondrial translocator                                      | TAMM41  | 0.994359 | 409     |
| ENSGALT0000 tetratricopeptide repeat, ankyrin repeat domain 1                      | TANC1   | 0.999529 | 1820.06 |
| ENSGALT0000 tetratricopeptide repeat, ankyrin repeat domain 2                      | TANC2   | 0.949579 | 1350    |
| ENSGALT0000 TRAF family member-associated NEMO 1                                   | TANK    | 0.99979  | 576     |
| ENSGALT0000 TAO kinase 1                                                           | TAOK1   | 0.961223 | 2389.97 |
| ENSGALT0000 TAO kinase 3                                                           | TAOK3   | 0.917316 | 1316    |
| ENSGALT0000 transporter 1, ATP-binding cassette subfamily A member 1               | TAP1    | 0.81298  | 75.5    |
| ENSGALT0000 transporter 2, ATP-binding cassette subfamily A member 2               | TAP2    | 0.569109 | 65      |
| ENSGALT0000 TAP binding protein (tapasin)                                          | TAPBP   | 0.911747 | 657.5   |
| ENSGALT0000 TAP binding protein-like                                               | TAPBPL  | 0.97231  | 13.5    |

|                                                   |          |          |         |
|---------------------------------------------------|----------|----------|---------|
| ENSGALT0000 transmembrane anterior posterior t    | TAPT1    | 0.958295 | 567.997 |
| ENSGALT0000 Tar (HIV-1) RNA binding protein 1     | TARBP1   | 0.987136 | 746.5   |
| ENSGALT0000 TAR DNA binding protein               | TARDBP   | 0.956297 | 4578.5  |
| ENSGALT0000 threonyl-tRNA synthetase              | TARS     | 0.913078 | 1608.99 |
| ENSGALT0000 threonyl-tRNA synthetase-like 2       | TARSL2   | 0.923933 | 925.5   |
| ENSGALT0000 taste receptor, type 1, member 1      | TAS1R1   | 0.955186 | 229.5   |
| ENSGALT0000 taste receptor, type 1, member 3      | TAS1R3   | 0.766328 | 10      |
| ENSGALT0000 taste receptor, type 2, member 7      | TAS2R7   | 0.524047 | 2       |
| ENSGALT0000 taspase, threonine aspartase, 1       | TASP1    | 0.999985 | 228.5   |
| ENSGALT0000 tyrosine aminotransferase             | TAT      | 0.189835 | 5.5     |
| ENSGALT0000 TatD DNase domain containing 1        | TATDN1   | 0.942217 | 512     |
| ENSGALT0000 TatD DNase domain containing 3        | TATDN3   | 0.685148 | 510     |
| ENSGALT0000 Tax1 (human T-cell leukemia virus 1)  | TAX1BP1  | 0.923596 | 3038.96 |
| ENSGALT0000 Tax1 (human T-cell leukemia virus 1)  | TAX1BP3  | 0.829286 | 2270    |
| ENSGALT0000 TBC1 (tre-2/USP6, BUB2, cdc16) c      | TBC1D1   | 0.98583  | 1338.5  |
| ENSGALT0000 TBC1 domain family, member 10A        | TBC1D10A | 0.860755 | 2145.5  |
| ENSGALT0000 TBC1 domain family, member 12         | TBC1D12  | 0.941109 | 744.995 |
| ENSGALT0000 TBC1 domain family, member 13         | TBC1D13  | 0.950914 | 931     |
| ENSGALT0000 TBC1 domain family, member 14         | TBC1D14  | 0.986084 | 922     |
| ENSGALT0000 TBC1 domain family, member 15         | TBC1D15  | 0.991476 | 1136    |
| ENSGALT0000 TBC1 domain family, member 16         | TBC1D16  | 0.953642 | 1636    |
| ENSGALT0000 TBC1 domain family, member 19         | TBC1D19  | 0.931116 | 776.5   |
| ENSGALT0000 TBC1 domain family, member 2          | TBC1D2   | 0.97607  | 350.5   |
| ENSGALT0000 TBC1 domain family, member 20         | TBC1D20  | 0.971214 | 479     |
| ENSGALT0000 TBC1 domain family, member 22A        | TBC1D22A | 0.954132 | 913.998 |
| ENSGALT0000 TBC1 domain family, member 22B        | TBC1D22B | 0.966939 | 1724.5  |
| ENSGALT0000 TBC1 domain family, member 23         | TBC1D23  | 0.968    | 1167.5  |
| ENSGALT0000 TBC1 domain family, member 2B         | TBC1D2B  | 0.960527 | 614.5   |
| ENSGALT0000 TBC1 domain family, member 30         | TBC1D30  | 0.8717   | 554.5   |
| ENSGALT0000 TBC1 domain family, member 4          | TBC1D4   | 0.979512 | 526     |
| ENSGALT0000 TBC1 domain family, member 5          | TBC1D5   | 0.965893 | 923.5   |
| ENSGALT0000 TBC1 domain family, member 7          | TBC1D7   | 0.911206 | 541     |
| ENSGALT0000 TBC1 domain family, member 8 (wi      | TBC1D8   | 0.999975 | 882     |
| ENSGALT0000 TBC1 domain family, member 8B (\      | TBC1D8B  | 0.980782 | 622     |
| ENSGALT0000 TBC1 domain family, member 9 (wi      | TBC1D9   | 0.895121 | 3666.77 |
| ENSGALT0000 TBC1 domain family, member 9B (\      | TBC1D9B  | 0.894519 | 3139.23 |
| ENSGALT0000 tubulin folding cofactor A            | TBCA     | 0.716392 | 725.5   |
| ENSGALT0000 tubulin folding cofactor B            | TBCB     | 0.739847 | 621.5   |
| ENSGALT0000 beta-tubulin cofactor C               | TBCC     | 0.547035 | 712.876 |
| ENSGALT0000 TBCC domain containing 1              | TBCCD1   | 0.884276 | 718.367 |
| ENSGALT0000 tubulin folding cofactor D            | TBCD     | 0.928512 | 2920.51 |
| ENSGALT0000 tubulin folding cofactor E            | TBCE     | 0.91696  | 593.5   |
| ENSGALT0000 tubulin folding cofactor E-like       | TBCEL    | 0.997959 | 671     |
| ENSGALT0000 TBC1 domain containing kinase         | TBCK     | 0.972399 | 964.5   |
| ENSGALT0000 TANK-binding kinase 1                 | TBK1     | 0.99924  | 667.5   |
| ENSGALT0000 transducin (beta)-like 1X-linked      | TBL1X    | 0.962867 | 1835    |
| ENSGALT0000 transducin (beta)-like 1 X-linked rec | TBL1XR1  | 0.99437  | 1712    |
| ENSGALT0000 transducin (beta)-like 3              | TBL3     | 0.862532 | 2361    |
| ENSGALT0000 TATA box binding protein              | TBP      | 0.908695 | 681.004 |
| ENSGALT0000 TBP-like 1                            | TBPL1    | 0.960567 | 332     |
| ENSGALT0000 TATA box binding protein like 2       | TBPL2    | 0.244778 | 0       |
| ENSGALT0000 T-box, brain, 1                       | TBR1     | 0.822838 | 4       |
| ENSGALT0000 transforming growth factor beta reg   | TBRG4    | 0.837303 | 3231.5  |
| ENSGALT0000 T-box 10                              | TBX10    | 0.956023 | 12.5    |
| ENSGALT0000 T-box 15                              | TBX15    | 0.805714 | 129     |
| ENSGALT0000 T-box 18                              | TBX18    | 0.979453 | 1545.52 |

|                                                            |          |          |         |
|------------------------------------------------------------|----------|----------|---------|
| ENSGALT0000 T-box 19                                       | TBX19    | 0.923222 | 11      |
| ENSGALT0000 T-box 2                                        | TBX2     | 0.731487 | 656.496 |
| ENSGALT0000 T-box 20                                       | TBX20    | 0.869886 | 21      |
| ENSGALT0000 T-box 22                                       | TBX22    | 0.61458  | 5       |
| ENSGALT0000 T-box 3                                        | TBX3     | 0.875731 | 2711.48 |
| ENSGALT0000 T-box 4                                        | TBX4     | 0.771868 | 4       |
| ENSGALT0000 T-box 5                                        | TBX5     | 0.603682 | 0       |
| ENSGALT0000 T-box 6                                        | TBX6     | 0.829366 | 18      |
| ENSGALT0000 tandem C2 domains, nuclear                     | TC2N     | 0.881716 | 262     |
| ENSGALT0000 transcription elongation factor A (SI TCEA1    |          | 0.983594 | 1187.99 |
| ENSGALT0000 transcription elongation factor A (SI TCEA2    |          | 0.890684 | 2054    |
| ENSGALT0000 transcription elongation factor A (SI TCEANC   |          | 0.978796 | 140.5   |
| ENSGALT0000 transcription elongation factor A (SI TCEANC2  |          | 0.798104 | 415     |
| ENSGALT0000 transcription elongation factor B (SI TCEB1    |          | 0.9201   | 1585.5  |
| ENSGALT0000 transcription elongation factor B (SI TCEB3    |          | 0.914785 | 875.5   |
| ENSGALT0000 transcription elongation regulator 1 TCERG1    |          | 0.957786 | 3212    |
| ENSGALT0000 transcription elongation regulator 1 TCERG1L   |          | 0.823937 | 104.5   |
| ENSGALT0000 transcription factor 12                        | TCF12    | 0.894893 | 6565.64 |
| ENSGALT0000 transcription factor 20 (AR1)                  | TCF20    | 0.977859 | 3489.5  |
| ENSGALT0000 transcription factor 21                        | TCF21    | 0.339868 | 5.5     |
| ENSGALT0000 transcription factor 25 (basic helix-l TCF25   |          | 0.917255 | 2679.5  |
| ENSGALT0000 transcription factor 3 (E2A immunof TCF3       |          | 0.975722 | 6733.89 |
| ENSGALT0000 transcription factor 7 (T-cell specific TCF7   |          | 0.551035 | 85      |
| ENSGALT0000 transcription factor 7-like 2 (T-cell s TCF7L2 |          | 0.938556 | 1283.5  |
| ENSGALT0000 transcription factor-like 5 (basic hel TCFL5   |          | 0.981824 | 111.5   |
| ENSGALT0000 T-cell, immune regulator 1, ATPase TCIRG1      |          | 0.968764 | 882.5   |
| ENSGALT0000 transcobalamin II                              | TCN2     | 0.80112  | 867     |
| ENSGALT0000 Treacher Collins-Franceschetti syn TCOF1       |          | 0.902558 | 2806.82 |
| ENSGALT0000 t-complex 1                                    | TCP1     | 0.829557 | 8120.82 |
| ENSGALT0000 t-complex 11 homolog (mouse)                   | TCP11    | 0.980158 | 27      |
| ENSGALT0000 t-complex 11 (mouse)-like 1                    | TCP11L1  | 0.984684 | 526.5   |
| ENSGALT0000 t-complex 11 (mouse)-like 2                    | TCP11L2  | 0.99375  | 1164.99 |
| ENSGALT0000 t-complex-associated-testis-expres TCTE1       |          | 0.87867  | 214.5   |
| ENSGALT0000 t-complex-associated-testis-expres TCTE3       |          | 0.891927 | 24.5    |
| ENSGALT0000 Tctex1 domain containing 1                     | TCTEX1D1 | 0.858269 | 141     |
| ENSGALT0000 tectonic family member 1                       | TCTN1    | 0.992466 | 462.975 |
| ENSGALT0000 tectonic family member 2                       | TCTN2    | 0.993802 | 2003    |
| ENSGALT0000 tectonic family member 3                       | TCTN3    | 0.998865 | 1893    |
| ENSGALT0000 thymine-DNA glycosylase                        | TDG      | 0.939088 | 3544.5  |
| ENSGALT0000 L-threonine dehydrogenase                      | TDH      | 0.596083 | 184.5   |
| ENSGALT0000 tryptophan 2,3-dioxygenase                     | TDO2     | 0.972073 | 15.5    |
| ENSGALT0000 tyrosyl-DNA phosphodiesterase 1                | TDP1     | 0.96941  | 1149.5  |
| ENSGALT0000 tyrosyl-DNA phosphodiesterase 2                | TDP2     | 0.83546  | 734.5   |
| ENSGALT0000 tudor domain containing 1                      | TDRD1    | 0.790606 | 44.5    |
| ENSGALT0000 tudor domain containing 12                     | TDRD12   | 0.814645 | 4       |
| ENSGALT0000 tudor domain containing 3                      | TDRD3    | 0.960887 | 1004    |
| ENSGALT0000 tudor domain containing 6                      | TDRD6    | 0.920328 | 7.5     |
| ENSGALT0000 Tudor domain-containing protein 7              | TDRD7    | 0.995602 | 275.5   |
| ENSGALT0000 tudor domain containing 9                      | TDRD9    | 0.967171 | 51      |
| ENSGALT0000 TDRD9 antisense RNA 1 (non-prot TDRD9-AS1      |          | 0.79794  | 9       |
| ENSGALT0000 tudor and KH domain containing                 | TDRKH    | 0.553145 | 43.5    |
| ENSGALT0000 TEA domain family member 1 (SV4 TEAD1          |          | 0.977438 | 974.5   |
| ENSGALT0000 TEA domain family member 3                     | TEAD3    | 0.983778 | 662.995 |
| ENSGALT0000 TEA domain family member 4                     | TEAD4    | 0.994218 | 1438.01 |
| ENSGALT0000 tec protein tyrosine kinase                    | TEC      | 0.99257  | 114     |
| ENSGALT0000 tectonin beta-propeller repeat contæ TECPR1    |          | 0.968856 | 838     |

|                                                   |                 |           |         |
|---------------------------------------------------|-----------------|-----------|---------|
| ENSGALT0000 tectonin beta-propeller repeat cont   | TECPR2          | 0.992066  | 1502    |
| ENSGALT0000 trans-2,3-enoyl-CoA reductase         | TECR            | 0.98836   | 147     |
| ENSGALT0000 trans-2,3-enoyl-CoA reductase-like    | TECRL           | 0.603682  | 0       |
| ENSGALT0000 tectorin alpha                        | TECTA           | 0.953813  | 43295.4 |
| ENSGALT0000 tectorin beta                         | TECTB           | 0.328934  | 924     |
| ENSGALT0000 thyrotrophic embryonic factor         | TEF             | 0.981892  | 897.497 |
| ENSGALT0000 TEK tyrosine kinase, endothelial      | TEK             | 0.962012  | 153     |
| ENSGALT0000 tektin 1                              | TEKT1           | 0.949642  | 188.5   |
| ENSGALT0000 tektin 2 (testicular)                 | TEKT2           | 0.624919  | 17      |
| ENSGALT0000 tektin 3                              | TEKT3           | 0.649519  | 1.5     |
| ENSGALT0000 tektin 4                              | TEKT4           | 0.91258   | 76      |
| ENSGALT0000 tektin 5                              | TEKT5           | 0.738242  | 2.5     |
| ENSGALT0000 TEL2, telomere maintenance 2, ho      | TELO2           | 0.965471  | 672     |
| ENSGALT0000 Vertebrate telomerase RNA             | Telomerase-vert | 0.464758  | 0       |
| ENSGALT0000 TEN1 telomerase capping complex       | TEN1            | 0.78024   | 56      |
| ENSGALT0000 TENP protein                          | TENP            | 0.0167155 | 1       |
| ENSGALT0000 telomeric repeat binding factor (NIM  | TERF1           | 0.964402  | 821.177 |
| ENSGALT0000 telomeric repeat binding factor 2     | TERF2           | 0.930725  | 1427    |
| ENSGALT0000 telomeric repeat binding factor 2, in | TERF2IP         | 0.652799  | 813.529 |
| ENSGALT0000 telomerase reverse transcriptase      | TERT            | 0.929483  | 290.001 |
| ENSGALT0000 testis derived transcript (3 LIM dom  | TES             | 0.684217  | 2365.52 |
| ENSGALT0000 tescalcin                             | TESC            | 0.725321  | 1015.5  |
| ENSGALT0000 testis-specific kinase 2              | TESK2           | 0.97266   | 267.5   |
| ENSGALT0000 tet oncogene 1                        | TET1            | 0.964732  | 843     |
| ENSGALT0000 tet methylcytosine dioxygenase 2      | TET2            | 0.96482   | 830.5   |
| ENSGALT0000 tet methylcytosine dioxygenase 3      | TET3            | 0.98261   | 2981.5  |
| ENSGALT0000 testis expressed 10                   | TEX10           | 0.964083  | 2439.82 |
| ENSGALT0000 testis expressed 11                   | TEX11           | 0.957106  | 318     |
| ENSGALT0000 testis expressed 14                   | TEX14           | 0.980695  | 42      |
| ENSGALT0000 testis expressed 2                    | TEX2            | 0.966109  | 594     |
| ENSGALT0000 testis expressed 264                  | TEX264          | 0.763192  | 1753.5  |
| ENSGALT0000 testis expressed 30                   | TEX30           | 0.96971   | 102.5   |
| ENSGALT0000 testis expressed 9                    | TEX9            | 0.993646  | 181.5   |
| ENSGALT0000 transcription factor A, mitochondrial | TFAM            | 0.823092  | 1805.5  |
| ENSGALT0000 transcription factor AP-2 alpha (acti | TFAP2A          | 0.584805  | 136     |
| ENSGALT0000 transcription factor AP-2 beta (activ | TFAP2B          | 0.586414  | 8       |
| ENSGALT0000 transcription factor AP-2 gamma (a    | TFAP2C          | 0.994957  | 47.5    |
| ENSGALT0000 transcription factor AP-2 delta (acti | TFAP2D          | ?         | 0       |
| ENSGALT0000 transcription factor AP-2 epsilon (a  | TFAP2E          | 0.853815  | 1       |
| ENSGALT0000 transcription factor B1, mitochondri  | TFB1M           | 0.980412  | 360     |
| ENSGALT0000 transcription factor B2, mitochondri  | TFB2M           | 0.973398  | 459.5   |
| ENSGALT0000 transcription factor CP2              | TFCP2           | 0.972852  | 2716.48 |
| ENSGALT0000 transcription factor CP2-like 1       | TFCP2L1         | 0.861741  | 62.0001 |
| ENSGALT0000 transcription factor Dp-1             | TFDP1           | 0.971475  | 1104    |
| ENSGALT0000 transcription factor Dp-2 (E2F dime   | TFDP2           | 0.960016  | 482.5   |
| ENSGALT0000 transcription factor EB               | TFEB            | 0.990054  | 837.5   |
| ENSGALT0000 transcription factor EC               | TFEC            | 0.604528  | 0.5     |
| ENSGALT0000 trefoil factor 2                      | TFF2            | 0.898356  | 0.5     |
| ENSGALT0000 TRK-fused gene                        | TFG             | 0.750575  | 5248.5  |
| ENSGALT0000 tuftelin interacting protein 11       | TFIP11          | 0.946405  | 2046.73 |
| ENSGALT0000 tissue factor pathway inhibitor (lipo | TFPI            | 0.994113  | 120     |
| ENSGALT0000 tissue factor pathway inhibitor 2     | TFPI2           | 0.740748  | 106     |
| ENSGALT0000 transferrin receptor (p90, CD71)      | TFRC            | 0.971676  | 3062.93 |
| ENSGALT0000 TDP-glucose 4,6-dehydratase           | TGDS            | 0.968258  | 334     |
| ENSGALT0000 transforming growth factor, alpha     | TGFA            | 0.672357  | 29      |
| ENSGALT0000 transforming growth factor, beta 2    | TGFB2           | 0.958207  | 4168.9  |



|                                                  |          |          |         |
|--------------------------------------------------|----------|----------|---------|
| ENSGALT0000 transforming growth factor, beta 3   | TGFB3    | 0.975964 | 2028.96 |
| ENSGALT0000 transforming growth factor, beta-inc | TGFBI    | 0.962266 | 4588.5  |
| ENSGALT0000 transforming growth factor, beta rec | TGFBR1   | 0.990085 | 1780.5  |
| ENSGALT0000 transforming growth factor, beta rec | TGFBR2   | 0.917746 | 555.998 |
| ENSGALT0000 transforming growth factor, beta rec | TGFBR3   | 0.985637 | 528     |
| ENSGALT0000 transforming growth factor, beta rec | TGFBRAP1 | 0.985653 | 293     |
| ENSGALT0000 TGFB-induced factor homeobox 1       | TGIF1    | 0.996655 | 1472    |
| ENSGALT0000 TGFB-induced factor homeobox 2       | TGIF2    | 0.887972 | 731     |
| ENSGALT0000 transglutaminase 2 (C polypeptide,   | TGM2     | 0.570722 | 74.5    |
| ENSGALT0000 transglutaminase 3 (E polypeptide,   | TGM3     | 0.998257 | 38.5    |
| ENSGALT0000 transglutaminase 4 (prostate)        | TGM4     | 0.392405 | 2       |
| ENSGALT0000 transglutaminase 6                   | TGM6     | 0.993324 | 34.5    |
| ENSGALT0000 trans-golgi network protein 2        | TGOLN2   | 0.947616 | 769     |
| ENSGALT0000 trimethylguanosine synthase 1        | TGS1     | 0.927747 | 1115.01 |
| ENSGALT0000 tyrosine hydroxylase                 | TH       | 0.631223 | 0       |
| ENSGALT0000 TH1-like (Drosophila)                | TH1L     | 0.954949 | 2235    |
| ENSGALT0000 thyroid adenoma associated           | THADA    | 0.988926 | 1176.5  |
| ENSGALT0000 THAP domain containing, apoptosi     | THAP1    | 0.950868 | 92.5    |
| ENSGALT0000 THAP domain containing 11            | THAP11   | 0.846286 | 269.5   |
| ENSGALT0000 THAP domain containing 4             | THAP4    | 0.895394 | 1068    |
| ENSGALT0000 THAP domain containing 5             | THAP5    | 0.930687 | 935.5   |
| ENSGALT0000 THAP domain containing 9             | THAP9    | 0.978227 | 363     |
| ENSGALT0000 thrombomodulin                       | THBD     | 0.67843  | 154.5   |
| ENSGALT0000 thrombospondin 1                     | THBS1    | 0.711381 | 4173.96 |
| ENSGALT0000 thrombospondin 2                     | THBS2    | 0.916199 | 1504.5  |
| ENSGALT0000 thrombospondin 4                     | THBS4    | 0.949312 | 376     |
| ENSGALT0000 thymocyte selection associated       | THEMIS   | 0.649519 | 0.5     |
| ENSGALT0000 tRNA-histidine guanylyltransferase   | THG1L    | 0.971512 | 775.5   |
| ENSGALT0000 threonine synthase-like 1 (S. cerevi | THNSL1   | 0.968424 | 402.499 |
| ENSGALT0000 threonine synthase-like 2 (S. cerevi | THNSL2   | 0.986835 | 962     |
| ENSGALT0000 THO complex 1                        | THOC1    | 0.85066  | 1305    |
| ENSGALT0000 THO complex 2                        | THOC2    | 0.990988 | 2591    |
| ENSGALT0000 THO complex 3                        | THOC3    | 0.827385 | 1983.5  |
| ENSGALT0000 THO complex 4                        | THOC4    | 0.482634 | 3498    |
| ENSGALT0000 THO complex 5                        | THOC5    | 0.914567 | 4616.56 |
| ENSGALT0000 THO complex 7 homolog (Drosoph       | THOC7    | 0.804593 | 1904.5  |
| ENSGALT0000 thimet oligopeptidase 1              | THOP1    | 0.885989 | 308     |
| ENSGALT0000 thyroid hormone receptor, alpha      | THRA     | 0.956916 | 341.5   |
| ENSGALT0000 thyroid hormone receptor associate   | THRAP3   | 0.943685 | 8230.74 |
| ENSGALT0000 thyroid hormone receptor, beta (ery  | THRB     | 0.917004 | 64.0001 |
| ENSGALT0000 thyroid hormone responsive           | THRSP    | 0.49992  | 3.5     |
| ENSGALT0000 thrombospondin, type I, domain coi   | THSD1    | 0.859613 | 240     |
| ENSGALT0000 thrombospondin, type I, domain coi   | THSD4    | 0.811296 | 1137    |
| ENSGALT0000 thrombospondin, type I, domain coi   | THSD7A   | 0.743223 | 703     |
| ENSGALT0000 thrombospondin, type I, domain coi   | THSD7B   | 0.858744 | 3133.5  |
| ENSGALT0000 THUMP domain containing 1            | THUMPD1  | 0.787509 | 393.5   |
| ENSGALT0000 THUMP domain containing 2            | THUMPD2  | 0.98918  | 426.5   |
| ENSGALT0000 THUMP domain containing 3            | THUMPD3  | 0.814302 | 2317.5  |
| ENSGALT0000 Thy-1 cell surface antigen           | THY1     | 0.938464 | 1130.5  |
| ENSGALT0000 thymocyte nuclear protein 1          | THYN1    | 0.773664 | 310.191 |
| ENSGALT0000 TIA1 cytotoxic granule-associated    | ITIA1    | 0.935011 | 4561    |
| ENSGALT0000 TIA1 cytotoxic granule-associated    | ITIAL1   | 0.963216 | 2038.52 |
| ENSGALT0000 T-cell lymphoma invasion and metæ    | TIAM1    | 0.92407  | 2346.5  |
| ENSGALT0000 T-cell lymphoma invasion and metæ    | TIAM2    | 0.987503 | 488.996 |
| ENSGALT0000 toll-like receptor adaptor molecule  | TICAM1   | 0.969746 | 234     |
| ENSGALT0000 tyrosine kinase with immunoglobuli   | TIE1     | 0.83658  | 588     |

|                                                              |          |         |
|--------------------------------------------------------------|----------|---------|
| ENSGALT0000 TRAF-interacting protein with forkh TIFA         | 0.780657 | 5       |
| ENSGALT0000 tigger transposable element derive TIGD5         | 0.954374 | 376     |
| ENSGALT0000 Mitochondrial import inner membra TIM9_CHICK     | 0.768255 | 465     |
| ENSGALT0000 T-cell immunoglobulin and mucin d TIMD4          | 0.871196 | 28.5    |
| ENSGALT0000 translocase of inner mitochondrial r TIMM10      | 0.236623 | 1809.5  |
| ENSGALT0000 translocase of inner mitochondrial r TIMM17A     | 0.90063  | 2957    |
| ENSGALT0000 translocase of inner mitochondrial r TIMM22      | 0.722925 | 966     |
| ENSGALT0000 translocase of inner mitochondrial r TIMM23      | 0.784534 | 975     |
| ENSGALT0000 translocase of inner mitochondrial r TIMM44      | 0.897163 | 999.5   |
| ENSGALT0000 translocase of inner mitochondrial r TIMM8A      | 0.702268 | 2212.5  |
| ENSGALT0000 TIMP metallopeptidase inhibitor 3 TIMP3          | 0.675265 | 330     |
| ENSGALT0000 TIMP metallopeptidase inhibitor 4 TIMP4          | 0.481544 | 20.3958 |
| ENSGALT0000 tubulointerstitial nephritis antigen TINAG       | 1        | 0.5     |
| ENSGALT0000 tubulointerstitial nephritis antigen-lil TINAGL1 | 0.740205 | 107     |
| ENSGALT0000 TCDD-inducible poly(ADP-ribose) p TIPARP         | 0.928312 | 288     |
| ENSGALT0000 TIMELESS interacting protein TIPIN               | 0.955312 | 911     |
| ENSGALT0000 TIP41, TOR signaling pathway regul TIPRL         | 0.838938 | 968.5   |
| ENSGALT0000 toll-interleukin 1 receptor (TIR) dor TIRAP      | 0.922397 | 817     |
| ENSGALT0000 tight junction associated protein 1 ( TJAP1      | 0.980958 | 840.5   |
| ENSGALT0000 tight junction protein 1 (zona occlud TJP1       | 0.961026 | 4940.13 |
| ENSGALT0000 tight junction protein 2 (zona occlud TJP2       | 0.983271 | 5079.5  |
| ENSGALT0000 tight junction protein 3 (zona occlud TJP3       | 0.962685 | 1112.99 |
| ENSGALT0000 thymidine kinase 1, soluble TK1                  | 0.813328 | 1239    |
| ENSGALT0000 transketolase TKT                                | 0.840844 | 5112    |
| ENSGALT0000 TLC domain containing 1 TLCD1                    | 0.852584 | 2406    |
| ENSGALT0000 TLC domain containing 2 TLCD2                    | 0.889494 | 112.5   |
| ENSGALT0000 transducin-like enhancer of split 1 ( TLE1       | 0.952549 | 1617.23 |
| ENSGALT0000 transducin-like enhancer of split 4 ( TLE4       | 0.879237 | 1571.27 |
| ENSGALT0000 tousled-like kinase 1 TLK1                       | 0.99891  | 1005    |
| ENSGALT0000 tousled-like kinase 2 TLK2                       | 0.9832   | 1218.5  |
| ENSGALT0000 tolloid-like 1 TLL1                              | 0.773777 | 106     |
| ENSGALT0000 talin 1 TLN1                                     | 0.920561 | 6965.06 |
| ENSGALT0000 talin 2 TLN2                                     | 0.897566 | 2258.49 |
| ENSGALT0000 toll-like receptor 15 TLR15                      | 0.806665 | 3.5     |
| ENSGALT0000 Toll-like receptor 21 TLR21                      | 0.910526 | 225     |
| ENSGALT0000 toll-like receptor 2 type1 TLR2-1                | 0.800059 | 100.899 |
| ENSGALT0000 toll-like receptor 4 TLR4                        | 0.733619 | 14.5    |
| ENSGALT0000 toll-like receptor 5 TLR5                        | 0.974066 | 83      |
| ENSGALT0000 toll-like receptor 6 TLR6                        | 0.833616 | 13.7832 |
| ENSGALT0000 toll-like receptor 7 TLR7                        | 0.824205 | 6       |
| ENSGALT0000 T-cell leukemia homeobox 1 TLX1                  | 0.417534 | 16.5    |
| ENSGALT0000 T-cell leukemia homeobox 3 TLX3                  | 0.20121  | 14.5    |
| ENSGALT0000 TM2 domain containing 1 TM2D1                    | 0.912319 | 342     |
| ENSGALT0000 TM2 domain containing 2 TM2D2                    | 0.579451 | 1579.5  |
| ENSGALT0000 TM2 domain containing 3 TM2D3                    | 0.827323 | 254.004 |
| ENSGALT0000 transmembrane 4 L six family mem TM4SF1          | 0.898897 | 72.5    |
| ENSGALT0000 transmembrane 4 L six family mem TM4SF18         | 0.847573 | 153.5   |
| ENSGALT0000 transmembrane 4 L six family mem TM4SF19         | 0.918081 | 14.5    |
| ENSGALT0000 transmembrane 4 L six family mem TM4SF4          | 0.499253 | 18.5    |
| ENSGALT0000 transmembrane 6 superfamily mem TM6SF1           | 0.82616  | 368.5   |
| ENSGALT0000 transmembrane 7 superfamily mem TM7SF3           | 0.995489 | 312     |
| ENSGALT0000 transmembrane 7 superfamily mem TM7SF4           | ?        | 0       |
| ENSGALT0000 transmembrane 9 superfamily mem TM9SF2           | 0.988672 | 4664.5  |
| ENSGALT0000 transmembrane 9 superfamily mem TM9SF3           | 0.992943 | 4121.47 |
| ENSGALT0000 transmembrane 9 superfamily prote TM9SF4         | 0.971749 | 1857    |
| ENSGALT0000 transmembrane BAX inhibitor motif TMBIM1         | 0.986658 | 2497    |

|                                                             |  |          |         |
|-------------------------------------------------------------|--|----------|---------|
| ENSGALT0000 transmembrane BAX inhibitor motif TMBIM4        |  | 0.629761 | 1277    |
| ENSGALT0000 transmembrane channel-like 1 TMC1               |  | 0.831837 | 52      |
| ENSGALT0000 transmembrane channel-like 2 TMC2               |  | 0.387651 | 2.5     |
| ENSGALT0000 transmembrane channel-like 3 TMC3               |  | 0.989399 | 150     |
| ENSGALT0000 transmembrane channel-like 5 TMC5               |  | 0.935842 | 65      |
| ENSGALT0000 transmembrane channel-like 6 TMC6               |  | 0.979794 | 911.491 |
| ENSGALT0000 transmembrane channel-like 7 TMC7               |  | 0.987568 | 377.5   |
| ENSGALT0000 transmembrane and coiled-coil domain TMCC1      |  | 0.898909 | 729     |
| ENSGALT0000 transmembrane and coiled-coil domain TMCC2      |  | 0.867816 | 2422.5  |
| ENSGALT0000 transmembrane and coiled-coil domain TMCC3      |  | 0.87044  | 74      |
| ENSGALT0000 transmembrane and coiled-coil domain TMCO1      |  | 0.670565 | 1134    |
| ENSGALT0000 transmembrane and coiled-coil domain TMCO3      |  | 0.992196 | 582.501 |
| ENSGALT0000 transmembrane and coiled-coil domain TMCO4      |  | 0.975475 | 74      |
| ENSGALT0000 transmembrane and coiled-coil domain TMCO6      |  | 0.872168 | 942.542 |
| ENSGALT0000 transmembrane and coiled-coil domain TMCO7      |  | 0.87419  | 2075    |
| ENSGALT0000 transmembrane emp24-like trafficking TMED10     |  | 0.964307 | 9231.5  |
| ENSGALT0000 transmembrane emp24 domain transmembrane TMED2  |  | 0.951884 | 5519    |
| ENSGALT0000 transmembrane emp24 protein transmembrane TMED3 |  | 0.94351  | 763.5   |
| ENSGALT0000 transmembrane emp24 protein transmembrane TMED5 |  | 0.953568 | 4625.5  |
| ENSGALT0000 transmembrane emp24 protein transmembrane TMED8 |  | 0.910823 | 855     |
| ENSGALT0000 transmembrane protein with EGF-like TMEFF1      |  | 0.754392 | 1110    |
| ENSGALT0000 transmembrane protein with EGF-like TMEFF2      |  | 0.650907 | 1633    |
| ENSGALT0000 transmembrane protein 100 TMEM100               |  | 0.982101 | 71.5    |
| ENSGALT0000 transmembrane protein 104 TMEM104               |  | 0.988647 | 1387    |
| ENSGALT0000 transmembrane protein 106B TMEM106B             |  | 0.976613 | 938     |
| ENSGALT0000 transmembrane protein 106C TMEM106C             |  | 0.949918 | 662.5   |
| ENSGALT0000 transmembrane protein 108 TMEM108               |  | 0.81964  | 295.5   |
| ENSGALT0000 transmembrane protein 11 TMEM11                 |  | 0.709272 | 686     |
| ENSGALT0000 transmembrane protein 111 TMEM111               |  | 0.806991 | 1282.5  |
| ENSGALT0000 transmembrane protein 114 TMEM114               |  | 0.575119 | 0.5     |
| ENSGALT0000 transmembrane protein 115 TMEM115               |  | 0.863466 | 1488.5  |
| ENSGALT0000 transmembrane protein 116 TMEM116               |  | 0.754281 | 34.6566 |
| ENSGALT0000 transmembrane protein 117 TMEM117               |  | 0.943501 | 77      |
| ENSGALT0000 transmembrane protein 119 TMEM119               |  | 0.712106 | 103     |
| ENSGALT0000 transmembrane protein 120A TMEM120A             |  | 0.916303 | 811     |
| ENSGALT0000 transmembrane protein 120B TMEM120B             |  | 0.930234 | 388     |
| ENSGALT0000 transmembrane protein 121 TMEM121               |  | 0.69751  | 417     |
| ENSGALT0000 transmembrane protein 123 TMEM123               |  | 0.937014 | 1696.51 |
| ENSGALT0000 transmembrane protein 125 TMEM125               |  | 0.499665 | 5       |
| ENSGALT0000 transmembrane protein 126A TMEM126A             |  | 0.913567 | 344.46  |
| ENSGALT0000 transmembrane protein 128 TMEM128               |  | 0.61958  | 154.5   |
| ENSGALT0000 transmembrane protein 129 TMEM129               |  | 0.896845 | 724.5   |
| ENSGALT0000 transmembrane protein 130 TMEM130               |  | 0.974416 | 626.5   |
| ENSGALT0000 transmembrane protein 131 TMEM131               |  | 0.953344 | 3163.97 |
| ENSGALT0000 transmembrane protein 132B TMEM132B             |  | 0.858212 | 177.037 |
| ENSGALT0000 transmembrane protein 132C TMEM132C             |  | 0.630584 | 163.422 |
| ENSGALT0000 transmembrane protein 132D TMEM132D             |  | 0.820177 | 350     |
| ENSGALT0000 transmembrane protein 132E TMEM132E             |  | 0.641318 | 2103.5  |
| ENSGALT0000 transmembrane protein 135 TMEM135               |  | 0.976014 | 396     |
| ENSGALT0000 transmembrane protein 136 TMEM136               |  | 0.922547 | 69.0001 |
| ENSGALT0000 transmembrane protein 138 TMEM138               |  | 0.707172 | 332     |
| ENSGALT0000 transmembrane protein 140 TMEM140               |  | 0.973409 | 18      |
| ENSGALT0000 transmembrane protein 141 TMEM141               |  | 0.262095 | 866     |
| ENSGALT0000 transmembrane protein 144 TMEM144               |  | 0.98434  | 276     |
| ENSGALT0000 transmembrane protein 14A TMEM14A               |  | 0.754387 | 215.5   |
| ENSGALT0000 transmembrane protein 14C TMEM14C               |  | 0.960954 | 1107    |

|                                        |          |          |         |
|----------------------------------------|----------|----------|---------|
| ENSGALT0000 transmembrane protein 150A | TMEM150A | 0.679643 | 76      |
| ENSGALT0000 transmembrane protein 150C | TMEM150C | 0.93124  | 224     |
| ENSGALT0000 transmembrane protein 151B | TMEM151B | 0.834624 | 518.5   |
| ENSGALT0000 transmembrane protein 154  | TMEM154  | 0.264962 | 6       |
| ENSGALT0000 transmembrane protein 156  | TMEM156  | 0.669282 | 1.5     |
| ENSGALT0000 transmembrane protein 161B | TMEM161B | 0.944749 | 122     |
| ENSGALT0000 transmembrane protein 163  | TMEM163  | 0.587116 | 163     |
| ENSGALT0000 transmembrane protein 164  | TMEM164  | 0.981408 | 1519.5  |
| ENSGALT0000 transmembrane protein 167B | TMEM167B | 0.164296 | 824.5   |
| ENSGALT0000 transmembrane protein 168  | TMEM168  | 0.943026 | 406     |
| ENSGALT0000 transmembrane protein 169  | TMEM169  | 0.964654 | 606     |
| ENSGALT0000 transmembrane protein 17   | TMEM17   | 0.892313 | 57      |
| ENSGALT0000 transmembrane protein 170B | TMEM170B | 0.660301 | 43.5    |
| ENSGALT0000 transmembrane protein 171  | TMEM171  | 0.848443 | 261.5   |
| ENSGALT0000 transmembrane protein 173  | TMEM173  | 0.972802 | 144.5   |
| ENSGALT0000 transmembrane protein 174  | TMEM174  | 0.958562 | 11.5    |
| ENSGALT0000 transmembrane protein 175  | TMEM175  | 0.978015 | 1097.5  |
| ENSGALT0000 transmembrane protein 177  | TMEM177  | 0.939112 | 198.5   |
| ENSGALT0000 transmembrane protein 179  | TMEM179  | 0.748531 | 42      |
| ENSGALT0000 transmembrane protein 18   | TMEM18   | 0.929359 | 525     |
| ENSGALT0000 transmembrane protein 180  | TMEM180  | 0.965268 | 1336    |
| ENSGALT0000 transmembrane protein 181  | TMEM181  | 0.977278 | 368.5   |
| ENSGALT0000 transmembrane protein 182  | TMEM182  | ?        | 0       |
| ENSGALT0000 transmembrane protein 183A | TMEM183A | 0.800545 | 1042.51 |
| ENSGALT0000 transmembrane protein 184A | TMEM184A | 0.743508 | 404     |
| ENSGALT0000 transmembrane protein 184B | TMEM184B | 0.944648 | 3862.17 |
| ENSGALT0000 transmembrane protein 184C | TMEM184C | 0.929855 | 2186.5  |
| ENSGALT0000 transmembrane protein 185A | TMEM185A | 0.934184 | 715     |
| ENSGALT0000 transmembrane protein 186  | TMEM186  | 0.842862 | 340     |
| ENSGALT0000 transmembrane protein 188  | TMEM188  | 0.949962 | 168     |
| ENSGALT0000 transmembrane protein 19   | TMEM19   | 0.963199 | 666     |
| ENSGALT0000 transmembrane protein 192  | TMEM192  | 0.974076 | 120.5   |
| ENSGALT0000 transmembrane protein 194A | TMEM194A | 0.998751 | 283     |
| ENSGALT0000 transmembrane protein 194B | TMEM194B | 0.893795 | 673     |
| ENSGALT0000 transmembrane protein 196  | TMEM196  | 0.723283 | 7.5     |
| ENSGALT0000 transmembrane protein 198  | TMEM198  | 0.911425 | 1486.5  |
| ENSGALT0000 transmembrane protein 199  | TMEM199  | 0.253308 | 1298    |
| ENSGALT0000 transmembrane protein 2    | TMEM2    | 0.965306 | 3184.05 |
| ENSGALT0000 transmembrane protein 200A | TMEM200A | 0.950091 | 688     |
| ENSGALT0000 transmembrane protein 200B | TMEM200B | 0.83176  | 35.5    |
| ENSGALT0000 transmembrane protein 200C | TMEM200C | 0.964917 | 399     |
| ENSGALT0000 transmembrane protein 201  | TMEM201  | 0.952258 | 1218.5  |
| ENSGALT0000 transmembrane protein 203  | TMEM203  | 0.652335 | 860.5   |
| ENSGALT0000 transmembrane protein 204  | TMEM204  | 0.736687 | 100.5   |
| ENSGALT0000 transmembrane protein 206  | TMEM206  | 0.984741 | 585.5   |
| ENSGALT0000 transmembrane protein 207  | TMEM207  | 0.464758 | 0       |
| ENSGALT0000 transmembrane protein 209  | TMEM209  | 0.964743 | 1079.5  |
| ENSGALT0000 transmembrane protein 211  | TMEM211  | 0.8179   | 100     |
| ENSGALT0000 transmembrane protein 213  | TMEM213  | 0.898356 | 1       |
| ENSGALT0000 transmembrane protein 214  | TMEM214  | 0.880844 | 2913.67 |
| ENSGALT0000 transmembrane protein 215  | TMEM215  | 0.790055 | 8.5     |
| ENSGALT0000 transmembrane protein 216  | TMEM216  | 0.56633  | 141.5   |
| ENSGALT0000 transmembrane protein 22   | TMEM22   | 0.912409 | 1033.5  |
| ENSGALT0000 transmembrane protein 222  | TMEM222  | 0.959644 | 866     |
| ENSGALT0000 transmembrane protein 229B | TMEM229B | 0.994225 | 1814.72 |
| ENSGALT0000 transmembrane protein 231  | TMEM231  | 0.910546 | 1101.5  |

|                                           |         |          |         |
|-------------------------------------------|---------|----------|---------|
| ENSGALT0000 transmembrane protein 234     | TMEM234 | 0.991401 | 147.5   |
| ENSGALT0000 transmembrane protein 237     | TMEM237 | 0.994286 | 646     |
| ENSGALT0000 transmembrane protein 242     | TMEM242 | 0.956933 | 320     |
| ENSGALT0000 transmembrane protein 26      | TMEM26  | 0.930687 | 520     |
| ENSGALT0000 transmembrane protein 27      | TMEM27  | 0.668575 | 6       |
| ENSGALT0000 transmembrane protein 30A     | TMEM30A | 0.960053 | 4114.5  |
| ENSGALT0000 transmembrane protein 30C     | TMEM30C | 0.954375 | 44.5    |
| ENSGALT0000 transmembrane protein 33      | TMEM33  | 0.938623 | 978.5   |
| ENSGALT0000 transmembrane protein 35      | TMEM35  | 0.706783 | 906     |
| ENSGALT0000 transmembrane protein 37      | TMEM37  | 0.747465 | 16.5    |
| ENSGALT0000 transmembrane protein 38A     | TMEM38A | 0.960474 | 1672.52 |
| ENSGALT0000 transmembrane protein 38B     | TMEM38B | 0.979839 | 606     |
| ENSGALT0000 transmembrane protein 39A     | TMEM39A | 0.959533 | 1448.5  |
| ENSGALT0000 transmembrane protein 39B     | TMEM39B | 0.922917 | 964.985 |
| ENSGALT0000 transmembrane protein 41A     | TMEM41A | 0.9368   | 896.5   |
| ENSGALT0000 transmembrane protein 41B     | TMEM41B | 0.925363 | 863     |
| ENSGALT0000 transmembrane protein 43      | TMEM43  | 0.927287 | 668.5   |
| ENSGALT0000 transmembrane protein 45A     | TMEM45A | 0.488744 | 57.5    |
| ENSGALT0000 transmembrane protein 45B     | TMEM45B | 0.856988 | 15.5    |
| ENSGALT0000 transmembrane protein 47      | TMEM47  | 0.977928 | 737     |
| ENSGALT0000 transmembrane protein 48      | TMEM48  | 0.90908  | 1562.5  |
| ENSGALT0000 transmembrane protein 5       | TMEM5   | 0.920807 | 249     |
| ENSGALT0000 transmembrane protein 50A     | TMEM50A | 0.710041 | 1563    |
| ENSGALT0000 transmembrane protein 50B     | TMEM50B | 0.933421 | 641     |
| ENSGALT0000 transmembrane protein 51      | TMEM51  | 0.926067 | 372.5   |
| ENSGALT0000 transmembrane protein 52      | TMEM52  | 0.938369 | 48.5    |
| ENSGALT0000 transmembrane protein 53      | TMEM53  | 0.741809 | 443.5   |
| ENSGALT0000 transmembrane protein 55A     | TMEM55A | 0.762425 | 837.5   |
| ENSGALT0000 transmembrane protein 56      | TMEM56  | 0.98991  | 145     |
| ENSGALT0000 transmembrane protein 57      | TMEM57  | 0.955897 | 2188.5  |
| ENSGALT0000 transmembrane protein 59      | TMEM59  | 0.971887 | 4026    |
| ENSGALT0000 transmembrane protein 59-like | TMEM59L | 0.691378 | 77      |
| ENSGALT0000 transmembrane protein 60      | TMEM60  | 0.998898 | 361.5   |
| ENSGALT0000 transmembrane protein 61      | TMEM61  | 0.38447  | 160.5   |
| ENSGALT0000 transmembrane protein 62      | TMEM62  | 0.996151 | 515.5   |
| ENSGALT0000 transmembrane protein 63A     | TMEM63A | 0.993573 | 322     |
| ENSGALT0000 transmembrane protein 63B     | TMEM63B | 0.95226  | 2635.13 |
| ENSGALT0000 transmembrane protein 63C     | TMEM63C | 0.983714 | 1469.87 |
| ENSGALT0000 transmembrane protein 64      | TMEM64  | 0.914557 | 563     |
| ENSGALT0000 transmembrane protein 65      | TMEM65  | 0.940594 | 990.006 |
| ENSGALT0000 transmembrane protein 66      | TMEM66  | 0.948499 | 1016    |
| ENSGALT0000 transmembrane protein 67      | TMEM67  | 0.998835 | 752.5   |
| ENSGALT0000 transmembrane protein 68      | TMEM68  | 0.968436 | 607     |
| ENSGALT0000 transmembrane protein 69      | TMEM69  | 0.909409 | 294.5   |
| ENSGALT0000 transmembrane protein 70      | TMEM70  | 0.869707 | 538.5   |
| ENSGALT0000 transmembrane protein 71      | TMEM71  | 0.844654 | 8.5     |
| ENSGALT0000 transmembrane protein 72      | TMEM72  | 0.75214  | 3       |
| ENSGALT0000 transmembrane protein 74      | TMEM74  | 0.631695 | 258     |
| ENSGALT0000 transmembrane protein 79      | TMEM79  | 0.982175 | 546.5   |
| ENSGALT0000 transmembrane protein 80      | TMEM80  | 0.968037 | 99      |
| ENSGALT0000 transmembrane protein 81      | TMEM81  | 0.482185 | 1       |
| ENSGALT0000 transmembrane protein 82      | TMEM82  | 0.953745 | 143     |
| ENSGALT0000 transmembrane protein 86A     | TMEM86A | 0.909433 | 96      |
| ENSGALT0000 transmembrane protein 87A     | TMEM87A | 0.995163 | 1484.5  |
| ENSGALT0000 transmembrane protein 88B     | TMEM88B | 0.768245 | 2.5     |
| ENSGALT0000 transmembrane protein 8A      | TMEM8A  | 0.995554 | 1467    |

|                                                                           |           |          |         |
|---------------------------------------------------------------------------|-----------|----------|---------|
| ENSGALT0000 transmembrane protein 8B                                      | TMEM8B    | 0.732102 | 151     |
| ENSGALT0000 transmembrane protein 8C                                      | TMEM8C    | 0.562993 | 0       |
| ENSGALT0000 transmembrane protein 9                                       | TMEM9     | 0.944702 | 1097.5  |
| ENSGALT0000 transmembrane protein 93                                      | TMEM93    | 0.127348 | 81.6453 |
| ENSGALT0000 transmembrane protein 97                                      | TMEM97    | 0.940293 | 644.5   |
| ENSGALT0000 TMEM9 domain family, member B                                 | TMEM9B    | 0.805841 | 1081    |
| ENSGALT0000 TATA element modulatory factor 1                              | TMF1      | 0.970759 | 1490    |
| ENSGALT0000 transmembrane inner ear                                       | TMIE      | 0.62814  | 0       |
| ENSGALT0000 transmembrane and immunoglobulin-like domain containing 1     | TMIGD1    | 0.261655 | 2.5     |
| ENSGALT0000 trimethyllysine hydroxylase, epsilon                          | TMLHE     | 0.941942 | 1662    |
| ENSGALT0000 tropomodulin 1                                                | TMOD1     | 0.797177 | 238.5   |
| ENSGALT0000 tropomodulin 2 (neuronal)                                     | TMOD2     | 0.854627 | 406     |
| ENSGALT0000 tropomodulin 3 (ubiquitous)                                   | TMOD3     | 0.902419 | 949     |
| ENSGALT0000 tropomodulin 4 (muscle)                                       | TMOD4     | 0.685355 | 10      |
| ENSGALT0000 thymopoietin                                                  | TMPO      | 0.96816  | 3915.53 |
| ENSGALT0000 transmembrane (C-terminal) protease, serine 1                 | TMPRSS12  | 0.603682 | 0.5     |
| ENSGALT0000 transmembrane protease, serine 11                             | TMPRSS13  | 0.952328 | 342     |
| ENSGALT0000 transmembrane protease, serine 2                              | TMPRSS2   | 0.992787 | 178     |
| ENSGALT0000 transmembrane protease, serine 3                              | TMPRSS3   | 0.322362 | 1       |
| ENSGALT0000 transmembrane protease, serine 4                              | TMPRSS4   | 0.93272  | 28.5    |
| ENSGALT0000 transmembrane protease, serine 6                              | TMPRSS6   | 0.842049 | 13      |
| ENSGALT0000 transmembrane protease, serine 7                              | TMPRSS7   | 0.622943 | 721     |
| ENSGALT0000 transmembrane protease, serine 9                              | TMPRSS9   | 0.745715 | 1243    |
| ENSGALT0000 thymosin, beta 10                                             | TMSB10    | 0.369284 | 42      |
| ENSGALT0000 transmembrane and tetratricopeptide repeat containing 1       | TMTC1     | 0.994463 | 1165    |
| ENSGALT0000 transmembrane and tetratricopeptide repeat containing 2       | TMTC2     | 0.901076 | 329     |
| ENSGALT0000 transmembrane and tetratricopeptide repeat containing 3       | TMTC3     | 0.975992 | 885     |
| ENSGALT0000 transmembrane and tetratricopeptide repeat containing 4       | TMTC4     | 0.966868 | 1631.5  |
| ENSGALT0000 thioredoxin-related transmembrane protein 1                   | TMX1      | 0.882222 | 24      |
| ENSGALT0000 thioredoxin-related transmembrane protein 2                   | TMX2      | 0.773628 | 1977.5  |
| ENSGALT0000 thioredoxin-related transmembrane protein 3                   | TMX3      | 0.984936 | 1291    |
| ENSGALT0000 thioredoxin-related transmembrane protein 4                   | TMX4      | 0.97052  | 318     |
| ENSGALT0000 tenascin C                                                    | TNC       | 0.881612 | 17034.9 |
| ENSGALT0000 tumor necrosis factor, alpha-inducible 1                      | TNFAIP1   | 0.960637 | 2100.5  |
| ENSGALT0000 tumor necrosis factor, alpha-inducible 2                      | TNFAIP2   | 0.924729 | 38.5    |
| ENSGALT0000 tumor necrosis factor, alpha-inducible 3                      | TNFAIP3   | 0.966846 | 156.5   |
| ENSGALT0000 tumor necrosis factor, alpha-inducible 6                      | TNFAIP6   | 0.793434 | 190     |
| ENSGALT0000 tumor necrosis factor, alpha-inducible 8                      | TNFAIP8   | 0.96524  | 143     |
| ENSGALT0000 tumor necrosis factor, alpha-inducible 8L1                    | TNFAIP8L1 | 0.888708 | 1248.5  |
| ENSGALT0000 tumor necrosis factor, alpha-inducible 8L3                    | TNFAIP8L3 | 0.719584 | 21.5    |
| ENSGALT0000 tumor necrosis factor receptor superfamily class 1 member 11A | TNFRSF11A | 0.948622 | 278.001 |
| ENSGALT0000 tumor necrosis factor receptor superfamily class 1 member 11B | TNFRSF11B | 0.841263 | 474.499 |
| ENSGALT0000 tumor necrosis factor receptor superfamily class 1 member 13B | TNFRSF13B | 0.753791 | 7.5     |
| ENSGALT0000 tumor necrosis factor receptor superfamily class 1 member 13C | TNFRSF13C | 0.898356 | 0.5     |
| ENSGALT0000 tumor necrosis factor receptor superfamily class 1 member 18  | TNFRSF18  | 0.742226 | 4.5     |
| ENSGALT0000 tumor necrosis factor receptor superfamily class 1 member 19  | TNFRSF19  | 0.99118  | 1668.5  |
| ENSGALT0000 tumor necrosis factor receptor superfamily class 1 member 1A  | TNFRSF1A  | 0.982362 | 429.499 |
| ENSGALT0000 tumor necrosis factor receptor superfamily class 1 member 1B  | TNFRSF1B  | 0.998866 | 88      |
| ENSGALT0000 tumor necrosis factor receptor superfamily class 1 member 21  | TNFRSF21  | 0.873167 | 1309.97 |
| ENSGALT0000 tumor necrosis factor receptor superfamily class 4 member 4   | TNFRSF4   | 0.969305 | 12.5    |
| ENSGALT0000 tumor necrosis factor receptor superfamily class 6 member B   | TNFRSF6B  | 0.464758 | 0       |
| ENSGALT0000 tumor necrosis factor receptor superfamily class 8 member 8   | TNFRSF8   | 0.977878 | 19      |
| ENSGALT0000 tumor necrosis factor receptor superfamily class 9 member 9   | TNFRSF9   | 0.987866 | 774.5   |
| ENSGALT0000 tumor necrosis factor (ligand) superfamily class 10 member 10 | TNFSF10   | 0.765017 | 455.001 |
| ENSGALT0000 tumor necrosis factor (ligand) superfamily class 11 member 11 | TNFSF11   | 0.961454 | 9       |
| ENSGALT0000 tumor necrosis factor (ligand) superfamily class 13 member B  | TNFSF13B  | 0.611393 | 4       |

|                                                                  |          |          |         |
|------------------------------------------------------------------|----------|----------|---------|
| ENSGALT0000 tumor necrosis factor (ligand) superfamily 15        | TNFSF15  | 0.748809 | 2       |
| ENSGALT0000 tumor necrosis factor (ligand) superfamily 4         | TNFSF4   | 0.709213 | 0.5     |
| ENSGALT0000 tumor necrosis factor (ligand) superfamily 8         | TNFSF8   | 0.551771 | 0       |
| ENSGALT0000 TRAF2 and NCK interacting kinase                     | TNIK     | 0.896404 | 2451.5  |
| ENSGALT0000 TNFAIP3 interacting protein 1                        | TNIP1    | 0.861233 | 766.502 |
| ENSGALT0000 TNFAIP3 interacting protein 2                        | TNIP2    | 0.989008 | 116.5   |
| ENSGALT0000 TNFAIP3 interacting protein 3                        | TNIP3    | 0.562993 | 1.5     |
| ENSGALT0000 tankyrase, TRF1-interacting ankyrin repeat domain 1  | TNKS     | 0.975919 | 4165    |
| ENSGALT0000 tankyrase, TRF1-interacting ankyrin repeat domain 2  | TNKS2    | 0.979783 | 1922.53 |
| ENSGALT0000 tenomodulin                                          | TNMD     | 0.824033 | 123.5   |
| ENSGALT0000 tenascin N                                           | TNN      | 0.95932  | 11      |
| ENSGALT0000 troponin C type 1 (slow)                             | TNNC1    | 0.747166 | 200.5   |
| ENSGALT0000 Troponin C, skeletal muscle                          | TNNC2    | 0.478782 | 2431.5  |
| ENSGALT0000 troponin I type 1 (skeletal, slow)                   | TNNI1    | 0.841658 | 68      |
| ENSGALT0000 troponin I type 2 (skeletal, fast)                   | TNNI2    | 0.825184 | 20.5    |
| ENSGALT0000 troponin T type 2 (cardiac)                          | TNNT2    | 0.21406  | 64      |
| ENSGALT0000 troponin T type 3 (skeletal, fast)                   | TNNT3    | 0.635249 | 33      |
| ENSGALT0000 transportin 1                                        | TNPO1    | 0.964762 | 2227.1  |
| ENSGALT0000 transportin 3                                        | TNPO3    | 0.917637 | 4658.5  |
| ENSGALT0000 tenascin R (restrictin, janusin)                     | TNR      | 0.757685 | 32      |
| ENSGALT0000 trinucleotide repeat containing 15                   | TNRC15   | 0.975151 | 2504.41 |
| ENSGALT0000 trinucleotide repeat containing 6A                   | TNRC6A   | 0.979329 | 3874    |
| ENSGALT0000 trinucleotide repeat containing 6B                   | TNRC6B   | 0.984419 | 2277    |
| ENSGALT0000 trinucleotide repeat containing 6C                   | TNRC6C   | 0.942693 | 3650.02 |
| ENSGALT0000 tensin 1                                             | TNS1     | 0.987334 | 3689.87 |
| ENSGALT0000 tensin 3                                             | TNS3     | 0.992094 | 1405    |
| ENSGALT0000 tenascin XB                                          | TNXB     | 0.900699 | 40.2557 |
| ENSGALT0000 transducer of ERBB2, 1                               | TOB1     | 0.973229 | 520     |
| ENSGALT0000 transducer of ERBB2, 2                               | TOB2     | 0.974077 | 2689    |
| ENSGALT0000 target of EGR1, member 1 (nuclear)                   | TOE1     | 0.936771 | 711.5   |
| ENSGALT0000 toll interacting protein                             | TOLLIP   | 0.870911 | 1107    |
| ENSGALT0000 target of myb1 (chicken)                             | TOM1     | 0.941949 | 987.501 |
| ENSGALT0000 target of myb1 (chicken)-like 1                      | TOM1L1   | 0.886225 | 228     |
| ENSGALT0000 target of myb1-like 2 (chicken)                      | TOM1L2   | 0.937949 | 941     |
| ENSGALT0000 translocase of outer mitochondrial membrane 20       | TOMM20   | 0.880561 | 2125.5  |
| ENSGALT0000 translocase of outer mitochondrial membrane 22       | TOMM22   | 0.316968 | 3450    |
| ENSGALT0000 translocase of outer mitochondrial membrane 34       | TOMM34   | 0.777476 | 559     |
| ENSGALT0000 translocase of outer mitochondrial membrane 40L      | TOMM40L  | 0.515157 | 1157.5  |
| ENSGALT0000 translocase of outer mitochondrial membrane 5        | TOMM5    | 0.332816 | 1829.5  |
| ENSGALT0000 translocase of outer mitochondrial membrane 7        | TOMM7    | 0.37762  | 1112    |
| ENSGALT0000 translocase of outer mitochondrial membrane 70A      | TOMM70A  | 0.860239 | 1620.5  |
| ENSGALT0000 topoisomerase (DNA) I                                | TOP1     | 0.963745 | 5931    |
| ENSGALT0000 topoisomerase (DNA) I, mitochondrial                 | TOP1MT   | 0.907289 | 867.5   |
| ENSGALT0000 topoisomerase (DNA) II alpha 170kDa                  | TOP2A    | 0.923321 | 9523.17 |
| ENSGALT0000 topoisomerase (DNA) II beta 180kDa                   | TOP2B    | 0.96448  | 6722.35 |
| ENSGALT0000 topoisomerase (DNA) III alpha                        | TOP3A    | 0.967049 | 1005.5  |
| ENSGALT0000 topoisomerase (DNA) III beta                         | TOP3B    | 0.96968  | 1296.48 |
| ENSGALT0000 topoisomerase (DNA) II binding protein               | TOPBP1   | 0.951351 | 293     |
| ENSGALT0000 topoisomerase I binding, arginine/sulfhydryl         | TOPORS   | 0.981705 | 176.5   |
| ENSGALT0000 torsin family 1, member A (torsin A)                 | TOR1A    | 0.935112 | 1707.5  |
| ENSGALT0000 torsin A interacting protein 1                       | TOR1AIP1 | 0.981051 | 466     |
| ENSGALT0000 torsin A interacting protein 2                       | TOR1AIP2 | 0.994898 | 100     |
| ENSGALT0000 torsin family 1, member B (torsin B)                 | TOR1B    | 0.95569  | 596.002 |
| ENSGALT0000 torsin family 2, member A                            | TOR2A    | 0.99397  | 387.5   |
| ENSGALT0000 torsin family 3, member A                            | TOR3A    | 0.981965 | 574     |
| ENSGALT0000 thymocyte selection-associated high molecular weight | TOX      | 0.975868 | 599.502 |

|                                                          |             |          |         |
|----------------------------------------------------------|-------------|----------|---------|
| ENSGALT0000 TOX high mobility group box family TOX2      |             | 0.901417 | 792.5   |
| ENSGALT0000 TOX high mobility group box family TOX3      |             | 0.992181 | 496.004 |
| ENSGALT0000 tumor protein p53 binding protein 1 TP53BP1  |             | 0.931507 | 3287.5  |
| ENSGALT0000 tumor protein p53 binding protein, 2 TP53BP2 |             | 0.980544 | 6073    |
| ENSGALT0000 tumor protein p53 inducible protein TP53I11  |             | 0.64871  | 1586    |
| ENSGALT0000 tumor protein p53 inducible protein TP53I3   |             | 0.797002 | 66      |
| ENSGALT0000 tumor protein p53 inducible nuclear TP53INP1 |             | 0.991119 | 4274    |
| ENSGALT0000 tumor protein p53 inducible nuclear TP53INP2 |             | 0.86684  | 219.5   |
| ENSGALT0000 TP53 regulating kinase                       | TP53RK      | 0.50926  | 642.422 |
| ENSGALT0000 TP53 target 5                                | TP53TG5     | 0.971175 | 11      |
| ENSGALT0000 tumor protein p63                            | TP63        | 0.913286 | 189     |
| ENSGALT0000 tumor protein p73                            | TP73        | 0.929362 | 170.5   |
| ENSGALT0000 trophoblast glycoprotein                     | TPBG        | 0.92569  | 91      |
| ENSGALT0000 two pore segment channel 1                   | TPCN1       | 0.996044 | 1234.5  |
| ENSGALT0000 two pore segment channel 2                   | TPCN2       | 0.974539 | 254     |
| ENSGALT0000 tumor protein D52                            | TPD52       | 0.887406 | 1871.49 |
| ENSGALT0000 tumor protein D52-like 2                     | TPD52L2     | 0.950091 | 5002.5  |
| ENSGALT0000 Tumor protein D53 homolog                    | TPD53_CHICK | 0.970003 | 259.377 |
| ENSGALT0000 tryptophan hydroxylase 1                     | TPH1        | 0.807039 | 869     |
| ENSGALT0000 tryptophan hydroxylase 2                     | TPH2        | 0.966278 | 104.5   |
| ENSGALT0000 triosephosphate isomerase 1                  | TPI1        | 0.928029 | 13866.5 |
| ENSGALT0000 thiamin pyrophosphokinase 1                  | TPK1        | 0.910405 | 287.5   |
| ENSGALT0000 tropomyosin 1 (alpha)                        | TPM1        | 0.899148 | 3652.49 |
| ENSGALT0000 tropomyosin 2 (beta)                         | TPM2        | 0.696738 | 1027.01 |
| ENSGALT0000 tropomyosin 3                                | TPM3        | 0.881555 | 11827   |
| ENSGALT0000 thiopurine S-methyltransferase               | TPMT        | 0.548531 | 578.5   |
| ENSGALT0000 thyroid peroxidase                           | TPO         | 0.534404 | 2       |
| ENSGALT0000 tripeptidyl peptidase I                      | TPP1        | 0.825483 | 2621.59 |
| ENSGALT0000 tripeptidyl peptidase II                     | TPP2        | 0.949487 | 1879    |
| ENSGALT0000 tubulin polymerization promoting pr          | TPPP        | 0.963587 | 10      |
| ENSGALT0000 tubulin polymerization-promoting pr          | TPPP2       | ?        | 0       |
| ENSGALT0000 tubulin polymerization-promoting pr          | TPPP3       | 0.294446 | 458.5   |
| ENSGALT0000 translocated promoter region (to ac          | TPR         | 0.945167 | 5593    |
| ENSGALT0000 transmembrane protein, adipocyte             | TPRA1       | 0.991212 | 2250.5  |
| ENSGALT0000 tumor protein p63 regulated 1-like           | TPRG1L      | 0.829096 | 3441    |
| ENSGALT0000 TP53RK binding protein                       | TPRKB       | 0.709741 | 302.5   |
| ENSGALT0000 taperin                                      | TPRN        | 0.974018 | 630.5   |
| ENSGALT0000 tetra-peptide repeat homeobox-like           | TPRXL       | 0.628565 | 1.5     |
| ENSGALT0000 tyrosylprotein sulfotransferase 1            | TPST1       | 0.873616 | 1146    |
| ENSGALT0000 tyrosylprotein sulfotransferase 2            | TPST2       | 0.955952 | 718     |
| ENSGALT0000 tumor protein, translationally-contr         | TPT1        | 0.72593  | 27279.3 |
| ENSGALT0000 transmembrane phosphatase with i             | TPTE        | 0.927231 | 202     |
| ENSGALT0000 TPX2, microtubule-associated, hon            | TPX2        | 0.918544 | 2589    |
| ENSGALT0000 transformer 2 alpha homolog (Dros            | TRA2A       | 0.820598 | 5665.46 |
| ENSGALT0000 transformer 2 beta homolog (Dros             | TRA2B       | 0.895205 | 4679    |
| ENSGALT0000 TraB domain containing                       | TRABD       | 0.966315 | 1260    |
| ENSGALT0000 TNFRSF1A-associated via death d              | TRADD       | 0.977053 | 203.5   |
| ENSGALT0000 TNF receptor-associated factor 1             | TRAF1       | 0.976536 | 126.5   |
| ENSGALT0000 TNF receptor-associated factor 2             | TRAF2       | 0.990247 | 868     |
| ENSGALT0000 TNF receptor-associated factor 3             | TRAF3       | 0.957206 | 146     |
| ENSGALT0000 TNF receptor-associated factor 3 ir          | TRAF3IP1    | 0.925908 | 751     |
| ENSGALT0000 TRAF3 interacting protein 2                  | TRAF3IP2    | 0.995921 | 467     |
| ENSGALT0000 TRAF3 interacting protein 3                  | TRAF3IP3    | 0.801887 | 10.5    |
| ENSGALT0000 TNF receptor-associated factor 4             | TRAF4       | 0.61056  | 492     |
| ENSGALT0000 TNF receptor-associated factor 5             | TRAF5       | 0.990099 | 327     |
| ENSGALT0000 TNF receptor-associated factor 6             | TRAF6       | 0.993129 | 291.5   |



|                                                    |            |          |         |
|----------------------------------------------------|------------|----------|---------|
| ENSGALT0000 TNF receptor-associated factor 7       | TRAF7      | 0.91703  | 2004.98 |
| ENSGALT0000 TRAF-type zinc finger domain cont      | TRAFD1     | 0.97511  | 994.507 |
| ENSGALT0000 TNF-related apoptosis inducing ligã    | TRAIL-LIKE | 0.923676 | 760.5   |
| ENSGALT0000 TRAF interacting protein               | TRAIP      | 0.855397 | 646     |
| ENSGALT0000 trafficking protein, kinesin binding 1 | TRAK1      | 0.989592 | 1636.5  |
| ENSGALT0000 trafficking protein, kinesin binding 2 | TRAK2      | 0.900262 | 354     |
| ENSGALT0000 translocation associated membranè      | TRAM1      | 0.983906 | 1708    |
| ENSGALT0000 translocation associated membranè      | TRAM2      | 0.968199 | 1927    |
| ENSGALT0000 tetratricopeptide repeat and ankyrir   | TRANK1     | 0.96131  | 43.5    |
| ENSGALT0000 TNF receptor-associated protein 1      | TRAP1      | 0.884623 | 3227    |
| ENSGALT0000 trafficking protein particle complex   | TRAPPC11   | 0.951148 | 1321.99 |
| ENSGALT0000 Trafficking protein particle complex   | TRAPPC2    | 0.960641 | 1342.5  |
| ENSGALT0000 trafficking protein particle complex   | TRAPPC2L   | 0.34398  | 1269.5  |
| ENSGALT0000 trafficking protein particle complex   | TRAPPC3    | 0.96068  | 2487    |
| ENSGALT0000 trafficking protein particle complex   | TRAPPC4    | 0.698708 | 1547.49 |
| ENSGALT0000 trafficking protein particle complex   | TRAPPC6B   | 0.23182  | 418     |
| ENSGALT0000 trafficking protein particle complex   | TRAPPC8    | 0.97485  | 896.5   |
| ENSGALT0000 trafficking protein particle complex   | TRAPPC9    | 0.944549 | 1380.99 |
| ENSGALT0000 T cell receptor associated transmem    | TRAT1      | 0.904804 | 1       |
| ENSGALT0000 tRNA aspartic acid methyltransfera     | TRDMT1     | 0.979594 | 567.001 |
| ENSGALT0000 triadin                                | TRDN       | 0.517485 | 0.5     |
| ENSGALT0000 triggering receptor expressed on m     | TREM2      | 0.377765 | 14.5    |
| ENSGALT0000 triggering receptor expressed on m     | TREM-B2V2  | 0.796779 | 2       |
| ENSGALT0000 transcriptional regulating factor 1    | TRERF1     | 0.973731 | 1217    |
| ENSGALT0000 thyrotropin-releasing hormone          | TRH        | 0.861519 | 25.5    |
| ENSGALT0000 thyrotropin-releasing hormone deg      | TRHDE      | 0.964851 | 164.5   |
| ENSGALT0000 thyrotropin-releasing hormone rece     | TRHR       | 0.231544 | 4       |
| ENSGALT0000 TP53 regulated inhibitor of apoptos    | TRIAP1     | 0.936699 | 681.5   |
| ENSGALT0000 tribbles homolog 1 (Drosophila)        | TRIB1      | 0.968619 | 110.5   |
| ENSGALT0000 tribbles homolog 2 (Drosophila)        | TRIB2      | 0.954384 | 4082.69 |
| ENSGALT0000 tripartite motif containing 13         | TRIM13     | 0.989629 | 542     |
| ENSGALT0000 tripartite motif containing 14         | TRIM14     | 0.990267 | 156.5   |
| ENSGALT0000 tripartite motif-containing 2          | TRIM2      | 0.795032 | 508     |
| ENSGALT0000 tripartite motif containing 23         | TRIM23     | 0.865575 | 354.5   |
| ENSGALT0000 tripartite motif containing 24         | TRIM24     | 0.973318 | 653     |
| ENSGALT0000 tripartite motif containing 25         | TRIM25     | 0.987134 | 339.5   |
| ENSGALT0000 tripartite motif-containing 27         | TRIM27     | 0.828826 | 5       |
| ENSGALT0000 tripartite motif containing 28         | TRIM28     | 0.974901 | 709.5   |
| ENSGALT0000 tripartite motif containing 29         | TRIM29     | 0.457187 | 3       |
| ENSGALT0000 tripartite motif containing 3          | TRIM3      | 0.771226 | 3934.5  |
| ENSGALT0000 tripartite motif containing 32         | TRIM32     | 0.981584 | 639.5   |
| ENSGALT0000 tripartite motif containing 33         | TRIM33     | 0.969686 | 1448    |
| ENSGALT0000 tripartite motif containing 35         | TRIM35     | 0.551995 | 213.649 |
| ENSGALT0000 tripartite motif containing 36         | TRIM36     | 0.961977 | 537     |
| ENSGALT0000 tripartite motif containing 37         | TRIM37     | 0.95723  | 1788.5  |
| ENSGALT0000 tripartite motif-containing 39         | TRIM39     | 0.920793 | 25.5082 |
| ENSGALT0000 tripartite motif containing 41         | TRIM41     | 0.954096 | 427     |
| ENSGALT0000 tripartite motif containing 42         | TRIM42     | 0.464758 | 0       |
| ENSGALT0000 tripartite motif containing 45         | TRIM45     | 0.966298 | 857     |
| ENSGALT0000 tripartite motif containing 50         | TRIM50     | 0.964702 | 47      |
| ENSGALT0000 tripartite motif containing 55         | TRIM55     | 0.313263 | 1       |
| ENSGALT0000 tripartite motif containing 59         | TRIM59     | 0.991129 | 1138.5  |
| ENSGALT0000 tripartite motif containing 62         | TRIM62     | 0.952584 | 283     |
| ENSGALT0000 tripartite motif containing 63         | TRIM63     | 0.988416 | 276.5   |
| ENSGALT0000 tripartite motif containing 65         | TRIM65     | 0.896354 | 191     |
| ENSGALT0000 tripartite motif containing 66         | TRIM66     | 0.841415 | 112     |

|                                                   |         |          |         |
|---------------------------------------------------|---------|----------|---------|
| ENSGALT0000 tripartite motif containing 67        | TRIM67  | 0.800191 | 244.5   |
| ENSGALT0000 tripartite motif-containing 7         | TRIM7   | 0.973194 | 543.5   |
| ENSGALT0000 tripartite motif containing 71        | TRIM71  | 0.962448 | 601.998 |
| ENSGALT0000 tripartite motif containing 8         | TRIM8   | 0.934685 | 2010.5  |
| ENSGALT0000 tripartite motif containing 9         | TRIM9   | 0.709196 | 217.5   |
| ENSGALT0000 triple functional domain (PTPRF int   | TRIO    | 0.932251 | 4929.68 |
| ENSGALT0000 TRIO and F-actin binding protein      | TRIOBP  | 0.955985 | 1978.5  |
| ENSGALT0000 thyroid hormone receptor interacto    | TRIP11  | 0.990165 | 935.5   |
| ENSGALT0000 thyroid hormone receptor interacto    | TRIP12  | 0.968445 | 6116    |
| ENSGALT0000 thyroid hormone receptor interacto    | TRIP13  | 0.876981 | 279.5   |
| ENSGALT0000 thyroid hormone receptor interacto    | TRIP4   | 0.859534 | 815     |
| ENSGALT0000 tRNA isopentenyltransferase 1         | TRIT1   | 0.919478 | 1087.5  |
| ENSGALT0000 tRNA methyltransferase 11 homolo      | TRMT11  | 0.970906 | 211.063 |
| ENSGALT0000 tRNA methyltransferase 12 homolo      | TRMT12  | 0.919274 | 491.5   |
| ENSGALT0000 TRM1 tRNA methyltransferase 1-lik     | TRMT1L  | 0.990121 | 894     |
| ENSGALT0000 TRM2 tRNA methyltransferase 2 hc      | TRMT2A  | 0.97795  | 1036    |
| ENSGALT0000 TRM2 tRNA methyltransferase 2 hc      | TRMT2B  | 0.87299  | 652     |
| ENSGALT0000 TRM5 tRNA methyltransferase 5 hc      | TRMT5   | 0.939159 | 486.5   |
| ENSGALT0000 tRNA methyltransferase 6 homolog      | TRMT6   | 0.904059 | 609.501 |
| ENSGALT0000 tRNA methyltransferase 61 homolo      | TRMT61A | 0.859738 | 507     |
| ENSGALT0000 tRNA methyltransferase 61 homolo      | TRMT61B | 0.882755 | 404.634 |
| ENSGALT0000 TROVE domain family, member 2         | TROVE2  | 0.954878 | 679.5   |
| ENSGALT0000 transient receptor potential cation c | TRPA1   | 0.938894 | 92.5    |
| ENSGALT0000 transient receptor potential cation c | TRPC1   | 0.990853 | 1110.5  |
| ENSGALT0000 transient receptor potential cation c | TRPC3   | 0.999657 | 128     |
| ENSGALT0000 transient receptor potential cation c | TRPC4   | 0.788621 | 13      |
| ENSGALT0000 transient receptor potential cation c | TRPC4AP | 0.985211 | 3303    |
| ENSGALT0000 transient receptor potential cation c | TRPC5   | 0.94772  | 122.5   |
| ENSGALT0000 transient receptor potential cation c | TRPC6   | 0.980119 | 21.5    |
| ENSGALT0000 transient receptor potential cation c | TRPC7   | 0.812631 | 84.5    |
| ENSGALT0000 transient receptor potential cation c | TRPM1   | 0.856257 | 9       |
| ENSGALT0000 transient receptor potential cation c | TRPM2   | 0.874913 | 163     |
| ENSGALT0000 transient receptor potential cation c | TRPM3   | 0.799554 | 1722.5  |
| ENSGALT0000 transient receptor potential cation c | TRPM5   | 0.449686 | 1.5     |
| ENSGALT0000 transient receptor potential cation c | TRPM6   | 0.745031 | 99.5    |
| ENSGALT0000 transient receptor potential cation c | TRPM7   | 0.992956 | 2050.95 |
| ENSGALT0000 transient receptor potential cation c | TRPM8   | 0.427605 | 9       |
| ENSGALT0000 trichorhinophalangeal syndrome I      | TRPS1   | 0.982815 | 545.998 |
| ENSGALT0000 transient receptor potential cation c | TRPV1   | 0.991375 | 51.5    |
| ENSGALT0000 transient receptor potential cation c | TRPV2   | 0.920076 | 152.5   |
| ENSGALT0000 transient receptor potential cation c | TRPV3   | 0.979341 | 68.5    |
| ENSGALT0000 transient receptor potential cation c | TRPV4   | 0.869716 | 674     |
| ENSGALT0000 transient receptor potential cation c | TRPV6   | ?        | 0       |
| ENSGALT0000 transformation/transcription domair   | TRRAP   | 0.958199 | 7998.79 |
| ENSGALT0000 tRNA selenocysteine associated pr     | TRSPAP1 | 0.968692 | 320.5   |
| ENSGALT0000 TruB pseudouridine (psi) synthase     | TRUB1   | 0.864981 | 332.5   |
| ENSGALT0000 TruB pseudouridine (psi) synthase     | TRUB2   | 0.89243  | 1131    |
| ENSGALT0000 tuberous sclerosis 1                  | TSC1    | 0.945674 | 1079    |
| ENSGALT0000 tuberous sclerosis 2                  | TSC2    | 0.97603  | 3486.5  |
| ENSGALT0000 TSC22 domain family 1 isoform 1       | TSC22D1 | 0.921301 | 1801    |
| ENSGALT0000 TSC22 domain family, member 2         | TSC22D2 | 0.989122 | 309     |
| ENSGALT0000 TSC22 domain family, member 3         | TSC22D3 | 0.656608 | 78.5    |
| ENSGALT0000 tRNA splicing endonuclease 15 hor     | TSEN15  | 0.72452  | 252     |
| ENSGALT0000 tRNA splicing endonuclease 2 hom      | TSEN2   | 0.983573 | 791.5   |
| ENSGALT0000 tRNA splicing endonuclease 54 hor     | TSEN54  | 0.968083 | 917.499 |
| ENSGALT0000 tumor susceptibility gene 101         | TSG101  | 0.932794 | 2351    |

|                                                              |          |          |         |
|--------------------------------------------------------------|----------|----------|---------|
| ENSGALT0000 testis specific, 10                              | TSGA10   | 0.799536 | 7.5     |
| ENSGALT0000 testis specific, 14                              | TSGA14   | 0.946635 | 1057    |
| ENSGALT0000 thyroid stimulating hormone, beta                | TSHB     | 0.603682 | 0       |
| ENSGALT0000 thyroid stimulating hormone receptor             | TSHR     | 0.571217 | 0       |
| ENSGALT0000 teashirt zinc finger homeobox 1                  | TSHZ1    | 0.954482 | 288     |
| ENSGALT0000 teashirt zinc finger homeobox 2                  | TSHZ2    | 0.660232 | 122     |
| ENSGALT0000 Tsukushin                                        | TSKU     | 0.903218 | 297     |
| ENSGALT0000 translin                                         | TSN      | 0.922037 | 3309.41 |
| ENSGALT0000 t-SNARE domain containing 1                      | TSNARE1  | 0.847616 | 126.5   |
| ENSGALT0000 translin-associated factor X                     | TSNAX    | 0.963906 | 968.002 |
| ENSGALT0000 translin-associated factor X interacting protein | TSNAXIP1 | 0.996767 | 35.5    |
| ENSGALT0000 tetraspanin 1                                    | TSPAN1   | 0.954415 | 36.5    |
| ENSGALT0000 tetraspanin 10                                   | TSPAN10  | 0.995045 | 6       |
| ENSGALT0000 tetraspanin 12                                   | TSPAN12  | 0.921659 | 228     |
| ENSGALT0000 tetraspanin 13                                   | TSPAN13  | 0.992753 | 2923.5  |
| ENSGALT0000 tetraspanin 14                                   | TSPAN14  | 0.940811 | 864.5   |
| ENSGALT0000 tetraspanin 15                                   | TSPAN15  | 0.908188 | 435.5   |
| ENSGALT0000 tetraspanin 18                                   | TSPAN18  | 0.946258 | 308     |
| ENSGALT0000 tetraspanin 2                                    | TSPAN2   | 0.934751 | 88.5    |
| ENSGALT0000 tetraspanin 3                                    | TSPAN3   | 0.96418  | 10600.5 |
| ENSGALT0000 tetraspanin 32                                   | TSPAN32  | 0.881598 | 15.5    |
| ENSGALT0000 tetraspanin 4                                    | TSPAN4   | 0.956111 | 423     |
| ENSGALT0000 tetraspanin 5                                    | TSPAN5   | 0.883015 | 643     |
| ENSGALT0000 tetraspanin 6                                    | TSPAN6   | 0.913953 | 5972    |
| ENSGALT0000 tetraspanin 7                                    | TSPAN7   | 0.689249 | 1376    |
| ENSGALT0000 tetraspanin 8                                    | TSPAN8   | ?        | 0       |
| ENSGALT0000 tetraspanin 9                                    | TSPAN9   | 0.992446 | 602     |
| ENSGALT0000 thrombospondin-type laminin G domain             | TSPEAR   | 0.9755   | 94      |
| ENSGALT0000 translocator protein (18kDa)                     | TSPO     | 0.937188 | 1406    |
| ENSGALT0000 translocator protein 2                           | TSPO2    | 0.698697 | 94      |
| ENSGALT0000 TSR1, 20S rRNA accumulation, homolog             | TSR1     | 0.892757 | 1848.5  |
| ENSGALT0000 tumor suppressing subtransferable                | TSSC1    | 0.846432 | 860.999 |
| ENSGALT0000 tumor suppressing subtransferable                | TSSC4    | 0.884604 | 1446    |
| ENSGALT0000 testis-specific serine kinase 3                  | TSSK3    | 0.93105  | 8       |
| ENSGALT0000 testis-specific serine kinase 6                  | TSSK6    | 0.464758 | 0.5     |
| ENSGALT0000 thiosulfate sulfurtransferase (rhodanese)        | TST      | 0.981554 | 1863.53 |
| ENSGALT0000 tissue specific transplantation antigen          | TSTA3    | 0.793117 | 972.5   |
| ENSGALT0000 thiosulfate sulfurtransferase (rhodanese)        | TSTD2    | 0.979673 | 293     |
| ENSGALT0000 tau tubulin kinase 1                             | TTBK1    | 0.91138  | 712     |
| ENSGALT0000 tau tubulin kinase 2                             | TTBK2    | 0.844113 | 367     |
| ENSGALT0000 tetratricopeptide repeat domain 1                | TTC1     | 0.952266 | 880     |
| ENSGALT0000 tetratricopeptide repeat domain 12               | TTC12    | 0.996568 | 677     |
| ENSGALT0000 tetratricopeptide repeat domain 13               | TTC13    | 0.975294 | 340     |
| ENSGALT0000 tetratricopeptide repeat domain 14               | TTC14    | 0.998742 | 1291.5  |
| ENSGALT0000 tetratricopeptide repeat domain 15               | TTC15    | 0.965543 | 928     |
| ENSGALT0000 tetratricopeptide repeat domain 16               | TTC16    | 0.997579 | 59.5    |
| ENSGALT0000 tetratricopeptide repeat domain 17               | TTC17    | 0.965854 | 1340.55 |
| ENSGALT0000 tetratricopeptide repeat domain 18               | TTC18    | 0.914563 | 538.5   |
| ENSGALT0000 tetratricopeptide repeat domain 19               | TTC19    | 0.838468 | 607.333 |
| ENSGALT0000 tetratricopeptide repeat domain 21               | TTC21B   | 0.990108 | 1339.47 |
| ENSGALT0000 tetratricopeptide repeat domain 26               | TTC26    | 0.996827 | 967.5   |
| ENSGALT0000 tetratricopeptide repeat domain 27               | TTC27    | 0.901257 | 1015.5  |
| ENSGALT0000 tetratricopeptide repeat domain 28               | TTC28    | 0.934504 | 3685.5  |
| ENSGALT0000 tetratricopeptide repeat domain 29               | TTC29    | 0.960681 | 19      |
| ENSGALT0000 tetratricopeptide repeat domain 3                | TTC3     | 0.97869  | 1109.5  |
| ENSGALT0000 tetratricopeptide repeat domain 30               | TTC30A   | 0.963374 | 1227    |

|             |                                         |         |          |         |
|-------------|-----------------------------------------|---------|----------|---------|
| ENSGALT0000 | tetratricopeptide repeat domain 32      | TTC32   | 0.887985 | 188.5   |
| ENSGALT0000 | tetratricopeptide repeat domain 33      | TTC33   | 0.913582 | 327     |
| ENSGALT0000 | tetratricopeptide repeat domain 34      | TTC34   | 0.79712  | 17.5    |
| ENSGALT0000 | tetratricopeptide repeat domain 35      | TTC35   | 0.794971 | 767.5   |
| ENSGALT0000 | tetratricopeptide repeat domain 36      | TTC36   | 0.816184 | 33      |
| ENSGALT0000 | tetratricopeptide repeat domain 37      | TTC37   | 0.935202 | 1471.5  |
| ENSGALT0000 | tetratricopeptide repeat domain 38      | TTC38   | 0.980355 | 712.6   |
| ENSGALT0000 | tetratricopeptide repeat domain 39A     | TTC39A  | 0.980337 | 277.5   |
| ENSGALT0000 | tetratricopeptide repeat domain 39B     | TTC39B  | 0.96389  | 166.5   |
| ENSGALT0000 | tetratricopeptide repeat domain 39C     | TTC39C  | 0.968583 | 426.5   |
| ENSGALT0000 | tetratricopeptide repeat domain 4       | TTC4    | 0.780865 | 905.5   |
| ENSGALT0000 | tetratricopeptide repeat domain 6       | TTC6    | 0.773122 | 27      |
| ENSGALT0000 | tetratricopeptide repeat domain 7A      | TTC7A   | 0.962119 | 361.5   |
| ENSGALT0000 | tetratricopeptide repeat domain 7B      | TTC7B   | 0.921181 | 495     |
| ENSGALT0000 | tetratricopeptide repeat domain 8       | TTC8    | 0.892975 | 1032    |
| ENSGALT0000 | tetratricopeptide repeat domain 9       | TTC9    | 0.581235 | 245     |
| ENSGALT0000 | transcription termination factor, RN.   | TTF2    | 0.962436 | 897.995 |
| ENSGALT0000 | Tel2 interacting protein 1 homolog      | TTI1    | 0.975083 | 917.5   |
| ENSGALT0000 | chromosome 8 open reading frame         | TTI2    | 0.867599 | 387.5   |
| ENSGALT0000 | TTK protein kinase                      | TTK     | 0.95165  | 785     |
| ENSGALT0000 | tubulin tyrosine ligase                 | TTL     | 0.896273 | 2227    |
| ENSGALT0000 | tubulin tyrosine ligase-like family, nr | TTLL1   | 0.880054 | 143     |
| ENSGALT0000 | tubulin tyrosine ligase-like family, nr | TTLL11  | 0.979911 | 251     |
| ENSGALT0000 | tubulin tyrosine ligase-like family, nr | TTLL12  | 0.967708 | 3821    |
| ENSGALT0000 | tubulin tyrosine ligase-like family, nr | TTLL5   | 0.974729 | 2655.93 |
| ENSGALT0000 | tubulin tyrosine ligase-like family, nr | TTLL7   | 0.975685 | 584     |
| ENSGALT0000 | tubulin tyrosine ligase-like family, nr | TTLL9   | 0.992952 | 220.5   |
| ENSGALT0000 | titin                                   | TTN     | 0.979934 | 2.5     |
| ENSGALT0000 | tocopherol (alpha) transfer protein     | TTPA    | 0.936714 | 44.5    |
| ENSGALT0000 | tocopherol (alpha) transfer protein-    | TTPAL   | 0.99748  | 893     |
| ENSGALT0000 | transthyretin                           | TTR     | 0.353553 | 1.5     |
| ENSGALT0000 | tweety homolog 3 (Drosophila)           | TTYH3   | 0.946011 | 2276.5  |
| ENSGALT0000 | tubby homolog (mouse)                   | TUB     | 0.972825 | 493     |
| ENSGALT0000 | tubulin, alpha 3e                       | TUBA3E  | 0.87091  | 6397.51 |
| ENSGALT0000 | tubulin, alpha 4a                       | TUBA4A  | 0.23643  | 0.5     |
| ENSGALT0000 | tubulin, alpha 8                        | TUBA8   | 0.547437 | 2       |
| ENSGALT0000 | tubulin, alpha-like 3                   | TUBAL3  | 0.917822 | 4971.95 |
| ENSGALT0000 | tubulin, beta 1                         | TUBB1   | 0.986778 | 475     |
| ENSGALT0000 | tubulin, beta 2B class IIb              | TUBB2B  | 0.09508  | 30358.5 |
| ENSGALT0000 | tubulin, beta 2C                        | TUBB2C  | 0.519661 | 17060.7 |
| ENSGALT0000 | tubulin, beta 6 class V                 | TUBB6   | 0.654359 | 347     |
| ENSGALT0000 | tubulin, delta 1                        | TUBD1   | 0.987067 | 354     |
| ENSGALT0000 | tubulin, epsilon 1                      | TUBE1   | 0.996663 | 191.5   |
| ENSGALT0000 | tubulin, gamma 1                        | TUBG1   | 0.842502 | 2956.5  |
| ENSGALT0000 | tubulin, gamma complex associate        | TUBGCP2 | 0.957692 | 2244.54 |
| ENSGALT0000 | tubulin, gamma complex associate        | TUBGCP3 | 0.99601  | 1764    |
| ENSGALT0000 | tubulin, gamma complex associate        | TUBGCP4 | 0.928576 | 1861    |
| ENSGALT0000 | tubulin, gamma complex associate        | TUBGCP5 | 0.981152 | 854     |
| ENSGALT0000 | tubulin, gamma complex associate        | TUBGCP6 | 0.972447 | 667.003 |
| ENSGALT0000 | tuftelin 1                              | TUFT1   | 0.950884 | 627.5   |
| ENSGALT0000 | tubby like protein 1                    | TULP1   | 0.539038 | 12      |
| ENSGALT0000 | tubby like protein 3                    | TULP3   | 0.969284 | 497.5   |
| ENSGALT0000 | tubby like protein 4                    | TULP4   | 0.925852 | 1272    |
| ENSGALT0000 | tumor suppressor candidate 1            | TUSC1   | 0.313044 | 256.5   |
| ENSGALT0000 | tumor suppressor candidate 2            | TUSC2   | 0.900022 | 861.5   |
| ENSGALT0000 | tumor suppressor candidate 3            | TUSC3   | 0.812652 | 661.001 |

|                                                     |         |           |         |
|-----------------------------------------------------|---------|-----------|---------|
| ENSGALT0000 tumor suppressor candidate 5            | TUSC5   | 0.801029  | 35      |
| ENSGALT0000 twinfilin, actin-binding protein, homol | TWF1    | 0.996212  | 595.997 |
| ENSGALT0000 twinfilin, actin-binding protein, homol | TWF2    | 0.90461   | 4481.59 |
| ENSGALT0000 twist homolog 2 (Drosophila)            | TWIST2  | 0.557021  | 165.5   |
| ENSGALT0000 Twist3                                  | TWIST3  | 0.868856  | 39      |
| ENSGALT0000 TWIST neighbor                          | TWISTNB | 0.82744   | 249     |
| ENSGALT0000 Twisted gastrulation protein homol      | TWSG1   | 0.925213  | 1861    |
| ENSGALT0000 TXK tyrosine kinase                     | TXK     | 0.927729  | 1       |
| ENSGALT0000 taxilin alpha                           | TXLNA   | 0.950005  | 1736    |
| ENSGALT0000 taxilin beta                            | TXLNB   | 0.725097  | 0.5     |
| ENSGALT0000 taxilin gamma                           | TXLNG   | 0.997527  | 612.5   |
| ENSGALT0000 thioredoxin                             | TXN     | 0.0870464 | 5978.5  |
| ENSGALT0000 thioredoxin 2                           | TXN2    | 0.740658  | 2768.98 |
| ENSGALT0000 thioredoxin domain containing 11        | TXNDC11 | 0.961165  | 762     |
| ENSGALT0000 thioredoxin domain containing 12 (c     | TXNDC12 | 0.98308   | 2004    |
| ENSGALT0000 thioredoxin domain containing 15        | TXNDC15 | 0.877692  | 662     |
| ENSGALT0000 thioredoxin domain containing 16        | TXNDC16 | 0.978459  | 1024    |
| ENSGALT0000 thioredoxin domain containing 17        | TXNDC17 | 0.695103  | 1611.5  |
| ENSGALT0000 thioredoxin domain containing 3 (s      | TXNDC3  | 0.649519  | 0.5     |
| ENSGALT0000 thioredoxin domain containing 5 (e      | TXNDC5  | 0.968268  | 5732    |
| ENSGALT0000 thioredoxin domain containing 9         | TXNDC9  | 0.907748  | 828     |
| ENSGALT0000 thioredoxin-like 1                      | TXNL1   | 0.739529  | 1443.5  |
| ENSGALT0000 thioredoxin-like 4A                     | TXNL4A  | 0.588348  | 760     |
| ENSGALT0000 thioredoxin-like 4B                     | TXNL4B  | 0.745636  | 189.5   |
| ENSGALT0000 thioredoxin reductase 1                 | TXNRD1  | 0.981574  | 1055.5  |
| ENSGALT0000 thioredoxin reductase 2                 | TXNRD2  | 0.969033  | 154.5   |
| ENSGALT0000 thioredoxin reductase 3                 | TXNRD3  | 0.977402  | 2517.5  |
| ENSGALT0000 tyrosine kinase 2                       | TYK2    | 0.911244  | 317     |
| ENSGALT0000 thymidylate synthetase                  | TYMS    | 0.847513  | 1596.5  |
| ENSGALT0000 tyrosinase (oculocutaneous albinis      | TYR     | 0.649519  | 2.5     |
| ENSGALT0000 TYRO3 protein tyrosine kinase           | TYRO3   | 0.984438  | 5288    |
| ENSGALT0000 tyrosinase-related protein 1            | TYRP1   | 0.862641  | 6       |
| ENSGALT0000 trypsin domain containing 1             | TYSND1  | 0.901722  | 870.5   |
| ENSGALT0000 tRNA-yW synthesizing protein 1 ho       | TYW1    | 0.968424  | 1008    |
| ENSGALT0000 tRNA-yW synthesizing protein 3 ho       | TYW3    | 0.830433  | 264     |
| ENSGALT0000 tRNA-yW synthesizing protein 5          | TYW5    | 0.927798  | 245.53  |
| ENSGALT0000 U1 spliceosomal RNA                     | U1      | 0.750911  | 306.5   |
| ENSGALT0000 U11 spliceosomal RNA                    | U11     | 0.94691   | 6       |
| ENSGALT0000 U12 minor spliceosomal RNA              | U12     | 0.460161  | 3.5     |
| ENSGALT0000 U2 spliceosomal RNA                     | U2      | 0.973024  | 102.5   |
| ENSGALT0000 U2 small nuclear RNA auxiliary fac      | U2AF1   | 0.92069   | 5519.29 |
| ENSGALT0000 U2 snRNP-associated SURP dom            | U2SURP  | 0.975368  | 2397    |
| ENSGALT0000 Small nucleolar RNA U3                  | U3      | 0.06175   | 351.5   |
| ENSGALT0000 U4 spliceosomal RNA                     | U4      | 0.916047  | 14      |
| ENSGALT0000 U4atac minor spliceosomal RNA           | U4atac  | 0.371997  | 2       |
| ENSGALT0000 U5 spliceosomal RNA                     | U5      | 0.294776  | 9.5     |
| ENSGALT0000 Small nucleolar RNA U54                 | U54     | ?         | 0       |
| ENSGALT0000 U6 spliceosomal RNA                     | U6      | 0.991989  | 108.5   |
| ENSGALT0000 U6atac minor spliceosomal RNA           | U6atac  | 0.588798  | 15.5    |
| ENSGALT0000 U7 small nuclear RNA                    | U7      | 0.464758  | 0       |
| ENSGALT0000 uveal autoantigen with coiled-coil d    | UACA    | 0.980463  | 2220.5  |
| ENSGALT0000 UDP-N-acteylglucosamine pyrophc         | UAP1    | 0.792422  | 1469    |
| ENSGALT0000 UDP-N-acteylglucosamine pyrophc         | UAP1L1  | 0.998305  | 1028.49 |
| ENSGALT0000 ubiquitin-like modifier activating en   | UBA3    | 0.919383  | 1308.32 |
| ENSGALT0000 ubiquitin-like modifier activating en   | UBA5    | 0.965545  | 486     |
| ENSGALT0000 ubiquitin-like modifier activating en   | UBA6    | 0.960667  | 1140    |

|                                                    |           |          |         |
|----------------------------------------------------|-----------|----------|---------|
| ENSGALT0000 ubiquitin-like modifier activating enz | UBA7      | 0.722875 | 1022.5  |
| ENSGALT0000 UBA domain containing 1                | UBAC1     | 0.838341 | 486.5   |
| ENSGALT0000 UBA domain containing 2                | UBAC2     | 0.947404 | 1109.5  |
| ENSGALT0000 ubiquitin associated protein 1         | UBAP1     | 0.987118 | 362     |
| ENSGALT0000 ubiquitin associated protein 2         | UBAP2     | 0.949763 | 784.764 |
| ENSGALT0000 ubiquitin associated protein 2-like    | UBAP2L    | 0.898799 | 6431.17 |
| ENSGALT0000 ubiquitin associated and SH3 domæ      | UBASH3A   | 0.464758 | 0       |
| ENSGALT0000 ubiquitin associated and SH3 domæ      | UBASH3B   | 0.799762 | 326.5   |
| ENSGALT0000 Polyubiquitin-BUbiquitin               | UBB_CHICK | 0.926059 | 508.831 |
| ENSGALT0000 ubiquitin-conjugating enzyme E2A       | UBE2A     | 0.918585 | 537.5   |
| ENSGALT0000 ubiquitin-conjugating enzyme E2C       | UBE2CBP   | 0.891421 | 162     |
| ENSGALT0000 ubiquitin-conjugating enzyme E2D       | UBE2D1    | 0.890528 | 324     |
| ENSGALT0000 ubiquitin-conjugating enzyme E2D       | UBE2D2    | 0.954894 | 865.93  |
| ENSGALT0000 ubiquitin-conjugating enzyme E2D       | UBE2D3    | 0.945073 | 5559.57 |
| ENSGALT0000 ubiquitin-conjugating enzyme E2E       | UBE2E1    | 0.874646 | 1691.52 |
| ENSGALT0000 ubiquitin-conjugating enzyme E2E       | UBE2E3    | 0.933942 | 1941    |
| ENSGALT0000 ubiquitin-conjugating enzyme E2F       | UBE2F     | 0.731108 | 1457    |
| ENSGALT0000 ubiquitin-conjugating enzyme E2G       | UBE2G2    | 0.954298 | 867     |
| ENSGALT0000 ubiquitin-conjugating enzyme E2H       | UBE2H     | 0.98675  | 2550.42 |
| ENSGALT0000 ubiquitin-conjugating enzyme E2I       | UBE2I     | 0.946038 | 2160.99 |
| ENSGALT0000 ubiquitin-conjugating enzyme E2, J     | UBE2J1    | 0.890994 | 503.5   |
| ENSGALT0000 ubiquitin-conjugating enzyme E2, J     | UBE2J2    | 0.90911  | 1516    |
| ENSGALT0000 huntingtin interacting protein 2       | UBE2K     | 0.739653 | 960.491 |
| ENSGALT0000 ubiquitin-conjugating enzyme E2L       | UBE2L3    | 0.885097 | 1691.5  |
| ENSGALT0000 ubiquitin-conjugating enzyme E2N       | UBE2N     | 0.882097 | 3181.52 |
| ENSGALT0000 ubiquitin-conjugating enzyme E2O       | UBE2O     | 0.901429 | 3885.5  |
| ENSGALT0000 ubiquitin-conjugating enzyme E2Q       | UBE2Q2    | 0.995574 | 1163.51 |
| ENSGALT0000 ubiquitin-conjugating enzyme E2Q       | UBE2QL1   | 0.666832 | 588     |
| ENSGALT0000 ubiquitin-conjugating enzyme E2R       | UBE2R2    | 0.944483 | 1938    |
| ENSGALT0000 ubiquitin-conjugating enzyme E2T       | UBE2T     | 0.915423 | 524.5   |
| ENSGALT0000 ubiquitin-conjugating enzyme E2 væ     | UBE2V2    | 0.85331  | 1186.08 |
| ENSGALT0000 ubiquitin-conjugating enzyme E2Z       | UBE2Z     | 0.988221 | 446     |
| ENSGALT0000 ubiquitin protein ligase E3A           | UBE3A     | 0.974699 | 1862    |
| ENSGALT0000 ubiquitin protein ligase E3C           | UBE3C     | 0.978089 | 1141.49 |
| ENSGALT0000 ubiquitination factor E4A              | UBE4A     | 0.941043 | 3175.06 |
| ENSGALT0000 ubiquitination factor E4B              | UBE4B     | 0.95218  | 2988    |
| ENSGALT0000 ubiquitin family domain containing     | UBFD1     | 0.817766 | 786.003 |
| ENSGALT0000 transitional epithelia response prote  | UBIAD1    | 0.940193 | 1750    |
| ENSGALT0000 ubiquitin-like 3                       | UBL3      | 0.990146 | 1356    |
| ENSGALT0000 ubiquitin-like 7 (bone marrow strom    | UBL7      | 0.835594 | 1384.5  |
| ENSGALT0000 ubiquitin-like domain containing CT    | UBLCP1    | 0.951635 | 767.501 |
| ENSGALT0000 ubinuclein 1                           | UBN1      | 0.960255 | 703     |
| ENSGALT0000 ubinuclein 2                           | UBN2      | 0.996917 | 1367    |
| ENSGALT0000 U-box domain containing 5              | UBOX5     | 0.946908 | 673     |
| ENSGALT0000 upstream binding protein 1 (LBP-1æ     | UBP1      | 0.973412 | 1610.51 |
| ENSGALT0000 ubiquilin 1                            | UBQLN1    | 0.925465 | 987.5   |
| ENSGALT0000 ubiquilin 4                            | UBQLN4    | 0.914226 | 6844.02 |
| ENSGALT0000 ubiquitin protein ligase E3 componæ    | UBR1      | 0.969193 | 1604    |
| ENSGALT0000 ubiquitin protein ligase E3 componæ    | UBR2      | 0.969381 | 1693.02 |
| ENSGALT0000 ubiquitin protein ligase E3 componæ    | UBR4      | 0.976569 | 11165.5 |
| ENSGALT0000 ubiquitin domain containing 1          | UBTD1     | 0.631621 | 259.5   |
| ENSGALT0000 ubiquitin domain containing 2          | UBTD2     | 0.951932 | 801     |
| ENSGALT0000 UBX domain protein 10                  | UBXN10    | 0.965992 | 130     |
| ENSGALT0000 UBX domain protein 11                  | UBXN11    | 0.763305 | 19      |
| ENSGALT0000 UBX domain protein 2A                  | UBXN2A    | 0.97902  | 567.5   |
| ENSGALT0000 UBX domain protein 2B                  | UBXN2B    | 0.902878 | 345.501 |

|             |                                        |           |           |         |
|-------------|----------------------------------------|-----------|-----------|---------|
| ENSGALT0000 | UBX domain protein 4                   | UBXN4     | 0.911869  | 2220    |
| ENSGALT0000 | UBX domain protein 6                   | UBXN6     | 0.899731  | 540     |
| ENSGALT0000 | UBX domain protein 7                   | UBXN7     | 0.987829  | 839     |
| ENSGALT0000 | ubiquitin carboxyl-terminal esterase   | UCHL1     | 0.0530368 | 5185    |
| ENSGALT0000 | ubiquitin carboxyl-terminal esterase   | UCHL3     | 0.832344  | 912     |
| ENSGALT0000 | ubiquitin carboxyl-terminal hydrolase  | UCHL5     | 0.784948  | 1185.5  |
| ENSGALT0000 | uridine-cytidine kinase 1              | UCK1      | 0.945099  | 1409.5  |
| ENSGALT0000 | uridine-cytidine kinase 2              | UCK2      | 0.619287  | 742.5   |
| ENSGALT0000 | uridine-cytidine kinase 1-like 1       | UCKL1     | 0.96267   | 306.5   |
| ENSGALT0000 | urocortin 3 (stresscopin)              | UCN3      | 0.778348  | 2       |
| ENSGALT0000 | uncoupling protein 3 (mitochondrial    | UCP3      | 0.976949  | 49.5    |
| ENSGALT0000 | UEV and lactate/malate dehydrogen      | UEVLD     | 0.965547  | 475     |
| ENSGALT0000 | ubiquitin fusion degradation 1 like (  | UFD1L     | 0.873383  | 2058    |
| ENSGALT0000 | ubiquitin-fold modifier 1              | UFM1      | 0.951284  | 1241.99 |
| ENSGALT0000 | UFM1-specific peptidase 2              | UFSP2     | 0.936715  | 1241    |
| ENSGALT0000 | UDP-glucose ceramide glucosyltra       | UGCG      | 0.947117  | 302     |
| ENSGALT0000 | UDP-glucose 6-dehydrogenase            | UGDH      | 0.947605  | 1828.5  |
| ENSGALT0000 | UDP-glucose glycoprotein glucosyl      | UGGT1     | 0.942999  | 3209.44 |
| ENSGALT0000 | UDP-glucose glycoprotein glucosyl      | UGGT2     | 0.957435  | 707.004 |
| ENSGALT0000 | UDP-glucose pyrophosphorylase 2        | UGP2      | 0.984637  | 1490    |
| ENSGALT0000 | UDP glucuronosyltransferase 1 far      | UGT1A1    | 0.722096  | 0.5     |
| ENSGALT0000 | UDP glucuronosyltransferase 2 far      | UGT2A3    | 0.348675  | 2       |
| ENSGALT0000 | UDP glycosyltransferase 8              | UGT8      | 0.950902  | 1086    |
| ENSGALT0000 | U2AF homology motif (UHM) kinas        | UHMK1     | 0.94531   | 581     |
| ENSGALT0000 | ubiquitin-like with PHD and ring finç  | UHRF1     | 0.920325  | 1356.5  |
| ENSGALT0000 | UHRF1 binding protein 1                | UHRF1BP1  | 0.992199  | 2256.5  |
| ENSGALT0000 | UHRF1 binding protein 1-like           | UHRF1BP1L | 0.954432  | 761     |
| ENSGALT0000 | ubiquitin-like with PHD and ring finç  | UHRF2     | 0.979148  | 1551.5  |
| ENSGALT0000 | ubiquitin interaction motif containinç | UIMC1     | 0.976781  | 857.99  |
| ENSGALT0000 | unc-51-like kinase 1 (C. elegans)      | ULK1      | 0.980842  | 862.5   |
| ENSGALT0000 | unc-51-like kinase 2 (C. elegans)      | ULK2      | 0.948483  | 2178.5  |
| ENSGALT0000 | uromodulin-like 1                      | UMODL1    | 0.927977  | 23      |
| ENSGALT0000 | uridine monophosphate synthetase       | UMPS      | 0.871736  | 2001    |
| ENSGALT0000 | unc-119 homolog (C. elegans)           | UNC119    | 0.891874  | 133     |
| ENSGALT0000 | unc-119 homolog B (C. elegans)         | UNC119B   | 0.998495  | 1829    |
| ENSGALT0000 | unc-13 homolog B (C. elegans)          | UNC13B    | 0.989567  | 1928.98 |
| ENSGALT0000 | unc-13 homolog C (C. elegans)          | UNC13C    | 0.834862  | 89      |
| ENSGALT0000 | unc-13 homolog D (C. elegans)          | UNC13D    | 0.846714  | 82      |
| ENSGALT0000 | unc-45 homolog A (C. elegans)          | UNC45A    | 0.906037  | 2605.5  |
| ENSGALT0000 | unc-45 homolog B (C. elegans)          | UNC45B    | 0.821187  | 1.5     |
| ENSGALT0000 | unc-50 homolog (C. elegans)            | UNC50     | 0.830877  | 1022.5  |
| ENSGALT0000 | unc-5 homolog A (C. elegans)           | UNC5A     | 0.630499  | 637.502 |
| ENSGALT0000 | unc-5 homolog B (C. elegans)           | UNC5B     | 0.838689  | 3347.92 |
| ENSGALT0000 | unc-5 homolog C (C. elegans)           | UNC5C     | 0.932534  | 3169.93 |
| ENSGALT0000 | unc-5 homolog D (C. elegans)           | UNC5D     | 0.706634  | 116.5   |
| ENSGALT0000 | unc-80 homolog (C. elegans)            | UNC80     | 0.774528  | 404     |
| ENSGALT0000 | unc-93 homolog A (C. elegans)          | UNC93A    | 0.603682  | 0       |
| ENSGALT0000 | uracil-DNA glycosylase                 | UNG       | 0.745655  | 1074.29 |
| ENSGALT0000 | unkempt homolog (Drosophila)           | UNK       | 0.997554  | 1126    |
| ENSGALT0000 | unkempt homolog (Drosophila)-like      | UNKL      | 0.974672  | 407     |
| ENSGALT0000 | ureidopropionase, beta                 | UPB1      | 0.915271  | 6       |
| ENSGALT0000 | UPF1 regulator of nonsense transc      | UPF1      | 0.974494  | 4750.59 |
| ENSGALT0000 | UPF2 regulator of nonsense transc      | UPF2      | 0.997508  | 2336.5  |
| ENSGALT0000 | UPF3 regulator of nonsense transc      | UPF3A     | 0.845745  | 22.5    |
| ENSGALT0000 | UPF3 regulator of nonsense transc      | UPF3B     | 0.916922  | 1562.96 |
| ENSGALT0000 | uroplakin 1B                           | UPK1B     | 0.948339  | 1040.5  |

|                                                         |        |          |         |
|---------------------------------------------------------|--------|----------|---------|
| ENSGALT0000 uroplakin 3A                                | UPK3A  | 0.278927 | 6       |
| ENSGALT0000 uroplakin 3B                                | UPK3B  | 0.94047  | 15      |
| ENSGALT0000 uroplakin 3B-like                           | UPK3BL | 0.965976 | 3564.5  |
| ENSGALT0000 uridine phosphorylase 1                     | UPP1   | 0.916169 | 785.5   |
| ENSGALT0000 uridine phosphorylase 2                     | UPP2   | 0.762661 | 4.5     |
| ENSGALT0000 uracil phosphoribosyltransferase (FUPRT     |        | 0.903658 | 508     |
| ENSGALT0000 ubiquinol-cytochrome c reductase c UQCC     |        | 0.866125 | 936.5   |
| ENSGALT0000 ubiquinol-cytochrome c reductase, UQCR10    |        | 0.470498 | 4484    |
| ENSGALT0000 ubiquinol-cytochrome c reductase, UQCR11    |        | 0.201779 | 1346    |
| ENSGALT0000 ubiquinol-cytochrome c reductase t UQCRB    |        | 0.60608  | 1586.5  |
| ENSGALT0000 ubiquinol-cytochrome c reductase c UQCRC1   |        | 0.766579 | 5247.5  |
| ENSGALT0000 ubiquinol-cytochrome c reductase c UQCRC2   |        | 0.764882 | 5492.5  |
| ENSGALT0000 ubiquinol-cytochrome c reductase, UQCRFS1   |        | 0.613182 | 4160    |
| ENSGALT0000 ubiquinol-cytochrome c reductase t UQCRH    |        | 0.295693 | 5660.5  |
| ENSGALT0000 ubiquinol-cytochrome c reductase, UQCRQ     |        | 0.096818 | 2938.5  |
| ENSGALT0000 URB1 ribosome biogenesis 1 homc URB1        |        | 0.969969 | 1249    |
| ENSGALT0000 URB2 ribosome biogenesis 2 homc URB2        |        | 0.950247 | 973     |
| ENSGALT0000 URI1, prefoldin-like chaperone              | URI1   | 0.964039 | 1790.5  |
| ENSGALT0000 ubiquitin related modifier 1                | URM1   | 0.814096 | 3697.5  |
| ENSGALT0000 urocanase domain containing 1               | UROC1  | 0.99475  | 49      |
| ENSGALT0000 uroporphyrinogen decarboxylase              | UROD   | 0.688778 | 1085.5  |
| ENSGALT0000 uroporphyrinogen III synthase               | UROS   | 0.892002 | 313     |
| ENSGALT0000 unconventional SNARE in the ER 1 USE1       |        | 0.810056 | 738.998 |
| ENSGALT0000 upstream stimulatory factor 1               | USF1   | 0.394307 | 2317.96 |
| ENSGALT0000 Usher syndrome 1C (autosomal rec USH1C      |        | 0.980585 | 1648.01 |
| ENSGALT0000 Usher syndrome 1G (autosomal rec USH1G      |        | 0.790584 | 130     |
| ENSGALT0000 Usher syndrome 2A (autosomal rec USH2A      |        | 0.744444 | 62.5    |
| ENSGALT0000 USO1 vesicle docking protein homc USO1      |        | 0.95316  | 4409.5  |
| ENSGALT0000 ubiquitin specific peptidase 1              | USP1   | 0.963189 | 1575.01 |
| ENSGALT0000 ubiquitin specific peptidase 10             | USP10  | 0.930087 | 3594.57 |
| ENSGALT0000 ubiquitin specific peptidase 12             | USP12  | 0.918418 | 48.212  |
| ENSGALT0000 ubiquitin specific peptidase 12 pse USP12P1 |        | 0.942797 | 1212.79 |
| ENSGALT0000 ubiquitin specific peptidase 13 (iso USP13  |        | 0.988731 | 234.5   |
| ENSGALT0000 ubiquitin specific peptidase 14 (tRN USP14  |        | 0.848584 | 1820    |
| ENSGALT0000 ubiquitin specific peptidase 15             | USP15  | 0.936972 | 895.992 |
| ENSGALT0000 ubiquitin specific peptidase 16             | USP16  | 0.964129 | 1047.13 |
| ENSGALT0000 ubiquitin specific peptidase 18             | USP18  | 0.937594 | 201     |
| ENSGALT0000 ubiquitin specific peptidase 19             | USP19  | 0.945926 | 1926.5  |
| ENSGALT0000 ubiquitin specific peptidase 2              | USP2   | 0.926597 | 571.502 |
| ENSGALT0000 ubiquitin specific peptidase 20             | USP20  | 0.967975 | 1513.5  |
| ENSGALT0000 ubiquitin specific peptidase 22             | USP22  | 0.975052 | 2516.5  |
| ENSGALT0000 ubiquitin specific peptidase 24             | USP24  | 0.97545  | 4176.19 |
| ENSGALT0000 ubiquitin specific peptidase 25             | USP25  | 0.960933 | 777.003 |
| ENSGALT0000 ubiquitin specific peptidase 28             | USP28  | 0.961968 | 1433    |
| ENSGALT0000 ubiquitin specific peptidase 3              | USP3   | 0.94636  | 1372.5  |
| ENSGALT0000 ubiquitin specific peptidase 30             | USP30  | 0.976313 | 233.517 |
| ENSGALT0000 ubiquitin specific peptidase 32             | USP32  | 0.95028  | 823.5   |
| ENSGALT0000 ubiquitin specific peptidase 33             | USP33  | 0.963111 | 980     |
| ENSGALT0000 ubiquitin specific peptidase 34             | USP34  | 0.986855 | 2851.5  |
| ENSGALT0000 ubiquitin specific peptidase 35             | USP35  | 0.901417 | 86.5    |
| ENSGALT0000 ubiquitin specific peptidase 37             | USP37  | 0.980938 | 892.997 |
| ENSGALT0000 ubiquitin specific peptidase 38             | USP38  | 0.984037 | 946     |
| ENSGALT0000 ubiquitin specific peptidase 4 (protc USP4  |        | 0.938773 | 2358.04 |
| ENSGALT0000 ubiquitin specific peptidase 40             | USP40  | 0.998006 | 364.5   |
| ENSGALT0000 ubiquitin specific peptidase 42             | USP42  | 0.993014 | 933     |
| ENSGALT0000 ubiquitin specific peptidase 43             | USP43  | 0.974254 | 266     |



|                                                                           |        |           |         |
|---------------------------------------------------------------------------|--------|-----------|---------|
| ENSGALT0000 ubiquitin specific peptidase 44                               | USP44  | 0.990671  | 1080    |
| ENSGALT0000 ubiquitin specific peptidase 45                               | USP45  | 0.987722  | 840.997 |
| ENSGALT0000 ubiquitin specific peptidase 46                               | USP46  | 0.883306  | 1166    |
| ENSGALT0000 ubiquitin specific peptidase 47                               | USP47  | 0.965965  | 1864    |
| ENSGALT0000 ubiquitin specific peptidase 48                               | USP48  | 0.951018  | 2438.5  |
| ENSGALT0000 ubiquitin specific peptidase 5 (isopeptidase)                 | USP5   | 0.836332  | 5231    |
| ENSGALT0000 ubiquitin specific protease 52                                | USP52  | 0.98827   | 2722.5  |
| ENSGALT0000 ubiquitin specific peptidase 53                               | USP53  | 0.957912  | 261.501 |
| ENSGALT0000 ubiquitin specific peptidase 54                               | USP54  | 0.973107  | 902     |
| ENSGALT0000 USP6 N-terminal like                                          | USP6NL | 0.865056  | 406.514 |
| ENSGALT0000 ubiquitin specific peptidase 7 (herpesvirus thymidine kinase) | USP7   | 0.968533  | 3630.05 |
| ENSGALT0000 ubiquitin specific peptidase 8                                | USP8   | 0.977516  | 1327.5  |
| ENSGALT0000 ubiquitin specific peptidase 9, X-linked                      | USP9X  | 0.957455  | 5963.47 |
| ENSGALT0000 ubiquitin specific peptidase like 1                           | USPL1  | 0.994225  | 2541.5  |
| ENSGALT0000 uronyl-2-sulfotransferase                                     | UST    | 0.992557  | 359.5   |
| ENSGALT0000 UTP11-like, U3 small nucleolar ribosomal protein              | UTP11L | 0.882831  | 838.5   |
| ENSGALT0000 U3 small nucleolar RNA-associated protein                     | UTP15  | 0.897203  | 808     |
| ENSGALT0000 UTP18 small subunit (SSU) processing factor                   | UTP18  | 0.786871  | 727.5   |
| ENSGALT0000 UTP20, small subunit (SSU) processing factor                  | UTP20  | 0.903325  | 1794.54 |
| ENSGALT0000 UTP23, small subunit (SSU) processing factor                  | UTP23  | 0.876621  | 218.5   |
| ENSGALT0000 UTP3, small subunit (SSU) processing factor                   | UTP3   | 0.946312  | 525.5   |
| ENSGALT0000 UTP6, small subunit (SSU) processing factor                   | UTP6   | 0.934056  | 888.504 |
| ENSGALT0000 utrophin                                                      | UTRN   | 0.981288  | 3821    |
| ENSGALT0000 urotensin 2                                                   | UTS2   | 0.898356  | 0.5     |
| ENSGALT0000 urotensin 2 domain containing                                 | UTS2D  | 0.0523832 | 1       |
| ENSGALT0000 urotensin 2 receptor                                          | UTS2R  | 0.511741  | 5.57331 |
| ENSGALT0000 UV radiation resistance associated protein                    | UVRAG  | 0.993551  | 298.001 |
| ENSGALT0000 UDP-glucuronate decarboxylase 1                               | UXS1   | 0.897714  | 537.5   |
| ENSGALT0000 Vac14 homolog (S. cerevisiae)                                 | VAC14  | 0.873235  | 1921    |
| ENSGALT0000 vesicle-associated membrane protein 1                         | VAMP1  | 0.990557  | 92.5    |
| ENSGALT0000 vesicle-associated membrane protein 2                         | VAMP2  | 0.958383  | 24.5    |
| ENSGALT0000 vesicle-associated membrane protein 3                         | VAMP3  | 0.742529  | 1583.5  |
| ENSGALT0000 vesicle-associated membrane protein 4                         | VAMP4  | 0.821864  | 1006.5  |
| ENSGALT0000 vesicle-associated membrane protein 7                         | VAMP7  | 0.948775  | 479.5   |
| ENSGALT0000 vang-like 1 (van gogh, Drosophila)                            | VANGL1 | 0.985191  | 578.5   |
| ENSGALT0000 vang-like 2 (van gogh, Drosophila)                            | VANGL2 | 0.914784  | 2439    |
| ENSGALT0000 VAMP (vesicle-associated membrane protein)                    | VAPA   | 0.865698  | 2223.98 |
| ENSGALT0000 VAMP (vesicle-associated membrane protein)                    | VAPB   | 0.92897   | 1142    |
| ENSGALT0000 vasohibin 1                                                   | VASH1  | 0.947159  | 4102.5  |
| ENSGALT0000 vasohibin 2                                                   | VASH2  | 0.875135  | 615     |
| ENSGALT0000 vasorin                                                       | VASN   | 0.859729  | 1493.5  |
| ENSGALT0000 vesicle amine transport protein 1 homolog                     | VAT1   | 0.815965  | 1987    |
| ENSGALT0000 vesicle amine transport protein 1 homolog                     | VAT1L  | 0.9202    | 231     |
| ENSGALT0000 Vault RNA                                                     | Vault  | 0.534404  | 0.5     |
| ENSGALT0000 vav 2 guanine nucleotide exchange factor                      | VAV2   | 0.853841  | 3061    |
| ENSGALT0000 vav 3 guanine nucleotide exchange factor                      | VAV3   | 0.984528  | 1042    |
| ENSGALT0000 ventral anterior homeobox 1                                   | VAX1   | 0.712429  | 6       |
| ENSGALT0000 von Hippel-Lindau binding protein 1                           | VBP1   | 0.847595  | 719     |
| ENSGALT0000 vascular cell adhesion molecule 1                             | VCAM1  | 0.965908  | 37      |
| ENSGALT0000 versican                                                      | VCAN   | 0.842166  | 2916    |
| ENSGALT0000 vinculin                                                      | VCL    | 0.880534  | 3705    |
| ENSGALT0000 valosin containing protein                                    | VCP    | 0.849357  | 10569.1 |
| ENSGALT0000 valosin containing protein (p97)/p4                           | VCPIP1 | 0.944531  | 584     |
| ENSGALT0000 voltage-dependent anion channel 1                             | VDAC1  | 0.982322  | 2308    |
| ENSGALT0000 voltage-dependent anion channel 2                             | VDAC2  | 0.89877   | 7868.93 |
| ENSGALT0000 voltage-dependent anion channel 3                             | VDAC3  | 0.812616  | 2843.5  |

|                                                                 |          |         |
|-----------------------------------------------------------------|----------|---------|
| ENSGALT0000 vitamin D (1,25- dihydroxyvitamin [VDR              | 0.852502 | 33.5    |
| ENSGALT0000 vascular endothelial growth factor (VEGFA           | 0.993417 | 428.5   |
| ENSGALT0000 vascular endothelial growth factor (VEGFC           | 0.970478 | 247     |
| ENSGALT0000 VENT homeobox VENTX                                 | 0.540722 | 2.5     |
| ENSGALT0000 ventricular zone expressed PH domain VEPH1          | 0.71206  | 92      |
| ENSGALT0000 vascular endothelial zinc finger 1 VEZF1            | 0.974381 | 1864.51 |
| ENSGALT0000 vezatin, adherens junctions transmembrane VEZT      | 0.941239 | 770.725 |
| ENSGALT0000 vestigial like 1 (Drosophila) VGLL1                 | 0.846336 | 1.5     |
| ENSGALT0000 vestigial like 2 (Drosophila) VGLL2                 | 0.315365 | 8.5     |
| ENSGALT0000 vestigial like 3 (Drosophila) VGLL3                 | 0.622295 | 59      |
| ENSGALT0000 vestigial like 4 (Drosophila) VGLL4                 | 0.95903  | 3238.5  |
| ENSGALT0000 von Hippel-Lindau tumor suppressor VHL              | 0.755202 | 1451    |
| ENSGALT0000 villin 1 VIL1                                       | 0.632377 | 122.5   |
| ENSGALT0000 villin-like VILL                                    | 0.967685 | 2790    |
| ENSGALT0000 vimentin VIM                                        | 0.647023 | 42035.5 |
| ENSGALT0000 vasoactive intestinal peptide VIP                   | 0.113706 | 62      |
| ENSGALT0000 VPS33B interacting protein, apical- VIPAR           | 0.939442 | 1200.5  |
| ENSGALT0000 vasoactive intestinal peptide receptor VIPR1        | 0.917438 | 152.5   |
| ENSGALT0000 vasoactive intestinal peptide receptor VIPR2        | 0.925236 | 11.5    |
| ENSGALT0000 vitrin VIT                                          | 0.800197 | 2.5     |
| ENSGALT0000 Vitellogenin-3 Phosvitin VIT3_CHICK                 | 0.856518 | 7.5     |
| ENSGALT0000 vitamin K epoxide reductase complex VKORC1L1        | 0.88824  | 331     |
| ENSGALT0000 very low density lipoprotein receptor VLDLR         | 0.855259 | 420     |
| ENSGALT0000 VMA21 vacuolar H <sup>+</sup> -ATPase homolog VMA21 | 0.973011 | 1206    |
| ENSGALT0000 vitelline membrane outer layer 1 homolog VMO1       | 0.421875 | 1       |
| ENSGALT0000 vacuole membrane protein 1 VMP1                     | 0.957385 | 1166.5  |
| ENSGALT0000 vanin 1 VNN1                                        | 0.987121 | 68.5    |
| ENSGALT0000 vesicular, overexpressed in cancer, VOPP1           | 0.854294 | 53      |
| ENSGALT0000 Vpr (HIV-1) binding protein VPRBP                   | 0.978338 | 2172.5  |
| ENSGALT0000 pre-B lymphocyte 3 VPREB3                           | 0.689337 | 1       |
| ENSGALT0000 vacuolar protein sorting 11 homolog VPS11           | 0.924793 | 1970    |
| ENSGALT0000 vacuolar protein sorting 13 homolog VPS13A          | 0.979177 | 653     |
| ENSGALT0000 vacuolar protein sorting 13 homolog VPS13B          | 0.982569 | 1828.5  |
| ENSGALT0000 vacuolar protein sorting 13 homolog VPS13C          | 0.972349 | 1184.5  |
| ENSGALT0000 vacuolar protein sorting 13 homolog VPS13D          | 0.991247 | 2092.54 |
| ENSGALT0000 vacuolar protein sorting 16 homolog VPS16           | 0.825799 | 4570.5  |
| ENSGALT0000 vacuolar protein sorting 18 homolog VPS18           | 0.932069 | 964     |
| ENSGALT0000 vacuolar protein sorting 24 homolog VPS24           | 0.768383 | 1498.5  |
| ENSGALT0000 vacuolar protein sorting 25 homolog VPS25           | 0.739226 | 1576    |
| ENSGALT0000 vacuolar protein sorting 26 homolog VPS26A          | 0.981647 | 844     |
| ENSGALT0000 vacuolar protein sorting 26 homolog VPS26B          | 0.968852 | 1561    |
| ENSGALT0000 vacuolar protein sorting 29 VPS29                   | 0.886186 | 2539.03 |
| ENSGALT0000 vacuolar protein sorting 33 homolog VPS33A          | 0.845548 | 1366    |
| ENSGALT0000 vacuolar protein sorting 33 homolog VPS33B          | 0.852629 | 3937.13 |
| ENSGALT0000 vacuolar protein sorting 35 homolog VPS35           | 0.961067 | 2819    |
| ENSGALT0000 vacuolar protein sorting 36 homolog VPS36           | 0.954236 | 845     |
| ENSGALT0000 vacuolar protein sorting 37 homolog VPS37A          | 0.954948 | 302.088 |
| ENSGALT0000 vacuolar protein sorting 37 homolog VPS37B          | 0.821258 | 712.5   |
| ENSGALT0000 vacuolar protein sorting 37 homolog VPS37C          | 0.889155 | 734.5   |
| ENSGALT0000 vacuolar protein sorting 39 homolog VPS39           | 0.983542 | 870.51  |
| ENSGALT0000 vacuolar protein sorting 41 homolog VPS41           | 0.964005 | 1567.98 |
| ENSGALT0000 vacuolar protein sorting 45A VPS45                  | 0.896599 | 2010    |
| ENSGALT0000 vacuolar protein sorting 4 homolog VPS4A            | 0.906297 | 1235.83 |
| ENSGALT0000 vacuolar protein sorting 4 homolog VPS4B            | 0.946271 | 1609    |
| ENSGALT0000 vacuolar protein sorting 53 homolog VPS53           | 0.936559 | 2750.5  |
| ENSGALT0000 vacuolar protein sorting 54 homolog VPS54           | 0.941107 | 1211.5  |

|                                                              |         |          |         |
|--------------------------------------------------------------|---------|----------|---------|
| ENSGALT0000 vacuolar protein sorting 72 homolog              | VPS72   | 0.425906 | 4049    |
| ENSGALT0000 vacuolar protein sorting 8 homolog               | VPS8    | 0.938124 | 2993    |
| ENSGALT0000 vaccinia related kinase 1                        | VRK1    | 0.965215 | 599     |
| ENSGALT0000 vaccinia related kinase 2                        | VRK2    | 0.975733 | 241.606 |
| ENSGALT0000 vaccinia related kinase 3                        | VRK3    | 0.991406 | 985     |
| ENSGALT0000 V-set and immunoglobulin domain                  | VSIG1   | 0.464758 | 0.5     |
| ENSGALT0000 V-set and immunoglobulin domain                  | VSIG10  | 0.969048 | 1499    |
| ENSGALT0000 V-set and immunoglobulin domain                  | VSIG4   | 0.464758 | 0       |
| ENSGALT0000 visinin-like 1                                   | VSNL1   | 0.921865 | 848     |
| ENSGALT0000 V-set and transmembrane domain                   | VSTM2A  | 0.410121 | 101.5   |
| ENSGALT0000 V-set and transmembrane domain                   | VSTM2B  | 0.764603 | 236.5   |
| ENSGALT0000 V-set and transmembrane domain                   | VSTM2L  | 0.242543 | 446.5   |
| ENSGALT0000 V-set and transmembrane domain                   | VSTM4   | 0.988451 | 211     |
| ENSGALT0000 V-set and transmembrane domain                   | VSTM5   | 0.878922 | 146.5   |
| ENSGALT0000 visual system homeobox 1                         | VSX1    | 0.711147 | 8       |
| ENSGALT0000 visual system homeobox 2                         | VSX2    | 0.539038 | 0       |
| ENSGALT0000 Vps20-associated 1 homolog (S. cerevisiae)       | VTA1    | 0.918118 | 1208    |
| ENSGALT0000 V-set domain containing T cell activation domain | VTCN1   | 0.427997 | 4       |
| ENSGALT0000 vitellogenin 2                                   | VTG2    | 0.982719 | 324.001 |
| ENSGALT0000 vesicle transport through interaction            | VTI1A   | 0.753532 | 387     |
| ENSGALT0000 vesicle transport through interaction            | VTI1B   | 0.95956  | 790.677 |
| ENSGALT0000 vitronectin                                      | VTN     | 0.820333 | 1192.49 |
| ENSGALT0000 von Willebrand factor A domain core              | VWA1    | 0.939864 | 100     |
| ENSGALT0000 von Willebrand factor A domain core              | VWA2    | 0.391028 | 255     |
| ENSGALT0000 von Willebrand factor A domain core              | VWA3A   | 0.721717 | 56      |
| ENSGALT0000 von Willebrand factor A domain core              | VWA3B   | 0.95625  | 49      |
| ENSGALT0000 von Willebrand factor A domain core              | VWA5A   | 0.828268 | 202.5   |
| ENSGALT0000 von Willebrand factor A domain core              | VWA5B1  | 0.993064 | 308     |
| ENSGALT0000 von Willebrand factor A domain core              | VWA5B2  | 0.969438 | 128     |
| ENSGALT0000 von Willebrand factor C domain core              | VWC2    | 0.971194 | 293     |
| ENSGALT0000 von Willebrand factor C domain core              | VWC2L   | 0.992423 | 138     |
| ENSGALT0000 von Willebrand factor D and EGF domain           | VWDE    | 0.453981 | 216     |
| ENSGALT0000 von Willebrand factor                            | VWF     | 0.864258 | 318     |
| ENSGALT0000 WW domain containing adaptor                     | WAC     | 0.977434 | 1981    |
| ENSGALT0000 wings apart-like homolog (Drosophila)            | WAPAL   | 0.97876  | 2212.46 |
| ENSGALT0000 tryptophanyl-tRNA synthetase                     | WARS    | 0.986909 | 1056    |
| ENSGALT0000 WAS protein family, member 1                     | WASF1   | 0.983354 | 1849.5  |
| ENSGALT0000 WAS protein family, member 2                     | WASF2   | 0.955766 | 1311    |
| ENSGALT0000 WAS protein family, member 3                     | WASF3   | 0.967489 | 245.5   |
| ENSGALT0000 WAS protein family homolog 1                     | WASH1   | 0.962354 | 1342    |
| ENSGALT0000 Wiskott-Aldrich syndrome-like                    | WASL    | 0.965696 | 1055.58 |
| ENSGALT0000 WW domain binding protein 11                     | WBP11   | 0.902368 | 2382    |
| ENSGALT0000 WW domain binding protein 2                      | WBP2    | 0.808699 | 386     |
| ENSGALT0000 WW domain binding protein 4 (form 1)             | WBP4    | 0.987476 | 1545.5  |
| ENSGALT0000 Williams-Beuren syndrome chromosome 7 region     | WBSCR16 | 0.916686 | 488.5   |
| ENSGALT0000 Williams-Beuren syndrome chromosome 7 region     | WBSCR17 | 0.768349 | 881     |
| ENSGALT0000 Williams-Beuren syndrome chromosome 7 region     | WBSCR22 | 0.758743 | 838     |
| ENSGALT0000 WD repeat and FYVE domain containing             | WDFY1   | 0.974526 | 2902    |
| ENSGALT0000 WD repeat and FYVE domain containing             | WDFY2   | 0.879668 | 841     |
| ENSGALT0000 WD repeat and FYVE domain containing             | WDFY3   | 0.972082 | 5646.97 |
| ENSGALT0000 WDFY family member 4                             | WDFY4   | 0.655225 | 1.5     |
| ENSGALT0000 WD repeat and HMG-box DNA binding                | WDHD1   | 0.893676 | 785.5   |
| ENSGALT0000 WD repeat containing planar cell polarity        | WDPCP   | 0.997848 | 148.5   |
| ENSGALT0000 WD repeat domain 1                               | WDR1    | 0.987792 | 4610.93 |
| ENSGALT0000 WD repeat domain 11                              | WDR11   | 0.949363 | 1793.5  |
| ENSGALT0000 WD repeat domain 12                              | WDR12   | 0.887083 | 1776.5  |

|                                                 |         |          |         |
|-------------------------------------------------|---------|----------|---------|
| ENSGALT0000 WD repeat domain 16                 | WDR16   | 0.981768 | 198     |
| ENSGALT0000 WD repeat domain 17                 | WDR17   | 0.844103 | 143.5   |
| ENSGALT0000 WD repeat domain 18                 | WDR18   | 0.928717 | 536.5   |
| ENSGALT0000 WD repeat domain 19                 | WDR19   | 0.97482  | 672     |
| ENSGALT0000 WD repeat domain 20                 | WDR20   | 0.968822 | 431     |
| ENSGALT0000 WD repeat domain 24                 | WDR24   | 0.842735 | 2290.5  |
| ENSGALT0000 WD repeat domain 25                 | WDR25   | 0.975675 | 45.5    |
| ENSGALT0000 WD repeat domain 26                 | WDR26   | 0.975166 | 1692.5  |
| ENSGALT0000 WD repeat domain 27                 | WDR27   | 0.985882 | 2.5     |
| ENSGALT0000 WD repeat domain 3                  | WDR3    | 0.897707 | 2389    |
| ENSGALT0000 WD repeat domain 31                 | WDR31   | 0.976972 | 246.5   |
| ENSGALT0000 WD repeat domain 33                 | WDR33   | 0.969442 | 2536    |
| ENSGALT0000 WD repeat domain 34                 | WDR34   | 0.943316 | 676.5   |
| ENSGALT0000 WD repeat domain 35                 | WDR35   | 0.998463 | 1600.96 |
| ENSGALT0000 WD repeat domain 36                 | WDR36   | 0.911277 | 1117.5  |
| ENSGALT0000 WD repeat domain 37                 | WDR37   | 0.99191  | 533.5   |
| ENSGALT0000 WD repeat domain 4                  | WDR4    | 0.887297 | 573.5   |
| ENSGALT0000 WD repeat domain 41                 | WDR41   | 0.931504 | 201     |
| ENSGALT0000 WD repeat domain 43                 | WDR43   | 0.9759   | 2295.48 |
| ENSGALT0000 WD repeat domain 44                 | WDR44   | 0.932876 | 1539.5  |
| ENSGALT0000 WDR45-like                          | WDR45L  | 0.955882 | 1102.5  |
| ENSGALT0000 WD repeat domain 47                 | WDR47   | 0.836946 | 1260.5  |
| ENSGALT0000 WD repeat domain 48                 | WDR48   | 0.972557 | 1406.5  |
| ENSGALT0000 WD repeat domain 5                  | WDR5    | 0.935906 | 2376    |
| ENSGALT0000 WD repeat domain 51B                | WDR51B  | 0.967029 | 845     |
| ENSGALT0000 WD repeat domain 52                 | WDR52   | 0.971135 | 96      |
| ENSGALT0000 WD repeat domain 53                 | WDR53   | 0.813237 | 657.5   |
| ENSGALT0000 WD repeat domain 54                 | WDR54   | 0.957901 | 648.5   |
| ENSGALT0000 WD repeat domain 59                 | WDR59   | 0.97366  | 1515    |
| ENSGALT0000 WD repeat domain 6                  | WDR6    | 0.928243 | 537.5   |
| ENSGALT0000 WD repeat domain 60                 | WDR60   | 0.992016 | 291     |
| ENSGALT0000 WD repeat domain 61                 | WDR61   | 0.651667 | 1323.5  |
| ENSGALT0000 WD repeat domain 63                 | WDR63   | 0.997707 | 24      |
| ENSGALT0000 WD repeat domain 64                 | WDR64   | 0.60689  | 0.5     |
| ENSGALT0000 WD repeat domain 65                 | WDR65   | 0.957442 | 136     |
| ENSGALT0000 WD repeat domain 66                 | WDR66   | 0.478993 | 76      |
| ENSGALT0000 WD repeat domain 67                 | WDR67   | 0.979652 | 657     |
| ENSGALT0000 WD repeat domain 69                 | WDR69   | 0.944597 | 41      |
| ENSGALT0000 WD repeat domain 7                  | WDR7    | 0.916109 | 716.494 |
| ENSGALT0000 WD repeat domain 70                 | WDR70   | 0.85683  | 991.505 |
| ENSGALT0000 WD repeat domain 72                 | WDR72   | 0.826353 | 1.5     |
| ENSGALT0000 WD repeat domain 73                 | WDR73   | 0.939961 | 1346.18 |
| ENSGALT0000 WD repeat domain 75                 | WDR75   | 0.937194 | 1654.54 |
| ENSGALT0000 WD repeat domain 76                 | WDR76   | 0.940621 | 1735.49 |
| ENSGALT0000 WD repeat domain 77                 | WDR77   | 0.814824 | 2458.49 |
| ENSGALT0000 WD repeat domain 78                 | WDR78   | 0.927856 | 50      |
| ENSGALT0000 WD repeat domain 81                 | WDR81   | 0.967094 | 826.5   |
| ENSGALT0000 WD repeat domain 82                 | WDR82   | 0.88665  | 3094.47 |
| ENSGALT0000 WD repeat domain 83 opposite strand | WDR83OS | 0.497319 | 1246    |
| ENSGALT0000 WD repeat domain 85                 | WDR85   | 0.983827 | 1027.5  |
| ENSGALT0000 WD repeat domain 86                 | WDR86   | 0.515653 | 157.5   |
| ENSGALT0000 WD repeat domain 88                 | WDR88   | 0.9137   | 1.5     |
| ENSGALT0000 WD repeat domain 89                 | WDR89   | 0.929544 | 442.409 |
| ENSGALT0000 WD repeat domain 90                 | WDR90   | 0.977932 | 2320.5  |
| ENSGALT0000 WD repeat domain 91                 | WDR91   | 0.829595 | 2109.99 |
| ENSGALT0000 WD repeat domain 92                 | WDR92   | 0.908767 | 1019    |

|                                                  |         |           |         |
|--------------------------------------------------|---------|-----------|---------|
| ENSGALT0000 WD repeat, sterile alpha motif and   | WDSUB1  | 0.973088  | 597.943 |
| ENSGALT0000 WD and tetratricopeptide repeats 1   | WDTC1   | 0.984155  | 3163.98 |
| ENSGALT0000 WDYHV motif containing 1             | WDYHV1  | 0.934903  | 225.5   |
| ENSGALT0000 WEE1 homolog (S. pombe)              | WEE1    | 0.959446  | 1636    |
| ENSGALT0000 Wee1-like protein kinase 2           | WEE2    | 0.934507  | 10.5    |
| ENSGALT0000 WAP four-disulfide core domain 1     | WFDC1   | 0.632655  | 498     |
| ENSGALT0000 WAP four-disulfide core domain 2     | WFDC2   | 0.799368  | 541     |
| ENSGALT0000 WAP, follistatin/kazal, immunoglobu  | WFIKKN1 | 0.909062  | 36.5    |
| ENSGALT0000 WAP, follistatin/kazal, immunoglobu  | WFIKKN2 | 0.554583  | 74      |
| ENSGALT0000 Wolfram syndrome 1 (wolframin)       | WFS1    | 0.982362  | 675.178 |
| ENSGALT0000 WAS protein homology region 2 do     | WHDC1   | 0.99842   | 630.5   |
| ENSGALT0000 Wolf-Hirschhorn syndrome candida     | WHSC1   | 0.997587  | 2362    |
| ENSGALT0000 Wolf-Hirschhorn syndrome candida     | WHSC1L1 | 0.971083  | 2518.5  |
| ENSGALT0000 Wolf-Hirschhorn syndrome candida     | WHSC2   | 0.992475  | 3724.5  |
| ENSGALT0000 WNT inhibitory factor 1              | WIF1    | 0.714706  | 118     |
| ENSGALT0000 WAS/WASL interacting protein fam     | WIPF1   | 0.812223  | 239.5   |
| ENSGALT0000 WAS/WASL interacting protein fam     | WIPF2   | 0.895579  | 405.001 |
| ENSGALT0000 WAS/WASL interacting protein fam     | WIPF3   | 0.982143  | 190.5   |
| ENSGALT0000 WD repeat domain, phosphoinositic    | WIPI1   | 0.937122  | 1842.5  |
| ENSGALT0000 WD repeat domain, phosphoinositic    | WIPI2   | 0.921974  | 2309    |
| ENSGALT0000 WNT1 inducible signaling pathway     | WISP1   | 0.222949  | 120     |
| ENSGALT0000 WNT1 inducible signaling pathway     | WISP2   | 0.0503556 | 0       |
| ENSGALT0000 WNT1 inducible signaling pathway     | WISP3   | 0.980057  | 30.5    |
| ENSGALT0000 widely interspaced zinc finger motif | WIZ     | 0.98789   | 1906    |
| ENSGALT0000 wntless homolog (Drosophila)         | WLS     | 0.974838  | 19599   |
| ENSGALT0000 WNK lysine deficient protein kinase  | WNK1    | 0.970227  | 5303.85 |
| ENSGALT0000 WNK lysine deficient protein kinase  | WNK2    | 0.988899  | 6078    |
| ENSGALT0000 WNK lysine deficient protein kinase  | WNK4    | 0.944581  | 2868.5  |
| ENSGALT0000 wingless-type MMTV integration sit   | WNT10A  | 0.93408   | 5       |
| ENSGALT0000 wingless-type MMTV integration sit   | WNT11   | 0.751538  | 145     |
| ENSGALT0000 wingless-type MMTV integration sit   | WNT16   | 0.355227  | 10.5    |
| ENSGALT0000 wingless-type MMTV integration sit   | WNT2    | 0.248583  | 1.5     |
| ENSGALT0000 wingless-type MMTV integration sit   | WNT2B   | 0.109684  | 15      |
| ENSGALT0000 wingless-type MMTV integration sit   | WNT3A   | 0.383157  | 2       |
| ENSGALT0000 wingless-type MMTV integration sit   | WNT4    | 0.491954  | 2402.52 |
| ENSGALT0000 wingless-type MMTV integration sit   | WNT5A   | 0.63647   | 3274.5  |
| ENSGALT0000 wingless-type MMTV integration sit   | WNT5B   | 0.788798  | 997.993 |
| ENSGALT0000 wingless-type MMTV integration sit   | WNT6    | 0.705489  | 1976.5  |
| ENSGALT0000 wingless-type MMTV integration sit   | WNT7A   | 0.756937  | 512.5   |
| ENSGALT0000 wingless-type MMTV integration sit   | WNT7B   | 0.980757  | 578.497 |
| ENSGALT0000 wingless-type MMTV integration sit   | WNT8A   | 0.873451  | 5.5     |
| ENSGALT0000 wingless-type MMTV integration sit   | WNT8B   | 0.493676  | 38.5    |
| ENSGALT0000 wingless-type MMTV integration sit   | WNT9A   | 0.923092  | 347.501 |
| ENSGALT0000 wingless-type MMTV integration sit   | WNT9B   | 0.534404  | 1       |
| ENSGALT0000 WD repeat containing, antisense to   | WRAP73  | 0.983332  | 512.5   |
| ENSGALT0000 tryptophan rich basic protein        | WRB     | 0.930435  | 1637.51 |
| ENSGALT0000 Werner syndrome                      | WRN     | 0.966497  | 624.5   |
| ENSGALT0000 Werner helicase interacting protein  | WRNIP1  | 0.967213  | 674.498 |
| ENSGALT0000 WD repeat and SOCS box containi      | WSB1    | 0.988522  | 7317.21 |
| ENSGALT0000 WD repeat and SOCS box containi      | WSB2    | 0.92728   | 2546    |
| ENSGALT0000 WSC domain containing 1              | WSCD1   | 0.966473  | 357.5   |
| ENSGALT0000 WSC domain containing 2              | WSCD2   | 0.830497  | 1398    |
| ENSGALT0000 Wilms tumor 1                        | WT1     | 0.933629  | 21      |
| ENSGALT0000 Wilms tumor 1 associated protein     | WTAP    | 0.951745  | 1915    |
| ENSGALT0000 Wilms tumor 1 interacting protein    | WTIP    | 0.982622  | 197.5   |
| ENSGALT0000 WW and C2 domain containing 1        | WWC1    | 0.996929  | 2221.51 |

|                                                  |          |          |         |
|--------------------------------------------------|----------|----------|---------|
| ENSGALT0000 WW and C2 domain containing 2        | WWC2     | 0.991934 | 2103.5  |
| ENSGALT0000 WWC family member 3                  | WWC3     | 0.970254 | 1016.5  |
| ENSGALT0000 WW domain containing oxidoreduc      | WVOX     | 0.943218 | 790     |
| ENSGALT0000 WW domain containing E3 ubiquitin    | WWP1     | 0.962356 | 675     |
| ENSGALT0000 WW domain containing E3 ubiquitin    | WWP2     | 0.98674  | 2801.54 |
| ENSGALT0000 WW domain containing transcriptio    | WWTR1    | 0.955179 | 290.5   |
| ENSGALT0000 XPA binding protein 1, GTPase        | XAB1     | 0.813651 | 907     |
| ENSGALT0000 XIAP associated factor 1             | XAF1     | 0.526678 | 4.5     |
| ENSGALT0000 X-box binding protein 1              | XBP1     | 0.902961 | 3864.06 |
| ENSGALT0000 chemokine (C motif) receptor 1       | XCR1     | ?        | 0       |
| ENSGALT0000 xanthine dehydrogenase               | XDH      | 0.661802 | 1       |
| ENSGALT0000 Xg blood group                       | XG       | 0.464758 | 1       |
| ENSGALT0000 X-linked inhibitor of apoptosis      | XIAP     | 0.991549 | 276.5   |
| ENSGALT0000 xin actin-binding repeat containing  | XIRP1    | 0.853815 | 2       |
| ENSGALT0000 X-linked Kx blood group (McLeod s    | XK       | 0.760879 | 27      |
| ENSGALT0000 XK, Kell blood group complex subu    | XKR4     | 0.994713 | 343.5   |
| ENSGALT0000 XK, Kell blood group complex subu    | XKR6     | 0.941648 | 56.5    |
| ENSGALT0000 XK, Kell blood group complex subu    | XKR7     | 0.555667 | 129     |
| ENSGALT0000 XK, Kell blood group complex subu    | XKR8     | 0.8514   | 503     |
| ENSGALT0000 XK, Kell blood group complex subu    | XKR9     | 0.898356 | 1       |
| ENSGALT0000 XK, Kell blood group complex subu    | XKRX     | 0.901109 | 42      |
| ENSGALT0000 xeroderma pigmentosum, compler       | XPA      | 0.956814 | 170     |
| ENSGALT0000 xeroderma pigmentosum, compler       | XPC      | 0.998449 | 742.5   |
| ENSGALT0000 X-prolyl aminopeptidase (aminopep    | XPNPEP1  | 0.943644 | 3040.5  |
| ENSGALT0000 X-prolyl aminopeptidase (aminopep    | XPNPEP2  | 0.754215 | 1       |
| ENSGALT0000 X-prolyl aminopeptidase (aminopep    | XPNPEP3  | 0.892847 | 940     |
| ENSGALT0000 exportin 1 (CRM1 homolog, yeast)     | XPO1     | 0.969651 | 5395.83 |
| ENSGALT0000 exportin 4                           | XPO4     | 0.948237 | 822     |
| ENSGALT0000 exportin 5                           | XPO5     | 0.951038 | 7100.5  |
| ENSGALT0000 exportin 6                           | XPO6     | 0.942638 | 3362.5  |
| ENSGALT0000 exportin 7                           | XPO7     | 0.953925 | 4327.41 |
| ENSGALT0000 exportin, tRNA (nuclear export rece  | XPOT     | 0.98427  | 2369.5  |
| ENSGALT0000 xenotropic and polytropic retrovirus | XPR1     | 0.874411 | 4080.5  |
| ENSGALT0000 X-ray repair complementing defecti   | XRCC2    | 0.979858 | 175     |
| ENSGALT0000 X-ray repair complementing defecti   | XRCC3    | 0.947398 | 927     |
| ENSGALT0000 X-ray repair complementing defecti   | XRCC4    | 0.857018 | 100     |
| ENSGALT0000 X-ray repair complementing defecti   | XRCC5    | 0.993396 | 1594.5  |
| ENSGALT0000 X-ray repair complementing defecti   | XRCC6    | 0.789293 | 897.997 |
| ENSGALT0000 XRCC6 binding protein 1              | XRCC6BP1 | 0.905432 | 727.5   |
| ENSGALT0000 5'-3' exoribonuclease 1              | XRN1     | 0.993316 | 1417    |
| ENSGALT0000 5'-3' exoribonuclease 2              | XRN2     | 0.973804 | 4580    |
| ENSGALT0000 X-ray radiation resistance associat  | XRRA1    | 0.840206 | 5.5     |
| ENSGALT0000 xyloside xylosyltransferase 1        | XXYL1    | 0.975163 | 1692    |
| ENSGALT0000 xylulokinase homolog (H. influenza   | XYLB     | 0.979436 | 403.5   |
| ENSGALT0000 xylosyltransferase I                 | XYLT1    | 0.808951 | 878.495 |
| ENSGALT0000 xylosyltransferase II                | XYLT2    | 0.935238 | 1085.5  |
| ENSGALT0000 Y RNA                                | Y_RNA    | 0.457958 | 31.5    |
| ENSGALT0000 Yae1 domain containing 1             | YAE1D1   | 0.845347 | 277     |
| ENSGALT0000 YY1 associated factor 2              | YAF2     | 0.940027 | 552.5   |
| ENSGALT0000 Yes-associated protein 1             | YAP1     | 0.99518  | 4423.54 |
| ENSGALT0000 tyrosyl-tRNA synthetase              | YARS     | 0.855617 | 2541.12 |
| ENSGALT0000 tyrosyl-tRNA synthetase 2, mitoch    | YARS2    | 0.91526  | 588     |
| ENSGALT0000 Y box binding protein 1              | YBX1     | 0.292243 | 63145   |
| ENSGALT0000 YdjC homolog (bacterial)             | YDJC     | 0.99805  | 331     |
| ENSGALT0000 YEATS domain containing 2            | YEATS2   | 0.97622  | 2641.49 |
| ENSGALT0000 YEATS domain containing 4            | YEATS4   | 0.7195   | 830.505 |

|                                                  |        |          |         |
|--------------------------------------------------|--------|----------|---------|
| ENSGALT0000 v-yes-1 Yamaguchi sarcoma viral o    | YES1   | 0.965553 | 1508.5  |
| ENSGALT0000 Yip1 domain family, member 1         | YIPF1  | 0.894044 | 1107.5  |
| ENSGALT0000 Yip1 domain family, member 3         | YIPF3  | 0.926167 | 3096    |
| ENSGALT0000 Yip1 domain family, member 4         | YIPF4  | 0.963666 | 819.5   |
| ENSGALT0000 Yip1 domain family, member 5         | YIPF5  | 0.85779  | 1872    |
| ENSGALT0000 Yip1 domain family, member 6         | YIPF6  | 0.971922 | 702.5   |
| ENSGALT0000 Yip1 domain family, member 7         | YIPF7  | 0.649519 | 0       |
| ENSGALT0000 YKT6 v-SNARE homolog (S. cerev       | YKT6   | 0.752218 | 1015.5  |
| ENSGALT0000 YLP motif containing 1               | YLPM1  | 0.986892 | 3303.5  |
| ENSGALT0000 YME1-like 1 (S. cerevisiae)          | YME1L1 | 0.957928 | 3936.41 |
| ENSGALT0000 YOD1 OTU deubiquinating enzyme       | YOD1   | 0.962991 | 3424.5  |
| ENSGALT0000 yippee-like 1 (Drosophila)           | YPEL1  | 0.987952 | 803.5   |
| ENSGALT0000 yippee-like 2 (Drosophila)           | YPEL2  | 0.975496 | 1756.5  |
| ENSGALT0000 yippee-like 4 (Drosophila)           | YPEL4  | 0.718046 | 57.5    |
| ENSGALT0000 yippee-like 5 (Drosophila)           | YPEL5  | 0.914223 | 3148    |
| ENSGALT0000 yrdC domain containing (E. coli)     | YRDC   | 0.56536  | 1205    |
| ENSGALT0000 YSK4 Sps1/Ste20-related kinase h     | YSK4   | 0.79247  | 11.5    |
| ENSGALT0000 YTH domain containing 1              | YTHDC1 | 0.981985 | 3039.49 |
| ENSGALT0000 YTH domain containing 2              | YTHDC2 | 0.972394 | 1070.5  |
| ENSGALT0000 YTH domain family, member 1          | YTHDF1 | 0.952272 | 2731.5  |
| ENSGALT0000 YTH domain family, member 2          | YTHDF2 | 0.901948 | 1635.5  |
| ENSGALT0000 YTH domain family, member 3          | YTHDF3 | 0.971634 | 1883.91 |
| ENSGALT0000 tyrosine 3-monooxygenase/tryptopl    | YWHAB  | 0.92118  | 10310.5 |
| ENSGALT0000 tyrosine 3-monooxygenase/tryptopl    | YWHAE  | 0.800162 | 14924.1 |
| ENSGALT0000 tyrosine 3-monooxygenase/tryptopl    | YWHAG  | 0.700888 | 7603.5  |
| ENSGALT0000 tyrosine 3-monooxygenase/tryptopl    | YWHAH  | 0.521137 | 5629.69 |
| ENSGALT0000 tyrosine 3-monooxygenase/tryptopl    | YWHAQ  | 0.789139 | 21429.6 |
| ENSGALT0000 tyrosine 3-monooxygenase/tryptopl    | YWHAZ  | 0.876108 | 13233   |
| ENSGALT0000 YY1 transcription factor             | YY1    | 0.966058 | 670.995 |
| ENSGALT0000 zinc binding alcohol dehydrogenas    | ZADH2  | 0.971838 | 566     |
| ENSGALT0000 sterile alpha motif and leucine zipp | ZAK    | 0.991405 | 193.5   |
| ENSGALT0000 zeta-chain (TCR) associated protei   | ZAP70  | 0.988092 | 21      |
| ENSGALT0000 zygote arrest 1-like                 | ZAR1L  | 0.722715 | 26.5    |
| ENSGALT0000 zinc finger, BED-type containing 4   | ZBED4  | 0.992892 | 1596.5  |
| ENSGALT0000 zinc finger and BTB domain contair   | ZBTB10 | 0.995023 | 815.5   |
| ENSGALT0000 zinc finger and BTB domain contair   | ZBTB11 | 0.967745 | 676     |
| ENSGALT0000 zinc finger and BTB domain contair   | ZBTB16 | 0.963824 | 353.5   |
| ENSGALT0000 zinc finger and BTB domain contair   | ZBTB17 | 0.885403 | 1353.99 |
| ENSGALT0000 zinc finger and BTB domain contair   | ZBTB2  | 0.974794 | 1095    |
| ENSGALT0000 zinc finger and BTB domain contair   | ZBTB20 | 0.987161 | 499     |
| ENSGALT0000 zinc finger and BTB domain contair   | ZBTB24 | 0.978623 | 267.5   |
| ENSGALT0000 zinc finger and BTB domain contair   | ZBTB25 | 0.957583 | 225     |
| ENSGALT0000 zinc finger and BTB domain contair   | ZBTB26 | 0.976106 | 457.5   |
| ENSGALT0000 zinc finger and BTB domain contair   | ZBTB34 | 0.990323 | 447     |
| ENSGALT0000 zinc finger and BTB domain contair   | ZBTB37 | 0.995244 | 441.5   |
| ENSGALT0000 zinc finger and BTB domain contair   | ZBTB38 | 0.981107 | 478     |
| ENSGALT0000 zinc finger and BTB domain contair   | ZBTB40 | 0.990492 | 298.001 |
| ENSGALT0000 zinc finger and BTB domain contair   | ZBTB41 | 0.986807 | 559.5   |
| ENSGALT0000 zinc finger and BTB domain contair   | ZBTB42 | 0.970164 | 314     |
| ENSGALT0000 zinc finger and BTB domain contair   | ZBTB43 | 0.996629 | 275     |
| ENSGALT0000 zinc finger and BTB domain contair   | ZBTB44 | 0.994919 | 1127.5  |
| ENSGALT0000 zinc finger and BTB domain contair   | ZBTB45 | 0.891899 | 389.5   |
| ENSGALT0000 zinc finger and BTB domain contair   | ZBTB46 | 0.965402 | 957.5   |
| ENSGALT0000 zinc finger and BTB domain contair   | ZBTB47 | 0.943434 | 1657.5  |
| ENSGALT0000 zinc finger and BTB domain contair   | ZBTB48 | 0.91864  | 684     |
| ENSGALT0000 zinc finger and BTB domain contair   | ZBTB49 | 0.979979 | 363     |

|                                                        |          |         |
|--------------------------------------------------------|----------|---------|
| ENSGALT0000 zinc finger and BTB domain contain ZBTB5   | 0.973963 | 763     |
| ENSGALT0000 zinc finger and BTB domain contain ZBTB6   | 0.954293 | 373.5   |
| ENSGALT0000 zinc finger and BTB domain contain ZBTB7C  | 0.905365 | 30.5    |
| ENSGALT0000 zinc finger and BTB domain contain ZBTB8A  | 0.859196 | 579     |
| ENSGALT0000 zinc finger and BTB domain contain ZBTB8B  | 0.895968 | 460.5   |
| ENSGALT0000 zinc finger and BTB domain contain ZBTB8OS | 0.791434 | 565     |
| ENSGALT0000 zinc finger CCCH-type containing 1ZC3H11A  | 0.994093 | 2542    |
| ENSGALT0000 zinc finger CCCH-type containing 1ZC3H12A  | 0.988841 | 236     |
| ENSGALT0000 zinc finger CCCH-type containing 1ZC3H12B  | 0.988682 | 667.5   |
| ENSGALT0000 zinc finger CCCH-type containing 1ZC3H12C  | 0.971106 | 219.5   |
| ENSGALT0000 zinc finger CCCH-type containing 1ZC3H12D  | 0.895318 | 3       |
| ENSGALT0000 zinc finger CCCH-type containing 1ZC3H13   | 0.944803 | 5160.5  |
| ENSGALT0000 zinc finger CCCH-type containing 1ZC3H14   | 0.908817 | 1495.49 |
| ENSGALT0000 zinc finger CCCH-type containing 1ZC3H15   | 0.942566 | 1817    |
| ENSGALT0000 zinc finger CCCH-type containing 1ZC3H18   | 0.963404 | 2166.5  |
| ENSGALT0000 zinc finger CCCH-type containing 3ZC3H3    | 0.968042 | 350.5   |
| ENSGALT0000 zinc finger CCCH-type containing 6ZC3H6    | 0.973949 | 1529    |
| ENSGALT0000 zinc finger CCCH-type containing 7ZC3H7A   | 0.984598 | 2062    |
| ENSGALT0000 zinc finger CCCH-type containing 7ZC3H7B   | 0.991783 | 2139.5  |
| ENSGALT0000 zinc finger CCCH-type, antiviral 1 ZC3HAV1 | 0.971668 | 135.5   |
| ENSGALT0000 zinc finger, C3HC-type containing 1ZC3HC1  | 0.931414 | 956     |
| ENSGALT0000 zinc finger, C4H2 domain containin ZC4H2   | 0.893162 | 482     |
| ENSGALT0000 zinc finger, CCHC domain containir ZCCHC10 | 0.997813 | 132.5   |
| ENSGALT0000 zinc finger, CCHC domain containir ZCCHC11 | 0.978966 | 1019    |
| ENSGALT0000 zinc finger, CCHC domain containir ZCCHC14 | 0.949855 | 1017.51 |
| ENSGALT0000 zinc finger, CCHC domain containir ZCCHC17 | 0.776416 | 875.5   |
| ENSGALT0000 zinc finger, CCHC domain containir ZCCHC2  | 0.981194 | 1281    |
| ENSGALT0000 zinc finger, CCHC domain containir ZCCHC24 | 0.728161 | 238.5   |
| ENSGALT0000 zinc finger, CCHC domain containir ZCCHC4  | 0.974849 | 419     |
| ENSGALT0000 zinc finger, CCHC domain containir ZCCHC6  | 0.979141 | 798.495 |
| ENSGALT0000 zinc finger, CCHC domain containir ZCCHC7  | 0.920674 | 241.5   |
| ENSGALT0000 zinc finger, CCHC domain containir ZCCHC8  | 0.98201  | 666     |
| ENSGALT0000 zinc finger, CCHC domain containir ZCCHC9  | 0.8385   | 367.5   |
| ENSGALT0000 zinc finger CCHC-type and RNA bir ZCRB1    | 0.951916 | 345.5   |
| ENSGALT0000 zinc finger, DBF-type containing 2 ZDBF2   | 0.997282 | 451     |
| ENSGALT0000 zinc finger, DHHC-type containing ZDHHC1   | 0.996792 | 361.499 |
| ENSGALT0000 zinc finger, DHHC-type containing ZDHHC12  | 0.959848 | 263.5   |
| ENSGALT0000 zinc finger, DHHC-type containing ZDHHC13  | 0.97786  | 960.505 |
| ENSGALT0000 zinc finger, DHHC-type containing ZDHHC14  | 0.979423 | 422     |
| ENSGALT0000 zinc finger, DHHC-type containing ZDHHC15  | 0.895686 | 136.5   |
| ENSGALT0000 zinc finger, DHHC-type containing ZDHHC16  | 0.923598 | 888     |
| ENSGALT0000 zinc finger, DHHC-type containing ZDHHC17  | 0.712855 | 695     |
| ENSGALT0000 zinc finger, DHHC-type containing ZDHHC18  | 0.949782 | 260.001 |
| ENSGALT0000 zinc finger, DHHC-type containing ZDHHC2   | 0.853433 | 77.5    |
| ENSGALT0000 zinc finger, DHHC-type containing ZDHHC20  | 0.918698 | 1007    |
| ENSGALT0000 zinc finger, DHHC-type containing ZDHHC21  | 0.889246 | 93      |
| ENSGALT0000 zinc finger, DHHC-type containing ZDHHC22  | 0.813876 | 3.5     |
| ENSGALT0000 zinc finger, DHHC-type containing ZDHHC23  | 0.960035 | 1414    |
| ENSGALT0000 zinc finger, DHHC-type containing ZDHHC3   | 0.97537  | 1145    |
| ENSGALT0000 zinc finger, DHHC-type containing ZDHHC4   | 0.927683 | 118.5   |
| ENSGALT0000 zinc finger, DHHC-type containing ZDHHC5   | 0.938942 | 1465.53 |
| ENSGALT0000 zinc finger, DHHC-type containing ZDHHC6   | 0.971125 | 1530    |
| ENSGALT0000 zinc finger, DHHC-type containing ZDHHC7   | 0.967041 | 703.5   |
| ENSGALT0000 zinc finger, DHHC-type containing ZDHHC8   | 0.987379 | 1157    |
| ENSGALT0000 zinc finger, DHHC-type containing ZDHHC9   | 0.912919 | 5250.5  |
| ENSGALT0000 zinc finger E-box binding homeobo: ZEB1    | 0.7874   | 623.5   |



|                                                 |          |          |         |
|-------------------------------------------------|----------|----------|---------|
| ENSGALT0000 zinc finger E-box binding homeobo   | ZEB2     | 0.706524 | 968     |
| ENSGALT0000 zer-1 homolog (C. elegans)          | ZER1     | 0.970661 | 1790.5  |
| ENSGALT0000 zinc finger, AN1-type domain 1      | ZFAND1   | 0.993682 | 233.5   |
| ENSGALT0000 zinc finger, AN1-type domain 2A     | ZFAND2A  | 0.64421  | 177.5   |
| ENSGALT0000 zinc finger, AN1-type domain 3      | ZFAND3   | 0.94262  | 1437    |
| ENSGALT0000 zinc finger, AN1-type domain 4      | ZFAND4   | 0.935055 | 587     |
| ENSGALT0000 zinc finger, AN1-type domain 5      | ZFAND5   | 0.911258 | 1350.5  |
| ENSGALT0000 zinc finger, AN1-type domain 6      | ZFAND6   | 0.883231 | 1294    |
| ENSGALT0000 zinc finger and AT hook domain cor  | ZFAT     | 0.967423 | 274     |
| ENSGALT0000 zinc finger, C3H1-type containing   | ZFC3H1   | 0.990619 | 2094    |
| ENSGALT0000 zinc finger homeobox 3              | ZFHX3    | 0.99205  | 4823.98 |
| ENSGALT0000 zinc finger protein 106 homolog (m  | ZFP106   | 0.971478 | 1034    |
| ENSGALT0000 zinc finger protein 161 homolog (m  | ZFP161   | 0.966525 | 288     |
| ENSGALT0000 zinc finger protein 64 homolog (mo  | ZFP64    | 0.945085 | 1737.01 |
| ENSGALT0000 zinc finger protein 91 homolog (mo  | ZFP91    | 0.962113 | 4535.18 |
| ENSGALT0000 zinc finger protein 92 homolog (mo  | ZFP92    | 0.963871 | 666.998 |
| ENSGALT0000 zinc finger protein, multitype 1    | ZFPM1    | 0.886991 | 5137.5  |
| ENSGALT0000 zinc finger protein, multitype 2    | ZFPM2    | 0.661028 | 143.5   |
| ENSGALT0000 zinc finger RNA binding protein     | ZFR      | 0.922965 | 2321.5  |
| ENSGALT0000 zinc finger protein, X-linked       | ZFX      | 0.98125  | 953.005 |
| ENSGALT0000 zinc finger, FYVE domain containin  | ZFYVE1   | 0.93272  | 1380.5  |
| ENSGALT0000 zinc finger, FYVE domain containin  | ZFYVE19  | 0.926037 | 1433.5  |
| ENSGALT0000 zinc finger, FYVE domain containin  | ZFYVE20  | 0.946556 | 1016.08 |
| ENSGALT0000 zinc finger, FYVE domain containin  | ZFYVE21  | 0.862504 | 746     |
| ENSGALT0000 zinc finger, FYVE domain containin  | ZFYVE26  | 0.942262 | 78.5    |
| ENSGALT0000 zinc finger, FYVE domain containin  | ZFYVE27  | 0.923403 | 960     |
| ENSGALT0000 zinc finger, FYVE domain containin  | ZFYVE28  | 0.974804 | 210.5   |
| ENSGALT0000 zinc finger, FYVE domain containin  | ZFYVE9   | 0.991664 | 1400    |
| ENSGALT0000 zinc finger, CCCH-type with G patc  | ZGPAT    | 0.940582 | 509.5   |
| ENSGALT0000 zinc fingers and homeoboxes 1       | ZHX1     | 0.992063 | 459.5   |
| ENSGALT0000 Zic family member 1                 | ZIC1     | 0.332219 | 126.369 |
| ENSGALT0000 Zic family member 3 heterotaxy 1 (  | ZIC3     | 0.596438 | 24.5    |
| ENSGALT0000 Zic family member 5                 | ZIC5     | 0.474702 | 31.6307 |
| ENSGALT0000 zinc finger, matrin-type 2          | ZMAT2    | 0.899891 | 2436.5  |
| ENSGALT0000 zinc finger, matrin-type 3          | ZMAT3    | 0.942332 | 448     |
| ENSGALT0000 zinc finger, matrin-type 4          | ZMAT4    | 0.92632  | 62.5    |
| ENSGALT0000 zinc finger, matrin type 5          | ZMAT5    | 0.723037 | 1007    |
| ENSGALT0000 zinc finger, MIZ-type containing 1  | ZMIZ1    | 0.986483 | 4154    |
| ENSGALT0000 zinc metallopeptidase (STE24 hom    | ZMPSTE24 | 0.932178 | 950.5   |
| ENSGALT0000 zinc finger, MYM-type 3             | ZMYM3    | 0.977111 | 1652    |
| ENSGALT0000 zinc finger, MYM-type 4             | ZMYM4    | 0.967777 | 2495.02 |
| ENSGALT0000 ZMYM6 neighbor                      | ZMYM6NB  | 0.364604 | 252.5   |
| ENSGALT0000 zinc finger, MYND-type containing   | ZMYND10  | 0.932522 | 173     |
| ENSGALT0000 zinc finger, MYND-type containing   | ZMYND11  | 0.993771 | 2390.5  |
| ENSGALT0000 zinc finger, MYND-type containing   | ZMYND12  | 0.988479 | 118.5   |
| ENSGALT0000 zinc finger, MYND-type containing   | ZMYND17  | 0.911673 | 41.5    |
| ENSGALT0000 zinc finger, MYND-type containing   | ZMYND19  | 0.829071 | 202.501 |
| ENSGALT0000 zinc finger, MYND-type containing   | ZMYND8   | 0.982362 | 3148    |
| ENSGALT0000 zinc finger protein 131             | ZNF131   | 0.919841 | 132.5   |
| ENSGALT0000 zinc finger protein 142             | ZNF142   | 0.964221 | 1424.5  |
| ENSGALT0000 zinc finger protein 143             | ZNF143   | 0.988613 | 1046.5  |
| ENSGALT0000 zinc finger protein 148             | ZNF148   | 0.97525  | 383.5   |
| ENSGALT0000 zinc finger protein 185 (LIM domair | ZNF185   | 0.872997 | 530.5   |
| ENSGALT0000 zinc finger protein 207             | ZNF207   | 0.871228 | 8290.5  |
| ENSGALT0000 zinc finger protein 217             | ZNF217   | 0.987032 | 3683.5  |
| ENSGALT0000 zinc finger protein 236             | ZNF236   | 0.971059 | 700     |

|                                      |         |          |         |
|--------------------------------------|---------|----------|---------|
| ENSGALT0000 zinc finger protein 238  | ZNF238  | 0.827075 | 717.5   |
| ENSGALT0000 zinc finger protein 250  | ZNF250  | 0.934539 | 186.463 |
| ENSGALT0000 zinc finger protein 259  | ZNF259  | 0.897435 | 1333.98 |
| ENSGALT0000 zinc finger protein 276  | ZNF276  | 0.978719 | 849     |
| ENSGALT0000 zinc finger protein 277  | ZNF277  | 0.878474 | 246     |
| ENSGALT0000 zinc finger protein 281  | ZNF281  | 0.917404 | 538     |
| ENSGALT0000 zinc finger protein 292  | ZNF292  | 0.999748 | 1661    |
| ENSGALT0000 zinc finger protein 295  | ZNF295  | 0.96885  | 477     |
| ENSGALT0000 zinc finger protein 318  | ZNF318  | 0.96914  | 899.5   |
| ENSGALT0000 zinc finger protein 319  | ZNF319  | 0.974873 | 1076.09 |
| ENSGALT0000 zinc finger protein 326  | ZNF326  | 0.938826 | 2887.5  |
| ENSGALT0000 zinc finger protein 330  | ZNF330  | 0.93731  | 984.5   |
| ENSGALT0000 zinc finger protein 335  | ZNF335  | 0.933755 | 3594.48 |
| ENSGALT0000 zinc finger protein 341  | ZNF341  | 0.976686 | 793.5   |
| ENSGALT0000 zinc finger protein 346  | ZNF346  | 0.965347 | 486     |
| ENSGALT0000 zinc finger protein 365  | ZNF365  | 0.908102 | 200     |
| ENSGALT0000 zinc finger protein 366  | ZNF366  | 0.80536  | 15.5    |
| ENSGALT0000 zinc finger protein 367  | ZNF367  | 0.873152 | 127.5   |
| ENSGALT0000 zinc finger protein 384  | ZNF384  | 0.986446 | 2492    |
| ENSGALT0000 zinc finger protein 385B | ZNF385B | 0.87291  | 249.5   |
| ENSGALT0000 zinc finger protein 385C | ZNF385C | 0.932076 | 1045.5  |
| ENSGALT0000 zinc finger protein 385D | ZNF385D | 0.751979 | 74.5    |
| ENSGALT0000 zinc finger protein 395  | ZNF395  | 0.982309 | 605.5   |
| ENSGALT0000 zinc finger protein 407  | ZNF407  | 0.964608 | 344.5   |
| ENSGALT0000 zinc finger protein 410  | ZNF410  | 0.987937 | 1154.5  |
| ENSGALT0000 zinc finger protein 414  | ZNF414  | 0.797837 | 413     |
| ENSGALT0000 zinc finger protein 423  | ZNF423  | 0.98562  | 6356    |
| ENSGALT0000 zinc finger protein 438  | ZNF438  | 0.998104 | 332.5   |
| ENSGALT0000 zinc finger protein 451  | ZNF451  | 0.979293 | 897     |
| ENSGALT0000 zinc finger protein 462  | ZNF462  | 0.99782  | 11088   |
| ENSGALT0000 zinc finger protein 469  | ZNF469  | 0.99347  | 265.5   |
| ENSGALT0000 zinc finger protein 474  | ZNF474  | ?        | 0       |
| ENSGALT0000 zinc finger protein 488  | ZNF488  | 0.499978 | 38.5    |
| ENSGALT0000 zinc finger protein 503  | ZNF503  | 0.672711 | 305.631 |
| ENSGALT0000 zinc finger protein 507  | ZNF507  | 0.993127 | 365.5   |
| ENSGALT0000 zinc finger protein 511  | ZNF511  | 0.9134   | 235     |
| ENSGALT0000 zinc finger protein 512  | ZNF512  | 0.955473 | 1135.5  |
| ENSGALT0000 zinc finger protein 512B | ZNF512B | 0.980171 | 3000.48 |
| ENSGALT0000 zinc finger protein 516  | ZNF516  | 0.974765 | 2973.5  |
| ENSGALT0000 zinc finger protein 518B | ZNF518B | 0.98123  | 1178.99 |
| ENSGALT0000 zinc finger protein 521  | ZNF521  | 0.910352 | 2581.5  |
| ENSGALT0000 zinc finger protein 536  | ZNF536  | 0.889824 | 2309.5  |
| ENSGALT0000 zinc finger protein 541  | ZNF541  | 0.922734 | 313     |
| ENSGALT0000 zinc finger protein 592  | ZNF592  | 0.958997 | 712.5   |
| ENSGALT0000 zinc finger protein 593  | ZNF593  | 0.664811 | 7407    |
| ENSGALT0000 zinc finger protein 598  | ZNF598  | 0.960163 | 1670.5  |
| ENSGALT0000 zinc finger protein 608  | ZNF608  | 0.963215 | 1149.5  |
| ENSGALT0000 zinc finger protein 609  | ZNF609  | 0.933166 | 6535    |
| ENSGALT0000 zinc finger protein 618  | ZNF618  | 0.981685 | 1187    |
| ENSGALT0000 zinc finger protein 622  | ZNF622  | 0.856024 | 1164.71 |
| ENSGALT0000 Nuclear protein NP220    | ZNF638  | 0.933023 | 1043.5  |
| ENSGALT0000 zinc finger protein 644  | ZNF644  | 0.98965  | 1811.5  |
| ENSGALT0000 zinc finger protein 650  | ZNF650  | 0.978927 | 894     |
| ENSGALT0000 zinc finger protein 652  | ZNF652  | 0.9938   | 1272.51 |
| ENSGALT0000 zinc finger protein 687  | ZNF687  | 0.971154 | 147     |
| ENSGALT0000 zinc finger protein 692  | ZNF692  | 0.960674 | 1163    |

|                                                 |         |          |         |
|-------------------------------------------------|---------|----------|---------|
| ENSGALT0000 zinc finger protein 704             | ZNF704  | 0.935324 | 463.5   |
| ENSGALT0000 Zinc finger protein 706             | ZNF706  | 0.957853 | 3868.99 |
| ENSGALT0000 zinc finger protein 711             | ZNF711  | 0.974175 | 1491.49 |
| ENSGALT0000 zinc finger protein 750             | ZNF750  | 0.589588 | 2       |
| ENSGALT0000 zinc finger protein 76              | ZNF76   | 0.925398 | 680     |
| ENSGALT0000 zinc finger family member 767       | ZNF767  | 0.921313 | 1418.87 |
| ENSGALT0000 zinc finger protein 770             | ZNF770  | 0.978853 | 226.5   |
| ENSGALT0000 zinc finger protein 800             | ZNF800  | 0.952117 | 122     |
| ENSGALT0000 zinc finger protein 804A            | ZNF804A | 0.806917 | 437     |
| ENSGALT0000 zinc finger protein 804B            | ZNF804B | 0.729893 | 43      |
| ENSGALT0000 zinc finger protein 821             | ZNF821  | 0.982568 | 2753.74 |
| ENSGALT0000 zinc finger protein 827             | ZNF827  | 0.966639 | 888.508 |
| ENSGALT0000 zinc finger protein 830             | ZNF830  | 0.826925 | 529     |
| ENSGALT0000 zinc finger protein 839             | ZNF839  | 0.992089 | 301.5   |
| ENSGALT0000 zinc finger, NFX1-type containing 1 | ZNFX1   | 0.990048 | 815.5   |
| ENSGALT0000 zinc finger, HIT-type containing 3  | ZNHIT3  | 0.241765 | 767.5   |
| ENSGALT0000 zinc finger, HIT-type containing 6  | ZNHIT6  | 0.961927 | 299.5   |
| ENSGALT0000 zinc and ring finger 1              | ZNRF1   | 0.924593 | 1036.24 |
| ENSGALT0000 zinc and ring finger 3              | ZNRF3   | 0.998847 | 792.004 |
| ENSGALT0000 zinc and ring finger 4              | ZNRF4   | ?        | 0       |
| ENSGALT0000 zona pellucida glycoprotein 1 (sper | ZP1     | 0.840839 | 55      |
| ENSGALT0000 zona pellucida glycoprotein 2 (sper | ZP2     | 0.753678 | 5.5     |
| ENSGALT0000 zona pellucida glycoprotein 3 (sper | ZP3     | 0.826415 | 45      |
| ENSGALT0000 zona pellucida glycoprotein 4       | ZP4     | 0.64056  | 2.5     |
| ENSGALT0000 zona pellucida protein              | ZPAX    | 0.731507 | 2       |
| ENSGALT0000 zona pellucida binding protein      | ZPBP    | 0.611019 | 29      |
| ENSGALT0000 zona pellucida binding protein 2    | ZPBP2   | 0.923023 | 5.5     |
| ENSGALT0000 zona pellucida protein D            | ZPD     | 0.19245  | 0.5     |
| ENSGALT0000 zona pellucida-like domain containi | ZPLD1   | 0.270313 | 37.5    |
| ENSGALT0000 zinc finger, RAN-binding domain cc  | ZRANB1  | 0.985692 | 1419    |
| ENSGALT0000 zinc finger, RAN-binding domain cc  | ZRANB2  | 0.971913 | 1949    |
| ENSGALT0000 zinc finger, RAN-binding domain cc  | ZRANB3  | 0.972053 | 271.501 |
| ENSGALT0000 zinc finger (CCCH type), RNA-bind   | ZRSR2   | 0.857158 | 606     |
| ENSGALT0000 zinc finger, SWIM-type containing 1 | ZSWIM1  | 0.983389 | 306     |
| ENSGALT0000 zinc finger, SWIM-type containing 3 | ZSWIM3  | 0.966612 | 249.001 |
| ENSGALT0000 zinc finger, SWIM-type containing 5 | ZSWIM5  | 0.923994 | 2726    |
| ENSGALT0000 zinc finger, SWIM-type containing 7 | ZSWIM7  | 0.937802 | 669.167 |
| ENSGALT0000 zinc finger with UFM1-specific pept | ZUFSP   | 0.975365 | 260.5   |
| ENSGALT0000 ZW10, kinetochore associated, hor   | ZW10    | 0.91931  | 1563.5  |
| ENSGALT0000 Zwilch, kinetochore associated, hor | ZWILCH  | 0.929069 | 810.5   |
| ENSGALT0000 ZXD family zinc finger C            | ZXDC    | 0.963257 | 990.5   |
| ENSGALT0000 zyg-11 homolog B (C. elegans)       | ZYG11B  | 0.923796 | 659     |
| ENSGALT0000 zyxin                               | ZYX     | 0.932488 | 3372.5  |
| ENSGALT0000 zinc finger, ZZ-type with EF-hand d | ZZEF1   | 0.96509  | 1461.5  |
| ENSGALT0000 zinc finger, ZZ-type containing 3   | ZZZ3    | 0.975264 | 1159.49 |

| Mid     | Prox    | p-value(Distal vs. M | Log2(Distal vs. Mid) | p-value(Distal vs. Prox) |
|---------|---------|----------------------|----------------------|--------------------------|
| 1944.25 | 1313.46 | 0.279429             | -0.933107756         | 0.702864                 |
| 3695.44 | 271.5   | 0.38816              | -2.076741728         | 0.842924                 |
| 879.501 | 233     | 0.374549             | -1.583324715         | 0.921226                 |
| 164.5   | 400.5   | 0.981827             | 0.055908741          | 0.446927                 |
| 1457    | 1508    | 0.871711             | -0.306661338         | 0.84867                  |
| 0       | 0       | ?                    | #DIV/0!              | ?                        |
| 152.5   | 155.5   | 0.73147              | -0.298469122         | 0.705154                 |
| 492.031 | 763.925 | 0.963183             | 0.089440323          | 0.727339                 |
| 498     | 500     | 0.920312             | -0.211809082         | 0.917981                 |
| 18      | 42.5    | 0.990088             | -0.040641984         | 0.548486                 |
| 1       | 3       | 0.679547             | 1.321928095          | 0.888898                 |
| 71.5    | 69.5    | 0.981961             | 0.039801008          | 0.963936                 |
| 544     | 582.5   | 0.827412             | -0.443606651         | 0.782883                 |
| 497     | 451.5   | 0.095833             | -0.997100109         | 0.144842                 |
| 4704.5  | 4785.5  | 0.666589             | -0.552142416         | 0.650336                 |
| 1815.51 | 1948.52 | 0.560172             | -1.030121175         | 0.509241                 |
| 37      | 56.5    | 0.970449             | 0.075948853          | 0.748201                 |
| 26      | 30.5    | 0.962983             | -0.085729874         | 0.853171                 |
| 64.7491 | 78.322  | 0.670635             | -0.743488691         | 0.526702                 |
| 431     | 401     | 0.748393             | -0.46383168          | 0.809875                 |
| 2675    | 3039    | 0.821733             | -0.408401108         | 0.72833                  |
| 1701    | 1826    | 0.851161             | -0.390648602         | 0.806316                 |
| 3499.57 | 3057.95 | 0.506055             | -0.718846075         | 0.644595                 |
| 76.5    | 47.5    | 0.723759             | 0.379236778          | 0.444709                 |
| 12089.5 | 12304   | 0.63063              | -0.721771068         | 0.615999                 |
| 1843    | 1825    | 0.720641             | -0.521410869         | 0.72908                  |
| 2361.5  | 2048    | 0.529892             | -0.576586668         | 0.700903                 |
| 528.5   | 567     | 0.96895              | 0.0705843            | 0.985935                 |
| 229.5   | 208.5   | 0.685731             | -0.502500341         | 0.778684                 |
| 1063    | 1006.5  | 0.864548             | -0.293205934         | 0.903332                 |
| 1282.51 | 1266.49 | 0.742198             | -0.478486717         | 0.753022                 |
| 553     | 520.5   | 0.72437              | -0.693283155         | 0.764708                 |
| 783     | 756.5   | 0.73762              | -0.582201361         | 0.763051                 |
| 704     | 1040.99 | 0.986686             | -0.040512241         | 0.762249                 |
| 42      | 439     | 0.95614              | 0.573466862          | 0.352931                 |
| 10977.5 | 10305   | 0.724293             | -0.697961241         | 0.766153                 |
| 249.5   | 323.5   | 0.996828             | 0.008647549          | 0.848169                 |
| 2396    | 2577.5  | 0.845184             | -0.411028897         | 0.799273                 |
| 539.5   | 381.5   | 0.802241             | -0.390730529         | 0.952926                 |
| 73.8935 | 165.5   | 0.82266              | -0.885447464         | 0.432142                 |
| 78      | 96.5    | 0.643997             | -0.945552216         | 0.500203                 |
| 624.5   | 630     | 0.93489              | -0.131739653         | 0.928346                 |
| 489.498 | 499.5   | 0.73969              | -0.500530927         | 0.72267                  |
| 709.5   | 806     | 0.909145             | -0.215630304         | 0.821895                 |
| 317     | 341     | 0.630264             | -1.009131012         | 0.582311                 |
| 1788.5  | 1810    | 0.974514             | -0.059700565         | 0.966962                 |
| 65.5    | 55      | 0.807959             | -0.404066381         | 0.933083                 |
| 722     | 808     | 0.893454             | -0.27064759          | 0.820828                 |
| 120.5   | 146     | 0.982082             | -0.048703192         | 0.868776                 |
| 2879.5  | 3139.5  | 0.940354             | -0.154265035         | 0.887668                 |
| 257.5   | 261.5   | 0.94263              | 0.133673328          | 0.951791                 |
| 1839    | 1410.5  | 0.968348             | -0.067039484         | 0.870079                 |
| 631.506 | 668.996 | 0.81483              | -0.48247686          | 0.777607                 |
| 2847.5  | 2161    | 0.823368             | -0.348775654         | 0.978057                 |
| 792     | 767.5   | 0.809981             | -0.379058202         | 0.834804                 |

|         |         |          |              |          |
|---------|---------|----------|--------------|----------|
| 4270.46 | 4727.56 | 0.863424 | -0.298828153 | 0.787678 |
| 4008.43 | 4219.41 | 0.757578 | -0.507342118 | 0.717195 |
| 5193.5  | 5036    | 0.613393 | -0.647915874 | 0.642184 |
| 146     | 193.5   | 0.923963 | 0.193879734  | 0.904183 |
| 321.5   | 324     | 0.579612 | -0.984379019 | 0.574004 |
| 875     | 706     | 0.544295 | -1.340597306 | 0.674129 |
| 18      | 26      | 0.824098 | 0.38466385   | 0.919223 |
| 1       | 0       | 1        | 0            | 0.450185 |
| 285.5   | 296.5   | 0.752594 | -0.446540502 | 0.718991 |
| 290.5   | 241.5   | 0.556683 | -0.612538745 | 0.757667 |
| 3901    | 4099.5  | 0.849312 | -0.343023022 | 0.814014 |
| 2036    | 2548    | 0.399068 | -0.711331054 | 0.204879 |
| 759.5   | 770     | 0.931607 | -0.134277927 | 0.921019 |
| 484     | 641.5   | 0.935911 | -0.167319178 | 0.751608 |
| 211.5   | 665.5   | 0.949292 | 0.197327084  | 0.415576 |
| 275.5   | 286     | 0.925175 | -0.166329294 | 0.899178 |
| 545.5   | 517.5   | 0.69368  | -0.540688601 | 0.740922 |
| 3033.5  | 2724.49 | 0.755965 | -0.463171608 | 0.844151 |
| 1896.5  | 2141    | 0.825923 | -0.451371584 | 0.746145 |
| 45.5    | 45.5    | 0.978845 | 0.046794211  | 0.978845 |
| 254.5   | 36.5    | 0.448131 | 1.145469266  | 0.234103 |
| 11727.5 | 11756.6 | 0.850385 | -0.361294067 | 0.848739 |
| 1447    | 1351    | 0.827515 | -0.449681334 | 0.86955  |
| 1794.5  | 1494.5  | 0.612312 | -1.16011003  | 0.72046  |
| 536.5   | 471.5   | 0.894194 | -0.20170109  | 0.992408 |
| 294     | 247     | 0.368865 | -1.77340759  | 0.473952 |
| 1864.51 | 1705.47 | 0.672918 | -0.786416666 | 0.734974 |
| 1       | 1       | 0.710482 | -1           | 0.710482 |
| 2103.5  | 2022    | 0.859545 | -0.312357943 | 0.887169 |
| 10      | 9       | 0.920936 | 0.137503524  | 0.843079 |
| 1456    | 1422.5  | 0.625296 | -0.723159795 | 0.644792 |
| 3052.5  | 2820.5  | 0.690467 | -0.433349378 | 0.776652 |
| 6258.65 | 6499.02 | 0.826644 | -0.435771282 | 0.801882 |
| 938     | 1104    | 0.849496 | -0.323659445 | 0.723454 |
| 1714.5  | 1681.5  | 0.54206  | -0.773466298 | 0.559753 |
| 3426.02 | 3714.51 | 0.733895 | -0.438822481 | 0.655934 |
| 5922.11 | 4690.43 | 0.605051 | -0.55656704  | 0.853057 |
| 2391    | 2413.5  | 0.836483 | -0.32290893  | 0.828991 |
| 1162.43 | 1309.62 | 0.962115 | -0.079469828 | 0.87338  |
| 256     | 271.5   | 0.559658 | 1.124118726  | 0.578803 |
| 1974.99 | 2084.53 | 0.874028 | -0.260691461 | 0.832618 |
| 7633    | 6154    | 0.454373 | -2.046285435 | 0.568827 |
| 4778.5  | 4451.5  | 0.527398 | -0.859576359 | 0.588371 |
| 4304.11 | 4128.91 | 0.352372 | -1.048313201 | 0.386232 |
| 2187.5  | 2451    | 0.793378 | -0.373968113 | 0.691578 |
| 1048    | 904.999 | 0.721861 | -0.483634484 | 0.851603 |
| 1944.4  | 2086.56 | 0.364364 | -0.809454382 | 0.300495 |
| 273     | 277.5   | 0.626986 | -0.748461233 | 0.613662 |
| 647.5   | 491     | 0.403891 | -1.627929949 | 0.577453 |
| 3653.99 | 3079.97 | 0.489403 | -1.592654464 | 0.590203 |
| 1       | 2       | 0.559404 | 1.584962501  | 0.764931 |
| 485     | 478.5   | 0.859521 | -0.303455435 | 0.869301 |
| 898.167 | 963.167 | 0.845649 | -0.333717132 | 0.793226 |
| 313.7   | 293.5   | 0.962874 | -0.07420876  | 0.989438 |
| 4       | 11.5    | 0.804606 | 0.584962501  | 0.511508 |
| 5.5     | 7       | 0.702697 | 0.628031223  | 0.847091 |

|         |         |          |              |          |
|---------|---------|----------|--------------|----------|
| 190     | 147     | 0.485233 | -1.11042399  | 0.677294 |
| 415.5   | 460.5   | 0.962133 | -0.085836169 | 0.891597 |
| 15131.7 | 16202.2 | 0.719997 | -0.594029407 | 0.666308 |
| 41.5    | 18.5    | 0.238589 | -2.28757659  | 0.68671  |
| 419.5   | 359     | 0.434452 | -0.651831069 | 0.624906 |
| 2068.5  | 2203.02 | 0.764244 | -0.479084144 | 0.713358 |
| 13137.5 | 12876.5 | 0.640071 | -0.702513967 | 0.656749 |
| 483.5   | 558     | 0.338741 | -1.216932361 | 0.244893 |
| 73      | 58      | 0.695197 | 0.591535155  | 0.586993 |
| 513     | 476     | 0.17929  | -0.805598322 | 0.242674 |
| 4283.5  | 4028.5  | 0.369117 | -1.170893635 | 0.415919 |
| 1086    | 1163.5  | 0.464901 | -0.701104095 | 0.395144 |
| 1011.51 | 875.002 | 0.740189 | -0.554984119 | 0.847116 |
| 1993    | 2122    | 0.911141 | -0.191301353 | 0.8654   |
| 432     | 396     | 0.997117 | -0.005018075 | 0.93382  |
| 260.5   | 247     | 0.744105 | -0.466718849 | 0.790143 |
| 1316    | 1045.5  | 0.535551 | -0.565092978 | 0.815054 |
| 1070    | 1133    | 0.966801 | -0.063395081 | 0.921498 |
| 863.5   | 851     | 0.725441 | -0.382275723 | 0.741539 |
| 866.5   | 1154    | 0.839067 | -0.432626452 | 0.648508 |
| 6       | 4.5     | 0.92941  | 0.115477217  | 0.725977 |
| 0.5     | 0       | 0.308068 | #NUM!        | 1        |
| 340.5   | 421.5   | 0.77292  | -0.559761947 | 0.621089 |
| 82      | 118.5   | 0.854007 | 0.41063232   | 0.948232 |
| 1825.5  | 1737    | 0.455694 | -1.480929128 | 0.487298 |
| 974     | 828.995 | 0.906998 | 0.162996093  | 0.794185 |
| 450     | 390     | 0.789882 | -0.391716425 | 0.906318 |
| 2255    | 2250.5  | 0.906875 | -0.186170471 | 0.908399 |
| 2118    | 2383    | 0.685539 | -0.896836044 | 0.610309 |
| 3576.5  | 2583    | 0.945762 | -0.098052567 | 0.826904 |
| 10      | 16      | 0.873267 | -0.415037499 | 0.596636 |
| 408.999 | 595.003 | 0.778353 | -0.684431659 | 0.546155 |
| 0       | 0       | 0.308068 | #DIV/0!      | 0.308068 |
| 4       | 7.5     | 0.667337 | 0.906890596  | 1        |
| 18.5    | 22.5    | 0.859118 | -0.351472371 | 0.724931 |
| 452.5   | 459.5   | 0.964841 | 0.074558422  | 0.97509  |
| 2200    | 2008.5  | 0.605233 | -0.820778502 | 0.676738 |
| 240.5   | 249.501 | 0.793897 | -0.382416078 | 0.762219 |
| 6998.96 | 7508.51 | 0.589914 | -0.712455199 | 0.526827 |
| 381.521 | 848.006 | 0.553741 | -1.20917404  | 0.126922 |
| 2.5     | 1.5     | 0.669515 | -0.736965594 | 1        |
| 80.3103 | 138.897 | 0.747888 | -0.390196983 | 0.246276 |
| 57134.7 | 54670.5 | 0.434253 | -0.946461624 | 0.472441 |
| 10520.5 | 11929.3 | 0.330338 | -0.864618592 | 0.229803 |
| 0       | 0       | ?        | #DIV/0!      | ?        |
| 3264.98 | 3681.61 | 0.866951 | -0.293783373 | 0.77781  |
| 55.5    | 70.0001 | 0.910787 | 0.227951947  | 0.952934 |
| 4475    | 4791.5  | 0.764706 | -0.445335697 | 0.706093 |
| 4138.54 | 3731.53 | 0.61046  | -0.64966093  | 0.707291 |
| 10609.5 | 9323.5  | 0.618674 | -0.760085396 | 0.722926 |
| 5176.98 | 5180.98 | 0.751535 | -0.489862901 | 0.750902 |
| 6242.5  | 5791.5  | 0.581699 | -0.701393356 | 0.651384 |
| 942.5   | 823.5   | 0.675059 | -0.612391724 | 0.788053 |
| 563     | 574     | 0.808958 | -0.363851905 | 0.792784 |
| 2926.98 | 3383.98 | 0.541505 | -0.616588228 | 0.392989 |
| 1932    | 1932.5  | 0.635744 | -0.604698719 | 0.635499 |

|         |         |           |              |          |
|---------|---------|-----------|--------------|----------|
| 1.5     | 0       | 0.308068  | #NUM!        | 1        |
| 1629.5  | 1880.5  | 0.839063  | -0.351670827 | 0.729998 |
| 3377.55 | 2924.02 | 0.723652  | -0.580957198 | 0.832132 |
| 18.5    | 15      | 0.965377  | 0.075948853  | 0.845655 |
| 3338.02 | 3294.07 | 0.777179  | -0.56553252  | 0.785874 |
| 1437.48 | 1406.5  | 0.899373  | -0.246783204 | 0.913073 |
| 877.001 | 664.497 | 0.0697192 | -0.948298193 | 0.26269  |
| 162.5   | 193.5   | 0.942155  | -0.120294234 | 0.80698  |
| 8       | 7.5     | 0.54184   | -1.192645078 | 0.584965 |
| 508.59  | 519.484 | 0.878999  | -0.238828616 | 0.862261 |
| 5245.95 | 5188.78 | 0.946323  | -0.117330149 | 0.953797 |
| 138     | 115.5   | 0.678011  | -0.841737916 | 0.791302 |
| 409     | 628.5   | 0.688701  | -1.007072049 | 0.428479 |
| 26      | 16.5    | 0.812187  | -0.452512205 | 0.932056 |
| 4394.9  | 4469.36 | 0.920729  | -0.16236233  | 0.908193 |
| 843.5   | 1218    | 0.502025  | -2.505925137 | 0.326144 |
| 535.5   | 452.499 | 0.698936  | -0.797956224 | 0.80434  |
| 1185    | 1065    | 0.865123  | 0.308964909  | 0.809396 |
| 16      | 45      | 0.950012  | 0.209453366  | 0.522723 |
| 358.5   | 396.5   | 0.803416  | -0.444170157 | 0.728916 |
| 10      | 15.5    | 0.965441  | -0.074000581 | 0.611907 |
| 2644.02 | 2769.59 | 0.917875  | -0.174339191 | 0.883934 |
| 5989.34 | 3395.01 | 0.55179   | 1.017729967  | 0.411882 |
| 639     | 1026.5  | 0.690571  | -1.076498137 | 0.414561 |
| 833     | 947.5   | 0.853945  | 0.343586976  | 0.92812  |
| 1104    | 1029.5  | 0.868922  | -0.284361247 | 0.918011 |
| 723     | 912     | 0.674216  | -1.012022528 | 0.531802 |
| 4351    | 3023.5  | 0.866994  | 0.267531322  | 0.679886 |
| 3608    | 2448    | 0.986138  | 0.027329838  | 0.759073 |
| 180     | 238     | 0.970318  | 0.066567617  | 0.829177 |
| 195     | 234     | 0.666272  | -1.206450877 | 0.56504  |
| 4746    | 3237.5  | 0.957498  | 0.091854936  | 0.757898 |
| 2383.5  | 2714    | 0.899777  | -0.269039199 | 0.819796 |
| 1160.5  | 1013.5  | 0.873448  | 0.282993566  | 0.801451 |
| 135.5   | 172     | 0.909928  | 0.244280446  | 0.958458 |
| 3348.31 | 3486.67 | 0.645223  | -1.038676206 | 0.619996 |
| 305     | 286.5   | 0.862627  | -0.2926635   | 0.907612 |
| 2261    | 3706    | 0.800492  | -0.658929499 | 0.50408  |
| 490.5   | 386     | 0.883311  | -0.274551222 | 0.973087 |
| 203     | 205     | 0.377704  | 2.067679405  | 0.378982 |
| 107.5   | 39      | 0.479201  | 0.89566334   | 0.255226 |
| 1671    | 1447    | 0.645117  | -0.858655662 | 0.74427  |
| 34.5    | 24.5    | 0.38176   | -1.064130337 | 0.680345 |
| 3490.52 | 3282.63 | 0.806228  | -0.399628916 | 0.852941 |
| 935     | 934.992 | 0.803652  | -0.474362004 | 0.803658 |
| 116.5   | 72.5    | 0.952618  | -0.102634912 | 0.790485 |
| 741     | 697     | 0.951966  | -0.101832128 | 0.993812 |
| 664     | 541.5   | 0.0783655 | -1.050858885 | 0.189282 |
| 550     | 485     | 0.567656  | -0.647960588 | 0.695557 |
| 310.5   | 286     | 0.790325  | -0.392753085 | 0.858316 |
| 949.5   | 949.5   | 0.859709  | -0.30512274  | 0.859709 |
| 3098    | 2914    | 0.898457  | 0.197700545  | 0.857979 |
| 28      | 37.5    | 0.655715  | -1.415037499 | 0.502037 |
| 68.5    | 189     | 0.987384  | 0.051715037  | 0.477175 |
| 1000    | 1009.01 | 0.899379  | -0.244693643 | 0.893625 |
| 284.5   | 179.5   | 0.660422  | 0.751597003  | 0.50878  |

|         |         |          |              |          |
|---------|---------|----------|--------------|----------|
| 165     | 150.5   | 0.697449 | -0.858527574 | 0.753397 |
| 2427.08 | 2493.99 | 0.870346 | -0.330777801 | 0.853194 |
| 195     | 201.5   | 0.09735  | -2.099535674 | 0.088746 |
| 148     | 170.5   | 0.641486 | -1.389274403 | 0.566069 |
| 8475    | 9989    | 0.87827  | -0.271434102 | 0.756157 |
| 3860.99 | 4237.5  | 0.923606 | -0.160506435 | 0.8538   |
| 13.5    | 49.804  | 0.889022 | 0.470757618  | 0.431788 |
| 12539.8 | 12623   | 0.555242 | -0.583173444 | 0.547883 |
| 162     | 160.5   | 0.994381 | -0.008933125 | 0.99719  |
| 439.999 | 572.998 | 0.634709 | -0.584134826 | 0.3888   |
| 11      | 8.5     | 0.538908 | -1.289506617 | 0.699088 |
| 4058    | 4113.5  | 0.593667 | -0.697687076 | 0.581278 |
| 1690.53 | 1598.49 | 0.93302  | -0.135463638 | 0.973669 |
| 1762.5  | 1641    | 0.515558 | -0.76799249  | 0.583632 |
| 29.5    | 58.5    | 0.828874 | -0.456378295 | 0.355478 |
| 5408.5  | 6236.5  | 0.928689 | -0.190493663 | 0.841754 |
| 882     | 973.5   | 0.973282 | -0.062681233 | 0.908381 |
| 40.5    | 38.5    | 0.571369 | -0.982297998 | 0.608444 |
| 80.5    | 119.5   | 0.889556 | -0.353636955 | 0.659294 |
| 158     | 91      | 0.66591  | -0.749191896 | 0.983563 |
| 27.5    | 24.5    | 0.693675 | -0.652076697 | 0.781183 |
| 1691.5  | 1622    | 0.805706 | -0.41859567  | 0.836639 |
| 1207.5  | 1205.5  | 0.804084 | -0.336942175 | 0.805591 |
| 216     | 236     | 0.252241 | -1.884522783 | 0.209261 |
| 2755    | 2721    | 0.804185 | -0.425021588 | 0.813376 |
| 1       | 9.5     | 0.895282 | #NUM!        | 0.267163 |
| 122.5   | 174.5   | 0.634434 | 0.68541388   | 0.883567 |
| 13.5    | 12.5    | 0.425212 | -1.054447784 | 0.487732 |
| 13.5    | 17.5    | 0.81267  | 0.454565863  | 0.962003 |
| 1141    | 1092.5  | 0.717773 | -0.558961647 | 0.753096 |
| 1392.5  | 1430.5  | 0.883901 | -0.277926471 | 0.866069 |
| 4337.79 | 4336.48 | 0.635465 | -0.631548842 | 0.635741 |
| 4108.4  | 3694.99 | 0.482012 | -0.739677907 | 0.591039 |
| 2224.99 | 2223.5  | 0.795227 | -0.37811615  | 0.795803 |
| 159.5   | 164.5   | 0.793796 | -0.434769564 | 0.769984 |
| 350.5   | 378     | 0.963618 | -0.082583227 | 0.912538 |
| 301     | 331     | 0.685395 | -0.435958151 | 0.580691 |
| 5742.09 | 6558.22 | 0.634607 | -1.071349167 | 0.550786 |
| 1044.5  | 1280    | 0.915861 | -0.180740766 | 0.759962 |
| 740     | 1022.5  | 0.62287  | -1.096753233 | 0.417445 |
| 2146    | 1883.5  | 0.835537 | -0.402098444 | 0.917546 |
| 1241    | 1471.5  | 0.966607 | -0.090554111 | 0.865608 |
| 2022.52 | 2035.96 | 0.81606  | -0.394198235 | 0.811095 |
| 877     | 892     | 0.801789 | -0.371291569 | 0.787388 |
| 1105.5  | 1107.99 | 0.916524 | -0.167964406 | 0.914822 |
| 1764.5  | 1786    | 0.757978 | -0.346771659 | 0.744901 |
| 1445    | 1438    | 0.795599 | -0.536851845 | 0.798678 |
| 3044    | 2800.5  | 0.623553 | -0.710277968 | 0.694254 |
| 138.5   | 261     | 0.899284 | -0.306387244 | 0.49554  |
| 35      | 28.5    | 0.860535 | -0.296393003 | 1        |
| 7       | 1.5     | 0.303056 | -2.222392421 | 1        |
| 90.5    | 67.5    | 0.557167 | -1.024112456 | 0.763568 |
| 1245    | 1266    | 0.671644 | -0.598935443 | 0.65691  |
| 2566    | 2666.5  | 0.733631 | -0.620969484 | 0.705846 |
| 521     | 542     | 0.932702 | -0.139443189 | 0.903451 |
| 1352    | 1180.51 | 0.602384 | -0.747138658 | 0.717095 |



|         |         |          |              |          |
|---------|---------|----------|--------------|----------|
| 1271    | 1211    | 0.860661 | -0.31951805  | 0.893414 |
| 51.6489 | 41.7694 | 0.804966 | -0.424392644 | 0.950621 |
| 3       | 9       | 0.757899 | -2.584962501 | 0.334253 |
| 206     | 168.5   | 0.649508 | -0.521593601 | 0.853383 |
| 1116.87 | 1297.07 | 0.956101 | 0.105219273  | 0.9503   |
| 421.5   | 517.5   | 0.904624 | -0.201719433 | 0.744355 |
| 618.5   | 720.5   | 0.90495  | -0.195814188 | 0.784857 |
| 2103    | 2155    | 0.828389 | -0.375119826 | 0.81038  |
| 926     | 996     | 0.82171  | -0.368033362 | 0.764269 |
| 392.5   | 384.5   | 0.419997 | -0.755461938 | 0.441063 |
| 1312.5  | 1398.5  | 0.818284 | -0.410464769 | 0.772057 |
| 222     | 131     | 0.966804 | -0.049582029 | 0.649579 |
| 8216.5  | 11585.5 | 0.777173 | 0.468128739  | 0.984144 |
| 42392   | 45031.7 | 0.862313 | -0.342350934 | 0.822663 |
| 13.5    | 10      | 0.56161  | -1.169925001 | 0.751465 |
| 9       | 11.5    | 0.483158 | -1.847996907 | 0.349808 |
| 461     | 382.5   | 0.691051 | -0.785227859 | 0.811498 |
| 17.5    | 24      | 0.57086  | -1.807354922 | 0.405998 |
| 118     | 103.5   | 0.496366 | -0.975752454 | 0.603211 |
| 451     | 342     | 0.993315 | -0.008019448 | 0.724305 |
| 62      | 47      | 0.782358 | -0.384340702 | 0.992344 |
| 42.4171 | 47      | 0.925909 | -0.164829219 | 0.852761 |
| 106.372 | 124.807 | 0.938534 | 0.154660297  | 0.967291 |
| 1976.48 | 2248.46 | 0.995666 | 0.010581603  | 0.923472 |
| 7799.5  | 7775.5  | 0.512468 | -0.717277631 | 0.515532 |
| 5703    | 6059    | 0.660271 | -0.670754328 | 0.610029 |
| 2703.5  | 2662.5  | 0.723133 | -0.526399706 | 0.736054 |
| 202.5   | 162     | 0.942552 | 0.113008962  | 0.804432 |
| 1990.5  | 1694    | 0.72976  | -0.642067972 | 0.838585 |
| 14      | 13      | 0.566774 | -1.347923303 | 0.610883 |
| 4699.87 | 4395.86 | 0.393911 | -0.797408326 | 0.461747 |
| 1323.63 | 1191.64 | 0.503641 | -0.693835163 | 0.614632 |
| 1.5     | 3.5     | 0.895809 | 0.415037499  | 0.698091 |
| 0.5     | 1       | 0.622002 | 1            | 1        |
| 1228.5  | 1331.51 | 0.769604 | -0.524584815 | 0.710195 |
| 3222.02 | 2882.86 | 0.823779 | -0.300641513 | 0.921578 |
| 3149    | 2920    | 0.647155 | -0.57355413  | 0.719582 |
| 204.5   | 206.5   | 0.552536 | -0.843067019 | 0.544366 |
| 72      | 60.5    | 0.96247  | -0.071892918 | 0.914426 |
| 659.5   | 641     | 0.810648 | -0.252789342 | 0.842953 |
| 73      | 79.5    | 0.944953 | -0.113008962 | 0.880456 |
| 1121.5  | 988.5   | 0.835333 | 0.278707336  | 0.747692 |
| 2032    | 1459    | 0.476927 | -0.585672663 | 0.908039 |
| 1545    | 1519.5  | 0.60924  | -0.612537516 | 0.625645 |
| 850.5   | 944.5   | 0.584027 | -0.57482049  | 0.473626 |
| 66      | 51      | 0.663078 | -0.722466024 | 0.851604 |
| 51      | 30.5    | 0.781821 | -0.443606651 | 0.885209 |
| 5099.41 | 4874.38 | 0.622895 | -0.576874069 | 0.668425 |
| 290     | 272     | 0.74208  | -0.40512203  | 0.805077 |
| 872     | 670     | 0.8336   | -0.252484486 | 0.925623 |
| 149.5   | 186     | 0.69179  | -0.848962243 | 0.547191 |
| 36.5    | 33      | 0.924195 | 0.113956189  | 0.837173 |
| 92      | 82.5    | 0.878396 | 0.183797176  | 0.788666 |
| 2870.5  | 3096.5  | 0.818906 | -0.417636573 | 0.764483 |
| 1160    | 1162.5  | 0.769046 | -0.51902182  | 0.767472 |
| 4290.92 | 4126.39 | 0.582952 | -1.266171388 | 0.606657 |

|         |         |          |              |           |
|---------|---------|----------|--------------|-----------|
| 2863    | 3063    | 0.967028 | 0.082266182  | 0.993717  |
| 10.5    | 6.5     | 0.611386 | 0.415037499  | 0.312473  |
| 525     | 527.5   | 0.863934 | -0.299771681 | 0.860535  |
| 178     | 152.5   | 0.723773 | -0.694373717 | 0.823936  |
| 1586.5  | 1441.5  | 0.494471 | -1.787710755 | 0.547553  |
| 168.5   | 165     | 0.694896 | -0.58282359  | 0.712615  |
| 1178.5  | 1240.5  | 0.649134 | -0.736149706 | 0.608567  |
| 3162    | 2844    | 0.656301 | -0.640779715 | 0.746604  |
| 3584.77 | 3550.18 | 0.956129 | -0.104154864 | 0.9622    |
| 8       | 9.5     | 0.88627  | 0.247927513  | 1         |
| 314.499 | 320.501 | 0.556853 | -0.930589405 | 0.542162  |
| 2284    | 2135.5  | 0.627939 | -0.708714368 | 0.684618  |
| 3202.44 | 3396.96 | 0.778957 | -0.36914559  | 0.72289   |
| 4115.01 | 4039.65 | 0.93682  | -0.100274362 | 0.954016  |
| 1628.71 | 1465.29 | 0.825156 | -0.252980372 | 0.933506  |
| 3702.5  | 7290    | 0.55747  | -1.574093228 | 0.204049  |
| 3237    | 3224    | 0.557448 | -0.635994526 | 0.561621  |
| 1658.02 | 1877.09 | 0.913893 | -0.197613371 | 0.826667  |
| 507.974 | 604.918 | 0.872649 | -0.32609912  | 0.756996  |
| 1022    | 907     | 0.828402 | -0.308920428 | 0.927848  |
| 1598    | 1764.5  | 0.518641 | -0.819480862 | 0.432381  |
| 2731.01 | 2662.5  | 0.476123 | -0.765522596 | 0.501102  |
| 39.5    | 46      | 0.861521 | -0.326500825 | 0.753433  |
| 834.5   | 674.5   | 0.845648 | -0.181206283 | 0.903046  |
| 2254    | 1678    | 0.975968 | 0.046603543  | 0.792638  |
| 1605.5  | 1717.5  | 0.937041 | -0.133599919 | 0.887784  |
| 1.5     | 0.5     | 0.764931 | -0.584962501 | 0.764931  |
| 962     | 1274    | 0.656011 | -1.105762063 | 0.48659   |
| 741     | 11619   | 0.998485 | -0.031492547 | 0.255164  |
| 1443.98 | 1641.73 | 0.75037  | -0.603665662 | 0.658784  |
| 6092.5  | 6615.5  | 0.648632 | -0.59518094  | 0.571911  |
| 3962.5  | 3722.5  | 0.704    | -0.489948586 | 0.762995  |
| 205.5   | 223.5   | 0.579291 | -0.812629864 | 0.509888  |
| 989     | 1011    | 0.75269  | -0.609976708 | 0.737619  |
| 1628    | 1808.5  | 0.938803 | -0.129241478 | 0.860533  |
| 9052.5  | 7746.5  | 0.679258 | -0.443119062 | 0.849035  |
| 0       | 0.5     | 0.353387 | #DIV/0!      | 0.622002  |
| 8842.5  | 8913    | 0.661979 | -0.518950019 | 0.65394   |
| 88.0001 | 203     | 0.489476 | -1.101881253 | 0.0733175 |
| 636     | 572.5   | 0.753571 | -0.424139706 | 0.847736  |
| 613     | 577     | 0.752869 | -0.434784523 | 0.806681  |
| 515     | 412     | 0.707152 | -0.477047162 | 0.912276  |
| 2077.99 | 2211.54 | 0.866966 | -0.269044047 | 0.8179    |
| 918     | 986     | 0.773447 | -0.367630397 | 0.703644  |
| 237.5   | 248     | 0.840785 | -0.295593947 | 0.803884  |
| 749     | 754     | 0.866766 | -0.221269264 | 0.860609  |
| 1123.5  | 1047    | 0.771666 | -0.390633015 | 0.835458  |
| 426     | 422.001 | 0.84642  | -0.29177027  | 0.854152  |
| 737.498 | 694.503 | 0.812136 | -0.326822982 | 0.865194  |
| 1101.5  | 1050.5  | 0.819005 | -0.305162792 | 0.862163  |
| 1362    | 1409    | 0.835698 | -0.318093424 | 0.807854  |
| 185     | 276.501 | 0.739282 | 0.695025915  | 0.946162  |
| 1147    | 1269    | 0.78417  | -0.447687686 | 0.703547  |
| 335.668 | 298.994 | 0.642104 | -0.456015011 | 0.778668  |
| 742.5   | 635     | 0.957131 | -0.078866337 | 0.926309  |
| 85      | 79      | 0.62609  | -0.654503434 | 0.692112  |

|         |         |          |              |           |
|---------|---------|----------|--------------|-----------|
| 1174.5  | 1179.5  | 0.829922 | -0.372077165 | 0.826815  |
| 548.5   | 503.5   | 0.844658 | -0.236710453 | 0.928314  |
| 374.5   | 406     | 0.868382 | -0.322409716 | 0.814446  |
| 46      | 45      | 0.717611 | -0.546282033 | 0.73592   |
| 103     | 99      | 0.857431 | 0.208317236  | 0.822623  |
| 5.5     | 5       | 1        | 0            | 0.930262  |
| 51      | 41      | 0.696632 | -0.563900885 | 0.876448  |
| 1043.61 | 1048.35 | 0.861065 | -0.318107344 | 0.857932  |
| 1345.5  | 1527.5  | 0.895718 | -0.172339554 | 0.774307  |
| 2562    | 2441.5  | 0.957717 | -0.096040567 | 0.988589  |
| 142     | 188.5   | 0.850326 | -0.435501602 | 0.674376  |
| 453     | 468.001 | 0.956033 | -0.10740525  | 0.935798  |
| 0.5     | 0       | 0.495025 | 1.584962501  | 0.329316  |
| 13      | 35      | 0.921657 | -0.308122295 | 0.371995  |
| 360     | 338     | 0.735421 | -0.375509135 | 0.803325  |
| 2.5     | 4       | 1        | 0            | 0.651448  |
| 3539    | 3544.87 | 0.854109 | -0.309305371 | 0.852877  |
| 1581    | 1890    | 0.713926 | -0.635808573 | 0.576833  |
| 59      | 58      | 0.767578 | -0.439699554 | 0.781964  |
| 1311    | 1259.5  | 0.740625 | -0.512530919 | 0.773143  |
| 3656.5  | 3521    | 0.79247  | -0.425531313 | 0.821722  |
| 1430.49 | 1362.97 | 0.752164 | -0.423611919 | 0.796386  |
| 58      | 52.5    | 0.839658 | 0.351472371  | 0.786361  |
| 360.5   | 485     | 0.460689 | -1.901398412 | 0.302512  |
| 351     | 351     | 0.854017 | -0.354664881 | 0.854017  |
| 987.5   | 987.5   | 0.860071 | -0.332007301 | 0.860071  |
| 113.5   | 75.5    | 0.011107 | -1.287389676 | 0.0929094 |
| 110     | 88      | 0.695506 | -0.5334322   | 0.888727  |
| 2799.5  | 3052    | 0.88226  | -0.281028463 | 0.823547  |
| 678.5   | 802.5   | 0.703335 | -0.797026267 | 0.591058  |
| 1859    | 1841    | 0.624598 | -0.687258597 | 0.633096  |
| 6       | 15      | 0.88852  | -0.415037499 | 0.364203  |
| 33      | 23.5    | 0.95454  | 0.084888898  | 0.74548   |
| 413.5   | 328.5   | 0.790383 | -0.489619695 | 0.939087  |
| 710.5   | 679.5   | 0.528011 | -1.338264519 | 0.556225  |
| 810.087 | 842.93  | 0.807763 | -0.412964225 | 0.777647  |
| 34.9135 | 122.57  | 0.911103 | -0.567390342 | 0.367664  |
| 35.5    | 25      | 0.397688 | -1.062284278 | 0.699154  |
| 3206.5  | 3643    | 0.842918 | -0.393231629 | 0.756899  |
| 204.5   | 221     | 0.861457 | -0.296578666 | 0.802944  |
| 3511.5  | 3108.5  | 0.385533 | -0.79309726  | 0.513833  |
| 5405    | 5220    | 0.535573 | -0.800630921 | 0.566767  |
| 1220    | 1363    | 0.808186 | -0.405608086 | 0.721437  |
| 1194.4  | 1263.63 | 0.770404 | -0.481066926 | 0.726157  |
| 1556    | 1413.5  | 0.722252 | -0.450707769 | 0.813651  |
| 0.00222 | 0.00668 | 0.523843 | -0.961104823 | 0.0342223 |
| 2703.5  | 2910.51 | 0.906507 | -0.217299824 | 0.85603   |
| 817     | 879.5   | 0.910926 | -0.189369374 | 0.856295  |
| 132.5   | 114.5   | 0.973497 | -0.044224    | 0.907539  |
| 415.999 | 210.5   | 0.760477 | 0.406783441  | 0.462515  |
| 692.5   | 681     | 0.932842 | -0.11599814  | 0.94724   |
| 459.5   | 474     | 0.997283 | 0.004701889  | 0.976459  |
| 1.5     | 0.5     | 0.513713 | -1.584962501 | 1         |
| 612     | 702     | 0.843189 | -0.376273882 | 0.747055  |
| 0       | 0       | ?        | #DIV/0!      | ?         |
| 20.1103 | 27.0748 | 0.644122 | -1.424471361 | 0.485106  |

|         |         |          |              |          |
|---------|---------|----------|--------------|----------|
| 1.5     | 1.5     | 1        | 0            | 1        |
| 122.5   | 206.5   | 0.832238 | -0.570315725 | 0.525792 |
| 14599   | 14544.5 | 0.673101 | -1.002373668 | 0.675323 |
| 7051.45 | 5416.99 | 0.797812 | -0.429295053 | 0.979557 |
| 239.5   | 200.5   | 0.713263 | -0.533194439 | 0.86065  |
| 6.5     | 9.5     | 0.840484 | 0.387023123  | 0.919607 |
| 5       | 27      | 1        | 0            | 0.385812 |
| 3460    | 3959.5  | 0.862686 | -0.330553709 | 0.76928  |
| 2304.5  | 2176.51 | 0.684804 | -0.689447851 | 0.727819 |
| 5406    | 5893.5  | 0.932037 | -0.171226576 | 0.877797 |
| 1998    | 2325    | 0.942691 | -0.14695744  | 0.847127 |
| 13.5    | 21      | 0.601285 | -1.94753258  | 0.383265 |
| 1601    | 1884.5  | 0.965625 | -0.087293891 | 0.862957 |
| 1245.5  | 1234    | 0.827511 | -0.339994801 | 0.834922 |
| 1982.48 | 1753.53 | 0.665668 | -0.555961489 | 0.780282 |
| 9       | 9.5     | 0.963326 | -0.08246216  | 0.926774 |
| 1945.97 | 1908.47 | 0.802593 | -0.482801781 | 0.815582 |
| 2126.5  | 2246    | 0.827172 | -0.347769122 | 0.783412 |
| 1045    | 1215.5  | 0.891063 | -0.280255845 | 0.793111 |
| 588     | 589     | 0.798687 | -0.366782331 | 0.797214 |
| 3549    | 4157    | 0.885415 | -0.31366919  | 0.787837 |
| 15      | 10      | 0.463708 | -1           | 0.79822  |
| 8.5     | 11.5    | 0.90685  | -0.180572246 | 0.646023 |
| 658.5   | 512     | 0.477552 | -1.200648301 | 0.657346 |
| 290.5   | 334     | 0.953606 | -0.113616075 | 0.862826 |
| 1681.5  | 1914    | 0.946612 | -0.12120846  | 0.856078 |
| 10.5    | 8.5     | 0.711181 | -0.691877705 | 0.851698 |
| 584     | 655.5   | 0.999035 | -0.002472486 | 0.930211 |
| 7.5     | 5.5     | 0.863583 | 0.263034406  | 0.692068 |
| 6       | 3       | 0.411079 | -1.263034406 | 0.900374 |
| 11.5    | 22.5    | 0.837926 | 0.520832163  | 0.806433 |
| 61.5    | 53      | 0.462281 | -1.135159583 | 0.574946 |
| 683     | 641.5   | 0.69243  | -0.48648336  | 0.754025 |
| 64.5    | 67      | 0.884771 | 0.236700258  | 0.909629 |
| 2218.04 | 3028.4  | 0.786984 | -0.679409824 | 0.601021 |
| 1215.5  | 1149.5  | 0.800514 | -0.423170968 | 0.84213  |
| 467.5   | 371.5   | 0.582234 | -0.549150434 | 0.842859 |
| 75.5    | 74      | 0.814536 | 0.38364708   | 0.802817 |
| 2940.5  | 3278.5  | 0.844633 | 0.377511148  | 0.903746 |
| 2406    | 2519.5  | 0.825603 | -0.462996286 | 0.796587 |
| 1605    | 1525.5  | 0.753935 | -0.449912541 | 0.79772  |
| 1       | 2.5     | 0.739226 | 1            | 0.866773 |
| 34.5    | 31.5    | 0.396299 | -0.97924144  | 0.475721 |
| 471.817 | 855.111 | 0.981305 | -0.051634935 | 0.583131 |
| 1.5     | 8       | 0.716131 | 1.584962501  | 0.672759 |
| 12.5    | 14.5    | 0.93205  | -0.184424571 | 0.842774 |
| 30.5    | 21.5    | 0.56688  | -1.230297619 | 0.775775 |
| 2148.51 | 2144.45 | 0.866421 | -0.335681694 | 0.867619 |
| 197.5   | 206     | 0.779007 | -0.570426408 | 0.751293 |
| 596     | 595     | 0.906955 | -0.195414167 | 0.908179 |
| 54.2287 | 45.3263 | 0.738514 | -0.682571249 | 0.849465 |
| 474.5   | 421     | 0.861913 | -0.305301776 | 0.943172 |
| 1673    | 1605.5  | 0.762058 | -0.468038604 | 0.795409 |
| 1315.49 | 1540.99 | 0.763724 | -0.617393388 | 0.657025 |
| 49.5    | 26.5    | 0.978043 | -0.044394119 | 0.697383 |
| 379.5   | 412.5   | 0.901307 | -0.217016894 | 0.840896 |

|         |         |          |              |          |
|---------|---------|----------|--------------|----------|
| 7.5     | 6       | 0.792322 | -0.447458977 | 0.947192 |
| 255     | 199.5   | 0.903927 | -0.209718591 | 0.94138  |
| 187     | 310.5   | 0.615126 | -1.992305608 | 0.369946 |
| 3176.5  | 3297.5  | 0.732501 | -0.708780911 | 0.708031 |
| 146     | 392     | 0.912832 | -0.434937057 | 0.43949  |
| 8       | 3.5     | 0.675272 | 0.584962501  | 0.398265 |
| 3457.5  | 3092.5  | 0.726382 | -0.467224194 | 0.82746  |
| 17644.8 | 17534.8 | 0.867589 | -0.244395583 | 0.872814 |
| 11656.6 | 12053.1 | 0.745063 | -0.465440751 | 0.715614 |
| 202     | 187.5   | 0.592063 | -0.769468234 | 0.655194 |
| 90.5    | 189     | 0.943299 | -0.214443668 | 0.542059 |
| 996     | 1111    | 0.875687 | -0.309847718 | 0.803358 |
| 797.5   | 691     | 0.998001 | 0.004515481  | 0.913127 |
| 22      | 26.5    | 0.952164 | 0.095157233  | 0.904597 |
| 0.5     | 0       | 0.308068 | #NUM!        | 1        |
| 964.003 | 819.497 | 0.785639 | -0.322308647 | 0.945152 |
| 5       | 2.5     | 1        | 0            | 0.562529 |
| 2212    | 1436.5  | 0.831183 | 0.209664879  | 0.506014 |
| 4287    | 5576.38 | 0.727677 | -0.542185845 | 0.508003 |
| 9312.54 | 10151.9 | 0.61419  | -0.590160887 | 0.528295 |
| 702     | 633.5   | 0.79252  | -0.299244144 | 0.89921  |
| 337     | 182     | 0.908327 | 0.097250668  | 0.411966 |
| 91      | 67      | 0.516811 | -1.115477217 | 0.733397 |
| 162.5   | 141     | 0.94627  | 0.119228465  | 0.864628 |
| 104.5   | 95      | 0.886885 | 0.258425153  | 0.835453 |
| 537     | 527     | 0.992977 | -0.013495842 | 0.992977 |
| 6294.86 | 6103.13 | 0.686916 | -0.623552175 | 0.712133 |
| 6840    | 7326    | 0.874381 | -0.288440692 | 0.826184 |
| 3436.5  | 3292    | 0.611354 | -0.631355406 | 0.652525 |
| 2008.5  | 2460.5  | 0.695729 | -0.701595738 | 0.543928 |
| 659.5   | 610.5   | 0.976774 | -0.033192301 | 0.947403 |
| 8867.21 | 9403.51 | 0.772    | -0.505880322 | 0.728006 |
| 7548.4  | 7769.54 | 0.784698 | -0.485944489 | 0.763617 |
| 21334   | 20607.5 | 0.627406 | -0.715475429 | 0.65652  |
| 1470.5  | 1365.5  | 0.578563 | -0.640977108 | 0.653063 |
| 1753.5  | 1826.5  | 0.939777 | -0.11379841  | 0.906916 |
| 5589.5  | 4898.5  | 0.473419 | -1.191705133 | 0.568886 |
| 6330.14 | 6486.26 | 0.814483 | -0.44862261  | 0.797918 |
| 4895.5  | 4999    | 0.773181 | -0.4090088   | 0.754687 |
| 1842.5  | 1959    | 0.788368 | -0.456205315 | 0.741494 |
| 1498.51 | 1420    | 0.822336 | -0.28899324  | 0.872791 |
| 3190    | 3133.5  | 0.438564 | -0.553204484 | 0.461872 |
| 2092    | 1812.5  | 0.790038 | -0.393145641 | 0.906252 |
| 1048.49 | 1036.5  | 0.864884 | -0.309585239 | 0.872777 |
| 94.5    | 60.5    | 0.974217 | -0.038680468 | 0.688374 |
| 681.5   | 665.999 | 0.904064 | -0.201903373 | 0.920678 |
| 1007    | 928     | 0.739099 | -0.649418481 | 0.793307 |
| 3057.5  | 2598.5  | 0.504711 | -1.118705165 | 0.623372 |
| 1580.5  | 1448    | 0.787296 | -0.396745632 | 0.859948 |
| 274.5   | 162.5   | 0.635187 | 0.662550028  | 0.436966 |
| 2207.03 | 2327.96 | 0.842438 | -0.400583165 | 0.807817 |
| 986     | 704     | 0.322242 | -2.294392145 | 0.503762 |
| 3428    | 3483.52 | 0.778014 | -0.607115134 | 0.768002 |
| 2357.5  | 4562.5  | 0.89348  | -0.3552017   | 0.497621 |
| 248     | 292     | 0.490471 | -1.920773309 | 0.402546 |
| 1747    | 1643    | 0.630635 | -0.601991775 | 0.689402 |

|         |         |           |              |          |
|---------|---------|-----------|--------------|----------|
| 822.5   | 647.5   | 0.635648  | -0.66428114  | 0.838239 |
| 2892.98 | 3065.76 | 0.762407  | -0.43216397  | 0.711049 |
| 939.5   | 917     | 0.864453  | -0.222008573 | 0.886949 |
| 519     | 524.5   | 0.810029  | -0.322623202 | 0.800305 |
| 376.001 | 281.501 | 0.83125   | -0.266884926 | 0.916879 |
| 473.5   | 399.5   | 0.419878  | -1.152510995 | 0.552163 |
| 16173.6 | 15117.7 | 0.769496  | -0.460182214 | 0.822952 |
| 1645.79 | 114.65  | 0.519764  | 0.514162867  | 0.104317 |
| 2287    | 1934.5  | 0.489724  | -0.610900363 | 0.693264 |
| 1.96606 | 0.98303 | 0.483945  | -1.97530735  | 0.80998  |
| 84.5    | 94.5    | 0.633594  | -0.530514717 | 0.517099 |
| 2       | 1       | 0.0917211 | #NUM!        | 0.308068 |
| 47.5    | 39.5    | 0.911984  | -0.194816177 | 0.970578 |
| 0.5     | 0       | 0.308068  | #NUM!        | 1        |
| 37.5    | 44      | 0.821759  | -0.395928676 | 0.700679 |
| 1       | 2       | 0.806588  | -1           | 0.481309 |
| 19.5    | 30      | 0.6848    | -0.893084796 | 0.403696 |
| 1012.5  | 874.5   | 0.670749  | -0.523250296 | 0.812304 |
| 381.5   | 400.5   | 0.950928  | -0.112014874 | 0.918357 |
| 651.5   | 575.5   | 0.784268  | -0.393425058 | 0.888107 |
| 0       | 0       | 0.308068  | #DIV/0!      | 0.308068 |
| 42109.7 | 41137.4 | 0.932618  | -0.129972565 | 0.950635 |
| 1759.5  | 1928.5  | 0.839891  | -0.360989621 | 0.772948 |
| 505.5   | 509     | 0.843336  | -0.38165444  | 0.838768 |
| 1027.5  | 1160.5  | 0.875382  | -0.289818669 | 0.789338 |
| 655.002 | 564.498 | 0.779616  | -0.302782017 | 0.939331 |
| 14      | 27      | 0.733597  | 0.550197083  | 0.733597 |
| 79      | 78      | 0.929969  | -0.143909411 | 0.939276 |
| 15.5    | 12      | 0.62098   | -0.866733469 | 0.801376 |
| 0       | 0.5     | 1         | #DIV/0!      | 0.308068 |
| 0       | 1       | 0.622002  | #DIV/0!      | 0.622002 |
| 88.5    | 185.5   | 0.759216  | -1.008173931 | 0.364062 |
| 6.5     | 2.5     | 0.687562  | 0.621488377  | 0.412219 |
| 0.5     | 0.5     | 0.450185  | #NUM!        | 0.450185 |
| 3.5     | 2.5     | 0.898492  | -0.222392421 | 0.898492 |
| 3.5     | 7       | 0.89402   | 0.362570079  | 0.741279 |
| 2249.5  | 2781    | 0.918248  | -0.19177495  | 0.76776  |
| 882     | 443     | 0.792502  | 0.409506393  | 0.521809 |
| 454.5   | 264.5   | 0.978495  | 0.042228235  | 0.689019 |
| 1301    | 1453    | 0.699138  | -0.838601809 | 0.627745 |
| 0       | 0       | ?         | #DIV/0!      | ?        |
| 10279   | 10556   | 0.767677  | -0.441906567 | 0.745169 |
| 50.5    | 29      | 0.586249  | -0.549687026 | 0.847887 |
| 23068.3 | 21482.7 | 0.604528  | -0.488929572 | 0.690457 |
| 9522.5  | 10078   | 0.569578  | -0.543815592 | 0.505129 |
| 2959    | 3259    | 0.832857  | -0.399680076 | 0.765554 |
| 2657    | 2614.5  | 0.680277  | -0.556600973 | 0.694986 |
| 1640.99 | 1631.49 | 0.950068  | 0.098572377  | 0.945988 |
| 3199    | 4148.5  | 0.900529  | -0.273807931 | 0.736527 |
| 1246.5  | 1266.5  | 0.852702  | -0.366295088 | 0.842371 |
| 1036    | 1094.5  | 0.836088  | -0.293143931 | 0.787416 |
| 1322.01 | 1238.01 | 0.722587  | -0.505893964 | 0.779466 |
| 920.5   | 784     | 0.717859  | -0.425261056 | 0.878394 |
| 6289    | 5525    | 0.859228  | -0.259551737 | 0.962807 |
| 2742    | 2791.5  | 0.866802  | -0.319037185 | 0.854884 |
| 616.5   | 587     | 0.878893  | -0.255332546 | 0.914359 |

|         |         |          |              |          |
|---------|---------|----------|--------------|----------|
| 237     | 334.5   | 0.843223 | -0.413009818 | 0.607655 |
| 1093    | 1191.5  | 0.879716 | -0.294796064 | 0.822343 |
| 38      | 31.5    | 0.332233 | -1.440572591 | 0.462019 |
| 7508.97 | 7238.37 | 0.859495 | -0.301355741 | 0.886034 |
| 1374.46 | 1972.68 | 0.863637 | -0.372325701 | 0.623883 |
| 2986    | 3521.5  | 0.698449 | -0.711503966 | 0.577392 |
| 51      | 40      | 0.580627 | -1.11783649  | 0.735635 |
| 3622    | 3906.5  | 0.897435 | -0.261044207 | 0.849525 |
| 100     | 89.5    | 0.870302 | 0.244887059  | 0.798716 |
| 583     | 515.5   | 0.903485 | -0.183131607 | 0.997212 |
| 47.5    | 59      | 0.686081 | -0.841935154 | 0.539989 |
| 1414.49 | 1596.03 | 0.936205 | -0.141311902 | 0.849618 |
| 711     | 1007    | 0.703496 | -1.041163849 | 0.503514 |
| 746.5   | 850     | 0.920857 | -0.191955024 | 0.834254 |
| 1032    | 1769    | 0.772609 | -0.957301374 | 0.491417 |
| 3894.92 | 3839.99 | 0.803534 | -0.494716035 | 0.812795 |
| 16500   | 15123   | 0.803582 | -0.473202738 | 0.861073 |
| 4.5     | 4.5     | 1        | 0            | 1        |
| 1480.5  | 1750    | 0.887067 | -0.261573449 | 0.767227 |
| 213     | 244.5   | 0.666108 | -1.09808355  | 0.585499 |
| 477.5   | 519.5   | 0.982316 | 0.043157582  | 0.966473 |
| 625     | 502.5   | 0.972543 | -0.051698188 | 0.875336 |
| 2226.5  | 2663    | 0.961475 | -0.095422334 | 0.844932 |
| 370.5   | 307.499 | 0.823798 | -0.391227782 | 0.949344 |
| 260     | 254.5   | 0.865184 | -0.2410081   | 0.883497 |
| 9123.5  | 8968    | 0.546152 | -0.743595893 | 0.562193 |
| 8074    | 7958.5  | 0.475283 | -0.909785947 | 0.487696 |
| 1521.98 | 1851.61 | 0.722989 | -0.847591639 | 0.603081 |
| 3336.1  | 3126.42 | 0.795342 | -0.443656471 | 0.84279  |
| 4850    | 4449.5  | 0.788315 | -0.465486522 | 0.850284 |
| 4612.5  | 4779    | 0.849677 | -0.400462864 | 0.827802 |
| 1609.5  | 1733.5  | 0.697404 | -0.503284871 | 0.626593 |
| 2497    | 2377    | 0.66609  | -0.670350469 | 0.705947 |
| 1264    | 1241.5  | 0.888837 | -0.243760394 | 0.901457 |
| 480.5   | 401     | 0.861174 | 0.288824072  | 0.761407 |
| 255     | 218.5   | 0.978698 | -0.040157126 | 0.910508 |
| 393     | 592     | 0.987595 | 0.030870675  | 0.730438 |
| 165.5   | 101.5   | 0.853803 | -0.272655324 | 0.818774 |
| 494     | 447.5   | 0.915207 | -0.193479729 | 0.978743 |
| 2488.94 | 2698.47 | 0.692745 | -0.7509094   | 0.635515 |
| 1613.5  | 1877.5  | 0.764371 | -0.606129313 | 0.661103 |
| 229     | 278.5   | 0.660822 | -1.031848866 | 0.539596 |
| 2241.05 | 2207.12 | 0.922126 | -0.191614513 | 0.931567 |
| 8072.74 | 7648.66 | 0.834723 | -0.39313135  | 0.87055  |
| 2245.5  | 2488.5  | 0.910822 | -0.219557576 | 0.843545 |
| 2167    | 1778    | 0.76391  | -0.516857575 | 0.902768 |
| 54      | 61.5    | 0.596126 | -0.800691192 | 0.490426 |
| 1212.51 | 1237.99 | 0.863337 | -0.303471738 | 0.848469 |
| 910.5   | 868.5   | 0.951308 | -0.108575261 | 0.982275 |
| 210.5   | 183.5   | 0.632618 | -0.712051874 | 0.745592 |
| 2007.5  | 1439    | 0.912866 | 0.191521746  | 0.745344 |
| 4187.5  | 4211.06 | 0.772772 | -0.439673417 | 0.76812  |
| 1377.5  | 1422    | 0.837123 | -0.319312147 | 0.811347 |
| 3851    | 3522.5  | 0.46041  | -0.69427155  | 0.558696 |
| 174.5   | 145.5   | 0.519284 | -0.698890377 | 0.707416 |
| 62      | 54      | 0.928153 | -0.108706259 | 0.944072 |

|         |         |          |              |          |
|---------|---------|----------|--------------|----------|
| 0       | 1       | 1        | #DIV/0!      | 0.308068 |
| 411     | 468.999 | 0.987528 | -0.02656972  | 0.891596 |
| 255     | 301.5   | 0.842944 | -0.413152855 | 0.733325 |
| 266.5   | 260.5   | 0.846366 | -0.283204663 | 0.865462 |
| 426.999 | 378.501 | 0.898944 | -0.185419783 | 0.994087 |
| 1227.5  | 1196    | 0.782191 | -0.470344421 | 0.801596 |
| 1048    | 1096.5  | 0.891895 | -0.203700266 | 0.854479 |
| 791.5   | 824.5   | 0.90777  | -0.171064661 | 0.87377  |
| 8752.5  | 7143.5  | 0.38433  | -0.750490097 | 0.617196 |
| 1387.5  | 1245    | 0.634812 | -0.473209299 | 0.760835 |
| 4535    | 3799.5  | 0.628898 | -0.56168954  | 0.807018 |
| 2612    | 2519.54 | 0.5835   | -0.783933811 | 0.614096 |
| 1168.15 | 1053.81 | 0.609348 | -0.642425042 | 0.706818 |
| 281.5   | 249.5   | 0.714867 | -0.352356267 | 0.860771 |
| 1304.5  | 1326.5  | 0.801638 | -0.373433261 | 0.787498 |
| 80.5    | 74      | 0.750793 | -0.498026864 | 0.817474 |
| 200.5   | 237.5   | 0.890911 | 0.232124823  | 0.993736 |
| 51      | 54.5    | 0.817909 | 0.393663848  | 0.856977 |
| 65      | 58      | 0.680324 | -0.718587065 | 0.763269 |
| 4174    | 3779    | 0.64545  | -0.729152317 | 0.723877 |
| 1013    | 920     | 0.7772   | -0.327100009 | 0.87624  |
| 913.5   | 974.5   | 0.878902 | -0.248421131 | 0.828836 |
| 563.5   | 596     | 0.971825 | 0.065076203  | 0.992954 |
| 8177.93 | 8036.87 | 0.748979 | -0.449902444 | 0.764373 |
| 2060.46 | 2148.08 | 0.88602  | -0.272391094 | 0.858269 |
| 1054.5  | 920.007 | 0.868648 | -0.246311885 | 0.975217 |
| 1011.5  | 944.5   | 0.943905 | 0.122331252  | 0.902179 |
| 5706.36 | 5224.65 | 0.601761 | -0.752515925 | 0.676385 |
| 676     | 754.5   | 0.414486 | -1.025840005 | 0.329861 |
| 7098.47 | 7014.06 | 0.581843 | -0.58057715  | 0.594747 |
| 3836    | 3369    | 0.340458 | -0.60246254  | 0.519622 |
| 5132    | 4539    | 0.238019 | -0.770237064 | 0.367287 |
| 6026.9  | 5813.51 | 0.576591 | -0.704483653 | 0.610226 |
| 2552.01 | 2474.53 | 0.878674 | -0.212505064 | 0.905343 |
| 1125.99 | 1068    | 0.580895 | -1.153984725 | 0.615001 |
| 5.62479 | 7.68846 | 0.997871 | 0.006178389  | 0.822437 |
| 2554    | 2022.5  | 0.982289 | 0.030738419  | 0.813825 |
| 554.5   | 526     | 0.814784 | -0.278993295 | 0.867988 |
| 970     | 919.5   | 0.830773 | -0.379776395 | 0.868217 |
| 250     | 292     | 0.778585 | -0.586405918 | 0.67543  |
| 1302    | 1244.5  | 0.745819 | -0.523942902 | 0.781099 |
| 279.5   | 313     | 0.959648 | -0.079580561 | 0.870348 |
| 22.6626 | 26.1719 | 0.998585 | -0.002829265 | 0.887366 |
| 266     | 270.5   | 0.920134 | -0.166539187 | 0.907822 |
| 480.202 | 393.857 | 0.767523 | -0.461712972 | 0.918533 |
| 2725    | 2722    | 0.904218 | 0.200367279  | 0.903516 |
| 136.5   | 157.5   | 0.943954 | -0.132755209 | 0.847165 |
| 283.5   | 304     | 0.988591 | -0.023083613 | 0.936719 |
| 0.49274 | 0       | 0.308068 | #NUM!        | 1        |
| 0       | 2       | 0.622002 | #DIV/0!      | 0.198892 |
| 1.5     | 1.5     | 0.450185 | #NUM!        | 0.450185 |
| 113     | 111     | 0.75378  | -0.453856748 | 0.769189 |
| 6267.57 | 6463.68 | 0.953853 | -0.112736603 | 0.934702 |
| 266.5   | 275     | 0.571775 | -0.687304316 | 0.541911 |
| 1885    | 1781    | 0.944061 | -0.076217787 | 0.995958 |
| 3       | 4       | 0.738921 | 0.584962501  | 0.91071  |



|         |         |          |              |          |
|---------|---------|----------|--------------|----------|
| 832     | 1019.5  | 0.9084   | -0.256460176 | 0.785102 |
| 1504    | 1560.5  | 0.938065 | -0.13568212  | 0.912285 |
| 1272    | 1239.5  | 0.626122 | -0.998866251 | 0.643157 |
| 0       | 1       | 0.3832   | #DIV/0!      | 0.756486 |
| 0.5     | 1       | 0.622002 | #NUM!        | 0.353387 |
| 11.5    | 9.5     | 0.938372 | -0.131244533 | 0.938372 |
| 184.5   | 192     | 0.851245 | -0.289072267 | 0.81876  |
| 131     | 127     | 0.879524 | -0.285230152 | 0.899844 |
| 2       | 1.5     | 0.791627 | -0.415037499 | 1        |
| 0       | 1       | 1        | #DIV/0!      | 0.308068 |
| 11.5    | 14.5    | 0.273535 | -3.523561956 | 0.184083 |
| 862.409 | 868.409 | 0.899798 | -0.16977027  | 0.893576 |
| 1.5     | 0       | 0.034897 | #NUM!        | 1        |
| 348.5   | 386.5   | 0.767281 | -0.44219983  | 0.678292 |
| 2157.5  | 1992.5  | 0.830632 | -0.331572655 | 0.892945 |
| 401     | 531     | 0.896152 | -0.272418995 | 0.709821 |
| 1889    | 1738    | 0.654591 | -0.579055665 | 0.732398 |
| 772.5   | 1076.5  | 0.809407 | -0.363370687 | 0.519017 |
| 1755.5  | 1674.5  | 0.521574 | -0.621583205 | 0.57438  |
| 1665.5  | 1556.5  | 0.870182 | -0.247954583 | 0.923636 |
| 1243    | 1494    | 0.897589 | -0.24618758  | 0.769944 |
| 57      | 73.5001 | 0.847382 | -0.278301162 | 0.617272 |
| 9       | 10.5    | 0.931134 | -0.169925001 | 0.829576 |
| 0.5     | 0       | 1        | 0            | 0.450185 |
| 892.502 | 875.001 | 0.755608 | -0.36395952  | 0.776168 |
| 5708.5  | 6440    | 0.89014  | -0.30272284  | 0.817404 |
| 2936.98 | 2690.5  | 0.680622 | -0.521527296 | 0.764162 |
| 51      | 81.5    | 0.563474 | -3.087462841 | 0.356847 |
| 81.9384 | 91.7805 | 0.93262  | -0.113459538 | 0.82744  |
| 239.562 | 295.72  | 0.883584 | -0.188231526 | 0.673943 |
| 0.5     | 1       | 1        | 0            | 0.651448 |
| 771     | 738     | 0.676744 | -0.520466105 | 0.719204 |
| 1485.5  | 1417    | 0.573693 | -0.838028223 | 0.612394 |
| 875     | 906.999 | 0.819401 | -0.367997744 | 0.791053 |
| 13      | 14      | 0.47679  | -1.378511623 | 0.428902 |
| 510     | 607     | 0.455256 | -1.350497247 | 0.343228 |
| 1022    | 1157    | 0.982502 | -0.040078891 | 0.89856  |
| 150.5   | 177     | 0.522894 | -2.004800986 | 0.438861 |
| 1797    | 2397    | 0.886166 | -0.338683854 | 0.713207 |
| 4       | 2       | 0.714152 | 0.584962501  | 0.479515 |
| 2251.5  | 2081.5  | 0.868483 | -0.24071687  | 0.932745 |
| 595.5   | 468.5   | 0.584553 | -0.557961805 | 0.850955 |
| 85.4908 | 128.06  | 0.322138 | -1.169769756 | 0.11068  |
| 278.5   | 304     | 0.994935 | -0.010397847 | 0.930494 |
| 2       | 1.5     | 0.499897 | 1            | 0.409442 |
| 4047.28 | 3270.37 | 0.556384 | -1.494414755 | 0.674485 |
| 6838.71 | 5227.41 | 0.475397 | -1.928936862 | 0.618377 |
| 2068    | 2065    | 0.860539 | -0.34735263  | 0.861469 |
| 818.499 | 918.988 | 0.88611  | -0.308317287 | 0.815098 |
| 844     | 1062    | 0.912878 | -0.251457371 | 0.776247 |
| 0.5     | 0.5     | 1        | 0            | 1        |
| 1958.5  | 2016    | 0.731453 | -0.524552146 | 0.707352 |
| 864.5   | 945.5   | 0.924062 | -0.178293326 | 0.863589 |
| 2907.5  | 2987.5  | 0.669764 | -0.606584272 | 0.64597  |
| 471.501 | 596.499 | 0.945088 | -0.153199968 | 0.803545 |
| 1582.98 | 1272.02 | 0.531761 | -1.434901952 | 0.660867 |

|         |         |          |              |          |
|---------|---------|----------|--------------|----------|
| 1223.5  | 1288.51 | 0.852318 | -0.31282433  | 0.813101 |
| 2666    | 2935    | 0.855063 | -0.266718899 | 0.771483 |
| 1887.53 | 1809    | 0.73553  | -0.536324263 | 0.769293 |
| 37      | 45.5    | 0.583698 | -1.30256277  | 0.458403 |
| 11475.5 | 10101.2 | 0.740978 | -0.470737607 | 0.849553 |
| 1210    | 1267.49 | 0.828156 | -0.40395986  | 0.795784 |
| 767.5   | 642     | 0.706962 | -0.549223978 | 0.854279 |
| 2494    | 2829    | 0.954265 | -0.110880919 | 0.871984 |
| 180     | 156     | 0.629556 | -0.520309542 | 0.784045 |
| 1470.5  | 1038.5  | 0.333183 | -0.746480788 | 0.774171 |
| 2214    | 2211    | 0.9291   | -0.163342351 | 0.929994 |
| 450.5   | 429     | 0.678152 | -0.678392184 | 0.716168 |
| 1665.5  | 1667.5  | 0.752731 | -0.582150018 | 0.751882 |
| 1455    | 1696    | 0.930598 | -0.186002889 | 0.83705  |
| 1544.5  | 1366.5  | 0.590235 | -0.544437282 | 0.728829 |
| 696.5   | 732     | 0.896507 | -0.212758362 | 0.858585 |
| 2493    | 2415    | 0.774042 | -0.477117546 | 0.798252 |
| 556     | 539.5   | 0.873315 | -0.256303715 | 0.896185 |
| 797     | 822.5   | 0.928109 | -0.145581294 | 0.904303 |
| 448.502 | 421.501 | 0.691697 | -0.582553599 | 0.744215 |
| 2503.07 | 2423.94 | 0.768679 | -0.530868267 | 0.791532 |
| 527     | 475.5   | 0.956336 | 0.073384499  | 0.875273 |
| 8098.5  | 8090.5  | 0.860827 | -0.192072587 | 0.861913 |
| 1847.5  | 2077    | 0.707435 | -0.588089449 | 0.610923 |
| 1450.5  | 1434    | 0.773615 | -0.440288442 | 0.783017 |
| 1366    | 1528    | 0.934666 | -0.166628316 | 0.864427 |
| 417.5   | 424     | 0.938671 | -0.145299553 | 0.928744 |
| 12662   | 12003   | 0.827875 | -0.394598003 | 0.864668 |
| 168.5   | 484     | 0.35149  | 1.601977187  | 0.935256 |
| 3.5     | 2.5     | 0.628092 | -1.222392421 | 0.805463 |
| 262.5   | 220.5   | 0.785681 | -0.414121793 | 0.921805 |
| 2920.5  | 2484    | 0.519073 | -0.507076991 | 0.741991 |
| 549     | 326     | 0.862473 | 0.270025068  | 0.61417  |
| 3.5     | 5       | 0.626095 | -1.222392421 | 0.413611 |
| 757.004 | 1058.5  | 0.905335 | -0.260369517 | 0.689051 |
| 1260.5  | 1353.99 | 0.922256 | -0.19650571  | 0.877428 |
| 2739.55 | 3070.56 | 0.919548 | -0.194527835 | 0.84366  |
| 3452    | 4254.79 | 0.910613 | -0.240945411 | 0.779292 |
| 8       | 5.5     | 0.847091 | -0.299560282 | 0.897511 |
| 4629.92 | 4564.88 | 0.84905  | -0.327671441 | 0.85931  |
| 1635.02 | 1503    | 0.952202 | -0.108039648 | 0.994304 |
| 2895    | 3303.5  | 0.945257 | -0.138774851 | 0.861953 |
| 90.5    | 55.0682 | 0.851569 | -0.305886921 | 0.844408 |
| 22      | 27.9318 | 0.767554 | -0.52486794  | 0.585249 |
| 13653   | 20263.8 | 0.817322 | -0.521175949 | 0.55953  |
| 4059.01 | 7492.95 | 0.665675 | -1.209254116 | 0.319915 |
| 3717.5  | 3893.5  | 0.759144 | -0.518876206 | 0.723635 |
| 19.5    | 22      | 0.719091 | -0.641546029 | 0.628906 |
| 7079.03 | 7804.77 | 0.837119 | -0.423213237 | 0.773828 |
| 199.5   | 325.499 | 0.845267 | -0.495586693 | 0.548346 |
| 2454.5  | 2489.93 | 0.974113 | -0.058758997 | 0.96476  |
| 896.507 | 634.002 | 0.612846 | -1.004040016 | 0.829929 |
| 7158.09 | 6862.62 | 0.840995 | -0.394859916 | 0.867972 |
| 4182    | 4101.5  | 0.968691 | -0.062931256 | 0.982806 |
| 0       | 0.5     | 0.450185 | #DIV/0!      | 1        |
| 29134.2 | 30249.3 | 0.251544 | -0.919567894 | 0.223087 |

|         |         |           |              |           |
|---------|---------|-----------|--------------|-----------|
| 6801.75 | 6202.7  | 0.604811  | -0.631721191 | 0.694155  |
| 6072    | 6063.5  | 0.0628144 | -1.087418292 | 0.0632072 |
| 9637    | 8467.5  | 0.459063  | -0.657057588 | 0.610822  |
| 8722.5  | 7153    | 0.127242  | -1.021747699 | 0.26933   |
| 11373.8 | 10674.4 | 0.169171  | -0.939853639 | 0.214126  |
| 8314.5  | 8318.5  | 0.159257  | -0.824965349 | 0.158932  |
| 8745    | 4905.5  | 0.213438  | -0.988825179 | 0.867836  |
| 5422.5  | 4654    | 0.555165  | -0.63759252  | 0.716281  |
| 6872    | 6462    | 0.0320497 | -1.070336844 | 0.0435612 |
| 9612.5  | 7955    | 0.244804  | -0.840527022 | 0.443977  |
| 529.5   | 405     | 0.405972  | -0.636975886 | 0.763695  |
| 158510  | 151437  | 0.722455  | -0.579924469 | 0.757915  |
| 35      | 51      | 0.518956  | -1.321928095 | 0.289392  |
| 3633.06 | 3110    | 0.616792  | -0.611436477 | 0.766889  |
| 3675.18 | 3780.58 | 0.711985  | -0.70629421  | 0.692274  |
| 1890.5  | 1815.5  | 0.887236  | -0.230363661 | 0.917348  |
| 109.5   | 228.5   | 0.840799  | -0.53638232  | 0.397295  |
| 7139.5  | 5919    | 0.545316  | -0.688027928 | 0.733619  |
| 7229    | 6356.5  | 0.444486  | -0.980179726 | 0.554585  |
| 1.5     | 1       | 0.391002  | -1.584962501 | 0.651448  |
| 1315    | 1361.5  | 0.696056  | -0.339867145 | 0.649742  |
| 2735    | 2162    | 0.0574643 | -1.477011521 | 0.136377  |
| 2954.47 | 2887.38 | 0.765774  | -0.518484246 | 0.782676  |
| 6169.9  | 5909.67 | 0.604937  | -0.800275641 | 0.63961   |
| 981.396 | 886.924 | 0.706879  | -0.524704081 | 0.795512  |
| 75.5    | 66.5    | 0.387312  | -1.431049817 | 0.473384  |
| 2694.5  | 2314.5  | 0.441629  | -0.888007231 | 0.583205  |
| 3185    | 2725.5  | 0.467903  | -1.019610192 | 0.594922  |
| 5984    | 4799.5  | 0.365509  | -0.861707663 | 0.593462  |
| 1       | 0       | 0.308068  | #NUM!        | 1         |
| 1753.03 | 1806.98 | 0.959715  | -0.093930965 | 0.940095  |
| 18.5    | 13      | 0.609498  | 0.878009476  | 0.497296  |
| 13632.5 | 14316   | 0.876983  | -0.283165039 | 0.843002  |
| 970     | 1166    | 0.739792  | -0.849038403 | 0.632964  |
| 2178    | 2754.5  | 0.592086  | -1.433257516 | 0.458213  |
| 1078    | 1149    | 0.922378  | 0.160077215  | 0.965881  |
| 2042.5  | 1789    | 0.772385  | -0.462303974 | 0.873511  |
| 56.5    | 52.5    | 0.959922  | -0.092258508 | 0.99427   |
| 1558.27 | 1445.76 | 0.767905  | -0.588921226 | 0.816323  |
| 2009.24 | 1741.25 | 0.851441  | -0.289878445 | 0.959956  |
| 1093    | 1075    | 0.650887  | -0.613287485 | 0.665908  |
| 992     | 978     | 0.513372  | -0.666483931 | 0.52838   |
| 20247   | 23042.5 | 0.498924  | -0.853823043 | 0.389327  |
| 184     | 192.5   | 0.857801  | -0.247437551 | 0.817144  |
| 622.5   | 360     | 0.375876  | -0.717780537 | 0.942267  |
| 1330.5  | 1560    | 0.968094  | -0.079117388 | 0.865909  |
| 1174    | 1266    | 0.880055  | -0.279098842 | 0.827727  |
| 3251    | 3363.5  | 0.928349  | -0.184616212 | 0.907835  |
| 1766    | 2078    | 0.747254  | -0.759054742 | 0.64781   |
| 4764.5  | 5025    | 0.839833  | -0.393150366 | 0.804178  |
| 625.5   | 487.5   | 0.607029  | -1.162161601 | 0.753405  |
| 586.5   | 597     | 0.826158  | -0.328708558 | 0.811315  |
| 4518.5  | 4818.5  | 0.830793  | -0.401636693 | 0.786128  |
| 4208    | 3773.5  | 0.624291  | -0.559633853 | 0.736451  |
| 440.5   | 482.5   | 0.894416  | -0.267302312 | 0.835979  |
| 483.5   | 497     | 0.85324   | -0.37047762  | 0.835529  |

|         |         |          |              |           |
|---------|---------|----------|--------------|-----------|
| 661.5   | 558     | 0.50746  | -0.745715856 | 0.677083  |
| 3195    | 3183.5  | 0.728365 | -0.496941973 | 0.731519  |
| 994     | 1123.5  | 0.723924 | -0.631796586 | 0.632517  |
| 1083.5  | 893.499 | 0.541619 | -0.611841621 | 0.757442  |
| 10992   | 9408    | 0.912908 | -0.18650817  | 0.983551  |
| 1192.5  | 1268    | 0.629565 | -0.730929204 | 0.578823  |
| 1049    | 1159.5  | 0.887407 | -0.247712638 | 0.813956  |
| 2.5     | 1       | 0.495025 | -0.736965594 | 0.724378  |
| 6       | 9       | 0.200228 | -2.584962501 | 0.0790957 |
| 2.5     | 1       | 0.495025 | -0.736965594 | 0.724378  |
| 0       | 1       | 0.308068 | #DIV/0!      | 0.308068  |
| 1540    | 1446.01 | 0.923531 | -0.161412269 | 0.96756   |
| 1378.5  | 1232    | 0.923723 | 0.157017898  | 0.854163  |
| 4349.5  | 3985    | 0.631027 | -0.602314425 | 0.714555  |
| 1067    | 944     | 0.745412 | -0.437292641 | 0.854953  |
| 5754.92 | 5871.12 | 0.712955 | -0.636911923 | 0.697917  |
| 1317.49 | 1262.99 | 0.802526 | -0.242690453 | 0.854194  |
| 81      | 87.5    | 0.921261 | 0.167944637  | 0.972379  |
| 239.5   | 212.5   | 0.708223 | -0.728956163 | 0.787459  |
| 147     | 179.5   | 0.580906 | -1.317029295 | 0.460243  |
| 17      | 41.5    | 0.974615 | -0.087462841 | 0.443284  |
| 25.5    | 30      | 0.955647 | -0.11783649  | 0.856956  |
| 607     | 495     | 0.716855 | -0.64936295  | 0.857363  |
| 1046    | 964.5   | 0.898123 | -0.185177085 | 0.963884  |
| 1071.99 | 831.489 | 0.56283  | -1.168230276 | 0.724966  |
| 7845.51 | 4456.49 | 0.973588 | 0.031961644  | 0.518769  |
| 414.5   | 381     | 0.969235 | 0.054641136  | 0.905138  |
| 269     | 385     | 0.951241 | 0.125754331  | 0.820167  |
| 480.5   | 362     | 0.82088  | -0.301062307 | 0.943907  |
| 238     | 357     | 0.878319 | -0.363436303 | 0.626407  |
| 169.341 | 137.103 | 0.66842  | -0.635775253 | 0.839703  |
| 32.5    | 35.5    | 0.709698 | -0.562936194 | 0.635036  |
| 431     | 589.5   | 0.88162  | -0.331583881 | 0.681906  |
| 12193.5 | 13741.5 | 0.838737 | -0.382996876 | 0.75456   |
| 358.501 | 398.501 | 0.742989 | -0.624746427 | 0.668039  |
| 9719.69 | 9430.07 | 0.774894 | -0.43557883  | 0.799726  |
| 765.5   | 761.5   | 0.863591 | -0.2381839   | 0.868206  |
| 1924    | 2238    | 0.985855 | 0.024534957  | 0.880257  |
| 1258.5  | 1274    | 0.753673 | -0.630377959 | 0.745556  |
| 709.001 | 731.004 | 0.984463 | -0.033981924 | 0.963768  |
| 1804    | 1807    | 0.621699 | -0.505791608 | 0.619829  |
| 468     | 426.5   | 0.760992 | -0.425349874 | 0.841836  |
| 71      | 73      | 0.762861 | -0.477321778 | 0.740415  |
| 16.5    | 20      | 0.754399 | -0.584962501 | 0.614057  |
| 2296.47 | 2232.03 | 0.790109 | -0.49809068  | 0.809646  |
| 856.992 | 1010.5  | 0.966059 | -0.082232834 | 0.857468  |
| 1236.5  | 1011.5  | 0.99806  | -0.00408944  | 0.877974  |
| 229     | 225     | 0.837199 | -0.288457003 | 0.852595  |
| 1067    | 1090.5  | 0.617083 | -0.7362897   | 0.598769  |
| 993.7   | 1034.06 | 0.671171 | -0.634096153 | 0.637552  |
| 945     | 887.5   | 0.9475   | -0.111855945 | 0.990308  |
| 1083.5  | 990     | 0.786688 | -0.490896388 | 0.849061  |
| 1473.5  | 1439.5  | 0.954049 | -0.108233818 | 0.968704  |
| 2525.5  | 1776    | 0.497209 | -1.82459506  | 0.682089  |
| 101.5   | 96      | 0.53184  | -1.55681146  | 0.563867  |
| 580.5   | 477.5   | 0.767439 | -0.537296067 | 0.898277  |

|         |         |          |              |          |
|---------|---------|----------|--------------|----------|
| 930     | 697.5   | 0.955476 | 0.080694336  | 0.767178 |
| 595.5   | 605     | 0.954704 | -0.087387135 | 0.942439 |
| 253     | 443.5   | 0.537053 | -1.467293736 | 0.227066 |
| 2937.98 | 3094.49 | 0.714319 | -0.558826385 | 0.67092  |
| 3275.5  | 1667    | 0.731873 | 0.34486838   | 0.366922 |
| 1768    | 2206    | 0.397927 | -0.576622612 | 0.183393 |
| 626     | 620     | 0.750598 | -0.350439633 | 0.761147 |
| 6502.5  | 6230    | 0.771081 | -0.503915441 | 0.802488 |
| 552     | 646     | 0.888869 | -0.227410496 | 0.763522 |
| 13      | 9       | 0.68251  | -0.612976877 | 0.963173 |
| 265.5   | 262     | 0.441035 | -1.601356939 | 0.449145 |
| 15335.3 | 11573   | 0.358441 | -1.258374604 | 0.575749 |
| 28.5    | 29      | 0.601441 | 0.542149417  | 0.614829 |
| 1542.5  | 1705    | 0.874969 | -0.297583125 | 0.806104 |
| 6889.42 | 7577    | 0.849045 | -0.359087057 | 0.78293  |
| 2817.54 | 2969.05 | 0.915073 | -0.212892133 | 0.882113 |
| 880     | 694.5   | 0.942692 | -0.09398403  | 0.866572 |
| 686     | 712     | 0.8634   | -0.257157839 | 0.832356 |
| 164.5   | 162.5   | 0.974343 | 0.051684155  | 0.965798 |
| 1357.51 | 1158.52 | 0.690177 | -0.526413609 | 0.833839 |
| 1884.5  | 1679.5  | 0.907044 | -0.163146618 | 0.99838  |
| 959.5   | 1015.5  | 0.975239 | -0.052049816 | 0.934555 |
| 391.999 | 401.501 | 0.927249 | -0.165557518 | 0.91108  |
| 636.5   | 653     | 0.94136  | 0.142337711  | 0.955993 |
| 86.5    | 83.5    | 0.97321  | -0.050923935 | 1        |
| 2042.5  | 1696.5  | 0.69164  | -0.438656661 | 0.886915 |
| 1222    | 1385    | 0.59611  | -0.773229138 | 0.491783 |
| 345.5   | 355.5   | 0.662435 | -0.770763803 | 0.641291 |
| 120     | 190     | 0.865563 | -0.263035849 | 0.46783  |
| 3194.5  | 3162    | 0.101716 | -0.793142723 | 0.107084 |
| 2291.01 | 2141.51 | 0.681645 | -0.580576876 | 0.740437 |
| 476.5   | 667     | 0.73921  | -0.896332404 | 0.544913 |
| 1222    | 1128    | 0.699577 | -0.460612703 | 0.780108 |
| 185.5   | 180     | 0.569252 | -0.787082527 | 0.595305 |
| 557.001 | 740.501 | 0.961508 | 0.091565681  | 0.846388 |
| 1240    | 1019.02 | 0.617046 | -0.666029727 | 0.792114 |
| 192.5   | 214     | 0.983741 | 0.033337184  | 0.938664 |
| 2732.49 | 2929.01 | 0.992454 | 0.017063264  | 0.961941 |
| 443.5   | 464.5   | 0.797208 | -0.547237588 | 0.768059 |
| 719.505 | 726.5   | 0.940696 | -0.142117259 | 0.934571 |
| 2       | 4.5     | 0.823154 | -1           | 0.456318 |
| 3751.95 | 2632.57 | 0.679738 | -0.501365175 | 0.994542 |
| 1206    | 1251    | 0.880119 | -0.273841161 | 0.854657 |
| 1.5     | 5       | 0.892135 | -0.584962501 | 0.323206 |
| 44.5    | 21.5    | 0.909325 | 0.10922907   | 0.417832 |
| 500     | 617     | 0.909861 | -0.231074664 | 0.77164  |
| 1382.5  | 1313    | 0.721456 | -0.535974637 | 0.764313 |
| 5118    | 4918    | 0.920625 | -0.183572757 | 0.94651  |
| 3094    | 2606    | 0.790576 | -0.495580927 | 0.902793 |
| 5553.5  | 5627.5  | 0.830141 | -0.376123613 | 0.820534 |
| 67      | 40.5    | 0.503426 | 0.798096954  | 0.328515 |
| 353.5   | 525     | 0.688214 | -1.073248982 | 0.457195 |
| 3392.99 | 3139.48 | 0.903705 | -0.221280247 | 0.954165 |
| 1018.5  | 839     | 0.77446  | -0.506400956 | 0.907091 |
| 3385.43 | 3485.11 | 0.832166 | -0.468307301 | 0.81482  |
| 1363.01 | 1269    | 0.610625 | -0.57023166  | 0.685252 |

|         |         |          |              |            |
|---------|---------|----------|--------------|------------|
| 6672.5  | 5815.5  | 0.422368 | -1.125167293 | 0.530517   |
| 675.5   | 521     | 0.999181 | 0.001067477  | 0.752648   |
| 0       | 4.5     | 0.545627 | #DIV/0!      | 0.0978136  |
| 8       | 9       | 0.504977 | -1.192645078 | 0.424038   |
| 139     | 161.5   | 0.731835 | 0.608979382  | 0.811539   |
| 236.5   | 265     | 0.839834 | -0.455243822 | 0.771137   |
| 1469    | 1712    | 0.535954 | -0.950763072 | 0.418367   |
| 1529.51 | 1500.5  | 0.71959  | -0.486783844 | 0.73706    |
| 200     | 252.5   | 0.866433 | -0.33551716  | 0.70629    |
| 217.5   | 220.5   | 0.902495 | -0.229596214 | 0.893435   |
| 893.5   | 936.5   | 0.836027 | -0.381259153 | 0.803045   |
| 374.5   | 396     | 0.875512 | -0.317600728 | 0.840022   |
| 1542    | 1281    | 0.484588 | -0.909348638 | 0.646851   |
| 75.5    | 103     | 0.944834 | -0.150941898 | 0.749027   |
| 384.5   | 448.5   | 0.975909 | -0.055458327 | 0.870447   |
| 37.5    | 45.5    | 0.968412 | 0.074962058  | 0.905546   |
| 1.5     | 1       | 0.806588 | 0.415037499  | 0.630057   |
| 39.5    | 28      | 0.501292 | -1.349584438 | 0.717874   |
| 504     | 549     | 0.578186 | -0.449802917 | 0.467938   |
| 2363.5  | 2280    | 0.791876 | -0.441423051 | 0.818959   |
| 297     | 328     | 0.292237 | -1.975914381 | 0.242197   |
| 442.217 | 463.531 | 0.330058 | -0.517012257 | 0.271159   |
| 427.5   | 452.5   | 0.908832 | -0.179447776 | 0.863829   |
| 6.5     | 5.5     | 0.900221 | -0.2410081   | 1          |
| 17.5    | 14.5    | 0.547241 | -0.669851398 | 0.739837   |
| 496.943 | 486.322 | 0.996159 | -0.009656152 | 0.991537   |
| 70.6001 | 70.5539 | 0.991959 | 0.017633245  | 0.991532   |
| 0.5     | 1       | 0.481309 | 2            | 0.630057   |
| 64      | 57.5    | 0.469652 | -1.022720077 | 0.556217   |
| 318     | 273.5   | 0.983393 | 0.029191713  | 0.870583   |
| 136     | 126.5   | 0.734167 | -0.345995855 | 0.818315   |
| 428.5   | 548     | 0.988266 | 0.031635665  | 0.86515    |
| 974.5   | 1026.5  | 0.660013 | -1.038254098 | 0.628561   |
| 4959.5  | 4498.5  | 0.676447 | -0.860765366 | 0.739133   |
| 4409    | 3637    | 0.372527 | -0.960303616 | 0.551371   |
| 154.5   | 140     | 0.646786 | -0.536753408 | 0.746646   |
| 2300.98 | 2770.98 | 0.757244 | -0.722490164 | 0.642645   |
| 2156.5  | 2434.5  | 0.944624 | 0.125509139  | 0.976814   |
| 2006.5  | 2115.03 | 0.208632 | -0.876387755 | 0.172028   |
| 6223    | 7249    | 0.906126 | -0.255634768 | 0.812882   |
| 29      | 32.5    | 0.687917 | -0.903784685 | 0.61605    |
| 1549.5  | 1637    | 0.952653 | -0.095739905 | 0.911217   |
| 7       | 6.5     | 1        | 0            | 0.942559   |
| 718.082 | 799.318 | 0.248521 | -0.69540318  | 0.161303   |
| 900.5   | 992.5   | 0.953557 | -0.090921521 | 0.876542   |
| 18      | 37      | 0.18263  | -0.646363045 | 0.00657198 |
| 1308.49 | 1418.51 | 0.793464 | -0.456598055 | 0.732812   |
| 5962.5  | 5857.5  | 0.589283 | -0.652387823 | 0.606523   |
| 73      | 158.5   | 0.987153 | -0.040077439 | 0.500129   |
| 607.501 | 603.997 | 0.626829 | -0.522232531 | 0.633111   |
| 1895.5  | 1810.5  | 0.509325 | -0.719064045 | 0.555515   |
| 106     | 143     | 0.94111  | -0.142957954 | 0.731222   |
| 777.5   | 777     | 0.785646 | -0.375082922 | 0.786225   |
| 756     | 632     | 0.580213 | -0.521952703 | 0.79476    |
| 738.5   | 794     | 0.817411 | -0.158856764 | 0.69399    |
| 985     | 976     | 0.982679 | 0.036159663  | 0.976445   |

|         |         |          |              |          |
|---------|---------|----------|--------------|----------|
| 0       | 0       | ?        | #DIV/0!      | ?        |
| 2       | 3.5     | 0.739226 | -1           | 0.428621 |
| 61      | 120     | 0.751547 | 0.727474145  | 0.879583 |
| 424.5   | 512.5   | 0.871108 | -0.333015962 | 0.746683 |
| 11.649  | 53.298  | 0.880605 | -1.220206113 | 0.32073  |
| 1229.48 | 1165.5  | 0.754821 | 0.431369636  | 0.720435 |
| 590.5   | 376     | 0.537085 | -0.794282261 | 0.927615 |
| 2662    | 1821.01 | 0.884066 | 0.226550218  | 0.681139 |
| 1847.5  | 798.5   | 0.537817 | -0.870505043 | 0.871737 |
| 1460.5  | 1500    | 0.921502 | -0.177973358 | 0.903335 |
| 369.998 | 792.009 | 0.798329 | -0.862488678 | 0.396672 |
| 2422.5  | 2636.99 | 0.840483 | -0.443404182 | 0.788831 |
| 2309    | 2430    | 0.795347 | -0.445557389 | 0.756803 |
| 1       | 4       | 0.779482 | #NUM!        | 0.308068 |
| 1.5     | 2       | 0.663808 | -1.584962501 | 0.523243 |
| 73.5    | 154.5   | 0.859517 | -0.599759503 | 0.473797 |
| 506.264 | 427.94  | 0.733326 | -0.367219299 | 0.914619 |
| 567     | 578     | 0.827036 | -0.346305025 | 0.811753 |
| 1253    | 1105    | 0.88808  | -0.178731193 | 0.998459 |
| 7249    | 6910    | 0.948234 | -0.101719436 | 0.983777 |
| 11.5    | 6.00957 | 0.599054 | -1.200756969 | 0.933387 |
| 2063.5  | 3505.5  | 0.989835 | -0.028953736 | 0.651316 |
| 1737    | 1824.5  | 0.73951  | -0.487421567 | 0.696989 |
| 956.5   | 1234.5  | 0.785884 | -0.474308314 | 0.587898 |
| 14      | 16      | 0.962079 | 0.099535674  | 0.962078 |
| 490.5   | 581     | 0.860443 | -0.340056826 | 0.743005 |
| 2075.5  | 2604    | 0.868923 | -0.327935886 | 0.712963 |
| 326     | 311     | 0.744574 | -0.503238103 | 0.782787 |
| 176.5   | 210     | 0.581435 | -0.963678486 | 0.454896 |
| 25.5    | 53.5    | 0.610297 | -1.350497247 | 0.209715 |
| 58.5    | 72      | 0.598378 | -0.548436625 | 0.384612 |
| 61.5    | 36.5    | 0.336064 | -2.942514505 | 0.585674 |
| 24      | 24.5    | 0.320682 | -4.584962501 | 0.31202  |
| 844.997 | 754.005 | 0.751061 | -0.339098117 | 0.8766   |
| 3264.04 | 3680    | 0.913595 | -0.225855937 | 0.838862 |
| 529.5   | 605.499 | 0.933752 | -0.171969927 | 0.850261 |
| 1436    | 1251.41 | 0.691287 | -0.589235623 | 0.804798 |
| 872.5   | 851.5   | 0.844923 | -0.270162115 | 0.866432 |
| 1461    | 1792.01 | 0.911302 | -0.225028083 | 0.776187 |
| 683     | 823.011 | 0.945945 | -0.144281075 | 0.831318 |
| 1321    | 1168.5  | 0.601654 | -0.56894295  | 0.732212 |
| 2205    | 2369.5  | 0.963903 | -0.08627744  | 0.917698 |
| 9881.5  | 9232.99 | 0.7614   | -0.485879497 | 0.814379 |
| 3147.64 | 2886.76 | 0.859819 | -0.309748798 | 0.919511 |
| 7213.37 | 7035.99 | 0.870677 | -0.264547621 | 0.88945  |
| 2654.48 | 2282.95 | 0.703419 | -0.489302796 | 0.843481 |
| 3096.45 | 3185.86 | 0.807974 | -0.40623524  | 0.786191 |
| 539.5   | 560     | 0.775572 | -0.451597659 | 0.745445 |
| 0.5     | 0       | 0.308068 | #NUM!        | 1        |
| 3037.54 | 3415.03 | 0.922923 | -0.169676859 | 0.837976 |
| 784.5   | 698.5   | 0.733446 | -0.58634241  | 0.817979 |
| 568     | 509     | 0.528035 | -0.798807938 | 0.628062 |
| 1633    | 1522.5  | 0.504138 | -0.618704758 | 0.584948 |
| 1258    | 1341    | 0.776446 | -0.476737244 | 0.726977 |
| 566.004 | 955.005 | 0.89154  | -0.327691213 | 0.562168 |
| 1148.5  | 1053.5  | 0.761225 | -0.384995374 | 0.843389 |

|         |         |          |              |          |
|---------|---------|----------|--------------|----------|
| 1035    | 1027    | 0.760964 | -0.465630384 | 0.767358 |
| 701.5   | 689.5   | 0.846589 | -0.341859787 | 0.858815 |
| 697     | 779.496 | 0.507444 | -0.830308682 | 0.410672 |
| 2551.5  | 3126.5  | 0.498097 | -0.854116513 | 0.331291 |
| 2382    | 2345    | 0.719903 | -0.537158663 | 0.73305  |
| 1823    | 1717    | 0.914893 | -0.198649471 | 0.953266 |
| 0.5     | 0.5     | 0.450185 | #NUM!        | 0.450185 |
| 724.5   | 796.5   | 0.658765 | -1.025108449 | 0.600363 |
| 1561.5  | 1475.17 | 0.510923 | -1.050309535 | 0.553977 |
| 1706    | 1814.5  | 0.946892 | -0.129534094 | 0.907777 |
| 984.5   | 1089.5  | 0.959967 | -0.10483132  | 0.899403 |
| 3166    | 2895.5  | 0.732442 | -0.530084413 | 0.803986 |
| 16151.8 | 13582.5 | 0.895753 | -0.149753958 | 0.935875 |
| 2457.5  | 2027.5  | 0.603969 | -1.184824893 | 0.717766 |
| 296     | 248.5   | 0.699525 | -0.354584982 | 0.917899 |
| 48.5    | 78.5    | 0.957427 | -0.124179411 | 0.656067 |
| 0       | 1       | 0.450185 | #DIV/0!      | 1        |
| 1970    | 2262.5  | 0.991647 | -0.019909729 | 0.901554 |
| 2290.15 | 2096.39 | 0.688491 | -0.617343891 | 0.760032 |
| 1613    | 1508.5  | 0.462436 | -1.116371912 | 0.513347 |
| 457.5   | 601.5   | 0.91445  | -0.230297619 | 0.738816 |
| 1723    | 1911    | 0.499582 | -1.311915134 | 0.431906 |
| 1833.5  | 1642    | 0.646244 | -0.625458363 | 0.744452 |
| 994     | 1073.5  | 0.759841 | -0.615027374 | 0.708069 |
| 6902    | 5767.5  | 0.627758 | -0.743320013 | 0.77097  |
| 1815    | 2047    | 0.9555   | -0.114517065 | 0.881553 |
| 64      | 79      | 0.829792 | -0.49220536  | 0.699887 |
| 1412.5  | 1573.53 | 0.806328 | -0.4975297   | 0.734457 |
| 6       | 4.5     | 0.86856  | -0.263034406 | 0.933926 |
| 226     | 220.5   | 0.768369 | -0.48032896  | 0.787498 |
| 6750.5  | 6957    | 0.863387 | -0.262115716 | 0.838732 |
| 9510.5  | 8628.5  | 0.750593 | -0.442475451 | 0.835698 |
| 638.5   | 754     | 0.920301 | -0.177713039 | 0.798813 |
| 1       | 0       | 0.308068 | #NUM!        | 1        |
| 126.5   | 161.5   | 0.853733 | -0.331941884 | 0.669778 |
| 5.5     | 7       | 0.576458 | -1.874469118 | 0.453522 |
| 44      | 32      | 0.679302 | -0.626541604 | 0.924467 |
| 1648    | 1650    | 0.821497 | -0.428523469 | 0.820677 |
| 2071    | 2614.5  | 0.839987 | -0.401401994 | 0.678264 |
| 2185.01 | 2581.04 | 0.823463 | -0.409999647 | 0.701732 |
| 5057.94 | 4883.22 | 0.661369 | -0.431132359 | 0.703091 |
| 1664.48 | 1560.98 | 0.750784 | -0.451031272 | 0.806455 |
| 3777.5  | 3033.5  | 0.518925 | -0.594349966 | 0.781241 |
| 3441.76 | 3531.91 | 0.485888 | -0.708627362 | 0.459629 |
| 14405   | 13423.1 | 0.695415 | -0.481000879 | 0.764781 |
| 8222.45 | 7553.06 | 0.613957 | -0.639440315 | 0.693957 |
| 10.5    | 10      | 0.832215 | 0.251538767  | 0.791627 |
| 702.5   | 615.5   | 0.122285 | -1.127679488 | 0.19782  |
| 1333.2  | 1590    | 0.896442 | -0.27938462  | 0.786324 |
| 2104    | 2046.5  | 0.695196 | -0.480020008 | 0.722652 |
| 188     | 131.5   | 0.297813 | -2           | 0.50609  |
| 256.5   | 297.001 | 0.780483 | -0.491070267 | 0.669441 |
| 19.5    | 17      | 1        | 0            | 0.826179 |
| 0.5     | 1       | 0.622002 | #NUM!        | 0.353387 |
| 1408.5  | 1269    | 0.852133 | -0.331949527 | 0.922875 |
| 0.5     | 0       | 0.495025 | 1.584962501  | 0.329316 |



|         |         |           |              |            |
|---------|---------|-----------|--------------|------------|
| 661.5   | 652.5   | 0.72188   | -0.598107877 | 0.732353   |
| 464.5   | 458     | 0.922673  | -0.167791267 | 0.932489   |
| 113     | 156     | 0.92621   | 0.185445587  | 0.869709   |
| 0       | 0.5     | 1         | #DIV/0!      | 0.308068   |
| 3.5     | 2.5     | 0.345015  | -1.807354922 | 0.550362   |
| 25.5    | 43.5    | 0.912216  | -0.280107919 | 0.591394   |
| 1503    | 1632    | 0.653031  | -0.393757957 | 0.547359   |
| 525.5   | 463     | 0.770713  | -0.502271577 | 0.861512   |
| 1387.5  | 1272    | 0.856272  | -0.307058151 | 0.918206   |
| 4013.5  | 3899.5  | 0.515046  | -0.599957775 | 0.54828    |
| 372.5   | 338     | 0.659797  | -0.456288228 | 0.769639   |
| 97.5    | 105.5   | 0.704485  | -0.618645627 | 0.641748   |
| 11      | 5.5     | 0.847091  | 0.184424571  | 0.399272   |
| 3424.04 | 3255.52 | 0.594083  | -0.662319098 | 0.642131   |
| 1223.5  | 1065    | 0.380773  | -0.914723718 | 0.511769   |
| 786     | 725.5   | 0.709932  | -0.580838548 | 0.774038   |
| 83      | 94.0001 | 0.988148  | -0.026311277 | 0.901623   |
| 153     | 114     | 0.725759  | -0.314873337 | 0.915296   |
| 99      | 76.5    | 0.107606  | -0.618129365 | 0.48687    |
| 123.5   | 136     | 0.863467  | 0.327757174  | 0.917242   |
| 101     | 106     | 0.36677   | -2.166358386 | 0.341402   |
| 3       | 1       | 0.710482  | -0.263034406 | 0.308068   |
| 939.005 | 911.492 | 0.930071  | -0.165894875 | 0.948886   |
| 187.5   | 188     | 0.260655  | -0.843387653 | 0.258381   |
| 61      | 59.5    | 0.833669  | -0.330824495 | 0.85325    |
| 527.5   | 562.5   | 0.819839  | -0.459944516 | 0.77767    |
| 658.907 | 640.949 | 0.766264  | -0.465305473 | 0.788471   |
| 3426.49 | 3116.05 | 0.418159  | -0.783977545 | 0.516102   |
| 72.5    | 69.5    | 0.824298  | -0.398549376 | 0.853834   |
| 2578.5  | 2381.5  | 0.454837  | -0.699321133 | 0.542031   |
| 5.5     | 4       | 0.545049  | -0.874469118 | 0.803152   |
| 782.5   | 523     | 0.864873  | -0.247812287 | 0.851434   |
| 0       | 0.5     | 0.450185  | #DIV/0!      | 1          |
| 141.5   | 121     | 0.619009  | -0.778336029 | 0.742272   |
| 513.5   | 466     | 0.601486  | -1.018378529 | 0.666859   |
| 8184    | 6866    | 0.0827813 | -0.799224813 | 0.209099   |
| 0.5     | 0       | 0.308068  | #NUM!        | 1          |
| 1352    | 1278    | 0.0172303 | -0.987251507 | 0.0236072  |
| 256.5   | 218.5   | 0.71675   | 0.624718869  | 0.646582   |
| 350.5   | 271.5   | 0.505268  | -0.51369142  | 0.86368    |
| 0       | 1.5     | 1         | #DIV/0!      | 0.308068   |
| 4399.5  | 4290    | 0.827091  | -0.251960443 | 0.853429   |
| 531     | 518.5   | 0.912607  | -0.189930693 | 0.929208   |
| 30.5    | 30      | 0.88791   | 0.259087221  | 0.878678   |
| 243.5   | 240     | 0.994897  | -0.011898583 | 0.996174   |
| 1016.49 | 968.003 | 0.724994  | -0.4444236   | 0.772125   |
| 510     | 471.5   | 0.64333   | -0.593474001 | 0.717141   |
| 1035    | 1021    | 0.667672  | -0.784193872 | 0.677449   |
| 981     | 825.5   | 0.527001  | -0.873366561 | 0.673926   |
| 2259.99 | 2350.51 | 0.838377  | -0.327534229 | 0.807401   |
| 351.5   | 1136    | 0.271194  | -1.474387304 | 0.00911919 |
| 2830.7  | 2725.27 | 0.85891   | -0.313853507 | 0.885465   |
| 323.5   | 374.5   | 0.88161   | -0.242224879 | 0.765006   |
| 890.5   | 810     | 0.643797  | -0.646186959 | 0.726581   |
| 404.5   | 389.499 | 0.620477  | -0.705799582 | 0.653019   |
| 233     | 166.5   | 0.550525  | -0.569565396 | 0.938483   |

|         |         |          |              |          |
|---------|---------|----------|--------------|----------|
| 924.5   | 938.5   | 0.766152 | -0.417901282 | 0.752764 |
| 413     | 397     | 0.781745 | -0.416202372 | 0.81444  |
| 0       | 1.5     | 0.450185 | #DIV/0!      | 0.18169  |
| 2       | 0.5     | 0.320255 | #NUM!        | 0.785812 |
| 5041.44 | 5171.51 | 0.833094 | -0.418077889 | 0.816431 |
| 0.5     | 1       | 0.622002 | #NUM!        | 0.353387 |
| 1       | 0.5     | 0.450185 | -1           | 1        |
| 45      | 43.5    | 0.895267 | -0.206450877 | 0.921295 |
| 200     | 216.5   | 0.563984 | -0.588573754 | 0.479328 |
| 4577.5  | 4578.5  | 0.814884 | -0.355204906 | 0.814704 |
| 720.493 | 912.999 | 0.806392 | -0.642653766 | 0.672708 |
| 163.5   | 109.5   | 0.776107 | -0.325240829 | 0.855734 |
| 224.5   | 215.5   | 0.740088 | -0.548476789 | 0.771511 |
| 844     | 794     | 0.800121 | -0.334158943 | 0.856224 |
| 2203    | 2083.5  | 0.488211 | -1.221083261 | 0.527213 |
| 487.5   | 450     | 0.675867 | -0.502993654 | 0.755675 |
| 439.361 | 529.164 | 0.896378 | -0.257003197 | 0.770684 |
| 0.5     | 0       | 0.308068 | #NUM!        | 1        |
| 1       | 4       | 0.559404 | 1.584962501  | 0.764931 |
| 1507.5  | 1208.01 | 0.662877 | -0.257566845 | 0.924004 |
| 1       | 0       | 0.308068 | -1           | 0.308068 |
| 764     | 605     | 0.82484  | -0.266816046 | 0.958769 |
| 145     | 155     | 0.783115 | -0.565199246 | 0.739349 |
| 260.5   | 223     | 0.987833 | -0.022324547 | 0.898526 |
| 1543.99 | 1633.97 | 0.701512 | -0.616599725 | 0.656099 |
| 94      | 103.5   | 0.900505 | -0.269186633 | 0.842418 |
| 420     | 293     | 0.697452 | -0.452150672 | 0.961035 |
| 6       | 6.5     | 1        | 0            | 0.955734 |
| 854.5   | 758     | 0.645285 | -0.394640774 | 0.805179 |
| 1340    | 1202.5  | 0.473784 | -0.67463077  | 0.595188 |
| 1578.5  | 1428.5  | 0.567604 | -0.613810439 | 0.673849 |
| 271     | 246.5   | 0.964863 | -0.070921786 | 0.968914 |
| 15.5    | 23.5    | 0.839911 | -0.253756592 | 0.423425 |
| 1044.11 | 1038.13 | 0.569696 | -1.282666022 | 0.573237 |
| 1050.5  | 869.5   | 0.564927 | -0.574358174 | 0.77923  |
| 39.5    | 35.5    | 0.859145 | 0.204013892  | 0.768589 |
| 35.5    | 54.5    | 0.495405 | -0.690315501 | 0.159358 |
| 497.459 | 462.072 | 0.777111 | -0.395512186 | 0.841583 |
| 0       | 0       | ?        | #DIV/0!      | ?        |
| 25      | 17.5    | 0.741127 | -0.556393349 | 0.983355 |
| 572     | 550.5   | 0.598899 | -0.684137906 | 0.634126 |
| 3651.5  | 3602    | 0.865523 | -0.301430604 | 0.875063 |
| 499.5   | 448.5   | 0.566957 | -0.74759501  | 0.664439 |
| 2108.5  | 1803.5  | 0.708951 | -0.561715985 | 0.835427 |
| 79      | 119     | 0.798463 | -0.445799753 | 0.477202 |
| 701     | 782.5   | 0.757349 | -0.493268702 | 0.667681 |
| 572     | 544.5   | 0.980049 | -0.039633459 | 0.984553 |
| 858     | 792.5   | 0.918419 | -0.135655099 | 0.987783 |
| 53      | 56.5    | 0.946818 | -0.098563834 | 0.894005 |
| 3114.5  | 2925    | 0.787132 | -0.459808033 | 0.833348 |
| 476     | 583.5   | 0.827115 | -0.400962314 | 0.676951 |
| 19.5    | 21      | 0.840365 | -0.427421224 | 0.793965 |
| 1314.5  | 1232    | 0.838469 | -0.292864066 | 0.892996 |
| 3351    | 3905    | 0.929012 | -0.148849347 | 0.811712 |
| 1265    | 1070    | 0.584318 | -0.650285641 | 0.748461 |
| 153     | 151     | 0.434307 | -0.814444347 | 0.446898 |

|         |         |          |              |          |
|---------|---------|----------|--------------|----------|
| 1447    | 1504    | 0.672691 | -0.610105958 | 0.63918  |
| 98.5    | 111     | 0.923575 | 0.17884808   | 0.997054 |
| 1       | 1.5     | 0.398521 | 1.321928095  | 0.559404 |
| 423     | 430     | 0.77778  | -0.398084366 | 0.763216 |
| 3539    | 4668.5  | 0.997757 | -0.005309287 | 0.805968 |
| 717     | 729.5   | 0.724686 | -0.378612233 | 0.705343 |
| 1320    | 1523    | 0.89877  | -0.251929159 | 0.803949 |
| 468.5   | 422.5   | 0.653812 | -0.505583023 | 0.76213  |
| 329.899 | 234.332 | 0.497238 | -0.637524675 | 0.893493 |
| 143     | 138     | 0.922922 | 0.106915204  | 0.888191 |
| 2016.16 | 1858.1  | 0.575298 | -0.605606886 | 0.661908 |
| 4812    | 5358.5  | 0.88822  | -0.260697766 | 0.813197 |
| 3316    | 3743    | 0.912968 | -0.178543342 | 0.818627 |
| 312.999 | 287.5   | 0.836089 | -0.27320595  | 0.91279  |
| 370.5   | 344.5   | 0.822633 | -0.311742611 | 0.885802 |
| 137.5   | 124.5   | 0.80095  | -0.361820822 | 0.884518 |
| 1009.5  | 1216.5  | 0.95152  | -0.12611564  | 0.834495 |
| 902.002 | 764.995 | 0.727699 | -0.457235066 | 0.876892 |
| 779.5   | 738     | 0.744773 | -0.468133413 | 0.791851 |
| 66.5    | 89      | 0.936676 | -0.14839184  | 0.725934 |
| 187.5   | 204     | 0.966456 | 0.074962058  | 0.978191 |
| 400     | 400     | 0.861699 | -0.264477823 | 0.861699 |
| 234     | 277.5   | 0.44809  | -0.651196199 | 0.279706 |
| 200     | 278.5   | 0.548361 | -0.785875195 | 0.28306  |
| 79.5    | 61      | 0.620577 | -0.758294104 | 0.827951 |
| 2845.51 | 2639.97 | 0.578767 | -0.6675031   | 0.651668 |
| 818.5   | 724     | 0.835942 | -0.212292856 | 0.974084 |
| 47      | 57.5    | 0.964073 | -0.062735755 | 0.779872 |
| 606.5   | 611     | 0.90123  | -0.133228165 | 0.892998 |
| 107     | 98      | 0.941371 | 0.091423028  | 0.866784 |
| 4512.5  | 4724.5  | 0.738174 | -0.48978146  | 0.698459 |
| 11.5    | 11      | 0.762645 | -0.61667136  | 0.79117  |
| 482.5   | 462.5   | 0.822762 | -0.312614344 | 0.85978  |
| 3223    | 2911    | 0.61182  | -0.6690581   | 0.704526 |
| 675.5   | 731.5   | 0.858066 | -0.24879542  | 0.78612  |
| 116     | 126.5   | 0.896075 | 0.218834602  | 0.953341 |
| 265     | 236.5   | 0.733081 | -0.442518236 | 0.83864  |
| 374     | 298     | 0.577263 | -0.67961572  | 0.793392 |
| 344     | 333     | 0.909606 | -0.120203065 | 0.945646 |
| 0       | 0       | ?        | #DIV/0!      | ?        |
| 2476    | 3882.5  | 0.476987 | -0.803136725 | 0.155313 |
| 648.498 | 752.505 | 0.946223 | -0.126639194 | 0.844965 |
| 23      | 33.5    | 0.894277 | 0.309328058  | 0.903811 |
| 249.5   | 312     | 0.732461 | -0.719722022 | 0.582346 |
| 51      | 53.5    | 0.933536 | -0.164630702 | 0.903521 |
| 50.5    | 54      | 0.926249 | -0.134649527 | 0.869518 |
| 0.5     | 0       | 0.308068 | #NUM!        | 1        |
| 44.5    | 84.4999 | 0.812981 | 0.546634382  | 0.821859 |
| 619     | 605.5   | 0.747904 | -0.437745244 | 0.767934 |
| 2.5     | 1.5     | 0.825659 | 0.263034406  | 0.523243 |
| 94.5    | 93      | 0.472676 | -1.372417865 | 0.483175 |
| 10.6763 | 1.07408 | 0.150265 | -13.04890651 | 0.859136 |
| 694     | 734     | 0.18885  | -1.41365229  | 0.161385 |
| 63.5    | 76      | 0.990245 | 0.022542569  | 0.888391 |
| 68      | 66.5    | 0.922676 | -0.156725504 | 0.939188 |
| 53      | 75.5    | 0.679478 | -0.284976959 | 0.222243 |

|         |         |           |              |           |
|---------|---------|-----------|--------------|-----------|
| 1865    | 1890.5  | 0.711631  | -0.489920484 | 0.698947  |
| 2803    | 2521.5  | 0.866623  | -0.30142231  | 0.937305  |
| 0       | 0.5     | 1         | #DIV/0!      | 0.308068  |
| 299.001 | 227.5   | 0.353964  | -2.580150309 | 0.492379  |
| 30.5483 | 41.9118 | 0.446908  | -0.98983962  | 0.224171  |
| 37.9517 | 74.0882 | 0.606522  | -0.654060217 | 0.130079  |
| 6038    | 5471.5  | 0.456563  | -0.819230997 | 0.55197   |
| 30.5    | 57.5    | 0.508728  | -0.682809824 | 0.0873697 |
| 59      | 22      | 0.0080571 | -1.390789953 | 0.936602  |
| 2       | 1.5     | 0.873517  | 0.321928095  | 0.751907  |
| 88      | 85.5    | 0.844366  | -0.221026879 | 0.875043  |
| 127.5   | 92.5    | 0.80843   | -0.293913719 | 0.905155  |
| 16.5    | 18      | 0.824641  | -0.459431619 | 0.768466  |
| 14.5    | 11.5    | 1         | 0            | 0.754229  |
| 721     | 779.5   | 0.80847   | -0.380113283 | 0.74455   |
| 276.815 | 197.398 | 0.574863  | -0.439016974 | 0.956901  |
| 129     | 87      | 0.715745  | -0.543621705 | 0.989102  |
| 9       | 8.5     | 0.529173  | 0.473931188  | 0.47679   |
| 4.5     | 9       | 0.355752  | 1.152003093  | 0.855681  |
| 384.001 | 489.502 | 0.957234  | 0.098021306  | 0.876331  |
| 58.5    | 70      | 0.91675   | 0.1740294    | 0.955509  |
| 79      | 61      | 1         | 0            | 0.791213  |
| 1508.5  | 1426.5  | 0.84699   | -0.275810628 | 0.894248  |
| 638.502 | 628.5   | 0.811687  | -0.321370671 | 0.826075  |
| 387     | 243     | 0.775673  | 0.415037499  | 0.556597  |
| 130.5   | 137.5   | 0.857049  | -0.355480655 | 0.822761  |
| 763.5   | 639.5   | 0.671371  | -0.448490026 | 0.865947  |
| 3564.5  | 3567.5  | 0.646509  | -0.558096642 | 0.645679  |
| 1869.01 | 1820.48 | 0.707748  | -0.561996883 | 0.729785  |
| 2786.01 | 2551.94 | 0.733273  | -0.329266332 | 0.839979  |
| 10      | 16      | 0.932455  | -0.152003093 | 0.565197  |
| 193     | 171.5   | 0.730882  | -0.499699896 | 0.830123  |
| 602.5   | 565     | 0.658335  | -0.827549667 | 0.703204  |
| 0       | 0.5     | 1         | #DIV/0!      | 0.308068  |
| 22.5    | 20      | 0.772232  | -0.584962501 | 0.846313  |
| 154.5   | 180     | 0.545252  | -1.081638469 | 0.437735  |
| 1       | 1       | 0.622002  | 1            | 0.622002  |
| 53.5    | 50      | 0.994046  | 0.013420516  | 0.952412  |
| 898     | 906.5   | 0.81766   | -0.313717857 | 0.809088  |
| 652.501 | 595.001 | 0.464672  | -0.652868776 | 0.571497  |
| 157.5   | 178     | 0.825814  | -0.404390255 | 0.737474  |
| 2693.5  | 2675.5  | 0.857433  | -0.28478304  | 0.862667  |
| 265     | 224     | 0.749709  | -0.522371543 | 0.874699  |
| 169     | 165.5   | 0.844089  | -0.297591628 | 0.86112   |
| 854.5   | 788.5   | 0.433687  | -0.65678764  | 0.528247  |
| 114     | 110.5   | 0.858445  | -0.263034406 | 0.884201  |
| 2.5     | 0.5     | 0.0662756 | -2.321928095 | 1         |
| 14.5    | 9       | 0.331277  | -1.5360529   | 0.659709  |
| 1078.83 | 1019.26 | 0.740457  | -0.387384542 | 0.798979  |
| 705     | 631.5   | 0.780099  | -0.477060988 | 0.859824  |
| 151.5   | 161.5   | 0.538657  | -0.606549363 | 0.469784  |
| 2100    | 2066    | 0.569787  | -0.52343315  | 0.589352  |
| 519.5   | 597     | 0.0924857 | -1.377123749 | 0.0562183 |
| 539     | 536.502 | 0.617366  | -0.5643625   | 0.622185  |
| 608     | 620.5   | 0.969463  | 0.063820802  | 0.983339  |
| 82.5    | 74.5    | 0.696986  | 0.375144772  | 0.609267  |

|         |         |           |              |           |
|---------|---------|-----------|--------------|-----------|
| 0       | 0       | ?         | #DIV/0!      | ?         |
| 0.5     | 0       | 0.308068  | #NUM!        | 1         |
| 10.5    | 11.5    | 0.677924  | -0.584962501 | 0.597162  |
| 439.5   | 401     | 0.467603  | -0.791034668 | 0.557842  |
| 1575.99 | 1656.01 | 0.654962  | -0.566746671 | 0.607572  |
| 1359.99 | 921.496 | 0.735815  | 0.406819357  | 0.514721  |
| 348.5   | 280     | 0.369658  | -0.717094391 | 0.636171  |
| 2.5     | 1       | 0.0405193 | -2.321928095 | 0.450185  |
| 5200.34 | 5048.96 | 0.858305  | -0.290932661 | 0.8806    |
| 1092    | 993     | 0.704473  | -0.436332278 | 0.802992  |
| 1427.5  | 1495.5  | 0.855826  | -0.345490621 | 0.824325  |
| 36.5    | 38.5    | 0.852656  | -0.356934545 | 0.816741  |
| 3990.5  | 3298.5  | 0.687124  | -0.373170842 | 0.922144  |
| 843     | 709.5   | 0.304554  | -0.833692448 | 0.487336  |
| 2480.5  | 2435    | 0.801113  | -0.473898877 | 0.813757  |
| 734.5   | 822     | 0.88705   | -0.294206488 | 0.815761  |
| 1290    | 1387.5  | 0.912196  | -0.225938275 | 0.86697   |
| 591.5   | 641     | 0.915096  | -0.205419343 | 0.862235  |
| 224.5   | 170     | 0.371862  | -2.48864354  | 0.513998  |
| 974.003 | 974.5   | 0.961563  | -0.074482208 | 0.961174  |
| 236.5   | 234.5   | 0.742915  | -0.515008967 | 0.749776  |
| 562.5   | 527.5   | 0.863117  | -0.225816202 | 0.921492  |
| 864.5   | 724.5   | 0.666103  | -0.483092369 | 0.850381  |
| 1055.28 | 945.673 | 0.849822  | -0.233984429 | 0.953614  |
| 489.5   | 420     | 0.504252  | -0.66603837  | 0.672888  |
| 910.5   | 805     | 0.745447  | -0.530162647 | 0.838693  |
| 3       | 2       | 0.785812  | -0.584962501 | 1         |
| 1015.5  | 1277    | 0.811996  | -0.447846486 | 0.645191  |
| 746.5   | 685.5   | 0.720547  | -0.423760573 | 0.806869  |
| 390.999 | 429.498 | 0.830992  | -0.372611591 | 0.760837  |
| 1.5     | 0       | 0.495025  | -1.584962501 | 0.724378  |
| 196.5   | 264.5   | 0.734689  | -0.612760953 | 0.510964  |
| 2419.5  | 2696    | 0.785691  | -0.517685693 | 0.709409  |
| 161.282 | 147.775 | 0.93273   | -0.123666612 | 0.998688  |
| 96      | 68      | 0.463818  | -0.941106311 | 0.764684  |
| 1.5     | 3       | 0.567924  | 1            | 1         |
| 490     | 490.5   | 0.907689  | 0.191356382  | 0.908349  |
| 22.5    | 18      | 0.265989  | -1.584962501 | 0.410228  |
| 540     | 497.5   | 0.791819  | -0.33198176  | 0.870081  |
| 8.5     | 10      | 0.90763   | 0.234465254  | 1         |
| 729     | 648     | 0.784522  | -0.311329963 | 0.906393  |
| 32      | 31      | 0.847026  | -0.327574658 | 0.870204  |
| 41.835  | 51.9241 | 0.81197   | -0.183852541 | 0.490838  |
| 1.5     | 3.5     | 0.573338  | 1            | 0.847091  |
| 628.499 | 645.495 | 0.837685  | -0.396412737 | 0.81988   |
| 252.5   | 587.5   | 0.598221  | -0.587822155 | 0.0616894 |
| 0.5     | 0       | 1         | 0            | 0.450185  |
| 239.5   | 113.5   | 0.82721   | -0.31516721  | 0.715907  |
| 64.5    | 48.5    | 0.923794  | 0.107713817  | 0.692017  |
| 102.5   | 120.5   | 0.994133  | -0.014144182 | 0.889094  |
| 0.5     | 2       | 0.663808  | 1.584962501  | 0.825659  |
| 946.5   | 870     | 0.789043  | -0.446627812 | 0.851673  |
| 16.5    | 11      | 0.689561  | -0.520832163 | 0.967653  |
| 35      | 55.5    | 0.843419  | -0.321928095 | 0.459987  |
| 18      | 28.5    | 0.981587  | 0.039528364  | 0.650794  |
| 2000.5  | 1668    | 0.22585   | -0.836861896 | 0.413949  |

|         |         |           |              |           |
|---------|---------|-----------|--------------|-----------|
| 9.5     | 9.5     | 0.451737  | -1.925999419 | 0.451737  |
| 620.435 | 574.346 | 0.865778  | -0.243795862 | 0.929525  |
| 440.5   | 369     | 0.501326  | -0.690241068 | 0.691713  |
| 385     | 454.5   | 0.327937  | -0.69086918  | 0.18412   |
| 101     | 124.5   | 0.875365  | -0.336283388 | 0.741619  |
| 141.5   | 150.5   | 0.609331  | -1.02571717  | 0.567801  |
| 264.5   | 265     | 0.971215  | 0.053538427  | 0.972653  |
| 2803    | 2711    | 0.692153  | -0.492754097 | 0.724745  |
| 411     | 420     | 0.836017  | -0.325442579 | 0.818695  |
| 2442.5  | 2592    | 0.529823  | -0.663088073 | 0.469375  |
| 1381.99 | 1607.51 | 0.782768  | -0.471808362 | 0.66546   |
| 780.004 | 852.502 | 0.729384  | -0.480643563 | 0.648702  |
| 599.5   | 536.5   | 0.780444  | -0.413834752 | 0.87125   |
| 27      | 33      | 0.916884  | -0.169925001 | 0.756155  |
| 49      | 54.5    | 0.925242  | 0.179706022  | 0.988473  |
| 479     | 454.5   | 0.769149  | -0.648853276 | 0.80059   |
| 386     | 468.5   | 0.84909   | -0.243728883 | 0.656344  |
| 0       | 0       | ?         | #DIV/0!      | ?         |
| 963     | 888.5   | 0.985441  | -0.024171372 | 0.946823  |
| 446.5   | 460     | 0.869472  | -0.236462327 | 0.843848  |
| 475     | 467.997 | 0.797437  | -0.414025437 | 0.809035  |
| 751.5   | 676     | 0.598896  | -0.450341486 | 0.738254  |
| 450     | 478.5   | 0.924674  | -0.166322765 | 0.881278  |
| 1056    | 992.5   | 0.929591  | -0.091651416 | 0.998373  |
| 45      | 34.5    | 0.710649  | 0.519374159  | 0.574739  |
| 293.5   | 329     | 0.989503  | -0.022291011 | 0.907024  |
| 298.5   | 317.5   | 0.941804  | -0.118299313 | 0.895083  |
| 86.5    | 105     | 0.996568  | -0.008363473 | 0.870495  |
| 1722    | 1850    | 0.485097  | -1.322556583 | 0.437848  |
| 320.5   | 449.5   | 0.882918  | -0.324180547 | 0.663713  |
| 103.5   | 101.5   | 0.90918   | -0.201633861 | 0.922563  |
| 1       | 1.5     | 1         | 0            | 0.785812  |
| 1224.5  | 1083.5  | 0.106534  | -0.834861148 | 0.190485  |
| 2025.7  | 2064.84 | 0.906883  | -0.180880897 | 0.891752  |
| 2773.5  | 4382    | 0.801463  | -0.739221432 | 0.549844  |
| 3.5     | 5       | 0.933926  | -0.222392421 | 0.742577  |
| 155     | 173     | 0.846045  | -0.405759686 | 0.775678  |
| 2548    | 2625.5  | 0.596837  | -0.559844674 | 0.564569  |
| 1011.5  | 1070    | 0.907159  | -0.214094625 | 0.868697  |
| 268.5   | 234     | 0.768484  | -0.36833856  | 0.89866   |
| 299.5   | 333.5   | 0.960447  | -0.079207268 | 0.87709   |
| 455     | 436     | 0.786146  | -0.312053347 | 0.830829  |
| 87      | 79      | 0.937614  | 0.103952507  | 0.861711  |
| 3       | 4       | 1         | 0            | 0.847091  |
| 9       | 12.5    | 1         | 0            | 0.806223  |
| 1112.5  | 990.5   | 0.572425  | -0.566920523 | 0.70372   |
| 2792    | 2668    | 0.355558  | -0.750550312 | 0.403439  |
| 603.5   | 526.5   | 0.813626  | -0.245688115 | 0.964999  |
| 2379.5  | 2050.5  | 0.683085  | -0.447844857 | 0.842153  |
| 441.5   | 425.5   | 0.883232  | -0.298429594 | 0.905692  |
| 130.5   | 100     | 0.721703  | 0.491730256  | 0.581187  |
| 45      | 35      | 0.801136  | -0.282399731 | 0.949506  |
| 134     | 153     | 0.964723  | 0.088728919  | 0.956434  |
| 14      | 14.5    | 0.443287  | -1.637429921 | 0.422237  |
| 5888.5  | 5832    | 0.0790395 | -0.840909283 | 0.0830303 |
| 892     | 907.496 | 0.664178  | -1.109156381 | 0.654371  |

|         |         |          |              |          |
|---------|---------|----------|--------------|----------|
| 1201.49 | 1105    | 0.649895 | -0.654126468 | 0.721392 |
| 419.5   | 444.5   | 0.809976 | -0.368231093 | 0.761827 |
| 4107    | 3190    | 0.345312 | -0.818993889 | 0.625887 |
| 980.5   | 932.5   | 0.747836 | -0.448529474 | 0.792205 |
| 900.5   | 991.5   | 0.914726 | -0.202635524 | 0.849922 |
| 670.5   | 669.5   | 0.831416 | -0.42909159  | 0.832371 |
| 528.5   | 585.5   | 0.881487 | -0.238404739 | 0.799784 |
| 1056    | 1107.5  | 0.904016 | -0.228210438 | 0.872398 |
| 1619    | 1590.5  | 0.818771 | -0.234098376 | 0.839588 |
| 339.5   | 345     | 0.841051 | -0.298743307 | 0.827608 |
| 4264.54 | 3743.05 | 0.638241 | -0.509819678 | 0.778839 |
| 2197.5  | 2311    | 0.667495 | -0.551381643 | 0.61956  |
| 0.5     | 1       | 0.622002 | #NUM!        | 0.353387 |
| 300     | 375.5   | 0.985374 | -0.038994132 | 0.848776 |
| 140.5   | 170.5   | 0.926301 | 0.209869588  | 0.973148 |
| 59.5    | 46.5    | 0.983947 | 0.024045474  | 0.779777 |
| 1544    | 1338.5  | 0.444753 | -0.889418648 | 0.576977 |
| 1324    | 1251    | 0.683275 | -0.505727492 | 0.738621 |
| 556     | 653.5   | 0.917505 | -0.197100136 | 0.806715 |
| 550     | 579.999 | 0.994232 | 0.01175324   | 0.967331 |
| 1997    | 1660    | 0.547261 | -0.588579186 | 0.759219 |
| 6390.5  | 5464.67 | 0.735065 | -0.438074505 | 0.878781 |
| 781.5   | 745.5   | 0.691211 | -0.692729984 | 0.726038 |
| 522     | 417.5   | 0.656378 | -0.552172566 | 0.866947 |
| 140     | 132     | 0.933229 | -0.123658468 | 0.979645 |
| 1       | 3       | 0.724378 | #NUM!        | 0.329316 |
| 135.5   | 165.5   | 0.982955 | -0.037754922 | 0.838597 |
| 731.5   | 779     | 0.955989 | 0.09907541   | 0.996188 |
| 1134.5  | 1343    | 0.930941 | -0.160605309 | 0.812853 |
| 964.5   | 912.5   | 0.755534 | -0.521320005 | 0.797365 |
| 422     | 336.5   | 0.699843 | -0.492280498 | 0.906986 |
| 1249.5  | 1218.5  | 0.652019 | -0.598010781 | 0.675141 |
| 619.5   | 680     | 0.817788 | -0.383176769 | 0.745022 |
| 1185.5  | 1062    | 0.747425 | -0.459735888 | 0.84124  |
| 2425    | 2599.5  | 0.806701 | -0.423191149 | 0.754429 |
| 1314.5  | 1413.5  | 0.764681 | -0.436228241 | 0.701262 |
| 0       | 0       | ?        | #DIV/0!      | ?        |
| 889.5   | 764     | 0.207445 | -0.788422173 | 0.364892 |
| 218     | 169     | 0.819096 | -0.217437539 | 0.889323 |
| 406     | 434     | 0.878318 | 0.272773409  | 0.918363 |
| 2       | 4.5     | 0.918711 | 0.321928095  | 0.687418 |
| 20      | 20      | 0.98083  | -0.036525876 | 0.98083  |
| 18      | 17.5    | 0.640392 | -1           | 0.658371 |
| 3       | 12      | 0.904922 | 0.222392421  | 0.114423 |
| 2076    | 2203.5  | 0.708486 | -0.409488665 | 0.643032 |
| 12      | 14      | 0.877103 | 0.273018494  | 0.975273 |
| 584.5   | 545.5   | 0.834238 | -0.361336479 | 0.883482 |
| 191.5   | 176.5   | 0.850692 | -0.241350579 | 0.926095 |
| 107.5   | 85      | 0.609779 | -0.519374159 | 0.872395 |
| 310.5   | 267     | 0.796139 | -0.309782665 | 0.943028 |
| 0       | 0       | ?        | #DIV/0!      | ?        |
| 228.5   | 222.5   | 0.908636 | -0.199425735 | 0.927127 |
| 0       | 0       | ?        | #DIV/0!      | ?        |
| 133.5   | 136     | 0.910068 | -0.196509787 | 0.896951 |
| 0.5     | 1       | 0.622002 | #NUM!        | 0.353387 |
| 0.5     | 0       | 1        | 0            | 0.450185 |

|         |         |          |              |           |
|---------|---------|----------|--------------|-----------|
| 44.5    | 51.5    | 0.976256 | -0.049468676 | 0.866413  |
| 260.313 | 215.895 | 0.478744 | -0.623685168 | 0.706268  |
| 141     | 137.5   | 0.681747 | -0.663817921 | 0.701527  |
| 49      | 58      | 0.973166 | 0.071790683  | 0.93035   |
| 647.784 | 635.628 | 0.802477 | -0.394815076 | 0.817515  |
| 777.5   | 729     | 0.544554 | -0.583108137 | 0.618509  |
| 1       | 0.5     | 1        | 0            | 0.622002  |
| 5       | 9.5     | 0.742971 | 0.584962501  | 0.792322  |
| 206     | 249     | 0.692367 | -0.726498595 | 0.553107  |
| 890.5   | 1014    | 0.852739 | -0.309627455 | 0.751316  |
| 875     | 830     | 0.506187 | -0.689659879 | 0.561445  |
| 1792.51 | 2006.01 | 0.94456  | -0.139758049 | 0.873712  |
| 24      | 18      | 0.628531 | -1           | 0.805715  |
| 87.5    | 72.5    | 0.753517 | 0.449655696  | 0.648126  |
| 0       | 1       | 0.450185 | #DIV/0!      | 1         |
| 24      | 26.5    | 0.864021 | 0.273018494  | 0.931619  |
| 2573.5  | 2445.5  | 0.750916 | -0.426010757 | 0.797535  |
| 77      | 70.5    | 0.987902 | 0.018615678  | 0.909564  |
| 48.5    | 46      | 0.536209 | -0.450165723 | 0.613015  |
| 903     | 1005    | 0.957227 | -0.086414752 | 0.874846  |
| 325.5   | 318.5   | 0.943509 | 0.114965714  | 0.928918  |
| 279     | 222.5   | 0.606321 | -0.558067274 | 0.846011  |
| 650     | 656     | 0.860664 | -0.280900827 | 0.85352   |
| 320.148 | 360.36  | 0.937242 | 0.128834373  | 0.978339  |
| 98.5    | 88      | 0.829899 | -0.204199305 | 0.966906  |
| 392     | 403.5   | 0.800005 | -0.495768771 | 0.780597  |
| 980     | 1144    | 0.912942 | -0.222392421 | 0.813118  |
| 0       | 0       | ?        | #DIV/0!      | ?         |
| 2473.5  | 2900    | 0.823797 | -0.429202273 | 0.712275  |
| 266     | 284     | 0.88587  | -0.25762091  | 0.839503  |
| 107.859 | 123.024 | 0.966635 | -0.077412613 | 0.877545  |
| 180.5   | 366.5   | 0.783413 | -0.888524713 | 0.401924  |
| 10      | 99.5    | 0.912625 | -1.321928095 | 0.153961  |
| 51      | 75.5    | 0.613818 | -1.148863386 | 0.369916  |
| 847     | 1573    | 0.566483 | -1.240388851 | 0.208662  |
| 52.5    | 73.5    | 0.50745  | -1.222392421 | 0.291825  |
| 0.5     | 1       | 0.308068 | #NUM!        | 0.0917211 |
| 325.35  | 355.47  | 0.976027 | -0.049749301 | 0.910823  |
| 17.5    | 15.5    | 0.870196 | -0.222392421 | 0.973864  |
| 25      | 19.5    | 0.567391 | -0.888968688 | 0.760232  |
| 226     | 388.5   | 0.849263 | 0.339692374  | 0.74701   |
| 1693.5  | 1629.5  | 0.54736  | 0.691532846  | 0.524735  |
| 1101.5  | 1218    | 0.869519 | -0.305972158 | 0.799288  |
| 208     | 243     | 0.598049 | -1.169058258 | 0.499548  |
| 3259    | 3618    | 0.933371 | -0.168625214 | 0.867558  |
| 253     | 310     | 0.85819  | -0.360941755 | 0.720893  |
| 333.5   | 357.5   | 0.575395 | -1.247116631 | 0.531911  |
| 267.5   | 319.5   | 0.341326 | -1.441343262 | 0.236601  |
| 23.5    | 24.5    | 0.9652   | 0.089267338  | 0.988395  |
| 10406   | 8964.5  | 0.755004 | -0.600504353 | 0.852288  |
| 1933.51 | 4791.04 | 0.888823 | 0.412498345  | 0.634836  |
| 594.499 | 708.497 | 0.690066 | -1.078544586 | 0.591095  |
| 3960.99 | 3753.97 | 0.648147 | -1.099482602 | 0.679529  |
| 2531.13 | 2148.65 | 0.949344 | -0.117817936 | 0.953036  |
| 1641.42 | 1774.32 | 0.794283 | -0.570597809 | 0.745763  |
| 123     | 56.5    | 0.343496 | 2.464032794  | 0.297874  |



|         |         |          |              |           |
|---------|---------|----------|--------------|-----------|
| 305.001 | 345.999 | 0.847367 | -0.426121675 | 0.770062  |
| 474.504 | 315.5   | 0.513108 | -1.443193213 | 0.751062  |
| 85      | 42      | 0.721773 | -0.551409941 | 0.831585  |
| 381     | 319     | 0.75246  | -0.616550952 | 0.865832  |
| 179     | 152     | 0.754107 | -0.644611989 | 0.854615  |
| 0       | 0.5     | 0.450185 | #DIV/0!      | 1         |
| 326.5   | 249.5   | 0.48595  | -1.788696757 | 0.633152  |
| 84      | 111.5   | 0.344582 | -1.584962501 | 0.193743  |
| 320.999 | 227.001 | 0.381251 | -2.558240668 | 0.554872  |
| 615.5   | 469.5   | 0.46887  | -1.115867927 | 0.675025  |
| 1115    | 1016.5  | 0.775396 | -0.404295119 | 0.85478   |
| 376.5   | 411     | 0.844221 | -0.347052689 | 0.779744  |
| 9207    | 8572.5  | 0.617627 | -0.908330954 | 0.668445  |
| 513     | 423.999 | 0.840113 | -0.369819818 | 0.962411  |
| 2071    | 1995    | 0.107427 | -1.546470021 | 0.120928  |
| 3206.62 | 2441.49 | 0.456794 | -1.733197263 | 0.613793  |
| 888.502 | 956.003 | 0.721511 | -0.701153528 | 0.671116  |
| 120     | 43      | 0.287019 | -1.074000581 | 0.792785  |
| 145     | 1104    | 0.883322 | -0.493408563 | 0.0319117 |
| 1074    | 1522.5  | 0.958191 | -0.069482891 | 0.613116  |
| 577     | 635.5   | 0.94931  | 0.102532963  | 0.9809    |
| 4       | 8       | 1        | 0            | 0.499897  |
| 583     | 669.5   | 0.916843 | -0.204358499 | 0.825166  |
| 1051    | 1537.99 | 0.811132 | 0.405375813  | 0.918137  |
| 1       | 1       | 0.450185 | #NUM!        | 0.450185  |
| 40.5    | 45      | 0.896618 | -0.273760812 | 0.831416  |
| 1       | 1       | 0.234161 | 1.807354922  | 0.234161  |
| 22911.5 | 21918.8 | 0.329079 | -0.921029098 | 0.368558  |
| 18775   | 15865.6 | 0.422211 | -1.031117337 | 0.564376  |
| 0       | 2       | 0.450185 | #DIV/0!      | 0.450185  |
| 1532    | 1471.5  | 0.213191 | -0.740422658 | 0.25052   |
| 108.5   | 136.5   | 0.79093  | -0.552097867 | 0.636047  |
| 13.5    | 15      | 0.813487 | -0.432959407 | 0.737458  |
| 400.5   | 677     | 0.627227 | -1.52671736  | 0.348258  |
| 48.5    | 58      | 0.92207  | -0.140481224 | 0.762661  |
| 115     | 107     | 0.438819 | -2.523561956 | 0.474524  |
| 1960    | 2118.98 | 0.941002 | 0.126736917  | 0.993108  |
| 1092.5  | 997.491 | 0.798465 | -0.454078665 | 0.862119  |
| 1084.78 | 652.058 | 0.452971 | -1.213583673 | 0.813856  |
| 232     | 326     | 0.843238 | -0.415037499 | 0.611801  |
| 2803.5  | 2916    | 0.735732 | -0.706499033 | 0.71017   |
| 192     | 191     | 0.81656  | -0.351342824 | 0.820862  |
| 1357.49 | 1345.48 | 0.675907 | -0.673512198 | 0.682946  |
| 11      | 19      | 0.515234 | -2.137503524 | 0.248582  |
| 2566.5  | 2613    | 0.763312 | -0.624280083 | 0.751712  |
| 1694    | 1946    | 0.83655  | -0.474144117 | 0.753379  |
| 3331    | 2961    | 0.716016 | -0.758125937 | 0.789866  |
| 5794    | 6081.5  | 0.805183 | -0.431733612 | 0.769324  |
| 818.51  | 903.495 | 0.871216 | -0.31929763  | 0.805613  |
| 512.5   | 454     | 0.772011 | -0.383022692 | 0.881728  |
| 6402.27 | 6001.6  | 0.833577 | -0.336355921 | 0.882973  |
| 357     | 345     | 0.644313 | -0.898579682 | 0.667641  |
| 5348.5  | 5629    | 0.721386 | -0.56653617  | 0.679981  |
| 1238.51 | 1351.01 | 0.632134 | -0.98553526  | 0.574208  |
| 18.5    | 25.5    | 0.782623 | -0.624490865 | 0.575421  |
| 0.5     | 0       | 1        | 0            | 0.450185  |

|         |         |          |              |          |
|---------|---------|----------|--------------|----------|
| 554.997 | 725.5   | 0.62428  | -0.938916625 | 0.437504 |
| 7.5     | 8       | 0.344593 | -1.321928095 | 0.30199  |
| 765     | 900     | 0.965835 | -0.07947005  | 0.854552 |
| 150.5   | 149.5   | 0.929742 | -0.140862536 | 0.934743 |
| 843.5   | 714.5   | 0.911636 | 0.174573505  | 0.808895 |
| 7.5     | 4.5     | 0.777386 | -0.447458977 | 0.886945 |
| 11.5    | 15      | 0.618725 | -1.064130337 | 0.445615 |
| 20181.4 | 21538.9 | 0.800119 | -0.440815666 | 0.751409 |
| 751     | 793.5   | 0.87907  | -0.271898327 | 0.839967 |
| 113     | 141.5   | 0.790504 | 0.451284065  | 0.933277 |
| 9       | 3.5     | 0.570506 | 1            | 0.38153  |
| 4060.01 | 4245.92 | 0.715176 | -0.49840816  | 0.674225 |
| 4169.99 | 4040.5  | 0.708763 | -0.364936483 | 0.746913 |
| 0       | 0       | ?        | #DIV/0!      | ?        |
| 5758.82 | 6160.77 | 0.549205 | -0.614791187 | 0.47809  |
| 335     | 277     | 0.801726 | 0.363526774  | 0.689794 |
| 71      | 133.5   | 0.815669 | -0.626185163 | 0.43894  |
| 28.5    | 36      | 0.904168 | 0.189477799  | 0.916072 |
| 237.5   | 221.5   | 0.83939  | -0.360402243 | 0.887719 |
| 738     | 632.5   | 0.771286 | -0.308308486 | 0.939989 |
| 1529    | 1626    | 0.948198 | -0.104666942 | 0.901523 |
| 1551.48 | 1540.49 | 0.825771 | -0.361609963 | 0.831208 |
| 1024    | 985     | 0.783167 | -0.378863887 | 0.817849 |
| 83      | 89.5    | 0.855447 | 0.318447526  | 0.900824 |
| 4734.5  | 4179    | 0.604946 | -0.669837547 | 0.719857 |
| 4063    | 4320    | 0.818648 | -0.363077427 | 0.769121 |
| 844.5   | 862.5   | 0.792752 | -0.481169435 | 0.777779 |
| 3813    | 4127.5  | 0.93141  | -0.165391785 | 0.879667 |
| 3038    | 2113    | 0.710164 | -0.675983931 | 0.944157 |
| 1169.55 | 1207.53 | 0.940104 | -0.137866232 | 0.91886  |
| 883.998 | 769.001 | 0.814523 | -0.290039477 | 0.946304 |
| 2.5     | 8       | 0.68405  | 1.263034406  | 0.814202 |
| 881.004 | 946     | 0.886091 | -0.227456988 | 0.829627 |
| 3616.5  | 3034.5  | 0.488765 | -1.089908299 | 0.621786 |
| 608.5   | 749     | 0.910414 | -0.17497199  | 0.736325 |
| 43.5    | 47      | 0.947948 | -0.103093493 | 0.887682 |
| 478.5   | 452     | 0.877805 | -0.196742727 | 0.930599 |
| 820.851 | 751.378 | 0.788626 | -0.354726858 | 0.869177 |
| 7.5     | 15.5    | 0.671203 | -1.906890596 | 0.333294 |
| 17      | 28.9552 | 0.532823 | 1.45169597   | 0.704087 |
| 490     | 611.5   | 0.481295 | -1.655867169 | 0.354286 |
| 436     | 467.501 | 0.878719 | -0.276335236 | 0.829483 |
| 4201.49 | 4025.98 | 0.9      | -0.200449525 | 0.93205  |
| 123     | 187     | 0.981877 | 0.034765418  | 0.650603 |
| 1.5     | 5.5     | 0.907467 | -0.584962501 | 0.338171 |
| 1297.5  | 1293.5  | 0.747014 | -0.491338238 | 0.749575 |
| 1130.01 | 841.001 | 0.488904 | -1.760572547 | 0.650686 |
| 1106    | 1100.49 | 0.709297 | -0.57197492  | 0.713415 |
| 1083.5  | 1136    | 0.787685 | -0.57666445  | 0.757884 |
| 555.5   | 688.5   | 0.957911 | -0.107814484 | 0.820275 |
| 2229    | 2145.5  | 0.740548 | -0.502877946 | 0.772053 |
| 471.325 | 295.699 | 0.312227 | -1.549661518 | 0.635218 |
| 3801.68 | 1710.8  | 0.984236 | -0.024756537 | 0.549767 |
| 2471.48 | 2128    | 0.805775 | -0.252959338 | 0.973202 |
| 313.5   | 289     | 0.945695 | -0.09510494  | 0.987767 |
| 1005.5  | 1041    | 0.793137 | -0.475845529 | 0.768236 |

|         |         |          |              |           |
|---------|---------|----------|--------------|-----------|
| 701.497 | 671.999 | 0.711867 | -0.494282501 | 0.751319  |
| 5916.46 | 4495.91 | 0.558922 | -0.598244693 | 0.860117  |
| 7557.56 | 7511.66 | 0.792578 | -0.368655516 | 0.797973  |
| 256     | 297.5   | 0.566611 | -0.886257834 | 0.448962  |
| 127.5   | 103.5   | 1        | 0            | 0.883711  |
| 298     | 287     | 0.690358 | -0.619255678 | 0.720871  |
| 2073.5  | 2229.5  | 0.569626 | -0.449896256 | 0.474564  |
| 1396    | 1509.5  | 0.879147 | -0.287842576 | 0.825974  |
| 1901.47 | 2007.49 | 0.942373 | -0.128450792 | 0.904881  |
| 4510    | 4582.73 | 0.798721 | -0.447203089 | 0.786987  |
| 11.5    | 14      | 0.900145 | -0.275634443 | 0.77899   |
| 605     | 675     | 0.873826 | -0.249269486 | 0.784622  |
| 673.5   | 666     | 0.951861 | -0.096326117 | 0.960149  |
| 22.5    | 24      | 0.890273 | 0.236067358  | 0.931213  |
| 3341.54 | 3426.4  | 0.573141 | -0.659507639 | 0.548538  |
| 501     | 455.5   | 0.838814 | -0.242448634 | 0.932847  |
| 4.5     | 7.5     | 1        | 0            | 0.669515  |
| 34.5    | 37.5    | 0.377846 | -0.493814613 | 0.272114  |
| 943.5   | 803     | 0.657762 | -0.559950613 | 0.809483  |
| 397.5   | 447     | 0.565106 | -0.544698631 | 0.434539  |
| 5.5     | 5.5     | 0.493436 | -0.874469118 | 0.493436  |
| 351     | 564     | 0.63438  | -0.651196199 | 0.253681  |
| 241.765 | 274.017 | 0.989137 | -0.024621312 | 0.903863  |
| 84.9999 | 76.0001 | 0.839933 | 0.255946678  | 0.756185  |
| 90      | 69.5    | 1        | 0            | 0.836379  |
| 290.5   | 263.5   | 0.713063 | -0.635499894 | 0.784554  |
| 2610    | 2324    | 0.47121  | -0.66289592  | 0.604002  |
| 0       | 1       | 0.353387 | #DIV/0!      | 0.622002  |
| 2       | 1       | 0.308068 | -2           | 0.710482  |
| 2033.5  | 1876    | 0.58054  | -0.734720706 | 0.652858  |
| 73      | 69      | 0.952202 | 0.076961982  | 0.904673  |
| 273.5   | 311     | 0.85966  | -0.317319893 | 0.765742  |
| 1022    | 1084.5  | 0.894811 | -0.238956266 | 0.85331   |
| 235.5   | 240.5   | 0.941279 | -0.128039191 | 0.926657  |
| 1390.98 | 1404.49 | 0.838332 | -0.347161649 | 0.831157  |
| 927     | 974     | 0.727106 | -0.455546092 | 0.68004   |
| 111     | 73      | 0.948565 | -0.080170349 | 0.733557  |
| 375.5   | 384     | 0.475829 | -0.624891135 | 0.450587  |
| 532     | 587     | 0.872433 | -0.278849403 | 0.799435  |
| 34.5    | 30      | 0.948095 | 0.100928909  | 0.855757  |
| 54.5    | 45.5    | 0.86322  | 0.287098111  | 0.764362  |
| 89.5    | 68.5    | 0.939964 | -0.117493563 | 0.880458  |
| 229.5   | 251     | 0.901357 | -0.242437501 | 0.842608  |
| 0       | 0.5     | 0.353387 | #DIV/0!      | 0.622002  |
| 3       | 0       | 0        | #NUM!        | ?         |
| 124     | 93.5    | 0.854591 | -0.246837178 | 0.917483  |
| 213.5   | 158.5   | 0.82852  | 0.30082673   | 0.652362  |
| 5194.22 | 2232.98 | 0.844701 | -0.319248907 | 0.716306  |
| 819     | 746     | 0.752686 | -0.32788555  | 0.85865   |
| 196     | 158.5   | 0.997662 | 0.003675658  | 0.824607  |
| 320     | 345.999 | 0.965761 | -0.076375389 | 0.912052  |
| 474.5   | 417.5   | 0.643175 | -0.445249431 | 0.796926  |
| 269     | 202.5   | 0.923561 | -0.126018526 | 0.851526  |
| 838     | 813     | 0.748592 | -0.513589741 | 0.772502  |
| 248.5   | 193.5   | 0.317406 | -0.671699823 | 0.660819  |
| 15      | 42.5    | 0.492225 | -1.906890596 | 0.0719204 |

|         |         |          |              |           |
|---------|---------|----------|--------------|-----------|
| 724.5   | 607     | 0.959389 | -0.079829024 | 0.918427  |
| 316.5   | 241.501 | 0.844053 | -0.253493639 | 0.926036  |
| 2       | 1.5     | 0.523243 | -2           | 0.663808  |
| 6.5     | 2.5     | 0.564576 | -0.700439718 | 0.724378  |
| 18.5    | 13.5    | 0.88758  | 0.249978253  | 0.73371   |
| 249     | 210     | 0.990457 | -0.017487427 | 0.886093  |
| 446     | 404.5   | 0.843407 | -0.307044451 | 0.918809  |
| 0       | 0       | ?        | #DIV/0!      | ?         |
| 1474.5  | 1371.5  | 0.680164 | -0.528124979 | 0.748695  |
| 1318    | 1297.5  | 0.879472 | -0.2226661   | 0.892447  |
| 195     | 201     | 0.791801 | -0.509298231 | 0.771155  |
| 2898.5  | 2360.56 | 0.615826 | -0.991810602 | 0.749711  |
| 431     | 396     | 0.709981 | -0.529956938 | 0.783093  |
| 441     | 456     | 0.802389 | -0.356274673 | 0.772898  |
| 2772    | 3507    | 0.237482 | -0.77671565  | 0.0950949 |
| 58      | 59      | 0.975991 | -0.050626073 | 0.963997  |
| 343.5   | 256     | 0.549963 | -0.642806575 | 0.857313  |
| 409.5   | 429     | 0.598417 | -0.558778569 | 0.54853   |
| 1959.5  | 2184.5  | 0.889324 | -0.269602017 | 0.816429  |
| 35.5    | 28.5    | 0.528124 | 1            | 0.45694   |
| 2908.51 | 2659.55 | 0.516485 | -0.674733551 | 0.61141   |
| 1       | 0       | 0.622002 | -1           | 0.622002  |
| 237     | 263     | 0.766658 | -0.571330635 | 0.693751  |
| 443     | 472.5   | 0.862105 | -0.321521071 | 0.817252  |
| 2       | 4.5     | 0.534406 | 1            | 0.87225   |
| 32      | 17.5    | 0.587203 | -0.540568381 | 0.802729  |
| 845     | 910     | 0.908817 | -0.244037912 | 0.864317  |
| 3943.5  | 2537.5  | 0.185646 | -1.083011026 | 0.617307  |
| 51      | 47.5    | 0.869423 | -0.314873337 | 0.914779  |
| 781.5   | 761.5   | 0.731266 | -0.441429945 | 0.756003  |
| 274.18  | 311.743 | 0.903677 | -0.208782142 | 0.80797   |
| 271.5   | 258.5   | 0.789839 | -0.37056287  | 0.833108  |
| 77.5    | 21.5    | 0.793905 | 0.308838095  | 0.333738  |
| 45.5    | 41.5    | 0.739087 | -0.625151591 | 0.801856  |
| 2866.08 | 3431.7  | 0.861419 | -0.365189254 | 0.744238  |
| 891.367 | 907.354 | 0.888348 | -0.264578976 | 0.87654   |
| 532.5   | 335     | 0.483214 | -0.643009786 | 0.981625  |
| 28      | 34      | 1        | 0            | 0.872571  |
| 231     | 218     | 0.874946 | -0.175792008 | 0.935987  |
| 272.5   | 370.001 | 0.88025  | 0.267443983  | 0.909149  |
| 853     | 675     | 0.918169 | -0.166546323 | 0.925175  |
| 1038.5  | 709     | 0.244463 | -0.830460942 | 0.717831  |
| 3476.94 | 4322.46 | 0.79878  | -0.601525886 | 0.665958  |
| 6143.34 | 7292.99 | 0.9967   | 0.008095623  | 0.894027  |
| 21.5    | 15.5    | 0.809502 | 0.456378295  | 0.676523  |
| 237.5   | 248     | 0.680543 | -0.658164026 | 0.645827  |
| 673.5   | 667     | 0.575793 | -0.659132204 | 0.585322  |
| 154.5   | 136.5   | 0.959217 | 0.068386975  | 0.862324  |
| 726.001 | 544.498 | 0.597113 | -0.764047115 | 0.832197  |
| 739     | 629.5   | 0.735018 | -0.502907112 | 0.865446  |
| 771     | 772     | 0.869595 | -0.273174436 | 0.868628  |
| 44.5    | 65      | 0.585247 | -0.668378509 | 0.26511   |
| 1       | 0       | 0.710482 | 0.584962501  | 0.308068  |
| 88.5    | 72.5    | 0.883619 | -0.219678037 | 0.967245  |
| 0       | 0       | 0.308068 | #DIV/0!      | 0.308068  |
| 1       | 2       | 0.129088 | 3            | 0.172724  |

|          |         |           |              |          |
|----------|---------|-----------|--------------|----------|
| 0.5      | 2.5     | 0.706667  | 1.584962501  | 0.706667 |
| 3        | 0.5     | 0.0469762 | -7.258480376 | 0.635184 |
| 9.46E-11 | 0       | 0.308068  | 32.2414692   | 0.308068 |
| 0.5      | 0       | 0.308068  | #NUM!        | 1        |
| 29.1057  | 34.8471 | 0.629362  | -0.35738333  | 0.38395  |
| 0        | 0.5     | 1         | #DIV/0!      | 0.308068 |
| 12.2805  | 23.0624 | 0.750505  | -0.402665389 | 0.2069   |
| 0.70313  | 2.20528 | 0.734585  | -65.81788011 | 0.327582 |
| 1249     | 1314    | 0.761335  | -0.533341012 | 0.72352  |
| 45       | 36.5    | 0.407873  | -1.243925583 | 0.564202 |
| 2058.01  | 2440    | 0.785665  | -0.517176284 | 0.663796 |
| 5087.46  | 5532.2  | 0.617798  | -0.614502669 | 0.537346 |
| 573.5    | 587.501 | 0.898478  | -0.199300143 | 0.879481 |
| 2890     | 2695.5  | 0.930534  | -0.126438809 | 0.986224 |
| 838.492  | 1025.99 | 0.894838  | 0.238902688  | 0.974478 |
| 765.5    | 852     | 0.933118  | -0.120826949 | 0.84045  |
| 1923.5   | 1962.5  | 0.703142  | -0.512913333 | 0.684642 |
| 402.5    | 442.5   | 0.912114  | -0.1893206   | 0.842231 |
| 312.5    | 379.5   | 0.862668  | -0.310432456 | 0.718055 |
| 1694.5   | 1865    | 0.814988  | -0.402463375 | 0.742134 |
| 1396.5   | 1578.5  | 0.777689  | -0.510961919 | 0.687303 |
| 1060     | 1118.5  | 0.865755  | -0.322778991 | 0.82959  |
| 1692     | 1467.5  | 0.542079  | -0.552086344 | 0.71618  |
| 11960.2  | 11557.7 | 0.678576  | -0.677984093 | 0.705248 |
| 416.302  | 459.348 | 0.868289  | -0.259588272 | 0.788076 |
| 405.5    | 421.5   | 0.825072  | -0.375845725 | 0.795938 |
| 166      | 164     | 0.808219  | 0.376504628  | 0.80072  |
| 1602     | 1611    | 0.757149  | -0.514444527 | 0.752829 |
| 1556.5   | 1513.5  | 0.789928  | -0.444849211 | 0.811119 |
| 2814.07  | 2968.94 | 0.913188  | -0.191989739 | 0.875261 |
| 1027     | 1214    | 0.940895  | -0.151690957 | 0.834716 |
| 340      | 338.5   | 0.983436  | -0.036525876 | 0.986359 |
| 1570     | 1874.5  | 0.874067  | -0.290681263 | 0.745593 |
| 1234.49  | 1320    | 0.733724  | -0.750061216 | 0.691585 |
| 1657     | 1507.3  | 0.962742  | 0.073123118  | 0.898378 |
| 5.83652  | 8.6526  | 0.408869  | -18.98486237 | 0.250749 |
| 10       | 7.5     | 0.749864  | -0.621488377 | 0.926774 |
| 12.6635  | 13.8474 | 0.772149  | -0.57514315  | 0.711367 |
| 13       | 10.5    | 0.568878  | -0.793549123 | 0.750854 |
| 0.5      | 0       | 1         | 0            | 0.450185 |
| 0        | 0       | ?         | #DIV/0!      | ?        |
| 6.5      | 10.5    | 0.828752  | 0.547487795  | 0.942294 |
| 659.501  | 627.001 | 0.72791   | -0.62376405  | 0.76421  |
| 10210    | 9711.5  | 0.508075  | -0.723370642 | 0.55835  |
| 13824.6  | 12691   | 0.5962    | -0.682040423 | 0.675385 |
| 13381.1  | 12537.4 | 0.561166  | -0.722042262 | 0.622319 |
| 12316.5  | 11441.5 | 0.487217  | -0.778938513 | 0.558944 |
| 16658.4  | 16359.6 | 0.603053  | -0.648746264 | 0.620281 |
| 10457.5  | 8872.94 | 0.644406  | -0.552796728 | 0.806146 |
| 1279.5   | 1361.5  | 0.841388  | -0.299690389 | 0.788943 |
| 198.004  | 178.256 | 0.903012  | -0.229941201 | 0.96856  |
| 301.5    | 262.5   | 0.894767  | 0.233619486  | 0.818985 |
| 43       | 37      | 0.512105  | -0.644905041 | 0.680318 |
| 5759.49  | 6413.55 | 0.944912  | -0.113682529 | 0.863244 |
| 1804     | 1760.51 | 0.948625  | -0.107477578 | 0.965859 |
| 4        | 2       | 0.606286  | -0.678071905 | 0.860525 |

|         |         |           |              |           |
|---------|---------|-----------|--------------|-----------|
| 0       | 0.5     | 0.450185  | #DIV/0!      | 1         |
| 360     | 373.5   | 0.652708  | -0.736965594 | 0.623855  |
| 56      | 62      | 0.868196  | 0.258734268  | 0.939746  |
| 4       | 4       | 0.785812  | -0.678071905 | 0.785812  |
| 65.5    | 40.5    | 0.781424  | 0.306427001  | 0.485857  |
| 22.5    | 23.5    | 0.858275  | 0.341036918  | 0.881596  |
| 4703.01 | 5490.46 | 0.627248  | -0.709771562 | 0.496655  |
| 1.5     | 1.5     | 0.613399  | -1.584962501 | 0.613399  |
| 1475.5  | 1610.01 | 0.890902  | -0.220937912 | 0.822332  |
| 83.1901 | 87.8726 | 0.885203  | -0.190865138 | 0.834062  |
| 1       | 1.5     | 0.651448  | -1           | 0.391002  |
| 757.502 | 815.502 | 0.616439  | -0.68859201  | 0.55123   |
| 403.5   | 481     | 0.642795  | -1.019800243 | 0.529662  |
| 14      | 35      | 0.830864  | -0.559427409 | 0.278678  |
| 172     | 217     | 0.925871  | 0.143590854  | 0.889119  |
| 52.5    | 65.5    | 0.20613   | -0.669851398 | 0.0750135 |
| 2117    | 2098    | 0.861792  | 0.255118911  | 0.855488  |
| 12.5    | 8.5     | 0.434707  | -0.943416472 | 0.783893  |
| 358.499 | 335.499 | 0.91664   | -0.148207842 | 0.971348  |
| 0       | 0       | ?         | #DIV/0!      | ?         |
| 137.5   | 121.5   | 0.768897  | -0.430862466 | 0.871056  |
| 3269.49 | 2705.43 | 0.606742  | -0.820752921 | 0.752742  |
| 13.5    | 17      | 1         | 0            | 0.720062  |
| 53      | 60.5    | 0.962264  | 0.066495412  | 0.924661  |
| 648.5   | 584     | 0.912116  | -0.13639162  | 0.990958  |
| 0       | 0       | ?         | #DIV/0!      | ?         |
| 2.5432  | 0       | 0.0343973 | -2.346644922 | 0.432532  |
| 1256.5  | 1236.49 | 0.972863  | -0.041926556 | 0.987943  |
| 63      | 44.5    | 0.980618  | 0.04508789   | 0.804461  |
| 38.5    | 43.5    | 0.829842  | -0.433896527 | 0.7485    |
| 5004.03 | 6860.39 | 0.808118  | -0.426035929 | 0.562213  |
| 3018    | 4020    | 0.826948  | -0.367392577 | 0.596449  |
| 0       | 0       | 0.308068  | #DIV/0!      | 0.308068  |
| 14      | 28      | 0.732024  | -1.106915204 | 0.360192  |
| 1       | 2.5     | 0.680109  | #NUM!        | 0.338084  |
| 159.5   | 187     | 0.84315   | -0.323059177 | 0.715393  |
| 713     | 874     | 0.68161   | -1.120206262 | 0.566693  |
| 604.5   | 552     | 0.873517  | -0.196571246 | 0.959515  |
| 1564.5  | 1729.5  | 0.599705  | -1.160274831 | 0.53622   |
| 221.747 | 194.508 | 0.810687  | -0.347242696 | 0.918406  |
| 112     | 109.5   | 0.893867  | -0.207443567 | 0.911431  |
| 848     | 996     | 0.925945  | -0.192645078 | 0.82442   |
| 1082    | 1099    | 0.744138  | -0.4105998   | 0.72887   |
| 1428.5  | 1330.5  | 0.881783  | 0.251882105  | 0.840048  |
| 270     | 285     | 0.883684  | -0.237611809 | 0.84189   |
| 833.5   | 888.5   | 0.853887  | -0.288353153 | 0.802162  |
| 3273    | 3609.5  | 0.594011  | -0.709171628 | 0.506705  |
| 2212.5  | 2376.5  | 0.81694   | -0.362430358 | 0.758451  |
| 724     | 755.5   | 0.714132  | -0.624864539 | 0.681582  |
| 1426    | 1107.5  | 0.0578452 | -0.862128629 | 0.228531  |
| 3610.5  | 3908.5  | 0.896698  | -0.231846836 | 0.84026   |
| 1905.99 | 1786.02 | 0.702806  | -0.549257177 | 0.758696  |
| 1193.5  | 1010    | 0.720439  | -0.317101005 | 0.936282  |
| 407.5   | 339     | 0.718305  | -0.434642057 | 0.897353  |
| 1653    | 1731.5  | 0.785228  | -0.388803337 | 0.744206  |
| 11531.5 | 10771.6 | 0.716584  | -0.470779106 | 0.78059   |

|         |         |          |              |          |
|---------|---------|----------|--------------|----------|
| 2139    | 2476.93 | 0.945836 | -0.147214805 | 0.858631 |
| 6278.5  | 7164.5  | 0.880572 | -0.299074283 | 0.793069 |
| 151.5   | 174     | 0.842585 | -0.403970195 | 0.750875 |
| 2597.5  | 2304    | 0.588192 | -0.695449607 | 0.698896 |
| 373.5   | 340.5   | 0.60937  | -0.7834132   | 0.684044 |
| 824     | 907     | 0.806132 | -0.372483823 | 0.724906 |
| 4644.51 | 4570.07 | 0.783148 | -0.429134956 | 0.796178 |
| 286     | 312.5   | 0.815502 | -0.36545547  | 0.742706 |
| 1782.5  | 1672.5  | 0.749538 | -0.433910726 | 0.806933 |
| 366.5   | 508     | 0.841225 | -0.427556968 | 0.622544 |
| 2093.5  | 2119    | 0.542341 | -0.736506247 | 0.530961 |
| 818     | 770.5   | 0.924372 | -0.126172365 | 0.976765 |
| 833.285 | 951.315 | 0.854024 | -0.254686219 | 0.732134 |
| 1391.99 | 1514.99 | 0.882692 | -0.240809308 | 0.816799 |
| 583     | 562.5   | 0.850455 | 0.315479731  | 0.829426 |
| 189.175 | 246.584 | 0.578254 | -1.326677522 | 0.418639 |
| 4.38801 | 2.50771 | 0.553335 | 1.036704393  | 0.418026 |
| 15763.1 | 12355.4 | 0.733766 | -0.360863521 | 0.993656 |
| 120.5   | 192     | 0.676446 | -1.079999322 | 0.399715 |
| 8416.49 | 9223.52 | 0.941769 | -0.12705118  | 0.87615  |
| 713.5   | 494.5   | 0.413342 | -1.70398256  | 0.634181 |
| 611.999 | 293.5   | 0.498266 | 1.085811336  | 0.342678 |
| 14      | 14      | 0.371908 | 1.567684509  | 0.371908 |
| 321     | 221.5   | 0.607152 | -0.94705112  | 0.851583 |
| 168     | 158.499 | 0.799371 | -0.443950191 | 0.841195 |
| 13260.5 | 13469.5 | 0.837088 | -0.390282326 | 0.826515 |
| 58      | 69      | 0.576657 | -1.813586876 | 0.487295 |
| 114     | 97.5    | 0.590886 | -1.078002512 | 0.693024 |
| 147.5   | 392     | 0.932029 | -0.273833807 | 0.398978 |
| 4068.5  | 2663.5  | 0.535124 | -1.274748212 | 0.792534 |
| 1712    | 2202    | 0.740875 | -0.699123607 | 0.571689 |
| 439.5   | 346.5   | 0.615226 | -1.128674842 | 0.755605 |
| 818     | 1080.51 | 0.741858 | -0.785692756 | 0.569227 |
| 203     | 232     | 0.882517 | 0.274243297  | 0.96249  |
| 80.5    | 69.5    | 0.645623 | -0.701560258 | 0.76406  |
| 2       | 4       | 0.36267  | 2.087462841  | 0.512179 |
| 83      | 115.5   | 0.964133 | -0.098915026 | 0.758119 |
| 49.5    | 54.5    | 0.979367 | -0.044394119 | 0.910867 |
| 1       | 0.5     | 0.353387 | #NUM!        | 0.622002 |
| 4249.5  | 3702.5  | 0.52136  | -0.781906196 | 0.650612 |
| 1310    | 1260    | 0.723784 | -0.416506639 | 0.763714 |
| 2699.5  | 2670.5  | 0.849448 | -0.35442397  | 0.856745 |
| 2136.5  | 2306.5  | 0.931605 | -0.176099954 | 0.884657 |
| 1616    | 1883    | 0.749134 | -0.753576861 | 0.655953 |
| 72.5    | 50.5    | 0.805085 | -0.359730128 | 0.925902 |
| 1278.5  | 1383    | 0.812504 | -0.452185591 | 0.757998 |
| 567     | 573.5   | 0.923044 | -0.190102883 | 0.915938 |
| 988     | 941.5   | 0.761743 | -0.385170959 | 0.807964 |
| 5       | 3.5     | 0.784667 | 0.485426827  | 0.637318 |
| 1483.5  | 1424    | 0.812987 | -0.381870635 | 0.844531 |
| 1798.59 | 1970.42 | 0.952205 | -0.114397426 | 0.892716 |
| 197     | 215.5   | 0.577117 | -0.656267535 | 0.490362 |
| 1040    | 1212.5  | 0.899966 | -0.275013984 | 0.806608 |
| 528.5   | 459     | 0.650211 | -0.557919628 | 0.786432 |
| 1664    | 1574.5  | 0.758444 | -0.431897718 | 0.806919 |
| 3576    | 3613.5  | 0.708957 | -0.54115532  | 0.699919 |

|         |         |          |              |          |
|---------|---------|----------|--------------|----------|
| 658.001 | 669.502 | 0.83234  | -0.30260421  | 0.817261 |
| 353     | 335     | 0.626932 | -0.643345411 | 0.67479  |
| 440.142 | 561.807 | 0.857725 | -0.337667568 | 0.680846 |
| 330.5   | 327     | 0.953921 | -0.113477892 | 0.960363 |
| 7.5     | 10      | 0.35288  | -1.321928095 | 0.186525 |
| 2536.5  | 2381    | 0.724868 | -0.541266591 | 0.776289 |
| 1273.5  | 1294    | 0.736002 | -0.534863889 | 0.723136 |
| 24.5    | 35      | 0.610548 | -1.155278225 | 0.387929 |
| 511.5   | 580.5   | 0.658158 | -0.541209551 | 0.534141 |
| 1381    | 1226.5  | 0.606685 | -0.457083014 | 0.758307 |
| 2500.5  | 2669.95 | 0.943438 | 0.121920352  | 0.986889 |
| 917.5   | 1061.5  | 0.821508 | -0.428994501 | 0.718453 |
| 1190    | 1103    | 0.753653 | -0.502500341 | 0.81283  |
| 277.5   | 257     | 0.942669 | 0.119670231  | 0.894047 |
| 1355    | 1401.5  | 0.849763 | -0.354909264 | 0.826669 |
| 1448.5  | 1664    | 0.731093 | -0.436948888 | 0.595479 |
| 1049.5  | 1137.99 | 0.808152 | -0.393434758 | 0.743605 |
| 0       | 0       | 0.308068 | #DIV/0!      | 0.308068 |
| 0       | 0       | ?        | #DIV/0!      | ?        |
| 0.5     | 0       | 0.622002 | 1            | 0.353387 |
| 373.5   | 334.5   | 0.929363 | -0.13982297  | 0.990768 |
| 279     | 158.5   | 0.99212  | -0.015596855 | 0.702833 |
| 2136    | 1895.5  | 0.817321 | -0.289206462 | 0.929722 |
| 26.5    | 29.5    | 0.815695 | -0.173331603 | 0.64607  |
| 2790    | 2398.5  | 0.7127   | -0.477382614 | 0.851968 |
| 1587.02 | 1572.5  | 0.672162 | -0.615282381 | 0.680054 |
| 351.501 | 377.001 | 0.838001 | -0.348865754 | 0.785118 |
| 1698.53 | 1878.55 | 0.747432 | -0.726553072 | 0.68481  |
| 547     | 560     | 0.815238 | -0.451540833 | 0.799421 |
| 0.5     | 0       | 0.308068 | #NUM!        | 1        |
| 15.5    | 9.5     | 0.734349 | -0.36923381  | 0.807474 |
| 17.5    | 11      | 0.955707 | -0.084888898 | 0.761963 |
| 1648.49 | 1839.5  | 0.905923 | -0.228533061 | 0.832856 |
| 901.5   | 843.501 | 0.807628 | -0.398331167 | 0.85792  |
| 158     | 166.5   | 0.460903 | -1.764621937 | 0.430918 |
| 254     | 250.346 | 0.699343 | -0.764683013 | 0.709103 |
| 4637.49 | 3957.49 | 0.617639 | -1.186544111 | 0.709466 |
| 426.5   | 319     | 0.432988 | -1.872215787 | 0.596681 |
| 478.999 | 551.497 | 0.865172 | -0.30955423  | 0.763345 |
| 1311.5  | 1380    | 0.792994 | -0.463697527 | 0.755455 |
| 1308.5  | 1323.5  | 0.615941 | -0.56253532  | 0.604072 |
| 642.502 | 729.992 | 0.904942 | -0.215112415 | 0.813523 |
| 150.5   | 161.5   | 0.956375 | -0.099193357 | 0.908631 |
| 399.001 | 343     | 0.62247  | -0.52130229  | 0.788054 |
| 259.5   | 233     | 0.476582 | -0.795589054 | 0.581563 |
| 232     | 269.501 | 0.795513 | -0.474276703 | 0.685545 |
| 1461.98 | 1101.01 | 0.898592 | -0.20933372  | 0.915913 |
| 389     | 377     | 0.586531 | -0.575720348 | 0.620395 |
| 617.002 | 572.505 | 0.770278 | -0.400305715 | 0.836839 |
| 480.549 | 453.582 | 0.671583 | -0.50315997  | 0.729965 |
| 652.5   | 710.5   | 0.373534 | -0.864004783 | 0.300258 |
| 1104    | 1133.99 | 0.932712 | -0.147807149 | 0.914048 |
| 295     | 308     | 0.723713 | -0.53568616  | 0.687464 |
| 460.5   | 482.5   | 0.825251 | -0.375382132 | 0.790027 |
| 252     | 316.001 | 0.971778 | -0.064390587 | 0.810382 |
| 243.5   | 287     | 0.940152 | -0.143143117 | 0.828808 |



|         |         |          |              |          |
|---------|---------|----------|--------------|----------|
| 613.5   | 621.5   | 0.98151  | -0.042961836 | 0.973297 |
| 3903.61 | 4125.5  | 0.623111 | -1.170688385 | 0.589789 |
| 358     | 289.5   | 0.71589  | -0.447642165 | 0.917089 |
| 402.5   | 584     | 0.921653 | -0.232884795 | 0.696168 |
| 687     | 792.5   | 0.82021  | -0.500838803 | 0.730795 |
| 832.5   | 815     | 0.83532  | -0.368151112 | 0.850392 |
| 1476.5  | 1699.5  | 0.930847 | -0.189786391 | 0.8473   |
| 250     | 246.5   | 0.859427 | -0.289827252 | 0.870083 |
| 145     | 142.5   | 0.708904 | -0.656347134 | 0.721731 |
| 611     | 659     | 0.90715  | -0.206541696 | 0.853257 |
| 10.5    | 14.5    | 0.97151  | 0.067114196  | 0.803701 |
| 851     | 810.5   | 0.769171 | -0.477986752 | 0.806804 |
| 1370.5  | 1505.5  | 0.923565 | -0.115564943 | 0.827492 |
| 1416    | 1430.5  | 0.778278 | -0.423894687 | 0.769744 |
| 598.367 | 620.46  | 0.887412 | -0.222555579 | 0.858764 |
| 340     | 354     | 0.860273 | -0.290449863 | 0.829411 |
| 915     | 990     | 0.870797 | -0.303325051 | 0.816272 |
| 626     | 582     | 0.642031 | -1.070850326 | 0.685818 |
| 375     | 338     | 0.884147 | -0.219829907 | 0.964849 |
| 671     | 642.5   | 0.812791 | -0.333531241 | 0.850514 |
| 443     | 460     | 0.869851 | -0.313404622 | 0.84474  |
| 1306.5  | 1312.5  | 0.812751 | -0.34236262  | 0.808802 |
| 0       | 0       | ?        | #DIV/0!      | ?        |
| 777.5   | 684     | 0.813426 | -0.314986485 | 0.92692  |
| 1232.89 | 1368.82 | 0.866882 | -0.308921912 | 0.792955 |
| 406     | 652     | 0.5893   | -1.356996887 | 0.315767 |
| 1665    | 1907.5  | 0.688493 | -0.832483907 | 0.597473 |
| 56.5    | 39.5    | 0.961402 | 0.074638801  | 0.749294 |
| 1818.5  | 2040    | 0.78206  | -0.47208124  | 0.693302 |
| 592     | 601.5   | 0.879579 | -0.271344039 | 0.868462 |
| 154.847 | 187.28  | 0.895663 | 0.237709012  | 0.982255 |
| 357     | 353.5   | 0.873722 | -0.224751694 | 0.882202 |
| 1057    | 979     | 0.849602 | -0.24647804  | 0.919731 |
| 591.5   | 391     | 0.688194 | -0.325591309 | 0.783884 |
| 0.5     | 0.5     | 1        | 0            | 1        |
| 116.5   | 113     | 0.369075 | -1.714439025 | 0.387324 |
| 2693.53 | 2622.65 | 0.366257 | -0.772004463 | 0.393364 |
| 96.5    | 132.5   | 0.66533  | -0.992544195 | 0.464278 |
| 65      | 71      | 0.895098 | -0.267480311 | 0.838891 |
| 3451.5  | 3742    | 0.615794 | -1.022113122 | 0.561748 |
| 652     | 689.5   | 0.82851  | -0.417990817 | 0.79059  |
| 11.5    | 35      | 0.784804 | -0.938599455 | 0.213574 |
| 339     | 358     | 0.891578 | -0.257936538 | 0.855023 |
| 2308.5  | 1953.5  | 0.89719  | -0.166764661 | 0.957825 |
| 405.002 | 410.501 | 0.935354 | -0.136268328 | 0.925656 |
| 284     | 314.5   | 0.776581 | -0.442387987 | 0.691908 |
| 6       | 15      | 0.526666 | 1.058893689  | 0.801387 |
| 30.5    | 37.5    | 0.577525 | 0.317190176  | 0.969488 |
| 173     | 166.5   | 0.834938 | -0.336596145 | 0.864239 |
| 12      | 13.5    | 0.938804 | 0.169925001  | 1        |
| 390.5   | 460.5   | 0.853541 | -0.366004755 | 0.741461 |
| 1378.51 | 1395.51 | 0.782162 | -0.419051407 | 0.771953 |
| 891     | 1059    | 0.840218 | -0.397335498 | 0.72142  |
| 1642    | 1775    | 0.887158 | -0.285168854 | 0.83714  |
| 46      | 5.5     | 0.604552 | 0.595379117  | 0.214291 |
| 394.5   | 270     | 0.467859 | -0.75351677  | 0.864337 |

|         |          |           |              |           |
|---------|----------|-----------|--------------|-----------|
| 17153.1 | 17007.6  | 0.195972  | -0.968442541 | 0.201825  |
| 2083.99 | 1758.5   | 0.655092  | -0.429875158 | 0.85811   |
| 946.5   | 955      | 0.0510325 | -0.835249755 | 0.0485702 |
| 1069    | 1233     | 0.600269  | -0.593422095 | 0.45798   |
| 1810.5  | 1493.5   | 0.575545  | -0.536770243 | 0.802332  |
| 285     | 240.5    | 0.183896  | -0.584962501 | 0.427939  |
| 1319.18 | 1225.61  | 0.912545  | -0.185230603 | 0.963934  |
| 532     | 561.5    | 0.786519  | -0.455369593 | 0.74495   |
| 2496.5  | 2571     | 0.887229  | -0.289217703 | 0.868947  |
| 27158.4 | 27153.9  | 0.761328  | -0.54339141  | 0.761447  |
| 4098.57 | 3779.49  | 0.605584  | -0.942574897 | 0.662988  |
| 6380.02 | 6288.22  | 0.932394  | -0.167990087 | 0.941217  |
| 3996.55 | 4635.42  | 0.85231   | -0.420594121 | 0.762488  |
| 2542    | 2781.5   | 0.928385  | -0.185366484 | 0.873007  |
| 230.5   | 259      | 0.984435  | -0.031639317 | 0.896168  |
| 873.504 | 942.494  | 0.494262  | -0.741380511 | 0.421578  |
| 421     | 439.5    | 0.874633  | -0.295611657 | 0.845429  |
| 3759.02 | 3977.58  | 0.797957  | -0.432404737 | 0.754659  |
| 1224    | 1205     | 0.74531   | -0.59917636  | 0.756357  |
| 28000.5 | 36516.1  | 0.31418   | -2.601781729 | 0.198435  |
| 421     | 425      | 0.81323   | -0.316796987 | 0.804507  |
| 0.6904  | 1.57E-13 | 0.308068  | -37.92626569 | 1         |
| 217     | 266      | 0.90209   | -0.214656773 | 0.748025  |
| 200.5   | 202.5    | 0.843672  | -0.289906422 | 0.835293  |
| 293.5   | 289      | 0.830134  | -0.329937953 | 0.842603  |
| 1427    | 1678     | 0.932743  | -0.159097499 | 0.821497  |
| 1156    | 1186.5   | 0.697508  | -0.858644151 | 0.681181  |
| 1442    | 1425.5   | 0.909243  | -0.185505041 | 0.9178    |
| 1814.52 | 1649.02  | 0.678469  | -0.420220141 | 0.789102  |
| 1517    | 1353     | 0.586734  | -0.581874997 | 0.709815  |
| 1674.5  | 1520     | 0.381324  | -0.698986555 | 0.493436  |
| 1603.5  | 1600.5   | 0.890114  | -0.211338378 | 0.891608  |
| 3114.5  | 3039.5   | 0.641161  | -0.60972439  | 0.663784  |
| 276.5   | 235.5    | 0.981546  | -0.026327282 | 0.868069  |
| 2317    | 1834.5   | 0.581669  | -0.531483619 | 0.854543  |
| 3578    | 3569.5   | 0.681886  | -0.597923352 | 0.683928  |
| 3866.49 | 3938.49  | 0.83349   | -0.333072514 | 0.818841  |
| 1747    | 1578.5   | 0.644745  | -0.752463714 | 0.722892  |
| 202.5   | 291      | 0.901176  | 0.226965151  | 0.846213  |
| 449.5   | 406.5    | 0.686669  | -0.583358615 | 0.772171  |
| 676.498 | 710.5    | 0.821423  | -0.411835058 | 0.786531  |
| 2691.5  | 2333     | 0.745012  | -0.422651156 | 0.876152  |
| 985.5   | 1203.5   | 0.857913  | -0.319003218 | 0.707836  |
| 1130.55 | 1194.91  | 0.871824  | -0.275958273 | 0.830781  |
| 835.5   | 822.5    | 0.850139  | -0.28969849  | 0.862748  |
| 4984    | 8372.5   | 0.821412  | -0.562844095 | 0.500272  |
| 27.5    | 27       | 0.838956  | -0.389042291 | 0.851108  |
| 62      | 66       | 0.544247  | -1.632268215 | 0.509381  |
| 181     | 223.5    | 0.86244   | -0.375724575 | 0.728079  |
| 169.5   | 196.5    | 0.692395  | -0.761285273 | 0.587766  |
| 4       | 4        | 0.743666  | -0.678071905 | 0.743666  |
| 229.5   | 541.5    | 0.852472  | -0.538569595 | 0.356868  |
| 204.653 | 554.986  | 0.617868  | -1.155350773 | 0.107205  |
| 15      | 23.5     | 0.721772  | -0.906890596 | 0.450079  |
| 682.5   | 1899     | 0.786796  | -1.129283017 | 0.294799  |
| 89.5    | 102.5    | 0.990143  | -0.024384159 | 0.905066  |

|         |         |          |              |          |
|---------|---------|----------|--------------|----------|
| 20.5    | 23      | 0.959147 | -0.109624491 | 0.891513 |
| 38.5    | 35.5    | 0.818691 | -0.485426827 | 0.867289 |
| 2.5     | 27      | 0.932707 | -1.321928095 | 0.210125 |
| 225     | 193     | 0.460305 | -1.528378972 | 0.555931 |
| 6.5     | 3.5     | 0.209089 | -2.115477217 | 0.568955 |
| 0       | 2       | 0.450185 | #DIV/0!      | 1        |
| 1       | 2       | 0.450185 | #NUM!        | 0.18169  |
| 491     | 333.5   | 0.477136 | -1.492495988 | 0.711297 |
| 1250.5  | 1399.5  | 0.889442 | -0.282664793 | 0.817047 |
| 149.5   | 212.5   | 0.850287 | -0.455817349 | 0.635701 |
| 459.5   | 433.5   | 0.836071 | -0.36212162  | 0.877251 |
| 140     | 290     | 0.890543 | -0.408183828 | 0.482077 |
| 1599.5  | 1434    | 0.565366 | -0.577316087 | 0.688398 |
| 1651.97 | 1941.5  | 0.702887 | -0.673859934 | 0.580929 |
| 0.51268 | 9.15189 | 0.76623  | 2.587868321  | 0.498048 |
| 148.5   | 147     | 0.85648  | -0.307428525 | 0.863915 |
| 425.152 | 281.818 | 0.585319 | -0.765589041 | 0.919009 |
| 927.5   | 932.5   | 0.910006 | -0.191867554 | 0.906138 |
| 3732.53 | 3816.06 | 0.627964 | -0.652244566 | 0.607947 |
| 909.5   | 1079.5  | 0.52441  | -0.591719867 | 0.34521  |
| 7764    | 7032.5  | 0.617332 | -0.570127103 | 0.71917  |
| 1704.5  | 1763    | 0.733089 | -0.549018645 | 0.706128 |
| 19.5    | 14.5    | 0.772706 | -0.530514717 | 0.961307 |
| 2311    | 2529    | 0.270474 | -0.872805349 | 0.202037 |
| 7106.5  | 6708    | 0.56947  | -0.629702414 | 0.629204 |
| 3171.43 | 3139.99 | 0.921302 | -0.108331349 | 0.932044 |
| 353.5   | 446     | 0.665838 | -0.953813751 | 0.515419 |
| 3.5     | 4.5     | 0.824188 | 0.514573173  | 0.940721 |
| 57.5    | 77.5    | 0.935625 | -0.145050333 | 0.711495 |
| 0.5     | 5       | 0.824001 | 1.584962501  | 0.458318 |
| 23.5    | 37.5    | 0.825477 | -0.647698256 | 0.569703 |
| 379     | 317.5   | 0.883971 | -0.165174602 | 0.941743 |
| 476     | 372.5   | 0.654987 | -0.537265759 | 0.891266 |
| 31188.9 | 26687.1 | 0.663387 | -0.500849536 | 0.822739 |
| 1191.5  | 1169    | 0.5878   | -0.619580265 | 0.607133 |
| 2035    | 1907.5  | 0.653794 | -0.623398328 | 0.710883 |
| 1957.5  | 1453    | 0.617449 | -0.388384397 | 0.962475 |
| 78.4669 | 138.126 | 0.575469 | -1.357143548 | 0.253964 |
| 1480.5  | 1704    | 0.838549 | -0.433836692 | 0.748733 |
| 840.5   | 723.5   | 0.475029 | -0.956880795 | 0.602244 |
| 1071.5  | 1285.98 | 0.342558 | -1.622472639 | 0.240857 |
| 2882.99 | 3108.48 | 0.656532 | -0.71197401  | 0.596284 |
| 2598.5  | 2903.5  | 0.770487 | -0.523683412 | 0.6882   |
| 1460.51 | 1461.01 | 0.774361 | -0.44482216  | 0.774081 |
| 4306    | 6138    | 0.969853 | -0.078132812 | 0.734534 |
| 8334    | 9478    | 0.829891 | -0.441475517 | 0.745284 |
| 8329.67 | 9805.7  | 0.425576 | -1.068935012 | 0.306013 |
| 293.5   | 249.5   | 0.220727 | -1.665835233 | 0.314757 |
| 150     | 111     | 0.184817 | -2.447458977 | 0.326793 |
| 142     | 161     | 0.74639  | -0.484411202 | 0.638459 |
| 0.5     | 0.5     | 0.450185 | #NUM!        | 0.450185 |
| 5671.21 | 6797.8  | 0.775927 | -0.679357143 | 0.666582 |
| 3502.5  | 3820    | 0.827161 | -0.464977228 | 0.772438 |
| 2039    | 1508    | 0.657136 | 0.694604249  | 0.535589 |
| 936.638 | 980.813 | 0.859524 | -0.313941499 | 0.826407 |
| 71      | 78      | 0.988188 | -0.030806047 | 0.933183 |

|         |         |          |              |           |
|---------|---------|----------|--------------|-----------|
| 2644.46 | 2613.6  | 0.793038 | -0.464875592 | 0.801514  |
| 716     | 719     | 0.670424 | -0.923482943 | 0.667771  |
| 846.5   | 902     | 0.891546 | -0.250646311 | 0.84769   |
| 1120.5  | 1131    | 0.694127 | -0.899906498 | 0.688446  |
| 3079    | 2913.5  | 0.875539 | -0.251460676 | 0.917066  |
| 17      | 21      | 1        | 0            | 0.773457  |
| 35088   | 26969   | 0.995586 | 0.006911545  | 0.786982  |
| 20.5    | 28.5    | 0.914786 | -0.187627003 | 0.658785  |
| 551     | 494.5   | 0.472354 | -1.072485507 | 0.556626  |
| 403     | 368     | 0.833055 | -0.319245674 | 0.905347  |
| 0       | 0       | 0.308068 | #DIV/0!      | 0.308068  |
| 9       | 7       | 0.544169 | -1.847996907 | 0.669033  |
| 121.5   | 81      | 0.488266 | -0.764941167 | 0.890496  |
| 0       | 0       | ?        | #DIV/0!      | ?         |
| 157.5   | 155     | 0.615203 | -0.564498398 | 0.631876  |
| 0       | 0       | ?        | #DIV/0!      | ?         |
| 15      | 8.5     | 0.612655 | -0.736965594 | 0.965517  |
| 0.5     | 1.5     | 0.613399 | 1.584962501  | 1         |
| 26      | 11      | 0.827754 | -0.342887714 | 0.709482  |
| 16468.9 | 22085.4 | 0.849571 | -0.130047814 | 0.381277  |
| 362.385 | 429.556 | 0.763884 | -0.556884045 | 0.63949   |
| 909.5   | 377.5   | 0.917681 | -0.12243381  | 0.537036  |
| 3753.5  | 3546.5  | 0.698898 | -0.442784356 | 0.758305  |
| 629.997 | 687.992 | 0.907266 | -0.23580337  | 0.851488  |
| 15.5    | 14      | 0.48562  | -1.784271309 | 0.542519  |
| 0       | 0       | 0.308068 | #DIV/0!      | 0.308068  |
| 44.5    | 51      | 0.8024   | -0.475733431 | 0.705822  |
| 755.5   | 694     | 0.884655 | -0.233735301 | 0.947202  |
| 295.486 | 301.704 | 0.611261 | -0.86265006  | 0.595532  |
| 80.5    | 63      | 0.600345 | -0.602996424 | 0.845484  |
| 2240.5  | 2856    | 0.873865 | -0.304646271 | 0.701449  |
| 2.5     | 3.5     | 0.611155 | -2.321928095 | 0.458483  |
| 321.5   | 340.5   | 0.567501 | 0.990997194  | 0.589615  |
| 3067    | 3246.5  | 0.915717 | -0.16819147  | 0.871397  |
| 2952.05 | 2751.04 | 0.720447 | -0.66952822  | 0.769209  |
| 4303    | 4245.5  | 0.615197 | -1.053274793 | 0.623932  |
| 224     | 225     | 0.957397 | -0.093109404 | 0.954359  |
| 758     | 702.5   | 0.979787 | -0.038577032 | 0.964134  |
| 1822    | 1682    | 0.697104 | -0.521273928 | 0.769948  |
| 1117    | 1093.99 | 0.757926 | -0.460967964 | 0.775361  |
| 1481.01 | 1261.02 | 0.80401  | -0.361814631 | 0.934325  |
| 280     | 295.5   | 0.684087 | -0.96941168  | 0.651793  |
| 607.5   | 954     | 0.961413 | -0.109749486 | 0.67584   |
| 162.5   | 193     | 0.818652 | -0.467778961 | 0.702996  |
| 2378    | 2842.17 | 0.813807 | -0.319950144 | 0.645713  |
| 1016.5  | 1019    | 0.759414 | -0.52178895  | 0.757559  |
| 3330    | 3145    | 0.505396 | -0.671329115 | 0.566671  |
| 278     | 293     | 0.989595 | -0.026183932 | 0.958403  |
| 2202    | 2383    | 0.546654 | -0.66217356  | 0.467996  |
| 0.5     | 2.5     | 0.450185 | #NUM!        | 0.0227138 |
| 2618    | 3035.5  | 0.952193 | -0.103950964 | 0.843965  |
| 3418.99 | 3098.94 | 0.796155 | -0.392552688 | 0.874895  |
| 421     | 355     | 0.786075 | -0.427657576 | 0.915441  |
| 0.5     | 0       | 0.308068 | #NUM!        | 1         |
| 430     | 499.5   | 0.812621 | -0.424012303 | 0.700884  |
| 15588.7 | 13974.1 | 0.81598  | -0.383743553 | 0.896584  |

|         |         |          |              |           |
|---------|---------|----------|--------------|-----------|
| 1608.5  | 2105.5  | 0.824672 | -0.560064834 | 0.668114  |
| 6565    | 5528    | 0.73978  | -0.596767589 | 0.858247  |
| 5625.5  | 5364.5  | 0.217374 | -0.706221556 | 0.264147  |
| 4953.2  | 4522.14 | 0.486224 | -1.012332302 | 0.559048  |
| 18443.9 | 19974.8 | 0.834679 | -0.393066581 | 0.779168  |
| 8438    | 9075.5  | 0.840977 | -0.377793703 | 0.790492  |
| 2907.16 | 2740.35 | 0.691243 | -0.459273446 | 0.752501  |
| 1084.5  | 915.5   | 0.738619 | -0.290837517 | 0.960614  |
| 9.5     | 13      | 0.613892 | -1.440572591 | 0.43974   |
| 29      | 10.5    | 0.253688 | -1.334419039 | 0.940913  |
| 494     | 474.5   | 0.521723 | -1.965373657 | 0.542502  |
| 109.5   | 84      | 1        | 0            | 0.788969  |
| 396     | 412.5   | 0.692122 | -0.541893779 | 0.655002  |
| 14      | 19      | 0.195835 | -2.222392421 | 0.0948389 |
| 213     | 177     | 0.682832 | -0.491535637 | 0.863702  |
| 352.5   | 333     | 0.89261  | -0.178391094 | 0.943491  |
| 3843    | 3267.5  | 0.539396 | -1.179671546 | 0.647997  |
| 3028    | 2855    | 0.711084 | -0.511241862 | 0.763553  |
| 21.5    | 25.5    | 0.806928 | 0.355094959  | 0.934745  |
| 1199.5  | 1511.49 | 0.794651 | -0.450965415 | 0.614676  |
| 99      | 139.5   | 0.949352 | 0.138827705  | 0.84686   |
| 406     | 320     | 0.896543 | -0.1956941   | 0.930525  |
| 272.5   | 354     | 0.743118 | -0.668047653 | 0.562381  |
| 439     | 496.5   | 0.398435 | -0.89849388  | 0.296862  |
| 3       | 2       | 0.474021 | -1.584962501 | 0.710482  |
| 147     | 158.5   | 0.915763 | -0.155278225 | 0.852096  |
| 15722.6 | 16549.5 | 0.636214 | -0.3939953   | 0.567738  |
| 70      | 50.5    | 0.683729 | -0.499926397 | 0.983893  |
| 6660.65 | 8110.68 | 0.828499 | -0.345311704 | 0.665491  |
| 0.5     | 0.5     | 1        | 0            | 1         |
| 104     | 224.5   | 0.916959 | 0.271103836  | 0.637983  |
| 90      | 62      | 0.765308 | 0.444784843  | 0.585946  |
| 165.5   | 132.5   | 0.777535 | -0.434049468 | 0.947235  |
| 81      | 89      | 0.643454 | -1.111031312 | 0.586638  |
| 0       | 0       | ?        | #DIV/0!      | ?         |
| 3585.5  | 3394    | 0.603536 | -0.558548817 | 0.66266   |
| 4       | 2       | 0.562529 | -1.415037499 | 0.904922  |
| 701     | 526     | 0.572072 | -0.450455618 | 0.967871  |
| 658     | 520.5   | 0.639287 | -0.80352306  | 0.807955  |
| 10278   | 9896.77 | 0.607401 | -0.619617307 | 0.644462  |
| 150.5   | 98      | 0.665079 | -0.798991449 | 0.936915  |
| 1574.19 | 1488.21 | 0.818096 | -0.462125111 | 0.853625  |
| 1172    | 1084    | 0.507775 | -0.719023423 | 0.587043  |
| 15246.4 | 16745.2 | 0.901263 | -0.241064016 | 0.839275  |
| 1705.52 | 1524.96 | 0.783516 | -0.368068    | 0.883663  |
| 1992.5  | 1943    | 0.922672 | -0.139387316 | 0.943467  |
| 1127.5  | 1225    | 0.851306 | -0.343675633 | 0.792502  |
| 2421    | 2709.5  | 0.947392 | -0.120825468 | 0.870122  |
| 460.002 | 531.999 | 0.923634 | -0.192647766 | 0.829677  |
| 3256    | 3480    | 0.899944 | -0.193151553 | 0.845898  |
| 2623    | 2421    | 0.756122 | -0.444861236 | 0.824751  |
| 1447.31 | 1424.55 | 0.708005 | -0.575979352 | 0.721031  |
| 2569.53 | 2507.5  | 0.511009 | -1.879162148 | 0.524065  |
| 1.5     | 1       | 0.785812 | -0.584962501 | 1         |
| 549     | 487     | 0.22408  | -2.267772325 | 0.281534  |
| 270.5   | 315     | 0.849589 | -0.400004684 | 0.751595  |

|         |         |          |              |          |
|---------|---------|----------|--------------|----------|
| 38      | 42.5    | 0.683443 | -0.821662759 | 0.607179 |
| 88      | 103     | 0.840957 | -0.382616022 | 0.73017  |
| 1959.03 | 1517.5  | 0.588422 | -1.054803695 | 0.755206 |
| 48905.4 | 37977.6 | 0.417033 | -2.45872778  | 0.543912 |
| 332.5   | 387.5   | 0.970026 | -0.0688715   | 0.864648 |
| 4068.02 | 4616.48 | 0.945979 | 0.122162276  | 0.971573 |
| 187     | 148.5   | 0.53868  | 1.116656529  | 0.475278 |
| 33      | 41      | 0.840204 | -0.429684275 | 0.698511 |
| 415.5   | 440     | 0.687749 | -0.846955625 | 0.650289 |
| 39      | 42.5    | 0.704421 | -0.963474124 | 0.654989 |
| 732.5   | 1014    | 0.766403 | -0.878249035 | 0.591242 |
| 422     | 446.5   | 0.756464 | -0.440328419 | 0.706234 |
| 1216    | 1084.5  | 0.888216 | 0.232357807  | 0.820535 |
| 446     | 469.5   | 0.965071 | -0.079800711 | 0.930972 |
| 2980.59 | 3124.56 | 0.795303 | -0.4078675   | 0.756963 |
| 173     | 139.5   | 0.701369 | 0.573800394  | 0.597002 |
| 3134.1  | 2991.15 | 0.780851 | -0.423967708 | 0.818929 |
| 916     | 986.5   | 0.860748 | -0.293274019 | 0.804066 |
| 777     | 785.5   | 0.857396 | -0.334984248 | 0.850004 |
| 4370.5  | 4217    | 0.739496 | -0.522541075 | 0.768182 |
| 1058.49 | 993.502 | 0.750902 | -0.499933418 | 0.801202 |
| 1322.5  | 1243.5  | 0.822444 | -0.361323892 | 0.869524 |
| 3277.47 | 3518.61 | 0.863561 | -0.245757106 | 0.801232 |
| 2126    | 2014.5  | 0.67426  | -0.564579641 | 0.723354 |
| 1421    | 1452.5  | 0.776961 | -0.413346378 | 0.758039 |
| 5       | 1.5     | 0.492814 | -1.321928095 | 0.904922 |
| 9711.91 | 15909.8 | 0.970335 | 0.090660353  | 0.744818 |
| 2224.94 | 4567.25 | 0.859293 | -0.62470513  | 0.496818 |
| 109.5   | 147     | 0.961697 | 0.083193936  | 0.819678 |
| 1532.5  | 3786.98 | 0.868101 | -0.647974803 | 0.42742  |
| 328     | 1178.5  | 0.92993  | -0.465768301 | 0.393854 |
| 143.5   | 199.5   | 0.810183 | 0.471717694  | 0.998264 |
| 47127.9 | 48982.9 | 0.931296 | -0.153984391 | 0.904755 |
| 89      | 95      | 0.573236 | 1.142652071  | 0.593663 |
| 1600.5  | 1376.73 | 0.765437 | -0.514289903 | 0.87272  |
| 13468.2 | 19234.1 | 0.994509 | 0.01473896   | 0.78104  |
| 48      | 58.5    | 0.44213  | -2.263034406 | 0.34162  |
| 83.5    | 77.5    | 0.933122 | 0.139857664  | 0.886313 |
| 79.5    | 109     | 0.782273 | -0.773724144 | 0.60722  |
| 213     | 174     | 0.781686 | -0.605426603 | 0.896716 |
| 1854.53 | 1021.5  | 0.94571  | 0.108585675  | 0.652179 |
| 130     | 168.5   | 0.936806 | -0.183164025 | 0.78377  |
| 1818.5  | 1736    | 0.976121 | 0.053345497  | 0.947409 |
| 6       | 13.5    | 0.931335 | -0.263034406 | 0.484442 |
| 51211.8 | 56435.4 | 0.975278 | -0.052268983 | 0.904744 |
| 572.497 | 742.364 | 0.966095 | -0.093593158 | 0.808797 |
| 11510.9 | 12804.9 | 0.716136 | -0.905978304 | 0.653927 |
| 9361.5  | 9682    | 0.716315 | -0.813551851 | 0.69546  |
| 24      | 22.5    | 0.699782 | 0.662965013  | 0.670397 |
| 422.5   | 373.5   | 0.953309 | 0.089369774  | 0.869384 |
| 38.5    | 49.5    | 0.78047  | 0.553392422  | 0.913149 |
| 6997.14 | 8222.86 | 0.85937  | 0.348386406  | 0.9492   |
| 12823   | 13276   | 0.825235 | 0.42044183   | 0.843091 |
| 11138.6 | 11358.4 | 0.890266 | -0.279423095 | 0.878111 |
| 9586.22 | 18494.6 | 0.982647 | 0.054792548  | 0.624764 |
| 741.495 | 823.495 | 0.908686 | -0.240816907 | 0.844044 |

|          |         |          |              |          |
|----------|---------|----------|--------------|----------|
| 246.5    | 273     | 0.85923  | -0.364243254 | 0.793416 |
| 230.5    | 353.5   | 0.977725 | -0.070545811 | 0.736497 |
| 27       | 26      | 0.650914 | 0.830074999  | 0.636094 |
| 891      | 625     | 0.942334 | -0.113656782 | 0.832168 |
| 126      | 155     | 0.928002 | 0.167378319  | 0.93726  |
| 2206     | 2056    | 0.87952  | -0.265259676 | 0.928019 |
| 7445.58  | 9262.33 | 0.79264  | 0.451253075  | 0.929299 |
| 3715     | 5643.5  | 0.869956 | -0.395111343 | 0.612062 |
| 6        | 8.5     | 0.725181 | -0.584962501 | 0.448923 |
| 7        | 5       | 0.659835 | -0.807354922 | 0.881442 |
| 2434.53  | 2266.06 | 0.942386 | -0.130454056 | 0.988487 |
| 3        | 11.5    | 0.804606 | -1.584962501 | 0.251224 |
| 1678.5   | 1682    | 0.556228 | -0.526223533 | 0.553708 |
| 609.5    | 706.5   | 0.713985 | -0.320745073 | 0.521077 |
| 1561.5   | 1556    | 0.732208 | -0.42322193  | 0.735701 |
| 1599     | 1543    | 0.168279 | -0.745865095 | 0.197222 |
| 4111     | 3968.5  | 0.2311   | -0.67491694  | 0.267322 |
| 3143.5   | 3013    | 0.627733 | -0.622035685 | 0.667536 |
| 714.5    | 774.5   | 0.869134 | -0.237616218 | 0.798763 |
| 1805.5   | 1617    | 0.462519 | -0.83518913  | 0.567387 |
| 1014     | 939     | 0.625887 | -0.597824652 | 0.700579 |
| 737.561  | 692.547 | 0.478075 | -0.664492669 | 0.548246 |
| 56       | 66      | 0.88502  | 0.269460675  | 0.984922 |
| 2553.5   | 1871    | 0.957876 | -0.053524543 | 0.740343 |
| 111.5    | 104.5   | 0.574599 | -0.906082137 | 0.624633 |
| 15841.6  | 16106.9 | 0.804158 | -0.406779875 | 0.791276 |
| 6226     | 6587    | 0.841963 | -0.290073158 | 0.793221 |
| 6787     | 7173.5  | 0.816549 | -0.373620246 | 0.77253  |
| 7808     | 7397    | 0.565125 | -0.490387218 | 0.634804 |
| 12176.5  | 13035   | 0.761256 | -0.429704828 | 0.700289 |
| 5689     | 5733.5  | 0.714145 | -0.504033284 | 0.707097 |
| 6        | 8       | 0.527911 | -2.584962501 | 0.392404 |
| 1452.49  | 1318.07 | 0.772392 | -0.38297327  | 0.860832 |
| 1853.5   | 1838.5  | 0.80396  | -0.389450062 | 0.810463 |
| 3282     | 3077    | 0.688821 | -0.444644429 | 0.758025 |
| 3748.97  | 3319.59 | 0.24425  | -0.954906486 | 0.350557 |
| 3739     | 3559.5  | 0.637535 | -0.510884751 | 0.690828 |
| 1023.5   | 1031    | 0.745235 | -0.518505186 | 0.739396 |
| 1440     | 1422    | 0.616601 | -0.719538522 | 0.627365 |
| 370.5    | 333.5   | 0.686985 | -0.52490111  | 0.784626 |
| 112.01   | 153.519 | 0.920922 | -0.199623784 | 0.704626 |
| 336      | 315.5   | 0.616471 | -0.610957709 | 0.677804 |
| 734      | 612.5   | 0.590412 | -0.64158534  | 0.76742  |
| 2179.5   | 2277.5  | 0.56176  | -0.60395218  | 0.515064 |
| 927      | 920.5   | 0.750254 | -0.463035071 | 0.756314 |
| 1290     | 1457    | 0.701797 | -0.438337587 | 0.573587 |
| 746      | 697     | 0.571401 | -0.467552671 | 0.662035 |
| 2305     | 2179    | 0.466999 | -0.628486493 | 0.533106 |
| 0        | 0       | ?        | #DIV/0!      | ?        |
| 2.96E-16 | 0       | ?        | #NUM!        | ?        |
| 2.96E-16 | 0       | 0.308068 | 51.5537924   | 0.308068 |
| 0        | 0       | ?        | #DIV/0!      | ?        |
| 2        | 2       | 0.481309 | -2           | 0.481309 |
| 0        | 0.00012 | 1        | #DIV/0!      | 0.308068 |
| 7.5      | 15      | 0.73566  | 0.847996907  | 0.93205  |
| 6252.59  | 7237.16 | 0.44077  | -1.041085131 | 0.330785 |

|         |         |           |              |           |
|---------|---------|-----------|--------------|-----------|
| 740     | 625.5   | 0.587781  | -1.05564803  | 0.699663  |
| 5044.5  | 4457.5  | 0.38098   | -1.647650591 | 0.458052  |
| 3764.34 | 3383.04 | 0.445223  | -1.201695183 | 0.523802  |
| 14290.5 | 16122   | 0.283456  | -1.647159931 | 0.219201  |
| 531218  | 475957  | 0.604651  | -0.595180226 | 0.716511  |
| 1254    | 1318.5  | 0.743144  | -0.539940986 | 0.703707  |
| 767.5   | 869     | 0.631981  | -0.624021008 | 0.517424  |
| 1316.5  | 1369.5  | 0.625741  | -0.503733706 | 0.581733  |
| 446.5   | 308     | 0.505547  | -0.531053337 | 0.995968  |
| 416.501 | 382.499 | 0.302448  | -0.891604514 | 0.381947  |
| 315     | 304     | 0.480507  | -0.64457199  | 0.520601  |
| 145923  | 127656  | 0.710643  | -0.471277407 | 0.836633  |
| 306856  | 255752  | 0.476859  | -0.576879734 | 0.715223  |
| 12245.1 | 10980.1 | 0.448105  | -0.604522119 | 0.586269  |
| 1067.5  | 1061.5  | 0.769335  | -0.303464032 | 0.775882  |
| 2728    | 2493.5  | 0.522427  | -0.728441132 | 0.611247  |
| 11629.5 | 14235   | 0.0670309 | -1.07531028  | 0.0277372 |
| 3514    | 4580.5  | 0.559113  | -0.605533645 | 0.304645  |
| 2748    | 2463    | 0.458936  | -0.726329931 | 0.576078  |
| 1166.5  | 1182    | 0.304121  | -0.771173064 | 0.291598  |
| 2870    | 2688.5  | 0.452629  | -0.776028588 | 0.518236  |
| 440     | 496.5   | 0.946123  | 0.12853337   | 0.979611  |
| 2.5     | 0       | 0.133887  | #NUM!        | 1         |
| 6       | 20.5    | 0.852926  | -1           | 0.323864  |
| 3158.5  | 4293.5  | 0.845546  | -0.464522109 | 0.658229  |
| 36.5    | 187     | 0.776451  | -2.382469637 | 0.154386  |
| 0.5     | 0.5     | 1         | 0            | 1         |
| 6024.5  | 6656.5  | 0.889351  | -0.270645689 | 0.822917  |
| 2384.5  | 2556    | 0.695654  | -0.662007366 | 0.642057  |
| 142     | 139.5   | 0.876777  | -0.261003871 | 0.889747  |
| 977     | 912.173 | 0.990887  | -0.021572021 | 0.968383  |
| 322.5   | 247     | 0.738057  | -0.632715632 | 0.908455  |
| 660     | 716.327 | 0.668139  | -1.067114196 | 0.620085  |
| 29.5    | 41      | 0.654744  | -1.359081093 | 0.476814  |
| 0       | 0       | ?         | #DIV/0!      | ?         |
| 1081.5  | 1288.5  | 0.824742  | -0.299098595 | 0.658775  |
| 1218.5  | 1087    | 0.603879  | -0.63342307  | 0.714369  |
| 1899    | 1909    | 0.850179  | -0.262123038 | 0.845522  |
| 593.497 | 550.996 | 0.878537  | -0.222998638 | 0.938993  |
| 422.5   | 392.5   | 0.794861  | -0.391890653 | 0.854809  |
| 789.004 | 510.001 | 0.468303  | -1.061638747 | 0.807487  |
| 15.5    | 25.5    | 1         | 0            | 0.490822  |
| 26.5    | 45.5    | 0.770136  | -0.869939459 | 0.469362  |
| 0.5     | 1.5     | 0.724378  | #NUM!        | 0.329316  |
| 1687    | 1746.5  | 0.598556  | -0.532273666 | 0.559823  |
| 892.5   | 847     | 0.971415  | -0.04265242  | 0.978558  |
| 79      | 88.9999 | 0.894262  | -0.270357747 | 0.817637  |
| 1810.5  | 1800.5  | 0.812895  | -0.347452515 | 0.81759   |
| 2952    | 2701.5  | 0.634037  | -0.599699044 | 0.718393  |
| 2242.5  | 2386.5  | 0.792452  | -0.363121621 | 0.735655  |
| 1269    | 1441    | 0.818391  | -0.371367028 | 0.715888  |
| 12.5    | 10.5    | 0.843737  | 0.310340121  | 0.744115  |
| 4514.5  | 4623    | 0.826951  | -0.380254327 | 0.809514  |
| 1336    | 1227.5  | 0.675075  | -0.57715467  | 0.75033   |
| 1182.98 | 1493.01 | 0.934327  | -0.180290152 | 0.791294  |
| 1356.5  | 1377    | 0.797904  | -0.36949972  | 0.784889  |



|         |         |          |              |          |
|---------|---------|----------|--------------|----------|
| 16      | 35      | 0.629398 | 0.977279923  | 0.911383 |
| 301.5   | 689.005 | 0.761147 | -0.927675162 | 0.304791 |
| 1650.5  | 1746.5  | 0.876713 | -0.265046228 | 0.834825 |
| 2.5     | 3.5     | 0.651448 | -1.321928095 | 0.465798 |
| 1034.5  | 1400.51 | 0.299075 | -1.888008295 | 0.159833 |
| 753.5   | 745.5   | 0.937808 | -0.107283454 | 0.946999 |
| 1082    | 1128.5  | 0.932018 | -0.174850162 | 0.90658  |
| 538.5   | 571     | 0.859575 | -0.319585785 | 0.817955 |
| 28      | 79      | 0.799823 | -1.106915204 | 0.310126 |
| 197.5   | 218     | 0.973091 | 0.067778114  | 0.968845 |
| 648.5   | 560     | 0.822515 | -0.363682841 | 0.930445 |
| 1552.5  | 1265    | 0.576148 | -0.509603498 | 0.828519 |
| 11.5    | 15.5    | 0.93922  | 0.120294234  | 0.819842 |
| 1196    | 1179    | 0.816352 | -0.406218552 | 0.826716 |
| 2337.5  | 2420    | 0.770496 | -0.440462382 | 0.74132  |
| 239.5   | 260     | 0.938853 | 0.135037144  | 0.992182 |
| 51      | 46      | 0.711121 | -0.741688004 | 0.778268 |
| 271.5   | 247.5   | 0.492464 | -1.78102764  | 0.543941 |
| 8908.52 | 8356.24 | 0.865835 | -0.31692376  | 0.907645 |
| 995     | 717.5   | 0.688255 | -0.383959188 | 0.937181 |
| 591.501 | 370.5   | 0.765362 | 0.390736872  | 0.524028 |
| 448     | 323.5   | 0.65056  | -0.688413849 | 0.901739 |
| 1594    | 1512    | 0.722359 | -0.4461431   | 0.773511 |
| 122     | 106     | 0.713261 | -0.582009183 | 0.822669 |
| 0       | 0.5     | 0.450185 | #DIV/0!      | 1        |
| 15.5    | 148.5   | 0.991648 | 0.090197809  | 0.230657 |
| 146.5   | 147.5   | 0.488374 | -1.909354636 | 0.484688 |
| 21      | 52.5    | 0.805129 | 0.63005039   | 0.671418 |
| 1331.51 | 1052    | 0.698496 | -0.804254021 | 0.842133 |
| 1663.5  | 1799.5  | 0.345118 | -1.081620649 | 0.287192 |
| 2414.5  | 1943.5  | 0.707121 | -0.418926571 | 0.931472 |
| 530.999 | 598     | 0.969212 | -0.06246137  | 0.878232 |
| 188.5   | 189.5   | 0.969339 | 0.074574484  | 0.972403 |
| 2150.5  | 2271.5  | 0.818747 | -0.375663261 | 0.775931 |
| 1485    | 1633.5  | 0.840677 | -0.38967854  | 0.775761 |
| 0       | 0       | ?        | #DIV/0!      | ?        |
| 3147.5  | 3264.05 | 0.841703 | -0.347944138 | 0.815067 |
| 919.5   | 914.5   | 0.82893  | -0.331965302 | 0.83335  |
| 11525.9 | 12825.9 | 0.49144  | -1.461417866 | 0.425393 |
| 1783    | 1766    | 0.87821  | -0.233561205 | 0.885893 |
| 3462.5  | 3331.5  | 0.875312 | -0.198221265 | 0.911775 |
| 1590    | 774     | 0.456287 | -1.17948383  | 0.949205 |
| 0.5     | 1       | 0.622002 | 1            | 1        |
| 1318    | 1596    | 0.929854 | -0.11562591  | 0.744397 |
| 1677.5  | 1669    | 0.74642  | -0.671122452 | 0.749694 |
| 1985.01 | 2160.99 | 0.91231  | -0.18015997  | 0.847093 |
| 2611.49 | 2592.52 | 0.888196 | -0.250343358 | 0.893246 |
| 2       | 1.5     | 1        | 0            | 0.834708 |
| 165.5   | 220.5   | 0.950805 | -0.066906659 | 0.615629 |
| 202.5   | 138.5   | 0.466988 | -0.989352756 | 0.782542 |
| 18.5    | 12      | 0.462019 | -0.209453366 | 0.271022 |
| 44.5    | 63      | 0.655004 | 0.907972589  | 0.811798 |
| 219.5   | 457     | 0.569414 | 0.764954691  | 0.750431 |
| 0       | 0       | ?        | #DIV/0!      | ?        |
| 14      | 14      | 0.569269 | -1           | 0.569269 |
| 4.5     | 3.5     | 0.606453 | -1.169925001 | 0.753462 |

|         |         |           |              |           |
|---------|---------|-----------|--------------|-----------|
| 591.501 | 529.999 | 0.913029  | -0.146185261 | 0.993109  |
| 2618    | 2140.5  | 0.625952  | -0.487356854 | 0.856506  |
| 1171    | 1195.5  | 0.84046   | -0.300982544 | 0.823168  |
| 671.5   | 655.5   | 0.736321  | -0.444337315 | 0.758826  |
| 7213.72 | 7362.82 | 0.479496  | -0.70802939  | 0.458571  |
| 1836    | 1624    | 0.374099  | -1.361560142 | 0.460259  |
| 26249.9 | 28336.8 | 0.893712  | -0.230398453 | 0.837495  |
| 5181    | 5450    | 0.794319  | -0.41791778  | 0.753812  |
| 254     | 412     | 0.85543   | -0.388771845 | 0.523132  |
| 0       | 0       | ?         | #DIV/0!      | ?         |
| 2.5     | 3       | 0.888898  | 0.263034406  | 1         |
| 20.5    | 37      | 0.836936  | -0.270089163 | 0.290033  |
| 66      | 99.5    | 0.834276  | -0.520832163 | 0.584962  |
| 787.5   | 756     | 0.849897  | -0.320783553 | 0.879609  |
| 4782.08 | 4370.81 | 0.605258  | -0.717610996 | 0.68373   |
| 590.376 | 480.281 | 0.732352  | -0.74810528  | 0.852577  |
| 1003    | 987.492 | 0.707985  | -0.905373902 | 0.717016  |
| 207.122 | 146.22  | 0.836473  | -0.399716242 | 0.964454  |
| 6438.92 | 6543.71 | 0.834387  | -0.342819732 | 0.821965  |
| 3223.97 | 3270.54 | 0.840078  | -0.318969863 | 0.828704  |
| 3180.48 | 3104.49 | 0.605816  | -0.760047451 | 0.626045  |
| 3590.19 | 3645.37 | 0.612829  | -0.591886783 | 0.597504  |
| 4470    | 4178.5  | 0.699848  | -0.533835695 | 0.759721  |
| 3812.99 | 3798.77 | 0.7438    | -0.492800261 | 0.746926  |
| 794.189 | 839.35  | 0.974293  | -0.065321669 | 0.941338  |
| 350     | 388.5   | 0.889069  | -0.293864176 | 0.824232  |
| 637     | 664.5   | 0.7422    | -0.618182036 | 0.712346  |
| 721     | 922     | 0.932637  | 0.172368554  | 0.919451  |
| 572.5   | 555     | 0.979126  | 0.02622019   | 0.944397  |
| 8547.5  | 9071    | 0.0762604 | -0.948195819 | 0.0576897 |
| 1869.5  | 1900    | 0.82367   | -0.415680727 | 0.812503  |
| 6       | 4       | 0.670131  | 0.321928095  | 0.352547  |
| 7488.5  | 7584.5  | 0.379223  | -0.585203339 | 0.363652  |
| 0.5     | 1       | 1         | 0            | 0.651448  |
| 9       | 23      | 1         | 0            | 0.340442  |
| 1031    | 996     | 0.556172  | -0.444726539 | 0.605047  |
| 1508    | 1479    | 0.833857  | -0.269554639 | 0.852246  |
| 3260.47 | 3298.48 | 0.672714  | -0.5383645   | 0.661615  |
| 2270    | 2185    | 0.823512  | -0.336299277 | 0.854681  |
| 876     | 918     | 0.88068   | -0.275937853 | 0.848375  |
| 10051   | 8933.99 | 0.707596  | -0.520871793 | 0.810765  |
| 5388.85 | 6698.35 | 0.912998  | -0.16672363  | 0.727198  |
| 609.5   | 557.5   | 0.92741   | -0.106824168 | 0.985786  |
| 199     | 181.5   | 0.84397   | -0.310195133 | 0.914287  |
| 4700.64 | 4614.55 | 0.794041  | -0.406680933 | 0.808915  |
| 1003    | 945.5   | 0.935562  | -0.13011482  | 0.978364  |
| 1024.5  | 1053.5  | 0.982057  | 0.039585452  | 0.999685  |
| 1767    | 1804    | 0.933468  | -0.133793379 | 0.917818  |
| 1695.5  | 989.5   | 0.617433  | -0.603373757 | 0.911188  |
| 5170    | 5439    | 0.586255  | -0.625787873 | 0.535613  |
| 2377.5  | 2143    | 0.413453  | -0.789489201 | 0.520639  |
| 606.494 | 540.997 | 0.6117    | -1.008340156 | 0.687445  |
| 46      | 37      | 0.906251  | 0.148863386  | 0.74379   |
| 14561.5 | 14995   | 0.815903  | -0.301112036 | 0.78782   |
| 12318.2 | 9939.55 | 0.561574  | -1.004950906 | 0.715723  |
| 23.5    | 45      | 0.69262   | -1.162271429 | 0.331457  |

|         |         |          |              |          |
|---------|---------|----------|--------------|----------|
| 1199.5  | 1163.5  | 0.889273 | 0.216797404  | 0.869046 |
| 52888.2 | 56969.2 | 0.987376 | 0.023675818  | 0.953785 |
| 1207.5  | 1268    | 0.853889 | -0.262676017 | 0.81106  |
| 2849.01 | 2565.51 | 0.60685  | -0.594366263 | 0.713253 |
| 10172.5 | 9675.02 | 0.869993 | -0.278277234 | 0.905921 |
| 3649.89 | 3731.63 | 0.659694 | -0.889701296 | 0.644844 |
| 553.5   | 563     | 0.769684 | -0.386221347 | 0.753671 |
| 3409.5  | 3434.5  | 0.5121   | -0.826576587 | 0.505589 |
| 470.999 | 490.5   | 0.84705  | 0.294104444  | 0.874652 |
| 2757    | 2663    | 0.853783 | -0.27533152  | 0.882109 |
| 2.5     | 2.5     | 0.873517 | -0.321928095 | 0.873517 |
| 1       | 1.5     | 1        | 0            | 0.756486 |
| 4936    | 5275.5  | 0.694541 | -0.51173667  | 0.631485 |
| 10770.2 | 10239.1 | 0.754958 | -0.311241527 | 0.815184 |
| 3108.5  | 3468.5  | 0.780991 | -0.385863307 | 0.680644 |
| 4890.5  | 5847    | 0.849973 | -0.376183008 | 0.728216 |
| 2       | 2       | 0.651448 | -1           | 0.651448 |
| 1916.5  | 2050.5  | 0.853933 | -0.221263699 | 0.78442  |
| 5468.88 | 3890.49 | 0.72371  | -0.336555227 | 0.89006  |
| 761.5   | 823.5   | 0.987406 | -0.021953441 | 0.919719 |
| 173.5   | 243     | 0.636629 | -0.508054515 | 0.306109 |
| 2248    | 2103    | 0.545951 | -0.450554452 | 0.64175  |
| 3581.99 | 3449.94 | 0.772186 | -0.458630845 | 0.80195  |
| 1113    | 1404    | 0.874484 | -0.357855839 | 0.731654 |
| 1470.5  | 1550.5  | 0.859242 | -0.326103771 | 0.822276 |
| 1022.5  | 1020    | 0.488932 | -0.757093796 | 0.491317 |
| 38.5    | 23      | 0.614673 | -0.68182404  | 0.971627 |
| 0.5     | 0       | 0.308068 | #NUM!        | 1        |
| 98      | 97.5    | 0.9587   | -0.091147888 | 0.962137 |
| 1129.5  | 1079.5  | 0.888088 | -0.215914116 | 0.923517 |
| 803     | 794.5   | 0.683204 | -0.522551705 | 0.693362 |
| 2170.5  | 2316    | 0.905009 | -0.205760795 | 0.857768 |
| 1513.98 | 1576    | 0.82574  | -0.338922995 | 0.792761 |
| 3211    | 3343.5  | 0.809614 | -0.4068238   | 0.778845 |
| 2178    | 2568    | 0.90459  | -0.259065504 | 0.803123 |
| 961     | 1105.5  | 0.924066 | -0.189859745 | 0.833022 |
| 3395.71 | 2896.5  | 0.774082 | -0.4682547   | 0.892126 |
| 127.5   | 93.4999 | 0.88421  | 0.150304806  | 0.62484  |
| 1584    | 1303.5  | 0.58533  | -0.524757867 | 0.814867 |
| 5126.5  | 3385    | 0.693449 | -0.662648451 | 0.975237 |
| 1       | 0       | 0.308068 | #NUM!        | 1        |
| 2617    | 2081.5  | 0.559138 | -0.571928697 | 0.821885 |
| 1366    | 1318    | 0.869729 | -0.250206627 | 0.898198 |
| 794.5   | 720     | 0.666038 | -0.578620974 | 0.755228 |
| 518     | 468     | 0.641019 | -0.522952838 | 0.747641 |
| 1607.98 | 1682.49 | 0.632821 | -0.585631077 | 0.588674 |
| 565.5   | 538     | 0.788439 | -0.360385005 | 0.833775 |
| 75.5    | 36      | 0.932774 | -0.109121722 | 0.610731 |
| 28      | 29      | 0.696662 | -0.949373927 | 0.676093 |
| 1919    | 2096.5  | 0.773658 | -0.556857767 | 0.712292 |
| 668.501 | 628.996 | 0.975672 | 0.052953682  | 0.937307 |
| 21      | 23      | 0.363033 | -0.932885804 | 0.289299 |
| 1207.49 | 2502.5  | 0.859814 | -0.285055735 | 0.272025 |
| 1210.5  | 993     | 0.361475 | -0.822480633 | 0.573425 |
| 3       | 1       | 0.87225  | -0.263034406 | 0.635978 |
| 1       | 0.5     | 0.651448 | -1           | 1        |

|         |         |          |              |          |
|---------|---------|----------|--------------|----------|
| 119.5   | 113     | 0.96267  | -0.080687846 | 1        |
| 9.5     | 15      | 0.813581 | 0.506959989  | 0.929216 |
| 94      | 100.5   | 0.629621 | -1.046794211 | 0.586729 |
| 1458    | 1228    | 0.752514 | -0.47154187  | 0.890266 |
| 145.5   | 135     | 0.962071 | 0.053529396  | 0.890147 |
| 3120.5  | 2722    | 0.22634  | -0.595984793 | 0.414345 |
| 4263.57 | 3941.13 | 0.391458 | -0.687414911 | 0.482401 |
| 942.5   | 869.5   | 0.657789 | -0.604224403 | 0.729912 |
| 1155.43 | 1056.21 | 0.723699 | -0.443307613 | 0.810091 |
| 3310.5  | 3053    | 0.509674 | -0.87465071  | 0.579993 |
| 691.499 | 622.001 | 0.711016 | -0.580273799 | 0.795032 |
| 1146.5  | 1198    | 0.865009 | -0.259138794 | 0.828925 |
| 595     | 598     | 0.587598 | -0.535507446 | 0.581872 |
| 18      | 20      | 0.621335 | -1.169925001 | 0.557195 |
| 56      | 65      | 0.847    | -0.315501826 | 0.72783  |
| 3787.97 | 3796.94 | 0.301405 | -0.939922924 | 0.299445 |
| 5127.5  | 5788.5  | 0.863784 | -0.296479389 | 0.772491 |
| 3604.5  | 3708    | 0.755238 | -0.689201603 | 0.737753 |
| 3102.09 | 2481.06 | 0.491718 | -1.175887903 | 0.651105 |
| 579     | 560     | 0.784301 | -0.553538048 | 0.805783 |
| 652     | 758.5   | 0.975252 | -0.061015775 | 0.87835  |
| 24      | 35.5    | 0.792544 | 0.297680549  | 0.774446 |
| 156     | 125     | 0.134267 | -1.187370136 | 0.279652 |
| 0       | 0       | ?        | #DIV/0!      | ?        |
| 7.5     | 2.5     | 0.606982 | -1.055835214 | 0.880909 |
| 16.5    | 11.5    | 0.510681 | -1.343954401 | 0.734507 |
| 1596    | 1533.5  | 0.877001 | -0.233508454 | 0.908975 |
| 202     | 195     | 0.330162 | -0.857311583 | 0.363137 |
| 1253.44 | 935.048 | 0.536508 | -0.92748346  | 0.767768 |
| 24.5    | 130.5   | 0.774611 | 1.029146346  | 0.395632 |
| 1041.5  | 980.5   | 0.45504  | -1.864575787 | 0.488899 |
| 562.941 | 159.037 | 0.333882 | 1.740083691  | 0.230313 |
| 681.5   | 492     | 0.834512 | -0.215353154 | 0.833656 |
| 1482    | 1621.5  | 0.852779 | -0.303910044 | 0.78222  |
| 30.5    | 42.5    | 0.804403 | -0.645335119 | 0.611364 |
| 2.05451 | 0.8257  | 0.156889 | -26.81446036 | 0.505079 |
| 8.5     | 20.5    | 0.960496 | -0.180572246 | 0.534842 |
| 450     | 467.5   | 0.893569 | -0.212010403 | 0.863696 |
| 8.44549 | 12.1743 | 0.997127 | 0.009281712  | 0.809268 |
| 1365.69 | 1240.31 | 0.916428 | -0.168733099 | 0.9859   |
| 160     | 214.5   | 0.933482 | 0.161887682  | 0.876276 |
| 86.5    | 90      | 0.966292 | -0.085900073 | 0.942746 |
| 425     | 465.5   | 0.718582 | -0.514573173 | 0.637885 |
| 40      | 35.5    | 0.680597 | -0.391190757 | 0.826502 |
| 0       | 3       | 0.034897 | #DIV/0!      | 1        |
| 360.5   | 326.5   | 0.85326  | -0.274686929 | 0.932612 |
| 1.5     | 3       | 0.78878  | 0.736965594  | 0.892901 |
| 21.5    | 37      | 0.798622 | -0.472068444 | 0.391635 |
| 2734    | 3208.5  | 0.503763 | -1.330661303 | 0.401101 |
| 0       | 0       | ?        | #DIV/0!      | ?        |
| 12      | 6.5     | 0.665956 | -0.678071905 | 0.922273 |
| 1057.5  | 1017    | 0.727582 | -0.536666944 | 0.759449 |
| 23.5    | 23      | 0.950573 | 0.11783649   | 0.938251 |
| 1.5     | 3       | 0.710482 | -0.584962501 | 0.200976 |
| 159986  | 155040  | 0.66196  | -0.741030754 | 0.685754 |
| 724.502 | 712.5   | 0.718385 | -0.580493007 | 0.731605 |

|         |         |           |              |           |
|---------|---------|-----------|--------------|-----------|
| 478.001 | 599.997 | 0.767857  | -0.645836534 | 0.619687  |
| 15      | 18.5    | 0.733666  | -0.819427754 | 0.605889  |
| 10      | 4.5     | 0.698091  | -0.234465254 | 0.337423  |
| 175.5   | 136.5   | 0.151909  | 1.575339916  | 0.123482  |
| 259.5   | 327     | 0.897204  | -0.177240385 | 0.679077  |
| 380     | 350     | 0.706976  | -0.633217669 | 0.768816  |
| 302.061 | 309.851 | 0.895813  | -0.223007883 | 0.877268  |
| 9.5     | 8.5     | 0.617054  | -1.440572591 | 0.674729  |
| 381.5   | 364     | 0.719342  | -0.459195286 | 0.764181  |
| 374     | 360     | 0.70833   | -0.41246814  | 0.749765  |
| 176.5   | 151.5   | 0.741394  | -0.413675824 | 0.88573   |
| 599.003 | 560     | 0.732154  | -0.443424485 | 0.795421  |
| 529.5   | 402     | 0.304243  | -0.582920469 | 0.755761  |
| 325     | 280.5   | 0.727051  | -0.455552659 | 0.86182   |
| 204     | 229.5   | 0.822457  | -0.396300937 | 0.734566  |
| 87.5    | 50.5    | 0.921869  | 0.087947699  | 0.47065   |
| 5       | 6       | 0.0405193 | -2.321928095 | 0.0227138 |
| 595.5   | 605     | 0.630612  | -1.243543108 | 0.621619  |
| 258.5   | 280.5   | 0.900757  | -0.193841508 | 0.834788  |
| 881     | 879     | 0.363489  | -0.833171498 | 0.365628  |
| 234.5   | 221.5   | 0.708987  | -0.583425266 | 0.754842  |
| 1585    | 1221    | 0.527705  | -0.509381282 | 0.88132   |
| 537.5   | 503.5   | 0.695207  | -0.552451556 | 0.752364  |
| 156     | 147.5   | 0.910516  | -0.161280907 | 0.956504  |
| 525.5   | 460.5   | 0.603989  | -0.828093588 | 0.706652  |
| 5.5     | 4.5     | 0.777386  | -0.652076697 | 0.886945  |
| 80      | 77      | 0.726318  | -0.722015253 | 0.750976  |
| 4       | 1       | 0.230584  | -2           | 1         |
| 3162.49 | 3025.98 | 0.733542  | -0.61143015  | 0.765213  |
| 215.5   | 325.498 | 0.942021  | 0.170296878  | 0.823821  |
| 1048.5  | 1139.01 | 0.992309  | -0.017999308 | 0.938829  |
| 383.001 | 362     | 0.837389  | -0.340417786 | 0.879211  |
| 1821    | 1855.5  | 0.720424  | -0.777268081 | 0.708587  |
| 1044.5  | 1407    | 0.990584  | 0.023291879  | 0.811442  |
| 464.5   | 833     | 0.877495  | -0.347782133 | 0.487857  |
| 3238.23 | 3923.52 | 0.716161  | -0.834528647 | 0.595373  |
| 333     | 533.5   | 0.758492  | -0.847996907 | 0.485737  |
| 5111.91 | 4110.51 | 0.2364    | -0.700357523 | 0.521302  |
| 1213    | 1389    | 0.781087  | -0.650039231 | 0.699209  |
| 1020    | 1046    | 0.893769  | -0.225333848 | 0.875264  |
| 1575    | 1457    | 0.449769  | -0.705256734 | 0.534905  |
| 1551    | 1417.5  | 0.738189  | -0.428431936 | 0.823076  |
| 254     | 208.5   | 0.76853   | -0.500844653 | 0.908158  |
| 3511    | 2658    | 0.918463  | 0.129599968  | 0.716784  |
| 2561.5  | 2404    | 0.548239  | -0.609816355 | 0.618009  |
| 930.999 | 805.999 | 0.913855  | -0.178760431 | 0.986858  |
| 74.5    | 76      | 0.908198  | -0.185745519 | 0.893031  |
| 39.5    | 27      | 0.497517  | -0.718818247 | 0.891021  |
| 334.5   | 269.5   | 0.994409  | 0.010742381  | 0.850425  |
| 5358.5  | 4630    | 0.516733  | -0.789560989 | 0.653677  |
| 581     | 619     | 0.7877    | -0.417522763 | 0.735335  |
| 449.5   | 464.5   | 0.836935  | -0.265282846 | 0.805469  |
| 3581.5  | 3447    | 0.811969  | -0.38296965  | 0.84157   |
| 5.5     | 8.5     | 0.604887  | 0.862496476  | 0.859964  |
| 6586    | 4676.5  | 0.428961  | -1.828372244 | 0.62426   |
| 776.5   | 800.5   | 0.880059  | -0.249902933 | 0.857112  |

|         |         |           |              |           |
|---------|---------|-----------|--------------|-----------|
| 163     | 146.5   | 0.681932  | -0.627628966 | 0.768369  |
| 5.5     | 6       | 0.0466619 | -3.459431619 | 0.0367468 |
| 6369.41 | 6302.46 | 0.104556  | -1.1158442   | 0.108973  |
| 2724.5  | 2972.5  | 0.695459  | -0.365333828 | 0.586949  |
| 935.5   | 1165.5  | 0.866031  | -0.21943963  | 0.649243  |
| 2831.5  | 2497    | 0.660242  | -0.462428136 | 0.800013  |
| 2239    | 2203    | 0.692369  | -0.56020762  | 0.706612  |
| 888     | 920     | 0.903643  | -0.189862637 | 0.875802  |
| 397     | 410.5   | 0.893317  | -0.183846552 | 0.863411  |
| 725.5   | 772     | 0.903146  | -0.232536478 | 0.862002  |
| 3141.5  | 3266.5  | 0.868563  | -0.286320987 | 0.840068  |
| 3147    | 2915.5  | 0.741673  | -0.423774165 | 0.813772  |
| 337.999 | 269     | 0.780399  | -0.412190481 | 0.960007  |
| 813     | 800     | 0.799581  | -0.403842342 | 0.812312  |
| 1362.5  | 1214    | 0.790647  | -0.402211897 | 0.882948  |
| 1068    | 1157.5  | 0.946803  | -0.104319774 | 0.883417  |
| 3101    | 3266.5  | 0.829154  | -0.405608592 | 0.793151  |
| 2333    | 1296.5  | 0.684318  | -0.604417662 | 0.902157  |
| 6043.4  | 5440.18 | 0.950005  | -0.111397655 | 0.982824  |
| 16      | 163     | 0.950515  | -0.830074999 | 0.234836  |
| 9600.24 | 8906.28 | 0.870163  | -0.320651681 | 0.916913  |
| 7       | 16      | 0.764832  | -1.485426827 | 0.398338  |
| 802.503 | 774.499 | 0.858878  | -0.252826698 | 0.889161  |
| 2271    | 2250.5  | 0.724495  | -0.674392044 | 0.730749  |
| 1212    | 1079.99 | 0.842755  | -0.34835622  | 0.921988  |
| 50      | 58.5    | 0.545665  | -1.514573173 | 0.454467  |
| 756     | 853.5   | 0.863771  | -0.349138205 | 0.784594  |
| 311     | 344     | 0.838493  | -0.364891391 | 0.764768  |
| 340     | 348.5   | 0.936674  | -0.126302583 | 0.91788   |
| 649.003 | 1008    | 0.990415  | -0.02127402  | 0.647812  |
| 337.5   | 401     | 0.969104  | -0.065588342 | 0.839963  |
| 1151.5  | 1153.5  | 0.871899  | -0.208572701 | 0.870269  |
| 195.5   | 194.5   | 0.853656  | -0.330254027 | 0.857253  |
| 3145    | 3127.5  | 0.558687  | -0.563900885 | 0.565058  |
| 2       | 10.5    | 0.724378  | 1.459431619  | 0.61863   |
| 1147    | 1205    | 0.760976  | -0.390510469 | 0.713199  |
| 1561    | 1155    | 0.342067  | -0.968009886 | 0.63474   |
| 4416.5  | 4122.5  | 0.669031  | -0.703280374 | 0.722111  |
| 1848.5  | 1884    | 0.45166   | -0.744922253 | 0.432638  |
| 4398.5  | 3762    | 0.0484904 | -1.027985436 | 0.104273  |
| 1541.5  | 1610    | 0.816815  | -0.389833569 | 0.783665  |
| 291     | 295.5   | 0.924992  | -0.129592907 | 0.911571  |
| 412.5   | 496.5   | 0.819721  | -0.412125904 | 0.681743  |
| 781     | 717     | 0.710619  | -0.50589093  | 0.787238  |
| 738.5   | 764.5   | 0.66872   | -0.711470488 | 0.641849  |
| 3066.59 | 3612.35 | 0.654838  | -1.244797675 | 0.563793  |
| 1778.52 | 1620.98 | 0.561732  | -0.494416665 | 0.681996  |
| 3946    | 3945    | 0.791297  | -0.414550102 | 0.791501  |
| 987.506 | 895.007 | 0.573693  | -1.18775752  | 0.63628   |
| 11511.5 | 11372.1 | 0.705985  | -0.537532071 | 0.716653  |
| 1209.5  | 1298.01 | 0.897114  | -0.21574793  | 0.843815  |
| 3       | 8       | 0.844837  | 0.584962501  | 0.653035  |
| 1641    | 1748.5  | 0.95421   | -0.094458074 | 0.90713   |
| 1095.5  | 1090.5  | 0.685276  | -0.691168764 | 0.688744  |
| 728     | 844     | 0.79274   | -0.577057303 | 0.698935  |
| 19      | 22.5    | 0.465798  | -0.724365557 | 0.308893  |

|         |         |          |              |          |
|---------|---------|----------|--------------|----------|
| 12157.8 | 11684.4 | 0.80688  | -0.299810411 | 0.846076 |
| 1326.8  | 1521.17 | 0.768041 | -0.49278495  | 0.660109 |
| 1444.98 | 1235    | 0.549086 | -0.636583288 | 0.716635 |
| 2550.5  | 2846.5  | 0.696552 | -0.50118109  | 0.5912   |
| 4404.52 | 3795.84 | 0.730673 | -0.419832036 | 0.875067 |
| 1089    | 1067.5  | 0.720589 | -0.504765298 | 0.738175 |
| 784.5   | 728     | 0.701653 | -0.600214585 | 0.761428 |
| 14795.5 | 14281   | 0.857039 | -0.304349917 | 0.882849 |
| 1183    | 1156    | 0.781676 | -0.415444064 | 0.800906 |
| 11326   | 11309.6 | 0.754778 | -0.460435715 | 0.756017 |
| 852.998 | 873.497 | 0.797933 | -0.415600256 | 0.77928  |
| 4514.16 | 4788.56 | 0.633484 | -0.621018405 | 0.578667 |
| 750     | 625.5   | 0.76856  | -0.372081934 | 0.936238 |
| 1196.5  | 1342.5  | 0.929749 | -0.174756132 | 0.855569 |
| 2617.04 | 2630.4  | 0.772735 | -0.444929865 | 0.768557 |
| 428.5   | 442.5   | 0.351199 | -1.150694357 | 0.327617 |
| 1210.5  | 1330.5  | 0.898488 | -0.214172479 | 0.826975 |
| 21968.4 | 23816.5 | 0.881601 | -0.257418626 | 0.821978 |
| 0       | 0       | 0.308068 | #DIV/0!      | 0.308068 |
| 3226.5  | 3110    | 0.607272 | -0.628885105 | 0.642905 |
| 5346.01 | 5633.47 | 0.762668 | -0.434223194 | 0.716575 |
| 5.5     | 3       | 0.923267 | -0.137503524 | 0.703704 |
| 3017.5  | 3160.5  | 0.868296 | -0.291180971 | 0.834837 |
| 1461    | 1473    | 0.699123 | -0.565834188 | 0.6921   |
| 1926.99 | 1840    | 0.630764 | -0.55237283  | 0.678301 |
| 38956   | 38070.9 | 0.729251 | -0.500715174 | 0.74909  |
| 2642.86 | 2402.96 | 0.775427 | -0.432115172 | 0.852398 |
| 1447    | 1313.5  | 0.721121 | -0.487621951 | 0.807454 |
| 680.498 | 662.5   | 0.862491 | -0.250578297 | 0.885029 |
| 486.318 | 492.269 | 0.85945  | -0.269252659 | 0.84953  |
| 505.154 | 508.008 | 0.865038 | -0.268121244 | 0.860612 |
| 4706.39 | 5235.54 | 0.891796 | -0.267636768 | 0.821465 |
| 323.5   | 362.5   | 0.838013 | -0.323601432 | 0.745101 |
| 1108.5  | 987     | 0.61738  | -0.524741908 | 0.745593 |
| 3069.5  | 3101    | 0.737171 | -0.4930139   | 0.728414 |
| 1259    | 1137    | 0.942711 | 0.088877678  | 0.856386 |
| 5       | 30.5    | 1        | 0            | 0.285854 |
| 2945    | 2976    | 0.591782 | -0.611536774 | 0.581156 |
| 4.5     | 2       | 0.838734 | 0.289506617  | 0.494216 |
| 2024    | 2178.5  | 0.845697 | -0.282553857 | 0.781702 |
| 1209.98 | 1282.52 | 0.841399 | -0.392142981 | 0.802611 |
| 242     | 310     | 0.896995 | -0.300477735 | 0.748742 |
| 4432.5  | 4491    | 0.963874 | -0.076357962 | 0.954639 |
| 315     | 335     | 0.849194 | -0.362570079 | 0.807284 |
| 109     | 148     | 0.791435 | -0.428334322 | 0.539003 |
| 250.5   | 185.5   | 0.651201 | -0.711278951 | 0.878137 |
| 952     | 1123    | 0.954884 | -0.121678557 | 0.855821 |
| 835     | 792     | 0.979134 | -0.050996359 | 0.989925 |
| 1630.98 | 1639.52 | 0.749286 | -0.659583337 | 0.7459   |
| 771.498 | 837.506 | 0.635901 | -1.188506583 | 0.587848 |
| 1584.01 | 1287.99 | 0.582706 | -0.524111948 | 0.827731 |
| 366.5   | 374.5   | 0.772357 | -0.5008611   | 0.756222 |
| 313     | 355.5   | 0.899742 | -0.223929656 | 0.807262 |
| 2070.5  | 2077    | 0.900793 | -0.230311019 | 0.8987   |
| 56.5    | 125.5   | 0.825403 | -0.630354404 | 0.362879 |
| 191     | 218     | 0.919042 | -0.159576313 | 0.812032 |

|         |         |          |              |          |
|---------|---------|----------|--------------|----------|
| 12.5    | 13.5    | 0.613399 | -1.184424571 | 0.56643  |
| 862.5   | 889.5   | 0.700738 | -0.52717321  | 0.672745 |
| 5157.5  | 5070    | 0.823542 | -0.304550204 | 0.83892  |
| 471.5   | 524     | 0.77804  | -0.326525109 | 0.665483 |
| 689.998 | 695.997 | 0.82945  | -0.30502715  | 0.821869 |
| 157.017 | 158.004 | 0.503566 | -0.82709968  | 0.497939 |
| 1174    | 1268    | 0.932361 | -0.156926972 | 0.8803   |
| 11.5    | 13.5    | 0.770136 | 0.430634354  | 0.88314  |
| 1170.5  | 1100.5  | 0.498095 | -0.764549046 | 0.558163 |
| 199     | 207.5   | 0.754048 | -0.507341604 | 0.72077  |
| 2348    | 2312.5  | 0.804075 | -0.35486635  | 0.817272 |
| 731.5   | 515.5   | 0.504467 | -1.059386834 | 0.765193 |
| 28      | 14.5    | 0.093986 | -2.485426827 | 0.390811 |
| 66      | 82      | 0.962018 | -0.090197809 | 0.812741 |
| 680     | 687.5   | 0.961346 | -0.071769034 | 0.952576 |
| 3467.5  | 3566.52 | 0.954387 | -0.103939271 | 0.935704 |
| 4478    | 3812    | 0.40911  | -0.732301619 | 0.591084 |
| 2015.48 | 2300    | 0.920347 | -0.205005671 | 0.836849 |
| 133     | 104.5   | 0.564515 | -1.04405518  | 0.731264 |
| 1375.5  | 1440    | 0.903263 | -0.250814742 | 0.87516  |
| 1313.48 | 1376.5  | 0.748008 | -0.68765868  | 0.718114 |
| 65.5    | 115     | 0.960842 | 0.095860015  | 0.630977 |
| 118     | 144     | 0.945264 | -0.161543861 | 0.833149 |
| 204.616 | 206.71  | 0.794311 | -0.552653839 | 0.78794  |
| 401.5   | 364.5   | 0.827314 | -0.442241857 | 0.886786 |
| 3922.46 | 3774.45 | 0.865446 | -0.252605967 | 0.896737 |
| 2415.5  | 2171    | 0.496639 | -0.52343131  | 0.642211 |
| 2480.5  | 2835    | 0.631752 | -0.924923833 | 0.538507 |
| 1175    | 1185    | 0.681336 | -0.636202617 | 0.674395 |
| 867     | 856.5   | 0.821053 | -0.355811047 | 0.830727 |
| 221.5   | 184     | 0.471102 | -0.725073698 | 0.67043  |
| 1695.5  | 1629    | 0.535076 | -0.692008618 | 0.575302 |
| 1663    | 1441    | 0.660975 | -0.619421144 | 0.784155 |
| 185     | 143     | 0.7947   | -0.326810316 | 0.974931 |
| 90.5    | 113     | 0.465245 | -0.855989697 | 0.285048 |
| 1556.5  | 1483    | 0.664239 | -0.380691447 | 0.72789  |
| 641     | 1460    | 0.90799  | -0.315751925 | 0.415672 |
| 2134.5  | 1895    | 0.778347 | -0.265672802 | 0.924851 |
| 579.5   | 615     | 0.846894 | -0.323796468 | 0.801584 |
| 1.5     | 0       | 0.495025 | 0.736965594  | 0.14822  |
| 616     | 460.5   | 0.845877 | -0.218299667 | 0.876617 |
| 1334    | 1361.5  | 0.989669 | 0.021469072  | 0.996126 |
| 6878    | 7376.5  | 0.787057 | -0.421063042 | 0.729393 |
| 1359.5  | 1697    | 0.916309 | -0.223365512 | 0.775609 |
| 12502.2 | 11894.6 | 0.692498 | -0.684200856 | 0.729496 |
| 13.5    | 11      | 0.673177 | -0.754887502 | 0.815909 |
| 2667.49 | 2821.08 | 0.783293 | -0.42672911  | 0.73711  |
| 380.5   | 401.5   | 0.786492 | -0.465844135 | 0.745892 |
| 5228    | 5632.5  | 0.720188 | -0.600499367 | 0.66213  |
| 1419.5  | 1538    | 0.818779 | -0.405750999 | 0.759657 |
| 5692.02 | 5705.17 | 0.789013 | -0.380274495 | 0.786987 |
| 1622    | 1599    | 0.819146 | -0.346710921 | 0.830858 |
| 1512.5  | 1643    | 0.877055 | -0.291256399 | 0.82033  |
| 53.5    | 52.5    | 0.831833 | -0.282035368 | 0.849184 |
| 1730.03 | 1772.52 | 0.796076 | -0.435036512 | 0.77759  |
| 1425    | 1381    | 0.63176  | -0.63204044  | 0.660595 |



|         |         |          |              |           |
|---------|---------|----------|--------------|-----------|
| 933.997 | 1123.99 | 0.928387 | -0.170310056 | 0.800484  |
| 241.5   | 272.499 | 0.909189 | -0.225881407 | 0.830226  |
| 3039.52 | 3358.5  | 0.918934 | -0.212097784 | 0.857527  |
| 3075.17 | 3433.83 | 0.894777 | -0.265819111 | 0.823345  |
| 1393.5  | 1431.5  | 0.823412 | -0.347123518 | 0.801586  |
| 251     | 263     | 0.867731 | -0.240224523 | 0.827399  |
| 2753    | 3357.5  | 0.668111 | -1.053923834 | 0.548465  |
| 8       | 6.5     | 0.563569 | 0.64385619   | 0.451594  |
| 2275.5  | 2268    | 0.860519 | -0.323831387 | 0.862769  |
| 3370.5  | 3699.5  | 0.87833  | -0.314669774 | 0.819095  |
| 1207    | 1254    | 0.772384 | -0.628031223 | 0.748525  |
| 2       | 8       | 0.499897 | 1.584962501  | 0.72755   |
| 1314.5  | 1249    | 0.838791 | -0.318639275 | 0.878753  |
| 1576.5  | 1642    | 0.829973 | -0.327888706 | 0.796317  |
| 1020    | 1087    | 0.879545 | -0.265582587 | 0.833416  |
| 1572.5  | 1522    | 0.791276 | -0.419171957 | 0.817073  |
| 702.5   | 965     | 0.989539 | -0.026947674 | 0.782651  |
| 2027    | 2489    | 0.59453  | -1.221918007 | 0.467174  |
| 6190    | 6362.5  | 0.770787 | -0.385204541 | 0.744923  |
| 470.5   | 467.5   | 0.267977 | -1.70312523  | 0.271527  |
| 176.5   | 289.5   | 0.909517 | -0.229904697 | 0.556247  |
| 2002    | 1591.5  | 0.879478 | -0.173216614 | 0.901892  |
| 2387    | 2650.5  | 0.820052 | -0.409206796 | 0.743351  |
| 953     | 1323.5  | 0.736831 | -0.776094527 | 0.527178  |
| 4730.02 | 4978    | 0.678897 | -0.55435106  | 0.631726  |
| 132     | 111.5   | 0.924469 | 0.174774401  | 0.834882  |
| 0       | 0       | ?        | #DIV/0!      | ?         |
| 2126.5  | 2436    | 0.963632 | -0.085238437 | 0.872168  |
| 1084    | 895.999 | 0.421473 | -1.817706441 | 0.532172  |
| 1704.5  | 1748    | 0.714993 | -0.635785074 | 0.696104  |
| 2063    | 2275.5  | 0.996229 | 0.009410051  | 0.944484  |
| 104     | 150.5   | 0.777646 | -0.700439718 | 0.552     |
| 77.0001 | 92.0001 | 0.906548 | -0.266788414 | 0.801307  |
| 740.5   | 688     | 0.442436 | -1.715372302 | 0.485883  |
| 3452.5  | 3503    | 0.713364 | -0.692054506 | 0.703152  |
| 1175.5  | 1420.5  | 0.846253 | -0.370128996 | 0.712126  |
| 259.5   | 181     | 0.518462 | 1.13901896   | 0.42851   |
| 200.5   | 412.5   | 0.813465 | 0.46628374   | 0.679346  |
| 4337.51 | 2911.48 | 0.439493 | -1.792079518 | 0.665279  |
| 139.5   | 183.5   | 0.703727 | -0.984569959 | 0.542308  |
| 4884.37 | 4836    | 0.56586  | -0.780763467 | 0.574562  |
| 637.5   | 951.5   | 0.681484 | 0.596607804  | 0.987259  |
| 38.6746 | 211.5   | 0.727464 | 1.055550715  | 0.315291  |
| 543     | 527     | 0.798935 | -0.428383525 | 0.82135   |
| 1       | 0       | 0.544016 | 1.321928095  | 0.338084  |
| 28.5    | 33      | 0.759393 | -0.584962501 | 0.655021  |
| 4470.52 | 4314.52 | 0.888107 | -0.250873056 | 0.912394  |
| 6       | 7.5     | 0.757041 | -0.584962501 | 0.594901  |
| 36      | 52      | 0.234161 | -1.710493383 | 0.0928507 |
| 8.5     | 2.5     | 0.824188 | 0.234465254  | 0.312473  |
| 3       | 3       | 0.630057 | 0.736965594  | 0.630057  |
| 765     | 729     | 0.866    | -0.302030863 | 0.899058  |
| 1407.5  | 1621.5  | 0.986651 | -0.035278012 | 0.903004  |
| 2500.31 | 2716.7  | 0.838217 | -0.440379719 | 0.786751  |
| 633     | 785.498 | 0.893392 | -0.249421265 | 0.738109  |
| 233     | 195     | 0.971835 | -0.050404953 | 0.894829  |

|         |         |          |              |          |
|---------|---------|----------|--------------|----------|
| 162.5   | 156     | 0.820027 | -0.310872906 | 0.856452 |
| 740.5   | 688.5   | 0.961349 | 0.086029577  | 0.917359 |
| 400     | 461     | 0.884666 | 0.304511042  | 0.959315 |
| 209     | 219.5   | 0.985092 | 0.037474705  | 0.986447 |
| 413.98  | 444.24  | 0.929091 | -0.178001259 | 0.884831 |
| 445     | 412.999 | 0.936232 | 0.156534785  | 0.896504 |
| 295.5   | 300     | 0.888112 | 0.286841129  | 0.895787 |
| 403.5   | 493     | 0.851363 | 0.370098579  | 0.963789 |
| 3.5     | 3       | 0.419531 | -2.807354922 | 0.493436 |
| 188     | 281.5   | 0.845514 | 0.416954702  | 0.924639 |
| 160.5   | 132     | 0.938789 | 0.095635279  | 0.784131 |
| 277     | 281.5   | 0.975987 | 0.036004953  | 0.991422 |
| 6221.5  | 6140.5  | 0.648963 | -0.552857972 | 0.661924 |
| 5056.69 | 4542.42 | 0.687063 | -0.48278163  | 0.793992 |
| 2040.5  | 1991    | 0.664594 | -0.614787178 | 0.686051 |
| 2425    | 2030    | 0.742161 | -0.389679852 | 0.917523 |
| 4047.5  | 3744    | 0.610253 | -0.566545621 | 0.692154 |
| 1310.03 | 1276.53 | 0.75877  | -0.459834602 | 0.780425 |
| 140     | 117     | 0.983927 | 0.020464103  | 0.802324 |
| 2180.5  | 1834.99 | 0.764192 | -0.360822532 | 0.931594 |
| 271.5   | 296.5   | 0.862743 | -0.310021328 | 0.799215 |
| 264     | 260.5   | 0.680539 | -0.717964632 | 0.690466 |
| 2344.5  | 2132    | 0.65897  | -0.614334912 | 0.742379 |
| 332     | 332     | 0.90649  | -0.175367087 | 0.90649  |
| 1262    | 1048    | 0.816929 | -0.295871646 | 0.984134 |
| 2717    | 2916.5  | 0.891967 | -0.218592016 | 0.836579 |
| 1891    | 1918.5  | 0.732025 | -0.46760853  | 0.71885  |
| 499     | 570.5   | 0.934911 | 0.158637512  | 0.984825 |
| 3400    | 3237.5  | 0.756781 | -0.616600642 | 0.788877 |
| 592.5   | 560     | 0.573176 | -0.718818247 | 0.625311 |
| 2202.03 | 2246.58 | 0.819547 | -0.426423232 | 0.805708 |
| 931     | 780     | 0.470095 | -0.625427397 | 0.686889 |
| 2069.5  | 1805    | 0.480509 | -0.763584123 | 0.618474 |
| 406.047 | 322.909 | 0.518598 | -0.5899382   | 0.794608 |
| 1462.5  | 1361.5  | 0.703788 | -0.557844752 | 0.764255 |
| 551     | 443     | 0.747093 | -0.421159888 | 0.941404 |
| 14.5    | 16.5    | 0.530195 | -1.050626073 | 0.436125 |
| 509.5   | 454.5   | 0.783998 | -0.349082146 | 0.8909   |
| 974.5   | 942.5   | 0.803401 | -0.376810114 | 0.830769 |
| 6233.5  | 6061    | 0.886357 | -0.229837034 | 0.907544 |
| 299     | 279     | 0.387555 | -0.957215134 | 0.448653 |
| 749     | 704.5   | 0.713981 | -0.686184551 | 0.756473 |
| 64      | 113     | 0.798692 | -0.790546634 | 0.490221 |
| 3923    | 2759    | 0.435989 | -1.870307259 | 0.632569 |
| 6486.43 | 6499.77 | 0.810495 | -0.425595642 | 0.809016 |
| 3368.5  | 2931.5  | 0.620688 | -0.601871591 | 0.75576  |
| 2223    | 2321.5  | 0.462422 | -0.630954618 | 0.414189 |
| 75.5    | 72.5    | 0.91194  | -0.183122304 | 0.941189 |
| 2673    | 2084    | 0.786624 | -0.266925696 | 0.933882 |
| 440.5   | 345.5   | 0.88037  | -0.159116719 | 0.872669 |
| 1       | 4       | 0.651448 | 1            | 0.391002 |
| 0.5     | 0.5     | 1        | 0            | 1        |
| 41      | 53      | 0.624491 | -0.657112286 | 0.399974 |
| 260.5   | 271.5   | 0.954021 | 0.083384894  | 0.98664  |
| 2       | 8.5     | 0.805083 | 0.807354922  | 0.435351 |
| 3523    | 3129    | 0.834327 | 0.335054342  | 0.766191 |

|         |         |          |              |          |
|---------|---------|----------|--------------|----------|
| 532.5   | 583     | 0.225907 | -0.782842116 | 0.15922  |
| 3108.91 | 3255.11 | 0.590842 | -1.222284147 | 0.56242  |
| 5147.84 | 4949.83 | 0.748787 | -0.519211995 | 0.779378 |
| 3325    | 3434.5  | 0.985596 | -0.031144523 | 0.963402 |
| 11267.3 | 9693.44 | 0.802704 | -0.41808215  | 0.911095 |
| 4299.89 | 4509.98 | 0.853492 | -0.312277366 | 0.817623 |
| 5668.5  | 5266    | 0.497975 | -0.713446416 | 0.57404  |
| 0.5     | 3       | 0.504632 | 2.321928095  | 0.862169 |
| 2116.5  | 2178    | 0.528381 | -0.608153311 | 0.496834 |
| 1008.5  | 967.5   | 0.762465 | -0.470200728 | 0.795889 |
| 414     | 406     | 0.711667 | -0.498730103 | 0.729534 |
| 3607.5  | 4239.32 | 0.985473 | 0.034317253  | 0.909134 |
| 271     | 507     | 0.971112 | -0.087795604 | 0.579656 |
| 1982.5  | 1978    | 0.593625 | -1.238001141 | 0.595006 |
| 20.5    | 22.5    | 0.810693 | -0.403355694 | 0.738666 |
| 3449.5  | 2961    | 0.719181 | -0.796521638 | 0.809421 |
| 572.502 | 677.502 | 0.759855 | -0.75599546  | 0.660713 |
| 695.5   | 755.497 | 0.947807 | 0.134573863  | 0.993852 |
| 8811.74 | 9823.74 | 0.823881 | -0.433705528 | 0.749428 |
| 85.5001 | 220.5   | 0.993333 | 0.025090952  | 0.478603 |
| 1243    | 1385.5  | 0.983643 | -0.040608823 | 0.916313 |
| 1137.5  | 1288.5  | 0.394377 | -0.7744403   | 0.281819 |
| 2328.5  | 1708.5  | 0.465442 | -1.04307811  | 0.714218 |
| 939     | 590     | 0.403434 | -0.972606233 | 0.829367 |
| 123     | 167.5   | 0.870364 | -0.395620045 | 0.68617  |
| 121     | 137.5   | 0.888716 | 0.230883882  | 0.976037 |
| 355     | 324     | 0.743002 | -0.446535652 | 0.82466  |
| 948.5   | 914     | 0.709682 | -0.436233329 | 0.747853 |
| 542     | 597.5   | 0.840847 | -0.313964717 | 0.760804 |
| 1306    | 1424.5  | 0.835692 | -0.435059803 | 0.780421 |
| 1538    | 1619    | 0.931621 | -0.17004226  | 0.899457 |
| 2220    | 2186.5  | 0.863256 | -0.366742655 | 0.872321 |
| 3182.5  | 3166.5  | 0.830803 | -0.303628469 | 0.835183 |
| 1854    | 1586    | 0.575124 | -0.35210308  | 0.848204 |
| 35.5    | 33      | 0.268218 | -1.342392197 | 0.316908 |
| 1.5     | 2       | 0.670131 | 1            | 0.774348 |
| 1600    | 1444    | 0.660439 | -0.611121661 | 0.750442 |
| 289     | 303.5   | 0.533599 | -1.808603468 | 0.507408 |
| 865     | 866     | 0.780671 | -0.41670632  | 0.7797   |
| 993.502 | 1025    | 0.509924 | -0.716780532 | 0.479133 |
| 419.5   | 412.5   | 0.637578 | -0.383852073 | 0.660892 |
| 911     | 880     | 0.569169 | -0.501510906 | 0.612439 |
| 599     | 568.5   | 0.69259  | -0.493396871 | 0.743379 |
| 2123    | 1850.5  | 0.447105 | -0.693237455 | 0.603179 |
| 2419.52 | 2888    | 0.672421 | -1.049445935 | 0.566705 |
| 97      | 147.5   | 0.980963 | 0.051138849  | 0.750955 |
| 363     | 352     | 0.984609 | 0.033392663  | 0.964705 |
| 3041.5  | 3183    | 0.82737  | -0.27910877  | 0.783305 |
| 968     | 1055.5  | 0.835284 | -0.395301281 | 0.775406 |
| 1528.5  | 1685.5  | 0.858445 | -0.329380232 | 0.789398 |
| 0       | 0.5     | 0.353387 | #DIV/0!      | 0.622002 |
| 1577    | 1737.5  | 0.944877 | -0.126612456 | 0.878695 |
| 640     | 756.5   | 0.957789 | -0.102759574 | 0.847397 |
| 1139.5  | 1344.5  | 0.977256 | 0.055877274  | 0.919332 |
| 1126    | 1040.5  | 0.494732 | -0.650156091 | 0.583261 |
| 648.5   | 860.5   | 0.738452 | -0.619863576 | 0.529378 |

|         |         |          |              |          |
|---------|---------|----------|--------------|----------|
| 16      | 44.5    | 1        | 0            | 0.294648 |
| 27585.6 | 28091.5 | 0.555418 | -1.215842066 | 0.543586 |
| 29310.5 | 26778.3 | 0.378559 | -1.163591862 | 0.448443 |
| 8336.98 | 5931.44 | 0.271869 | -1.842908598 | 0.479381 |
| 2363    | 2472    | 0.727611 | -0.446931793 | 0.684092 |
| 4       | 3       | 0.785812 | -0.415037499 | 1        |
| 492.5   | 461.5   | 0.863634 | -0.217761755 | 0.924496 |
| 13.5    | 19      | 0.661471 | -1.584962501 | 0.492324 |
| 4.5     | 3.5     | 1        | 0            | 0.866407 |
| 2583.98 | 2605.45 | 0.400237 | -0.663829276 | 0.391029 |
| 2102.5  | 2253.5  | 0.719904 | -0.4871433   | 0.655988 |
| 1.5     | 4.5     | 1        | 0            | 0.409302 |
| 1638.5  | 1703.5  | 0.808111 | -0.432607251 | 0.779831 |
| 1082.5  | 932.5   | 0.438265 | -1.958617792 | 0.520719 |
| 120.5   | 69.5    | 0.675204 | 0.637857449  | 0.474979 |
| 440     | 399.5   | 0.682282 | -0.917173569 | 0.740573 |
| 112     | 303.001 | 0.969619 | 0.111508315  | 0.464467 |
| 622     | 979     | 0.882115 | -0.248725043 | 0.509873 |
| 1300    | 1237    | 0.710415 | -0.463181947 | 0.758802 |
| 0       | 0       | ?        | #DIV/0!      | ?        |
| 898     | 793     | 0.955719 | 0.09481537   | 0.880117 |
| 854.5   | 613     | 0.827377 | -0.390208527 | 0.966354 |
| 2613    | 2311    | 0.717024 | 0.600521756  | 0.659284 |
| 1461    | 1300.5  | 0.732503 | -0.425277622 | 0.844464 |
| 1357    | 1151.5  | 0.864738 | 0.292499661  | 0.776623 |
| 9486.19 | 10890.9 | 0.761456 | -0.716265153 | 0.677968 |
| 29900.5 | 26317   | 0.656829 | -0.546235698 | 0.780597 |
| 1229.5  | 1155.5  | 0.892594 | -0.248440967 | 0.933262 |
| 1382    | 1212.5  | 0.675768 | -0.528660055 | 0.799713 |
| 0.5     | 0       | 0.308068 | #NUM!        | 1        |
| 568.5   | 757.5   | 0.868947 | -0.296148156 | 0.650687 |
| 2191    | 2060    | 0.842813 | -0.3698787   | 0.883826 |
| 496.499 | 538.999 | 0.759938 | -0.563325285 | 0.700634 |
| 1646.5  | 1434.5  | 0.530879 | -0.90957487  | 0.644034 |
| 239.5   | 247     | 0.986875 | -0.027364899 | 0.965015 |
| 272     | 270.5   | 0.771956 | -0.359542387 | 0.777421 |
| 855     | 959.5   | 0.904153 | -0.178492665 | 0.805833 |
| 99.5    | 115     | 0.984108 | 0.035800721  | 0.917578 |
| 6136.5  | 5538    | 0.639016 | -0.625372762 | 0.732068 |
| 2420.5  | 2016.99 | 0.363621 | -0.696598197 | 0.588802 |
| 4.5     | 7       | 0.739529 | 0.736965594  | 0.955355 |
| 2       | 1       | 0.866773 | 0.321928095  | 0.622002 |
| 2       | 0.5     | 0.474021 | -1           | 0.710482 |
| 1228.52 | 1194.51 | 0.692437 | -0.586741542 | 0.716139 |
| 649     | 575     | 0.839419 | -0.26392386  | 0.948445 |
| 965.5   | 955     | 0.692636 | -0.535754082 | 0.702605 |
| 359.5   | 355     | 0.632192 | -0.656957946 | 0.643419 |
| 567.592 | 642.711 | 0.67457  | -0.588928042 | 0.564004 |
| 337     | 492     | 0.836407 | -0.402251344 | 0.561793 |
| 185.5   | 166.5   | 0.858832 | -0.311273702 | 0.932908 |
| 873     | 691     | 0.567639 | -0.568939239 | 0.832444 |
| 0.5     | 1       | 1        | 0            | 0.651448 |
| 926     | 936     | 0.988304 | -0.019607465 | 0.97895  |
| 313     | 291.5   | 0.71719  | -0.444528796 | 0.787243 |
| 496     | 429.5   | 0.950572 | -0.107138964 | 0.956827 |
| 109.5   | 123.5   | 0.725023 | -0.508000519 | 0.618954 |

|         |         |           |              |           |
|---------|---------|-----------|--------------|-----------|
| 1013.5  | 950     | 0.690414  | -0.454724036 | 0.758184  |
| 1694.5  | 1846.5  | 0.787918  | -0.477530469 | 0.724175  |
| 478     | 378     | 0.16302   | -2.036680663 | 0.275276  |
| 12.5    | 13      | 0.825055  | 0.35614381   | 0.849542  |
| 50.5    | 39.5    | 0.299587  | -1.336283388 | 0.482264  |
| 341.5   | 347     | 0.789403  | -0.382318767 | 0.775423  |
| 409.905 | 532.292 | 0.895777  | -0.221165781 | 0.688674  |
| 111     | 189     | 0.939642  | -0.143364175 | 0.538087  |
| 1366    | 2329    | 0.876099  | -0.304606098 | 0.483257  |
| 432.5   | 585     | 0.879507  | -0.32819615  | 0.682809  |
| 2240.5  | 1742.5  | 0.545341  | -1.235545165 | 0.70458   |
| 2907.48 | 3038.56 | 0.800742  | -0.34537328  | 0.760383  |
| 2904.5  | 2990.5  | 0.812343  | -0.474110567 | 0.793174  |
| 5154.5  | 4803    | 0.61712   | -0.678771801 | 0.68015   |
| 3.5     | 7.5     | 0.896328  | -0.485426827 | 0.52984   |
| 1163.5  | 1211    | 0.810495  | -0.365668525 | 0.777255  |
| 49430   | 51804.6 | 0.80336   | -0.552762469 | 0.774846  |
| 5083.5  | 4983.5  | 0.408386  | -1.586666304 | 0.420733  |
| 5628.14 | 5749.7  | 0.742371  | -0.53478818  | 0.725495  |
| 3278    | 2947.5  | 0.624928  | -0.616554001 | 0.725565  |
| 2032.3  | 1966.71 | 0.713744  | -0.660435907 | 0.737392  |
| 1996.5  | 2098    | 0.958083  | 0.100137725  | 0.987724  |
| 484     | 418.5   | 0.837923  | -0.284052187 | 0.960245  |
| 89.5    | 46.5    | 0.104638  | -0.689399911 | 0.585084  |
| 3309.5  | 3361.5  | 0.486232  | -0.736021398 | 0.470786  |
| 2680    | 2570    | 0.678309  | -0.346015979 | 0.736249  |
| 82.5    | 81      | 0.865259  | -0.206450877 | 0.883411  |
| 2414.5  | 1872    | 0.215767  | -0.835562624 | 0.5001    |
| 189.5   | 185     | 0.857518  | -0.204110264 | 0.882843  |
| 1013.5  | 1166.5  | 0.95464   | -0.114765654 | 0.865979  |
| 675     | 675     | 0.922896  | -0.185639472 | 0.922896  |
| 973.5   | 975     | 0.946626  | -0.124520804 | 0.945634  |
| 1126.51 | 997.001 | 0.731828  | -0.71032737  | 0.80822   |
| 11.5    | 8       | 0.794897  | -0.353636955 | 0.916736  |
| 255.5   | 213.999 | 0.815987  | -0.310678954 | 0.969849  |
| 264.5   | 235.5   | 0.979055  | -0.041499363 | 0.940036  |
| 536.504 | 524.995 | 0.988544  | 0.023977046  | 0.973883  |
| 16.5    | 27.5    | 0.897639  | 0.277533976  | 0.783985  |
| 6.5     | 9.5     | 0.953487  | -0.115477217 | 0.687562  |
| 605.5   | 629.5   | 0.858449  | -0.296539313 | 0.828918  |
| 1       | 1.5     | 0.764931  | -1           | 0.559404  |
| 1184    | 1369    | 0.809902  | -0.473897342 | 0.709949  |
| 13      | 19      | 0.730466  | -0.793549123 | 0.486833  |
| 0       | 0       | ?         | #DIV/0!      | ?         |
| 158.5   | 175.5   | 0.724685  | -0.816485934 | 0.662253  |
| 19      | 19      | 0.920783  | -0.160464672 | 0.920783  |
| 2423    | 1319.5  | 0.908014  | -0.1774992   | 0.737014  |
| 2991.51 | 2972.49 | 0.748485  | -0.39849304  | 0.754778  |
| 624.5   | 695     | 0.882589  | -0.262803408 | 0.805001  |
| 1.5     | 2.5     | 0.0805096 | #NUM!        | 0.0227138 |
| 2288    | 2327    | 0.594809  | -0.691267657 | 0.579317  |
| 246     | 236     | 0.951723  | -0.109624491 | 0.978525  |
| 0.5     | 0       | 0.308068  | #NUM!        | 1         |
| 0       | 2       | 1         | #DIV/0!      | 0.0917211 |
| 498.501 | 435.5   | 0.671729  | -0.493847038 | 0.808932  |
| 991     | 973     | 0.867475  | -0.305282821 | 0.879939  |

|         |         |          |              |          |
|---------|---------|----------|--------------|----------|
| 35.5    | 36.5    | 0.881018 | 0.190102883  | 0.904614 |
| 7.5     | 18.5    | 0.805947 | 0.552541023  | 0.605784 |
| 7       | 10      | 0.637318 | 1            | 0.784667 |
| 1229.5  | 1533.98 | 0.964516 | -0.090178883 | 0.821792 |
| 4631    | 4434    | 0.808567 | -0.335150643 | 0.846996 |
| 40      | 30.5    | 0.939442 | -0.112474729 | 0.869517 |
| 6       | 4       | 0.829521 | -0.415037499 | 0.942559 |
| 5524.17 | 6730.96 | 0.831603 | -0.525733834 | 0.717514 |
| 29.5    | 54      | 0.947948 | 0.139724764  | 0.64643  |
| 5.5     | 2.5     | 0.548832 | -1.459431619 | 0.92941  |
| 14      | 14      | 0.852323 | -0.222392421 | 0.852323 |
| 0       | 0       | ?        | #DIV/0!      | ?        |
| 782.5   | 692     | 0.725895 | -0.543168664 | 0.823609 |
| 5531.5  | 5299    | 0.619353 | -0.676481814 | 0.657671 |
| 3       | 2.5     | 0.463813 | 1            | 0.400619 |
| 165.484 | 156.985 | 0.9099   | -0.125042755 | 0.965539 |
| 13      | 11      | 1        | 0            | 0.903569 |
| 9       | 9.5     | 0.715723 | -0.469485283 | 0.663808 |
| 931     | 919.5   | 0.989102 | -0.019501446 | 0.999128 |
| 42.5    | 33.5    | 0.465838 | -0.983126181 | 0.6665   |
| 17.5    | 26      | 0.776769 | -0.605721061 | 0.508005 |
| 338.5   | 346.999 | 0.80461  | 0.468893214  | 0.817018 |
| 24      | 24      | 0.378416 | -1.678071905 | 0.378416 |
| 782     | 733     | 0.706574 | -0.629457515 | 0.755737 |
| 327.076 | 379.981 | 0.648316 | -1.062689099 | 0.55544  |
| 62      | 51.5    | 0.686199 | -0.561878888 | 0.845998 |
| 18.6306 | 7.75471 | 0.798398 | -0.376995432 | 0.696733 |
| 3       | 1.5     | 0.825659 | -0.263034406 | 0.663808 |
| 961     | 969.5   | 0.432875 | -1.085025381 | 0.426056 |
| 2128.01 | 1868.46 | 0.825703 | -0.428640187 | 0.907567 |
| 90      | 153     | 0.904771 | -0.352301744 | 0.620542 |
| 3540.5  | 3161.5  | 0.525161 | -0.56905678  | 0.663092 |
| 69      | 70.5    | 0.677443 | -0.632791026 | 0.659554 |
| 365.5   | 1228    | 0.797177 | -1.60083826  | 0.293974 |
| 29020.5 | 24306   | 0.729338 | -0.324098455 | 0.946285 |
| 1042.33 | 982.787 | 0.739997 | -0.443373476 | 0.793896 |
| 7.3096  | 5.5     | 0.627053 | -0.699867459 | 0.860006 |
| 0       | 0.5     | 1        | #DIV/0!      | 0.308068 |
| 1461.5  | 1418.5  | 0.791073 | -0.575124788 | 0.80918  |
| 211     | 260     | 0.875148 | -0.328781766 | 0.738828 |
| 384.713 | 181.252 | 0.702124 | -0.192837415 | 0.267455 |
| 19712   | 20455.5 | 0.477209 | -0.42610695  | 0.421188 |
| 0       | 0       | ?        | #DIV/0!      | ?        |
| 0.5     | 1.5     | 0.393741 | 2.584962501  | 0.593125 |
| 0       | 0       | ?        | #DIV/0!      | ?        |
| 6.5     | 16      | 0.833653 | -0.530514717 | 0.279622 |
| 66.5    | 53      | 0.726967 | -0.715432433 | 0.865507 |
| 461     | 469.5   | 0.60116  | -0.761160099 | 0.585761 |
| 2.05601 | 17.8517 | 0.831838 | 0.535106752  | 0.033604 |
| 698.5   | 768     | 0.961063 | -0.091664335 | 0.898499 |
| 367     | 402     | 0.919774 | -0.162084248 | 0.848816 |
| 205.825 | 186.5   | 0.311444 | -2.009616535 | 0.365854 |
| 788     | 443.5   | 0.908447 | 0.070563682  | 0.311283 |
| 2012.5  | 3575.49 | 0.698859 | -0.816176002 | 0.319091 |
| 844.288 | 868.458 | 0.983027 | -0.033414538 | 0.961822 |
| 33      | 53      | 0.955782 | -0.067114196 | 0.451666 |

|         |         |          |              |           |
|---------|---------|----------|--------------|-----------|
| 1526.5  | 1587    | 0.739359 | -0.444154914 | 0.703057  |
| 2.5     | 1.5     | 0.847091 | -0.321928095 | 0.847091  |
| 464     | 303     | 0.646258 | -0.39241459  | 0.831248  |
| 407     | 409.5   | 0.803515 | -0.346956889 | 0.798057  |
| 16.3511 | 25.2306 | 0.790136 | -0.506036167 | 0.470027  |
| 424.5   | 430.5   | 0.958004 | -0.089375807 | 0.948143  |
| 5.5     | 6.5     | 0.466103 | -1.459431619 | 0.36282   |
| 1351.5  | 1369.5  | 0.900209 | 0.252947149  | 0.907094  |
| 5       | 17.5    | 0.851949 | -0.736965594 | 0.237037  |
| 215     | 217     | 0.735875 | -0.548520505 | 0.728575  |
| 791.34  | 1966    | 0.341274 | -1.301185161 | 0.0290033 |
| 897.893 | 883.992 | 0.509312 | -1.914570003 | 0.517592  |
| 13      | 16.5    | 0.57466  | -0.378511623 | 0.266931  |
| 3       | 2       | 0.710482 | -0.584962501 | 1         |
| 50      | 49.5    | 0.936463 | 0.163498732  | 0.931188  |
| 278     | 337.5   | 0.955472 | -0.118941073 | 0.836734  |
| 190.5   | 185     | 0.12373  | -1.164256251 | 0.137567  |
| 2822    | 2664    | 0.429676 | -0.902169438 | 0.481761  |
| 14.1672 | 7.77547 | 0.775546 | 0.295819421  | 0.420886  |
| 0.5     | 1       | 0.710482 | 1            | 1         |
| 17      | 28      | 0.851941 | -0.443606651 | 0.534273  |
| 7.5     | 15      | 0.638531 | -1.099535674 | 0.231264  |
| 1329.5  | 1384    | 0.362985 | -0.600235029 | 0.316569  |
| 214     | 184.5   | 0.938543 | 0.088255749  | 0.806977  |
| 1       | 2       | 0.806588 | -1           | 0.481309  |
| 4       | 4.5     | 0.925659 | -0.192645078 | 0.852323  |
| 2141    | 1571.5  | 0.589493 | -0.817328482 | 0.831567  |
| 662     | 797     | 0.688162 | -1.008743633 | 0.578166  |
| 17      | 34      | 0.953378 | 0.160464672  | 0.666533  |
| 145.5   | 185.5   | 0.842182 | -0.450165723 | 0.69009   |
| 1.5     | 1       | 0.756486 | -0.584962501 | 1         |
| 69      | 45.5    | 0.892126 | 0.158262084  | 0.602247  |
| 51.5    | 46.5    | 0.962296 | 0.068386975  | 0.887414  |
| 112     | 82      | 0.833262 | 0.269460675  | 0.63359   |
| 5.5     | 5.5     | 0.886945 | -0.289506617 | 0.886945  |
| 0       | 0.5     | 0.329316 | #DIV/0!      | 0.495025  |
| 233.5   | 505.002 | 0.854535 | -0.554395784 | 0.422238  |
| 6118.01 | 6299.23 | 0.891264 | -0.275993665 | 0.872994  |
| 28.5033 | 23.0998 | 0.444151 | -1.819548342 | 0.564043  |
| 2583.5  | 2833.5  | 0.613127 | -0.756266777 | 0.536611  |
| 947     | 2171.5  | 0.847272 | -0.616925289 | 0.395404  |
| 4.5     | 5.5     | 0.36282  | #NUM!        | 0.281912  |
| 425     | 491     | 0.834933 | -0.343301746 | 0.720141  |
| 332     | 337.501 | 0.858543 | -0.322471381 | 0.847058  |
| 4375.46 | 4372.42 | 0.62047  | -0.660450037 | 0.621102  |
| 717.515 | 764.56  | 0.955186 | -0.096238334 | 0.909881  |
| 946.499 | 986.498 | 0.743492 | -0.507080971 | 0.70933   |
| 702.5   | 833.5   | 0.768954 | -0.650610543 | 0.659871  |
| 583     | 675     | 0.894569 | -0.256614736 | 0.795151  |
| 4       | 3.5     | 0.290795 | -2           | 0.3646    |
| 1249.5  | 1223    | 0.781122 | -0.490284391 | 0.796662  |
| 264.5   | 230     | 0.641892 | -0.591796692 | 0.77301   |
| 338.108 | 317.459 | 0.771254 | -0.359768795 | 0.832817  |
| 888     | 682     | 0.753085 | -0.325791823 | 0.962615  |
| 641     | 678     | 0.675134 | -0.534646902 | 0.621325  |
| 1062.99 | 981.497 | 0.700653 | -0.458649233 | 0.780949  |

|         |         |          |              |          |
|---------|---------|----------|--------------|----------|
| 2872.52 | 2441.52 | 0.556154 | -1.245510625 | 0.658318 |
| 94.5    | 221     | 0.787617 | -0.918386234 | 0.340131 |
| 475.5   | 604.5   | 0.856743 | -0.373665278 | 0.696061 |
| 2667.5  | 2369    | 0.609584 | -0.553136072 | 0.736893 |
| 1256    | 1150    | 0.721568 | -0.507534424 | 0.797601 |
| 201     | 140     | 0.441826 | -1.356430942 | 0.687262 |
| 123.5   | 162     | 0.594729 | -1.193479729 | 0.424536 |
| 170.5   | 169     | 0.820245 | -0.326165088 | 0.827865 |
| 662.5   | 590.5   | 0.64279  | -0.478475113 | 0.772695 |
| 911     | 932     | 0.790339 | -0.339454147 | 0.768263 |
| 3261.33 | 3365.4  | 0.630204 | -0.470952977 | 0.593446 |
| 931     | 879.5   | 0.818268 | -0.317672925 | 0.868266 |
| 151.5   | 170.5   | 0.910545 | 0.178890783  | 0.995512 |
| 843     | 1047    | 0.892809 | -0.252802483 | 0.737918 |
| 379     | 337.5   | 0.779006 | -0.494591676 | 0.86065  |
| 114     | 95.5    | 0.911714 | -0.189033824 | 0.971541 |
| 0.5     | 1.5     | 0.236154 | 2.321928095  | 0.513713 |
| 369.5   | 374.999 | 0.888622 | 0.196787605  | 0.899865 |
| 1708    | 1762.5  | 0.89663  | -0.22140731  | 0.873723 |
| 5125    | 5346    | 0.773482 | -0.491039611 | 0.741383 |
| 726.5   | 710     | 0.906972 | -0.211347339 | 0.922392 |
| 1147.5  | 1063.5  | 0.894377 | -0.189863848 | 0.956915 |
| 1007    | 1119.5  | 0.915684 | -0.225140982 | 0.851421 |
| 6888    | 6448.5  | 0.335054 | -0.679245305 | 0.411781 |
| 1358.5  | 1051.5  | 0.615544 | -1.03058832  | 0.776019 |
| 9       | 11      | 0.782716 | 0.289506617  | 1        |
| 12      | 25.5    | 0.842547 | -0.415037499 | 0.319545 |
| 72.5    | 75.5    | 0.861406 | -0.249171752 | 0.826061 |
| 1044    | 1351    | 0.760207 | -0.603739708 | 0.578211 |
| 3331.13 | 4667.32 | 0.519665 | -1.985833952 | 0.345191 |
| 613.501 | 566.499 | 0.502062 | -1.725646509 | 0.54675  |
| 1021    | 1219    | 0.925954 | -0.188412229 | 0.811073 |
| 625.498 | 655.004 | 0.855105 | -0.274846572 | 0.816679 |
| 462327  | 411798  | 0.519764 | -0.58964148  | 0.657581 |
| 26137.3 | 18583.4 | 0.373078 | -0.97245105  | 0.696981 |
| 26457   | 22497.5 | 0.612724 | -0.494644483 | 0.802738 |
| 1148    | 1118    | 0.763727 | -0.308481398 | 0.794596 |
| 205663  | 187847  | 0.669901 | -0.479401046 | 0.765467 |
| 992     | 787     | 0.922064 | -0.150065289 | 0.914948 |
| 796     | 737     | 0.859582 | -0.256163555 | 0.923116 |
| 754     | 843.5   | 0.553173 | -0.861453187 | 0.461833 |
| 102.056 | 93.7149 | 0.532296 | -0.70775149  | 0.617348 |
| 49      | 68.5    | 0.929638 | 0.153474481  | 0.822866 |
| 32.5    | 29      | 0.807633 | 0.244418728  | 0.702225 |
| 158.5   | 175     | 0.92112  | 0.175476747  | 0.984571 |
| 521.5   | 440     | 0.966651 | -0.073782195 | 0.928928 |
| 306.5   | 247     | 0.232272 | -1.744043425 | 0.359297 |
| 194     | 212.5   | 0.961725 | 0.0725125    | 0.967461 |
| 425     | 177.5   | 0.940958 | -0.087462841 | 0.525769 |
| 524.5   | 478     | 0.928231 | -0.133932155 | 1        |
| 806.5   | 1105    | 0.94724  | 0.138072586  | 0.859328 |
| 0.5     | 0       | 0.495025 | 1.584962501  | 0.329316 |
| 106.5   | 114.5   | 0.939471 | -0.112659265 | 0.879486 |
| 69      | 82.4999 | 0.918544 | 0.176877762  | 0.959189 |
| 922     | 1146.5  | 0.651482 | -0.53094126  | 0.436591 |
| 1727.5  | 1749.5  | 0.408379 | -0.446836556 | 0.389074 |



|         |         |          |              |          |
|---------|---------|----------|--------------|----------|
| 157.5   | 217     | 0.64823  | -1.345011708 | 0.472364 |
| 5023.91 | 4061.21 | 0.958622 | -0.085339557 | 0.903636 |
| 923.002 | 591.001 | 0.909539 | 0.188742739  | 0.688913 |
| 1946    | 1754.99 | 0.647257 | 0.762172888  | 0.603699 |
| 1034.5  | 1011    | 0.570916 | -1.110836084 | 0.586406 |
| 1493.02 | 1591.98 | 0.884594 | -0.233427714 | 0.834378 |
| 11381.9 | 11697.8 | 0.65511  | -0.593934699 | 0.629878 |
| 123.5   | 240.5   | 0.642437 | -2.14101231  | 0.335377 |
| 870.5   | 904.5   | 0.831957 | -0.2608815   | 0.793548 |
| 1066.5  | 774     | 0.916041 | -0.114688336 | 0.786153 |
| 1897    | 2336.5  | 0.663362 | -0.984116958 | 0.530804 |
| 3588    | 3368.52 | 0.996231 | -0.009067394 | 0.966984 |
| 1505.01 | 1520.5  | 0.891674 | -0.207360355 | 0.883432 |
| 55.5    | 38.5    | 0.467094 | 1.293046975  | 0.388495 |
| 363.499 | 350     | 0.687421 | -0.731020525 | 0.714548 |
| 24.5    | 14      | 0.38777  | -1.807354922 | 0.713857 |
| 4036.5  | 4387    | 0.77566  | -0.57934421  | 0.720207 |
| 8709.5  | 7830    | 0.774226 | -0.456742377 | 0.856397 |
| 292     | 396     | 0.977355 | -0.055398239 | 0.768499 |
| 8.5     | 7       | 0.810062 | 0.371968777  | 0.70295  |
| 360.5   | 351.5   | 0.908018 | -0.178705887 | 0.927632 |
| 8372.11 | 7937.2  | 0.828114 | -0.383137076 | 0.865749 |
| 5299.5  | 5877.5  | 0.752295 | -0.503203779 | 0.667902 |
| 10366   | 9180.97 | 0.503862 | -0.744983475 | 0.625037 |
| 4161.53 | 3543.54 | 0.563691 | -0.612701399 | 0.736386 |
| 1547.5  | 1589.5  | 0.833205 | -0.352549711 | 0.812895 |
| 1724.01 | 1796.5  | 0.734713 | -0.484168791 | 0.698367 |
| 1601.99 | 1656.03 | 0.879211 | -0.25441658  | 0.854411 |
| 360     | 439.5   | 0.953214 | -0.114642566 | 0.820237 |
| 918.5   | 962     | 0.932474 | -0.154011506 | 0.901103 |
| 4085.5  | 4364    | 0.53664  | -0.621800791 | 0.466832 |
| 1791.02 | 1815.47 | 0.632537 | -0.604429662 | 0.619625 |
| 2603.5  | 2700    | 0.681307 | -0.549385896 | 0.647687 |
| 1987    | 2038    | 0.714957 | -0.547515721 | 0.693537 |
| 4120.22 | 4336.04 | 0.857222 | -0.345343414 | 0.822912 |
| 479.5   | 554     | 0.967782 | -0.088403382 | 0.884158 |
| 1307.52 | 1531.96 | 0.955874 | -0.1150727   | 0.858155 |
| 4274.75 | 4235.01 | 0.945221 | -0.128992486 | 0.951163 |
| 4736    | 3970    | 0.580221 | -0.54678499  | 0.782915 |
| 2974.43 | 3354.52 | 0.429481 | -0.651954058 | 0.305992 |
| 11503.5 | 11478   | 0.70046  | -0.419244983 | 0.702899 |
| 13712.5 | 13394.9 | 0.812514 | -0.418334343 | 0.829332 |
| 13142.3 | 11427.8 | 0.692891 | -0.447672555 | 0.838334 |
| 12839   | 10042   | 0.695159 | -0.361615266 | 0.994483 |
| 11887.5 | 11077.5 | 0.449457 | -0.575708026 | 0.540923 |
| 12105.5 | 10087   | 0.518341 | -0.573537093 | 0.74349  |
| 11613.5 | 10267.5 | 0.475343 | -0.611826421 | 0.626144 |
| 1920.5  | 1895    | 0.703739 | -0.477336507 | 0.716751 |
| 23681.8 | 22900   | 0.582203 | -0.524165952 | 0.62175  |
| 9828.91 | 9261.14 | 0.610279 | -0.44033252  | 0.688026 |
| 32446.1 | 25558.2 | 0.629927 | -0.463979145 | 0.910638 |
| 9001.78 | 8675.46 | 0.503275 | -0.688800273 | 0.541911 |
| 3266.5  | 3339.5  | 0.684873 | -0.572867585 | 0.665331 |
| 2540    | 2352    | 0.560039 | -0.646610019 | 0.639236 |
| 215     | 258.5   | 0.9557   | -0.089981367 | 0.810199 |
| 7113.5  | 6811.5  | 0.222844 | -0.696996047 | 0.266166 |

|         |         |          |              |          |
|---------|---------|----------|--------------|----------|
| 1181.5  | 1060.5  | 0.26965  | -0.987235394 | 0.362467 |
| 1221.99 | 1331.01 | 0.884057 | -0.268477835 | 0.824432 |
| 12023   | 11980.5 | 0.821993 | -0.41467756  | 0.824447 |
| 61309.9 | 67247.9 | 0.81672  | -0.457686072 | 0.754272 |
| 8120    | 8801    | 0.887131 | -0.28595755  | 0.835476 |
| 8973    | 8004.37 | 0.736636 | -0.4577454   | 0.838224 |
| 10672.9 | 11026.9 | 0.814944 | -0.365535359 | 0.78847  |
| 7082.64 | 7368.26 | 0.639296 | -0.651630093 | 0.604292 |
| 3511.01 | 3650.7  | 0.810414 | -0.403456834 | 0.780641 |
| 5268.53 | 5274.35 | 0.6397   | -0.537999382 | 0.638562 |
| 1347    | 1425.5  | 0.770231 | -0.486391088 | 0.726119 |
| 3694.5  | 3913.5  | 0.828344 | -0.331281491 | 0.78051  |
| 415     | 380.5   | 0.523427 | -1.317589159 | 0.579027 |
| 11733   | 9791    | 0.422148 | -1.858288429 | 0.526014 |
| 585.999 | 507.499 | 0.948767 | 0.092962604  | 0.846982 |
| 2165    | 2338.5  | 0.881818 | -0.257580479 | 0.82512  |
| 176     | 192.5   | 0.980389 | 0.036423408  | 0.947753 |
| 819.5   | 355.5   | 0.517672 | 0.750283413  | 0.273317 |
| 387     | 528     | 0.902212 | -0.258567854 | 0.696145 |
| 59      | 84      | 0.649971 | -1.673189684 | 0.476012 |
| 2720    | 4067    | 0.807476 | -0.554522553 | 0.545952 |
| 311     | 371.5   | 0.874845 | -0.352992808 | 0.766558 |
| 1683.5  | 1797.33 | 0.879533 | -0.263977372 | 0.831796 |
| 135     | 137.5   | 0.995255 | 0.010647244  | 0.992882 |
| 1670    | 1364.49 | 0.434989 | -1.514570705 | 0.564376 |
| 6000.23 | 6186.15 | 0.784697 | -0.418305571 | 0.759396 |
| 729.5   | 709     | 0.830962 | -0.327128786 | 0.853932 |
| 1098    | 1080    | 0.929546 | -0.143560297 | 0.941702 |
| 2676    | 2942    | 0.834788 | -0.392570159 | 0.768472 |
| 1127.5  | 769.5   | 0.991326 | -0.014144182 | 0.73446  |
| 2893    | 2722.5  | 0.888477 | -0.186886092 | 0.942356 |
| 117.5   | 143     | 0.563108 | -1.628589433 | 0.454939 |
| 1       | 5       | 0.651448 | 1            | 0.230584 |
| 738.5   | 595     | 0.804224 | -0.368582774 | 0.972527 |
| 1485    | 1526.5  | 0.563897 | -0.932620871 | 0.542713 |
| 404.001 | 398     | 0.782793 | -0.483289371 | 0.793719 |
| 64      | 102     | 0.868565 | 0.366322214  | 0.861569 |
| 673.5   | 665.5   | 0.699212 | -0.512891086 | 0.710304 |
| 1449.5  | 1302.03 | 0.660542 | -0.510526539 | 0.770104 |
| 545.5   | 537     | 0.755788 | -0.408440803 | 0.770527 |
| 138.5   | 200.5   | 0.792236 | -0.662531054 | 0.569021 |
| 781.497 | 1074.49 | 0.861911 | -0.374089511 | 0.651367 |
| 655     | 701     | 0.789831 | -0.433510159 | 0.735913 |
| 451     | 375     | 0.771237 | -0.397023445 | 0.930088 |
| 1020.5  | 948     | 0.350837 | -0.728273926 | 0.432311 |
| 1006    | 1278    | 0.938619 | -0.157430967 | 0.782135 |
| 1185    | 983.5   | 0.887511 | -0.241284822 | 0.988228 |
| 862     | 1974    | 0.850781 | -0.592934371 | 0.395525 |
| 3787.05 | 2501.49 | 0.772157 | -0.415945727 | 0.917492 |
| 3117.9  | 3039.93 | 0.922453 | -0.17222073  | 0.939627 |
| 127.5   | 209     | 0.850509 | -0.551409941 | 0.580142 |
| 275     | 294.5   | 0.776791 | -0.64385619  | 0.735181 |
| 69      | 80.5    | 0.90976  | -0.18966122  | 0.790835 |
| 210     | 254     | 0.967485 | -0.066787091 | 0.819293 |
| 3224    | 1879.5  | 0.98574  | -0.022322366 | 0.646735 |
| 4981.97 | 5093.61 | 0.901698 | -0.223291375 | 0.886487 |

|          |          |          |              |           |
|----------|----------|----------|--------------|-----------|
| 1318.5   | 2053     | 0.616268 | -1.512932814 | 0.376775  |
| 126.5    | 84       | 0.872988 | -0.241526588 | 0.850579  |
| 1518     | 1489     | 0.553391 | -0.618129365 | 0.574038  |
| 6.5      | 5.5      | 0.408983 | -2.700439718 | 0.490574  |
| 617.922  | 628.602  | 0.676933 | -0.37877454  | 0.655077  |
| 756.999  | 827.991  | 0.748675 | -0.5983633   | 0.684415  |
| 592.5    | 656      | 0.601155 | -0.669574728 | 0.507425  |
| 143.5    | 94       | 0.90186  | 0.106556101  | 0.514422  |
| 69242.8  | 59133.5  | 0.871697 | -0.17440085  | 0.963565  |
| 392.001  | 254.5    | 0.474603 | -1.192648758 | 0.778991  |
| 108.5    | 120.5    | 0.837007 | 0.35738984   | 0.900444  |
| 3896     | 4220     | 0.567603 | -0.727492357 | 0.495029  |
| 758.5    | 743      | 0.522297 | -1.279292991 | 0.535825  |
| 1291.5   | 1303.5   | 0.866986 | -0.283622987 | 0.86017   |
| 36.5     | 102.5    | 0.907551 | -0.489384841 | 0.425641  |
| 468.5    | 461.999  | 0.941563 | 0.139322018  | 0.933593  |
| 129.5    | 239.5    | 0.738944 | -0.983385286 | 0.393539  |
| 10       | 8        | 1        | 0            | 0.877389  |
| 474.499  | 536      | 0.80425  | -0.396405787 | 0.704996  |
| 56       | 65.5     | 0.97056  | 0.050626073  | 0.890111  |
| 31.5     | 23.5     | 0.755579 | -0.619727919 | 0.931764  |
| 4.23265  | 8.24665  | 0.935903 | -0.218701207 | 0.547372  |
| 369      | 306.5    | 0.678869 | -0.469485283 | 0.869878  |
| 94.5     | 87.5     | 0.875041 | -0.304854582 | 0.923327  |
| 42       | 28       | 0.46     | -1.034765418 | 0.787305  |
| 629.5    | 614      | 0.377008 | -0.7149798   | 0.403912  |
| 454.5    | 462.5    | 0.842735 | -0.391424942 | 0.83135   |
| 3.47531  | 0.90184  | 0.798745 | -0.485173622 | 0.687398  |
| 335.292  | 323.973  | 0.756269 | -0.407067815 | 0.788402  |
| 1        | 0.5      | 1        | 0            | 0.710482  |
| 1561     | 1436.5   | 0.874362 | -0.225090561 | 0.943433  |
| 64.5     | 49.5     | 0.637331 | -0.689299161 | 0.852353  |
| 5        | 0        | 1        | 0            | 0.370757  |
| 0        | 0        | ?        | #DIV/0!      | ?         |
| 75.6944  | 106.088  | 0.921891 | -0.234914679 | 0.721799  |
| 5.88E-12 | 0.52192  | 1        | -22.03436104 | 0.308068  |
| 2003.37  | 2067.73  | 0.837721 | -0.357649676 | 0.814607  |
| 113.39   | 110.277  | 0.938062 | -0.115004412 | 0.960219  |
| 3        | 0        | 0.388227 | -2.584962501 | 0.853306  |
| 14.6471  | 11.5716  | 0.612421 | -1.259565576 | 0.742453  |
| 9.64E-25 | 1.47E-21 | 0.308068 | 57.50189267  | 0.308068  |
| 62.7964  | 71.3067  | 0.993765 | -0.014727844 | 0.910873  |
| 141.5    | 118.5    | 0.917885 | -0.139033694 | 0.936763  |
| 1.21E-18 | 0.59265  | 1        | #NUM!        | 0.267527  |
| 45.0698  | 39.9368  | 0.618119 | -0.867702575 | 0.706364  |
| 37       | 28.5     | 0.511929 | -0.924051147 | 0.728202  |
| 134.112  | 141.178  | 0.894912 | -0.237508373 | 0.85896   |
| 41.9974  | 80.3937  | 0.344306 | -0.912538371 | 0.0455838 |
| 53.5     | 55.5     | 0.933289 | -0.156504486 | 0.909174  |
| 98       | 97       | 0.937    | -0.147104294 | 0.943613  |
| 11.8453  | 18.1899  | 0.973167 | 0.068617577  | 0.73932   |
| 59.5     | 64.5     | 0.855716 | -0.371255807 | 0.803753  |
| 39.5     | 37       | 0.563965 | -1.445799753 | 0.601466  |
| 35.9782  | 31.777   | 0.860524 | -0.209586952 | 0.980822  |
| 1.5      | 1        | 0.559404 | -1.584962501 | 0.764931  |
| 1        | 1.5      | 0.172724 | 2            | 0.234161  |

|          |          |           |              |            |
|----------|----------|-----------|--------------|------------|
| 70.5     | 62       | 0.840851  | -0.244733589 | 0.963467   |
| 11.7034  | 15.7844  | 0.487     | -2.114240924 | 0.333919   |
| 10.5     | 18.5     | 0.637642  | 1.131244533  | 0.862881   |
| 93.7155  | 111.09   | 0.904599  | -0.246707157 | 0.794942   |
| 5.94E-15 | 3.79361  | 0.403299  | 48.94157707  | 0.871542   |
| 0.5      | 0        | 1         | 0            | 0.450185   |
| 3        | 0        | 0.388227  | -2.584962501 | 0.853306   |
| 0.0002   | 2.43E-05 | 0.291732  | 12.130838    | 0.291655   |
| 452      | 483      | 0.852894  | -0.354612558 | 0.807842   |
| 2719.82  | 2932.26  | 0.967711  | -0.084141817 | 0.923347   |
| 270.983  | 265.872  | 0.91535   | -0.193680574 | 0.928002   |
| 2659.5   | 2424.5   | 0.98176   | 0.040122025  | 0.924774   |
| 6972.01  | 6836.91  | 0.881154  | -0.281114673 | 0.894033   |
| 256.55   | 247.401  | 0.893609  | -0.111920091 | 0.94425    |
| 9.3969   | 12.5     | 0.94904   | 0.054913527  | 0.638197   |
| 2        | 1        | 0.308068  | -2           | 0.710482   |
| 3923.83  | 4206.03  | 0.692063  | -0.620379838 | 0.635191   |
| 126.032  | 155.141  | 0.813038  | -0.462173502 | 0.666885   |
| 595.926  | 608.945  | 0.904388  | -0.232225781 | 0.890469   |
| 834.5    | 813.5    | 0.665179  | -0.546158551 | 0.689683   |
| 121.5    | 114      | 0.929585  | -0.150025444 | 0.973548   |
| 1038.28  | 1102.12  | 0.849255  | -0.27201348  | 0.796919   |
| 105.527  | 91.0747  | 0.907541  | 0.237119152  | 0.837865   |
| 0        | 0.5      | 0.450185  | #DIV/0!      | 1          |
| 1.5      | 0.5      | 0.825659  | 0.415037499  | 0.523243   |
| 101.5    | 101      | 0.602008  | -1.325485914 | 0.604841   |
| 34.5     | 25       | 0.683158  | -0.716207034 | 0.902344   |
| 0.72727  | 4.64E-34 | 0.79295   | -0.489051271 | 0.528548   |
| 2.75125  | 3.15336  | 0.500501  | 0.835015674  | 0.578306   |
| 25       | 21.5     | 0.867787  | -0.251538767 | 0.983355   |
| 0.5      | 0        | 0.0138468 | 2.807354922  | 0.00900735 |
| 66       | 71       | 0.925208  | -0.198904068 | 0.881628   |
| 0.5      | 0        | 0.438509  | 2            | 0.320255   |
| 1.5      | 0.5      | 0.252216  | -1.584962501 | 1          |
| 2264.5   | 2101.5   | 0.172636  | -0.819671369 | 0.2338     |
| 90.5     | 47       | 0.461288  | -0.557331382 | 0.701875   |
| 1501.42  | 1410.85  | 0.842484  | -0.313456373 | 0.890554   |
| 337.5    | 241      | 0.945259  | 0.079014575  | 0.68115    |
| 0.69326  | 1.5      | 0.642826  | #NUM!        | 0.347325   |
| 9.05464  | 8.43543  | 0.426295  | -1.253523741 | 0.477271   |
| 897.155  | 926.263  | 0.837072  | -0.339602154 | 0.812552   |
| 1040.7   | 1704.37  | 0.79943   | -0.360317757 | 0.359932   |
| 9.24875  | 8.84664  | 0.919225  | 0.195658349  | 0.89524    |
| 214.68   | 255.16   | 0.96274   | 0.080822244  | 0.915525   |
| 11       | 9        | 0.518461  | -1           | 0.674073   |
| 0        | 0        | 0.308068  | #DIV/0!      | 0.308068   |
| 6028     | 8495.5   | 0.384407  | -1.536483763 | 0.197344   |
| 462.176  | 472.158  | 0.888171  | 0.257631342  | 0.900417   |
| 10       | 19       | 0.822846  | -0.415037499 | 0.343136   |
| 319.598  | 305.778  | 0.934974  | -0.138922549 | 0.96556    |
| 45.3999  | 59.9178  | 0.532262  | -0.950028363 | 0.326365   |
| 922      | 934.5    | 0.8534    | -0.379998898 | 0.844982   |
| 138.16   | 138.135  | 0.826418  | -0.369578879 | 0.826554   |
| 91.5     | 120.5    | 0.888136  | -0.286881148 | 0.701566   |
| 417      | 432.5    | 0.979468  | -0.027946541 | 0.939766   |
| 797.5    | 717.5    | 0.963394  | -0.065693521 | 0.954128   |

|          |          |           |              |           |
|----------|----------|-----------|--------------|-----------|
| 0        | 0        | ?         | #DIV/0!      | ?         |
| 8.5      | 9        | 0.726505  | -0.628031223 | 0.684446  |
| 1.94E-38 | 1.40E-10 | 0.999372  | 82.05483801  | 0.308347  |
| 1376.5   | 1490     | 0.899171  | -0.179454717 | 0.829447  |
| 0        | 0        | ?         | #DIV/0!      | ?         |
| 516      | 550      | 0.943192  | -0.133176343 | 0.901011  |
| 1128.49  | 1091.85  | 0.929105  | -0.132561917 | 0.955269  |
| 2.04899  | 1.53574  | 0.522705  | -2.004551437 | 0.66352   |
| 56.4239  | 66.0191  | 0.657299  | -1.179257072 | 0.567633  |
| 9.24E-19 | 2.55E-32 | ?         | #NUM!        | ?         |
| 3.87184  | 2.13447  | 0.0715448 | -2.953019336 | 0.276607  |
| 190      | 182      | 0.812793  | -0.289084838 | 0.855343  |
| 138      | 93.5     | 0.814262  | -0.36705747  | 0.918165  |
| 6        | 9.5      | 0.35594   | -1.584962501 | 0.133887  |
| 3918.55  | 3813.19  | 0.633267  | -0.797550791 | 0.654094  |
| 483      | 368      | 0.448009  | -0.691877705 | 0.7655    |
| 876.5    | 790.5    | 0.811152  | -0.480989532 | 0.875455  |
| 1.43163  | 0.0374   | 0.475945  | 1.578930407  | 0.312668  |
| 0        | 0        | ?         | #DIV/0!      | ?         |
| 0        | 2        | 1         | #DIV/0!      | 0.308068  |
| 94.4263  | 117.868  | 0.129835  | -1.193095865 | 0.0582209 |
| 0        | 0        | ?         | #DIV/0!      | ?         |
| 430.5    | 511.5    | 0.781347  | -0.600122308 | 0.669589  |
| 278.5    | 281.5    | 0.726236  | -0.477677328 | 0.71646   |
| 81       | 84.5     | 0.679307  | -0.785261151 | 0.649535  |
| 89.5     | 252.5    | 0.754891  | -1.839959587 | 0.314134  |
| 0        | 1.5      | 1         | #DIV/0!      | 0.308068  |
| 15.5684  | 13.9626  | 0.54364   | -1.720836079 | 0.601506  |
| 8.5      | 8        | 0.584131  | -1.087462841 | 0.624576  |
| 45.5     | 36       | 0.873356  | 0.220125814  | 0.720511  |
| 1034.18  | 983.063  | 0.922344  | 0.163857904  | 0.890695  |
| 40.2153  | 39.0377  | 0.656048  | -1.123990741 | 0.672956  |
| 315.5    | 309      | 0.74539   | -0.497365174 | 0.762507  |
| 888      | 754      | 0.756421  | -0.429187017 | 0.897153  |
| 1984.5   | 2351     | 0.777701  | -0.536707332 | 0.65627   |
| 424.412  | 379.838  | 0.479014  | -1.065948552 | 0.565278  |
| 72.5     | 101.5    | 0.8678    | 0.319936797  | 0.918844  |
| 2.25E-16 | 1.30E-20 | ?         | #NUM!        | ?         |
| 13       | 8.5      | 0.915097  | -0.176877762 | 0.831687  |
| 2        | 2.5      | 0.698091  | 0.807354922  | 0.794363  |
| 58.5     | 63       | 0.982128  | -0.037474705 | 0.928652  |
| 0        | 0.5      | 0.450185  | #DIV/0!      | 1         |
| 180.644  | 248.735  | 0.935796  | 0.165128748  | 0.86542   |
| 62.0781  | 85.152   | 0.973203  | -0.078560251 | 0.789181  |
| 572.784  | 458.376  | 0.613712  | -0.563281189 | 0.843906  |
| 3        | 3.5      | 1         | 0            | 0.91071   |
| 5.55515  | 2.57733  | 0.1233    | -57.01450828 | 0.396382  |
| 3784.5   | 3910.5   | 0.654254  | -0.592415343 | 0.623953  |
| 56.5     | 55.5     | 0.894873  | -0.250323354 | 0.906464  |
| 411.716  | 357.624  | 0.854303  | -0.27457954  | 0.96446   |
| 773      | 915.003  | 0.890244  | -0.21277949  | 0.748743  |
| 4.5      | 4        | 0.338658  | -2.169925001 | 0.402178  |
| 753.5    | 859.5    | 0.915708  | -0.204316876 | 0.827552  |
| 1        | 1        | 0.785812  | 0.584962501  | 0.785812  |
| 8.65113  | 10.8744  | 0.812031  | -0.527926087 | 0.665866  |
| 73.4387  | 73.1487  | 0.960439  | -0.08574555  | 0.963143  |

|         |          |           |              |          |
|---------|----------|-----------|--------------|----------|
| 1419.5  | 1449.5   | 0.439927  | -2.446027571 | 0.429446 |
| 3652.5  | 5558.5   | 0.499297  | -1.585555105 | 0.265349 |
| 58.1954 | 107.93   | 0.983791  | 0.044146343  | 0.599963 |
| 9.60108 | 6.66759  | 0.540509  | -0.959749088 | 0.814791 |
| 226     | 251.5    | 0.893643  | 0.261970079  | 0.953737 |
| 104.5   | 87       | 0.479338  | 1.30106949   | 0.435408 |
| 1       | 0        | 0         | #NUM!        | ?        |
| 404     | 406.5    | 0.794415  | -0.465918668 | 0.789972 |
| 25.1663 | 27.9987  | 0.667207  | -0.963842494 | 0.599792 |
| 11      | 19       | 0.910214  | 0.295455884  | 0.804945 |
| 3315.18 | 3609.91  | 0.58019   | -0.674648504 | 0.499753 |
| 1.5     | 1.5      | 0.513713  | -1.584962501 | 0.513713 |
| 63.6108 | 73.3493  | 0.966576  | 0.071817679  | 0.933258 |
| 445.834 | 342.835  | 0.436008  | -1.290089205 | 0.622957 |
| 0.00927 | 2.42E-06 | 0.296545  | 6.527115602  | 0.292238 |
| 0       | 0        | 0.308068  | #DIV/0!      | 0.308068 |
| 0       | 1        | 0.308068  | #DIV/0!      | 1        |
| 413.5   | 382      | 0.680795  | -0.492071174 | 0.760247 |
| 243.981 | 190.311  | 0.880533  | 0.226994791  | 0.732914 |
| 2       | 2        | 0.198892  | -2           | 0.198892 |
| 193.5   | 337.5    | 0.398842  | -1.120456325 | 0.101839 |
| 502.826 | 485.5    | 0.573161  | -0.683896593 | 0.60684  |
| 767.9   | 710.714  | 0.714315  | -0.720854766 | 0.765678 |
| 4088.63 | 3635.2   | 0.769471  | -0.437355619 | 0.86524  |
| 4283    | 3489     | 0.57091   | -1.047249576 | 0.711632 |
| 6.39458 | 1.9375   | 0.325747  | -36.67872362 | 0.745976 |
| 0       | 0        | ?         | #DIV/0!      | ?        |
| 169     | 156.5    | 0.901089  | -0.2410081   | 0.94849  |
| 326.5   | 276      | 0.8229    | -0.365097245 | 0.944765 |
| 1168.64 | 1170.5   | 0.517555  | -0.766666987 | 0.516058 |
| 12.5    | 6        | 0.436666  | -1.64385619  | 0.846676 |
| 53.5    | 35.5     | 0.774515  | 0.302927133  | 0.500123 |
| 157     | 211.5    | 0.95086   | -0.134749412 | 0.76488  |
| 5.5     | 14.5     | 0.854376  | -0.459431619 | 0.256286 |
| 489     | 420      | 0.601444  | -1.149055809 | 0.694647 |
| 156     | 130.5    | 0.835697  | -0.354664881 | 0.958489 |
| 1154    | 1070.5   | 0.81296   | -0.38126462  | 0.870247 |
| 0       | 0        | ?         | #DIV/0!      | ?        |
| 1.5     | 1        | 0.785812  | -0.584962501 | 1        |
| 0       | 0        | ?         | #DIV/0!      | ?        |
| 71.5    | 43.5     | 0.624108  | 0.469485283  | 0.352274 |
| 25      | 37       | 0.67854   | -0.64385619  | 0.364203 |
| 86.0771 | 100.811  | 0.924715  | 0.179996161  | 0.978257 |
| 5094.5  | 5771.5   | 0.540547  | -0.683775218 | 0.420517 |
| 269     | 267.5    | 0.984234  | -0.032543373 | 0.988175 |
| 670     | 647      | 0.795747  | -0.360111289 | 0.82663  |
| 980.5   | 959      | 0.857062  | -0.315322001 | 0.872801 |
| 87.681  | 91.8601  | 0.546327  | -1.168790128 | 0.514891 |
| 0.65621 | 0.50465  | 0.906886  | -0.247176505 | 0.956409 |
| 1.90546 | 3.95414  | 0.644817  | 1.171662006  | 0.946861 |
| 85.2554 | 84.3508  | 0.756775  | -0.681539672 | 0.763307 |
| 351     | 284.5    | 0.878723  | -0.238581362 | 0.970362 |
| 83.5    | 116      | 0.959837  | 0.100111485  | 0.824758 |
| 86.529  | 107.503  | 0.32024   | -1.963729243 | 0.213214 |
| 3128.82 | 2772.93  | 0.618423  | -0.552058487 | 0.745693 |
| 1029    | 820      | 0.0523228 | -1.049925225 | 0.154162 |

|          |          |          |              |          |
|----------|----------|----------|--------------|----------|
| 0        | 1        | 1        | #DIV/0!      | 0.308068 |
| 177      | 146.5    | 0.971835 | 0.04018909   | 0.803186 |
| 122.791  | 127.633  | 0.998377 | 0.004036071  | 0.978799 |
| 154      | 211.5    | 0.974315 | -0.062215396 | 0.753459 |
| 90.5528  | 92.1668  | 0.8948   | -0.277096827 | 0.884182 |
| 92.0678  | 215.202  | 0.924273 | -0.276156345 | 0.436283 |
| 1259     | 1319     | 0.659367 | -0.316495286 | 0.587685 |
| 1        | 0.5      | 0.651448 | -1           | 1        |
| 398      | 364.5    | 0.440009 | -0.769345881 | 0.530502 |
| 252.5    | 259.5    | 0.762393 | -0.622587573 | 0.74458  |
| 712.5    | 638.5    | 0.509114 | -0.918325491 | 0.601129 |
| 89       | 88       | 0.89866  | -0.227805918 | 0.906397 |
| 87       | 78.5     | 0.60464  | -0.742503778 | 0.691946 |
| 47       | 58.5     | 0.981765 | 0.045323991  | 0.879152 |
| 5        | 8        | 0.866773 | -0.514573173 | 0.622002 |
| 1291     | 1292     | 0.830286 | -0.458523934 | 0.829815 |
| 102.5    | 73       | 0.871791 | -0.148098639 | 0.75462  |
| 112      | 75.9999  | 0.494866 | -1.762960803 | 0.701583 |
| 13.5642  | 20.6964  | 0.696996 | -0.933884585 | 0.433578 |
| 14.5     | 9.5      | 0.805675 | -0.465663572 | 0.950694 |
| 22.3126  | 33.0053  | 0.846975 | 0.400080742  | 0.923002 |
| 0        | 0        | ?        | #DIV/0!      | ?        |
| 2045.6   | 2347.01  | 0.822015 | -0.477650387 | 0.733537 |
| 203.5    | 149.5    | 0.620501 | -1.145323028 | 0.795069 |
| 73.951   | 23.8198  | 0.638475 | -0.93582878  | 0.84073  |
| 1301     | 1305.5   | 0.897604 | -0.205214544 | 0.894954 |
| 543.786  | 501.343  | 0.832573 | -0.448777908 | 0.880766 |
| 686.498  | 677.5    | 0.585257 | -0.582340077 | 0.599379 |
| 1.40252  | 3.00105  | 0.791889 | 0.63861458   | 0.782512 |
| 103.305  | 174.57   | 0.955408 | 0.122963622  | 0.709329 |
| 21       | 18.5     | 0.7193   | -0.584962501 | 0.815992 |
| 0.5      | 2        | 0.663808 | 1.584962501  | 0.825659 |
| 438.398  | 393.879  | 0.587367 | -1.207495209 | 0.653104 |
| 155.834  | 139.501  | 0.40351  | -1.292968076 | 0.482996 |
| 59.5     | 54.5     | 0.983769 | 0.035919574  | 0.929802 |
| 245.665  | 262.005  | 0.767721 | -0.410672928 | 0.709294 |
| 1450.96  | 1353.77  | 0.751835 | -0.453106816 | 0.811404 |
| 7.20808  | 0.69063  | 0.587337 | -1.051605996 | 0.681551 |
| 269      | 330      | 0.827912 | -0.438467165 | 0.688359 |
| 1.5      | 0.5      | 0.706667 | 0.736965594  | 0.468351 |
| 31.5     | 24       | 0.968634 | 0.067114196  | 0.814419 |
| 7.75272  | 4.99244  | 0.685112 | -0.725677676 | 0.967382 |
| 400      | 478      | 0.895227 | -0.249393495 | 0.770617 |
| 4        | 15.5     | 0.886327 | -1           | 0.371082 |
| 3865.5   | 3929.5   | 0.799236 | -0.480248327 | 0.787921 |
| 395.996  | 424.152  | 0.820482 | -0.459246738 | 0.775421 |
| 19       | 12       | 0.562529 | -0.440572591 | 0.811936 |
| 1        | 0        | 0.622002 | -1           | 0.622002 |
| 2.5      | 5        | 0.648139 | 0.847996907  | 0.907467 |
| 120      | 120.5    | 0.932279 | 0.153805336  | 0.934778 |
| 1        | 0.5      | 0.353387 | #NUM!        | 0.622002 |
| 3.5      | 3        | 0.648139 | -1.222392421 | 0.729943 |
| 441.5    | 446      | 0.921162 | -0.153274431 | 0.913237 |
| 3.41E-24 | 3.85E-19 | ?        | -3.264508785 | ?        |
| 3354     | 3224     | 0.701078 | -0.575957687 | 0.73408  |
| 106.5    | 99       | 0.847215 | -0.308444866 | 0.90255  |

|         |         |          |              |          |
|---------|---------|----------|--------------|----------|
| 195.5   | 188.5   | 0.630929 | -0.628031223 | 0.664674 |
| 0       | 0       | 0.308068 | #DIV/0!      | 0.308068 |
| 12751.7 | 14110.3 | 0.833908 | -0.471808908 | 0.772812 |
| 0       | 0       | 0.308068 | #DIV/0!      | 0.308068 |
| 1371.5  | 1224.5  | 0.585565 | -0.816985678 | 0.678086 |
| 104     | 88      | 0.922343 | -0.153545258 | 0.959249 |
| 79.285  | 91.7058 | 0.909674 | 0.155380196  | 0.96579  |
| 0       | 0.9648  | 1        | #DIV/0!      | 0.308068 |
| 135.498 | 126.909 | 0.589097 | -0.970428675 | 0.635995 |
| 286.5   | 255.5   | 0.791596 | -0.387604269 | 0.88585  |
| 22      | 26      | 0.953015 | 0.125530882  | 0.953015 |
| 135     | 162.5   | 0.984856 | 0.036926569  | 0.896603 |
| 152.5   | 97      | 0.807118 | 0.380329765  | 0.597834 |
| 2721    | 3591    | 0.172816 | -0.914565849 | 0.057893 |
| 15      | 11.5    | 0.680597 | 0.707819249  | 0.578356 |
| 162     | 120.5   | 0.889028 | -0.185031894 | 0.874973 |
| 7134.11 | 7409.95 | 0.803099 | -0.41384958  | 0.773779 |
| 12      | 21      | 0.901128 | 0.222392421  | 0.668717 |
| 0       | 1.5     | 1        | #DIV/0!      | 0.308068 |
| 10      | 14      | 0.839403 | -0.415037499 | 0.606089 |
| 12.5911 | 16.8751 | 0.898791 | -0.326587581 | 0.735638 |
| 1423.02 | 1476    | 0.867745 | 0.309870087  | 0.888065 |
| 2714    | 2767.5  | 0.418313 | -0.642577654 | 0.396264 |
| 1.5     | 2.5     | 0.428263 | 1.874469118  | 0.542387 |
| 63.5    | 101     | 0.473918 | -1.207324973 | 0.194018 |
| 13      | 21.5    | 0.811995 | -0.793549123 | 0.556009 |
| 276     | 285     | 0.986056 | -0.029039673 | 0.963257 |
| 225     | 240     | 0.895631 | -0.255360478 | 0.853391 |
| 341.5   | 437     | 0.917144 | -0.233347415 | 0.76674  |
| 127.5   | 183     | 0.780733 | -0.51053766  | 0.508274 |
| 0.5     | 2.5     | 0.329316 | 2            | 0.724378 |
| 628.5   | 479     | 0.44158  | -1.074181813 | 0.661658 |
| 34.5    | 28      | 0.748949 | -0.436099115 | 0.928525 |
| 744.155 | 669.357 | 0.806258 | -0.425415126 | 0.881346 |
| 2.5     | 3.5     | 1        | 0            | 0.821423 |
| 4.5     | 6       | 0.943021 | 0.152003093  | 0.886496 |
| 2113.5  | 2151.5  | 0.604557 | -0.629676629 | 0.58727  |
| 18.3511 | 25.1687 | 0.863725 | -0.307338218 | 0.621508 |
| 1820.5  | 1698    | 0.670001 | -0.588135876 | 0.731898 |
| 256.5   | 220     | 0.830009 | -0.373458396 | 0.935408 |
| 20.0557 | 26.2026 | 0.945135 | 0.15311549   | 0.90492  |
| 376.5   | 442.5   | 0.809541 | -0.512111935 | 0.704472 |
| 94.5    | 81      | 0.752127 | -0.485426827 | 0.873634 |
| 49.8109 | 14.3673 | 0.120715 | -1.061135994 | 0.48832  |
| 776.228 | 753.786 | 0.753984 | -0.509996608 | 0.776835 |
| 34      | 43      | 0.860601 | 0.38827059   | 0.979928 |
| 14.5    | 10.5    | 0.863212 | 0.311944006  | 0.71471  |
| 2398    | 2207    | 0.521152 | -1.185272564 | 0.5783   |
| 11.9653 | 16.8346 | 0.811807 | -0.55699705  | 0.596699 |
| 1.5     | 1       | 0.559404 | -1.584962501 | 0.764931 |
| 5.5     | 4.5     | 0.736134 | 0.628031223  | 0.655849 |
| 77.5    | 60      | 0.804421 | -0.345387068 | 0.987956 |
| 34.6202 | 57.4391 | 0.965726 | 0.100722561  | 0.73023  |
| 1.00921 | 1.44035 | 0.532811 | -35.09579097 | 0.389749 |
| 475.024 | 526.616 | 0.926772 | -0.107490031 | 0.818128 |
| 13      | 18      | 0.308068 | -1           | 0.118807 |



|         |         |            |              |           |
|---------|---------|------------|--------------|-----------|
| 71      | 90.4866 | 0.701155   | -0.774707688 | 0.533522  |
| 11.2509 | 23.178  | 0.994386   | 0.009572546  | 0.313376  |
| 0       | 0       | ?          | #DIV/0!      | ?         |
| 27      | 31.5    | 0.564901   | -0.896906507 | 0.445003  |
| 4       | 7.5     | 0.66704    | -1.415037499 | 0.33681   |
| 49      | 68      | 0.730615   | -0.756728849 | 0.514512  |
| 6.93925 | 5.31573 | 0.956146   | -0.080624363 | 0.856206  |
| 0.5     | 0       | 0.308068   | #NUM!        | 1         |
| 15.5    | 31      | 0.376441   | -0.866733469 | 0.0447349 |
| 7.5     | 2.5     | 1          | 0            | 0.363033  |
| 105.5   | 113.5   | 0.991855   | 0.020367798  | 0.964723  |
| 387.499 | 509.5   | 0.583277   | -1.473927465 | 0.427927  |
| 86.5    | 95      | 0.565082   | -1.627273306 | 0.513862  |
| 33.6002 | 32.6432 | 0.922318   | -0.162147019 | 0.943067  |
| 284     | 230.5   | 0.533068   | -0.850539101 | 0.712434  |
| 674.5   | 606.5   | 0.758117   | -0.501342229 | 0.838956  |
| 215.05  | 263.056 | 0.923763   | -0.190199453 | 0.789425  |
| 315.833 | 313.41  | 0.699128   | -0.35176837  | 0.709033  |
| 230.155 | 201.472 | 0.779244   | -0.627642067 | 0.855531  |
| 0       | 0       | ?          | #DIV/0!      | ?         |
| 1.5     | 0.5     | 0.252216   | -1.584962501 | 1         |
| 716.5   | 559     | 0.766489   | -0.49471893  | 0.942066  |
| 1       | 0       | 0.308068   | #NUM!        | 1         |
| 0       | 0       | ?          | #DIV/0!      | ?         |
| 470     | 596.5   | 0.908431   | -0.239892326 | 0.753129  |
| 917.716 | 962.59  | 0.710681   | -0.467183946 | 0.664016  |
| 175.5   | 206.5   | 0.853925   | -0.410933101 | 0.753985  |
| 62.9519 | 110.901 | 0.461735   | -0.630206892 | 0.076776  |
| 131.5   | 122.591 | 0.830373   | -0.380707507 | 0.879205  |
| 156.5   | 159     | 0.84974    | -0.240170297 | 0.834426  |
| 5       | 9       | 0.871675   | -0.514573173 | 0.565162  |
| 30.5    | 66      | 0.826854   | -0.760812336 | 0.42728   |
| 23      | 7.5     | 0.258505   | -0.879705766 | 0.555132  |
| 680.5   | 753     | 0.789584   | -0.45334931  | 0.711419  |
| 245.5   | 230.5   | 0.580242   | -1.32486937  | 0.617425  |
| 12.8013 | 8.72561 | 0.804928   | -0.394533662 | 0.934576  |
| 2.5     | 1.5     | 0.550362   | -1.321928095 | 0.837425  |
| 7.5     | 8.5     | 0.743882   | -0.447458977 | 0.628311  |
| 27.5    | 31.5    | 0.925568   | 0.149377624  | 0.975138  |
| 17      | 14      | 0.825043   | -0.387023123 | 0.955734  |
| 300.307 | 623.356 | 0.935482   | -0.264977518 | 0.561133  |
| 232     | 242     | 0.910194   | -0.178500896 | 0.877289  |
| 5.5     | 4       | 0.538083   | -1.459431619 | 0.718549  |
| 269.5   | 225     | 0.773493   | -0.391146879 | 0.929621  |
| 33      | 40      | 0.828175   | 0.398549376  | 0.942095  |
| 27.5    | 35.5    | 0.935377   | 0.172836597  | 0.917006  |
| 1703.64 | 1574.84 | 0.821568   | -0.385765151 | 0.878193  |
| 88.3273 | 78.6878 | 0.498566   | -0.895916304 | 0.598708  |
| 76.5    | 80.5    | 0.882871   | -0.257387843 | 0.846035  |
| 54.5    | 73.5    | 0.866215   | -0.393144893 | 0.682385  |
| 2.16995 | 0       | 0.00700766 | -17.567841   | 0.999975  |
| 2530.5  | 2555    | 0.904491   | -0.213110344 | 0.897813  |
| 214.314 | 269.066 | 0.350186   | -0.876896811 | 0.183308  |
| 0       | 1       | 0.622002   | #DIV/0!      | 0.622002  |
| 64.2373 | 64.4758 | 0.784441   | -0.467412785 | 0.781662  |
| 22.5    | 22.5    | 0.857512   | 0.315501826  | 0.857512  |



|         |         |          |              |          |
|---------|---------|----------|--------------|----------|
| 4       | 2.5     | 0.918711 | -0.192645078 | 0.838734 |
| 16.5    | 16.5    | 0.824853 | -0.343954401 | 0.824853 |
| 2       | 3       | 1        | 0            | 0.764931 |
| 5.5     | 2       | 0.373771 | -3.459431619 | 0.774936 |
| 4765    | 4982    | 0.795227 | -0.436490987 | 0.761074 |
| 1360.5  | 1241    | 0.830019 | -0.363479293 | 0.896273 |
| 1772.49 | 1606.03 | 0.798278 | -0.382690725 | 0.878267 |
| 0       | 0.5     | 0.329316 | #DIV/0!      | 0.495025 |
| 1203.12 | 1304.86 | 0.84535  | -0.390291495 | 0.791901 |
| 3.5     | 6       | 0.524165 | 1.440572591  | 0.703192 |
| 7       | 7.5     | 0.523816 | 1.237039197  | 0.544375 |
| 0.5     | 1       | 0.559404 | 1.584962501  | 0.764931 |
| 0       | 0       | ?        | #DIV/0!      | ?        |
| 434.5   | 411     | 0.824501 | -0.351701379 | 0.867638 |
| 227.71  | 210.971 | 0.783725 | -0.406660769 | 0.846935 |
| 0       | 0       | ?        | #DIV/0!      | ?        |
| 277.5   | 244     | 0.870763 | -0.26459492  | 0.963638 |
| 0       | 0       | ?        | #DIV/0!      | ?        |
| 189     | 206     | 0.814297 | -0.464210341 | 0.756218 |
| 1.5     | 1.5     | 0.651448 | 1            | 0.651448 |
| 313.5   | 289     | 0.752489 | -0.544128783 | 0.811965 |
| 11      | 20.5    | 1        | 0            | 0.653384 |
| 3099.06 | 3295.48 | 0.804804 | -0.539961631 | 0.766815 |
| 1       | 4.5     | 0.749519 | #NUM!        | 0.213405 |
| 398.5   | 474     | 0.99856  | 0.003615779  | 0.89325  |
| 1.5     | 1.01555 | 0.718119 | 0.736965594  | 0.597337 |
| 176.315 | 162.145 | 0.78445  | -0.383198793 | 0.85714  |
| 17      | 16.5    | 1        | 0            | 0.979419 |
| 70.5    | 60.5    | 0.72234  | -0.554588852 | 0.842225 |
| 0       | 0       | ?        | #DIV/0!      | ?        |
| 0       | 0       | ?        | #DIV/0!      | ?        |
| 191.5   | 135.5   | 0.320751 | -1.515111391 | 0.560373 |
| 93.4999 | 166.5   | 0.672731 | -1.739537995 | 0.396778 |
| 507.998 | 523     | 0.924442 | -0.191027207 | 0.906566 |
| 1875.52 | 1879.51 | 0.89341  | -0.263434458 | 0.892065 |
| 2.5     | 3       | 0.860525 | -0.321928095 | 0.72755  |
| 1.5     | 5       | 0.741917 | -1.584962501 | 0.202587 |
| 654.58  | 728.289 | 0.882054 | -0.260736142 | 0.80377  |
| 186     | 250     | 0.90397  | -0.305539134 | 0.737613 |
| 0       | 0.5     | 1        | #DIV/0!      | 0.308068 |
| 0       | 0       | 0.308068 | #DIV/0!      | 0.308068 |
| 798.759 | 826.482 | 0.91745  | -0.211895907 | 0.896641 |
| 164.019 | 149.68  | 0.916379 | -0.163257745 | 0.984658 |
| 0       | 0       | 0.308068 | #DIV/0!      | 0.308068 |
| 0.5     | 0.5     | 0.651448 | 1            | 0.651448 |
| 211     | 198.5   | 0.822598 | -0.381249186 | 0.867083 |
| 1262    | 1167    | 0.954759 | 0.099916684  | 0.907517 |
| 10.4793 | 6.81382 | 0.331421 | -1.688853176 | 0.608697 |
| 9.94537 | 18.0646 | 0.599217 | -1.242852752 | 0.252337 |
| 0       | 1.5     | 1        | #DIV/0!      | 0.308068 |
| 767.5   | 659.5   | 0.226335 | -0.812533471 | 0.382057 |
| 25.5    | 15      | 0.305194 | -2.350497247 | 0.589778 |
| 127.5   | 134     | 0.871665 | -0.280107919 | 0.835328 |
| 194     | 164     | 0.959884 | -0.053018382 | 0.869045 |
| 45.5    | 35      | 0.711596 | -0.600904045 | 0.903959 |
| 11      | 5       | 0.532042 | -0.7589919   | 0.829521 |

|         |         |          |              |           |
|---------|---------|----------|--------------|-----------|
| 78.5    | 71      | 0.562215 | -1.124695747 | 0.629751  |
| 0.5     | 3       | 1        | 0            | 0.393741  |
| 284.5   | 349.5   | 0.916657 | -0.201000127 | 0.77447   |
| 5.5     | 4.5     | 0.703664 | 0.540568381  | 0.599015  |
| 802.72  | 719.351 | 0.707596 | -0.517973996 | 0.804277  |
| 643.496 | 720.498 | 0.785583 | -0.624158439 | 0.716799  |
| 1157.5  | 1405    | 0.776142 | -0.546529353 | 0.63781   |
| 7995.8  | 7116.33 | 0.366668 | -0.742811377 | 0.496983  |
| 156.5   | 156     | 0.913668 | -0.145360604 | 0.916529  |
| 2.71685 | 6.08731 | 0.990139 | -0.025543721 | 0.407133  |
| 0       | 0       | ?        | #DIV/0!      | ?         |
| 114     | 115.5   | 0.934553 | 0.155794673  | 0.942082  |
| 293     | 358     | 0.932738 | 0.158389971  | 0.938654  |
| 0       | 1       | 1        | #DIV/0!      | 0.308068  |
| 1       | 1       | 0.710482 | -1           | 0.710482  |
| 14      | 20.5    | 0.563684 | -1.807354922 | 0.363957  |
| 249.737 | 277.078 | 0.88426  | -0.301412286 | 0.818551  |
| 17      | 8.5     | 0.340796 | 1.355480655  | 0.232524  |
| 1.5     | 0       | 1        | 0            | 0.329316  |
| 92.5    | 68      | 0.415617 | -2.321928095 | 0.573279  |
| 292.5   | 358     | 0.974918 | 0.058005603  | 0.888719  |
| 0       | 0       | 0.308068 | #DIV/0!      | 0.308068  |
| 0.5     | 0       | 0.308068 | #NUM!        | 1         |
| 16      | 13.5    | 0.959366 | 0.087462841  | 0.858856  |
| 440     | 399     | 0.920973 | -0.128514741 | 0.992605  |
| 487     | 420     | 0.635607 | -0.454072212 | 0.813269  |
| 555.5   | 360     | 0.687531 | -0.664372467 | 0.984898  |
| 12.1485 | 1.28732 | 0.785361 | 0.408154097  | 0.347365  |
| 113.591 | 132.304 | 0.918797 | -0.217732627 | 0.825072  |
| 2.5     | 2       | 0.622002 | -1.321928095 | 0.739226  |
| 130     | 195     | 0.627926 | -1.530514717 | 0.412451  |
| 6.60328 | 8.20263 | 0.955791 | -0.081310836 | 0.765698  |
| 17      | 14      | 0.606953 | -0.839535328 | 0.753804  |
| 104     | 100.5   | 0.844442 | -0.316735426 | 0.870597  |
| 16951.6 | 15739.4 | 0.316149 | -0.590329941 | 0.414501  |
| 72.4653 | 81.3402 | 0.965722 | 0.081010523  | 0.961601  |
| 130.5   | 124.5   | 0.665728 | 0.789077627  | 0.646757  |
| 46.5    | 28      | 0.82513  | -0.389411692 | 0.879957  |
| 170.5   | 168     | 0.966155 | -0.078237574 | 0.975551  |
| 5       | 5       | 1        | 0            | 1         |
| 549     | 564.5   | 0.700859 | -0.581026086 | 0.677509  |
| 2       | 3.5     | 0.878232 | -0.415037499 | 0.552674  |
| 154.5   | 177     | 0.837469 | -0.382719779 | 0.740498  |
| 0       | 0.88956 | 1        | #DIV/0!      | 0.308068  |
| 1       | 0       | 0.622002 | -1           | 0.622002  |
| 500.5   | 404     | 0.608708 | -0.55359833  | 0.836399  |
| 4       | 4.5     | 0.84064  | -0.415037499 | 0.764036  |
| 0       | 0       | ?        | #DIV/0!      | ?         |
| 2       | 2.5     | 0.610398 | -2           | 0.504632  |
| 176.946 | 173.433 | 0.855823 | -0.329026677 | 0.869652  |
| 416.005 | 1033.19 | 0.523854 | -0.81231049  | 0.0493851 |
| 10      | 8.5     | 0.60108  | -0.862496476 | 0.723657  |
| 27.8657 | 24.0789 | 0.545254 | -1.567447741 | 0.626357  |
| 77      | 72      | 0.311844 | -0.68182404  | 0.38932   |
| 4.5     | 10      | 0.675463 | 1            | 0.92469   |
| 3       | 2       | 0.673234 | 0.874469118  | 0.561007  |

|          |          |           |              |          |
|----------|----------|-----------|--------------|----------|
| 73.5     | 67.5     | 0.736024  | -0.444784843 | 0.814439 |
| 0        | 0        | ?         | #DIV/0!      | ?        |
| 243.5    | 279      | 0.952052  | -0.12042304  | 0.865644 |
| 2        | 1.5      | 0.545627  | 0.584962501  | 0.3832   |
| 1380.5   | 1078     | 0.928008  | 0.151637279  | 0.789187 |
| 330.645  | 283.568  | 0.382779  | -1.149970755 | 0.504745 |
| 442      | 443.5    | 0.569349  | -0.523459959 | 0.565307 |
| 432      | 445      | 0.75691   | -0.648978994 | 0.737827 |
| 0        | 0        | ?         | #DIV/0!      | ?        |
| 422      | 442      | 0.935216  | -0.158856764 | 0.90595  |
| 1.61E-05 | 2.52E-06 | 0.34013   | -3.822753409 | 0.923515 |
| 389.5    | 376      | 0.853796  | -0.338692977 | 0.877686 |
| 0        | 0        | ?         | #DIV/0!      | ?        |
| 6.5      | 14       | 0.90539   | -0.378511623 | 0.494781 |
| 19       | 20.5     | 0.832681  | -0.293731203 | 0.763802 |
| 224.5    | 388.5    | 0.909518  | -0.259824849 | 0.550305 |
| 22.5     | 37       | 0.74905   | -0.906890596 | 0.465086 |
| 324      | 294.499  | 0.596225  | -0.864116572 | 0.669516 |
| 7618.5   | 7658.5   | 0.698168  | -0.50485357  | 0.693218 |
| 1        | 0.5      | 0.353387  | #NUM!        | 0.622002 |
| 3        | 7        | 1         | 0            | 0.591677 |
| 0        | 0.5      | 1         | #DIV/0!      | 0.308068 |
| 2.5      | 3        | 1         | 0            | 0.889735 |
| 8.34649  | 1.40531  | 0.377202  | -2.831778581 | 0.975325 |
| 46784.5  | 31106    | 0.0949293 | -1.189316319 | 0.402734 |
| 0        | 0        | ?         | #DIV/0!      | ?        |
| 53.0591  | 27.9457  | 0.411627  | -1.602423334 | 0.797708 |
| 0        | 1        | 0.622002  | #DIV/0!      | 0.622002 |
| 0        | 0        | ?         | #DIV/0!      | ?        |
| 9.05E-05 | 2.89E-28 | 0.308068  | -67.67764148 | 1        |
| 77.5     | 61       | 0.99041   | -0.018736563 | 0.85268  |
| 80       | 67.5     | 0.766346  | 0.472487771  | 0.679106 |
| 3027     | 2809.5   | 0.617834  | -0.518595908 | 0.701033 |
| 16.5     | 10.5     | 0.292117  | -1.137503524 | 0.699495 |
| 2        | 2.5      | 0.610398  | -2           | 0.504632 |
| 332      | 302      | 0.777465  | -0.52954938  | 0.841279 |
| 34.5939  | 50.1232  | 0.858766  | -0.455343153 | 0.642081 |
| 0        | 0.5      | 0.353387  | #DIV/0!      | 0.622002 |
| 10.5     | 7        | 0.774544  | -0.485426827 | 0.961634 |
| 3269.52  | 3108.5   | 0.673865  | -0.589111855 | 0.718363 |
| 1.5      | 1        | 1         | 0            | 0.764931 |
| 10       | 8        | 0.50699   | -1.514573173 | 0.638879 |
| 0        | 1.5      | 1         | #DIV/0!      | 0.034897 |
| 3.09194  | 3.4396   | 0.956873  | -0.05181122  | 0.821659 |
| 8        | 6        | 0.514418  | -1.415037499 | 0.6882   |
| 234      | 256      | 0.365943  | -1.089005006 | 0.299596 |
| 3        | 6.5      | 0.895809  | -0.263034406 | 0.337423 |
| 845      | 914      | 0.802423  | -0.342346466 | 0.730045 |
| 424      | 424.5    | 0.398848  | -1.635163314 | 0.39813  |
| 4216.5   | 3480.1   | 0.770819  | -0.435378757 | 0.922966 |
| 0        | 0        | ?         | #DIV/0!      | ?        |
| 63       | 61.5     | 0.841455  | -0.377367081 | 0.857566 |
| 637.001  | 586      | 0.95204   | -0.082733298 | 0.979047 |
| 0        | 0        | ?         | #DIV/0!      | ?        |
| 405.043  | 409.221  | 0.801722  | -0.449478653 | 0.794343 |
| 5        | 5        | 0.686187  | -1           | 0.686187 |

|         |         |          |              |          |
|---------|---------|----------|--------------|----------|
| 72.5    | 77.4999 | 0.895291 | -0.237394585 | 0.848458 |
| 113     | 184     | 0.838941 | -0.43647467  | 0.505363 |
| 0       | 0       | ?        | #DIV/0!      | ?        |
| 1870.5  | 2190    | 0.764617 | -0.745733452 | 0.672646 |
| 1498    | 1401.5  | 0.770497 | -0.347310564 | 0.837782 |
| 32.5    | 40.5    | 0.956503 | -0.115477217 | 0.819639 |
| 54      | 68.5    | 0.660011 | -0.94753258  | 0.503746 |
| 0.82162 | 2.5142  | 0.7405   | -4.330965979 | 0.333247 |
| 364.5   | 353.5   | 0.808432 | 0.413552481  | 0.791617 |
| 0       | 0       | 0.308068 | #DIV/0!      | 0.308068 |
| 291.174 | 264.017 | 0.631308 | -0.92316363  | 0.697903 |
| 392.45  | 427.452 | 0.909446 | -0.201282466 | 0.848366 |
| 226     | 246     | 0.86933  | 0.314247358  | 0.916496 |
| 7.42399 | 0.15784 | 0.531236 | -1.344715324 | 0.693893 |
| 55.6372 | 51.5014 | 0.751551 | -0.572294235 | 0.805946 |
| 90      | 91      | 0.826111 | -0.447458977 | 0.819058 |
| 9.5     | 10      | 0.791102 | 0.506959989  | 0.816437 |
| 1274    | 1414.5  | 0.521155 | -0.483842318 | 0.388978 |
| 463.735 | 410.996 | 0.850861 | -0.343709488 | 0.930368 |
| 6       | 1.5     | 0.532236 | -1           | 0.748162 |
| 23      | 24      | 0.966001 | 0.091147888  | 0.988662 |
| 217     | 223     | 0.894153 | -0.237989276 | 0.875137 |
| 255.5   | 234.5   | 0.650563 | -0.842361372 | 0.710494 |
| 7       | 13.5    | 1        | 0            | 0.644939 |
| 114.218 | 134.37  | 0.98389  | -0.024380714 | 0.816838 |
| 804.758 | 856.604 | 0.907757 | 0.197284753  | 0.948186 |
| 137     | 67.5    | 0.835608 | 0.336596145  | 0.554844 |
| 15.5    | 33      | 0.973136 | -0.096215315 | 0.547336 |
| 76      | 128.5   | 0.980271 | 0.055853235  | 0.687825 |
| 0       | 0       | ?        | #DIV/0!      | ?        |
| 0       | 0       | ?        | #DIV/0!      | ?        |
| 115     | 122.5   | 0.859891 | -0.337695411 | 0.817174 |
| 4.5     | 2       | 0.770925 | 0.415037499  | 0.457976 |
| 0       | 0       | ?        | #DIV/0!      | ?        |
| 38415.3 | 45031.7 | 0.285494 | -0.736507493 | 0.1606   |
| 2099    | 2017    | 0.460511 | -0.390278369 | 0.531544 |
| 367.5   | 327     | 0.972101 | -0.056034035 | 0.947236 |
| 14.5    | 7.5     | 0.632798 | -0.688055994 | 0.894223 |
| 16.5    | 16      | 0.44338  | -2.044394119 | 0.459998 |
| 1516    | 1404    | 0.699838 | -0.616956882 | 0.76014  |
| 4       | 4.5     | 0.81954  | 0.459431619  | 0.878786 |
| 411.5   | 779.5   | 0.793754 | -0.777858025 | 0.435136 |
| 54      | 56      | 0.840717 | -0.328622747 | 0.812534 |
| 343.661 | 344.52  | 0.861262 | -0.308129292 | 0.859488 |
| 385.962 | 406.788 | 0.126224 | -0.956023909 | 0.101497 |
| 0.5     | 1.5     | 1        | 0            | 0.513713 |
| 0       | 0       | ?        | #DIV/0!      | ?        |
| 4.5     | 59.5    | 0.861064 | 1.637429921  | 0.428789 |
| 59.5    | 64.5    | 0.818076 | -0.435386145 | 0.761821 |
| 4.5     | 3       | 0.562529 | -1.169925001 | 0.811936 |
| 32      | 32      | 0.564043 | -1.04580369  | 0.564043 |
| 2       | 3       | 0.680109 | 1            | 0.834708 |
| 14.5    | 22.5    | 0.916157 | -0.273018494 | 0.663781 |
| 307.769 | 233.942 | 0.697578 | -0.42056537  | 0.983842 |
| 0       | 0.5     | 1        | #DIV/0!      | 0.308068 |
| 32      | 76.5    | 0.782197 | 0.781359714  | 0.795896 |

|          |         |          |              |          |
|----------|---------|----------|--------------|----------|
| 382      | 305.5   | 0.97518  | 0.050105056  | 0.836325 |
| 49.5     | 49.5    | 0.887835 | -0.254317189 | 0.887836 |
| 397      | 434.5   | 0.959267 | -0.101613737 | 0.903005 |
| 0        | 0       | ?        | #DIV/0!      | ?        |
| 0        | 0       | ?        | #DIV/0!      | ?        |
| 0        | 0       | ?        | #DIV/0!      | ?        |
| 0.5      | 0       | 0.438509 | 2            | 0.320255 |
| 51.5     | 63.5    | 0.925069 | 0.208317236  | 0.962469 |
| 127.5    | 171     | 0.568502 | -1.455194626 | 0.398709 |
| 973      | 895     | 0.628614 | -0.6043679   | 0.708587 |
| 0        | 0       | ?        | #DIV/0!      | ?        |
| 0.19436  | 0.5     | 0.448558 | 2.363167066  | 0.626933 |
| 0.5      | 0.5     | 0.450185 | #NUM!        | 0.450185 |
| 6.26E-18 | 0.72332 | 1        | #NUM!        | 0.308068 |
| 393.5    | 473.5   | 0.959632 | -0.108467172 | 0.847693 |
| 0        | 0.5     | 1        | #DIV/0!      | 0.308068 |
| 0.49999  | 0       | 0.308068 | -34.55888643 | 1        |
| 1.12E-06 | 0.56866 | 0.999998 | #NUM!        | 0.204794 |
| 0        | 1.5     | 1        | #DIV/0!      | 0.308068 |
| 405.999  | 654.997 | 0.961642 | 0.097883323  | 0.713342 |
| 89       | 128.5   | 0.904794 | -0.227805918 | 0.635913 |
| 0        | 0       | ?        | #DIV/0!      | ?        |
| 945      | 914     | 0.834727 | -0.39031507  | 0.857185 |
| 1.5      | 1       | 0.3832   | #NUM!        | 0.545627 |
| 34       | 33      | 0.923088 | 0.179323699  | 0.906109 |
| 8.95013  | 9.44662 | 0.541625 | -1.33502462  | 0.50785  |
| 315      | 331.5   | 0.845432 | -0.356693513 | 0.809474 |
| 235      | 276     | 0.832453 | -0.345135486 | 0.702948 |
| 59.5     | 59.5    | 0.790847 | -0.387023123 | 0.790847 |
| 3        | 0.5     | 0.758682 | -0.584962501 | 0.648511 |
| 191.714  | 219.703 | 0.772858 | -0.55970072  | 0.677343 |
| 31       | 43.5    | 0.913605 | -0.253756592 | 0.707605 |
| 0.49528  | 2.58079 | 0.840186 | 1.013255213  | 0.540478 |
| 1303     | 1458    | 0.547194 | -0.534641897 | 0.418139 |
| 5541     | 6954.5  | 0.933575 | 0.151495288  | 0.913493 |
| 5.23E-19 | 0       | ?        | #NUM!        | ?        |
| 13.5     | 15.5    | 0.955396 | 0.103093493  | 0.955396 |
| 1        | 0.5     | 0.353387 | #NUM!        | 0.622002 |
| 7.5      | 3.5     | 0.486653 | -1.906890596 | 0.843013 |
| 4.5      | 4.5     | 0.413414 | -3.169925001 | 0.413414 |
| 104.5    | 107.5   | 0.830277 | -0.385431037 | 0.81008  |
| 197.797  | 199.021 | 0.859608 | -0.310373673 | 0.855197 |
| 266      | 325     | 0.965346 | -0.095280503 | 0.84651  |
| 2.5      | 4.5     | 0.8566   | 0.485426827  | 0.8566   |
| 0        | 1.5     | 1        | #DIV/0!      | 0.308068 |
| 0        | 0       | ?        | #DIV/0!      | ?        |
| 167.5    | 116     | 0.805033 | -0.343623166 | 0.911009 |
| 8        | 11.5    | 0.925211 | -0.192645078 | 0.677524 |
| 0.5      | 0       | 0.308068 | #NUM!        | 1        |
| 7        | 15.5    | 0.79117  | -1           | 0.394325 |
| 8        | 5.5     | 0.531113 | -1.415037499 | 0.747458 |
| 0.5      | 0       | 0.308068 | #NUM!        | 1        |
| 0.5      | 0       | 1        | 0            | 0.450185 |
| 524.499  | 617.503 | 0.875385 | -0.330892639 | 0.77118  |
| 0        | 0       | 0.308068 | #DIV/0!      | 0.308068 |
| 208.5    | 230.5   | 0.954496 | -0.115188938 | 0.892352 |

|         |          |          |              |          |
|---------|----------|----------|--------------|----------|
| 1481.21 | 1238.38  | 0.663842 | -0.620563376 | 0.815151 |
| 0       | 0        | ?        | #DIV/0!      | ?        |
| 1592.76 | 1389.33  | 0.72007  | -0.536834803 | 0.831527 |
| 83.5    | 74       | 0.874742 | 0.170884559  | 0.765376 |
| 0       | 0        | ?        | #DIV/0!      | ?        |
| 466     | 343.5    | 0.895412 | 0.155404584  | 0.668334 |
| 1       | 1        | 0.567924 | 1.321928095  | 0.567924 |
| 346     | 301.5    | 0.488959 | -0.570442083 | 0.666084 |
| 12.8867 | 12.1608  | 0.488246 | -1.912857378 | 0.519545 |
| 50.5    | 54       | 0.740122 | -0.570748642 | 0.689065 |
| 6.5     | 6.5      | 0.83383  | 0.387023123  | 0.83383  |
| 4       | 5        | 0.806588 | -0.678071905 | 0.686187 |
| 264     | 236.5    | 0.685371 | -0.393342428 | 0.817523 |
| 721     | 594      | 0.7527   | -0.427766259 | 0.92064  |
| 0.0818  | 0        | 0.308068 | -78.31559067 | 1        |
| 336.5   | 482      | 0.90344  | -0.267758222 | 0.671395 |
| 0       | 0        | ?        | #DIV/0!      | ?        |
| 649     | 613      | 0.895029 | -0.244042585 | 0.932264 |
| 70.8072 | 77.7356  | 0.762164 | -0.487686959 | 0.686849 |
| 1       | 0.5      | 0.474021 | 1            | 0.308068 |
| 0       | 0        | ?        | #DIV/0!      | ?        |
| 181.5   | 126.5    | 0.684775 | 0.71292012   | 0.556483 |
| 3.5     | 1.5      | 0.409302 | -2.807354922 | 0.770719 |
| 214     | 181      | 0.9474   | -0.104842366 | 0.936912 |
| 0.5     | 1        | 0.622002 | #NUM!        | 0.353387 |
| 1.18771 | 0.82406  | 0.417419 | -1.496019788 | 0.655788 |
| 18      | 11       | 0.611386 | -0.710493383 | 1        |
| 1.5     | 2.5      | 0.706667 | 0.736965594  | 1        |
| 146.5   | 104.5    | 0.526033 | -1.075815782 | 0.766413 |
| 19.3801 | 17.4042  | 0.341251 | -0.982031865 | 0.436572 |
| 631.008 | 598.482  | 0.820992 | -0.408413217 | 0.857711 |
| 19.5    | 27       | 0.811389 | 0.547487795  | 0.968107 |
| 21      | 23.5     | 0.805657 | -0.534336428 | 0.734688 |
| 2       | 0.5      | 0.450185 | -2           | 1        |
| 0       | 0.5      | 1        | #DIV/0!      | 0.308068 |
| 15      | 27.5     | 0.917112 | -0.206450877 | 0.472395 |
| 92.5    | 131.5    | 0.895459 | 0.275973462  | 0.895459 |
| 11      | 15       | 0.666884 | -1.289506617 | 0.498311 |
| 422     | 524.5    | 0.81959  | -0.538704835 | 0.687961 |
| 188.027 | 213.384  | 0.939513 | 0.158342995  | 0.990155 |
| 0       | 0        | 0.308068 | #DIV/0!      | 0.308068 |
| 308     | 306      | 0.834564 | -0.378043292 | 0.839123 |
| 8.58289 | 1.53E-07 | 0.439768 | -1.988743362 | 0.784295 |
| 45.5    | 31       | 0.931945 | -0.132755209 | 0.82333  |
| 11.5    | 15.5     | 0.871961 | 0.38332864   | 0.981587 |
| 429     | 582      | 0.942503 | 0.149983926  | 0.871042 |
| 0.5     | 0        | 1        | 0            | 0.450185 |
| 51      | 18.5     | 0.557015 | -0.672425342 | 0.671579 |
| 5       | 9        | 0.924624 | 0.263034406  | 0.777997 |
| 0       | 0        | ?        | #DIV/0!      | ?        |
| 1925.5  | 3291     | 0.925047 | 0.197507049  | 0.721383 |
| 52      | 70.0001  | 0.852444 | -0.452512205 | 0.674899 |
| 621     | 524      | 0.618006 | -0.812883053 | 0.747224 |
| 10.5    | 10       | 0.329796 | 2.920565533  | 0.326864 |
| 0       | 0        | ?        | #DIV/0!      | ?        |
| 2.5     | 4        | 0.804317 | -0.736965594 | 0.547349 |



|         |         |          |              |            |
|---------|---------|----------|--------------|------------|
| 0.5     | 0.5     | 0.450185 | #NUM!        | 0.450185   |
| 4.5     | 1.5     | 0.922417 | 0.152003093  | 0.512627   |
| 2.5     | 1.61044 | 0.850034 | 0.263034406  | 0.607205   |
| 214.5   | 237     | 0.73549  | 0.565778944  | 0.790899   |
| 10.7112 | 0.03828 | 0.318105 | 0.213382424  | 0.00323737 |
| 0       | 0       | ?        | #DIV/0!      | ?          |
| 291.55  | 278.779 | 0.78624  | -0.440991142 | 0.820757   |
| 631.001 | 660.001 | 0.800867 | -0.421915232 | 0.766285   |
| 0.5     | 1.5     | 0.613399 | 1.584962501  | 1          |
| 0       | 0.5     | 0.353387 | #DIV/0!      | 0.622002   |
| 262.109 | 303.691 | 0.875534 | -0.239561726 | 0.751436   |
| 3       | 51.5    | 0.876565 | 1.662965013  | 0.354734   |
| 1.05921 | 0       | 0.721966 | -0.680827507 | 0.563034   |
| 294.955 | 292.549 | 0.862054 | -0.266830104 | 0.868621   |
| 0.5     | 0       | 0.308068 | #NUM!        | 1          |
| 0       | 0       | ?        | #DIV/0!      | ?          |
| 538.5   | 575     | 0.990649 | -0.020234484 | 0.945209   |
| 419.567 | 441.012 | 0.339096 | -0.864992195 | 0.295858   |
| 25.5    | 22      | 0.626346 | -0.543142325 | 0.780937   |
| 974.124 | 1029.5  | 0.494679 | -2.044921273 | 0.465744   |
| 398     | 358     | 0.668047 | -0.875073388 | 0.736617   |
| 0       | 0       | ?        | #DIV/0!      | ?          |
| 0       | 0       | ?        | #DIV/0!      | ?          |
| 1.09785 | 5.72376 | 0.79929  | 1.19611262   | 0.57428    |
| 0       | 0       | ?        | #DIV/0!      | ?          |
| 6446    | 9373    | 0.705533 | -1.006280399 | 0.486353   |
| 250     | 283     | 0.747584 | -0.662003536 | 0.664483   |
| 0       | 0       | ?        | #DIV/0!      | ?          |
| 3695.5  | 1531    | 0.835279 | -0.274833333 | 0.627541   |
| 5926.5  | 5310.5  | 0.53803  | -1.58204428  | 0.59963    |
| 10.5    | 7.5     | 0.151621 | -1.222392421 | 0.409302   |
| 3.5     | 1.5     | 0.639236 | -0.807354922 | 0.873517   |
| 666     | 456.5   | 0.843665 | -0.25009535  | 0.847281   |
| 41.5    | 42      | 0.881533 | -0.28757659  | 0.873736   |
| 0       | 0       | ?        | #DIV/0!      | ?          |
| 468.5   | 435.5   | 0.631192 | -0.561292456 | 0.705207   |
| 1798.89 | 1618.76 | 0.634688 | -0.742327505 | 0.718729   |
| 52      | 52      | 0.864513 | -0.224706287 | 0.864513   |
| 0       | 1.5     | 1        | #DIV/0!      | 0.308068   |
| 129.5   | 175.5   | 0.75178  | -0.590543533 | 0.527241   |
| 180.293 | 175.081 | 0.987655 | -0.021127045 | 0.987795   |
| 126     | 116.5   | 0.549408 | -0.682659175 | 0.62791    |
| 414.22  | 357.423 | 0.752199 | -0.368273424 | 0.900865   |
| 0       | 0.5     | 1        | #DIV/0!      | 0.308068   |
| 2.85719 | 3       | 0.651166 | -1.365949163 | 0.6259     |
| 1306.5  | 1246    | 0.946006 | -0.131113082 | 0.974763   |
| 47      | 45.5    | 0.928869 | 0.173331603  | 0.91119    |
| 1.5     | 4.5     | 0.651448 | -0.584962501 | 0.039481   |
| 0.96981 | 0.19562 | 0.814918 | 0.436508924  | 0.466216   |
| 4.5498  | 2.30236 | 0.316677 | -2.133985583 | 0.694971   |
| 0       | 0       | ?        | #DIV/0!      | ?          |
| 6       | 6       | 0.935305 | -0.125530882 | 0.935305   |
| 0       | 0       | ?        | #DIV/0!      | ?          |
| 172     | 163     | 0.986535 | -0.025385318 | 0.973076   |
| 1011.39 | 1074.73 | 0.931438 | 0.162343356  | 0.967439   |
| 3412.5  | 3339    | 0.813218 | -0.31717978  | 0.833105   |

|          |          |          |              |          |
|----------|----------|----------|--------------|----------|
| 1.83E-31 | 0.77367  | 1        | #NUM!        | 0.308068 |
| 969      | 929.5    | 0.803489 | -0.446647106 | 0.83282  |
| 1322.5   | 1161     | 0.809615 | 0.483087321  | 0.753763 |
| 1        | 1.5      | 1        | 0            | 0.785812 |
| 631.5    | 533.5    | 0.78207  | -0.389749588 | 0.923596 |
| 17.5     | 24       | 0.644138 | 1.080170349  | 0.755492 |
| 474.5    | 418.5    | 0.704861 | -0.493659496 | 0.820818 |
| 3910.5   | 4009     | 0.643708 | -0.945518056 | 0.627164 |
| 2        | 0.5      | 0.758682 | 0.584962501  | 0.462019 |
| 5.22421  | 5.99E-05 | 0.930353 | 0.157216043  | 0.425657 |
| 7        | 9        | 0.708007 | -1           | 0.56348  |
| 1302.5   | 1069.5   | 0.382152 | -0.781965579 | 0.59972  |
| 130.5    | 134      | 0.742435 | 0.522840789  | 0.757455 |
| 84.7058  | 64.9044  | 0.987634 | 0.019863114  | 0.783401 |
| 216.469  | 432.575  | 0.906143 | 0.299975098  | 0.699238 |
| 169.5    | 180.5    | 0.968433 | -0.074224585 | 0.927709 |
| 50.5     | 52.5     | 0.465949 | -0.570748642 | 0.419206 |
| 3        | 6.5      | 0.523243 | 1.321928095  | 0.882955 |
| 2        | 1.5      | 0.680109 | -1           | 0.834708 |
| 4235     | 3667     | 0.494295 | -0.788408874 | 0.633561 |
| 0        | 0.5      | 1        | #DIV/0!      | 0.308068 |
| 9.5      | 4        | 0.185633 | #NUM!        | 0.523358 |
| 0        | 0        | ?        | #DIV/0!      | ?        |
| 896      | 1042.5   | 0.989987 | -0.024356713 | 0.892706 |
| 46       | 66       | 0.922128 | -0.219781208 | 0.69428  |
| 0        | 0        | ?        | #DIV/0!      | ?        |
| 583.679  | 576.74   | 0.553319 | -0.662762963 | 0.565407 |
| 82       | 45       | 0.567191 | 0.927850214  | 0.407301 |
| 7.19E-15 | 7.26E-20 | ?        | #NUM!        | ?        |
| 2.5      | 2        | 0.834708 | -0.321928095 | 1        |
| 0.5      | 0        | 0.308068 | #NUM!        | 1        |
| 6.42516  | 15.8153  | 0.493717 | -8.758680897 | 0.151293 |
| 2577.46  | 1583.19  | 0.599679 | -0.412736957 | 0.768607 |
| 75       | 99.5     | 0.839328 | -0.447458977 | 0.656739 |
| 3        | 6.5      | 0.720345 | 1            | 0.951853 |
| 335.587  | 252.553  | 0.261582 | -1.12189342  | 0.508752 |
| 2058.5   | 2068.5   | 0.769914 | -0.363070772 | 0.765117 |
| 0        | 0.5      | 0.450185 | #DIV/0!      | 1        |
| 71.8753  | 108.548  | 0.824088 | -0.548011157 | 0.571246 |
| 2.5      | 7.5      | 0.889735 | 0.263034406  | 0.267912 |
| 15       | 22       | 0.305862 | -3.321928095 | 0.15824  |
| 4        | 5.5      | 0.879601 | 0.321928095  | 0.939529 |
| 166.718  | 174.225  | 0.377026 | -0.972440437 | 0.340885 |
| 18       | 20.5     | 0.738582 | -0.847996907 | 0.663728 |
| 0.5      | 0        | 1        | 0            | 0.450185 |
| 7.5      | 31       | 0.929192 | 0.415037499  | 0.476833 |
| 36.6481  | 30.7235  | 0.920137 | -0.185943115 | 0.973034 |
| 202.5    | 206.5    | 0.757001 | -0.713410866 | 0.745343 |
| 8        | 11.5     | 0.758248 | -0.540568381 | 0.477703 |
| 104.5    | 91.5     | 0.803337 | -0.376442254 | 0.908705 |
| 2.12346  | 0.7669   | 0.762167 | -0.588646192 | 0.783424 |
| 0        | 0.5      | 0.450185 | #DIV/0!      | 1        |
| 822      | 943.5    | 0.989449 | 0.025227146  | 0.922329 |
| 254.5    | 315      | 0.959491 | -0.108878797 | 0.828998 |
| 0.5      | 0        | 0.308068 | #NUM!        | 1        |
| 43.3741  | 50.6191  | 0.831789 | -0.508729544 | 0.741556 |

|          |          |           |              |           |
|----------|----------|-----------|--------------|-----------|
| 17       | 24.5     | 0.680424  | -0.387023123 | 0.282576  |
| 10.5     | 22.5     | 0.867982  | -0.392317423 | 0.371161  |
| 6.06E-24 | 0        | 0.308068  | 76.35756612  | 0.308068  |
| 121.5    | 157.5    | 0.931622  | -0.176619654 | 0.761153  |
| 0        | 0        | ?         | #DIV/0!      | ?         |
| 3.41E-18 | 9.69E-24 | ?         | -9.293558131 | ?         |
| 1146.49  | 1033.5   | 0.6777    | -0.464305125 | 0.787677  |
| 0        | 0        | ?         | #DIV/0!      | ?         |
| 90.8496  | 137.869  | 0.52806   | -1.834749176 | 0.308528  |
| 618.447  | 674.201  | 0.774334  | -0.368193672 | 0.690244  |
| 137.782  | 142.157  | 0.554933  | -0.570417708 | 0.519799  |
| 670.169  | 780.731  | 0.632611  | -0.790790379 | 0.514153  |
| 0.5      | 0.5      | 0.450185  | #NUM!        | 0.450185  |
| 3.03395  | 0        | 0.860962  | -0.261774836 | 0.408587  |
| 0.5      | 0        | 0.308068  | #NUM!        | 1         |
| 1.67E-22 | 1.18E-08 | 1         | #NUM!        | 0.308068  |
| 0        | 0        | ?         | #DIV/0!      | ?         |
| 549.497  | 479.001  | 0.766534  | -0.507639458 | 0.865438  |
| 157.223  | 142.24   | 0.336511  | -0.908050118 | 0.43053   |
| 209.805  | 257.42   | 0.503422  | -0.949931969 | 0.346115  |
| 2.05037  | 1.82191  | 0.904577  | -0.259022281 | 0.969167  |
| 135.376  | 134.871  | 0.88187   | -0.167759271 | 0.885839  |
| 0        | 0        | ?         | #DIV/0!      | ?         |
| 0        | 0        | 0.308068  | #DIV/0!      | 0.308068  |
| 29       | 16.5     | 0.860583  | -0.334419039 | 0.849175  |
| 32       | 27.5     | 0.818602  | -0.445411148 | 0.91372   |
| 162.5    | 97.5     | 0.941494  | -0.07283288  | 0.609845  |
| 18.7615  | 12.749   | 0.779692  | 0.514021719  | 0.629825  |
| 77.1657  | 68.3928  | 0.924926  | 0.16760961   | 0.856542  |
| 23       | 37       | 0.755089  | 0.724365557  | 0.983255  |
| 0        | 0        | ?         | #DIV/0!      | ?         |
| 0        | 1.23E-18 | ?         | #DIV/0!      | ?         |
| 0        | 0        | ?         | #DIV/0!      | ?         |
| 42       | 27.5     | 0.778336  | 0.362570079  | 0.545376  |
| 6        | 8.5      | 1         | 0            | 0.686187  |
| 1.16495  | 3.5      | 0.72472   | -57.62885259 | 0.329256  |
| 1        | 1.5      | 0.550362  | 1.321928095  | 0.685038  |
| 0.5      | 1        | 0.622002  | #NUM!        | 0.353387  |
| 0        | 0        | ?         | #DIV/0!      | ?         |
| 0.5      | 0.5      | 0.450185  | #NUM!        | 0.450185  |
| 438.5    | 348.5    | 0.89303   | -0.200893786 | 0.937875  |
| 88.5001  | 82.0001  | 0.914477  | -0.200822513 | 0.962725  |
| 1111.5   | 1187.32  | 0.825074  | -0.491546483 | 0.785177  |
| 70.5     | 37       | 0.46562   | -1.969626351 | 0.782572  |
| 4.69884  | 0.00299  | 0.0346117 | -2.201799054 | 0.382509  |
| 208      | 213.5    | 0.779057  | -0.419668948 | 0.756991  |
| 2.5      | 0        | 0.308068  | #NUM!        | 1         |
| 1        | 0.5      | 1         | 0            | 0.710482  |
| 528.5    | 519.5    | 0.803202  | -0.36804002  | 0.817661  |
| 2497.31  | 2099.21  | 0.0376251 | -0.952467137 | 0.0966969 |
| 358.615  | 436.1    | 0.997681  | -0.006491554 | 0.886634  |
| 11285.5  | 11518    | 0.671439  | -0.468359781 | 0.649447  |
| 83.5     | 77.5     | 0.731452  | 0.638663521  | 0.699266  |
| 2        | 1        | 0.308068  | -2           | 0.710482  |
| 4823.49  | 5106.79  | 0.826619  | -0.376955958 | 0.783873  |
| 2        | 4.5      | 0.698562  | -1           | 0.232415  |

|          |         |          |              |          |
|----------|---------|----------|--------------|----------|
| 6.0657   | 5.49635 | 0.700729 | 0.603186332  | 0.651702 |
| 529.693  | 550.238 | 0.837037 | -0.29151928  | 0.803498 |
| 25.0441  | 14.7553 | 0.890242 | 0.235246182  | 0.652619 |
| 172.227  | 172.214 | 0.816745 | -0.422228645 | 0.8168   |
| 200.221  | 240.798 | 0.752614 | -0.706857873 | 0.635251 |
| 5160.89  | 4653.75 | 0.712688 | -0.55386126  | 0.797602 |
| 0        | 0.5     | 1        | #DIV/0!      | 0.308068 |
| 98.3309  | 74.5665 | 0.683011 | -0.712600596 | 0.875021 |
| 0        | 0       | ?        | #DIV/0!      | ?        |
| 564.5    | 487.5   | 0.661944 | -0.776695116 | 0.766553 |
| 1642.81  | 1714.52 | 0.960972 | 0.094927204  | 0.986011 |
| 9.17285  | 4.23963 | 0.602923 | 1.09619908   | 0.456189 |
| 3.95604  | 1.97984 | 0.662853 | -0.499759021 | 0.756049 |
| 266.5    | 215.5   | 0.428254 | -0.731562236 | 0.66781  |
| 0.10424  | 6.00095 | 0.556602 | 5.255793871  | 0.754089 |
| 8        | 24.0065 | 0.855589 | 0.524853531  | 0.531389 |
| 43.5     | 39      | 0.743597 | -0.610053482 | 0.817975 |
| 494      | 466     | 0.514406 | -0.651451025 | 0.577876 |
| 586.253  | 835.185 | 0.98945  | -0.029618358 | 0.773927 |
| 8204.5   | 7402    | 0.253968 | -0.879533451 | 0.349456 |
| 51.4008  | 55.6649 | 0.754442 | 0.416699544  | 0.813241 |
| 0        | 1.43028 | 1        | #DIV/0!      | 0.308068 |
| 0.5      | 0       | 1        | 0            | 0.450185 |
| 4        | 4.26938 | 1        | 0            | 0.952686 |
| 164      | 133.5   | 0.542205 | -1.368867318 | 0.665626 |
| 3289.56  | 3165.03 | 0.649223 | -0.51208926  | 0.689866 |
| 15.7468  | 16.5683 | 0.840512 | 0.438907071  | 0.863525 |
| 7.10E-09 | 4.75579 | 0.403662 | 29.11960938  | 0.894464 |
| 95.1861  | 121.94  | 0.87612  | 0.329189492  | 0.987958 |
| 501      | 395     | 0.347506 | -0.878554374 | 0.593295 |
| 100.419  | 79.222  | 0.868923 | -0.206943299 | 0.923664 |
| 618.5    | 460.5   | 0.820187 | -0.335991846 | 0.958189 |
| 201.371  | 246.16  | 0.845384 | -0.434011161 | 0.719715 |
| 748.236  | 620.455 | 0.543152 | -0.648905384 | 0.741718 |
| 216      | 238.5   | 0.797107 | -0.530885828 | 0.732049 |
| 0        | 0       | 0.308068 | #DIV/0!      | 0.308068 |
| 0        | 0       | 0.308068 | #DIV/0!      | 0.308068 |
| 0        | 0       | ?        | #DIV/0!      | ?        |
| 116      | 162     | 0.9792   | 0.060882242  | 0.831419 |
| 35       | 48.5    | 0.777472 | -0.736965594 | 0.586621 |
| 0.51849  | 0       | 0.621134 | 1.003140827  | 0.353209 |
| 6006.94  | 5312.56 | 0.969154 | -0.048111955 | 0.922298 |
| 383      | 351.5   | 0.735103 | -0.436542339 | 0.815682 |
| 758.5    | 659.5   | 0.784055 | -0.412187261 | 0.895905 |
| 46       | 42      | 0.901454 | -0.166009951 | 0.980215 |
| 75       | 66      | 0.900024 | -0.141355849 | 0.971327 |
| 0        | 0       | ?        | #DIV/0!      | ?        |
| 1.5      | 1       | 0.459495 | 1.874469118  | 0.411236 |
| 3995.5   | 3699    | 0.308678 | -0.806497612 | 0.386493 |
| 18.612   | 15.4923 | 0.990666 | -0.008879395 | 0.760134 |
| 5.57649  | 11.5014 | 0.867438 | -0.27843245  | 0.290161 |
| 4748.57  | 4446.41 | 0.782746 | -0.43449389  | 0.834515 |
| 3551.12  | 3455.36 | 0.242004 | -0.666470254 | 0.270493 |
| 7.01183  | 10.562  | 0.74619  | -0.309381555 | 0.288816 |
| 63       | 57.5    | 0.860108 | -0.319068441 | 0.921223 |
| 1678.5   | 1549    | 0.794046 | -0.52498623  | 0.844933 |

|          |          |           |              |           |
|----------|----------|-----------|--------------|-----------|
| 261.635  | 270.939  | 0.935398  | -0.141932112 | 0.911017  |
| 8.05434  | 5.75302  | 0.863651  | -0.287276305 | 0.920171  |
| 1466.5   | 1820     | 0.859941  | -0.353254429 | 0.71244   |
| 0        | 0        | ?         | #DIV/0!      | ?         |
| 1.52369  | 2.65398  | 0.610545  | -3.834423768 | 0.383311  |
| 192.5    | 153.5    | 0.744176  | 0.517193873  | 0.635328  |
| 12.5     | 11       | 0.774126  | -0.556393349 | 0.85698   |
| 31       | 21.5     | 0.678213  | -0.668794092 | 0.941554  |
| 785.5    | 712      | 0.66905   | -0.716600657 | 0.743184  |
| 712      | 695      | 0.785388  | -0.405612486 | 0.805608  |
| 460.545  | 524.951  | 0.945785  | -0.124906494 | 0.85545   |
| 1417.5   | 1069.5   | 0.594339  | -0.525881228 | 0.914551  |
| 9.5      | 10       | 1         | 0            | 0.965235  |
| 1.22E-06 | 5.72E-18 | 0.308068  | -50.64118073 | 1         |
| 121.852  | 218.58   | 0.852562  | 0.480676356  | 0.851456  |
| 0        | 0        | 0.308068  | #DIV/0!      | 0.308068  |
| 2365.26  | 2262.68  | 0.724872  | -0.541674482 | 0.761048  |
| 2.87679  | 0.71531  | 0.0304151 | -60.8593878  | 0.406313  |
| 676.798  | 772.693  | 0.886174  | -0.311706898 | 0.805234  |
| 365.5    | 421.499  | 0.995612  | 0.00983436   | 0.906425  |
| 3.80E-09 | 2.07284  | 0.45169   | 29.01115666  | 0.995272  |
| 0        | 0        | ?         | #DIV/0!      | ?         |
| 6.13019  | 7.64986  | 0.320574  | -3.238523695 | 0.226676  |
| 14993.1  | 11189.6  | 0.504174  | -0.42654353  | 0.995058  |
| 97.0158  | 90.515   | 0.896924  | -0.120294816 | 0.983188  |
| 54.5     | 35       | 0.823562  | -0.428334322 | 0.92992   |
| 6        | 6.74421  | 0.485282  | -2.141472543 | 0.424902  |
| 489.027  | 492.619  | 0.855197  | -0.378947424 | 0.850676  |
| 151      | 140      | 0.930109  | -0.161589142 | 0.978119  |
| 0.99182  | 0.36248  | 0.333385  | #NUM!        | 0.702486  |
| 53       | 46.5     | 0.665508  | -0.683526335 | 0.768276  |
| 875.5    | 820      | 0.351124  | -1.19653454  | 0.40036   |
| 0.5      | 1        | 0.198892  | 2            | 0.353387  |
| 0        | 0        | ?         | #DIV/0!      | ?         |
| 27.5     | 37       | 0.845443  | -0.321928095 | 0.603116  |
| 1211.47  | 1196.5   | 0.838507  | -0.24823196  | 0.850887  |
| 5.5      | 4        | 0.785812  | -0.459431619 | 1         |
| 647.31   | 742.904  | 0.823173  | -0.442019938 | 0.729194  |
| 7.21858  | 4.43238  | 0.822977  | -0.39228607  | 0.889148  |
| 4.86E-08 | 4.99701  | 1         | 1.0644661    | 0.0782468 |
| 348.5    | 329.5    | 0.786396  | -0.354902426 | 0.83846   |
| 59.5     | 44       | 0.96814   | 0.047696742  | 0.72966   |
| 47.9675  | 32.9657  | 0.85708   | -0.274816435 | 0.884866  |
| 7.5      | 7.5      | 0.93083   | 0.180572246  | 0.93083   |
| 6.78901  | 11.4773  | 0.662536  | -2.174866747 | 0.42979   |
| 0        | 0        | ?         | #DIV/0!      | ?         |
| 0        | 0        | ?         | #DIV/0!      | ?         |
| 334      | 349      | 0.796536  | -0.386524812 | 0.759377  |
| 236.5    | 269.5    | 0.959389  | -0.10433666  | 0.878822  |
| 479      | 483.5    | 0.84765   | -0.351212748 | 0.841161  |
| 77       | 60       | 0.922314  | 0.159478214  | 0.77957   |
| 15048    | 14547.7  | 0.834886  | -0.216207516 | 0.873732  |
| 28.5     | 31       | 0.97616   | -0.051530301 | 0.916778  |
| 1214.11  | 1094.35  | 0.660975  | -0.555975416 | 0.759466  |
| 2.35E-06 | 2.14E-19 | 0.308068  | -75.75060504 | 1         |
| 258      | 270.5    | 0.915143  | -0.207096234 | 0.884691  |

|          |          |           |              |          |
|----------|----------|-----------|--------------|----------|
| 105.5    | 116      | 0.982849  | -0.041619089 | 0.922999 |
| 32       | 26.5     | 0.835022  | -0.415037499 | 0.947915 |
| 111.722  | 126.738  | 0.786537  | -0.52418677  | 0.698444 |
| 1        | 0.5      | 0.651448  | -1           | 1        |
| 648      | 749      | 0.978424  | 0.047090242  | 0.920413 |
| 63.1065  | 76.2713  | 0.798218  | 0.490320628  | 0.900935 |
| 27.6284  | 44.6927  | 0.943238  | 0.170349644  | 0.781193 |
| 33       | 25.5     | 0.989943  | -0.022026306 | 0.860337 |
| 42.5544  | 57.0668  | 0.79276   | -0.703148516 | 0.626213 |
| 0.5      | 0.5      | 0.450185  | #NUM!        | 0.450185 |
| 19       | 7.5      | 0.599135  | -0.389946518 | 0.429318 |
| 305.502  | 336.369  | 0.816688  | -0.360347554 | 0.736966 |
| 0        | 0        | ?         | #DIV/0!      | ?        |
| 38.9626  | 57.5605  | 0.795914  | -0.765161926 | 0.584874 |
| 5476.24  | 6919.8   | 0.608069  | -0.575394317 | 0.379447 |
| 341      | 381      | 0.689065  | -0.847573891 | 0.616128 |
| 631.5    | 554.5    | 0.779759  | -0.519640715 | 0.866819 |
| 169.5    | 212.5    | 0.982587  | -0.047589459 | 0.847897 |
| 8661.5   | 9518.5   | 0.753873  | -0.746686751 | 0.69775  |
| 533.563  | 624.572  | 0.928288  | -0.18916551  | 0.830435 |
| 10.5872  | 6.6001   | 0.217254  | -1.966158644 | 0.497817 |
| 88       | 109.5    | 0.834643  | -0.505235308 | 0.705599 |
| 5.83995  | 13.0095  | 0.500822  | 1.679519444  | 0.757653 |
| 81.3531  | 82.0137  | 0.945584  | -0.113387923 | 0.939755 |
| 297      | 241      | 0.792175  | -0.356338126 | 0.970708 |
| 3        | 2        | 0.578665  | -0.839157239 | 0.889115 |
| 4217.5   | 3924.5   | 0.689639  | -0.471367915 | 0.762822 |
| 9.03069  | 29.1565  | 0.926282  | 0.340535621  | 0.512502 |
| 20.2733  | 12.1248  | 0.176289  | -1.27245654  | 0.618477 |
| 4.5      | 1        | 0.0280085 | -3.169925001 | 0.651448 |
| 107.198  | 119.845  | 0.923465  | -0.189473195 | 0.851109 |
| 392      | 314      | 0.979954  | 0.041715019  | 0.845506 |
| 1061     | 741      | 0.971634  | -0.051208941 | 0.787066 |
| 0        | 0        | ?         | #DIV/0!      | ?        |
| 87.6101  | 104.257  | 0.93229   | 0.179382531  | 0.970494 |
| 16.5     | 21.5     | 0.761462  | -0.652076697 | 0.585317 |
| 184.5    | 165.5    | 0.774618  | -0.516249751 | 0.849978 |
| 210.785  | 211.91   | 0.795137  | -0.500314644 | 0.791537 |
| 4.77E-37 | 1.07E-24 | ?         | 50.49760956  | ?        |
| 0.5      | 0.5      | 0.450185  | #NUM!        | 0.450185 |
| 511.861  | 695.095  | 0.199824  | -1.455663942 | 0.083087 |
| 99.5     | 129.5    | 0.935915  | -0.185413509 | 0.779859 |
| 1.30E-14 | 1.51E-05 | 1         | #NUM!        | 0.308068 |
| 977.5    | 872      | 0.629483  | -1.196550961 | 0.6943   |
| 1137.55  | 1043.59  | 0.723077  | -0.379638902 | 0.818526 |
| 70.388   | 73.7075  | 0.95867   | 0.08859765   | 0.989437 |
| 6.5      | 8        | 0.849717  | -0.378511623 | 0.707528 |
| 0        | 0.5      | 1         | #DIV/0!      | 0.308068 |
| 0        | 0.5      | 0.353387  | #DIV/0!      | 0.622002 |
| 1560     | 1643.5   | 0.885519  | -0.259155446 | 0.848871 |
| 393.5    | 463.5    | 0.636915  | -1.077188005 | 0.534133 |
| 0.5      | 1        | 0.436998  | 2.321928095  | 0.550362 |
| 59       | 79       | 0.958548  | 0.117356951  | 0.876343 |
| 22       | 23       | 0.750722  | -0.652076697 | 0.721463 |
| 1860     | 1948.5   | 0.529021  | -1.040110213 | 0.494539 |
| 2.5      | 4        | 0.804317  | -0.736965594 | 0.547349 |

|         |         |          |              |           |
|---------|---------|----------|--------------|-----------|
| 403.5   | 429     | 0.941918 | 0.141236663  | 0.97758   |
| 395.5   | 387     | 0.936086 | -0.131678858 | 0.951798  |
| 0.5     | 0       | 0.308068 | #NUM!        | 1         |
| 3.5     | 0.5     | 0.252216 | -2.807354922 | 1         |
| 854     | 865.5   | 0.89478  | -0.258311996 | 0.886225  |
| 1614.5  | 1646    | 0.820799 | -0.459040728 | 0.808347  |
| 0       | 0       | ?        | #DIV/0!      | ?         |
| 2       | 1.5     | 0.320255 | #NUM!        | 0.438509  |
| 21      | 17.5    | 0.679552 | -0.932885804 | 0.786384  |
| 3       | 4.5     | 0.867136 | 0.415037499  | 0.933203  |
| 2       | 0       | 0.308068 | #NUM!        | 1         |
| 79      | 78.5    | 0.862949 | -0.315096061 | 0.867305  |
| 0       | 0       | ?        | #DIV/0!      | ?         |
| 0.5     | 0       | 0.308068 | #NUM!        | 1         |
| 0.5     | 0.5     | 1        | 0            | 1         |
| 3.5     | 2       | 0.608871 | -1.222392421 | 0.895809  |
| 1369.82 | 1409.69 | 0.70736  | -0.632298969 | 0.685268  |
| 584.318 | 748.89  | 0.940574 | -0.177231413 | 0.798929  |
| 0       | 0       | ?        | #DIV/0!      | ?         |
| 0       | 0       | ?        | #DIV/0!      | ?         |
| 305.5   | 354.5   | 0.74176  | -0.688974532 | 0.642688  |
| 1.5     | 2       | 1        | 0            | 0.847091  |
| 0       | 0       | ?        | #DIV/0!      | ?         |
| 62.5    | 48.5    | 0.88932  | -0.210896782 | 0.928173  |
| 1       | 1.5     | 0.764931 | -1           | 0.559404  |
| 534.867 | 671.615 | 0.957796 | 0.110987955  | 0.907529  |
| 75.5    | 116     | 0.876504 | 0.368925574  | 0.895959  |
| 2191.82 | 2108.64 | 0.609489 | -0.704705511 | 0.643562  |
| 2       | 0       | 0.198892 | -2           | 0.622002  |
| 78.5    | 63.5    | 0.843499 | -0.317340825 | 0.9949    |
| 19      | 25.5    | 0.647778 | -1.247927513 | 0.479811  |
| 37      | 38      | 0.744482 | -0.594743522 | 0.725276  |
| 958.483 | 1056.06 | 0.958622 | -0.101916583 | 0.897241  |
| 9       | 20.5    | 0.860236 | 0.530514717  | 0.743111  |
| 629     | 659.5   | 0.908667 | -0.217431423 | 0.877354  |
| 964.822 | 1032.85 | 0.878935 | -0.263898348 | 0.828924  |
| 5.67532 | 9.54855 | 0.975557 | 0.064274011  | 0.673623  |
| 0.5     | 1       | 0.622002 | #NUM!        | 0.353387  |
| 14.5    | 19.5    | 0.934225 | -0.214124805 | 0.774275  |
| 882.5   | 896.5   | 0.938244 | -0.129027605 | 0.926839  |
| 2.5     | 2.5     | 0.855216 | -0.321928095 | 0.855216  |
| 673     | 990     | 0.898273 | -0.328373504 | 0.676452  |
| 517.5   | 489     | 0.618754 | -0.570400207 | 0.676929  |
| 26.5    | 26.5    | 0.88045  | 0.202816883  | 0.88045   |
| 117     | 126     | 0.8399   | -0.362570079 | 0.78631   |
| 459.468 | 416.517 | 0.779866 | -0.447489806 | 0.855345  |
| 4.5     | 5       | 0.806588 | 0.152003093  | 1         |
| 4       | 9.5     | 0.633044 | -3           | 0.266457  |
| 0       | 0       | ?        | #DIV/0!      | ?         |
| 4.95846 | 3.51837 | 0.548333 | -1.409850356 | 0.742445  |
| 0.5     | 1.5     | 0.450185 | #NUM!        | 0.0805096 |
| 457.655 | 416.929 | 0.742454 | -0.462108487 | 0.823419  |
| 34.5    | 31.5    | 0.891525 | 0.266514975  | 0.845813  |
| 0       | 0       | ?        | #DIV/0!      | ?         |
| 0       | 0       | ?        | #DIV/0!      | ?         |
| 0       | 0       | ?        | #DIV/0!      | ?         |

|         |         |          |              |          |
|---------|---------|----------|--------------|----------|
| 0       | 0       | ?        | #DIV/0!      | ?        |
| 109.082 | 94.7428 | 0.890796 | -0.207895755 | 0.997753 |
| 178.5   | 190     | 0.880328 | -0.289955705 | 0.838773 |
| 186.5   | 198     | 0.993747 | 0.011557031  | 0.958339 |
| 0.5     | 0.5     | 0.450185 | #NUM!        | 0.450185 |
| 0       | 0       | ?        | #DIV/0!      | ?        |
| 170.5   | 91      | 0.411757 | -2.109847181 | 0.733358 |
| 62.5312 | 67.2096 | 0.793023 | -0.479223769 | 0.740974 |
| 6639.97 | 7262.88 | 0.908714 | -0.230262522 | 0.851515 |
| 0.5     | 0       | 0.622002 | 1            | 0.353387 |
| 292     | 319.5   | 0.874098 | -0.347474215 | 0.81996  |
| 0       | 0       | ?        | #DIV/0!      | ?        |
| 740     | 694     | 0.837637 | -0.328033458 | 0.886623 |
| 1906.4  | 1983.37 | 0.814597 | -0.417703771 | 0.785874 |
| 2       | 0       | 0.622002 | -1           | 0.622002 |
| 4.5     | 9       | 0.636698 | -3.169925001 | 0.346896 |
| 0       | 0.5     | 1        | #DIV/0!      | 0.308068 |
| 0       | 0       | 0.308068 | #DIV/0!      | 0.308068 |
| 18.5    | 22.5    | 0.65674  | -1.121990524 | 0.540766 |
| 1       | 2       | 0.450185 | #NUM!        | 0.18169  |
| 0       | 1.5     | 0.545627 | #DIV/0!      | 0.756486 |
| 20      | 14.5    | 0.218229 | -1.152003093 | 0.494042 |
| 12      | 15      | 0.425278 | -3           | 0.321928 |
| 13.5    | 14.5    | 0.624524 | -1.054447784 | 0.578453 |
| 13      | 13.5    | 0.736315 | 0.691877705  | 0.751928 |
| 10.3753 | 6.07657 | 0.430528 | -1.086303275 | 0.856405 |
| 1.5     | 2       | 1        | 0            | 0.791627 |
| 9.90637 | 10.0805 | 0.921617 | 0.183547885  | 0.931729 |
| 57.5231 | 73.3869 | 0.689709 | -0.977283999 | 0.541646 |
| 158     | 101.5   | 0.292202 | -0.803934861 | 0.84875  |
| 0       | 0.5     | 1        | #DIV/0!      | 0.308068 |
| 30      | 33      | 0.967519 | 0.070389328  | 0.96752  |
| 0.5     | 0.5     | 0.450185 | #NUM!        | 0.450185 |
| 0       | 0       | ?        | #DIV/0!      | ?        |
| 707     | 746     | 0.882692 | -0.293138896 | 0.848093 |
| 301     | 259.5   | 0.661946 | -0.626289363 | 0.787857 |
| 1470    | 1316    | 0.668609 | -0.608711103 | 0.763838 |
| 643.5   | 593     | 0.608292 | -0.750480401 | 0.676751 |
| 127.171 | 69.5157 | 0.907529 | 0.181101338  | 0.618107 |
| 14.5    | 8       | 0.945124 | -0.103093493 | 0.708609 |
| 6.5     | 6.5     | 0.591021 | -1.378511623 | 0.591021 |
| 1.5     | 0       | 0.308068 | #NUM!        | 1        |
| 13.7681 | 6.19981 | 0.876646 | -0.240083427 | 0.69189  |
| 55      | 47      | 0.816754 | -0.321928095 | 0.949371 |
| 1.5     | 2       | 1        | 0            | 0.847091 |
| 520     | 686     | 0.900756 | -0.206984517 | 0.677234 |
| 257     | 162     | 0.193326 | -1.172734535 | 0.614046 |
| 0       | 0       | ?        | #DIV/0!      | ?        |
| 34.5    | 39      | 0.806332 | -0.304563858 | 0.682562 |
| 360.5   | 366.5   | 0.948772 | -0.114477082 | 0.937628 |
| 7.5     | 7       | 0.919847 | -0.206450877 | 0.959844 |
| 259.474 | 276.499 | 0.682714 | -0.605818245 | 0.628496 |
| 481.5   | 475     | 0.976166 | -0.058082432 | 0.984318 |
| 1575    | 1641    | 0.884001 | -0.267437904 | 0.855718 |
| 12      | 11.5    | 0.383524 | -3           | 0.403695 |
| 0       | 0       | ?        | #DIV/0!      | ?        |



|          |          |          |              |           |
|----------|----------|----------|--------------|-----------|
| 0.5      | 0.5      | 1        | 0            | 1         |
| 0        | 0        | ?        | #DIV/0!      | ?         |
| 208      | 287      | 0.960992 | -0.119239136 | 0.778696  |
| 0        | 0        | ?        | #DIV/0!      | ?         |
| 13       | 18.5     | 0.738187 | 0.657112286  | 0.928271  |
| 52.5     | 40       | 0.509106 | -0.669851398 | 0.805878  |
| 81       | 60.5     | 0.689926 | 0.620151929  | 0.563803  |
| 5.5      | 2.5      | 0.415427 | 1.398549376  | 0.297779  |
| 0        | 0        | ?        | #DIV/0!      | ?         |
| 0        | 0        | ?        | #DIV/0!      | ?         |
| 1824.49  | 1873.02  | 0.961058 | -0.086334997 | 0.943266  |
| 222.5    | 227      | 0.901478 | -0.227805918 | 0.887969  |
| 45       | 38.5     | 0.48293  | 1.432959407  | 0.450015  |
| 253.611  | 243.375  | 0.727053 | -0.565351221 | 0.75929   |
| 1        | 4        | 0        | 1            | 0         |
| 417.5    | 443.5    | 0.929753 | -0.178155381 | 0.892392  |
| 7        | 14       | 0.672563 | -0.807354922 | 0.217693  |
| 0.5      | 1        | 0.481309 | 2            | 0.630057  |
| 0        | 0        | ?        | #DIV/0!      | ?         |
| 0.5      | 2.5      | 1        | 0            | 0.415333  |
| 238      | 269      | 0.916044 | 0.197939378  | 0.990377  |
| 8        | 11       | 0.710482 | -1.192645078 | 0.545049  |
| 5        | 3.5      | 0.798692 | -0.514573173 | 1         |
| 253.5    | 244      | 0.807445 | -0.408413109 | 0.836007  |
| 5        | 8.5      | 0.909016 | -0.321928095 | 0.615253  |
| 0        | 0.5      | 1        | #DIV/0!      | 0.308068  |
| 5702.5   | 5568     | 0.743156 | -0.501172736 | 0.762796  |
| 640      | 496      | 0.716687 | -0.562039912 | 0.911543  |
| 0.5      | 1        | 0.710482 | 1            | 1         |
| 4443     | 4447     | 0.456887 | -0.733344193 | 0.45597   |
| 28.8904  | 0.79591  | 0.526347 | -1.26557343  | 0.667031  |
| 3.34414  | 1.14E-21 | 0.136882 | -75.42724061 | 1         |
| 320      | 270      | 0.636452 | -0.660149997 | 0.783008  |
| 274.693  | 229.929  | 0.809062 | -0.345914132 | 0.954361  |
| 21.5     | 23.5     | 0.922279 | -0.178337241 | 0.860875  |
| 1017.12  | 938.258  | 0.600595 | -1.22501461  | 0.648734  |
| 0        | 0        | 0.308068 | #DIV/0!      | 0.308068  |
| 0.85611  | 2.68883  | 0.940656 | -0.340554814 | 0.432648  |
| 0.5103   | 5.41E-18 | 0.308068 | -57.35948918 | 1         |
| 3.5      | 6        | 0.725092 | 0.893084796  | 0.952724  |
| 2.23595  | 4.94E-25 | 0.308068 | #NUM!        | 1         |
| 4.57396  | 6.87501  | 0.391586 | -1.478499312 | 0.172746  |
| 1.07E-24 | 0        | ?        | #NUM!        | ?         |
| 1305.5   | 1102.5   | 0.651144 | -0.560853097 | 0.81248   |
| 8.97E-31 | 5.49657  | 1        | 14.93153285  | 0.0742745 |
| 1.33505  | 9.51E-26 | 0.821546 | -0.416893774 | 0.515984  |
| 25.6057  | 14.0767  | 0.539828 | -0.648993217 | 0.877598  |
| 7.5      | 2.5      | 0.397364 | -1.099535674 | 0.821423  |
| 26.864   | 41.0242  | 0.871352 | -0.283574432 | 0.536115  |
| 445.624  | 453.366  | 0.631841 | -0.851981905 | 0.619212  |
| 59.4006  | 57.5     | 0.999624 | 0.00075029   | 0.976479  |
| 120.907  | 95.4518  | 0.797601 | -0.425654026 | 0.963784  |
| 0.51737  | 2.28235  | 0.804135 | #NUM!        | 0.318134  |
| 84.9677  | 53.1378  | 0.302497 | -0.406144587 | 0.559645  |
| 15.3777  | 18.0104  | 0.547314 | 1.005954478  | 0.613684  |
| 501.998  | 503.496  | 0.80984  | -0.401678401 | 0.807576  |

|          |          |           |              |           |
|----------|----------|-----------|--------------|-----------|
| 1.10989  | 2.0146   | 0.569262  | #NUM!        | 0.331136  |
| 13.8021  | 27.7165  | 0.224193  | -1.744879063 | 0.0337808 |
| 5.75     | 1        | 0.382315  | -2.201633861 | 0.958323  |
| 0.69045  | 0.42857  | 0.207987  | #NUM!        | 0.393946  |
| 2.10288  | 1.95238  | 0.380513  | -18.65400938 | 0.411205  |
| 2.89952  | 0.84127  | 0.394512  | -1.661346021 | 0.972293  |
| 2.89952  | 0.84127  | 0.394512  | -1.661346021 | 0.972293  |
| 0.75     | 0        | 0.308068  | #NUM!        | 1         |
| 0        | 0        | ?         | #DIV/0!      | ?         |
| 0.1      | 0.32     | 0.427124  | 2.169925001  | 0.756063  |
| 1.04E-24 | 1.78E-05 | 0.308068  | 77.07819833  | 0.308111  |
| 0.16667  | 0        | 0.495025  | 1.584959615  | 0.329316  |
| 0.58333  | 0.75     | 0.113502  | -2.807354675 | 0.0598224 |
| 0.76466  | 3.25     | 0.927706  | -0.612894086 | 0.381167  |
| 2.89952  | 0.84127  | 0.394512  | -1.661346021 | 0.972293  |
| 2.89952  | 0.84127  | 0.394512  | -1.661346021 | 0.972293  |
| 0.58333  | 0.75     | 0.113502  | -2.807354675 | 0.0598224 |
| 0.58333  | 0.75     | 0.113502  | -2.807354675 | 0.0598224 |
| 0.58333  | 0.75     | 0.113502  | -2.807354675 | 0.0598224 |
| 0        | 0.25     | 1         | #DIV/0!      | 0.308068  |
| 1.5      | 0.25     | 0.200976  | -1.584962501 | 0.710482  |
| 0.16667  | 0.08333  | 0.353387  | 0.999995672  | 0.198892  |
| 0.25     | 0        | 0.308068  | #NUM!        | 1         |
| 0        | 0        | ?         | #DIV/0!      | ?         |
| 0        | 0.5      | 1         | #DIV/0!      | 0.308068  |
| 0        | 0        | ?         | #DIV/0!      | ?         |
| 0        | 0        | ?         | #DIV/0!      | ?         |
| 0        | 0        | ?         | #DIV/0!      | ?         |
| 0.475    | 0.125    | 1         | 0            | 0.371098  |
| 0.5      | 0        | 0.308068  | -1           | 0.308068  |
| 0.16667  | 0.08333  | 0.353387  | 0.999995672  | 0.198892  |
| 11.5888  | 4        | 0.143333  | -55.11962409 | 0.545141  |
| 0.0002   | 3.33E-16 | 0.308068  | #NUM!        | 1         |
| 0.75     | 1.75     | 0.770719  | -1.584962501 | 0.409302  |
| 0.82953  | 7.97E-11 | 0.307978  | #NUM!        | 1         |
| 5.33333  | 1        | 0.695331  | -0.476438397 | 0.474869  |
| 7.04E-36 | 5.22E-25 | ?         | #NUM!        | ?         |
| 2        | 2.49998  | 0.46629   | -3.584959615 | 0.367198  |
| 0        | 0        | 0.308068  | #DIV/0!      | 0.308068  |
| 0        | 0        | ?         | #DIV/0!      | ?         |
| 2.89952  | 0.84127  | 0.394512  | -1.661346021 | 0.972293  |
| 2        | 0        | 0.308068  | #NUM!        | 1         |
| 0.75     | 0.5      | 0.3832    | #NUM!        | 0.545627  |
| 1        | 0.5      | 0.651448  | -1           | 1         |
| 2.89952  | 0.84127  | 0.394512  | -1.661346021 | 0.972293  |
| 3.5      | 0.5      | 0.0730972 | #NUM!        | 0.724378  |
| 0.475    | 0.125    | 1         | 0            | 0.371098  |
| 0        | 0        | ?         | #DIV/0!      | ?         |
| 0.75     | 0.5      | 0.3832    | #NUM!        | 0.545627  |
| 0.25     | 0        | 1         | 0            | 0.450185  |
| 0        | 0        | ?         | #DIV/0!      | ?         |
| 0        | 0        | ?         | #DIV/0!      | ?         |
| 1.25     | 0.25     | 0.706667  | -0.736965594 | 0.706667  |
| 1.25     | 0.25     | 0.706667  | -0.736965594 | 0.706667  |
| 1.3      | 0.5      | 0.75747   | -0.378511623 | 0.612327  |
| 0        | 0        | ?         | #DIV/0!      | ?         |

|          |          |          |              |          |
|----------|----------|----------|--------------|----------|
| 1.25     | 0.25     | 0.706667 | -0.736965594 | 0.706667 |
| 0        | 0        | ?        | #DIV/0!      | ?        |
| 1.3      | 0.5      | 0.75747  | -0.378511623 | 0.612327 |
| 1.25     | 0.25     | 0.706667 | -0.736965594 | 0.706667 |
| 0        | 0        | ?        | #DIV/0!      | ?        |
| 0        | 0        | 0.308068 | #DIV/0!      | 0.308068 |
| 0        | 0        | ?        | #DIV/0!      | ?        |
| 0.69045  | 0.42857  | 0.207987 | #NUM!        | 0.393946 |
| 1.08333  | 1.05E-12 | 0.36178  | -3.08205753  | 0.894833 |
| 0.69045  | 0.42857  | 0.207987 | #NUM!        | 0.393946 |
| 1        | 5        | 0.791627 | 1            | 0.450185 |
| 1        | 0        | 0.308068 | #NUM!        | 1        |
| 0.475    | 0.125    | 1        | 0            | 0.371098 |
| 0.69045  | 0.42857  | 0.207987 | #NUM!        | 0.393946 |
| 0        | 0        | ?        | #DIV/0!      | ?        |
| 0.69045  | 0.42857  | 0.207987 | #NUM!        | 0.393946 |
| 0        | 0        | 0.308068 | #DIV/0!      | 0.308068 |
| 0        | 0        | ?        | #DIV/0!      | ?        |
| 0        | 0        | ?        | #DIV/0!      | ?        |
| 0        | 0        | ?        | #DIV/0!      | ?        |
| 12.832   | 9.99609  | 0.761531 | -0.256375981 | 0.912966 |
| 0.25     | 0        | 0.308068 | #NUM!        | 1        |
| 1.25     | 0.75     | 0.862169 | 0.263034406  | 0.610398 |
| 1.25     | 0.75     | 0.862169 | 0.263034406  | 0.610398 |
| 0.25     | 0        | 0.308068 | #NUM!        | 1        |
| 0        | 0        | ?        | #DIV/0!      | ?        |
| 1.3      | 0.5      | 0.75747  | -0.378511623 | 0.612327 |
| 1.41667  | 0        | 0.416152 | -1.502503735 | 0.643189 |
| 0        | 0        | ?        | #DIV/0!      | ?        |
| 0        | 0        | ?        | #DIV/0!      | ?        |
| 0        | 0        | ?        | #DIV/0!      | ?        |
| 0        | 0        | ?        | #DIV/0!      | ?        |
| 0        | 0        | ?        | #DIV/0!      | ?        |
| 5.25E-10 | 0.5      | 0.825659 | 27.50501345  | 0.407544 |
| 0        | 0.5      | 1        | #DIV/0!      | 0.308068 |
| 0        | 0        | ?        | #DIV/0!      | ?        |
| 1.5      | 1.7      | 0.468581 | -1.584962501 | 0.393854 |
| 1.5      | 1.7      | 0.468581 | -1.584962501 | 0.393854 |
| 0        | 0        | 0.308068 | #DIV/0!      | 0.308068 |
| 7        | 1.5      | 0.340116 | -3.807354922 | 0.872889 |
| 0        | 0        | ?        | #DIV/0!      | ?        |
| 0.75     | 0        | 0.308068 | #NUM!        | 1        |
| 1.5      | 1.7      | 0.468581 | -1.584962501 | 0.393854 |
| 0.475    | 0.125    | 1        | 0            | 0.371098 |
| 0        | 0        | ?        | #DIV/0!      | ?        |
| 0        | 0        | ?        | #DIV/0!      | ?        |
| 15.7857  | 5.18182  | 0.416041 | -2.477971312 | 0.875363 |
| 0        | 0        | ?        | #DIV/0!      | ?        |
| 20       | 3.5      | 0.138737 | -1.862496476 | 0.800143 |
| 36.5     | 7.5      | 0.901367 | 0.132103536  | 0.299635 |
| 3        | 6        | 0.209624 | 1.115477217  | 0.834708 |
| 5.33333  | 1        | 0.695331 | -0.476438397 | 0.474869 |
| 1.3      | 0.5      | 0.75747  | -0.378511623 | 0.612327 |
| 0.5      | 0        | 0.308068 | #NUM!        | 1        |
| 0        | 0        | ?        | #DIV/0!      | ?        |
| 1.3      | 0.5      | 0.75747  | -0.378511623 | 0.612327 |

|         |          |           |              |           |
|---------|----------|-----------|--------------|-----------|
| 1.35    | 0.32     | 0.504286  | -1.130395857 | 0.779557  |
| 7.37699 | 1.43939  | 0.457309  | -1.873785448 | 0.933245  |
| 0       | 0        | ?         | #DIV/0!      | ?         |
| 0.69045 | 0.42857  | 0.207987  | #NUM!        | 0.393946  |
| 0.69045 | 0.42857  | 0.207987  | #NUM!        | 0.393946  |
| 1.41667 | 0        | 0.416152  | -1.502503735 | 0.643189  |
| 0       | 0        | ?         | #DIV/0!      | ?         |
| 0       | 0        | ?         | #DIV/0!      | ?         |
| 0       | 0        | ?         | #DIV/0!      | ?         |
| 0       | 0        | ?         | #DIV/0!      | ?         |
| 4.5     | 5.5      | 0.593125  | -0.584962501 | 0.393741  |
| 0.66667 | 0        | 0.308068  | #NUM!        | 1         |
| 12.832  | 9.99609  | 0.761531  | -0.256375981 | 0.912966  |
| 12.832  | 9.99609  | 0.761531  | -0.256375981 | 0.912966  |
| 0       | 0        | ?         | #DIV/0!      | ?         |
| 0.58333 | 0.75     | 0.113502  | -2.807354675 | 0.0598224 |
| 9       | 1.5      | 0.457279  | -1.847996907 | 0.904117  |
| 7.37699 | 1.43939  | 0.457309  | -1.873785448 | 0.933245  |
| 7.37699 | 1.43939  | 0.457309  | -1.873785448 | 0.933245  |
| 0.76466 | 3.25     | 0.927706  | -0.612894086 | 0.381167  |
| 6       | 2        | 0.0605164 | -3.584962501 | 0.481309  |
| 4       | 1        | 0.604181  | -1           | 0.791627  |
| 0.02617 | 9.25E-11 | 0.308068  | #NUM!        | 1         |
| 0.02617 | 9.25E-11 | 0.308068  | #NUM!        | 1         |
| 1.75    | 2.4      | 0.82454   | -0.544320516 | 0.634367  |
| 0.16667 | 0.08333  | 0.353387  | 0.999995672  | 0.198892  |
| 0       | 0        | ?         | #DIV/0!      | ?         |
| 0       | 0        | ?         | #DIV/0!      | ?         |
| 0       | 0        | ?         | #DIV/0!      | ?         |
| 0       | 0        | ?         | #DIV/0!      | ?         |
| 0       | 0        | ?         | #DIV/0!      | ?         |
| 0       | 0        | ?         | #DIV/0!      | ?         |
| 0       | 0        | ?         | #DIV/0!      | ?         |
| 0       | 0        | 0.308068  | #DIV/0!      | 0.308068  |
| 0.5     | 0.2      | 0.999398  | 0.001416031  | 0.650792  |
| 0       | 0        | ?         | #DIV/0!      | ?         |
| 0       | 0        | ?         | #DIV/0!      | ?         |
| 0.5     | 0.2      | 0.254288  | 2.999823259  | 0.224206  |
| 5.33333 | 1        | 0.695331  | -0.476438397 | 0.474869  |
| 0.5     | 1        | 0.622002  | #NUM!        | 0.353387  |
| 0.25    | 4.44E-16 | 1         | 0            | 0.450185  |
| 0       | 0        | ?         | #DIV/0!      | ?         |
| 0       | 0        | ?         | #DIV/0!      | ?         |
| 0       | 0        | ?         | #DIV/0!      | ?         |
| 24      | 22       | 0.640477  | -0.830074999 | 0.703395  |
| 97      | 96.5     | 0.847023  | 0.276604104  | 0.843366  |
| 14.5    | 15.5     | 0.865841  | -0.398549376 | 0.82834   |
| 45      | 47.5     | 0.796217  | -0.514573173 | 0.760142  |
| 83      | 58.5     | 0.558994  | -0.330645312 | 0.791304  |
| 14      | 19.5     | 0.830457  | -0.559427409 | 0.639798  |
| 105.5   | 78.5     | 0.789586  | -0.463711346 | 0.985218  |
| 90.5    | 98.5     | 0.659097  | 0.748081626  | 0.699886  |
| 22297   | 16245.7  | 0.666138  | -0.516108388 | 0.965815  |
| 219.5   | 212      | 0.912594  | 0.119768326  | 0.878452  |
| 222.5   | 199.5    | 0.909341  | 0.112231558  | 0.796369  |
| 273     | 259      | 0.844111  | 0.290947152  | 0.809309  |

|          |          |           |              |          |
|----------|----------|-----------|--------------|----------|
| 292.5    | 258      | 0.610513  | 0.495957495  | 0.518389 |
| 46.5     | 30.5     | 0.525229  | -0.561878888 | 0.964886 |
| 431.5    | 184.5    | 0.502373  | -0.736408461 | 0.764225 |
| 199      | 248      | 0.791527  | -0.608718624 | 0.654321 |
| 140.5    | 106      | 0.787474  | -0.295222532 | 0.929334 |
| 71759.5  | 79224    | 0.903418  | -0.249170764 | 0.841141 |
| 33       | 29       | 0.848896  | -0.289506617 | 0.949206 |
| 30198    | 25449    | 0.723952  | -0.409093869 | 0.896917 |
| 26       | 17.5     | 0.29657   | -0.452512205 | 0.804574 |
| 69.1107  | 46.4452  | 0.544352  | -1.156747919 | 0.800266 |
| 59.3993  | 54.2608  | 0.610646  | -0.908705449 | 0.67574  |
| 73.3509  | 57.0601  | 0.777691  | -0.415183708 | 0.974608 |
| 2        | 1.5      | 0.116158  | #NUM!        | 0.198892 |
| 0        | 0        | ?         | #DIV/0!      | ?        |
| 0        | 0        | ?         | #DIV/0!      | ?        |
| 0        | 0        | ?         | #DIV/0!      | ?        |
| 0        | 0        | ?         | #DIV/0!      | ?        |
| 325.501  | 297.499  | 0.990347  | -0.020088678 | 0.949652 |
| 49       | 46.5     | 0.354051  | -2.091147888 | 0.382505 |
| 2.5      | 4.62524  | 0.749864  | 0.678071905  | 0.893436 |
| 5.23656  | 5.47779  | 0.959567  | -0.091812546 | 0.929456 |
| 1843.5   | 1617.5   | 0.731394  | -0.461291456 | 0.848545 |
| 1        | 1.5      | 1         | 0            | 0.785812 |
| 1.27419  | 1.38098  | 0.19084   | 2.499420013  | 0.196837 |
| 6.15199  | 20.6616  | 0.46609   | 1.781327948  | 0.980188 |
| 0        | 0        | ?         | #DIV/0!      | ?        |
| 2.69405  | 4.00057  | 0.625052  | -2.30995833  | 0.447197 |
| 1.99268  | 0.66746  | 0.827815  | 0.409713547  | 0.524963 |
| 1.02441  | 2.90149  | 0.710813  | -22.21451765 | 0.331779 |
| 87.6041  | 85.1734  | 0.867093  | -0.322471241 | 0.885288 |
| 1243.5   | 1152     | 0.416611  | -2.174282284 | 0.45728  |
| 514      | 523.5    | 0.630995  | -0.72022233  | 0.615745 |
| 577      | 515.5    | 0.443107  | -2.277609745 | 0.501051 |
| 60.5     | 52.5     | 0.866261  | -0.289506617 | 0.963274 |
| 1.82227  | 2.35364  | 0.493133  | -33.07009828 | 0.388831 |
| 16.6694  | 9.53643  | 0.54487   | -0.972152937 | 0.936467 |
| 0        | 1.90E-27 | ?         | #DIV/0!      | ?        |
| 2.54456  | 1.01019  | 0.318887  | -1.293387403 | 0.983729 |
| 0        | 0        | ?         | #DIV/0!      | ?        |
| 0        | 0        | 0.308068  | #DIV/0!      | 0.308068 |
| 259.119  | 174.899  | 0.0172555 | -1.33280652  | 0.114046 |
| 12.0998  | 14.7092  | 0.785051  | 0.409395705  | 0.92505  |
| 70.4532  | 77.6435  | 0.822675  | -0.33737258  | 0.739975 |
| 3.58E-42 | 3.92E-41 | ?         | 12.82297225  | ?        |
| 48.5     | 47       | 0.750688  | -0.555518723 | 0.77374  |
| 5.02577  | 3.67517  | 0.731395  | -0.363608378 | 0.942941 |
| 1        | 2        | 0.436998  | 2.321928095  | 0.550362 |
| 96       | 75.5     | 0.499788  | -1.227410496 | 0.664017 |
| 1.5      | 6.07E-30 | 0.822295  | 0.415037499  | 0.399441 |
| 60.5     | 44       | 0.773299  | 0.464841055  | 0.625955 |
| 3.03E-18 | 2.33E-19 | ?         | -7.435115874 | ?        |
| 157.5    | 165      | 0.229072  | -1.345011708 | 0.20271  |
| 226.251  | 256.91   | 0.948899  | 0.110410767  | 0.96402  |
| 154.512  | 166.446  | 0.850292  | -0.376260337 | 0.80136  |
| 0        | 0        | ?         | #DIV/0!      | ?        |
| 1.56E-11 | 5.13E-08 | 0.999593  | 1.312692139  | 0.308371 |

|          |         |            |              |             |
|----------|---------|------------|--------------|-------------|
| 565.5    | 543     | 0.720606   | -0.355480655 | 0.769018    |
| 2.92055  | 7.35834 | 0.00355761 | -26.93122065 | 0.000232018 |
| 355      | 336     | 0.704108   | -0.601310495 | 0.747905    |
| 2.90279  | 2.32359 | 0.646242   | 0.718272007  | 0.553306    |
| 45.5699  | 79.3783 | 0.900708   | 0.307033182  | 0.791649    |
| 279.5    | 258.5   | 0.979302   | -0.033947332 | 0.95386     |
| 70       | 59.5    | 0.786271   | -0.415037499 | 0.913122    |
| 0        | 0       | ?          | #DIV/0!      | ?           |
| 5279.87  | 4709.39 | 0.781416   | -0.387744248 | 0.879943    |
| 8.17095  | 9.48288 | 0.74737    | 0.655582044  | 0.815527    |
| 105.356  | 92.4061 | 0.894004   | -0.192713938 | 0.998189    |
| 0        | 0       | ?          | #DIV/0!      | ?           |
| 1.04E-13 | 1.69584 | 1          | -8.834911083 | 0.308068    |
| 0        | 0       | ?          | #DIV/0!      | ?           |
| 4.6147   | 3.78125 | 0.949403   | 0.115691233  | 0.841454    |
| 29       | 23.5    | 0.418669   | -2.273018494 | 0.528069    |
| 8.19808  | 8.12054 | 0.811178   | 0.3638987    | 0.805145    |
| 2442.72  | 2203.97 | 0.644548   | -0.451522185 | 0.766403    |
| 6.35E-28 | 0.21329 | 1          | 58.77468145  | 0.308068    |
| 663.221  | 685.522 | 0.494985   | -1.559981526 | 0.475205    |
| 1059.5   | 1014.5  | 0.0942221  | -0.783552826 | 0.117994    |
| 0.5      | 1.04661 | 0.716028   | 1            | 0.972608    |
| 435.438  | 410.455 | 0.796938   | -0.320634041 | 0.854173    |
| 62.6517  | 41.9621 | 0.844975   | -0.289756612 | 0.873252    |
| 11.0781  | 6.61501 | 0.655971   | -0.699139312 | 0.982256    |
| 724.5    | 688     | 0.583661   | -0.602996424 | 0.637794    |
| 9.65E-06 | 0       | 0.308072   | 16.66131025  | 0.308068    |
| 39.8925  | 33.5655 | 0.994455   | 0.011917497  | 0.889001    |
| 1.23E-20 | 0       | 0.308068   | 57.73478232  | 0.308068    |
| 0        | 0       | ?          | #DIV/0!      | ?           |
| 1        | 0.5     | 0.353387   | #NUM!        | 0.622002    |
| 199.324  | 231.843 | 0.922471   | 0.187341694  | 0.986279    |
| 49.5717  | 39.2094 | 0.737854   | -0.509364384 | 0.919969    |
| 0        | 0.5     | 0.353387   | #DIV/0!      | 0.622002    |
| 0        | 0       | ?          | #DIV/0!      | ?           |
| 1631.75  | 1704.35 | 0.851462   | -0.299720116 | 0.817114    |
| 5.06E-05 | 2.2929  | 0.99992    | 2.3267049    | 0.308112    |
| 19.6953  | 42.879  | 0.909146   | 0.341176858  | 0.700682    |
| 9888.5   | 10124.5 | 0.52925    | -0.591616099 | 0.502674    |
| 35       | 31      | 0.714107   | -0.703018262 | 0.795285    |
| 0.5      | 2       | 0.785812   | #NUM!        | 0.320255    |
| 3.74E-07 | 0       | 0.308068   | -55.44791392 | 1           |
| 0        | 0       | ?          | #DIV/0!      | ?           |
| 344.5    | 413     | 0.660105   | -0.637197284 | 0.504062    |
| 0.5      | 1       | 0.710482   | 1            | 1           |
| 7        | 11      | 0.738539   | -1.222392421 | 0.516992    |
| 0        | 0       | ?          | #DIV/0!      | ?           |
| 1        | 0.5     | 0.353387   | #NUM!        | 0.622002    |
| 0        | 0       | ?          | #DIV/0!      | ?           |
| 0.5      | 0.5     | 0.450185   | #NUM!        | 0.450185    |
| 1009     | 1225.5  | 0.97356    | 0.068413453  | 0.909895    |
| 0        | 0       | ?          | #DIV/0!      | ?           |
| 588.5    | 545.5   | 0.551066   | -1.159239453 | 0.602031    |
| 0        | 0       | ?          | #DIV/0!      | ?           |
| 27.5     | 27.5    | 0.789583   | -0.571906348 | 0.789583    |
| 20       | 16.5    | 0.603133   | -0.736965594 | 0.766012    |

|          |         |           |              |           |
|----------|---------|-----------|--------------|-----------|
| 0.5      | 0       | 0.308068  | #NUM!        | 1         |
| 1.5      | 4       | 0.717686  | -1.584962501 | 0.258505  |
| 0        | 0       | ?         | #DIV/0!      | ?         |
| 0        | 0       | ?         | #DIV/0!      | ?         |
| 2        | 12      | 0.450185  | #NUM!        | 0.0138468 |
| 0        | 0.5     | 1         | #DIV/0!      | 0.308068  |
| 6        | 7       | 0.949127  | -0.108376025 | 0.833715  |
| 1.5      | 1       | 0.3832    | #NUM!        | 0.545627  |
| 5        | 3.5     | 1         | 0            | 0.767557  |
| 688.947  | 687.187 | 0.838118  | -0.313530803 | 0.84019   |
| 0        | 0       | ?         | #DIV/0!      | ?         |
| 1        | 0.5     | 0.651448  | -1           | 1         |
| 24       | 21.5    | 0.929514  | 0.142957954  | 0.859885  |
| 0        | 0.5     | 0.0733429 | #DIV/0!      | 0.220868  |
| 0        | 0       | ?         | #DIV/0!      | ?         |
| 11       | 8.5     | 0.754372  | 0.447458977  | 0.616366  |
| 132      | 212.5   | 0.735749  | -1.101879614 | 0.485628  |
| 2.47E-15 | 0.68973 | 0.999977  | 32.71669402  | 0.308078  |
| 1        | 2       | 0.806588  | -1           | 0.481309  |
| 0.5      | 1.5     | 0.513713  | 1.584962501  | 1         |
| 4        | 6.5     | 0.869939  | -0.415037499 | 0.577083  |
| 0        | 0       | ?         | #DIV/0!      | ?         |
| 57.5     | 62.5    | 0.576359  | 1.043253198  | 0.606389  |
| 0        | 0       | ?         | #DIV/0!      | ?         |
| 255.5    | 214.5   | 0.782367  | -0.389849167 | 0.928592  |
| 974.5    | 1190.5  | 0.997453  | 0.006646674  | 0.880991  |
| 475      | 445     | 0.799156  | -0.430304256 | 0.847245  |
| 0        | 0       | ?         | #DIV/0!      | ?         |
| 87       | 65.5    | 0.526929  | -1.398549376 | 0.696513  |
| 1.5      | 0.5     | 0.0805096 | #NUM!        | 0.450185  |
| 29       | 52.5    | 0.992112  | -0.025090981 | 0.642042  |
| 63       | 65      | 0.710206  | -0.911190733 | 0.692063  |
| 0.5      | 0.5     | 0.513713  | 1.584962501  | 0.513713  |
| 8.5      | 9       | 0.657163  | -0.765534746 | 0.613954  |
| 0        | 0       | ?         | #DIV/0!      | ?         |
| 72       | 55.5    | 0.792221  | 0.407503827  | 0.657787  |
| 2        | 2       | 0.651448  | -1           | 0.651448  |
| 2        | 1.5     | 0.774348  | 0.584962501  | 0.670131  |
| 0        | 0       | ?         | #DIV/0!      | ?         |
| 4        | 3.5     | 1         | 0            | 0.904922  |
| 0        | 0       | ?         | #DIV/0!      | ?         |
| 2        | 0.5     | 0.630057  | -1           | 0.806588  |
| 0        | 0       | 0.308068  | #DIV/0!      | 0.308068  |
| 0        | 0       | ?         | #DIV/0!      | ?         |
| 0        | 0       | ?         | #DIV/0!      | ?         |
| 47       | 45      | 0.874522  | 0.315775868  | 0.85306   |
| 0        | 0       | ?         | #DIV/0!      | ?         |
| 0        | 0       | ?         | #DIV/0!      | ?         |
| 0.5      | 0       | 0.308068  | #NUM!        | 1         |
| 0        | 0       | ?         | #DIV/0!      | ?         |
| 0        | 0       | ?         | #DIV/0!      | ?         |
| 0        | 0       | ?         | #DIV/0!      | ?         |
| 0        | 0       | ?         | #DIV/0!      | ?         |
| 94.0001  | 101.5   | 0.986336  | 0.030370611  | 0.962439  |
| 0.00023  | 0.00393 | 0.309227  | 8.606485677  | 0.326267  |
| 0        | 0       | 0.308068  | #DIV/0!      | 0.308068  |

|         |         |          |              |          |
|---------|---------|----------|--------------|----------|
| 11.5    | 18      | 0.978598 | 0.061400545  | 0.749855 |
| 0.5     | 0.5     | 0.450185 | #NUM!        | 0.450185 |
| 2       | 2       | 0.756486 | -0.415037499 | 0.756486 |
| 656.5   | 383     | 0.79502  | 0.446286471  | 0.584996 |
| 41.5    | 52      | 0.79747  | -0.620151929 | 0.661985 |
| 130.221 | 135.414 | 0.456402 | -1.365852826 | 0.43061  |
| 0       | 0       | ?        | #DIV/0!      | ?        |
| 1.5     | 1       | 0.3832   | #NUM!        | 0.545627 |
| 154.5   | 154     | 0.840853 | -0.394946081 | 0.84296  |
| 17.5578 | 14.9367 | 0.548173 | -1.408035154 | 0.643266 |
| 2       | 3       | 1        | 0            | 0.785812 |
| 441.5   | 442.5   | 0.53119  | -1.034725569 | 0.529504 |
| 0       | 0       | 0.308068 | #DIV/0!      | 0.308068 |
| 0       | 0       | ?        | #DIV/0!      | ?        |
| 1       | 2       | 0.622002 | #NUM!        | 0.353387 |
| 0       | 0       | ?        | #DIV/0!      | ?        |
| 0       | 1       | 0.622002 | #DIV/0!      | 0.622002 |
| 7.5     | 2.5     | 0.152838 | -1.906890596 | 0.873517 |
| 11.5    | 16      | 0.851723 | -0.353636955 | 0.608589 |
| 9.5     | 46      | 0.891044 | 0.658963082  | 0.462805 |
| 105     | 111.5   | 0.359846 | -1.206450877 | 0.317546 |
| 1       | 1       | 1        | 0            | 1        |
| 0       | 0       | ?        | #DIV/0!      | ?        |
| 3       | 5.5     | 0.725181 | -1.584962501 | 0.448923 |
| 1       | 1       | 0.785812 | 0.584962501  | 0.785812 |
| 0       | 0       | ?        | #DIV/0!      | ?        |
| 0       | 0       | ?        | #DIV/0!      | ?        |
| 0       | 0.5     | 1        | #DIV/0!      | 0.308068 |
| 32.5    | 32      | 0.677556 | -0.812914447 | 0.688123 |
| 16.5    | 3.5     | 0.659159 | -0.289506617 | 0.202468 |
| 0       | 0       | ?        | #DIV/0!      | ?        |
| 8.5     | 14.5    | 0.568955 | -1.765534746 | 0.291911 |
| 0       | 0       | ?        | #DIV/0!      | ?        |
| 104.5   | 125     | 0.904585 | 0.2526428    | 0.997606 |
| 14      | 12.5    | 0.734225 | -0.347923303 | 0.864102 |
| 24      | 33      | 0.977247 | -0.061400545 | 0.77713  |
| 316.5   | 254.5   | 0.728153 | -0.387198452 | 0.952971 |
| 797.5   | 673.5   | 0.682884 | -0.604541746 | 0.82162  |
| 499     | 473.5   | 0.870423 | -0.299337901 | 0.905454 |
| 0.74677 | 2.50638 | 0.983089 | -0.101605544 | 0.472205 |
| 13.0584 | 13      | 0.965003 | -0.063050044 | 0.968663 |
| 0       | 0       | ?        | #DIV/0!      | ?        |
| 589     | 592.5   | 0.941586 | -0.136034633 | 0.937741 |
| 0       | 0       | ?        | #DIV/0!      | ?        |
| 17.5    | 21.5    | 0.69454  | -0.544320516 | 0.509197 |
| 312.5   | 223.5   | 0.857324 | 0.196103398  | 0.603433 |
| 219.5   | 219     | 0.908883 | -0.196876548 | 0.910499 |
| 52.0075 | 53.6611 | 0.897341 | -0.210738826 | 0.87361  |
| 280     | 259     | 0.818111 | -0.331621491 | 0.883588 |
| 46.5    | 13.5    | 0.705193 | 0.343484238  | 0.226952 |
| 3.5     | 8.5     | 0.912312 | 0.362570079  | 0.664901 |
| 5       | 8.5     | 0.871819 | 0.378511623  | 0.829986 |
| 132     | 188.5   | 0.684041 | -0.407769499 | 0.306713 |
| 0       | 0       | ?        | #DIV/0!      | ?        |
| 0       | 0       | ?        | #DIV/0!      | ?        |
| 1177.09 | 1115.01 | 0.453352 | -1.282020493 | 0.491084 |



|          |         |          |              |           |
|----------|---------|----------|--------------|-----------|
| 2        | 3       | 0.353387 | #NUM!        | 0.198892  |
| 312.5    | 231     | 0.883432 | -0.240588467 | 0.918412  |
| 1        | 1       | 0.710482 | -1           | 0.710482  |
| 0        | 0       | ?        | #DIV/0!      | ?         |
| 0        | 0       | ?        | #DIV/0!      | ?         |
| 0.5      | 3       | 0.741917 | 1.584962501  | 0.625646  |
| 0        | 0.5     | 1        | #DIV/0!      | 0.308068  |
| 69.9196  | 74.1221 | 0.915679 | -0.190935269 | 0.875234  |
| 9        | 6.5     | 0.67623  | -0.710493383 | 0.903569  |
| 0        | 0       | ?        | #DIV/0!      | ?         |
| 3        | 1.5     | 0.267367 | -1.584962501 | 0.756486  |
| 0.5      | 0       | 0.308068 | #NUM!        | 1         |
| 4        | 5       | 0.904922 | -0.192645078 | 0.722932  |
| 0.5      | 1.5     | 0.450185 | #NUM!        | 0.0805096 |
| 0.5      | 0.5     | 0.450185 | #NUM!        | 0.450185  |
| 4        | 2.5     | 0.914417 | -0.192645078 | 0.830364  |
| 2        | 0.5     | 0.116158 | #NUM!        | 0.622002  |
| 0        | 0       | ?        | #DIV/0!      | ?         |
| 0        | 0       | 0.308068 | #DIV/0!      | 0.308068  |
| 263.5    | 254.5   | 0.681031 | -0.788993719 | 0.704943  |
| 0        | 2       | 1        | #DIV/0!      | 0.308068  |
| 69       | 61      | 0.832272 | -0.380604002 | 0.915397  |
| 596      | 588     | 0.747854 | -0.626711483 | 0.756981  |
| 1.5      | 4       | 0.595411 | 1.584962501  | 0.927607  |
| 0        | 0       | ?        | #DIV/0!      | ?         |
| 0        | 0       | ?        | #DIV/0!      | ?         |
| 0        | 0       | ?        | #DIV/0!      | ?         |
| 276.202  | 262.525 | 0.917881 | 0.137037147  | 0.877494  |
| 98       | 135.5   | 0.955037 | -0.122856748 | 0.750712  |
| 211      | 274.5   | 0.993677 | -0.017195615 | 0.834943  |
| 1        | 0       | 0.622002 | -1           | 0.622002  |
| 3        | 7       | 0.874747 | -0.584962501 | 0.454215  |
| 0.5      | 1       | 1        | 0            | 0.651448  |
| 41       | 36      | 0.856514 | -0.313157885 | 0.945796  |
| 49       | 45      | 0.961788 | -0.091147888 | 0.987256  |
| 671      | 601.5   | 0.96541  | -0.06598841  | 0.954473  |
| 1        | 0       | 0.308068 | #NUM!        | 1         |
| 1.5      | 1       | 0.3832   | #NUM!        | 0.545627  |
| 3.5      | 6       | 0.815802 | -0.807354922 | 0.546526  |
| 1.5      | 1       | 0.785812 | -0.584962501 | 1         |
| 0.5      | 0.5     | 0.450185 | #NUM!        | 0.450185  |
| 8.83E-05 | 2.1895  | 0.999992 | -0.348380738 | 0.308081  |
| 1        | 0       | 0.622002 | -1           | 0.622002  |
| 0        | 0       | ?        | #DIV/0!      | ?         |
| 0.5      | 0.5     | 0.450185 | 2            | 0.450185  |
| 3.5      | 4.5     | 0.561851 | 1.099535674  | 0.659159  |
| 53       | 63.5    | 0.829306 | -0.388070452 | 0.694598  |
| 0.5      | 0.5     | 1        | 0            | 1         |
| 0.35098  | 0.70206 | 0.621963 | #NUM!        | 0.353278  |
| 0        | 0       | ?        | #DIV/0!      | ?         |
| 57.5     | 38.5    | 0.640818 | -0.868210127 | 0.898105  |
| 1624     | 2822.5  | 0.883722 | 0.306207637  | 0.758047  |
| 6        | 6       | 0.853306 | -0.263034406 | 0.853306  |
| 215.5    | 193.5   | 0.80445  | -0.342153123 | 0.897813  |
| 7        | 9       | 0.960276 | 0.099535674  | 0.881442  |
| 1        | 2       | 0.622002 | -1           | 0.198892  |

|         |         |          |              |           |
|---------|---------|----------|--------------|-----------|
| 0.5     | 0       | 0.308068 | #NUM!        | 1         |
| 8.5     | 10      | 0.86583  | 0.371968777  | 0.945995  |
| 0.5     | 0.5     | 0.450185 | #NUM!        | 0.450185  |
| 32      | 26.5    | 0.936533 | 0.087462841  | 0.767004  |
| 0       | 0       | ?        | #DIV/0!      | ?         |
| 0       | 0       | ?        | #DIV/0!      | ?         |
| 4       | 4.5     | 0.596819 | -1           | 0.514418  |
| 0       | 0.5     | 1        | #DIV/0!      | 0.308068  |
| 1.5     | 0       | 0.495025 | -1.584962501 | 0.724378  |
| 481     | 428     | 0.411678 | -2.466949588 | 0.470711  |
| 0.5     | 1.5     | 0.450185 | #NUM!        | 0.0805096 |
| 0       | 0       | ?        | #DIV/0!      | ?         |
| 828.502 | 695.001 | 0.852274 | -0.30311778  | 0.97769   |
| 1       | 2       | 0.834708 | 0.584962501  | 0.834708  |
| 3       | 3.5     | 0.393741 | -2.584962501 | 0.318932  |
| 311     | 358.5   | 0.868746 | -0.30635618  | 0.767629  |
| 8.38464 | 5.51897 | 0.908006 | -0.167007596 | 0.806726  |
| 24.6154 | 26.9843 | 0.800877 | -0.529840215 | 0.741584  |
| 3       | 3.5     | 0.914417 | -0.263034406 | 0.830364  |
| 0       | 0       | ?        | #DIV/0!      | ?         |
| 4.5     | 1.5     | 0.19041  | -1.584962501 | 1         |
| 845.5   | 753     | 0.619147 | -0.968773442 | 0.696962  |
| 512     | 477     | 0.675023 | -0.766380323 | 0.725232  |
| 5       | 6       | 0.522418 | 0.925999419  | 0.61358   |
| 281.5   | 293     | 0.989368 | -0.025855442 | 0.964932  |
| 6       | 9       | 0.788664 | -0.777607579 | 0.565162  |
| 0       | 0.5     | 1        | #DIV/0!      | 0.308068  |
| 2.08621 | 0.54612 | 0.902875 | -0.226448229 | 0.625833  |
| 20      | 44      | 0.939255 | -0.234465254 | 0.510408  |
| 14.5    | 11.5    | 0.866733 | -0.334419039 | 1         |
| 232     | 194.5   | 0.493215 | -0.728697978 | 0.676185  |
| 2.5     | 1.5     | 0.236154 | -2.321928095 | 0.513713  |
| 7.5     | 18.5    | 0.556415 | -2.906890596 | 0.173665  |
| 167     | 149.5   | 0.966195 | 0.063378934  | 0.88785   |
| 111.5   | 81.5    | 0.61898  | -0.469983022 | 0.986895  |
| 0       | 0       | ?        | #DIV/0!      | ?         |
| 0       | 0       | ?        | #DIV/0!      | ?         |
| 3.5     | 6       | 0.943913 | 0.192645078  | 0.779894  |
| 1       | 0       | 0.622002 | -1           | 0.622002  |
| 515.002 | 593.495 | 0.908201 | -0.20915908  | 0.806887  |
| 2       | 0       | 0.308068 | #NUM!        | 1         |
| 4.5     | 2.5     | 0.26366  | -3.169925001 | 0.541977  |
| 2412.5  | 2997.5  | 0.620548 | -0.396715744 | 0.34983   |
| 1       | 4.5     | 0.907467 | 0.584962501  | 0.503591  |
| 398.5   | 379     | 0.967211 | -0.068580306 | 0.998227  |
| 0       | 0       | ?        | #DIV/0!      | ?         |
| 348     | 313     | 0.920401 | -0.19739079  | 0.982965  |
| 2.5     | 3       | 0.564258 | 1.378511623  | 0.611386  |
| 766     | 723     | 0.887419 | 0.254849773  | 0.855212  |
| 0       | 0       | ?        | #DIV/0!      | ?         |
| 47      | 37.5    | 0.723885 | -0.532221039 | 0.902028  |
| 0       | 0       | ?        | #DIV/0!      | ?         |
| 0       | 0       | ?        | #DIV/0!      | ?         |
| 89      | 67      | 0.760925 | -0.346450414 | 0.961352  |
| 0       | 0       | ?        | #DIV/0!      | ?         |
| 0       | 0       | ?        | #DIV/0!      | ?         |

|         |         |           |              |          |
|---------|---------|-----------|--------------|----------|
| 101     | 69      | 0.608234  | -0.715696977 | 0.92057  |
| 24.5    | 29.5    | 0.900682  | -0.292781749 | 0.793217 |
| 0       | 0       | ?         | #DIV/0!      | ?        |
| 0       | 0       | ?         | #DIV/0!      | ?        |
| 0       | 0       | ?         | #DIV/0!      | ?        |
| 1       | 1.5     | 0.680109  | 1            | 0.834708 |
| 3       | 2       | 0.710482  | -0.584962501 | 1        |
| 10      | 7       | 0.581926  | -0.862496476 | 0.850639 |
| 36.7624 | 35.5844 | 0.696432  | -0.789804376 | 0.717921 |
| 403.5   | 379     | 0.289456  | -2.516873511 | 0.319932 |
| 1.5     | 3       | 1         | 0            | 0.651448 |
| 0       | 0       | ?         | #DIV/0!      | ?        |
| 62      | 70      | 0.610198  | -0.824913293 | 0.515392 |
| 0       | 0       | ?         | #DIV/0!      | ?        |
| 48.5    | 28      | 0.732617  | 0.529370175  | 0.516897 |
| 0       | 0       | ?         | #DIV/0!      | ?        |
| 6.5     | 10.5    | 0.592371  | -1.115477217 | 0.290556 |
| 0       | 0       | ?         | #DIV/0!      | ?        |
| 225     | 277.5   | 0.665547  | -0.628905848 | 0.485671 |
| 108.104 | 90.7757 | 0.771493  | -0.381276643 | 0.927787 |
| 1146.33 | 1529.51 | 0.886007  | -0.262214578 | 0.670739 |
| 229.954 | 207.59  | 0.75914   | -0.408614855 | 0.851841 |
| 4.5     | 5.5     | 0.941228  | -0.169925001 | 0.825659 |
| 0       | 0       | ?         | #DIV/0!      | ?        |
| 0       | 0       | ?         | #DIV/0!      | ?        |
| 126     | 78      | 0.691603  | -0.593575631 | 0.958449 |
| 0.5     | 0       | 1         | 0            | 0.450185 |
| 0       | 0       | 0.308068  | #DIV/0!      | 0.308068 |
| 0.5     | 1.5     | 0.724378  | #NUM!        | 0.329316 |
| 2       | 9.5     | 0.862169  | -2           | 0.339254 |
| 0       | 0       | ?         | #DIV/0!      | ?        |
| 0       | 0       | ?         | #DIV/0!      | ?        |
| 0       | 0       | ?         | #DIV/0!      | ?        |
| 37.5    | 23      | 0.816669  | -0.421463768 | 0.902529 |
| 0       | 0.5     | 1         | #DIV/0!      | 0.308068 |
| 0       | 0       | ?         | #DIV/0!      | ?        |
| 9.5     | 9       | 0.836892  | -0.440572591 | 0.868995 |
| 0       | 0.5     | 1         | #DIV/0!      | 0.308068 |
| 0       | 0       | ?         | #DIV/0!      | ?        |
| 15      | 19.5    | 0.686228  | -0.819427754 | 0.505785 |
| 1.5     | 1.5     | 0.282794  | 1.415037499  | 0.282794 |
| 0       | 0       | ?         | #DIV/0!      | ?        |
| 0       | 2       | 0.785812  | #DIV/0!      | 0.438509 |
| 2       | 2.5     | 0.617945  | 1.169925001  | 0.687418 |
| 0       | 0       | ?         | #DIV/0!      | ?        |
| 0       | 0       | ?         | #DIV/0!      | ?        |
| 0       | 0       | ?         | #DIV/0!      | ?        |
| 14.5    | 8.5     | 0.0734682 | -1.5360529   | 0.392404 |
| 8       | 9.5     | 0.584027  | -1.415037499 | 0.484655 |
| 57.5    | 66.5    | 0.980661  | 0.049327712  | 0.932431 |
| 31.5    | 34      | 0.89992   | -0.249359469 | 0.850648 |
| 11      | 22      | 1         | 0            | 0.626061 |
| 370     | 326     | 0.642903  | -0.898386263 | 0.727978 |
| 268     | 198.5   | 0.821313  | -0.278186631 | 0.913577 |
| 1.5     | 6.5     | 0.814504  | 1            | 0.592371 |
| 1098.74 | 994.815 | 0.83036   | -0.340121316 | 0.905977 |

|         |         |          |              |           |
|---------|---------|----------|--------------|-----------|
| 21.5    | 20      | 0.900622 | -0.256339753 | 0.943057  |
| 0.5     | 0       | 0.308068 | #NUM!        | 1         |
| 4.5     | 6       | 0.943913 | -0.169925001 | 0.779894  |
| 57.5    | 66      | 0.881293 | 0.24197279   | 0.977262  |
| 659     | 257.5   | 0.199651 | -1.667167129 | 0.867505  |
| 6       | 8       | 0.919687 | 0.222392421  | 0.919687  |
| 9.5     | 12.5    | 0.955787 | 0.074000581  | 0.783095  |
| 7.5     | 8       | 0.186081 | -2.321928095 | 0.161287  |
| 19      | 14.5    | 0.627649 | -0.493040011 | 0.928185  |
| 0       | 0       | 0.308068 | #DIV/0!      | 0.308068  |
| 70      | 74      | 0.662449 | -0.669851398 | 0.616525  |
| 397.416 | 444.284 | 0.334514 | -1.029337795 | 0.2527    |
| 1214.91 | 1378.1  | 0.129012 | -0.859783991 | 0.0736501 |
| 920.5   | 967     | 0.727194 | -0.557407837 | 0.687464  |
| 17.471  | 12.5712 | 0.963226 | -0.048442691 | 0.732565  |
| 0       | 0       | ?        | #DIV/0!      | ?         |
| 115.329 | 111.736 | 0.918493 | 0.200596297  | 0.901594  |
| 5.5     | 6       | 0.747458 | -0.874469118 | 0.700421  |
| 0       | 0       | ?        | #DIV/0!      | ?         |
| 855     | 802.5   | 0.834624 | -0.244925025 | 0.898937  |
| 1       | 0       | 0.18169  | 1.584962501  | 0.0805096 |
| 0       | 0       | ?        | #DIV/0!      | ?         |
| 1       | 1       | 0.450185 | #NUM!        | 0.450185  |
| 0       | 0       | ?        | #DIV/0!      | ?         |
| 0.00139 | 0.06822 | 0.791713 | 3.698398853  | 0.447685  |
| 0       | 0       | ?        | #DIV/0!      | ?         |
| 2.5     | 3.5     | 0.415333 | -2.321928095 | 0.252216  |
| 9       | 27      | 1        | 0            | 0.318341  |
| 0       | 0       | ?        | #DIV/0!      | ?         |
| 325.5   | 403.5   | 0.196511 | -0.750323977 | 0.0781329 |
| 39      | 36      | 0.657857 | -0.793549123 | 0.715442  |
| 0       | 0.5     | 0.450185 | #DIV/0!      | 1         |
| 1.5     | 2.5     | 0.837425 | -0.584962501 | 0.550362  |
| 4       | 3       | 0.679547 | -0.678071905 | 0.888898  |
| 0       | 0       | ?        | #DIV/0!      | ?         |
| 1.5     | 3       | 0.499013 | 1.736965594  | 0.69089   |
| 7       | 6       | 0.675463 | 0.716207034  | 0.611696  |
| 0       | 0.5     | 1        | #DIV/0!      | 0.308068  |
| 52.0821 | 56.1224 | 0.654226 | 0.757258451  | 0.689787  |
| 0       | 0       | ?        | #DIV/0!      | ?         |
| 1       | 0       | 0.462019 | 1.807354922  | 0.323864  |
| 0       | 0       | ?        | #DIV/0!      | ?         |
| 0       | 0       | ?        | #DIV/0!      | ?         |
| 300     | 230     | 0.937463 | -0.089267338 | 0.82144   |
| 2       | 1       | 1        | 0            | 0.710482  |
| 2.5     | 2.5     | 0.821423 | 0.485426827  | 0.821423  |
| 45.5    | 27.5    | 0.771506 | -0.485426827 | 0.910458  |
| 13      | 8.5     | 0.390576 | -1.700439718 | 0.651125  |
| 0.5     | 0       | 1        | 0            | 0.450185  |
| 60.6988 | 47.0734 | 0.545407 | -1.053463207 | 0.725713  |
| 2       | 19.5    | 1        | 0            | 0.168023  |
| 585.738 | 544.219 | 0.795445 | -0.471314396 | 0.846288  |
| 0       | 0       | ?        | #DIV/0!      | ?         |
| 6.5     | 0       | 0.269128 | -2.115477217 | 0.71213   |
| 10.5    | 10      | 0.90539  | 0.192645078  | 0.874214  |
| 0.5     | 0       | 0.308068 | #NUM!        | 1         |

|         |         |          |              |          |
|---------|---------|----------|--------------|----------|
| 0       | 0       | ?        | #DIV/0!      | ?        |
| 7       | 4.5     | 0.730374 | -0.637429921 | 1        |
| 402.366 | 499.993 | 0.999061 | -0.002436631 | 0.865013 |
| 6.5     | 2.5     | 0.82986  | -0.378511623 | 0.722288 |
| 1       | 3       | 0.764931 | 1            | 0.764931 |
| 14.5    | 9.5     | 0.685776 | -0.857980995 | 0.924506 |
| 0.5     | 0.5     | 0.450185 | #NUM!        | 0.450185 |
| 0       | 0       | ?        | #DIV/0!      | ?        |
| 68.5    | 99.4999 | 0.974701 | 0.051717069  | 0.720962 |
| 9       | 27.5    | 0.958019 | 0.152003093  | 0.390946 |
| 6.5     | 7       | 0.759287 | -0.700439718 | 0.714152 |
| 326     | 320     | 0.819482 | -0.371448231 | 0.83377  |
| 10.5    | 15      | 0.953331 | -0.144389909 | 0.749819 |
| 95.0348 | 114.165 | 0.976106 | 0.06431091   | 0.918585 |
| 41      | 20.5    | 0.887832 | -0.228268988 | 0.735503 |
| 4       | 6       | 0.84925  | -0.415037499 | 0.578553 |
| 390.295 | 281.642 | 0.879743 | -0.219202857 | 0.882723 |
| 44.5    | 58      | 0.732354 | -0.983880335 | 0.587462 |
| 0.5     | 1.5     | 0.379187 | 2.807354922  | 0.541977 |
| 7.5     | 10      | 0.888898 | -0.321928095 | 0.712563 |
| 61.7291 | 39.2794 | 0.648364 | -0.736523942 | 0.966469 |
| 0       | 2.5     | 0.825659 | #DIV/0!      | 0.407544 |
| 0.5     | 2.5     | 0.825659 | #NUM!        | 0.31594  |
| 7.10652 | 8       | 0.70666  | -0.829143258 | 0.630907 |
| 166     | 172.5   | 0.863923 | -0.28757659  | 0.835043 |
| 350.796 | 282.206 | 0.75618  | -0.485176801 | 0.92135  |
| 5       | 1       | 0.550362 | -1.321928095 | 0.837425 |
| 0       | 0       | ?        | #DIV/0!      | ?        |
| 2531.5  | 2342.5  | 0.536512 | -0.930737338 | 0.598641 |
| 434     | 342     | 0.727014 | -0.444138619 | 0.943713 |
| 17      | 36.5    | 0.780697 | 0.745427173  | 0.845853 |
| 605.612 | 695.777 | 0.685126 | -0.732914384 | 0.582529 |
| 7.09342 | 0.75378 | 0.797459 | -0.432623149 | 0.541627 |
| 0       | 0       | ?        | #DIV/0!      | ?        |
| 79.5    | 70.5    | 0.76276  | -0.347098671 | 0.886281 |
| 0       | 0.5     | 0.450185 | #DIV/0!      | 1        |
| 7226.23 | 7393.88 | 0.647189 | -0.992224775 | 0.632552 |
| 4.5     | 4       | 0.629898 | 0.830074999  | 0.584276 |
| 3       | 3.5     | 0.729943 | -1           | 0.648139 |
| 1249    | 1122.5  | 0.932855 | -0.143174548 | 0.995155 |
| 0       | 0       | ?        | #DIV/0!      | ?        |
| 10.5    | 21      | 0.90942  | -0.304854582 | 0.495972 |
| 0       | 0       | ?        | #DIV/0!      | ?        |
| 0       | 0       | ?        | #DIV/0!      | ?        |
| 0       | 0       | ?        | #DIV/0!      | ?        |
| 0       | 0       | ?        | #DIV/0!      | ?        |
| 3       | 7.5     | 0.494791 | 1.662965013  | 0.826872 |
| 4.5     | 7.5     | 0.843013 | 0.415037499  | 0.843013 |
| 0       | 0.5     | 0.450185 | #DIV/0!      | 1        |
| 2.5     | 2       | 0.834708 | 0.263034406  | 0.680109 |
| 0       | 0       | 0.308068 | #DIV/0!      | 0.308068 |
| 0       | 0       | 0.308068 | #DIV/0!      | 0.308068 |
| 0       | 0       | ?        | #DIV/0!      | ?        |
| 120.5   | 231     | 0.668001 | -1.763142217 | 0.355549 |
| 431.875 | 504.584 | 0.763876 | -0.513192283 | 0.642818 |
| 42.5    | 50      | 0.7977   | -0.502500341 | 0.684567 |

|         |         |          |              |           |
|---------|---------|----------|--------------|-----------|
| 3.20559 | 0.71295 | 0.62159  | -1.025402975 | 0.790821  |
| 51      | 30.5    | 0.547363 | -0.86507042  | 0.946032  |
| 0.5     | 0       | 1        | 0            | 0.450185  |
| 0       | 0.5     | 1        | #DIV/0!      | 0.308068  |
| 0.5     | 1.5     | 0.724378 | #NUM!        | 0.329316  |
| 3274.61 | 3199.64 | 0.856886 | -0.2540335   | 0.876905  |
| 0       | 0       | ?        | #DIV/0!      | ?         |
| 6.5     | 7.5     | 0.946067 | 0.106915204  | 0.946067  |
| 3       | 1       | 0.308068 | -1           | 0.710482  |
| 1       | 0       | 0.18169  | 1.584962501  | 0.0805096 |
| 0.5     | 0       | 0.308068 | #NUM!        | 1         |
| 36      | 45      | 0.988996 | 0.019899557  | 0.815559  |
| 109     | 96.5    | 0.935914 | -0.146132505 | 0.987773  |
| 4696.5  | 4787.5  | 0.733134 | -0.644701196 | 0.719699  |
| 45.5    | 65      | 1        | 0            | 0.777535  |
| 21      | 36      | 0.920878 | 0.251538767  | 0.786013  |
| 19.5    | 38.5    | 0.919542 | 0.269186633  | 0.708313  |
| 14332.8 | 10393.8 | 0.577508 | -0.705001395 | 0.868592  |
| 36918.1 | 27775   | 0.514246 | -0.78804621  | 0.781314  |
| 0       | 0       | ?        | #DIV/0!      | ?         |
| 0       | 0       | ?        | #DIV/0!      | ?         |
| 0.5     | 0       | 0.308068 | #NUM!        | 1         |
| 4.5     | 2       | 0.15041  | -3.169925001 | 0.523243  |
| 3.5     | 0.5     | 0.868208 | -0.222392421 | 0.433134  |
| 51.5    | 68.5    | 0.698449 | -0.496675968 | 0.429904  |
| 41.5    | 28      | 0.687998 | -0.82045058  | 0.918874  |
| 78      | 98.5    | 0.95719  | -0.09557766  | 0.785682  |
| 1.5     | 2       | 0.604181 | -1.584962501 | 0.450185  |
| 6.5     | 7       | 0.617256 | 0.823122238  | 0.651448  |
| 0.5     | 0       | 0.308068 | #NUM!        | 1         |
| 3       | 6.5     | 0.728419 | 0.874469118  | 0.888473  |
| 0       | 0       | ?        | #DIV/0!      | ?         |
| 3       | 1       | 0.710482 | -0.584962501 | 0.710482  |
| 0       | 0       | ?        | #DIV/0!      | ?         |
| 0       | 0       | ?        | #DIV/0!      | ?         |
| 0       | 0       | ?        | #DIV/0!      | ?         |
| 5       | 2.5     | 0.749249 | -0.514573173 | 0.830364  |
| 216.17  | 158.812 | 0.551549 | -0.839963926 | 0.807002  |
| 75.6327 | 75.5392 | 0.639777 | -0.792308127 | 0.640718  |
| 2       | 6       | 0.84925  | 0.584962501  | 0.578553  |
| 1.5     | 2       | 1        | 0            | 0.847091  |
| 0       | 0.5     | 1        | #DIV/0!      | 0.308068  |
| 0       | 1       | 1        | #DIV/0!      | 0.308068  |
| 0       | 0       | ?        | #DIV/0!      | ?         |
| 201.5   | 180     | 0.879686 | -0.228371274 | 0.967191  |
| 0.5     | 0.5     | 1        | 0            | 1         |
| 0       | 0       | ?        | #DIV/0!      | ?         |
| 1675.5  | 1700.5  | 0.552742 | -1.265361125 | 0.543308  |
| 9.5     | 15.5    | 0.873897 | 0.395928676  | 0.873897  |
| 13.5    | 12.5    | 0.813955 | -0.362570079 | 0.874974  |
| 4.5     | 6       | 0.938976 | 0.152003093  | 0.87851   |
| 443     | 388.5   | 0.393095 | -0.711678105 | 0.544944  |
| 0       | 2       | 1        | #DIV/0!      | 0.308068  |
| 240     | 289.5   | 0.904491 | 0.230100516  | 0.981522  |
| 632.5   | 600.5   | 0.819341 | -0.334815779 | 0.862676  |
| 18.5    | 12      | 0.619717 | 0.69743723   | 0.451516  |

|          |          |             |              |           |
|----------|----------|-------------|--------------|-----------|
| 340.5    | 382      | 0.838219    | -0.397490518 | 0.759619  |
| 394      | 194      | 0.955324    | -0.040851238 | 0.372776  |
| 77.5     | 51.5     | 0.760844    | -0.455945443 | 0.941746  |
| 1        | 0        | 0.756486    | 0.584962501  | 0.3832    |
| 33       | 26.5     | 0.837103    | 0.313157885  | 0.711895  |
| 1.5      | 0.5      | 0.706667    | 0.736965594  | 0.468351  |
| 0.5      | 0.5      | 0.450185    | #NUM!        | 0.450185  |
| 185      | 181      | 0.989365    | 0.023207391  | 0.975191  |
| 23       | 34       | 0.902763    | 0.231325546  | 0.831187  |
| 22.5     | 12.5     | 0.676324    | -0.684498174 | 0.940317  |
| 1        | 1.5      | 0.724378    | -1           | 0.495025  |
| 8.5      | 1.5      | 0.344065    | 0.436099115  | 0.0334494 |
| 521      | 452.5    | 0.873448    | -0.252000356 | 0.97712   |
| 39.5     | 35.5     | 0.77254     | -0.470890734 | 0.853376  |
| 119.5    | 32       | 0.825822    | 0.365919733  | 0.45847   |
| 1.5      | 2.5      | 0.770719    | 0.736965594  | 1         |
| 14       | 12.5     | 0.867064    | -0.283792966 | 0.946497  |
| 24       | 30.5     | 0.489836    | -0.830074999 | 0.293443  |
| 0.5      | 0        | 0.308068    | #NUM!        | 1         |
| 896.001  | 751.495  | 0.740017    | -0.417185426 | 0.904639  |
| 0        | 1.5      | 1           | #DIV/0!      | 0.308068  |
| 4.5      | 1        | 0.79813     | 0.415037499  | 0.420459  |
| 18       | 25       | 0.778247    | 0.584962501  | 0.949743  |
| 11785    | 10216.5  | 0.901587    | -0.216609579 | 0.99552   |
| 0        | 0.5      | 0.353387    | #DIV/0!      | 0.622002  |
| 1        | 0.5      | 0.353387    | #NUM!        | 0.622002  |
| 7        | 20       | 0.795875    | 0.836501268  | 0.725688  |
| 0.5      | 0        | 0.622002    | 1            | 0.353387  |
| 23.5     | 38.5     | 0.713969    | -1.232660757 | 0.457439  |
| 32.5     | 38       | 0.216901    | -1.7744403   | 0.148912  |
| 904      | 722      | 0.586428    | -1.248426319 | 0.718399  |
| 381.5    | 204.5    | 0.438164    | -0.6990223   | 0.864539  |
| 54.5     | 61       | 0.906225    | -0.229025514 | 0.831423  |
| 1        | 1        | 0.308068    | #NUM!        | 0.308068  |
| 0        | 0        | ?           | #DIV/0!      | ?         |
| 0        | 0        | ?           | #DIV/0!      | ?         |
| 7        | 6        | 0.448923    | -1.485426827 | 0.547675  |
| 6.5      | 3.5      | 0.82986     | -0.378511623 | 0.82986   |
| 10       | 15       | 0.896156    | -0.321928095 | 0.653559  |
| 359.5    | 378.5    | 0.802966    | -0.405039573 | 0.762244  |
| 0        | 0        | ?           | #DIV/0!      | ?         |
| 62       | 97.5     | 0.852871    | 0.438121112  | 0.90921   |
| 0        | 0        | 0.308068    | #DIV/0!      | 0.308068  |
| 0.5      | 0.5      | 0.450185    | #NUM!        | 0.450185  |
| 13.5     | 20.5     | 0.70767     | -0.584962501 | 0.369191  |
| 0        | 0.5      | 1           | #DIV/0!      | 0.308068  |
| 0        | 0        | ?           | #DIV/0!      | ?         |
| 445.5    | 484      | 0.563153    | -0.619372532 | 0.477996  |
| 3.36393  | 0.73279  | 0.338283    | -1.001961277 | 0.568268  |
| 9        | 9.5      | 0.577983    | -1           | 0.539144  |
| 3.53289  | 1.92717  | 0.87267     | -0.225106491 | 0.733119  |
| 5.11E-15 | 5.16E-20 | ?           | #NUM!        | ?         |
| 4.82E-18 | 3.57E-35 | ?           | #NUM!        | ?         |
| 0        | 0        | ?           | #DIV/0!      | ?         |
| 0.00472  | 0        | 0.308068    | #NUM!        | 1         |
| 1        | 0.05119  | 0.000159992 | #NUM!        | 0.308068  |

|          |          |          |              |          |
|----------|----------|----------|--------------|----------|
| 0        | 0        | ?        | #DIV/0!      | ?        |
| 3.27E-19 | 0.01086  | 1        | -44.03449301 | 0.308068 |
| 2.93697  | 6.79E-16 | 0.333252 | -4.0705762   | 0.946533 |
| 158.578  | 199.765  | 0.39864  | -0.965644556 | 0.22957  |
| 2.62755  | 3.55418  | 0.645386 | 1.090409599  | 0.749101 |
| 1.87362  | 0.94823  | 0.35667  | -7.503528816 | 0.622432 |
| 109.446  | 138.747  | 0.907968 | -0.244256033 | 0.755182 |
| 0        | 0        | ?        | #DIV/0!      | ?        |
| 40.5     | 33.5     | 0.559483 | -1.017921908 | 0.695546 |
| 32.9171  | 33.0875  | 0.735339 | -0.550323564 | 0.731276 |
| 14.4565  | 19.2241  | 0.868775 | 0.326151245  | 0.960362 |
| 0.13827  | 3.6511   | 0.965945 | -16.36518774 | 0.308355 |
| 0        | 0.01465  | 1        | #DIV/0!      | 0.308068 |
| 0        | 0        | ?        | #DIV/0!      | ?        |
| 2.98E-12 | 1.28E-24 | ?        | #NUM!        | ?        |
| 55.9093  | 77.438   | 0.968494 | -0.082339975 | 0.755939 |
| 1.81E-09 | 4.00E-10 | 0.308068 | 28.84698243  | 0.308068 |
| 4.45E-12 | 1.58E-06 | 0.960779 | 13.92162302  | 0.326429 |
| 0        | 0        | ?        | #DIV/0!      | ?        |
| 0.93521  | 2.79391  | 0.817454 | 0.522703056  | 0.437043 |
| 0.5      | 0        | 0.308068 | #NUM!        | 1        |
| 5.78E-05 | 1.18E-06 | 0.325184 | 4.613891755  | 0.308722 |
| 3.50E-09 | 1.40E-15 | 0.308068 | 25.49948604  | 0.308068 |
| 1.21E-10 | 0.30661  | 0.71401  | 29.7177415   | 0.505806 |
| 27.9215  | 25.3953  | 0.931723 | -0.121225712 | 0.991614 |
| 9        | 10.8748  | 0.607219 | -1.169925001 | 0.488814 |
| 1.0311   | 1.13167  | 0.883427 | -0.355645788 | 0.832407 |
| 2.10604  | 2.26605  | 0.404855 | -2.742602952 | 0.369496 |
| 57.4734  | 50.9253  | 0.867245 | 0.33752021   | 0.811299 |
| 3.44764  | 8.08755  | 0.602595 | -9.425126461 | 0.266518 |
| 7.24084  | 12.3038  | 0.771344 | -0.686232071 | 0.432003 |
| 549      | 518.5    | 0.466173 | -1.905905485 | 0.497647 |
| 43.5     | 50.5     | 0.664034 | -0.9510904   | 0.567676 |
| 1.42E-12 | 0.66378  | 1        | 11.07787503  | 0.308068 |
| 11.3361  | 20.8955  | 0.999416 | -0.001094899 | 0.439724 |
| 3.08E-15 | 1.42E-27 | ?        | #NUM!        | ?        |
| 112.5    | 90       | 0.715078 | 0.637429921  | 0.623195 |
| 5.78E-05 | 1.18E-06 | 0.325184 | 4.613891755  | 0.308722 |
| 1.05613  | 1.0277   | 0.444694 | #NUM!        | 0.455812 |
| 13.4022  | 7.97106  | 0.485566 | -2.11024614  | 0.732664 |
| 0        | 0        | ?        | #DIV/0!      | ?        |
| 0        | 0        | ?        | #DIV/0!      | ?        |
| 0        | 0        | ?        | #DIV/0!      | ?        |
| 6.45E-44 | 0.50131  | 0.999997 | 124.1244655  | 0.307786 |
| 0        | 4.53E-06 | 1        | #DIV/0!      | 0.308068 |
| 0        | 3.92E-37 | ?        | #DIV/0!      | ?        |
| 0.00054  | 0.0094   | 0.94842  | -53.27247389 | 0.308727 |
| 179.5    | 139.5    | 0.701538 | -0.504846459 | 0.924117 |
| 3.00E-07 | 1.14547  | 1        | -0.290962289 | 0.308068 |
| 242.495  | 175.361  | 0.442315 | -1.193400847 | 0.684187 |
| 13.4512  | 15.3722  | 0.966107 | 0.097562281  | 0.964711 |
| 271.5    | 247      | 0.544133 | -1.002659346 | 0.615056 |
| 6.48995  | 4.98114  | 0.604357 | -1.397070447 | 0.742172 |
| 8.30605  | 11.2012  | 0.895495 | 0.143891492  | 0.761869 |
| 0.28775  | 0        | 0.308068 | -135.7155645 | 1        |
| 35       | 24       | 0.822726 | -0.175086707 | 0.697783 |



|          |          |          |              |            |
|----------|----------|----------|--------------|------------|
| 3.47951  | 6.85305  | 0.698079 | -0.757984711 | 0.245365   |
| 3.72E-07 | 1.53E-19 | 0.308068 | #NUM!        | 1          |
| 12.5239  | 26.563   | 0.946639 | 0.202516588  | 0.67176    |
| 0        | 0        | ?        | #DIV/0!      | ?          |
| 0        | 0        | ?        | #DIV/0!      | ?          |
| 1.94804  | 0.03607  | 0.308137 | -30.38645174 | 0.983333   |
| 1560.5   | 1446.5   | 0.634592 | -0.56271559  | 0.710708   |
| 0        | 0        | 0.308068 | #DIV/0!      | 0.308068   |
| 3.08844  | 4.44E-19 | 0.457728 | -1.840012663 | 0.763454   |
| 258      | 248.5    | 0.603071 | -0.923764414 | 0.630308   |
| 0.79733  | 2.69723  | 0.72902  | 1.207495731  | 0.775591   |
| 23.4141  | 19.7582  | 0.608085 | -1.356892127 | 0.699741   |
| 0        | 0        | 0.308068 | #DIV/0!      | 0.308068   |
| 1.40216  | 2.26628  | 0.565203 | -51.75057367 | 0.374188   |
| 139      | 127      | 0.968968 | 0.075815782  | 0.9195     |
| 1.49E-08 | 0        | 0.308068 | #NUM!        | 1          |
| 73.6652  | 86.6161  | 0.991243 | -0.024409808 | 0.89989    |
| 0.35828  | 8.59E-09 | 0.308068 | -25.31454861 | 1          |
| 2.03E-35 | 1.88E-34 | ?        | -9.419214455 | ?          |
| 4.34E-36 | 0.01713  | 1        | 37.70418909  | 0.308068   |
| 0        | 0        | ?        | #DIV/0!      | ?          |
| 0        | 0        | ?        | #DIV/0!      | ?          |
| 0        | 0        | ?        | #DIV/0!      | ?          |
| 0        | 0        | ?        | #DIV/0!      | ?          |
| 0        | 0        | ?        | #DIV/0!      | ?          |
| 3.87389  | 0.04257  | 0.312658 | -6.472417908 | 0.999754   |
| 0        | 0        | ?        | #DIV/0!      | ?          |
| 1.51882  | 5.31E-16 | 0.308068 | -27.72530169 | 1          |
| 218.05   | 262.896  | 0.868085 | 0.321973085  | 0.976427   |
| 143.091  | 148.899  | 0.864054 | 0.296222313  | 0.887985   |
| 1.39294  | 0.8438   | 0.426065 | -3.075620484 | 0.646633   |
| 8.15E-07 | 6.18E-15 | 0.308192 | 11.65711862  | 0.308068   |
| 0.00395  | 1.45E-31 | 0.308068 | #NUM!        | 1          |
| 16.5419  | 7.8972   | 0.815264 | -0.376272818 | 0.766274   |
| 1266.8   | 1274.57  | 0.984924 | 0.032498411  | 0.988985   |
| 66.032   | 51.9825  | 0.390166 | -1.183942    | 0.578465   |
| 2.13E-31 | 0.87401  | 1        | #NUM!        | 0.00342458 |
| 3.40066  | 1.69036  | 0.472144 | -0.824054888 | 0.906403   |
| 0        | 9.81E-37 | ?        | #DIV/0!      | ?          |
| 1.27E-19 | 4.36E-13 | ?        | #NUM!        | ?          |
| 1.27E-19 | 0.00919  | 1        | #NUM!        | 0.308068   |
| 1.56E-41 | 0        | ?        | #NUM!        | ?          |
| 194      | 158.5    | 0.834866 | 0.288830407  | 0.706177   |
| 186.821  | 284.75   | 0.959331 | 0.102211812  | 0.756327   |
| 0.56997  | 3.23952  | 0.845534 | -82.57637047 | 0.314182   |
| 88       | 103      | 0.860947 | 0.341468281  | 0.949353   |
| 1.18748  | 0.50088  | 0.90528  | -0.227433017 | 0.726976   |
| 2.56E-22 | 0.63759  | 1        | 49.51105075  | 0.308068   |
| 160.547  | 145.612  | 0.880928 | -0.261678139 | 0.947453   |
| 258.5    | 245      | 0.585941 | -0.55869325  | 0.645593   |
| 338.806  | 340.074  | 0.860854 | -0.322395505 | 0.858297   |
| 81354.6  | 86275.3  | 0.182976 | -1.336334594 | 0.153959   |
| 54.6192  | 58.3823  | 0.901183 | 0.213995646  | 0.943609   |
| 5.51E-07 | 0.00788  | 0.308089 | 20.4123794   | 0.312217   |
| 5.87E-14 | 5.36E-28 | ?        | -36.26399076 | ?          |
| 2.53E-41 | 0        | ?        | #NUM!        | ?          |

|          |          |           |              |             |
|----------|----------|-----------|--------------|-------------|
| 2.34123  | 1.34341  | 0.536181  | -0.947094256 | 0.94143     |
| 291.5    | 245.5    | 0.531118  | -1.063230761 | 0.65629     |
| 0        | 0        | 0.308068  | #DIV/0!      | 0.308068    |
| 7.32113  | 0.63846  | 0.31109   | -8.037856739 | 0.925363    |
| 3.68E-08 | 1.25E-22 | 0.308068  | #NUM!        | 1           |
| 0        | 0        | ?         | #DIV/0!      | ?           |
| 51.7917  | 49.3279  | 0.585303  | -0.963275666 | 0.620682    |
| 174.763  | 153.566  | 0.870504  | 0.26549784   | 0.794969    |
| 56.1824  | 49.6192  | 0.850397  | -0.234264067 | 0.966707    |
| 2.5      | 1.5      | 0.892901  | 0.263034406  | 0.690256    |
| 0.49048  | 1.63E-06 | 0.311345  | -6.945561005 | 0.992699    |
| 1.29E-06 | 1.18E-11 | 0.307918  | -24.33565763 | 0.999992    |
| 1.45267  | 0.74858  | 0.556214  | -1.463086755 | 0.88441     |
| 2.09E-09 | 7.40E-08 | 0.989624  | 0.403434303  | 0.23293     |
| 415.742  | 47.1714  | 0.324686  | -1.091681789 | 0.488383    |
| 3.73E-12 | 2.05E-37 | ?         | -35.00651016 | ?           |
| 1.31E-16 | 1.34E-26 | ?         | -9.710718483 | ?           |
| 8.66E-26 | 0        | 0.308068  | 49.77464306  | 0.308068    |
| 2.03416  | 1.54092  | 0.400935  | #NUM!        | 0.513193    |
| 2.11036  | 2.08E-11 | 0.0818245 | -93.90614202 | 1           |
| 501.5    | 443.5    | 0.236553  | -0.510674272 | 0.433061    |
| 0        | 0.05189  | 1         | #DIV/0!      | 0.308068    |
| 0.21225  | 0        | 0.308068  | #NUM!        | 1           |
| 3.71151  | 6.56381  | 0.979412  | 0.055820711  | 0.640467    |
| 0        | 0        | ?         | #DIV/0!      | ?           |
| 11.7525  | 8.27114  | 0.950334  | -0.106179797 | 0.843753    |
| 0        | 0        | ?         | #DIV/0!      | ?           |
| 2.8607   | 3.5      | 0.864758  | 0.390391574  | 0.961752    |
| 1.69E-23 | 0        | ?         | #NUM!        | ?           |
| 5.35E-15 | 1.26E-13 | 0.308068  | 47.40068887  | 0.308068    |
| 353      | 384.5    | 0.879599  | -0.31886613  | 0.826558    |
| 596.823  | 645.676  | 0.789772  | -0.363719441 | 0.717023    |
| 0        | 0        | ?         | #DIV/0!      | ?           |
| 0        | 0        | 0.308068  | #DIV/0!      | 0.308068    |
| 1.72E-14 | 0.00367  | 0.308073  | 45.29927326  | 0.310054    |
| 79.6009  | 90.3389  | 0.755915  | -0.658273672 | 0.673025    |
| 1.89022  | 4.37911  | 0.584917  | -12.28334942 | 0.252394    |
| 11.3465  | 9.04571  | 0.354391  | -14.78881815 | 0.447766    |
| 3.30E-28 | 1.85117  | 1         | 43.1842992   | 0.308068    |
| 6.53812  | 12.4973  | 0.656604  | -0.949579383 | 0.250338    |
| 0        | 0        | ?         | #DIV/0!      | ?           |
| 0        | 0        | ?         | #DIV/0!      | ?           |
| 1.97641  | 8.8104   | 0.679583  | 1.60480676   | 0.77264     |
| 204.766  | 197.862  | 0.977078  | -0.059153225 | 0.996314    |
| 632      | 669      | 0.170367  | -1.179659436 | 0.141478    |
| 53       | 47       | 0.859946  | -0.236067358 | 0.964718    |
| 58.1827  | 48.1892  | 0.585609  | -1.164033134 | 0.702739    |
| 1.23972  | 0.69092  | 0.363129  | -82.73733004 | 0.593012    |
| 0        | 0        | 0.308068  | #DIV/0!      | 0.308068    |
| 0        | 0        | ?         | #DIV/0!      | ?           |
| 7        | 5        | 0.329316  | -0.807354922 | 0.724378    |
| 4.93E-16 | 5.67E-18 | ?         | -30.29446138 | ?           |
| 2828.08  | 2789.2   | 0.811834  | -0.379470991 | 0.822719    |
| 47.6271  | 61.0298  | 0.795626  | -0.618081815 | 0.644316    |
| 3.33E-33 | 1.21E-16 | ?         | #NUM!        | ?           |
| 1.90248  | 6.93553  | 0.0180976 | -3.517861541 | 0.000352036 |

|          |          |           |              |           |
|----------|----------|-----------|--------------|-----------|
| 364.339  | 340.499  | 0.702156  | -0.574839336 | 0.758246  |
| 47.9308  | 59.6903  | 0.872293  | 0.326030243  | 0.995834  |
| 1        | 3.95E-26 | 0.308068  | #NUM!        | 1         |
| 6.79E-16 | 2.28E-33 | ?         | #NUM!        | ?         |
| 8.71E-17 | 7.50E-37 | 0.308068  | 51.40263822  | 0.308068  |
| 555.864  | 648.497  | 0.994615  | -0.011593437 | 0.883145  |
| 24.9676  | 18.296   | 0.638818  | -1.07517009  | 0.814734  |
| 2.93E-13 | 1.80E-06 | 0.308283  | 27.48620519  | 0.32168   |
| 3.45911  | 4.30498  | 0.598336  | 1.244946768  | 0.662533  |
| 0.03455  | 0        | 0.308068  | #NUM!        | 1         |
| 0.5      | 5        | 0.545049  | 2.584962501  | 0.624065  |
| 0.5      | 0        | 1         | 0            | 0.450185  |
| 2151     | 2060     | 0.767377  | -0.58546562  | 0.795791  |
| 6.92E-36 | 0        | ?         | #NUM!        | ?         |
| 0        | 7.15E-20 | ?         | #DIV/0!      | ?         |
| 6.79E-16 | 0        | ?         | #NUM!        | ?         |
| 539.219  | 485.046  | 0.564267  | -0.758350945 | 0.659444  |
| 287.193  | 315.152  | 0.564145  | -0.613983984 | 0.468499  |
| 5.78E-05 | 1.18E-06 | 0.325184  | 4.613891755  | 0.308722  |
| 5        | 2        | 1         | 0            | 0.622002  |
| 1.74E-28 | 4.17E-14 | 0.308068  | 84.97467856  | 0.308068  |
| 7.33851  | 11.9276  | 0.901296  | 0.307533986  | 0.839977  |
| 2.66E-31 | 2.90E-11 | 0.308068  | 100.9698023  | 0.308068  |
| 3120.5   | 2954     | 0.480647  | -0.967768603 | 0.525998  |
| 0        | 0        | ?         | #DIV/0!      | ?         |
| 0        | 0        | ?         | #DIV/0!      | ?         |
| 0.5      | 6.63E-25 | 0.308068  | #NUM!        | 1         |
| 6.53E-19 | 7.41E-21 | 0.0132141 | 54.12114533  | 0.0132141 |
| 192.5    | 180.5    | 0.68006   | -0.847247649 | 0.721855  |
| 1.53236  | 0.83498  | 0.629255  | 1.00803201   | 0.493802  |
| 207.5    | 232      | 0.813897  | -0.453793543 | 0.736476  |
| 2.38872  | 3.7644   | 0.542422  | -1.652762615 | 0.295575  |
| 0.00307  | 1.95835  | 0.497079  | 9.016087216  | 0.869585  |
| 0        | 0        | ?         | #DIV/0!      | ?         |
| 40.5     | 42       | 0.904463  | -0.210566986 | 0.87869   |
| 555.31   | 362.95   | 0.957456  | -0.077092777 | 0.764709  |
| 6.08078  | 8.33012  | 0.897559  | -0.346741826 | 0.727716  |
| 0        | 0        | ?         | #DIV/0!      | ?         |
| 6.77973  | 8.38904  | 0.595309  | -0.729148141 | 0.413625  |
| 3.39456  | 2.5488   | 0.934064  | 0.167781399  | 0.803696  |
| 3.40512  | 3.29511  | 0.443594  | -34.01527199 | 0.456973  |
| 0        | 0        | ?         | #DIV/0!      | ?         |
| 1.49E-06 | 1.83E-28 | 0.308068  | -62.41453227 | 1         |
| 0        | 0        | ?         | #DIV/0!      | ?         |
| 3.66E-18 | 7.12E-18 | ?         | #NUM!        | ?         |
| 5.05E-19 | 0        | 0.308068  | 56.53381212  | 0.308068  |
| 3.65E-13 | 3.92E-37 | ?         | -4.057632096 | ?         |
| 0.58982  | 1.77E-06 | 0.308061  | #NUM!        | 0.999997  |
| 7.96982  | 7.95404  | 0.723245  | -0.626382252 | 0.724703  |
| 6.89E-15 | 6.02E-11 | ?         | 5.609415003  | ?         |
| 3.43E-12 | 0        | ?         | #NUM!        | ?         |
| 0        | 0.5      | 1         | #DIV/0!      | 0.308068  |
| 15.0357  | 21.8308  | 0.476654  | -2.955960013 | 0.305714  |
| 1.51377  | 3        | 0.778615  | 0.482545748  | 0.681634  |
| 0        | 1.65E-16 | 0.308068  | #DIV/0!      | 0.308068  |
| 10.8894  | 13.8489  | 0.592216  | -0.679459968 | 0.378787  |

|          |          |          |              |          |
|----------|----------|----------|--------------|----------|
| 1.66943  | 5.78E-15 | 0.308069 | -18.50945566 | 0.999998 |
| 2.05E-33 | 1.76041  | 0.657353 | 108.2096299  | 0.572498 |
| 2.26E-08 | 4.03E-20 | 0.308071 | 16.97506973  | 0.308068 |
| 959.032  | 884.757  | 0.679074 | -0.669114741 | 0.741884 |
| 0        | 0        | ?        | #DIV/0!      | ?        |
| 0        | 0        | ?        | #DIV/0!      | ?        |
| 1.56E-41 | 0        | ?        | #NUM!        | ?        |
| 0        | 0        | ?        | #DIV/0!      | ?        |
| 0        | 0        | ?        | #DIV/0!      | ?        |
| 0        | 0        | 0.308068 | #DIV/0!      | 0.308068 |
| 117.351  | 120.141  | 0.974143 | 0.061327292  | 0.988298 |
| 3.88E-07 | 0.5744   | 0.999999 | -48.00008514 | 0.308068 |
| 0        | 2.43E-30 | ?        | #DIV/0!      | ?        |
| 0        | 0        | ?        | #DIV/0!      | ?        |
| 9.14E-21 | 0        | ?        | -14.39341512 | ?        |
| 9.57E-43 | 0        | ?        | #NUM!        | ?        |
| 0.5      | 0        | 0.308068 | #NUM!        | 1        |
| 1        | 0        | 0        | #NUM!        | ?        |
| 16       | 7.5      | 0.606308 | -0.830074999 | 0.909918 |
| 807.5    | 588.5    | 0.251917 | -0.646091194 | 0.748103 |
| 0.66867  | 2.67E-12 | 0.308068 | -43.69304611 | 1        |
| 247.953  | 209.887  | 0.943825 | -0.095413399 | 0.921513 |
| 15.4891  | 20.5404  | 0.696243 | -0.822052927 | 0.506276 |
| 1.45E-09 | 1.47E-07 | 0.308068 | 29.3413703   | 0.308068 |
| 0.65648  | 4.01559  | 0.568    | 2.388605898  | 0.9027   |
| 795      | 873.5    | 0.745017 | -0.552662009 | 0.672193 |
| 94.4522  | 78.0736  | 0.754958 | -0.540599208 | 0.888689 |
| 0        | 0        | ?        | #DIV/0!      | ?        |
| 9.92E-19 | 1.05E-11 | 0.308068 | 33.11056422  | 0.308526 |
| 1.82E-33 | 6.40E-30 | ?        | #NUM!        | ?        |
| 3.69151  | 0.07679  | 0.341313 | -3.044909305 | 0.905634 |
| 1.87895  | 10.404   | 0.880848 | 0.624110018  | 0.315027 |
| 17       | 13       | 0.767879 | -0.387023123 | 1        |
| 0.39071  | 4.39538  | 0.490465 | 3.018792753  | 0.751623 |
| 7.13E-20 | 5.37E-19 | 0.308068 | 53.6194256   | 0.308068 |
| 0.80005  | 5.99E-24 | 0.308068 | -41.2187426  | 1        |
| 330.217  | 290.875  | 0.652862 | -0.884954699 | 0.737033 |
| 1575.5   | 1424     | 0.581673 | -0.841874684 | 0.662944 |
| 2.34807  | 0.79256  | 0.329831 | -66.59184423 | 0.721457 |
| 0        | 3.40E-09 | 1        | #DIV/0!      | 0.308068 |
| 2        | 4.43E-18 | 0.308128 | -12.70558034 | 0.999865 |
| 7.38E-31 | 5.77E-36 | ?        | 48.60998872  | ?        |
| 0        | 0        | ?        | #DIV/0!      | ?        |
| 0        | 1.54E-17 | 0.308068 | #DIV/0!      | 0.308068 |
| 4.14214  | 1.02E-09 | 0.34481  | -3.582191326 | 0.925262 |
| 3.0563   | 6.5      | 0.971137 | 0.115014544  | 0.655201 |
| 45       | 41.5     | 0.986111 | 0.03170886   | 0.937595 |
| 0        | 3.18E-34 | ?        | #DIV/0!      | ?        |
| 0.37747  | 1.66207  | 0.803739 | -98.58404485 | 0.318045 |
| 8.43E-11 | 1.98E-07 | 0.308068 | 33.7659676   | 0.308068 |
| 13.5837  | 22.3304  | 0.92921  | 0.225261729  | 0.803832 |
| 2.35079  | 0.9212   | 0.336676 | -13.73682317 | 0.68511  |
| 0        | 0        | 0.308068 | #DIV/0!      | 0.308068 |
| 749.5    | 681.5    | 0.837726 | -0.386134992 | 0.899742 |
| 55.9082  | 35.2716  | 0.696908 | -0.507249981 | 0.922883 |
| 169      | 164      | 0.904896 | -0.230954435 | 0.923815 |

|          |          |          |              |           |
|----------|----------|----------|--------------|-----------|
| 39.5     | 36.5     | 0.959    | -0.094327383 | 0.991794  |
| 5.78E-05 | 1.18E-06 | 0.325184 | 4.613891755  | 0.308722  |
| 0.67924  | 2.47904  | 0.701428 | #NUM!        | 0.221139  |
| 2.04962  | 5.61102  | 0.960603 | -0.035356459 | 0.0298682 |
| 1.89E-43 | 0        | ?        | 26.72759638  | ?         |
| 2.02E-18 | 7.39E-19 | ?        | #NUM!        | ?         |
| 0        | 9.52E-13 | 0.034897 | #DIV/0!      | 0.034897  |
| 1.18442  | 1.07428  | 0.786317 | -0.646879384 | 0.83995   |
| 0        | 0.01465  | 1        | #DIV/0!      | 0.308068  |
| 2.07E-34 | 0.00271  | 1        | -11.61233974 | 0.308068  |
| 0        | 0        | ?        | #DIV/0!      | ?         |
| 2.57E-24 | 1.18E-21 | ?        | -10.00322757 | ?         |
| 2.24E-13 | 5.51E-23 | 0.308068 | 22.67021168  | 0.308068  |
| 203.738  | 164.06   | 0.289583 | -0.889145989 | 0.512961  |
| 502      | 530.5    | 0.946653 | -0.118233999 | 0.908373  |
| 18.8796  | 42.7542  | 0.775878 | -1.458563799 | 0.420778  |
| 145.008  | 92.685   | 0.854154 | -0.193327461 | 0.732126  |
| 0.38574  | 1.61054  | 0.931438 | 0.425715991  | 0.496856  |
| 19.2645  | 17.0451  | 0.887102 | -0.240851522 | 0.971557  |
| 1.14E-41 | 0        | ?        | #NUM!        | ?         |
| 0        | 8.83E-18 | ?        | #DIV/0!      | ?         |
| 1.61E-18 | 0        | ?        | #NUM!        | ?         |
| 0        | 4.56E-26 | 0.308068 | #DIV/0!      | 0.308068  |
| 2.02E-15 | 0        | ?        | -23.05151314 | ?         |
| 0.99796  | 0        | 0.308068 | #NUM!        | 1         |
| 1746.64  | 1565.63  | 0.878866 | -0.259632067 | 0.954849  |
| 4.69121  | 18.4752  | 0.786744 | 1.009887011  | 0.613755  |
| 16.4973  | 5.19478  | 0.244381 | -1.175175006 | 0.761963  |
| 3.62E-14 | 3.30E-06 | 1        | #NUM!        | 0.308068  |
| 0.50594  | 0        | 0.308068 | #NUM!        | 1         |
| 0        | 0.01254  | 1        | #DIV/0!      | 0.308068  |
| 0        | 0        | 0.308068 | #DIV/0!      | 0.308068  |
| 0        | 0        | ?        | #DIV/0!      | ?         |
| 0        | 7.66E-06 | 1        | #DIV/0!      | 0.308068  |
| 0.03771  | 3.98101  | 0.657785 | 4.983888471  | 0.322351  |
| 318      | 251      | 0.976573 | -0.046096415 | 0.867403  |
| 164.5    | 145      | 0.944869 | 0.109731441  | 0.86307   |
| 90.5     | 74.5     | 0.990767 | -0.01603011  | 0.862575  |
| 52.8975  | 71.3532  | 0.99697  | -0.008202569 | 0.813176  |
| 0        | 0        | 0.308068 | #DIV/0!      | 0.308068  |
| 5.31249  | 8.28764  | 0.172125 | -1.327585041 | 0.0409916 |
| 0        | 2        | 0.622002 | #DIV/0!      | 0.622002  |
| 51       | 44       | 0.898872 | -0.212993723 | 1         |
| 154.196  | 90.7612  | 0.956284 | -0.075086314 | 0.700617  |
| 39.8343  | 23.6372  | 0.655967 | -0.765586538 | 0.995447  |
| 1705.87  | 1519.09  | 0.545731 | -0.52140222  | 0.693612  |
| 15.0388  | 24.0482  | 0.753191 | -0.643935935 | 0.426413  |
| 5.71E-42 | 0.0117   | 0.999999 | 110.4707057  | 0.308068  |
| 0.5      | 1.59E-09 | 0.308068 | -28.22946981 | 1         |
| 502.5    | 442      | 0.742043 | -0.467168232 | 0.85151   |
| 0        | 0        | ?        | #DIV/0!      | ?         |
| 6.5      | 8.082    | 0.95375  | -0.115477217 | 0.810133  |
| 1        | 0.5      | 0.353387 | #NUM!        | 0.622002  |
| 167.503  | 157.431  | 0.746738 | -0.427809453 | 0.803917  |
| 944.497  | 823.568  | 0.628304 | -0.491125772 | 0.784511  |
| 28.3362  | 14.1793  | 0.873667 | -0.132945319 | 0.47783   |

|          |          |           |              |           |
|----------|----------|-----------|--------------|-----------|
| 0        | 0        | ?         | #DIV/0!      | ?         |
| 0        | 0.00676  | 0.308271  | #DIV/0!      | 0.321312  |
| 2.24E-33 | 8.51E-25 | ?         | #NUM!        | ?         |
| 0.00745  | 0        | 0.308068  | -95.80458151 | 1         |
| 0        | 0        | ?         | #DIV/0!      | ?         |
| 0        | 6.66E-16 | 0.308068  | #DIV/0!      | 0.308068  |
| 0        | 0        | ?         | #DIV/0!      | ?         |
| 4.02E-32 | 0        | 0.308068  | 100.59811    | 0.308068  |
| 0        | 0        | ?         | #DIV/0!      | ?         |
| 0        | 1.56E-36 | ?         | #DIV/0!      | ?         |
| 5.92E-20 | 0        | ?         | -50.59835729 | ?         |
| 532.115  | 612.5    | 0.899909  | -0.231278277 | 0.800351  |
| 47.6124  | 50.467   | 0.778653  | -0.569281001 | 0.740062  |
| 0.5      | 0        | 0.622002  | 1            | 0.353387  |
| 1028     | 865.5    | 0.573514  | -1.174317305 | 0.682562  |
| 2.4272   | 6.20E-09 | 0.0707166 | -1.044828458 | 0.0812763 |
| 0.5      | 0        | 0.308068  | #NUM!        | 1         |
| 0        | 6.58E-33 | ?         | #DIV/0!      | ?         |
| 0        | 0.5      | 0.622002  | #DIV/0!      | 0.622002  |
| 0        | 2.82E-06 | 1         | #DIV/0!      | 0.308068  |
| 0.92983  | 0.01641  | 0.496058  | -1.573106129 | 0.735587  |
| 22.75    | 28.75    | 0.79101   | -0.649813645 | 0.651352  |
| 405      | 446.5    | 0.782775  | -0.491853096 | 0.710419  |
| 320.924  | 320.597  | 0.585473  | -0.792158604 | 0.586328  |
| 0        | 0        | ?         | #DIV/0!      | ?         |
| 2.42E-16 | 0.52954  | 1         | -55.08179866 | 0.308068  |
| 35       | 53       | 0.591953  | -1.485426827 | 0.360577  |
| 2.44E-16 | 1.65952  | 0.449045  | 52.60105268  | 0.996429  |
| 74.2685  | 65.7032  | 0.792969  | -0.469785512 | 0.877444  |
| 106.623  | 110.739  | 0.811243  | -0.527176923 | 0.788276  |
| 40.842   | 39.6205  | 0.857139  | -0.319977773 | 0.878335  |
| 18544    | 16201.5  | 0.257575  | -0.807500802 | 0.397962  |
| 3.35E-09 | 1.97735  | 1         | 6.835994584  | 0.308068  |
| 246      | 244      | 0.734172  | -0.430761852 | 0.742075  |
| 0        | 0        | ?         | #DIV/0!      | ?         |
| 0        | 0        | ?         | #DIV/0!      | ?         |
| 9.92049  | 5.58243  | 0.694391  | -0.857302107 | 0.992378  |
| 0.5      | 0.02746  | 0.875989  | 0.285295677  | 0.432824  |
| 0        | 1.01E-31 | ?         | #DIV/0!      | ?         |
| 1.03646  | 0.29346  | 0.999052  | 0.002155903  | 0.580709  |
| 0.50087  | 0        | 0.308068  | #NUM!        | 1         |
| 5.27E-18 | 0        | ?         | -68.07304946 | ?         |
| 0        | 1.54E-30 | 0.308068  | #DIV/0!      | 0.308068  |
| 0        | 2.91E-16 | ?         | #DIV/0!      | ?         |
| 2.27E-11 | 4.70E-10 | 0.96092   | -3.315138571 | 0.31049   |
| 5.65E-38 | 0        | ?         | #NUM!        | ?         |
| 4.55E-24 | 0.01465  | 1         | -24.21691754 | 0.308068  |
| 0        | 0        | ?         | #DIV/0!      | ?         |
| 3.10E-28 | 4.58E-28 | ?         | -28.83822258 | ?         |
| 7.40E-18 | 2.29E-16 | 0.308068  | 56.66216573  | 0.308068  |
| 0        | 0.00579  | 1         | #DIV/0!      | 0.308068  |
| 0        | 0        | ?         | #DIV/0!      | ?         |
| 0        | 3.15E-09 | 1         | #DIV/0!      | 0.308068  |
| 1.08E-30 | 1.14E-22 | ?         | #NUM!        | ?         |
| 1.95E-11 | 0.00266  | 1         | -3.315144743 | 0.308068  |
| 163.137  | 107.971  | 0.571897  | -0.739740685 | 0.927126  |

|          |          |           |              |          |
|----------|----------|-----------|--------------|----------|
| 118.004  | 122.031  | 0.428477  | -2.263478516 | 0.411094 |
| 85.4107  | 109.376  | 0.683658  | -0.64647534  | 0.482974 |
| 220.919  | 216.936  | 0.964223  | 0.083502662  | 0.953414 |
| 284.143  | 227.496  | 0.712798  | -0.463587703 | 0.918531 |
| 1.74E-19 | 2.22E-26 | ?         | -67.64722245 | ?        |
| 0.26944  | 0        | 0.308068  | #NUM!        | 1        |
| 5.31E-25 | 4.88E-16 | ?         | -21.78980966 | ?        |
| 1.17E-18 | 0        | ?         | #NUM!        | ?        |
| 1.09E-14 | 0.00233  | 1         | -36.26398898 | 0.308068 |
| 0        | 9.60E-23 | ?         | #DIV/0!      | ?        |
| 0.63335  | 1.06752  | 0.749753  | 0.807305784  | 0.977921 |
| 0        | 0        | ?         | #DIV/0!      | ?        |
| 0        | 0.22404  | 1         | #DIV/0!      | 0.308068 |
| 0.7353   | 0.54819  | 0.561747  | 1.304144799  | 0.500896 |
| 0        | 1.40E-34 | ?         | #DIV/0!      | ?        |
| 1.51E-05 | 0        | 0.308068  | #NUM!        | 1        |
| 0        | 3.40E-10 | 1         | #DIV/0!      | 0.308068 |
| 0        | 0        | ?         | #DIV/0!      | ?        |
| 0        | 0        | ?         | #DIV/0!      | ?        |
| 0        | 0        | ?         | #DIV/0!      | ?        |
| 2.83E-28 | 5.21E-31 | ?         | #NUM!        | ?        |
| 3.14624  | 2.47231  | 0.852082  | -0.335977341 | 0.995367 |
| 62.5454  | 47.3092  | 0.883881  | -0.19962733  | 0.897098 |
| 0        | 0.86697  | 0.366785  | #DIV/0!      | 0.684855 |
| 10.0976  | 8.96686  | 0.533132  | -2.12295416  | 0.59072  |
| 0.14172  | 3.40E-09 | 0.308068  | -25.31454927 | 1        |
| 0        | 3.40E-09 | 0.450185  | #DIV/0!      | 1        |
| 0        | 0        | 0.308068  | #DIV/0!      | 0.308068 |
| 822.713  | 727.658  | 0.861875  | -0.306473117 | 0.944895 |
| 0        | 0        | ?         | #DIV/0!      | ?        |
| 1.00411  | 0.5      | 0.0909106 | #NUM!        | 0.308082 |
| 438.231  | 473.689  | 0.806518  | -0.334192905 | 0.73463  |
| 0        | 0.07335  | 1         | #DIV/0!      | 0.308068 |
| 40587    | 40136.5  | 0.180107  | -0.955342005 | 0.187536 |
| 0.93379  | 2.52192  | 0.521058  | -21.53899316 | 0.145254 |
| 8.21E-05 | 1.74428  | 0.493016  | 14.09497892  | 0.878081 |
| 12.5     | 15.5     | 0.95902   | -0.058893689 | 0.722245 |
| 0        | 3.37E-37 | ?         | #DIV/0!      | ?        |
| 691.5    | 676      | 0.891083  | -0.277502365 | 0.904923 |
| 4.10E-10 | 1.67E-08 | 0.979245  | -3.940795751 | 0.307473 |
| 4        | 1        | 0.844837  | 0.321928095  | 0.456444 |
| 3.08E-16 | 0        | ?         | #NUM!        | ?        |
| 25       | 25.5     | 0.668091  | -0.434402824 | 0.645157 |
| 0.06251  | 5.71E-16 | 0.308068  | -36.26399349 | 1        |
| 252.589  | 198.428  | 0.77381   | -0.482540773 | 0.94328  |
| 3.60978  | 2.15907  | 0.196956  | -2.853004891 | 0.442805 |
| 5.36289  | 4.62859  | 0.756188  | -0.743244585 | 0.836826 |
| 4.71154  | 5.94047  | 0.971145  | 0.086372701  | 0.907167 |
| 16       | 10.5     | 0.834785  | -0.299560282 | 0.861845 |
| 0.00601  | 1.60E-20 | 0.308068  | -22.14205494 | 1        |
| 5.889    | 2.61334  | 0.128649  | -1.794135237 | 0.68009  |
| 158      | 173.5    | 0.946977  | -0.138873822 | 0.890711 |
| 170.334  | 161.606  | 0.979737  | -0.044318687 | 0.985941 |
| 0.1014   | 0.85264  | 0.159577  | 6.63396221   | 0.183676 |
| 0.49532  | 0        | 0.308068  | #NUM!        | 1        |
| 0        | 3.30E-06 | 0.308068  | #DIV/0!      | 0.30807  |

|          |          |          |              |           |
|----------|----------|----------|--------------|-----------|
| 0        | 0        | ?        | #DIV/0!      | ?         |
| 0        | 0.66133  | 1        | #DIV/0!      | 0.308068  |
| 0.23056  | 0        | 0.308068 | #NUM!        | 1         |
| 0.02565  | 1.14E-19 | 0.308068 | -95.7932993  | 1         |
| 5.11756  | 5.27348  | 0.238884 | -6.364612171 | 0.227888  |
| 6.01E-15 | 5.49E-29 | ?        | -36.26399082 | ?         |
| 2        | 3.71E-34 | 0.308068 | -72.20507431 | 1         |
| 0        | 0        | ?        | #DIV/0!      | ?         |
| 6.89E-20 | 0        | ?        | #NUM!        | ?         |
| 0        | 2.98E-32 | ?        | #DIV/0!      | ?         |
| 0        | 0        | 0.308068 | #DIV/0!      | 0.308068  |
| 0.7647   | 1.55189  | 0.821061 | 0.613678382  | 0.831242  |
| 0        | 0        | ?        | #DIV/0!      | ?         |
| 3.39E-16 | 4.00E-08 | 0.308068 | 50.39043693  | 0.308068  |
| 0        | 0.00919  | 1        | #DIV/0!      | 0.308068  |
| 1.91E-36 | 7.51E-31 | ?        | 70.03612049  | ?         |
| 0        | 0        | ?        | #DIV/0!      | ?         |
| 0.5      | 0.01073  | 0.30816  | -131.1296333 | 0.980681  |
| 2.93E-12 | 0        | ?        | #NUM!        | ?         |
| 3.99E-13 | 1.10E-34 | ?        | #NUM!        | ?         |
| 13.1636  | 18.7588  | 0.842891 | -0.417343808 | 0.60183   |
| 20.5     | 16       | 0.802412 | -0.313157885 | 0.974901  |
| 158.734  | 234.534  | 0.900558 | -0.272942378 | 0.643879  |
| 12.1624  | 11.1906  | 0.978705 | -0.057782556 | 0.977959  |
| 244.934  | 258.885  | 0.836968 | -0.400250755 | 0.799792  |
| 388.605  | 402.151  | 0.992043 | 0.017960178  | 0.985813  |
| 0        | 0        | ?        | #DIV/0!      | ?         |
| 41.9098  | 30.6265  | 0.907175 | 0.064239292  | 0.445507  |
| 0        | 0.5      | 0.450185 | #DIV/0!      | 1         |
| 721.5    | 682      | 0.619951 | -0.872803765 | 0.661118  |
| 4.18E-10 | 4.54E-08 | 0.991712 | #NUM!        | 0.30808   |
| 3.48E-05 | 2.14503  | 0.377387 | 15.80891688  | 0.94316   |
| 7.55E-17 | 0        | ?        | #NUM!        | ?         |
| 0        | 0        | ?        | #DIV/0!      | ?         |
| 985      | 952.5    | 0.680184 | -0.532468926 | 0.711883  |
| 1        | 1        | 0.308068 | #NUM!        | 0.308068  |
| 0        | 0        | ?        | #DIV/0!      | ?         |
| 0        | 0        | ?        | #DIV/0!      | ?         |
| 0        | 0        | 0.308068 | #DIV/0!      | 0.308068  |
| 665.7    | 663.612  | 0.998653 | 0.002784311  | 0.996463  |
| 9.5      | 18       | 0.79404  | -0.440572591 | 0.298368  |
| 171.5    | 191      | 0.874281 | -0.277406523 | 0.794855  |
| 1.41E-22 | 1.29388  | 1        | 24.96961413  | 0.308068  |
| 0        | 0        | ?        | #DIV/0!      | ?         |
| 0.0006   | 1.87E-07 | 0.308228 | 11.29318487  | 0.308068  |
| 1        | 1        | 0.622002 | -1           | 0.622002  |
| 0.5      | 2.5      | 0.19041  | 2.807354922  | 0.613399  |
| 0        | 0.5      | 0.450185 | #DIV/0!      | 1         |
| 2.84E-29 | 3.05E-31 | ?        | #NUM!        | ?         |
| 0.20063  | 1.1523   | 0.847065 | -94.21388429 | 0.314057  |
| 3.30502  | 6.40275  | 0.868386 | -0.518465909 | 0.512834  |
| 0.00091  | 0.00024  | 0.309232 | 8.429449639  | 0.308381  |
| 12.328   | 19.7031  | 0.889118 | 0.358661326  | 0.876009  |
| 5.34156  | 31.0884  | 0.985977 | -0.040567905 | 0.0445386 |
| 10.4737  | 7.85916  | 0.725806 | -0.81568111  | 0.881224  |
| 86       | 110      | 0.9132   | -0.236440196 | 0.758236  |



|          |          |          |              |           |
|----------|----------|----------|--------------|-----------|
| 84.5592  | 12.4634  | 0.383926 | 1.277477672  | 0.202366  |
| 7.53275  | 8.46388  | 0.15392  | -1.575705313 | 0.109819  |
| 0        | 0        | 0.308068 | #DIV/0!      | 0.308068  |
| 0.71783  | 1.75862  | 0.891645 | 0.443395193  | 0.684035  |
| 0        | 6.52E-05 | 1        | #DIV/0!      | 0.0704451 |
| 0.04881  | 0.00065  | 0.308103 | -17.60178507 | 0.987948  |
| 0        | 1        | 0.501228 | #DIV/0!      | 0.857194  |
| 0        | 0.00497  | 1        | #DIV/0!      | 0.308068  |
| 9.95584  | 17.506   | 0.657215 | -0.964720521 | 0.298611  |
| 527      | 433.5    | 0.632322 | -0.701809149 | 0.793257  |
| 58.8834  | 37.0672  | 0.811322 | 0.214512459  | 0.451795  |
| 119.094  | 89.2449  | 0.936589 | 0.152726113  | 0.797443  |
| 105      | 116.5    | 0.918898 | 0.18662129   | 0.983177  |
| 288.38   | 274.697  | 0.930056 | 0.165562679  | 0.902946  |
| 0        | 0        | ?        | #DIV/0!      | ?         |
| 0        | 0        | ?        | #DIV/0!      | ?         |
| 1.54E-32 | 0.88098  | 1        | 36.62482498  | 0.308068  |
| 2.23864  | 1.28E-11 | 0.347796 | -3.479280015 | 0.919807  |
| 0.00017  | 2.07E-06 | 0.308098 | #NUM!        | 0.988918  |
| 93.0658  | 104.444  | 0.967274 | 0.066627214  | 0.948106  |
| 5.38074  | 5.49636  | 0.996854 | -0.008805131 | 0.985744  |
| 416.503  | 379.307  | 0.792606 | -0.433047045 | 0.862635  |
| 7.82657  | 9.96021  | 0.142248 | -1.600069995 | 0.0687883 |
| 1.95689  | 0.0981   | 0.30857  | -105.7157072 | 0.954959  |
| 3.52138  | 4.6276   | 0.691402 | -1.005780082 | 0.528323  |
| 1.0349   | 2.36E-06 | 0.308068 | -23.159464   | 0.999998  |
| 1475     | 1545.5   | 0.829236 | -0.398504918 | 0.796483  |
| 132.245  | 110.538  | 0.770656 | -0.371267547 | 0.935254  |
| 42.6802  | 54.067   | 0.835119 | 0.319024926  | 0.986992  |
| 6.34E-17 | 0        | ?        | #NUM!        | ?         |
| 1774.5   | 1703.5   | 0.612702 | -0.727107669 | 0.647573  |
| 601      | 620.5    | 0.673038 | -0.506707328 | 0.640904  |
| 1.09E-19 | 0.00788  | 1        | -45.34866709 | 0.308068  |
| 9.47E-29 | 3.88E-26 | ?        | #NUM!        | ?         |
| 0.01428  | 0.92475  | 0.986099 | -22.82620652 | 0.308116  |
| 0        | 0        | ?        | #DIV/0!      | ?         |
| 0        | 7.27E-16 | ?        | #DIV/0!      | ?         |
| 1.5      | 2.5      | 0.397364 | 1.874469118  | 0.513713  |
| 2540     | 2186     | 0.154876 | -0.951412297 | 0.27104   |
| 48.7536  | 36.4354  | 0.893745 | 0.243187578  | 0.752823  |
| 0        | 3.84E-33 | ?        | #DIV/0!      | ?         |
| 0.7221   | 0.00962  | 0.940407 | -0.135499214 | 0.476055  |
| 6105.5   | 4697     | 0.521216 | -0.598971664 | 0.83107   |
| 7        | 5        | 0.663517 | 0.836501268  | 0.558818  |
| 7.53E-11 | 1.41702  | 0.242454 | 34.02806546  | 0.921004  |
| 0.00106  | 0.44026  | 0.997175 | #NUM!        | 0.208681  |
| 0        | 1.57E-10 | 1        | #DIV/0!      | 0.308068  |
| 0.01371  | 0        | 0.308068 | -95.79330964 | 1         |
| 280.037  | 375.829  | 0.729376 | -0.731294319 | 0.530777  |
| 193.434  | 256.419  | 0.935483 | -0.146160976 | 0.725879  |
| 0        | 0        | ?        | #DIV/0!      | ?         |
| 0        | 0        | ?        | #DIV/0!      | ?         |
| 7.7188   | 6.34706  | 0.349253 | -106.5061902 | 0.429966  |
| 0        | 0.00039  | 1        | #DIV/0!      | 0.308068  |
| 1        | 9.44E-16 | 0.308068 | #NUM!        | 1         |
| 1.09E-19 | 0        | ?        | #NUM!        | ?         |

|          |          |          |              |          |
|----------|----------|----------|--------------|----------|
| 0.00019  | 2.59E-25 | 0.308051 | #NUM!        | 1        |
| 187.061  | 163.003  | 0.774945 | -0.509938843 | 0.870309 |
| 3.43859  | 2.99746  | 0.590819 | -1.598184504 | 0.660861 |
| 3.34418  | 5.80E-12 | 0.308068 | -41.08675815 | 1        |
| 256      | 216.5    | 0.798806 | -0.480363747 | 0.907185 |
| 0.23263  | 0.82573  | 0.46227  | 2.486787872  | 0.732428 |
| 0        | 4.20E-26 | ?        | #DIV/0!      | ?        |
| 9.36E-09 | 2.09E-15 | 0.308068 | -27.73918889 | 1        |
| 0        | 1.94E-05 | 0.924927 | #DIV/0!      | 0.344992 |
| 0.5      | 2        | 0.663808 | 1.584962501  | 0.825659 |
| 4        | 8.5      | 1        | 0            | 0.213405 |
| 3.01959  | 5.20112  | 0.859455 | 0.466241239  | 0.874187 |
| 347.5    | 285      | 0.780574 | -0.443689687 | 0.928352 |
| 69.3482  | 61.7244  | 0.829339 | 0.388093257  | 0.770859 |
| 0        | 0        | 0.308068 | #DIV/0!      | 0.308068 |
| 7.31E-13 | 5.64E-26 | ?        | -6.067247472 | ?        |
| 1.43E-37 | 1.90E-12 | 0.308068 | 104.0917247  | 0.308068 |
| 1.54E-31 | 0.27151  | 1        | #NUM!        | 0.308068 |
| 1.92E-33 | 0        | ?        | 48.10820292  | ?        |
| 0        | 3.40E-09 | 0.450185 | #DIV/0!      | 1        |
| 59.6778  | 82.6488  | 0.835026 | 0.42213103   | 0.977908 |
| 5.18E-06 | 1.02699  | 0.534976 | 17.07245218  | 0.778916 |
| 0.5      | 0.69905  | 0.527566 | #NUM!        | 0.392594 |
| 6513     | 5633     | 0.98744  | -0.025250322 | 0.914995 |
| 4.50646  | 4.74622  | 0.897522 | -0.304173222 | 0.869201 |
| 0.63446  | 0.06569  | 0.314707 | -6.486635727 | 0.917502 |
| 1304.81  | 1298.55  | 0.680119 | -0.63207269  | 0.684085 |
| 0        | 2.15E-12 | 0.308068 | #DIV/0!      | 0.308526 |
| 0        | 0        | ?        | #DIV/0!      | ?        |
| 857.5    | 789.5    | 0.607654 | -0.589174752 | 0.692077 |
| 270.607  | 272.294  | 0.81639  | -0.413270358 | 0.811925 |
| 36.9084  | 52.1577  | 0.359934 | -1.244948625 | 0.161629 |
| 2.13E-31 | 2.28E-33 | ?        | #NUM!        | ?        |
| 0.45413  | 3.85E-42 | 0.308068 | #NUM!        | 1        |
| 0.0013   | 0.02464  | 0.593001 | 3.419998103  | 0.645192 |
| 0.39071  | 0.17224  | 0.586462 | 1.092815476  | 0.431166 |
| 18.5     | 14.5     | 0.719161 | -0.68589141  | 0.8763   |
| 0        | 0        | ?        | #DIV/0!      | ?        |
| 3.5      | 3.5      | 0.379187 | -2.807354922 | 0.379187 |
| 138      | 144      | 0.794288 | -0.436099115 | 0.761506 |
| 3.5      | 1        | 0.47668  | -1.807354922 | 1        |
| 2.5      | 5.5      | 0.844258 | -0.736965594 | 0.454899 |
| 749      | 664.25   | 0.691635 | -0.658557631 | 0.782308 |
| 1703.5   | 1527.5   | 0.545386 | -0.645497993 | 0.660823 |
| 122.592  | 143.049  | 0.424435 | -0.694680367 | 0.277078 |
| 51.5     | 57       | 0.975867 | -0.057143907 | 0.909784 |
| 0        | 0        | ?        | #DIV/0!      | ?        |
| 22       | 7        | 0.884589 | 0.2410081    | 0.507782 |
| 281.5    | 298      | 0.66542  | -0.922671991 | 0.628463 |
| 997      | 953.5    | 0.692977 | -0.702883661 | 0.725405 |
| 2        | 2.5      | 1        | 0            | 0.866773 |
| 316.097  | 314.245  | 0.724424 | -0.749573291 | 0.728163 |
| 141.944  | 119.255  | 0.1128   | -1.424514144 | 0.196263 |
| 33       | 22       | 0.965805 | 0.064130337  | 0.724026 |
| 345.5    | 284      | 0.862518 | 0.281703617  | 0.753478 |
| 1104.5   | 1061     | 0.678394 | -0.623348395 | 0.711857 |

|          |          |           |              |           |
|----------|----------|-----------|--------------|-----------|
| 5.5      | 3.5      | 0.0344509 | -3.459431619 | 0.113502  |
| 0        | 0        | ?         | #DIV/0!      | ?         |
| 1.53307  | 6.3743   | 0.910048  | -0.817187029 | 0.383094  |
| 2        | 3.5      | 0.610398  | -2           | 0.339254  |
| 99       | 93       | 0.954555  | 0.112110366  | 0.92061   |
| 118.004  | 122.031  | 0.428477  | -2.263478516 | 0.411094  |
| 118.004  | 122.031  | 0.428477  | -2.263478516 | 0.411094  |
| 118.004  | 122.031  | 0.428477  | -2.263478516 | 0.411094  |
| 1.86414  | 9.28365  | 0.324363  | 5.099152532  | 0.376585  |
| 118.004  | 122.031  | 0.428477  | -2.263478516 | 0.411094  |
| 118.004  | 122.031  | 0.428477  | -2.263478516 | 0.411094  |
| 43.1566  | 8.29221  | 0.142162  | -11.6466978  | 0.729387  |
| 118.004  | 122.031  | 0.428477  | -2.263478516 | 0.411094  |
| 118.004  | 122.031  | 0.428477  | -2.263478516 | 0.411094  |
| 118.004  | 122.031  | 0.428477  | -2.263478516 | 0.411094  |
| 12224.2  | 12803.1  | 0.528168  | -0.850231803 | 0.488706  |
| 118.004  | 122.031  | 0.428477  | -2.263478516 | 0.411094  |
| 8.41712  | 9.72692  | 0.800587  | 0.551850271  | 0.865953  |
| 14.0415  | 18.4816  | 0.946909  | -0.152397003 | 0.783501  |
| 68.1713  | 52.1893  | 0.873629  | -0.289101054 | 0.962998  |
| 11.616   | 19.5934  | 0.720534  | 0.853657539  | 0.956957  |
| 27.5798  | 47.2369  | 0.705532  | -1.473837905 | 0.444211  |
| 9.35E-22 | 2.21288  | 1         | -7.345564602 | 0.308068  |
| 640.495  | 599.099  | 0.777876  | -0.45221645  | 0.829754  |
| 57.4761  | 45.5832  | 0.606071  | -0.919056958 | 0.76858   |
| 118.004  | 122.031  | 0.428477  | -2.263478516 | 0.411094  |
| 118.004  | 122.031  | 0.428477  | -2.263478516 | 0.411094  |
| 118.004  | 122.031  | 0.428477  | -2.263478516 | 0.411094  |
| 2.75E-38 | 6.91E-36 | ?         | -3.833486447 | ?         |
| 3696.96  | 3877.38  | 0.765239  | -0.463998774 | 0.725991  |
| 3.28E-23 | 2.45158  | 0.564168  | 75.14139173  | 0.644245  |
| 52.5     | 52.5     | 0.555353  | -1.544320516 | 0.555353  |
| 497      | 564      | 0.633156  | -1.159440516 | 0.557126  |
| 511.5    | 613      | 0.628941  | -1.322633397 | 0.526943  |
| 38.7027  | 13.6845  | 0.337491  | 0.451986656  | 0.0516794 |
| 1.94685  | 6.16E-09 | 0.308068  | -44.89247904 | 1         |
| 87.1526  | 50.0908  | 0.508585  | -1.082374331 | 0.89366   |
| 63.5901  | 61.7699  | 0.801916  | -0.454770653 | 0.822308  |
| 0        | 0        | ?         | #DIV/0!      | ?         |
| 236.5    | 198      | 0.603757  | -0.771954207 | 0.748813  |
| 0        | 0        | ?         | #DIV/0!      | ?         |
| 0.141    | 0        | 0.308068  | #NUM!        | 1         |
| 0.00245  | 0        | 0.308068  | #NUM!        | 1         |
| 0        | 0        | ?         | #DIV/0!      | ?         |
| 93.5     | 80       | 0.961346  | -0.071161029 | 0.922834  |
| 443      | 521      | 0.900125  | -0.257833156 | 0.795439  |
| 102      | 110      | 0.975857  | -0.057715498 | 0.927711  |
| 25       | 26       | 0.648697  | -0.943416472 | 0.622788  |
| 4.5      | 2        | 0.377943  | -2.169925001 | 0.787312  |
| 5.87317  | 5.77647  | 0.972859  | 0.074351929  | 0.964417  |
| 664      | 602      | 0.927519  | -0.141419755 | 1         |
| 48.5     | 55.5     | 0.884853  | 0.282730207  | 0.96143   |
| 0.5      | 0        | 0.308068  | #NUM!        | 1         |
| 0.23465  | 1.26E-18 | 0.388958  | 2.573784815  | 0.313647  |
| 23.5     | 17.5     | 0.491563  | -1.46712601  | 0.671151  |
| 20.5218  | 9.33829  | 0.849738  | -0.288936514 | 0.707204  |

|          |          |           |              |          |
|----------|----------|-----------|--------------|----------|
| 0        | 0        | ?         | #DIV/0!      | ?        |
| 86       | 91.5     | 0.551218  | -1.140862536 | 0.508967 |
| 13       | 8.5      | 0.971338  | -0.056583528 | 0.775447 |
| 0        | 0.5      | 1         | #DIV/0!      | 0.308068 |
| 1        | 0        | 0         | #NUM!        | ?        |
| 864.5    | 928.501  | 0.86227   | -0.359121653 | 0.817118 |
| 0        | 0        | ?         | #DIV/0!      | ?        |
| 0        | 0        | ?         | #DIV/0!      | ?        |
| 36.5     | 35       | 0.718484  | -0.763559804 | 0.745037 |
| 0        | 0        | ?         | #DIV/0!      | ?        |
| 191.5    | 208      | 0.967861  | -0.073405942 | 0.912282 |
| 0        | 0        | ?         | #DIV/0!      | ?        |
| 0        | 0        | ?         | #DIV/0!      | ?        |
| 0        | 0        | ?         | #DIV/0!      | ?        |
| 0        | 0        | ?         | #DIV/0!      | ?        |
| 3        | 1        | 1         | 0            | 0.559404 |
| 2.5      | 1        | 0.0714215 | #NUM!        | 0.353387 |
| 2.10604  | 2.26605  | 0.404855  | -2.742602952 | 0.369496 |
| 2.10604  | 2.26605  | 0.404855  | -2.742602952 | 0.369496 |
| 0.0006   | 1.87E-07 | 0.308228  | 11.29318487  | 0.308068 |
| 0.95348  | 0.01641  | 0.471829  | -1.60935254  | 0.729768 |
| 312.5    | 353.5    | 0.885288  | -0.279283757 | 0.801963 |
| 0        | 0        | ?         | #DIV/0!      | ?        |
| 0        | 0        | ?         | #DIV/0!      | ?        |
| 0        | 0        | 0.308068  | #DIV/0!      | 0.308068 |
| 0        | 0        | 0.308068  | #DIV/0!      | 0.308068 |
| 2.5      | 2        | 0.717686  | -0.736965594 | 0.855216 |
| 0        | 0        | ?         | #DIV/0!      | ?        |
| 0        | 0        | ?         | #DIV/0!      | ?        |
| 497.5    | 477.5    | 0.859352  | -0.252920328 | 0.894136 |
| 0        | 0        | ?         | #DIV/0!      | ?        |
| 0        | 0        | ?         | #DIV/0!      | ?        |
| 0.5      | 0        | 0.308068  | #NUM!        | 1        |
| 1        | 0.5      | 0.353387  | #NUM!        | 0.622002 |
| 4.5      | 6        | 0.663808  | -1.584962501 | 0.523243 |
| 207.5    | 178.5    | 0.958107  | -0.10077777  | 0.955119 |
| 10       | 5.5      | 0.787403  | 0.432959407  | 0.548751 |
| 0        | 0        | ?         | #DIV/0!      | ?        |
| 205.5    | 143.5    | 0.425139  | -0.776103988 | 0.816586 |
| 1163.5   | 1136     | 0.968684  | -0.073772186 | 0.983527 |
| 3.30E-14 | 0        | ?         | #NUM!        | ?        |
| 0        | 0        | ?         | #DIV/0!      | ?        |
| 3.41283  | 5.3999   | 0.788634  | -0.575381575 | 0.476415 |
| 0        | 0.5      | 0.622002  | #DIV/0!      | 0.622002 |
| 4.10E-10 | 2.79775  | 1         | 5.122890629  | 0.308068 |
| 266      | 296.001  | 0.934827  | -0.136419198 | 0.85439  |
| 56.5445  | 24.4963  | 0.488578  | -1.141333712 | 0.978703 |
| 10.5802  | 2.3134   | 0.255288  | -1.60435694  | 0.832608 |
| 2.5      | 2        | 0.743666  | 0.678071905  | 0.665262 |
| 46       | 40.5     | 0.700082  | -0.908852112 | 0.772993 |
| 10.168   | 1        | 0.0051902 | -4.185353577 | 0.757811 |
| 6.02368  | 8.70085  | 0.936093  | 0.200714706  | 0.87424  |
| 16.3255  | 15.4756  | 0.720936  | -0.891841957 | 0.750723 |
| 15.4632  | 26.6224  | 0.934894  | 0.223040035  | 0.787757 |
| 262.5    | 246.5    | 0.974256  | -0.050331676 | 0.979975 |
| 165      | 195.5    | 0.9616    | -0.104227369 | 0.860797 |

|         |          |          |              |          |
|---------|----------|----------|--------------|----------|
| 1439    | 1217     | 0.669589 | -0.791278423 | 0.784411 |
| 0       | 0.5      | 0.450185 | #DIV/0!      | 1        |
| 2       | 2.5      | 0.610398 | -2           | 0.504632 |
| 0       | 0        | 0.308068 | #DIV/0!      | 0.308068 |
| 32      | 28       | 0.758638 | -0.573735245 | 0.848316 |
| 0.21551 | 0        | 0.308068 | #NUM!        | 1        |
| 7       | 15.5     | 0.925995 | 0.280107919  | 0.669855 |
| 0.5     | 2        | 0.663808 | 1.584962501  | 0.825659 |
| 7.91016 | 19.9601  | 0.830153 | -0.990210033 | 0.411678 |
| 0       | 0        | ?        | #DIV/0!      | ?        |
| 528.5   | 594      | 0.858963 | -0.409135041 | 0.790325 |
| 26.9451 | 42.9153  | 0.812832 | -0.509828746 | 0.495958 |
| 0       | 0        | ?        | #DIV/0!      | ?        |
| 0       | 0        | ?        | #DIV/0!      | ?        |
| 0       | 0        | ?        | #DIV/0!      | ?        |
| 70      | 84.5     | 0.996028 | 0.010268335  | 0.889347 |
| 2       | 3        | 0.860525 | -0.415037499 | 0.606286 |
| 3       | 6        | 0.904922 | 0.222392421  | 0.562529 |
| 88.5    | 128      | 0.426503 | -1.51340924  | 0.21939  |
| 254.5   | 242      | 0.791637 | -0.414093018 | 0.831578 |
| 41.867  | 80.6022  | 0.81798  | -0.349885041 | 0.275688 |
| 1       | 1.5      | 0.474021 | #NUM!        | 0.308068 |
| 2.83446 | 5.65752  | 0.811651 | 0.660682423  | 0.864403 |
| 2.5     | 0        | 0.544016 | -1.321928095 | 0.680109 |
| 4.49296 | 9.49296  | 0.984743 | -0.037615067 | 0.426177 |
| 384.151 | 213.999  | 0.718942 | 0.591034932  | 0.512205 |
| 71.5804 | 61.378   | 0.781926 | -0.482071718 | 0.88971  |
| 341.5   | 298      | 0.834075 | -0.301999602 | 0.945422 |
| 1525.5  | 1387.5   | 0.871546 | -0.271285716 | 0.939011 |
| 319.351 | 198.681  | 0.342452 | -1.095769701 | 0.765744 |
| 0       | 0.5      | 0.450185 | #DIV/0!      | 1        |
| 0       | 0        | ?        | #DIV/0!      | ?        |
| 121     | 105      | 0.384995 | -1.111508315 | 0.500007 |
| 0.00388 | 0.01171  | 0.305521 | 6.130621852  | 0.317445 |
| 141.426 | 132.983  | 0.504393 | -0.947605374 | 0.554944 |
| 228     | 229      | 0.609273 | -0.884522783 | 0.606019 |
| 4       | 1.5      | 0.574988 | -1           | 0.885352 |
| 471.561 | 414.253  | 0.588955 | -0.84928794  | 0.690739 |
| 462.556 | 398.961  | 0.460319 | -0.993421533 | 0.58417  |
| 117.383 | 126.285  | 0.197303 | -1.611230226 | 0.163503 |
| 8.5     | 11       | 0.810247 | 0.556393349  | 0.927917 |
| 63.5    | 111      | 0.991846 | -0.022900402 | 0.627946 |
| 42      | 45.5     | 0.914204 | -0.222392421 | 0.864773 |
| 1.10234 | 0.50091  | 0.345864 | -86.77286763 | 0.647082 |
| 286     | 325      | 0.67008  | -0.78049297  | 0.576814 |
| 2.5     | 5        | 0.929192 | 0.263034406  | 0.725181 |
| 0       | 0        | ?        | #DIV/0!      | ?        |
| 0.16667 | 0.08333  | 0.353387 | 0.999995672  | 0.198892 |
| 192     | 195.5    | 0.960096 | -0.097122467 | 0.948945 |
| 0.98431 | 1.99E-20 | 0.323922 | -4.716673284 | 0.965797 |
| 1.5     | 0        | 1        | 0            | 0.329316 |
| 80.3765 | 81.6839  | 0.536668 | 0.773063767  | 0.545424 |
| 59.5    | 52.5     | 0.889059 | 0.254929356  | 0.822951 |
| 5.5     | 5        | 0.775228 | -0.652076697 | 0.82986  |
| 6       | 9.00819  | 0.65588  | -0.774548189 | 0.356246 |
| 58      | 88       | 0.976255 | 0.072756342  | 0.790165 |



|          |          |          |              |          |
|----------|----------|----------|--------------|----------|
| 9.25E-43 | 5.12E-14 | 0.308062 | 128.8685585  | 0.308062 |
| 286.845  | 254.571  | 0.754516 | -0.351783368 | 0.879836 |
| 0.5      | 0.5      | 0.651448 | 1            | 0.651448 |
| 0        | 0.5      | 1        | #DIV/0!      | 0.308068 |
| 349.5    | 294.5    | 0.559463 | -0.714439025 | 0.722037 |
| 0        | 0        | ?        | #DIV/0!      | ?        |
| 685.5    | 150      | 0.936205 | 0.113290027  | 0.42623  |
| 42       | 26       | 0.860618 | 0.26589406   | 0.620047 |
| 1663.98  | 1466.3   | 0.387549 | -0.928279387 | 0.504627 |
| 178.527  | 156.506  | 0.878448 | -0.235672695 | 0.9778   |
| 0        | 0        | ?        | #DIV/0!      | ?        |
| 7.5      | 21       | 1        | 0            | 0.286561 |
| 4268.44  | 3906.81  | 0.546192 | -1.00293675  | 0.612386 |
| 16.7256  | 30.0212  | 0.944211 | -0.214647271 | 0.643371 |
| 24       | 30       | 0.500795 | -1.584962501 | 0.370995 |
| 12.211   | 17.5227  | 0.888477 | 0.343761057  | 0.931002 |
| 0.16667  | 0.08333  | 0.353387 | 0.999995672  | 0.198892 |
| 0.16667  | 0.08333  | 0.353387 | 0.999995672  | 0.198892 |
| 0.5      | 0        | 0.308068 | #NUM!        | 1        |
| 2.49E-25 | 2.13604  | 1        | -18.75162105 | 0.308068 |
| 4.59821  | 2.43526  | 0.615509 | -1.163324673 | 0.938443 |
| 21       | 36       | 0.716663 | -0.637429921 | 0.317369 |
| 7.83E-05 | 7.90657  | 0.531546 | 15.91000651  | 0.682748 |
| 0.00686  | 2.74E-05 | 0.280989 | -10.73629897 | 0.996713 |
| 10       | 15       | 0.875421 | 0.321928095  | 0.875421 |
| 57.0282  | 47.3599  | 0.897744 | -0.236778743 | 0.987671 |
| 0        | 0        | ?        | #DIV/0!      | ?        |
| 53       | 53       | 0.960826 | 0.092258508  | 0.960826 |
| 2.5      | 1.5      | 0.490574 | -1.321928095 | 0.810902 |
| 2.62355  | 4.3368   | 0.773081 | 0.726952406  | 0.999253 |
| 199      | 180      | 0.967013 | 0.074181813  | 0.907608 |
| 0        | 1        | 0.622002 | #DIV/0!      | 0.622002 |
| 222.5    | 230      | 0.871123 | -0.297815639 | 0.848241 |
| 125.759  | 162.009  | 0.850546 | -0.441616502 | 0.696526 |
| 31.5     | 44.5     | 0.892601 | 0.326500825  | 0.93268  |
| 71       | 57       | 0.94159  | 0.135655099  | 0.826709 |
| 11.6183  | 21.3871  | 0.59406  | 0.99877015   | 0.9312   |
| 241.984  | 273.705  | 0.702402 | 0.706725486  | 0.760829 |
| 1.23E-31 | 6.17E-24 | ?        | 36.04226041  | ?        |
| 0        | 0        | ?        | #DIV/0!      | ?        |
| 44.5     | 51.5     | 0.837111 | -0.38827059  | 0.733667 |
| 0.5      | 0.5      | 0.513713 | 1.584962501  | 0.513713 |
| 102.5    | 113.5    | 0.950878 | -0.124891248 | 0.887783 |
| 45       | 32.5     | 0.75964  | -0.321928095 | 0.904574 |
| 76.9948  | 97.3182  | 0.770411 | -0.43153306  | 0.564633 |
| 13.1467  | 18.965   | 0.919182 | 0.219962026  | 0.864328 |
| 1        | 0.5      | 0.651448 | -1           | 1        |
| 12.5     | 13.5     | 0.742446 | -0.736965594 | 0.694615 |
| 3.60076  | 3.83987  | 0.334038 | -58.33267576 | 0.308065 |
| 1        | 0        | 0.622002 | 1            | 0.353387 |
| 2.5      | 0.5      | 0.513713 | -0.736965594 | 0.513713 |
| 160.5    | 162.5    | 0.981158 | 0.04425792   | 0.988694 |
| 0        | 0.5      | 1        | #DIV/0!      | 0.308068 |
| 52.5     | 45.5     | 0.737293 | -0.447458977 | 0.865742 |
| 120.5    | 132.5    | 0.93714  | -0.138102277 | 0.869281 |
| 68.5     | 62.5     | 0.947608 | 0.111421283  | 0.890868 |

|         |          |           |              |           |
|---------|----------|-----------|--------------|-----------|
| 48.5    | 42.5     | 0.643664  | -0.818553129 | 0.738616  |
| 0       | 0        | ?         | #DIV/0!      | ?         |
| 0       | 0        | ?         | #DIV/0!      | ?         |
| 0       | 0.5      | 1         | #DIV/0!      | 0.308068  |
| 0.5     | 0        | 0.308068  | #NUM!        | 1         |
| 12.1785 | 9.84711  | 0.367558  | -4.482050242 | 0.459558  |
| 0       | 0        | ?         | #DIV/0!      | ?         |
| 2083.06 | 1611.48  | 0.713903  | -0.646703355 | 0.889931  |
| 146.5   | 143.5    | 0.973369  | 0.062630988  | 0.96109   |
| 0       | 1        | 0.308068  | #DIV/0!      | 0.308068  |
| 0       | 0        | ?         | #DIV/0!      | ?         |
| 119.5   | 113      | 0.787885  | -0.491475872 | 0.826746  |
| 3.36162 | 4.13506  | 0.955288  | -0.127238415 | 0.835168  |
| 0.61826 | 2.25E-17 | 0.539445  | 1.343952916  | 0.337236  |
| 3.48209 | 6.84001  | 0.810577  | 0.431976523  | 0.676141  |
| 0.01133 | 8.81E-06 | 0.308069  | -19.13247717 | 0.999301  |
| 2       | 2        | 1         | 0            | 1         |
| 0.44307 | 1.09498  | 0.719933  | 1.063252761  | 0.898975  |
| 1.50856 | 1.50422  | 0.997043  | -0.008209577 | 0.998543  |
| 13.5    | 10.5     | 0.944316  | 0.103093493  | 0.78142   |
| 324.5   | 254      | 0.908887  | -0.174656522 | 0.917455  |
| 1.5     | 0.5      | 0.329316  | #NUM!        | 0.724378  |
| 47.5    | 35.5     | 0.839451  | -0.399930607 | 0.992944  |
| 204     | 181      | 0.926094  | 0.157297393  | 0.85471   |
| 75.5    | 75       | 0.917917  | -0.19401062  | 0.922215  |
| 0       | 0        | ?         | #DIV/0!      | ?         |
| 29.119  | 44.5752  | 0.942061  | -0.157518601 | 0.661548  |
| 297.874 | 228.321  | 0.357361  | -0.9973193   | 0.6042    |
| 8       | 13       | 1         | 0            | 0.674091  |
| 1138.42 | 1195.58  | 0.0789597 | -1.021299734 | 0.0635293 |
| 102.5   | 136      | 0.687331  | -1.171685459 | 0.53193   |
| 153.5   | 233.5    | 0.880756  | -0.373351596 | 0.62907   |
| 118.5   | 166      | 0.838653  | -0.479352313 | 0.628853  |
| 3126    | 2833.5   | 0.522617  | -1.280305725 | 0.586737  |
| 2736.5  | 2304.5   | 0.4708    | -1.333972131 | 0.586302  |
| 1.5     | 0        | 0.308068  | #NUM!        | 1         |
| 32.5    | 36.5     | 0.856165  | 0.335184192  | 0.923381  |
| 915.169 | 1163.59  | 0.48571   | -1.950466585 | 0.35794   |
| 693.422 | 722.862  | 0.867414  | -0.27402314  | 0.83553   |
| 20.5    | 8        | 0.55724   | -0.602664502 | 0.64061   |
| 0       | 0        | ?         | #DIV/0!      | ?         |
| 7.12472 | 17.9518  | 0.871733  | -0.715134951 | 0.453623  |
| 0       | 0        | ?         | #DIV/0!      | ?         |
| 395.5   | 461      | 0.997101  | 0.007277166  | 0.908286  |
| 2.5     | 4.5      | 0.672563  | -1.321928095 | 0.355889  |
| 4       | 1        | 1         | 0            | 0.398521  |
| 143.5   | 160.5    | 0.826734  | -0.430197306 | 0.750601  |
| 0       | 0        | ?         | #DIV/0!      | ?         |
| 0       | 0        | ?         | #DIV/0!      | ?         |
| 23      | 19       | 0.897136  | 0.204358499  | 0.782955  |
| 155.5   | 152      | 0.29472   | -0.958842675 | 0.313647  |
| 8.022   | 7.77048  | 0.979953  | -0.050570066 | 0.998201  |
| 7.5     | 9        | 0.649459  | 1            | 0.714252  |
| 2       | 2.5      | 0.545627  | 0.584962501  | 0.756486  |
| 2       | 8        | 0.895809  | 0.584962501  | 0.527911  |
| 16.5    | 20       | 0.857272  | -0.343954401 | 0.7215    |



|          |          |           |              |          |
|----------|----------|-----------|--------------|----------|
| 660.695  | 664.319  | 0.95252   | -0.09981333  | 0.948632 |
| 8.95713  | 7.4508   | 0.876982  | 0.204614086  | 0.746589 |
| 0.5      | 1        | 1         | 0            | 0.651448 |
| 21.5     | 30.5     | 0.968116  | -0.10433666  | 0.781172 |
| 878.806  | 845.472  | 0.936116  | -0.125296592 | 0.965205 |
| 8.5      | 3        | 0.890732  | 0.234465254  | 0.535903 |
| 1        | 3        | 0.130218  | 3.459431619  | 0.196267 |
| 213.336  | 248.811  | 0.89243   | -0.182655713 | 0.747682 |
| 126      | 161      | 0.962167  | -0.106915204 | 0.817489 |
| 808      | 870      | 0.724585  | -0.755836368 | 0.676932 |
| 12.3622  | 18.6266  | 0.892121  | -0.334313605 | 0.646002 |
| 109.5    | 105      | 0.902141  | -0.220198208 | 0.930416 |
| 298.629  | 47.8944  | 0.0361791 | -1.522214719 | 0.373389 |
| 20       | 17       | 0.773154  | -0.567040593 | 0.875966 |
| 1        | 0.5      | 0.353387  | #NUM!        | 0.622002 |
| 45.175   | 67.5444  | 0.984852  | 0.03268361   | 0.69963  |
| 223.5    | 235.5    | 0.886806  | 0.261958169  | 0.917126 |
| 129      | 134.5    | 0.769719  | -0.543621705 | 0.740097 |
| 657.634  | 598.975  | 0.584655  | -0.840978161 | 0.659466 |
| 31.3519  | 20.7765  | 0.946145  | 0.128965733  | 0.757676 |
| 0        | 0        | ?         | #DIV/0!      | ?        |
| 113.5    | 152      | 0.741657  | -0.804180674 | 0.562853 |
| 30.9697  | 56.5517  | 0.710111  | 0.925150112  | 0.975651 |
| 4.5      | 7.5      | 0.902586  | 0.289506617  | 0.807419 |
| 0        | 0        | ?         | #DIV/0!      | ?        |
| 71       | 114      | 0.702236  | -1.394859617 | 0.466439 |
| 0        | 0        | ?         | #DIV/0!      | ?        |
| 0        | 0        | ?         | #DIV/0!      | ?        |
| 236.5    | 212      | 0.921786  | -0.178337241 | 0.991446 |
| 0        | 0        | ?         | #DIV/0!      | ?        |
| 0        | 0        | ?         | #DIV/0!      | ?        |
| 0        | 0        | ?         | #DIV/0!      | ?        |
| 0        | 0        | ?         | #DIV/0!      | ?        |
| 11.1373  | 8.57953  | 0.518313  | -1.508941906 | 0.669501 |
| 70       | 45.5     | 0.840041  | -0.283792966 | 0.846312 |
| 376.184  | 91.7998  | 0.512228  | -0.863872182 | 0.649799 |
| 1        | 1.5      | 0.545627  | #NUM!        | 0.3832   |
| 17       | 22.5     | 0.897566  | -0.280107919 | 0.718236 |
| 4.02643  | 2.72786  | 0.17047   | -8.422551894 | 0.311385 |
| 1.12236  | 2.23238  | 0.64117   | -4.039475977 | 0.366781 |
| 54       | 60       | 0.849474  | 0.364053571  | 0.907199 |
| 166      | 123      | 0.861189  | -0.245756414 | 0.908823 |
| 3.23883  | 4.8891   | 0.921583  | -0.241802411 | 0.676762 |
| 4.5      | 5.5      | 0.886945  | -0.362570079 | 0.777386 |
| 4.34E-41 | 2.38E-13 | 0.308068  | 129.3511742  | 0.308068 |
| 1645.72  | 1215.01  | 0.463968  | -1.171590911 | 0.687683 |
| 5.51E-28 | 1.32E-13 | 0.308068  | 84.97467825  | 0.308068 |
| 1        | 2        | 0.834708  | 0.584962501  | 0.834708 |
| 7.86E-41 | 9.36E-28 | 0.308068  | 129.3508573  | 0.308068 |
| 436.501  | 329.501  | 0.864264  | -0.284015864 | 0.949203 |
| 73.882   | 77.9534  | 0.600722  | -0.46654451  | 0.534608 |
| 791      | 744.5    | 0.868505  | -0.302228429 | 0.909064 |
| 62       | 81.5     | 0.909992  | -0.226275856 | 0.723222 |
| 9.91E-28 | 2.38E-13 | 0.308068  | 84.97467679  | 0.308068 |
| 0.19297  | 0.38381  | 0.641171  | -4.039476695 | 0.366781 |
| 1        | 4        | 0.663808  | 1.584962501  | 0.825659 |

|          |          |           |              |           |
|----------|----------|-----------|--------------|-----------|
| 514.5    | 436      | 0.823392  | -0.294500266 | 0.968936  |
| 5.51E-28 | 1.32E-13 | 0.308068  | 84.97467825  | 0.308068  |
| 3.09E-28 | 7.40E-14 | 0.308068  | 84.97467445  | 0.308068  |
| 294.5    | 240      | 0.576152  | -1.093599367 | 0.710978  |
| 76.5     | 81.5     | 0.769026  | -0.59917636  | 0.72714   |
| 592.691  | 527.754  | 0.198074  | -1.268352088 | 0.273096  |
| 6.983    | 9.46134  | 0.933831  | -0.093974082 | 0.592165  |
| 1.5      | 0        | 0.034897  | #NUM!        | 1         |
| 22.0445  | 21.4028  | 0.250401  | -1.500262451 | 0.267825  |
| 108.5    | 103      | 0.929849  | -0.117695043 | 0.975197  |
| 2.5      | 1.5      | 0.490574  | -1.321928095 | 0.810902  |
| 148.327  | 106.174  | 0.986986  | -0.02840673  | 0.825545  |
| 21.392   | 16.0416  | 0.392662  | -1.024444167 | 0.647694  |
| 36.764   | 35.7444  | 0.878071  | -0.303639974 | 0.895716  |
| 18       | 18.5     | 0.91128   | -0.169925001 | 0.889302  |
| 431.5    | 444.5    | 0.984575  | -0.035540326 | 0.96549   |
| 265.5    | 313.5    | 0.932536  | -0.163824802 | 0.820984  |
| 1106     | 1128     | 0.561902  | -1.570039055 | 0.55097   |
| 37.4036  | 38.8877  | 0.841644  | -0.356640691 | 0.813716  |
| 0.5      | 0.5      | 0.651448  | 1            | 0.651448  |
| 11.5     | 12.5     | 0.689347  | -0.716207034 | 0.627649  |
| 8.5      | 7.5      | 0.95952   | 0.08246216   | 0.879211  |
| 75.4333  | 57.9521  | 0.395338  | -0.907826611 | 0.652377  |
| 1918.68  | 1746.64  | 0.539153  | -0.832292361 | 0.620754  |
| 5        | 11       | 0.96043   | 0.137503524  | 0.595204  |
| 606.681  | 563.713  | 0.612154  | -0.570753922 | 0.688565  |
| 491.026  | 475.064  | 0.749659  | -0.457614066 | 0.778301  |
| 1.47898  | 16.2413  | 0.948958  | 0.522398562  | 0.225706  |
| 207.5    | 190      | 0.922659  | -0.127111918 | 1         |
| 408.5    | 387      | 0.936371  | -0.12537036  | 0.976573  |
| 117      | 92.5     | 0.549502  | -1.362570079 | 0.688427  |
| 219.915  | 224.017  | 0.826009  | 0.39470244   | 0.836086  |
| 257.5    | 222      | 0.695616  | -0.45383977  | 0.846545  |
| 2.5      | 5        | 0.712334  | 0.847996907  | 0.925659  |
| 0        | 1        | 1         | #DIV/0!      | 0.308068  |
| 373.5    | 307      | 0.873121  | -0.245756414 | 0.982535  |
| 1.65701  | 4.3398   | 0.868014  | -0.79249357  | 0.446623  |
| 95.0565  | 57.9983  | 0.698594  | 0.786337116  | 0.558808  |
| 24.8252  | 50.4154  | 0.775792  | -0.767943262 | 0.355601  |
| 0        | 0        | ?         | #DIV/0!      | ?         |
| 157.451  | 163.46   | 0.897031  | -0.237641778 | 0.871475  |
| 117.822  | 94.8519  | 0.982127  | -0.036129704 | 0.87774   |
| 427.5    | 465.5    | 0.798411  | -0.393266877 | 0.727336  |
| 1125     | 1241     | 0.0470818 | -1.070966521 | 0.0298579 |
| 1005.5   | 1118     | 0.731773  | -0.683678519 | 0.659137  |
| 26.5     | 30.5     | 0.669976  | 0.715023041  | 0.742745  |
| 3.16383  | 5.98864  | 0.844872  | -0.509001897 | 0.456203  |
| 64.5297  | 143.202  | 0.735197  | -1.617514468 | 0.373855  |
| 161      | 155.5    | 0.258641  | -0.517135687 | 0.305512  |
| 0        | 0        | ?         | #DIV/0!      | ?         |
| 163.193  | 165.829  | 0.799442  | -0.534949595 | 0.78936   |
| 0        | 0        | ?         | #DIV/0!      | ?         |
| 4.5      | 8        | 0.900678  | -0.362570079 | 0.584676  |
| 2.30992  | 3.12737  | 0.893548  | 0.181074015  | 0.826127  |
| 319.5    | 260      | 0.817531  | -0.377157616 | 0.964775  |
| 276.273  | 426.753  | 0.360095  | -1.301025191 | 0.130781  |

|          |          |          |              |          |
|----------|----------|----------|--------------|----------|
| 2.00704  | 4.00704  | 0.92642  | -0.306699739 | 0.577833 |
| 817.175  | 667.926  | 0.686945 | -0.464816397 | 0.890517 |
| 2        | 1.53613  | 0.598711 | -1           | 0.773761 |
| 3.77E-05 | 2.35087  | 0.107347 | 17.15103092  | 0.284001 |
| 519      | 334.5    | 0.546759 | -0.91630292  | 0.879316 |
| 92.8039  | 130.201  | 0.86054  | -0.443523391 | 0.662502 |
| 237      | 277.5    | 0.985759 | -0.040120308 | 0.897467 |
| 8.43519  | 8.84653  | 0.55334  | 1.191062798  | 0.567593 |
| 51       | 36.5     | 0.393678 | -1.86507042  | 0.588352 |
| 39.089   | 20.7371  | 0.556521 | -0.579416681 | 0.799968 |
| 1        | 1        | 1        | 0            | 1        |
| 0.38132  | 5.469    | 0.940803 | -4.229563754 | 0.310533 |
| 1722.5   | 1838.5   | 0.858084 | -0.264458959 | 0.802601 |
| 2.42E-41 | 4.17E-26 | 0.308068 | 129.3505841  | 0.308068 |
| 0.12376  | 0.38381  | 0.732234 | -10.23927109 | 0.328116 |
| 107.843  | 99.3862  | 0.898524 | -0.217124534 | 0.955325 |
| 354      | 350      | 0.824307 | -0.37749313  | 0.832726 |
| 168.5    | 184      | 0.980658 | -0.043457956 | 0.920889 |
| 129.237  | 77.2896  | 0.730211 | -0.522992398 | 0.910714 |
| 0.5      | 2        | 0.663808 | 1.584962501  | 0.825659 |
| 2        | 1        | 1        | 0            | 0.710482 |
| 0        | 0        | ?        | #DIV/0!      | ?        |
| 93.3265  | 121.517  | 0.938453 | -0.168026971 | 0.773916 |
| 0.5      | 0        | 0.308068 | #NUM!        | 1        |
| 2766.5   | 2382.5   | 0.624373 | -0.65988284  | 0.757508 |
| 0.5      | 1.5      | 1        | 0            | 0.252216 |
| 1164     | 1093.5   | 0.865863 | -0.293851153 | 0.909581 |
| 805.826  | 759.832  | 0.887334 | -0.226077447 | 0.931443 |
| 1148.86  | 1100.64  | 0.745734 | -0.491072969 | 0.781137 |
| 14.9363  | 17.2808  | 0.872823 | 0.349467914  | 0.945356 |
| 12.3616  | 15.7852  | 0.929795 | -0.189128127 | 0.775881 |
| 847      | 690.5    | 0.68897  | -0.621619406 | 0.848339 |
| 70.2922  | 85.9065  | 0.899706 | -0.236762659 | 0.75758  |
| 85.637   | 85.5716  | 0.867699 | -0.316154949 | 0.868205 |
| 118.5    | 152.5    | 0.921748 | 0.209288834  | 0.934388 |
| 8        | 8.5      | 0.843819 | 0.321928095  | 0.882345 |
| 2        | 0        | 0        | #NUM!        | ?        |
| 19.5     | 12       | 0.906411 | -0.156119202 | 0.748532 |
| 85       | 86       | 0.905213 | -0.229481846 | 0.897693 |
| 0        | 1.5      | 0.399441 | #DIV/0!      | 0.822295 |
| 0        | 0        | ?        | #DIV/0!      | ?        |
| 0        | 0.5      | 0.450185 | #DIV/0!      | 1        |
| 20.0723  | 12.8053  | 0.825324 | -0.460661204 | 0.942671 |
| 122      | 126      | 0.907636 | -0.149377624 | 0.877184 |
| 1        | 0.5      | 0.353387 | #NUM!        | 0.622002 |
| 1.63E-16 | 2.25E-11 | ?        | 18.47363719  | ?        |
| 760.023  | 678.021  | 0.559128 | -0.554149717 | 0.69392  |
| 191.5    | 171      | 0.401552 | -1.603920658 | 0.472648 |
| 15.8475  | 16.9842  | 0.803461 | -0.306455563 | 0.733567 |
| 63.5     | 57.5     | 0.901023 | -0.19426882  | 0.975162 |
| 42       | 36.5     | 0.560853 | -0.966052668 | 0.665871 |
| 0        | 0        | ?        | #DIV/0!      | ?        |
| 1108.5   | 1056.5   | 0.824767 | -0.370400194 | 0.860412 |
| 44       | 57.5     | 0.555079 | -1.289506617 | 0.388413 |
| 81       | 102.5    | 0.890239 | -0.273760812 | 0.728912 |
| 1        | 4.5      | 0.907467 | 0.584962501  | 0.503591 |

|         |         |          |              |           |
|---------|---------|----------|--------------|-----------|
| 1.83211 | 34.943  | 0.859591 | 1.63818708   | 0.241737  |
| 22.1665 | 51.489  | 0.943153 | 0.212629332  | 0.609996  |
| 63.0778 | 53.3987 | 0.471835 | -0.923231401 | 0.617931  |
| 1202    | 1190.5  | 0.485998 | -1.210241242 | 0.492749  |
| 51.5    | 42.5    | 0.732887 | -0.419713986 | 0.915525  |
| 72.6343 | 74.4211 | 0.437407 | -2.26629354  | 0.424848  |
| 27.5    | 26      | 0.780302 | -0.611434712 | 0.813908  |
| 0.1     | 0       | 0.308068 | -77.66315795 | 1         |
| 9.83286 | 15.8654 | 0.710459 | -1.316701074 | 0.468991  |
| 51.5    | 56.5    | 0.794434 | -0.419713986 | 0.719834  |
| 0       | 0       | ?        | #DIV/0!      | ?         |
| 760.428 | 726.099 | 0.770564 | -0.362306662 | 0.815733  |
| 151.5   | 151.5   | 0.858539 | -0.366657037 | 0.858539  |
| 38.1504 | 51.7452 | 0.549985 | -1.985335623 | 0.394474  |
| 1       | 0       | 0.622002 | -1           | 0.622002  |
| 258.5   | 325     | 0.725205 | -0.87959415  | 0.58868   |
| 303.5   | 297     | 0.710307 | -0.641926361 | 0.726477  |
| 3448.63 | 1372.79 | 0.997667 | -0.003807718 | 0.52239   |
| 27.1764 | 21.2876 | 0.690217 | -0.783169599 | 0.845675  |
| 0       | 0       | ?        | #DIV/0!      | ?         |
| 0       | 0       | ?        | #DIV/0!      | ?         |
| 23.8072 | 13.4263 | 0.113123 | -1.707957502 | 0.470001  |
| 0       | 0       | ?        | #DIV/0!      | ?         |
| 0.5     | 5.5     | 0.681777 | 2            | 0.368766  |
| 637.917 | 596.876 | 0.811106 | -0.337176759 | 0.868401  |
| 857     | 1243    | 0.66095  | -1.046183868 | 0.430654  |
| 31.5    | 35      | 0.536325 | -2.276840205 | 0.485297  |
| 6       | 9       | 0.924624 | -0.263034406 | 0.708593  |
| 76      | 93.5    | 0.979151 | -0.048255169 | 0.835058  |
| 0       | 0       | ?        | #DIV/0!      | ?         |
| 64      | 59.5    | 0.975163 | -0.04580369  | 0.968958  |
| 1       | 0.5     | 0.651448 | -1           | 1         |
| 585     | 602     | 0.995848 | 0.009831009  | 0.986508  |
| 511.5   | 637.5   | 0.874531 | -0.335032326 | 0.731923  |
| 210.5   | 286     | 0.874278 | -0.373380515 | 0.68781   |
| 0       | 0       | ?        | #DIV/0!      | ?         |
| 142     | 203.5   | 0.832027 | -0.557290082 | 0.624442  |
| 99.5    | 146.5   | 0.852733 | -0.497073268 | 0.632975  |
| 18.5    | 17.5    | 0.463651 | -1.887525271 | 0.494455  |
| 188     | 232     | 0.762642 | -0.760172985 | 0.639231  |
| 222.796 | 270.002 | 0.986805 | 0.033462348  | 0.894548  |
| 25      | 30      | 0.937246 | -0.152003093 | 0.814135  |
| 0.65014 | 13.0681 | 0.88728  | 0.825495929  | 0.0352699 |
| 0       | 0       | ?        | #DIV/0!      | ?         |
| 2       | 3.5     | 0.320255 | #NUM!        | 0.129088  |
| 234.5   | 244.5   | 0.755463 | -0.556031499 | 0.724792  |
| 37      | 33.5    | 0.667334 | -0.654864514 | 0.748298  |
| 34.5    | 26      | 0.999999 | 0            | 0.835139  |
| 33      | 28      | 0.528004 | -1           | 0.653937  |
| 124.638 | 107.484 | 0.604714 | -0.942418689 | 0.70864   |
| 0.5     | 0       | 0.308068 | #NUM!        | 1         |
| 132.629 | 128.594 | 0.981868 | -0.035001297 | 0.995121  |
| 10      | 17.5    | 0.878877 | 0.378511623  | 0.819674  |
| 0       | 0       | ?        | #DIV/0!      | ?         |
| 118.673 | 115.008 | 0.827055 | -0.432183763 | 0.847265  |
| 0       | 1       | 0.622002 | #DIV/0!      | 0.622002  |

|          |         |           |              |           |
|----------|---------|-----------|--------------|-----------|
| 6        | 15      | 0.561007  | -1.263034406 | 0.102344  |
| 0        | 0       | ?         | #DIV/0!      | ?         |
| 0.5      | 0       | 1         | 0            | 0.450185  |
| 333.263  | 366.139 | 0.979941  | -0.044800967 | 0.915459  |
| 1.24E-12 | 1.80221 | 0.999944  | 26.43497386  | 0.308093  |
| 13.3432  | 16.5998 | 0.608699  | -1.248772465 | 0.477287  |
| 1.08E-05 | 5.77131 | 0.523351  | 18.26428506  | 0.649852  |
| 0        | 0       | 0.308068  | #DIV/0!      | 0.308068  |
| 14.816   | 1.90657 | 0.0680123 | -9.46911985  | 0.745062  |
| 0        | 0       | 0.308068  | #DIV/0!      | 0.308068  |
| 6        | 2       | 1         | 0            | 0.559404  |
| 20       | 20.5    | 0.554181  | -1           | 0.535868  |
| 34.5     | 53      | 0.92716   | -0.250543462 | 0.694042  |
| 0        | 0.5     | 1         | #DIV/0!      | 0.308068  |
| 137.5    | 145.5   | 0.499591  | -1.026472211 | 0.456257  |
| 211.851  | 257.528 | 0.112377  | -1.063433414 | 0.0513916 |
| 242.816  | 226.7   | 0.838329  | -0.270494816 | 0.900418  |
| 5.5      | 3       | 0.193311  | #NUM!        | 0.429254  |
| 1189.5   | 902.5   | 0.707256  | -0.428236997 | 0.981611  |
| 0.5      | 1       | 0.559404  | 1.584962501  | 0.764931  |
| 0        | 0.5     | 1         | #DIV/0!      | 0.308068  |
| 15.7767  | 19.8879 | 0.909574  | -0.245631794 | 0.763877  |
| 0        | 0       | ?         | #DIV/0!      | ?         |
| 0        | 0       | ?         | #DIV/0!      | ?         |
| 7        | 6.5     | 0.490574  | -1.485426827 | 0.536334  |
| 582      | 535     | 0.651661  | -0.667205955 | 0.722121  |
| 25.4684  | 17.9835 | 0.64726   | -0.586308482 | 0.955346  |
| 1028.32  | 893.703 | 0.720661  | -0.626855509 | 0.820892  |
| 1276.67  | 1248.3  | 0.63711   | -0.8082485   | 0.653988  |
| 8.15119  | 9.45617 | 0.754225  | -0.737081824 | 0.66388   |
| 216.849  | 237.544 | 0.731188  | -0.609682712 | 0.663082  |
| 5        | 3.5     | 0.638203  | -1           | 0.848182  |
| 1.64E-19 | 0.5     | 1         | #NUM!        | 0.308068  |
| 30       | 36      | 0.388454  | 1.919657892  | 0.419255  |
| 205.5    | 152.5   | 0.397989  | -2.85010457  | 0.540423  |
| 86       | 103.5   | 0.353387  | -0.753839413 | 0.198892  |
| 108.627  | 80.3645 | 0.0650204 | -0.8447382   | 0.323886  |
| 557.379  | 780.041 | 0.858394  | 0.299898993  | 0.896378  |
| 158.5    | 150.5   | 0.822207  | -0.469135242 | 0.853902  |
| 3.5      | 1       | 0.484842  | 0.652076697  | 0.171713  |
| 56.1807  | 58.7036 | 0.73684   | -0.64636405  | 0.706336  |
| 2        | 0.5     | 0.0162766 | #NUM!        | 0.308068  |
| 0        | 0       | ?         | #DIV/0!      | ?         |
| 40.6113  | 28.7356 | 0.125861  | -1.462115323 | 0.337348  |
| 156.5    | 191     | 0.956208  | -0.120093845 | 0.837027  |
| 69.5     | 65.5    | 0.818229  | -0.418501355 | 0.858996  |
| 3        | 3.5     | 0.909362  | 0.222392421  | 1         |
| 187.324  | 142.304 | 0.681212  | -0.563948435 | 0.914583  |
| 386.175  | 354.196 | 0.666873  | -0.622803711 | 0.740519  |
| 17       | 25      | 0.9821    | -0.043068722 | 0.70668   |
| 218.46   | 204.949 | 0.907068  | -0.165568039 | 0.959963  |
| 40       | 54      | 0.934973  | -0.172180975 | 0.739797  |
| 62       | 105     | 0.975554  | 0.079226691  | 0.732334  |
| 90.5     | 120.5   | 0.978969  | -0.056902391 | 0.801946  |
| 873.718  | 815.545 | 0.472952  | -1.095236193 | 0.525583  |
| 41.5     | 63.5    | 0.931787  | 0.17954942   | 0.798432  |

|          |          |          |              |          |
|----------|----------|----------|--------------|----------|
| 41.5     | 30.5     | 0.793848 | -0.352671618 | 0.953405 |
| 162.528  | 187.199  | 0.577779 | -0.53774355  | 0.422727 |
| 7.5      | 5        | 0.958098 | 0.093109404  | 0.754736 |
| 98.5     | 149.5    | 0.935067 | 0.17884808   | 0.812636 |
| 1.15037  | 4.02955  | 0.989955 | 0.034963973  | 0.261315 |
| 0.5      | 1        | 0.559404 | 1.584962501  | 0.764931 |
| 27       | 24.5     | 0.987738 | 0.026472211  | 0.926585 |
| 176.009  | 160.606  | 0.755558 | -0.497476998 | 0.826705 |
| 6.69093  | 14.3069  | 0.744032 | -0.771850029 | 0.272241 |
| 5.59116  | 3.33884  | 0.84095  | -0.35681237  | 0.866222 |
| 2.39061  | 1.67992  | 0.987471 | -0.028787871 | 0.826208 |
| 39       | 27.5     | 0.837883 | 0.206450877  | 0.561854 |
| 3        | 4        | 1        | 0            | 0.847091 |
| 5.38036  | 6.39186  | 0.922766 | -0.188371883 | 0.806709 |
| 24       | 25.5     | 0.875766 | -0.375509135 | 0.842505 |
| 62.5     | 83.5     | 0.805703 | 0.46048047   | 0.979005 |
| 4.59E-19 | 0.14143  | 1        | -12.67952783 | 0.308068 |
| 67.4444  | 113.573  | 0.964508 | 0.093923499  | 0.687867 |
| 47.5     | 33.5     | 0.695142 | 0.658963082  | 0.561246 |
| 0        | 0        | ?        | #DIV/0!      | ?        |
| 1.5      | 0.5      | 0.329316 | #NUM!        | 0.724378 |
| 21.5     | 39.5     | 1        | 0            | 0.65199  |
| 290.5    | 309.5    | 0.795385 | -0.47849078  | 0.750202 |
| 4.30E-07 | 0.00057  | 0.99932  | -11.40083077 | 0.308068 |
| 6.5      | 11.5     | 0.870052 | 0.299560282  | 0.705789 |
| 15.2713  | 11.1737  | 0.940036 | -0.155320738 | 0.90257  |
| 0        | 0        | ?        | #DIV/0!      | ?        |
| 14.6675  | 6.69469  | 0.513232 | -0.901523987 | 0.908034 |
| 138.853  | 152.74   | 0.950034 | 0.116617279  | 0.990602 |
| 443.5    | 354.5    | 0.78026  | -0.428655639 | 0.950871 |
| 0        | 0        | ?        | #DIV/0!      | ?        |
| 3.5      | 8.5      | 0.901425 | 0.362570079  | 0.627595 |
| 3.5      | 4.5      | 1        | 0            | 0.8566   |
| 75       | 87.5     | 0.912209 | 0.214124805  | 0.99633  |
| 38.5     | 33.5     | 0.858405 | 0.31817596   | 0.786222 |
| 900.499  | 767.5    | 0.647895 | -0.561913066 | 0.801752 |
| 1.67E-08 | 2.02E-24 | 0.308068 | #NUM!        | 1        |
| 13.5     | 27.5     | 0.870455 | 0.332575339  | 0.631376 |
| 175.5    | 209      | 0.858297 | -0.331205908 | 0.732428 |
| 79.5     | 55.5     | 0.927588 | -0.153011619 | 0.856105 |
| 18       | 18.5     | 0.553892 | 1.256339753  | 0.561353 |
| 74.1359  | 81.0569  | 0.597794 | -0.620899753 | 0.510273 |
| 285.5    | 303      | 0.889794 | -0.29936594  | 0.8543   |
| 0        | 0        | ?        | #DIV/0!      | ?        |
| 13       | 8        | 0.919258 | -0.176877762 | 0.813812 |
| 112.238  | 117.398  | 0.967389 | -0.078256756 | 0.93906  |
| 305      | 306      | 0.687204 | -0.908369525 | 0.685189 |
| 1383.21  | 841.159  | 0.405212 | -1.916013077 | 0.682552 |
| 128      | 122      | 0.833281 | -0.422571172 | 0.863535 |
| 1.72E-06 | 0.34739  | 0.999997 | -1.456142942 | 0.308069 |
| 34.1885  | 23.0288  | 0.655261 | -0.744567205 | 0.931025 |
| 36       | 61       | 0.843195 | -0.584962501 | 0.553901 |
| 38.3778  | 46.8108  | 0.363255 | -4.746770227 | 0.280411 |
| 113.945  | 123.986  | 0.447705 | -1.105686799 | 0.384954 |
| 65.5     | 81       | 0.859424 | 0.324129003  | 0.99141  |
| 818.545  | 869.28   | 0.410468 | -1.287708214 | 0.369214 |

|         |         |           |              |           |
|---------|---------|-----------|--------------|-----------|
| 35.769  | 23.0165 | 0.545552  | 0.459743254  | 0.277045  |
| 1130.5  | 993     | 0.662984  | -0.552158227 | 0.785529  |
| 429.535 | 330.889 | 0.994794  | 0.009083597  | 0.808491  |
| 0.5     | 0.5     | 0.450185  | #NUM!        | 0.450185  |
| 3.08853 | 1.15367 | 0.865288  | 0.319073075  | 0.560934  |
| 0       | 0       | ?         | #DIV/0!      | ?         |
| 21.5    | 27      | 0.538518  | -0.782408565 | 0.345987  |
| 24.5    | 29.5    | 0.875405  | -0.257157839 | 0.726699  |
| 118.5   | 468     | 0.722933  | -1.259386629 | 0.0992023 |
| 14.3179 | 38.7922 | 0.521429  | 0.79045941   | 0.402681  |
| 1       | 0.5     | 0.0917211 | #NUM!        | 0.308068  |
| 0.75    | 1.75    | 0.770719  | -1.584962501 | 0.409302  |
| 15      | 19.5    | 0.647779  | -1.206450877 | 0.495493  |
| 34.0996 | 21.3905 | 0.619904  | -1.111483913 | 0.876721  |
| 0.5     | 2.5     | 0.236154  | 2.321928095  | 1         |
| 16      | 9       | 0.584676  | -1.192645078 | 0.900678  |
| 3       | 0.5     | 0.499897  | -1.584962501 | 0.860525  |
| 235.983 | 239.12  | 0.92858   | 0.150492867  | 0.937184  |
| 894.5   | 930.5   | 0.802515  | -0.463974908 | 0.774753  |
| 5.59035 | 10.3193 | 0.934537  | 0.210824872  | 0.722324  |
| 12      | 13.5    | 0.614109  | -0.777607579 | 0.518756  |
| 0       | 0       | ?         | #DIV/0!      | ?         |
| 4.86749 | 1.49663 | 0.0905797 | -2.151641209 | 0.810272  |
| 288.361 | 198.708 | 0.377264  | -0.557920687 | 0.976752  |
| 35.5    | 52      | 0.697308  | -1.195550809 | 0.491418  |
| 60.3565 | 85.6184 | 0.952089  | 0.094698072  | 0.758151  |
| 190     | 216     | 0.914956  | -0.230005605 | 0.837299  |
| 7.19137 | 3.35239 | 0.714992  | -0.301383169 | 0.515451  |
| 580.5   | 411     | 0.868996  | -0.199584975 | 0.835618  |
| 2.53593 | 6.41076 | 0.860997  | 0.567434788  | 0.706831  |
| 1       | 2       | 0.834708  | 0.584962501  | 0.834708  |
| 51.5    | 40.5    | 0.818631  | -0.457681837 | 0.960622  |
| 143     | 143     | 0.733911  | -0.700439718 | 0.733911  |
| 4.19382 | 8.79474 | 0.255243  | 1.914901974  | 0.459014  |
| 0       | 0       | ?         | #DIV/0!      | ?         |
| 126.337 | 175     | 0.912305  | -0.18338111  | 0.647779  |
| 778.5   | 799     | 0.474716  | -1.199411766 | 0.4563    |
| 223.5   | 240     | 0.824573  | -0.390503092 | 0.772036  |
| 0.5     | 0.5     | 1         | 0            | 1         |
| 0       | 0       | ?         | #DIV/0!      | ?         |
| 444.335 | 371.904 | 0.725794  | -0.542200115 | 0.865207  |
| 183     | 240.5   | 0.954824  | -0.110558375 | 0.767568  |
| 1080    | 976.5   | 0.687527  | -0.653699687 | 0.765327  |
| 12      | 14      | 0.933018  | -0.125530882 | 0.801965  |
| 270.5   | 226.5   | 0.908421  | -0.166595448 | 0.954868  |
| 47.5    | 136.5   | 0.799629  | -1.440572591 | 0.351844  |
| 148     | 124.5   | 0.561209  | -1.090512293 | 0.679098  |
| 0       | 0.5     | 1         | #DIV/0!      | 0.308068  |
| 724.358 | 668.656 | 0.89355   | -0.212650515 | 0.953102  |
| 42.4987 | 41.3825 | 0.720028  | -0.580324344 | 0.740944  |
| 39      | 35.5    | 0.79003   | -0.530514717 | 0.849904  |
| 0       | 0       | ?         | #DIV/0!      | ?         |
| 7.5     | 13.5    | 0.943666  | -0.206450877 | 0.628455  |
| 14.9522 | 12.09   | 0.731167  | -0.612920575 | 0.876864  |
| 44.5    | 27      | 0.535975  | -1.049468676 | 0.878232  |
| 1694    | 1534.5  | 0.962594  | 0.083549969  | 0.903835  |

|          |          |          |              |           |
|----------|----------|----------|--------------|-----------|
| 46.5     | 26.5     | 0.3636   | -0.784271309 | 0.979862  |
| 11.4743  | 12.6255  | 0.954678 | 0.128257751  | 0.996412  |
| 1.49882  | 0.12033  | 0.948106 | -0.118082475 | 0.504365  |
| 981.5    | 1030     | 0.945202 | -0.141993662 | 0.916452  |
| 675.5    | 661      | 0.785116 | -0.480948722 | 0.800831  |
| 23       | 21.5     | 0.827239 | -0.353636955 | 0.878301  |
| 0        | 0        | ?        | #DIV/0!      | ?         |
| 1.29173  | 1.15087  | 0.343295 | #NUM!        | 0.390875  |
| 93.5     | 111      | 0.911641 | 0.2278926    | 0.99169   |
| 2        | 0.5      | 0.320255 | #NUM!        | 0.785812  |
| 6.29441  | 5.28706  | 0.888938 | 0.238354845  | 0.792699  |
| 1605.84  | 1681.94  | 0.757964 | -0.441268381 | 0.717118  |
| 22.5     | 25.5     | 0.652431 | -1.032421478 | 0.574295  |
| 484.5    | 434      | 0.830072 | -0.283728235 | 0.928572  |
| 2074.5   | 1816.5   | 0.870062 | -0.215224023 | 0.986575  |
| 2.84E-05 | 0        | 0.308068 | #NUM!        | 1         |
| 3.48043  | 8.14472  | 0.241574 | -2.609308199 | 0.0322659 |
| 45       | 44.5     | 0.838262 | -0.302028537 | 0.847588  |
| 0        | 0        | ?        | #DIV/0!      | ?         |
| 16.5     | 15.5     | 0.800892 | 0.347923303  | 0.758593  |
| 151.428  | 113.498  | 0.664092 | -0.574298129 | 0.916542  |
| 49.5     | 63.5     | 0.931496 | -0.203091865 | 0.787596  |
| 24       | 30.5     | 0.765457 | 0.64385619   | 0.876313  |
| 6.5      | 9.5      | 0.813955 | 0.547487795  | 1         |
| 3        | 4.5      | 0.914417 | 0.222392421  | 0.830364  |
| 425.364  | 326.244  | 0.55696  | -0.767601075 | 0.792916  |
| 1        | 1.5      | 0.545627 | #NUM!        | 0.3832    |
| 2        | 1.5      | 0.267367 | #NUM!        | 0.3832    |
| 29.5     | 36.5     | 0.858563 | -0.390789953 | 0.723899  |
| 297.5    | 298      | 0.831826 | -0.364996817 | 0.830591  |
| 560      | 561.5    | 0.772613 | -0.489038081 | 0.770587  |
| 741      | 622      | 0.548265 | -0.87333384  | 0.692284  |
| 10       | 9        | 0.690214 | -0.621488377 | 0.774277  |
| 0        | 1        | 0.622002 | #DIV/0!      | 0.622002  |
| 0        | 0        | ?        | #DIV/0!      | ?         |
| 0.5      | 0        | 0.308068 | #NUM!        | 1         |
| 10.5     | 25.5     | 0.967286 | 0.131244533  | 0.577261  |
| 0        | 0        | ?        | #DIV/0!      | ?         |
| 34.0979  | 27.9389  | 0.97949  | -0.045805464 | 0.902336  |
| 117.343  | 98.6686  | 0.807433 | -0.386072962 | 0.937089  |
| 17.5     | 10.5     | 0.941071 | 0.080170349  | 0.56643   |
| 8.5      | 2        | 0.852323 | -0.180572246 | 0.34614   |
| 1.27289  | 2.92E-20 | 0.516935 | -1.45938515  | 0.703696  |
| 31.5     | 28.5     | 0.664628 | -0.584962501 | 0.754766  |
| 0        | 2.5      | 0.825659 | #DIV/0!      | 0.407544  |
| 4.5      | 7.5      | 0.691772 | -1.584962501 | 0.446614  |
| 317.16   | 268.456  | 0.522549 | -0.990524211 | 0.652265  |
| 5        | 4.5      | 0.670897 | -0.736965594 | 0.748162  |
| 38.6241  | 125.181  | 0.780453 | 0.929771184  | 0.68327   |
| 59.9102  | 68.5965  | 0.805154 | -0.519954627 | 0.717036  |
| 303.643  | 412.169  | 0.880127 | 0.224272027  | 0.865347  |
| 41       | 33       | 0.817166 | -0.403355694 | 0.96294   |
| 607      | 656      | 0.873845 | -0.3045051   | 0.821526  |
| 55       | 48.5     | 0.488516 | -1.226770862 | 0.57632   |
| 1.51E-09 | 0        | 0.308068 | 27.57267599  | 0.308068  |
| 0        | 0        | ?        | #DIV/0!      | ?         |



|         |         |           |              |          |
|---------|---------|-----------|--------------|----------|
| 440.5   | 401     | 0.89931   | -0.239966389 | 0.958087 |
| 3.44263 | 7.68499 | 0.967196  | 0.083214889  | 0.442766 |
| 486.125 | 494.416 | 0.755519  | -0.579121946 | 0.743579 |
| 1208    | 1184    | 0.673488  | -0.562447706 | 0.691945 |
| 54      | 70.5    | 0.96705   | -0.096676019 | 0.814326 |
| 100     | 92      | 0.93415   | -0.120294234 | 1        |
| 116.5   | 75.5    | 0.88865   | -0.149940627 | 0.722201 |
| 479     | 484     | 0.906141  | -0.203442128 | 0.898753 |
| 408     | 396.5   | 0.872123  | -0.265157578 | 0.89337  |
| 548     | 636.5   | 0.947529  | -0.127926192 | 0.848933 |
| 0       | 0       | ?         | #DIV/0!      | ?        |
| 56.5706 | 30.0281 | 0.433037  | -0.805787367 | 0.936128 |
| 426     | 415     | 0.859496  | -0.256951354 | 0.881452 |
| 0       | 0       | ?         | #DIV/0!      | ?        |
| 0       | 0       | ?         | #DIV/0!      | ?        |
| 129.5   | 131.5   | 0.720493  | -0.797639767 | 0.711022 |
| 1       | 0.5     | 0.353387  | #NUM!        | 0.622002 |
| 625.5   | 596     | 0.81218   | -0.433997691 | 0.845533 |
| 13.7263 | 37.1191 | 0.927841  | 0.26559318   | 0.517672 |
| 361.5   | 327     | 0.552213  | -0.96995264  | 0.628326 |
| 0.5     | 1       | 0.622002  | #NUM!        | 0.353387 |
| 232.5   | 223.5   | 0.894304  | -0.153727774 | 0.934597 |
| 11.7369 | 32.025  | 0.976871  | -0.117684287 | 0.520414 |
| 248.5   | 212.5   | 0.827682  | -0.295323944 | 0.962094 |
| 117.957 | 141.335 | 0.957241  | -0.113152204 | 0.846302 |
| 0       | 0       | ?         | #DIV/0!      | ?        |
| 0       | 0       | ?         | #DIV/0!      | ?        |
| 1       | 0.5     | 0.0917211 | #NUM!        | 0.308068 |
| 0       | 0.42665 | 1         | #DIV/0!      | 0.308068 |
| 1       | 0.5     | 0.353387  | #NUM!        | 0.622002 |
| 10.5    | 17.5    | 0.753004  | -0.807354922 | 0.443121 |
| 256.5   | 227     | 0.601616  | -0.873531999 | 0.693361 |
| 0.00065 | 1.35289 | 0.368528  | 11.79646805  | 0.692213 |
| 12.5    | 6       | 0.703202  | -0.556393349 | 0.810231 |
| 1.5     | 2       | 0.273765  | 1.415037499  | 0.363426 |
| 3       | 0.5     | 0.0877066 | -2.584962501 | 1        |
| 0.03394 | 8.15705 | 0.330956  | 8.101072065  | 0.894087 |
| 38      | 66      | 0.790831  | 0.559427409  | 0.882316 |
| 219.891 | 119.232 | 0.622119  | 0.595311287  | 0.375498 |
| 921.923 | 850.526 | 0.772082  | -0.409010208 | 0.841776 |
| 662.5   | 658     | 0.814774  | -0.353576466 | 0.820406 |
| 410.5   | 392.5   | 0.920659  | -0.191390451 | 0.948585 |
| 10.5    | 14.5    | 0.793118  | 0.561878888  | 0.957904 |
| 117.5   | 95      | 0.806489  | -0.450252192 | 0.94391  |
| 59.3114 | 42.651  | 0.855396  | -0.291312594 | 0.92197  |
| 114.819 | 91.1076 | 0.703912  | -0.492677907 | 0.912301 |
| 6       | 8.5     | 1         | 0            | 0.683094 |
| 815.5   | 830     | 0.683925  | -0.557798901 | 0.66797  |
| 10      | 18.5    | 0.899609  | -0.415037499 | 0.588811 |
| 235.5   | 199     | 0.729166  | -0.487265827 | 0.872528 |
| 531     | 589.5   | 0.79945   | -0.478920863 | 0.725467 |
| 25      | 21.5    | 0.85703   | -0.286304185 | 0.967972 |
| 410.224 | 432.815 | 0.75104   | -0.577830409 | 0.712161 |
| 0.02054 | 24.9194 | 0.942797  | 6.111969306  | 0.282037 |
| 141     | 115     | 0.741135  | -0.680119734 | 0.865333 |
| 542.351 | 761.088 | 0.845159  | 0.437136865  | 0.978176 |

|          |          |          |              |           |
|----------|----------|----------|--------------|-----------|
| 34.2145  | 33.6569  | 0.489522 | -1.994301125 | 0.498228  |
| 123.613  | 86.0241  | 0.315257 | -0.638352489 | 0.8687    |
| 162.314  | 128.562  | 0.470533 | -0.738683539 | 0.718449  |
| 6        | 7.5      | 0.14491  | -1.584962501 | 0.0741345 |
| 536.868  | 641.922  | 0.797946 | -0.352125426 | 0.631453  |
| 207.752  | 272.209  | 0.874262 | -0.366538752 | 0.709155  |
| 6        | 12       | 0.528557 | 1.415037499  | 0.794697  |
| 534.482  | 522.435  | 0.808982 | -0.395734486 | 0.82646   |
| 11.5     | 14.5     | 0.979094 | -0.064130337 | 0.854909  |
| 127      | 123      | 0.978245 | 0.050234303  | 0.958929  |
| 54.0663  | 71.4545  | 0.921192 | -0.17231752  | 0.706354  |
| 18       | 5        | 0.85427  | -0.169925001 | 0.351683  |
| 527.029  | 467.214  | 0.641759 | -0.774272967 | 0.732831  |
| 307.807  | 255.828  | 0.81573  | -0.411294312 | 0.940424  |
| 51.4145  | 46.5849  | 0.714521 | -0.533559953 | 0.79771   |
| 0.5      | 1        | 0.622002 | #NUM!        | 0.353387  |
| 581      | 576      | 0.855234 | -0.332207516 | 0.861193  |
| 0        | 0        | ?        | #DIV/0!      | ?         |
| 0.5      | 0        | 0.622002 | 1            | 0.353387  |
| 334.5    | 300.5    | 0.963621 | -0.084366206 | 0.971274  |
| 35       | 42       | 0.419618 | -0.771731012 | 0.260485  |
| 3456.5   | 3133     | 0.479607 | -0.74037828  | 0.580629  |
| 93.5     | 78       | 0.677327 | -0.581110175 | 0.833171  |
| 8.58849  | 13.3935  | 0.758765 | 0.732832409  | 0.961763  |
| 14       | 12.5     | 0.395629 | -1.485426827 | 0.470312  |
| 5.97638  | 1.88069  | 0.425779 | 1.469382819  | 0.292     |
| 477.5    | 444      | 0.651531 | -0.548417741 | 0.723264  |
| 50       | 23.5     | 0.315103 | -1.836501268 | 0.771625  |
| 137.348  | 134.913  | 0.62869  | -0.954692773 | 0.640798  |
| 122.652  | 211.087  | 0.908093 | -0.329100439 | 0.609185  |
| 0.5      | 0        | 0.495025 | 1.584962501  | 0.329316  |
| 11.7532  | 12.9936  | 0.907794 | -0.261609747 | 0.849997  |
| 0        | 0        | ?        | #DIV/0!      | ?         |
| 2.4437   | 1.28E-06 | 0.272062 | -1.824254655 | 0.633954  |
| 0        | 0        | ?        | #DIV/0!      | ?         |
| 7        | 8        | 0.963891 | 0.099535674  | 0.963891  |
| 459      | 423.5    | 0.699287 | -0.623181823 | 0.762063  |
| 4.88206  | 4.85882  | 0.686069 | -0.7244979   | 0.68955   |
| 7        | 3        | 0.573338 | -0.807354922 | 0.847091  |
| 6.5      | 5.5      | 0.951645 | -0.115477217 | 0.951645  |
| 86.5     | 86.5     | 0.886577 | -0.244803669 | 0.886577  |
| 30.4456  | 17.6063  | 0.857387 | -0.145821427 | 0.554961  |
| 0.0625   | 0.125    | 0.622002 | #NUM!        | 0.353387  |
| 2.75E-07 | 11.6977  | 0.881541 | 22.43704896  | 0.370078  |
| 0        | 0.5      | 1        | #DIV/0!      | 0.308068  |
| 0.0625   | 0.125    | 0.622002 | #NUM!        | 0.353387  |
| 0.0625   | 0.125    | 0.622002 | #NUM!        | 0.353387  |
| 0        | 0.5      | 1        | #DIV/0!      | 0.308068  |
| 0        | 0.5      | 1        | #DIV/0!      | 0.308068  |
| 0.0625   | 0.125    | 0.622002 | #NUM!        | 0.353387  |
| 0.0625   | 0.125    | 0.622002 | #NUM!        | 0.353387  |
| 0.0625   | 0.125    | 0.622002 | #NUM!        | 0.353387  |
| 0.0625   | 0.125    | 0.622002 | #NUM!        | 0.353387  |
| 0.0625   | 0.125    | 0.622002 | #NUM!        | 0.353387  |
| 39       | 40       | 0.475134 | -1.037474705 | 0.455422  |
| 9.5      | 9        | 0.869427 | 0.275634443  | 0.837425  |

|          |          |          |              |           |
|----------|----------|----------|--------------|-----------|
| 2        | 2        | 1        | 0            | 1         |
| 0        | 0        | ?        | #DIV/0!      | ?         |
| 681.308  | 479.379  | 0.681646 | -0.579055037 | 0.965594  |
| 24       | 13.5     | 0.399431 | -1.337034987 | 0.804462  |
| 16       | 16       | 0.775196 | -0.476438044 | 0.775196  |
| 0        | 0        | ?        | #DIV/0!      | ?         |
| 6        | 5.5      | 1        | 0            | 0.955518  |
| 2.5      | 1.5      | 0.370757 | #NUM!        | 0.573338  |
| 62.2619  | 97.5709  | 0.871636 | 0.393274966  | 0.895821  |
| 37.3909  | 27.6798  | 0.634145 | -0.491949922 | 0.960783  |
| 0.141    | 0        | 0.308068 | #NUM!        | 1         |
| 0.69656  | 2.53671  | 0.568981 | 1.919803614  | 0.976095  |
| 62.5     | 75       | 0.932576 | -0.158429363 | 0.805645  |
| 0        | 1        | 0.450185 | #DIV/0!      | 1         |
| 2        | 8.5      | 0.815183 | 1            | 0.606286  |
| 70.5     | 47.5     | 0.869453 | 0.226770862  | 0.637983  |
| 0        | 0        | ?        | #DIV/0!      | ?         |
| 1235.5   | 1031.5   | 0.906443 | 0.224975732  | 0.816821  |
| 1        | 0        | 0.308068 | #NUM!        | 1         |
| 162.756  | 155.874  | 0.870529 | -0.285536018 | 0.900735  |
| 218.5    | 189.5    | 0.635728 | -1.064130337 | 0.721467  |
| 38.3469  | 32.4924  | 0.847219 | -0.305878712 | 0.969023  |
| 317      | 303.5    | 0.945357 | -0.130919492 | 0.972156  |
| 1.5      | 1        | 0.559404 | -1.584962501 | 0.764931  |
| 112.5    | 111.5    | 0.912129 | -0.177156571 | 0.91885   |
| 36       | 46.5     | 0.783644 | -0.584962501 | 0.612875  |
| 29.5     | 29.5     | 0.817575 | -0.423211431 | 0.817575  |
| 20.5     | 20       | 0.947463 | 0.101879614  | 0.930012  |
| 580      | 607.501  | 0.837626 | -0.339131166 | 0.801957  |
| 0        | 0        | ?        | #DIV/0!      | ?         |
| 19.4504  | 30.4187  | 0.975332 | 0.071898842  | 0.75841   |
| 32       | 35.5     | 0.648854 | -0.642447995 | 0.557758  |
| 215      | 206.5    | 0.933878 | -0.166992268 | 0.957749  |
| 154.5    | 145      | 0.91848  | -0.210767096 | 0.955272  |
| 178.5    | 235      | 0.974969 | -0.057715498 | 0.777559  |
| 1        | 0        | 0.308068 | #NUM!        | 1         |
| 8        | 13.5     | 0.734617 | -1.192645078 | 0.469041  |
| 53.869   | 27.7842  | 0.364567 | -3.905411674 | 0.643371  |
| 280.5    | 355.5    | 0.961353 | -0.101189824 | 0.811502  |
| 11.8559  | 13.7394  | 0.695935 | -0.692000893 | 0.58502   |
| 521      | 521.5    | 0.86203  | -0.333396043 | 0.861399  |
| 0        | 0        | 0.308068 | #DIV/0!      | 0.308068  |
| 0.1      | 0.32     | 0.409442 | -56.51942595 | 0.0549771 |
| 1.16E-08 | 0        | 0.308068 | 28.14427725  | 0.308068  |
| 9.29E-37 | 1.57E-28 | 0.308068 | 107.8839594  | 0.308068  |
| 3.35E-12 | 1.71E-17 | 0.308068 | 35.97321278  | 0.308068  |
| 202      | 184.5    | 0.822001 | -0.424591806 | 0.88161   |
| 0        | 0        | ?        | #DIV/0!      | ?         |
| 5.31E-25 | 0        | ?        | -21.78980966 | ?         |
| 1.27295  | 0        | 0.308068 | -61.14769655 | 1         |
| 0.5      | 0        | 0.308068 | #NUM!        | 1         |
| 26       | 16       | 0.42916  | -2           | 0.68702   |
| 1.60E-17 | 6.89E-14 | ?        | 10.66105741  | ?         |
| 309.39   | 270.654  | 0.764999 | -0.499167794 | 0.863481  |
| 99.5883  | 114.629  | 0.887574 | -0.263876902 | 0.788861  |
| 0.58333  | 0.75     | 0.113502 | -2.807354675 | 0.0598224 |

|         |          |          |              |           |
|---------|----------|----------|--------------|-----------|
| 69.2555 | 44.6516  | 0.712766 | -0.422702285 | 0.882009  |
| 6       | 4        | 0.236154 | -1.584962501 | 0.513713  |
| 0       | 0        | ?        | #DIV/0!      | ?         |
| 25.433  | 36.9373  | 0.681498 | -1.0175436   | 0.45428   |
| 192.5   | 184.5    | 0.851264 | -0.307943865 | 0.883011  |
| 123     | 160      | 0.892158 | -0.291462814 | 0.722698  |
| 175.402 | 178.722  | 0.989892 | 0.023180222  | 0.998295  |
| 386.5   | 385      | 0.884597 | -0.256702702 | 0.887316  |
| 0.5     | 3.5      | 0.878232 | 1            | 0.465798  |
| 396.5   | 357.5    | 0.934347 | -0.139323959 | 0.995495  |
| 20.5    | 7        | 0.613868 | 0.686842115  | 0.327453  |
| 6.5     | 6        | 0.564258 | -1.378511623 | 0.611386  |
| 100     | 96       | 0.881851 | -0.242976753 | 0.912113  |
| 477.5   | 539.5    | 0.736381 | -0.555061015 | 0.63928   |
| 928.106 | 1050.34  | 0.882095 | -0.287783415 | 0.798508  |
| 60.5    | 39       | 0.400206 | -2.060882242 | 0.638452  |
| 94      | 79       | 0.860162 | -0.316184112 | 0.973336  |
| 151.386 | 94.6788  | 0.964013 | -0.049913548 | 0.657427  |
| 7       | 12       | 0.777429 | -1           | 0.507291  |
| 505     | 499.5    | 0.766314 | -0.452662572 | 0.775362  |
| 1.5     | 2.5      | 0.855216 | -0.584962501 | 0.593125  |
| 237.509 | 189.253  | 0.651838 | -0.826836997 | 0.806916  |
| 28.9638 | 25.1523  | 0.871322 | -0.275454612 | 0.968545  |
| 33.5    | 28.5     | 0.627745 | -1.208108195 | 0.718162  |
| 1205    | 1609     | 0.195116 | -1.266150638 | 0.0792997 |
| 21.3775 | 6.04562  | 0.433077 | -1.04388595  | 0.746362  |
| 3.5     | 3.5      | 0.513713 | -2.807354922 | 0.513713  |
| 61      | 80       | 0.975164 | 0.069262662  | 0.868456  |
| 512.514 | 501.734  | 0.696783 | -0.592803668 | 0.714387  |
| 80.8953 | 99.9111  | 0.872257 | 0.214889501  | 0.940471  |
| 4.5     | 5        | 0.338084 | -1.169925001 | 0.265726  |
| 950.559 | 1034.79  | 0.255924 | -0.925821248 | 0.195039  |
| 17.1356 | 25.5311  | 0.645676 | -0.5862428   | 0.297894  |
| 2       | 3.5      | 0.873517 | -0.415037499 | 0.538238  |
| 27.3853 | 21.7188  | 0.514799 | -1.074890062 | 0.685579  |
| 6.8002  | 4.32E-07 | 0.379597 | -2.726101844 | 0.866452  |
| 171.5   | 137.5    | 0.814062 | -0.405256478 | 0.964087  |
| 10.1643 | 10.1317  | 0.919881 | -0.141957435 | 0.922605  |
| 372.114 | 334.57   | 0.988355 | -0.021317522 | 0.931662  |
| 0.01404 | 5.29578  | 0.997636 | -6.658310621 | 0.30808   |
| 4.5     | 5        | 0.946355 | 0.152003093  | 1         |
| 23.5    | 33       | 0.699234 | -0.46712601  | 0.371992  |
| 38.5    | 39       | 0.834512 | -0.336049203 | 0.824424  |
| 543     | 483.5    | 0.796513 | -0.405328288 | 0.886188  |
| 0.5     | 0.5      | 0.651448 | 1            | 0.651448  |
| 1845.5  | 1711.5   | 0.641266 | -0.735402967 | 0.701141  |
| 1044.5  | 1023.5   | 0.686882 | -0.579448132 | 0.704489  |
| 74.5499 | 63.0534  | 0.949472 | 0.100933119  | 0.843388  |
| 1.5     | 1        | 0.622002 | -0.584962501 | 1         |
| 16.9285 | 8.36312  | 0.850881 | -0.263216794 | 0.7051    |
| 0       | 1.5      | 0.724378 | #DIV/0!      | 0.495025  |
| 1       | 2        | 0.834708 | 0.584962501  | 0.834708  |
| 130     | 158.5    | 0.60806  | -1.164386818 | 0.483793  |
| 144.246 | 166.563  | 0.628599 | -0.826577781 | 0.519629  |
| 8.5     | 12.5     | 0.902586 | -0.180572246 | 0.553498  |
| 700.5   | 657.5    | 0.826815 | -0.335897279 | 0.87723   |

|          |          |          |              |          |
|----------|----------|----------|--------------|----------|
| 1.5      | 0.5      | 0.513713 | -1.584962501 | 1        |
| 812      | 898      | 0.833243 | -0.280552167 | 0.73796  |
| 16.5     | 22       | 0.829511 | -0.40053793  | 0.616058 |
| 351.732  | 308.427  | 0.639268 | -0.49522863  | 0.784177 |
| 80.5312  | 89.5551  | 0.336864 | -1.083301657 | 0.260738 |
| 1.91021  | 2.85489  | 0.638914 | 0.888309502  | 0.841507 |
| 0        | 0        | ?        | #DIV/0!      | ?        |
| 1189     | 1308     | 0.843214 | -0.410595328 | 0.782001 |
| 3.5      | 5.5      | 0.798692 | 0.514573173  | 0.931878 |
| 0.5      | 0        | 0.308068 | #NUM!        | 1        |
| 0.5      | 0.5      | 1        | 0            | 1        |
| 124.347  | 121.063  | 0.906979 | -0.192348424 | 0.92656  |
| 0        | 0.5      | 0.450185 | #DIV/0!      | 1        |
| 9        | 11       | 0.748451 | 0.688055994  | 0.837371 |
| 40       | 43.5     | 0.76325  | 0.277984747  | 0.858577 |
| 141.023  | 155.088  | 0.95207  | 0.109658675  | 0.987388 |
| 16.5     | 9.5      | 0.338594 | -3.044394119 | 0.598191 |
| 492.5    | 555      | 0.740189 | -0.707965722 | 0.662317 |
| 29.3027  | 22.8876  | 0.585612 | -0.719569778 | 0.80505  |
| 42.0895  | 55.6613  | 0.684905 | -0.679972779 | 0.466787 |
| 1160.5   | 995.5    | 0.548215 | -0.604046461 | 0.719733 |
| 236.967  | 294.85   | 0.553365 | -0.609033914 | 0.337981 |
| 706.5    | 745      | 0.808878 | -0.482978468 | 0.7737   |
| 12.3752  | 11.3115  | 0.998927 | -0.002812306 | 0.953816 |
| 491      | 430.5    | 0.811912 | -0.315697724 | 0.928934 |
| 93.8846  | 80.4536  | 0.87468  | 0.231857477  | 0.775198 |
| 865.115  | 724.546  | 0.720044 | -0.439907716 | 0.890036 |
| 2.08491  | 1.98137  | 0.590079 | -1.065709522 | 0.62423  |
| 0.5      | 0.5      | 0.415333 | 2.321928095  | 0.415333 |
| 272      | 254      | 0.781969 | -0.506262259 | 0.829385 |
| 6.17952  | 5.89954  | 0.500637 | -2.294048146 | 0.523447 |
| 0.03394  | 0.01697  | 0.337662 | 3.880661355  | 0.323123 |
| 352.5    | 347.5    | 0.863017 | -0.274127374 | 0.874092 |
| 1095.5   | 919.5    | 0.585561 | -0.808507695 | 0.72863  |
| 3        | 2.5      | 1        | 0            | 0.866773 |
| 17.5     | 10.5     | 0.507776 | -1.222392421 | 0.836459 |
| 7        | 6        | 0.648139 | -1.222392421 | 0.729943 |
| 0.01509  | 0.03392  | 0.299719 | 6.537505567  | 0.30516  |
| 40.5     | 104      | 0.80687  | -1.169925001 | 0.382816 |
| 43.5     | 33.5     | 0.912401 | 0.186413124  | 0.770799 |
| 7.78E-13 | 2.14E-07 | 0.996529 | 10.05459524  | 0.309617 |
| 39.5     | 41       | 0.89952  | -0.174497731 | 0.866458 |
| 2030.5   | 270.311  | 0.330736 | 0.916503465  | 0.106079 |
| 3        | 1        | 0.764931 | -0.584962501 | 0.764931 |
| 22.9475  | 21.737   | 0.795918 | -0.522936541 | 0.8304   |
| 12.5     | 14       | 0.834294 | 0.443606651  | 0.888828 |
| 635.805  | 675.946  | 0.897456 | -0.199435546 | 0.84811  |
| 22.75    | 28.75    | 0.79101  | -0.649813645 | 0.651352 |
| 3.88529  | 2.97E-10 | 0.119771 | -79.70644517 | 1        |
| 222.43   | 209.95   | 0.780637 | -0.536589073 | 0.819078 |
| 713.997  | 819.999  | 0.71947  | -0.560905003 | 0.604645 |
| 6031     | 5155     | 0.556611 | -0.550453405 | 0.744341 |
| 3.56354  | 1.96007  | 0.982397 | -0.032057252 | 0.672677 |
| 725.328  | 552.149  | 0.597101 | -1.054241246 | 0.771399 |
| 0        | 0        | ?        | #DIV/0!      | ?        |
| 0.5      | 0.5      | 0.651448 | 1            | 0.651448 |

|          |          |           |              |            |
|----------|----------|-----------|--------------|------------|
| 0        | 0        | ?         | #DIV/0!      | ?          |
| 0        | 0        | ?         | #DIV/0!      | ?          |
| 0        | 1.43134  | 1         | #DIV/0!      | 0.0540204  |
| 1        | 0        | 0.308068  | #NUM!        | 1          |
| 0        | 0        | ?         | #DIV/0!      | ?          |
| 6.34E-17 | 2.07E-22 | ?         | #NUM!        | ?          |
| 6.53E-17 | 1.16886  | 1         | #NUM!        | 0.00344578 |
| 6.53E-17 | 1.16886  | 1         | #NUM!        | 0.00344578 |
| 6.53E-17 | 0.5      | 1         | #NUM!        | 0.308068   |
| 6.34E-17 | 0        | ?         | #NUM!        | ?          |
| 6.34E-17 | 0        | ?         | #NUM!        | ?          |
| 6.34E-17 | 0        | ?         | #NUM!        | ?          |
| 6.34E-17 | 0        | ?         | #NUM!        | ?          |
| 0.5      | 0        | 0.308068  | #NUM!        | 1          |
| 1.45554  | 8.45E-09 | 0.849057  | -0.34951186  | 0.504501   |
| 4.99488  | 1.87381  | 0.0857501 | -3.320450018 | 0.496385   |
| 0        | 0        | 0.308068  | #DIV/0!      | 0.308068   |
| 0        | 0        | 0.308068  | #DIV/0!      | 0.308068   |
| 0        | 0        | ?         | #DIV/0!      | ?          |
| 0        | 0        | ?         | #DIV/0!      | ?          |
| 13.471   | 19.4966  | 0.307744  | -4.043315259 | 0.16809    |
| 88.1845  | 72.102   | 0.369763  | -0.838630217 | 0.580775   |
| 7024.01  | 7759.45  | 0.682437  | -0.545451401 | 0.590029   |
| 751.223  | 668.247  | 0.502772  | -1.302306347 | 0.580083   |
| 1568     | 1356     | 0.663055  | -0.715352921 | 0.773382   |
| 0.5      | 2        | 1         | 0            | 0.450185   |
| 0        | 0        | ?         | #DIV/0!      | ?          |
| 5.5      | 4.5      | 0.905448  | -0.137503524 | 0.905448   |
| 0        | 0        | ?         | #DIV/0!      | ?          |
| 0        | 0        | ?         | #DIV/0!      | ?          |
| 0        | 0        | ?         | #DIV/0!      | ?          |
| 0        | 0        | ?         | #DIV/0!      | ?          |
| 0        | 0        | ?         | #DIV/0!      | ?          |
| 0        | 0        | ?         | #DIV/0!      | ?          |
| 28.9559  | 28.2447  | 0.343152  | -0.684226304 | 0.370804   |
| 0        | 0        | ?         | #DIV/0!      | ?          |
| 0        | 0        | ?         | #DIV/0!      | ?          |
| 0        | 0        | ?         | #DIV/0!      | ?          |
| 0.00228  | 3.05E-24 | 0.308068  | #NUM!        | 1          |
| 1        | 1        | 0.710482  | -1           | 0.710482   |
| 0.00019  | 2.59E-25 | 0.308051  | #NUM!        | 1          |
| 1        | 0.5      | 0.651448  | -1           | 1          |
| 0.00228  | 3.05E-24 | 0.308068  | #NUM!        | 1          |
| 768.5    | 793      | 0.895219  | -0.269619918 | 0.875852   |
| 0.00103  | 0.07359  | 0.987446  | -41.01948272 | 0.308107   |
| 1.67E-05 | 0        | 0.308068  | -66.0576044  | 1          |
| 1.45563  | 5.62E-19 | 0.0153797 | -106.693186  | 1          |
| 1.01852  | 0.07359  | 0.988322  | -0.02647431  | 0.484871   |
| 1.40959  | 0        | 0.259922  | -82.4225687  | 1          |
| 0.50136  | 0        | 0.308068  | -76.53641105 | 1          |
| 0.04273  | 0        | 0.307755  | -76.53697375 | 1          |
| 0.0818   | 0        | 0.308068  | -78.31559067 | 1          |
| 2.00E-05 | 0.07359  | 0.999755  | -35.34078946 | 0.308068   |
| 0.00103  | 0.07359  | 0.987446  | -41.01948272 | 0.308107   |
| 0.04271  | 0        | 0.308068  | -26.91411949 | 1          |
| 1.05E-18 | 4.01E-32 | ?         | 8.778439918  | ?          |
| 1.05E-18 | 4.01E-32 | ?         | 8.778439918  | ?          |

|          |          |          |              |          |
|----------|----------|----------|--------------|----------|
| 4.70E-13 | 0        | ?        | -40.97449874 | ?        |
| 9.84E-05 | 4.95E-30 | 0.308068 | -37.63724454 | 1        |
| 0.5      | 2        | 0.622002 | #NUM!        | 0.116158 |
| 0.0818   | 0        | 0.308068 | -78.31559067 | 1        |
| 0.04273  | 1.78E-24 | 0.307755 | -26.91468344 | 1        |
| 5.72E-43 | 4.01E-32 | ?        | #NUM!        | ?        |
| 0.0818   | 0        | 0.308068 | #NUM!        | 1        |
| 1.77E-12 | 4.01E-32 | ?        | -11.91084919 | ?        |
| 2.5      | 1        | 0.806588 | -0.321928095 | 0.630057 |
| 0.0818   | 0        | 0.308068 | #NUM!        | 1        |
| 0.0818   | 0        | 0.308068 | -78.31559067 | 1        |
| 0.04271  | 0        | 0.308068 | -26.91411949 | 1        |
| 6.20E-32 | 4.60E-10 | 1        | #NUM!        | 0.308068 |
| 5.72E-43 | 2.59E-25 | ?        | #NUM!        | ?        |
| 346.5    | 289      | 0.866606 | -0.271804615 | 0.995483 |
| 6.20E-32 | 4.60E-10 | 1        | 21.7424449   | 0.308068 |
| 0        | 0        | ?        | #DIV/0!      | ?        |
| 3.5      | 7        | 0.648511 | -0.807354922 | 0.191098 |
| 5.72E-43 | 0        | ?        | #NUM!        | ?        |
| 0.57268  | 2.59E-25 | 0.308068 | #NUM!        | 1        |
| 0        | 4.01E-32 | ?        | #DIV/0!      | ?        |
| 0        | 0.5      | 1        | #DIV/0!      | 0.308068 |
| 9.69E-10 | 0        | 0.308068 | -21.00470692 | 1        |
| 0        | 0.5      | 1        | #DIV/0!      | 0.308068 |
| 1.92E-08 | 0        | 0.308068 | -55.44791299 | 1        |
| 3.13E-11 | 0.07359  | 1        | #NUM!        | 0.308068 |
| 6.20E-32 | 0.5      | 1        | 21.7424449   | 0.308068 |
| 0        | 0.5      | 1        | #DIV/0!      | 0.308068 |
| 1.49313  | 1.01753  | 0.386942 | -8.839876223 | 0.541151 |
| 2.5      | 0.5      | 0.554284 | -1.303123029 | 0.833541 |
| 0        | 0.4976   | 1        | #DIV/0!      | 0.308068 |
| 1.69509  | 2.5      | 0.482162 | -31.9301272  | 0.323052 |
| 1.64968  | 0        | 0.699698 | -0.480943961 | 0.361788 |
| 2.30491  | 0.98247  | 0.600704 | -1.180078686 | 0.988429 |
| 0        | 0.0024   | 1        | #DIV/0!      | 0.308068 |
| 725.5    | 758.5    | 0.9084   | -0.218586054 | 0.879079 |
| 110.5    | 155.5    | 0.909121 | 0.267379876  | 0.909121 |
| 528.45   | 497.006  | 0.580889 | -0.74112125  | 0.635523 |
| 117.792  | 94.3334  | 0.865853 | -0.275068704 | 0.9801   |
| 309      | 342.5    | 0.700029 | -0.516575526 | 0.604422 |
| 0        | 0        | ?        | #DIV/0!      | ?        |
| 5        | 10.5     | 0.926955 | 0.263034406  | 0.684441 |
| 5.73813  | 1.13384  | 0.156504 | -36.79817532 | 0.734798 |
| 822.859  | 692.672  | 0.726102 | -0.608792324 | 0.848616 |
| 853.138  | 765.329  | 0.707465 | -0.560676653 | 0.797063 |
| 293      | 260      | 0.683038 | -0.606042219 | 0.782068 |
| 1309.5   | 1258     | 0.827277 | -0.241058178 | 0.870711 |
| 3.11E-11 | 1.16853  | 1        | 11.25714609  | 0.308068 |
| 130.5    | 140.5    | 0.685244 | -0.983511877 | 0.641364 |
| 9.60678  | 12.6487  | 0.789452 | -0.496735031 | 0.585542 |
| 3.5      | 1        | 0.234161 | -1.807354922 | 1        |
| 3.81E-06 | 4.57E-08 | 0.31075  | -7.247450413 | 0.995121 |
| 6        | 10.5     | 0.922775 | -0.263034406 | 0.603072 |
| 227.889  | 341.591  | 0.862026 | -0.465104771 | 0.631792 |
| 256.5    | 278.5    | 0.648979 | -0.837908089 | 0.589595 |
| 1080.5   | 1008     | 0.562843 | -0.603777607 | 0.638192 |

|          |          |           |              |           |
|----------|----------|-----------|--------------|-----------|
| 8.5      | 4        | 0.725977  | -0.387023123 | 0.663339  |
| 12.5     | 7        | 0.736726  | -0.64385619  | 0.939834  |
| 0        | 0        | 0.308068  | #DIV/0!      | 0.308068  |
| 96.2469  | 56.416   | 0.638564  | -0.395633728 | 0.730762  |
| 17.5     | 13.5     | 0.982089  | -0.041820176 | 0.87541   |
| 1.16572  | 0.72279  | 0.604088  | 0.701577861  | 0.421914  |
| 5.5      | 7        | 0.852433  | -0.459431619 | 0.712538  |
| 267.5    | 223.5    | 0.598331  | -1.091851527 | 0.712457  |
| 0        | 0        | ?         | #DIV/0!      | ?         |
| 8.23086  | 6.54869  | 0.509373  | -0.976325846 | 0.692027  |
| 4.94111  | 21.1161  | 0.586034  | -2.304835174 | 0.0531231 |
| 42       | 44.5     | 0.846495  | -0.347923303 | 0.805051  |
| 276.214  | 157.442  | 0.460518  | -1.292697399 | 0.832284  |
| 1.44E-20 | 1.66577  | 0.611231  | 65.7090518   | 0.638513  |
| 3        | 21       | 0.934931  | 0.584962501  | 0.401308  |
| 3.05624  | 2.73E-06 | 0.308068  | -36.00712316 | 0.999999  |
| 9.95E-08 | 1.49E-39 | 0.587756  | 1.127378346  | 0.345725  |
| 0.08012  | 2.93E-11 | 0.362282  | 3.076181919  | 0.310864  |
| 0.47141  | 1.21E-13 | 0.308068  | -29.12221279 | 1         |
| 5.14E-25 | 6.51E-16 | ?         | 5.574089553  | ?         |
| 1        | 2.5      | 0.837425  | -1           | 0.436998  |
| 3.5      | 1.5      | 0.342212  | #NUM!        | 0.662499  |
| 6.17084  | 10.2391  | 0.739208  | 0.413462633  | 0.74254   |
| 0        | 0        | ?         | #DIV/0!      | ?         |
| 7        | 8        | 0.900374  | -0.222392421 | 0.803152  |
| 15.9548  | 5.67847  | 0.0959305 | -6.440361583 | 0.464532  |
| 76.7149  | 66.8798  | 0.852737  | -0.315764004 | 0.948373  |
| 192.755  | 174.546  | 0.630205  | -0.957389453 | 0.696072  |
| 45.6391  | 77.2956  | 0.917115  | 0.216301701  | 0.734745  |
| 463.379  | 452.741  | 0.877389  | -0.226597514 | 0.896569  |
| 497      | 384      | 0.754084  | -0.340553198 | 0.979482  |
| 95.5     | 99.5     | 0.65038   | -1.117997209 | 0.626295  |
| 61       | 53.5     | 0.556784  | -1.149377624 | 0.64414   |
| 61.5     | 33.5     | 0.257918  | -2.418952549 | 0.583284  |
| 1        | 2        | 0.806588  | -1           | 0.481309  |
| 295.752  | 269.136  | 0.328453  | -1.053426005 | 0.406953  |
| 578.891  | 509.677  | 0.833615  | -0.344169319 | 0.926667  |
| 97.91    | 224.335  | 0.88093   | -0.539223577 | 0.463768  |
| 22.6853  | 26.095   | 0.979199  | 0.054379711  | 0.939487  |
| 597.557  | 421.786  | 0.496426  | -0.950582676 | 0.782807  |
| 6.92509  | 7.24662  | 0.639126  | -1.122007804 | 0.611903  |
| 1.08013  | 2.06E-12 | 0.308068  | -43.80718562 | 1         |
| 40.847   | 40.6725  | 0.821811  | -0.545066097 | 0.824169  |
| 36.4937  | 37.3743  | 0.887468  | 0.30489769   | 0.898904  |
| 1135.5   | 1119     | 0.75754   | -0.466117407 | 0.769726  |
| 2039.5   | 2127.5   | 0.814784  | -0.404816825 | 0.783297  |
| 45.5249  | 34.1826  | 0.257051  | -1.285006937 | 0.479109  |
| 6        | 10.5     | 0.633066  | 1.222392421  | 0.83167   |
| 2.68894  | 1.10669  | 0.800231  | 0.484351068  | 0.543117  |
| 4.5      | 4        | 0.47679   | 0.91753784   | 0.428902  |
| 20.6871  | 0.00507  | 0.421483  | -2.159077208 | 0.8063    |
| 3.48E-34 | 2.26E-20 | ?         | 9.31855129   | ?         |
| 0        | 0.5      | 1         | #DIV/0!      | 0.308068  |
| 92.183   | 152.525  | 0.870205  | -0.422608094 | 0.569883  |
| 114.69   | 88.8982  | 0.451514  | -0.542034246 | 0.823387  |
| 212      | 280      | 0.752253  | -0.689001465 | 0.568784  |



|         |         |           |              |            |
|---------|---------|-----------|--------------|------------|
| 0       | 0       | ?         | #DIV/0!      | ?          |
| 20.5    | 25.5    | 0.925659  | -0.109624491 | 0.690208   |
| 1.5     | 3.5     | 0.513713  | -1.584962501 | 0.113502   |
| 0       | 0       | ?         | #DIV/0!      | ?          |
| 85      | 90      | 0.656252  | -1.199937571 | 0.624489   |
| 19095   | 18697   | 0.414924  | -0.902293882 | 0.433796   |
| 70.5    | 76.5    | 0.941975  | -0.128324097 | 0.884429   |
| 1315.5  | 1423    | 0.736852  | -0.71934384  | 0.686206   |
| 2174    | 1965    | 0.51702   | -1.04790309  | 0.593186   |
| 906.5   | 879.5   | 0.802716  | -0.474329118 | 0.823114   |
| 241.772 | 215.084 | 0.465143  | -0.808006983 | 0.579262   |
| 237     | 189     | 0.583868  | -1.113956189 | 0.728231   |
| 10.3024 | 7.26109 | 0.725674  | -0.766238453 | 0.919882   |
| 48.5    | 48.5    | 0.536142  | -1.741931847 | 0.536142   |
| 7.44322 | 9.46897 | 0.833579  | 0.356785476  | 0.994954   |
| 666.5   | 687.5   | 0.582342  | -0.602383936 | 0.550131   |
| 398     | 393.5   | 0.564524  | -0.673728615 | 0.575692   |
| 1125    | 1129    | 0.61972   | -0.448333603 | 0.615282   |
| 287.5   | 240.5   | 0.572574  | -1.012600037 | 0.698315   |
| 3.8852  | 1.70521 | 0.222233  | -2.531966774 | 0.655326   |
| 1673.61 | 1259.89 | 0.4266    | -1.799448575 | 0.591277   |
| 782.892 | 645.597 | 0.425693  | -2.022449243 | 0.531337   |
| 154.171 | 155.166 | 0.862457  | -0.34813004  | 0.858383   |
| 462.793 | 464.605 | 0.869973  | -0.306854382 | 0.867353   |
| 0       | 0       | ?         | #DIV/0!      | ?          |
| 0       | 0.5     | 0.353387  | #DIV/0!      | 0.622002   |
| 62.2446 | 19.1897 | 0.367881  | -0.512562077 | 0.25904    |
| 1       | 0       | 0.308068  | #NUM!        | 1          |
| 0       | 0       | ?         | #DIV/0!      | ?          |
| 3.30564 | 3.77668 | 0.478891  | -94.74703838 | 0.424712   |
| 61.8644 | 53.9689 | 0.37989   | -0.838904591 | 0.518275   |
| 7       | 11.5    | 0.39572   | 1.237039197  | 0.638785   |
| 14.5    | 22.5    | 0.751131  | 0.633872101  | 1          |
| 133.154 | 95.537  | 0.88085   | -0.207227857 | 0.867761   |
| 152.166 | 232.775 | 0.963805  | -0.07949708  | 0.629097   |
| 16.609  | 10.9558 | 0.77078   | -0.398953737 | 0.904539   |
| 18.1415 | 21.9654 | 0.811969  | 0.52160744   | 0.90191    |
| 7.26519 | 5.13831 | 0.776561  | -0.587839761 | 0.971432   |
| 12.2488 | 13.3853 | 0.989999  | 0.018967322  | 0.939947   |
| 0.78362 | 4.11753 | 0.69203   | 1.6896411    | 0.717402   |
| 151.564 | 139.528 | 0.866608  | -0.311072486 | 0.920844   |
| 61.9193 | 89.6519 | 0.07364   | -3.051319103 | 0.0266126  |
| 287.834 | 560.82  | 0.761629  | -0.762837173 | 0.351965   |
| 12.8042 | 18.1352 | 0.691446  | -0.924713935 | 0.471279   |
| 0       | 0       | 0.308068  | #DIV/0!      | 0.308068   |
| 0       | 0       | ?         | #DIV/0!      | ?          |
| 0       | 0       | ?         | #DIV/0!      | ?          |
| 0       | 0       | ?         | #DIV/0!      | ?          |
| 0       | 0       | ?         | #DIV/0!      | ?          |
| 15      | 14.5    | 0.462867  | -1.099535674 | 0.48876    |
| 0       | 0       | ?         | #DIV/0!      | ?          |
| 0       | 0       | ?         | #DIV/0!      | ?          |
| 0       | 0       | ?         | #DIV/0!      | ?          |
| 52      | 31.5    | 0.0378742 | 0.547487795  | 0.00708928 |
| 4       | 2       | 0.411079  | -3           | 0.710482   |
| 0       | 0       | ?         | #DIV/0!      | ?          |

|          |          |          |              |           |
|----------|----------|----------|--------------|-----------|
| 0        | 0        | ?        | #DIV/0!      | ?         |
| 22.5     | 24       | 0.605106 | -1.099535674 | 0.563288  |
| 25       | 19.5     | 0.589345 | 0.545968369  | 0.438738  |
| 39       | 45       | 0.823178 | -0.504042505 | 0.735391  |
| 0.5      | 0.5      | 0.450185 | #NUM!        | 0.450185  |
| 3        | 2.5      | 0.680712 | 0.874469118  | 0.623838  |
| 0        | 0        | ?        | #DIV/0!      | ?         |
| 0.5      | 1        | 0.622002 | #NUM!        | 0.353387  |
| 10.5     | 9.5      | 0.709561 | -0.584962501 | 0.788896  |
| 12.5     | 24.5     | 0.408425 | -0.943416472 | 0.0637282 |
| 7.5      | 5        | 0.210179 | -1.099535674 | 0.593125  |
| 0        | 0        | ?        | #DIV/0!      | ?         |
| 1        | 2.5      | 0.855216 | 0.584962501  | 0.717686  |
| 0        | 0        | ?        | #DIV/0!      | ?         |
| 11       | 8        | 0.505748 | -0.874469118 | 0.782716  |
| 29.5     | 13.5     | 0.589988 | -0.712718048 | 0.829105  |
| 4.5      | 5.5      | 0.327652 | -2.169925001 | 0.230584  |
| 1.5      | 0        | 0.756486 | -0.584962501 | 0.545627  |
| 8        | 6.5      | 0.5705   | -1.678071905 | 0.675601  |
| 15.5     | 9        | 0.147657 | -2.36923381  | 0.42036   |
| 0        | 0        | ?        | #DIV/0!      | ?         |
| 41.5     | 28       | 0.582299 | -0.948774677 | 0.854456  |
| 0        | 0        | ?        | #DIV/0!      | ?         |
| 1242.5   | 1277.5   | 0.919464 | -0.173776357 | 0.899622  |
| 0        | 0        | ?        | #DIV/0!      | ?         |
| 0        | 0        | ?        | #DIV/0!      | ?         |
| 0        | 0        | ?        | #DIV/0!      | ?         |
| 0        | 0        | ?        | #DIV/0!      | ?         |
| 0        | 0        | ?        | #DIV/0!      | ?         |
| 0        | 0        | ?        | #DIV/0!      | ?         |
| 0        | 0        | ?        | #DIV/0!      | ?         |
| 0        | 0        | ?        | #DIV/0!      | ?         |
| 0        | 0        | ?        | #DIV/0!      | ?         |
| 0        | 0        | ?        | #DIV/0!      | ?         |
| 0        | 0        | ?        | #DIV/0!      | ?         |
| 0        | 0        | ?        | #DIV/0!      | ?         |
| 0        | 0        | ?        | #DIV/0!      | ?         |
| 0        | 0        | ?        | #DIV/0!      | ?         |
| 0        | 0        | ?        | #DIV/0!      | ?         |
| 0        | 0        | ?        | #DIV/0!      | ?         |
| 0        | 0        | ?        | #DIV/0!      | ?         |
| 0        | 0        | ?        | #DIV/0!      | ?         |
| 0        | 0        | ?        | #DIV/0!      | ?         |
| 0        | 0        | ?        | #DIV/0!      | ?         |
| 0        | 0        | ?        | #DIV/0!      | ?         |
| 0        | 0        | ?        | #DIV/0!      | ?         |
| 0        | 0        | ?        | #DIV/0!      | ?         |
| 8.40E-15 | 8.79E-16 | 0.308068 | 22.00453619  | 0.308068  |
| 0        | 0        | ?        | #DIV/0!      | ?         |
| 0        | 0        | ?        | #DIV/0!      | ?         |
| 8        | 8        | 0.58535  | -1.415037499 | 0.58535   |
| 0        | 0        | ?        | #DIV/0!      | ?         |
| 0        | 0        | ?        | #DIV/0!      | ?         |
| 0        | 0.5      | 1        | #DIV/0!      | 0.308068  |
| 0.00426  | 0.00204  | 0.360154 | -5.389923487 | 0.649253  |
| 0        | 0        | ?        | #DIV/0!      | ?         |
| 0        | 0        | ?        | #DIV/0!      | ?         |
| 0        | 0        | ?        | #DIV/0!      | ?         |
| 0        | 0        | ?        | #DIV/0!      | ?         |
| 0.25     | 0.25     | 0.450185 | #NUM!        | 0.450185  |
| 0        | 0        | ?        | #DIV/0!      | ?         |

|          |          |          |              |          |
|----------|----------|----------|--------------|----------|
| 0        | 0        | ?        | #DIV/0!      | ?        |
| 0        | 0        | ?        | #DIV/0!      | ?        |
| 0        | 0        | ?        | #DIV/0!      | ?        |
| 0        | 0        | ?        | #DIV/0!      | ?        |
| 0        | 0        | ?        | #DIV/0!      | ?        |
| 2.30789  | 2.13839  | 0.287522 | -11.83214288 | 0.317897 |
| 0        | 0        | ?        | #DIV/0!      | ?        |
| 0        | 0        | 0.308068 | #DIV/0!      | 0.308068 |
| 0        | 0        | ?        | #DIV/0!      | ?        |
| 0        | 0        | ?        | #DIV/0!      | ?        |
| 0        | 0        | ?        | #DIV/0!      | ?        |
| 0        | 0        | ?        | #DIV/0!      | ?        |
| 0        | 0        | ?        | #DIV/0!      | ?        |
| 0        | 0        | ?        | #DIV/0!      | ?        |
| 1        | 2        | 1        | 0            | 0.651448 |
| 0        | 0        | ?        | #DIV/0!      | ?        |
| 0        | 0        | ?        | #DIV/0!      | ?        |
| 0        | 0        | ?        | #DIV/0!      | ?        |
| 13.5     | 13       | 0.624292 | -0.847996907 | 0.652308 |
| 0        | 0        | ?        | #DIV/0!      | ?        |
| 0.49999  | 0        | 0.308068 | -34.25292191 | 1        |
| 0        | 0.5      | 1        | #DIV/0!      | 0.308068 |
| 0        | 0        | ?        | #DIV/0!      | ?        |
| 5.47657  | 3.25     | 0.452588 | -2.45327261  | 0.694441 |
| 0        | 0        | ?        | #DIV/0!      | ?        |
| 0        | 0        | ?        | #DIV/0!      | ?        |
| 0        | 0.25     | 1        | #DIV/0!      | 0.308068 |
| 0        | 0        | ?        | #DIV/0!      | ?        |
| 0        | 0        | ?        | #DIV/0!      | ?        |
| 0        | 0        | ?        | #DIV/0!      | ?        |
| 0        | 0        | ?        | #DIV/0!      | ?        |
| 0        | 0        | ?        | #DIV/0!      | ?        |
| 0        | 0        | ?        | #DIV/0!      | ?        |
| 0        | 0        | ?        | #DIV/0!      | ?        |
| 0        | 0        | ?        | #DIV/0!      | ?        |
| 0        | 0        | ?        | #DIV/0!      | ?        |
| 0        | 0        | ?        | #DIV/0!      | ?        |
| 0.00426  | 0.00204  | 0.360154 | -5.389923487 | 0.649253 |
| 0        | 0        | ?        | #DIV/0!      | ?        |
| 0        | 0        | ?        | #DIV/0!      | ?        |
| 0        | 0        | ?        | #DIV/0!      | ?        |
| 0        | 0        | ?        | #DIV/0!      | ?        |
| 0        | 0        | ?        | #DIV/0!      | ?        |
| 0        | 0        | ?        | #DIV/0!      | ?        |
| 0        | 0        | ?        | #DIV/0!      | ?        |
| 0        | 0        | ?        | #DIV/0!      | ?        |
| 0        | 0        | ?        | #DIV/0!      | ?        |
| 0        | 0        | ?        | #DIV/0!      | ?        |
| 0        | 0        | ?        | #DIV/0!      | ?        |
| 0        | 0        | ?        | #DIV/0!      | ?        |
| 0        | 0        | ?        | #DIV/0!      | ?        |
| 0        | 0        | ?        | #DIV/0!      | ?        |
| 0        | 0        | ?        | #DIV/0!      | ?        |
| 0        | 0        | ?        | #DIV/0!      | ?        |
| 8.58E-16 | 8.52E-23 | 0.308068 | 45.75446268  | 0.308068 |
| 0        | 0        | ?        | #DIV/0!      | ?        |
| 0        | 0        | ?        | #DIV/0!      | ?        |
| 0        | 0        | ?        | #DIV/0!      | ?        |
| 0        | 0        | ?        | #DIV/0!      | ?        |

|          |          |          |              |          |
|----------|----------|----------|--------------|----------|
| 2631     | 2124     | 0.485881 | -0.910184421 | 0.672843 |
| 0.5      | 0        | 0.999786 | 0.000484664  | 0.450116 |
| 3.58E-32 | 4.74E-16 | ?        | #NUM!        | ?        |
| 0        | 0        | ?        | #DIV/0!      | ?        |
| 4740.5   | 2277     | 0.212844 | -1.179811611 | 0.919433 |
| 2.73E-06 | 0.82143  | 0.999997 | -4.738271779 | 0.308068 |
| 0        | 0        | ?        | #DIV/0!      | ?        |
| 125.008  | 148.232  | 0.824311 | 0.374338469  | 0.933759 |
| 1248.75  | 942.353  | 0.606091 | -0.656041888 | 0.862446 |
| 1.00067  | 2.00137  | 0.583589 | #NUM!        | 0.308068 |
| 1248.75  | 942.353  | 0.606091 | -0.656041888 | 0.862446 |
| 0        | 0        | ?        | #DIV/0!      | ?        |
| 4.46E-16 | 8.12E-17 | ?        | -32.13174719 | ?        |
| 1552.51  | 1313.5   | 0.717522 | -0.667429526 | 0.831225 |
| 977.5    | 983.5    | 0.936954 | -0.123184763 | 0.932242 |
| 65       | 74       | 0.820955 | -0.467778961 | 0.735779 |
| 704.5    | 684      | 0.854087 | -0.29554897  | 0.876695 |
| 484      | 587      | 0.962819 | 0.086761312  | 0.909779 |
| 1000.99  | 1006.99  | 0.847469 | -0.30275745  | 0.842741 |
| 643.5    | 700      | 0.775072 | -0.448682378 | 0.705869 |
| 392.745  | 368.35   | 0.892869 | -0.240963352 | 0.935935 |
| 1322.28  | 1229.45  | 0.530623 | -0.787189587 | 0.597364 |
| 0        | 0        | 0.308068 | #DIV/0!      | 0.308068 |
| 8487.74  | 8277.01  | 0.890442 | -0.275122464 | 0.905986 |
| 4525.94  | 5336.5   | 0.905116 | -0.259232134 | 0.804227 |
| 1015     | 1857.5   | 0.734236 | -1.148060224 | 0.418279 |
| 4285     | 4349     | 0.680334 | -0.830561403 | 0.670399 |
| 3538.02  | 3232.43  | 0.621351 | -0.989477251 | 0.681116 |
| 1132.5   | 1061     | 0.981508 | 0.035235472  | 0.934396 |
| 2579.06  | 2500.96  | 0.507315 | -1.418992193 | 0.526524 |
| 596.5    | 614      | 0.536956 | -1.544421295 | 0.520244 |
| 679.007  | 646.496  | 0.814186 | -0.386308253 | 0.85128  |
| 1338.5   | 1393.5   | 0.975118 | -0.056044707 | 0.948329 |
| 41       | 65       | 0.905213 | -0.291462814 | 0.624526 |
| 1859.5   | 1992     | 0.853037 | -0.356376584 | 0.806494 |
| 1290     | 1330     | 0.840608 | -0.352301744 | 0.81838  |
| 11574.5  | 10499    | 0.98225  | 0.025083459  | 0.888766 |
| 359.5    | 378.5    | 0.51379  | -0.90488546  | 0.471241 |
| 818.5    | 815.5    | 0.850003 | -0.371916937 | 0.852379 |
| 67.5     | 55       | 0.829051 | -0.362570079 | 0.971169 |
| 190      | 194      | 0.816229 | 0.372658897  | 0.829027 |
| 1034.5   | 1001.98  | 0.601493 | -1.407387616 | 0.6191   |
| 317.501  | 456.503  | 0.832169 | 0.437582234  | 0.960024 |
| 7697.86  | 9751.48  | 0.760818 | -0.707065038 | 0.61285  |
| 13340.1  | 11255    | 0.51927  | -1.453494402 | 0.621352 |
| 107      | 89.4999  | 0.942227 | -0.141554144 | 0.956644 |
| 5878     | 6494     | 0.907866 | -0.239469344 | 0.845724 |
| 30.2387  | 50.9207  | 0.635926 | -1.738964446 | 0.375741 |
| 2392.49  | 3003.92  | 0.797944 | -0.564408289 | 0.651247 |
| 7394.74  | 8613.77  | 0.941854 | -0.146357628 | 0.843865 |
| 7506.27  | 7517.07  | 0.979326 | -0.042787033 | 0.978309 |
| 2786.5   | 3217     | 0.899882 | -0.232046066 | 0.798392 |
| 371.5    | 312.5    | 0.941058 | -0.098426548 | 0.917117 |
| 1312     | 1125.5   | 0.595724 | -0.54698037  | 0.766452 |
| 37       | 43       | 0.591363 | -1.121990524 | 0.492906 |
| 229.5    | 239.5    | 0.727519 | -0.43720888  | 0.685589 |

|         |         |          |              |          |
|---------|---------|----------|--------------|----------|
| 3318.09 | 3527.49 | 0.76906  | -0.548582561 | 0.725634 |
| 598.689 | 376.05  | 0.953296 | -0.101321892 | 0.794124 |
| 8988    | 9575.5  | 0.798757 | -0.463570772 | 0.753083 |
| 3644.11 | 3484.11 | 0.724456 | -0.606462785 | 0.757875 |
| 821.5   | 885.5   | 0.82814  | -0.431818347 | 0.778248 |
| 2492.5  | 2385    | 0.826251 | -0.376111541 | 0.858303 |
| 1400.5  | 1274    | 0.993852 | 0.012308884  | 0.929187 |
| 3.5     | 3       | 0.102728 | -2.807354922 | 0.14822  |
| 3183    | 3790    | 0.736533 | -0.626342824 | 0.609147 |
| 687.5   | 683     | 0.507444 | -0.880251471 | 0.513074 |
| 728     | 748.5   | 0.834978 | -0.326642383 | 0.812668 |
| 173     | 204     | 0.844083 | -0.390234108 | 0.731757 |
| 3483.5  | 3177    | 0.951053 | -0.097441295 | 0.982992 |
| 2374.99 | 2659.49 | 0.945513 | -0.132215628 | 0.871699 |
| 221     | 532.003 | 0.710206 | 1.033880987  | 0.897286 |
| 1279    | 1327.5  | 0.822005 | -0.481596761 | 0.798972 |
| 101.5   | 107.5   | 0.709579 | -0.832445903 | 0.673704 |
| 2324.03 | 2269.51 | 0.768845 | -0.420861744 | 0.78945  |
| 453.999 | 460.501 | 0.830445 | -0.358943835 | 0.819708 |
| 538.498 | 525.499 | 0.90671  | -0.19321699  | 0.924583 |
| 825     | 954.5   | 0.938586 | -0.151031909 | 0.842971 |
| 442.5   | 496.5   | 0.742074 | -0.612114107 | 0.658795 |
| 228.5   | 237     | 0.9016   | -0.199425735 | 0.873579 |
| 2       | 3.5     | 1        | 0            | 0.648511 |
| 100     | 157     | 0.954613 | -0.120295802 | 0.650149 |
| 4201.5  | 4648    | 0.803786 | -0.413035861 | 0.724543 |
| 2092.5  | 2084    | 0.695264 | -0.505491098 | 0.699134 |
| 2374.5  | 2147    | 0.7953   | -0.339963928 | 0.887338 |
| 7916.5  | 6761    | 0.41612  | -0.648579347 | 0.613559 |
| 1168.5  | 1101    | 0.799302 | -0.320077299 | 0.856379 |
| 149     | 182     | 0.972181 | -0.059297184 | 0.821507 |
| 1505    | 1448    | 0.783889 | -0.417275971 | 0.815481 |
| 87.5    | 87      | 0.767524 | -0.451211112 | 0.772256 |
| 1962.91 | 1932.67 | 0.801652 | -0.331189075 | 0.81612  |
| 4284    | 4900    | 0.926742 | -0.156537812 | 0.826116 |
| 3250    | 3583.5  | 0.762161 | -0.488493036 | 0.683394 |
| 85      | 98      | 0.608059 | -0.455194626 | 0.437419 |
| 387.5   | 475     | 0.963381 | -0.092240946 | 0.831778 |
| 846     | 808     | 0.952194 | -0.107965009 | 0.98196  |
| 669.5   | 669.5   | 0.96365  | -0.065009896 | 0.96365  |
| 352.5   | 437.5   | 0.995906 | -0.010268335 | 0.857888 |
| 1.5     | 1       | 1        | 0            | 0.810902 |
| 4168.66 | 3708.1  | 0.682833 | -0.549128088 | 0.78837  |
| 3013    | 3020.5  | 0.80084  | -0.35577995  | 0.798648 |
| 465     | 486     | 0.877528 | -0.283658078 | 0.847079 |
| 625     | 675     | 0.74574  | -0.394410849 | 0.667608 |
| 639.505 | 737.001 | 0.925995 | -0.164721166 | 0.823342 |
| 682.5   | 659.5   | 0.838041 | -0.32060755  | 0.864978 |
| 2936.5  | 2547.5  | 0.763136 | -0.339972832 | 0.910789 |
| 467     | 423.5   | 0.735798 | -0.522982832 | 0.813923 |
| 3055.5  | 2942    | 0.787025 | -0.464101782 | 0.814909 |
| 544     | 702.499 | 0.661406 | -0.504380074 | 0.406878 |
| 63      | 221     | 0.564615 | -1.362570079 | 0.045933 |
| 5       | 4.5     | 0.930262 | 0.137503524  | 0.861354 |
| 14      | 10.5    | 0.957881 | 0.099535674  | 0.813078 |
| 561     | 569.5   | 0.811685 | 0.37593768   | 0.821009 |

|         |         |          |              |          |
|---------|---------|----------|--------------|----------|
| 3559.5  | 3252.5  | 0.86655  | 0.264587252  | 0.810811 |
| 145.5   | 189     | 0.833148 | -0.484435625 | 0.670207 |
| 2705.48 | 1602.02 | 0.395849 | -1.559327947 | 0.730448 |
| 646.5   | 635     | 0.962126 | -0.092142725 | 0.973007 |
| 799.5   | 830     | 0.90168  | -0.231443235 | 0.876659 |
| 2308.5  | 2467    | 0.772076 | -0.492820139 | 0.721165 |
| 8629.53 | 8131.54 | 0.531084 | -0.709654225 | 0.590142 |
| 2468.52 | 2670.5  | 0.839778 | -0.337836196 | 0.779172 |
| 726     | 883.5   | 0.394763 | -0.822587326 | 0.234061 |
| 2183.5  | 2217    | 0.951138 | -0.11944703  | 0.941728 |
| 165.5   | 171.5   | 0.559221 | -0.741330787 | 0.526725 |
| 569     | 749     | 0.892821 | -0.249909728 | 0.691093 |
| 1540.5  | 2306.98 | 0.831337 | -0.455398558 | 0.556996 |
| 1401.5  | 1300.5  | 0.829051 | -0.387339894 | 0.880624 |
| 8023.09 | 10305.5 | 0.788209 | -0.509842223 | 0.606091 |
| 2658.98 | 3098.95 | 0.8957   | -0.215197766 | 0.774978 |
| 631.398 | 633.292 | 0.731134 | -0.518000052 | 0.728623 |
| 24.5    | 27.5    | 0.765025 | 0.407657969  | 0.851055 |
| 974.006 | 1018.98 | 0.919906 | -0.173724457 | 0.887599 |
| 854.001 | 842.988 | 0.742354 | -0.58074196  | 0.751859 |
| 6.5     | 6.5     | 0.949246 | 0.106915204  | 0.949246 |
| 1320.5  | 1280    | 0.837601 | -0.349364185 | 0.860357 |
| 1192.5  | 1082    | 0.764683 | -0.600470595 | 0.826854 |
| 2914.5  | 2460.5  | 0.512128 | -0.923600635 | 0.653174 |
| 774     | 331     | 0.977384 | 0.039528364  | 0.553703 |
| 0       | 0       | 0.308068 | #DIV/0!      | 0.308068 |
| 7857.88 | 7614.49 | 0.56998  | -0.63926013  | 0.602033 |
| 1453    | 1456.5  | 0.888163 | -0.243899454 | 0.886449 |
| 901     | 832     | 0.841359 | -0.288884057 | 0.907669 |
| 400     | 492.5   | 0.844412 | -0.377069649 | 0.697025 |
| 1535.5  | 1438.5  | 0.788206 | -0.459725261 | 0.835988 |
| 1579.51 | 1608.5  | 0.855832 | -0.310678111 | 0.842442 |
| 1578    | 1543    | 0.792253 | -0.40834849  | 0.810363 |
| 2415.5  | 2505.5  | 0.691764 | -0.697009522 | 0.664488 |
| 15.5    | 14.5    | 0.905546 | 0.175086707  | 0.858965 |
| 4230.39 | 3837.08 | 0.836375 | -0.318450361 | 0.912483 |
| 3041.5  | 3090.5  | 0.814061 | -0.430376586 | 0.802809 |
| 464     | 440     | 0.814838 | -0.354155257 | 0.857993 |
| 581     | 608     | 0.816676 | -0.481954635 | 0.787719 |
| 3423.6  | 3182.06 | 0.839516 | -0.279788295 | 0.903081 |
| 1841    | 1772.5  | 0.70919  | -0.592426426 | 0.739403 |
| 1002    | 961     | 0.739996 | -0.447066353 | 0.778153 |
| 1259    | 1411    | 0.232657 | -0.68888383  | 0.144055 |
| 2199    | 2380.5  | 0.812361 | -0.426674856 | 0.754532 |
| 3323.97 | 3376.5  | 0.532595 | -0.640699923 | 0.516015 |
| 485     | 515.5   | 0.15608  | -0.855751747 | 0.120847 |
| 1006.5  | 841     | 0.483166 | -0.644214579 | 0.693797 |
| 1011    | 994.443 | 0.689611 | -0.454090276 | 0.707051 |
| 789.002 | 789.001 | 0.806949 | -0.331565815 | 0.806951 |
| 2441    | 2317    | 0.914361 | -0.185486122 | 0.95032  |
| 2057    | 2476.05 | 0.962652 | -0.092299796 | 0.84146  |
| 161.5   | 165.5   | 0.90406  | -0.216449282 | 0.887169 |
| 4238.5  | 4448.5  | 0.831692 | -0.422260231 | 0.79983  |
| 5332.5  | 4768    | 0.947531 | -0.106946421 | 0.974707 |
| 3118.5  | 3065    | 0.345451 | -2.215392954 | 0.354522 |
| 1574.5  | 1656    | 0.831422 | -0.37988671  | 0.794922 |

|         |         |           |              |           |
|---------|---------|-----------|--------------|-----------|
| 3780.5  | 3142.01 | 0.989925  | 0.020273283  | 0.870573  |
| 13.5    | 18.5    | 0.582346  | -1.754887502 | 0.417474  |
| 682.5   | 715     | 0.969871  | -0.068171503 | 0.938857  |
| 2114.36 | 2464.03 | 0.817368  | -0.398825747 | 0.699845  |
| 3893.5  | 3595    | 0.98694   | 0.021697836  | 0.92106   |
| 0       | 0       | ?         | #DIV/0!      | ?         |
| 106     | 99.5    | 0.864422  | -0.252185403 | 0.915867  |
| 3.5     | 1       | 0.3646    | -1.807354922 | 1         |
| 68      | 149     | 0.925888  | 0.234465254  | 0.602001  |
| 450.365 | 412.022 | 0.757609  | -0.376999135 | 0.845059  |
| 0.5     | 0.5     | 1         | 0            | 1         |
| 0.5     | 0       | 1         | 0            | 0.450185  |
| 333     | 427.5   | 0.993076  | -0.017434593 | 0.831501  |
| 3224.12 | 2424.55 | 0.465009  | -1.46858787  | 0.644742  |
| 483.5   | 527     | 0.908465  | -0.210012947 | 0.848597  |
| 340.5   | 290     | 0.574643  | -0.753299505 | 0.716648  |
| 272     | 84.5    | 0.590162  | 0.828416538  | 0.338771  |
| 26      | 31.5    | 0.339373  | -1.612976877 | 0.23304   |
| 0       | 0       | ?         | #DIV/0!      | ?         |
| 33912.5 | 27457.1 | 0.111896  | -0.818998648 | 0.299746  |
| 123.5   | 354     | 0.847625  | -0.91494423  | 0.374372  |
| 8.5     | 11.5    | 0.887461  | -0.280107919 | 0.675723  |
| 1257.5  | 1778.5  | 0.759942  | -0.722695497 | 0.541723  |
| 22      | 29      | 0.804489  | -0.415037499 | 0.582511  |
| 385     | 342     | 0.669082  | -0.519936358 | 0.785262  |
| 716.501 | 675     | 0.983483  | -0.029489467 | 0.969241  |
| 0.5     | 0.5     | 0.450185  | #NUM!        | 0.450185  |
| 247.5   | 247.5   | 0.742171  | 0.593679718  | 0.742171  |
| 241     | 182.5   | 0.369366  | -1.453457718 | 0.561548  |
| 75.5    | 69      | 0.730982  | 0.562495161  | 0.686105  |
| 6162.5  | 6057    | 0.479533  | -0.925074985 | 0.494195  |
| 1       | 0.5     | 0.651448  | -1           | 1         |
| 80      | 81      | 0.511196  | -1.649502753 | 0.504087  |
| 936.5   | 1065.5  | 0.828809  | -0.38631229  | 0.73329   |
| 171.5   | 271     | 0.723104  | -0.539421717 | 0.34684   |
| 0       | 0       | ?         | #DIV/0!      | ?         |
| 0       | 0       | ?         | #DIV/0!      | ?         |
| 10.5    | 17      | 0.802412  | 0.465663572  | 0.875277  |
| 852     | 1015.5  | 0.932477  | -0.157280792 | 0.809572  |
| 210.66  | 170.74  | 0.397279  | -0.82017725  | 0.61789   |
| 133     | 133     | 0.661843  | -0.571466658 | 0.661843  |
| 128.5   | 142.5   | 0.484991  | -1.85587743  | 0.428107  |
| 285     | 288.5   | 0.657179  | -0.569855608 | 0.645609  |
| 43628.5 | 42930   | 0.231943  | -0.511173568 | 0.252229  |
| 0       | 0       | ?         | #DIV/0!      | ?         |
| 161     | 168     | 0.852308  | -0.286522759 | 0.817544  |
| 0       | 4       | 1         | #DIV/0!      | 0.0162766 |
| 792.5   | 1132    | 0.945775  | -0.137412505 | 0.701376  |
| 1       | 3.5     | 0.639437  | 1.584962501  | 0.904922  |
| 83.4041 | 107.801 | 0.519711  | -0.740965739 | 0.297778  |
| 12.5    | 16      | 0.76249   | -0.736965594 | 0.61306   |
| 7       | 13      | 0.80143   | -0.807354922 | 0.470402  |
| 90.5    | 102.5   | 0.848315  | -0.360294535 | 0.760827  |
| 43.5    | 4       | 0.0312746 | -0.742503778 | 0.0170148 |
| 210     | 134     | 0.479267  | -0.559427409 | 0.92557   |
| 50.5    | 27      | 0.57292   | -0.800230488 | 0.956894  |

|         |         |          |              |           |
|---------|---------|----------|--------------|-----------|
| 3.99668 | 8.90023 | 0.764437 | 0.792957838  | 0.839049  |
| 1       | 3       | 0.853306 | -1           | 0.388227  |
| 1       | 1.5     | 0.593125 | 1.321928095  | 0.717686  |
| 0.5     | 2       | 0.710482 | 1            | 0.474021  |
| 32      | 20      | 0.120766 | -2           | 0.361235  |
| 80.7507 | 91.9107 | 0.763389 | -0.409531582 | 0.642786  |
| 1       | 3.5     | 0.545627 | 2            | 0.917002  |
| 12      | 11      | 0.171387 | -2.263034406 | 0.207565  |
| 1477.5  | 1478    | 0.630506 | -0.598205078 | 0.63018   |
| 1035.5  | 804     | 0.762422 | -0.513280034 | 0.938483  |
| 1671    | 1610    | 0.939222 | -0.143776591 | 0.962577  |
| 782.5   | 614     | 0.436915 | -0.659205695 | 0.736379  |
| 1673.5  | 1468.5  | 0.739221 | -0.505304833 | 0.844426  |
| 2204.66 | 1809.19 | 0.886203 | -0.23345016  | 0.977048  |
| 3.5     | 1.5     | 0.493436 | -1.807354922 | 0.88627   |
| 3730.6  | 4063.29 | 0.788335 | -0.48743917  | 0.726131  |
| 7.52761 | 4.61606 | 0.78537  | -0.267735659 | 0.727854  |
| 2       | 1.5     | 0.680109 | -1           | 0.834708  |
| 350.5   | 342     | 0.715006 | -0.601521593 | 0.734044  |
| 0       | 2.5     | 0.370757 | #DIV/0!      | 1         |
| 1367.16 | 1300.89 | 0.772144 | -0.418460566 | 0.81462   |
| 931.444 | 870.752 | 0.864349 | -0.287196162 | 0.912925  |
| 14.5    | 3       | 0.276408 | -1.157541277 | 0.602218  |
| 3.5     | 0.5     | 0.345015 | -1.807354922 | 0.837425  |
| 15      | 37.696  | 0.995253 | -0.020223399 | 0.529763  |
| 634.998 | 672.506 | 0.819788 | -0.514565383 | 0.785546  |
| 1756    | 1689    | 0.550166 | -0.69260467  | 0.588457  |
| 56.5    | 33.5    | 0.620312 | -0.670431843 | 0.961483  |
| 30676   | 19728   | 0.310046 | -0.614227866 | 0.973727  |
| 41      | 38.5    | 0.974875 | -0.053771256 | 0.983247  |
| 6588.92 | 6214.47 | 0.664444 | -0.435356138 | 0.732739  |
| 18.5    | 10.5    | 0.963767 | -0.080170349 | 0.75272   |
| 644     | 709     | 0.862543 | -0.298871151 | 0.790621  |
| 6       | 1.5     | 0.695649 | -0.777607579 | 0.753076  |
| 757.564 | 824.617 | 0.860349 | -0.343864019 | 0.803651  |
| 220.5   | 266.5   | 0.730878 | -0.970853654 | 0.62769   |
| 49      | 40      | 0.949074 | -0.122856748 | 0.936381  |
| 10.5    | 11      | 0.893558 | 0.251538767  | 0.920005  |
| 36.5    | 40      | 0.848359 | -0.331843564 | 0.779986  |
| 258.5   | 408.001 | 0.743825 | -0.74723393  | 0.447862  |
| 2       | 1.5     | 0.698091 | 0.807354922  | 0.608871  |
| 74.1212 | 84.6826 | 0.769149 | -0.431304749 | 0.652526  |
| 164.822 | 170.48  | 0.645795 | -0.896571093 | 0.622558  |
| 308     | 369.5   | 0.822575 | -0.371968777 | 0.677185  |
| 91      | 83      | 0.697714 | -0.577057303 | 0.774333  |
| 4.5     | 6       | 0.478585 | 1.289506617  | 0.578605  |
| 1.5     | 4.5     | 0.439843 | 2            | 0.786483  |
| 13.5    | 26.5    | 0.454899 | -0.506959989 | 0.0357864 |
| 1412.5  | 1599    | 0.650653 | -1.071717729 | 0.574835  |
| 1517.18 | 1454.23 | 0.477771 | -0.710007293 | 0.522188  |
| 1818    | 1956.5  | 0.670705 | -0.800230488 | 0.618464  |
| 0       | 0       | ?        | #DIV/0!      | ?         |
| 12      | 13      | 1        | 0            | 0.942559  |
| 59762.1 | 56407.8 | 0.715772 | -0.390051492 | 0.780012  |
| 0       | 0       | ?        | #DIV/0!      | ?         |
| 428     | 517     | 0.876064 | -0.271825169 | 0.732518  |



|         |         |          |              |          |
|---------|---------|----------|--------------|----------|
| 117.5   | 267     | 0.50161  | 1.469996787  | 0.844091 |
| 270.502 | 305.762 | 0.26743  | -0.688337802 | 0.165458 |
| 68.5    | 71.5    | 0.729418 | -0.671767328 | 0.699851 |
| 38.5    | 41      | 0.68556  | -1.137503524 | 0.651731 |
| 261     | 133     | 0.935482 | -0.121015401 | 0.684553 |
| 0       | 1       | 1        | #DIV/0!      | 0.308068 |
| 2       | 0       | 0.776298 | 0.53224713   | 0.387967 |
| 4638.51 | 5191.48 | 0.907597 | -0.263207969 | 0.842615 |
| 584     | 565     | 0.60562  | -0.618071915 | 0.638221 |
| 4170.98 | 5010.41 | 0.900555 | -0.270686352 | 0.786793 |
| 260     | 188.5   | 0.936938 | -0.103504576 | 0.814927 |
| 21      | 13.5    | 0.512834 | -1.070389328 | 0.828964 |
| 10      | 13      | 0.538742 | -2           | 0.404166 |
| 14273.5 | 14483   | 0.821589 | -0.284859043 | 0.807405 |
| 0       | 0       | ?        | #DIV/0!      | ?        |
| 3.5     | 6       | 0.891746 | 0.362570079  | 0.83859  |
| 0       | 1.5     | 0.545627 | #DIV/0!      | 0.756486 |
| 2       | 1       | 0.785812 | -0.415037499 | 0.785812 |
| 0       | 2       | 0.622002 | #DIV/0!      | 0.622002 |
| 0       | 0       | ?        | #DIV/0!      | ?        |
| 1       | 1       | 1        | 0            | 1        |
| 250.733 | 192.152 | 0.284643 | -1.313654725 | 0.486469 |
| 24      | 30      | 0.867006 | -0.337034987 | 0.715305 |
| 685.5   | 694.5   | 0.863684 | -0.340195328 | 0.855307 |
| 6.5     | 5.5     | 0.594754 | 1.157541277  | 0.552249 |
| 192     | 271     | 0.230497 | -2.337034987 | 0.107922 |
| 426.5   | 522     | 0.704542 | -0.716811203 | 0.558707 |
| 80031.1 | 86148.8 | 0.237815 | -0.588771153 | 0.168696 |
| 198     | 207     | 0.83745  | -0.439532061 | 0.810094 |
| 472.408 | 572.242 | 0.684554 | -0.490108742 | 0.493982 |
| 129     | 194.5   | 0.910066 | 0.25086759   | 0.850394 |
| 457.5   | 1183.5  | 0.891883 | 0.38516697   | 0.579972 |
| 643.462 | 769.497 | 0.989228 | -0.021558718 | 0.848428 |
| 5       | 2       | 0.502754 | -1           | 0.888898 |
| 218.5   | 208     | 0.776054 | -0.476868721 | 0.813074 |
| 521.5   | 362.5   | 0.435079 | -2.199974955 | 0.621577 |
| 0.5     | 0.5     | 0.450185 | #NUM!        | 0.450185 |
| 0       | 0       | ?        | #DIV/0!      | ?        |
| 0.5     | 0       | 0.308068 | #NUM!        | 1        |
| 7.5     | 7.5     | 0.790729 | -0.584962501 | 0.790729 |
| 95      | 207.5   | 0.819858 | -0.493040011 | 0.295331 |
| 4.5     | 3.5     | 0.355889 | -2.169925001 | 0.493436 |
| 2716.5  | 2739.5  | 0.738661 | -0.410353851 | 0.730254 |
| 9.5     | 2.5     | 0.34614  | -1.247927513 | 0.780937 |
| 1033.5  | 2285    | 0.974259 | -0.092225585 | 0.52357  |
| 19.9724 | 24.8839 | 0.697401 | 0.622456715  | 0.830752 |
| 423.5   | 257     | 0.983453 | 0.036994207  | 0.740501 |
| 0       | 0       | ?        | #DIV/0!      | ?        |
| 9       | 10.5    | 0.739226 | -0.169925001 | 0.428621 |
| 3679    | 3513.5  | 0.63142  | -0.604604737 | 0.675297 |
| 1911.51 | 1767.49 | 0.7187   | -0.471090291 | 0.791557 |
| 21.5    | 28      | 0.965554 | 0.065588342  | 0.813203 |
| 122.5   | 219.5   | 0.688472 | -1.264212597 | 0.37423  |
| 329     | 397     | 0.917664 | -0.227517454 | 0.80366  |
| 160.922 | 135.385 | 0.762735 | -0.579651453 | 0.874381 |
| 118.5   | 148     | 0.902525 | -0.252118628 | 0.7564   |

|         |         |          |              |            |
|---------|---------|----------|--------------|------------|
| 39      | 29.5    | 0.935607 | -0.135655099 | 0.889975   |
| 51.5    | 36.5    | 0.406958 | -1.194647431 | 0.673937   |
| 356     | 401     | 0.907573 | -0.220704861 | 0.826777   |
| 14      | 24      | 0.762182 | -0.900464326 | 0.462047   |
| 2       | 20.5    | 0.873517 | -0.415037499 | 0.00713633 |
| 40      | 13.9402 | 0.352635 | -1.113746421 | 0.831645   |
| 12.5    | 15.5    | 0.618972 | -0.736965594 | 0.441636   |
| 1127.01 | 1097.51 | 0.785758 | -0.597191859 | 0.801743   |
| 72      | 75      | 0.915078 | 0.187627003  | 0.940465   |
| 852     | 2103    | 0.948532 | -0.201379888 | 0.453012   |
| 349308  | 359902  | 0.178501 | -1.500818285 | 0.164401   |
| 315.5   | 312     | 0.557424 | -1.016093976 | 0.565576   |
| 228.5   | 162     | 0.634863 | -0.887683123 | 0.859198   |
| 0       | 0       | 0.308068 | #DIV/0!      | 0.308068   |
| 0       | 0       | ?        | #DIV/0!      | ?          |
| 441.5   | 837     | 0.819513 | -0.545478295 | 0.409142   |
| 1       | 3.5     | 0.545627 | 2            | 0.917002   |
| 0       | 0       | ?        | #DIV/0!      | ?          |
| 2032.5  | 2066.5  | 0.20952  | -0.877903967 | 0.19732    |
| 4780.09 | 4578.98 | 0.688528 | -0.399852976 | 0.739305   |
| 65      | 77      | 0.791092 | -0.452512205 | 0.659042   |
| 142.5   | 150.5   | 0.321006 | -2.347463187 | 0.294005   |
| 569     | 611.5   | 0.998153 | -0.00380826  | 0.945873   |
| 42.5    | 33.512  | 0.581512 | -1.120286854 | 0.732792   |
| 17      | 50.5    | 0.615202 | -0.765534746 | 0.0480706  |
| 41      | 47.5    | 0.765196 | 0.487938046  | 0.855598   |
| 9615.5  | 9540.5  | 0.801306 | -0.391056713 | 0.80763    |
| 2       | 0.5     | 1        | 0            | 0.481309   |
| 48      | 47      | 0.495115 | -0.970252657 | 0.512179   |
| 568.5   | 503     | 0.632358 | -0.651170652 | 0.741068   |
| 25      | 168.5   | 0.7823   | 1.22650853   | 0.394319   |
| 0.5     | 5.03019 | 0.805641 | 1.006017897  | 0.121283   |
| 102     | 182.5   | 0.58902  | -2.424497829 | 0.320342   |
| 834.5   | 829     | 0.820205 | -0.382840144 | 0.825159   |
| 447     | 488.5   | 0.930957 | -0.171135824 | 0.874229   |
| 76.5    | 67      | 0.939285 | -0.087462841 | 0.932563   |
| 1475.5  | 1553.01 | 0.947426 | -0.110718461 | 0.910241   |
| 458.5   | 489     | 0.760518 | -0.459234972 | 0.705893   |
| 7       | 11      | 0.525691 | -1.485426827 | 0.269144   |
| 82.5    | 120.5   | 0.790579 | -0.679821687 | 0.564353   |
| 34      | 35.5    | 0.761401 | -0.595609745 | 0.732031   |
| 79.5    | 18.5    | 0.602293 | -0.430239906 | 0.334605   |
| 12076.5 | 10126.5 | 0.571298 | -0.582098234 | 0.766185   |
| 22      | 9       | 0.858603 | 0.2410081    | 0.470196   |
| 62.5    | 78.5    | 0.762959 | -0.556393349 | 0.594106   |
| 55      | 44      | 0.544655 | -0.974004791 | 0.713531   |
| 772     | 507.5   | 0.798298 | -0.369662134 | 0.894665   |
| 0.5     | 1.50469 | 0.97968  | 0.105128247  | 0.530385   |
| 8565.72 | 9893.99 | 0.797112 | -0.495459772 | 0.695812   |
| 9.5     | 14.5    | 0.822647 | -0.662965013 | 0.594522   |
| 1842.5  | 1579.5  | 0.471541 | -1.409696832 | 0.571406   |
| 1503.5  | 1981    | 0.905334 | 0.246790747  | 0.93339    |
| 119.5   | 91.5    | 0.808094 | 0.351798624  | 0.657692   |
| 1946.5  | 1853.98 | 0.889019 | -0.24806649  | 0.92221    |
| 3172.96 | 3362.54 | 0.85473  | -0.285665107 | 0.807706   |
| 611.768 | 459.058 | 0.398693 | -2.308473603 | 0.548276   |

|         |         |           |              |            |
|---------|---------|-----------|--------------|------------|
| 115     | 152     | 0.841107  | 0.36882907   | 0.983226   |
| 5642.5  | 5569.5  | 0.808177  | -0.380968277 | 0.818572   |
| 1754.47 | 1635.8  | 0.764786  | -0.467593344 | 0.820483   |
| 91.5    | 78.5    | 0.536342  | -1.657718843 | 0.619731   |
| 181.5   | 153     | 0.431186  | -1.323916648 | 0.550824   |
| 11      | 14.5    | 0.624576  | -0.652076697 | 0.3832     |
| 573.5   | 454.5   | 0.990725  | -0.016444751 | 0.841135   |
| 118     | 75      | 0.509174  | -1.282730207 | 0.794253   |
| 1       | 0       | 1         | 0            | 0.450185   |
| 2123    | 1827.5  | 0.529994  | -0.803368051 | 0.665822   |
| 17.5    | 7.5     | 0.444794  | 1.174497731  | 0.29165    |
| 13222.8 | 17423.2 | 0.245911  | -1.211563598 | 0.110704   |
| 788.966 | 691.505 | 0.677929  | -0.449720053 | 0.82093    |
| 8.5     | 8       | 0.750854  | -0.628031223 | 0.790729   |
| 0       | 0       | ?         | #DIV/0!      | ?          |
| 75      | 83.5    | 0.934129  | -0.120294234 | 0.842172   |
| 34      | 47.5    | 0.81532   | -0.53287399  | 0.601129   |
| 1065    | 1045.5  | 0.75914   | -0.406483501 | 0.776328   |
| 0       | 0       | ?         | #DIV/0!      | ?          |
| 0.5     | 0       | 0.308068  | #NUM!        | 1          |
| 6       | 5       | 0.376742  | -2.584962501 | 0.468351   |
| 2382    | 2411    | 0.571395  | -0.934869345 | 0.562202   |
| 62.5    | 24      | 0.355858  | -1.795859283 | 0.892589   |
| 2372.61 | 2304.8  | 0.674484  | -0.39742048  | 0.710257   |
| 0.5     | 0       | 0.0138468 | 2.807354922  | 0.00900735 |
| 6.20734 | 10.7026 | 0.587486  | 1.021445357  | 0.868762   |
| 692.5   | 709.5   | 0.715993  | -0.820960417 | 0.70109    |
| 76.5    | 76      | 0.859007  | -0.338524605 | 0.863344   |
| 893.502 | 1224.01 | 0.921978  | 0.160291469  | 0.833929   |
| 184.5   | 206.5   | 0.852792  | -0.210064392 | 0.72933    |
| 670.5   | 505.5   | 0.756061  | -0.394740085 | 0.992986   |
| 381.499 | 432.999 | 0.957305  | 0.112718341  | 0.97176    |
| 0.5     | 0.5     | 1         | 0            | 1          |
| 17      | 21      | 0.340466  | -1.765534746 | 0.22882    |
| 51      | 49.5    | 0.879571  | 0.258311996  | 0.861774   |
| 1       | 8.5     | 0.837425  | -1           | 0.0373471  |
| 243.5   | 228.5   | 0.826749  | -0.280319536 | 0.886373   |
| 1431.5  | 1323.47 | 0.657744  | -0.655969251 | 0.7234     |
| 0       | 1       | 1         | #DIV/0!      | 0.308068   |
| 0       | 1       | 0.353387  | #DIV/0!      | 0.622002   |
| 1065.5  | 1132.5  | 0.47327   | -0.632092679 | 0.406579   |
| 2.5     | 4       | 0.0714215 | #NUM!        | 0.022006   |
| 1844    | 1679.5  | 0.154206  | -1.87851705  | 0.194727   |
| 51.5    | 61.5    | 0.929982  | 0.133678435  | 0.929982   |
| 4236.4  | 4833.48 | 0.200507  | -2.074925733 | 0.148078   |
| 511.5   | 444.5   | 0.863602  | -0.213955584 | 0.993176   |
| 1899    | 2347.5  | 0.686454  | -0.785115682 | 0.536801   |
| 3732    | 4681    | 0.842247  | -0.397363784 | 0.685916   |
| 66.5    | 50.5    | 0.455968  | -1.124545098 | 0.66765    |
| 1254    | 1221    | 0.739207  | -0.571222444 | 0.759145   |
| 2575.5  | 2445.5  | 0.678027  | -0.560798981 | 0.72504    |
| 5.5     | 5.5     | 0.758248  | 0.540568381  | 0.758248   |
| 470.5   | 414     | 0.665296  | -0.378205026 | 0.833517   |
| 353.5   | 334.5   | 0.836662  | -0.313281563 | 0.881016   |
| 737     | 698.5   | 0.592467  | -1.21945912  | 0.62519    |
| 806.628 | 814.756 | 0.56228   | -0.856015041 | 0.554062   |

|         |         |           |              |          |
|---------|---------|-----------|--------------|----------|
| 1566.5  | 1126.5  | 0.212573  | -1.041576411 | 0.525567 |
| 182.5   | 315.5   | 0.971344  | -0.085487899 | 0.631039 |
| 492.5   | 482     | 0.77958   | -0.362779332 | 0.799981 |
| 638.5   | 665.5   | 0.925175  | -0.177713039 | 0.898077 |
| 279.801 | 226.927 | 0.539892  | -1.108610986 | 0.685356 |
| 342.5   | 304.5   | 0.772122  | -0.422780697 | 0.869733 |
| 1452.85 | 1515.35 | 0.865704  | -0.252702477 | 0.830512 |
| 665.498 | 657.505 | 0.965909  | 0.069819589  | 0.957663 |
| 101     | 130.5   | 0.847671  | 0.353015773  | 0.991761 |
| 11.5    | 4.5     | 0.970424  | 0.061400545  | 0.588628 |
| 193     | 225.5   | 0.832006  | -0.354052298 | 0.709217 |
| 2681.5  | 2530    | 0.711751  | -0.430271823 | 0.771814 |
| 1122.5  | 1008    | 0.833451  | -0.30833652  | 0.921031 |
| 2002.5  | 1945    | 0.750356  | -0.547099914 | 0.772045 |
| 315.417 | 344.463 | 0.614616  | -0.680742806 | 0.535952 |
| 1291.58 | 1223.54 | 0.755824  | -0.523178946 | 0.796523 |
| 948.5   | 1101.5  | 0.791179  | -0.534152867 | 0.689616 |
| 863.5   | 513.5   | 0.968745  | 0.055715761  | 0.6638   |
| 219.5   | 258.5   | 0.654693  | -0.685319989 | 0.519642 |
| 309     | 414.5   | 0.91654   | -0.197321565 | 0.704082 |
| 837     | 789.5   | 0.824271  | -0.351531808 | 0.869628 |
| 1023    | 1110    | 0.89717   | -0.213955584 | 0.83488  |
| 1177    | 1171.5  | 0.878671  | -0.282780754 | 0.881819 |
| 595     | 545.5   | 0.998236  | -0.003641639 | 0.943617 |
| 439.5   | 465     | 0.804024  | -0.50359495  | 0.767029 |
| 1101.5  | 1197    | 0.839456  | -0.24339144  | 0.753521 |
| 6137.98 | 6985.14 | 0.876112  | -0.31175258  | 0.790663 |
| 306     | 373.5   | 0.958153  | -0.100040907 | 0.82258  |
| 2878.25 | 2760.62 | 0.861353  | -0.25397542  | 0.896092 |
| 1700.21 | 1564.35 | 0.752371  | -0.50522956  | 0.817164 |
| 989     | 1101.5  | 0.915555  | -0.198282652 | 0.841935 |
| 732.5   | 756     | 0.951439  | -0.119010316 | 0.931828 |
| 6.5     | 7.5     | 0.805178  | -0.530514717 | 0.713348 |
| 1681.63 | 1538.13 | 0.774826  | -0.365534153 | 0.858842 |
| 6145.36 | 6221.53 | 0.701562  | -0.842917634 | 0.693846 |
| 1906    | 2041    | 0.615957  | -1.006068127 | 0.56976  |
| 190.5   | 223     | 0.948388  | -0.13901896  | 0.853681 |
| 977.5   | 1058    | 0.905882  | -0.193172282 | 0.845018 |
| 1575    | 2079    | 0.990828  | -0.017046252 | 0.747828 |
| 111     | 122     | 0.525419  | -1.624490865 | 0.471517 |
| 551.5   | 476.5   | 0.958989  | -0.091802023 | 0.950561 |
| 214.5   | 234.5   | 0.741318  | -0.722466024 | 0.6847   |
| 625.499 | 589.5   | 0.769254  | -0.45597059  | 0.816723 |
| 6189.12 | 5580.74 | 0.681182  | -0.575524842 | 0.771494 |
| 948.5   | 761     | 0.654772  | -0.804695576 | 0.807504 |
| 1498    | 1424    | 0.768363  | -0.444878479 | 0.810057 |
| 2087.48 | 2015.03 | 0.993675  | 0.014776198  | 0.97236  |
| 47      | 36.5    | 0.837448  | -0.425305835 | 0.97946  |
| 8715.55 | 8282.93 | 0.0772266 | -0.731804746 | 0.103435 |
| 236.208 | 298.593 | 0.950046  | -0.130048786 | 0.800157 |
| 21.5    | 16      | 0.441867  | -1.178337241 | 0.664843 |
| 82.5    | 86.5    | 0.734676  | -0.63840176  | 0.701219 |
| 1302    | 1279    | 0.831097  | -0.414298981 | 0.842797 |
| 15      | 22.5    | 0.881295  | 0.30256277   | 0.864578 |
| 1259    | 1196    | 0.873863  | -0.2286128   | 0.916624 |
| 34.5    | 25      | 0.870426  | -0.250543462 | 0.905456 |

|         |         |          |              |          |
|---------|---------|----------|--------------|----------|
| 20      | 19      | 0.574988 | -1.321928095 | 0.605594 |
| 1026    | 895.5   | 0.747432 | -0.550569656 | 0.846067 |
| 12      | 14      | 0.888898 | 0.115477217  | 0.888898 |
| 157.5   | 153     | 0.804047 | 0.415037499  | 0.787852 |
| 2896.53 | 2583    | 0.69359  | -0.623984368 | 0.783606 |
| 842.5   | 917.5   | 0.870945 | -0.311265112 | 0.813188 |
| 76      | 72      | 0.946379 | -0.118644496 | 0.982108 |
| 231.5   | 216.5   | 0.998467 | -0.003119342 | 0.955598 |
| 1364.5  | 1091.5  | 0.573638 | -0.55074472  | 0.831004 |
| 0       | 0       | ?        | #DIV/0!      | ?        |
| 63      | 52.5    | 0.315136 | -1.584962501 | 0.433304 |
| 323.5   | 403.5   | 0.827819 | -0.445838199 | 0.678259 |
| 93.9138 | 91.9539 | 0.945083 | -0.115023984 | 0.960015 |
| 30.5    | 29      | 0.972375 | 0.046542586  | 0.931052 |
| 0.5     | 0.5     | 0.393741 | 2.584962501  | 0.393741 |
| 99.5    | 92.5    | 0.797607 | -0.40780593  | 0.854221 |
| 20      | 21.5    | 0.891416 | 0.169925001  | 0.956388 |
| 1255    | 1202.5  | 0.8523   | -0.325524943 | 0.882496 |
| 1539    | 1737.5  | 0.866313 | -0.315730992 | 0.781383 |
| 547     | 517     | 0.864491 | -0.297735497 | 0.903982 |
| 125.5   | 100.5   | 0.676568 | -0.432384743 | 0.922097 |
| 3197    | 3458.5  | 0.899112 | -0.231521762 | 0.844369 |
| 1757.5  | 1818.5  | 0.647764 | -1.032794653 | 0.626561 |
| 1643    | 1497    | 0.629258 | -0.554767224 | 0.724791 |
| 442     | 376     | 0.72284  | -0.272202721 | 0.962338 |
| 124.5   | 123     | 0.828205 | -0.352671618 | 0.837535 |
| 1806.01 | 2021.49 | 0.31819  | -0.497767057 | 0.19104  |
| 733.839 | 747.756 | 0.863271 | -0.280466048 | 0.848858 |
| 669.998 | 630.003 | 0.816097 | -0.357348601 | 0.865246 |
| 55      | 60      | 0.861884 | 0.273922722  | 0.921514 |
| 137.5   | 209     | 0.470343 | -1.184424571 | 0.210244 |
| 2186.5  | 1818    | 0.633693 | -0.623240499 | 0.801421 |
| 716     | 759     | 0.845359 | -0.401666736 | 0.808191 |
| 32.5    | 18      | 0.35337  | -2.022367813 | 0.685086 |
| 14      | 14.5    | 0.803701 | -0.415037499 | 0.776745 |
| 1119.98 | 1125.99 | 0.925879 | -0.176689257 | 0.922442 |
| 0       | 0.5     | 1        | #DIV/0!      | 0.308068 |
| 574     | 548     | 0.434031 | -0.997488781 | 0.472711 |
| 79      | 83      | 0.627053 | -0.384917511 | 0.558609 |
| 342.5   | 336.5   | 0.697464 | -0.790603558 | 0.709124 |
| 71.5    | 65.5    | 0.590179 | -0.989946335 | 0.651777 |
| 196.5   | 161     | 0.989303 | 0.018239118  | 0.839138 |
| 0.5     | 1       | 0.622002 | #NUM!        | 0.353387 |
| 1166    | 1025.5  | 0.648513 | -0.798258551 | 0.741628 |
| 296.5   | 323.5   | 0.800494 | -0.477178674 | 0.739193 |
| 26.5    | 54.5    | 0.81738  | -0.518467089 | 0.339355 |
| 521     | 475     | 0.835909 | -0.354483313 | 0.901705 |
| 221     | 457     | 0.850631 | -0.521116019 | 0.422087 |
| 136.5   | 122     | 0.452944 | -1.337869639 | 0.529459 |
| 4032    | 3751.5  | 0.770891 | -0.339749372 | 0.844983 |
| 59.5    | 57.5    | 0.933682 | -0.153350777 | 0.955743 |
| 560.5   | 571.5   | 0.673667 | -0.983365638 | 0.661922 |
| 2614.5  | 2427    | 0.656106 | -0.588277138 | 0.724518 |
| 1666.5  | 1832.5  | 0.806998 | -0.484042366 | 0.742785 |
| 3434    | 3172    | 0.695679 | -0.582339132 | 0.761836 |
| 8.5     | 9       | 0.935389 | -0.180572246 | 0.903291 |

|         |         |          |              |          |
|---------|---------|----------|--------------|----------|
| 0       | 0       | ?        | #DIV/0!      | ?        |
| 273.5   | 280     | 0.223197 | -0.71169273  | 0.202674 |
| 86.0001 | 86.9999 | 0.583437 | -1.086416429 | 0.575658 |
| 0.5     | 0.5     | 1        | 0            | 1        |
| 105.5   | 285.5   | 0.860581 | -0.755314904 | 0.394512 |
| 71.5    | 79.5    | 0.679073 | -0.950417971 | 0.613178 |
| 465.5   | 515.5   | 0.844512 | -0.319605537 | 0.763685 |
| 6.5     | 7       | 0.559404 | 0.547487795  | 0.623326 |
| 61.5    | 66.5    | 0.548782 | -1.387925654 | 0.501332 |
| 129.5   | 120.5   | 0.839631 | -0.255257055 | 0.9077   |
| 208     | 304.5   | 0.508281 | -1.200593831 | 0.265893 |
| 34.5    | 40      | 0.645227 | -0.750972452 | 0.528753 |
| 1148.5  | 827.5   | 0.526476 | -0.67870012  | 0.866924 |
| 738     | 626.5   | 0.625575 | -0.469490697 | 0.820747 |
| 1091    | 1009    | 0.500249 | -0.788796463 | 0.57456  |
| 1502    | 1717    | 0.952249 | -0.120649251 | 0.867884 |
| 2004.5  | 2160    | 0.901301 | -0.259512041 | 0.855467 |
| 418     | 493     | 0.761039 | -0.495470838 | 0.627575 |
| 2712    | 2578.5  | 0.901288 | -0.219956296 | 0.935502 |
| 1884.5  | 2061    | 0.595613 | -1.338869464 | 0.543359 |
| 532     | 579     | 0.971486 | 0.059761215  | 0.968953 |
| 97      | 97.5    | 0.190301 | -1.410088283 | 0.187622 |
| 1046.57 | 1048.75 | 0.433732 | -1.050402478 | 0.432083 |
| 1694.5  | 1742.49 | 0.909979 | -0.208974533 | 0.891241 |
| 0.5     | 0.5     | 0.450185 | #NUM!        | 0.450185 |
| 49.5    | 68      | 0.768196 | -0.796466606 | 0.586864 |
| 1       | 2       | 0.450185 | #NUM!        | 0.18169  |
| 4268    | 3138    | 0.405825 | -0.595564675 | 0.847456 |
| 490.5   | 487     | 0.925697 | -0.161676294 | 0.930678 |
| 232     | 226     | 0.761565 | -0.487293588 | 0.782193 |
| 1269.5  | 1342.99 | 0.869935 | -0.332049311 | 0.834054 |
| 73.4999 | 55      | 0.737193 | -0.458203396 | 0.979706 |
| 584     | 608.5   | 0.917458 | -0.15090557  | 0.882927 |
| 1       | 0.5     | 0.651448 | -1           | 1        |
| 1909    | 1852.5  | 0.67364  | -0.562652822 | 0.701223 |
| 322.5   | 253.5   | 0.853981 | 0.270470995  | 0.71042  |
| 4288    | 4920.5  | 0.793338 | -0.296871194 | 0.643202 |
| 998.995 | 1042    | 0.770176 | -0.472484558 | 0.736661 |
| 1259.5  | 1043    | 0.851804 | -0.288806789 | 0.992146 |
| 721     | 638.5   | 0.883881 | -0.196939242 | 0.987943 |
| 64.5    | 70.5    | 0.775597 | -0.584962501 | 0.71671  |
| 21      | 30      | 0.823685 | 0.465663572  | 0.977677 |
| 1780.02 | 1812.6  | 0.849751 | -0.322937513 | 0.836329 |
| 1772.5  | 2262.5  | 0.937231 | -0.14591148  | 0.762197 |
| 1490.5  | 1332.5  | 0.61671  | -0.665831309 | 0.717995 |
| 1034.51 | 1099.99 | 0.945395 | -0.112370329 | 0.899561 |
| 337.5   | 296     | 0.704908 | -0.640520477 | 0.802013 |
| 559     | 555.5   | 0.777445 | -0.47027961  | 0.782256 |
| 1141.5  | 1050    | 0.739283 | -0.489603602 | 0.809312 |
| 386.5   | 431     | 0.913615 | -0.210620311 | 0.841565 |
| 300     | 380     | 0.845973 | -0.337034987 | 0.66249  |
| 517.5   | 478     | 0.770123 | 0.56578553   | 0.735563 |
| 147.5   | 198     | 0.512891 | -1.346590149 | 0.33078  |
| 74      | 159     | 0.680682 | -1.750021747 | 0.317597 |
| 122     | 111     | 0.606991 | -0.988222832 | 0.671353 |
| 2939.5  | 3333    | 0.89701  | 0.227466732  | 0.977647 |

|         |         |          |              |          |
|---------|---------|----------|--------------|----------|
| 100.5   | 91      | 0.867325 | 0.267811546  | 0.807432 |
| 169     | 166     | 0.873148 | -0.276758124 | 0.885902 |
| 3957    | 4148    | 0.612827 | -0.793160276 | 0.575048 |
| 2902    | 2590.48 | 0.469324 | -2.036247505 | 0.529554 |
| 732     | 687     | 0.900062 | -0.217637271 | 0.943779 |
| 73.5    | 96      | 0.955096 | -0.112209504 | 0.775995 |
| 888     | 793.5   | 0.870276 | -0.241746769 | 0.959503 |
| 864.5   | 1778.5  | 0.73988  | -0.853347039 | 0.307494 |
| 934     | 902.5   | 0.632626 | -0.905829045 | 0.656486 |
| 58      | 163.5   | 0.782618 | -0.975337946 | 0.251136 |
| 0       | 0       | ?        | #DIV/0!      | ?        |
| 441     | 465.5   | 0.562589 | -0.726643123 | 0.512882 |
| 279     | 290     | 0.893211 | -0.241478262 | 0.866255 |
| 884     | 927.5   | 0.847655 | -0.390227926 | 0.816825 |
| 2281.5  | 1987    | 0.991428 | -0.015608196 | 0.90607  |
| 777.5   | 794     | 0.887934 | -0.233101519 | 0.872195 |
| 62.5    | 75      | 0.736547 | -0.736965594 | 0.618384 |
| 281     | 240     | 0.604229 | -1.041669179 | 0.707037 |
| 80      | 86      | 0.64857  | 0.727920455  | 0.685219 |
| 0       | 0       | ?        | #DIV/0!      | ?        |
| 97.5    | 88.5    | 0.734545 | -0.509298231 | 0.814061 |
| 736.5   | 754     | 0.759284 | -0.560197959 | 0.742454 |
| 215.5   | 218     | 0.722644 | -0.532375539 | 0.712919 |
| 6       | 4.5     | 0.454021 | 1.772589504  | 0.413655 |
| 38      | 35.5    | 0.737112 | 0.682809824  | 0.710436 |
| 3.5     | 3.5     | 0.821423 | -0.485426827 | 0.821423 |
| 252     | 223     | 0.725292 | -0.453717967 | 0.839037 |
| 78.5    | 66      | 0.412558 | 1.547729595  | 0.379688 |
| 424     | 371     | 0.883358 | -0.214192859 | 0.988972 |
| 711.5   | 571     | 0.940201 | 0.119604657  | 0.806362 |
| 878.5   | 833.5   | 0.926537 | 0.136980903  | 0.889074 |
| 288.5   | 238     | 0.984688 | -0.032876156 | 0.896797 |
| 747.002 | 641.502 | 0.797073 | -0.371288661 | 0.922237 |
| 5178.29 | 4249.31 | 0.6662   | -0.590906218 | 0.83843  |
| 230     | 232     | 0.78923  | -0.357650017 | 0.781207 |
| 1320    | 1468    | 0.860613 | -0.317154342 | 0.783937 |
| 369     | 335.5   | 0.770784 | -0.377729887 | 0.859174 |
| 1226.5  | 1135    | 0.192821 | -0.706706064 | 0.269519 |
| 2403.5  | 2387.5  | 0.391636 | -0.723126448 | 0.398677 |
| 1654.5  | 1820    | 0.739647 | -0.521002779 | 0.661001 |
| 1571.5  | 1413    | 0.689367 | -0.535112219 | 0.785738 |
| 1001    | 1000    | 0.827692 | -0.361741185 | 0.828445 |
| 989.495 | 817.998 | 0.73685  | -0.53799993  | 0.880593 |
| 89.5    | 98      | 0.863328 | -0.32394444  | 0.800575 |
| 694.5   | 720     | 0.836826 | -0.364351734 | 0.810721 |
| 978.999 | 1173.52 | 0.84937  | -0.370067211 | 0.723574 |
| 419.5   | 408.5   | 0.776813 | -0.33966194  | 0.803762 |
| 236.5   | 284.5   | 0.442146 | -0.652076697 | 0.262488 |
| 193     | 162.5   | 0.546171 | -0.559034036 | 0.753096 |
| 694.552 | 812.684 | 0.880498 | -0.292156504 | 0.773229 |
| 1103.5  | 1306.37 | 0.744655 | -0.448956111 | 0.589285 |
| 1530    | 1585.49 | 0.905592 | -0.220653749 | 0.881698 |
| 86      | 104     | 0.802473 | 0.381090167  | 0.938317 |
| 2399.03 | 2564.55 | 0.978539 | -0.04830152  | 0.933672 |
| 343.499 | 349     | 0.732893 | -0.649375029 | 0.721834 |
| 5877.5  | 5774    | 0.996919 | 0.006490088  | 0.984888 |

|         |         |          |              |          |
|---------|---------|----------|--------------|----------|
| 1587.5  | 1929.5  | 0.855493 | -0.358162723 | 0.720843 |
| 878     | 912.5   | 0.637073 | -0.648794113 | 0.602683 |
| 3084.5  | 3123    | 0.690524 | -0.471879858 | 0.677851 |
| 14      | 19      | 0.638075 | -1.222392421 | 0.459011 |
| 7.20267 | 4.30277 | 0.90389  | -0.22591298  | 0.830535 |
| 23138.9 | 26301.3 | 0.824445 | -0.488064119 | 0.744659 |
| 411.5   | 417.5   | 0.930763 | -0.149473244 | 0.920555 |
| 1137.5  | 1158    | 0.769764 | -0.41355857  | 0.753923 |
| 344.5   | 357     | 0.844801 | -0.35421871  | 0.819581 |
| 8121.5  | 10279   | 0.841596 | 0.420334727  | 0.965667 |
| 304     | 336.5   | 0.919248 | -0.211753901 | 0.856845 |
| 1436.5  | 1317.47 | 0.759548 | 0.608043457  | 0.723789 |
| 3636    | 3838.5  | 0.89578  | 0.266436094  | 0.924236 |
| 5929.39 | 5269.46 | 0.774015 | -0.413598618 | 0.873052 |
| 649.499 | 618.999 | 0.654403 | -0.532608646 | 0.702788 |
| 3250    | 3855.5  | 0.883059 | -0.224058031 | 0.737849 |
| 2350    | 4464.5  | 0.988112 | 0.034575385  | 0.600372 |
| 499.5   | 691     | 0.644434 | -1.166679342 | 0.450821 |
| 373     | 361.5   | 0.764115 | -0.398373577 | 0.793114 |
| 2724.49 | 3423.02 | 0.843361 | -0.47218392  | 0.707348 |
| 61481.6 | 56852.5 | 0.968797 | -0.073882518 | 0.984139 |
| 420.998 | 332.5   | 0.658679 | -0.474495586 | 0.910522 |
| 33      | 16.5    | 0.486864 | -0.796466606 | 0.896663 |
| 2678.5  | 2724    | 0.78567  | -0.552343542 | 0.774693 |
| 15.3504 | 18.1109 | 0.795273 | 0.423674587  | 0.901808 |
| 1173.01 | 1068.51 | 0.744219 | -0.516510701 | 0.817426 |
| 700.5   | 619     | 0.996866 | 0.006165373  | 0.91201  |
| 1780.01 | 1337.51 | 0.325249 | -2.388278695 | 0.475762 |
| 291.5   | 337.5   | 0.931018 | -0.16498426  | 0.831939 |
| 599.503 | 650.505 | 0.81025  | -0.487839178 | 0.756443 |
| 1171    | 1085.5  | 0.912486 | -0.17950489  | 0.967013 |
| 1638    | 1485    | 0.768323 | -0.481117515 | 0.842703 |
| 373.5   | 374     | 0.990203 | 0.021089605  | 0.991093 |
| 1235    | 1052.5  | 0.855341 | -0.252095148 | 0.988577 |
| 288     | 314     | 0.902361 | -0.257035665 | 0.849182 |
| 1747.5  | 1872.5  | 0.868821 | -0.282734463 | 0.817344 |
| 386     | 466.5   | 0.836624 | -0.373288517 | 0.696009 |
| 3183.5  | 3401.5  | 0.856546 | -0.324649734 | 0.809081 |
| 52.5    | 58      | 0.660373 | 0.660793914  | 0.717123 |
| 22      | 27.5    | 0.801453 | -0.505235308 | 0.647109 |
| 1246    | 1234    | 0.983303 | -0.036941578 | 0.989663 |
| 337.5   | 381     | 0.794589 | -0.354349573 | 0.681464 |
| 2224.5  | 2046.5  | 0.747321 | -0.427958053 | 0.823621 |
| 2638    | 2666.5  | 0.772136 | -0.492169302 | 0.764005 |
| 389.5   | 370.5   | 0.993852 | 0.011069326  | 0.954955 |
| 741.5   | 763.5   | 0.779876 | -0.423167212 | 0.755395 |
| 2184    | 2068.5  | 0.722404 | -0.449802917 | 0.774635 |
| 390     | 421     | 0.907436 | -0.223626021 | 0.856907 |
| 1448    | 1451.5  | 0.69286  | -0.675682677 | 0.691033 |
| 866     | 1118    | 0.956517 | -0.105378242 | 0.781166 |
| 701.5   | 744     | 0.878505 | -0.236341596 | 0.83078  |
| 1406    | 1253    | 0.685211 | -0.539263028 | 0.790011 |
| 215     | 274.5   | 0.939633 | -0.170764022 | 0.793394 |
| 151.5   | 155.5   | 0.76148  | -0.542734265 | 0.742458 |
| 18.5    | 30.5    | 0.968037 | 0.075948853  | 0.665011 |
| 528.503 | 385.5   | 0.454845 | -2.115030513 | 0.617606 |



|         |         |          |              |           |
|---------|---------|----------|--------------|-----------|
| 2837.5  | 2663    | 0.740252 | -0.596191742 | 0.785452  |
| 0       | 0.5     | 1        | #DIV/0!      | 0.308068  |
| 3234    | 2978.5  | 0.638967 | -0.631889078 | 0.713151  |
| 0       | 0       | ?        | #DIV/0!      | ?         |
| 163.5   | 128     | 0.306919 | -1.013296823 | 0.534468  |
| 258.381 | 296.925 | 0.880061 | -0.249194499 | 0.771007  |
| 311     | 300.5   | 0.779047 | -0.335326934 | 0.81389   |
| 1704    | 1835.02 | 0.889666 | -0.250390197 | 0.837396  |
| 465.5   | 456.5   | 0.799209 | -0.366782331 | 0.815996  |
| 3149    | 3162.5  | 0.723776 | -0.554252441 | 0.720303  |
| 3666.57 | 3498.57 | 0.797318 | -0.418676461 | 0.833248  |
| 1139.5  | 1222.5  | 0.857944 | -0.289999065 | 0.802693  |
| 1366    | 1325.5  | 0.600038 | -0.768283342 | 0.625262  |
| 2141.68 | 2202.6  | 0.783711 | -0.528241144 | 0.76453   |
| 1114.5  | 1238.5  | 0.831252 | -0.374827072 | 0.752691  |
| 2274.5  | 1913    | 0.837809 | -0.261829756 | 0.99305   |
| 1605.5  | 1342    | 0.51368  | -0.632695112 | 0.717814  |
| 52      | 36.5    | 0.416808 | -1.893084796 | 0.616838  |
| 476     | 533     | 0.978227 | -0.054036693 | 0.907612  |
| 776.492 | 702.502 | 0.65069  | -0.526696494 | 0.752824  |
| 1891.5  | 1591    | 0.606913 | -1.059561228 | 0.717358  |
| 45.5    | 54.5    | 0.95301  | 0.12156198   | 0.941292  |
| 3571.57 | 3974.55 | 0.614013 | -0.765805007 | 0.526446  |
| 213     | 187     | 0.724906 | -0.463246592 | 0.843751  |
| 378     | 407     | 0.893521 | -0.189377364 | 0.828422  |
| 1750    | 1647    | 0.674591 | -0.607604065 | 0.726515  |
| 761.507 | 885.989 | 0.832231 | -0.37795171  | 0.71945   |
| 4174    | 3989    | 0.750616 | -0.548698037 | 0.784101  |
| 3496.01 | 3564.49 | 0.814103 | -0.376762967 | 0.798769  |
| 230     | 242.5   | 1        | 0            | 0.963672  |
| 5050    | 5009    | 0.654332 | -0.535331733 | 0.662514  |
| 450.001 | 470.002 | 0.964131 | -0.07908155  | 0.934323  |
| 310.5   | 241     | 0.786962 | 0.440939363  | 0.663837  |
| 13.5    | 14.5    | 0.720999 | -0.847996907 | 0.678239  |
| 0.5     | 0.5     | 0.450185 | #NUM!        | 0.450185  |
| 384     | 359.5   | 0.908039 | 0.17990909   | 0.864423  |
| 78.5    | 100     | 0.489733 | -0.740031897 | 0.27828   |
| 1       | 0.5     | 0.651448 | -1           | 1         |
| 8587    | 6666.5  | 0.340636 | -1.048347748 | 0.567294  |
| 719.502 | 699.005 | 0.900917 | -0.2019842   | 0.9224    |
| 2.5     | 4       | 0.234161 | #NUM!        | 0.0979398 |
| 22.5    | 32      | 0.99008  | 0.03170886   | 0.823741  |
| 0       | 0       | ?        | #DIV/0!      | ?         |
| 41      | 35      | 0.605665 | -0.713695815 | 0.74318   |
| 3881.9  | 3298.76 | 0.663023 | -0.726258642 | 0.784662  |
| 258     | 294     | 0.966694 | -0.089386318 | 0.889842  |
| 538.497 | 796.995 | 0.775427 | -0.764450916 | 0.547351  |
| 1072    | 1158    | 0.915173 | -0.215902353 | 0.866799  |
| 206.966 | 206.343 | 0.842568 | -0.199946896 | 0.846157  |
| 273     | 241.5   | 0.82005  | -0.392317423 | 0.906333  |
| 2166.02 | 1348.49 | 0.396182 | -1.419058094 | 0.721134  |
| 620.5   | 634.995 | 0.427232 | -2.153166088 | 0.415003  |
| 86      | 48      | 0.622031 | -0.725825037 | 0.952679  |
| 54.1105 | 156     | 0.394094 | 1.860548835  | 0.796062  |
| 147.5   | 56.5    | 0.739149 | 0.326810316  | 0.299412  |
| 820.997 | 630.5   | 0.335001 | -1.23829379  | 0.542897  |

|          |          |           |              |           |
|----------|----------|-----------|--------------|-----------|
| 102.144  | 108.5    | 0.898038  | 0.220357112  | 0.936319  |
| 135.89   | 281.5    | 0.712349  | 0.607191474  | 0.699645  |
| 72       | 75       | 0.114624  | -1.103835811 | 0.0978886 |
| 0        | 0        | ?         | #DIV/0!      | ?         |
| 272.5    | 279.001  | 0.938421  | -0.104270483 | 0.917456  |
| 3        | 0.5      | 0.393741  | -2.584962501 | 1         |
| 28       | 46       | 0.876869  | -0.415037499 | 0.589637  |
| 0.5      | 3        | 0.741917  | 1.584962501  | 0.625646  |
| 5.5      | 4        | 0.641229  | -0.652076697 | 0.905448  |
| 26.5     | 156.5    | 0.263946  | 3.324647596  | 0.576138  |
| 278      | 313.999  | 0.91734   | -0.188197822 | 0.831348  |
| 2        | 0.5      | 0.0162766 | #NUM!        | 0.308068  |
| 15       | 20       | 0.594988  | 1.023846742  | 0.714859  |
| 11527    | 13048.5  | 0.92214   | -0.158665729 | 0.825261  |
| 406      | 365.5    | 0.780245  | -0.352452962 | 0.87967   |
| 628.5    | 602.5    | 0.861772  | -0.290144385 | 0.89282   |
| 5122.63  | 2878.05  | 0.96439   | 0.069597457  | 0.665221  |
| 5154.98  | 1104     | 0.905709  | 0.178241564  | 0.435329  |
| 4329.5   | 2702.5   | 0.982121  | -0.035419824 | 0.747703  |
| 1        | 3.5      | 0.758682  | #NUM!        | 0.323864  |
| 466.5    | 472      | 0.604936  | -0.587283813 | 0.592918  |
| 23.5     | 42.5     | 0.990879  | -0.031026896 | 0.661561  |
| 4        | 6        | 0.329316  | -2           | 0.14822   |
| 4111     | 3646.5   | 0.546991  | -0.79673445  | 0.65354   |
| 73.5     | 66       | 0.933338  | -0.122856748 | 0.983306  |
| 910.5    | 1401.5   | 0.932488  | -0.199338151 | 0.66627   |
| 141      | 102      | 0.19376   | -1           | 0.510007  |
| 29.5     | 21       | 0.884657  | 0.204819792  | 0.67951   |
| 514.5    | 704      | 0.496007  | -1.783025593 | 0.32517   |
| 1102.5   | 1414.5   | 0.668421  | -0.672977499 | 0.466309  |
| 13.5     | 24       | 0.888201  | 0.332575339  | 0.779785  |
| 641      | 573.5    | 0.814615  | -0.328413396 | 0.909515  |
| 480      | 861.012  | 0.987213  | -0.041154232 | 0.646194  |
| 82       | 78       | 0.754868  | -0.512061954 | 0.793342  |
| 1424.69  | 1034.12  | 0.330408  | -0.896303799 | 0.66896   |
| 535      | 523.5    | 0.899551  | -0.185344169 | 0.917349  |
| 568      | 582.5    | 0.960484  | 0.080273316  | 0.978104  |
| 808.496  | 631.998  | 0.734114  | 0.432325337  | 0.587508  |
| 681      | 674.5    | 0.929402  | 0.144995067  | 0.923058  |
| 40       | 47.5     | 0.95539   | -0.093109404 | 0.823714  |
| 1331.5   | 1219.5   | 0.721583  | -0.475703516 | 0.801688  |
| 370      | 369.5    | 0.728323  | -0.514573173 | 0.729472  |
| 1990.5   | 2187.5   | 0.969718  | -0.055786479 | 0.891197  |
| 624      | 690.5    | 0.871066  | -0.228764504 | 0.780327  |
| 1871.5   | 1968     | 0.82198   | -0.401864447 | 0.785538  |
| 506      | 458.5    | 0.443182  | -0.861460057 | 0.535923  |
| 2133.03  | 1918.99  | 0.629734  | -0.538050219 | 0.740961  |
| 7237.49  | 6598.91  | 0.622441  | -0.553179173 | 0.718946  |
| 2163.01  | 1850.01  | 0.79676   | -0.312295711 | 0.947008  |
| 43.5     | 35.5     | 0.882311  | 0.186413124  | 0.732125  |
| 1112     | 1410.5   | 0.739388  | -0.336761879 | 0.464786  |
| 1477     | 1414.5   | 0.765155  | -0.402394995 | 0.804563  |
| 7972.5   | 9097     | 0.943154  | -0.122400401 | 0.845906  |
| 6.53E-17 | 2.12E-11 | ?         | #NUM!        | ?         |
| 1239     | 1126.5   | 0.653514  | -0.627502046 | 0.736743  |
| 360      | 346      | 0.851592  | -0.309458743 | 0.881095  |

|         |         |          |              |           |
|---------|---------|----------|--------------|-----------|
| 1998    | 2029    | 0.827475 | -0.354700393 | 0.815528  |
| 375.5   | 556.001 | 0.770605 | -0.697800714 | 0.524086  |
| 7016.22 | 6728.43 | 0.649642 | -0.683400786 | 0.684391  |
| 22972.7 | 25446.1 | 0.988647 | 0.024749653  | 0.940792  |
| 4600.37 | 4548.42 | 0.683788 | -0.635991891 | 0.693007  |
| 735.5   | 1056    | 0.987197 | 0.036795559  | 0.800194  |
| 3049    | 3556    | 0.983028 | 0.037826507  | 0.91102   |
| 281     | 325.5   | 0.804692 | -0.516040818 | 0.707919  |
| 610.5   | 728.5   | 0.779154 | -0.701178387 | 0.676394  |
| 1117.5  | 1082.5  | 0.707771 | -0.740196715 | 0.729131  |
| 346     | 344.5   | 0.913262 | 0.185591598  | 0.910541  |
| 1       | 0.5     | 1        | 0            | 0.710482  |
| 745.996 | 732.5   | 0.952533 | 0.108924526  | 0.941611  |
| 630.5   | 670     | 0.497548 | -2.028889532 | 0.4657    |
| 35.5    | 49      | 0.604851 | -0.864344901 | 0.36599   |
| 2495.44 | 2756.61 | 0.896871 | -0.239312015 | 0.827639  |
| 7.5     | 12.5    | 0.624453 | -1.906890596 | 0.375602  |
| 23      | 20.5    | 0.927796 | 0.120294234  | 0.838941  |
| 22.5    | 18      | 0.821261 | -0.321928095 | 1         |
| 2373    | 2287.5  | 0.851019 | -0.263034406 | 0.882812  |
| 50951.6 | 61223.1 | 0.874318 | 0.324033195  | 0.974772  |
| 26      | 26.5    | 0.9774   | -0.056583528 | 0.966108  |
| 839.5   | 779.5   | 0.679001 | -0.552254632 | 0.746771  |
| 1313.5  | 1293.5  | 0.805261 | -0.463625203 | 0.815739  |
| 3938    | 4151    | 0.854103 | -0.321882302 | 0.815633  |
| 7202    | 6402.5  | 0.705053 | -0.600318231 | 0.797211  |
| 129     | 686.5   | 0.966174 | -0.290128067 | 0.337713  |
| 5488.81 | 6823.5  | 0.927829 | -0.181635399 | 0.783324  |
| 1878.5  | 2313    | 0.941282 | 0.144225328  | 0.929583  |
| 113.5   | 134     | 0.68322  | -0.739085646 | 0.560455  |
| 107     | 69.5    | 0.412165 | -1.474680446 | 0.696237  |
| 237.66  | 279.317 | 0.909466 | 0.211408355  | 0.989947  |
| 7       | 5.5     | 0.717963 | -0.637429921 | 0.883931  |
| 1881.99 | 1877.06 | 0.82579  | -0.432035208 | 0.82751   |
| 1256    | 1473    | 0.829078 | -0.472049918 | 0.72853   |
| 802.5   | 735.5   | 0.694453 | -0.459768736 | 0.783541  |
| 112     | 123     | 0.778084 | -0.458626768 | 0.703167  |
| 0.5     | 1.5     | 0.724378 | #NUM!        | 0.329316  |
| 852     | 569     | 0.495648 | -0.584962501 | 0.997998  |
| 30.5    | 19.5    | 0.561234 | 1.091630475  | 0.453452  |
| 0       | 0       | 0.308068 | #DIV/0!      | 0.308068  |
| 1518.13 | 2039.35 | 0.652067 | -0.971045744 | 0.458377  |
| 739.369 | 795.88  | 0.349556 | -1.691564488 | 0.306966  |
| 3.00509 | 11.7346 | 0.896028 | -0.260629272 | 0.0777112 |
| 46      | 41      | 1        | 0            | 0.923088  |
| 4348.86 | 2971.83 | 0.502958 | -0.974392625 | 0.804928  |
| 1.5     | 2       | 0.604181 | -1.584962501 | 0.450185  |
| 23.5    | 17.7808 | 0.873462 | -0.197036847 | 0.885169  |
| 100.5   | 107.5   | 0.892625 | -0.199840579 | 0.835871  |
| 1334.5  | 1497    | 0.977644 | -0.052847848 | 0.902327  |
| 1002    | 967.002 | 0.764459 | -0.544498404 | 0.789613  |
| 1811    | 1900.5  | 0.783228 | -0.4699756   | 0.746597  |
| 40.126  | 50.1046 | 0.86555  | -0.300130129 | 0.697347  |
| 44.5    | 44.5    | 0.391851 | -1.775293713 | 0.391851  |
| 1167.28 | 1284.67 | 0.866631 | -0.314677438 | 0.800072  |
| 5.5     | 4       | 0.455759 | -1.137503524 | 0.698091  |

|         |         |          |              |           |
|---------|---------|----------|--------------|-----------|
| 522     | 566.998 | 0.965256 | -0.08685839  | 0.914216  |
| 42.8617 | 73.3489 | 0.815631 | -0.563636172 | 0.475298  |
| 102     | 100     | 0.845823 | -0.415037499 | 0.857705  |
| 796.5   | 687.5   | 0.770202 | -0.563389089 | 0.865503  |
| 886     | 923     | 0.953823 | -0.115205856 | 0.928784  |
| 3135.07 | 3101.44 | 0.740619 | -0.713400042 | 0.747369  |
| 436.512 | 564.445 | 0.91331  | -0.232348463 | 0.748546  |
| 355.216 | 387.333 | 0.881188 | -0.305280142 | 0.826045  |
| 3542.5  | 3951    | 0.948811 | 0.118403339  | 0.98216   |
| 1351.5  | 1195.5  | 0.431834 | -0.763721176 | 0.56124   |
| 658.381 | 575.618 | 0.79453  | -0.449446638 | 0.889633  |
| 162.995 | 165.298 | 0.278059 | -1.311246764 | 0.269032  |
| 293.5   | 308.5   | 0.860621 | -0.188788071 | 0.804122  |
| 614     | 567     | 0.775844 | -0.350702858 | 0.853571  |
| 6402.13 | 7032.06 | 0.885038 | 0.289544311  | 0.935691  |
| 1142.5  | 1459    | 0.800793 | 0.518860157  | 0.92725   |
| 2613    | 3328    | 0.54019  | 1.372809264  | 0.6082    |
| 1045    | 937     | 0.724724 | -0.466090955 | 0.824388  |
| 4       | 5.5     | 0.628487 | -1.415037499 | 0.453341  |
| 515     | 602     | 0.70611  | -0.765254639 | 0.599552  |
| 635.5   | 397.5   | 0.471425 | -1.281081179 | 0.784573  |
| 4734    | 5161    | 0.674163 | -0.960619901 | 0.620478  |
| 1296.41 | 1138.13 | 0.677047 | -0.764844618 | 0.76773   |
| 242     | 231     | 0.574019 | -0.863580802 | 0.611284  |
| 710.5   | 869     | 0.735393 | -0.591576879 | 0.581027  |
| 681.5   | 632     | 0.481122 | -2.127167628 | 0.520033  |
| 4       | 9.5     | 0.88504  | 0.459431619  | 0.703202  |
| 1436    | 1190    | 0.578478 | -1.30419969  | 0.688182  |
| 314.5   | 316     | 0.910503 | 0.182864057  | 0.913642  |
| 329.5   | 383.5   | 0.936908 | -0.169377801 | 0.84487   |
| 1205    | 1031.5  | 0.811078 | -0.41863375  | 0.918087  |
| 1934.52 | 1794.48 | 0.58034  | -1.419910087 | 0.622724  |
| 2693.5  | 3512.5  | 0.979059 | -0.058480874 | 0.821147  |
| 4069.32 | 5016.84 | 0.672346 | -0.695675622 | 0.507103  |
| 0       | 0       | ?        | #DIV/0!      | ?         |
| 9735.48 | 9926.06 | 0.578667 | -0.662832266 | 0.559854  |
| 231     | 215     | 0.615503 | -0.380073827 | 0.721617  |
| 218.5   | 192     | 0.754353 | -0.562036104 | 0.844299  |
| 3       | 1       | 0.391002 | -1.584962501 | 1         |
| 1625.5  | 724     | 0.16199  | -1.496742839 | 0.811413  |
| 2.5     | 19      | 0.727013 | 1.847996907  | 0.596819  |
| 11.5    | 6       | 0.881896 | 0.176877762  | 0.505581  |
| 9558.5  | 12337.6 | 0.85764  | -0.341733794 | 0.673912  |
| 303.5   | 450.5   | 0.242839 | -1.308914767 | 0.0784391 |
| 1515    | 1511.51 | 0.935714 | -0.156262866 | 0.937152  |
| 228     | 354     | 0.66829  | -1.317190176 | 0.429803  |
| 0       | 0       | ?        | #DIV/0!      | ?         |
| 38232.8 | 35551.5 | 0.281408 | -0.729018002 | 0.359764  |
| 573.5   | 544     | 0.758298 | -0.36923381  | 0.81151   |
| 45      | 38.5    | 0.911028 | -0.206450877 | 0.992562  |
| 2274.5  | 2174.51 | 0.731889 | -0.511522742 | 0.769493  |
| 303     | 369     | 0.950955 | -0.129431817 | 0.828404  |
| 1111.5  | 1255    | 0.858701 | -0.363404731 | 0.779479  |
| 17643.3 | 17487.8 | 0.77063  | -0.417773941 | 0.778335  |
| 3031.51 | 3202.01 | 0.817603 | -0.333669795 | 0.769872  |
| 1246    | 1345    | 0.724292 | -0.355310391 | 0.633793  |

|         |         |          |              |          |
|---------|---------|----------|--------------|----------|
| 915.5   | 916.5   | 0.793314 | -0.375913803 | 0.792365 |
| 1515    | 1435.5  | 0.717579 | -0.407123628 | 0.774999 |
| 2545    | 2280.5  | 0.719006 | -0.486504291 | 0.817445 |
| 3928.5  | 3680.5  | 0.816558 | -0.369432744 | 0.866927 |
| 147     | 130.5   | 0.82195  | -0.317029295 | 0.922425 |
| 959     | 981.5   | 0.868511 | -0.237388469 | 0.848537 |
| 0.5     | 1       | 0.481309 | 2            | 0.630057 |
| 185.5   | 133.5   | 0.632495 | -0.827916245 | 0.861473 |
| 3       | 3       | 0.764931 | -0.584962501 | 0.764931 |
| 3613.58 | 2400.98 | 0.913364 | 0.151805854  | 0.666747 |
| 219.5   | 176     | 0.424359 | -0.835562624 | 0.647327 |
| 4093.42 | 4070.35 | 0.757334 | -0.467714398 | 0.762039 |
| 454     | 369.5   | 0.545481 | -1.129580961 | 0.685399 |
| 13.5    | 15.5    | 0.882296 | -0.295455884 | 0.790796 |
| 561.001 | 700.002 | 0.901319 | 0.2420866    | 0.964731 |
| 2149.53 | 2928    | 0.719549 | -0.79251813  | 0.516838 |
| 3826.5  | 3738.5  | 0.811067 | -0.338851815 | 0.831306 |
| 5917.55 | 7001.71 | 0.790398 | -0.513662695 | 0.671638 |
| 1255    | 593     | 0.852422 | 0.257275137  | 0.507726 |
| 4449.47 | 4316.51 | 0.779657 | -0.404781589 | 0.805673 |
| 1760    | 1389.48 | 0.983513 | 0.034799963  | 0.842969 |
| 3480    | 3043    | 0.930802 | -0.155461966 | 0.984106 |
| 28.0079 | 16.0016 | 0.536203 | -0.999582827 | 0.927244 |
| 1869.49 | 1912.01 | 0.892744 | -0.250052714 | 0.877592 |
| 14145.3 | 13482.7 | 0.827621 | -0.358013907 | 0.863726 |
| 2882.01 | 2894    | 0.741062 | -0.59729949  | 0.738065 |
| 10.5    | 8.5     | 0.191883 | -1.392317423 | 0.329316 |
| 831.495 | 1095.51 | 0.924951 | -0.2117358   | 0.756026 |
| 12666   | 12378.5 | 0.750758 | -0.433301157 | 0.771579 |
| 3976.34 | 4003.65 | 0.678023 | -0.646589904 | 0.672445 |
| 144     | 155.5   | 0.900199 | 0.192018772  | 0.956039 |
| 531.5   | 466     | 0.862781 | -0.285741557 | 0.95659  |
| 987     | 1106    | 0.901075 | -0.224098743 | 0.819893 |
| 1918.55 | 1482.02 | 0.49026  | -1.938577272 | 0.6251   |
| 170.5   | 160     | 0.523202 | -1.699382411 | 0.558351 |
| 501     | 480     | 0.868648 | -0.269962126 | 0.900605 |
| 2810.5  | 2462    | 0.369344 | -0.698804427 | 0.527062 |
| 474.5   | 390.5   | 0.49195  | -1.745606034 | 0.600397 |
| 1813.5  | 1859.46 | 0.839517 | -0.350348093 | 0.821124 |
| 1700.99 | 1753.49 | 0.837468 | -0.318012838 | 0.812796 |
| 1004.5  | 1163    | 0.572318 | -0.592883482 | 0.421951 |
| 47      | 58      | 0.981843 | -0.046794211 | 0.850075 |
| 58      | 79.5    | 0.889817 | -0.288125387 | 0.677384 |
| 70      | 170     | 0.781789 | -0.771731012 | 0.270647 |
| 4       | 22.5    | 0.899005 | 0.700439718  | 0.44226  |
| 55      | 33.5    | 0.859098 | -0.226770862 | 0.765751 |
| 2.5     | 2.5     | 0.770719 | -0.736965594 | 0.770719 |
| 63      | 110     | 0.981834 | -0.058416686 | 0.658129 |
| 96.5    | 80.5    | 0.658634 | 0.626711483  | 0.569142 |
| 0       | 16      | 0.965415 | #DIV/0!      | 0.24061  |
| 447.5   | 605     | 0.688068 | 0.773572065  | 0.837852 |
| 141     | 121     | 0.449718 | -1.510194732 | 0.546657 |
| 277     | 218.5   | 0.815135 | -0.375649906 | 0.985236 |
| 16      | 8       | 0.295498 | -3           | 0.625646 |
| 0.5     | 1.33633 | 0.748476 | 1            | 0.828333 |
| 0.5     | 0.66367 | 0.382251 | 2.807354922  | 0.405444 |

|         |         |          |              |           |
|---------|---------|----------|--------------|-----------|
| 12.5    | 8       | 0.927055 | -0.184424571 | 0.855059  |
| 50.5    | 29.5    | 0.522246 | 1.272525855  | 0.418925  |
| 3.5     | 3.5     | 0.587095 | -1.807354922 | 0.587095  |
| 172     | 216.5   | 0.731092 | -0.281606512 | 0.422004  |
| 1244    | 1282    | 0.92426  | -0.187987206 | 0.905446  |
| 18      | 7       | 0.480862 | -0.847996907 | 0.783067  |
| 0       | 0       | ?        | #DIV/0!      | ?         |
| 0       | 0       | ?        | #DIV/0!      | ?         |
| 0.5     | 0       | 0.308068 | #NUM!        | 1         |
| 0       | 0       | ?        | #DIV/0!      | ?         |
| 1.5     | 0       | 0.308068 | #NUM!        | 1         |
| 1899.5  | 2195    | 0.7226   | -0.60889469  | 0.610866  |
| 3.5     | 4       | 0.871602 | 0.362570079  | 0.935472  |
| 0       | 2       | 1        | #DIV/0!      | 0.308068  |
| 0       | 2.5     | 0.450185 | #DIV/0!      | 0.0405193 |
| 126     | 396.5   | 0.690532 | -0.932885804 | 0.0944501 |
| 0       | 0.8429  | 0.418121 | #DIV/0!      | 0.892367  |
| 0.5     | 1.6571  | 0.7469   | -51.78949662 | 0.325618  |
| 0       | 0       | ?        | #DIV/0!      | ?         |
| 0       | 0       | ?        | #DIV/0!      | ?         |
| 475     | 536.5   | 0.98231  | 0.038953634  | 0.934114  |
| 3147    | 3092    | 0.617829 | -0.579814303 | 0.635713  |
| 1795.5  | 1734    | 0.636442 | -0.485426827 | 0.675971  |
| 720.502 | 713.496 | 0.892084 | -0.214413813 | 0.899617  |
| 1304.5  | 1139    | 0.750125 | -0.349281229 | 0.895284  |
| 1806    | 1801    | 0.850356 | -0.268316371 | 0.852753  |
| 3636.5  | 4701    | 0.946521 | -0.129196236 | 0.768764  |
| 520.5   | 523     | 0.847926 | -0.387129733 | 0.844883  |
| 1091    | 1321    | 0.82058  | -0.385802999 | 0.670647  |
| 228.5   | 252     | 0.961555 | 0.085790582  | 0.973903  |
| 287.5   | 326     | 0.770138 | -0.624386326 | 0.688656  |
| 25.5    | 38.5    | 0.640505 | -1.502500341 | 0.423037  |
| 2054    | 2207.5  | 0.933268 | -0.149741632 | 0.88313   |
| 344     | 362     | 0.735966 | 0.546715031  | 0.764489  |
| 257     | 366.5   | 0.877064 | -0.25408049  | 0.583613  |
| 3306.5  | 2793.5  | 0.887188 | 0.182931581  | 0.762193  |
| 1234    | 1203.5  | 0.961612 | 0.085673665  | 0.946136  |
| 899.5   | 743.5   | 0.554013 | -1.393019293 | 0.665177  |
| 568.5   | 668.5   | 0.682632 | -0.893628696 | 0.577591  |
| 31.5    | 29.5    | 0.938211 | -0.144389909 | 0.979375  |
| 575.5   | 774.5   | 0.998869 | 0.00250468   | 0.780532  |
| 319     | 221.5   | 0.574935 | -1.032010395 | 0.817254  |
| 4.5     | 6.5     | 0.513713 | -1.584962501 | 0.306059  |
| 61      | 58.5    | 0.697826 | -0.626956589 | 0.730715  |
| 3       | 4.5     | 0.84541  | -0.584962501 | 0.632221  |
| 114     | 114     | 0.572372 | -0.673018677 | 0.572372  |
| 184.5   | 242.5   | 0.832851 | -0.527477006 | 0.672839  |
| 535     | 551     | 0.899345 | -0.233672346 | 0.879435  |
| 7984.93 | 7802.59 | 0.317498 | -2.799414369 | 0.328433  |
| 186631  | 187303  | 0.736375 | -0.343411011 | 0.732158  |
| 1726    | 1969    | 0.997701 | -0.00586292  | 0.918121  |
| 497     | 478     | 0.733131 | -0.391048003 | 0.774119  |
| 1890.52 | 1920.49 | 0.778663 | -0.503024445 | 0.767265  |
| 6938.98 | 6900.39 | 0.539172 | -0.914147783 | 0.543667  |
| 2607.53 | 2687.9  | 0.764219 | -0.481946469 | 0.739995  |
| 564.5   | 579     | 0.573209 | -0.735688308 | 0.550327  |

|         |         |           |              |           |
|---------|---------|-----------|--------------|-----------|
| 335     | 447     | 0.845241  | 0.343301746  | 0.961814  |
| 7       | 5.5     | 0.399441  | -2.807354922 | 0.515664  |
| 156.5   | 213     | 0.869956  | -0.377129511 | 0.678252  |
| 381.5   | 368.5   | 0.656656  | -0.723790205 | 0.683733  |
| 318     | 410.5   | 0.821423  | -0.548011365 | 0.668645  |
| 1291    | 1144.5  | 0.911581  | -0.138285987 | 0.978579  |
| 13560.5 | 5344.49 | 0.829278  | -0.297062292 | 0.632645  |
| 14352   | 7127.5  | 0.531626  | -0.89243155  | 0.952764  |
| 0       | 0       | 0.308068  | #DIV/0!      | 0.308068  |
| 8.5     | 1       | 0.486955  | -1.410306436 | 0.764668  |
| 12      | 5.5     | 0.967052  | -0.061400545 | 0.627871  |
| 489.5   | 431.5   | 0.709996  | -0.473685602 | 0.828742  |
| 3533.5  | 3372.5  | 0.823965  | -0.377226081 | 0.858177  |
| 2398    | 2362    | 0.765042  | -0.563168659 | 0.77549   |
| 1059.5  | 969     | 0.378328  | -0.718250994 | 0.478942  |
| 61.5    | 76.5    | 0.454104  | -1.855051664 | 0.334619  |
| 950.5   | 790.5   | 0.849842  | -0.3047653   | 0.982417  |
| 248.021 | 229.259 | 0.564853  | -0.629004018 | 0.647116  |
| 2256.5  | 2132    | 0.623281  | -0.635548615 | 0.676081  |
| 4426    | 4961.5  | 0.561247  | -0.589206205 | 0.440673  |
| 185.5   | 118     | 0.207629  | 1.106776316  | 0.1258    |
| 1404    | 1085    | 0.852299  | -0.242830835 | 0.930583  |
| 6600.5  | 7074    | 0.900869  | -0.240630613 | 0.855252  |
| 545.5   | 503.5   | 0.775702  | -0.452999472 | 0.838131  |
| 1.99199 | 2.00152 | 0.288632  | -1.380301626 | 0.285596  |
| 97.008  | 775.499 | 0.705864  | -2.191673207 | 0.0256918 |
| 0.5     | 3       | 1         | 0            | 0.393741  |
| 3412.5  | 3223.5  | 0.517927  | -0.738022901 | 0.573683  |
| 912.5   | 852     | 0.739897  | -0.481637323 | 0.79831   |
| 626     | 617     | 0.879744  | -0.267651034 | 0.889848  |
| 1352    | 1412.5  | 0.88373   | -0.285185484 | 0.855174  |
| 409.279 | 436.93  | 0.905643  | -0.208948172 | 0.859011  |
| 2       | 1.5     | 0.593125  | 0.807354922  | 0.484842  |
| 107     | 133     | 0.61005   | -0.858823937 | 0.446009  |
| 231     | 223.5   | 0.0986374 | -1.7642862   | 0.108974  |
| 361     | 408     | 0.953082  | -0.101392332 | 0.863999  |
| 2980.5  | 3156    | 0.855914  | -0.253914846 | 0.80478   |
| 1.5     | 0.5     | 0.329316  | #NUM!        | 0.724378  |
| 0.5     | 1       | 0.559404  | 1.584962501  | 0.764931  |
| 6515.5  | 7457    | 0.897002  | -0.264784725 | 0.810276  |
| 468     | 472.5   | 0.917035  | 0.150615219  | 0.924248  |
| 4       | 2.5     | 0.753462  | -0.678071905 | 1         |
| 28.5    | 35      | 0.709146  | -0.584962501 | 0.53924   |
| 70      | 33      | 0.447993  | -1.574694165 | 0.870148  |
| 57.5    | 58      | 0.665869  | 0.73947245   | 0.669811  |
| 392.911 | 369.346 | 0.783394  | -0.422578266 | 0.833205  |
| 2533.16 | 2303.77 | 0.194073  | -0.885741202 | 0.273245  |
| 17.5    | 8.5     | 0.524625  | -0.605721061 | 0.743377  |
| 238.5   | 274.5   | 0.652718  | -1.009102207 | 0.563518  |
| 804     | 760.5   | 0.326696  | -1.508944634 | 0.362337  |
| 1115    | 1080    | 0.736732  | -0.581731379 | 0.760391  |
| 467.459 | 500.945 | 0.862996  | -0.28373728  | 0.809445  |
| 15.5    | 56      | 0.865855  | -1.146841388 | 0.366989  |
| 2069.61 | 2331.87 | 0.679299  | -0.826665635 | 0.597489  |
| 21.5    | 12.5    | 0.654586  | 0.527931556  | 0.406182  |
| 5.5     | 38      | 0.868287  | -1.137503524 | 0.122366  |

|         |         |          |              |           |
|---------|---------|----------|--------------|-----------|
| 25769.7 | 24201.4 | 0.488064 | -0.893780767 | 0.542839  |
| 20.5    | 17.5    | 0.521868 | -1.450661409 | 0.616824  |
| 1219.5  | 1275    | 0.813381 | -0.415234683 | 0.780673  |
| 325.054 | 343.394 | 0.901068 | 0.190669782  | 0.94042   |
| 1280    | 1337.5  | 0.475545 | -1.500154113 | 0.448353  |
| 5218.97 | 8625.5  | 0.786757 | -0.680916992 | 0.477891  |
| 2.5     | 6.5     | 0.267912 | 1.485426827  | 0.889735  |
| 5638.74 | 5545.4  | 0.68084  | -0.552336695 | 0.696141  |
| 3255    | 3802.5  | 0.820033 | -0.448668277 | 0.713078  |
| 727     | 690.5   | 0.568771 | -0.50440336  | 0.63312   |
| 606     | 583.5   | 0.846028 | -0.245994503 | 0.882012  |
| 517.5   | 557.5   | 0.856333 | -0.353633392 | 0.806626  |
| 2213.5  | 2139.5  | 0.68348  | -0.591004014 | 0.712689  |
| 6.5     | 9.5     | 0.804594 | 0.469485283  | 0.960314  |
| 253.5   | 256.5   | 0.653516 | -0.551213709 | 0.641964  |
| 20.5    | 208     | 0.707951 | 1.899835838  | 0.404588  |
| 6.5     | 7.5     | 0.758139 | -0.530514717 | 0.647766  |
| 2597.7  | 2608.05 | 0.734025 | -0.490747111 | 0.730571  |
| 656     | 690.5   | 0.869761 | -0.290117644 | 0.832931  |
| 272.5   | 234.5   | 0.705721 | -0.772699806 | 0.800637  |
| 4984.62 | 4698.9  | 0.683121 | -0.616174014 | 0.731968  |
| 8236.76 | 9221.73 | 0.888536 | -0.270539944 | 0.81239   |
| 1112.5  | 1114    | 0.990125 | 0.018041977  | 0.991183  |
| 512.5   | 584.499 | 0.745416 | 0.640643499  | 0.807107  |
| 628     | 639     | 0.688048 | -0.849605903 | 0.676821  |
| 18      | 21      | 0.610316 | -1.263034406 | 0.518701  |
| 442.5   | 513.999 | 0.730309 | -0.720755367 | 0.630424  |
| 0.5     | 2.5     | 0.450185 | #NUM!        | 0.0227138 |
| 2737    | 2726.5  | 0.826685 | -0.373302667 | 0.82953   |
| 573.5   | 560     | 0.812782 | -0.392160207 | 0.830837  |
| 2505.5  | 2438.5  | 0.845623 | -0.363845654 | 0.86384   |
| 0       | 0       | ?        | #DIV/0!      | ?         |
| 0       | 0       | ?        | #DIV/0!      | ?         |
| 0       | 0       | ?        | #DIV/0!      | ?         |
| 1.5     | 1.5     | 0.513713 | -1.584962501 | 0.513713  |
| 0       | 0       | ?        | #DIV/0!      | ?         |
| 48      | 43      | 0.933003 | 0.142957954  | 0.866744  |
| 2       | 1.5     | 0.399441 | #NUM!        | 0.515664  |
| 0       | 0       | ?        | #DIV/0!      | ?         |
| 10      | 6.5     | 0.144877 | -1.514573173 | 0.432389  |
| 0.5     | 0       | 0.308068 | #NUM!        | 1         |
| 0       | 0       | ?        | #DIV/0!      | ?         |
| 0       | 0       | 0.308068 | #DIV/0!      | 0.308068  |
| 0       | 0       | ?        | #DIV/0!      | ?         |
| 0.5     | 0       | 0.622002 | 1            | 0.353387  |
| 0       | 0       | ?        | #DIV/0!      | ?         |
| 0       | 0       | ?        | #DIV/0!      | ?         |
| 0       | 0       | ?        | #DIV/0!      | ?         |
| 0.5     | 0       | 0.308068 | #NUM!        | 1         |
| 0       | 0       | ?        | #DIV/0!      | ?         |
| 0       | 0       | ?        | #DIV/0!      | ?         |
| 0       | 0       | ?        | #DIV/0!      | ?         |
| 0       | 0       | ?        | #DIV/0!      | ?         |
| 0       | 0.5     | 0.450185 | #DIV/0!      | 1         |
| 0       | 0       | ?        | #DIV/0!      | ?         |
| 0.5     | 0.5     | 0.450185 | #NUM!        | 0.450185  |



|          |          |          |              |          |
|----------|----------|----------|--------------|----------|
| 1.5      | 3.5      | 0.825659 | 0.415037499  | 0.523243 |
| 0        | 0        | 0.308068 | #DIV/0!      | 0.308068 |
| 0        | 0        | ?        | #DIV/0!      | ?        |
| 0        | 0        | ?        | #DIV/0!      | ?        |
| 0.01753  | 3.62E-10 | 0.308071 | -17.15309045 | 0.999994 |
| 0        | 0        | ?        | #DIV/0!      | ?        |
| 9.5      | 6.5      | 0.858275 | -0.341036918 | 0.928694 |
| 0        | 0        | ?        | #DIV/0!      | ?        |
| 0        | 0        | ?        | #DIV/0!      | ?        |
| 0        | 1.5      | 1        | #DIV/0!      | 0.308068 |
| 0        | 0        | ?        | #DIV/0!      | ?        |
| 0        | 0        | ?        | #DIV/0!      | ?        |
| 0.5      | 0        | 0.308068 | #NUM!        | 1        |
| 0        | 0        | ?        | #DIV/0!      | ?        |
| 0        | 2.5      | 1        | #DIV/0!      | 0.308068 |
| 0.5      | 0.5      | 0.450185 | #NUM!        | 0.450185 |
| 0        | 0        | ?        | #DIV/0!      | ?        |
| 18.5     | 6        | 0.311009 | -1.750021747 | 0.965642 |
| 0        | 0.5      | 1        | #DIV/0!      | 0.308068 |
| 2        | 1        | 0.834708 | -0.415037499 | 0.834708 |
| 0        | 0        | ?        | #DIV/0!      | ?        |
| 0        | 0        | 0.308068 | #DIV/0!      | 0.308068 |
| 0        | 0        | ?        | #DIV/0!      | ?        |
| 0        | 0        | ?        | #DIV/0!      | ?        |
| 0        | 0.5      | 1        | #DIV/0!      | 0.308068 |
| 1        | 0        | 0.308068 | #NUM!        | 1        |
| 0        | 0        | ?        | #DIV/0!      | ?        |
| 0        | 0        | 0.308068 | #DIV/0!      | 0.308068 |
| 6        | 5        | 0.308068 | -0.415037499 | 0.710482 |
| 0        | 0        | ?        | #DIV/0!      | ?        |
| 0        | 0        | ?        | #DIV/0!      | ?        |
| 0        | 0.5      | 1        | #DIV/0!      | 0.308068 |
| 0        | 0        | ?        | #DIV/0!      | ?        |
| 0        | 0        | ?        | #DIV/0!      | ?        |
| 2.5      | 3.5      | 0.613399 | -0.736965594 | 0.342872 |
| 3        | 2.5      | 0.586334 | -1.584962501 | 0.679547 |
| 8.92E-20 | 9.22E-14 | ?        | 6.220481209  | ?        |
| 0        | 0        | 0        | #DIV/0!      | 0        |
| 0        | 0        | ?        | #DIV/0!      | ?        |
| 0        | 0        | ?        | #DIV/0!      | ?        |
| 0        | 1        | 0.622002 | #DIV/0!      | 0.622002 |
| 0        | 0        | ?        | #DIV/0!      | ?        |
| 0        | 0        | ?        | #DIV/0!      | ?        |
| 0        | 0        | ?        | #DIV/0!      | ?        |
| 0        | 0        | ?        | #DIV/0!      | ?        |
| 0        | 0        | ?        | #DIV/0!      | ?        |
| 0        | 0.5      | 1        | #DIV/0!      | 0.308068 |
| 1.5      | 0        | 0.495025 | -1.584962501 | 0.724378 |
| 0        | 0        | 0.308068 | #DIV/0!      | 0.308068 |
| 0        | 0        | ?        | #DIV/0!      | ?        |
| 27.5     | 20       | 0.742481 | 0.628031223  | 0.62641  |
| 0.5      | 1        | 0.622002 | #NUM!        | 0.353387 |
| 0        | 0        | ?        | #DIV/0!      | ?        |
| 0        | 0        | ?        | #DIV/0!      | ?        |
| 0        | 1        | 1        | #DIV/0!      | 0.308068 |
| 0        | 0        | ?        | #DIV/0!      | ?        |

|          |      |           |              |           |
|----------|------|-----------|--------------|-----------|
| 0.5      | 0.5  | 0.450185  | #NUM!        | 0.450185  |
| 7        | 3.5  | 0.718549  | -0.485426827 | 0.785812  |
| 50       | 38   | 0.380823  | -1.514573173 | 0.564012  |
| 0.5      | 0    | 0.308068  | #NUM!        | 1         |
| 0        | 0    | ?         | #DIV/0!      | ?         |
| 0        | 0    | ?         | #DIV/0!      | ?         |
| 0        | 0    | ?         | #DIV/0!      | ?         |
| 0        | 0    | ?         | #DIV/0!      | ?         |
| 6        | 5    | 0.903291  | -0.263034406 | 1         |
| 0.5      | 0    | 0.308068  | #NUM!        | 1         |
| 0        | 0    | ?         | #DIV/0!      | ?         |
| 0        | 0    | ?         | #DIV/0!      | ?         |
| 0        | 1.5  | 1         | #DIV/0!      | 0.308068  |
| 0.5      | 0.5  | 0.450185  | #NUM!        | 0.450185  |
| 0        | 1    | 0.353387  | #DIV/0!      | 0.622002  |
| 2        | 1    | 0.834708  | -0.415037499 | 0.834708  |
| 2.5      | 0    | 0.0405193 | -2.321928095 | 0.450185  |
| 0        | 0    | 0.308068  | #DIV/0!      | 0.308068  |
| 2        | 1    | 0.18169   | #NUM!        | 0.450185  |
| 0.5      | 0    | 0.308068  | #NUM!        | 1         |
| 5        | 6.5  | 0.636801  | -1.321928095 | 0.489569  |
| 0        | 0    | ?         | #DIV/0!      | ?         |
| 0        | 0    | ?         | #DIV/0!      | ?         |
| 1        | 1    | 0.785812  | 0.584962501  | 0.785812  |
| 6        | 3.5  | 0.564576  | -0.777607579 | 1         |
| 0        | 0    | ?         | #DIV/0!      | ?         |
| 1.5      | 0.5  | 0.329316  | #NUM!        | 0.724378  |
| 0        | 0    | ?         | #DIV/0!      | ?         |
| 0        | 0    | ?         | #DIV/0!      | ?         |
| 0        | 3    | 1         | #DIV/0!      | 0.308068  |
| 0.5      | 0    | 1         | 0            | 0.450185  |
| 0        | 0    | ?         | #DIV/0!      | ?         |
| 0.5      | 0    | 0.308068  | #NUM!        | 1         |
| 0        | 0    | ?         | #DIV/0!      | ?         |
| 0        | 0.5  | 1         | #DIV/0!      | 0.308068  |
| 1.5      | 1.5  | 0.513713  | -1.584962501 | 0.513713  |
| 0        | 0    | ?         | #DIV/0!      | ?         |
| 0        | 0    | ?         | #DIV/0!      | ?         |
| 0        | 0.5  | 1         | #DIV/0!      | 0.308068  |
| 6        | 4    | 0.794363  | 0.415037499  | 0.608871  |
| 37       | 53.5 | 0.808661  | -0.717600269 | 0.611524  |
| 0        | 0    | ?         | #DIV/0!      | ?         |
| 0        | 0    | ?         | #DIV/0!      | ?         |
| 2.53E-16 | 0.5  | 1         | 0            | 0.308068  |
| 0.5      | 0    | 0.308068  | #NUM!        | 1         |
| 0        | 0    | ?         | #DIV/0!      | ?         |
| 0.5      | 0    | 0.308068  | #NUM!        | 1         |
| 2.5      | 1.5  | 0.0227138 | #NUM!        | 0.0805096 |
| 2        | 3.5  | 0.895809  | 0.321928095  | 0.794363  |
| 0        | 0.5  | 1         | #DIV/0!      | 0.308068  |
| 0        | 0    | ?         | #DIV/0!      | ?         |
| 6.5      | 2.5  | 0.468351  | -0.530514717 | 0.468351  |
| 7.77E-06 | 0    | 0.308071  | 16.97335135  | 0.308068  |
| 0        | 0    | ?         | #DIV/0!      | ?         |
| 0        | 0    | ?         | #DIV/0!      | ?         |
| 0        | 0    | ?         | #DIV/0!      | ?         |

|         |       |          |              |          |
|---------|-------|----------|--------------|----------|
| 3.5     | 2     | 0.514418 | -1.807354922 | 0.787312 |
| 0       | 0     | ?        | #DIV/0!      | ?        |
| 0       | 0     | ?        | #DIV/0!      | ?        |
| 1       | 0     | 0.308068 | #NUM!        | 1        |
| 0       | 0     | ?        | #DIV/0!      | ?        |
| 0       | 0     | ?        | #DIV/0!      | ?        |
| 0       | 0     | ?        | #DIV/0!      | ?        |
| 0       | 0     | ?        | #DIV/0!      | ?        |
| 0       | 0     | ?        | #DIV/0!      | ?        |
| 0       | 0     | ?        | #DIV/0!      | ?        |
| 0       | 1.5   | 0.724378 | #DIV/0!      | 0.495025 |
| 0.5     | 0     | 0.308068 | #NUM!        | 1        |
| 0.5     | 0     | 0.308068 | #NUM!        | 1        |
| 26      | 18.5  | 0.465202 | -1.056583528 | 0.735343 |
| 1       | 0.5   | 0.353387 | #NUM!        | 0.622002 |
| 0.5     | 0.5   | 0.513713 | 1.584962501  | 0.513713 |
| 0       | 0     | ?        | #DIV/0!      | ?        |
| 10      | 11    | 0.869939 | -0.321928095 | 0.806588 |
| 0       | 0     | ?        | #DIV/0!      | ?        |
| 6       | 5     | 0.717686 | 0.736965594  | 0.653517 |
| 0.02343 | 3.25  | 0.7373   | 5.415745555  | 0.458794 |
| 1       | 0     | 0.308068 | #NUM!        | 1        |
| 0       | 0     | ?        | #DIV/0!      | ?        |
| 0       | 0     | ?        | #DIV/0!      | ?        |
| 0.5     | 1     | 0.622002 | #NUM!        | 0.353387 |
| 0       | 0     | ?        | #DIV/0!      | ?        |
| 0       | 0     | ?        | #DIV/0!      | ?        |
| 0.5     | 0     | 0.308068 | #NUM!        | 1        |
| 0       | 1     | 1        | #DIV/0!      | 0.308068 |
| 0       | 0     | ?        | #DIV/0!      | ?        |
| 2.5     | 2     | 0.622002 | -1.321928095 | 0.739226 |
| 57.5    | 56.5  | 0.883379 | -0.30633124  | 0.893878 |
| 0       | 0     | ?        | #DIV/0!      | ?        |
| 0       | 0     | ?        | #DIV/0!      | ?        |
| 27      | 39.5  | 0.914592 | -0.231325546 | 0.663603 |
| 0       | 0     | ?        | #DIV/0!      | ?        |
| 97.5    | 101.5 | 0.976408 | 0.043721377  | 0.992134 |
| 33.5    | 36.5  | 0.96004  | 0.103835811  | 0.992003 |
| 0       | 0     | ?        | #DIV/0!      | ?        |
| 0       | 0     | ?        | #DIV/0!      | ?        |
| 0       | 0     | ?        | #DIV/0!      | ?        |
| 0       | 0     | ?        | #DIV/0!      | ?        |
| 0       | 0.5   | 0.450185 | #DIV/0!      | 1        |
| 0       | 0     | ?        | #DIV/0!      | ?        |
| 0.5     | 1.5   | 0.724378 | #NUM!        | 0.329316 |
| 0       | 0     | ?        | #DIV/0!      | ?        |
| 0       | 0     | 0.308068 | #DIV/0!      | 0.308068 |
| 0       | 0     | ?        | #DIV/0!      | ?        |
| 0       | 0     | ?        | #DIV/0!      | ?        |
| 0       | 0     | ?        | #DIV/0!      | ?        |
| 0       | 0     | ?        | #DIV/0!      | ?        |
| 0       | 0.5   | 1        | #DIV/0!      | 0.308068 |
| 0       | 0     | ?        | #DIV/0!      | ?        |
| 0.5     | 0.5   | 1        | 0            | 1        |
| 1       | 0     | 0.308068 | #NUM!        | 1        |
| 0       | 0     | ?        | #DIV/0!      | ?        |

|      |      |          |              |          |
|------|------|----------|--------------|----------|
| 0.5  | 0    | 0.308068 | #NUM!        | 1        |
| 3.5  | 3.5  | 0.852817 | 0.362570079  | 0.852817 |
| 0.5  | 2    | 0.710482 | 1            | 0.474021 |
| 0    | 0    | ?        | #DIV/0!      | ?        |
| 0    | 0.5  | 1        | #DIV/0!      | 0.308068 |
| 0    | 0    | ?        | #DIV/0!      | ?        |
| 1.5  | 0.5  | 0.329316 | #NUM!        | 0.724378 |
| 0.5  | 0    | 1        | 0            | 0.450185 |
| 0    | 0    | ?        | #DIV/0!      | ?        |
| 2.5  | 3.5  | 0.729943 | 0.678071905  | 0.907467 |
| 18.5 | 25.5 | 0.958043 | -0.121990524 | 0.767441 |
| 0    | 0.25 | 1        | #DIV/0!      | 0.308068 |
| 1.5  | 1.5  | 1        | 0            | 1        |
| 1    | 0.5  | 0.630057 | 1            | 0.481309 |
| 0    | 0    | ?        | #DIV/0!      | ?        |
| 0    | 0    | ?        | #DIV/0!      | ?        |
| 1.5  | 1    | 1        | 0            | 0.764931 |
| 0    | 0    | ?        | #DIV/0!      | ?        |
| 0    | 0    | ?        | #DIV/0!      | ?        |
| 0    | 0    | ?        | #DIV/0!      | ?        |
| 0    | 0    | ?        | #DIV/0!      | ?        |
| 0    | 0    | ?        | #DIV/0!      | ?        |
| 0    | 0    | ?        | #DIV/0!      | ?        |
| 0.5  | 1    | 0.559404 | 1.584962501  | 0.764931 |
| 22.5 | 25   | 0.655078 | -1.321928095 | 0.599203 |
| 0    | 0    | 0.308068 | #DIV/0!      | 0.308068 |
| 5.5  | 0    | 0.722932 | -0.459431619 | 0.375355 |
| 0    | 0    | ?        | #DIV/0!      | ?        |
| 0    | 0    | ?        | #DIV/0!      | ?        |
| 1    | 1    | 0.450185 | #NUM!        | 0.450185 |
| 0    | 0    | ?        | #DIV/0!      | ?        |
| 0.5  | 2    | 1        | 0            | 0.450185 |
| 1    | 0    | 0.622002 | -1           | 0.622002 |
| 0    | 0.5  | 0.450185 | #DIV/0!      | 1        |
| 0    | 2    | 0.622002 | #DIV/0!      | 0.622002 |
| 0    | 0    | ?        | #DIV/0!      | ?        |
| 0    | 0    | ?        | #DIV/0!      | ?        |
| 1    | 0.5  | 0.353387 | #NUM!        | 0.622002 |
| 0    | 0    | ?        | #DIV/0!      | ?        |
| 0    | 0    | ?        | #DIV/0!      | ?        |
| 0.5  | 0    | 0.308068 | #NUM!        | 1        |
| 33   | 30.5 | 0.990336 | -0.022026306 | 0.961365 |
| 0    | 0    | ?        | #DIV/0!      | ?        |
| 0    | 0    | ?        | #DIV/0!      | ?        |
| 0    | 0    | ?        | #DIV/0!      | ?        |
| 0    | 0.5  | 0.450185 | #DIV/0!      | 1        |
| 0.5  | 0.5  | 1        | 0            | 1        |
| 0    | 0    | ?        | #DIV/0!      | ?        |
| 0    | 1    | 0.622002 | #DIV/0!      | 0.622002 |
| 160  | 158  | 0.853893 | -0.261232163 | 0.864747 |
| 0    | 0    | ?        | #DIV/0!      | ?        |
| 0.25 | 0.25 | 0.450185 | #NUM!        | 0.450185 |
| 0    | 0.5  | 1        | #DIV/0!      | 0.308068 |
| 2.5  | 4.5  | 0.370457 | 1.485426827  | 0.600305 |
| 0    | 0    | ?        | #DIV/0!      | ?        |
| 0    | 0    | 0.308068 | #DIV/0!      | 0.308068 |

|     |      |          |              |          |
|-----|------|----------|--------------|----------|
| 0   | 0    | ?        | #DIV/0!      | ?        |
| 0   | 0    | ?        | #DIV/0!      | ?        |
| 0   | 0    | ?        | #DIV/0!      | ?        |
| 0   | 0    | ?        | #DIV/0!      | ?        |
| 0.5 | 0    | 0.308068 | #NUM!        | 1        |
| 0   | 0    | ?        | #DIV/0!      | ?        |
| 2.5 | 1.5  | 0.568955 | 0.847996907  | 0.409302 |
| 0   | 0    | ?        | #DIV/0!      | ?        |
| 1.5 | 0    | 0.308068 | #NUM!        | 1        |
| 0   | 0.5  | 0.353387 | #DIV/0!      | 0.622002 |
| 0   | 0    | ?        | #DIV/0!      | ?        |
| 2.5 | 0.5  | 0.236154 | -2.321928095 | 1        |
| 0   | 0    | 0.308068 | #DIV/0!      | 0.308068 |
| 2   | 8.5  | 0.90287  | 0.584962501  | 0.518461 |
| 0   | 0    | ?        | #DIV/0!      | ?        |
| 0   | 0    | ?        | #DIV/0!      | ?        |
| 0   | 0    | ?        | #DIV/0!      | ?        |
| 0.5 | 0    | 1        | 0            | 0.450185 |
| 1.5 | 2    | 0.663808 | -1.584962501 | 0.523243 |
| 0.5 | 1.5  | 0.724378 | #NUM!        | 0.329316 |
| 0   | 0    | ?        | #DIV/0!      | ?        |
| 0   | 0    | 0.308068 | #DIV/0!      | 0.308068 |
| 0   | 0.5  | 1        | #DIV/0!      | 0.308068 |
| 0   | 0    | ?        | #DIV/0!      | ?        |
| 0   | 0.5  | 1        | #DIV/0!      | 0.308068 |
| 2.5 | 1.5  | 0.490574 | -1.321928095 | 0.810902 |
| 0   | 1    | 0.622002 | #DIV/0!      | 0.622002 |
| 0   | 0    | ?        | #DIV/0!      | ?        |
| 0   | 0.5  | 1        | #DIV/0!      | 0.308068 |
| 0   | 0    | ?        | #DIV/0!      | ?        |
| 0   | 0    | 0.308068 | #DIV/0!      | 0.308068 |
| 0   | 0    | ?        | #DIV/0!      | ?        |
| 0   | 0    | ?        | #DIV/0!      | ?        |
| 0.5 | 2.5  | 0.651448 | 1            | 0.230584 |
| 2   | 1    | 0.353387 | #NUM!        | 0.622002 |
| 0   | 0    | ?        | #DIV/0!      | ?        |
| 0   | 0    | ?        | #DIV/0!      | ?        |
| 0   | 0    | ?        | #DIV/0!      | ?        |
| 0   | 0.5  | 1        | #DIV/0!      | 0.308068 |
| 0   | 0    | ?        | #DIV/0!      | ?        |
| 0.5 | 0.5  | 0.513713 | 1.584962501  | 0.513713 |
| 0.5 | 0    | 0.308068 | #NUM!        | 1        |
| 3   | 1    | 0.513713 | -1.584962501 | 1        |
| 0   | 0    | ?        | #DIV/0!      | ?        |
| 2   | 1    | 0.785812 | -0.415037499 | 0.785812 |
| 0   | 0    | ?        | #DIV/0!      | ?        |
| 0   | 0    | ?        | #DIV/0!      | ?        |
| 0   | 0    | ?        | #DIV/0!      | ?        |
| 14  | 16.5 | 0.776924 | -0.719892081 | 0.682756 |
| 0   | 0    | ?        | #DIV/0!      | ?        |
| 2   | 0    | 0.450185 | -1           | 0.450185 |
| 0.5 | 0    | 0.622002 | 1            | 0.353387 |
| 0   | 0    | ?        | #DIV/0!      | ?        |
| 1   | 0.5  | 0.353387 | #NUM!        | 0.622002 |
| 0   | 0    | ?        | #DIV/0!      | ?        |
| 0   | 0    | ?        | #DIV/0!      | ?        |

|      |      |          |              |          |
|------|------|----------|--------------|----------|
| 0    | 0    | ?        | #DIV/0!      | ?        |
| 29.5 | 20.5 | 0.747542 | -0.490325627 | 0.984744 |
| 0    | 0    | ?        | #DIV/0!      | ?        |
| 0    | 0    | ?        | #DIV/0!      | ?        |
| 2.5  | 1.5  | 0.873517 | -0.321928095 | 0.873517 |
| 0.5  | 0    | 0.308068 | #NUM!        | 1        |
| 0    | 0    | ?        | #DIV/0!      | ?        |
| 0    | 0    | ?        | #DIV/0!      | ?        |
| 0    | 0    | ?        | #DIV/0!      | ?        |
| 0    | 0    | 0.308068 | #DIV/0!      | 0.308068 |
| 0    | 0    | ?        | #DIV/0!      | ?        |
| 27.5 | 21.5 | 0.643058 | -0.611434712 | 0.862037 |
| 0    | 0    | ?        | #DIV/0!      | ?        |
| 0    | 0    | ?        | #DIV/0!      | ?        |
| 4    | 4    | 0.937823 | 0.169925001  | 0.937823 |
| 0    | 0    | ?        | #DIV/0!      | ?        |
| 0    | 0    | ?        | #DIV/0!      | ?        |
| 0    | 0    | ?        | #DIV/0!      | ?        |
| 4    | 4    | 0.411079 | -3           | 0.411079 |
| 0    | 0    | ?        | #DIV/0!      | ?        |
| 0    | 0    | ?        | #DIV/0!      | ?        |
| 0    | 0    | ?        | #DIV/0!      | ?        |
| 0    | 0    | 0.308068 | #DIV/0!      | 0.308068 |
| 0.5  | 0    | 0.308068 | #NUM!        | 1        |
| 0    | 0    | ?        | #DIV/0!      | ?        |
| 0    | 0    | ?        | #DIV/0!      | ?        |
| 1    | 0    | 0.308068 | #NUM!        | 1        |
| 0    | 0    | ?        | #DIV/0!      | ?        |
| 0    | 0    | ?        | #DIV/0!      | ?        |
| 0    | 0    | ?        | #DIV/0!      | ?        |
| 0    | 0    | ?        | #DIV/0!      | ?        |
| 0    | 0    | ?        | #DIV/0!      | ?        |
| 0    | 0    | ?        | #DIV/0!      | ?        |
| 2    | 1    | 0.806588 | -0.415037499 | 0.806588 |
| 3    | 3    | 0.908899 | 0.222392421  | 0.908899 |
| 0.5  | 0    | 0.622002 | 1            | 0.353387 |
| 0    | 0    | ?        | #DIV/0!      | ?        |
| 0.5  | 0    | 0.308068 | #NUM!        | 1        |
| 0    | 0    | ?        | #DIV/0!      | ?        |
| 0    | 0    | ?        | #DIV/0!      | ?        |
| 0    | 1    | 1        | #DIV/0!      | 0.308068 |
| 0    | 0    | ?        | #DIV/0!      | ?        |
| 0    | 0    | ?        | #DIV/0!      | ?        |
| 0    | 0    | 0.308068 | #DIV/0!      | 0.308068 |
| 0    | 0    | ?        | #DIV/0!      | ?        |
| 0    | 0    | ?        | #DIV/0!      | ?        |
| 0    | 0    | ?        | #DIV/0!      | ?        |
| 0    | 0    | ?        | #DIV/0!      | ?        |
| 0    | 1    | 0.308068 | #DIV/0!      | 0.308068 |
| 0.5  | 0    | 1        | 0            | 0.450185 |
| 0    | 0    | ?        | #DIV/0!      | ?        |
| 0    | 0    | ?        | #DIV/0!      | ?        |
| 1    | 0    | 0.308068 | #NUM!        | 1        |
| 0    | 0    | ?        | #DIV/0!      | ?        |
| 0    | 0    | ?        | #DIV/0!      | ?        |
| 0    | 0    | ?        | #DIV/0!      | ?        |

|     |      |          |              |          |
|-----|------|----------|--------------|----------|
| 0   | 0    | ?        | #DIV/0!      | ?        |
| 0   | 0    | ?        | #DIV/0!      | ?        |
| 0   | 0    | ?        | #DIV/0!      | ?        |
| 0   | 0    | ?        | #DIV/0!      | ?        |
| 1   | 0    | 0.308068 | #NUM!        | 1        |
| 0   | 0    | ?        | #DIV/0!      | ?        |
| 0   | 0    | ?        | #DIV/0!      | ?        |
| 0   | 0    | ?        | #DIV/0!      | ?        |
| 0   | 0    | ?        | #DIV/0!      | ?        |
| 0.5 | 0    | 1        | 0            | 0.450185 |
| 0.5 | 0    | 0.622002 | 1            | 0.353387 |
| 0   | 0    | ?        | #DIV/0!      | ?        |
| 39  | 39   | 0.339233 | -0.927850214 | 0.339233 |
| 2   | 1    | 0.18169  | #NUM!        | 0.450185 |
| 2.5 | 2    | 0.751907 | -0.736965594 | 0.873517 |
| 24  | 17.5 | 0.783659 | -0.337034987 | 0.933926 |
| 0   | 0    | ?        | #DIV/0!      | ?        |
| 0   | 0.5  | 1        | #DIV/0!      | 0.308068 |
| 0   | 0    | ?        | #DIV/0!      | ?        |
| 0   | 0    | ?        | #DIV/0!      | ?        |
| 0   | 0    | ?        | #DIV/0!      | ?        |
| 0   | 0    | ?        | #DIV/0!      | ?        |
| 0   | 0    | ?        | #DIV/0!      | ?        |
| 0   | 0    | 0.308068 | #DIV/0!      | 0.308068 |
| 0   | 0    | ?        | #DIV/0!      | ?        |
| 0   | 0.5  | 0.450185 | #DIV/0!      | 1        |
| 0   | 2    | 1        | #DIV/0!      | 0.308068 |
| 0   | 0    | ?        | #DIV/0!      | ?        |
| 0   | 0    | ?        | #DIV/0!      | ?        |
| 0   | 0    | ?        | #DIV/0!      | ?        |
| 0   | 0    | ?        | #DIV/0!      | ?        |
| 0   | 0    | ?        | #DIV/0!      | ?        |
| 0   | 0    | ?        | #DIV/0!      | ?        |
| 0   | 0    | ?        | #DIV/0!      | ?        |
| 0   | 0    | ?        | #DIV/0!      | ?        |
| 0   | 0    | ?        | #DIV/0!      | ?        |
| 2   | 0.5  | 0.630057 | -1           | 0.806588 |
| 1   | 0.5  | 0.764931 | 0.584962501  | 0.559404 |
| 0.5 | 1    | 0.281682 | 2.321928095  | 0.398521 |
| 0   | 0    | ?        | #DIV/0!      | ?        |
| 0   | 0    | ?        | #DIV/0!      | ?        |
| 0   | 0    | ?        | #DIV/0!      | ?        |
| 0   | 0    | ?        | #DIV/0!      | ?        |
| 0   | 0    | ?        | #DIV/0!      | ?        |
| 0   | 0    | ?        | #DIV/0!      | ?        |
| 0   | 0    | ?        | #DIV/0!      | ?        |
| 4   | 4    | 0.785812 | -0.678071905 | 0.785812 |
| 0   | 0    | ?        | #DIV/0!      | ?        |
| 0.5 | 0    | 0.308068 | #NUM!        | 1        |
| 0   | 0    | ?        | #DIV/0!      | ?        |
| 0.5 | 0    | 0.308068 | #NUM!        | 1        |
| 0   | 0    | ?        | #DIV/0!      | ?        |
| 2   | 1.5  | 1        | 0            | 0.860525 |
| 0.5 | 0    | 0.308068 | #NUM!        | 1        |
| 1.5 | 0.5  | 0.329316 | #NUM!        | 0.724378 |
| 0   | 0    | ?        | #DIV/0!      | ?        |
| 0   | 0    | ?        | #DIV/0!      | ?        |

|          |          |           |              |          |
|----------|----------|-----------|--------------|----------|
| 0        | 0        | ?         | #DIV/0!      | ?        |
| 0.5      | 0.5      | 0.450185  | #NUM!        | 0.450185 |
| 0        | 0        | ?         | #DIV/0!      | ?        |
| 0        | 0        | ?         | #DIV/0!      | ?        |
| 0        | 0        | ?         | #DIV/0!      | ?        |
| 0        | 0        | ?         | #DIV/0!      | ?        |
| 0        | 0        | ?         | #DIV/0!      | ?        |
| 0        | 0        | ?         | #DIV/0!      | ?        |
| 0        | 0        | ?         | #DIV/0!      | ?        |
| 0        | 0.5      | 1         | #DIV/0!      | 0.308068 |
| 1        | 0.5      | 0.0917211 | #NUM!        | 0.308068 |
| 0        | 0        | ?         | #DIV/0!      | ?        |
| 0        | 0        | ?         | #DIV/0!      | ?        |
| 0        | 0        | ?         | #DIV/0!      | ?        |
| 0        | 0        | ?         | #DIV/0!      | ?        |
| 0        | 0        | ?         | #DIV/0!      | ?        |
| 0        | 0        | ?         | #DIV/0!      | ?        |
| 0        | 0        | ?         | #DIV/0!      | ?        |
| 0        | 0        | ?         | #DIV/0!      | ?        |
| 0        | 0        | ?         | #DIV/0!      | ?        |
| 0        | 0        | ?         | #DIV/0!      | ?        |
| 0        | 0        | ?         | #DIV/0!      | ?        |
| 0        | 0        | ?         | #DIV/0!      | ?        |
| 0        | 0        | ?         | #DIV/0!      | ?        |
| 3        | 1        | 0.635978  | -1           | 0.87225  |
| 0.5      | 0.5      | 1         | 0            | 1        |
| 0        | 0        | ?         | #DIV/0!      | ?        |
| 0        | 0        | ?         | #DIV/0!      | ?        |
| 9.14E-06 | 4.08E-06 | 0.344391  | -13.51649135 | 0.651499 |
| 0        | 0        | ?         | #DIV/0!      | ?        |
| 0        | 0        | ?         | #DIV/0!      | ?        |
| 2.5      | 2        | 0.751907  | 0.485426827  | 0.639236 |
| 0        | 0.5      | 1         | #DIV/0!      | 0.308068 |
| 0        | 0        | ?         | #DIV/0!      | ?        |
| 0        | 0        | ?         | #DIV/0!      | ?        |
| 942.5    | 837.5    | 0.262715  | -1.238297115 | 0.348176 |
| 834      | 915.5    | 0.975767  | -0.046585124 | 0.901608 |
| 934.996  | 877      | 0.786346  | -0.403243856 | 0.839344 |
| 63.5     | 65       | 0.911704  | 0.191224403  | 0.926348 |
| 367.5    | 480.5    | 0.788622  | -0.64201719  | 0.624376 |
| 726.5    | 637.5    | 0.666098  | -0.7991866   | 0.756644 |
| 84.5     | 63.5     | 0.955851  | 0.074853995  | 0.755857 |
| 638      | 566.5    | 0.852042  | -0.273018494 | 0.9478   |
| 5619.63  | 5102.51  | 0.762202  | -0.346409192 | 0.862524 |
| 852.497  | 823.499  | 0.891839  | -0.228747509 | 0.916767 |
| 106.5    | 176      | 0.914283  | -0.18781516  | 0.511773 |
| 19       | 10.5     | 0.266137  | -1.440572591 | 0.717544 |
| 1        | 4        | 0.785812  | #NUM!        | 0.320255 |
| 12.5     | 14.5     | 1         | 0            | 0.910128 |
| 41.5     | 34       | 0.709763  | 0.519778332  | 0.602668 |
| 71       | 72       | 0.883527  | -0.242856524 | 0.873073 |
| 765.5    | 724.498  | 0.497766  | -0.792356008 | 0.549849 |
| 920.5    | 849.5    | 0.696889  | -0.519844424 | 0.770232 |
| 114.5    | 60       | 0.558259  | -0.438324352 | 0.62897  |
| 59.5     | 76.5     | 0.861222  | 0.314635602  | 0.975887 |
| 3265     | 3586.48  | 0.879224  | -0.277622352 | 0.812905 |
| 5236.4   | 4461.25  | 0.867285  | -0.263234993 | 0.984971 |
| 173.5    | 180      | 0.979412  | -0.050774567 | 0.957134 |
| 278.5    | 372.5    | 0.591647  | -1.393613063 | 0.423312 |



|         |         |          |              |          |
|---------|---------|----------|--------------|----------|
| 166     | 229     | 0.656478 | -1.330645312 | 0.481231 |
| 3.5     | 1.5     | 0.733579 | -0.485426827 | 0.733579 |
| 149.5   | 255.988 | 0.38918  | -1.191204343 | 0.107201 |
| 7992.3  | 4855.53 | 0.852234 | -0.251433903 | 0.787289 |
| 1599    | 1566    | 0.806592 | -0.327238565 | 0.82574  |
| 29.5    | 19      | 0.34019  | -2.297680549 | 0.575807 |
| 189.5   | 210.5   | 0.779008 | -0.54924575  | 0.70651  |
| 293     | 309     | 0.973546 | -0.052649797 | 0.933337 |
| 177     | 169.5   | 0.793363 | -0.406909618 | 0.828032 |
| 0       | 0       | ?        | #DIV/0!      | ?        |
| 0       | 0       | 0.308068 | #DIV/0!      | 0.308068 |
| 386.5   | 374.5   | 0.673577 | -0.528235413 | 0.704098 |
| 1492.01 | 1611.47 | 0.990906 | -0.018979773 | 0.935307 |
| 1172.5  | 986     | 0.786363 | -0.35380786  | 0.941582 |
| 3626.67 | 3498.5  | 0.940814 | -0.137307819 | 0.963821 |
| 1808    | 1823.5  | 0.969976 | -0.06237229  | 0.963899 |
| 2005.45 | 2081    | 0.633482 | 0.813304303  | 0.649802 |
| 57.5    | 57.5    | 0.898054 | 0.187932951  | 0.898054 |
| 1102.5  | 1111    | 0.789181 | -0.465414343 | 0.783512 |
| 9904.75 | 10857.9 | 0.877426 | -0.315167274 | 0.818684 |
| 371.5   | 267     | 0.916062 | 0.170140732  | 0.734701 |
| 908.998 | 1198.01 | 0.983973 | 0.039909825  | 0.836182 |
| 949.494 | 1175.51 | 0.996906 | 0.008352424  | 0.877021 |
| 997.993 | 804.504 | 0.995262 | -0.006511181 | 0.803926 |
| 7       | 12.5    | 0.909016 | 0.192645078  | 0.615253 |
| 217     | 282.5   | 0.752787 | -0.426160878 | 0.506457 |
| 33      | 47      | 0.792138 | 0.494764692  | 0.992161 |
| 29.5    | 39.5    | 0.916884 | -0.23878686  | 0.739079 |
| 353     | 425     | 0.891336 | -0.263852028 | 0.763223 |
| 3680.5  | 3054    | 0.938009 | 0.094994592  | 0.786742 |
| 2       | 0       | 0.308068 | #NUM!        | 1        |
| 57.5    | 94      | 0.952581 | -0.145050333 | 0.655807 |
| 1       | 0.5     | 0.764931 | 0.584962501  | 0.559404 |
| 1       | 1.5     | 0.545627 | #NUM!        | 0.3832   |
| 4.5     | 11      | 0.923955 | -0.362570079 | 0.493436 |
| 21      | 62      | 0.752443 | -2.392317423 | 0.323328 |
| 877.5   | 1367    | 0.629402 | -0.958673138 | 0.333141 |
| 214     | 252     | 0.57941  | -1.428584031 | 0.48489  |
| 10      | 12      | 0.395265 | -2.321928095 | 0.304033 |
| 372     | 323     | 0.736222 | -0.394500568 | 0.878629 |
| 2932    | 2821.5  | 0.691185 | -0.549722682 | 0.725471 |
| 2011.08 | 2122.92 | 0.677136 | -0.559999911 | 0.627366 |
| 871.001 | 853     | 0.717754 | -0.752507304 | 0.731224 |
| 430     | 493.5   | 0.664598 | 0.655884287  | 0.745263 |
| 570.5   | 507.5   | 0.572262 | -0.757339384 | 0.676089 |
| 1224.01 | 1607.99 | 0.788022 | -0.544858873 | 0.59849  |
| 1413.5  | 1393    | 0.828013 | -0.278322879 | 0.841924 |
| 52      | 93.5    | 0.948233 | -0.13058411  | 0.523199 |
| 450.5   | 518     | 0.92723  | -0.063839237 | 0.688005 |
| 453     | 442.5   | 0.522478 | -0.730610099 | 0.545338 |
| 1509.5  | 1495    | 0.754257 | -0.516827758 | 0.761723 |
| 3457.05 | 3313.31 | 0.762903 | -0.374393969 | 0.804525 |
| 550     | 473.5   | 0.793792 | -0.473931188 | 0.89484  |
| 3905.51 | 3783.62 | 0.718467 | -0.577834099 | 0.743566 |
| 148     | 120     | 0.637572 | -0.791600851 | 0.791879 |
| 1825.5  | 1554    | 0.664583 | -0.530866004 | 0.820366 |

|         |         |           |              |           |
|---------|---------|-----------|--------------|-----------|
| 1524    | 1323.5  | 0.700085  | -0.564518398 | 0.817475  |
| 246     | 237.5   | 0.920305  | -0.148098639 | 0.948452  |
| 777.002 | 764.003 | 0.619923  | -0.693384884 | 0.634687  |
| 19      | 11.5    | 0.628216  | 0.818161677  | 0.474482  |
| 706     | 561     | 0.62709   | -0.582410413 | 0.85008   |
| 4081.47 | 4928.74 | 0.0845302 | -1.458305359 | 0.0433587 |
| 752     | 696     | 0.719555  | -0.667368236 | 0.773255  |
| 2126    | 2344    | 0.784336  | -0.449372652 | 0.706827  |
| 1707    | 1748.5  | 0.871836  | -0.304705443 | 0.855736  |
| 919     | 887.5   | 0.752079  | -0.628388052 | 0.775085  |
| 642.5   | 687.5   | 0.778928  | -0.520197722 | 0.730583  |
| 1.5     | 0.5     | 0.613399  | 0.736965594  | 0.342872  |
| 2728.52 | 2437.5  | 0.662246  | -0.625600557 | 0.758671  |
| 8868.54 | 8462.92 | 0.723123  | -0.448938456 | 0.76816   |
| 5865.95 | 5637.46 | 0.55766   | -0.739238266 | 0.59441   |
| 727.5   | 648     | 0.814551  | -0.368531638 | 0.903437  |
| 1971.5  | 1694    | 0.3846    | -1.973534441 | 0.47043   |
| 1286    | 1178.5  | 0.885724  | -0.255872393 | 0.944273  |
| 1248.5  | 1251    | 0.954589  | -0.091223252 | 0.953108  |
| 1.5     | 1       | 0.785812  | -0.584962501 | 1         |
| 396.621 | 270.952 | 0.461796  | -1.53980108  | 0.692852  |
| 21521.1 | 20365.6 | 0.680885  | -0.616753594 | 0.726823  |
| 1735.5  | 1729.5  | 0.743752  | 0.563326206  | 0.742     |
| 95503.5 | 91947.5 | 0.593633  | -0.492205775 | 0.63992   |
| 487.5   | 327     | 0.848322  | -0.216731408 | 0.79532   |
| 3350.5  | 3147    | 0.686723  | -0.699982288 | 0.733031  |
| 934.5   | 876.5   | 0.737305  | -0.438644112 | 0.797059  |
| 2465    | 2710    | 0.890608  | -0.24986753  | 0.823659  |
| 617.5   | 549.5   | 0.218364  | -1.27594189  | 0.296381  |
| 388.5   | 325.5   | 0.963739  | -0.02434196  | 0.696862  |
| 286.5   | 254     | 0.822143  | -0.288947216 | 0.932544  |
| 188     | 236.5   | 0.0125465 | -2.214738849 | 0.0056216 |
| 9167    | 8430.5  | 0.457952  | -1.225228032 | 0.51804   |
| 44.5    | 35.5    | 0.425383  | -0.861023587 | 0.647667  |
| 1592    | 1491.5  | 0.816786  | -0.335128426 | 0.871662  |
| 2427.5  | 2247    | 0.751944  | -0.441931661 | 0.819612  |
| 3390.5  | 2996.5  | 0.577096  | -0.524852363 | 0.725262  |
| 95.5    | 88.5    | 0.495074  | -0.719447833 | 0.573452  |
| 2669.96 | 2723.97 | 0.730994  | -0.595932546 | 0.71596   |
| 1760.5  | 2014.5  | 0.850698  | -0.293929478 | 0.739022  |
| 1223    | 1134.5  | 0.754538  | -0.466675044 | 0.816717  |
| 666     | 721.5   | 0.915975  | -0.135014532 | 0.838875  |
| 2056    | 2793.5  | 0.952003  | -0.122217563 | 0.746779  |
| 702.5   | 666.5   | 0.674202  | -0.579837469 | 0.721107  |
| 3.5     | 11      | 0.953174  | 0.192645078  | 0.437832  |
| 2716.5  | 3243.5  | 0.983203  | -0.037663393 | 0.857924  |
| 502.5   | 502.5   | 0.942469  | -0.130629443 | 0.942469  |
| 2570.98 | 2459.5  | 0.822183  | -0.378283255 | 0.854967  |
| 1580.51 | 1743.52 | 0.849419  | -0.398570537 | 0.787139  |
| 1214.48 | 1168    | 0.928437  | -0.151359125 | 0.955881  |
| 787     | 819     | 0.893638  | -0.211890085 | 0.862415  |
| 4922.5  | 4420.5  | 0.66505   | -0.47340211  | 0.780986  |
| 3231    | 3592.5  | 0.93786   | -0.154436179 | 0.870077  |
| 2979.5  | 3068.99 | 0.904873  | -0.193831181 | 0.882381  |
| 1378    | 1314    | 0.883712  | -0.23114348  | 0.919959  |
| 1781.4  | 1561.33 | 0.803928  | -0.397980374 | 0.903226  |

|         |         |          |              |          |
|---------|---------|----------|--------------|----------|
| 916.5   | 975.5   | 0.965394 | -0.026209879 | 0.843185 |
| 103     | 141     | 0.918781 | -0.235289415 | 0.727651 |
| 16      | 8       | 0.400619 | -0.830074999 | 0.897841 |
| 2307    | 2301    | 0.890191 | -0.263034406 | 0.891888 |
| 1142    | 1018    | 0.778441 | -0.444819935 | 0.86735  |
| 756     | 675.001 | 0.777029 | -0.388567786 | 0.876414 |
| 1301    | 1247    | 0.903202 | -0.172977738 | 0.938618 |
| 3470.99 | 3733.5  | 0.840425 | -0.302437805 | 0.778833 |
| 1295    | 1201    | 0.839679 | -0.308759036 | 0.899427 |
| 676.502 | 676.999 | 0.843564 | -0.263681149 | 0.84289  |
| 4373.5  | 4370.5  | 0.556668 | -0.75750824  | 0.557289 |
| 15788.5 | 15876   | 0.652938 | -0.563962466 | 0.647606 |
| 42.5    | 50.5    | 0.826643 | -0.432111013 | 0.707696 |
| 58.5    | 37      | 0.597706 | -1.089005006 | 0.868427 |
| 1.5     | 4       | 0.794363 | -1.584962501 | 0.392404 |
| 0.5     | 0.5     | 0.450185 | #NUM!        | 0.450185 |
| 941.5   | 1265.5  | 0.853295 | -0.416315012 | 0.665441 |
| 980     | 757.5   | 0.889937 | -0.190123618 | 0.907538 |
| 755.499 | 752.504 | 0.785395 | -0.423016796 | 0.788619 |
| 1308.5  | 1487    | 0.885514 | -0.271549168 | 0.796912 |
| 367     | 353.5   | 0.616299 | -0.522456772 | 0.65793  |
| 4416.01 | 4302.46 | 0.805117 | -0.447863246 | 0.823385 |
| 772     | 774     | 0.833837 | -0.336248349 | 0.831814 |
| 2002    | 2036    | 0.878007 | -0.26418787  | 0.865801 |
| 4155    | 2479.5  | 0.934724 | 0.111866968  | 0.630466 |
| 10554.5 | 8096    | 0.675245 | -0.587596186 | 0.897198 |
| 149     | 124     | 0.849084 | -0.312277925 | 0.97899  |
| 160.5   | 345     | 0.982773 | 0.061587798  | 0.594142 |
| 1190    | 1202.5  | 0.791372 | -0.495646669 | 0.78412  |
| 84.5    | 114     | 0.723564 | -0.846290585 | 0.53751  |
| 1520    | 1386    | 0.678364 | -0.743307121 | 0.744466 |
| 2467.69 | 2594.03 | 0.870464 | -0.271907144 | 0.832649 |
| 2       | 5.5     | 1        | 0            | 0.430476 |
| 1209.5  | 1067.5  | 0.717354 | -0.540624336 | 0.819859 |
| 8240.11 | 8098.93 | 0.831898 | -0.285435485 | 0.847619 |
| 6.5     | 7       | 0.875548 | -0.378511623 | 0.834882 |
| 1586.47 | 2182.31 | 0.478478 | -1.79249839  | 0.305117 |
| 2752.52 | 3147    | 0.715207 | -0.670831866 | 0.617178 |
| 1148.5  | 1168    | 0.643741 | -0.481663273 | 0.624877 |
| 0.5     | 1       | 1        | 0            | 0.651448 |
| 1373.49 | 1299    | 0.809064 | -0.370383565 | 0.853868 |
| 1       | 2.5     | 0.855216 | 0.584962501  | 0.717686 |
| 4       | 6.5     | 0.865665 | 0.321928095  | 0.800348 |
| 54.5    | 109.5   | 0.842736 | -0.638901308 | 0.469466 |
| 1.5     | 3       | 0.598723 | 1.415037499  | 0.829606 |
| 182.5   | 272     | 0.8451   | -0.500525398 | 0.609242 |
| 2486    | 2730    | 0.816192 | -0.462626958 | 0.753322 |
| 2811.01 | 2739.03 | 0.753091 | 0.557845059  | 0.740428 |
| 0       | 0       | ?        | #DIV/0!      | ?        |
| 20.1007 | 14.1241 | 0.382969 | 1.906530248  | 0.340696 |
| 542     | 542.999 | 0.751539 | -0.633004524 | 0.750315 |
| 36      | 34      | 0.751499 | -0.678071905 | 0.786814 |
| 1.5     | 0       | 0.495025 | -1.584962501 | 0.724378 |
| 210     | 195     | 0.698069 | -0.610957709 | 0.757103 |
| 71      | 96      | 0.728336 | -0.641952479 | 0.504978 |
| 5       | 5.5     | 0.428902 | -3.321928095 | 0.385414 |

|         |         |           |              |          |
|---------|---------|-----------|--------------|----------|
| 621     | 497     | 0.841714  | 0.318671971  | 0.72035  |
| 0       | 0       | ?         | #DIV/0!      | ?        |
| 84.5    | 125     | 0.716259  | -1.061029433 | 0.498792 |
| 0.5     | 0.5     | 1         | 0            | 1        |
| 670.5   | 712.5   | 0.834359  | -0.397571676 | 0.792658 |
| 180.5   | 173.5   | 0.814442  | -0.424392664 | 0.842049 |
| 160.5   | 128.5   | 0.759973  | -0.378062256 | 0.966779 |
| 1417.5  | 1289.5  | 0.510502  | -1.973277993 | 0.559522 |
| 42.5    | 63      | 0.969813  | -0.087462841 | 0.730632 |
| 1000    | 1089.5  | 0.855636  | -0.334607229 | 0.795064 |
| 3016.5  | 2880    | 0.799818  | -0.333753776 | 0.842658 |
| 10.5    | 21.5    | 0.667279  | -2.392317423 | 0.355618 |
| 1       | 1       | 0.622002  | -1           | 0.622002 |
| 0.5     | 1.5     | 1         | 0            | 0.513713 |
| 239     | 260.5   | 0.878481  | -0.278814989 | 0.817697 |
| 337     | 357     | 0.819441  | -0.410762844 | 0.777793 |
| 5       | 3       | 0.490574  | -1.321928095 | 0.810902 |
| 98      | 104.5   | 0.350376  | -2.257157839 | 0.317587 |
| 8       | 2       | 0.0887543 | -2.415037499 | 0.860525 |
| 2494.5  | 2629    | 0.738093  | -0.552791663 | 0.696885 |
| 11      | 17      | 0.881698  | 0.2410081    | 0.767395 |
| 0       | 0       | 0.308068  | #DIV/0!      | 0.308068 |
| 548     | 278     | 0.963876  | -0.06185847  | 0.634055 |
| 557     | 865.5   | 0.826024  | -0.397019664 | 0.486475 |
| 286.45  | 341.521 | 0.61233   | -1.326910195 | 0.51088  |
| 0.5     | 0       | 0.308068  | #NUM!        | 1        |
| 2132.45 | 2198.96 | 0.9583    | -0.084254521 | 0.93544  |
| 74.5    | 62.5    | 0.373015  | -1.361187525 | 0.497882 |
| 110.5   | 128     | 0.979456  | 0.051301229  | 0.93079  |
| 548.5   | 294.5   | 0.539291  | -1.378248622 | 0.875155 |
| 3       | 5.5     | 0.855681  | -0.584962501 | 0.538083 |
| 0       | 3.5     | 0.680109  | #DIV/0!      | 0.338084 |
| 645     | 536     | 0.658966  | -0.813519097 | 0.786061 |
| 5       | 3       | 0.35288   | -3.321928095 | 0.58535  |
| 10.5    | 13      | 0.87266   | -0.392317423 | 0.750291 |
| 26      | 22      | 0.922513  | -0.176877762 | 0.974114 |
| 247     | 220     | 0.673277  | -0.783460305 | 0.753496 |
| 2       | 2       | 0.866773  | 0.321928095  | 0.866773 |
| 81.5    | 78      | 0.834307  | -0.326360341 | 0.86889  |
| 880.121 | 985.519 | 0.867408  | -0.305382983 | 0.786714 |
| 1.5     | 1       | 0.559404  | -1.584962501 | 0.764931 |
| 479     | 1102    | 0.807434  | -1.04279494  | 0.417232 |
| 7       | 9.5     | 0.689086  | -1           | 0.504632 |
| 390     | 250     | 0.976593  | -0.04699748  | 0.766628 |
| 1359.07 | 1214.9  | 0.895264  | -0.196576578 | 0.982407 |
| 0       | 0       | ?         | #DIV/0!      | ?        |
| 289.5   | 292     | 0.925135  | -0.163399068 | 0.919129 |
| 3351.51 | 3293.01 | 0.753365  | -0.402262182 | 0.770256 |
| 335.104 | 446.668 | 0.745985  | -0.688025379 | 0.552565 |
| 4571.25 | 4762.03 | 0.979041  | 0.039924689  | 0.989783 |
| 959.5   | 1559.5  | 0.996389  | -0.010563714 | 0.698851 |
| 3421    | 3247    | 0.284626  | -0.735981922 | 0.339191 |
| 414     | 436.5   | 0.96346   | 0.053027364  | 0.983491 |
| 273.5   | 262.5   | 0.801708  | 0.224275098  | 0.756403 |
| 546.5   | 539     | 0.685682  | -1.011928644 | 0.693561 |
| 1061    | 984     | 0.932485  | 0.119342094  | 0.876223 |

|         |         |          |              |          |
|---------|---------|----------|--------------|----------|
| 556.5   | 507     | 0.725635 | -0.478186184 | 0.808949 |
| 570     | 509.5   | 0.999334 | -0.001266077 | 0.920283 |
| 633.5   | 911.5   | 0.900828 | 0.266446378  | 0.884786 |
| 26      | 20      | 0.19634  | -1.793549123 | 0.344742 |
| 9       | 12      | 0.44598  | 0.830074999  | 0.651448 |
| 818.505 | 844.501 | 0.782016 | -0.515718056 | 0.760029 |
| 10.5    | 13.5    | 0.704145 | -0.932885804 | 0.551595 |
| 3315    | 2973.5  | 0.723722 | -0.524868154 | 0.813709 |
| 340.5   | 549     | 0.725179 | -1.116890239 | 0.469953 |
| 1344    | 2001.5  | 0.895604 | 0.297243832  | 0.881333 |
| 3.5     | 2       | 0.514418 | -1.807354922 | 0.787312 |
| 5.5     | 9       | 0.562334 | 1.125530882  | 0.783936 |
| 173     | 162.5   | 0.906008 | 0.191080615  | 0.866231 |
| 792.498 | 782.511 | 0.928741 | 0.162530063  | 0.921247 |
| 447     | 428.5   | 0.989023 | -0.022771308 | 0.981968 |
| 661.5   | 710     | 0.400307 | -0.634887726 | 0.323353 |
| 483.569 | 513.593 | 0.551357 | -1.940298027 | 0.520774 |
| 658.665 | 644.615 | 0.515488 | -1.896309123 | 0.526907 |
| 330.418 | 328.27  | 0.547659 | -1.610391793 | 0.551284 |
| 193.851 | 141.518 | 0.600137 | -1.062003884 | 0.796634 |
| 159.5   | 241     | 0.717272 | -1.022791865 | 0.482987 |
| 423.5   | 404     | 0.721816 | -0.709409872 | 0.753017 |
| 255.5   | 151.5   | 0.51086  | -1.458019119 | 0.806187 |
| 0       | 0       | ?        | #DIV/0!      | ?        |
| 1121.95 | 852.891 | 0.808135 | -0.381268228 | 0.993645 |
| 106.552 | 89.1085 | 0.564191 | 1.016859728  | 0.50796  |
| 18.5    | 69      | 0.768428 | -2.039528364 | 0.234323 |
| 1726.5  | 1368    | 0.858784 | -0.281451503 | 0.975576 |
| 555.999 | 672.497 | 0.503151 | -1.919266133 | 0.401505 |
| 84.5    | 78.5455 | 0.587013 | -1.619519723 | 0.624801 |
| 798.5   | 758.454 | 0.548195 | -1.916634744 | 0.574159 |
| 621.997 | 486.498 | 0.78471  | 0.459865292  | 0.669183 |
| 1442.5  | 1496    | 0.868144 | -0.327564853 | 0.844511 |
| 460.5   | 542.5   | 0.90299  | -0.258342711 | 0.800212 |
| 418     | 468.5   | 0.96329  | -0.079825248 | 0.88152  |
| 202     | 254     | 0.630917 | -1.439042962 | 0.507429 |
| 630     | 621     | 0.778274 | -0.50804513  | 0.788541 |
| 55      | 44.5    | 0.864096 | -0.273565073 | 0.985586 |
| 178     | 132.5   | 0.511726 | -1.817521948 | 0.665688 |
| 325.5   | 566.5   | 0.752061 | -1.051892984 | 0.461942 |
| 2033.5  | 1306.5  | 0.589457 | -0.857249546 | 0.910868 |
| 13.5    | 15      | 0.660903 | -1.054447784 | 0.597333 |
| 815     | 551     | 0.629505 | -0.872994723 | 0.887827 |
| 110.5   | 118.5   | 0.608019 | -1.296049463 | 0.567328 |
| 0.5     | 0       | 0.308068 | #NUM!        | 1        |
| 2003.5  | 1811.5  | 0.535428 | -0.627900304 | 0.646184 |
| 1589.5  | 1389    | 0.661195 | -0.740297455 | 0.761563 |
| 0.5     | 6.5     | 0.445085 | 3.321928095  | 0.789102 |
| 3135    | 2874.5  | 0.699544 | -0.513915909 | 0.778861 |
| 144.5   | 171     | 0.955693 | -0.082168542 | 0.811592 |
| 15      | 53.5    | 0.905028 | -0.263034406 | 0.123396 |
| 3       | 17.5    | 0.651448 | 0.584962501  | 0.022669 |
| 118.5   | 121.5   | 0.527344 | -0.659924558 | 0.501444 |
| 11      | 3.5     | 0.319051 | 2.334984248  | 0.258011 |
| 290.5   | 271     | 0.717175 | -0.545769733 | 0.774584 |
| 0.5     | 2.5     | 0.837425 | 1            | 0.550362 |

|         |         |          |              |          |
|---------|---------|----------|--------------|----------|
| 18.5    | 19      | 0.758361 | -0.624490865 | 0.740774 |
| 3692.5  | 3870    | 0.785957 | -0.553752731 | 0.755179 |
| 7103.03 | 7975.35 | 0.751224 | -0.499557912 | 0.65572  |
| 2652    | 2859    | 0.701064 | -0.627619323 | 0.641426 |
| 1853.5  | 1886.5  | 0.569053 | -0.70628928  | 0.552518 |
| 2578    | 2511    | 0.552065 | -0.663151564 | 0.57878  |
| 1058.02 | 1445.91 | 0.677702 | -0.742888857 | 0.445339 |
| 328.414 | 439.805 | 0.680851 | -0.533656141 | 0.411587 |
| 575     | 501     | 0.972868 | -0.043307176 | 0.909332 |
| 1118.5  | 982.5   | 0.616178 | -0.698989368 | 0.728677 |
| 1605.5  | 1472.5  | 0.55307  | -0.513097664 | 0.663023 |
| 107.5   | 136.5   | 0.767323 | -0.481406309 | 0.572406 |
| 636.5   | 534     | 0.565623 | -0.598054714 | 0.757487 |
| 620.502 | 613.003 | 0.799134 | -0.444398872 | 0.808005 |
| 2254.49 | 2552.5  | 0.913558 | -0.207485951 | 0.829794 |
| 1217    | 1048.5  | 0.634039 | -0.522043895 | 0.792626 |
| 1472    | 1072.5  | 0.554863 | -0.523561956 | 0.947318 |
| 1337.5  | 1250.5  | 0.755551 | -0.413779622 | 0.81726  |
| 1445.5  | 1476    | 0.783544 | -0.427903126 | 0.766523 |
| 1360    | 1260    | 0.680441 | -0.457377771 | 0.762155 |
| 874.5   | 930.5   | 0.859947 | -0.315960159 | 0.815475 |
| 1200    | 1242.5  | 0.730454 | -0.473931188 | 0.698796 |
| 17256   | 17816   | 0.942454 | -0.128498123 | 0.920637 |
| 1691.5  | 1599    | 0.915242 | -0.148075588 | 0.962669 |
| 1205.5  | 1247.5  | 0.818263 | -0.401735187 | 0.793077 |
| 5788    | 5186.5  | 0.921938 | -0.157608386 | 0.999673 |
| 916     | 959.5   | 0.795073 | -0.439391829 | 0.759649 |
| 3427.34 | 3684.49 | 0.855664 | -0.340964799 | 0.805615 |
| 1090    | 1074.5  | 0.799257 | -0.415048088 | 0.81033  |
| 1145    | 1106.51 | 0.84001  | -0.249733903 | 0.873341 |
| 1796    | 1467.5  | 0.302972 | -0.762766081 | 0.54091  |
| 7466.82 | 7785.89 | 0.77611  | -0.469863438 | 0.743449 |
| 1036    | 976     | 0.703349 | -0.457431197 | 0.763262 |
| 1055    | 1034.5  | 0.791788 | -0.47127464  | 0.805837 |
| 3610.11 | 3309.13 | 0.606255 | -0.543448928 | 0.70181  |
| 484.5   | 458     | 0.675328 | -0.602940242 | 0.723722 |
| 223     | 243     | 0.858726 | -0.277337944 | 0.788512 |
| 608.5   | 529.5   | 0.629791 | -0.585555348 | 0.765312 |
| 525.048 | 559.355 | 0.796606 | -0.457974336 | 0.750038 |
| 121.5   | 115.5   | 0.26397  | -0.994075166 | 0.304762 |
| 1.5     | 1.5     | 0.791627 | 0.415037499  | 0.791627 |
| 1       | 0       | 0        | #NUM!        | ?        |
| 1       | 1       | 0.622002 | -1           | 0.622002 |
| 60      | 90      | 0.858845 | -0.497499659 | 0.635585 |
| 846.5   | 819.5   | 0.775409 | -0.535541699 | 0.797685 |
| 222.5   | 208.5   | 0.672683 | -0.758742537 | 0.719464 |
| 1015    | 1071    | 0.842201 | -0.363382522 | 0.804218 |
| 4.5     | 7       | 1        | 0            | 0.677453 |
| 5.5     | 3.5     | 0.940721 | -0.137503524 | 0.824188 |
| 345     | 386     | 0.846382 | -0.337695411 | 0.762274 |
| 835.812 | 647.472 | 0.441954 | -0.781940177 | 0.710799 |
| 316     | 291.5   | 0.948358 | 0.105610188  | 0.895991 |
| 1683.5  | 1873    | 0.82016  | -0.372397322 | 0.735514 |
| 1290    | 1387    | 0.990473 | -0.019705409 | 0.937763 |
| 957.5   | 942     | 0.785935 | -0.436542339 | 0.798748 |
| 1494.5  | 1115.5  | 0.841421 | -0.190646837 | 0.833878 |

|         |         |            |              |            |
|---------|---------|------------|--------------|------------|
| 153.5   | 130     | 0.714595   | -0.596758928 | 0.83975    |
| 3415.43 | 3096.51 | 0.985465   | 0.027057393  | 0.914027   |
| 78      | 175.5   | 0.90637    | -0.390584456 | 0.481431   |
| 19      | 14      | 0.47679    | -0.788495895 | 0.780937   |
| 605.998 | 591.496 | 0.822088   | -0.415035912 | 0.838734   |
| 0.5     | 0       | 0.308068   | #NUM!        | 1          |
| 1       | 0       | 0.198892   | 1.321928095  | 0.0714215  |
| 93      | 127     | 0.555406   | -1.096215315 | 0.345639   |
| 7       | 2.5     | 0.207143   | -0.807354922 | 0.481309   |
| 1189.29 | 1004.13 | 0.339561   | -0.999422693 | 0.492219   |
| 2437.04 | 2093.53 | 0.560636   | -0.762079909 | 0.697286   |
| 5200.5  | 5060    | 0.844539   | -0.262618344 | 0.869387   |
| 293.579 | 209.108 | 0.0199545  | -1.377208976 | 0.0942959  |
| 11830   | 10183   | 0.271683   | -0.875788228 | 0.419883   |
| 54.7368 | 41.7682 | 0.3872     | -1.390354836 | 0.577634   |
| 470.448 | 353.336 | 0.0802268  | -1.021702505 | 0.276855   |
| 50134.6 | 37165.7 | 0.511493   | -0.49409148  | 0.941134   |
| 1045.34 | 1198.41 | 0.385872   | -0.892867936 | 0.274501   |
| 1672.48 | 1428.28 | 0.00122783 | -1.550403569 | 0.00256375 |
| 605.394 | 775.535 | 0.511153   | -0.439931688 | 0.221577   |
| 546.498 | 529.997 | 0.992294   | -0.017254137 | 0.988135   |
| 1       | 1.5     | 1          | 0            | 0.756486   |
| 2       | 5.5     | 0.62268    | 1.459431619  | 1          |
| 399.5   | 396     | 0.759926   | -0.382308429 | 0.768552   |
| 1087.99 | 1065.01 | 0.882137   | -0.241170968 | 0.898159   |
| 439     | 447.5   | 0.814368   | -0.368686193 | 0.798941   |
| 2434.5  | 2453    | 0.688407   | -0.544209407 | 0.681501   |
| 7157    | 7901.5  | 0.752816   | -0.522774756 | 0.674779   |
| 4406.5  | 4486.5  | 0.742293   | -0.465624596 | 0.726355   |
| 548.5   | 487.5   | 0.594262   | -0.757273142 | 0.694701   |
| 2160.5  | 1925    | 0.751799   | -0.471669998 | 0.846332   |
| 16      | 19.5    | 0.934937   | 0.169925001  | 0.951166   |
| 10.5    | 4.5     | 0.486653   | -1.070389328 | 0.947192   |
| 8       | 10      | 0.687418   | 0.584962501  | 0.838734   |
| 4       | 1.5     | 0.494216   | 0.906890596  | 0.275419   |
| 284.5   | 406.5   | 0.990162   | -0.025580369 | 0.756311   |
| 35      | 21.5    | 0.744762   | -0.456857675 | 0.890069   |
| 286.5   | 342.5   | 0.818872   | -0.37122844  | 0.673599   |
| 0       | 0       | ?          | #DIV/0!      | ?          |
| 447     | 362     | 0.709146   | -0.495791991 | 0.896067   |
| 6641.1  | 6050.1  | 0.456324   | -0.898260906 | 0.540189   |
| 717.744 | 624.108 | 0.590886   | -0.609630377 | 0.734089   |
| 585.503 | 420     | 0.709787   | -0.564179776 | 0.961917   |
| 45      | 47.5    | 0.936228   | 0.122856748  | 0.976051   |
| 1412    | 1374    | 0.77565    | -0.397435183 | 0.799843   |
| 379.5   | 318.5   | 0.547324   | -0.504560994 | 0.778258   |
| 869.5   | 722.5   | 0.738095   | -0.369579523 | 0.9322     |
| 339.5   | 380     | 0.86484    | -0.330452167 | 0.788465   |
| 1502.12 | 1672.02 | 0.829087   | -0.384764166 | 0.750105   |
| 424     | 466.5   | 0.879406   | -0.250162188 | 0.805401   |
| 20.5    | 31      | 0.924595   | -0.109624491 | 0.471051   |
| 9101.5  | 18100.5 | 0.474735   | -0.924423088 | 0.0862983  |
| 3663.32 | 7076.84 | 0.66412    | -0.906580986 | 0.245916   |
| 1595.2  | 3083.56 | 0.662361   | -0.729576028 | 0.204249   |
| 25.5    | 45      | 0.632818   | -0.628031223 | 0.19186    |
| 14311.2 | 24952.5 | 0.634381   | -0.80659452  | 0.244642   |

|         |         |          |              |           |
|---------|---------|----------|--------------|-----------|
| 6403.86 | 13664.7 | 0.620333 | -0.763979315 | 0.130418  |
| 948     | 777.5   | 0.900037 | -0.174497731 | 0.941992  |
| 1602.5  | 1592.99 | 0.782742 | -0.430575642 | 0.787545  |
| 1810    | 1925.5  | 0.252537 | -0.640000543 | 0.19457   |
| 3712.08 | 7880.19 | 0.718804 | -0.769535208 | 0.237811  |
| 1358.99 | 1295.51 | 0.78895  | -0.414673065 | 0.827336  |
| 551     | 579     | 0.935834 | -0.161928594 | 0.905312  |
| 42      | 65      | 0.285265 | -1.304854582 | 0.0884124 |
| 49      | 61.5    | 0.725853 | -0.424885285 | 0.497288  |
| 101.5   | 107.5   | 0.483958 | -2.239071162 | 0.454819  |
| 4778.5  | 4679    | 0.755734 | -0.547487795 | 0.771118  |
| 250     | 198.5   | 0.655872 | -0.873027144 | 0.805174  |
| 19      | 8       | 0.346432 | -1.440572591 | 0.931878  |
| 5.5     | 6.5     | 0.434451 | -2.459431619 | 0.351683  |
| 3079    | 2943.5  | 0.894565 | -0.175411712 | 0.934909  |
| 394.5   | 371     | 0.919621 | -0.166500611 | 0.963472  |
| 14886.5 | 12873   | 0.651852 | -0.538099215 | 0.795995  |
| 2823.04 | 2899.49 | 0.780588 | -0.425459448 | 0.758397  |
| 1765.52 | 1710.02 | 0.933998 | -0.16203253  | 0.953488  |
| 3086.5  | 2935    | 0.731685 | -0.605914139 | 0.768243  |
| 3644.5  | 3683.5  | 0.696706 | -0.391933989 | 0.684173  |
| 462.001 | 433.999 | 0.952361 | 0.10098326   | 0.91273   |
| 4.5     | 8.5     | 0.925659 | -0.169925001 | 0.428902  |
| 1835.5  | 1380.5  | 0.244423 | -0.793470525 | 0.592011  |
| 339     | 352     | 0.716101 | -0.534776744 | 0.683728  |
| 781     | 645     | 0.57088  | -0.597951483 | 0.777655  |
| 2918.5  | 3147    | 0.487526 | -0.665521302 | 0.409328  |
| 46355   | 49001.6 | 0.846443 | -0.329651613 | 0.80473   |
| 540.5   | 583.5   | 0.917542 | -0.184849277 | 0.863663  |
| 2424.59 | 2946.31 | 0.909684 | -0.232892092 | 0.78292   |
| 630.5   | 674.5   | 0.795606 | -0.368137808 | 0.735527  |
| 979.795 | 1076.58 | 0.81243  | -0.394995525 | 0.738825  |
| 1784.5  | 1870.5  | 0.888277 | -0.267487797 | 0.856939  |
| 2324    | 2555.5  | 0.868779 | -0.322471381 | 0.805232  |
| 1476.5  | 1759.5  | 0.898797 | -0.237946794 | 0.775097  |
| 1395    | 1458    | 0.943954 | -0.105086642 | 0.908127  |
| 17      | 33      | 0.749249 | -1.087462841 | 0.402265  |
| 1120    | 1058    | 0.835092 | -0.401362562 | 0.872101  |
| 4851.53 | 5390.97 | 0.878575 | -0.297855078 | 0.807996  |
| 139     | 155     | 0.86254  | 0.348664477  | 0.920003  |
| 2243.5  | 1998    | 0.742885 | -0.473323986 | 0.840712  |
| 888     | 1432.5  | 0.901414 | -0.301561246 | 0.607154  |
| 1502.5  | 1557    | 0.920787 | -0.198899894 | 0.898645  |
| 3541    | 2940.5  | 0.823842 | -0.449812855 | 0.934641  |
| 641     | 609     | 0.985843 | 0.03117055   | 0.953522  |
| 1533.49 | 1723    | 0.795768 | -0.44241234  | 0.706017  |
| 461.5   | 430     | 0.746766 | -0.592798995 | 0.796083  |
| 2165.5  | 2406.5  | 0.916377 | -0.216298312 | 0.850495  |
| 4.5     | 8.5     | 0.642995 | -0.847996907 | 0.221048  |
| 358.502 | 403.498 | 0.824472 | -0.374706905 | 0.732878  |
| 113.5   | 104.5   | 0.818107 | -0.358942937 | 0.882639  |
| 1.5     | 1       | 0.391002 | -1.584962501 | 0.651448  |
| 15      | 17      | 0.630543 | -1.099535674 | 0.552399  |
| 1       | 6       | 0.748162 | 1.321928095  | 0.471729  |
| 1109.01 | 1157.48 | 0.934205 | 0.154093402  | 0.959671  |
| 2.5     | 8       | 1        | 0            | 0.453522  |



|         |         |           |              |           |
|---------|---------|-----------|--------------|-----------|
| 9336    | 9953.5  | 0.849092  | -0.404772086 | 0.80939   |
| 14071.8 | 13900.7 | 0.770065  | -0.649205665 | 0.777456  |
| 1706    | 1707.51 | 0.86048   | -0.306482648 | 0.859849  |
| 1159.99 | 1303.49 | 0.790449  | -0.538742635 | 0.712206  |
| 1991    | 2010.5  | 0.829905  | -0.293497477 | 0.821088  |
| 3643.5  | 3839.5  | 0.763584  | -0.444707852 | 0.71854   |
| 741.5   | 574.502 | 0.575149  | -0.547047399 | 0.868963  |
| 443.824 | 720.724 | 0.685522  | -0.900997524 | 0.372353  |
| 249     | 291     | 0.683302  | -0.629085054 | 0.553812  |
| 39.2354 | 45.6375 | 0.759644  | -0.554640905 | 0.647482  |
| 4468.5  | 3921    | 0.963367  | -0.058812977 | 0.924409  |
| 583.5   | 562.5   | 0.745288  | 0.423358096  | 0.720079  |
| 613     | 597.5   | 0.892964  | -0.204460828 | 0.913304  |
| 11618   | 8197    | 0.64342   | -0.551969919 | 0.972194  |
| 635.5   | 331.5   | 0.324778  | -1.221635895 | 0.860741  |
| 851     | 656.5   | 0.518414  | -1.125685008 | 0.70157   |
| 7       | 4.5     | 0.796417  | -0.347923303 | 0.86297   |
| 85.5    | 44      | 0.359859  | 2.161467194  | 0.306674  |
| 1       | 4       | 1         | 0            | 0.230584  |
| 5403.5  | 4861.5  | 0.587061  | -0.668147293 | 0.68821   |
| 777     | 829.5   | 0.846626  | -0.353843275 | 0.800366  |
| 288.5   | 283.5   | 0.939877  | -0.106338318 | 0.954512  |
| 786.5   | 1074.5  | 0.790834  | -0.583129343 | 0.585544  |
| 80      | 104     | 0.686643  | -0.767339243 | 0.498316  |
| 30      | 27      | 0.355369  | 2.159198595  | 0.343702  |
| 610.5   | 707.5   | 0.856504  | -0.32015683  | 0.746715  |
| 31.5    | 27      | 0.598723  | -1.169925001 | 0.692487  |
| 292     | 245     | 0.622395  | -0.742741333 | 0.764301  |
| 1813    | 1827    | 0.839419  | -0.295220795 | 0.832869  |
| 781     | 798     | 0.790208  | -0.351790895 | 0.769988  |
| 2275.5  | 2186    | 0.65608   | -0.574539043 | 0.693842  |
| 809     | 785.5   | 0.882985  | -0.295861237 | 0.901156  |
| 9742.61 | 12571.2 | 0.928012  | -0.189888119 | 0.763666  |
| 872.5   | 905     | 0.797319  | -0.4493392   | 0.770268  |
| 1578.5  | 1426.5  | 0.222949  | -1.091008813 | 0.298572  |
| 4743    | 4652    | 0.0253031 | -0.973179414 | 0.0281012 |
| 710     | 756     | 0.680877  | -0.572318291 | 0.624618  |
| 5233.45 | 5128.49 | 0.334425  | -0.64811292  | 0.357778  |
| 310.5   | 226.5   | 0.298986  | -1.318447526 | 0.541362  |
| 8749.96 | 9188.28 | 0.368718  | -1.18129988  | 0.333507  |
| 16290.8 | 13885.2 | 0.475944  | -1.455005379 | 0.577027  |
| 2264.56 | 1962.98 | 0.764845  | -0.406053042 | 0.890508  |
| 5259.5  | 4984    | 0.954718  | -0.107896697 | 0.987624  |
| 5406.55 | 5925.52 | 0.906747  | -0.23308383  | 0.847673  |
| 1791.5  | 2125    | 0.909975  | -0.235199685 | 0.801217  |
| 2432.51 | 2691.6  | 0.921763  | -0.174777951 | 0.849764  |
| 13.5046 | 7.04303 | 0.139915  | -1.488958242 | 0.643759  |
| 172.492 | 238.115 | 0.295065  | -0.478891096 | 0.0590791 |
| 98.8525 | 75.7091 | 0.0975804 | -2.030496962 | 0.199029  |
| 2097.51 | 2161.51 | 0.961245  | -0.092314053 | 0.942209  |
| 1404    | 1314    | 0.687489  | -0.907472569 | 0.727553  |
| 426     | 328     | 0.696009  | -0.842925917 | 0.849553  |
| 453.5   | 504.002 | 0.789808  | -0.503035154 | 0.714954  |
| 11424   | 8593.64 | 0.677274  | -0.597790702 | 0.909267  |
| 4020.53 | 3622.51 | 0.942748  | -0.093896897 | 0.967276  |
| 37      | 46.5    | 0.441766  | -0.851901361 | 0.257876  |

|         |         |          |              |          |
|---------|---------|----------|--------------|----------|
| 188     | 124     | 0.728257 | 0.535523568  | 0.550582 |
| 475.5   | 586.5   | 0.919077 | -0.203303559 | 0.77932  |
| 211.5   | 243     | 0.941397 | 0.133467142  | 0.968523 |
| 7343    | 7471.5  | 0.755774 | -0.365913978 | 0.737747 |
| 993.5   | 986.5   | 0.951577 | -0.121905107 | 0.955781 |
| 2393    | 2240.5  | 0.627485 | -0.489048658 | 0.703203 |
| 5471.5  | 5992    | 0.945193 | 0.142970391  | 0.995235 |
| 2771.51 | 3052.48 | 0.802111 | -0.43962997  | 0.729743 |
| 45.5    | 51.5    | 0.94338  | 0.12156198   | 0.971662 |
| 11524   | 11978.3 | 0.723339 | -0.510039467 | 0.689488 |
| 7438.5  | 6348    | 0.566214 | -0.661583782 | 0.724922 |
| 3411    | 2702    | 0.451826 | -0.841919193 | 0.678725 |
| 1702.52 | 1756.02 | 0.540007 | -0.592000248 | 0.505646 |
| 499     | 280     | 0.443295 | -0.937756443 | 0.947124 |
| 3842.38 | 3713.49 | 0.610415 | -0.934065601 | 0.634666 |
| 3080.44 | 3324.05 | 0.486609 | -1.228084607 | 0.434278 |
| 11      | 9       | 0.569483 | -1.289506617 | 0.689119 |
| 2710.5  | 2670.5  | 0.721555 | -0.468441609 | 0.735492 |
| 19815   | 19437.5 | 0.764579 | -0.434855487 | 0.781104 |
| 2600.5  | 2556.48 | 0.785191 | -0.326720991 | 0.80253  |
| 5979    | 4455    | 0.428447 | -0.706287847 | 0.775526 |
| 1446.5  | 1449.5  | 0.843549 | -0.385259624 | 0.842192 |
| 1055.5  | 1041.5  | 0.829245 | -0.40075664  | 0.838377 |
| 110.5   | 133     | 0.962536 | -0.073657042 | 0.811963 |
| 662     | 659.5   | 0.805257 | -0.386268948 | 0.808292 |
| 410     | 661.001 | 0.687542 | -0.586722959 | 0.298157 |
| 2685    | 2505    | 0.609722 | -0.533114087 | 0.686596 |
| 187.941 | 319.584 | 0.638912 | -1.623505115 | 0.367113 |
| 192.336 | 1087.61 | 0.652525 | 1.460233311  | 0.469406 |
| 11678   | 11246   | 0.460236 | -1.06158318  | 0.489805 |
| 3092.06 | 3090.49 | 0.813194 | -0.349667672 | 0.813623 |
| 44      | 50.5    | 1        | 0            | 0.91852  |
| 7.25333 | 6.4456  | 0.660081 | -0.688718486 | 0.753805 |
| 8.24667 | 11.5544 | 0.746953 | -0.721883583 | 0.526725 |
| 2       | 6       | 1        | 0            | 0.456444 |
| 28      | 35      | 0.664544 | -1.05246742  | 0.528608 |
| 8880    | 9353.5  | 0.637473 | -0.588744781 | 0.58752  |
| 28218   | 24376.5 | 0.515555 | -0.679729364 | 0.671229 |
| 27104.1 | 21743   | 0.542974 | -0.640302948 | 0.779191 |
| 10128.5 | 9568.61 | 0.68502  | -0.560975428 | 0.735626 |
| 3855    | 3672.99 | 0.562343 | -0.655716759 | 0.611273 |
| 42635.7 | 42869.7 | 0.519383 | -0.618306197 | 0.513328 |
| 22048.5 | 18015.2 | 0.396662 | -0.707956228 | 0.638306 |
| 12201   | 11405.8 | 0.725799 | -0.476608942 | 0.786582 |
| 13251.7 | 11955.1 | 0.653519 | -0.528642061 | 0.757437 |
| 11216.6 | 10736.1 | 0.717438 | -0.440356707 | 0.761077 |
| 11690.7 | 11992.5 | 0.801664 | -0.364301614 | 0.779599 |
| 12365.1 | 11864.5 | 0.615618 | -0.537008258 | 0.660548 |
| 2898.46 | 2841.86 | 0.834261 | -0.32485407  | 0.850001 |
| 2969.5  | 2961    | 0.763006 | -0.446222829 | 0.765439 |
| 10.5    | 12.5    | 0.664901 | -0.691877705 | 0.524625 |
| 187.5   | 188.5   | 0.808969 | -0.457989644 | 0.805339 |
| 519     | 645     | 0.923443 | -0.164722345 | 0.756756 |
| 969     | 959     | 0.781899 | -0.445632909 | 0.790054 |
| 501.5   | 481     | 0.935968 | -0.137215876 | 0.964776 |
| 438     | 543.5   | 0.785232 | -0.655845987 | 0.655027 |

|         |         |           |              |           |
|---------|---------|-----------|--------------|-----------|
| 89      | 56      | 0.726077  | -0.285906896 | 0.710118  |
| 133.5   | 119.5   | 0.946411  | 0.10922907   | 0.875612  |
| 4       | 4       | 0.703593  | -0.678071905 | 0.703593  |
| 0.5     | 0       | 0.308068  | #NUM!        | 1         |
| 0       | 0       | ?         | #DIV/0!      | ?         |
| 10      | 11      | 0.523549  | -1.514573173 | 0.467041  |
| 0       | 0.5     | 0.450185  | #DIV/0!      | 1         |
| 0       | 0       | 0.308068  | #DIV/0!      | 0.308068  |
| 0       | 0       | ?         | #DIV/0!      | ?         |
| 0       | 0       | ?         | #DIV/0!      | ?         |
| 9       | 8       | 0.3646    | -2.584962501 | 0.423694  |
| 2       | 0.5     | 0.450185  | -2           | 1         |
| 0       | 0.5     | 1         | #DIV/0!      | 0.308068  |
| 3       | 1.5     | 0.72755   | -0.584962501 | 0.860525  |
| 2       | 0.5     | 0.230584  | -2           | 1         |
| 0       | 0       | ?         | #DIV/0!      | ?         |
| 0.5     | 0       | 0.308068  | #NUM!        | 1         |
| 0       | 0       | ?         | #DIV/0!      | ?         |
| 0       | 0       | ?         | #DIV/0!      | ?         |
| 0       | 0       | ?         | #DIV/0!      | ?         |
| 0       | 0       | ?         | #DIV/0!      | ?         |
| 0       | 0       | ?         | #DIV/0!      | ?         |
| 1       | 1.5     | 1         | 0            | 0.710482  |
| 0.5     | 1.5     | 1         | 0            | 0.513713  |
| 5.5     | 6.5     | 0.786483  | -0.459431619 | 0.65555   |
| 7743.5  | 8223    | 0.827319  | -0.362743092 | 0.780928  |
| 73.5    | 55.5245 | 0.0900884 | -2.498012401 | 0.181006  |
| 1902    | 2545.99 | 0.507572  | -1.002297093 | 0.297546  |
| 239.5   | 164.5   | 0.549331  | -0.723972756 | 0.898397  |
| 165.5   | 143.5   | 0.545815  | -0.77823037  | 0.675188  |
| 329.5   | 315.5   | 0.756952  | -0.404132723 | 0.797644  |
| 72      | 274.999 | 0.742815  | -1.103835811 | 0.109219  |
| 6       | 13.5    | 0.320255  | -0.584962501 | 0.0110082 |
| 550.999 | 475.5   | 0.597161  | -0.713592761 | 0.727722  |
| 1470.51 | 1255.5  | 0.799696  | -0.317517509 | 0.947127  |
| 954.5   | 1008.5  | 0.922666  | -0.183497378 | 0.886362  |
| 538.5   | 562.5   | 0.815865  | -0.377574243 | 0.781522  |
| 938     | 978     | 0.871871  | -0.294128175 | 0.842794  |
| 3182.5  | 2753    | 0.746495  | -0.598741058 | 0.844564  |
| 137.5   | 128.5   | 0.874147  | -0.239101664 | 0.927768  |
| 181     | 118     | 0.615136  | -0.799406169 | 0.925449  |
| 5       | 7       | 0.776099  | 0.485426827  | 1         |
| 19201.7 | 14977.3 | 0.110776  | -1.431738851 | 0.240887  |
| 779.5   | 763     | 0.684746  | -0.414112398 | 0.709532  |
| 0       | 0       | 0.308068  | #DIV/0!      | 0.308068  |
| 58      | 55.5    | 0.516526  | -1.688055994 | 0.541212  |
| 13.5    | 23.5    | 0.891242  | 0.289506617  | 0.75157   |
| 0.5     | 0       | 0.308068  | #NUM!        | 1         |
| 553.5   | 557     | 0.580445  | -0.472194571 | 0.57239   |
| 118.5   | 127     | 0.950781  | -0.10084069  | 0.898813  |
| 1501.5  | 1531    | 0.856372  | -0.322168324 | 0.842548  |
| 137.5   | 200.5   | 0.36608   | 1.78545544   | 0.451459  |
| 528.31  | 195.87  | 0.428348  | -1.372914578 | 0.983199  |
| 269.602 | 150.901 | 0.397084  | -2.121128797 | 0.701409  |
| 42.5    | 55.5    | 0.825782  | -0.455194626 | 0.644369  |
| 3403.09 | 2037.38 | 0.47036   | -0.820833166 | 0.954571  |

|         |         |          |              |          |
|---------|---------|----------|--------------|----------|
| 2848.95 | 2251.02 | 0.798511 | -0.412940859 | 0.967875 |
| 2288.13 | 2166.22 | 0.643635 | -0.791490497 | 0.684626 |
| 36.9293 | 24.2643 | 0.66265  | -0.608304984 | 0.998885 |
| 2255.5  | 1737    | 0.363908 | -0.632428133 | 0.731823 |
| 227     | 198     | 0.777415 | -0.291273111 | 0.931674 |
| 1545.5  | 1468.5  | 0.33917  | -0.848183615 | 0.388113 |
| 0.5     | 0.5     | 0.450185 | 2            | 0.450185 |
| 814     | 755.999 | 0.840146 | -0.32680587  | 0.8957   |
| 33      | 31.5    | 0.405998 | -1.237039197 | 0.439842 |
| 2806    | 2508.5  | 0.464422 | -0.749098916 | 0.58073  |
| 566.999 | 505     | 0.924232 | -0.147202381 | 0.990335 |
| 1549.5  | 1961.5  | 0.980745 | -0.034867613 | 0.771393 |
| 1937.49 | 1727    | 0.775945 | -0.34963356  | 0.887271 |
| 775.5   | 843.5   | 0.403641 | -1.348684553 | 0.348    |
| 33.444  | 56.1483 | 0.793641 | -0.740254991 | 0.497807 |
| 0       | 0.5     | 1        | #DIV/0!      | 0.308068 |
| 470     | 469     | 0.901185 | -0.145197916 | 0.903364 |
| 2514.5  | 2283    | 0.753021 | -0.347323598 | 0.856836 |
| 464     | 420.5   | 0.843661 | -0.342281157 | 0.912445 |
| 2218.98 | 2372.08 | 0.751042 | -0.518065978 | 0.698044 |
| 143.5   | 143     | 0.801674 | -0.306925932 | 0.805166 |
| 766.999 | 757     | 0.901702 | -0.220043447 | 0.910699 |
| 6       | 10      | 0.927134 | -0.263034406 | 0.653517 |
| 901.185 | 913.439 | 0.120554 | -1.198296514 | 0.114828 |
| 33960   | 32533.4 | 0.659864 | -0.645317255 | 0.696254 |
| 27181.5 | 24485   | 0.82187  | -0.317635303 | 0.910405 |
| 2486.5  | 2135.5  | 0.59842  | -1.094405792 | 0.695436 |
| 428.5   | 496.5   | 0.82861  | -0.385599389 | 0.718772 |
| 1360.02 | 1318.98 | 0.705323 | -0.487563778 | 0.734414 |
| 8522.01 | 7362.53 | 0.857222 | -0.22638954  | 0.990907 |
| 5925    | 6178    | 0.82062  | -0.370522868 | 0.787963 |
| 4033    | 3987    | 0.709205 | -0.634174347 | 0.717904 |
| 32193.5 | 30992   | 0.821823 | -0.327388827 | 0.853936 |
| 66646.8 | 66323.3 | 0.714709 | -0.53784345  | 0.718865 |
| 9723.5  | 9583.5  | 0.66323  | -0.613697097 | 0.675975 |
| 653.5   | 710.003 | 0.679422 | -0.619031495 | 0.609219 |
| 380     | 323.5   | 0.565835 | -0.650992371 | 0.729315 |
| 5       | 7.5     | 0.734305 | 0.485426827  | 0.931682 |
| 3.5     | 2       | 0.432389 | -2.807354922 | 0.681777 |
| 10.5    | 8.5     | 0.478913 | -0.485426827 | 0.805463 |
| 286     | 181     | 0.844604 | -0.255989491 | 0.805628 |
| 440.5   | 393     | 0.95084  | 0.09964484   | 0.877353 |
| 12099.5 | 12016.5 | 0.522114 | -0.813209345 | 0.528278 |
| 4669.02 | 4057.5  | 0.412394 | -0.877150063 | 0.547182 |
| 17383.5 | 19230   | 0.903373 | -0.221825419 | 0.832669 |
| 1664.5  | 1853    | 0.877246 | -0.262081303 | 0.795868 |
| 1051.5  | 970     | 0.232169 | -0.914111823 | 0.300952 |
| 1436.5  | 1485.5  | 0.857957 | -0.29297007  | 0.832159 |
| 148     | 102.5   | 0.417711 | 1.401571432  | 0.346898 |
| 49      | 48      | 0.908199 | 0.21818017   | 0.896819 |
| 18      | 124     | 0.938571 | -0.777607579 | 0.294707 |
| 2       | 3.5     | 0.787312 | -1           | 0.514418 |
| 6.5     | 14      | 0.878923 | 0.387023123  | 0.679565 |
| 7       | 6       | 0.63263  | -0.807354922 | 0.74706  |
| 235     | 109     | 0.362719 | -1.843093945 | 0.801288 |
| 1       | 1.5     | 0.545627 | #NUM!        | 0.3832   |

|         |         |           |              |           |
|---------|---------|-----------|--------------|-----------|
| 18.8019 | 55.8795 | 0.854829  | -0.918128877 | 0.377313  |
| 18      | 11.5    | 0.626637  | -0.921997488 | 0.906912  |
| 681.5   | 1230.98 | 0.86106   | -0.402749625 | 0.471718  |
| 1267.5  | 1218    | 0.493261  | -0.683888542 | 0.535648  |
| 128.5   | 110.364 | 0.942768  | 0.113316524  | 0.845252  |
| 2204.55 | 2657.49 | 0.934022  | -0.184821738 | 0.823285  |
| 435.5   | 564     | 0.824285  | -0.47190816  | 0.652565  |
| 396     | 396.5   | 0.813293  | -0.298439742 | 0.812068  |
| 2738.37 | 3092.16 | 0.90583   | 0.210728477  | 0.983131  |
| 1125.5  | 940     | 0.665494  | -0.641494757 | 0.81283   |
| 2424    | 2761.5  | 0.713992  | -0.453640339 | 0.584455  |
| 0       | 0       | ?         | #DIV/0!      | ?         |
| 150.5   | 283     | 0.959732  | 0.128324097  | 0.674259  |
| 1617.5  | 1312.5  | 0.274295  | -1.030193377 | 0.46189   |
| 751.533 | 839.994 | 0.599757  | -0.644306543 | 0.49436   |
| 8414.37 | 8881.19 | 0.883053  | -0.271818729 | 0.845922  |
| 2131.5  | 2109.5  | 0.447621  | -0.670713095 | 0.459073  |
| 60.5    | 25      | 0.0041288 | -2.670935724 | 0.0941105 |
| 4146    | 4448    | 0.786831  | -0.439603564 | 0.730896  |
| 2371.5  | 2443.5  | 0.754346  | -0.499057153 | 0.730311  |
| 1251.01 | 1316    | 0.796839  | -0.396340861 | 0.754901  |
| 0       | 0       | ?         | #DIV/0!      | ?         |
| 1804    | 1993    | 0.913944  | -0.20089431  | 0.845647  |
| 727.5   | 725.5   | 0.991158  | 0.015778093  | 0.988948  |
| 1402    | 1437.5  | 0.763742  | -0.607780583 | 0.747232  |
| 1951.29 | 1815.32 | 0.658467  | -0.64659162  | 0.719567  |
| 0.5     | 0       | 1         | 0            | 0.450185  |
| 96.5    | 152.5   | 0.98741   | 0.029594782  | 0.675237  |
| 1107.5  | 927     | 0.425123  | -0.802478202 | 0.60919   |
| 2770    | 1809.5  | 0.338732  | -0.696311554 | 0.921501  |
| 7995    | 5184.5  | 0.610173  | -0.411706638 | 0.828645  |
| 3795.93 | 2064.48 | 0.433378  | -0.830109205 | 0.971778  |
| 11177.5 | 10241   | 0.687682  | -0.474253903 | 0.77643   |
| 1929.5  | 2060.47 | 0.82779   | -0.382123064 | 0.779356  |
| 4990.3  | 5213.84 | 0.628738  | -0.59236507  | 0.586087  |
| 1538.5  | 1630.5  | 0.351834  | -1.294987096 | 0.312731  |
| 536.5   | 586.5   | 0.966546  | 0.066991959  | 0.967857  |
| 1070.5  | 1174.5  | 0.87738   | -0.271278786 | 0.809594  |
| 593.585 | 639.716 | 0.323172  | -0.748597638 | 0.254372  |
| 1506.5  | 1448    | 0.862321  | -0.260642273 | 0.894324  |
| 598.001 | 616.999 | 0.124288  | -0.702403647 | 0.105591  |
| 127.5   | 175     | 0.309797  | -0.746425923 | 0.100834  |
| 628     | 521.5   | 0.476249  | -0.56840259  | 0.723167  |
| 112     | 113.5   | 0.996857  | -0.006455022 | 0.987428  |
| 91      | 85      | 0.426311  | -0.793549123 | 0.494847  |
| 74      | 83      | 0.79641   | -0.415037499 | 0.703468  |
| 204.758 | 173.293 | 0.767593  | -0.472667012 | 0.893519  |
| 654.498 | 743.001 | 0.822862  | -0.358477823 | 0.719782  |
| 1247.01 | 1260.52 | 0.79902   | -0.391714502 | 0.790191  |
| 2       | 2       | 0.710482  | -1           | 0.710482  |
| 0       | 0       | ?         | #DIV/0!      | ?         |
| 262.5   | 336.5   | 0.966732  | -0.087806381 | 0.810676  |
| 1214.5  | 1220    | 0.931038  | -0.133707268 | 0.927525  |
| 3014.5  | 2954.5  | 0.695295  | -0.565472749 | 0.712675  |
| 2754    | 2980    | 0.934046  | -0.137005948 | 0.874892  |
| 1911    | 1955    | 0.922383  | -0.176877762 | 0.906996  |

|         |         |          |              |           |
|---------|---------|----------|--------------|-----------|
| 3937    | 3498.5  | 0.960625 | -0.071168234 | 0.948285  |
| 1716.5  | 1562.5  | 0.777671 | -0.29404303  | 0.884095  |
| 440.5   | 417     | 0.69129  | -0.658876897 | 0.733345  |
| 271.5   | 213     | 0.573597 | -0.412383046 | 0.93838   |
| 1069.5  | 1038.5  | 0.930966 | -0.084010308 | 0.966288  |
| 1283.01 | 1185.02 | 0.770398 | -0.373315187 | 0.845421  |
| 1255.5  | 1142.5  | 0.726535 | -0.308204376 | 0.851153  |
| 451.5   | 425     | 0.942372 | -0.095774646 | 0.995025  |
| 1661    | 1548.48 | 0.961166 | -0.068944317 | 0.982452  |
| 628     | 654.5   | 0.954105 | 0.097696674  | 0.981733  |
| 1115.5  | 1034.5  | 0.776384 | -0.393004661 | 0.842792  |
| 2272.42 | 1895.02 | 0.370419 | -0.836563849 | 0.559567  |
| 1503.5  | 1179.99 | 0.860185 | -0.299068777 | 0.978966  |
| 2011.5  | 1970    | 0.998369 | 0.003939346  | 0.98606   |
| 0       | 0       | ?        | #DIV/0!      | ?         |
| 5612.45 | 5750.67 | 0.892402 | 0.272705654  | 0.905035  |
| 193     | 133     | 0.591072 | -0.864536583 | 0.864266  |
| 3891.5  | 3956    | 0.933011 | -0.157719523 | 0.922339  |
| 2788.91 | 2783.43 | 0.970602 | -0.060442963 | 0.972009  |
| 7690    | 8388    | 0.918084 | -0.18329511  | 0.856596  |
| 2484.49 | 2446.5  | 0.889614 | -0.269248276 | 0.899441  |
| 20.5    | 6.5     | 0.771925 | 0.500428991  | 0.462818  |
| 3.5     | 6.5     | 0.611155 | 0.652076697  | 0.795691  |
| 4792.53 | 5683.99 | 0.76841  | -0.333672285 | 0.583476  |
| 120.5   | 152     | 0.898356 | -0.233409237 | 0.727999  |
| 1583    | 669.499 | 0.865573 | 0.225635846  | 0.476108  |
| 2096    | 2597.5  | 0.912147 | -0.132556194 | 0.685393  |
| 244     | 90.9999 | 0.401456 | 1.890239355  | 0.315963  |
| 1388    | 1391    | 0.778397 | -0.420591674 | 0.776581  |
| 10.2143 | 4.5882  | 0.917112 | -0.152547765 | 0.646675  |
| 2.5     | 5       | 1        | 0            | 0.606453  |
| 313.5   | 608.5   | 0.977783 | 0.076184829  | 0.655004  |
| 97      | 205     | 0.973414 | -0.084213004 | 0.509518  |
| 294.5   | 332     | 0.637867 | -0.85339567  | 0.550461  |
| 6007.99 | 6916.75 | 0.858442 | -0.353709129 | 0.763608  |
| 25.5    | 17      | 0.554763 | -0.91753784  | 0.859033  |
| 46.5    | 34.5    | 0.851328 | 0.355658952  | 0.720899  |
| 8912.45 | 9619.88 | 0.948586 | -0.104230717 | 0.890459  |
| 573.5   | 473.5   | 0.620875 | -1.229959021 | 0.727557  |
| 2       | 3       | 0.18169  | #NUM!        | 0.0805096 |
| 4772.5  | 4494.5  | 0.525065 | -0.677014266 | 0.587507  |
| 256.5   | 235     | 0.983311 | 0.027852121  | 0.911819  |
| 1130.01 | 1254.49 | 0.775415 | -0.43822836  | 0.687565  |
| 1146    | 1130.01 | 0.816417 | -0.362308433 | 0.827658  |
| 47.5    | 42.5    | 0.805994 | -0.341036918 | 0.901847  |
| 17.5    | 25.5    | 0.721817 | -0.807354922 | 0.47804   |
| 552.399 | 476.5   | 0.973426 | -0.061229886 | 0.938781  |
| 44.1007 | 25.5    | 0.614538 | 0.728169612  | 0.425486  |
| 415.001 | 416     | 0.925853 | -0.165593441 | 0.924216  |
| 0.5     | 0       | 0.308068 | 1            | 0.0917211 |
| 60.5    | 58      | 0.748754 | 0.438688767  | 0.721329  |
| 275.5   | 238.5   | 0.930923 | -0.114386662 | 0.947329  |
| 953.5   | 983     | 0.599847 | -0.747342009 | 0.573761  |
| 2.5     | 2       | 1        | 0            | 0.889735  |
| 1       | 5       | 0.91071  | -1           | 0.35288   |
| 3       | 2.5     | 0.690256 | -1           | 0.78878   |

|         |         |           |              |          |
|---------|---------|-----------|--------------|----------|
| 1       | 0       | 0.308068  | #NUM!        | 1        |
| 67.5    | 73.5    | 0.927438  | 0.171111916  | 0.978616 |
| 31.6179 | 28.6412 | 0.683792  | -0.621933153 | 0.764199 |
| 6.5     | 3.5     | 0.466905  | -1.378511623 | 0.848719 |
| 184     | 107     | 0.689394  | -0.575194724 | 0.911973 |
| 4       | 5       | 0.764036  | -0.678071905 | 0.622002 |
| 37      | 29      | 0.66704   | -0.750021747 | 0.838708 |
| 0       | 0.5     | 1         | #DIV/0!      | 0.308068 |
| 554.002 | 608.497 | 0.989451  | -0.024967084 | 0.929116 |
| 860.499 | 1580    | 0.928886  | -0.251179864 | 0.588335 |
| 0.5     | 1       | 0.0954145 | 3.321928095  | 0.122073 |
| 9       | 11      | 0.814626  | -0.469485283 | 0.676498 |
| 10      | 15.5    | 0.748813  | 0.722466024  | 0.960334 |
| 0       | 0.5     | 0.450185  | #DIV/0!      | 1        |
| 0       | 0       | ?         | #DIV/0!      | ?        |
| 5.5     | 4       | 0.273013  | -1.459431619 | 0.499897 |
| 47.5    | 37.5    | 0.878292  | -0.247927513 | 0.959209 |
| 3       | 4.5     | 0.686235  | -1.584962501 | 0.492587 |
| 1410    | 1585.5  | 0.935691  | -0.155417758 | 0.858257 |
| 64      | 55      | 0.935011  | -0.142019005 | 0.967463 |
| 696.5   | 429     | 0.362088  | -1.510288888 | 0.691143 |
| 12.5    | 12.5    | 0.666479  | 0.604071324  | 0.666479 |
| 113     | 83      | 0.785063  | 0.455945443  | 0.644537 |
| 0       | 0       | ?         | #DIV/0!      | ?        |
| 62.5    | 50      | 0.95776   | -0.058893689 | 0.832874 |
| 0       | 2.5     | 0.724378  | #DIV/0!      | 0.219102 |
| 0       | 0       | ?         | #DIV/0!      | ?        |
| 4       | 8.5     | 0.647196  | -1.415037499 | 0.250939 |
| 0       | 0.5     | 0.450185  | #DIV/0!      | 1        |
| 227.5   | 141.5   | 0.614175  | 0.674103003  | 0.426986 |
| 1       | 0       | 0.0917211 | 1.584962501  | 0.034897 |
| 12      | 17.5    | 0.980001  | -0.061400545 | 0.765486 |
| 0       | 0       | ?         | #DIV/0!      | ?        |
| 0.5     | 0.5     | 0.651448  | 1            | 0.651448 |
| 51      | 58.5    | 0.848339  | 0.349942471  | 0.929057 |
| 0.5     | 0       | 1         | 0            | 0.450185 |
| 6.5     | 4       | 0.72386   | -0.700439718 | 1        |
| 51.5    | 86      | 0.719869  | -0.401098308 | 0.23502  |
| 0       | 0       | ?         | #DIV/0!      | ?        |
| 16      | 27      | 0.985667  | -0.04580369  | 0.684215 |
| 0.5     | 0       | 0.308068  | #NUM!        | 1        |
| 2       | 4       | 1         | 0            | 0.651448 |
| 156.5   | 166     | 0.979411  | -0.046844863 | 0.94037  |
| 0       | 0       | ?         | #DIV/0!      | ?        |
| 25.5    | 25.5    | 0.880598  | 0.304854582  | 0.880598 |
| 0.5     | 1.5     | 0.613399  | 1.584962501  | 1        |
| 905.5   | 1219.5  | 0.913093  | -0.249870604 | 0.731134 |
| 0       | 1       | 1         | #DIV/0!      | 0.308068 |
| 0       | 0       | ?         | #DIV/0!      | ?        |
| 0.5     | 0.5     | 0.651448  | 1            | 0.651448 |
| 0       | 0       | ?         | #DIV/0!      | ?        |
| 0       | 8.5     | 1         | #DIV/0!      | 0.207565 |
| 805.5   | 742     | 0.970643  | 0.061363231  | 0.917583 |
| 771.501 | 738.501 | 0.976303  | 0.046024448  | 0.945089 |
| 15021.5 | 14219   | 0.610693  | -0.609858883 | 0.664894 |
| 6060    | 5886.5  | 0.592491  | -0.596795284 | 0.622651 |

|         |         |          |              |           |
|---------|---------|----------|--------------|-----------|
| 2495.5  | 2417.5  | 0.476593 | -0.676396334 | 0.511096  |
| 148     | 132     | 0.843657 | 0.270326898  | 0.764767  |
| 104     | 98      | 0.782928 | -0.316735426 | 0.844946  |
| 5529.5  | 5494    | 0.700124 | -0.652803697 | 0.705028  |
| 1770    | 2200.5  | 0.219825 | -0.820866852 | 0.0947937 |
| 798     | 637     | 0.656084 | -0.445488082 | 0.913156  |
| 486.5   | 514     | 0.924663 | -0.143297786 | 0.88006   |
| 191.5   | 177.5   | 0.623544 | -0.52050465  | 0.706962  |
| 1485.5  | 1664.5  | 0.760436 | -0.499872443 | 0.669587  |
| 9517.9  | 10056.7 | 0.581821 | -0.659555152 | 0.528724  |
| 6       | 13      | 0.867496 | 0.415037499  | 0.680712  |
| 159     | 183.5   | 0.988137 | 0.031412953  | 0.928972  |
| 1928.5  | 1923.5  | 0.958283 | 0.093763836  | 0.956675  |
| 3078.44 | 3529.62 | 0.770903 | -0.559366239 | 0.67429   |
| 3       | 1       | 0.409442 | -2.584962501 | 0.860525  |
| 197     | 262.5   | 0.937181 | -0.174968593 | 0.759837  |
| 749     | 657.5   | 0.790443 | -0.39021222  | 0.89703   |
| 194.5   | 174.5   | 0.920715 | -0.131951131 | 0.985973  |
| 549     | 517     | 0.787219 | -0.364260408 | 0.84145   |
| 1820.5  | 1611.5  | 0.727579 | -0.465634138 | 0.837635  |
| 746.501 | 778.998 | 0.798331 | -0.452083738 | 0.767063  |
| 34      | 33      | 0.648783 | -0.878009476 | 0.66931   |
| 31.5    | 65      | 0.439552 | 1.702200176  | 0.670748  |
| 1032.5  | 1130.5  | 0.878036 | -0.307157827 | 0.819035  |
| 1234.5  | 1171.5  | 0.413768 | -0.727646579 | 0.470114  |
| 227.5   | 289.5   | 0.851473 | -0.424581272 | 0.701518  |
| 575.5   | 538.5   | 0.918662 | -0.211570077 | 0.956915  |
| 1919    | 1782.5  | 0.706534 | -0.795003326 | 0.753076  |
| 329     | 366.5   | 0.86742  | -0.334037777 | 0.796375  |
| 577.5   | 606.5   | 0.850272 | -0.323490299 | 0.813807  |
| 728.5   | 718     | 0.882413 | -0.237322134 | 0.893477  |
| 108.5   | 161.5   | 0.764187 | -0.717157113 | 0.514021  |
| 1233.49 | 1235.39 | 0.830213 | -0.383863706 | 0.829118  |
| 1164    | 1074.5  | 0.817107 | -0.416691018 | 0.872246  |
| 747     | 620     | 0.85584  | -0.265353852 | 0.998262  |
| 2386.5  | 2395    | 0.842349 | -0.356881517 | 0.83984   |
| 25      | 48.5    | 0.669064 | -1.120294234 | 0.286297  |
| 0       | 1.5     | 0.724378 | #DIV/0!      | 0.495025  |
| 264.5   | 332.5   | 0.750056 | -0.583599539 | 0.579788  |
| 189.5   | 228     | 0.610319 | -1.280651819 | 0.501034  |
| 172.5   | 187     | 0.965476 | -0.072900547 | 0.906871  |
| 4771.48 | 4884.52 | 0.946495 | 0.128507044  | 0.96008   |
| 5702.5  | 6318.5  | 0.886557 | -0.283699471 | 0.819417  |
| 1662    | 1661    | 0.803521 | -0.347765485 | 0.804055  |
| 735     | 683     | 0.72368  | -0.481310719 | 0.789669  |
| 5586.5  | 6265.5  | 0.825256 | -0.433534121 | 0.747093  |
| 1444.5  | 1541.5  | 0.970469 | 0.067795001  | 0.988311  |
| 1428.48 | 1489.5  | 0.845089 | -0.317886382 | 0.812515  |
| 3123.5  | 3184    | 0.803137 | -0.410195849 | 0.78828   |
| 2593.5  | 2222.5  | 0.80426  | -0.362331696 | 0.929354  |
| 544     | 603.5   | 0.845408 | -0.352753221 | 0.770304  |
| 627.259 | 690.829 | 0.953038 | -0.110103515 | 0.888737  |
| 3277.5  | 3308.5  | 0.832267 | -0.368051306 | 0.825395  |
| 2921.48 | 2833.5  | 0.683013 | -0.48252015  | 0.714187  |
| 852     | 633     | 0.462513 | -0.761729834 | 0.774298  |
| 521     | 544.5   | 0.859293 | -0.316062644 | 0.827752  |



|         |         |          |              |          |
|---------|---------|----------|--------------|----------|
| 1054.99 | 1118.51 | 0.883338 | -0.241308483 | 0.838584 |
| 5349.49 | 5693.43 | 0.796115 | -0.423786594 | 0.747079 |
| 14708   | 14262   | 0.917446 | -0.149139555 | 0.942851 |
| 8088.5  | 8420    | 0.843361 | -0.315099573 | 0.81152  |
| 2852    | 3231    | 0.879167 | -0.288551432 | 0.793071 |
| 4644.5  | 4758    | 0.866793 | -0.288575045 | 0.849154 |
| 737     | 717.5   | 0.690157 | -0.518493542 | 0.715401 |
| 539.003 | 497.997 | 1        | 0            | 0.952572 |
| 18      | 21.5    | 1        | 0            | 0.871616 |
| 406     | 387.5   | 0.943977 | -0.103093493 | 0.98097  |
| 334.5   | 300     | 0.780521 | -0.411447811 | 0.870036 |
| 452.5   | 406     | 0.987501 | -0.02249236  | 0.929608 |
| 1088.5  | 1206.5  | 0.980111 | -0.044414829 | 0.909288 |
| 42.5    | 35      | 0.89105  | -0.180572246 | 0.945324 |
| 337     | 415.5   | 0.938369 | 0.14255403   | 0.923466 |
| 43.5    | 55.5    | 0.262931 | -2.742503778 | 0.166247 |
| 4952.5  | 5453.5  | 0.958924 | -0.090150825 | 0.890792 |
| 791.5   | 1150    | 0.962318 | 0.098624018  | 0.799729 |
| 966     | 1315    | 0.896491 | -0.310399861 | 0.712368 |
| 407.5   | 457     | 0.626009 | -1.304334035 | 0.561124 |
| 145.5   | 137.5   | 0.828406 | -0.403515629 | 0.866425 |
| 443     | 366.5   | 0.395755 | -0.735880453 | 0.613786 |
| 1853.5  | 2056.96 | 0.964152 | 0.074708329  | 0.961814 |
| 297.5   | 305.5   | 0.920377 | -0.172357204 | 0.9015   |
| 4460.96 | 5078.62 | 0.802478 | -0.476534787 | 0.710933 |
| 13      | 19.5    | 0.600826 | -1.115477217 | 0.342709 |
| 139.5   | 145.5   | 0.469145 | -1.047305715 | 0.436589 |
| 509.001 | 443     | 0.892738 | -0.208526472 | 0.996066 |
| 1299    | 1027    | 0.565733 | -0.833410711 | 0.758723 |
| 4754.5  | 4256.5  | 0.634638 | -0.776026234 | 0.719673 |
| 8.5     | 13      | 0.7746   | 0.497499659  | 0.934323 |
| 1273.49 | 1409.5  | 0.99068  | -0.013075721 | 0.881068 |
| 230.5   | 221     | 0.867723 | -0.241292627 | 0.902795 |
| 931     | 921.5   | 0.699849 | -0.517232111 | 0.709288 |
| 70.5    | 64.5    | 0.652026 | -0.872764812 | 0.712296 |
| 807     | 678.5   | 0.827987 | -0.354928668 | 0.953042 |
| 2125    | 1632.5  | 0.707731 | -0.68637854  | 0.883087 |
| 1631.02 | 1508.49 | 0.973512 | -0.05730903  | 0.975389 |
| 2289.51 | 1852.5  | 0.489711 | -1.227864355 | 0.636797 |
| 2968.83 | 2712.62 | 0.414786 | -1.694020079 | 0.469296 |
| 1658.5  | 1221.5  | 0.62557  | -0.644454356 | 0.893503 |
| 1829    | 1956    | 0.453941 | -0.705625455 | 0.38603  |
| 2435.01 | 2192.53 | 0.26273  | -0.863849581 | 0.36254  |
| 1157.51 | 1126.01 | 0.513202 | -0.973456044 | 0.535138 |
| 8.5     | 14.5    | 0.408425 | -1.765534746 | 0.151016 |
| 920.498 | 903.999 | 0.718983 | -0.458253491 | 0.736389 |
| 965     | 840     | 0.942781 | -0.097401509 | 0.943687 |
| 217.5   | 132.5   | 0.426563 | 1.407548417  | 0.339081 |
| 221.5   | 220     | 0.832006 | 0.373744038  | 0.828251 |
| 497.999 | 360.499 | 0.305321 | -0.945984146 | 0.635787 |
| 207.5   | 220     | 0.903524 | -0.213151749 | 0.861776 |
| 821     | 748.5   | 0.76227  | -0.429756001 | 0.841646 |
| 596.5   | 642     | 0.919342 | -0.193854885 | 0.870955 |
| 5258.32 | 4941.92 | 0.686716 | -0.574145191 | 0.740585 |
| 1017    | 979.5   | 0.799507 | -0.396712841 | 0.829453 |
| 1970    | 1894.5  | 0.912472 | -0.180352563 | 0.940916 |

|         |         |          |              |          |
|---------|---------|----------|--------------|----------|
| 142.5   | 265.5   | 0.913898 | -0.315614321 | 0.571352 |
| 543     | 1080.5  | 0.701657 | -1.220622243 | 0.332514 |
| 1517    | 1680.5  | 0.823046 | -0.45652206  | 0.755734 |
| 6314.07 | 6690.28 | 0.637706 | -1.048101685 | 0.601221 |
| 1596    | 1769.5  | 0.80256  | 0.465336245  | 0.857823 |
| 1278.5  | 1343    | 0.795678 | 0.506709205  | 0.819471 |
| 1619.51 | 1890.03 | 0.971728 | -0.07539328  | 0.879663 |
| 11054.5 | 11830.5 | 0.877434 | -0.25703208  | 0.825838 |
| 414.5   | 415     | 0.781367 | -0.416778833 | 0.780358 |
| 11      | 9.5     | 0.470688 | -1.289506617 | 0.57152  |
| 21778.7 | 21792.2 | 0.260674 | -0.843601074 | 0.260143 |
| 63.5    | 115.5   | 0.722306 | -0.759865996 | 0.326071 |
| 6517    | 9870.5  | 0.983885 | -0.035521528 | 0.660386 |
| 142.5   | 151.5   | 0.819374 | -0.36691555  | 0.77055  |
| 7720    | 7341.5  | 0.818015 | -0.35345528  | 0.858299 |
| 2564.5  | 1679.5  | 0.547809 | 0.976462635  | 0.427078 |
| 1116.87 | 1582.41 | 0.877946 | 0.316764862  | 0.91458  |
| 42      | 9       | 0.884261 | 0.177538186  | 0.348618 |
| 0       | 0       | ?        | #DIV/0!      | ?        |
| 37.5    | 15      | 0.90176  | -0.184424571 | 0.628726 |
| 63.5    | 69.5    | 0.589225 | -0.944290567 | 0.522881 |
| 1.5     | 3       | 1        | 0            | 0.625646 |
| 17674   | 16286.5 | 0.927653 | -0.10890076  | 0.994217 |
| 11170.5 | 10263   | 0.556498 | -0.634727432 | 0.645686 |
| 225.5   | 196     | 0.710305 | -0.446296216 | 0.84879  |
| 1675.5  | 1557    | 0.46566  | -0.717437635 | 0.543543 |
| 2081.01 | 2521.02 | 0.691607 | -0.909977199 | 0.570766 |
| 542.999 | 622.499 | 0.86871  | -0.32491422  | 0.776513 |
| 611.5   | 654.5   | 0.936611 | -0.138565587 | 0.888329 |
| 3716.38 | 1889.63 | 0.975041 | 0.049955806  | 0.646594 |
| 778.5   | 836.5   | 0.854501 | 0.356896465  | 0.892692 |
| 4441.05 | 5129.36 | 0.766586 | -0.658940001 | 0.675359 |
| 73.5    | 67.5    | 0.826686 | -0.405256478 | 0.883654 |
| 3802.5  | 4200.5  | 0.806085 | -0.480427328 | 0.737972 |
| 1687.49 | 1414.5  | 0.836469 | -0.364222272 | 0.954579 |
| 1418.5  | 1416.5  | 0.667735 | -0.544595995 | 0.669089 |
| 3076    | 3149.5  | 0.863973 | -0.268861966 | 0.845211 |
| 2671.5  | 2341    | 0.77106  | -0.415847775 | 0.88225  |
| 74      | 55.5    | 0.368687 | -2.565597176 | 0.514009 |
| 12987   | 11868.5 | 0.800498 | -0.466412286 | 0.861496 |
| 1958.51 | 2692.01 | 0.815178 | -0.558872717 | 0.619135 |
| 3350.62 | 3574.55 | 0.846302 | -0.351544679 | 0.800186 |
| 398.499 | 454.001 | 0.973232 | -0.06667965  | 0.89119  |
| 47      | 40.5    | 0.397098 | -2.306661338 | 0.474971 |
| 2277.5  | 2470    | 0.909085 | -0.211454096 | 0.853529 |
| 40      | 33      | 0.664093 | -0.96437609  | 0.77847  |
| 154.5   | 150     | 0.931801 | -0.121715908 | 0.956305 |
| 1746    | 2037    | 0.757304 | -0.553698287 | 0.641798 |
| 2626.5  | 2403    | 0.898405 | 0.226975581  | 0.848467 |
| 128.5   | 117.5   | 0.658084 | -0.729500144 | 0.726663 |
| 353     | 224     | 0.79492  | -0.21559686  | 0.674507 |
| 608.5   | 735.5   | 0.868592 | -0.367999492 | 0.751541 |
| 1192    | 1101.5  | 0.759769 | -0.386278506 | 0.835271 |
| 2881.5  | 3431.5  | 0.96699  | -0.087728849 | 0.861242 |
| 2454.5  | 2698    | 0.769041 | -0.592771623 | 0.70541  |
| 459     | 419     | 0.519064 | -0.741688004 | 0.60827  |

|         |         |          |              |          |
|---------|---------|----------|--------------|----------|
| 2151.86 | 2270.43 | 0.87569  | -0.286079523 | 0.838334 |
| 281.5   | 243.464 | 0.623177 | -0.586244327 | 0.766567 |
| 677     | 696.5   | 0.928789 | -0.177804587 | 0.911203 |
| 873.5   | 856.5   | 0.871028 | -0.277809273 | 0.885193 |
| 1597    | 1584    | 0.850044 | -0.301298595 | 0.856408 |
| 2063    | 1446.5  | 0.454695 | -1.690855985 | 0.660457 |
| 26.5    | 19      | 0.575588 | -1.142957954 | 0.782166 |
| 6784.96 | 5550.79 | 0.407608 | -1.211469189 | 0.56029  |
| 0       | 0       | 0.308068 | #DIV/0!      | 0.308068 |
| 289.5   | 355.5   | 0.676889 | 0.757745512  | 0.77815  |
| 3317.5  | 3206    | 0.721371 | -0.748243812 | 0.743192 |
| 1705.67 | 2462.55 | 0.975555 | -0.061674544 | 0.725258 |
| 835     | 1049.01 | 0.592857 | -0.979410821 | 0.4314   |
| 3279.66 | 2959.84 | 0.6672   | -0.742633721 | 0.742761 |
| 855     | 710     | 0.986958 | 0.026748299  | 0.869675 |
| 2123    | 2076.5  | 0.789185 | -0.426179813 | 0.806656 |
| 8064.28 | 7758.61 | 0.658078 | -0.580853671 | 0.693949 |
| 3702.5  | 3352.5  | 0.610458 | -0.734694399 | 0.694538 |
| 470     | 474     | 0.91098  | 0.197624516  | 0.91611  |
| 961.5   | 1170    | 0.994714 | -0.014325284 | 0.879437 |
| 369.5   | 357     | 0.987472 | 0.019391354  | 0.956184 |
| 654     | 718     | 0.831557 | -0.383040935 | 0.763664 |
| 131.5   | 117.5   | 0.718569 | -0.507537529 | 0.816005 |
| 1593.5  | 1538.01 | 0.843636 | -0.310980897 | 0.871294 |
| 5658.5  | 6932.5  | 0.73156  | -0.389722346 | 0.515744 |
| 737.5   | 680.5   | 0.738509 | -0.464453101 | 0.809309 |
| 94      | 108.5   | 0.921019 | 0.186878135  | 0.990864 |
| 99      | 83.5    | 0.782074 | 0.484385546  | 0.70202  |
| 1435.5  | 1615    | 0.714582 | -0.862542159 | 0.642868 |
| 5.5     | 6       | 0.533975 | -1.137503524 | 0.473565 |
| 640.5   | 661     | 0.81584  | -0.420679646 | 0.793314 |
| 120     | 94      | 0.54583  | -1.292180751 | 0.695983 |
| 1079.5  | 1061.5  | 0.776142 | -0.422406749 | 0.790295 |
| 158.5   | 202.5   | 0.391628 | -2.401448435 | 0.27259  |
| 481.5   | 722     | 0.919814 | -0.219648469 | 0.653839 |
| 1149.5  | 1131.63 | 0.728771 | -0.407699848 | 0.744944 |
| 57      | 68      | 0.793472 | -0.623436649 | 0.687543 |
| 21.3863 | 42.1213 | 0.44718  | -2.450067084 | 0.152462 |
| 451.549 | 428.86  | 0.646024 | -1.135315975 | 0.675675 |
| 190.066 | 187.018 | 0.994083 | 0.012236967  | 0.982951 |
| 56      | 76      | 0.874031 | 0.290677161  | 0.924101 |
| 254     | 269.5   | 0.792267 | -0.45340931  | 0.747523 |
| 309.5   | 233     | 0.758946 | 0.521724611  | 0.634834 |
| 1652.49 | 1488.5  | 0.51584  | -1.209637644 | 0.587234 |
| 4732.24 | 4264.92 | 0.447705 | -1.266893057 | 0.521371 |
| 124     | 170.5   | 0.732174 | -1.023458973 | 0.560395 |
| 239.001 | 261     | 0.615525 | -1.433265664 | 0.56767  |
| 296.377 | 274.521 | 0.583478 | -1.217921009 | 0.630795 |
| 445.623 | 534.479 | 0.790732 | -0.594683332 | 0.67609  |
| 1067.5  | 725     | 0.447586 | -1.631660182 | 0.677649 |
| 107     | 199.5   | 0.901129 | 0.280900827  | 0.710602 |
| 143.5   | 167     | 0.62425  | -1.410019425 | 0.541495 |
| 0       | 0.5     | 0.329316 | #DIV/0!      | 0.495025 |
| 9.5     | 4.5     | 0.545226 | -1.440572591 | 0.916914 |
| 11.5    | 10      | 0.784836 | -0.353636955 | 0.912519 |
| 97.5    | 35      | 0.528423 | 0.924051147  | 0.310045 |

|         |         |          |              |          |
|---------|---------|----------|--------------|----------|
| 81.5    | 255.5   | 0.921961 | -0.38294387  | 0.358815 |
| 894.5   | 606.5   | 0.818536 | -0.352696432 | 0.911146 |
| 58      | 54.5    | 0.833461 | -0.398549376 | 0.874466 |
| 3       | 9       | 0.869293 | 0.584962501  | 0.628409 |
| 12.5    | 32      | 0.891079 | -0.556393349 | 0.446082 |
| 186.5   | 111.5   | 0.571932 | -1.003873009 | 0.908311 |
| 255.5   | 207.5   | 0.917598 | 0.197577373  | 0.814293 |
| 274.5   | 253.5   | 0.796922 | -0.500749497 | 0.848726 |
| 420.5   | 452     | 0.572578 | -1.491960316 | 0.531698 |
| 0.5     | 0.5     | 1        | 0            | 1        |
| 13.5    | 21.5    | 0.88506  | 0.199308808  | 0.66936  |
| 480.503 | 322.5   | 0.346675 | -2.127041915 | 0.568467 |
| 345.5   | 465.006 | 0.977143 | -0.05686817  | 0.777246 |
| 0.5     | 1.5     | 0.724378 | #NUM!        | 0.329316 |
| 136     | 114.5   | 0.742235 | -0.636251729 | 0.853701 |
| 113     | 79      | 0.757182 | 0.483601786  | 0.594007 |
| 181     | 378     | 0.782918 | -0.899933045 | 0.387849 |
| 165     | 199.5   | 0.725866 | -0.744270395 | 0.599734 |
| 29.5    | 28.5    | 0.526143 | -1.490325627 | 0.546648 |
| 416     | 408.5   | 0.864929 | -0.272079545 | 0.878916 |
| 414.5   | 560.5   | 0.478332 | -2.66180529  | 0.33503  |
| 4.5     | 17      | 0.724114 | -2.169925001 | 0.17446  |
| 3.5     | 6.5     | 0.497208 | -2.807354922 | 0.221048 |
| 243.5   | 275.5   | 0.532512 | -1.633157213 | 0.462696 |
| 207.5   | 605.5   | 0.973569 | 0.120016097  | 0.502902 |
| 85.5    | 91.5    | 0.633789 | -1.417852515 | 0.598036 |
| 332.499 | 420     | 0.706679 | -0.997827824 | 0.572116 |
| 1       | 1.5     | 1        | 0            | 0.710482 |
| 13.5    | 18      | 0.766045 | -0.667424661 | 0.579838 |
| 890     | 295     | 0.720988 | 0.32839759   | 0.251048 |
| 96.5    | 118.5   | 0.679362 | -0.697639274 | 0.519731 |
| 203     | 186.5   | 0.994643 | -0.010699889 | 0.946498 |
| 921.992 | 843.496 | 0.664246 | -1.093729599 | 0.71405  |
| 419     | 443.5   | 0.888592 | 0.275035503  | 0.919411 |
| 78.9999 | 118.5   | 0.793072 | -0.445797927 | 0.469517 |
| 48.5    | 106.5   | 0.743091 | -1.512450001 | 0.382326 |
| 110     | 117.5   | 0.739198 | -0.581687369 | 0.68956  |
| 233     | 256     | 0.69733  | -0.704314808 | 0.628089 |
| 444     | 446.5   | 0.435287 | -2.614506776 | 0.432536 |
| 7       | 9       | 0.880047 | 0.280107919  | 0.959804 |
| 417.499 | 405.501 | 0.590303 | -1.457701418 | 0.606359 |
| 611.501 | 774.497 | 0.779925 | -0.67312828  | 0.636541 |
| 17.5    | 21.5    | 0.485823 | -0.881355504 | 0.319925 |
| 20.3364 | 25.7412 | 0.620392 | -1.003565667 | 0.461517 |
| 0       | 0       | 0.308068 | #DIV/0!      | 0.308068 |
| 1038    | 928.5   | 0.556275 | -0.858458845 | 0.648371 |
| 1879.5  | 1756.5  | 0.676662 | -0.654546079 | 0.730828 |
| 153.5   | 203     | 0.997488 | -0.004707003 | 0.755136 |
| 29      | 51      | 0.955177 | -0.076621282 | 0.409569 |
| 490     | 416     | 0.854994 | -0.303642742 | 0.970126 |
| 151.5   | 84.5    | 0.628829 | -0.976387443 | 0.960321 |
| 290.5   | 227.5   | 0.629178 | -0.513509369 | 0.891839 |
| 214     | 210.5   | 0.884601 | -0.229714333 | 0.897305 |
| 4.5     | 4.5     | 0.935472 | -0.169925001 | 0.935472 |
| 6798    | 7031.5  | 0.841269 | -0.320575804 | 0.814626 |
| 1324    | 1298.5  | 0.753131 | -0.508050049 | 0.768414 |

|         |         |          |              |          |
|---------|---------|----------|--------------|----------|
| 59.5    | 52      | 0.849902 | -0.355658952 | 0.936008 |
| 5631    | 5240.5  | 0.769239 | -0.422658365 | 0.830486 |
| 9       | 9       | 0.958978 | -0.08246216  | 0.958978 |
| 1489    | 1491    | 0.825339 | -0.357113038 | 0.824296 |
| 400     | 387.5   | 0.815894 | -0.344648171 | 0.842366 |
| 693.5   | 670     | 0.596935 | -0.83783923  | 0.624133 |
| 275.322 | 288.653 | 0.46125  | -1.50573269  | 0.431841 |
| 1185    | 1186    | 0.956166 | -0.094327383 | 0.955583 |
| 2046    | 1983    | 0.926841 | -0.128611097 | 0.953193 |
| 632.5   | 869.5   | 0.996445 | -0.009152735 | 0.78976  |
| 7815.5  | 7228    | 0.858311 | -0.214124805 | 0.935103 |
| 825.5   | 999     | 0.951974 | -0.107923823 | 0.814445 |
| 11112   | 11718   | 0.813411 | -0.42633373  | 0.775161 |
| 175     | 171.5   | 0.830342 | -0.406816992 | 0.843861 |
| 3305    | 3134    | 0.846537 | -0.325479178 | 0.885353 |
| 3200    | 3173.5  | 0.871558 | -0.275349728 | 0.877603 |
| 5076.99 | 5455.56 | 0.990243 | 0.022304028  | 0.963079 |
| 4173    | 4568    | 0.905641 | -0.2273852   | 0.845362 |
| 4290.5  | 4232.5  | 0.824926 | -0.376713788 | 0.834986 |
| 3085.5  | 3061.01 | 0.994629 | 0.011883375  | 0.989474 |
| 186     | 203     | 0.931187 | -0.159780444 | 0.871821 |
| 5486    | 6029    | 0.910612 | -0.220487093 | 0.849117 |
| 15966.7 | 15037.7 | 0.919211 | -0.158708042 | 0.964257 |
| 2776.63 | 2945.66 | 0.961092 | -0.094279638 | 0.923784 |
| 580     | 804.501 | 0.768041 | -0.837834422 | 0.587047 |
| 883.997 | 937.989 | 0.915825 | -0.184271318 | 0.873419 |
| 2       | 9.5     | 0.68993  | 1.169925001  | 0.443971 |
| 907.5   | 1132    | 0.926447 | -0.168435383 | 0.766244 |
| 5013.85 | 4769.71 | 0.742899 | -0.46796172  | 0.786207 |
| 828.5   | 676.5   | 0.577299 | -0.906455328 | 0.730502 |
| 2122.5  | 2878    | 0.622508 | -0.670546729 | 0.362842 |
| 1224.01 | 1191.99 | 0.773773 | -0.390102354 | 0.797852 |
| 7775    | 7681    | 0.818468 | -0.389108562 | 0.827518 |
| 5230.99 | 4901.03 | 0.798127 | -0.480385789 | 0.842032 |
| 224.5   | 215     | 0.816884 | -0.405430172 | 0.847847 |
| 3514.5  | 3306.77 | 0.705654 | -0.525421684 | 0.759609 |
| 1673.91 | 1541.16 | 0.650887 | -0.846159705 | 0.708419 |
| 2378    | 2558.5  | 0.946775 | -0.130060541 | 0.900206 |
| 1959.5  | 2016    | 0.800907 | -0.400022642 | 0.778116 |
| 907.005 | 778.636 | 0.625792 | -0.968292178 | 0.726087 |
| 120.5   | 132.5   | 0.923035 | -0.184968882 | 0.860135 |
| 1481.5  | 1821    | 0.97718  | 0.060081245  | 0.900237 |
| 525     | 573     | 0.984956 | -0.038994132 | 0.93349  |
| 1496    | 1812.5  | 0.771647 | -0.640755464 | 0.648397 |
| 3420    | 3562.5  | 0.965499 | -0.086935637 | 0.940972 |
| 1666.5  | 1807.5  | 0.867259 | -0.343954401 | 0.815591 |
| 689.504 | 834.001 | 0.824996 | -0.483971275 | 0.703775 |
| 3253.99 | 3452.01 | 0.892617 | -0.255461302 | 0.852969 |
| 1049.26 | 1154.56 | 0.883887 | -0.294121036 | 0.822071 |
| 2707    | 3089    | 0.82702  | -0.452287822 | 0.740533 |
| 413.5   | 476     | 0.940917 | -0.127594029 | 0.836989 |
| 1491.5  | 1388    | 0.610023 | -1.291065852 | 0.65084  |
| 2442.5  | 2475    | 0.746456 | -0.477298614 | 0.735161 |
| 2015    | 2370    | 0.914787 | -0.226275856 | 0.813532 |
| 509.674 | 614.983 | 0.915548 | -0.195983411 | 0.781927 |
| 1437    | 1479.53 | 0.973564 | -0.059992192 | 0.95438  |

|         |         |          |              |          |
|---------|---------|----------|--------------|----------|
| 732.5   | 730     | 0.858967 | -0.345508152 | 0.861191 |
| 1545.48 | 1634.03 | 0.986856 | -0.030175841 | 0.950513 |
| 2059.5  | 2194.5  | 0.794472 | -0.494844297 | 0.750259 |
| 483.5   | 537.5   | 0.967901 | 0.079807401  | 0.969068 |
| 1228.5  | 1316.5  | 0.928129 | -0.152198833 | 0.877215 |
| 322.5   | 271.5   | 0.987863 | 0.024396654  | 0.876106 |
| 5257.5  | 5417.5  | 0.740603 | -0.680241351 | 0.720914 |
| 1104.5  | 1144.5  | 0.709264 | -0.723315303 | 0.684684 |
| 745     | 675.5   | 0.383994 | -1.183544611 | 0.458937 |
| 2300.5  | 2151.5  | 0.794015 | -0.426686164 | 0.844917 |
| 2181.5  | 2008    | 0.83934  | -0.364886599 | 0.895868 |
| 1067    | 1049    | 0.744709 | -0.655267325 | 0.755911 |
| 414     | 435.5   | 0.962594 | -0.089860613 | 0.930523 |
| 1566    | 1521.5  | 0.498292 | -1.854645283 | 0.513979 |
| 1065    | 1273.5  | 0.931743 | -0.172467196 | 0.815433 |
| 70      | 61.5    | 0.359865 | -2.222392421 | 0.429158 |
| 1350    | 1225    | 0.560313 | -1.307308306 | 0.619666 |
| 3864.5  | 4378    | 0.886342 | -0.314991712 | 0.811161 |
| 941.5   | 971.5   | 0.887262 | -0.220605802 | 0.862288 |
| 328     | 351     | 0.878842 | -0.307703455 | 0.835467 |
| 480.001 | 397.88  | 0.587651 | -1.03579539  | 0.713819 |
| 2414.5  | 2355    | 0.660848 | -0.795083555 | 0.678829 |
| 1029.5  | 962     | 0.548589 | -1.591986346 | 0.586193 |
| 1522    | 1326.5  | 0.620803 | -1.020044382 | 0.709061 |
| 3807.5  | 3129    | 0.934976 | 0.12583082   | 0.810373 |
| 1387.5  | 1397    | 0.99403  | -0.015156146 | 0.990119 |
| 3345.5  | 3234.5  | 0.794031 | -0.480390185 | 0.817453 |
| 11286.6 | 13651.8 | 0.704349 | -0.608325735 | 0.549759 |
| 2436.5  | 2425    | 0.677106 | -0.497377758 | 0.681889 |
| 615.5   | 607     | 0.831583 | -0.409189518 | 0.840798 |
| 229.5   | 217     | 0.806231 | -0.374744793 | 0.851396 |
| 3021.5  | 2951.5  | 0.931665 | -0.152454114 | 0.947411 |
| 5       | 6       | 0.749519 | 0.485426827  | 0.87225  |
| 230     | 238.5   | 0.868015 | -0.227104549 | 0.835202 |
| 355.5   | 372.499 | 0.810594 | -0.485021063 | 0.780053 |
| 1475.5  | 1399    | 0.939261 | -0.151405693 | 0.970836 |
| 2325    | 2548    | 0.890288 | -0.265269987 | 0.828878 |
| 215.5   | 195     | 0.811997 | -0.329479293 | 0.898526 |
| 1042.5  | 1153    | 0.925085 | -0.187415593 | 0.860706 |
| 23      | 21.5    | 0.813205 | -0.436099115 | 0.859013 |
| 1454.5  | 1335.5  | 0.854311 | -0.35719559  | 0.90817  |
| 2037.5  | 1903.01 | 0.804355 | -0.456337128 | 0.850967 |
| 1254.5  | 1338    | 0.837595 | -0.401872565 | 0.794522 |
| 188.5   | 162.5   | 0.516291 | -1.803533211 | 0.595599 |
| 2648.5  | 1837.5  | 0.521411 | -0.798259567 | 0.852616 |
| 987.499 | 1166    | 0.819713 | -0.425053946 | 0.699671 |
| 4998    | 7083    | 0.992354 | -0.021373651 | 0.779987 |
| 641.5   | 523     | 0.717851 | -0.553815986 | 0.877992 |
| 661.001 | 1070    | 0.997132 | -0.007665948 | 0.677121 |
| 274     | 242     | 0.846858 | -0.233845938 | 0.96607  |
| 22.5    | 38      | 0.732472 | 0.697971463  | 0.97046  |
| 809.5   | 713     | 0.779234 | -0.358248347 | 0.897273 |
| 998     | 835.5   | 0.71382  | -0.559883982 | 0.854925 |
| 633.5   | 697     | 0.945105 | -0.126048552 | 0.879904 |
| 398.5   | 481.5   | 0.911685 | -0.241831133 | 0.79545  |
| 278.5   | 406.5   | 0.49749  | -1.449108175 | 0.276166 |

|         |         |          |              |          |
|---------|---------|----------|--------------|----------|
| 2200.5  | 2260    | 0.921487 | -0.164036442 | 0.901875 |
| 611.5   | 455     | 0.63321  | -0.519806757 | 0.940138 |
| 538     | 533.5   | 0.798459 | -0.462283624 | 0.80441  |
| 443.5   | 402.5   | 0.864285 | -0.30495026  | 0.929742 |
| 261     | 274     | 0.923773 | -0.198183261 | 0.894426 |
| 1694.5  | 1821.51 | 0.878323 | -0.281132394 | 0.827884 |
| 978     | 1052    | 0.971902 | -0.0733796   | 0.929154 |
| 958     | 1296.5  | 0.984438 | -0.045123746 | 0.808801 |
| 10653.6 | 11634   | 0.816339 | -0.470475011 | 0.758185 |
| 2160    | 2622.5  | 0.852424 | -0.37075133  | 0.719926 |
| 998.506 | 1128.51 | 0.9173   | -0.213751157 | 0.840358 |
| 109.5   | 134.5   | 0.879984 | -0.30718151  | 0.742858 |
| 1945.5  | 2287.5  | 0.886157 | -0.264147167 | 0.770447 |
| 994     | 1134.5  | 0.954297 | -0.106133891 | 0.864141 |
| 441.5   | 516     | 0.948281 | -0.110312595 | 0.831543 |
| 1138    | 1212.5  | 0.754805 | -0.537574998 | 0.70659  |
| 33728.5 | 30477.5 | 0.568953 | -1.095962382 | 0.63759  |
| 6949    | 7208    | 0.790455 | -0.568140586 | 0.767483 |
| 3068.51 | 3472.34 | 0.782841 | -0.514060788 | 0.693847 |
| 4277.38 | 4866.2  | 0.95112  | -0.11724708  | 0.865786 |
| 2256.97 | 2988.54 | 0.95305  | -0.125446624 | 0.774951 |
| 1947.5  | 2099.03 | 0.773714 | -0.475186968 | 0.714772 |
| 305     | 393.5   | 0.949752 | 0.124545098  | 0.888993 |
| 4542    | 4558    | 0.825299 | -0.390888776 | 0.822773 |
| 0       | 0.5     | 1        | #DIV/0!      | 0.308068 |
| 1503.5  | 1553    | 0.730442 | -0.50698524  | 0.702589 |
| 3467.52 | 3341.51 | 0.656702 | -0.883562964 | 0.681548 |
| 2842.5  | 2768.5  | 0.81246  | -0.427526237 | 0.831023 |
| 5902    | 6483.5  | 0.768811 | -0.552035932 | 0.701865 |
| 4068.5  | 4358.5  | 0.791611 | -0.480753668 | 0.741813 |
| 6867.75 | 7406.01 | 0.536668 | -1.447015038 | 0.491357 |
| 3396    | 3327    | 0.782514 | -0.415037499 | 0.799577 |
| 195.5   | 162.5   | 0.706312 | 0.558900204  | 0.61308  |
| 9107.53 | 7290.57 | 0.470639 | -1.009177121 | 0.653375 |
| 1104.49 | 980.488 | 0.872282 | -0.260541701 | 0.958817 |
| 376.5   | 297     | 0.699694 | -0.490416864 | 0.916799 |
| 2290.5  | 2538.5  | 0.899938 | -0.199635439 | 0.817882 |
| 955.766 | 1342.94 | 0.749485 | -0.617853756 | 0.504103 |
| 383     | 259.5   | 0.556379 | -0.475292073 | 0.927939 |
| 189.5   | 291     | 0.78575  | 0.563228979  | 0.97346  |
| 70.5    | 98      | 0.775525 | 0.539928747  | 0.96777  |
| 1.26535 | 6       | 0.860431 | -1.069407077 | 0.216772 |
| 5185.88 | 4571.26 | 0.465406 | -1.538260689 | 0.543421 |
| 6947    | 6387    | 0.573019 | -0.827746341 | 0.642571 |
| 59      | 88      | 0.634382 | -0.69281849  | 0.313807 |
| 1513.5  | 1483.5  | 0.683993 | -0.663560897 | 0.699674 |
| 992.5   | 955     | 0.775329 | -0.463070196 | 0.805202 |
| 373.5   | 449     | 0.804914 | -0.561970858 | 0.690616 |
| 57.5    | 48.5    | 0.471491 | -1.523561956 | 0.576597 |
| 196.5   | 140.5   | 0.559179 | -1.158953884 | 0.77205  |
| 273.5   | 293.5   | 0.691641 | -0.652453527 | 0.635993 |
| 396.999 | 505.497 | 0.993149 | 0.016264614  | 0.843307 |
| 306.5   | 225     | 0.90702  | 0.187339963  | 0.735717 |
| 1181    | 1348    | 0.806994 | -0.470237225 | 0.714441 |
| 226.501 | 278.499 | 0.635216 | -1.17951742  | 0.511694 |
| 990.5   | 821.5   | 0.595474 | -0.688743965 | 0.765881 |

|         |         |          |              |          |
|---------|---------|----------|--------------|----------|
| 1862    | 1590.5  | 0.889635 | -0.22964216  | 0.998988 |
| 927.497 | 923.504 | 0.74446  | -0.518462423 | 0.747911 |
| 5254.5  | 5365    | 0.783136 | -0.320075979 | 0.761247 |
| 2309.5  | 2096.5  | 0.740913 | -0.436117488 | 0.829733 |
| 2265.5  | 2064.5  | 0.657714 | -0.563471794 | 0.7457   |
| 397.999 | 375     | 0.871888 | -0.214560436 | 0.925124 |
| 144.5   | 161.5   | 0.849212 | -0.393565969 | 0.777463 |
| 552.5   | 831.5   | 0.60473  | -0.91753784  | 0.317951 |
| 127     | 96.5    | 0.846404 | -0.274439169 | 0.940159 |
| 38      | 36.5    | 0.707938 | -0.724365557 | 0.735357 |
| 83.5    | 74      | 0.838249 | -0.350281291 | 0.92297  |
| 1931.5  | 2015    | 0.896824 | -0.247507427 | 0.868889 |
| 1532    | 1502.5  | 0.774642 | -0.433995657 | 0.790717 |
| 2675    | 2561    | 0.725428 | -0.622525914 | 0.757075 |
| 926.5   | 847.996 | 0.936086 | 0.122348203  | 0.875491 |
| 696.5   | 704.5   | 0.854813 | -0.32503847  | 0.846702 |
| 324.5   | 283     | 0.747732 | -0.506024313 | 0.854161 |
| 2997.48 | 2931.06 | 0.787818 | -0.422836392 | 0.805722 |
| 1746.5  | 1603.5  | 0.768387 | -0.442698283 | 0.838266 |
| 1527.02 | 1422.49 | 0.704066 | -0.55901276  | 0.763837 |
| 2137    | 1963    | 0.732891 | -0.547643597 | 0.799062 |
| 604     | 561.5   | 0.866208 | -0.251140727 | 0.92475  |
| 69      | 87.5    | 0.361663 | -1.380604002 | 0.220976 |
| 1957.03 | 1860.52 | 0.800321 | -0.458230506 | 0.835613 |
| 2220    | 3191.5  | 0.694268 | -0.90202484  | 0.462295 |
| 444     | 409.5   | 0.634468 | -0.811422292 | 0.694851 |
| 825.5   | 867     | 0.728201 | -0.572780444 | 0.689634 |
| 994.5   | 1106    | 0.786746 | -0.497371665 | 0.709729 |
| 1071.5  | 1042.5  | 0.925715 | -0.137638173 | 0.94775  |
| 8       | 9.5     | 0.424386 | -2.415037499 | 0.338798 |
| 55      | 36      | 0.326763 | -1.5334322   | 0.619326 |
| 173.5   | 165.5   | 0.753987 | 0.486020651  | 0.72733  |
| 1.5     | 0       | 0.515664 | 1            | 0.237986 |
| 513.652 | 803.131 | 0.552832 | -1.691483244 | 0.312806 |
| 1184.5  | 1570.5  | 0.696259 | -0.943275943 | 0.522568 |
| 11.5    | 8.5     | 0.512326 | -1.716207034 | 0.674729 |
| 178     | 242.5   | 0.751903 | -0.707549106 | 0.550684 |
| 1869.5  | 2018    | 0.646819 | -0.83708016  | 0.59141  |
| 37      | 59.0001 | 0.992371 | 0.019365325  | 0.685676 |
| 2278    | 1987.5  | 0.64565  | -0.698224811 | 0.756265 |
| 769.5   | 701.5   | 0.872098 | -0.261348029 | 0.939996 |
| 1.5     | 2.5     | 0.523243 | #NUM!        | 0.31594  |
| 1280.5  | 1371.5  | 0.850568 | -0.377047701 | 0.805668 |
| 0.5     | 0       | 1        | 0            | 0.450185 |
| 1072.5  | 1422.5  | 0.979556 | 0.05217914   | 0.840952 |
| 2406.99 | 2644.98 | 0.839082 | -0.404457422 | 0.776318 |
| 5276    | 5251.5  | 0.648976 | -0.648409388 | 0.653023 |
| 1459.5  | 1591.5  | 0.916814 | -0.187077949 | 0.855789 |
| 5483.5  | 6334    | 0.940503 | -0.13273619  | 0.83709  |
| 576     | 576.5   | 0.919029 | -0.185506543 | 0.91845  |
| 2176    | 2136    | 0.738647 | -0.489410341 | 0.754485 |
| 3       | 3.5     | 1        | 0            | 0.888898 |
| 12699.5 | 14196   | 0.75559  | -0.572379257 | 0.674438 |
| 310.512 | 349.932 | 0.882724 | -0.270508064 | 0.797964 |
| 798.5   | 780     | 0.98923  | 0.023298687  | 0.973909 |
| 955     | 1160    | 0.892915 | -0.276389978 | 0.765447 |



|         |         |          |              |          |
|---------|---------|----------|--------------|----------|
| 1013.5  | 1014    | 0.801269 | -0.378725161 | 0.800858 |
| 26.4416 | 34      | 0.765291 | -0.33242015  | 0.491899 |
| 714.651 | 584.976 | 0.453509 | -0.702196587 | 0.680324 |
| 5.55797 | 10.655  | 0.651582 | 1.01407264   | 0.963073 |
| 6877.46 | 5198.32 | 0.78375  | -0.273728658 | 0.909282 |
| 19.5    | 17.5    | 0.852442 | -0.197939378 | 0.970231 |
| 161.5   | 141     | 0.846716 | -0.247927513 | 0.969661 |
| 9.5     | 16      | 0.661918 | 0.610053482  | 0.893897 |
| 183.486 | 120.574 | 0.570624 | -0.619818822 | 0.991482 |
| 20.6976 | 29.7389 | 0.920339 | 0.210122364  | 0.858522 |
| 0       | 0       | ?        | #DIV/0!      | ?        |
| 0       | 0       | 0.308068 | #DIV/0!      | 0.308068 |
| 294.5   | 228.5   | 0.947624 | -0.062572471 | 0.7801   |
| 5560.34 | 5587.34 | 0.745761 | -0.583738361 | 0.742255 |
| 467     | 608.5   | 0.918221 | -0.210861027 | 0.742611 |
| 284     | 179.5   | 0.467231 | -1.572318291 | 0.735935 |
| 4829.05 | 4753.27 | 0.786246 | -0.441358313 | 0.798533 |
| 16      | 27.5    | 0.984611 | 0.044394119  | 0.676418 |
| 8       | 5       | 0.175029 | -2.415037499 | 0.411079 |
| 577     | 573.5   | 0.829958 | -0.328506457 | 0.834908 |
| 419     | 479.5   | 0.982048 | -0.047248329 | 0.901972 |
| 2090.5  | 2123.5  | 0.820596 | -0.316675506 | 0.806654 |
| 154     | 215.5   | 0.958753 | -0.117039421 | 0.753602 |
| 0       | 0       | ?        | #DIV/0!      | ?        |
| 1       | 3       | 1        | 0            | 0.513713 |
| 182.5   | 182     | 0.843557 | -0.372201301 | 0.845404 |
| 553     | 582.5   | 0.835663 | -0.367984276 | 0.797915 |
| 525.95  | 596.596 | 0.783267 | -0.339736943 | 0.655696 |
| 34.4365 | 8.03993 | 0.420272 | -0.490285528 | 0.219628 |
| 1       | 0.5     | 0.651448 | -1           | 1        |
| 3982.52 | 5657    | 0.938022 | -0.187353425 | 0.731939 |
| 291.5   | 674     | 0.863389 | -0.609923245 | 0.434417 |
| 104     | 141     | 0.94247  | -0.169058258 | 0.762751 |
| 2814    | 3077.5  | 0.537546 | -1.755368224 | 0.489013 |
| 10147.5 | 10039.5 | 0.964133 | 0.083950254  | 0.957771 |
| 24830   | 27808   | 0.837337 | -0.387353454 | 0.757848 |
| 2799.51 | 2440.01 | 0.857359 | -0.268247701 | 0.965038 |
| 59.5    | 45      | 0.945572 | -0.11345805  | 0.879625 |
| 52.5    | 103     | 0.824861 | -0.504792152 | 0.379764 |
| 22109.6 | 23478.5 | 0.793896 | -0.515209054 | 0.753367 |
| 66      | 35.5    | 0.487712 | -1.343726917 | 0.863356 |
| 570     | 322     | 0.87813  | -0.261516578 | 0.804001 |
| 5748.02 | 5923.42 | 0.839097 | -0.283221041 | 0.812296 |
| 1877.5  | 2389    | 0.805943 | -0.376246584 | 0.598779 |
| 10.5    | 14      | 0.690029 | -0.807354922 | 0.491593 |
| 2102    | 2519.5  | 0.421968 | -0.700482615 | 0.254177 |
| 2954    | 2893    | 0.711481 | -0.370160007 | 0.736215 |
| 3587    | 3815.5  | 0.743552 | -0.474847604 | 0.689565 |
| 1546    | 1632    | 0.72547  | -0.60422064  | 0.684299 |
| 99      | 99.4999 | 0.73965  | -0.734538857 | 0.736543 |
| 2009.99 | 2214.54 | 0.64099  | -0.668050939 | 0.557146 |
| 7664.35 | 7003.35 | 0.801435 | -0.229071359 | 0.916948 |
| 70      | 77      | 0.648217 | -0.703018262 | 0.569901 |
| 143.5   | 203     | 0.698454 | -0.557576613 | 0.400064 |
| 1450    | 1793    | 0.906403 | -0.247399037 | 0.770231 |
| 5832    | 5972    | 0.805444 | -0.532137314 | 0.790832 |

|         |         |          |              |           |
|---------|---------|----------|--------------|-----------|
| 559.5   | 574     | 0.885809 | -0.273125938 | 0.868878  |
| 4130    | 4480.5  | 0.859826 | -0.34171243  | 0.804942  |
| 851.5   | 862     | 0.869194 | -0.320234791 | 0.861216  |
| 187     | 151     | 0.827088 | -0.357069901 | 0.978652  |
| 1028.5  | 994.498 | 0.691773 | -0.546896509 | 0.72188   |
| 4074    | 4123.5  | 0.74943  | -0.520301077 | 0.739929  |
| 1008.5  | 1037    | 0.800463 | -0.424366075 | 0.779185  |
| 2520    | 2587.49 | 0.86962  | -0.255148654 | 0.848458  |
| 6039.5  | 6422    | 0.622426 | -0.491603044 | 0.552488  |
| 1325    | 1328.5  | 0.934189 | -0.132774887 | 0.932219  |
| 6       | 6       | 0.614384 | -1           | 0.614384  |
| 1694    | 1822    | 0.910423 | -0.221399172 | 0.863453  |
| 472.627 | 475.724 | 0.822419 | -0.425880954 | 0.81799   |
| 4.5     | 4.5     | 0.720252 | -0.847996907 | 0.720252  |
| 2391.5  | 2686    | 0.983157 | -0.025869078 | 0.867398  |
| 3571.92 | 3937.56 | 0.825807 | -0.402410489 | 0.755654  |
| 183.5   | 198.001 | 0.984824 | 0.034952599  | 0.966289  |
| 81      | 95      | 0.928513 | 0.175849835  | 0.976126  |
| 2941    | 3310    | 0.872645 | -0.295377844 | 0.788888  |
| 973.5   | 819     | 0.502202 | -0.799042848 | 0.666103  |
| 2073.5  | 2117    | 0.770847 | -0.467586525 | 0.75432   |
| 13.5    | 15.5    | 0.609127 | -0.847996907 | 0.503166  |
| 503     | 544.499 | 0.882024 | -0.334169654 | 0.835848  |
| 429     | 365     | 0.837533 | -0.371968777 | 0.943634  |
| 335     | 497     | 0.791164 | -0.496233582 | 0.49733   |
| 11      | 13.5    | 0.790247 | -0.552541023 | 0.65253   |
| 63.5    | 83.5    | 0.950116 | 0.130256386  | 0.884131  |
| 4311.51 | 3959.05 | 0.621351 | -0.779333789 | 0.688863  |
| 739.5   | 747.498 | 0.668503 | -0.739243449 | 0.660411  |
| 382.5   | 428     | 0.484292 | -2.379643593 | 0.428562  |
| 3677.94 | 2360    | 0.359851 | 1.195946547  | 0.262083  |
| 37836   | 33622.5 | 0.390669 | -0.870198505 | 0.50525   |
| 590     | 535.5   | 0.817033 | -0.251829897 | 0.921661  |
| 48      | 52.5    | 0.580859 | -0.970252657 | 0.515461  |
| 1395.03 | 1287.53 | 0.830148 | -0.390106645 | 0.884641  |
| 785.5   | 805     | 0.993286 | -0.01384112  | 0.975833  |
| 1.5     | 2       | 0.495025 | -1.584962501 | 0.329316  |
| 1691.5  | 1245.5  | 0.946577 | -0.100663172 | 0.845768  |
| 3.5     | 7       | 0.407544 | -1.222392421 | 0.0775154 |
| 1900    | 2071.5  | 0.66665  | -0.691498098 | 0.597441  |
| 2       | 6       | 0.897841 | 0.321928095  | 0.400619  |
| 32      | 46.5    | 0.76713  | 0.584962501  | 0.977667  |
| 1703    | 1708.5  | 0.81207  | -0.371370914 | 0.809476  |
| 851.496 | 825.49  | 0.909945 | -0.208323388 | 0.930307  |
| 1455    | 1327    | 0.678355 | -0.550427281 | 0.76264   |
| 96.9999 | 93.0001 | 0.717406 | -0.858444368 | 0.741886  |
| 3782    | 4066.14 | 0.929644 | -0.135491563 | 0.8713    |
| 840.5   | 445.5   | 0.975442 | -0.040029089 | 0.626429  |
| 1660.5  | 1519.96 | 0.956985 | -0.086847731 | 0.98069   |
| 3926.5  | 4147    | 0.887377 | -0.211107727 | 0.841737  |
| 1484    | 1361    | 0.743875 | -0.367230108 | 0.835633  |
| 1058    | 1158    | 0.777833 | -0.560288891 | 0.716467  |
| 630     | 596     | 0.790797 | -0.422691072 | 0.83411   |
| 2698.96 | 3286.5  | 0.908681 | -0.18235157  | 0.7473    |
| 31.5    | 27      | 0.402642 | -0.977279923 | 0.539794  |
| 5.5     | 8.5     | 0.783893 | 0.447458977  | 0.89035   |

|         |         |          |              |          |
|---------|---------|----------|--------------|----------|
| 172.876 | 158.163 | 0.804097 | 0.28858531   | 0.732668 |
| 927.497 | 818.495 | 0.655143 | -0.666137122 | 0.758257 |
| 2533    | 2228    | 0.689794 | -0.770869984 | 0.775528 |
| 180     | 141.5   | 0.993065 | -0.012072832 | 0.830957 |
| 636.501 | 814.498 | 0.793741 | -0.65581463  | 0.648748 |
| 3605    | 3984    | 0.715883 | -0.524037263 | 0.627821 |
| 1728    | 1811.5  | 0.952979 | -0.105182237 | 0.920796 |
| 2559    | 1163    | 0.846533 | 0.302974113  | 0.53271  |
| 196.5   | 159.5   | 0.905485 | -0.196320736 | 0.954504 |
| 0       | 0       | ?        | #DIV/0!      | ?        |
| 3046    | 2652.5  | 0.606499 | -0.726034545 | 0.725165 |
| 15.5    | 22      | 0.588437 | 1.04580369   | 0.738594 |
| 698     | 658     | 0.757211 | -0.420559784 | 0.810366 |
| 282.5   | 440     | 0.714801 | -1.130879802 | 0.475305 |
| 95.5    | 229.5   | 0.925231 | -0.310642287 | 0.462397 |
| 824.5   | 738.001 | 0.762274 | -0.318869222 | 0.885952 |
| 1693    | 1552    | 0.473366 | -0.618803317 | 0.577695 |
| 25.5    | 33.5    | 0.576308 | -1.148863386 | 0.398482 |
| 22.5    | 226.5   | 0.882407 | 0.900464326  | 0.225315 |
| 0.5     | 1       | 0.622002 | 1            | 1        |
| 1.5     | 0       | 0.702697 | 0.736965594  | 0.370757 |
| 33.5    | 28      | 0.835593 | -0.393663848 | 0.948099 |
| 40      | 15.5    | 0.8286   | -0.255838904 | 0.559972 |
| 1       | 5       | 0.837425 | 1            | 0.550362 |
| 1001.43 | 983.062 | 0.663348 | -0.616244035 | 0.679554 |
| 0       | 0       | ?        | #DIV/0!      | ?        |
| 1803    | 2214    | 0.885615 | 0.302433008  | 0.997402 |
| 2888.46 | 3187.59 | 0.670842 | -0.550977535 | 0.577759 |
| 3113.5  | 3129    | 0.779833 | -0.456162791 | 0.775956 |
| 332     | 334.5   | 0.856083 | -0.28228229  | 0.850096 |
| 2825.5  | 2685.5  | 0.699502 | -0.557399878 | 0.743199 |
| 1567.5  | 1949.5  | 0.786298 | -0.5307704   | 0.63224  |
| 1844.57 | 1977.63 | 0.978714 | -0.038866746 | 0.921136 |
| 4927.14 | 5503.27 | 0.550092 | -0.812770268 | 0.456086 |
| 2056.99 | 1809.99 | 0.772056 | -0.39761145  | 0.883802 |
| 1856    | 1588.5  | 0.887558 | -0.23501405  | 0.995341 |
| 2236.02 | 2327.02 | 0.873054 | -0.280858859 | 0.84438  |
| 1547.5  | 1763.5  | 0.792608 | -0.521582231 | 0.703128 |
| 49      | 18.5    | 0.991997 | -0.014797002 | 0.560192 |
| 183.5   | 168.5   | 0.732701 | -0.712281331 | 0.78639  |
| 297     | 272.5   | 0.550807 | -0.956931278 | 0.616973 |
| 485.5   | 549.5   | 0.889335 | -0.283082549 | 0.809397 |
| 207     | 148     | 0.59381  | -0.823122238 | 0.850764 |
| 2068.01 | 1850.99 | 0.804825 | -0.352694694 | 0.89808  |
| 307.5   | 278.5   | 0.877096 | -0.228268988 | 0.956062 |
| 3890.49 | 3989    | 0.641869 | -0.925017805 | 0.624915 |
| 554     | 584.5   | 0.911093 | -0.234158916 | 0.878766 |
| 218.5   | 258     | 0.92561  | -0.186526969 | 0.816887 |
| 103     | 108.5   | 0.910054 | 0.202242722  | 0.941857 |
| 352     | 373     | 0.502963 | -1.30461351  | 0.464869 |
| 0.5     | 0       | 0.308068 | #NUM!        | 1        |
| 567.5   | 728     | 0.768154 | -0.537451785 | 0.581473 |
| 273     | 255.5   | 0.776109 | -0.549725321 | 0.820043 |
| 1.5     | 1       | 0.198892 | #NUM!        | 0.353387 |
| 422     | 499     | 0.802596 | -0.394669702 | 0.663382 |
| 296     | 206     | 0.955956 | -0.059706246 | 0.722739 |

|         |         |          |              |           |
|---------|---------|----------|--------------|-----------|
| 7.5     | 14      | 0.824744 | 0.485426827  | 0.796465  |
| 6.5     | 6       | 0.28719  | -2.115477217 | 0.329316  |
| 3591.5  | 3553.5  | 0.732723 | -0.483660442 | 0.742093  |
| 5513.09 | 5767.49 | 0.946133 | 0.121591505  | 0.974376  |
| 1452.99 | 1030.01 | 0.131526 | -0.965642491 | 0.466978  |
| 1545.03 | 1871.97 | 0.941941 | -0.13400801  | 0.806239  |
| 1654.99 | 1847.01 | 0.891595 | -0.281074612 | 0.822038  |
| 655.5   | 510.5   | 0.797411 | -0.295756039 | 0.960162  |
| 569.499 | 591.502 | 0.871461 | -0.315915258 | 0.846659  |
| 298.5   | 377.5   | 0.708267 | -0.470043062 | 0.480513  |
| 1426    | 1279    | 0.805923 | -0.396274828 | 0.888041  |
| 2233.5  | 2195.5  | 0.74491  | -0.544831972 | 0.75802   |
| 476.5   | 504     | 0.852882 | -0.38457975  | 0.817499  |
| 3428.5  | 3685.01 | 0.744351 | -0.505524464 | 0.684495  |
| 5952.72 | 6864.9  | 0.784006 | -0.535291973 | 0.68467   |
| 3040.5  | 1886    | 0.329174 | -1.195053443 | 0.730107  |
| 697.5   | 721     | 0.509101 | -1.151428658 | 0.485635  |
| 762     | 508     | 0.771122 | -0.336437227 | 0.860155  |
| 7974.04 | 9119.5  | 0.52896  | -0.826027181 | 0.414873  |
| 826.495 | 781.002 | 0.923642 | 0.1530572    | 0.886424  |
| 0.5     | 0       | 0.219102 | 2.321928095  | 0.14822   |
| 13.5    | 10      | 0.675463 | -0.584962501 | 0.92469   |
| 771     | 875     | 0.902044 | -0.26753229  | 0.82551   |
| 1456.51 | 1470    | 0.797737 | 0.422430055  | 0.803067  |
| 18.5    | 19.5    | 0.86956  | -0.255257055 | 0.827021  |
| 468     | 564     | 0.979016 | 0.052962766  | 0.906195  |
| 59.5    | 68      | 0.835399 | -0.340228912 | 0.728953  |
| 658.5   | 645.5   | 0.786156 | -0.465194174 | 0.800952  |
| 151     | 207.5   | 0.952174 | 0.105891169  | 0.815329  |
| 0       | 0       | 0.308068 | #DIV/0!      | 0.308068  |
| 97      | 108     | 0.953096 | 0.086587685  | 0.960903  |
| 466.5   | 736     | 0.463624 | -0.617805757 | 0.112275  |
| 1.5     | 1.5     | 0.810902 | -0.584962501 | 0.810902  |
| 5197.46 | 8743.68 | 0.656782 | -0.937949609 | 0.318605  |
| 4631.78 | 4636.61 | 0.731702 | -0.496679424 | 0.730799  |
| 63.5    | 71.4807 | 0.910332 | -0.22123116  | 0.832473  |
| 0       | 0       | ?        | #DIV/0!      | ?         |
| 0.5     | 0.5     | 0.450185 | #NUM!        | 0.450185  |
| 0       | 2       | 0.785812 | #DIV/0!      | 0.438509  |
| 23.5    | 19.5    | 0.744968 | -0.600392541 | 0.869832  |
| 19      | 18.5    | 1        | 0            | 0.984889  |
| 2.39766 | 9.99909 | 0.464998 | 2.363503096  | 0.856763  |
| 3       | 0       | 0.308068 | -1           | 0.308068  |
| 2.5     | 6.5     | 0.550362 | -1.321928095 | 0.0908938 |
| 25.5    | 37.5    | 0.935027 | -0.164865357 | 0.667622  |
| 883.567 | 983.309 | 0.629672 | -0.655536797 | 0.534008  |
| 10      | 15      | 0.925911 | -0.152003093 | 0.587239  |
| 32.5    | 31.5    | 0.482264 | 0.678071905  | 0.462148  |
| 178.5   | 275.998 | 0.996084 | 0.012072832  | 0.755619  |
| 4       | 1       | 0.892135 | -0.192645078 | 0.514418  |
| 0       | 0       | ?        | #DIV/0!      | ?         |
| 41.0095 | 47.0047 | 0.821787 | 0.448868284  | 0.892264  |
| 2       | 9       | 0.951005 | 0.321928095  | 0.449581  |
| 211.5   | 254.5   | 0.823069 | -0.416174823 | 0.688606  |
| 29.5    | 24.5    | 0.920517 | -0.154722595 | 0.946935  |
| 5.4636  | 8.07203 | 0.762867 | 0.122979609  | 0.244959  |

|         |         |          |              |            |
|---------|---------|----------|--------------|------------|
| 56      | 159     | 0.845512 | -0.784987109 | 0.336148   |
| 10      | 3       | 0.348672 | 0.963474124  | 0.149959   |
| 311.5   | 350.5   | 0.482314 | -0.690631316 | 0.365769   |
| 555.732 | 525.485 | 0.720163 | -0.572103449 | 0.764345   |
| 2       | 6       | 0.308068 | -0.415037499 | 0.00159914 |
| 149.5   | 128.5   | 0.226292 | -0.692620214 | 0.408401   |
| 6       | 5.5     | 0.872571 | -0.263034406 | 0.935963   |
| 1112.5  | 911     | 0.831365 | -0.301007443 | 0.993484   |
| 829.5   | 664.5   | 0.49764  | -0.736096239 | 0.72492    |
| 342.5   | 314     | 0.743927 | -0.638600464 | 0.801273   |
| 31.5    | 44      | 0.643103 | -0.807354922 | 0.395689   |
| 1037    | 964     | 0.667825 | -0.507436011 | 0.741674   |
| 0.5     | 3.5     | 0.825659 | #NUM!        | 0.191287   |
| 16.5    | 35      | 0.93087  | 0.2410081    | 0.659726   |
| 0       | 0       | ?        | #DIV/0!      | ?          |
| 18.5    | 31.5    | 0.839577 | -0.624490865 | 0.555423   |
| 0.5     | 0       | 0.308068 | #NUM!        | 1          |
| 8.5     | 7.5     | 0.809378 | 0.436099115  | 0.748758   |
| 72.5    | 116.5   | 0.692782 | -0.9510904   | 0.398319   |
| 954.5   | 2194    | 0.687027 | -1.726173879 | 0.293416   |
| 64      | 266.5   | 0.939168 | -0.231815675 | 0.161505   |
| 267.5   | 245     | 0.661538 | -0.645542566 | 0.735203   |
| 44      | 50.5    | 0.800004 | -0.601450624 | 0.718221   |
| 5968.5  | 6879    | 0.898554 | -0.235524937 | 0.798406   |
| 306     | 239.5   | 0.736378 | -0.526068812 | 0.921787   |
| 0       | 1.5     | 0.450185 | #DIV/0!      | 1          |
| 12.5    | 12.5    | 0.763231 | -0.736965594 | 0.763231   |
| 481.5   | 497.999 | 0.945418 | -0.128393779 | 0.923543   |
| 44      | 30      | 0.488812 | 0.84434913   | 0.3511     |
| 11.5    | 9.5     | 0.864816 | 0.231325546  | 0.735561   |
| 3.5     | 4       | 0.919687 | -0.222392421 | 0.84064    |
| 107.5   | 160.5   | 0.959558 | 0.109788146  | 0.791948   |
| 2600.06 | 2680.21 | 0.8538   | -0.333822074 | 0.832453   |
| 7.5     | 8.5     | 0.809553 | 0.415037499  | 0.884622   |
| 39      | 44      | 0.980812 | -0.037474705 | 0.885481   |
| 1       | 1.5     | 0.353387 | #NUM!        | 0.198892   |
| 13      | 14      | 0.951922 | 0.106915204  | 1          |
| 324     | 281.5   | 0.542511 | -0.513301516 | 0.725988   |
| 91.5    | 84.5    | 0.900144 | -0.21191909  | 0.955917   |
| 15.5    | 20.5    | 0.980001 | -0.047305715 | 0.784243   |
| 71.5    | 65.5    | 0.943319 | 0.116253068  | 0.887085   |
| 19.7991 | 21.271  | 0.802648 | 0.53823248   | 0.834285   |
| 33.4106 | 41.8853 | 0.560466 | -0.705315499 | 0.358862   |
| 638     | 400.5   | 0.812481 | -0.314597598 | 0.830766   |
| 8.28217 | 1.24138 | 0.601453 | -0.584321613 | 0.432847   |
| 5.5     | 2       | 0.462019 | -0.874469118 | 0.758682   |
| 12.5    | 14.5    | 0.627586 | -1.058893689 | 0.532012   |
| 0       | 0.5     | 0.450185 | #DIV/0!      | 1          |
| 59.5    | 69.5    | 0.853505 | 0.371968777  | 0.936758   |
| 200.919 | 181.074 | 0.156029 | -1.18385612  | 0.218497   |
| 65.3249 | 127.305 | 0.239665 | -1.333890154 | 0.0328063  |
| 870.761 | 698.974 | 0.577005 | -0.807197533 | 0.758606   |
| 264.818 | 234.124 | 0.300195 | -1.167804614 | 0.395891   |
| 0.5     | 0.5     | 0.513713 | 1.584962501  | 0.513713   |
| 13.5    | 32      | 0.875905 | 0.374395515  | 0.581559   |
| 9       | 19      | 0.975235 | -0.08246216  | 0.530189   |

|         |         |           |              |            |
|---------|---------|-----------|--------------|------------|
| 1061    | 732     | 0.911266  | 0.133046554  | 0.645321   |
| 67      | 111     | 0.75696   | -0.856635825 | 0.464424   |
| 1093    | 2315.5  | 0.704862  | -1.541408588 | 0.341776   |
| 9.5     | 13      | 0.675235  | 0.706268797  | 0.85951    |
| 2589.15 | 2392.12 | 0.753002  | -0.390384858 | 0.829959   |
| 10      | 13.5    | 0.74075   | -0.736965594 | 0.545049   |
| 0.5     | 2       | 0.622002  | 1            | 0.353387   |
| 1.5     | 3.5     | 1         | 0            | 0.568955   |
| 1       | 2.5     | 0.680109  | #NUM!        | 0.338084   |
| 327     | 348.5   | 0.714819  | -0.510796482 | 0.657565   |
| 5.1509  | 2.80957 | 0.531724  | -0.55746961  | 0.787399   |
| 1525.5  | 1746    | 0.844315  | -0.350461783 | 0.744515   |
| 0       | 0       | ?         | #DIV/0!      | ?          |
| 0.5     | 2       | 1         | 0            | 0.0805096  |
| 468.334 | 473.213 | 0.907631  | -0.203108163 | 0.900362   |
| 0.5     | 0       | 0.308068  | #NUM!        | 1          |
| 304.5   | 351     | 0.924803  | -0.192306695 | 0.834302   |
| 162.5   | 146     | 0.924305  | -0.120294234 | 0.979576   |
| 2.5     | 5       | 0.866773  | -0.321928095 | 0.353387   |
| 0       | 0       | ?         | #DIV/0!      | ?          |
| 11.5    | 4.5     | 0.932408  | 0.120294234  | 0.514539   |
| 0       | 0.5     | 1         | #DIV/0!      | 0.308068   |
| 3448.5  | 3263.5  | 0.582961  | -0.663296248 | 0.636433   |
| 1.5     | 1       | 0.264994  | 2            | 0.226047   |
| 6       | 7       | 0.770719  | -0.584962501 | 0.665102   |
| 0       | 0.5     | 1         | #DIV/0!      | 0.308068   |
| 757.5   | 565.5   | 0.40754   | -0.79857317  | 0.723981   |
| 1712    | 1675    | 0.774417  | -0.394953253 | 0.794026   |
| 1310    | 1639.99 | 0.987159  | 0.029432654  | 0.857073   |
| 676.5   | 310.5   | 0.134323  | -1.427531534 | 0.795648   |
| 0.5     | 1       | 0.368277  | 3.169925001  | 0.423425   |
| 307.5   | 269.5   | 0.785627  | -0.378746227 | 0.898846   |
| 0       | 0.5     | 0.0805096 | #DIV/0!      | 0.18169    |
| 5.5     | 10      | 0.0312746 | -1.459431619 | 0.00312923 |
| 7.5     | 4.5     | 0.9402    | -0.099535674 | 0.711078   |
| 634     | 227     | 0.889448  | 0.195486708  | 0.472382   |
| 2872    | 2382    | 0.941011  | -0.086693852 | 0.886862   |
| 429.44  | 754.639 | 0.787756  | -0.712273172 | 0.45015    |
| 1794.5  | 1863.5  | 0.771341  | -0.369016089 | 0.734503   |
| 40.5    | 29      | 0.991312  | 0.017702002  | 0.795113   |
| 1042.01 | 1264.51 | 0.520567  | -1.147102495 | 0.38767    |
| 505.5   | 536     | 0.138408  | -1.148677268 | 0.112268   |
| 1413.5  | 1267.5  | 0.479636  | -0.88762734  | 0.576768   |
| 52      | 39.5    | 0.363018  | -1.530514717 | 0.54711    |
| 8       | 15      | 0.66849   | 0.857980995  | 0.973261   |
| 1.5     | 3       | 0.391002  | -1.584962501 | 0.0877066  |
| 33      | 66      | 0.787472  | -0.489805268 | 0.279052   |
| 47      | 10      | 0.727764  | -0.446064395 | 0.508152   |
| 3       | 2       | 0.806588  | 0.415037499  | 0.630057   |
| 0       | 0.5     | 1         | #DIV/0!      | 0.308068   |
| 106     | 118.5   | 0.263868  | -1.041419927 | 0.190431   |
| 12.5    | 13      | 0.491908  | -1.473931188 | 0.467652   |
| 6       | 6       | 0.567924  | -1           | 0.567924   |
| 0       | 2       | 0.622002  | #DIV/0!      | 0.198892   |
| 2.5     | 2.5     | 0.889735  | -0.321928095 | 0.889735   |
| 0       | 0       | ?         | #DIV/0!      | ?          |

|         |         |           |              |           |
|---------|---------|-----------|--------------|-----------|
| 40      | 26.5    | 0.488584  | -1.074000581 | 0.796855  |
| 52      | 60.5    | 0.906055  | 0.206450877  | 0.994107  |
| 110.92  | 106.229 | 0.793742  | -0.535987869 | 0.82105   |
| 101.58  | 55.2711 | 0.461276  | -1.399686028 | 0.837111  |
| 482.5   | 481.5   | 0.925068  | -0.131386923 | 0.926844  |
| 2.5     | 7.5     | 0.895809  | -0.321928095 | 0.215301  |
| 0       | 0.5     | 1         | #DIV/0!      | 0.308068  |
| 19.2753 | 25.8038 | 0.628003  | -0.891182803 | 0.419556  |
| 1       | 0       | 1         | 0            | 0.450185  |
| 0       | 0       | ?         | #DIV/0!      | ?         |
| 0.5     | 0       | 1         | 0            | 0.450185  |
| 159.5   | 219     | 0.711584  | -0.549228289 | 0.441052  |
| 276.5   | 236     | 0.824109  | -0.240770951 | 0.991615  |
| 1786.5  | 1936    | 0.490835  | -0.820639594 | 0.419272  |
| 0       | 0       | 0.308068  | #DIV/0!      | 0.308068  |
| 787     | 897     | 0.836252  | -0.399841498 | 0.74586   |
| 0       | 1       | 1         | #DIV/0!      | 0.308068  |
| 0       | 0       | 0.308068  | #DIV/0!      | 0.308068  |
| 317.5   | 321     | 0.95954   | 0.06442665   | 0.969297  |
| 28.5    | 27      | 0.888978  | -0.21818017  | 0.930396  |
| 2239.5  | 2265.5  | 0.873703  | -0.278774113 | 0.865479  |
| 262.5   | 240     | 0.758837  | -0.432547268 | 0.836447  |
| 518.5   | 564     | 0.862639  | -0.314296605 | 0.802743  |
| 0       | 0       | ?         | #DIV/0!      | ?         |
| 6.5     | 8.5     | 0.413414  | -1.378511623 | 0.250477  |
| 68.5    | 59.5    | 0.874607  | -0.265142069 | 0.972571  |
| 47      | 29.5    | 0.917859  | -0.111645356 | 0.684397  |
| 0       | 0.5     | 0.450185  | #DIV/0!      | 1         |
| 0       | 0       | 0.308068  | #DIV/0!      | 0.308068  |
| 3.5     | 1.99998 | 0.245192  | -2.807354922 | 0.523245  |
| 3.5     | 0.5     | 1         | 0            | 0.252216  |
| 412.5   | 322.5   | 0.624252  | -0.58758797  | 0.861994  |
| 0       | 0       | 0.308068  | #DIV/0!      | 0.308068  |
| 2       | 2       | 0.604943  | 1.169925001  | 0.604943  |
| 1       | 5.5     | 1         | 0            | 0.403383  |
| 1618    | 1739    | 0.695181  | -0.664935425 | 0.639628  |
| 79.5    | 78.5    | 0.856643  | -0.268488836 | 0.867101  |
| 40.5    | 33.5    | 0.633802  | -0.754887502 | 0.780825  |
| 0       | 1.5     | 1         | #DIV/0!      | 0.308068  |
| 0       | 0       | ?         | #DIV/0!      | ?         |
| 0       | 0       | ?         | #DIV/0!      | ?         |
| 0.5     | 0       | 0.308068  | #NUM!        | 1         |
| 408     | 393.5   | 0.877968  | -0.250360576 | 0.904959  |
| 826.5   | 793.5   | 0.0599085 | -0.911151654 | 0.0737454 |
| 68      | 87.5    | 0.660758  | -0.644519345 | 0.447669  |
| 422.001 | 429.5   | 0.764849  | -0.370163426 | 0.747326  |
| 4080.5  | 4097    | 0.981869  | -0.040515719 | 0.979223  |
| 43.5    | 51      | 0.87959   | -0.273018494 | 0.763394  |
| 0       | 0.5     | 0.0805096 | #DIV/0!      | 0.18169   |
| 2700.5  | 3007.51 | 0.609045  | -0.866167922 | 0.527538  |
| 27.5    | 31      | 0.82817   | -0.321928095 | 0.724417  |
| 0.5     | 0       | 1         | 0            | 0.450185  |
| 444.5   | 464     | 0.574428  | -0.555248277 | 0.526498  |
| 239.5   | 226.5   | 0.862567  | -0.267257225 | 0.906288  |
| 2509.5  | 2312.5  | 0.787012  | -0.380669086 | 0.857598  |
| 243     | 258.5   | 1         | 0            | 0.961557  |

|         |         |          |              |          |
|---------|---------|----------|--------------|----------|
| 84.8967 | 114.297 | 0.925496 | -0.202897204 | 0.736142 |
| 186.5   | 305     | 0.592891 | -0.654288571 | 0.200395 |
| 803.496 | 1125    | 0.781629 | -0.54424376  | 0.540334 |
| 1693    | 1801.5  | 0.742214 | -0.612275274 | 0.697802 |
| 10      | 7.5     | 0.533628 | -1           | 0.749033 |
| 21.5    | 17.5    | 0.694776 | -0.381870635 | 0.936562 |
| 168     | 94.5    | 0.334105 | -2.534336428 | 0.626032 |
| 2       | 3       | 0.545627 | #NUM!        | 0.3832   |
| 1544.5  | 2204    | 0.817881 | -0.645287218 | 0.62145  |
| 931     | 1263    | 0.977105 | 0.052495091  | 0.805627 |
| 222.5   | 328     | 0.64747  | 0.727859283  | 0.897194 |
| 327.5   | 318     | 0.685815 | -0.895919478 | 0.704036 |
| 371.5   | 412.5   | 0.897281 | -0.27043186  | 0.832201 |
| 314.5   | 361     | 0.940865 | -0.13200928  | 0.842284 |
| 850.5   | 593.5   | 0.728409 | -0.28301878  | 0.807824 |
| 5       | 10.5    | 0.784624 | 0.678071905  | 0.819459 |
| 21.5    | 19.5    | 0.96771  | 0.065588342  | 0.903461 |
| 3.5     | 5       | 0.432389 | -2.807354922 | 0.267912 |
| 74.5    | 71.5    | 0.890489 | -0.253384236 | 0.917689 |
| 34      | 35.5    | 0.867535 | -0.306103128 | 0.83757  |
| 0       | 0       | 0.308068 | #DIV/0!      | 0.308068 |
| 0       | 1       | 0.622002 | #DIV/0!      | 0.622002 |
| 23.2857 | 16.9118 | 0.999023 | 0.001541887  | 0.755353 |
| 0       | 1       | 0.308068 | #DIV/0!      | 0.308068 |
| 7.5     | 6.5     | 0.62404  | -1.321928095 | 0.700524 |
| 3       | 1.5     | 0.855216 | 0.222392421  | 0.484842 |
| 1525.5  | 1271.5  | 0.487609 | -0.693187757 | 0.68661  |
| 684.996 | 523.497 | 0.613698 | -0.596578144 | 0.875389 |
| 0.5     | 0       | 1        | 0            | 0.450185 |
| 6.5     | 4.5     | 0.941228 | -0.115477217 | 0.825659 |
| 1.5     | 4.5     | 0.847091 | -0.584962501 | 0.237837 |
| 660     | 573.5   | 0.698861 | -0.410672307 | 0.853843 |
| 106     | 70.5    | 0.806356 | -0.293292227 | 0.840303 |
| 0.5     | 1       | 0.409442 | 2.584962501  | 0.499897 |
| 778.5   | 854.5   | 0.774353 | -0.489509579 | 0.702736 |
| 86      | 96.5    | 0.828664 | -0.403896942 | 0.746811 |
| 65.5    | 76.5    | 1        | 0            | 0.859712 |
| 88.5    | 96      | 0.855209 | -0.338322533 | 0.798205 |
| 2       | 2.5     | 0.265726 | 1.321928095  | 0.338084 |
| 368.5   | 379.5   | 0.773079 | -0.343126456 | 0.742728 |
| 20.5    | 29      | 1        | 0            | 0.805921 |
| 0       | 0       | ?        | #DIV/0!      | ?        |
| 61      | 57.5    | 0.893407 | -0.258311996 | 0.930526 |
| 34.5    | 23.5    | 0.557073 | -0.899071091 | 0.850067 |
| 104.5   | 76      | 0.695033 | -0.652076697 | 0.920849 |
| 901     | 819.5   | 0.848781 | -0.253140872 | 0.933266 |
| 77.5    | 72      | 0.54378  | -0.752562449 | 0.61246  |
| 516     | 734     | 0.354518 | -2.448984831 | 0.196009 |
| 7       | 7       | 0.954155 | 0.099535674  | 0.954155 |
| 0       | 0       | ?        | #DIV/0!      | ?        |
| 10      | 5.5     | 0.598406 | 0.765534746  | 0.405947 |
| 107.5   | 139.5   | 0.981869 | -0.040833718 | 0.792239 |
| 607     | 531     | 0.761137 | -0.569595673 | 0.850621 |
| 385.5   | 417.999 | 0.88478  | -0.270914929 | 0.829187 |
| 1       | 0.5642  | 0.607844 | -1.222861854 | 0.900667 |
| 11      | 10.5    | 0.939563 | -0.137503524 | 0.969748 |



|          |          |          |              |          |
|----------|----------|----------|--------------|----------|
| 0        | 1        | 0.450185 | #DIV/0!      | 1        |
| 2.5      | 1        | 0.888898 | 0.263034406  | 0.586334 |
| 9701.5   | 10350    | 0.565515 | -0.666563284 | 0.50244  |
| 42.5     | 60.5     | 0.920337 | -0.199937571 | 0.674085 |
| 547.5    | 497      | 0.559087 | -0.502390551 | 0.683433 |
| 3.5      | 10.5     | 0.879059 | 0.362570079  | 0.393854 |
| 312      | 393.5    | 0.51123  | -1.257496222 | 0.360359 |
| 0.5      | 4        | 1        | 0            | 0.368766 |
| 1227.5   | 1179.01  | 0.756204 | -0.535290853 | 0.786014 |
| 299.5    | 288      | 0.281773 | -0.873265367 | 0.316828 |
| 11.5     | 14.5     | 1        | 0            | 0.849191 |
| 5.5      | 8        | 0.667494 | 0.932885804  | 0.827714 |
| 0.5      | 2.5      | 1        | 0            | 0.415333 |
| 434.896  | 348.17   | 0.975442 | -0.048873453 | 0.878249 |
| 1185.89  | 1069.87  | 0.959954 | -0.06989002  | 0.957205 |
| 25       | 48       | 0.844837 | -0.64385619  | 0.503534 |
| 592.5    | 518      | 0.291849 | -0.765656498 | 0.440757 |
| 114.5    | 45.5     | 0.919233 | -0.111283334 | 0.490179 |
| 555      | 607.5    | 0.898297 | -0.236760712 | 0.835876 |
| 0        | 2.5      | 1        | #DIV/0!      | 0.308068 |
| 348.412  | 338.371  | 0.783651 | -0.427519178 | 0.80717  |
| 8        | 6        | 0.530478 | -1           | 0.74706  |
| 1184.49  | 813.372  | 0.87985  | -0.186406824 | 0.811266 |
| 34.5     | 34.5     | 0.760488 | -0.553935605 | 0.760488 |
| 1        | 1        | 0.710482 | -1           | 0.710482 |
| 8        | 12.5     | 0.695126 | -1.415037499 | 0.472219 |
| 0        | 0.5      | 1        | #DIV/0!      | 0.308068 |
| 564.933  | 585.545  | 0.873253 | -0.300833984 | 0.849107 |
| 48.8651  | 70.7575  | 0.531876 | -0.990216506 | 0.272666 |
| 823.649  | 688.953  | 0.505866 | -0.34887951  | 0.868727 |
| 647.5    | 683      | 0.758618 | -0.43937946  | 0.711412 |
| 3.03086  | 1.93717  | 0.617998 | -1.014764713 | 0.884276 |
| 723.502  | 815.498  | 0.980927 | -0.039421576 | 0.891468 |
| 0        | 0        | ?        | #DIV/0!      | ?        |
| 181      | 149      | 0.729425 | -0.444563452 | 0.90728  |
| 1.07725  | 0.56062  | 0.102023 | -114.2571813 | 0.311837 |
| 6.5      | 5        | 0.829521 | -0.378511623 | 1        |
| 13.5     | 16       | 0.764066 | 0.493040011  | 0.869178 |
| 0        | 0        | ?        | #DIV/0!      | ?        |
| 0        | 0        | ?        | #DIV/0!      | ?        |
| 107.61   | 93.2231  | 0.912274 | -0.190510014 | 0.992893 |
| 187.945  | 240.398  | 0.80444  | 0.456495644  | 0.950335 |
| 3        | 2.5      | 0.625646 | -1           | 0.741917 |
| 9        | 21.5     | 0.801769 | 0.473931188  | 0.531652 |
| 13       | 25.5     | 0.662062 | -1           | 0.252733 |
| 1.5      | 1        | 0.558168 | -1.593464781 | 0.763519 |
| 6.53E-17 | 2.07E-22 | ?        | #NUM!        | ?        |
| 803.999  | 884.002  | 0.900758 | -0.23740716  | 0.836824 |
| 1        | 0.5      | 0.764931 | 0.584962501  | 0.559404 |
| 92       | 66.5     | 0.498249 | -0.865350473 | 0.78639  |
| 5.5      | 4.5      | 0.556212 | -0.874469118 | 0.718453 |
| 2070.5   | 1533     | 0.5316   | -1.06302224  | 0.746768 |
| 0        | 0        | 0.308068 | #DIV/0!      | 0.308068 |
| 11.5945  | 10.5459  | 0.801058 | 0.367785288  | 0.742115 |
| 0        | 0        | ?        | #DIV/0!      | ?        |
| 129      | 130.5    | 0.804384 | -0.456638404 | 0.796283 |

|          |          |           |              |          |
|----------|----------|-----------|--------------|----------|
| 41.5     | 44.5     | 0.886157  | -0.28757659  | 0.84143  |
| 0        | 0.5      | 0.450185  | #DIV/0!      | 1        |
| 9        | 19       | 0.75577   | -1.169925001 | 0.381924 |
| 6.5      | 11.5     | 0.855216  | -0.378511623 | 0.45258  |
| 273      | 223      | 0.182829  | -3.883303775 | 0.259582 |
| 6        | 17       | 0.924239  | -0.415037499 | 0.452613 |
| 2        | 0        | 0.438509  | -2           | 0.785812 |
| 6.5      | 16       | 0.553186  | 1.428843299  | 0.933386 |
| 197.991  | 190.851  | 0.424677  | -0.870601442 | 0.458591 |
| 258.425  | 266.954  | 0.515134  | -1.731872059 | 0.497071 |
| 3.56196  | 0.26566  | 0.279346  | -5.651930709 | 0.946032 |
| 393.22   | 467.441  | 0.685702  | -0.365359586 | 0.471012 |
| 60.8865  | 32.4548  | 0.216249  | -2.19301578  | 0.574336 |
| 0        | 0.5      | 0.450185  | #DIV/0!      | 1        |
| 2.5      | 2        | 0.860525  | 0.263034406  | 0.72755  |
| 37.5078  | 39       | 0.836525  | -0.396228726 | 0.810194 |
| 2.5      | 6.5      | 0.729943  | -1.321928095 | 0.258834 |
| 37       | 8        | 0.691231  | 0.448758117  | 0.262054 |
| 3.5      | 0        | 0.184922  | #NUM!        | 1        |
| 9        | 10       | 0.455985  | -1.362570079 | 0.387299 |
| 2        | 1        | 0.622002  | 0.584962501  | 0.353387 |
| 3        | 0        | 0.308068  | #NUM!        | 1        |
| 29       | 28.5     | 0.915595  | -0.076621282 | 0.943638 |
| 12.5     | 40.5     | 0.988205  | 0.056583528  | 0.442485 |
| 14       | 10.5     | 0.608078  | -0.900464326 | 0.809259 |
| 0        | 0        | ?         | #DIV/0!      | ?        |
| 0        | 0        | ?         | #DIV/0!      | ?        |
| 0.00019  | 1.5      | 0.999884  | #NUM!        | 0.308068 |
| 2.028    | 2.59E-25 | 0.0691897 | #NUM!        | 1        |
| 0        | 0        | ?         | #DIV/0!      | ?        |
| 2.13E-07 | 4.01E-32 | 0.308068  | -27.12845997 | 1        |
| 1.27E-21 | 0        | ?         | 20.1310387   | ?        |
| 38       | 28       | 0.824764  | -0.389946518 | 0.980281 |
| 0        | 0.5      | 0.450185  | #DIV/0!      | 1        |
| 0        | 0        | ?         | #DIV/0!      | ?        |
| 0        | 0.5      | 1         | #DIV/0!      | 0.308068 |
| 25.5     | 59       | 0.742146  | -0.971985624 | 0.27623  |
| 46       | 40.5     | 0.920788  | -0.131244533 | 0.970229 |
| 1        | 1        | 0.430476  | 2.169925001  | 0.430476 |
| 0        | 0        | 0.308068  | #DIV/0!      | 0.308068 |
| 2.5      | 2        | 1         | 0            | 0.825659 |
| 37.5     | 47.5     | 0.903839  | -0.22881869  | 0.735918 |
| 12       | 19.5     | 0.711975  | -1.125530882 | 0.446246 |
| 1        | 2        | 1         | 0            | 0.450185 |
| 317      | 473      | 0.420954  | -1.986410935 | 0.220691 |
| 2.5      | 3.9358   | 0.56895   | -5.126463574 | 0.384887 |
| 0        | 0.5      | 1         | #DIV/0!      | 0.308068 |
| 116      | 66.5     | 0.960628  | 0.066831508  | 0.62919  |
| 5.5      | 6.554    | 0.658839  | -1.121652032 | 0.555632 |
| 581      | 608.5    | 0.833135  | -0.308950241 | 0.793469 |
| 0        | 0        | ?         | #DIV/0!      | ?        |
| 0.5      | 0        | 0.308068  | #NUM!        | 1        |
| 0.06142  | 0.07359  | 0.484387  | -46.92275601 | 0.410813 |
| 6        | 8.5      | 0.887388  | -0.263034406 | 0.627321 |
| 6.34E-17 | 2.07E-22 | ?         | #NUM!        | ?        |
| 2.229    | 0.07359  | 0.308286  | -52.10423923 | 0.970304 |

|          |          |           |              |            |
|----------|----------|-----------|--------------|------------|
| 109.5    | 127.5    | 0.483696  | -1.174874217 | 0.377906   |
| 5        | 5.5      | 0.879601  | 0.263034406  | 0.939529   |
| 0        | 0        | 0.308068  | #DIV/0!      | 0.308068   |
| 0        | 0        | 0.308068  | #DIV/0!      | 0.308068   |
| 13       | 8.5      | 1         | 0            | 0.761184   |
| 4.78E-25 | 0.07359  | 1         | #NUM!        | 0.308068   |
| 0        | 0        | ?         | #DIV/0!      | ?          |
| 0        | 0        | ?         | #DIV/0!      | ?          |
| 6.34E-17 | 2.12E-11 | ?         | #NUM!        | ?          |
| 1.92E-08 | 4.60E-10 | 0.308068  | 26.22264364  | 0.308068   |
| 1.5      | 1        | 0.559404  | -1.584962501 | 0.764931   |
| 33       | 72       | 0.979677  | -0.067114196 | 0.509504   |
| 998.495  | 1167.49  | 0.995479  | 0.010817538  | 0.903283   |
| 12       | 21       | 0.0210425 | -1.415037499 | 0.00225647 |
| 0.5      | 0.5      | 0.450185  | #NUM!        | 0.450185   |
| 198.5    | 227      | 0.768599  | -0.438238343 | 0.652419   |
| 131.574  | 163.395  | 0.149907  | -1.776038885 | 0.0816031  |
| 71588.8  | 69912.2  | 0.437036  | -1.238959859 | 0.453974   |
| 558.925  | 565.507  | 0.0810829 | -1.041213722 | 0.0770463  |
| 0.4568   | 0        | 0.942654  | 0.130352811  | 0.432532   |
| 0.00059  | 0.00927  | 0.943752  | -5.692866524 | 0.309379   |
| 137.018  | 141.945  | 0.947469  | 0.119910497  | 0.969241   |
| 547.5    | 629.5    | 0.59232   | -0.63114875  | 0.457816   |
| 0.5      | 0        | 0.308068  | #NUM!        | 1          |
| 2        | 5.5      | 0.921239  | -0.415037499 | 0.453341   |
| 24.6049  | 21.6953  | 0.708205  | -0.720287055 | 0.792215   |
| 0        | 0        | ?         | #DIV/0!      | ?          |
| 0.5      | 0        | 0.308068  | #NUM!        | 1          |
| 6.01737  | 2.70683  | 0.391993  | -3.280448343 | 0.725382   |
| 61.5     | 53       | 0.751985  | -0.533123569 | 0.860453   |
| 2        | 3        | 0.18169   | #NUM!        | 0.0805096  |
| 1468.5   | 1410.5   | 0.983186  | -0.036311773 | 0.990095   |
| 943.5    | 796      | 0.218024  | -0.814444347 | 0.394827   |
| 120.5    | 109.5    | 0.599155  | -0.693720816 | 0.685996   |
| 1.22E-05 | 1.15E-05 | 0.307741  | 16.75101287  | 0.307741   |
| 5        | 3.5      | 0.659329  | -0.736965594 | 0.91071    |
| 74.5     | 84       | 0.432966  | -0.792903766 | 0.324534   |
| 0        | 0        | ?         | #DIV/0!      | ?          |
| 0        | 0        | ?         | #DIV/0!      | ?          |
| 0        | 0        | 0.308068  | #DIV/0!      | 0.308068   |
| 7.48E-16 | 1.77E-14 | ?         | #NUM!        | ?          |
| 1062.86  | 823.684  | 0.161498  | -1.328741191 | 0.330662   |
| 1.5051   | 0.62619  | 0.340377  | #NUM!        | 0.670117   |
| 1.5      | 0.5      | 0.513713  | -1.584962501 | 1          |
| 29.5     | 29.5     | 0.760545  | -0.59724083  | 0.760546   |
| 1        | 2        | 1         | 0            | 0.651448   |
| 80       | 65       | 0.964108  | 0.087461144  | 0.857558   |
| 1.5      | 0.5      | 1         | 0            | 0.513713   |
| 20       | 25.5     | 0.721174  | -0.862496476 | 0.572419   |
| 1567.5   | 1598     | 0.106061  | -0.986715843 | 0.0977211  |
| 2.40453  | 4.3608   | 0.908057  | 0.319207575  | 0.792914   |
| 203.169  | 266.1    | 0.953951  | -0.108207611 | 0.762101   |
| 0.5      | 0        | 1         | 0            | 0.450185   |
| 105.548  | 145.291  | 0.728806  | -0.793228766 | 0.52378    |
| 91.5     | 95.5     | 0.951393  | -0.123382416 | 0.925567   |
| 4.49147  | 2.26605  | 0.236628  | -3.835257812 | 0.540222   |

|          |         |            |              |             |
|----------|---------|------------|--------------|-------------|
| 4        | 5       | 0.680109   | -1           | 0.544016    |
| 7.84813  | 11.7634 | 0.00210508 | -29.11636469 | 0.000637389 |
| 0.5      | 4.5     | 0.825659   | #NUM!        | 0.119381    |
| 2.5      | 4       | 0.900374   | -0.321928095 | 0.624065    |
| 576.5    | 721     | 0.954286   | 0.117689277  | 0.911119    |
| 1        | 1       | 0.710482   | -1           | 0.710482    |
| 9.5      | 7.5     | 0.898973   | 0.144389909  | 0.706667    |
| 36.5     | 32.5    | 0.963868   | 0.058102955  | 0.868394    |
| 0        | 0       | ?          | #DIV/0!      | ?           |
| 652.5    | 592     | 0.792303   | -0.347019076 | 0.880931    |
| 134.5    | 111.5   | 0.945854   | 0.10346332   | 0.823415    |
| 1462.93  | 1469.2  | 0.276562   | -0.881618938 | 0.272956    |
| 17       | 9       | 0.477027   | -1.087462841 | 0.933926    |
| 2.5      | 3.5     | 0.770719   | -0.736965594 | 0.568955    |
| 142.408  | 161.753 | 0.300133   | -0.861975299 | 0.202281    |
| 215.48   | 238.849 | 0.873053   | -0.148473803 | 0.738219    |
| 0        | 0       | ?          | #DIV/0!      | ?           |
| 67.5944  | 134.118 | 0.282408   | -1.294992806 | 0.0401203   |
| 215.48   | 238.849 | 0.873053   | -0.148473803 | 0.738219    |
| 15       | 17      | 0.572482   | -2.099535674 | 0.512179    |
| 13       | 10      | 0.607715   | -1.378511623 | 0.74463     |
| 29.5     | 23      | 0.700981   | -0.59724083  | 0.89177     |
| 27.6498  | 44.7635 | 0.515903   | -0.388597733 | 0.0763793   |
| 0.05479  | 0.07359 | 0.51747    | #NUM!        | 0.398366    |
| 132      | 109.5   | 0.400208   | -2.489805268 | 0.494731    |
| 93.4678  | 111.365 | 0.324005   | -1.764885687 | 0.2314      |
| 14       | 13      | 0.88766    | -0.283792966 | 0.932371    |
| 307      | 264.5   | 0.579438   | -0.621849909 | 0.732872    |
| 80.3335  | 117.664 | 0.38611    | -1.284139144 | 0.168037    |
| 5.5      | 14.5    | 0.958849   | 0.125530882  | 0.411194    |
| 93.5     | 92      | 0.889947   | -0.261492241 | 0.900505    |
| 1        | 2       | 0.806588   | -1           | 0.481309    |
| 306.5    | 259     | 0.980415   | 0.034877485  | 0.857561    |
| 195      | 143.5   | 0.916291   | -0.139724764 | 0.845305    |
| 3        | 3.5     | 0.878232   | -0.263034406 | 0.76082     |
| 34       | 30      | 0.508051   | -0.958179824 | 0.609951    |
| 0        | 0       | ?          | #DIV/0!      | ?           |
| 1344.5   | 1332.5  | 0.222029   | -1.040810614 | 0.228267    |
| 28       | 30.5    | 0.681989   | -0.853158612 | 0.625287    |
| 5.5      | 3.5     | 0.805463   | -0.289506617 | 0.805463    |
| 355      | 324.5   | 0.940618   | -0.094464684 | 0.97886     |
| 0        | 0       | ?          | #DIV/0!      | ?           |
| 47.5     | 36.5    | 0.335562   | -0.814968106 | 0.632686    |
| 1.27E-21 | 0       | ?          | 20.1310387   | ?           |
| 104      | 183.5   | 0.393678   | -0.634350528 | 0.0521327   |
| 2042.99  | 2146.5  | 0.7705     | -0.485207932 | 0.73204     |
| 0        | 0       | ?          | #DIV/0!      | ?           |
| 800.53   | 855.099 | 0.496894   | -0.716278479 | 0.432072    |
| 19       | 22      | 0.848139   | -0.440572591 | 0.760556    |
| 2.5      | 3.5     | 0.397364   | 1.378511623  | 0.513713    |
| 9        | 7       | 0.794897   | -0.469485283 | 0.958279    |
| 1389.18  | 1464.87 | 0.686356   | -0.49754731  | 0.633863    |
| 73.9807  | 54.3196 | 0.616857   | 0.8573351    | 0.513828    |
| 0        | 0       | ?          | #DIV/0!      | ?           |
| 90       | 58      | 0.705375   | -0.723668772 | 0.969861    |
| 0        | 0       | ?          | #DIV/0!      | ?           |

|         |         |          |              |          |
|---------|---------|----------|--------------|----------|
| 7       | 3       | 0.29798  | -1.485426827 | 0.897841 |
| 2       | 0.5     | 0.630057 | -1           | 0.806588 |
| 50      | 45      | 0.593861 | -0.514573173 | 0.718239 |
| 1       | 3.5     | 0.878232 | -1           | 0.391002 |
| 1       | 1       | 0.710482 | -1           | 0.710482 |
| 84.5    | 73.5    | 0.944613 | -0.097098688 | 0.944613 |
| 35.5    | 31.5    | 0.767807 | -0.449307401 | 0.863537 |
| 162.5   | 157.5   | 0.906341 | -0.225354835 | 0.926167 |
| 154     | 209.5   | 0.940635 | -0.122128298 | 0.689736 |
| 2.55269 | 5.70313 | 0.603501 | 0.878485965  | 0.802544 |
| 9.44731 | 9.29687 | 0.952188 | -0.101249657 | 0.963408 |
| 228.5   | 242.5   | 0.309746 | -0.959533408 | 0.263255 |
| 0       | 0       | ?        | #DIV/0!      | ?        |
| 64.298  | 93.1583 | 0.697651 | -0.580437203 | 0.387917 |
| 0       | 5.5     | 0.598767 | #DIV/0!      | 0.658534 |
| 89.5    | 78      | 0.827931 | -0.198413558 | 1        |
| 38      | 35.5    | 0.931051 | -0.139403057 | 0.980265 |
| 2283    | 2449.46 | 0.845017 | -0.375740747 | 0.797207 |
| 3.5     | 5       | 1        | 0            | 0.791627 |
| 29      | 39.5    | 0.776018 | 0.351472371  | 0.92866  |
| 27      | 25.5    | 0.863069 | -0.111031312 | 0.965517 |
| 361.5   | 363.5   | 0.748094 | -0.526308283 | 0.74378  |
| 28.1951 | 29.3478 | 0.534162 | -1.046194767 | 0.504689 |
| 1635.71 | 1501.89 | 0.79993  | -0.435828315 | 0.86149  |
| 2705.5  | 2783    | 0.889539 | -0.21000338  | 0.866494 |
| 1310    | 1397.5  | 0.826908 | -0.322616568 | 0.771402 |
| 206.5   | 216.5   | 0.864669 | -0.297680549 | 0.830269 |
| 1784.5  | 1729.5  | 0.911075 | -0.219162204 | 0.930434 |
| 491     | 648.5   | 0.668044 | -1.161502085 | 0.508486 |
| 75      | 132     | 0.977455 | 0.065802058  | 0.671121 |
| 48.5    | 250.5   | 0.928501 | 0.444481277  | 0.379747 |
| 348     | 463     | 0.993483 | -0.016678741 | 0.809044 |
| 350.5   | 321     | 0.767727 | -0.487486349 | 0.834042 |
| 15.5    | 6.5     | 0.635961 | -0.866733469 | 0.890299 |
| 388.5   | 369.5   | 0.738902 | -0.360979456 | 0.794291 |
| 145.5   | 60.5    | 0.928782 | -0.124179411 | 0.596329 |
| 584     | 444.5   | 0.933831 | 0.105944376  | 0.734037 |
| 554.5   | 575     | 0.927181 | -0.169599814 | 0.903073 |
| 348.5   | 390     | 0.841843 | -0.349617823 | 0.757842 |
| 1629.5  | 1636.5  | 0.798034 | -0.349977191 | 0.794146 |
| 840     | 1106.5  | 0.889342 | -0.313366081 | 0.71782  |
| 6977    | 6216.5  | 0.819301 | -0.433698831 | 0.894212 |
| 564.5   | 494     | 0.835522 | -0.379278538 | 0.923704 |
| 831.003 | 1009    | 0.906916 | -0.234162083 | 0.777699 |
| 3.5     | 4       | 1        | 0            | 0.914417 |
| 298.5   | 458.5   | 0.880242 | 0.296086203  | 0.83877  |
| 0       | 0       | 0.308068 | #DIV/0!      | 0.308068 |
| 764.738 | 968.929 | 0.986219 | 0.038144217  | 0.877202 |
| 389     | 498.5   | 0.8879   | -0.299845597 | 0.727096 |
| 96.5    | 106.5   | 0.556276 | -0.850990051 | 0.475367 |
| 26.5    | 42      | 0.709115 | -0.727920455 | 0.384425 |
| 33.5    | 34      | 0.701231 | -0.606657572 | 0.689265 |
| 2874.5  | 3475.5  | 0.933366 | 0.165093158  | 0.95168  |
| 194.5   | 221     | 0.93999  | -0.156543119 | 0.861381 |
| 771     | 858     | 0.824537 | -0.49123924  | 0.758784 |
| 4       | 15      | 0.971028 | -0.192645078 | 0.431363 |

|         |         |          |              |          |
|---------|---------|----------|--------------|----------|
| 262     | 268.5   | 0.609579 | -0.776035159 | 0.589511 |
| 676     | 860.996 | 0.639212 | -1.292349752 | 0.502528 |
| 74.5    | 96.5001 | 0.934931 | 0.155870911  | 0.896927 |
| 434     | 437     | 0.910929 | -0.191695624 | 0.906016 |
| 2458.03 | 6147.73 | 0.7995   | -1.047753809 | 0.35775  |
| 2573.5  | 2706.5  | 0.921857 | -0.195731658 | 0.890296 |
| 707.5   | 833     | 0.990776 | -0.021571492 | 0.881219 |
| 16      | 6       | 0.669928 | 0.754887502  | 0.435036 |
| 3       | 0.5     | 0.855216 | -0.263034406 | 0.484842 |
| 3.5     | 3.5     | 0.19041  | -2.807354922 | 0.19041  |
| 13.5    | 13.5    | 0.801376 | -0.432959407 | 0.801376 |
| 3145.5  | 2324    | 0.432252 | -1.333671428 | 0.643277 |
| 1804.5  | 1870    | 0.945304 | -0.127822174 | 0.921988 |
| 1116    | 936.5   | 0.903705 | 0.223500057  | 0.81329  |
| 5735.55 | 6167.5  | 0.856171 | 0.350346071  | 0.895155 |
| 232     | 190     | 0.931528 | -0.113147158 | 0.904316 |
| 536     | 609.5   | 0.942217 | -0.139793196 | 0.857429 |
| 1067    | 2154.5  | 0.82267  | 0.570012159  | 0.804871 |
| 1106    | 1228.5  | 0.967027 | 0.079935886  | 0.968871 |
| 1261.5  | 1501.5  | 0.989163 | 0.028871847  | 0.909146 |
| 585.496 | 809.008 | 0.823061 | -0.515795863 | 0.618457 |
| 2253.04 | 2002.5  | 0.842881 | -0.245114395 | 0.95427  |
| 5476.53 | 5883.47 | 0.777774 | -0.48998772  | 0.723706 |
| 732.5   | 721.5   | 0.678813 | -0.526580985 | 0.69332  |
| 666.5   | 649.5   | 0.958379 | 0.083063308  | 0.940511 |
| 0.5     | 0       | 0.308068 | #NUM!        | 1        |
| 126     | 124     | 0.803308 | -0.430385464 | 0.815059 |
| 0       | 0       | ?        | #DIV/0!      | ?        |
| 51      | 55.5    | 0.734606 | -0.650057529 | 0.675201 |
| 3047.5  | 2208    | 0.825332 | -0.360306286 | 0.956431 |
| 745.65  | 646.889 | 0.924631 | -0.108957134 | 0.938088 |
| 0       | 2       | 0.515664 | #DIV/0!      | 0.822295 |
| 111.5   | 86.4999 | 0.852585 | -0.238657476 | 0.930139 |
| 0       | 0.5     | 1        | #DIV/0!      | 0.308068 |
| 592     | 682.5   | 0.319711 | -0.750021747 | 0.19986  |
| 40      | 47.5    | 0.880379 | -0.234465254 | 0.737096 |
| 0       | 0       | ?        | #DIV/0!      | ?        |
| 729.002 | 717.496 | 0.883011 | -0.20600278  | 0.896758 |
| 0       | 0       | ?        | #DIV/0!      | ?        |
| 293.5   | 341.5   | 0.821191 | -0.486410259 | 0.724326 |
| 69      | 129.5   | 0.867257 | -0.508611615 | 0.52423  |
| 98.5    | 92      | 0.889862 | 0.2483129    | 0.851776 |
| 134     | 161.5   | 0.886701 | -0.311201688 | 0.770763 |
| 95      | 89      | 0.917219 | -0.168976172 | 0.96444  |
| 15.8204 | 17.2573 | 0.765822 | -0.696753205 | 0.713729 |
| 26.5    | 27.5    | 0.842936 | 0.249359469  | 0.873886 |
| 1565.5  | 1600    | 0.780807 | -0.425674504 | 0.76275  |
| 607.139 | 550.715 | 0.779457 | -0.436410713 | 0.856277 |
| 1143    | 1117    | 0.615665 | -0.633088879 | 0.637487 |
| 12.5    | 19      | 0.763698 | -0.943416472 | 0.542149 |
| 978.874 | 1050.14 | 0.851316 | 0.311784988  | 0.895697 |
| 32.5    | 37.5    | 0.804745 | 0.36994961   | 0.906362 |
| 1597    | 1578.5  | 0.603668 | -0.809841354 | 0.612997 |
| 101.5   | 113     | 0.835799 | 0.271302022  | 0.925053 |
| 366.5   | 333     | 0.801299 | -0.440853791 | 0.869048 |
| 344.5   | 408.999 | 0.945138 | 0.131976483  | 0.947632 |

|         |         |          |              |          |
|---------|---------|----------|--------------|----------|
| 100.5   | 92      | 0.46098  | -0.950611973 | 0.536764 |
| 53.5    | 48      | 0.865346 | -0.33207605  | 0.932293 |
| 178     | 175.5   | 0.926068 | -0.149303944 | 0.936592 |
| 262     | 306.5   | 0.865512 | -0.353942902 | 0.76431  |
| 2282.51 | 2179.44 | 0.798165 | -0.328634066 | 0.841854 |
| 215     | 166.5   | 0.63348  | 0.591657153  | 0.500303 |
| 378     | 398.5   | 0.351895 | -1.038680468 | 0.311067 |
| 29      | 20      | 0.947223 | 0.072756342  | 0.649478 |
| 494     | 584.5   | 0.600433 | -1.626439137 | 0.512    |
| 24      | 23      | 0.661348 | -0.726981506 | 0.694066 |
| 556.5   | 1023.01 | 0.941842 | 0.106171907  | 0.487002 |
| 2318.5  | 2738.5  | 0.898312 | -0.268708056 | 0.792784 |
| 626.5   | 775.5   | 0.843719 | -0.437861144 | 0.709397 |
| 312.5   | 351     | 0.969307 | 0.076422275  | 0.961191 |
| 774.5   | 812     | 0.986057 | -0.03201935  | 0.955333 |
| 2.5     | 4.5     | 0.568955 | -2.321928095 | 0.291911 |
| 198.5   | 216.5   | 0.833797 | -0.389821214 | 0.772503 |
| 6       | 11      | 0.622002 | 1.115477217  | 0.885583 |
| 466     | 611     | 0.85944  | -0.386427878 | 0.684483 |
| 1060.5  | 1030.5  | 0.690795 | 0.619250839  | 0.675871 |
| 81.5    | 76.5    | 0.734955 | 0.599639077  | 0.705561 |
| 15      | 15      | 0.728778 | -0.819427754 | 0.728778 |
| 8252    | 5491.5  | 0.470704 | -1.804429492 | 0.691406 |
| 4625    | 3969.5  | 0.730398 | -0.650695935 | 0.832456 |
| 1080    | 824.5   | 0.498573 | -1.699605067 | 0.64815  |
| 120     | 144     | 0.524682 | -1.678071905 | 0.422425 |
| 412.499 | 291.5   | 0.823416 | -0.366318717 | 0.944947 |
| 291.5   | 270     | 0.664556 | -0.613704886 | 0.73113  |
| 63.5    | 58      | 0.528565 | -1.779231321 | 0.576975 |
| 121.5   | 248     | 0.754851 | -1.079322453 | 0.383532 |
| 329     | 206     | 0.795695 | -0.425305835 | 0.903836 |
| 1401    | 1355    | 0.653903 | -0.737995723 | 0.679755 |
| 3       | 0.5     | 0.57998  | 0.874469118  | 0.304033 |
| 18.5    | 16      | 0.667232 | -0.817135943 | 0.765459 |
| 2662.47 | 2735.45 | 0.838801 | -0.33295369  | 0.817916 |
| 1366.5  | 1807.49 | 0.590381 | -1.550542659 | 0.436706 |
| 2813.59 | 2946.02 | 0.751442 | -0.467730741 | 0.711904 |
| 800     | 842.5   | 0.197359 | -0.957355663 | 0.164417 |
| 421.5   | 459.5   | 0.433169 | -0.551970675 | 0.330387 |
| 469     | 499.5   | 0.748257 | -0.604317433 | 0.703645 |
| 406.5   | 503     | 0.755479 | -0.365615347 | 0.532731 |
| 4913.14 | 4484.99 | 0.791527 | -0.374424662 | 0.869551 |
| 1727    | 1775.5  | 0.729557 | -0.634462747 | 0.709655 |
| 746.5   | 613     | 0.621081 | -0.403168679 | 0.892917 |
| 2501    | 2320    | 0.392323 | -0.791435565 | 0.469386 |
| 587     | 600.5   | 0.702994 | -0.417497338 | 0.678065 |
| 622.5   | 559     | 0.690545 | -0.497295181 | 0.794032 |
| 2011.5  | 1916    | 0.722226 | -0.460821909 | 0.768093 |
| 2850.06 | 3049.52 | 0.775366 | -0.409705288 | 0.715596 |
| 2505.5  | 2690    | 0.568137 | -0.956050894 | 0.514858 |
| 3028.5  | 3490.5  | 0.740858 | -0.475930693 | 0.614786 |
| 9895    | 15865   | 0.970519 | -0.085518628 | 0.676373 |
| 1046    | 1452    | 0.884149 | -0.303597578 | 0.662397 |
| 13.5    | 14.5    | 0.787885 | -0.432959407 | 0.730541 |
| 4367.55 | 4437.06 | 0.767819 | -0.441130706 | 0.754473 |
| 406.5   | 656.5   | 0.786974 | -0.821621491 | 0.526903 |

|         |         |          |              |          |
|---------|---------|----------|--------------|----------|
| 1674.5  | 1833    | 0.923316 | -0.184483316 | 0.863572 |
| 1166.5  | 1087    | 0.865136 | -0.225074587 | 0.928378 |
| 1557    | 1397    | 0.721304 | -0.539810464 | 0.809657 |
| 3133    | 2911    | 0.789815 | -0.40052872  | 0.849878 |
| 5055.48 | 4492.35 | 0.863722 | -0.262620104 | 0.954624 |
| 224.5   | 506     | 0.767074 | -0.856375324 | 0.305613 |
| 101.5   | 119     | 0.773758 | -0.631912916 | 0.672099 |
| 109     | 137.5   | 0.765253 | -0.670152242 | 0.616464 |
| 120.794 | 107.95  | 0.955259 | 0.064579964  | 0.852549 |
| 2463.5  | 3011.5  | 0.636025 | -0.500793269 | 0.424138 |
| 1216.51 | 1258    | 0.841335 | 0.394872813  | 0.858219 |
| 65      | 76      | 0.630052 | -0.546634382 | 0.471638 |
| 6       | 6       | 0.756486 | -0.584962501 | 0.756486 |
| 786.5   | 823     | 0.879103 | -0.208851604 | 0.838258 |
| 14.5    | 17      | 0.753182 | -0.688055994 | 0.650732 |
| 336     | 331     | 0.967078 | -0.063642495 | 0.978425 |
| 842.551 | 1013.98 | 0.536674 | -1.187960273 | 0.413086 |
| 0       | 0       | ?        | #DIV/0!      | ?        |
| 132     | 96.5    | 0.934216 | -0.078609835 | 0.739326 |
| 438.5   | 289     | 0.669579 | -0.429919299 | 0.888663 |
| 3397.5  | 3509    | 0.645857 | -0.669899653 | 0.618247 |
| 275     | 273.5   | 0.695785 | -0.416787281 | 0.701905 |
| 623     | 630     | 0.849312 | -0.259334    | 0.839233 |
| 416.683 | 446.388 | 0.323609 | -0.773429653 | 0.261228 |
| 18      | 29.5    | 0.931752 | -0.215728691 | 0.638438 |
| 129.488 | 134.068 | 0.79418  | -0.400833121 | 0.765456 |
| 70.5    | 63      | 0.941125 | -0.106128351 | 0.970531 |
| 1693    | 1557.71 | 0.515739 | -0.982214864 | 0.581592 |
| 533     | 576     | 0.858661 | -0.249027548 | 0.788948 |
| 920.5   | 691     | 0.910949 | -0.16855427  | 0.887915 |
| 1341    | 1344.5  | 0.993084 | 0.01657981   | 0.994646 |
| 14.5    | 17.5    | 0.823359 | 0.427421224  | 0.928568 |
| 27      | 27.5    | 0.81744  | -0.328622747 | 0.801363 |
| 3588    | 3486    | 0.698352 | -0.548338619 | 0.723672 |
| 960.5   | 866.5   | 0.971558 | 0.045099444  | 0.884503 |
| 1736.5  | 1791    | 0.736422 | -0.567825457 | 0.712668 |
| 640.5   | 408.5   | 0.556347 | -0.736214972 | 0.954547 |
| 551.5   | 478.5   | 0.74671  | -0.494348578 | 0.859626 |
| 31      | 32.4272 | 0.86179  | -0.175856299 | 0.807798 |
| 4641.98 | 4709.95 | 0.792859 | -0.396924703 | 0.780738 |
| 852.387 | 758.232 | 0.369482 | -2.127782941 | 0.433281 |
| 99.6137 | 177.267 | 0.556766 | -1.430129619 | 0.236267 |
| 80      | 84.5    | 0.911142 | -0.223896012 | 0.876746 |
| 59.5    | 67      | 0.877141 | 0.295006796  | 0.945122 |
| 25484.5 | 27593.5 | 0.752352 | -0.711870709 | 0.703261 |
| 1131.5  | 1171    | 0.725654 | -0.514664249 | 0.696066 |
| 2510    | 2529.5  | 0.430708 | -0.666849996 | 0.422165 |
| 327.5   | 315     | 0.730093 | -0.448460501 | 0.766775 |
| 1547    | 1523.5  | 0.751452 | -0.390686337 | 0.766625 |
| 3794.5  | 3503    | 0.818078 | -0.427703129 | 0.871656 |
| 0.00726 | 0       | 0.310998 | 7.105796852  | 0.308079 |
| 2039.49 | 1804.51 | 0.778886 | -0.362351819 | 0.891897 |
| 2.5     | 0.5     | 0.706667 | -0.736965594 | 0.706667 |
| 1607.5  | 810.5   | 0.483937 | -1.228538256 | 0.921095 |
| 1591    | 1381    | 0.487378 | -0.680794828 | 0.643589 |
| 348     | 294     | 0.717191 | -0.557247123 | 0.850478 |



|         |         |          |              |          |
|---------|---------|----------|--------------|----------|
| 276.5   | 209.5   | 0.712457 | -0.552714957 | 0.929056 |
| 2832.44 | 4855.73 | 0.870488 | -0.372109604 | 0.515675 |
| 394.999 | 380.5   | 0.846196 | -0.368317348 | 0.870875 |
| 2445    | 2503    | 0.970488 | -0.071053297 | 0.95594  |
| 6081.77 | 4865.28 | 0.202009 | -0.873329744 | 0.429502 |
| 4362.5  | 5126.5  | 0.914832 | -0.156511375 | 0.773981 |
| 50.5    | 41.5    | 0.802099 | -0.429392792 | 0.938197 |
| 1237.5  | 1151    | 0.671536 | -0.532588765 | 0.741208 |
| 5       | 10.5    | 0.83759  | -0.736965594 | 0.463708 |
| 75      | 67.5    | 0.959426 | -0.068947354 | 0.95364  |
| 120.5   | 108.5   | 0.939637 | 0.058654218  | 0.797946 |
| 663.5   | 621     | 0.735922 | -0.456580576 | 0.795803 |
| 491     | 553.5   | 0.851563 | -0.396547394 | 0.775661 |
| 92      | 131     | 0.621385 | -1.238159737 | 0.411101 |
| 11.5    | 14.5    | 0.914245 | -0.201633861 | 0.748768 |
| 1646    | 1636    | 0.929047 | -0.170527711 | 0.932898 |
| 971     | 964     | 0.913587 | -0.207365495 | 0.918214 |
| 660.498 | 619.999 | 0.898148 | -0.230424396 | 0.940287 |
| 167.5   | 287.5   | 0.993284 | 0.021373651  | 0.696553 |
| 1469.5  | 1518.5  | 0.932082 | -0.158617838 | 0.910456 |
| 1630    | 1763    | 0.815402 | -0.469144905 | 0.763382 |
| 561.5   | 467     | 0.633902 | -0.899522536 | 0.758571 |
| 479.5   | 634.5   | 0.983344 | 0.044439706  | 0.846047 |
| 5780    | 6130    | 0.831455 | -0.339980659 | 0.784506 |
| 5196.5  | 4383    | 0.961511 | -0.069237631 | 0.910149 |
| 1670.51 | 1718.01 | 0.822097 | -0.35238572  | 0.799487 |
| 730     | 671.5   | 0.962752 | 0.081638469  | 0.911715 |
| 581     | 559.5   | 0.869442 | -0.280019239 | 0.896554 |
| 400.5   | 352     | 0.549624 | -1.178052882 | 0.635115 |
| 5557    | 5146    | 0.379928 | -0.75096612  | 0.462606 |
| 198.348 | 229.338 | 0.891378 | -0.240835528 | 0.784191 |
| 267.5   | 287.501 | 0.496836 | -1.362955363 | 0.450489 |
| 137.5   | 91      | 0.682727 | -0.710970386 | 0.956675 |
| 8932.5  | 9805.5  | 0.625607 | -1.380014456 | 0.574678 |
| 13732.2 | 15628.6 | 0.603482 | -1.489502997 | 0.532912 |
| 1429.5  | 1316    | 0.615734 | -0.642091117 | 0.693135 |
| 30.5    | 39      | 0.837478 | -0.258311996 | 0.588731 |
| 3812.98 | 4032.42 | 0.585071 | -1.387918086 | 0.552705 |
| 2399.5  | 2554.5  | 0.785445 | -0.419553923 | 0.733442 |
| 2400.5  | 2965.5  | 0.645256 | -0.675489927 | 0.466969 |
| 1098.51 | 1121.51 | 0.730832 | -0.559273551 | 0.714448 |
| 784     | 776     | 0.746179 | -0.493176327 | 0.75467  |
| 3555.01 | 4115.47 | 0.622514 | -0.584650053 | 0.479386 |
| 1336.5  | 1670    | 0.836718 | -0.436607184 | 0.690209 |
| 1155.32 | 1463.98 | 0.760373 | -0.708049285 | 0.612139 |
| 1342    | 1419.5  | 0.863926 | -0.33761449  | 0.827094 |
| 15      | 24      | 0.491936 | 1.359895945  | 0.662983 |
| 869.504 | 826.999 | 0.853378 | -0.341984088 | 0.886929 |
| 915.5   | 1032    | 0.907714 | -0.232012714 | 0.830113 |
| 1047    | 1227.5  | 0.875393 | -0.317800209 | 0.770396 |
| 626.5   | 920.5   | 0.938055 | 0.161070541  | 0.818081 |
| 5122    | 5415    | 0.829394 | -0.391938983 | 0.789728 |
| 11      | 7       | 0.895104 | 0.184424571  | 0.63554  |
| 4771    | 5200.5  | 0.570971 | -0.963867282 | 0.50697  |
| 1820.5  | 1826.5  | 0.867025 | -0.26216295  | 0.864427 |
| 7571.03 | 7891.27 | 0.762395 | -0.625128014 | 0.735388 |

|         |         |          |              |           |
|---------|---------|----------|--------------|-----------|
| 1262.5  | 1380.5  | 0.895521 | -0.22792621  | 0.829986  |
| 3083.56 | 2511.02 | 0.465317 | -1.746460152 | 0.582846  |
| 1054.5  | 961.487 | 0.919489 | 0.167109986  | 0.862378  |
| 3359    | 2911    | 0.490751 | -0.802798672 | 0.627748  |
| 1555    | 1469    | 0.785399 | -0.498100111 | 0.824904  |
| 2017    | 1878    | 0.690445 | -0.724738789 | 0.741161  |
| 24      | 23.5    | 0.97068  | -0.061400545 | 0.985336  |
| 2082.53 | 2248.04 | 0.809806 | -0.473394014 | 0.758108  |
| 805.998 | 719.505 | 0.42205  | -1.799764065 | 0.488263  |
| 700     | 639.003 | 0.740171 | -0.430222842 | 0.825213  |
| 205.5   | 178.5   | 0.524238 | -0.982554866 | 0.634352  |
| 338.5   | 229.5   | 0.878624 | 0.180070744  | 0.609458  |
| 1422.01 | 1453    | 0.820814 | -0.375025798 | 0.80427   |
| 267.5   | 279.999 | 0.958159 | -0.094728288 | 0.927503  |
| 2263.5  | 2260.5  | 0.727508 | -0.550948468 | 0.728576  |
| 26751.8 | 15775.4 | 0.886838 | 0.202661895  | 0.60512   |
| 1801.5  | 1635    | 0.892906 | -0.202114439 | 0.968486  |
| 4750    | 4000.5  | 0.614658 | -0.635339107 | 0.775564  |
| 10355.1 | 10686.3 | 0.76925  | -0.598891385 | 0.748613  |
| 616.5   | 708.5   | 0.930389 | -0.168609274 | 0.837674  |
| 1276    | 1319    | 0.840964 | -0.324474278 | 0.815054  |
| 3386.5  | 2846    | 0.847246 | -0.256446261 | 0.996924  |
| 1299.5  | 1349.5  | 0.799489 | -0.425623067 | 0.770524  |
| 664.503 | 773.501 | 0.886305 | -0.268906979 | 0.77997   |
| 1237.7  | 1430.3  | 0.887438 | -0.316695195 | 0.800843  |
| 11821   | 11738   | 0.61121  | -0.677608208 | 0.617593  |
| 5382.91 | 5338.43 | 0.66036  | -0.770522253 | 0.666507  |
| 210.5   | 151.5   | 0.498683 | -1.786939086 | 0.673873  |
| 930     | 929.5   | 0.730341 | -0.41400368  | 0.730887  |
| 222     | 246     | 0.690533 | -0.80573118  | 0.620884  |
| 12.5    | 17.5    | 0.368766 | -2.64385619  | 0.217157  |
| 284     | 325.5   | 0.798924 | -0.421826665 | 0.690636  |
| 8.5     | 16      | 0.108146 | -1.765534746 | 0.0145581 |
| 2237    | 2239.5  | 0.78325  | -0.446111129 | 0.782375  |
| 2144.5  | 2276    | 0.844565 | -0.336804857 | 0.80013   |
| 261     | 293     | 0.950488 | -0.118012913 | 0.873907  |
| 23861.5 | 25424.5 | 0.49344  | -0.79998241  | 0.435643  |
| 7       | 11      | 0.450185 | -0.807354922 | 0.13656   |
| 1724.5  | 1716    | 0.871604 | -0.23085277  | 0.875828  |
| 2212.5  | 2145.5  | 0.746749 | -0.575700362 | 0.768976  |
| 4010    | 4398    | 0.857319 | -0.349854294 | 0.795094  |
| 649     | 745     | 0.804544 | -0.359081093 | 0.682236  |
| 665.5   | 638.5   | 0.853141 | -0.227278317 | 0.893565  |
| 0       | 0       | ?        | #DIV/0!      | ?         |
| 36.5    | 30      | 0.766155 | 0.551642428  | 0.68323   |
| 9.5     | 18      | 0.955161 | 0.144389909  | 0.678186  |
| 5547.5  | 6008.5  | 0.758848 | -0.699318636 | 0.710016  |
| 1777    | 1475.5  | 0.757134 | -0.475555845 | 0.901838  |
| 517     | 561.5   | 0.994576 | -0.01402047  | 0.946366  |
| 246     | 269     | 0.835957 | -0.39176772  | 0.773816  |
| 24.5    | 21.5    | 0.566589 | 0.472752997  | 0.46033   |
| 1186    | 1163.5  | 0.80339  | -0.40131666  | 0.818314  |
| 91      | 77      | 0.861267 | -0.250406798 | 0.995178  |
| 25.5    | 29.5    | 0.962134 | -0.087462841 | 0.862169  |
| 80      | 72.5    | 0.968191 | -0.064540252 | 0.963652  |
| 11.5    | 11.5    | 0.971396 | 0.061400545  | 0.971396  |

|         |         |          |              |           |
|---------|---------|----------|--------------|-----------|
| 6642.5  | 6410    | 0.610511 | 0.803206811  | 0.594685  |
| 15456.7 | 15623.9 | 0.823484 | -0.389078737 | 0.81563   |
| 2213    | 2303.5  | 0.85657  | -0.324701411 | 0.828117  |
| 1796.5  | 1883    | 0.938841 | -0.132373081 | 0.905456  |
| 17.5    | 22      | 0.394325 | -1.669851398 | 0.265889  |
| 279     | 269.5   | 0.686533 | -0.644341048 | 0.714051  |
| 1582.5  | 1318    | 0.48578  | -1.145181828 | 0.62003   |
| 5053.49 | 4966.56 | 0.797232 | -0.405407948 | 0.811035  |
| 41987.5 | 31130.5 | 0.379884 | -0.603802653 | 0.81835   |
| 2185    | 2285.5  | 0.947545 | -0.131244533 | 0.919919  |
| 589     | 524     | 0.756481 | -0.37398734  | 0.871844  |
| 37      | 53.5    | 0.658725 | -1.402098444 | 0.463148  |
| 248     | 280.5   | 0.980993 | -0.038316932 | 0.886547  |
| 1901.97 | 2050.5  | 0.852511 | -0.370697244 | 0.803102  |
| 246.5   | 243     | 0.921261 | -0.15102797  | 0.932464  |
| 1106.99 | 1067.48 | 0.806169 | -0.485815772 | 0.829747  |
| 636     | 458.501 | 0.871969 | -0.237403806 | 0.892319  |
| 801     | 815.5   | 0.979778 | 0.048699455  | 0.990439  |
| 0       | 0.5     | 1        | #DIV/0!      | 0.308068  |
| 89.5001 | 109.5   | 0.805461 | -0.506537466 | 0.669272  |
| 1602.5  | 1752.5  | 0.970944 | -0.070569395 | 0.914203  |
| 4016    | 3789.5  | 0.932807 | -0.142217218 | 0.973134  |
| 208     | 214.5   | 0.782726 | -0.500767373 | 0.760622  |
| 25.5    | 49      | 0.363957 | -1.502500341 | 0.0811944 |
| 0       | 0       | ?        | #DIV/0!      | ?         |
| 5.5     | 6       | 0.532454 | -1.874469118 | 0.486517  |
| 17      | 19      | 0.798271 | -0.387023123 | 0.703593  |
| 6403.15 | 7032.51 | 0.913173 | -0.167938852 | 0.836816  |
| 1111    | 1047    | 0.653543 | -0.549687026 | 0.711173  |
| 536     | 516.5   | 0.789757 | -0.451379346 | 0.817384  |
| 1096.5  | 1096.5  | 0.839027 | -0.328852253 | 0.839027  |
| 1162    | 1059    | 0.768204 | -0.439242959 | 0.844532  |
| 218     | 217     | 0.760726 | -0.450771711 | 0.764627  |
| 513     | 852     | 0.957819 | 0.130327197  | 0.753585  |
| 653.5   | 706     | 0.735091 | -0.702787248 | 0.684113  |
| 281.5   | 291.5   | 0.502877 | -1.927537746 | 0.484245  |
| 1819.5  | 2001    | 0.989822 | -0.019558207 | 0.914674  |
| 0.5     | 0.5     | 1        | 0            | 1         |
| 903.503 | 911.996 | 0.731563 | -0.471757569 | 0.723083  |
| 768.503 | 1001.5  | 0.930382 | -0.174400331 | 0.751121  |
| 6051    | 6795    | 0.771868 | -0.421489314 | 0.669657  |
| 5681    | 6636.5  | 0.76321  | -0.470696942 | 0.633373  |
| 3920.5  | 4249    | 0.871355 | -0.324644559 | 0.819098  |
| 3560.01 | 4045.5  | 0.803894 | -0.44866086  | 0.7097    |
| 8135.5  | 9222    | 0.610983 | -0.600921778 | 0.4883    |
| 5319.81 | 5649.5  | 0.762296 | -0.446698851 | 0.710479  |
| 787     | 818.499 | 0.884086 | -0.249532419 | 0.855329  |
| 3477.4  | 3609.97 | 0.706097 | -0.503179517 | 0.671289  |
| 3624.5  | 3274.5  | 0.766171 | -0.499667091 | 0.841318  |
| 35      | 76.5    | 0.878474 | 0.378511623  | 0.657054  |
| 61.5    | 69      | 0.743142 | -0.533123569 | 0.650702  |
| 247.5   | 236     | 0.796717 | -0.377637527 | 0.836714  |
| 8874    | 9214.5  | 0.525726 | -0.724528142 | 0.489477  |
| 209     | 160     | 0.874163 | -0.211504105 | 0.9092    |
| 27      | 34      | 0.768798 | 0.602664502  | 0.882436  |
| 1824    | 1948.5  | 0.575246 | -0.648634519 | 0.510353  |

|         |         |          |              |          |
|---------|---------|----------|--------------|----------|
| 944.5   | 1025    | 0.828528 | -0.331698725 | 0.760279 |
| 1462.5  | 902     | 0.898218 | 0.15952983   | 0.593832 |
| 370.487 | 371.058 | 0.90532  | -0.178280471 | 0.904073 |
| 3730    | 4287    | 0.553346 | -2.179335075 | 0.485709 |
| 3597.5  | 2719.03 | 0.867936 | -0.278252357 | 0.947899 |
| 9006.5  | 8041    | 0.609604 | -0.606588403 | 0.722047 |
| 50      | 66.5    | 0.987431 | 0.028569152  | 0.808148 |
| 9085.5  | 8439    | 0.387254 | -0.848997636 | 0.458887 |
| 122168  | 107887  | 0.457119 | -0.444191557 | 0.666694 |
| 893.499 | 942.499 | 0.996598 | -0.007289187 | 0.959611 |
| 632.5   | 705     | 0.932798 | -0.161546109 | 0.860942 |
| 947.5   | 1122.5  | 0.973364 | 0.068394024  | 0.925451 |
| 4441    | 5081    | 0.888103 | -0.304692162 | 0.805488 |
| 2602.51 | 2249    | 0.65886  | -0.540371349 | 0.800516 |
| 965.5   | 954.5   | 0.670247 | -0.6205117   | 0.680063 |
| 2356.99 | 2229.98 | 0.67389  | -0.557512831 | 0.724941 |
| 701     | 656.5   | 0.975704 | 0.05650437   | 0.937177 |
| 502     | 593     | 0.657173 | -0.501901737 | 0.485335 |
| 2738    | 3178.5  | 0.864281 | -0.377589815 | 0.772699 |
| 1412    | 1275    | 0.470946 | -0.629053323 | 0.592635 |
| 6050.68 | 6467.98 | 0.850441 | -0.350132905 | 0.803915 |
| 1465.5  | 1348.5  | 0.877895 | -0.301644253 | 0.929273 |
| 4953    | 5344.5  | 0.912335 | -0.228497866 | 0.865609 |
| 3310    | 3330    | 0.905627 | -0.246307571 | 0.902022 |
| 2356.5  | 2530.5  | 0.903264 | -0.240256935 | 0.857358 |
| 1055.5  | 1095    | 0.857546 | -0.309848144 | 0.830564 |
| 4083.5  | 3748    | 0.748301 | -0.442201208 | 0.824197 |
| 2124    | 2117    | 0.720262 | -0.500379291 | 0.723207 |
| 1034.5  | 993.5   | 0.549753 | -0.669312683 | 0.590699 |
| 2222.5  | 2277    | 0.399951 | -0.656999941 | 0.373131 |
| 1816.5  | 1549    | 0.221174 | -0.987741862 | 0.358235 |
| 1313.01 | 1244.49 | 0.692014 | -0.561803284 | 0.738758 |
| 3298    | 3555    | 0.924174 | -0.16626604  | 0.870486 |
| 5443.5  | 5487.5  | 0.76332  | -0.468904371 | 0.756759 |
| 123     | 132     | 0.880558 | -0.270089163 | 0.830404 |
| 1722.5  | 1678.5  | 0.564404 | -0.60818121  | 0.592066 |
| 1143    | 1190.5  | 0.549266 | -0.717740521 | 0.510784 |
| 650.5   | 570     | 0.700795 | -0.302377963 | 0.893068 |
| 1631.5  | 1499    | 0.751665 | -0.420500861 | 0.829066 |
| 906.5   | 868.5   | 0.676604 | -0.463316126 | 0.722533 |
| 1340.7  | 1147.03 | 0.64513  | -0.590075378 | 0.790289 |
| 550     | 461.5   | 0.674918 | -0.527748562 | 0.840136 |
| 723.5   | 616     | 0.643257 | -0.416700165 | 0.847685 |
| 1673    | 1516.5  | 0.669028 | -0.429772272 | 0.783264 |
| 1173    | 1178.5  | 0.98126  | -0.043068722 | 0.978274 |
| 5       | 5.5     | 0.398521 | -0.514573173 | 0.281682 |
| 1427.5  | 1245.5  | 0.384042 | -0.672725408 | 0.551339 |
| 407     | 363     | 0.882445 | -0.276567561 | 0.955077 |
| 399     | 408     | 0.84143  | -0.385216366 | 0.826529 |
| 578     | 735     | 0.787591 | 0.551292477  | 0.910169 |
| 1185    | 1082    | 0.90238  | 0.198189092  | 0.845683 |
| 648.5   | 703.5   | 0.757878 | -0.61304231  | 0.702515 |
| 161.5   | 142     | 0.868923 | -0.318582067 | 0.948488 |
| 160     | 162.5   | 0.840163 | -0.299560282 | 0.827158 |
| 102.037 | 260.5   | 0.923413 | -0.313984479 | 0.41933  |
| 694     | 759.5   | 0.767194 | -0.437383658 | 0.689083 |

|         |         |          |              |          |
|---------|---------|----------|--------------|----------|
| 2617    | 2770    | 0.766486 | -0.446807613 | 0.718313 |
| 65.5    | 78.5    | 0.883635 | -0.213244039 | 0.723162 |
| 257     | 643.999 | 0.642377 | -1.796171184 | 0.207331 |
| 8.5     | 5       | 0.506949 | -0.91753784  | 0.931084 |
| 15.5    | 12      | 0.511926 | 0.878693704  | 0.415816 |
| 0.5     | 0       | 1        | 0            | 0.450185 |
| 726.001 | 582.498 | 0.977396 | 0.042107834  | 0.828614 |
| 1235.5  | 1376.5  | 0.718937 | -0.670037181 | 0.640881 |
| 4478    | 5169    | 0.827458 | -0.366049147 | 0.715078 |
| 269     | 272.5   | 0.865525 | -0.204183623 | 0.852494 |
| 364.5   | 806.5   | 0.811712 | -0.855138976 | 0.405773 |
| 1444.5  | 1437.5  | 0.816251 | -0.344069646 | 0.820334 |
| 123.5   | 118.5   | 0.610675 | -0.672242826 | 0.648377 |
| 3212.5  | 2936    | 0.674831 | -0.54520961  | 0.758703 |
| 1715.5  | 1762.5  | 0.315706 | -1.004632801 | 0.294485 |
| 5391    | 5137    | 0.486044 | -0.880391015 | 0.528594 |
| 575.5   | 532     | 0.648093 | -0.58183233  | 0.722399 |
| 1197.5  | 1065.5  | 0.468563 | -0.650270694 | 0.604862 |
| 5       | 10.5    | 0.870052 | 0.378511623  | 0.667409 |
| 913     | 853.5   | 0.736309 | -0.527270241 | 0.790131 |
| 1454    | 1455.5  | 0.878004 | -0.239610641 | 0.877191 |
| 157     | 147.5   | 0.986556 | 0.022791865  | 0.935575 |
| 950.5   | 902.5   | 0.8065   | -0.301955767 | 0.857218 |
| 396     | 413.5   | 0.769956 | -0.472009685 | 0.735499 |
| 273.5   | 297.5   | 0.898786 | -0.179517644 | 0.824399 |
| 549.5   | 466     | 0.594422 | -0.472619051 | 0.804105 |
| 256     | 251     | 0.760423 | -0.524266569 | 0.775116 |
| 561     | 467.5   | 0.674658 | -0.414180538 | 0.887459 |
| 552.501 | 533.999 | 0.811139 | -0.317039718 | 0.842474 |
| 474     | 525     | 0.772861 | -0.283263731 | 0.647463 |
| 853     | 781.5   | 0.751139 | -0.41672981  | 0.831872 |
| 154     | 161.5   | 0.912246 | -0.158262084 | 0.871581 |
| 968.483 | 850.513 | 0.695426 | -0.401651779 | 0.843509 |
| 553     | 485.5   | 0.885968 | -0.208760556 | 0.989228 |
| 345.255 | 342.811 | 0.728593 | -0.315860955 | 0.737797 |
| 68      | 72.5    | 0.946947 | 0.112209504  | 0.990343 |
| 2121    | 1956    | 0.939478 | -0.113890967 | 0.998494 |
| 4985.5  | 4387.5  | 0.76415  | -0.552203455 | 0.850994 |
| 5550.5  | 5830.5  | 0.685851 | -0.504158293 | 0.637618 |
| 2041    | 1932.5  | 0.617022 | -0.775347408 | 0.660977 |
| 1324.5  | 1034.5  | 0.202608 | -0.886409234 | 0.457792 |
| 5437.5  | 5780    | 0.824841 | -0.386013207 | 0.779539 |
| 81.5    | 77.5    | 0.755291 | 0.48416186   | 0.726939 |
| 37.5    | 43.5    | 0.427749 | -1.64385619  | 0.340639 |
| 634     | 579     | 0.710197 | -0.558469603 | 0.784993 |
| 1160.5  | 1333.5  | 0.697501 | -0.586206203 | 0.579675 |
| 325.001 | 359.499 | 0.965647 | -0.079857747 | 0.898313 |
| 2668.53 | 2575.98 | 0.78602  | -0.514960163 | 0.809957 |
| 1995.5  | 2137    | 0.826965 | -0.422406525 | 0.780348 |
| 10      | 12.5    | 0.910295 | 0.263034406  | 0.977504 |
| 1782    | 1726.5  | 0.754126 | -0.441718621 | 0.781944 |
| 1107    | 992     | 0.793073 | -0.379424185 | 0.884599 |
| 956     | 1015.5  | 0.90382  | -0.216118188 | 0.861369 |
| 757     | 756     | 0.853785 | -0.205498289 | 0.855215 |
| 2459.5  | 2471.5  | 0.649443 | -0.584229461 | 0.644845 |
| 6       | 7.5     | 0.791975 | -0.584962501 | 0.648754 |

|         |         |           |              |          |
|---------|---------|-----------|--------------|----------|
| 527.5   | 641     | 0.878748  | -0.274842959 | 0.734746 |
| 1813.5  | 1776.14 | 0.648174  | -0.515141521 | 0.670043 |
| 1431    | 1295.5  | 0.7367    | -0.638886905 | 0.803778 |
| 171     | 121.5   | 0.765431  | -0.481214576 | 0.995049 |
| 230.5   | 288     | 0.948533  | -0.130946517 | 0.80355  |
| 536.5   | 561.5   | 0.866068  | -0.264917996 | 0.82966  |
| 949     | 1024    | 0.934907  | -0.172587854 | 0.889646 |
| 2778    | 2601    | 0.780158  | -0.540473961 | 0.823693 |
| 394.5   | 234.5   | 0.880624  | -0.244503123 | 0.81054  |
| 5974    | 4613    | 0.68628   | -0.656309073 | 0.877461 |
| 293.5   | 225     | 0.647266  | -0.619787865 | 0.877217 |
| 995     | 1424.5  | 0.990928  | 0.026577658  | 0.801738 |
| 7071.09 | 4668.1  | 0.435265  | -1.750156226 | 0.67434  |
| 7152.32 | 7119.64 | 0.892907  | -0.24089918  | 0.89606  |
| 385     | 432.5   | 0.690691  | -0.850622376 | 0.614615 |
| 601     | 633     | 0.791767  | -0.208853368 | 0.714319 |
| 68.5    | 49      | 0.711954  | -0.120752159 | 0.377381 |
| 5316.25 | 5352.58 | 0.664968  | -0.58893138  | 0.658794 |
| 1200.5  | 1177    | 0.833087  | -0.258594787 | 0.852618 |
| 9.5     | 12      | 0.521173  | 0.961525852  | 0.637009 |
| 3365.3  | 3559.83 | 0.472875  | -0.660254264 | 0.41319  |
| 2546.5  | 2649.5  | 0.877999  | -0.307623287 | 0.852722 |
| 6303    | 7739.5  | 0.881268  | -0.29539346  | 0.74105  |
| 1790.99 | 1848.99 | 0.879474  | -0.261104038 | 0.856264 |
| 338     | 333.5   | 0.913617  | -0.172060746 | 0.923793 |
| 57.5    | 63.5    | 0.848471  | 0.334419039  | 0.908527 |
| 910.5   | 1193    | 0.955671  | 0.121497958  | 0.88828  |
| 5.5     | 4       | 0.943913  | 0.125530882  | 0.779894 |
| 4891.46 | 4276.5  | 0.7434    | -0.559755607 | 0.840968 |
| 616     | 589     | 0.810313  | -0.413476985 | 0.842928 |
| 2010.82 | 2078.1  | 0.592271  | -0.616852173 | 0.559233 |
| 2027.05 | 2562.94 | 0.916906  | -0.215749584 | 0.763705 |
| 2305.5  | 3029.98 | 0.30486   | -0.991576846 | 0.137301 |
| 810     | 826     | 0.915505  | -0.188072348 | 0.90195  |
| 977.5   | 903     | 0.850345  | -0.334900392 | 0.904875 |
| 285.85  | 297.68  | 0.909256  | -0.186783694 | 0.878661 |
| 19439   | 20064.4 | 0.482664  | -0.450352949 | 0.436759 |
| 147.416 | 159.67  | 0.828705  | -0.344264217 | 0.764299 |
| 126     | 149.5   | 0.896013  | 0.280107919  | 0.986461 |
| 1247.79 | 1311.54 | 0.89873   | -0.208036632 | 0.860735 |
| 2416    | 1694.5  | 0.0929769 | -1.079795051 | 0.369042 |
| 741.002 | 702.002 | 0.793636  | -0.486201532 | 0.830601 |
| 1135    | 1077.5  | 0.852406  | -0.28197037  | 0.894057 |
| 1705.5  | 1667    | 0.85296   | -0.271943887 | 0.872001 |
| 153.5   | 208.5   | 0.992807  | 0.018675925  | 0.812176 |
| 469     | 488     | 0.697058  | -0.500579052 | 0.659029 |
| 873.005 | 796.993 | 0.543027  | -0.637984003 | 0.640593 |
| 909.002 | 1002.5  | 0.910899  | -0.211590815 | 0.844767 |
| 311     | 320     | 0.915446  | -0.156649458 | 0.891869 |
| 541.5   | 698.997 | 0.983304  | -0.040525066 | 0.810824 |
| 25      | 13.5    | 0.0869754 | -0.888968688 | 1        |
| 2653.5  | 2997.5  | 0.714491  | -0.433367236 | 0.588972 |
| 940.5   | 963     | 0.831166  | -0.362570079 | 0.813488 |
| 2377.5  | 2454.5  | 0.769885  | -0.563729405 | 0.748003 |
| 681     | 810     | 0.980143  | -0.052859787 | 0.876353 |
| 1244.5  | 1429    | 0.895349  | -0.240375916 | 0.796873 |

|         |         |           |              |          |
|---------|---------|-----------|--------------|----------|
| 120.5   | 102.5   | 0.688826  | -0.684070646 | 0.806942 |
| 761     | 556.5   | 0.758293  | -0.405589561 | 0.976094 |
| 5763    | 5667.5  | 0.822344  | -0.346672159 | 0.835807 |
| 1197    | 1106.5  | 0.807821  | -0.331147591 | 0.877537 |
| 1020.5  | 953.5   | 0.782383  | -0.398870711 | 0.840055 |
| 49      | 51.5    | 0.913173  | 0.179706022  | 0.946465 |
| 1       | 1       | 0.308068  | #NUM!        | 0.308068 |
| 0.5     | 4       | 0.794363  | 1.584962501  | 0.527911 |
| 1242.5  | 1307.5  | 0.820091  | -0.420272037 | 0.784163 |
| 1117.5  | 999.495 | 0.693986  | -0.575310407 | 0.787757 |
| 186.735 | 191.983 | 0.914645  | -0.15402612  | 0.891158 |
| 8056    | 7445    | 0.530177  | -0.657870146 | 0.613916 |
| 614.5   | 592.5   | 0.785793  | -0.452697566 | 0.813387 |
| 1269.5  | 1346.5  | 0.872941  | -0.303718601 | 0.833166 |
| 8       | 3       | 0.0022595 | #NUM!        | 0.034897 |
| 4.5     | 2       | 0.589032  | -0.847996907 | 0.889735 |
| 1174    | 1089.5  | 0.875759  | -0.331483422 | 0.919023 |
| 6097    | 6779.5  | 0.990371  | -0.025784414 | 0.929658 |
| 8969.5  | 8394.5  | 0.990844  | -0.021144406 | 0.968825 |
| 1646.5  | 1954.5  | 0.887025  | -0.304184687 | 0.779244 |
| 1425    | 1419    | 0.884573  | -0.261213204 | 0.887476 |
| 558.5   | 726     | 0.908075  | 0.212208432  | 0.917884 |
| 4252.45 | 4446.91 | 0.86346   | -0.330208604 | 0.833575 |
| 1162.5  | 938.5   | 0.799176  | -0.44661307  | 0.94365  |
| 0       | 0.5     | 1         | #DIV/0!      | 0.308068 |
| 3       | 5       | 0.844837  | -0.584962501 | 0.567924 |
| 3681    | 3751    | 0.625008  | -0.61916881  | 0.607156 |
| 2430.5  | 2534.5  | 0.856078  | -0.266540783 | 0.820446 |
| 974     | 1312.5  | 0.853909  | -0.452044531 | 0.677092 |
| 91      | 63.5    | 0.933788  | -0.132755209 | 0.840029 |
| 203.5   | 205.5   | 0.952157  | -0.095237797 | 0.944814 |
| 198.5   | 205.5   | 0.769492  | -0.488336954 | 0.742656 |
| 175.5   | 166     | 0.819491  | -0.38923803  | 0.860047 |
| 2689.5  | 2759    | 0.893482  | -0.226017791 | 0.874727 |
| 6319.5  | 7348    | 0.563368  | -1.001484666 | 0.453872 |
| 3839.5  | 5056.5  | 0.518061  | -1.279168848 | 0.342828 |
| 71      | 201     | 0.916359  | 0.293196376  | 0.475731 |
| 155     | 169.5   | 0.470529  | -2.126377286 | 0.423836 |
| 388     | 386     | 0.74865   | -0.486170676 | 0.752948 |
| 4       | 2       | 0.411079  | -3           | 0.710482 |
| 1368.82 | 1006.22 | 0.980295  | 0.03321525   | 0.761923 |
| 4       | 4.5     | 0.749249  | -0.678071905 | 0.672262 |
| 7524.5  | 8052    | 0.605325  | -0.814996511 | 0.55143  |
| 976.49  | 1036.5  | 0.96131   | -0.095409526 | 0.924289 |
| 1523.5  | 1830    | 0.588778  | -1.008071706 | 0.460212 |
| 3096    | 3885    | 0.929407  | 0.140634943  | 0.895152 |
| 26.5    | 33.5    | 0.91594   | -0.236067358 | 0.773137 |
| 1089    | 1174.5  | 0.861883  | -0.325575872 | 0.809591 |
| 6.5     | 7.5     | 0.24511   | #NUM!        | 0.19485  |
| 130.5   | 273.5   | 0.699637  | -1.195015982 | 0.299563 |
| 0.5     | 0       | 0.308068  | #NUM!        | 1        |
| 0.5     | 0       | 0.308068  | #NUM!        | 1        |
| 38      | 42.5    | 0.375484  | -2.078002512 | 0.316476 |
| 76      | 131.5   | 0.744507  | -0.890375509 | 0.423662 |
| 156.5   | 220     | 0.731781  | -0.80620307  | 0.516748 |
| 3446.5  | 3608.5  | 0.769434  | -0.451135897 | 0.73132  |

|         |         |          |              |          |
|---------|---------|----------|--------------|----------|
| 443     | 483     | 0.846778 | -0.360710337 | 0.786266 |
| 1241.5  | 1183    | 0.772471 | -0.348608658 | 0.820911 |
| 740     | 538.5   | 0.689759 | -0.384176536 | 0.946787 |
| 1179.5  | 1107    | 0.619685 | -0.819175953 | 0.668315 |
| 2       | 4.55982 | 0.824412 | -0.976616887 | 0.447568 |
| 763.5   | 652.5   | 0.575754 | -0.619382305 | 0.739179 |
| 24.5    | 43      | 1        | 0            | 0.689641 |
| 271.5   | 395     | 0.337099 | -1.119024103 | 0.126465 |
| 2211.63 | 2128.8  | 0.74273  | -0.509940744 | 0.773621 |
| 408.5   | 419     | 0.891684 | -0.264801332 | 0.87528  |
| 26.5    | 38      | 0.961948 | 0.10496956   | 0.821533 |
| 797.499 | 847.499 | 0.991102 | -0.02003411  | 0.950696 |
| 436     | 411.5   | 0.663611 | -0.459845295 | 0.728096 |
| 812.5   | 883     | 0.506079 | -0.551180353 | 0.408331 |
| 161     | 136     | 0.778608 | -0.424026283 | 0.912084 |
| 9.5     | 8       | 0.923682 | -0.160464672 | 0.961772 |
| 1313.49 | 1290.99 | 0.770829 | -0.481138589 | 0.784122 |
| 2236.99 | 2347.5  | 0.94865  | -0.121732577 | 0.917443 |
| 2787.99 | 2817    | 0.852725 | -0.318950555 | 0.845147 |
| 1408    | 1518    | 0.92605  | -0.172296433 | 0.875253 |
| 3442.14 | 2998.07 | 0.72528  | -0.436507699 | 0.857684 |
| 18      | 15      | 0.845931 | 0.187627003  | 0.673177 |
| 42.5    | 43.5    | 0.815593 | -0.300866479 | 0.793312 |
| 4307.5  | 4435    | 0.566332 | -0.574533837 | 0.534172 |
| 276     | 224     | 0.996612 | -0.002615948 | 0.667419 |
| 4.5     | 5       | 0.21517  | -1.584962501 | 0.165029 |
| 1532    | 1321    | 0.745371 | -0.403158253 | 0.88673  |
| 364.5   | 374     | 0.974348 | -0.054447784 | 0.956318 |
| 401.5   | 463     | 0.665157 | -0.657734331 | 0.546191 |
| 13.5    | 104.5   | 0.653906 | 2.199311135  | 0.693147 |
| 3321.5  | 3253    | 0.521105 | -1.027405562 | 0.536911 |
| 2532    | 2805    | 0.928933 | -0.168109955 | 0.860118 |
| 430.5   | 364     | 0.64977  | -0.516249751 | 0.822579 |
| 759     | 672     | 0.767361 | -0.399283957 | 0.875631 |
| 751.5   | 694.5   | 0.837945 | -0.303330876 | 0.902086 |
| 876     | 863.5   | 0.830806 | -0.356934545 | 0.841586 |
| 462.5   | 531.5   | 0.843458 | -0.375551289 | 0.745963 |
| 104     | 92.9999 | 0.685147 | -0.667016717 | 0.770429 |
| 29.5    | 26      | 0.840466 | -0.328054198 | 0.932944 |
| 3116.5  | 3035    | 0.717937 | -0.568164043 | 0.739265 |
| 1445    | 1043    | 0.739687 | -0.381159825 | 0.946957 |
| 452.5   | 434.5   | 0.580725 | -1.138779398 | 0.607184 |
| 156.5   | 127     | 0.830043 | 0.37531707   | 0.727611 |
| 543     | 619.5   | 0.939685 | -0.142293882 | 0.850384 |
| 742.5   | 711     | 0.86361  | 0.291095489  | 0.838244 |
| 647.5   | 715     | 0.80929  | -0.456093333 | 0.739512 |
| 650     | 662     | 0.890345 | -0.248898885 | 0.877719 |
| 644.5   | 728.5   | 0.905525 | -0.232688738 | 0.824477 |
| 1429.5  | 1360.5  | 0.723481 | -0.513348199 | 0.765849 |
| 8515.5  | 8235.5  | 0.729119 | -0.645291678 | 0.752502 |
| 1579.3  | 1342.23 | 0.544729 | -0.64746046  | 0.717065 |
| 793.5   | 923.5   | 0.872491 | -0.310158318 | 0.768225 |
| 946.5   | 892.005 | 0.806262 | 0.349567459  | 0.767249 |
| 1642.51 | 1457.02 | 0.882159 | 0.19141157   | 0.791008 |
| 279.965 | 286.17  | 0.309737 | -1.20304393  | 0.294438 |
| 30.5    | 23.5    | 0.323758 | -1.682809824 | 0.489593 |



|         |         |          |              |          |
|---------|---------|----------|--------------|----------|
| 388     | 425     | 0.797032 | -0.371094152 | 0.716575 |
| 6032.5  | 7435    | 0.994677 | -0.012369293 | 0.851102 |
| 1152.5  | 1176.98 | 0.883519 | -0.222921402 | 0.866469 |
| 210     | 170.5   | 0.81154  | -0.330541225 | 0.984432 |
| 404     | 389.5   | 0.651144 | -0.565454342 | 0.686411 |
| 2132    | 1452.5  | 0.207714 | -0.915246446 | 0.642273 |
| 1183    | 1058.5  | 0.530598 | -0.736559144 | 0.63849  |
| 3769.5  | 3484.5  | 0.484701 | -0.642648708 | 0.574681 |
| 6297.5  | 5948.5  | 0.168467 | -0.831641298 | 0.212548 |
| 954     | 902.499 | 0.771625 | -0.353858602 | 0.826674 |
| 1390    | 1340    | 0.586514 | -0.543023712 | 0.62812  |
| 1517    | 1441.5  | 0.386245 | -0.747624579 | 0.440374 |
| 2642    | 2505.5  | 0.450655 | -0.643753807 | 0.512494 |
| 4619    | 5083.5  | 0.333769 | -0.661859235 | 0.239567 |
| 1979    | 1596    | 0.283967 | -0.956909837 | 0.491215 |
| 1218.39 | 1014.86 | 0.571613 | -0.720839811 | 0.739874 |
| 4925    | 5483    | 0.221698 | -0.742346053 | 0.143308 |
| 4278    | 3582.5  | 0.147239 | -0.849616548 | 0.305244 |
| 865.5   | 805.5   | 0.617009 | -0.596258126 | 0.688336 |
| 704     | 805.5   | 0.820904 | -0.310955036 | 0.695871 |
| 2397    | 2232.52 | 0.452682 | -0.724679613 | 0.528298 |
| 1708    | 1895.5  | 0.388219 | -0.638087035 | 0.279712 |
| 1963.5  | 1739.5  | 0.211621 | -0.831994807 | 0.326224 |
| 4055.11 | 4117.08 | 0.216835 | -0.846920742 | 0.205163 |
| 2105    | 2336    | 0.711669 | -0.630744082 | 0.631363 |
| 949     | 850     | 0.508926 | -0.673518419 | 0.627572 |
| 948     | 803.5   | 0.463812 | -0.764621937 | 0.634581 |
| 535.5   | 478.5   | 0.486409 | -0.665999073 | 0.612338 |
| 978     | 974     | 0.425212 | -0.767527572 | 0.429308 |
| 1495.51 | 1417.98 | 0.788601 | -0.385302559 | 0.834148 |
| 2108.5  | 1980    | 0.592501 | -0.624148791 | 0.655536 |
| 723     | 733     | 0.649604 | -0.539299122 | 0.635756 |
| 1496.5  | 1365.5  | 0.524193 | -0.619598601 | 0.627571 |
| 1190    | 1100    | 0.675506 | -0.466876431 | 0.759246 |
| 3023.5  | 2924    | 0.558736 | -0.577229404 | 0.596453 |
| 1310    | 1224    | 0.593128 | -0.685580208 | 0.656102 |
| 1251    | 1034.5  | 0.416949 | -0.733318303 | 0.632059 |
| 392.23  | 325.058 | 0.388905 | -0.974906229 | 0.55939  |
| 1569.5  | 1318    | 0.572137 | -0.559451598 | 0.771988 |
| 1238    | 1031    | 0.355376 | -0.598720679 | 0.618496 |
| 2595.5  | 2358.5  | 0.235568 | -0.910299168 | 0.319375 |
| 823.5   | 705.5   | 0.438431 | -0.682809824 | 0.619057 |
| 697     | 555     | 0.646147 | -0.533622858 | 0.873357 |
| 2709    | 2571    | 0.430756 | -0.634946796 | 0.493187 |
| 1648    | 2124.5  | 0.410408 | -0.67667191  | 0.189418 |
| 3038    | 2479.5  | 0.186915 | -0.863273767 | 0.387555 |
| 1460    | 1605.5  | 0.305268 | -0.969688111 | 0.234334 |
| 1982    | 1767.5  | 0.750113 | -0.433104994 | 0.851846 |
| 1385    | 1285    | 0.670882 | -0.478568219 | 0.749982 |
| 608     | 542     | 0.456382 | -0.811215971 | 0.56903  |
| 2840    | 4027.5  | 0.319652 | -0.755284425 | 0.094953 |
| 1001    | 890.5   | 0.568701 | -0.655477944 | 0.686286 |
| 1649.5  | 1490.5  | 0.554526 | -0.483853359 | 0.690395 |
| 1421.5  | 1288.5  | 0.542233 | -0.65621476  | 0.645189 |
| 2390.85 | 2656.62 | 0.464714 | -0.860564073 | 0.373869 |
| 1086    | 851     | 0.561323 | -0.708682999 | 0.791988 |

|         |         |          |              |          |
|---------|---------|----------|--------------|----------|
| 1360    | 1105    | 0.20991  | -0.89566334  | 0.414022 |
| 1216.5  | 1157    | 0.545419 | -0.702590836 | 0.594615 |
| 177.5   | 213.5   | 0.849372 | -0.352734142 | 0.715759 |
| 1578.5  | 1246.5  | 0.658621 | -0.500863747 | 0.898808 |
| 1677.5  | 1640.5  | 0.461936 | -0.771049445 | 0.483945 |
| 828     | 798.5   | 0.608329 | -0.548828715 | 0.647586 |
| 421     | 306.5   | 0.384167 | -0.949492098 | 0.687616 |
| 1238    | 1188    | 0.731207 | -0.446452895 | 0.770055 |
| 618     | 515     | 0.866162 | -0.221614478 | 0.977022 |
| 2292.5  | 2324.5  | 0.798289 | -0.404899346 | 0.787203 |
| 1364    | 1227.5  | 0.619429 | -0.567354018 | 0.72786  |
| 1153    | 1044    | 0.745416 | -0.439009372 | 0.834508 |
| 264.5   | 287.5   | 0.886941 | -0.249462386 | 0.826301 |
| 2229.92 | 2160    | 0.503191 | -0.50999987  | 0.545933 |
| 103     | 160.5   | 0.828391 | 0.493408563  | 0.935994 |
| 2107    | 1032.5  | 0.350542 | -1.322441723 | 0.878899 |
| 2       | 0       | 0.308068 | 0.584962501  | 0.034897 |
| 3461.53 | 4400.25 | 0.820043 | -0.417049168 | 0.641361 |
| 747.5   | 775     | 0.993242 | -0.016499215 | 0.971386 |
| 3643    | 4073.07 | 0.777969 | -0.453971958 | 0.687617 |
| 5332.08 | 5607.69 | 0.847654 | -0.304365253 | 0.807388 |
| 2408.5  | 2364.5  | 0.761523 | -0.491609773 | 0.775963 |
| 2740.5  | 2287.5  | 0.744898 | -0.51446037  | 0.882942 |
| 573.5   | 641     | 0.886037 | -0.287132729 | 0.813434 |
| 1135.5  | 1223.5  | 0.791186 | -0.458240981 | 0.734816 |
| 53      | 77      | 0.926453 | -0.204358499 | 0.687072 |
| 0       | 0       | ?        | #DIV/0!      | ?        |
| 0       | 0       | ?        | #DIV/0!      | ?        |
| 109     | 125     | 0.696966 | -0.659659868 | 0.590577 |
| 221.5   | 209     | 0.874263 | -0.206200388 | 0.927224 |
| 1249    | 1036.5  | 0.69484  | -0.44264142  | 0.887493 |
| 27      | 19.5    | 0.750137 | -0.328622747 | 0.907037 |
| 2761.54 | 2873.5  | 0.977609 | 0.044982597  | 0.993727 |
| 39.9229 | 41.1887 | 0.763046 | 0.48782124   | 0.780948 |
| 856.5   | 848     | 0.726494 | -0.540185612 | 0.73467  |
| 389.04  | 580.208 | 0.212386 | 3.281387821  | 0.232915 |
| 7.56145 | 24.1681 | 0.531141 | 1.490130452  | 0.889536 |
| 3075.53 | 3370.84 | 0.932772 | -0.156663447 | 0.870697 |
| 1142    | 1293.5  | 0.97564  | -0.043604769 | 0.868019 |
| 778.5   | 776     | 0.972158 | -0.037547859 | 0.975636 |
| 326     | 366     | 0.92987  | -0.158903595 | 0.848506 |
| 644.5   | 595.5   | 0.788785 | -0.401299211 | 0.853484 |
| 3436.5  | 3152    | 0.299021 | -0.78527455  | 0.388625 |
| 2206.46 | 2213.52 | 0.875349 | -0.272225374 | 0.873059 |
| 1124    | 1056.5  | 0.663298 | -0.59042787  | 0.719154 |
| 36      | 29.5    | 0.879168 | 0.187627003  | 0.729017 |
| 330.5   | 387     | 0.975125 | -0.064725713 | 0.878906 |
| 2939.5  | 3163    | 0.803297 | -0.42595804  | 0.747544 |
| 518     | 464.5   | 0.62671  | -0.676958285 | 0.72186  |
| 331.5   | 286     | 0.133367 | -1.019718235 | 0.232669 |
| 3212.03 | 3602.94 | 0.824967 | -0.325359214 | 0.724879 |
| 1841    | 1992.5  | 0.870124 | -0.276418303 | 0.810361 |
| 756.5   | 788     | 0.642664 | -1.053421268 | 0.617353 |
| 961.996 | 963.998 | 0.53789  | -0.575620505 | 0.535498 |
| 172.5   | 135.5   | 0.621234 | -0.67556505  | 0.829999 |
| 1681    | 1562.5  | 0.764936 | -0.451834809 | 0.824728 |

|         |         |           |               |          |
|---------|---------|-----------|---------------|----------|
| 452     | 461     | 0.863308  | -0.244639716  | 0.846179 |
| 423     | 413     | 0.651501  | -0.554588852  | 0.674957 |
| 1324.5  | 1354.5  | 0.83165   | -0.337120982  | 0.81385  |
| 295.5   | 312.5   | 0.820186  | -0.270376381  | 0.762143 |
| 449.5   | 477.5   | 0.880293  | -0.248027816  | 0.834008 |
| 1724    | 1817.5  | 0.924341  | -0.170343477  | 0.887816 |
| 1093.5  | 1280.5  | 0.919187  | -0.213623544  | 0.82071  |
| 194     | 229.5   | 0.89993   | -0.251184688  | 0.78846  |
| 1424    | 1461.5  | 0.69458   | -0.536154217  | 0.670921 |
| 2307.5  | 2264.5  | 0.744921  | -0.530966335  | 0.759597 |
| 4377.25 | 4673.2  | 0.899296  | -0.243267855  | 0.856053 |
| 5664.5  | 5621.5  | 0.852487  | -0.326583703  | 0.857921 |
| 834.5   | 866.5   | 0.846205  | -0.33953939   | 0.818788 |
| 402.224 | 364.7   | 0.668558  | -0.835434847  | 0.73425  |
| 2605    | 2838    | 0.851728  | -0.3744446795 | 0.795444 |
| 4018.5  | 4315.5  | 0.845928  | -0.379283708  | 0.798134 |
| 302     | 277.5   | 0.695962  | -0.386655698  | 0.796369 |
| 15      | 11.5    | 0.583413  | 0.9510904     | 0.499517 |
| 36.5    | 38      | 0.959154  | -0.102361718  | 0.934716 |
| 2316.97 | 2243.9  | 0.788536  | -0.434476704  | 0.813393 |
| 3626.5  | 3899.5  | 0.842907  | -0.399408562  | 0.7955   |
| 1314.5  | 1440.5  | 0.757343  | -0.573212102  | 0.69142  |
| 5787    | 6358.5  | 0.835726  | -0.358089656  | 0.764788 |
| 877.168 | 921.869 | 0.993464  | 0.015366717   | 0.975435 |
| 838.5   | 746     | 0.757857  | -0.351917413  | 0.879017 |
| 571.5   | 538     | 0.812796  | -0.294423544  | 0.871241 |
| 711.5   | 766     | 0.888068  | -0.24110027   | 0.833424 |
| 997     | 885.001 | 0.734626  | -0.633903787  | 0.815584 |
| 953     | 784.5   | 0.656461  | -0.750400258  | 0.79941  |
| 6       | 9       | 0.881442  | 0.321928095   | 0.881442 |
| 623.622 | 566.628 | 0.81847   | -0.36571247   | 0.891601 |
| 532.5   | 837     | 0.824303  | -0.568797681  | 0.552477 |
| 660.998 | 567.002 | 0.537689  | -1.495057984  | 0.626148 |
| 1966    | 1757    | 0.622158  | -0.631002927  | 0.727122 |
| 564.501 | 529     | 0.81417   | -0.356197481  | 0.866649 |
| 129.5   | 124.5   | 0.973834  | -0.056806356  | 1        |
| 0       | 9       | 0.943913  | #DIV/0!       | 0.284842 |
| 21.8325 | 24.3053 | 0.697767  | -0.677766647  | 0.616495 |
| 34.5    | 27      | 0.163997  | -1.649092838  | 0.300325 |
| 27      | 52.5    | 0.760408  | -1            | 0.405856 |
| 1.5     | 0.5     | 0.0805096 | #NUM!         | 0.450185 |
| 0       | 0       | ?         | #DIV/0!       | ?        |
| 1540    | 1541.5  | 0.574279  | -0.732289107  | 0.573396 |
| 718     | 688     | 0.707912  | -0.423097269  | 0.753276 |
| 1647.5  | 1632.5  | 0.864381  | -0.271906071  | 0.871469 |
| 621.5   | 450     | 0.414838  | -1.568804147  | 0.620005 |
| 16      | 24.5    | 0.903368  | -0.299560282  | 0.64779  |
| 15      | 15.5    | 0.256796  | -1.321928095  | 0.236749 |
| 1426.5  | 1399    | 0.805824  | -0.369739575  | 0.821928 |
| 1087.5  | 1150.5  | 0.808487  | -0.382896112  | 0.762893 |
| 691.504 | 740.494 | 0.708402  | -0.507303723  | 0.645381 |
| 2774.97 | 3150.3  | 0.299464  | -0.786720362  | 0.196667 |
| 2444.46 | 2669.52 | 0.927318  | -0.131172307  | 0.851366 |
| 3.5     | 8       | 0.643345  | 1.280107919   | 0.962312 |
| 1804.49 | 1807.5  | 0.83243   | -0.3754791    | 0.831238 |
| 1075    | 1085.5  | 0.928379  | 0.138723046   | 0.935285 |

|         |         |           |              |           |
|---------|---------|-----------|--------------|-----------|
| 1396    | 1124    | 0.823755  | -0.310732885 | 0.999012  |
| 3393.5  | 3771.5  | 0.896001  | 0.270913275  | 0.951912  |
| 515.5   | 462.5   | 0.447275  | -0.901304161 | 0.545714  |
| 1031    | 890.506 | 0.979985  | -0.036848831 | 0.912146  |
| 463.5   | 469.5   | 0.569261  | -0.6940342   | 0.557042  |
| 44.5    | 43.5    | 0.751956  | -0.453365618 | 0.771695  |
| 119.5   | 161.5   | 0.997211  | -0.006049045 | 0.768283  |
| 2393    | 2468    | 0.775186  | -0.485245974 | 0.751718  |
| 134     | 138     | 0.918628  | -0.195724471 | 0.899626  |
| 3574.41 | 3442.4  | 0.720757  | -0.592172956 | 0.749707  |
| 6       | 6.5     | 0.553099  | -2           | 0.513004  |
| 0.5     | 2       | 1         | 0            | 0.450185  |
| 59      | 73.5    | 0.915797  | -0.114458725 | 0.660851  |
| 1641    | 1335.5  | 0.572773  | -0.741710574 | 0.757074  |
| 325     | 252     | 0.682643  | -0.498805857 | 0.923422  |
| 8019    | 7801    | 0.808645  | -0.514393274 | 0.825533  |
| 574.5   | 407     | 0.941739  | -0.113595032 | 0.835553  |
| 1484    | 1431    | 0.900379  | -0.14510642  | 0.937406  |
| 552.001 | 679.5   | 0.761651  | -0.559189043 | 0.608054  |
| 30      | 43.5    | 0.684759  | -1           | 0.457529  |
| 692.499 | 703.503 | 0.889423  | -0.21287086  | 0.876767  |
| 3545.41 | 3500.71 | 0.826903  | -0.323800119 | 0.837513  |
| 2350.5  | 1933.5  | 0.129555  | -0.754772423 | 0.325935  |
| 7.5     | 5.5     | 0.821423  | -0.206450877 | 0.821423  |
| 7.5     | 8.5     | 0.0867407 | 1.30256277   | 0.106527  |
| 5.7243  | 7.8518  | 0.659105  | -0.510198093 | 0.353     |
| 25052.4 | 27451.6 | 0.845757  | -0.371177003 | 0.782813  |
| 579.828 | 526.258 | 0.833753  | 0.399625397  | 0.787233  |
| 53.4948 | 48.4415 | 0.411998  | -3.248358406 | 0.457724  |
| 99.5    | 104.5   | 0.683035  | -0.936184902 | 0.652879  |
| 22.815  | 19.4289 | 0.311977  | -3.76077271  | 0.383418  |
| 12.8145 | 17.0616 | 0.866375  | -0.457461776 | 0.711647  |
| 22.138  | 24.9729 | 0.438982  | -3.883490486 | 0.385917  |
| 122.469 | 104.891 | 0.959931  | -0.085198426 | 0.939838  |
| 11.5307 | 13.109  | 0.772541  | 0.379482403  | 0.874115  |
| 15.2314 | 15.254  | 0.211231  | -4.155586214 | 0.21069   |
| 8076.62 | 9365.71 | 0.871792  | -0.297968091 | 0.76598   |
| 49.5    | 19.5    | 0.458708  | -0.606988807 | 0.562867  |
| 13      | 6       | 0.35031   | -0.793549123 | 0.783067  |
| 8393.57 | 7473.28 | 0.602291  | -0.535559257 | 0.732417  |
| 11.5    | 10      | 0.637318  | 0.38332864   | 0.509416  |
| 0.5     | 0       | 0.18169   | 1.584962501  | 0.0805096 |
| 3552.47 | 4487.47 | 0.270346  | -1.307269136 | 0.147179  |
| 2919.02 | 2794.52 | 0.647914  | -0.490267613 | 0.695693  |
| 1246    | 1330.5  | 0.988451  | 0.022973336  | 0.962772  |
| 4032.94 | 2535.5  | 0.712944  | 0.615641826  | 0.541577  |
| 43      | 25.5    | 0.425898  | -0.934411658 | 0.90154   |
| 195     | 195     | 0.849454  | -0.3594028   | 0.849454  |
| 17.5    | 21.5    | 0.676715  | -0.807354922 | 0.531318  |
| 653     | 740     | 0.889387  | -0.258182041 | 0.801726  |
| 3685.45 | 3784.54 | 0.920666  | -0.188289152 | 0.903354  |
| 326.5   | 322.5   | 0.611646  | -1.29024325  | 0.618705  |
| 54.5    | 34.5    | 0.993969  | 0.013175389  | 0.758748  |
| 846.5   | 761     | 0.953232  | 0.10752692   | 0.892602  |
| 15898.8 | 13679.5 | 0.69015   | -0.62478959  | 0.808281  |
| 49.3499 | 110.932 | 0.836686  | -0.522825265 | 0.334638  |

|         |         |          |              |          |
|---------|---------|----------|--------------|----------|
| 790.504 | 905.5   | 0.892321 | -0.270168179 | 0.802875 |
| 182.5   | 303.5   | 0.582307 | -1.102361718 | 0.2622   |
| 849     | 1021.5  | 0.640089 | -1.194345367 | 0.531477 |
| 1089.49 | 1174.98 | 0.866812 | -0.301541208 | 0.812772 |
| 1255    | 1380.5  | 0.991152 | 0.017709011  | 0.937305 |
| 580     | 590.501 | 0.878888 | 0.234776146  | 0.891168 |
| 64      | 103.5   | 0.645462 | -0.714597781 | 0.280073 |
| 32.5    | 25.5    | 0.589908 | -0.893084796 | 0.769401 |
| 157     | 130.5   | 0.721461 | 0.535101986  | 0.627376 |
| 145     | 180.5   | 0.728987 | -0.796204798 | 0.590816 |
| 57      | 75      | 0.590989 | -1.078002512 | 0.408095 |
| 4655.96 | 4717    | 0.758102 | -0.669946754 | 0.75     |
| 19      | 12.5    | 0.762231 | -0.604071324 | 1        |
| 113     | 78.5    | 0.822639 | 0.379493382  | 0.656144 |
| 3364.07 | 4686.36 | 0.848562 | -0.412496634 | 0.628711 |
| 952     | 1936    | 0.891638 | 0.359620385  | 0.720768 |
| 56      | 36      | 0.703544 | -0.637429921 | 1        |
| 4410.5  | 4108    | 0.713006 | -0.783108739 | 0.757493 |
| 2058.53 | 2327.41 | 0.940858 | -0.145931838 | 0.861467 |
| 134.681 | 116.892 | 0.547139 | -0.62387912  | 0.701392 |
| 15.5    | 16.5    | 0.53649  | 1.293731203  | 0.553554 |
| 11.2083 | 10.8491 | 0.528959 | -1.486495571 | 0.548291 |
| 303     | 348     | 0.917975 | 0.176786194  | 0.988548 |
| 0       | 2.5     | 0.825659 | #DIV/0!      | 0.407544 |
| 82.5156 | 92.5    | 0.744514 | -0.54737133  | 0.655056 |
| 18      | 18      | 0.797405 | -0.469485283 | 0.797405 |
| 6       | 5.5     | 0.811566 | 0.502500341  | 0.775326 |
| 5.5     | 5.5     | 0.805083 | -0.459431619 | 0.805083 |
| 0.5     | 1       | 0.622002 | #NUM!        | 0.353387 |
| 0       | 2       | 1        | #DIV/0!      | 0.308068 |
| 26.5    | 30.5    | 0.810625 | -0.442518236 | 0.708703 |
| 2       | 2       | 0.866773 | 0.321928095  | 0.866773 |
| 60.5    | 81.5    | 0.851509 | 0.329064276  | 0.946886 |
| 604     | 654.999 | 0.90722  | -0.2257802   | 0.853921 |
| 3476    | 3681.5  | 0.791606 | -0.437906912 | 0.746823 |
| 612.5   | 606     | 0.897121 | -0.245941495 | 0.904032 |
| 3760    | 3418.5  | 0.449722 | -2.334452404 | 0.497997 |
| 509.5   | 404     | 0.40643  | -2.104195087 | 0.532467 |
| 653     | 652.5   | 0.876326 | -0.216512861 | 0.876997 |
| 913.505 | 959.499 | 0.902232 | -0.215954854 | 0.867271 |
| 111.5   | 167.5   | 0.956774 | 0.129837438  | 0.815199 |
| 93      | 81      | 0.801941 | -0.420217738 | 0.901862 |
| 514.5   | 464.5   | 0.846877 | -0.306594485 | 0.924046 |
| 1225.49 | 1144.5  | 0.599325 | -0.78746575  | 0.655509 |
| 898.5   | 788     | 0.708698 | -0.344788356 | 0.873519 |
| 921.5   | 846.5   | 0.777386 | -0.349988519 | 0.859726 |
| 2253    | 2845.5  | 0.861674 | -0.381909445 | 0.713196 |
| 685     | 803.5   | 0.940502 | -0.147330393 | 0.836084 |
| 3059    | 2544.5  | 0.256171 | -0.780777671 | 0.46439  |
| 1260    | 1460    | 0.870483 | -0.311944006 | 0.768415 |
| 861     | 861     | 0.785662 | -0.466781074 | 0.785662 |
| 1701    | 1456    | 0.773431 | -0.358758465 | 0.92015  |
| 743     | 667     | 0.558922 | -0.495559249 | 0.699564 |
| 4656.5  | 4139.5  | 0.540737 | -0.561605973 | 0.682418 |
| 143.5   | 158     | 0.573577 | -0.916979413 | 0.499954 |
| 21.5    | 24.5    | 0.971802 | -0.06871275  | 0.887757 |

|         |         |          |              |          |
|---------|---------|----------|--------------|----------|
| 843     | 1049.5  | 0.86744  | -0.325998363 | 0.714844 |
| 2585.5  | 2162    | 0.543687 | -0.680249727 | 0.725675 |
| 27305   | 22044.5 | 0.131933 | -0.792348477 | 0.344665 |
| 3183.46 | 2541.54 | 0.410096 | -1.484107757 | 0.559101 |
| 1166    | 1196    | 0.775838 | -0.512277153 | 0.757446 |
| 1982    | 2128.5  | 0.980736 | 0.04161219   | 0.970612 |
| 356.5   | 404.001 | 0.854795 | 0.337621827  | 0.927696 |
| 920     | 910     | 0.819215 | -0.352635431 | 0.82805  |
| 1639.18 | 1561.24 | 0.577305 | -0.616091763 | 0.627951 |
| 496.001 | 521.999 | 0.56793  | -0.661877586 | 0.517855 |
| 1596    | 1477    | 0.891525 | -0.181838323 | 0.959655 |
| 1308    | 1334.5  | 0.818385 | -0.351035049 | 0.801878 |
| 642.5   | 658.5   | 0.790646 | -0.435768941 | 0.771476 |
| 2761.5  | 2970.5  | 0.903676 | -0.18746738  | 0.844812 |
| 612     | 652     | 0.823869 | -0.454871478 | 0.782804 |
| 740.503 | 760.496 | 0.802624 | -0.451530921 | 0.783528 |
| 1197.46 | 1278.6  | 0.749302 | -0.56450561  | 0.700433 |
| 3281.52 | 3714.96 | 0.754266 | -0.515580934 | 0.655409 |
| 13295.5 | 14506   | 0.860129 | -0.255642142 | 0.784196 |
| 3392.5  | 3041    | 0.762865 | -0.424352352 | 0.857115 |
| 644     | 573.5   | 0.430644 | -1.442173629 | 0.507175 |
| 744     | 738.5   | 0.79368  | -0.404732491 | 0.799705 |
| 683.602 | 631.645 | 0.81058  | -0.35523661  | 0.875478 |
| 3624.97 | 3708.86 | 0.667208 | -0.5234065   | 0.644482 |
| 1545.5  | 1352.5  | 0.851781 | 0.298305371  | 0.774019 |
| 520     | 424.5   | 0.707201 | -0.454411738 | 0.903085 |
| 530.5   | 608.5   | 0.919088 | -0.202586    | 0.829881 |
| 3511    | 3350    | 0.713723 | -0.487071393 | 0.757094 |
| 694     | 690     | 0.835884 | -0.334193099 | 0.840361 |
| 8168.41 | 6863.87 | 0.495288 | -0.749689822 | 0.671024 |
| 27      | 10.5    | 0.431524 | 0.79970135   | 0.196649 |
| 1625.5  | 1763.5  | 0.774651 | -0.516920721 | 0.714955 |
| 5406.5  | 6025    | 0.824317 | -0.364133873 | 0.738487 |
| 866     | 776     | 0.374528 | -0.689444937 | 0.504603 |
| 336     | 297.5   | 0.934127 | -0.13965199  | 0.984036 |
| 1204.5  | 1174    | 0.753201 | -0.414837887 | 0.777125 |
| 6800.7  | 6445.98 | 0.61656  | -1.063047869 | 0.650813 |
| 3361.17 | 2982.5  | 0.889554 | -0.265021364 | 0.963537 |
| 2383    | 2085    | 0.616139 | -1.223502769 | 0.692635 |
| 1830    | 2036.5  | 0.918507 | -0.198739551 | 0.848093 |
| 2536.51 | 2872.5  | 0.68814  | -0.920611848 | 0.610572 |
| 959     | 941     | 0.941292 | -0.148830682 | 0.95251  |
| 5298.96 | 14108.4 | 0.824624 | 0.417962688  | 0.410511 |
| 620.5   | 593     | 0.761012 | -0.481247791 | 0.796967 |
| 3721.5  | 3954    | 0.890085 | -0.241448695 | 0.846269 |
| 2049.5  | 1667.47 | 0.963935 | -0.066628234 | 0.88765  |
| 13557.6 | 13398.5 | 0.633494 | -1.09487551  | 0.640698 |
| 275.5   | 299     | 0.603189 | -1.279360021 | 0.554715 |
| 10850.3 | 8245.77 | 0.586885 | -1.06992855  | 0.764067 |
| 1595    | 2022    | 0.834633 | -0.420777472 | 0.671482 |
| 1306.5  | 1379.5  | 0.814057 | -0.385707125 | 0.771505 |
| 400     | 498.5   | 0.908279 | -0.230228261 | 0.760202 |
| 1993.01 | 2215.55 | 0.671898 | -0.576510701 | 0.575598 |
| 3208    | 3375    | 0.768312 | -0.471285277 | 0.727498 |
| 7688.5  | 7463.5  | 0.440382 | -0.625253367 | 0.47562  |
| 2075    | 2036    | 0.843442 | -0.315857232 | 0.858146 |

|         |         |           |              |           |
|---------|---------|-----------|--------------|-----------|
| 387.526 | 443.874 | 0.816588  | -0.463933492 | 0.724688  |
| 43.5    | 70.5    | 0.959749  | -0.103093493 | 0.621883  |
| 4       | 6.5     | 1         | 0            | 0.627217  |
| 15.5    | 13      | 0.917158  | -0.146841388 | 0.944686  |
| 1931.5  | 2208    | 0.838557  | -0.346599808 | 0.7354    |
| 7505    | 8017.5  | 0.907447  | -0.204529845 | 0.86027   |
| 1235.5  | 1498    | 0.821685  | -0.489519582 | 0.697961  |
| 2224    | 1941    | 0.650105  | -0.705842088 | 0.758316  |
| 17931.6 | 16896.5 | 0.761245  | -0.44910999  | 0.811041  |
| 2027    | 2081.5  | 0.790955  | -0.430541522 | 0.770081  |
| 6203.01 | 5445.76 | 0.647953  | -0.890255083 | 0.734916  |
| 2832.97 | 2540.53 | 0.840205  | -0.386243395 | 0.909781  |
| 1475    | 1639    | 0.71421   | -0.821731    | 0.647888  |
| 4791.5  | 4984.5  | 0.791293  | -0.459318713 | 0.76182   |
| 2108    | 2023    | 0.754163  | -0.502500341 | 0.786497  |
| 3395    | 3672    | 0.95186   | -0.124411002 | 0.904588  |
| 867.495 | 785.508 | 0.872982  | -0.30025164  | 0.936555  |
| 4039    | 4385    | 0.88321   | -0.301182292 | 0.831165  |
| 3038    | 2569.5  | 0.440909  | -1.6352155   | 0.542831  |
| 2988    | 2897.5  | 0.881258  | -0.227834506 | 0.905673  |
| 721.5   | 751.5   | 0.763615  | -0.482231046 | 0.730972  |
| 1683.5  | 1279.99 | 0.901611  | -0.149748191 | 0.85979   |
| 779.5   | 639.5   | 0.613121  | -0.818502653 | 0.763706  |
| 6460.5  | 6735    | 0.490337  | -0.809394067 | 0.452376  |
| 1059.5  | 1152    | 0.942093  | -0.134027952 | 0.885572  |
| 417.5   | 450.5   | 0.63805   | -1.005192669 | 0.588644  |
| 1241    | 1132.5  | 0.682375  | -0.519897391 | 0.769324  |
| 37      | 56      | 0.975673  | -0.039528364 | 0.555268  |
| 561.5   | 569     | 0.66126   | 0.716262889  | 0.667643  |
| 2015    | 2083.5  | 0.7495    | -0.493252168 | 0.721886  |
| 2804.5  | 2335.5  | 0.436741  | -1.500058905 | 0.554462  |
| 3368.5  | 3549.5  | 0.881896  | -0.307439232 | 0.849382  |
| 5510.5  | 5965.5  | 0.653932  | -1.071240456 | 0.606066  |
| 348.326 | 586.42  | 0.825362  | -0.646879241 | 0.536629  |
| 257.174 | 356.58  | 0.693014  | -0.98936942  | 0.495519  |
| 4803.67 | 4816.31 | 0.0500435 | -1.071280087 | 0.0494348 |
| 8472    | 7935    | 0.602371  | -0.70363619  | 0.660835  |
| 3781.5  | 3677.5  | 0.348133  | -0.642461953 | 0.380935  |
| 3392.5  | 2929    | 0.0578623 | -0.948003481 | 0.121163  |
| 2987.78 | 2390.3  | 0.0242595 | -1.047046279 | 0.0812651 |
| 3888    | 4065.5  | 0.507166  | -0.703829653 | 0.46264   |
| 2559.5  | 2106.5  | 0.469375  | -0.827790842 | 0.657005  |
| 2678.5  | 2895.5  | 0.178256  | -0.699833897 | 0.124182  |
| 934.5   | 1169    | 0.280685  | -0.806004716 | 0.12873   |
| 4625.5  | 5179.5  | 0.217198  | -0.708042794 | 0.134223  |
| 2846.98 | 2447.57 | 0.668137  | -0.488656383 | 0.824151  |
| 4963    | 4670.5  | 0.0135623 | -1.121229801 | 0.0186011 |
| 1945    | 1928.5  | 0.756922  | -0.450834493 | 0.764247  |
| 851     | 680.5   | 0.398788  | -0.791967715 | 0.641523  |
| 179.5   | 168     | 0.578428  | -0.499155347 | 0.660768  |
| 8673    | 6762    | 0.199741  | -0.793016922 | 0.489747  |
| 6461.03 | 7216.76 | 0.0597893 | -0.968144455 | 0.0351978 |
| 2152    | 2010.5  | 0.384037  | -0.774546156 | 0.454913  |
| 7232.08 | 8363.4  | 0.113734  | -1.042775206 | 0.0632026 |
| 4780.5  | 4154    | 0.215832  | -0.822866902 | 0.354578  |
| 3265    | 2948    | 0.255943  | -0.976334362 | 0.342922  |

|         |         |           |              |           |
|---------|---------|-----------|--------------|-----------|
| 4533.54 | 4462.98 | 0.326116  | -0.870879743 | 0.340342  |
| 7579    | 8068    | 0.0325595 | -1.067413355 | 0.0240118 |
| 5861.5  | 5810    | 0.683018  | -0.629262401 | 0.69026   |
| 2151.47 | 2109.95 | 0.634335  | -0.589317665 | 0.653207  |
| 2245.5  | 2144    | 0.674588  | -0.566766969 | 0.716613  |
| 1337.5  | 1275.5  | 0.414466  | -0.61135816  | 0.473282  |
| 3121    | 4088.5  | 0.264275  | -0.870545299 | 0.104315  |
| 1348    | 1046.5  | 0.34888   | -0.755456184 | 0.65154   |
| 2489.5  | 2790    | 0.20698   | -0.960275868 | 0.138953  |
| 6358    | 6858    | 0.159814  | -0.888262917 | 0.117538  |
| 2608    | 2363    | 0.415231  | -0.822718047 | 0.513366  |
| 1176.5  | 1618.5  | 0.405264  | -0.867130255 | 0.174955  |
| 676.504 | 750.5   | 0.827035  | -0.414696328 | 0.754526  |
| 706.5   | 661.5   | 0.581717  | -0.887116922 | 0.632696  |
| 53      | 72      | 0.538842  | -1.40599236  | 0.355444  |
| 1737    | 2121    | 0.484658  | -0.845756116 | 0.319183  |
| 1656    | 1526    | 0.685036  | -0.61533615  | 0.752114  |
| 1856    | 1893    | 0.821869  | -0.282441748 | 0.802509  |
| 1619    | 1890.5  | 0.93155   | -0.162038064 | 0.825397  |
| 858.004 | 929.506 | 0.871459  | -0.290539213 | 0.814148  |
| 3898    | 2976    | 0.840047  | -0.298934075 | 0.957372  |
| 285     | 390.999 | 0.950532  | 0.11897749   | 0.837094  |
| 12010.6 | 10380.5 | 0.49097   | -0.991690158 | 0.609218  |
| 23454.8 | 19148   | 0.417811  | -1.430301813 | 0.554412  |
| 446.5   | 782     | 0.70057   | -0.871779028 | 0.342581  |
| 172     | 170     | 0.720534  | -0.483750249 | 0.731243  |
| 0       | 0.5     | 1         | #DIV/0!      | 0.308068  |
| 135.5   | 160     | 0.956007  | -0.093464355 | 0.831089  |
| 1639.02 | 1580    | 0.831395  | -0.368004962 | 0.857869  |
| 2.5     | 4       | 0.820539  | -0.736965594 | 0.57998   |
| 48.5    | 41.5    | 0.937171  | 0.141554144  | 0.850364  |
| 652.5   | 745.5   | 0.682861  | -0.578344622 | 0.564836  |
| 387     | 348.5   | 0.697622  | -0.506077336 | 0.794897  |
| 2020.49 | 2017.45 | 0.826901  | -0.329428833 | 0.828148  |
| 34      | 32      | 0.770421  | 0.46712601   | 0.736998  |
| 5929.5  | 5951    | 0.873459  | -0.224644778 | 0.870321  |
| 490.999 | 519.501 | 0.829298  | -0.313860128 | 0.780411  |
| 804     | 793.5   | 0.966074  | -0.064211903 | 0.976246  |
| 5254    | 5605    | 0.854719  | -0.339783502 | 0.809686  |
| 460     | 395.5   | 0.622528  | -1.012600037 | 0.719371  |
| 2124.5  | 1928.5  | 0.637318  | -0.76231274  | 0.712476  |
| 6061.94 | 8579.05 | 0.691613  | -0.889999298 | 0.466802  |
| 650.5   | 726     | 0.88603   | -0.218700774 | 0.794541  |
| 18742.7 | 18907.2 | 0.792646  | -0.545515065 | 0.78708   |
| 13879.9 | 14031.1 | 0.651319  | -0.663302862 | 0.642102  |
| 2715.5  | 2695.5  | 0.903914  | -0.176981712 | 0.910002  |
| 186.5   | 102.5   | 0.934025  | 0.108019871  | 0.584517  |
| 1332.5  | 1424.5  | 0.934584  | 0.133807778  | 0.981026  |
| 7       | 3       | 0.523243  | -0.807354922 | 0.825659  |
| 665     | 574     | 0.82281   | -0.349304534 | 0.934831  |
| 326     | 338.5   | 0.939879  | -0.086633309 | 0.900584  |
| 229.5   | 430.153 | 0.938713  | -0.198494154 | 0.561205  |
| 466     | 638     | 0.538171  | -1.945322907 | 0.375423  |
| 5       | 11      | 0.942559  | -0.152003093 | 0.383951  |
| 1711    | 2709.5  | 0.247033  | -2.721033316 | 0.0941276 |
| 275.5   | 418.5   | 0.377441  | -2.662965013 | 0.193456  |



|         |         |           |              |          |
|---------|---------|-----------|--------------|----------|
| 1.5     | 2.5     | 0.669515  | -1.584962501 | 0.415333 |
| 13      | 7       | 0.783067  | -0.378511623 | 0.783067 |
| 85      | 137.5   | 0.915666  | 0.255944981  | 0.817995 |
| 4399.51 | 5040.89 | 0.9029    | -0.266698005 | 0.820745 |
| 6095.06 | 5778.77 | 0.638856  | -0.714072405 | 0.682542 |
| 9       | 16      | 0.647196  | -1.169925001 | 0.310831 |
| 2083.51 | 1536.49 | 0.522267  | -1.663957613 | 0.686281 |
| 3830.5  | 5074    | 0.920295  | 0.222096465  | 0.924215 |
| 492.5   | 450     | 0.902632  | -0.21605946  | 0.962919 |
| 44      | 55.5    | 0.924023  | -0.192645078 | 0.769807 |
| 1426.5  | 1637    | 0.964177  | 0.089692044  | 0.953428 |
| 6185.12 | 5553.69 | 0.827245  | -0.363325682 | 0.905639 |
| 856.68  | 916.592 | 0.924529  | -0.141815075 | 0.868782 |
| 2462.51 | 3140.49 | 0.968554  | -0.081664572 | 0.813881 |
| 642     | 828.5   | 0.838114  | -0.460696216 | 0.677301 |
| 453     | 368.5   | 0.823598  | -0.343586976 | 0.978596 |
| 962.989 | 840.504 | 0.968325  | 0.064458133  | 0.880799 |
| 739     | 835.5   | 0.846695  | -0.24056448  | 0.72281  |
| 659     | 713.5   | 0.799315  | -0.334847428 | 0.723571 |
| 380.5   | 406.5   | 0.426637  | -1.044275637 | 0.375201 |
| 161     | 161.5   | 0.986511  | 0.031026896  | 0.988438 |
| 2655.03 | 2754.51 | 0.846586  | -0.351811743 | 0.820677 |
| 2034    | 1967    | 0.861134  | -0.25497108  | 0.889048 |
| 1237.5  | 1124.5  | 0.656525  | -0.584088405 | 0.744729 |
| 771     | 927     | 0.948816  | 0.122799465  | 0.934663 |
| 921     | 973.5   | 0.880587  | -0.281955268 | 0.842931 |
| 3864    | 3940.48 | 0.862974  | -0.275444627 | 0.847653 |
| 958.999 | 895.999 | 0.747495  | -0.380841827 | 0.816625 |
| 9503    | 9541    | 0.519382  | -0.667031782 | 0.515221 |
| 41.5    | 27      | 0.774277  | -0.28757659  | 0.78875  |
| 43      | 46      | 0.836381  | 0.3016557    | 0.884816 |
| 8.5     | 13.5    | 0.77552   | 0.436099115  | 0.848585 |
| 1741    | 1396.5  | 0.478873  | -1.855807404 | 0.598973 |
| 1139.5  | 1084.5  | 0.86594   | -0.256335216 | 0.905337 |
| 476     | 368     | 0.72848   | -0.586478733 | 0.910425 |
| 144     | 130     | 0.701364  | -0.533300381 | 0.791181 |
| 469     | 740.499 | 0.400435  | -2.229589365 | 0.188338 |
| 489     | 477     | 0.527649  | -0.771299326 | 0.550739 |
| 743.996 | 855.008 | 0.862287  | -0.354275712 | 0.771189 |
| 336     | 340.5   | 0.920901  | -0.16590523  | 0.911209 |
| 3134.5  | 3522    | 0.0790101 | -0.942478548 | 0.045902 |
| 3335.82 | 3535.71 | 0.675894  | -0.551242996 | 0.621538 |
| 1032.99 | 1230.01 | 0.965436  | 0.088051766  | 0.929919 |
| 10642.4 | 8560.18 | 0.976879  | -0.045625285 | 0.878522 |
| 5754    | 6934    | 0.580895  | -1.306404034 | 0.467695 |
| 1267    | 1247    | 0.688179  | -0.464064898 | 0.704739 |
| 17      | 14.5    | 0.721924  | -0.628031223 | 0.834251 |
| 2870    | 2901.5  | 0.72578   | -0.616085018 | 0.717685 |
| 219.5   | 193.5   | 0.772454  | -0.411754915 | 0.879115 |
| 93      | 129     | 0.569148  | -0.681177816 | 0.286545 |
| 250.5   | 275.5   | 0.8172    | -0.445104837 | 0.751528 |
| 3912.5  | 4255    | 0.412295  | -0.519454055 | 0.308065 |
| 969.498 | 1063    | 0.765221  | -0.604814843 | 0.703426 |
| 1499.48 | 1637.5  | 0.761582  | -0.49022621  | 0.690769 |
| 11.5    | 17.5    | 0.88491   | 0.334419039  | 0.88491  |
| 117     | 84      | 0.771169  | 0.410406051  | 0.59608  |

|         |         |           |              |           |
|---------|---------|-----------|--------------|-----------|
| 2047.5  | 2086    | 0.84123   | -0.372113852 | 0.828406  |
| 6       | 5.5     | 0.735995  | -0.777607579 | 0.786566  |
| 3110.25 | 3533.45 | 0.989757  | -0.025957342 | 0.911865  |
| 1872    | 1750.5  | 0.271382  | -0.951501482 | 0.328624  |
| 2445.5  | 2000    | 0.417465  | -0.684635131 | 0.66043   |
| 1751.5  | 1906    | 0.827195  | -0.453574724 | 0.772815  |
| 550     | 531     | 0.834265  | -0.286304185 | 0.865543  |
| 1403.5  | 1274    | 0.451703  | -1.43383341  | 0.51484   |
| 260     | 391.5   | 0.941275  | -0.148923701 | 0.656123  |
| 315     | 257.5   | 0.721052  | -0.517848305 | 0.88677   |
| 789     | 913.004 | 0.452796  | -1.829465624 | 0.371359  |
| 904.498 | 765.503 | 0.731262  | -0.38321935  | 0.905776  |
| 615     | 536.5   | 0.98721   | -0.026037861 | 0.921711  |
| 205     | 159     | 0.56217   | -0.474908955 | 0.90483   |
| 6307.5  | 6069    | 0.617016  | -0.483301233 | 0.662719  |
| 1042    | 1119    | 0.811665  | -0.428949806 | 0.759858  |
| 2914.57 | 2984.43 | 0.961225  | -0.098552385 | 0.947176  |
| 0.5     | 0       | 0.308068  | #NUM!        | 1         |
| 1       | 0       | 0         | #NUM!        | ?         |
| 0.5     | 0.5     | 0.450185  | #NUM!        | 0.450185  |
| 38      | 47.5    | 0.935186  | -0.139403057 | 0.764432  |
| 1.5     | 1.5     | 1         | 0            | 1         |
| 611.5   | 654     | 0.716377  | -0.569708161 | 0.661263  |
| 165.5   | 307.5   | 0.958945  | -0.141868716 | 0.609827  |
| 1872    | 2333.5  | 0.674045  | -0.946294534 | 0.533097  |
| 149     | 237.5   | 0.804151  | -0.71137388  | 0.543154  |
| 1370    | 1308.5  | 0.831862  | -0.370792305 | 0.8646    |
| 550     | 614.5   | 0.788775  | -0.529640621 | 0.712946  |
| 14      | 19      | 0.657905  | -0.900464326 | 0.449992  |
| 158     | 195     | 0.0460925 | -1.326500825 | 0.0196473 |
| 1       | 0       | 0.622002  | -1           | 0.622002  |
| 1051    | 1171    | 0.840548  | -0.314739423 | 0.751561  |
| 1136.19 | 1027.62 | 0.364468  | -0.619154873 | 0.495155  |
| 35244.7 | 32282.8 | 0.369209  | -0.669754463 | 0.474453  |
| 181.5   | 160.5   | 0.580634  | -0.639639593 | 0.704083  |
| 419.5   | 366     | 0.806538  | -0.377136646 | 0.912708  |
| 204.5   | 192.5   | 0.741228  | -0.567432576 | 0.785966  |
| 2957    | 2521.5  | 0.3655    | -2.298697347 | 0.449698  |
| 2       | 10.5    | 0.744998  | 1.459431619  | 0.645561  |
| 2238    | 2494    | 0.688706  | -0.619704335 | 0.598938  |
| 3137    | 3078    | 0.624317  | -0.687021598 | 0.640908  |
| 776.5   | 787.5   | 0.802702  | -0.418447761 | 0.791988  |
| 1       | 0.5     | 0.651448  | -1           | 1         |
| 8       | 7       | 0.371308  | -1.678071905 | 0.453919  |
| 3262    | 3559    | 0.838193  | -0.364909705 | 0.77465   |
| 1833.5  | 1906.5  | 0.702543  | -0.538888356 | 0.667858  |
| 2902.5  | 3272    | 0.50676   | -0.643157379 | 0.383655  |
| 3198    | 3384    | 0.713248  | -0.509812011 | 0.662149  |
| 884.002 | 968.503 | 0.925471  | -0.154910626 | 0.856401  |
| 8501    | 7038.5  | 0.6031    | -0.862511904 | 0.744219  |
| 196     | 228     | 0.854068  | -0.347923303 | 0.747516  |
| 7       | 18.5    | 0.684799  | -2.222392421 | 0.260502  |
| 120.5   | 44      | 0.39655   | 1.136959213  | 0.228428  |
| 73.5    | 87.0001 | 0.78619   | -0.366782331 | 0.627261  |
| 881     | 772     | 0.731287  | -0.478076539 | 0.845969  |
| 1517    | 1589    | 0.819938  | -0.34783685  | 0.781484  |

|         |         |          |              |          |
|---------|---------|----------|--------------|----------|
| 882.5   | 811.5   | 0.559568 | -0.629369392 | 0.648038 |
| 370     | 382.5   | 0.481441 | -1.916671616 | 0.46337  |
| 1695.47 | 1738.47 | 0.733339 | -0.528386172 | 0.712747 |
| 1418.98 | 1212.01 | 0.157135 | -0.913174838 | 0.286474 |
| 656     | 687     | 0.971145 | -0.06178307  | 0.938691 |
| 3285    | 3793.5  | 0.823155 | -0.404390255 | 0.717211 |
| 455.5   | 504     | 0.788825 | -0.42403948  | 0.705978 |
| 24033.5 | 23897.5 | 0.705956 | -0.518433019 | 0.711082 |
| 999.507 | 1064    | 0.8218   | -0.382007022 | 0.774236 |
| 1764    | 1622.5  | 0.201926 | -0.902756138 | 0.270532 |
| 2632.94 | 2801.56 | 0.725255 | -0.518121928 | 0.671745 |
| 5019.2  | 4880.25 | 0.569632 | -0.623789693 | 0.59881  |
| 3297.5  | 3261.5  | 0.799883 | -0.355400232 | 0.809581 |
| 12      | 8       | 0.428367 | -2.263034406 | 0.633552 |
| 1669    | 2229    | 0.772411 | -0.311377782 | 0.451438 |
| 642.003 | 727.499 | 0.947114 | 0.131962182  | 0.979336 |
| 26924   | 30065   | 0.972136 | -0.065200222 | 0.898967 |
| 11261.7 | 11360.6 | 0.976579 | -0.057617461 | 0.97133  |
| 575     | 572     | 0.508449 | 1.186280063  | 0.506853 |
| 92.5    | 63      | 0.89475  | -0.165059246 | 0.797342 |
| 928.994 | 1136    | 0.748399 | -0.682108422 | 0.614862 |
| 8.5     | 7       | 0.68405  | -0.765534746 | 0.814202 |
| 3.5     | 170.5   | 0.98719  | -1.222392421 | 0.237255 |
| 209     | 328.5   | 0.810545 | 0.557083468  | 0.959026 |
| 160.5   | 136     | 0.768766 | -0.480939436 | 0.891372 |
| 269.5   | 240.5   | 0.984091 | -0.027017551 | 0.923811 |
| 192.5   | 426.5   | 0.584791 | -1.833827133 | 0.199252 |
| 22      | 31.5    | 0.946601 | -0.1740294   | 0.750089 |
| 40      | 37      | 0.716807 | 0.620588756  | 0.680458 |
| 897     | 982.5   | 0.885727 | -0.274661292 | 0.824218 |
| 0       | 0.5     | 0.450185 | #DIV/0!      | 1        |
| 1573.72 | 1452.33 | 0.846638 | -0.312523251 | 0.906803 |
| 2310.01 | 2124.47 | 0.733577 | -0.34712695  | 0.830576 |
| 1612.5  | 1439.5  | 0.60595  | -0.719181763 | 0.704456 |
| 2929.5  | 2812    | 0.668851 | -0.625414544 | 0.703685 |
| 11219.4 | 10076.6 | 0.813054 | -0.381337439 | 0.893984 |
| 9.5     | 6       | 0.249619 | -1.662965013 | 0.557935 |
| 4.5     | 8.5     | 0.933386 | -0.169925001 | 0.473746 |
| 1231.18 | 1195.92 | 0.83338  | -0.33723507  | 0.855847 |
| 810     | 832.5   | 0.855634 | 0.341036918  | 0.870452 |
| 611     | 598.5   | 0.770537 | -0.465494925 | 0.786895 |
| 0       | 0       | ?        | #DIV/0!      | ?        |
| 223     | 399.999 | 0.703883 | -0.949150859 | 0.34909  |
| 2571.5  | 2768.5  | 0.844117 | -0.306373469 | 0.783777 |
| 30120.6 | 25867.7 | 0.626883 | -0.501130331 | 0.79766  |
| 1302    | 1203.5  | 0.448092 | -0.560244106 | 0.553132 |
| 4086    | 2369.5  | 0.954642 | 0.074821265  | 0.621154 |
| 2.5     | 1.5     | 0.733579 | 0.485426827  | 0.509235 |
| 0       | 0.5     | 0.450185 | #DIV/0!      | 1        |
| 4       | 9.5     | 0.921613 | 0.321928095  | 0.663373 |
| 1195.5  | 949.5   | 0.548078 | -1.351493177 | 0.685465 |
| 1344.5  | 1354    | 0.709452 | -0.523260197 | 0.703192 |
| 1072.51 | 973.502 | 0.800823 | -0.389929727 | 0.87719  |
| 0       | 0.5     | 1        | #DIV/0!      | 0.308068 |
| 4828.52 | 4949.15 | 0.604996 | -0.678700688 | 0.582449 |
| 90      | 114     | 0.346386 | -2.633872101 | 0.23828  |

|         |         |          |              |          |
|---------|---------|----------|--------------|----------|
| 147.059 | 462.884 | 0.831673 | -0.807933847 | 0.258121 |
| 425     | 388.5   | 0.62212  | -0.979774972 | 0.681862 |
| 0       | 2.5     | 0.825659 | #DIV/0!      | 0.407544 |
| 32      | 44.5    | 0.498462 | 0.754887502  | 0.762015 |
| 2       | 9.5     | 1        | 0            | 0.234161 |
| 91.5    | 71      | 0.663674 | -0.527015152 | 0.905716 |
| 18      | 27      | 0.550957 | 1.256339753  | 0.6971   |
| 0       | 0       | ?        | #DIV/0!      | ?        |
| 16.5    | 11      | 0.536547 | -0.652076697 | 0.957401 |
| 32.5    | 35.5    | 0.62772  | -0.63005039  | 0.545953 |
| 411     | 382     | 0.803864 | -0.345372682 | 0.867703 |
| 63.5    | 47.5    | 0.954749 | -0.046170181 | 0.695389 |
| 8       | 8.5     | 0.956817 | 0.087462841  | 1        |
| 376.999 | 416.001 | 0.840754 | -0.423990566 | 0.778314 |
| 1598.48 | 1685.48 | 0.89422  | -0.227768035 | 0.855389 |
| 0       | 1       | 1        | #DIV/0!      | 0.308068 |
| 953.49  | 976.515 | 0.926958 | -0.156463444 | 0.9099   |
| 781.011 | 887.496 | 0.955159 | -0.117353976 | 0.877562 |
| 4       | 5.5     | 0.705361 | -0.678071905 | 0.46642  |
| 235.5   | 84.5    | 0.987038 | 0.018262206  | 0.432074 |
| 6750.56 | 4095.32 | 0.870292 | -0.234672949 | 0.792189 |
| 852.501 | 911.5   | 0.944884 | -0.136576606 | 0.902912 |
| 824.501 | 822     | 0.975576 | -0.058018992 | 0.977454 |
| 34.3372 | 38.0828 | 0.63335  | -0.743902198 | 0.549465 |
| 203.767 | 263     | 0.721072 | -0.79425967  | 0.555505 |
| 24.5    | 19.1978 | 0.488348 | -1.527265673 | 0.634862 |
| 11      | 23      | 0.916661 | 0.295455884  | 0.694881 |
| 375.5   | 374.5   | 0.815193 | -0.481206735 | 0.81688  |
| 5       | 11.5    | 1        | 0            | 0.512137 |
| 857     | 838     | 0.778744 | -0.386699424 | 0.798874 |
| 492.5   | 425.5   | 0.826342 | -0.307355294 | 0.94888  |
| 2912.5  | 3021    | 0.58486  | -0.828122456 | 0.555157 |
| 788     | 682     | 0.908509 | -0.159549547 | 0.973856 |
| 1364.51 | 1995.51 | 0.997045 | -0.007972878 | 0.755573 |
| 5193.5  | 5450    | 0.825714 | -0.404014472 | 0.791633 |
| 1386    | 1364.5  | 0.778518 | -0.408114765 | 0.791947 |
| 875.497 | 625.503 | 0.522471 | -1.601525916 | 0.70635  |
| 109     | 123.5   | 0.625251 | -0.885541275 | 0.534503 |
| 365     | 299.001 | 0.56148  | -1.372201301 | 0.67734  |
| 329     | 304.5   | 0.897508 | -0.204596838 | 0.955076 |
| 396     | 295     | 0.537704 | -0.579508071 | 0.883853 |
| 120     | 101.5   | 0.459232 | -1.531851164 | 0.56352  |
| 803     | 1074    | 0.834715 | -0.502051253 | 0.658635 |
| 1254.5  | 1302.5  | 0.282911 | -2.335794714 | 0.264919 |
| 0       | 0       | ?        | #DIV/0!      | ?        |
| 2298.5  | 3095.5  | 0.941956 | -0.164013512 | 0.760225 |
| 3520.01 | 5093.85 | 0.670869 | -1.009032741 | 0.440726 |
| 201     | 286     | 0.898517 | 0.175496796  | 0.77367  |
| 0       | 0       | ?        | #DIV/0!      | ?        |
| 2553.96 | 2688.48 | 0.572486 | -1.649640547 | 0.545034 |
| 275     | 422.5   | 0.951359 | -0.143285876 | 0.688427 |
| 3560.02 | 2865.98 | 0.549027 | -0.434378071 | 0.876983 |
| 6169.5  | 6373.89 | 0.909927 | -0.239451969 | 0.89059  |
| 466.5   | 478     | 0.512876 | -0.914448556 | 0.492779 |
| 2602.48 | 2333.06 | 0.635251 | -0.695068339 | 0.726831 |
| 3788.55 | 3231.49 | 0.491648 | -0.678579987 | 0.667169 |

|         |         |          |              |          |
|---------|---------|----------|--------------|----------|
| 4955.5  | 4930.5  | 0.591125 | -0.851436338 | 0.595112 |
| 1036.5  | 1076    | 0.665669 | -0.568364012 | 0.630787 |
| 884.5   | 939.5   | 0.982019 | -0.035501584 | 0.936122 |
| 675.5   | 646     | 0.65025  | -0.524830612 | 0.696188 |
| 229.5   | 185     | 0.640556 | -0.566225938 | 0.848276 |
| 592     | 530     | 0.763877 | -0.376563351 | 0.869386 |
| 599.5   | 459     | 0.57681  | -0.6558633   | 0.837358 |
| 968     | 905     | 0.806855 | -0.337662655 | 0.866003 |
| 239.5   | 236     | 0.925381 | -0.125804716 | 0.938395 |
| 932     | 899     | 0.480098 | -0.680550763 | 0.519025 |
| 913     | 971     | 0.59742  | -0.623799706 | 0.536888 |
| 205.5   | 252     | 0.978052 | 0.044925871  | 0.865913 |
| 20      | 18      | 0.9162   | -0.192645078 | 0.983193 |
| 47      | 63      | 0.887865 | -0.232660757 | 0.649055 |
| 122.5   | 111     | 0.83156  | -0.181750437 | 0.964754 |
| 3706    | 3344    | 0.741808 | -0.481966333 | 0.827886 |
| 808.502 | 796     | 0.870588 | -0.220317759 | 0.884552 |
| 2673.5  | 2665.5  | 0.623438 | -0.582401543 | 0.626432 |
| 874     | 811.5   | 0.913322 | -0.148522525 | 0.976616 |
| 7476.5  | 7852.5  | 0.541733 | -0.751153661 | 0.496611 |
| 153     | 229.5   | 0.943704 | -0.15935576  | 0.687556 |
| 2       | 5       | 0.651448 | -1           | 0.139326 |
| 329.5   | 371.5   | 0.865998 | -0.317010743 | 0.782156 |
| 1008    | 939     | 0.631107 | -0.571074918 | 0.701943 |
| 96.5    | 77.5    | 0.82503  | 0.308409771  | 0.689555 |
| 915     | 857     | 0.520282 | -0.58970042  | 0.597304 |
| 2517.2  | 1523.88 | 0.356017 | -1.77520111  | 0.663    |
| 483.661 | 952.503 | 0.70577  | -1.012507519 | 0.311647 |
| 62.5    | 47.5    | 0.756236 | -0.556393349 | 0.937607 |
| 655     | 585     | 0.998509 | -0.003307671 | 0.932026 |
| 1505.5  | 982.5   | 0.451082 | -1.921215943 | 0.679223 |
| 800     | 738.5   | 0.63892  | -0.527512229 | 0.722867 |
| 62.1887 | 116.341 | 0.749161 | -1.023026516 | 0.411642 |
| 3485.07 | 2083.55 | 0.527086 | -1.343856008 | 0.825791 |
| 907.489 | 893.509 | 0.515645 | -2.118384116 | 0.523457 |
| 78.5    | 73.5    | 0.868052 | -0.165337732 | 0.945342 |
| 12.5    | 11      | 0.971997 | -0.058893689 | 0.944048 |
| 110114  | 104254  | 0.715497 | -0.566923166 | 0.759652 |
| 61124.5 | 58357.5 | 0.71424  | -0.593080981 | 0.750489 |
| 24510   | 18248   | 0.428381 | -0.704853718 | 0.777117 |
| 21474   | 20014   | 0.673051 | -0.676218836 | 0.728436 |
| 136050  | 129858  | 0.642551 | -0.720823052 | 0.680183 |
| 126773  | 128880  | 0.744491 | -0.632665722 | 0.733221 |
| 38909   | 21168   | 0.438929 | -0.605369662 | 0.787769 |
| 1376    | 1822    | 0.821836 | -0.490363072 | 0.637849 |
| 1218.5  | 1783.5  | 0.799456 | -0.361386572 | 0.453957 |
| 683     | 597.5   | 0.817713 | -0.315079429 | 0.933223 |
| 1263.5  | 1253    | 0.499161 | -0.610594447 | 0.508725 |
| 1501    | 1456    | 0.482886 | -0.708572351 | 0.514566 |
| 1125    | 928     | 0.364312 | -1.239376882 | 0.511534 |
| 2035.99 | 2022.47 | 0.877795 | -0.255552639 | 0.882735 |
| 3400.5  | 3585    | 0.84051  | -0.392237876 | 0.805195 |
| 6431    | 6113.5  | 0.679238 | -0.563696073 | 0.724861 |
| 1147    | 1351.5  | 0.651347 | -0.931228749 | 0.54106  |
| 611     | 623     | 0.615673 | -0.551124996 | 0.595088 |
| 2123.5  | 2088    | 0.568105 | -0.585132359 | 0.586575 |

|         |         |          |              |          |
|---------|---------|----------|--------------|----------|
| 3617    | 3770.99 | 0.286136 | -0.995221541 | 0.25465  |
| 176     | 174.5   | 0.952761 | 0.071949842  | 0.944906 |
| 200     | 184     | 0.992738 | -0.01449957  | 0.94922  |
| 1689    | 1488    | 0.65382  | -0.616045104 | 0.765633 |
| 540.5   | 619.5   | 0.366595 | -1.141512869 | 0.271417 |
| 221     | 213.5   | 0.730456 | -0.521116019 | 0.75909  |
| 3121    | 3036.5  | 0.348135 | -0.695651786 | 0.37837  |
| 2219.5  | 1955.5  | 0.533363 | -0.792964233 | 0.648717 |
| 1212.5  | 1298    | 0.770519 | -0.546801506 | 0.722221 |
| 270.856 | 265.5   | 0.82318  | -0.339915253 | 0.839465 |
| 233.312 | 160.081 | 0.849892 | -0.19655838  | 0.782506 |
| 971.5   | 934     | 0.739373 | -0.484239302 | 0.773038 |
| 1519.01 | 1467.5  | 0.655613 | -0.656032302 | 0.684805 |
| 731.502 | 758.006 | 0.854441 | -0.304041785 | 0.827316 |
| 1035    | 1054.5  | 0.77814  | -0.570400207 | 0.765905 |
| 4068.5  | 4043    | 0.861647 | -0.310801176 | 0.866054 |
| 3337    | 3079    | 0.935094 | -0.1437643   | 0.987983 |
| 2890.99 | 3283.37 | 0.78448  | -0.38882998  | 0.669952 |
| 2087    | 2178    | 0.733852 | -0.552494939 | 0.699952 |
| 3750.5  | 4239.5  | 0.854584 | -0.372274281 | 0.774113 |
| 3107.39 | 3609.21 | 0.875759 | -0.289455547 | 0.769134 |
| 7098    | 7203.77 | 0.712836 | -0.570054906 | 0.700683 |
| 6176.98 | 6656    | 0.901672 | -0.218458801 | 0.848254 |
| 6777    | 7519    | 0.811902 | -0.430518663 | 0.736028 |
| 837     | 1035.5  | 0.960904 | -0.099905074 | 0.824481 |
| 107     | 103     | 0.74362  | -0.58159565  | 0.771179 |
| 3003    | 3411.5  | 0.859016 | -0.364218168 | 0.775966 |
| 672     | 668     | 0.774819 | -0.420773869 | 0.779903 |
| 1522.5  | 1478    | 0.742182 | -0.403554395 | 0.771644 |
| 1632    | 1644    | 0.69912  | -0.419168762 | 0.691034 |
| 2814.5  | 3341    | 0.881537 | -0.297846083 | 0.766772 |
| 1262.5  | 1366.5  | 0.870889 | -0.267956526 | 0.809717 |
| 2756    | 2870    | 0.634088 | -0.681006343 | 0.599048 |
| 3923.5  | 4109    | 0.769657 | -0.434313385 | 0.730108 |
| 2290    | 2407.5  | 0.807445 | -0.379772169 | 0.766513 |
| 3303.52 | 3558.5  | 0.834002 | -0.316624133 | 0.771408 |
| 5838    | 6148.5  | 0.843484 | -0.34933933  | 0.805864 |
| 1567.5  | 1722.5  | 0.834823 | -0.363359192 | 0.764332 |
| 729.17  | 884.19  | 0.798921 | -0.3604989   | 0.623217 |
| 1772    | 1790.5  | 0.382259 | -0.676119238 | 0.37089  |
| 1174.5  | 1277.5  | 0.765445 | -0.506087479 | 0.700541 |
| 3662.5  | 3267    | 0.494493 | -0.62672475  | 0.627972 |
| 1114    | 1284.5  | 0.824651 | -0.416763549 | 0.723234 |
| 4896.5  | 5133.5  | 0.889924 | -0.187917578 | 0.847022 |
| 95      | 71      | 0.764786 | 0.288125387  | 0.533312 |
| 295.5   | 492.5   | 0.979411 | -0.049667385 | 0.602686 |
| 11      | 6.5     | 0.580435 | -0.874469118 | 0.954624 |
| 42      | 68.5    | 0.3528   | -1.691877705 | 0.126631 |
| 1222.5  | 1334.5  | 0.877405 | -0.240203697 | 0.806033 |
| 10.5    | 6.5     | 0.707394 | -0.691877705 | 1        |
| 419.451 | 341.437 | 0.521906 | -1.64141107  | 0.635818 |
| 501     | 590.5   | 0.856893 | -0.323008361 | 0.735162 |
| 0       | 0       | ?        | #DIV/0!      | ?        |
| 662.501 | 535.999 | 0.409793 | -2.067998074 | 0.525718 |
| 63.5    | 67.5    | 0.897047 | -0.233797185 | 0.854345 |
| 8.5     | 6       | 0.664538 | -0.91753784  | 0.868831 |

|         |         |          |              |          |
|---------|---------|----------|--------------|----------|
| 1.5     | 4       | 0.756486 | -0.584962501 | 0.134292 |
| 1479    | 2184    | 0.961806 | -0.087981144 | 0.669855 |
| 209.5   | 175.5   | 0.63744  | -0.448711588 | 0.850495 |
| 2661.98 | 2720.32 | 0.631749 | -0.658895196 | 0.612435 |
| 8231.53 | 7466    | 0.522155 | -0.813277859 | 0.610571 |
| 244     | 277.5   | 0.912473 | -0.199418307 | 0.821219 |
| 692.501 | 834     | 0.779664 | -0.414692405 | 0.616904 |
| 121     | 81      | 0.49572  | -1.543823806 | 0.726454 |
| 60.5    | 72.5    | 0.80292  | -0.492598483 | 0.677222 |
| 62907.2 | 46455.9 | 0.969246 | -0.04779245  | 0.787893 |
| 242     | 300.5   | 0.832119 | -0.375831417 | 0.667454 |
| 1037.5  | 1011.5  | 0.785058 | -0.397759508 | 0.806683 |
| 64.5    | 873     | 0.936205 | -1.229867542 | 0.141168 |
| 2602.01 | 2466.5  | 0.774867 | -0.507010474 | 0.813176 |
| 12012.5 | 11998.6 | 0.686348 | -0.509378796 | 0.687476 |
| 1102.5  | 1011.5  | 0.698107 | -0.640996536 | 0.763904 |
| 154     | 123.5   | 0.638405 | 0.799297267  | 0.556211 |
| 1290.51 | 999.49  | 0.582957 | -1.373717879 | 0.723789 |
| 2774.1  | 2309.83 | 0.630659 | -1.153176592 | 0.735089 |
| 4036.18 | 3848.21 | 0.924637 | -0.187587487 | 0.953355 |
| 11387.4 | 16689.9 | 0.781659 | 0.592812913  | 0.981358 |
| 1.5     | 3.5     | 0.878232 | -0.584962501 | 0.465798 |
| 682     | 698.5   | 0.892121 | -0.218871075 | 0.873805 |
| 1.5     | 2       | 0.495025 | -1.584962501 | 0.329316 |
| 6651.5  | 6476.5  | 0.588943 | -0.813195856 | 0.610759 |
| 946     | 944.5   | 0.628214 | -1.192209416 | 0.629142 |
| 2308.5  | 2409.5  | 0.628269 | -0.687917123 | 0.591128 |
| 515.5   | 465.5   | 0.772042 | -0.451407904 | 0.852451 |
| 320.5   | 323.501 | 0.755224 | -0.507196923 | 0.747895 |
| 120.5   | 121.5   | 0.866196 | -0.327926836 | 0.860821 |
| 499.5   | 522.5   | 0.408601 | -0.63566594  | 0.358412 |
| 100     | 138     | 0.494185 | -1.888968688 | 0.322938 |
| 16746.6 | 15592.1 | 0.990842 | -0.021043752 | 0.965577 |
| 605.498 | 612.498 | 0.572386 | -0.488761635 | 0.55797  |
| 164.5   | 207.5   | 0.88259  | -0.295854583 | 0.724511 |
| 2457.5  | 2541.5  | 0.686836 | -0.62680426  | 0.659282 |
| 5       | 8       | 0.847821 | -0.514573173 | 0.575098 |
| 0.25    | 0.94038 | 1        | 0            | 0.461792 |
| 4888.87 | 5155.47 | 0.567258 | -0.986760872 | 0.528212 |
| 701.5   | 582     | 0.711594 | -0.487073035 | 0.879544 |
| 59.5    | 4.5     | 0.288367 | 1.870053827  | 0.181116 |
| 12      | 11      | 0.730374 | 0.502500341  | 0.680668 |
| 2729    | 2940    | 0.646364 | -0.724595425 | 0.586335 |
| 1331.5  | 2104    | 0.518982 | -1.708180464 | 0.273363 |
| 3795    | 4814    | 0.461356 | -0.869598669 | 0.272047 |
| 0       | 0.5     | 0.450185 | #DIV/0!      | 1        |
| 771     | 734     | 0.947487 | -0.093733273 | 0.987535 |
| 10.5    | 27.5    | 0.961798 | -0.144389909 | 0.418327 |
| 2075    | 2008    | 0.72383  | -0.644399475 | 0.74721  |
| 228.311 | 164.125 | 0.522023 | -1.211444708 | 0.739204 |
| 2571.5  | 2928.5  | 0.796431 | -0.527494538 | 0.709642 |
| 0.5     | 0       | 0.308068 | #NUM!        | 1        |
| 15      | 14      | 0.401045 | -2.099535674 | 0.438509 |
| 1       | 2.5     | 0.855216 | 0.584962501  | 0.717686 |
| 2.5     | 20      | 0.97767  | -0.321928095 | 0.354021 |
| 1.5     | 3.5     | 0.88627  | -0.584962501 | 0.493436 |

|         |         |          |              |           |
|---------|---------|----------|--------------|-----------|
| 13      | 8.5     | 0.889735 | -0.176877762 | 0.782716  |
| 1.5     | 0       | 0.308068 | #NUM!        | 1         |
| 323     | 282.5   | 0.766401 | -0.583846296 | 0.852358  |
| 844     | 1207    | 0.575286 | -0.838456139 | 0.303671  |
| 1539    | 1467    | 0.717084 | -0.580049402 | 0.754917  |
| 0       | 0       | ?        | #DIV/0!      | ?         |
| 0       | 0       | ?        | #DIV/0!      | ?         |
| 1       | 1       | 0.450185 | #NUM!        | 0.450185  |
| 2.09547 | 0.6392  | 0.137537 | -73.67808827 | 0.58255   |
| 0.25    | 0.05962 | 1        | 0            | 0.561847  |
| 0       | 1.49519 | 0.741541 | #DIV/0!      | 0.478021  |
| 1       | 1.5     | 0.553716 | -5.54816802  | 0.389162  |
| 0       | 0       | ?        | #DIV/0!      | ?         |
| 304     | 228.5   | 0.591939 | -0.685685089 | 0.850393  |
| 2030.5  | 1909.5  | 0.952985 | -0.087507249 | 0.999409  |
| 597.502 | 490.499 | 0.309221 | -0.84993032  | 0.518246  |
| 383.5   | 434.5   | 0.74993  | -0.469340601 | 0.641103  |
| 401.5   | 430     | 0.897786 | -0.222991423 | 0.847931  |
| 1111.99 | 1049.49 | 0.707411 | -0.56337841  | 0.755503  |
| 1583    | 1738.5  | 0.741037 | -0.440474948 | 0.652835  |
| 664     | 710     | 0.810313 | -0.37785995  | 0.755784  |
| 901     | 1012.5  | 0.654265 | -0.519614361 | 0.535273  |
| 2389.98 | 2196.99 | 0.713345 | -0.357026365 | 0.815104  |
| 1021    | 1073    | 0.97078  | -0.065769088 | 0.937465  |
| 1298.5  | 1276.5  | 0.509719 | -0.708726889 | 0.526985  |
| 1898    | 1654.5  | 0.675118 | -0.74815722  | 0.772744  |
| 1314    | 1414.5  | 0.836572 | -0.347125021 | 0.780159  |
| 1527    | 1600    | 0.686138 | -0.784507526 | 0.653776  |
| 1222.5  | 1274    | 0.827299 | -0.362317219 | 0.795583  |
| 950     | 1034    | 0.799116 | -0.465518949 | 0.737948  |
| 280.5   | 309.499 | 0.941985 | -0.131851325 | 0.87397   |
| 1163.5  | 1442    | 0.872541 | -0.323168589 | 0.727406  |
| 622.007 | 811     | 0.659137 | -1.410422287 | 0.520694  |
| 1655    | 2438.5  | 0.751302 | -0.799313971 | 0.516206  |
| 1623    | 1480.5  | 0.769459 | -0.450128164 | 0.843081  |
| 905     | 767     | 0.620629 | -0.39236724  | 0.855852  |
| 958.143 | 883.761 | 0.820161 | -0.325420696 | 0.888369  |
| 10.5    | 11      | 0.866223 | -0.304854582 | 0.833468  |
| 498     | 722     | 0.91156  | -0.235488079 | 0.6633    |
| 198     | 400.5   | 0.729446 | 0.788495895  | 0.8872    |
| 76.5    | 75      | 0.897141 | -0.223964841 | 0.911069  |
| 24      | 21.5    | 0.817689 | 0.36923381   | 0.755393  |
| 14.5    | 17      | 0.245904 | -1.688055994 | 0.170022  |
| 2390.48 | 2379.53 | 0.668968 | -0.533086649 | 0.673441  |
| 1116.5  | 1150.99 | 0.730857 | -0.464782343 | 0.702785  |
| 1613    | 1457    | 0.735799 | -0.399911973 | 0.838331  |
| 2       | 7       | 1        | 0            | 0.133887  |
| 2       | 1.5     | 1        | 0            | 0.834708  |
| 2004.5  | 2293.5  | 0.628579 | 1.005567138  | 0.676731  |
| 1974.5  | 2917.5  | 0.725564 | -0.981487368 | 0.503259  |
| 16651.8 | 23841.6 | 0.630513 | 1.034931054  | 0.774036  |
| 122.5   | 1330.5  | 0.849169 | -2.936637939 | 0.0834621 |
| 315.5   | 3839    | 0.382281 | 3.653245386  | 0.973194  |
| 0.5     | 1       | 0.198892 | 2            | 0.353387  |
| 6977.5  | 7264    | 0.571509 | -0.781763606 | 0.536787  |
| 37.5    | 34.5    | 1        | 0            | 0.943592  |



|         |         |           |              |           |
|---------|---------|-----------|--------------|-----------|
| 697.5   | 620     | 0.608107  | -0.724950218 | 0.709188  |
| 721     | 685     | 0.647278  | -0.701065155 | 0.689097  |
| 2045.5  | 2132.5  | 0.847729  | -0.366151409 | 0.819552  |
| 1969.5  | 2231.5  | 0.772551  | -0.524180151 | 0.680454  |
| 219     | 221.5   | 0.886921  | -0.266992419 | 0.879369  |
| 962     | 884     | 0.915665  | -0.189648825 | 0.971102  |
| 228.5   | 185     | 0.920904  | 0.138364235  | 0.775536  |
| 46      | 35.5    | 0.979931  | -0.047828525 | 0.880277  |
| 184     | 136.5   | 0.974324  | 0.046293652  | 0.775797  |
| 578.5   | 537.5   | 0.45541   | -0.854245054 | 0.523888  |
| 1348.51 | 1653.5  | 0.70156   | -0.796302816 | 0.56388   |
| 0.5     | 0.5     | 0.450185  | #NUM!        | 0.450185  |
| 426.5   | 347.5   | 0.627708  | -0.488474418 | 0.860597  |
| 931     | 904.5   | 0.851489  | -0.334183247 | 0.871634  |
| 214.5   | 213     | 0.836517  | -0.289506617 | 0.842674  |
| 1358.5  | 1368.5  | 0.88132   | -0.254880274 | 0.875992  |
| 3       | 4.5     | 0.493436  | -2.584962501 | 0.301733  |
| 6       | 16      | 1         | 0            | 0.535489  |
| 87.9999 | 85      | 0.0382822 | 0.928587306  | 0.0348379 |
| 0       | 0.5     | 1         | #DIV/0!      | 0.308068  |
| 928.5   | 745.5   | 0.456149  | -0.947366112 | 0.648924  |
| 504.632 | 450.004 | 0.938636  | -0.107472138 | 0.968792  |
| 355     | 422     | 0.93659   | -0.172467196 | 0.832083  |
| 17.5    | 17      | 0.767983  | -0.544320516 | 0.788255  |
| 209     | 272.5   | 0.7067    | -0.684991319 | 0.509411  |
| 0       | 1.51344 | 1         | #DIV/0!      | 0.308068  |
| 6       | 11.5    | 0.825863  | -0.584962501 | 0.434615  |
| 8       | 25      | 0.857945  | -0.415037499 | 0.16122   |
| 1       | 1.5     | 0.724378  | 0.584962501  | 1         |
| 54.5    | 58      | 0.638763  | -1.067744607 | 0.600061  |
| 58      | 52      | 0.54041   | -1.050626073 | 0.619964  |
| 51      | 75.5    | 0.866588  | -0.405638801 | 0.625986  |
| 3439    | 3799.92 | 0.833389  | 0.362164962  | 0.893934  |
| 542     | 508.5   | 0.812554  | 0.317662918  | 0.767418  |
| 418.5   | 535     | 0.655474  | 0.458334333  | 0.907589  |
| 12862   | 12626.5 | 0.909941  | -0.166382066 | 0.925002  |
| 587.5   | 517.5   | 0.812097  | -0.299088119 | 0.930792  |
| 7.5     | 12      | 0.967463  | 0.093109404  | 0.746591  |
| 1047    | 1127    | 0.504464  | -0.498715995 | 0.410479  |
| 34860.6 | 34547.1 | 0.879628  | -0.251874022 | 0.886311  |
| 186     | 189     | 0.844034  | -0.32483969  | 0.831838  |
| 1430    | 1426    | 0.740819  | -0.500945825 | 0.743155  |
| 3       | 4       | 0.906975  | 0.222392421  | 0.906975  |
| 62.5    | 48      | 0.802959  | 0.319617934  | 0.634491  |
| 245.5   | 245.995 | 0.950953  | -0.098153246 | 0.949452  |
| 2435.5  | 2578    | 0.679662  | -0.702625704 | 0.636104  |
| 1697.55 | 1884.55 | 0.844395  | -0.39704512  | 0.775661  |
| 3272    | 2516    | 0.457143  | -1.003973761 | 0.677441  |
| 1276    | 1431    | 0.976398  | -0.053556594 | 0.898133  |
| 2099.5  | 2033.5  | 0.815335  | -0.250786358 | 0.85097   |
| 38.6991 | 31.8208 | 0.698512  | -0.518496611 | 0.871936  |
| 34.5    | 42.5    | 0.916664  | -0.177787119 | 0.755537  |
| 3095.8  | 2891.68 | 0.490849  | -0.846662851 | 0.552745  |
| 10963.5 | 10711   | 0.703658  | -0.615382347 | 0.722009  |
| 13591   | 12731.6 | 0.670978  | -0.658032049 | 0.723829  |
| 124     | 114.5   | 0.935213  | -0.114992522 | 1         |

|         |         |          |              |          |
|---------|---------|----------|--------------|----------|
| 344.5   | 345.5   | 0.674682 | -1.040342887 | 0.673008 |
| 0       | 1       | 0.3832   | #DIV/0!      | 0.756486 |
| 2617    | 2885.5  | 0.853917 | -0.260610819 | 0.766552 |
| 1172.5  | 1219    | 0.942679 | -0.119893058 | 0.914315 |
| 3943.42 | 3725    | 0.725816 | -0.521065371 | 0.773558 |
| 1597    | 1654.5  | 0.995352 | -0.008607721 | 0.967234 |
| 1189.5  | 1101    | 0.698615 | -0.408784634 | 0.785309 |
| 2197.5  | 2336    | 0.951404 | -0.114383438 | 0.911422 |
| 1444.5  | 1790.5  | 0.86852  | -0.388483574 | 0.74072  |
| 2972.47 | 2655.5  | 0.469275 | -0.6829677   | 0.595168 |
| 24      | 31.5    | 0.641142 | -0.941106311 | 0.456154 |
| 846.527 | 848.995 | 0.646373 | -0.953919503 | 0.644466 |
| 455.5   | 476     | 0.971059 | -0.058168037 | 0.938174 |
| 5276.97 | 4814.1  | 0.92975  | 0.148736708  | 0.873591 |
| 14594.9 | 11331.7 | 0.408857 | -1.439341173 | 0.580024 |
| 10      | 17      | 0.976055 | 0.070389328  | 0.700418 |
| 667.5   | 819     | 0.851632 | 0.312604265  | 0.990729 |
| 760.652 | 574.937 | 0.280324 | -0.621587006 | 0.717617 |
| 1444.5  | 1407.5  | 0.972354 | -0.064856884 | 0.98846  |
| 554.5   | 605.5   | 0.821343 | -0.388825491 | 0.754782 |
| 687.5   | 671.5   | 0.832903 | -0.32718382  | 0.851698 |
| 1994.56 | 2466.92 | 0.854161 | -0.415490848 | 0.722857 |
| 747.5   | 712     | 0.787278 | -0.425691892 | 0.825713 |
| 507.5   | 525     | 0.61605  | -1.065423075 | 0.594106 |
| 375.5   | 321.5   | 0.625689 | -0.994248384 | 0.725744 |
| 288     | 283     | 0.849565 | -0.340202266 | 0.861793 |
| 694     | 690.5   | 0.781436 | -0.363312703 | 0.786198 |
| 467.5   | 490.5   | 0.932578 | -0.144308702 | 0.897979 |
| 602.5   | 687     | 0.93791  | -0.148681206 | 0.850149 |
| 255.001 | 288     | 0.888972 | -0.276682671 | 0.808609 |
| 466.5   | 780     | 0.924863 | 0.228344415  | 0.784436 |
| 3214.13 | 3922.71 | 0.911637 | -0.213084722 | 0.773944 |
| 1       | 0.5     | 0.353387 | #NUM!        | 0.622002 |
| 1094    | 1095.5  | 0.545039 | -1.878651165 | 0.544332 |
| 26      | 178     | 0.940291 | -0.842458723 | 0.331208 |
| 18780   | 18386.5 | 0.960141 | 0.063091212  | 0.941502 |
| 774.5   | 882.5   | 0.939562 | 0.120554994  | 0.963702 |
| 674     | 652.5   | 0.781655 | -0.429378522 | 0.80783  |
| 28.5    | 26      | 0.541348 | -0.662965013 | 0.636814 |
| 69      | 47.5    | 0.787455 | -0.263034406 | 0.814331 |
| 410     | 422.5   | 0.826197 | -0.401030641 | 0.805011 |
| 240.5   | 184.5   | 0.634462 | -1.045706939 | 0.791268 |
| 1866.5  | 2044    | 0.9859   | -0.032439045 | 0.925758 |
| 345     | 473.5   | 0.987006 | -0.035989857 | 0.794234 |
| 173     | 147     | 0.433544 | -0.790772038 | 0.602169 |
| 253     | 266     | 0.895939 | -0.221442342 | 0.858897 |
| 680     | 755.5   | 0.860039 | -0.306103128 | 0.781389 |
| 3122.05 | 3433.92 | 0.88208  | -0.287460459 | 0.818344 |
| 81.5    | 77.5    | 0.534285 | -0.9224634   | 0.574936 |
| 4365    | 3325    | 0.439376 | -0.670227032 | 0.770594 |
| 1937    | 1843    | 0.583569 | -0.670494786 | 0.631328 |
| 82      | 91.5    | 0.84616  | -0.280736408 | 0.749595 |
| 867     | 910.5   | 0.859389 | -0.284154752 | 0.820861 |
| 9494.46 | 10436   | 0.762028 | -0.481498163 | 0.684891 |
| 282     | 290     | 0.928606 | -0.145197916 | 0.907584 |
| 535     | 578     | 0.993053 | 0.014755726  | 0.952674 |

|         |         |          |              |           |
|---------|---------|----------|--------------|-----------|
| 94.5    | 141.5   | 0.815894 | -0.517848305 | 0.549186  |
| 1094.5  | 891     | 0.682246 | -0.492429894 | 0.88217   |
| 359     | 326     | 0.821035 | -0.302964691 | 0.906978  |
| 1374    | 1496    | 0.884955 | 0.245161716  | 0.939865  |
| 2380    | 2148    | 0.528782 | -1.020143732 | 0.606372  |
| 347     | 385.5   | 0.636347 | -1.195617869 | 0.574821  |
| 228.5   | 224.5   | 0.804477 | -0.456671988 | 0.816729  |
| 200.5   | 255     | 0.969855 | 0.080462028  | 0.887829  |
| 2091.5  | 2024.5  | 0.6377   | -0.874239206 | 0.660698  |
| 19      | 21      | 0.729252 | -0.662965013 | 0.658631  |
| 506     | 512     | 1        | 0            | 0.99192   |
| 91      | 95.0001 | 0.817576 | -0.388853567 | 0.784836  |
| 2554.5  | 2606.5  | 0.909401 | -0.201831543 | 0.895393  |
| 681.501 | 687.496 | 0.896658 | 0.210394981  | 0.902401  |
| 1682.99 | 4026.82 | 0.87233  | 0.414711718  | 0.61678   |
| 0       | 0       | ?        | #DIV/0!      | ?         |
| 4.5     | 3       | 0.912416 | 0.152003093  | 0.665262  |
| 2.5     | 3.5     | 0.672563 | -1.321928095 | 0.493436  |
| 22.5    | 19      | 0.887907 | 0.236067358  | 0.792515  |
| 596     | 701     | 0.936239 | -0.146365986 | 0.82188   |
| 1894.5  | 2045.5  | 0.703769 | -0.502817674 | 0.631735  |
| 157     | 141     | 0.581032 | -0.533069516 | 0.707153  |
| 4615    | 5081    | 0.857829 | -0.359536488 | 0.794667  |
| 5749.67 | 4908.04 | 0.801472 | -0.422868113 | 0.914711  |
| 1675    | 1575.5  | 0.757422 | -0.536268244 | 0.802164  |
| 1728    | 1445    | 0.6357   | -0.648978994 | 0.792204  |
| 522.5   | 493.5   | 0.511191 | -0.654247796 | 0.573302  |
| 2558.51 | 1747.98 | 0.326541 | -1.887498543 | 0.555287  |
| 1345.5  | 1475.5  | 0.687532 | -0.556300319 | 0.604245  |
| 2303    | 2289.5  | 0.778837 | -0.376915081 | 0.784256  |
| 1810.01 | 1968.53 | 0.639192 | -1.144051742 | 0.589154  |
| 2133.48 | 2031.48 | 0.899234 | -0.216257546 | 0.933682  |
| 720.5   | 953     | 0.761251 | -0.766636461 | 0.594824  |
| 76.5    | 245     | 0.970674 | 0.143491594  | 0.481877  |
| 6434.96 | 3759.98 | 0.847792 | -0.338979963 | 0.850005  |
| 1327    | 1676.5  | 0.772794 | -0.676985129 | 0.62792   |
| 319     | 297.5   | 0.997916 | -0.004529658 | 0.957313  |
| 1954    | 1251    | 0.906266 | -0.201744615 | 0.836552  |
| 1314    | 1288    | 0.665485 | -0.8699016   | 0.678819  |
| 426.5   | 513     | 0.882602 | -0.316441753 | 0.765832  |
| 1479    | 1405.5  | 0.532339 | -1.660038535 | 0.560613  |
| 7.5     | 10.5    | 0.614917 | 0.900464326  | 0.78291   |
| 1746.32 | 1808.06 | 0.917498 | -0.206982243 | 0.895846  |
| 474.001 | 453.499 | 0.599511 | -0.605662571 | 0.644343  |
| 550     | 576.5   | 0.967484 | -0.08230787  | 0.939297  |
| 62.5    | 84      | 0.85006  | 0.38294387   | 0.980089  |
| 605.5   | 577.5   | 0.774891 | -0.437852129 | 0.813395  |
| 1736.51 | 1744.5  | 0.792923 | -0.385849614 | 0.789013  |
| 3463.5  | 3468.5  | 0.774688 | -0.469725616 | 0.773567  |
| 6.5     | 2.5     | 0.215301 | 0.884522783  | 0.0734682 |
| 1235    | 1275.5  | 0.778866 | -0.456514135 | 0.753409  |
| 1446.49 | 1388.99 | 0.59486  | -1.535438847 | 0.616324  |
| 4315.01 | 4928.51 | 0.911957 | -0.214899219 | 0.823252  |
| 2823.48 | 2511.51 | 0.717867 | -0.545871698 | 0.813227  |
| 1043    | 913     | 0.923965 | 0.142148676  | 0.83396   |
| 749.5   | 682     | 0.954759 | -0.081160625 | 0.970745  |

|         |         |          |              |          |
|---------|---------|----------|--------------|----------|
| 10337.3 | 10611.7 | 0.529891 | -0.55585039  | 0.498916 |
| 2956.5  | 3081    | 0.820676 | -0.342013196 | 0.786141 |
| 2483.5  | 2589    | 0.940247 | -0.138287968 | 0.912624 |
| 1986    | 1808    | 0.795275 | -0.501864852 | 0.856437 |
| 29.5    | 37.5    | 0.769637 | 0.346175641  | 1        |
| 873.5   | 1021.5  | 0.941685 | -0.101778909 | 0.799744 |
| 1163    | 1306    | 0.642013 | -1.152968245 | 0.573276 |
| 866.998 | 1044.5  | 0.954952 | -0.108845725 | 0.829956 |
| 476.5   | 438.5   | 0.923504 | -0.146462977 | 0.986664 |
| 1581.03 | 1603.16 | 0.770529 | -0.472653743 | 0.759571 |
| 2       | 1.5     | 0.680109 | -1           | 0.834708 |
| 607.5   | 574.5   | 0.878442 | -0.250973448 | 0.919519 |
| 242     | 210.5   | 0.993735 | 0.008914725  | 0.863237 |
| 1114.39 | 1081.93 | 0.862326 | -0.234293919 | 0.888772 |
| 2661.93 | 2219.74 | 0.624175 | -0.582777294 | 0.803164 |
| 1153.5  | 1042    | 0.687644 | -0.452413468 | 0.794857 |
| 337     | 337.5   | 0.768726 | -0.498759325 | 0.767605 |
| 3245.14 | 2934.85 | 0.596625 | -0.76765691  | 0.681073 |
| 3704.5  | 3370    | 0.678866 | -0.470279368 | 0.777872 |
| 1       | 1       | 0.530478 | 1            | 0.530478 |
| 7.5     | 5.5     | 0.22629  | -2.906890596 | 0.370457 |
| 791.5   | 753     | 0.887342 | -0.20532963  | 0.928425 |
| 2668.5  | 2993.5  | 0.893948 | -0.258015205 | 0.816803 |
| 18.5    | 18      | 0.82264  | -0.454565863 | 0.839981 |
| 467     | 380.5   | 0.472163 | -0.699860594 | 0.699483 |
| 651.998 | 628.999 | 0.720408 | -0.417986391 | 0.757559 |
| 4304    | 4415    | 0.887816 | -0.176834041 | 0.863088 |
| 2642    | 2641    | 0.644643 | -0.578696419 | 0.645007 |
| 1162    | 1095    | 0.765832 | -0.346343998 | 0.827255 |
| 4656.98 | 4968.44 | 0.842044 | -0.34719238  | 0.79418  |
| 845     | 781.5   | 0.650088 | -0.579424317 | 0.723854 |
| 1265    | 1177    | 0.676473 | -0.672835257 | 0.732892 |
| 26      | 23.5    | 0.986899 | -0.028014376 | 0.947652 |
| 2720    | 2280.5  | 0.60145  | -0.501749132 | 0.810394 |
| 1367.4  | 1303    | 0.529427 | -0.79699979  | 0.573194 |
| 687.5   | 692     | 0.908364 | -0.2218679   | 0.904187 |
| 215     | 158.5   | 0.552319 | -1.272459419 | 0.737254 |
| 1058.5  | 1191.5  | 0.687518 | -0.613177326 | 0.588298 |
| 42      | 43.5    | 0.547838 | -1.584962501 | 0.528083 |
| 300     | 631     | 0.916977 | -0.321928095 | 0.513956 |
| 635.5   | 524.001 | 0.916475 | -0.199308808 | 0.969877 |
| 651.501 | 957.501 | 0.941215 | -0.16151182  | 0.692811 |
| 851     | 834.998 | 0.634042 | -0.917632026 | 0.647113 |
| 488     | 377.999 | 0.634305 | -0.886343218 | 0.805711 |
| 1052.48 | 1363.01 | 0.765406 | -0.725569466 | 0.608293 |
| 2       | 2       | 1        | 0            | 1        |
| 11.5    | 14.5    | 0.897964 | 0.231325546  | 0.948817 |
| 508.5   | 496.5   | 0.757095 | -0.47835131  | 0.776531 |
| 64      | 53      | 0.796488 | -0.37064338  | 0.950067 |
| 7.5     | 7       | 1        | 0            | 0.964596 |
| 1140.5  | 1071.5  | 0.798481 | -0.451547158 | 0.842791 |
| 172.5   | 117.5   | 0.573276 | -1.154328146 | 0.807921 |
| 375.5   | 437.5   | 0.756261 | -0.691582192 | 0.659351 |
| 32      | 26      | 0.613921 | -1.093109404 | 0.740638 |
| 107.5   | 220     | 0.873332 | -0.347313413 | 0.382037 |
| 1219.01 | 993.496 | 0.916695 | -0.153462163 | 0.930526 |

|         |         |          |              |          |
|---------|---------|----------|--------------|----------|
| 138     | 173     | 0.788609 | -0.486472637 | 0.619011 |
| 235     | 361.5   | 0.958347 | -0.098439817 | 0.639321 |
| 217.5   | 373     | 0.916853 | -0.241309635 | 0.567719 |
| 744.002 | 856.002 | 0.989603 | 0.026883736  | 0.927338 |
| 931     | 1067    | 0.822412 | -0.53620787  | 0.742715 |
| 473     | 769.5   | 0.991545 | 0.018185472  | 0.616453 |
| 2242.5  | 1960    | 0.537838 | -0.73803823  | 0.666992 |
| 5435    | 5131.5  | 0.6609   | -0.566106921 | 0.714917 |
| 260.542 | 254.684 | 0.801518 | -0.378784637 | 0.820303 |
| 30410   | 28285.5 | 0.756817 | -0.382112176 | 0.827666 |
| 7617    | 8398    | 0.832666 | -0.293352444 | 0.743615 |
| 1331.5  | 1314    | 0.848859 | -0.279488903 | 0.859949 |
| 14429.1 | 13129.5 | 0.760669 | -0.369623388 | 0.85382  |
| 362.5   | 387.5   | 0.919405 | -0.193498155 | 0.875588 |
| 1651    | 1870.5  | 0.817863 | -0.401989219 | 0.723527 |
| 1653.5  | 1934    | 0.89744  | -0.242674762 | 0.788161 |
| 68      | 83      | 0.742615 | -0.71242341  | 0.612186 |
| 850     | 881.5   | 0.332265 | -1.736965594 | 0.311412 |
| 2.5     | 90.5    | 0.98759  | 0.485426827  | 0.238211 |
| 2017.99 | 1488    | 0.939658 | 0.102773471  | 0.732847 |
| 1238.5  | 1355.5  | 0.856067 | -0.336996976 | 0.792756 |
| 453.5   | 473.5   | 0.800348 | -0.476230586 | 0.770308 |
| 4555.44 | 4668.96 | 0.847269 | -0.358540537 | 0.830364 |
| 12.5    | 11.5    | 0.827755 | 0.35614381   | 0.780294 |
| 1389.5  | 1416    | 0.888245 | -0.2499081   | 0.875008 |
| 2350.5  | 2341.5  | 0.330008 | -0.949638512 | 0.333251 |
| 2684.5  | 2820    | 0.921091 | -0.180984324 | 0.887607 |
| 2045.48 | 2311.5  | 0.810348 | -0.466871499 | 0.725838 |
| 962.5   | 888.5   | 0.548911 | -0.663902132 | 0.630957 |
| 800.504 | 798.006 | 0.778563 | -0.488689312 | 0.780873 |
| 0       | 0       | ?        | #DIV/0!      | ?        |
| 1053.5  | 1124    | 0.929928 | -0.151470635 | 0.883301 |
| 324.5   | 289     | 0.813997 | -0.384972626 | 0.899852 |
| 839.866 | 854.526 | 0.247689 | -1.190982746 | 0.236438 |
| 3064.04 | 2853.98 | 0.700848 | -0.457421325 | 0.772574 |
| 608.544 | 591     | 0.991491 | 0.017233822  | 0.971088 |
| 1223    | 935     | 0.843159 | -0.231761564 | 0.907352 |
| 1141    | 1051.5  | 0.808325 | -0.470458237 | 0.861334 |
| 42.8785 | 68.9823 | 0.948019 | -0.163561854 | 0.668579 |
| 5       | 1.5     | 0.873517 | -0.152003093 | 0.375097 |
| 1123.5  | 1563    | 0.835058 | -0.4455341   | 0.613931 |
| 464     | 445.001 | 0.932269 | -0.119898872 | 0.966998 |
| 27253   | 25390.5 | 0.460486 | -0.685981175 | 0.538763 |
| 560     | 640.5   | 0.746921 | -0.367731785 | 0.602741 |
| 3346    | 3472    | 0.641687 | -0.553403621 | 0.604622 |
| 4830.59 | 4533.88 | 0.767524 | -0.440703154 | 0.820106 |
| 565.5   | 574.5   | 0.798876 | -0.427421224 | 0.786848 |
| 1680.51 | 1667.48 | 0.433836 | -0.827444516 | 0.441179 |
| 3509.01 | 3263.46 | 0.814035 | -0.351621948 | 0.873214 |
| 262     | 319.5   | 0.288752 | -1.396798381 | 0.180078 |
| 1592    | 1789    | 0.652981 | -0.631000071 | 0.55007  |
| 1003.5  | 1235.51 | 0.985495 | -0.037876437 | 0.857285 |
| 495     | 522.001 | 0.927213 | 0.165061846  | 0.959906 |
| 283     | 321.5   | 0.923387 | -0.113991107 | 0.789625 |
| 5607    | 5698    | 0.744749 | -0.450549916 | 0.730212 |
| 624.5   | 648.5   | 0.872905 | -0.279530495 | 0.845672 |

|         |         |          |              |          |
|---------|---------|----------|--------------|----------|
| 583     | 662     | 0.984719 | -0.035067231 | 0.898908 |
| 1032.5  | 1080    | 0.734189 | -0.431667499 | 0.690403 |
| 93.5    | 96      | 0.996173 | -0.007735649 | 0.977041 |
| 735.5   | 634     | 0.772035 | -0.311910187 | 0.932503 |
| 363     | 364     | 0.813859 | -0.338918811 | 0.811481 |
| 847.5   | 800.5   | 0.817356 | -0.346608493 | 0.863934 |
| 1010.5  | 928     | 0.703537 | -0.507147857 | 0.781381 |
| 1549.86 | 1421.43 | 0.784765 | -0.305358974 | 0.876653 |
| 1135.5  | 1206    | 0.872299 | -0.264178343 | 0.825942 |
| 1024.5  | 1020    | 0.788481 | -0.352346687 | 0.792614 |
| 1640.47 | 1690.47 | 0.865477 | -0.261503234 | 0.841218 |
| 11      | 12      | 1        | 0            | 0.946545 |
| 3003.5  | 2948    | 0.905256 | -0.179291913 | 0.920151 |
| 374     | 338.5   | 0.671877 | -0.595609745 | 0.758692 |
| 3729    | 3538    | 0.145954 | -0.786088664 | 0.185004 |
| 1189    | 966.5   | 0.613264 | -0.57167681  | 0.825354 |
| 1929    | 1945.5  | 0.584599 | -0.495784913 | 0.574222 |
| 452.5   | 439     | 0.5112   | -0.517993234 | 0.55092  |
| 346     | 382     | 0.920683 | -0.196223488 | 0.856642 |
| 1524.5  | 1028    | 0.937447 | -0.123424663 | 0.816398 |
| 989     | 1091.5  | 0.783906 | -0.559657755 | 0.718305 |
| 7469.38 | 6950.13 | 0.537172 | -0.671914375 | 0.611534 |
| 126.5   | 120     | 0.519915 | -0.853710558 | 0.565876 |
| 5456.98 | 4746    | 0.725894 | -0.495403902 | 0.845391 |
| 18772.4 | 17546.2 | 0.740102 | -0.506218356 | 0.795208 |
| 3.5     | 4.5     | 0.393741 | -1.807354922 | 0.258505 |
| 53.5    | 71      | 0.656471 | 0.684797768  | 0.834958 |
| 2.5     | 2       | 0.885352 | 0.263034406  | 0.774348 |
| 30058.2 | 26760.8 | 0.820339 | -0.210496021 | 0.965061 |
| 1355.08 | 1294.47 | 0.723702 | -0.489533511 | 0.764499 |
| 478     | 647.5   | 0.992075 | -0.022815895 | 0.815605 |
| 873.5   | 778.5   | 0.639267 | -0.579604678 | 0.750302 |
| 686     | 719.5   | 0.530488 | -2.164676923 | 0.506918 |
| 73.5    | 55.5    | 0.830093 | -0.292781749 | 0.942756 |
| 4290    | 4323    | 0.620123 | -0.636048047 | 0.612946 |
| 343.5   | 357     | 0.819757 | -0.289739969 | 0.78222  |
| 16964   | 12937.5 | 0.893374 | -0.109645752 | 0.765215 |
| 2441.99 | 3001.96 | 0.957196 | -0.075512855 | 0.769753 |
| 1103.7  | 1102.61 | 0.662553 | -0.607256636 | 0.663428 |
| 811.001 | 954.997 | 0.575058 | -1.516354958 | 0.483038 |
| 1259    | 1240    | 0.930133 | -0.132527426 | 0.94211  |
| 146     | 207.5   | 0.932809 | 0.141092319  | 0.794969 |
| 696.5   | 799.5   | 0.595313 | -0.79832111  | 0.482982 |
| 343.5   | 471     | 0.92288  | -0.176238775 | 0.686705 |
| 8.5     | 7.5     | 0.683522 | -0.91753784  | 0.758199 |
| 157.5   | 180     | 0.739723 | -0.662583398 | 0.647837 |
| 5140.56 | 5182.4  | 0.848081 | -0.254569085 | 0.840594 |
| 1286.5  | 1314.49 | 0.667954 | -0.624467502 | 0.649443 |
| 2219.02 | 2285.75 | 0.893784 | -0.218179109 | 0.87131  |
| 244.5   | 222     | 0.567236 | -1.441837559 | 0.622144 |
| 882     | 1167    | 0.816661 | -0.523715312 | 0.638126 |
| 1286    | 1332    | 0.670479 | -0.824849189 | 0.646144 |
| 2335.5  | 2193.5  | 0.912772 | -0.160228503 | 0.963131 |
| 1229.5  | 1195    | 0.791911 | -0.412887869 | 0.814665 |
| 5582.85 | 5076.49 | 0.392211 | -0.787026494 | 0.49126  |
| 9555.02 | 8852.94 | 0.634841 | -0.595467152 | 0.70782  |

|         |         |           |              |          |
|---------|---------|-----------|--------------|----------|
| 2737.77 | 2828.5  | 0.874971  | -0.292352077 | 0.852755 |
| 336.5   | 333.5   | 0.860958  | -0.352803543 | 0.866587 |
| 14      | 38.5    | 0.7725    | 0.777607579  | 0.677676 |
| 798.5   | 863.5   | 0.891838  | -0.239202473 | 0.835279 |
| 372.5   | 396.5   | 0.804595  | -0.411813598 | 0.756144 |
| 4504.5  | 4238    | 0.893213  | -0.240629638 | 0.934146 |
| 940     | 834.5   | 0.7497    | -0.50582954  | 0.842153 |
| 2416.01 | 2340.51 | 0.687147  | -0.645486555 | 0.712305 |
| 304.5   | 257     | 0.742338  | -0.628246598 | 0.853391 |
| 1888    | 2187    | 0.922432  | -0.202283526 | 0.830164 |
| 402.5   | 466.5   | 0.947655  | 0.130153236  | 0.964164 |
| 72      | 59.5    | 0.628215  | -0.777607579 | 0.774393 |
| 987     | 827     | 0.739855  | -0.556737318 | 0.868767 |
| 2218.5  | 2392.5  | 0.831201  | -0.435888738 | 0.782198 |
| 1589.5  | 1690.5  | 0.890427  | -0.253355192 | 0.847907 |
| 1478.5  | 1511.47 | 0.966054  | -0.076647894 | 0.951443 |
| 250.5   | 221.5   | 0.532332  | -1.240746339 | 0.613095 |
| 2574.5  | 2690    | 0.888113  | -0.276829429 | 0.859782 |
| 3900    | 3527.5  | 0.329376  | -0.675115562 | 0.450754 |
| 1226.5  | 1116.5  | 0.863268  | -0.261036132 | 0.936975 |
| 5935.5  | 5779.5  | 0.136112  | -2.216046275 | 0.14537  |
| 2154    | 2384.5  | 0.946143  | -0.139849642 | 0.884265 |
| 4569.58 | 4225.51 | 0.856184  | -0.309837208 | 0.911741 |
| 1199.5  | 1040    | 0.78627   | -0.458379599 | 0.889126 |
| 1878.5  | 2153    | 0.983689  | -0.038920489 | 0.894617 |
| 3604    | 3339.5  | 0.606029  | -0.550061272 | 0.688861 |
| 790.5   | 887     | 0.314296  | -1.56862993  | 0.248608 |
| 0       | 0.5     | 0.450185  | #DIV/0!      | 1        |
| 1927.5  | 1923.5  | 0.802111  | -0.423168904 | 0.803675 |
| 1576    | 1991    | 0.762877  | -0.733308571 | 0.62146  |
| 954.004 | 1017.51 | 0.849267  | -0.381166556 | 0.807231 |
| 1473.33 | 1497.49 | 0.89333   | -0.257434432 | 0.88274  |
| 40      | 51      | 0.818249  | -0.567040593 | 0.675015 |
| 185.5   | 187.5   | 0.874641  | -0.249873158 | 0.866263 |
| 4.5     | 2       | 0.368277  | -3.169925001 | 0.718453 |
| 3947    | 3732.5  | 0.0760655 | -0.851143781 | 0.101285 |
| 760.5   | 918.5   | 0.928227  | -0.175270302 | 0.800792 |
| 1947.5  | 2047.5  | 0.861136  | -0.299873728 | 0.824012 |
| 957.505 | 897.501 | 0.841887  | -0.349518435 | 0.887361 |
| 422.5   | 524     | 0.842483  | -0.374079377 | 0.686971 |
| 174.5   | 113     | 0.547851  | -0.712373606 | 0.952589 |
| 674     | 606.5   | 0.397048  | -1.957812929 | 0.456551 |
| 69.5    | 82.0001 | 0.971368  | 0.070885462  | 0.926514 |
| 2       | 2.5     | 0.889735  | 0.321928095  | 1        |
| 1238    | 1188    | 0.634654  | -0.743389262 | 0.66775  |
| 655.5   | 601     | 0.980627  | -0.037909161 | 0.957291 |
| 4725    | 4975    | 0.875379  | -0.280729622 | 0.838799 |
| 3953    | 3989    | 0.729256  | -0.556414817 | 0.722039 |
| 1005.49 | 1118.49 | 0.825154  | -0.413338719 | 0.749756 |
| 1061    | 1204.49 | 0.921995  | -0.174698133 | 0.831088 |
| 894.492 | 855.005 | 0.760221  | -0.469534414 | 0.796905 |
| 281     | 266     | 0.841075  | -0.346523761 | 0.880259 |
| 1189.52 | 1335.52 | 0.860753  | -0.322862283 | 0.778341 |
| 1775    | 1722.5  | 0.934859  | -0.130490001 | 0.957096 |
| 201     | 206.5   | 0.993589  | -0.010806755 | 0.970092 |
| 225     | 210     | 0.994326  | 0.012767296  | 0.951812 |

|         |         |           |              |          |
|---------|---------|-----------|--------------|----------|
| 4201    | 2263.5  | 0.775633  | 0.466439013  | 0.540624 |
| 464     | 540     | 0.773588  | -0.538308874 | 0.663887 |
| 767     | 808     | 0.995532  | 0.00937427   | 0.967847 |
| 631     | 648.701 | 0.885373  | -0.23582157  | 0.864348 |
| 577     | 587     | 0.905934  | -0.162598891 | 0.890778 |
| 2228.5  | 1715.5  | 0.693843  | -0.599275714 | 0.897556 |
| 522.5   | 500     | 0.646149  | -0.764844627 | 0.679845 |
| 2134.5  | 2015.5  | 0.932624  | -0.113141643 | 0.982393 |
| 145     | 146.5   | 0.786149  | -0.392006531 | 0.777225 |
| 436.498 | 532.5   | 0.698337  | -0.548244112 | 0.52162  |
| 345     | 347.501 | 0.922266  | -0.145054957 | 0.916407 |
| 920.5   | 973.5   | 0.997101  | -0.007070123 | 0.962979 |
| 147.5   | 149.5   | 0.853423  | -0.244569212 | 0.840933 |
| 580.5   | 527     | 0.799764  | -0.372188082 | 0.879626 |
| 1.5     | 1       | 0.3832    | #NUM!        | 0.545627 |
| 3371.5  | 3536    | 0.764954  | -0.471840704 | 0.726218 |
| 3073.5  | 3123    | 0.776641  | -0.422331578 | 0.763106 |
| 710     | 753     | 0.839632  | -0.359235708 | 0.796912 |
| 346.5   | 339.5   | 0.844633  | -0.373316461 | 0.85816  |
| 435.5   | 441     | 0.755969  | -0.483440556 | 0.745714 |
| 1616    | 1571    | 0.373064  | -0.610405929 | 0.407849 |
| 611     | 655     | 0.514821  | -0.683275926 | 0.445036 |
| 519     | 451.5   | 0.695988  | -0.329592757 | 0.885719 |
| 404.001 | 480.497 | 0.895213  | -0.240366757 | 0.770054 |
| 2661    | 3112.5  | 0.969386  | -0.077400235 | 0.870791 |
| 5971.5  | 6449.5  | 0.719038  | -0.648491717 | 0.662326 |
| 43      | 70      | 0.993882  | -0.016873819 | 0.678263 |
| 933.997 | 918.998 | 0.788356  | -0.396613198 | 0.802022 |
| 1031.49 | 1158    | 0.876363  | -0.326629973 | 0.803461 |
| 364.5   | 515.5   | 0.977323  | 0.060080604  | 0.804855 |
| 604     | 594     | 0.899675  | -0.248300775 | 0.910106 |
| 332     | 406     | 0.91493   | 0.211800357  | 0.965075 |
| 2885    | 2314.5  | 0.570173  | -0.731143237 | 0.77031  |
| 377.5   | 343.5   | 0.590114  | -1.109121722 | 0.651301 |
| 8492    | 8345.5  | 0.801859  | -0.46258863  | 0.813952 |
| 938.489 | 1108    | 0.795443  | -0.550017729 | 0.686748 |
| 2571.45 | 2614.03 | 0.936361  | -0.145022551 | 0.925388 |
| 91.9999 | 113     | 0.911356  | 0.211149232  | 0.960159 |
| 59      | 64.5    | 0.705893  | -0.816553859 | 0.648464 |
| 1532    | 1723    | 0.853378  | -0.406899037 | 0.781451 |
| 458.5   | 406.5   | 0.923442  | -0.112857469 | 0.961096 |
| 3217.5  | 2683    | 0.0627327 | -0.901855006 | 0.159732 |
| 2693.5  | 2625.5  | 0.790545  | -0.401974108 | 0.811616 |
| 400.5   | 395.5   | 0.781932  | -0.414437252 | 0.792437 |
| 505     | 568.5   | 0.877118  | -0.279699859 | 0.791939 |
| 2115    | 2389.5  | 0.769843  | -0.505345333 | 0.676301 |
| 2473    | 2354    | 0.670441  | -0.846830621 | 0.703396 |
| 8593.33 | 8615.04 | 0.440341  | -0.702408889 | 0.437666 |
| 421     | 461.5   | 0.977497  | -0.048794984 | 0.91266  |
| 2686    | 2286.5  | 0.825802  | -0.347532726 | 0.946218 |
| 70      | 33.5    | 0.279992  | -2.175086707 | 0.693402 |
| 523     | 622     | 0.89195   | -0.265795546 | 0.774189 |
| 1507.5  | 1586    | 0.426535  | -0.557238018 | 0.364357 |
| 1483    | 1246.5  | 0.697644  | -0.558454914 | 0.843374 |
| 3097.48 | 2878.46 | 0.661622  | -0.522088856 | 0.735179 |
| 656.5   | 720.5   | 0.595995  | -1.149197835 | 0.53644  |



|         |         |           |              |            |
|---------|---------|-----------|--------------|------------|
| 3267.07 | 2769.63 | 0.799851  | -0.358411285 | 0.937442   |
| 1486    | 1838    | 0.815965  | -0.533700488 | 0.684247   |
| 457.5   | 457.5   | 0.930834  | 0.163780261  | 0.930834   |
| 1364.52 | 1526.95 | 0.921259  | -0.180582114 | 0.84281    |
| 0.5     | 3       | 0.648511  | 2            | 0.758682   |
| 9       | 11.5    | 0.477033  | -1.847996907 | 0.343535   |
| 148     | 78.0001 | 0.650882  | 0.715359138  | 0.448324   |
| 463     | 452.5   | 0.988141  | -0.025145648 | 0.996294   |
| 1398    | 1465.01 | 0.943267  | -0.151659144 | 0.91615    |
| 2209.49 | 2505.01 | 0.92078   | -0.173227829 | 0.828791   |
| 1.5     | 0.5     | 0.439843  | 2            | 0.357091   |
| 93.5    | 97.5    | 0.952169  | -0.095683348 | 0.920415   |
| 2638.5  | 2988.5  | 0.844803  | -0.346259052 | 0.75231    |
| 58.5    | 70.5    | 0.897246  | 0.269186633  | 1          |
| 142     | 150.5   | 0.96999   | -0.072931522 | 0.933646   |
| 1322.5  | 1351    | 0.566891  | -1.145050333 | 0.552683   |
| 278.5   | 236.5   | 0.360071  | -1.746494086 | 0.459577   |
| 609.5   | 893.5   | 0.0171466 | -1.751636524 | 0.00408863 |
| 66636   | 63390.2 | 0.715377  | -0.402328575 | 0.769537   |
| 501     | 507.5   | 0.932299  | -0.146892811 | 0.923267   |
| 423.5   | 441     | 0.855438  | -0.340355759 | 0.827654   |
| 1256.5  | 1379.51 | 0.991251  | -0.019640761 | 0.928069   |
| 8       | 4.5     | 0.64626   | -0.678071905 | 0.937823   |
| 781.5   | 876.5   | 0.462358  | 1.291149513  | 0.497449   |
| 790     | 631     | 0.977737  | 0.03339512   | 0.790263   |
| 2875.13 | 2821.55 | 0.938435  | -0.131815486 | 0.951544   |
| 20.5    | 16      | 0.767174  | -0.357552005 | 1          |
| 967.5   | 907.5   | 0.812616  | -0.365448754 | 0.8636     |
| 1       | 0       | 0.756486  | 0.584962501  | 0.3832     |
| 505     | 607.5   | 0.921046  | -0.200420222 | 0.800336   |
| 2.5     | 4.5     | 0.862169  | -0.321928095 | 0.414414   |
| 14.5    | 23      | 0.626416  | -1.688055994 | 0.391053   |
| 98.5    | 122     | 0.625297  | -0.97819563  | 0.47967    |
| 198.5   | 271.499 | 0.938372  | -0.173563579 | 0.74514    |
| 14.5    | 25      | 0.5715    | -2.5360529   | 0.320484   |
| 24.5    | 20      | 0.909709  | 0.140177658  | 0.752815   |
| 1308.5  | 1244.5  | 0.778004  | -0.49028625  | 0.814512   |
| 959.505 | 1017    | 0.814997  | -0.364085842 | 0.767295   |
| 1418.49 | 1636.52 | 0.925638  | 0.173246973  | 0.984748   |
| 1783.5  | 1745    | 0.716241  | -0.449556319 | 0.73776    |
| 1       | 2.5     | 0.724378  | -1           | 0.219102   |
| 256.962 | 250.003 | 0.933139  | 0.165089746  | 0.918278   |
| 1469.5  | 1792    | 0.998582  | 0.003432071  | 0.871657   |
| 655     | 705     | 0.914858  | -0.213244039 | 0.868114   |
| 331     | 256.5   | 0.67156   | -0.622494557 | 0.87763    |
| 255.5   | 308.5   | 0.708223  | -0.725716453 | 0.574728   |
| 22.5    | 24      | 0.496541  | -1.684498174 | 0.459547   |
| 967.5   | 757.5   | 0.941652  | 0.09938655   | 0.769      |
| 272     | 319     | 0.984061  | -0.040338929 | 0.884801   |
| 74      | 96      | 0.894939  | 0.266280065  | 0.950796   |
| 396     | 366.5   | 0.859211  | -0.311944006 | 0.912707   |
| 1362.02 | 1453.47 | 0.550614  | -1.297787403 | 0.509677   |
| 767.5   | 699     | 0.703273  | -0.666650861 | 0.77127    |
| 819     | 663     | 0.989894  | 0.022720077  | 0.869539   |
| 12443   | 12074.9 | 0.662557  | -0.750062802 | 0.685069   |
| 473     | 269     | 0.752124  | -0.48268435  | 0.869462   |

|         |         |          |              |          |
|---------|---------|----------|--------------|----------|
| 1578.5  | 2479.02 | 0.925869 | 0.199840579  | 0.792772 |
| 558.5   | 654.5   | 0.868077 | 0.323735175  | 0.957945 |
| 121.5   | 176     | 0.811691 | -0.515421567 | 0.563044 |
| 192.5   | 200     | 0.918504 | 0.189362494  | 0.941065 |
| 8.5     | 8.5     | 0.956414 | -0.087462841 | 0.956414 |
| 26.5    | 35      | 0.951005 | -0.142957954 | 0.788238 |
| 67      | 82      | 0.776586 | -0.656698254 | 0.651193 |
| 0       | 0       | 0.308068 | #DIV/0!      | 0.308068 |
| 757     | 882.5   | 0.990672 | -0.023052875 | 0.893612 |
| 0.5     | 0       | 1        | 0            | 0.450185 |
| 99      | 122.5   | 1        | 0            | 0.872869 |
| 411     | 336.5   | 0.537944 | -0.49564251  | 0.810915 |
| 84      | 83      | 0.930437 | 0.146841388  | 0.922744 |
| 166     | 117.5   | 0.909211 | 0.140660407  | 0.665652 |
| 669.002 | 707.501 | 0.898874 | -0.237379963 | 0.861044 |
| 108.5   | 151.5   | 0.794942 | -0.476149014 | 0.542968 |
| 402.5   | 443     | 0.958676 | -0.084888898 | 0.886436 |
| 1691    | 1672.5  | 0.911789 | -0.205007789 | 0.919033 |
| 877     | 1042.5  | 0.811414 | -0.480664098 | 0.693733 |
| 963     | 1062    | 0.943619 | 0.124781625  | 0.992213 |
| 346     | 451     | 0.813234 | -0.576647233 | 0.654429 |
| 1182.35 | 1034.82 | 0.744152 | -0.418635042 | 0.868214 |
| 3355.71 | 3403.44 | 0.818246 | -0.39362229  | 0.807743 |
| 4910.5  | 4768    | 0.706226 | -0.567731728 | 0.730781 |
| 310.5   | 240     | 0.631287 | -1.021061616 | 0.78782  |
| 133     | 161.5   | 0.776525 | -0.493040011 | 0.626527 |
| 719.5   | 776     | 0.870218 | -0.278962582 | 0.813662 |
| 1952.01 | 2014.5  | 0.932626 | -0.165881429 | 0.912878 |
| 623     | 863     | 0.904766 | -0.271861098 | 0.70163  |
| 2       | 1.5     | 0.200976 | #NUM!        | 0.308068 |
| 598.5   | 735.5   | 0.871544 | 0.328421857  | 0.986475 |
| 439.5   | 328     | 0.995147 | 0.00981429   | 0.817332 |
| 3862.86 | 3671.14 | 0.736961 | -0.540560912 | 0.77686  |
| 1360.51 | 1180.48 | 0.760121 | -0.512860874 | 0.863972 |
| 3734    | 3706    | 0.718998 | -0.613545176 | 0.724694 |
| 513.498 | 483     | 0.685274 | -0.924730063 | 0.722068 |
| 9.5     | 7       | 0.476285 | 0.796466606  | 0.350984 |
| 2261    | 3627.5  | 0.657067 | -1.407189253 | 0.404675 |
| 0       | 0       | ?        | #DIV/0!      | ?        |
| 24.5    | 26.5    | 0.801117 | -0.570315725 | 0.753654 |
| 2066    | 2054    | 0.709399 | -0.55524366  | 0.714321 |
| 7.5     | 3.5     | 0.256038 | -1.321928095 | 0.88627  |
| 1944    | 2083    | 0.494262 | -0.582182205 | 0.415155 |
| 5802    | 6676.5  | 0.641663 | -0.712189753 | 0.52612  |
| 1675.5  | 1270.5  | 0.906218 | 0.164228905  | 0.726087 |
| 1094.5  | 1535.5  | 0.919959 | -0.18017686  | 0.661619 |
| 783.5   | 802     | 0.63346  | -0.769868413 | 0.615066 |
| 1007.5  | 1190.5  | 0.876135 | -0.30060709  | 0.760822 |
| 59.5    | 67.5    | 0.633093 | -0.745070644 | 0.531021 |
| 2       | 3       | 0.822295 | -0.415037499 | 0.515664 |
| 3868    | 4765    | 0.950938 | -0.121535339 | 0.81269  |
| 3197.97 | 2767.5  | 0.934632 | 0.119648976  | 0.834476 |
| 99.5    | 202     | 0.683094 | -1.244307198 | 0.299041 |
| 2444    | 2464    | 0.736335 | -0.471621028 | 0.729062 |
| 109     | 142.5   | 0.555738 | 0.952914864  | 0.687096 |
| 6838    | 6879    | 0.89705  | -0.19354957  | 0.89218  |

|         |         |          |              |           |
|---------|---------|----------|--------------|-----------|
| 844.5   | 808.003 | 0.553911 | -0.845436666 | 0.590979  |
| 187     | 233.5   | 0.660968 | -1.015512999 | 0.521706  |
| 566.5   | 594     | 0.749842 | -0.533063649 | 0.713047  |
| 162     | 147     | 0.760175 | -0.513301516 | 0.832249  |
| 485.5   | 531.5   | 0.933725 | -0.161776253 | 0.875111  |
| 10807   | 10780.5 | 0.819758 | -0.483950312 | 0.82127   |
| 1836.63 | 1692.54 | 0.572586 | -1.56604857  | 0.616601  |
| 977.482 | 1157.01 | 0.891492 | -0.315484574 | 0.792776  |
| 1465    | 1677    | 0.94982  | -0.138390093 | 0.871186  |
| 4098.72 | 5360.61 | 0.88321  | -0.339540343 | 0.719691  |
| 1258    | 1303.5  | 0.851951 | -0.396049399 | 0.830143  |
| 2467.5  | 3298.5  | 0.76439  | -0.786026413 | 0.595987  |
| 1436    | 1450.5  | 0.773307 | -0.488544647 | 0.765694  |
| 281.5   | 299     | 0.808473 | -0.358913983 | 0.756779  |
| 5581    | 5544.5  | 0.843145 | -0.332240284 | 0.848035  |
| 149.5   | 136     | 0.58146  | -0.654146066 | 0.674604  |
| 391.501 | 391.501 | 0.738049 | -0.549471708 | 0.73805   |
| 10.5    | 14      | 0.950072 | -0.144389909 | 0.779645  |
| 213.5   | 207     | 0.762628 | -0.538419915 | 0.784895  |
| 814.998 | 738.01  | 0.72155  | -0.546528811 | 0.801692  |
| 11.5    | 7.5     | 0.157757 | -2.938599455 | 0.342872  |
| 810.5   | 808     | 0.817805 | -0.346386844 | 0.820367  |
| 3523    | 3647.5  | 0.741286 | -0.519319559 | 0.713009  |
| 1874.5  | 1716    | 0.626068 | -0.588622943 | 0.712963  |
| 787.5   | 739.5   | 0.822805 | -0.363748271 | 0.870474  |
| 995.005 | 1103.5  | 0.858423 | -0.308414729 | 0.780836  |
| 51.5    | 39      | 0.656516 | 0.653349476  | 0.534124  |
| 64.8328 | 34.2245 | 0.59976  | 0.710751242  | 0.383442  |
| 3772.97 | 3489.64 | 0.940726 | -0.128748864 | 0.992853  |
| 608     | 554.5   | 0.606257 | -0.798778868 | 0.679954  |
| 34      | 35.5    | 0.635218 | -0.91753784  | 0.605315  |
| 1.5     | 0       | 0.18169  | -1.584962501 | 0.450185  |
| 3145    | 2937    | 0.784817 | -0.399070751 | 0.842278  |
| 1101    | 1118.99 | 0.694482 | -0.446392627 | 0.677305  |
| 22.5    | 12      | 0.626158 | -0.906890596 | 1         |
| 0.5     | 5.5     | 1        | 0            | 0.0344509 |
| 0       | 2       | 0.438509 | #DIV/0!      | 0.785812  |
| 266     | 293.5   | 0.923905 | -0.181838323 | 0.858318  |
| 1176.5  | 1017    | 0.744506 | -0.539398335 | 0.852817  |
| 40      | 52.5    | 0.954248 | 0.121015401  | 0.882918  |
| 1988.49 | 1644.48 | 0.650275 | -0.804526344 | 0.784626  |
| 3167.07 | 3247.98 | 0.890474 | -0.235247637 | 0.87211   |
| 917.5   | 843     | 0.898775 | -0.193206766 | 0.964219  |
| 586.5   | 652     | 0.835208 | -0.399947689 | 0.762206  |
| 4080.47 | 3865.68 | 0.952706 | -0.089666767 | 0.994012  |
| 3707    | 3507.5  | 0.815601 | -0.306492362 | 0.866543  |
| 555.709 | 519.867 | 0.88547  | -0.190807815 | 0.944866  |
| 339     | 350     | 0.792545 | -0.355292914 | 0.763051  |
| 49      | 57      | 0.869177 | -0.385891154 | 0.781052  |
| 613.999 | 599.503 | 0.599197 | -1.187951033 | 0.613912  |
| 2423.53 | 3277.31 | 0.641876 | -1.300606992 | 0.471822  |
| 482.5   | 768.5   | 0.890471 | 0.276674082  | 0.804586  |
| 4202.34 | 4523.08 | 0.901865 | -0.180326001 | 0.839212  |
| 2278.52 | 2357.55 | 0.819205 | -0.356649423 | 0.791531  |
| 1925    | 2160.01 | 0.990287 | -0.021138767 | 0.909058  |
| 1248    | 1299.5  | 0.892352 | -0.238278307 | 0.863574  |

|         |         |          |              |          |
|---------|---------|----------|--------------|----------|
| 2131    | 2490.5  | 0.908614 | -0.218898802 | 0.801703 |
| 1441    | 1268    | 0.663886 | -0.500624355 | 0.795156 |
| 2432.5  | 2460    | 0.893058 | -0.191586375 | 0.883441 |
| 3802    | 3662    | 0.818357 | -0.337714175 | 0.849746 |
| 2790.48 | 3018.41 | 0.797745 | -0.444551634 | 0.738577 |
| 1596.49 | 1894    | 0.899026 | -0.204486393 | 0.761424 |
| 3674.5  | 3101.61 | 0.517944 | -0.569828002 | 0.72826  |
| 961     | 955     | 0.913401 | 0.194239268  | 0.909674 |
| 1628.49 | 1623    | 0.718402 | -0.57458164  | 0.721102 |
| 195     | 211     | 0.97126  | 0.065095028  | 0.977641 |
| 1030.51 | 999.992 | 0.798811 | -0.442127909 | 0.820746 |
| 9       | 2.5     | 0.82986  | 0.222392421  | 0.300123 |
| 122     | 133.5   | 0.838605 | -0.471305719 | 0.78583  |
| 2570.51 | 2642.98 | 0.76794  | -0.425079429 | 0.743634 |
| 1665    | 1611    | 0.539952 | -0.500407857 | 0.583004 |
| 603     | 537     | 0.319936 | -0.724261538 | 0.453329 |
| 1132    | 1061    | 0.707836 | -0.432131242 | 0.775218 |
| 4305.62 | 4605.82 | 0.820626 | -0.37758645  | 0.768454 |
| 4966.5  | 4727    | 0.6055   | -0.527725529 | 0.661137 |
| 1405.5  | 1224.5  | 0.598666 | -0.592681594 | 0.741084 |
| 4338.5  | 4730.5  | 0.305849 | -0.711748485 | 0.226469 |
| 4869.51 | 3274.99 | 0.187253 | -0.769528077 | 0.746831 |
| 2925    | 2966    | 0.402639 | -0.560388227 | 0.385016 |
| 2387.5  | 2675    | 0.302773 | -0.658565591 | 0.197732 |
| 1132.03 | 1112.05 | 0.72316  | -0.383570802 | 0.742893 |
| 252.969 | 253.79  | 0.147141 | -0.781751495 | 0.144986 |
| 1679    | 1286    | 0.216526 | -0.772338909 | 0.545604 |
| 976     | 1033    | 0.853332 | -0.342022702 | 0.813788 |
| 1943.5  | 2115.5  | 0.775617 | -0.490334464 | 0.710945 |
| 323     | 350.5   | 0.709782 | -0.413549418 | 0.621145 |
| 1145    | 1118.5  | 0.764534 | -0.428116561 | 0.784906 |
| 1321.5  | 1162    | 0.494045 | -0.564636791 | 0.659536 |
| 8.5     | 9.5     | 0.770719 | -0.628031223 | 0.69935  |
| 633.5   | 532     | 0.638259 | -0.537362966 | 0.816853 |
| 1810.61 | 1833.66 | 0.795114 | -0.452979038 | 0.785793 |
| 4       | 51      | 0.991191 | -0.192645078 | 0.337616 |
| 1618    | 1615    | 0.833053 | -0.391453892 | 0.834326 |
| 1705    | 1597    | 0.784848 | -0.355636206 | 0.845758 |
| 1713.02 | 1693.49 | 0.902705 | 0.178004242  | 0.894333 |
| 1111.5  | 1218    | 0.866788 | -0.326315412 | 0.805395 |
| 189.5   | 251.5   | 0.961899 | 0.070570582  | 0.793063 |
| 327     | 341     | 0.824073 | -0.44625623  | 0.796665 |
| 524     | 510     | 0.837654 | -0.240632707 | 0.865423 |
| 2013    | 1982.5  | 0.123147 | -0.738519257 | 0.132978 |
| 239.5   | 164.5   | 0.702027 | -0.572964968 | 0.986198 |
| 74.5    | 238.5   | 0.737502 | 0.889355936  | 0.601439 |
| 4115    | 3970    | 0.769959 | -0.439671345 | 0.799715 |
| 1172.01 | 2044.46 | 0.782883 | -0.719035733 | 0.447072 |
| 481.5   | 525.5   | 0.910138 | -0.195429998 | 0.84632  |
| 85549.9 | 91690.7 | 0.493901 | -0.842531937 | 0.433151 |
| 3.5     | 5.5     | 0.82986  | 0.514573173  | 0.942676 |
| 4.5     | 6.5     | 0.562066 | 0.830074999  | 0.798692 |
| 967.982 | 1025.5  | 0.860694 | -0.390401835 | 0.82656  |
| 3.5     | 6       | 0.700651 | -1.222392421 | 0.411236 |
| 544.732 | 1256.44 | 0.826452 | -0.519547201 | 0.293036 |
| 104     | 118     | 0.601776 | -1.550692599 | 0.534206 |

|         |         |          |              |          |
|---------|---------|----------|--------------|----------|
| 6       | 2.5     | 0.223462 | -1.584962501 | 0.860525 |
| 4988    | 4750    | 0.368435 | -0.707525225 | 0.422687 |
| 1261.5  | 1288.5  | 0.636734 | -0.609180972 | 0.616863 |
| 431.255 | 356.645 | 0.666882 | -0.492616454 | 0.860633 |
| 1872.5  | 2146    | 0.883581 | -0.274094336 | 0.788134 |
| 693.5   | 374.5   | 0.511394 | -0.951922764 | 0.973922 |
| 1785.5  | 1878.5  | 0.582035 | -0.722627635 | 0.536314 |
| 898.5   | 967     | 0.701776 | -0.491702573 | 0.631144 |
| 39      | 40.5    | 0.25405  | -1.378511623 | 0.231724 |
| 152.533 | 211.534 | 0.94624  | -0.15650488  | 0.750333 |
| 1165    | 1272.5  | 0.913443 | -0.167218618 | 0.841632 |
| 16.5    | 24.5    | 0.893621 | -0.237039197 | 0.584587 |
| 49      | 73.5    | 0.801168 | 0.504231229  | 0.96058  |
| 598     | 550     | 0.682014 | -0.806149159 | 0.737865 |
| 590.5   | 665     | 0.822294 | -0.379244762 | 0.730162 |
| 527.5   | 459     | 0.654501 | -0.515550278 | 0.796873 |
| 1056.5  | 1089.5  | 0.311726 | -1.018553609 | 0.287957 |
| 401.5   | 394     | 0.63353  | -0.504597935 | 0.654337 |
| 67      | 72      | 0.884005 | -0.284729477 | 0.836584 |
| 2265.83 | 2380.38 | 0.903179 | -0.23775409  | 0.871348 |
| 2240.5  | 1126    | 0.876102 | 0.254639111  | 0.586879 |
| 584     | 449.5   | 0.541607 | -1.415037499 | 0.693843 |
| 3917.37 | 4008.6  | 0.902561 | -0.222283169 | 0.886826 |
| 338.563 | 420.783 | 0.932413 | -0.156563656 | 0.777095 |
| 1229    | 1095    | 0.665809 | -0.63391258  | 0.762489 |
| 34570.8 | 34171   | 0.376537 | -0.698091098 | 0.389191 |
| 922.5   | 747.5   | 0.741311 | -0.285255611 | 0.984724 |
| 1324.47 | 1178.5  | 0.5704   | -0.711478214 | 0.679748 |
| 3313.46 | 3213    | 0.264064 | -0.817214525 | 0.292262 |
| 557.5   | 658     | 0.625969 | -0.686116453 | 0.482705 |
| 1937.5  | 1507.5  | 0.605626 | -0.600308474 | 0.854221 |
| 2429    | 2369    | 0.42056  | -0.621808229 | 0.450548 |
| 1625.5  | 1625.5  | 0.811568 | -0.376648994 | 0.811568 |
| 524     | 386.5   | 0.470422 | -0.72281022  | 0.800975 |
| 921     | 741.5   | 0.736405 | -0.384555073 | 0.954683 |
| 0.5     | 0.5     | 0.651448 | 1            | 0.651448 |
| 520.596 | 494.612 | 0.775087 | -0.569564831 | 0.808367 |
| 964.506 | 1139.98 | 0.868484 | -0.335262389 | 0.757435 |
| 2651.51 | 2526    | 0.924754 | -0.152220146 | 0.960257 |
| 2004.5  | 1946    | 0.788588 | -0.411084415 | 0.812705 |
| 1243.5  | 1163    | 0.827866 | -0.354636352 | 0.878243 |
| 1425.5  | 1386    | 0.813152 | -0.358311251 | 0.836136 |
| 1246.98 | 1084.01 | 0.69188  | -0.794376657 | 0.782467 |
| 345.5   | 429     | 0.791619 | -0.596491545 | 0.654762 |
| 924.5   | 695.5   | 0.846268 | -0.314340577 | 0.958857 |
| 206     | 197     | 0.893336 | -0.151225151 | 0.939971 |
| 906.001 | 948.003 | 0.882165 | -0.2880954   | 0.852473 |
| 462.5   | 676     | 0.86406  | 0.374306388  | 0.923691 |
| 1440    | 1416    | 0.807902 | -0.326317955 | 0.823292 |
| 5711.6  | 5887.62 | 0.803053 | -0.442276417 | 0.780931 |
| 4464    | 4923.5  | 0.755501 | -0.514250025 | 0.677938 |
| 8298    | 7705    | 0.732877 | -0.494985986 | 0.795986 |
| 2837.5  | 2929.47 | 0.839997 | -0.327027841 | 0.815103 |
| 2306.5  | 2338.49 | 0.912878 | -0.191357141 | 0.903221 |
| 1355.5  | 1333.5  | 0.981948 | -0.039380549 | 0.992828 |
| 779     | 405     | 0.14148  | -1.998149204 | 0.527037 |

|         |         |          |              |           |
|---------|---------|----------|--------------|-----------|
| 20      | 39      | 0.937306 | -0.234465254 | 0.575451  |
| 367.5   | 359     | 0.851587 | -0.324383747 | 0.868376  |
| 473     | 478.5   | 0.873794 | -0.323453949 | 0.866592  |
| 1472.5  | 1850.5  | 0.445536 | -2.344142829 | 0.331398  |
| 2914    | 2674.99 | 0.054115 | -2.149035602 | 0.0704889 |
| 2638    | 2452.52 | 0.75565  | -0.42968807  | 0.820242  |
| 1358.99 | 1260.5  | 0.812291 | -0.390800805 | 0.868627  |
| 436     | 496.5   | 0.937023 | -0.162704807 | 0.856093  |
| 6.5     | 8.5     | 0.92534  | -0.2410081   | 0.780031  |
| 0       | 0.5     | 1        | #DIV/0!      | 0.308068  |
| 50      | 60      | 0.777727 | 0.454175893  | 0.896191  |
| 114     | 107.5   | 0.913041 | -0.167554097 | 0.958159  |
| 15      | 11.5    | 0.870023 | -0.206450877 | 0.902219  |
| 3578.5  | 3159.5  | 0.558396 | -0.682958363 | 0.681544  |
| 1959.5  | 2170    | 0.867109 | -0.291962896 | 0.791481  |
| 1054    | 1350.5  | 0.970852 | 0.07598395   | 0.878233  |
| 1491    | 1593.01 | 0.936783 | -0.144389909 | 0.891719  |
| 7341    | 6808    | 0.513418 | -0.657505391 | 0.595209  |
| 6122    | 6160.5  | 0.690434 | -0.562630943 | 0.6849    |
| 2914.56 | 3096.99 | 0.797181 | -0.434271991 | 0.750622  |
| 671     | 681     | 0.512373 | -1.030419396 | 0.501112  |
| 649.5   | 692.5   | 0.425457 | -1.921120949 | 0.389897  |
| 1269.99 | 1246.5  | 0.762111 | -0.451049553 | 0.777805  |
| 1498    | 1696.5  | 0.936569 | -0.159728387 | 0.857345  |
| 566     | 603.5   | 0.94223  | -0.101630959 | 0.886411  |
| 590     | 461.5   | 0.543376 | -0.686901756 | 0.790355  |
| 7025.47 | 6903.64 | 0.662051 | -0.64235559  | 0.676908  |
| 926     | 1075.5  | 0.867416 | -0.303160122 | 0.758695  |
| 1840.51 | 2057.51 | 0.908116 | -0.211078823 | 0.829988  |
| 1637.5  | 1726.5  | 0.747344 | -0.668150402 | 0.712685  |
| 896.493 | 1046.5  | 0.900107 | -0.263186007 | 0.802309  |
| 2247.52 | 2159.48 | 0.771172 | -0.460782659 | 0.80282   |
| 3577.5  | 3275.5  | 0.672975 | -0.618312254 | 0.747346  |
| 2461    | 2550.5  | 0.787435 | -0.45928507  | 0.760354  |
| 1374    | 1483    | 0.902248 | -0.225107465 | 0.849398  |
| 2792.5  | 2892    | 0.824702 | -0.382935603 | 0.798748  |
| 118.5   | 112.5   | 0.808164 | 0.437686238  | 0.781773  |
| 2137.52 | 2213.01 | 0.637895 | -0.532301411 | 0.601708  |
| 1459    | 1397    | 0.81897  | -0.376337848 | 0.851799  |
| 2289.5  | 2198.5  | 0.788465 | -0.423983696 | 0.820526  |
| 1944    | 2049.5  | 0.851111 | -0.332355466 | 0.812861  |
| 1659.5  | 1668    | 0.63531  | -0.85182715  | 0.631595  |
| 1038.5  | 1022    | 0.689318 | -0.647420441 | 0.701939  |
| 1651    | 1751    | 0.650935 | -0.656389876 | 0.600347  |
| 1129    | 953.5   | 0.852993 | -0.324646089 | 0.966111  |
| 1281.5  | 1158    | 0.636118 | -0.490727749 | 0.749943  |
| 2.5     | 0       | 0.198892 | -1.321928095 | 0.353387  |
| 644.5   | 721.5   | 0.827734 | -0.390988942 | 0.744953  |
| 364.975 | 498.383 | 0.864733 | -0.256238081 | 0.589699  |
| 203     | 209     | 0.822246 | -0.277318632 | 0.79319   |
| 1444    | 1416.5  | 0.466681 | -0.709585399 | 0.486835  |
| 26.5    | 25      | 0.230213 | -1.027480736 | 0.274227  |
| 2646.48 | 2629.42 | 0.69105  | -0.583646594 | 0.696575  |
| 3902    | 3542    | 0.732583 | -0.569974043 | 0.805359  |
| 944.006 | 1033.51 | 0.823687 | -0.35713141  | 0.750798  |
| 1533.5  | 1647    | 0.851457 | -0.387855597 | 0.806097  |

|         |         |          |              |           |
|---------|---------|----------|--------------|-----------|
| 875.51  | 823.005 | 0.951354 | -0.113973255 | 0.98975   |
| 2.5     | 23.5    | 0.642995 | 0.847996907  | 0.0164616 |
| 11.5    | 18.5    | 0.481044 | -2.201633861 | 0.249029  |
| 1153    | 1089.5  | 0.786924 | -0.47768984  | 0.82741   |
| 1930    | 1859    | 0.978693 | 0.047787899  | 0.955448  |
| 1665    | 1883    | 0.897924 | -0.269286615 | 0.82106   |
| 1502.5  | 1437    | 0.875508 | -0.28226998  | 0.905789  |
| 133     | 136.5   | 0.794811 | -0.470319935 | 0.776172  |
| 14.5    | 6       | 0.508305 | -1.273018494 | 1         |
| 15797   | 15309.5 | 0.685648 | -0.542886632 | 0.714376  |
| 2881.5  | 3122.5  | 0.603753 | -0.686860432 | 0.531234  |
| 5043    | 6017.5  | 0.842959 | -0.216254803 | 0.641816  |
| 6920.71 | 7356.68 | 0.684403 | -0.478983961 | 0.621753  |
| 2559    | 2298.5  | 0.7341   | -0.386199382 | 0.846269  |
| 648     | 732     | 0.926358 | -0.17368692  | 0.843446  |
| 4245.5  | 4374    | 0.688095 | -0.579535641 | 0.662169  |
| 165.5   | 184     | 0.937132 | -0.146685733 | 0.86524   |
| 1922.48 | 2541.47 | 0.7318   | -0.873953912 | 0.566116  |
| 133.5   | 279.5   | 0.831609 | -0.756915184 | 0.456469  |
| 0.5     | 2.5     | 0.825659 | 1            | 0.523243  |
| 115     | 100.5   | 0.683743 | -0.636036685 | 0.790464  |
| 806     | 810.5   | 0.950872 | -0.121306296 | 0.947479  |
| 754.5   | 544     | 0.971076 | 0.054412374  | 0.766486  |
| 537     | 650     | 0.760759 | -0.611397399 | 0.628825  |
| 790.003 | 884.499 | 0.855954 | -0.291441036 | 0.765224  |
| 10.5    | 15.5    | 0.93205  | -0.222392421 | 0.715063  |
| 777     | 676.998 | 0.657193 | -0.568347787 | 0.785956  |
| 545.002 | 549.5   | 0.93798  | -0.149070108 | 0.932785  |
| 2286    | 2234    | 0.856511 | -0.269486032 | 0.875403  |
| 1143.5  | 952.501 | 0.549788 | -0.827204102 | 0.706237  |
| 1675    | 1729.5  | 0.848387 | -0.339802901 | 0.825432  |
| 966.498 | 1144.99 | 0.892639 | -0.215316475 | 0.754757  |
| 363     | 334.5   | 0.878189 | -0.258273032 | 0.936251  |
| 8377.21 | 8462.84 | 0.888684 | -0.222516136 | 0.880813  |
| 1579    | 1565.5  | 0.634899 | -0.776172515 | 0.641588  |
| 5692    | 5691.25 | 0.784418 | -0.431692663 | 0.784523  |
| 569.5   | 589.5   | 0.675507 | -0.772009081 | 0.650708  |
| 1063    | 1328    | 0.877265 | -0.306572052 | 0.724716  |
| 2377.47 | 2020.5  | 0.383883 | -1.646297669 | 0.485754  |
| 921.996 | 1187.49 | 0.851696 | -0.313327695 | 0.649     |
| 1260    | 901     | 0.468552 | -1.646363045 | 0.663319  |
| 275     | 302.5   | 0.981335 | -0.03450953  | 0.902735  |
| 3250    | 3073.42 | 0.912704 | -0.189756241 | 0.951082  |
| 593.5   | 589     | 0.925985 | -0.155112497 | 0.931468  |
| 1023.5  | 956.508 | 0.933725 | 0.128041255  | 0.887372  |
| 555     | 889.5   | 0.936684 | -0.203454625 | 0.663037  |
| 2714.5  | 3007.38 | 0.940347 | -0.154946936 | 0.877722  |
| 1968.98 | 2238.51 | 0.541854 | -1.611191716 | 0.469431  |
| 258.5   | 288.5   | 0.987519 | -0.028178533 | 0.912902  |
| 1102.5  | 1012    | 0.679684 | -0.501083422 | 0.764411  |
| 380.5   | 402     | 0.857291 | -0.350165522 | 0.820764  |
| 523.5   | 492     | 0.922782 | -0.163223172 | 0.96615   |
| 6       | 7.5     | 0.75096  | -0.777607579 | 0.616694  |
| 12.5    | 12      | 0.833297 | 0.310340121  | 0.806314  |
| 80      | 76.5    | 0.872746 | -0.321928095 | 0.900323  |
| 1543.5  | 1544.5  | 0.777378 | -0.426454626 | 0.776838  |

|         |         |           |              |          |
|---------|---------|-----------|--------------|----------|
| 1259.5  | 1241    | 0.76202   | -0.438324352 | 0.774785 |
| 1002.5  | 921.5   | 0.765649  | -0.404284443 | 0.841126 |
| 515.492 | 525.5   | 0.968586  | -0.076115573 | 0.956733 |
| 1768.5  | 1994.83 | 0.63824   | -0.786719345 | 0.545319 |
| 11.6148 | 7.29479 | 0.720331  | -0.76637864  | 0.971823 |
| 157     | 120     | 0.363333  | -0.910916456 | 0.632214 |
| 260.5   | 265.5   | 0.630735  | -0.749015157 | 0.61536  |
| 4       | 7.5     | 0.610398  | -0.678071905 | 0.155182 |
| 38.5    | 56      | 0.845158  | -0.20069735  | 0.409006 |
| 1456.5  | 1938    | 0.781302  | 0.52890689   | 0.943511 |
| 97.5    | 69      | 0.934493  | 0.113768875  | 0.711111 |
| 752     | 775     | 0.914432  | -0.193741767 | 0.89378  |
| 1590    | 1538.5  | 0.844357  | -0.401191373 | 0.864786 |
| 1759.5  | 1812    | 0.658235  | -0.552131108 | 0.629701 |
| 1874    | 1969.5  | 0.867726  | -0.341498901 | 0.836384 |
| 1356    | 702.498 | 0.826873  | 0.362215391  | 0.567029 |
| 0.5     | 0.5     | 0.450185  | #NUM!        | 0.450185 |
| 3.5     | 1       | 0.0576689 | -2.807354922 | 0.651448 |
| 1551.5  | 1238.5  | 0.649678  | -0.491577067 | 0.88918  |
| 4219.96 | 4136.99 | 0.692224  | -0.478673551 | 0.712126 |
| 6205.5  | 6346.93 | 0.851227  | -0.333558489 | 0.835151 |
| 1634.5  | 1510.5  | 0.634735  | -0.49099828  | 0.723686 |
| 1327.34 | 1102.68 | 0.617698  | -0.691619044 | 0.778057 |
| 2628.5  | 2788.5  | 0.880698  | -0.261662892 | 0.837743 |
| 1965    | 1780.5  | 0.631745  | -0.565817451 | 0.730679 |
| 3827.67 | 3925.71 | 0.826274  | -0.387028922 | 0.80791  |
| 2225.49 | 2515.01 | 0.916417  | -0.192129341 | 0.830751 |
| 5773.5  | 5813    | 0.804556  | -0.42863668  | 0.799524 |
| 27308.5 | 30086.2 | 0.876429  | -0.306315902 | 0.812307 |
| 0       | 1       | 1         | #DIV/0!      | 0.308068 |
| 7888.5  | 7916    | 0.632965  | -0.61657992  | 0.629706 |
| 350.5   | 278.5   | 0.828465  | -0.246251432 | 0.946386 |
| 2024.5  | 1649    | 0.564107  | -0.763576377 | 0.746335 |
| 2717    | 2514.5  | 0.768369  | -0.398320104 | 0.838038 |
| 309     | 307.5   | 0.663443  | -0.682748392 | 0.667374 |
| 0.5     | 0.5     | 0.450185  | #NUM!        | 0.450185 |
| 313     | 314     | 0.875214  | -0.307025272 | 0.873162 |
| 24      | 26.5    | 0.857142  | -0.337034987 | 0.787935 |
| 846     | 875     | 0.801135  | 0.322610059  | 0.827619 |
| 93.5    | 145.5   | 0.740514  | -0.888682977 | 0.480952 |
| 0       | 0       | ?         | #DIV/0!      | ?        |
| 1665    | 1815    | 0.937757  | -0.108382306 | 0.861168 |
| 13350.5 | 14164.5 | 0.890731  | -0.299464691 | 0.855724 |
| 184     | 233     | 0.904153  | 0.214530304  | 0.936508 |
| 256.5   | 284.5   | 0.892651  | -0.234630691 | 0.816302 |
| 36.5    | 36      | 0.913655  | -0.123735368 | 0.927979 |
| 531.725 | 329.201 | 0.726244  | 0.427186266  | 0.477489 |
| 128     | 171.5   | 0.851382  | 0.335390355  | 0.955264 |
| 574     | 609     | 0.68645   | -0.734454375 | 0.643309 |
| 0.5     | 0       | 0.308068  | #NUM!        | 1        |
| 0       | 0       | ?         | #DIV/0!      | ?        |
| 462.5   | 542     | 0.906528  | -0.187973638 | 0.778798 |
| 135.5   | 199.5   | 0.784967  | -0.778368293 | 0.569909 |
| 1390.5  | 1331.5  | 0.495348  | -0.783176547 | 0.536737 |
| 931     | 892     | 0.822957  | -0.404230744 | 0.852709 |
| 20702.7 | 21441   | 0.877515  | -0.253370689 | 0.85085  |



|         |         |          |              |          |
|---------|---------|----------|--------------|----------|
| 413.5   | 406     | 0.565579 | -0.749229014 | 0.582113 |
| 5       | 11.5    | 0.812729 | 0.378511623  | 0.452211 |
| 279.5   | 296     | 0.688976 | -0.827496454 | 0.650954 |
| 400.5   | 294.5   | 0.45639  | -1.787677437 | 0.629683 |
| 464     | 614     | 0.931456 | -0.201556132 | 0.766488 |
| 1267    | 1378.52 | 0.892954 | -0.249899471 | 0.83481  |
| 1042    | 1183.01 | 0.922277 | -0.188309668 | 0.837704 |
| 1346.5  | 1398.5  | 0.859263 | -0.276057442 | 0.828741 |
| 545     | 564     | 0.905694 | -0.215131072 | 0.882205 |
| 7220.48 | 6349.04 | 0.441818 | -0.667976348 | 0.593093 |
| 3212.96 | 2801.46 | 0.636055 | -0.497117248 | 0.787797 |
| 6706    | 6201    | 0.314507 | -0.835295479 | 0.39152  |
| 4245.5  | 3730    | 0.581211 | -0.5689108   | 0.724733 |
| 4336.41 | 4431    | 0.55151  | -0.627446406 | 0.528854 |
| 4946.5  | 4583    | 0.281675 | -0.86465903  | 0.353215 |
| 4534.5  | 4212.5  | 0.357343 | -0.736276413 | 0.438015 |
| 7715    | 8004.5  | 0.153774 | -0.766563606 | 0.13     |
| 6224.5  | 6033.5  | 0.329535 | -0.772434994 | 0.361017 |
| 5806.5  | 5378    | 0.288137 | -0.879571603 | 0.359352 |
| 11175.5 | 12216   | 0.215057 | -0.760785442 | 0.150158 |
| 8895.85 | 8822.8  | 0.388912 | -0.706574489 | 0.397774 |
| 5067.57 | 4618.93 | 0.552773 | -0.708821142 | 0.642416 |
| 6657.91 | 6340.67 | 0.59279  | -0.639847062 | 0.6407   |
| 5514.94 | 5081.86 | 0.621653 | -0.543848737 | 0.708536 |
| 817     | 672     | 0.432628 | -0.724365557 | 0.652981 |
| 10145.5 | 9470.5  | 0.287765 | -0.808332882 | 0.355752 |
| 6991.89 | 6410.91 | 0.596518 | -0.604334058 | 0.685204 |
| 8834.67 | 9196.48 | 0.70406  | -0.597333872 | 0.671368 |
| 1459.5  | 1600    | 0.320752 | -0.724988868 | 0.236441 |
| 1588.5  | 1575.5  | 0.404735 | -0.838221409 | 0.412476 |
| 2859    | 2991    | 0.577468 | -0.612858149 | 0.531054 |
| 6117.83 | 5518.93 | 0.582197 | -0.572281857 | 0.695579 |
| 2272.03 | 2230.03 | 0.599997 | -0.620823754 | 0.618499 |
| 12547.5 | 11956.2 | 0.572663 | -0.657206793 | 0.620627 |
| 9402.18 | 9774.88 | 0.520863 | -0.7770382   | 0.485175 |
| 2001    | 2038.5  | 0.852037 | -0.266932999 | 0.835968 |
| 3915    | 2949.5  | 0.326424 | -0.871738629 | 0.630464 |
| 3338    | 3055    | 0.630554 | -0.54395139  | 0.722805 |
| 2933    | 2848.5  | 0.463293 | -0.727812859 | 0.493526 |
| 9237.92 | 9414.36 | 0.725697 | -0.499793705 | 0.709026 |
| 1780.49 | 2025    | 0.901929 | -0.250200112 | 0.819109 |
| 5943.5  | 5500    | 0.74316  | -0.430043469 | 0.814995 |
| 1759.5  | 1816    | 0.794863 | -0.360989621 | 0.766368 |
| 1061.5  | 1093    | 0.629321 | -0.543103494 | 0.59881  |
| 3802    | 3824    | 0.693078 | -0.384005221 | 0.686095 |
| 1251    | 1367.5  | 0.171037 | -0.918178667 | 0.121107 |
| 4817.47 | 4196.48 | 0.614405 | -0.722801472 | 0.731253 |
| 238     | 224.5   | 0.356758 | -1.272765944 | 0.398784 |
| 518.499 | 409.499 | 0.405555 | -0.767898978 | 0.668066 |
| 11.5    | 12.5    | 0.845296 | 0.283792966  | 0.906586 |
| 3.5     | 6.5     | 0.939665 | -0.222392421 | 0.605345 |
| 9       | 16.5    | 0.817364 | -0.710493383 | 0.48631  |
| 175.5   | 180.5   | 0.938199 | -0.151546472 | 0.920623 |
| 17223.7 | 17951.3 | 0.921057 | -0.164493835 | 0.890373 |
| 915.5   | 836     | 0.616702 | -0.789929202 | 0.6885   |
| 178.5   | 229.5   | 0.962276 | 0.093866923  | 0.878081 |

|         |         |          |              |          |
|---------|---------|----------|--------------|----------|
| 715.5   | 733     | 0.830163 | -0.325461021 | 0.810175 |
| 267.5   | 275.499 | 0.791476 | -0.349149564 | 0.763729 |
| 1445    | 1493.5  | 0.803868 | -0.410054092 | 0.77828  |
| 596     | 529.5   | 0.815367 | 0.428289906  | 0.758307 |
| 621     | 717     | 0.982152 | 0.042351091  | 0.925395 |
| 1686    | 2327    | 0.995142 | 0.013626501  | 0.812985 |
| 10.5    | 14      | 0.606977 | -1.392317423 | 0.443179 |
| 3912    | 3095.5  | 0.754096 | -0.51241475  | 0.924033 |
| 1034.5  | 1070.5  | 0.830246 | -0.39083644  | 0.806078 |
| 1940.5  | 2152.5  | 0.90148  | -0.240974306 | 0.832793 |
| 397     | 430.5   | 0.833752 | -0.282056016 | 0.757986 |
| 40      | 64.5    | 0.767479 | -0.767339243 | 0.480142 |
| 50.5    | 55.3586 | 0.898691 | -0.231946728 | 0.83426  |
| 38.5    | 24      | 0.594664 | 0.755581272  | 0.42626  |
| 2110    | 1948.5  | 0.608777 | -0.662566219 | 0.682433 |
| 103     | 91      | 0.964825 | 0.068386975  | 0.881045 |
| 2586    | 2548.5  | 0.824567 | -0.419507511 | 0.834415 |
| 1705.5  | 1756.5  | 0.675841 | -0.619635078 | 0.650803 |
| 867.5   | 866     | 0.895737 | -0.198477523 | 0.897127 |
| 264     | 269.999 | 0.961138 | -0.084392187 | 0.945626 |
| 22      | 50      | 0.86424  | 0.471305719  | 0.698214 |
| 1       | 1.5     | 1        | 0            | 0.785812 |
| 14.5    | 24.5    | 0.894117 | -0.398549376 | 0.615686 |
| 75      | 110     | 0.694848 | 0.532732542  | 0.985778 |
| 8801.56 | 7451.73 | 0.888421 | -0.227951592 | 0.994468 |
| 104.5   | 84      | 0.702736 | 0.605523823  | 0.603785 |
| 25286   | 28880.5 | 0.756655 | -0.529418408 | 0.653628 |
| 2831    | 1857.5  | 0.179337 | -1.042929745 | 0.603166 |
| 8019.2  | 8630.93 | 0.375653 | -2.151859177 | 0.337066 |
| 12150.5 | 11063   | 0.76453  | -0.465522228 | 0.838927 |
| 3355.5  | 3207.5  | 0.795575 | -0.373854199 | 0.83407  |
| 685.5   | 621.5   | 0.750545 | -0.494716861 | 0.828371 |
| 298.5   | 311.5   | 0.975248 | -0.05166212  | 0.944659 |
| 117     | 86      | 0.768176 | -0.386548942 | 0.969829 |
| 2819.98 | 3067    | 0.891115 | -0.226023361 | 0.82667  |
| 26      | 17      | 0.691394 | -0.415037499 | 0.877103 |
| 2624.98 | 3025.96 | 0.864992 | -0.308562044 | 0.761831 |
| 643.996 | 705.5   | 0.804839 | -0.486990006 | 0.742914 |
| 1295.16 | 1357.38 | 0.858371 | -0.339168241 | 0.826628 |
| 1176    | 1358    | 0.863642 | -0.33936129  | 0.766562 |
| 3338.85 | 3604.84 | 0.758226 | -0.630325104 | 0.707346 |
| 692.5   | 962.5   | 0.949785 | 0.140814086  | 0.860248 |
| 1525.5  | 1499.5  | 0.729696 | -0.458722503 | 0.745676 |
| 410.5   | 518.495 | 0.901595 | -0.26337746  | 0.751979 |
| 44.5    | 42      | 0.984482 | -0.032789935 | 0.976726 |
| 952.5   | 1055.5  | 0.963454 | 0.087418292  | 0.973275 |
| 483.5   | 543     | 0.609069 | -1.288015459 | 0.540996 |
| 130.5   | 166     | 0.889182 | -0.253118937 | 0.710871 |
| 52      | 40.5    | 0.787185 | -0.360589715 | 1        |
| 3683    | 3650.5  | 0.506733 | -0.908556356 | 0.514167 |
| 5700.37 | 5269.74 | 0.793859 | -0.440693717 | 0.851737 |
| 287     | 321     | 0.939243 | -0.17055349  | 0.875303 |
| 26      | 42.5    | 0.887443 | 0.299560282  | 0.805114 |
| 785.005 | 969.999 | 0.839217 | -0.480848747 | 0.71269  |
| 385     | 430.5   | 0.618291 | -1.192109854 | 0.550683 |
| 42282.5 | 36994   | 0.747928 | -0.581988565 | 0.840317 |

|         |         |          |              |          |
|---------|---------|----------|--------------|----------|
| 1761    | 2398    | 0.851535 | -0.455749707 | 0.666581 |
| 645.5   | 574     | 0.992065 | -0.017991754 | 0.937115 |
| 2676    | 3325.5  | 0.965812 | 0.082761642  | 0.894089 |
| 482.503 | 851.005 | 0.888925 | -0.390832146 | 0.56733  |
| 382     | 437.5   | 0.622037 | -1.228700674 | 0.541722 |
| 1718.51 | 1738.99 | 0.571678 | -1.515702147 | 0.565072 |
| 50      | 196.5   | 0.716691 | 1.286881148  | 0.707542 |
| 2098    | 1865.5  | 0.392357 | -2.092284457 | 0.456619 |
| 17817.4 | 18630.6 | 0.86026  | -0.370051512 | 0.832671 |
| 814.495 | 1125.49 | 0.668865 | 0.924534576  | 0.803569 |
| 4054.57 | 3146    | 0.528195 | -1.324437024 | 0.685836 |
| 4142.52 | 2125.53 | 0.688025 | -0.600852212 | 0.861407 |
| 486.501 | 499.5   | 0.640591 | -0.766427623 | 0.620028 |
| 1863.5  | 1526    | 0.302071 | -0.860281192 | 0.511919 |
| 926     | 898.5   | 0.281892 | -0.766080145 | 0.311508 |
| 1237.49 | 1037.01 | 0.623295 | -0.396681136 | 0.870124 |
| 1078    | 927.5   | 0.551352 | -0.587306441 | 0.722755 |
| 2799    | 2456.5  | 0.902913 | -0.091495286 | 0.903749 |
| 444.5   | 664     | 0.908322 | -0.197987109 | 0.586664 |
| 7208.93 | 6681.13 | 0.583979 | -0.614162228 | 0.662459 |
| 8010.88 | 8082.8  | 0.846939 | -0.326960075 | 0.840302 |
| 5599.75 | 6039.49 | 0.908985 | -0.223864701 | 0.859924 |
| 181     | 171     | 0.822941 | -0.360294535 | 0.866448 |
| 621.505 | 549.497 | 0.670667 | -0.659398696 | 0.769073 |
| 24.5    | 23.5    | 0.863968 | -0.292781749 | 0.893877 |
| 1538.26 | 1406.96 | 0.67364  | -0.58050511  | 0.752765 |
| 490     | 532.5   | 0.841666 | -0.342313335 | 0.778904 |
| 978.5   | 974.5   | 0.84051  | -0.347588253 | 0.843493 |
| 363     | 320     | 0.826216 | -0.361718681 | 0.918244 |
| 247     | 205     | 0.911815 | -0.160464672 | 0.945624 |
| 110     | 49.5    | 0.875605 | 0.172836597  | 0.431596 |
| 4885.5  | 5154.5  | 0.695185 | -0.844634392 | 0.66076  |
| 836     | 1124    | 0.938796 | -0.148938419 | 0.731758 |
| 2190.55 | 2240.46 | 0.779324 | -0.421984862 | 0.760403 |
| 711.556 | 698.311 | 0.781812 | -0.427371445 | 0.797093 |
| 449     | 487.5   | 0.801559 | -0.484142148 | 0.744735 |
| 766.5   | 705.5   | 0.729959 | -0.496005757 | 0.800967 |
| 3248.5  | 3790.5  | 0.946574 | -0.143712215 | 0.853692 |
| 144.5   | 131.5   | 0.661814 | -1.119643247 | 0.713986 |
| 331.5   | 294.5   | 0.736266 | -0.57196516  | 0.823302 |
| 1710.5  | 1850    | 0.601066 | -0.647445248 | 0.526769 |
| 2640.5  | 2641    | 0.721652 | -0.506284371 | 0.721485 |
| 1059.5  | 1033    | 0.66328  | -0.543356318 | 0.687851 |
| 2011.5  | 2297.5  | 0.392164 | -0.697931617 | 0.265088 |
| 3947    | 3467.08 | 0.746287 | -0.460002395 | 0.856616 |
| 8622.5  | 8977.35 | 0.815244 | -0.275114971 | 0.773141 |
| 856     | 967     | 0.873821 | -0.29541758  | 0.788074 |
| 226.5   | 233     | 0.651509 | -0.533348393 | 0.622854 |
| 121     | 80      | 0.789403 | -0.467652125 | 0.95201  |
| 12      | 32      | 0.9708   | -0.125530882 | 0.465255 |
| 8.5     | 6.5     | 0.440755 | -1.765534746 | 0.596187 |
| 11856.2 | 10837.6 | 0.873248 | -0.315590197 | 0.92835  |
| 355     | 452     | 0.711698 | -0.785174687 | 0.550273 |
| 30      | 16      | 0.340116 | -2.906890596 | 0.637618 |
| 53      | 60.5    | 0.800564 | -0.499101764 | 0.709758 |
| 885     | 627     | 0.176535 | -0.95348329  | 0.534712 |

|         |         |          |              |           |
|---------|---------|----------|--------------|-----------|
| 717.497 | 773.996 | 0.700925 | -0.782921956 | 0.65002   |
| 2477.44 | 2505.45 | 0.704854 | -0.542899596 | 0.695023  |
| 1066    | 892.5   | 0.718031 | -0.39176772  | 0.908258  |
| 2051.5  | 2070    | 0.833819 | -0.340685341 | 0.826867  |
| 3061.5  | 3047.43 | 0.801384 | -0.448172436 | 0.804694  |
| 1340.5  | 1377    | 0.896607 | -0.196879358 | 0.874798  |
| 68.5    | 110.5   | 0.962659 | -0.109347396 | 0.665474  |
| 1263.5  | 1443.5  | 0.890153 | -0.218401561 | 0.782047  |
| 1936.5  | 1969.5  | 0.812811 | -0.362729731 | 0.798925  |
| 1507.01 | 1469.48 | 0.919863 | -0.172160885 | 0.937539  |
| 1887.9  | 1841.23 | 0.765388 | -0.422110737 | 0.787352  |
| 29768.2 | 27494.8 | 0.717449 | -0.480908314 | 0.790311  |
| 7008    | 7029.5  | 0.770724 | -0.400019246 | 0.767948  |
| 946.497 | 810.997 | 0.442043 | -1.055143712 | 0.567891  |
| 1207.5  | 1188    | 0.967939 | -0.062257923 | 0.980192  |
| 3299.5  | 2935    | 0.341612 | -0.921088762 | 0.451399  |
| 297.5   | 362.499 | 0.976611 | 0.057049741  | 0.897128  |
| 5109    | 5802    | 0.876011 | -0.265408376 | 0.77908   |
| 2168.5  | 2083    | 0.352036 | -0.735414071 | 0.39493   |
| 4766.24 | 5087.36 | 0.742646 | -0.428535868 | 0.680352  |
| 124.104 | 87.3076 | 0.506827 | -0.627499324 | 0.912221  |
| 171     | 178     | 0.754056 | -0.669659665 | 0.728524  |
| 2.5     | 0.5     | 0.398521 | -1.321928095 | 0.764931  |
| 372.5   | 305     | 0.816027 | -0.409239655 | 0.950359  |
| 0       | 0       | ?        | #DIV/0!      | ?         |
| 187     | 172.5   | 0.431399 | -1.874469118 | 0.477205  |
| 15      | 11      | 0.683834 | -0.819427754 | 0.873865  |
| 4862.21 | 4155.41 | 0.999331 | 0.001162658  | 0.879433  |
| 7027.46 | 6860.98 | 0.58044  | -1.306350621 | 0.594783  |
| 46      | 104.5   | 0.950856 | 0.176877762  | 0.599314  |
| 108     | 218.5   | 0.889591 | -0.478763097 | 0.535495  |
| 13684.2 | 13457.6 | 0.249231 | -1.865730022 | 0.257887  |
| 1670.5  | 1785    | 0.862797 | -0.340288632 | 0.819103  |
| 4182.04 | 3484.98 | 0.549673 | -0.828467549 | 0.705609  |
| 306.5   | 490.5   | 0.981468 | 0.05766935   | 0.752235  |
| 4013    | 3171.5  | 0.359737 | -2.053093361 | 0.491934  |
| 1       | 3       | 0.450185 | #NUM!        | 0.0805096 |
| 693     | 667.5   | 0.946903 | -0.095748778 | 0.977308  |
| 2423.51 | 2843.52 | 0.954715 | -0.111983617 | 0.850888  |
| 24      | 40.5    | 0.909203 | -0.299560282 | 0.603574  |
| 4750    | 4877    | 0.500499 | -0.803260447 | 0.476355  |
| 218.5   | 270     | 0.470594 | -0.864598874 | 0.29865   |
| 2017.52 | 2360.03 | 0.889042 | -0.272302993 | 0.782755  |
| 1997    | 2271.5  | 0.72948  | -0.604418132 | 0.631521  |
| 2422.5  | 2203.5  | 0.501979 | -0.684817249 | 0.6032    |
| 20      | 24      | 0.774905 | -0.678071905 | 0.664272  |
| 4366    | 4373    | 0.806711 | -0.448465664 | 0.805587  |
| 34      | 18.5    | 0.482615 | -0.91753784  | 0.981644  |
| 618.5   | 608.5   | 0.749123 | -0.454047607 | 0.763427  |
| 2280    | 2773.5  | 0.966826 | -0.091423028 | 0.851195  |
| 2295    | 1885    | 0.911096 | -0.153400715 | 0.931359  |
| 1187    | 1267.5  | 0.81863  | -0.44161475  | 0.773763  |
| 2487.5  | 2593.5  | 0.716316 | -0.466298926 | 0.67613   |
| 4051.99 | 3970.48 | 0.821394 | -0.341257683 | 0.838062  |
| 2666.5  | 2821.5  | 0.722483 | -0.609242143 | 0.679389  |
| 2954.5  | 2504    | 0.49707  | -1.094070056 | 0.620892  |

|         |         |          |              |          |
|---------|---------|----------|--------------|----------|
| 1627    | 1643    | 0.741656 | -0.422445829 | 0.732232 |
| 38      | 39.5    | 0.229768 | -1.389946518 | 0.20804  |
| 3545.49 | 3651.94 | 0.654264 | -0.776005824 | 0.63205  |
| 4801    | 4604.5  | 0.636763 | -0.505458276 | 0.682524 |
| 12870.5 | 12685   | 0.672619 | -0.586364346 | 0.685559 |
| 695.5   | 718.5   | 0.978258 | -0.04744401  | 0.956059 |
| 1282    | 1294.5  | 0.958575 | -0.101385644 | 0.952633 |
| 845.5   | 740     | 0.762152 | -0.496045001 | 0.861964 |
| 983.5   | 1124    | 0.971138 | 0.072936688  | 0.949386 |
| 384     | 395.5   | 0.862525 | -0.332297068 | 0.842895 |
| 5665.5  | 5922.5  | 0.782845 | -0.387003535 | 0.74309  |
| 0.5     | 6.5     | 0.568955 | 2.321928095  | 0.291911 |
| 3464.5  | 3078.5  | 0.635991 | -0.554777555 | 0.75512  |
| 223     | 281.5   | 0.949921 | 0.093917863  | 0.855871 |
| 7120.55 | 7492.92 | 0.707936 | -0.5306937   | 0.662699 |
| 329.5   | 361     | 0.764119 | -0.350114185 | 0.667696 |
| 1198    | 1126    | 0.644393 | -0.522508619 | 0.709217 |
| 898     | 1122.5  | 0.885491 | -0.322731601 | 0.74814  |
| 464.5   | 415.5   | 0.722753 | -0.567213154 | 0.809392 |
| 1409.5  | 1272    | 0.259941 | -0.903504061 | 0.353521 |
| 233.5   | 408.499 | 0.730772 | -0.577259893 | 0.30435  |
| 471.5   | 408     | 0.882399 | -0.182409294 | 0.984161 |
| 379.5   | 334     | 0.738984 | -0.415671233 | 0.861117 |
| 3766    | 3848.56 | 0.773558 | -0.444194269 | 0.755719 |
| 1077.5  | 1150    | 0.695192 | -0.77083323  | 0.650372 |
| 131     | 160.5   | 0.943778 | 0.131483925  | 0.923622 |
| 252.5   | 207.5   | 0.79512  | -0.321928095 | 0.977295 |
| 1809.5  | 1934.5  | 0.732594 | -0.570484857 | 0.68045  |
| 1892.91 | 1773.76 | 0.760294 | -0.488886593 | 0.811029 |
| 103     | 228     | 0.972207 | -0.09404349  | 0.49987  |
| 2.5     | 4.5     | 0.670622 | 1            | 0.931084 |
| 83      | 73      | 0.713093 | -0.674599713 | 0.801954 |
| 971.5   | 941.5   | 0.706859 | -0.715835827 | 0.728528 |
| 75      | 78.5    | 0.741772 | 0.385891154  | 0.779347 |
| 2747.5  | 2730.5  | 0.833028 | -0.331807351 | 0.837946 |
| 1879    | 2070.5  | 0.886378 | -0.272586672 | 0.820577 |
| 1742.5  | 1799    | 0.718975 | -0.595766143 | 0.694052 |
| 2868    | 2385.5  | 0.992966 | -0.011362845 | 0.857402 |
| 48      | 52.5    | 0.797837 | -0.395137942 | 0.723082 |
| 715     | 659.5   | 0.79616  | -0.47337081  | 0.851503 |
| 448     | 511     | 0.949266 | -0.120854395 | 0.861442 |
| 1025    | 898.5   | 0.819376 | -0.304440668 | 0.935788 |
| 1968.5  | 2262    | 0.818498 | -0.397916564 | 0.712517 |
| 5344.23 | 5329.6  | 0.473661 | -0.725996883 | 0.47645  |
| 3510.05 | 3107.5  | 0.545711 | -0.886244079 | 0.645514 |
| 5076.5  | 4624.5  | 0.591531 | -0.675034263 | 0.679317 |
| 232     | 257     | 0.855267 | -0.288125387 | 0.772142 |
| 7046.5  | 6765    | 0.604237 | -0.553722169 | 0.648379 |
| 818     | 748     | 0.615768 | -0.622031151 | 0.701651 |
| 889     | 905     | 0.799119 | -0.38241168  | 0.78417  |
| 2318.53 | 2352.47 | 0.771525 | -0.524349701 | 0.761057 |
| 1569    | 1442.5  | 0.535386 | -0.53814628  | 0.640678 |
| 2870    | 2726    | 0.74682  | -0.581071972 | 0.783522 |
| 1286.49 | 1325.5  | 0.911121 | -0.187130238 | 0.88917  |
| 831     | 988.5   | 0.814987 | -0.467483486 | 0.696121 |
| 1109    | 908.5   | 0.642947 | -0.575884839 | 0.831828 |

|         |         |           |              |           |
|---------|---------|-----------|--------------|-----------|
| 1026    | 1062    | 0.226493  | -0.976291573 | 0.202532  |
| 559     | 496     | 0.549053  | -0.609035085 | 0.681392  |
| 910.999 | 885.995 | 0.826683  | -0.327483897 | 0.849637  |
| 354     | 361.5   | 0.899673  | -0.154722595 | 0.879002  |
| 4889.45 | 4917.6  | 0.718469  | -0.524994829 | 0.713515  |
| 39.5    | 63      | 0.255431  | -1.216317907 | 0.0642281 |
| 3454.97 | 3007.41 | 0.615436  | -0.608512589 | 0.750618  |
| 1942.5  | 2052    | 0.641165  | -0.711202498 | 0.595909  |
| 348.5   | 295     | 0.714438  | -0.422647033 | 0.883708  |
| 453     | 501.5   | 0.838503  | -0.347633809 | 0.760955  |
| 1010.5  | 999     | 0.684567  | -0.517329233 | 0.695544  |
| 6303    | 6188    | 0.775223  | -0.411456002 | 0.791131  |
| 139     | 131     | 0.646328  | -1           | 0.683433  |
| 2384    | 2530.5  | 0.765328  | -0.478544476 | 0.717343  |
| 1237.01 | 1328.01 | 0.891439  | -0.241988104 | 0.840629  |
| 1674.07 | 1957.55 | 0.689087  | -0.599391823 | 0.556064  |
| 288     | 255     | 0.859385  | -0.230345787 | 0.968323  |
| 58      | 91      | 0.881984  | 0.281570357  | 0.808306  |
| 605.501 | 525     | 0.643581  | -0.569556654 | 0.781222  |
| 764     | 724     | 0.646034  | -0.382671974 | 0.719677  |
| 566     | 572.5   | 0.723046  | -0.49899981  | 0.7129    |
| 528.5   | 669     | 0.908164  | -0.217623177 | 0.740413  |
| 772.004 | 927.489 | 0.839756  | -0.358830457 | 0.701539  |
| 3942    | 3899.5  | 0.757322  | -0.581124815 | 0.764846  |
| 410     | 365     | 0.78094   | -0.332966366 | 0.895977  |
| 6       | 8       | 0.905448  | -0.263034406 | 0.724378  |
| 192     | 226.5   | 0.638834  | -0.992505463 | 0.52988   |
| 951.503 | 1012.5  | 0.875958  | -0.205824578 | 0.817534  |
| 1955    | 1930    | 0.922042  | -0.168081301 | 0.931072  |
| 2.5     | 1       | 0.0714215 | #NUM!        | 0.353387  |
| 12      | 10      | 0.579687  | -0.678071905 | 0.753585  |
| 75      | 81      | 0.797294  | 0.532732542  | 0.832671  |
| 4176    | 3714    | 0.631687  | -0.980100443 | 0.707663  |
| 1617.5  | 1425    | 0.877253  | -0.234334094 | 0.97454   |
| 935     | 802     | 0.605673  | -0.863198006 | 0.720419  |
| 2481.5  | 2250    | 0.972821  | 0.044085779  | 0.891601  |
| 1918.5  | 1728.5  | 0.710747  | -0.520439873 | 0.801538  |
| 3242.01 | 3550.01 | 0.823792  | -0.376126615 | 0.753985  |
| 2463.5  | 2719.5  | 0.849779  | -0.401920675 | 0.787622  |
| 1314    | 1435    | 0.998718  | -0.00329759  | 0.947055  |
| 2944.5  | 3183    | 0.914154  | -0.216890845 | 0.86495   |
| 4447    | 4696.5  | 0.666582  | -0.847153661 | 0.629062  |
| 668     | 660     | 0.879063  | 0.288721049  | 0.872612  |
| 3388    | 3762    | 0.862645  | -0.33578047  | 0.791795  |
| 827.003 | 878.999 | 0.505888  | -1.176052856 | 0.463301  |
| 158.5   | 147     | 0.635492  | -0.907457887 | 0.687126  |
| 466     | 434.5   | 0.238156  | -1.564978126 | 0.278809  |
| 13307.5 | 12318.4 | 0.671501  | -0.477692871 | 0.752996  |
| 2674.46 | 2936.99 | 0.837735  | -0.339279074 | 0.764668  |
| 1243.5  | 1257    | 0.712497  | -0.619303522 | 0.704196  |
| 269     | 228     | 0.868354  | -0.296675303 | 0.976138  |
| 2789    | 2705.5  | 0.774542  | -0.411421073 | 0.800795  |
| 34.5    | 36.5    | 0.500245  | 1.350907162  | 0.51514   |
| 1922.5  | 1893    | 0.832348  | -0.347479938 | 0.844116  |
| 3981.5  | 3814.5  | 0.763968  | -0.449816174 | 0.79959   |
| 1083.8  | 988.463 | 0.753307  | -0.309790995 | 0.863165  |

|         |         |            |              |           |
|---------|---------|------------|--------------|-----------|
| 4508.5  | 4303.5  | 0.920629   | -0.145670455 | 0.958128  |
| 390     | 353     | 0.485413   | -1.412573459 | 0.549154  |
| 399.5   | 508.5   | 0.536892   | -1.442379348 | 0.392896  |
| 4645    | 5033    | 0.486025   | -1.231636171 | 0.430982  |
| 872.146 | 890.406 | 0.74316    | -0.520989608 | 0.726486  |
| 2.5     | 11      | 0.641229   | -2.321928095 | 0.0730972 |
| 2499.87 | 2391.13 | 0.585047   | -0.813211455 | 0.62166   |
| 3681.87 | 3463.05 | 0.792109   | -0.477170966 | 0.834865  |
| 1755.48 | 2397.97 | 0.875447   | -0.348787224 | 0.676071  |
| 2229.5  | 2652    | 0.809729   | -0.360953252 | 0.659141  |
| 732     | 1034    | 0.537593   | -1.485032702 | 0.337255  |
| 1045.5  | 1123    | 0.485076   | -2.229077447 | 0.448745  |
| 3023.01 | 3278    | 0.759158   | -0.667338761 | 0.707848  |
| 666.5   | 725.5   | 0.868461   | -0.322469342 | 0.811773  |
| 41.5    | 55      | 0.260554   | -1.517058436 | 0.129636  |
| 1023.5  | 1508.49 | 0.768412   | -0.611278102 | 0.500265  |
| 295     | 368.5   | 0.703207   | -0.560714954 | 0.510996  |
| 2372.5  | 2303    | 0.442176   | -0.534032414 | 0.482419  |
| 4186    | 4228.5  | 0.745588   | -0.492197785 | 0.737156  |
| 729     | 749.5   | 0.853028   | -0.261847491 | 0.828688  |
| 773     | 817     | 0.953033   | -0.103473727 | 0.914585  |
| 1023    | 1157    | 0.80747    | -0.468184093 | 0.721424  |
| 854.5   | 790     | 0.619356   | -0.686368631 | 0.688405  |
| 3.5     | 1       | 0.622002   | -0.807354922 | 0.739226  |
| 1902    | 1713.5  | 0.764555   | -0.605589151 | 0.830694  |
| 201.5   | 183     | 0.393392   | -1.288313814 | 0.462735  |
| 2.5     | 5       | 0.752429   | -1.321928095 | 0.424656  |
| 729.497 | 624.501 | 0.526235   | -1.471839246 | 0.618158  |
| 353.5   | 356.5   | 0.874097   | -0.239154212 | 0.867201  |
| 380     | 280.5   | 0.644094   | -1.00380157  | 0.822631  |
| 2.5     | 5.5     | 0.496665   | 1.765534746  | 0.725447  |
| 67.5    | 109     | 0.975631   | -0.076817851 | 0.698611  |
| 134     | 252.501 | 0.771753   | -0.936806174 | 0.432146  |
| 71      | 88      | 0.458436   | -1.564784619 | 0.331532  |
| 19      | 18.5    | 0.00925184 | -1.547487795 | 0.0103754 |
| 6961    | 5655.5  | 0.384153   | -1.217220354 | 0.544111  |
| 90      | 137     | 0.549925   | -1.08246216  | 0.273812  |
| 1025.5  | 1363    | 0.605427   | -1.081758921 | 0.419145  |
| 1629    | 1925.5  | 0.639858   | -0.811012789 | 0.513937  |
| 20.5    | 26      | 0.787586   | -0.357552005 | 0.559536  |
| 21      | 29      | 0.831277   | 0.362570079  | 0.943163  |
| 500.5   | 358     | 0.873702   | -0.222392421 | 0.874574  |
| 1470    | 1923.5  | 0.793698   | -0.551494549 | 0.612682  |
| 254.5   | 241.5   | 0.634483   | 0.715837286  | 0.609022  |
| 2955    | 3231    | 0.886833   | -0.231739533 | 0.817195  |
| 60.5    | 23.5    | 0.525901   | 0.739348245  | 0.264386  |
| 2151.51 | 2472    | 0.81677    | -0.424998181 | 0.715707  |
| 1360.5  | 1461    | 0.936436   | -0.156664661 | 0.891155  |
| 16287   | 17119.5 | 0.75046    | -0.464322848 | 0.707166  |
| 3794    | 3676.5  | 0.781548   | -0.450192502 | 0.805951  |
| 950.5   | 1091.5  | 0.837624   | -0.408727039 | 0.744315  |
| 808.5   | 794.5   | 0.676597   | -0.419505434 | 0.697037  |
| 1761.5  | 3970    | 0.90303    | 0.324628316  | 0.63558   |
| 469.5   | 463     | 0.854117   | -0.263952861 | 0.866011  |
| 430.196 | 259.883 | 0.306611   | -2.207601871 | 0.586063  |
| 4045.81 | 4369.11 | 0.749733   | -0.652214754 | 0.698544  |

|         |         |          |              |          |
|---------|---------|----------|--------------|----------|
| 572.5   | 509.5   | 0.968693 | -0.044787922 | 0.918791 |
| 1127    | 1402    | 0.926733 | -0.193559739 | 0.787912 |
| 3214    | 3444    | 0.878771 | -0.281102207 | 0.830763 |
| 853     | 861.5   | 0.879478 | -0.233570127 | 0.871549 |
| 1591.5  | 1545    | 0.52792  | -0.914217829 | 0.552187 |
| 1104.5  | 1077    | 0.721871 | -0.728716638 | 0.738309 |
| 2478    | 2450    | 0.75963  | -0.49319096  | 0.768586 |
| 1904.5  | 1714.5  | 0.743942 | -0.383443919 | 0.850646 |
| 1668.5  | 1752    | 0.704119 | -0.523805164 | 0.659869 |
| 1771.51 | 1919.99 | 0.748496 | -0.57281831  | 0.688854 |
| 5747    | 5503    | 0.705213 | -0.488241156 | 0.746286 |
| 296.5   | 1301    | 0.757233 | 0.959288503  | 0.44547  |
| 1807.5  | 1817.5  | 0.810034 | -0.443654543 | 0.806186 |
| 4542.42 | 4726.88 | 0.853526 | -0.325898056 | 0.824794 |
| 1300.5  | 1455.5  | 0.900852 | -0.231108518 | 0.822636 |
| 1376.5  | 1391.5  | 0.544735 | -0.660259986 | 0.53368  |
| 511.501 | 524.5   | 0.511886 | -0.973453688 | 0.492043 |
| 6225    | 5827    | 0.768549 | -0.442096379 | 0.822938 |
| 550     | 436.5   | 0.541871 | -0.635682258 | 0.791521 |
| 198     | 172     | 0.808165 | -0.362570079 | 0.920512 |
| 1       | 5       | 0.767557 | 1.321928095  | 0.627217 |
| 1783    | 1763.5  | 0.776632 | -0.368071141 | 0.787063 |
| 26.5    | 24.5    | 0.675095 | 0.664396968  | 0.637534 |
| 1021.5  | 1015    | 0.998642 | 0.002821898  | 0.994227 |
| 311.944 | 307.285 | 0.868046 | -0.240672626 | 0.880714 |
| 18302   | 17652   | 0.887335 | -0.235318694 | 0.913733 |
| 2248.05 | 2178.49 | 0.823531 | -0.359234983 | 0.847794 |
| 1945.5  | 2036    | 0.440191 | -0.752872807 | 0.395568 |
| 1462.01 | 1536.52 | 0.817708 | -0.420993535 | 0.782324 |
| 735.5   | 755.5   | 0.792989 | -0.535317519 | 0.775557 |
| 9404.5  | 8898    | 0.626656 | -0.570234376 | 0.682599 |
| 960     | 951     | 0.703636 | -0.431157165 | 0.713645 |
| 3.5     | 2.5     | 0.914417 | 0.192645078  | 0.749249 |
| 0       | 0.5     | 1        | #DIV/0!      | 0.308068 |
| 13.5    | 10      | 0.825249 | -0.231325546 | 0.868208 |
| 9.5     | 9.5     | 0.930418 | 0.144389909  | 0.930418 |
| 2324    | 2347    | 0.382735 | -0.508202085 | 0.369191 |
| 893     | 970.5   | 0.836945 | -0.333892322 | 0.770997 |
| 536     | 508.5   | 0.841537 | 0.247927513  | 0.799466 |
| 783     | 792     | 0.743536 | -0.530719456 | 0.734509 |
| 106     | 108.5   | 0.630022 | -0.809057217 | 0.612196 |
| 3272    | 2820.5  | 0.461823 | -0.568086119 | 0.66102  |
| 2979.01 | 3245.03 | 0.923585 | -0.204668686 | 0.872543 |
| 1638.5  | 1742    | 0.849908 | -0.403199485 | 0.812043 |
| 249     | 261     | 0.900706 | -0.221909672 | 0.867566 |
| 604     | 560     | 0.653008 | -0.966941711 | 0.700586 |
| 2249    | 2254    | 0.96356  | 0.064911062  | 0.965319 |
| 3158.04 | 2956.76 | 0.991417 | -0.014739357 | 0.954804 |
| 659.47  | 685.738 | 0.788392 | -0.497702225 | 0.760794 |
| 11663.7 | 11519.7 | 0.785416 | -0.377524165 | 0.796521 |
| 352.5   | 307.5   | 0.617246 | -0.417085328 | 0.802513 |
| 4161.83 | 4111.62 | 0.657367 | -0.582870257 | 0.668644 |
| 631.5   | 677     | 0.698981 | -0.635527382 | 0.644048 |
| 1192.01 | 1235    | 0.941986 | -0.117204953 | 0.9153   |
| 8563    | 6933.5  | 0.836317 | -0.198553965 | 0.920753 |
| 1184    | 1372    | 0.950125 | -0.127969928 | 0.857875 |



|         |         |          |              |          |
|---------|---------|----------|--------------|----------|
| 2985.06 | 3346.01 | 0.861472 | -0.336517689 | 0.783519 |
| 116.5   | 124.5   | 0.648403 | -0.909989834 | 0.603213 |
| 60      | 93.5    | 0.979504 | -0.0489096   | 0.654589 |
| 1111    | 1058    | 0.776092 | 0.391142061  | 0.743544 |
| 2600.5  | 2189    | 0.906374 | -0.110654114 | 0.893082 |
| 9       | 12.5    | 0.731149 | 0.784271309  | 0.872889 |
| 17.5    | 12.5    | 0.947512 | -0.129283017 | 0.878141 |
| 1277    | 1116.5  | 0.656062 | -0.434372291 | 0.815567 |
| 4875.97 | 5987.7  | 0.799954 | -0.491177727 | 0.654335 |
| 608.5   | 703     | 0.860202 | -0.330250215 | 0.758148 |
| 636     | 728     | 0.798144 | -0.448696811 | 0.69589  |
| 642.501 | 690.004 | 0.82821  | -0.416156909 | 0.779338 |
| 1394.99 | 1187.49 | 0.448187 | -1.883796641 | 0.538299 |
| 399.5   | 360.5   | 0.770044 | -0.578656612 | 0.836172 |
| 414.001 | 482.499 | 0.996158 | 0.008682243  | 0.898971 |
| 2530    | 2198.5  | 0.297567 | -0.920137919 | 0.430795 |
| 119.5   | 78.5    | 0.851882 | 0.170595555  | 0.502974 |
| 6       | 8       | 0.353387 | -1.584962501 | 0.198892 |
| 510     | 455.501 | 0.690355 | -0.612810486 | 0.781377 |
| 467     | 578.5   | 0.91694  | -0.203720635 | 0.770819 |
| 5847    | 5586.5  | 0.632859 | -1.214559135 | 0.658697 |
| 67      | 50      | 0.781175 | -0.271673324 | 0.893712 |
| 1293.5  | 1343.47 | 0.796434 | -0.475977433 | 0.769606 |
| 1037.5  | 1132.5  | 0.94281  | 0.13655511   | 0.995552 |
| 2060    | 1870.48 | 0.792974 | -0.313618059 | 0.889037 |
| 5255.5  | 5043.5  | 0.871795 | -0.295037938 | 0.899493 |
| 81      | 99.5    | 0.841485 | -0.397335498 | 0.699719 |
| 165.5   | 215     | 0.897012 | -0.200762405 | 0.673802 |
| 2233    | 2219    | 0.942332 | -0.130060541 | 0.946516 |
| 623.505 | 473.502 | 0.77151  | -0.551238607 | 0.94345  |
| 1086    | 1124.5  | 0.758295 | -0.437349961 | 0.727434 |
| 786     | 744.5   | 0.948822 | -0.114559764 | 0.984205 |
| 2157    | 2181.5  | 0.902408 | -0.249851721 | 0.895498 |
| 2388.5  | 2651.5  | 0.929221 | -0.170000506 | 0.859962 |
| 1892.05 | 1776.26 | 0.452102 | -0.732777908 | 0.518489 |
| 374.032 | 365.283 | 0.658293 | -0.728314299 | 0.676648 |
| 1204.26 | 1269.59 | 0.826509 | -0.401439869 | 0.78906  |
| 1785.5  | 1939.5  | 0.679297 | -0.557154025 | 0.603245 |
| 742     | 761     | 0.732675 | -0.492248093 | 0.710581 |
| 1667.49 | 1914.03 | 0.688467 | -0.484281771 | 0.550239 |
| 2       | 4       | 0.791627 | 0.584962501  | 0.791627 |
| 1131.5  | 1183    | 0.953475 | -0.098943817 | 0.921657 |
| 476.5   | 479     | 0.807732 | -0.436900785 | 0.803993 |
| 1870.5  | 1846.5  | 0.991089 | -0.019021413 | 0.999818 |
| 1009.5  | 1068    | 0.873557 | -0.282457669 | 0.83318  |
| 372     | 529.5   | 0.817021 | 0.422290883  | 0.954566 |
| 451.997 | 673     | 0.862479 | -0.377234182 | 0.597139 |
| 1130.5  | 1126.5  | 0.781921 | -0.435386145 | 0.784769 |
| 816     | 1005.5  | 0.874136 | -0.293046975 | 0.722525 |
| 490     | 424.498 | 0.866712 | -0.281994751 | 0.966838 |
| 561     | 601.5   | 0.984497 | 0.039319837  | 0.974999 |
| 2       | 6.5     | 0.865665 | -1           | 0.385812 |
| 675.5   | 784.5   | 0.828972 | -0.25006484  | 0.667663 |
| 5.5     | 1       | 0.409442 | -0.874469118 | 0.499897 |
| 495.001 | 487     | 0.628975 | -0.609212962 | 0.644504 |
| 791.5   | 707     | 0.410745 | -0.947207128 | 0.511946 |

|         |         |          |              |           |
|---------|---------|----------|--------------|-----------|
| 597.5   | 528     | 0.743937 | -0.415439981 | 0.860246  |
| 371.5   | 295     | 0.741463 | -0.413097089 | 0.954032  |
| 4914.77 | 6136.99 | 0.691439 | -0.966599922 | 0.556365  |
| 2044.5  | 2139.5  | 0.624341 | -1.074947945 | 0.59551   |
| 938.5   | 1113    | 0.677713 | -0.964319851 | 0.571405  |
| 731.495 | 747.502 | 0.644607 | -0.489561862 | 0.620732  |
| 1212.5  | 1250    | 0.804424 | -0.30786735  | 0.774186  |
| 286     | 79.5    | 0.196658 | 1.113924262  | 0.0750477 |
| 0       | 3       | 1        | #DIV/0!      | 0.308068  |
| 44      | 49      | 0.718326 | -0.7589919   | 0.647382  |
| 31      | 15      | 0.670737 | 0.521537121  | 0.380423  |
| 801     | 956.5   | 0.858859 | -0.382389232 | 0.746073  |
| 1069.55 | 967.494 | 0.569573 | -0.84037486  | 0.652012  |
| 1       | 1.5     | 1        | 0            | 0.756486  |
| 150     | 123.5   | 0.481967 | -1.251538767 | 0.616598  |
| 16.5    | 41      | 0.859885 | -0.520832163 | 0.339296  |
| 146     | 107     | 0.368659 | -1.019899557 | 0.651916  |
| 570.5   | 727.993 | 0.427443 | -1.640383238 | 0.288231  |
| 48      | 34.5    | 0.497151 | -1.337034987 | 0.708149  |
| 0       | 0       | ?        | #DIV/0!      | ?         |
| 3       | 1.5     | 0.534406 | -1.584962501 | 0.87225   |
| 981.5   | 1337.5  | 0.596568 | -0.863365308 | 0.364772  |
| 64      | 143.5   | 0.640016 | -1.607682577 | 0.23625   |
| 26      | 50.5    | 0.679493 | -1.308122295 | 0.324318  |
| 139     | 100     | 0.43009  | -2.286051059 | 0.597526  |
| 84.5    | 108     | 0.6163   | -1.567989422 | 0.486742  |
| 379.5   | 316     | 0.531822 | -1.329551336 | 0.645947  |
| 16.5    | 8       | 0.718656 | 0.570315725  | 0.474001  |
| 590.5   | 612     | 0.792838 | -0.521044629 | 0.768998  |
| 490     | 512.5   | 0.639585 | -1.075551033 | 0.611923  |
| 5       | 10      | 0.755048 | -1           | 0.380641  |
| 141     | 136     | 0.88744  | -0.214738849 | 0.916105  |
| 401.5   | 381     | 0.757698 | -0.461904104 | 0.801215  |
| 1034    | 1025    | 0.978819 | 0.043294407  | 0.972768  |
| 1065    | 1045    | 0.75163  | -0.52428179  | 0.766223  |
| 13      | 12      | 0.753525 | -0.452512205 | 0.821739  |
| 309.5   | 331     | 0.83616  | -0.259775129 | 0.769685  |
| 283.162 | 251.21  | 0.941209 | -0.127806875 | 0.980517  |
| 3.5     | 9       | 0.586031 | -2.807354922 | 0.183338  |
| 192.837 | 204.289 | 0.880309 | -0.243882467 | 0.835487  |
| 1250    | 1208    | 0.702904 | -0.51622291  | 0.734025  |
| 65.5    | 81      | 0.766277 | -0.607158247 | 0.620921  |
| 20152.9 | 17454.2 | 0.684219 | -0.424967368 | 0.844916  |
| 5661.5  | 5648    | 0.579822 | -0.886710059 | 0.581682  |
| 1269.5  | 1096.5  | 0.736749 | -0.600960867 | 0.839069  |
| 4678.5  | 4282.95 | 0.793401 | -0.383670565 | 0.866804  |
| 62      | 79.5    | 0.665696 | -1.071553261 | 0.515861  |
| 230.5   | 252.5   | 0.806804 | 0.190296049  | 0.936703  |
| 196     | 143.5   | 0.847536 | -0.270413936 | 0.91296   |
| 1059.5  | 1184    | 0.884467 | -0.277678403 | 0.808803  |
| 26      | 26.5    | 0.313217 | -1.308122295 | 0.300527  |
| 448.5   | 664     | 0.844988 | -0.50746798  | 0.615722  |
| 442     | 409     | 0.857818 | -0.270233171 | 0.919505  |
| 1382.5  | 1378    | 0.854294 | -0.311530248 | 0.856695  |
| 1571.49 | 1446    | 0.678376 | -0.619341049 | 0.747523  |
| 144     | 79.5    | 0.98822  | -0.020177882 | 0.650944  |

|         |         |          |              |           |
|---------|---------|----------|--------------|-----------|
| 1257.5  | 1004    | 0.823961 | -0.363389792 | 0.983124  |
| 670     | 556.5   | 0.813166 | 0.327944705  | 0.696816  |
| 29.5    | 25      | 0.63485  | 0.593090382  | 0.542668  |
| 600     | 552     | 0.539718 | -1.467267458 | 0.58868   |
| 3840.5  | 3567.46 | 0.792754 | -0.398540839 | 0.852476  |
| 1227    | 1389.5  | 0.751009 | -0.600032263 | 0.662103  |
| 1070.5  | 1251    | 0.958113 | 0.104603038  | 0.947987  |
| 3741.57 | 4362.48 | 0.920381 | -0.201819725 | 0.821102  |
| 243     | 150     | 0.307778 | -0.95326895  | 0.814812  |
| 1539    | 1594.5  | 0.749452 | -0.510961919 | 0.721014  |
| 1928.5  | 1923.97 | 0.523341 | -0.409934574 | 0.527006  |
| 435.498 | 448.5   | 0.891693 | -0.282702476 | 0.873743  |
| 998     | 978     | 0.685701 | -0.662543445 | 0.701504  |
| 1265.5  | 1112    | 0.879129 | -0.275514446 | 0.963263  |
| 614.5   | 620     | 0.577147 | -1.43990196  | 0.572072  |
| 195.5   | 158     | 0.528321 | -1.253472793 | 0.666489  |
| 433     | 444     | 0.986355 | -0.035415684 | 0.972067  |
| 1194    | 1266.5  | 0.848882 | -0.37845121  | 0.810177  |
| 121.5   | 164     | 0.764743 | -0.630191755 | 0.56124   |
| 900     | 1005.5  | 0.755918 | -0.514573173 | 0.668136  |
| 993.105 | 929.089 | 0.706481 | -0.450761068 | 0.773542  |
| 1030.5  | 939.501 | 0.74259  | -0.392579946 | 0.835254  |
| 842.5   | 882     | 0.940651 | -0.114906531 | 0.904526  |
| 706.496 | 706.999 | 0.88858  | -0.235718892 | 0.88806   |
| 237     | 269.5   | 0.888345 | -0.198745277 | 0.773151  |
| 449.5   | 474     | 0.992367 | 0.015959179  | 0.97024   |
| 218     | 196.5   | 0.200268 | -2.260389685 | 0.247432  |
| 4066.46 | 4305.98 | 0.820179 | -0.380378969 | 0.776188  |
| 21      | 20      | 0.774169 | 0.389042291  | 0.741231  |
| 1454    | 2161.5  | 0.857856 | -0.205458994 | 0.430003  |
| 1452    | 1465    | 0.97964  | 0.047401866  | 0.985096  |
| 2311    | 2426.5  | 0.829905 | -0.333523621 | 0.790076  |
| 14.5    | 10.5    | 0.852694 | -0.214124805 | 0.852694  |
| 1       | 2.5     | 0.698562 | 1            | 0.844837  |
| 420     | 433.5   | 0.834571 | -0.334867151 | 0.809619  |
| 780.501 | 819     | 0.305925 | -0.733275323 | 0.260417  |
| 785     | 761.5   | 0.870523 | -0.25460507  | 0.894236  |
| 1458.51 | 1608.49 | 0.847314 | -0.311233012 | 0.769363  |
| 26      | 13      | 0.337083 | -1.700439718 | 0.772264  |
| 1145    | 1101    | 0.623324 | -0.585592636 | 0.662335  |
| 1704.48 | 1790.16 | 0.393508 | -0.768307721 | 0.34614   |
| 350.499 | 382.5   | 0.914596 | -0.160940283 | 0.841901  |
| 68      | 43      | 0.434965 | -0.61172941  | 0.957854  |
| 897.498 | 961.002 | 0.934396 | -0.136450537 | 0.88341   |
| 134.124 | 116.037 | 0.522019 | -0.699381674 | 0.670971  |
| 617.876 | 728.963 | 0.539632 | -0.814194934 | 0.400188  |
| 6416    | 7052    | 0.826206 | -0.436634908 | 0.762895  |
| 1350    | 1321    | 0.69776  | -0.666576266 | 0.714081  |
| 2787.5  | 2816.5  | 0.757885 | -0.42273512  | 0.748478  |
| 1917.55 | 2013    | 0.915159 | -0.191206631 | 0.881472  |
| 975.5   | 822     | 0.482777 | -0.68920673  | 0.671764  |
| 1470    | 1576    | 0.80857  | -0.327459201 | 0.743821  |
| 1389    | 1383    | 0.743578 | -0.394071223 | 0.747966  |
| 767.5   | 902.5   | 0.150873 | -0.650332285 | 0.0651979 |
| 4277.03 | 3969.26 | 0.65738  | -0.710537847 | 0.716075  |
| 1721.5  | 1706.5  | 0.572532 | -0.693490231 | 0.580834  |

|         |         |          |              |          |
|---------|---------|----------|--------------|----------|
| 453     | 405     | 0.69973  | 0.528676186  | 0.635129 |
| 2772.57 | 2702.43 | 0.847476 | -0.284374739 | 0.868712 |
| 5019    | 3736.5  | 0.593512 | -0.989118168 | 0.79155  |
| 282.999 | 255.5   | 1        | 0            | 0.926077 |
| 1389.98 | 1587.97 | 0.881257 | -0.272815681 | 0.785985 |
| 2687.5  | 2528.5  | 0.839644 | -0.289417151 | 0.891207 |
| 524.5   | 561.5   | 0.748288 | -0.627531198 | 0.701383 |
| 143.5   | 97.5    | 0.565313 | -1.258016331 | 0.791186 |
| 2802.46 | 3069.5  | 0.900825 | -0.228494486 | 0.837441 |
| 1673.5  | 1423    | 0.616193 | -0.85300567  | 0.735674 |
| 2510.02 | 3304.5  | 0.826276 | -0.500684718 | 0.65292  |
| 709.5   | 728     | 0.659216 | -0.828607181 | 0.641013 |
| 149.5   | 157     | 0.538184 | -1.147186077 | 0.504441 |
| 2334.25 | 1777.43 | 0.405044 | -1.735320446 | 0.569382 |
| 851     | 820.5   | 0.823725 | -0.397624967 | 0.849418 |
| 4602.57 | 4249.59 | 0.854859 | -0.290544872 | 0.915393 |
| 628     | 581.5   | 0.819684 | -0.36536234  | 0.878458 |
| 416.5   | 373.5   | 0.85002  | -0.353444531 | 0.920747 |
| 7.5     | 6       | 0.506949 | -1.099535674 | 0.670622 |
| 258.5   | 285     | 0.891089 | -0.262476411 | 0.825341 |
| 88      | 91.5    | 0.942178 | 0.125530882  | 0.967444 |
| 143.5   | 158     | 0.970424 | 0.063911764  | 0.963605 |
| 2338.51 | 2372.51 | 0.763392 | -0.44948561  | 0.751186 |
| 1795    | 1552.5  | 0.794459 | -0.406756105 | 0.90617  |
| 2731    | 1319    | 0.289593 | -1.794993773 | 0.748695 |
| 879.5   | 732     | 0.640635 | -0.669404097 | 0.795138 |
| 5032.5  | 4554.5  | 0.735972 | -0.50487932  | 0.818045 |
| 1143.5  | 1036.51 | 0.814153 | -0.401855642 | 0.884652 |
| 722     | 679     | 0.717518 | -0.554807421 | 0.767598 |
| 0.5     | 0       | 1        | 0            | 0.450185 |
| 203     | 211     | 0.790682 | -0.572578776 | 0.766578 |
| 1578.5  | 1454.5  | 0.790344 | -0.388324353 | 0.858705 |
| 2800.48 | 2534.98 | 0.571146 | -0.711256021 | 0.664347 |
| 1392    | 1369    | 0.785682 | -0.450713231 | 0.798422 |
| 336     | 334.501 | 0.96626  | -0.079434467 | 0.969068 |
| 965     | 1011.5  | 0.812962 | -0.414539245 | 0.778226 |
| 1707.53 | 1605.5  | 0.757074 | -0.505874032 | 0.804408 |
| 0.5     | 0       | 0.308068 | #NUM!        | 1        |
| 0.5     | 0.5     | 0.450185 | #NUM!        | 0.450185 |
| 1340.5  | 1215.49 | 0.663408 | -0.559628849 | 0.755252 |
| 1593    | 1656.5  | 0.7951   | -0.450178478 | 0.765925 |
| 0.5     | 1.5     | 0.468351 | 2.321928095  | 0.706667 |
| 2295    | 2165    | 0.692073 | -0.556023616 | 0.743326 |
| 1308    | 1339    | 0.880572 | -0.269002815 | 0.864171 |
| 3256.49 | 3274.47 | 0.828577 | -0.329268776 | 0.824056 |
| 2000    | 2153    | 0.708779 | -0.472929664 | 0.636973 |
| 147.5   | 137     | 0.894329 | -0.23878686  | 0.943456 |
| 986.5   | 957     | 0.849848 | -0.333306743 | 0.871292 |
| 2566    | 2207    | 0.587975 | -0.536994951 | 0.761348 |
| 707     | 751.5   | 0.952091 | -0.08510534  | 0.899772 |
| 738     | 652.5   | 0.87981  | -0.2819243   | 0.958035 |
| 788.5   | 857.5   | 0.849803 | -0.356180404 | 0.79158  |
| 5971.5  | 6079    | 0.580459 | -0.715741173 | 0.56418  |
| 212.5   | 213.5   | 0.820251 | -0.251538767 | 0.815112 |
| 2055.5  | 2129.5  | 0.898918 | -0.195505528 | 0.870557 |
| 805.5   | 777     | 0.432287 | -0.801991737 | 0.467566 |

|         |         |          |              |          |
|---------|---------|----------|--------------|----------|
| 701.5   | 680.5   | 0.929068 | -0.143686512 | 0.951414 |
| 3510.5  | 3153    | 0.545368 | -0.657547027 | 0.657291 |
| 534     | 633     | 0.791027 | -0.548943278 | 0.677352 |
| 3714.5  | 3480.5  | 0.436182 | -0.7293473   | 0.505667 |
| 4523.48 | 4471.03 | 0.791177 | -0.53522598  | 0.798721 |
| 1297.49 | 1463.5  | 0.937037 | -0.167193674 | 0.86424  |
| 7       | 12.5    | 1        | 0            | 0.543587 |
| 88.5    | 82      | 0.635485 | -1.024662054 | 0.683396 |
| 1130.5  | 1232.02 | 0.91658  | -0.198758039 | 0.85913  |
| 1104.5  | 1215.5  | 0.884468 | -0.281041219 | 0.82031  |
| 1297    | 1162    | 0.613479 | -0.689911073 | 0.710663 |
| 5927.5  | 5332.5  | 0.140491 | -0.675421389 | 0.241234 |
| 75.5    | 101.5   | 0.575484 | 0.65033851   | 0.820394 |
| 3510    | 4912    | 0.913037 | 0.21497495   | 0.871272 |
| 998     | 1389    | 0.995287 | 0.012235452  | 0.791755 |
| 88      | 102.5   | 0.990814 | 0.024384159  | 0.920593 |
| 490.999 | 220     | 0.648963 | -0.767153768 | 0.875484 |
| 880.499 | 264     | 0.957307 | -0.073943753 | 0.504392 |
| 0.5     | 0.5     | 1        | 0            | 1        |
| 0       | 0       | ?        | #DIV/0!      | ?        |
| 1715    | 1974    | 0.934588 | -0.151068705 | 0.836755 |
| 200.5   | 162.5   | 0.693475 | -0.581369236 | 0.864249 |
| 3388.5  | 3545    | 0.708529 | -0.501223619 | 0.666641 |
| 3197.5  | 3487    | 0.477628 | -0.629754995 | 0.38431  |
| 671.5   | 790.5   | 0.384748 | -0.500979312 | 0.201902 |
| 500.5   | 470     | 0.575601 | -0.536773707 | 0.649343 |
| 1696.5  | 1919.03 | 0.925551 | -0.171810921 | 0.839917 |
| 378     | 432     | 0.890024 | -0.249359469 | 0.793716 |
| 774     | 769     | 0.834074 | -0.331747156 | 0.839179 |
| 4700.5  | 4526.5  | 0.380602 | -0.82220176  | 0.4174   |
| 53      | 52      | 0.902162 | 0.226275856  | 0.891392 |
| 833.5   | 918.5   | 0.813404 | -0.338903734 | 0.727235 |
| 1039    | 1090.5  | 0.845754 | -0.29476178  | 0.805539 |
| 217.5   | 227.5   | 0.928975 | -0.150161747 | 0.896187 |
| 461.001 | 459.001 | 0.839371 | -0.356772974 | 0.842486 |
| 30.5    | 36.5    | 0.5952   | -1.023846742 | 0.471382 |
| 1607    | 1697.5  | 0.712117 | -0.4437503   | 0.656424 |
| 45321   | 38338.5 | 0.46059  | -0.505041244 | 0.713414 |
| 25914.9 | 19191   | 0.604615 | -0.466637339 | 0.9741   |
| 30708.5 | 27053.5 | 0.255543 | -0.743919754 | 0.396152 |
| 57714.5 | 51261.5 | 0.385446 | -0.578390756 | 0.550579 |
| 33746.2 | 27931.4 | 0.354151 | -0.69407581  | 0.590759 |
| 54268.1 | 48244.4 | 0.601204 | -0.380499925 | 0.781322 |
| 38314.3 | 40160.1 | 0.636754 | -0.317399758 | 0.561256 |
| 51177.7 | 43132.4 | 0.421473 | -0.692926968 | 0.623042 |
| 26462.5 | 21455.5 | 0.482914 | -0.483884779 | 0.805854 |
| 19590.6 | 16147.6 | 0.307007 | -0.545852166 | 0.624947 |
| 5604.5  | 5219    | 0.653304 | -0.521632617 | 0.726337 |
| 51049   | 39838   | 0.166568 | -0.679366839 | 0.505051 |
| 34487   | 28319   | 0.437223 | -0.580597561 | 0.708424 |
| 23907   | 18884.5 | 0.538853 | -0.584419488 | 0.814908 |
| 52461.9 | 47234.6 | 0.581751 | -0.383887952 | 0.747423 |
| 40633.2 | 42663.1 | 0.166753 | -0.615110444 | 0.129131 |
| 29503   | 28623.5 | 0.556233 | -0.504659666 | 0.594552 |
| 19017.5 | 11412   | 0.505116 | -0.522315522 | 0.826465 |
| 22348.8 | 19784.6 | 0.597218 | -0.435678059 | 0.763247 |

|         |         |          |              |          |
|---------|---------|----------|--------------|----------|
| 35745.5 | 26751   | 0.267832 | -0.58461948  | 0.761621 |
| 42088.8 | 35252.7 | 0.219269 | -0.620640655 | 0.467855 |
| 36841.5 | 37527   | 0.341154 | -0.467060938 | 0.314734 |
| 13140.5 | 10810   | 0.593396 | -0.404003459 | 0.880805 |
| 41985.5 | 35295.5 | 0.511843 | -0.380927558 | 0.831079 |
| 41219.6 | 24161.6 | 0.353884 | -0.620602336 | 0.853534 |
| 29832   | 17629.5 | 0.24558  | -0.8499859   | 0.914283 |
| 23455.5 | 20584.8 | 0.810185 | -0.279338399 | 0.94136  |
| 4.50003 | 6       | 0.829517 | 0.415047117  | 0.99999  |
| 79211.2 | 77877.7 | 0.688658 | -0.43338393  | 0.707372 |
| 46045.8 | 37509.2 | 0.720388 | -0.267161053 | 0.972053 |
| 37906.8 | 32655   | 0.51883  | -0.483503846 | 0.733107 |
| 44049.5 | 39879.4 | 0.757615 | -0.334535099 | 0.866173 |
| 68264.7 | 65877.8 | 0.623733 | -0.445974992 | 0.668352 |
| 4894.5  | 4365    | 0.641336 | -0.505820189 | 0.764889 |
| 97098.5 | 90882   | 0.61112  | -0.416719917 | 0.701856 |
| 27381.5 | 23968.5 | 0.699731 | -0.356514575 | 0.866549 |
| 82305.5 | 89135.5 | 0.37937  | -0.58430095  | 0.28907  |
| 76220.5 | 63742.5 | 0.189375 | -0.637088207 | 0.427369 |
| 17342   | 14451   | 0.411091 | -0.574311892 | 0.671048 |
| 13292.5 | 13431.5 | 0.888272 | -0.2094805   | 0.879726 |
| 10094   | 10643.8 | 0.777862 | -0.451388943 | 0.735236 |
| 251     | 225     | 0.747392 | -0.331298618 | 0.872355 |
| 13      | 22      | 0.746812 | -0.793549123 | 0.419618 |
| 635     | 656     | 0.736075 | -0.4888388   | 0.707756 |
| 312.5   | 336.5   | 0.89917  | -0.173970214 | 0.83227  |
| 502.5   | 529.5   | 0.749691 | -0.414559073 | 0.699543 |
| 1209    | 1263    | 0.848944 | -0.359245129 | 0.819095 |
| 4345.5  | 4325    | 0.830172 | -0.276945555 | 0.834654 |
| 5.6031  | 10.5    | 0.928723 | -0.097063211 | 0.255391 |
| 65477.5 | 51562   | 0.257235 | -0.638516089 | 0.610853 |
| 65371   | 49650.5 | 0.427484 | -0.46230349  | 0.917539 |
| 19532.7 | 14798.9 | 0.381188 | -0.622574535 | 0.772759 |
| 52542.3 | 45370.8 | 0.599099 | -0.381797666 | 0.824395 |
| 48739.7 | 48743.6 | 0.499914 | -0.419420015 | 0.499788 |
| 37634   | 29409   | 0.79729  | -0.216577254 | 0.883543 |
| 33715.5 | 24273.5 | 0.640398 | -0.326181292 | 0.855139 |
| 31698.7 | 24780.5 | 0.340517 | -0.529880712 | 0.764605 |
| 1668.01 | 1787.5  | 0.583409 | -0.44652438  | 0.493517 |
| 77473   | 77537   | 0.369538 | -0.655871241 | 0.368606 |
| 27829   | 21977   | 0.540781 | -0.499858847 | 0.858584 |
| 13333   | 11652.5 | 0.558638 | -0.450565831 | 0.750982 |
| 30507.5 | 23419   | 0.67808  | -0.330049296 | 0.954166 |
| 30642   | 22184.5 | 0.427817 | -0.523709096 | 0.937355 |
| 49488.4 | 49136.7 | 0.247614 | -0.669099998 | 0.254838 |
| 39842.6 | 46141   | 0.368673 | -0.570631443 | 0.215258 |
| 44580.5 | 40651.5 | 0.277782 | -0.477169179 | 0.430538 |
| 68019.2 | 63143.3 | 0.392049 | -0.548739245 | 0.496623 |
| 76518.5 | 61869.5 | 0.426616 | -0.585353778 | 0.722068 |
| 73528.1 | 72761.1 | 0.508902 | -0.463851637 | 0.523895 |
| 95959.9 | 72123.8 | 0.337365 | -0.563046599 | 0.809255 |
| 455     | 457.5   | 0.561829 | -1.353989304 | 0.558522 |
| 1548    | 1744    | 0.795595 | -0.542263875 | 0.717699 |
| 587.5   | 628     | 0.858169 | -0.340464046 | 0.81284  |
| 618.5   | 658     | 0.903975 | -0.247490223 | 0.865569 |
| 1204.5  | 1247    | 0.863477 | -0.297580739 | 0.838147 |

|         |         |          |              |           |
|---------|---------|----------|--------------|-----------|
| 1103    | 972.5   | 0.67923  | -0.475130663 | 0.808976  |
| 2053.5  | 1796.5  | 0.695177 | -0.696668423 | 0.790316  |
| 1949.46 | 1598.49 | 0.567767 | -0.934505401 | 0.717094  |
| 24088   | 19109   | 0.744438 | -0.328035083 | 0.995709  |
| 84908.5 | 76777.5 | 0.552161 | -0.470104287 | 0.691202  |
| 86464.8 | 85985.8 | 0.583293 | -0.49574582  | 0.5901    |
| 2081.5  | 2257.5  | 0.811432 | -0.479892627 | 0.757524  |
| 344.268 | 350.573 | 0.760589 | -0.470495253 | 0.745654  |
| 894.5   | 850.5   | 0.673992 | -0.524166902 | 0.722972  |
| 7158.5  | 7044.16 | 0.767259 | -0.434923099 | 0.780957  |
| 47.5    | 62.5    | 0.607645 | -0.788495895 | 0.390918  |
| 2371.03 | 2080.47 | 0.837621 | -0.275389155 | 0.951651  |
| 1839.5  | 1978.5  | 0.827625 | -0.417261358 | 0.777646  |
| 502.5   | 651     | 0.899848 | -0.255303363 | 0.725189  |
| 2273.5  | 1522    | 0.958249 | -0.0609178   | 0.717559  |
| 1722.51 | 1603    | 0.882524 | -0.236075734 | 0.936262  |
| 1686.88 | 1644.05 | 0.943705 | 0.13625277   | 0.929325  |
| 9.5     | 10.5    | 0.52984  | -1.078002512 | 0.457806  |
| 10757   | 11443   | 0.839024 | -0.301387491 | 0.786373  |
| 3517.5  | 3840.5  | 0.682272 | -0.571185998 | 0.603609  |
| 692     | 716.5   | 0.958498 | -0.09033232  | 0.934359  |
| 905     | 977.5   | 0.80013  | -0.444563452 | 0.742695  |
| 236     | 246.5   | 0.574559 | -0.5880223   | 0.528128  |
| 5666    | 6016.5  | 0.801373 | -0.367781067 | 0.749317  |
| 623.5   | 439     | 0.491497 | -0.697405962 | 0.869909  |
| 1660.98 | 1967    | 0.900434 | -0.243015917 | 0.78541   |
| 1454.5  | 1387    | 0.487911 | -0.6901239   | 0.538491  |
| 2180.5  | 2029.5  | 0.676898 | -0.475273461 | 0.751917  |
| 5       | 8.5     | 0.517592 | -1.321928095 | 0.211303  |
| 0.5     | 0.5     | 0.651448 | 1            | 0.651448  |
| 853     | 801.5   | 0.884273 | -0.227616769 | 0.931897  |
| 797     | 784.5   | 0.871029 | -0.303045559 | 0.881576  |
| 22.8768 | 35.0711 | 0.467026 | -0.694215379 | 0.140651  |
| 3.62096 | 10.9222 | 0.523843 | -0.961108401 | 0.0342223 |
| 1222    | 1203.5  | 0.886383 | -0.223671974 | 0.898252  |
| 1245.5  | 996.5   | 0.592873 | -0.577741067 | 0.829262  |
| 17      | 20      | 0.922385 | -0.133266531 | 0.771654  |
| 216     | 208.5   | 0.901677 | -0.177458674 | 0.931034  |
| 97      | 94      | 0.715443 | 0.508611615  | 0.696169  |
| 181     | 158     | 0.739929 | 0.379737363  | 0.640383  |
| 43.5    | 86      | 0.73757  | -1.23349013  | 0.394099  |
| 141.5   | 112     | 0.946767 | -0.089375807 | 0.869259  |
| 211     | 227.001 | 0.528026 | 0.889929298  | 0.562936  |
| 10      | 14      | 0.84064  | -0.321928095 | 0.557935  |
| 1292.5  | 1325    | 0.918862 | -0.179865489 | 0.901583  |
| 1048.5  | 939     | 0.69081  | -0.489146713 | 0.79829   |
| 2549.5  | 2175    | 0.721726 | -0.479948268 | 0.862743  |
| 1517.5  | 1467.5  | 0.732712 | -0.422185466 | 0.765736  |
| 10      | 11.5    | 0.823528 | 0.321928095  | 0.928638  |
| 1602    | 1500    | 0.749515 | -0.411439754 | 0.81159   |
| 47.8792 | 41.548  | 0.962716 | 0.065100523  | 0.857041  |
| 530.498 | 599.998 | 0.953738 | -0.11015296  | 0.872049  |
| 3810.52 | 4003.09 | 0.810929 | -0.448936995 | 0.776561  |
| 344     | 380     | 0.864106 | -0.354802392 | 0.800677  |
| 15383.4 | 11859.7 | 0.233801 | -1.628449383 | 0.397941  |
| 15158.4 | 16108.6 | 0.627407 | -0.877126937 | 0.583218  |

|         |         |          |              |          |
|---------|---------|----------|--------------|----------|
| 971     | 828.5   | 0.647016 | -0.603655364 | 0.791096 |
| 128.5   | 129.5   | 0.82616  | 0.399516914  | 0.830298 |
| 2.5     | 4       | 1        | 0            | 0.753462 |
| 996.5   | 972.5   | 0.266644 | -1.585686563 | 0.280841 |
| 352.5   | 430     | 0.91333  | -0.237477773 | 0.79099  |
| 1229.28 | 1125.58 | 0.825728 | -0.320205384 | 0.898734 |
| 452.999 | 435.5   | 0.631161 | -0.82054904  | 0.660709 |
| 3577    | 3066    | 0.495155 | -1.294264732 | 0.59812  |
| 1259.5  | 1201    | 0.648837 | -0.641316957 | 0.690407 |
| 780.002 | 751     | 0.638161 | -0.886234824 | 0.664611 |
| 818.49  | 534.496 | 0.474833 | -1.94211136  | 0.69448  |
| 801.494 | 1167.52 | 0.660658 | -1.437094545 | 0.464117 |
| 22      | 15      | 0.590082 | 0.966833136  | 0.481382 |
| 9.5     | 20.5    | 0.976297 | 0.074000581  | 0.546768 |
| 1299    | 1134.5  | 0.582971 | -0.876599378 | 0.687875 |
| 4874    | 3618.5  | 0.429196 | -2.011888778 | 0.591179 |
| 3018    | 2942    | 0.669986 | -0.50003263  | 0.696081 |
| 1017    | 1008.5  | 0.798633 | -0.330108071 | 0.806603 |
| 188.5   | 205     | 0.769348 | -0.492331523 | 0.704037 |
| 345.942 | 341.493 | 0.779084 | -0.329179741 | 0.792499 |
| 216     | 232     | 0.945361 | -0.118262882 | 0.894296 |
| 719.5   | 685.5   | 0.699715 | -0.489442682 | 0.746154 |
| 84.5    | 138     | 0.780231 | -0.800966594 | 0.503289 |
| 22      | 22      | 0.659835 | -0.7589919   | 0.659835 |
| 35.5    | 49.5    | 0.950894 | -0.14974712  | 0.760132 |
| 1018.24 | 1209.23 | 0.364445 | -1.402330624 | 0.259213 |
| 472     | 456     | 0.813493 | -0.421163602 | 0.837882 |
| 2061    | 2055.5  | 0.951515 | -0.094369951 | 0.953555 |
| 797     | 692     | 0.582946 | -1.400031175 | 0.661937 |
| 65.4999 | 77      | 0.980135 | -0.056143165 | 0.889298 |
| 4906.5  | 2789.5  | 0.862658 | -0.096671653 | 0.364885 |
| 181.5   | 133     | 0.565354 | -0.318950395 | 0.837391 |
| 2448    | 1709    | 0.401345 | -0.305010591 | 0.608745 |
| 41      | 27.5    | 0.562066 | -0.772589504 | 0.902025 |
| 0       | 0       | ?        | #DIV/0!      | ?        |
| 151     | 170     | 0.744552 | -0.722704901 | 0.669555 |
| 18      | 16      | 0.368573 | -1           | 0.471729 |
| 465.5   | 547.5   | 0.987493 | -0.026587003 | 0.867791 |
| 804     | 860     | 0.82431  | -0.403124178 | 0.775971 |
| 3986    | 5266    | 0.726988 | -0.969558489 | 0.57056  |
| 20      | 21      | 0.76418  | -0.678071905 | 0.734473 |
| 5539.46 | 4740.51 | 0.879982 | 0.253714921  | 0.792483 |
| 8056.75 | 9577.92 | 0.889953 | -0.306432811 | 0.784527 |
| 1373.02 | 1205.51 | 0.970683 | 0.059691195  | 0.886582 |
| 41.5    | 38      | 0.39925  | -1.468148836 | 0.457407 |
| 3987.96 | 2420.99 | 0.517358 | -1.09878237  | 0.859737 |
| 177.5   | 210     | 0.983957 | -0.041222663 | 0.880379 |
| 307     | 304     | 0.945705 | -0.107276736 | 0.953095 |
| 40.5    | 37      | 0.959288 | 0.069540933  | 0.88854  |
| 1.5     | 21      | 0.978598 | -0.584962501 | 0.328311 |
| 1635.5  | 1873    | 0.789039 | -0.539806758 | 0.697237 |
| 13.5    | 9.5     | 0.381954 | -3.169925001 | 0.544496 |
| 4.5     | 2       | 0.935963 | 0.152003093  | 0.636801 |
| 302.5   | 363     | 0.758873 | -0.615082489 | 0.632899 |
| 819     | 873.5   | 0.854755 | -0.319068441 | 0.807352 |
| 3348    | 3196.5  | 0.628521 | -0.689840596 | 0.66844  |



|         |         |          |              |           |
|---------|---------|----------|--------------|-----------|
| 9       | 19      | 1        | 0            | 0.428621  |
| 5658.14 | 5455.53 | 0.784631 | -0.455615522 | 0.812219  |
| 11418.5 | 9787    | 0.144594 | -0.72513758  | 0.299203  |
| 461.236 | 413.212 | 0.736668 | -0.418908759 | 0.842475  |
| 1143.5  | 1076    | 0.556629 | -0.63862197  | 0.620173  |
| 517.264 | 568.288 | 0.888103 | -0.248228069 | 0.819792  |
| 6509    | 6611    | 0.632946 | -0.471157123 | 0.614807  |
| 1242.5  | 1254    | 0.727719 | -0.46926683  | 0.719229  |
| 1430    | 1409.5  | 0.842206 | -0.280900827 | 0.854759  |
| 1215    | 883.5   | 0.480032 | -1.39031507  | 0.683538  |
| 3818.44 | 3553.01 | 0.738412 | -0.440571242 | 0.804961  |
| 2881.52 | 3058.49 | 0.773348 | -0.474421095 | 0.726497  |
| 1422.5  | 1698    | 0.887391 | -0.310563261 | 0.778238  |
| 26      | 23      | 0.461168 | -1.2410081   | 0.548407  |
| 871     | 894.5   | 0.802179 | -0.384985957 | 0.780256  |
| 2194    | 1814.5  | 0.632642 | -0.43890616  | 0.868186  |
| 799.5   | 687     | 0.971631 | -0.055176707 | 0.922153  |
| 44.5    | 43      | 0.976152 | -0.049468676 | 1         |
| 3203    | 3211.5  | 0.77902  | -0.399655377 | 0.776695  |
| 1412    | 1430    | 0.546471 | -0.610214818 | 0.532758  |
| 1594    | 1618.5  | 0.828159 | -0.312568333 | 0.81497   |
| 10927   | 10755   | 0.800058 | -0.472453939 | 0.810986  |
| 1412.51 | 1657.51 | 0.889309 | -0.306698431 | 0.791804  |
| 1505.5  | 1390.5  | 0.485398 | -1.310474286 | 0.538667  |
| 0.5     | 1       | 1        | 0            | 0.651448  |
| 2900.5  | 2984.5  | 0.850638 | -0.334354163 | 0.830195  |
| 1070.5  | 1006.5  | 0.996181 | -0.008786645 | 0.966235  |
| 1784    | 1873.5  | 0.623523 | -0.745617464 | 0.583221  |
| 1805    | 2039.5  | 0.919563 | -0.19893882  | 0.839725  |
| 1990.05 | 1960.45 | 0.76584  | -0.534401675 | 0.776617  |
| 1513.5  | 1741.5  | 0.910366 | -0.227724395 | 0.819751  |
| 579.5   | 699.5   | 0.913216 | -0.22883814  | 0.793762  |
| 1332.5  | 1234    | 0.793964 | -0.3700912   | 0.859928  |
| 2764    | 2799    | 0.778578 | -0.400151732 | 0.767509  |
| 893.5   | 949.5   | 0.778017 | -0.478018464 | 0.731383  |
| 2500.5  | 2337    | 0.576098 | -0.820904856 | 0.632163  |
| 7521.73 | 7237.94 | 0.709535 | -0.698485844 | 0.736358  |
| 4874    | 3009    | 0.912164 | -0.149899752 | 0.752931  |
| 68      | 164.5   | 0.500939 | -1.387023123 | 0.0864565 |
| 632.5   | 650.5   | 0.531736 | -1.076102979 | 0.511409  |
| 1663    | 1645.5  | 0.806059 | -0.346977222 | 0.81533   |
| 346     | 390     | 0.652405 | -0.983417116 | 0.575285  |
| 844.5   | 1105.5  | 0.896348 | -0.250278398 | 0.70507   |
| 0.5     | 0       | 1        | 0            | 0.450185  |
| 6.5     | 7       | 0.564258 | -1.378511623 | 0.519918  |
| 42      | 27.5    | 0.78827  | -0.392317423 | 0.903284  |
| 10.5    | 9       | 0.288799 | -2.807354922 | 0.362508  |
| 10      | 11      | 0.535489 | -1           | 0.463813  |
| 6.5     | 2.5     | 0.57998  | -0.700439718 | 0.735184  |
| 1       | 1.5     | 0.724378 | -1           | 0.495025  |
| 5.5     | 6       | 1        | 0            | 0.9402    |
| 0       | 0       | ?        | #DIV/0!      | ?         |
| 0       | 2.5     | 0.680109 | #DIV/0!      | 0.544016  |
| 2.5     | 0       | 1        | 0            | 0.31594   |
| 39      | 45      | 0.947701 | 0.140862536  | 0.973829  |
| 7.5     | 9       | 0.922273 | -0.206450877 | 0.808175  |

|         |         |          |              |          |
|---------|---------|----------|--------------|----------|
| 5373    | 5525    | 0.744577 | -0.511737445 | 0.72187  |
| 837.502 | 899.001 | 0.573484 | -1.379031947 | 0.531608 |
| 9434    | 9106.5  | 0.673864 | -0.59090055  | 0.704982 |
| 1215    | 1276.5  | 0.909958 | -0.171261449 | 0.869722 |
| 883.5   | 696.5   | 0.5078   | -1.281274771 | 0.663936 |
| 9217.5  | 8866.5  | 0.44219  | -1.831144928 | 0.464325 |
| 1551    | 1221    | 0.212971 | -1.461991859 | 0.370827 |
| 0       | 0       | ?        | #DIV/0!      | ?        |
| 217.5   | 181.5   | 0.270083 | -3.009984089 | 0.35386  |
| 2191    | 2309.56 | 0.419539 | -1.120093845 | 0.38008  |
| 295.5   | 403.499 | 0.980022 | -0.042107394 | 0.73425  |
| 380.358 | 373.193 | 0.999733 | -0.000572856 | 0.987597 |
| 1078.5  | 1108.5  | 0.709045 | -0.450015005 | 0.681284 |
| 1361    | 1229    | 0.595237 | -0.88786982  | 0.672054 |
| 437     | 407.5   | 0.958685 | 0.081820086  | 0.911116 |
| 19.5    | 16.5    | 0.759841 | -0.584962501 | 0.868438 |
| 412.633 | 356.683 | 0.606617 | -1.28700814  | 0.688694 |
| 897.391 | 776.376 | 0.583049 | -1.332976296 | 0.666496 |
| 100     | 90      | 0.9638   | -0.066427362 | 0.955768 |
| 2149.5  | 1776.5  | 0.480437 | -1.694745964 | 0.589764 |
| 434.5   | 521     | 0.997571 | 0.004971958  | 0.863441 |
| 53.8695 | 105.245 | 0.818466 | -0.790065158 | 0.473953 |
| 766.996 | 716.007 | 0.708086 | -0.894824935 | 0.747679 |
| 1157    | 782.998 | 0.953024 | 0.082392885  | 0.705542 |
| 1428.5  | 1270    | 0.970335 | 0.053531068  | 0.883871 |
| 0.5     | 1       | 1        | 0            | 0.651448 |
| 463     | 547.5   | 0.892109 | -0.238319539 | 0.767048 |
| 425.499 | 418.501 | 0.673193 | -0.535800153 | 0.689086 |
| 564.5   | 525     | 0.430885 | -0.552115135 | 0.529955 |
| 358     | 349     | 0.903186 | -0.207691372 | 0.921236 |
| 1960.5  | 2112    | 0.886758 | -0.220186465 | 0.826206 |
| 13      | 13.5    | 0.654211 | -1.115477217 | 0.632221 |
| 4804.96 | 5098    | 0.902438 | -0.213138397 | 0.85971  |
| 2372.97 | 2215.52 | 0.741593 | -0.509422448 | 0.796991 |
| 621.5   | 613     | 0.7605   | -0.354798077 | 0.774874 |
| 618.5   | 514.474 | 0.56969  | -0.685842528 | 0.747056 |
| 0       | 0       | ?        | #DIV/0!      | ?        |
| 3       | 1       | 0.409442 | -2.584962501 | 0.860525 |
| 1404.5  | 1888.5  | 0.991194 | 0.024444412  | 0.833162 |
| 1167    | 1011    | 0.830475 | -0.372405164 | 0.929385 |
| 415.5   | 463     | 0.936572 | 0.140499121  | 0.992526 |
| 1323    | 1475.5  | 0.866919 | -0.334110895 | 0.794843 |
| 1796.72 | 1807.29 | 0.798304 | -0.448438921 | 0.794014 |
| 993     | 986.5   | 0.687935 | -0.537797393 | 0.693982 |
| 1033    | 1020    | 0.942641 | -0.118564693 | 0.951771 |
| 2460.47 | 2304.53 | 0.687989 | -0.620429277 | 0.741087 |
| 2463.5  | 2482.5  | 0.771187 | -0.551389747 | 0.765881 |
| 913     | 661     | 0.821229 | 0.292233423  | 0.620972 |
| 7061    | 6926.5  | 0.835519 | -0.268971852 | 0.853594 |
| 398.5   | 390.5   | 0.509632 | -0.641256433 | 0.531847 |
| 433.5   | 450.5   | 0.874342 | -0.246160587 | 0.843499 |
| 2829.5  | 2798    | 0.121094 | -0.825634585 | 0.127561 |
| 2536    | 2427    | 0.77686  | -0.35414272  | 0.819595 |
| 1979.5  | 2017    | 0.974176 | -0.048168407 | 0.959295 |
| 3777.49 | 3670.06 | 0.622271 | -0.631114518 | 0.649349 |
| 2820.5  | 2593.5  | 0.504937 | -0.708100603 | 0.591616 |

|         |         |          |              |          |
|---------|---------|----------|--------------|----------|
| 6194.5  | 7018    | 0.217163 | -0.697415199 | 0.126802 |
| 6248    | 8884    | 0.836948 | -0.539057794 | 0.634207 |
| 7260.46 | 6982.28 | 0.961862 | -0.087366596 | 0.986722 |
| 593.5   | 525     | 0.914196 | -0.151058082 | 0.986143 |
| 350.5   | 357.5   | 0.920747 | -0.170182281 | 0.906617 |
| 105     | 152.5   | 0.715743 | -1           | 0.501255 |
| 5.5     | 5       | 0.679547 | -0.459431619 | 0.781117 |
| 4163.43 | 3382.98 | 0.354249 | -0.610452577 | 0.651942 |
| 429.5   | 332     | 0.459932 | -0.866931072 | 0.702377 |
| 6264.5  | 5592.5  | 0.530097 | -0.537170273 | 0.674515 |
| 2583    | 3121.5  | 0.703475 | -0.871818515 | 0.584118 |
| 1683    | 1429    | 0.795156 | -0.248704575 | 0.990222 |
| 961     | 874     | 0.517194 | -1.773966301 | 0.568662 |
| 5445    | 6205.5  | 0.953222 | -0.118394701 | 0.871071 |
| 95      | 78      | 0.979099 | -0.046293652 | 0.902826 |
| 1438.5  | 1493.01 | 0.797809 | -0.372057273 | 0.765533 |
| 1016.96 | 1264.39 | 0.521451 | -0.76163254  | 0.332314 |
| 485.5   | 475.5   | 0.885909 | -0.245607844 | 0.90079  |
| 2787    | 2851    | 0.802104 | -0.392608631 | 0.783736 |
| 4888.5  | 4666    | 0.771977 | -0.374827329 | 0.815914 |
| 2019.5  | 2133    | 0.832908 | -0.373839991 | 0.793085 |
| 3141.5  | 3372.5  | 0.856262 | -0.336844054 | 0.806867 |
| 1570.56 | 1643.84 | 0.858071 | -0.330101361 | 0.826422 |
| 6051    | 6516    | 0.894328 | -0.234282942 | 0.841092 |
| 997     | 1432    | 0.970064 | -0.076516046 | 0.726013 |
| 12727.5 | 13634.5 | 0.766951 | -0.513318743 | 0.71488  |
| 2855.43 | 2988.5  | 0.832587 | -0.374913204 | 0.799534 |
| 5010    | 5511    | 0.867794 | -0.28444416  | 0.796005 |
| 2527    | 2909    | 0.256556 | -0.662513111 | 0.143186 |
| 1397.5  | 1212.5  | 0.597777 | -0.637257874 | 0.735895 |
| 2536.5  | 2506    | 0.847595 | -0.22248722  | 0.860202 |
| 3431    | 3834    | 0.884923 | -0.241084554 | 0.799388 |
| 768.5   | 824.5   | 0.947795 | -0.119315112 | 0.900168 |
| 1260    | 1461    | 0.882411 | -0.32336005  | 0.791613 |
| 1510    | 1589    | 0.61958  | -0.72902559  | 0.576582 |
| 1757    | 1882    | 0.903483 | -0.219999495 | 0.85563  |
| 1070    | 1097    | 0.872384 | -0.300182714 | 0.855519 |
| 8       | 12.5    | 0.603383 | -2           | 0.38578  |
| 563.5   | 720     | 0.782236 | -0.343855934 | 0.535426 |
| 2048.5  | 1540    | 0.481092 | -0.567810277 | 0.861314 |
| 190.5   | 167     | 0.727327 | -0.637009248 | 0.818334 |
| 11.5    | 16      | 0.889436 | -0.353636955 | 0.700608 |
| 962.498 | 918.996 | 0.493894 | -0.557486289 | 0.552336 |
| 2264    | 1807.5  | 0.594179 | -0.580985283 | 0.830903 |
| 2527.5  | 2491.5  | 0.71752  | -0.411711674 | 0.732737 |
| 3331.5  | 3252    | 0.9298   | -0.168626446 | 0.944943 |
| 2123    | 2177.5  | 0.663204 | -0.821856208 | 0.645335 |
| 1071    | 1181.5  | 0.9137   | -0.178284069 | 0.838371 |
| 34      | 49.5    | 0.922673 | -0.180572246 | 0.642668 |
| 1331    | 1596.5  | 0.808013 | -0.394588663 | 0.66005  |
| 2294.5  | 2106    | 0.615343 | -0.806961999 | 0.682217 |
| 868.497 | 1081.5  | 0.964788 | -0.077623176 | 0.803051 |
| 3628.5  | 4816.5  | 0.930413 | 0.187292398  | 0.905395 |
| 5505    | 5621.5  | 0.883316 | -0.289695902 | 0.869922 |
| 1757.5  | 2173    | 0.717076 | -0.902792027 | 0.590387 |
| 3877.5  | 4755.5  | 0.720083 | -0.696306384 | 0.575345 |

|         |         |          |              |          |
|---------|---------|----------|--------------|----------|
| 1487    | 2079    | 0.852976 | -0.452052707 | 0.651144 |
| 1325.5  | 1593    | 0.733399 | -0.723963373 | 0.611562 |
| 876.5   | 922.5   | 0.832554 | -0.36728054  | 0.794692 |
| 487     | 517.998 | 0.856911 | -0.307561803 | 0.810707 |
| 1177    | 1299.5  | 0.835259 | -0.380719643 | 0.764226 |
| 2307.47 | 2762.5  | 0.978134 | -0.05411549  | 0.862084 |
| 409     | 443.499 | 0.875982 | -0.333882365 | 0.826428 |
| 7753.54 | 5826.65 | 0.616092 | -0.893604289 | 0.813496 |
| 3568.02 | 3241.02 | 0.764112 | -0.320622666 | 0.870471 |
| 2367.5  | 2754.5  | 0.775852 | -0.425331951 | 0.644688 |
| 1757.12 | 1945.26 | 0.957554 | -0.104822397 | 0.893131 |
| 1208.01 | 884.498 | 0.991185 | 0.013077564  | 0.739669 |
| 1067.5  | 1148    | 0.825917 | -0.399133084 | 0.773637 |
| 283     | 275     | 0.906078 | -0.170243653 | 0.929818 |
| 2444.73 | 2957    | 0.831923 | -0.371113351 | 0.686414 |
| 1313    | 1005.5  | 0.916707 | -0.13766835  | 0.869511 |
| 11189.8 | 10826.7 | 0.679047 | -0.563916245 | 0.70885  |
| 1820    | 1447.5  | 0.358509 | -1.881355504 | 0.493309 |
| 4390.34 | 4571.34 | 0.685183 | -0.583303991 | 0.649945 |
| 5897.03 | 6047.5  | 0.80535  | -0.407480585 | 0.785895 |
| 920.199 | 1161.65 | 0.82509  | -0.407525863 | 0.652726 |
| 11817.3 | 16145.2 | 0.772276 | -0.511315485 | 0.531499 |
| 672.5   | 598.5   | 0.406158 | -0.844568549 | 0.521088 |
| 215.5   | 243     | 0.989072 | -0.027030206 | 0.914198 |
| 10724.1 | 9669.28 | 0.686994 | -0.471038369 | 0.792558 |
| 6314.5  | 4969.5  | 0.368556 | -0.651831924 | 0.691534 |
| 1835.5  | 1809    | 0.23393  | -0.672032398 | 0.248452 |
| 320.5   | 297.5   | 0.709719 | -0.565957332 | 0.77074  |
| 999.5   | 872.5   | 0.856909 | -0.235442013 | 0.977471 |
| 25730   | 20467   | 0.489061 | -1.02802537  | 0.669949 |
| 480     | 467     | 0.902258 | -0.167109986 | 0.926335 |
| 1935.5  | 1873    | 0.536854 | -0.933360219 | 0.563034 |
| 115     | 115     | 0.913716 | -0.187278568 | 0.913716 |
| 506.5   | 416.5   | 0.72016  | -0.646796557 | 0.854239 |
| 0       | 1       | 1        | #DIV/0!      | 0.308068 |
| 0       | 0       | ?        | #DIV/0!      | ?        |
| 12      | 3       | 0.464046 | 1.392317423  | 0.30856  |
| 0       | 0       | 0.308068 | #DIV/0!      | 0.308068 |
| 0       | 0       | ?        | #DIV/0!      | ?        |
| 0.5     | 0       | 0.622002 | 1            | 0.353387 |
| 1.5     | 2       | 0.438509 | #NUM!        | 0.320255 |
| 2.5     | 6.5     | 0.771744 | -1.321928095 | 0.328644 |
| 3.5     | 6       | 0.522315 | -1.222392421 | 0.202587 |
| 2       | 1.5     | 0.774348 | 0.584962501  | 0.670131 |
| 1       | 0       | 0        | #NUM!        | ?        |
| 2       | 3.5     | 0.534406 | #NUM!        | 0.308068 |
| 1.5     | 1       | 0.535489 | 1.415037499  | 0.463813 |
| 965     | 897     | 0.715814 | -0.389843417 | 0.796913 |
| 0.5     | 0.5     | 0.651448 | 1            | 0.651448 |
| 9.5     | 7.5     | 0.748273 | -0.662965013 | 0.889735 |
| 1217    | 1732.5  | 0.97007  | -0.069204363 | 0.709932 |
| 456     | 479.5   | 0.929662 | 0.109624491  | 0.975533 |
| 118     | 49      | 0.601048 | -0.634715536 | 0.732909 |
| 880     | 810     | 0.873615 | -0.172180975 | 0.962754 |
| 17846.5 | 17994.5 | 0.903134 | 0.202478909  | 0.908428 |
| 2475.5  | 1563    | 0.921142 | -0.116157299 | 0.712676 |

|         |         |          |              |          |
|---------|---------|----------|--------------|----------|
| 1093.5  | 801.5   | 0.860888 | -0.290606484 | 0.935092 |
| 579     | 561     | 0.849475 | 0.304379894  | 0.83     |
| 80      | 103     | 0.618511 | -1.234465254 | 0.467309 |
| 2266.5  | 1953.5  | 0.743415 | -0.506457553 | 0.860358 |
| 1054.5  | 901     | 0.773795 | -0.41298676  | 0.904385 |
| 994.5   | 1280    | 0.994189 | -0.016046319 | 0.844935 |
| 3378    | 3437.5  | 0.686928 | -0.654183155 | 0.67312  |
| 8923    | 8639.5  | 0.786409 | -0.403389596 | 0.813371 |
| 1483    | 1452    | 0.87676  | 0.305688188  | 0.866    |
| 1959.99 | 1928.51 | 0.949626 | -0.124854523 | 0.95937  |
| 9773    | 9501.5  | 0.849587 | -0.347319528 | 0.86882  |
| 1140.01 | 1067.49 | 0.823289 | -0.349070773 | 0.874781 |
| 121     | 124.5   | 0.942442 | -0.124447371 | 0.922384 |
| 3320    | 3286.5  | 0.976785 | 0.05373946   | 0.970617 |
| 523.5   | 560.5   | 0.796166 | -0.411825901 | 0.741032 |
| 2371    | 3040.5  | 0.676408 | -0.921261101 | 0.514944 |
| 264     | 282.5   | 0.750561 | -0.622329353 | 0.704018 |
| 909.503 | 1009.01 | 0.928864 | -0.165358693 | 0.857894 |
| 1754.5  | 2089.5  | 0.918461 | -0.221296461 | 0.811287 |
| 285     | 373.498 | 0.655333 | -1.253951301 | 0.503627 |
| 8031.5  | 7607.5  | 0.750698 | -0.466138386 | 0.796548 |
| 1474.5  | 1331    | 0.544988 | -0.51898284  | 0.675959 |
| 3060.5  | 2786.5  | 0.642314 | -0.550264426 | 0.736397 |
| 13583   | 14401   | 0.886506 | -0.250618545 | 0.844384 |
| 2587.5  | 2545    | 0.406527 | -0.705256734 | 0.424428 |
| 12731.6 | 13260   | 0.815719 | -0.392009094 | 0.784715 |
| 7078    | 6494.5  | 0.600707 | -0.575262394 | 0.691662 |
| 2932.5  | 3624.5  | 0.390966 | -0.64716539  | 0.196906 |
| 781.5   | 757.5   | 0.989305 | 0.023801346  | 0.96957  |
| 201.5   | 242     | 0.853341 | -0.392541183 | 0.735192 |
| 153.5   | 162.5   | 0.74225  | -0.770241749 | 0.708152 |
| 15988.9 | 15480.4 | 0.757048 | -0.45349986  | 0.784522 |
| 10061   | 10651.5 | 0.914542 | 0.18082949   | 0.952004 |
| 3736    | 2222.5  | 0.742354 | -0.33054585  | 0.747615 |
| 76.191  | 69.1826 | 0.397326 | -1.205677653 | 0.469904 |
| 33      | 45.5    | 0.664982 | -0.686842115 | 0.409139 |
| 2721.5  | 2684.5  | 0.950469 | -0.113270114 | 0.959374 |
| 994.002 | 797.492 | 0.5458   | -0.607270853 | 0.791884 |
| 787     | 853.5   | 0.899405 | -0.215078362 | 0.839097 |
| 4       | 2.5     | 0.463813 | -2           | 0.703593 |
| 1401.09 | 1384.1  | 0.639545 | -0.659659107 | 0.650215 |
| 1485    | 1583.5  | 0.689144 | -0.514573173 | 0.627717 |
| 2274    | 2226    | 0.61662  | -0.630888989 | 0.636873 |
| 620.5   | 596.5   | 0.774177 | -0.414650043 | 0.807983 |
| 475     | 514.5   | 0.801779 | -0.405954395 | 0.737931 |
| 1674.49 | 1655.01 | 0.689532 | -0.626691707 | 0.699    |
| 185.5   | 270     | 0.937132 | -0.186547222 | 0.711063 |
| 1319.5  | 1384    | 0.80719  | -0.402157018 | 0.770006 |
| 189     | 213.5   | 1        | 0            | 0.915874 |
| 19      | 13.5    | 0.98242  | 0.037474705  | 0.792781 |
| 631.5   | 467.5   | 0.486846 | -1.63375394  | 0.659155 |
| 1511.5  | 1551    | 0.853155 | -0.283896717 | 0.83214  |
| 1317.17 | 1298.13 | 0.825002 | -0.422834423 | 0.834725 |
| 0       | 0       | ?        | #DIV/0!      | ?        |
| 368     | 477     | 0.776083 | -0.523561956 | 0.582706 |
| 909.505 | 940.996 | 0.968703 | -0.064062852 | 0.943805 |

|         |         |          |              |          |
|---------|---------|----------|--------------|----------|
| 423     | 397.498 | 0.958105 | -0.091515022 | 0.999198 |
| 109.763 | 231.209 | 0.690675 | 0.966989324  | 0.948845 |
| 381.001 | 393.001 | 0.764483 | -0.480893833 | 0.739715 |
| 79      | 99.5    | 0.929902 | -0.195256291 | 0.78971  |
| 5647.5  | 6274    | 0.753966 | -0.650417179 | 0.684304 |
| 117     | 117.5   | 0.873334 | -0.308122295 | 0.870558 |
| 291     | 287.5   | 0.913013 | -0.159735781 | 0.922943 |
| 422.095 | 409.647 | 0.78041  | -0.409416838 | 0.80575  |
| 670     | 556.5   | 0.658281 | -0.949225433 | 0.77185  |
| 456     | 499.5   | 0.894206 | -0.257350767 | 0.833588 |
| 808.5   | 700.5   | 0.891222 | -0.202749548 | 0.997938 |
| 4043.45 | 3911.04 | 0.760361 | -0.458544356 | 0.788041 |
| 882.5   | 924.5   | 0.681368 | -0.697989627 | 0.645766 |
| 733.5   | 660.5   | 0.790026 | -0.399712083 | 0.874885 |
| 117.5   | 131     | 0.779126 | -0.527788792 | 0.701629 |
| 1.5     | 0       | 0.034897 | #NUM!        | 1        |
| 0.5     | 1       | 0.622002 | #NUM!        | 0.353387 |
| 2507.5  | 2255    | 0.38332  | -1.825447648 | 0.445586 |
| 34      | 45.5    | 0.836426 | -0.359542387 | 0.608552 |
| 81.5    | 66.5    | 0.41113  | -1.198981035 | 0.566631 |
| 6.5     | 16.5    | 0.79761  | -0.700439718 | 0.255883 |
| 8480.52 | 10113   | 0.911984 | -0.179957681 | 0.771825 |
| 412.5   | 252     | 0.807605 | 0.392567218  | 0.592837 |
| 4277    | 3946.5  | 0.548816 | -0.715038952 | 0.626453 |
| 2.5     | 7       | 0.794363 | 0.485426827  | 0.392404 |
| 134.5   | 233     | 0.925479 | 0.190632483  | 0.699382 |
| 2960.5  | 3089.5  | 0.778856 | -0.510992377 | 0.748143 |
| 1360.51 | 1117.01 | 0.712809 | -0.485886905 | 0.88927  |
| 659.5   | 680     | 0.871263 | -0.341474496 | 0.852596 |
| 4253.91 | 4008.49 | 0.771149 | -0.453262626 | 0.818612 |
| 147     | 129.5   | 0.647498 | -0.833350131 | 0.73667  |
| 199.5   | 203.5   | 0.69422  | -0.595850817 | 0.677628 |
| 2745.5  | 2524    | 0.731327 | -0.438790826 | 0.811017 |
| 1673    | 1593.5  | 0.734293 | -0.605589841 | 0.769378 |
| 1602.5  | 1851.5  | 0.818231 | -0.453815827 | 0.719223 |
| 2109.5  | 2299.5  | 0.657527 | -1.023094644 | 0.60423  |
| 1504.5  | 1464.5  | 0.964054 | -0.081870008 | 0.98137  |
| 24.5    | 16.5    | 0.83614  | 0.316027493  | 0.635315 |
| 1144.5  | 970.5   | 0.42324  | -2.560588905 | 0.504814 |
| 110.5   | 108.5   | 0.876852 | -0.264342171 | 0.890024 |
| 173.936 | 232.803 | 0.835801 | -0.483570077 | 0.655007 |
| 297     | 284.5   | 0.980016 | 0.033608393  | 0.944392 |
| 115.5   | 232     | 0.824004 | 0.549130395  | 0.793771 |
| 148     | 173.5   | 0.709012 | -0.834413934 | 0.607666 |
| 713.5   | 623     | 0.683094 | -0.562890241 | 0.802249 |
| 581.5   | 520     | 0.793064 | -0.363456419 | 0.889921 |
| 3713    | 3074    | 0.351983 | -1.931332431 | 0.461227 |
| 10.5    | 13.5    | 0.918563 | -0.222392421 | 0.760872 |
| 525     | 696.5   | 0.827884 | -0.481584761 | 0.64527  |
| 457.5   | 480     | 0.719325 | -0.573185333 | 0.680582 |
| 2713    | 2347.5  | 0.612906 | -0.959623926 | 0.711499 |
| 4541    | 3786    | 0.307062 | -0.944528865 | 0.480759 |
| 128     | 121.5   | 0.64787  | -0.901967917 | 0.682931 |
| 19160   | 19413.5 | 0.567107 | -1.18534897  | 0.558548 |
| 3803.5  | 3809    | 0.727763 | -0.478426654 | 0.726455 |
| 74.5    | 81.5    | 0.950576 | 0.102759574  | 0.986508 |

|         |         |          |              |           |
|---------|---------|----------|--------------|-----------|
| 864.5   | 994.5   | 0.52949  | -0.992509787 | 0.423963  |
| 673     | 744.999 | 0.858525 | -0.343253754 | 0.789236  |
| 573     | 422.5   | 0.857367 | -0.257004324 | 0.912586  |
| 910.5   | 909.995 | 0.905001 | -0.21764671  | 0.905375  |
| 342.5   | 333.5   | 0.650371 | -0.722992652 | 0.671511  |
| 33      | 159.5   | 0.95356  | -0.316473665 | 0.286343  |
| 2032.5  | 2240.5  | 0.891476 | -0.282111997 | 0.830166  |
| 4104    | 4279    | 0.768127 | 0.523561956  | 0.789858  |
| 81.5001 | 66.5    | 0.691961 | -0.809571113 | 0.819121  |
| 895.503 | 947.996 | 0.726997 | -0.55271406  | 0.680673  |
| 551.5   | 560.5   | 0.817927 | -0.325857362 | 0.803681  |
| 10.5    | 72.5    | 0.750833 | -2.070389328 | 0.0556507 |
| 288.999 | 219.499 | 0.765912 | 0.463518844  | 0.63115   |
| 2538.85 | 2332.31 | 0.840862 | -0.321168264 | 0.905081  |
| 129     | 90.5    | 0.854413 | 0.246160587  | 0.638805  |
| 0.5     | 0.5     | 0.450185 | #NUM!        | 0.450185  |
| 1436.5  | 1139.5  | 0.988658 | 0.023410376  | 0.846814  |
| 1556.5  | 1601    | 0.889766 | -0.263127097 | 0.871103  |
| 1962.5  | 1837.5  | 0.822711 | -0.37337486  | 0.871429  |
| 3916.5  | 4150    | 0.550419 | -0.769820382 | 0.4987    |
| 736     | 673.5   | 0.713511 | -0.440082629 | 0.802371  |
| 0       | 0.5     | 0.450185 | #DIV/0!      | 1         |
| 0.5     | 0.5     | 0.450185 | #NUM!        | 0.450185  |
| 4494    | 4357    | 0.866766 | -0.29084485  | 0.888763  |
| 1557.5  | 1552.5  | 0.842479 | -0.372595521 | 0.844656  |
| 1183    | 1124    | 0.63628  | -0.515618857 | 0.691415  |
| 2919.5  | 3279    | 0.935583 | 0.148713193  | 0.991349  |
| 3031.5  | 3039    | 0.842699 | -0.40436926  | 0.84114   |
| 1018.5  | 927.998 | 0.831873 | -0.284878036 | 0.9145    |
| 1720.5  | 1780    | 0.837711 | -0.341875694 | 0.811834  |
| 1277    | 1123    | 0.825881 | -0.287875673 | 0.941305  |
| 1906.5  | 1738.5  | 0.826448 | -0.230042975 | 0.929471  |
| 3309    | 3058    | 0.553581 | -0.56741204  | 0.645262  |
| 1235    | 1345.5  | 0.44397  | -0.616554548 | 0.349619  |
| 6345.6  | 6011.25 | 0.662286 | -0.605674602 | 0.710258  |
| 34.5    | 28.5    | 0.182193 | -2.786596362 | 0.26211   |
| 3419.5  | 3007    | 0.548002 | -0.58696793  | 0.695271  |
| 556     | 735.504 | 0.781949 | -0.528354023 | 0.578459  |
| 768.001 | 672.499 | 0.682893 | -0.594860415 | 0.794376  |
| 907.995 | 1023    | 0.936228 | -0.168339773 | 0.863712  |
| 997.5   | 1017    | 0.875878 | -0.312020613 | 0.863585  |
| 622.5   | 597.5   | 0.421183 | -0.966780465 | 0.456312  |
| 1754.74 | 1709.36 | 0.67839  | -0.589083343 | 0.701291  |
| 17.5    | 144.5   | 0.979774 | -0.175086707 | 0.17399   |
| 0       | 3.5     | 0.353387 | #DIV/0!      | 0.0714215 |
| 12899   | 12050   | 0.645412 | -0.587873418 | 0.709701  |
| 1956    | 1978.5  | 0.867992 | -0.237157741 | 0.858136  |
| 6.5     | 8       | 0.55775  | -1.378511623 | 0.432543  |
| 295.501 | 265.5   | 0.691203 | -0.723203425 | 0.766538  |
| 788     | 866.5   | 0.775921 | -0.549249285 | 0.709788  |
| 1       | 1       | 0.450185 | #NUM!        | 0.450185  |
| 92.5    | 99.5    | 0.597741 | -0.476099025 | 0.509505  |
| 526     | 548.5   | 0.704892 | -0.509488435 | 0.666175  |
| 0.5     | 0.5     | 1        | 0            | 1         |
| 1.5     | 0.5     | 1        | 0            | 0.513713  |
| 357.5   | 284     | 0.216529 | -1.282127087 | 0.384564  |

|         |         |          |              |          |
|---------|---------|----------|--------------|----------|
| 1088.5  | 1169    | 0.846593 | -0.302676494 | 0.788561 |
| 160.5   | 149     | 0.986397 | 0.017866421  | 0.90849  |
| 5.5     | 7.5     | 0.863365 | 0.2410081    | 0.863365 |
| 2876.94 | 3189.93 | 0.819107 | -0.446574384 | 0.748511 |
| 28.5    | 33.5    | 0.955877 | 0.097847323  | 0.933882 |
| 3196.99 | 3165.9  | 0.862859 | -0.299895994 | 0.869862 |
| 724     | 524.087 | 0.515362 | -1.626069593 | 0.69293  |
| 1109.49 | 1121.01 | 0.929524 | -0.154224019 | 0.922346 |
| 174.5   | 169     | 0.842502 | 0.284235805  | 0.820277 |
| 1653.5  | 1728    | 0.727792 | -0.62723825  | 0.695545 |
| 0       | 0       | 0        | #DIV/0!      | 0        |
| 16.5    | 15.5    | 0.497003 | -2.237039197 | 0.52814  |
| 396     | 484.5   | 0.828995 | -0.427232796 | 0.689187 |
| 1.5     | 0.5     | 0.505748 | 1.415037499  | 0.368766 |
| 44      | 52      | 0.639217 | -0.844721775 | 0.516728 |
| 4       | 4       | 0.710482 | -1           | 0.710482 |
| 10      | 13.5    | 0.667267 | -1           | 0.478521 |
| 14      | 24      | 0.846406 | 0.402098444  | 0.81317  |
| 738     | 897.5   | 0.97802  | -0.047696742 | 0.833837 |
| 3       | 2.5     | 0.31594  | -2.584962501 | 0.407544 |
| 3481.99 | 3678.32 | 0.937968 | 0.123214296  | 0.977166 |
| 204.5   | 260.5   | 0.94291  | -0.152395077 | 0.790566 |
| 35      | 25      | 0.52746  | 1.313660479  | 0.457891 |
| 35      | 29      | 0.805735 | -0.485426827 | 0.921258 |
| 256     | 307.5   | 0.889374 | -0.255166163 | 0.756983 |
| 3873    | 3517    | 0.956428 | -0.101652497 | 0.984694 |
| 1619    | 1216.5  | 0.795972 | -0.414146672 | 0.999229 |
| 116.5   | 111.5   | 0.783107 | -0.454795209 | 0.816489 |
| 55      | 55.5    | 0.743568 | -0.495957495 | 0.736011 |
| 599     | 678.5   | 0.857513 | -0.337668944 | 0.770102 |
| 322     | 385.5   | 0.705057 | -0.973364873 | 0.600306 |
| 99.0001 | 134.5   | 0.654343 | -0.686843572 | 0.406009 |
| 918.889 | 795.652 | 0.869871 | -0.236153853 | 0.985353 |
| 1334    | 1374.5  | 0.869958 | -0.260657108 | 0.846501 |
| 545     | 612     | 0.487959 | -2.124328135 | 0.427973 |
| 6       | 95      | 0.818263 | 1.624490865  | 0.222569 |
| 61      | 50.5    | 0.925989 | -0.149377624 | 0.944437 |
| 121     | 87      | 0.982935 | 0.035333073  | 0.793247 |
| 11      | 20      | 0.907098 | -0.289506617 | 0.535652 |
| 69      | 37      | 0.977133 | -0.042435266 | 0.672515 |
| 2952.08 | 2945.19 | 0.705981 | -0.490381014 | 0.708193 |
| 178.5   | 193     | 0.945038 | -0.11783649  | 0.888549 |
| 21.5    | 23      | 0.730615 | -0.782408565 | 0.689086 |
| 136.928 | 134.695 | 0.803489 | -0.440291153 | 0.81532  |
| 1219.48 | 1755.5  | 0.825989 | -0.593844256 | 0.619406 |
| 855.501 | 976.503 | 0.811133 | -0.442565455 | 0.71566  |
| 922     | 1144.5  | 0.937597 | -0.159498536 | 0.796928 |
| 138.5   | 57.5    | 0.638776 | 0.624350094  | 0.358334 |
| 2       | 7.5     | 0.266778 | 1.807354922  | 0.900374 |
| 1217    | 1297.5  | 0.771225 | -0.490057514 | 0.721756 |
| 1949.02 | 1989.5  | 0.857058 | -0.310597443 | 0.842029 |
| 424     | 370.5   | 0.821875 | -0.372569358 | 0.919784 |
| 112.5   | 139     | 0.911586 | -0.266886731 | 0.791433 |
| 15.5    | 20.5    | 0.786857 | -0.632268215 | 0.61204  |
| 20.5    | 18      | 0.53083  | -0.898120386 | 0.638661 |
| 1.5     | 2       | 0.663808 | -1.584962501 | 0.523243 |



|         |         |          |              |          |
|---------|---------|----------|--------------|----------|
| 1670    | 1484.5  | 0.799027 | -0.484045266 | 0.876044 |
| 2.5     | 3.5     | 0.903291 | 0.263034406  | 0.903291 |
| 25.7477 | 25.7691 | 0.624148 | -1.025534292 | 0.623606 |
| 1146.25 | 1298.23 | 0.827809 | -0.448711277 | 0.746223 |
| 240     | 273.5   | 0.575156 | -1.018147347 | 0.482287 |
| 1.5     | 0       | 1        | 0            | 0.450185 |
| 1120.99 | 1506.51 | 0.969314 | -0.084784383 | 0.788348 |
| 4       | 5.5     | 0.574202 | -3           | 0.435351 |
| 1.5     | 1       | 0.559404 | -1.584962501 | 0.764931 |
| 34.5    | 48      | 0.613014 | 1.01041454   | 0.752464 |
| 520.5   | 427     | 0.982084 | -0.039335894 | 0.898678 |
| 161     | 72.5    | 0.965769 | 0.065687903  | 0.592947 |
| 654.622 | 657.786 | 0.898608 | -0.228216474 | 0.895288 |
| 243.5   | 212     | 0.90343  | -0.179585112 | 0.989796 |
| 5429    | 5468    | 0.523445 | -0.807720359 | 0.517028 |
| 764.5   | 779     | 0.644568 | -0.539453702 | 0.625431 |
| 1716.5  | 1657.5  | 0.776937 | -0.462165789 | 0.803958 |
| 2387.02 | 2555.05 | 0.81037  | -0.371175465 | 0.754134 |
| 2645.06 | 2484.52 | 0.46108  | -0.886307022 | 0.517366 |
| 1130.01 | 1184.01 | 0.698939 | -0.626412103 | 0.661767 |
| 285     | 301     | 0.966977 | -0.072669068 | 0.929351 |
| 1541.26 | 1474.11 | 0.663274 | -0.493495627 | 0.710082 |
| 173.5   | 153.5   | 0.930528 | -0.153389634 | 0.990056 |
| 64.5    | 69.5    | 0.987892 | -0.022542569 | 0.927508 |
| 1674.48 | 1557.48 | 0.724298 | -0.573775319 | 0.780355 |
| 909.5   | 984     | 0.756355 | -0.601313884 | 0.701733 |
| 647.002 | 691     | 0.823676 | -0.412807921 | 0.777262 |
| 669     | 478     | 0.944966 | -0.103932374 | 0.830797 |
| 17140.8 | 16556.9 | 0.64489  | -0.589768032 | 0.677654 |
| 326     | 443.5   | 0.716555 | -0.730342652 | 0.50193  |
| 730.497 | 820.499 | 0.900185 | -0.210095614 | 0.811478 |
| 1110    | 1043.5  | 0.630374 | -0.53797127  | 0.695415 |
| 1514    | 1987.5  | 0.993509 | -0.016772926 | 0.820321 |
| 160.5   | 173.5   | 0.965767 | -0.069041644 | 0.906721 |
| 202     | 219     | 0.758117 | -0.597515551 | 0.702097 |
| 2580.5  | 2511    | 0.641638 | -0.502919708 | 0.671339 |
| 130.5   | 106     | 0.930863 | -0.157541277 | 0.943629 |
| 301     | 296     | 0.683256 | -0.686725217 | 0.696057 |
| 705.5   | 698     | 0.790146 | -0.409934222 | 0.798857 |
| 128.5   | 108     | 0.741456 | -0.570996322 | 0.864866 |
| 10210.5 | 10188   | 0.386092 | -0.91448752  | 0.388037 |
| 63924.4 | 57598.8 | 0.552341 | -0.590507004 | 0.669971 |
| 3       | 3       | 1        | 0            | 1        |
| 751.414 | 635.358 | 0.633578 | -0.682498468 | 0.775397 |
| 126.5   | 209.5   | 0.971487 | 0.088468788  | 0.740161 |
| 0       | 0.5     | 1        | #DIV/0!      | 0.308068 |
| 141.5   | 158.5   | 0.832644 | 0.378903713  | 0.898836 |
| 328     | 325.5   | 0.86181  | -0.288773727 | 0.86753  |
| 2.5     | 1.5     | 0.398521 | -1.321928095 | 0.764931 |
| 154.5   | 176     | 0.967434 | -0.086587685 | 0.89014  |
| 84.5    | 49      | 0.720576 | 0.610347819  | 0.530788 |
| 1537.5  | 1471.5  | 0.762885 | -0.467429622 | 0.798317 |
| 3220.5  | 2869.5  | 0.735064 | -0.536725015 | 0.825044 |
| 223.5   | 209.5   | 0.997054 | 0.006440614  | 0.955849 |
| 6       | 6       | 0.502419 | 1.36923381   | 0.502419 |
| 107     | 103     | 0.760851 | -0.493539473 | 0.790509 |

|         |         |          |              |          |
|---------|---------|----------|--------------|----------|
| 1.5     | 2       | 0.806588 | -0.584962501 | 0.630057 |
| 1139.5  | 1238    | 0.802972 | -0.428818951 | 0.739996 |
| 255.153 | 280.437 | 0.783549 | -0.412700425 | 0.702803 |
| 1694.36 | 1784.44 | 0.402405 | -1.810525869 | 0.372757 |
| 3905.5  | 3425    | 0.818195 | 0.33446999   | 0.736633 |
| 22.5    | 33      | 0.794393 | 0.552541023  | 1        |
| 37.5    | 43      | 0.846123 | 0.341036918  | 0.93021  |
| 4       | 5.5     | 0.68993  | -1.415037499 | 0.532454 |
| 794.994 | 712.004 | 0.596598 | -0.969457138 | 0.674092 |
| 6       | 16      | 0.947101 | -0.125530882 | 0.227505 |
| 1358    | 1279    | 0.798835 | -0.376600628 | 0.848648 |
| 44.5    | 83.5    | 0.438745 | 1.767440553  | 0.610965 |
| 498     | 524     | 0.802226 | -0.452207292 | 0.765462 |
| 48.5    | 45      | 0.927965 | -0.156969346 | 0.978347 |
| 3       | 6.5     | 0.698091 | -1           | 0.249709 |
| 2032.01 | 1993.44 | 0.905516 | -0.175680238 | 0.921069 |
| 660.5   | 639.5   | 0.933749 | -0.121862045 | 0.959708 |
| 791.5   | 840     | 0.924642 | -0.157786666 | 0.880498 |
| 3       | 3       | 0.163506 | #NUM!        | 0.163506 |
| 1152    | 1214    | 0.935567 | -0.137190473 | 0.897607 |
| 741.5   | 801.5   | 0.829845 | -0.363126085 | 0.770321 |
| 52.5    | 56      | 0.534769 | -0.524420959 | 0.456763 |
| 0       | 0.5     | 0.353387 | #DIV/0!      | 0.622002 |
| 1014    | 1089.5  | 0.800401 | -0.443777395 | 0.746938 |
| 5       | 3.5     | 0.487603 | -1.736965594 | 0.682602 |
| 10.5    | 22.5    | 0.92318  | 0.251538767  | 0.636661 |
| 1040.5  | 1039.5  | 0.674913 | -0.534216903 | 0.675835 |
| 293.5   | 299     | 0.921425 | -0.16654404  | 0.908008 |
| 935.5   | 897     | 0.768421 | -0.490215476 | 0.800325 |
| 596.5   | 571     | 0.900485 | -0.192472331 | 0.934395 |
| 5642.67 | 5523.43 | 0.626742 | -0.576462078 | 0.648132 |
| 1081    | 1267    | 0.885885 | -0.271601186 | 0.775075 |
| 508     | 573     | 0.972621 | -0.057947349 | 0.884248 |
| 2510.5  | 2462    | 0.755735 | -0.573087223 | 0.769477 |
| 2194.17 | 1935.66 | 0.700353 | -0.560727447 | 0.805601 |
| 1222.49 | 1147.51 | 0.893659 | -0.201002631 | 0.943621 |
| 623.5   | 629.5   | 0.945105 | -0.103093493 | 0.937468 |
| 11.5    | 8       | 1        | 0            | 0.794308 |
| 17      | 6       | 0.661148 | -0.765534746 | 0.799835 |
| 1683.5  | 1468    | 0.677    | -0.677643488 | 0.781892 |
| 1888.5  | 2009    | 0.692539 | -0.783677258 | 0.650219 |
| 2578.5  | 3486.5  | 0.919945 | 0.181657944  | 0.870527 |
| 1991.5  | 2421    | 0.866884 | -0.36531516  | 0.743856 |
| 182.5   | 201     | 0.767772 | -0.5402091   | 0.697467 |
| 427     | 182.5   | 0.926156 | -0.11604044  | 0.564705 |
| 13.5    | 17      | 0.945824 | 0.103093493  | 0.865411 |
| 470.5   | 482     | 0.95624  | -0.096691199 | 0.939783 |
| 44.5    | 55.5    | 0.948855 | 0.138976413  | 0.926211 |
| 81      | 77      | 0.955456 | -0.101445264 | 0.987842 |
| 281.5   | 303     | 0.832021 | -0.378767897 | 0.778442 |
| 281     | 311     | 0.610592 | -0.790130412 | 0.528878 |
| 2389.51 | 2337.01 | 0.792906 | -0.440721383 | 0.809648 |
| 2532    | 2605.5  | 0.803935 | -0.42762754  | 0.782572 |
| 1785    | 2375    | 0.998309 | 0.004841263  | 0.837241 |
| 13329   | 14112   | 0.86655  | -0.311104478 | 0.82702  |
| 23.5    | 34.5    | 0.80906  | 0.467778961  | 0.956949 |

|         |         |          |              |           |
|---------|---------|----------|--------------|-----------|
| 4847.49 | 5617.91 | 0.829253 | -0.423801103 | 0.727968  |
| 4       | 18.5    | 0.918125 | -0.415037499 | 0.181856  |
| 33      | 15.5    | 0.531448 | 1.125530882  | 0.382087  |
| 1262.5  | 1525    | 0.969224 | -0.07385023  | 0.842563  |
| 1336.69 | 1232.79 | 0.734678 | -0.60326492  | 0.792576  |
| 0.5     | 3       | 1        | 0            | 0.0877066 |
| 192.5   | 219     | 0.991615 | 0.018615678  | 0.919711  |
| 1905.5  | 2044    | 0.965416 | -0.072586653 | 0.914405  |
| 914.5   | 963.5   | 0.833361 | -0.317203107 | 0.789607  |
| 91.5    | 34      | 0.680787 | 0.708301836  | 0.432769  |
| 1386    | 1502    | 0.992564 | -0.016224929 | 0.937017  |
| 523     | 447     | 0.736859 | -0.542827102 | 0.855832  |
| 1599.5  | 1809.5  | 0.900965 | -0.26402691  | 0.82476   |
| 70.5    | 56      | 0.857682 | 0.218000652  | 0.688795  |
| 3494    | 3771    | 0.840421 | -0.377809853 | 0.787306  |
| 65.5    | 73.5    | 0.907832 | 0.223964841  | 0.974781  |
| 1266    | 1662    | 0.928057 | -0.181940378 | 0.744728  |
| 1116    | 1057    | 0.888679 | -0.252986128 | 0.925059  |
| 889     | 1016    | 0.875787 | -0.26954037  | 0.775045  |
| 1037.5  | 901.5   | 0.690998 | -0.61056588  | 0.803536  |
| 808     | 568     | 0.706008 | -0.714231568 | 0.927149  |
| 692.999 | 654.5   | 0.492152 | -1.20789077  | 0.532264  |
| 1113    | 1271    | 0.869896 | -0.329074989 | 0.782177  |
| 811.5   | 612.5   | 0.945083 | -0.077607497 | 0.800862  |
| 724     | 860     | 0.975248 | -0.063134345 | 0.867592  |
| 1505.5  | 1447    | 0.89312  | -0.262555344 | 0.917921  |
| 440     | 488     | 0.595668 | -1.09836513  | 0.527389  |
| 98      | 52.5    | 0.849714 | 0.316027493  | 0.592202  |
| 514     | 479     | 0.868023 | -0.31737424  | 0.913176  |
| 671     | 560.5   | 0.809325 | -0.351249967 | 0.953977  |
| 127.5   | 111.5   | 0.883706 | -0.246160587 | 0.976616  |
| 672.499 | 683.503 | 0.890053 | -0.199860488 | 0.876312  |
| 7       | 3.5     | 0.798271 | -0.222392421 | 0.535489  |
| 662     | 564     | 0.802488 | -0.360858789 | 0.933655  |
| 414.5   | 435.5   | 0.978641 | 0.049605546  | 0.990424  |
| 343.5   | 204.5   | 0.939269 | 0.12465562   | 0.68083   |
| 890.506 | 876.005 | 0.721008 | -0.476560189 | 0.736197  |
| 2936    | 2784.5  | 0.715031 | -0.674538292 | 0.752247  |
| 1838.5  | 2317.91 | 0.861941 | -0.403402778 | 0.721471  |
| 75      | 59.5    | 0.828437 | -0.408639728 | 0.971844  |
| 807     | 882.5   | 0.803757 | -0.519433751 | 0.745912  |
| 5394.49 | 4699.54 | 0.804903 | -0.43888852  | 0.899549  |
| 1.5     | 2       | 0.670131 | 1            | 0.774348  |
| 75      | 63      | 0.626325 | -1.058893689 | 0.733086  |
| 38.5    | 25.5    | 0.725159 | -0.538866086 | 0.976352  |
| 1.5     | 0.5     | 0.513713 | -1.584962501 | 1         |
| 3       | 0       | 0.877103 | 0.222392421  | 0.323864  |
| 10      | 24      | 0.700402 | -2           | 0.311506  |
| 62      | 69      | 0.991199 | 0.023083613  | 0.947253  |
| 75      | 151.5   | 0.743256 | -1.370837695 | 0.409383  |
| 14      | 20      | 0.620147 | -1.347923303 | 0.416754  |
| 689.5   | 760.5   | 0.701372 | -0.933551715 | 0.643128  |
| 3       | 2       | 0.308068 | -1           | 0.710482  |
| 115.5   | 142     | 0.736427 | -0.691877705 | 0.595664  |
| 1.5     | 0       | 0.756486 | -0.584962501 | 0.545627  |
| 10.5    | 10.5    | 0.972224 | -0.070389328 | 0.972224  |

|         |         |          |              |          |
|---------|---------|----------|--------------|----------|
| 2.5     | 1.5     | 0.236154 | -2.321928095 | 0.513713 |
| 1269    | 1690.5  | 0.742319 | -0.865496811 | 0.575692 |
| 13      | 2.5     | 0.334871 | -1.530514717 | 0.804892 |
| 1937.03 | 1950.02 | 0.929373 | -0.14319755  | 0.924383 |
| 903.5   | 1034    | 0.86278  | -0.351775241 | 0.774288 |
| 222.5   | 219     | 0.730691 | -0.409644241 | 0.746889 |
| 41.5    | 40      | 0.496872 | 1.290296486  | 0.487083 |
| 0       | 0       | 0.308068 | #DIV/0!      | 0.308068 |
| 745.999 | 692.496 | 0.426193 | -2.935698093 | 0.461365 |
| 53.5    | 58.5    | 0.914737 | -0.202308175 | 0.854676 |
| 1176    | 1239.5  | 0.732624 | -0.599759503 | 0.693285 |
| 6699.99 | 9392.79 | 0.841314 | -0.447927685 | 0.62267  |
| 771     | 728     | 0.799655 | -0.388463226 | 0.845921 |
| 1009.5  | 996.5   | 0.691506 | -0.536481699 | 0.703343 |
| 39      | 35      | 0.893552 | 0.253756592  | 0.837799 |
| 27.5    | 23.5    | 0.869178 | -0.321928095 | 0.964086 |
| 315.001 | 364.5   | 0.715587 | -0.932890384 | 0.631177 |
| 321.5   | 242     | 0.489095 | -1.534259061 | 0.65816  |
| 3335.95 | 2956.71 | 0.714432 | -0.62419051  | 0.803223 |
| 173     | 99      | 0.619184 | 0.694654789  | 0.419035 |
| 3       | 7.5     | 0.713429 | -2.584962501 | 0.340442 |
| 1353.5  | 1221.5  | 0.784953 | -0.284836071 | 0.900493 |
| 2037    | 2104    | 0.626759 | -0.775484407 | 0.601048 |
| 421.499 | 165.5   | 0.917315 | -0.153327553 | 0.610562 |
| 2196.5  | 1997    | 0.705047 | -0.709210178 | 0.770585 |
| 495.5   | 618     | 0.887784 | -0.292745355 | 0.742688 |
| 1636    | 1673    | 0.9366   | -0.135828994 | 0.920716 |
| 124.5   | 181     | 0.907856 | -0.238902743 | 0.651548 |
| 1.5     | 3       | 1        | 0            | 0.523243 |
| 0.5     | 1.5     | 0.764931 | 1            | 0.764931 |
| 0       | 0       | ?        | #DIV/0!      | ?        |
| 90.5    | 40.5    | 0.670524 | 0.704725257  | 0.44275  |
| 103.5   | 137     | 0.655763 | -1.138898106 | 0.489481 |
| 457     | 551     | 0.639644 | -1.213998536 | 0.530762 |
| 356     | 347     | 0.674988 | -0.894532849 | 0.691322 |
| 1351.5  | 1530    | 0.972638 | -0.070549458 | 0.897332 |
| 3185    | 3320.62 | 0.93777  | -0.15450664  | 0.911821 |
| 1963.99 | 3406.98 | 0.965205 | -0.111824282 | 0.642797 |
| 112.5   | 127     | 0.620293 | -1.473931188 | 0.555611 |
| 980     | 1114.5  | 0.938721 | -0.152003093 | 0.855649 |
| 288.5   | 386.5   | 0.805829 | -0.60637347  | 0.630392 |
| 982.5   | 916     | 0.951337 | -0.106632848 | 0.997564 |
| 2084.5  | 2373.5  | 0.989246 | -0.026542705 | 0.907783 |
| 1706.02 | 1832.51 | 0.970383 | -0.06753386  | 0.922526 |
| 800.78  | 806.089 | 0.614586 | -0.860715618 | 0.609622 |
| 2006.98 | 2100.5  | 0.846816 | -0.293963105 | 0.809144 |
| 2731.5  | 2499.5  | 0.7303   | -0.486959332 | 0.807308 |
| 1661    | 1440.49 | 0.864588 | -0.242005721 | 0.980854 |
| 1478    | 1615    | 0.836904 | -0.439980073 | 0.781374 |
| 4161.48 | 3602.5  | 0.666196 | -0.794362891 | 0.766241 |
| 1913.18 | 1827.26 | 0.802559 | -0.351481472 | 0.842624 |
| 2383.56 | 2588.06 | 0.970781 | 0.065320384  | 0.975094 |
| 2106.51 | 2496.01 | 0.851438 | -0.350204493 | 0.729966 |
| 2142.52 | 1265.02 | 0.844158 | -0.252089427 | 0.761088 |
| 420     | 287.5   | 0.949577 | -0.084888898 | 0.776557 |
| 607.498 | 360.501 | 0.541908 | -1.2411113   | 0.852402 |

|         |         |          |              |          |
|---------|---------|----------|--------------|----------|
| 3453    | 3083    | 0.844603 | -0.240894156 | 0.952452 |
| 1213.99 | 1165.98 | 0.723826 | -0.51761016  | 0.758172 |
| 1792.5  | 1919.5  | 0.840599 | -0.362225185 | 0.791349 |
| 3053.5  | 3532.5  | 0.992665 | -0.016393088 | 0.891353 |
| 5241    | 4947    | 0.625726 | -0.718322272 | 0.674154 |
| 4400.84 | 5090.19 | 0.875008 | -0.302837184 | 0.774973 |
| 1202    | 1272    | 0.897749 | -0.222792559 | 0.856738 |
| 677     | 613.5   | 0.817374 | -0.343667563 | 0.897209 |
| 6343.5  | 5981    | 0.646296 | -0.563460927 | 0.703791 |
| 19811.5 | 20912.1 | 0.750075 | -0.523741289 | 0.707472 |
| 4884.5  | 4791    | 0.700761 | -0.630799538 | 0.715819 |
| 3541    | 3811    | 0.724383 | -0.582926808 | 0.666506 |
| 748     | 778.5   | 0.969242 | -0.070148256 | 0.94287  |
| 14627.5 | 15155.5 | 0.763648 | -0.466321249 | 0.734465 |
| 1.5     | 1.5     | 0.450185 | #NUM!        | 0.450185 |
| 2897.47 | 3093.94 | 0.74552  | -0.538773834 | 0.694095 |
| 4295    | 4554.5  | 0.90258  | -0.202314893 | 0.858225 |
| 1711.49 | 2097    | 0.894512 | -0.259752335 | 0.755426 |
| 654.001 | 696.001 | 0.784865 | -0.428345433 | 0.733937 |
| 724     | 752     | 0.913972 | -0.180173766 | 0.8859   |
| 1068.49 | 1201.48 | 0.97357  | -0.063472563 | 0.897565 |
| 252.5   | 285     | 0.771599 | -0.448758117 | 0.670064 |
| 875.5   | 916.5   | 0.775772 | -0.562075074 | 0.744878 |
| 290     | 301     | 0.834898 | -0.415037499 | 0.810543 |
| 1451    | 1650.5  | 0.899505 | -0.253125747 | 0.815508 |
| 3474    | 3895    | 0.82061  | -0.429506308 | 0.740172 |
| 4034.5  | 4588    | 0.902134 | -0.267367741 | 0.824339 |
| 1388.5  | 1387    | 0.834115 | -0.419025961 | 0.83481  |
| 1733.5  | 1730.5  | 0.810423 | -0.434729011 | 0.811647 |
| 2906.5  | 3212.5  | 0.849461 | -0.388398337 | 0.784501 |
| 3190.5  | 3144    | 0.770081 | -0.461213195 | 0.781832 |
| 2255.5  | 2154    | 0.66528  | -0.514436115 | 0.711744 |
| 964     | 903.5   | 0.788195 | -0.400148873 | 0.841746 |
| 5190.43 | 5312.91 | 0.800345 | -0.368658562 | 0.780247 |
| 238     | 552.5   | 0.739926 | -1.324962155 | 0.328268 |
| 818     | 1301    | 0.944023 | 0.142625145  | 0.744719 |
| 542     | 576     | 0.748044 | -0.493434406 | 0.697287 |
| 26.6215 | 31.2926 | 0.829408 | 0.380259326  | 0.927944 |
| 748.5   | 787     | 0.772321 | -0.262456287 | 0.706388 |
| 1503    | 1546.5  | 0.560194 | -1.596527252 | 0.544451 |
| 762     | 783     | 0.923078 | -0.15368701  | 0.902247 |
| 499.5   | 470.5   | 0.855582 | -0.283102456 | 0.90218  |
| 1.5     | 2       | 0.860525 | 0.415037499  | 1        |
| 2572.5  | 2446    | 0.637381 | -0.71056986  | 0.679029 |
| 755.5   | 838     | 0.702198 | -0.658909816 | 0.622936 |
| 1020.32 | 816.796 | 0.744019 | -0.50675297  | 0.914309 |
| 5372    | 5314    | 0.802202 | -0.314594981 | 0.812778 |
| 2119    | 1762    | 0.392492 | -0.848269267 | 0.579867 |
| 642     | 696.5   | 0.767474 | -0.646949388 | 0.716173 |
| 623     | 676     | 0.906989 | -0.219693272 | 0.851797 |
| 1.5     | 4.5     | 0.805463 | -1.584962501 | 0.360959 |
| 1264.5  | 824.5   | 0.464621 | -0.961165606 | 0.827339 |
| 63.5    | 60.5    | 0.900644 | -0.168505724 | 0.943069 |
| 830.005 | 782.491 | 0.71999  | -0.530820668 | 0.769518 |
| 2845.5  | 2578    | 0.585498 | -0.803367738 | 0.667239 |
| 1456.5  | 1742    | 0.699309 | -0.518186022 | 0.533509 |

|         |         |            |              |            |
|---------|---------|------------|--------------|------------|
| 334.589 | 375.124 | 0.744234   | -0.522456392 | 0.651213   |
| 833.5   | 914.5   | 0.947945   | -0.104055418 | 0.875903   |
| 2210.99 | 1567    | 0.187688   | -1.776207969 | 0.390719   |
| 1503    | 1739    | 0.79253    | -0.441189787 | 0.677677   |
| 467     | 416.5   | 0.719634   | -0.538603812 | 0.813425   |
| 5643.2  | 5003.34 | 0.438388   | -2.027138007 | 0.503835   |
| 942     | 844.007 | 0.6936     | -0.500207049 | 0.797733   |
| 681.5   | 563     | 0.592276   | -0.560820805 | 0.801221   |
| 767.997 | 778.998 | 0.858912   | -0.338216267 | 0.849417   |
| 1640.5  | 1660.5  | 0.720985   | -0.492567805 | 0.710031   |
| 87.5    | 84      | 0.211705   | -1.669851398 | 0.23297    |
| 2049.5  | 2979.5  | 0.776811   | -0.65232812  | 0.536046   |
| 1818.98 | 1545    | 0.301108   | -1.626790141 | 0.404155   |
| 761.5   | 622.499 | 0.00276569 | -2.469412418 | 0.00573329 |
| 3201    | 3036    | 0.871899   | -0.293920219 | 0.907422   |
| 1577.5  | 1220.5  | 0.381336   | -0.796875803 | 0.665443   |
| 1323.5  | 1309.5  | 0.761781   | -0.456505051 | 0.770658   |
| 129     | 144     | 0.803413   | -0.403896942 | 0.715129   |
| 30      | 10.5    | 0.132586   | -1.099535674 | 0.68405    |
| 0.5     | 0.5     | 1          | 0            | 1          |
| 0       | 0       | ?          | #DIV/0!      | ?          |
| 13.5    | 7.5     | 0.370757   | -1.169925001 | 0.847091   |
| 0.5     | 0       | 0.308068   | #NUM!        | 1          |
| 4       | 3       | 0.523243   | -2           | 0.663808   |
| 3.5     | 3       | 0.502754   | -1.807354922 | 0.586334   |
| 3.5     | 7.5     | 0.724378   | -1.807354922 | 0.388128   |
| 15      | 17.5    | 0.753258   | -0.658963082 | 0.650835   |
| 13.5    | 9       | 0.204691   | -1.94753258  | 0.439799   |
| 31      | 28.5    | 0.968585   | -0.071553261 | 0.979052   |
| 1.5     | 0.5     | 1          | 0            | 0.613399   |
| 2       | 4.5     | 0.725181   | 1            | 0.929192   |
| 21.5    | 20      | 0.710939   | -0.56828376  | 0.769807   |
| 1       | 3.5     | 1          | 0            | 0.47668    |
| 2.5     | 3.5     | 1          | 0            | 0.770719   |
| 8       | 15      | 0.971666   | 0.087462841  | 0.650673   |
| 24.5    | 18.5    | 0.973091   | 0.057715498  | 0.814278   |
| 3.5     | 3.5     | 0.418064   | 1.280107919  | 0.418064   |
| 9.5     | 8       | 0.340442   | -1.925999419 | 0.439799   |
| 5.5     | 7.5     | 0.951922   | 0.125530882  | 0.856852   |
| 1.5     | 5       | 0.919687   | 0.415037499  | 0.557935   |
| 24.5    | 21.5    | 0.559768   | -0.707819249 | 0.684867   |
| 58      | 91      | 0.890322   | -0.366127899 | 0.63248    |
| 15      | 12      | 0.612883   | -0.658963082 | 0.814626   |
| 7       | 4.5     | 0.633442   | -0.637429921 | 1          |
| 2       | 0.5     | 1          | 0            | 0.567924   |
| 9       | 6.5     | 1          | 0            | 0.810735   |
| 17      | 21.5    | 1          | 0            | 0.843802   |
| 25.5    | 24      | 0.807455   | -0.502500341 | 0.845108   |
| 3       | 7.5     | 0.900526   | 0.415037499  | 0.666873   |
| 14      | 17      | 0.812447   | -0.485426827 | 0.681235   |
| 1.5     | 1.5     | 0.613399   | -1.584962501 | 0.613399   |
| 5       | 2.5     | 0.918711   | -0.152003093 | 0.687418   |
| 20      | 31      | 0.865048   | -0.415037499 | 0.595552   |
| 16      | 16      | 0.970907   | -0.04580369  | 0.970907   |
| 3.5     | 5       | 0.682602   | -1.222392421 | 0.487603   |
| 12.5    | 13      | 0.680212   | -1.184424571 | 0.659511   |

|          |          |          |              |          |
|----------|----------|----------|--------------|----------|
| 2        | 1.5      | 0.545627 | -1           | 0.756486 |
| 8.5      | 10.5     | 0.72773  | 0.719892081  | 0.823484 |
| 1        | 0.5      | 1        | 0            | 0.622002 |
| 7        | 4.5      | 0.285001 | -1.807354922 | 0.562529 |
| 4.5      | 9        | 0.689169 | 0.91753784   | 0.95952  |
| 32       | 35       | 0.502544 | -0.678071905 | 0.412219 |
| 12       | 11.5     | 0.927607 | 0.169925001  | 0.903638 |
| 34.5     | 32.5     | 0.872005 | -0.250543462 | 0.91822  |
| 1        | 3        | 0.523243 | 2            | 0.825659 |
| 0.00064  | 7.10E-22 | 0.308068 | -36.3087837  | 1        |
| 4.5      | 14.5     | 1        | 0            | 0.472001 |
| 42       | 37.5     | 0.914082 | -0.106915204 | 0.956943 |
| 26       | 17.5     | 0.779585 | -0.2410081   | 0.753348 |
| 3        | 2        | 0.515664 | -1           | 0.822295 |
| 52       | 27       | 0.370307 | -1.145850866 | 0.905438 |
| 0.5      | 0.5      | 0.450185 | #NUM!        | 0.450185 |
| 8        | 7.5      | 0.741592 | -0.830074999 | 0.776864 |
| 0.5      | 0.5      | 0.450185 | #NUM!        | 0.450185 |
| 5.5      | 3.5      | 1        | 0            | 0.792666 |
| 43       | 44.5     | 0.921233 | 0.188445089  | 0.940858 |
| 0        | 1        | 1        | #DIV/0!      | 0.308068 |
| 62       | 38       | 0.729029 | -0.267695783 | 0.658361 |
| 1.5      | 5        | 0.915554 | 0.415037499  | 0.539077 |
| 1.5      | 1        | 0.756486 | -0.584962501 | 1        |
| 8        | 8        | 0.966851 | -0.093109404 | 0.966851 |
| 1        | 0        | 0.308068 | #NUM!        | 1        |
| 1        | 1        | 1        | 0            | 1        |
| 25.5     | 22       | 0.628759 | -0.765534746 | 0.744212 |
| 0.5      | 0        | 0.622002 | 1            | 0.353387 |
| 2        | 0.5      | 0.825659 | -0.415037499 | 0.663808 |
| 11       | 12.5     | 0.683721 | -0.7589919   | 0.591386 |
| 9.5      | 8        | 0.873378 | -0.247927513 | 1        |
| 42       | 29.5     | 0.641055 | -0.637429921 | 0.936802 |
| 10       | 8        | 0.550362 | -0.514573173 | 0.837425 |
| 11.5     | 5        | 0.252431 | -1.938599455 | 0.761346 |
| 63       | 47       | 0.365869 | -1.422691072 | 0.572118 |
| 0        | 0.5      | 1        | #DIV/0!      | 0.308068 |
| 0        | 0        | 0.308068 | #DIV/0!      | 0.308068 |
| 0.5      | 0        | 1        | 0            | 0.450185 |
| 49.5     | 19.5     | 0.418064 | -0.520832163 | 0.418064 |
| 8        | 9.5      | 0.913732 | -0.192645078 | 0.787726 |
| 105.5    | 31       | 0.32451  | -1.633636347 | 0.963755 |
| 2.5      | 0        | 0.3832   | -1.321928095 | 0.545627 |
| 0        | 0        | ?        | #DIV/0!      | ?        |
| 62       | 9        | 0.567889 | -0.976916387 | 0.66921  |
| 11.5     | 9.5      | 0.545226 | -1.064130337 | 0.681051 |
| 3.5      | 4.5      | 0.697501 | 0.652076697  | 0.844258 |
| 3        | 3.5      | 0.811936 | 0.415037499  | 0.904922 |
| 2.13E-18 | 4.64E-29 | 0.308068 | 39.84560421  | 0.308068 |
| 1        | 2        | 0.530478 | 1            | 1        |
| 0        | 0        | ?        | #DIV/0!      | ?        |
| 2        | 1.5      | 0.545627 | -1           | 0.756486 |
| 0.5      | 1        | 0.436998 | 2.321928095  | 0.550362 |
| 8        | 7        | 0.963774 | -0.093109404 | 0.963774 |
| 6        | 4        | 0.3646   | -2.584962501 | 0.567924 |
| 1        | 0.5      | 0.651448 | 0.584962501  | 0.391002 |

|         |        |          |              |          |
|---------|--------|----------|--------------|----------|
| 0.5     | 1.5    | 0.724378 | #NUM!        | 0.329316 |
| 1       | 0      | 0        | #NUM!        | ?        |
| 3.5     | 5      | 0.590801 | -2.807354922 | 0.434451 |
| 1.5     | 0.5    | 0.724378 | -0.584962501 | 0.724378 |
| 1       | 0      | 0.320255 | 2.321928095  | 0.234161 |
| 0       | 1      | 0.622002 | #DIV/0!      | 0.622002 |
| 0       | 1      | 1        | #DIV/0!      | 0.308068 |
| 14.5    | 3      | 0.307066 | -1.688055994 | 0.865624 |
| 0       | 0      | 0.308068 | #DIV/0!      | 0.308068 |
| 1.5     | 2      | 0.438509 | #NUM!        | 0.320255 |
| 7       | 11.5   | 0.885583 | -0.222392421 | 0.452693 |
| 1       | 0      | 0.308068 | #NUM!        | 1        |
| 0       | 0      | ?        | #DIV/0!      | ?        |
| 0       | 0.5    | 1        | #DIV/0!      | 0.308068 |
| 3       | 4      | 0.818729 | -0.584962501 | 0.651448 |
| 9       | 4.5    | 0.544734 | -1           | 1        |
| 0       | 0.5    | 0.353387 | #DIV/0!      | 0.622002 |
| 1       | 1      | 0.438509 | 1.321928095  | 0.438509 |
| 0.5     | 1.5    | 0.513713 | 1.584962501  | 1        |
| 0.5     | 0      | 0.438509 | 2            | 0.320255 |
| 19      | 28.5   | 0.932675 | 0.178337241  | 0.813853 |
| 0.5     | 0      | 0.308068 | #NUM!        | 1        |
| 2       | 0      | 0.198892 | -2           | 0.622002 |
| 0       | 0.5    | 0.450185 | #DIV/0!      | 1        |
| 10.5    | 8      | 0.892135 | -0.070389328 | 0.596819 |
| 0       | 0      | ?        | #DIV/0!      | ?        |
| 0.5     | 0      | 0.308068 | #NUM!        | 1        |
| 5.5     | 5      | 0.654665 | -0.652076697 | 0.735184 |
| 6.5     | 6      | 0.697714 | -0.700439718 | 0.754799 |
| 5.5     | 7      | 0.821861 | 0.447458977  | 0.954909 |
| 10.5    | 0.5    | 0.333951 | -2.070389328 | 0.792666 |
| 94      | 63.5   | 0.732643 | -0.214738849 | 0.648492 |
| 12      | 6.5    | 0.899289 | 0.115477217  | 0.437078 |
| 1.5     | 1.5    | 0.764931 | -0.584962501 | 0.764931 |
| 10.5    | 14     | 0.577083 | -0.584962501 | 0.300815 |
| 5.5     | 5      | 1        | 0            | 0.923545 |
| 215     | 152    | 0.728113 | -0.334564921 | 0.883997 |
| 80.5    | 66     | 0.761992 | -0.485426827 | 0.910208 |
| 0.5     | 0      | 0.308068 | #NUM!        | 1        |
| 0       | 1      | 0.308068 | #DIV/0!      | 1        |
| 0       | 0      | ?        | #DIV/0!      | ?        |
| 2.5     | 3      | 0.78878  | -0.736965594 | 0.690256 |
| 14.5    | 10     | 0.905708 | -0.103093493 | 0.682853 |
| 3       | 1      | 0.544016 | -1           | 0.834708 |
| 898     | 943.5  | 0.71199  | -0.686450323 | 0.676619 |
| 2145.5  | 2073.5 | 0.534116 | -0.578755908 | 0.573833 |
| 271     | 262    | 0.749975 | -0.406192008 | 0.782387 |
| 3509.48 | 3409   | 0.562595 | -0.66230366  | 0.591668 |
| 470     | 388    | 0.386011 | -0.783759806 | 0.596184 |
| 2514    | 2486   | 0.511934 | -0.679679621 | 0.523584 |
| 9126    | 11393  | 0.238909 | -0.766135599 | 0.100318 |
| 2416    | 1901.5 | 0.609182 | -0.483934744 | 0.894779 |
| 3345.5  | 3228.5 | 0.574874 | -0.676304926 | 0.60928  |
| 4321    | 4294   | 0.307718 | -0.705917387 | 0.314247 |
| 10141   | 8351   | 0.177448 | -0.768632302 | 0.388842 |
| 5446    | 4606.5 | 0.182936 | -0.794432423 | 0.352729 |



|         |         |          |              |           |
|---------|---------|----------|--------------|-----------|
| 5317.5  | 6245.5  | 0.186992 | -0.726602656 | 0.0912645 |
| 2754    | 3003.46 | 0.751246 | 0.533988521  | 0.799675  |
| 124     | 121     | 0.904225 | -0.172836597 | 0.924639  |
| 141.5   | 92.5    | 0.946358 | -0.111235241 | 0.806154  |
| 17.5    | 19      | 0.865898 | 0.296981738  | 0.915806  |
| 0.5     | 0.5     | 1        | 0            | 1         |
| 1106.51 | 1072.5  | 0.665884 | -0.427057413 | 0.702823  |
| 2923.5  | 2646.5  | 0.69746  | -0.508207219 | 0.78968   |
| 3659.5  | 3455    | 0.648585 | -0.539368263 | 0.706573  |
| 726.999 | 851.995 | 0.517486 | -1.519973324 | 0.423423  |
| 491     | 540     | 0.684323 | -0.425851618 | 0.577225  |
| 7823    | 7690    | 0.533594 | -0.748321083 | 0.549769  |
| 760.003 | 886.496 | 0.975835 | -0.061076141 | 0.879502  |
| 1734.49 | 1850.52 | 0.873744 | -0.279021088 | 0.826743  |
| 286.5   | 211     | 0.912909 | -0.128968327 | 0.820569  |
| 4765.5  | 4754    | 0.705994 | -0.505669948 | 0.708223  |
| 864     | 788.5   | 0.636235 | -0.887608762 | 0.699653  |
| 1270    | 1148.5  | 0.837312 | -0.377659889 | 0.9042    |
| 1987    | 2017    | 0.659781 | -0.641792913 | 0.646938  |
| 77.9443 | 81.2974 | 0.90975  | 0.153568501  | 0.944201  |
| 491.279 | 459.147 | 0.517147 | -0.743565527 | 0.583127  |
| 54.5    | 55      | 0.816864 | -0.325240829 | 0.808786  |
| 222.5   | 219     | 0.78356  | -0.405344103 | 0.79697   |
| 931.5   | 981     | 0.822535 | -0.423581075 | 0.786747  |
| 2872.04 | 2937.95 | 0.633615 | -0.56157896  | 0.610752  |
| 129.5   | 134.5   | 0.921559 | -0.1776045   | 0.895618  |
| 74.5    | 88      | 0.964398 | 0.084612228  | 0.928907  |
| 2178.5  | 2274    | 0.70439  | -0.453854741 | 0.660686  |
| 580.5   | 617     | 0.773461 | -0.517594153 | 0.728856  |
| 1232    | 1093.5  | 0.848973 | -0.256258435 | 0.952896  |
| 2220    | 2125    | 0.840199 | -0.267329888 | 0.880069  |
| 542     | 479.501 | 0.686282 | -0.586294014 | 0.789641  |
| 2585.5  | 3071.99 | 0.867186 | -0.241160288 | 0.712977  |
| 915     | 1018    | 0.701432 | -0.581419245 | 0.611426  |
| 284     | 322     | 0.7883   | -0.549834277 | 0.70448   |
| 1283    | 1293.5  | 0.987283 | -0.027242887 | 0.98172   |
| 954     | 1136    | 0.982706 | -0.043756276 | 0.873104  |
| 967     | 760     | 0.835269 | -0.376275464 | 0.988744  |
| 261     | 226.5   | 0.60773  | -0.564381623 | 0.75756   |
| 152     | 164.5   | 0.894685 | -0.220021517 | 0.834586  |
| 318     | 534     | 0.90044  | 0.164875311  | 0.575146  |
| 73      | 57.5    | 0.796513 | -0.356934545 | 0.99353   |
| 457.5   | 381.5   | 0.609944 | -0.755478892 | 0.758752  |
| 581.5   | 569     | 0.666588 | 0.696713427  | 0.656165  |
| 426.5   | 451.5   | 0.936271 | -0.145814881 | 0.897683  |
| 607     | 533.5   | 0.707454 | -0.581994602 | 0.810104  |
| 5987.9  | 5145.05 | 0.300087 | -0.845449582 | 0.456397  |
| 1975.5  | 1995    | 0.506837 | -0.747716526 | 0.497361  |
| 11      | 14      | 0.921239 | -0.137503524 | 0.696428  |
| 798.12  | 1158.4  | 0.550569 | -1.302889021 | 0.323264  |
| 1394.5  | 1315    | 0.818804 | -0.378097858 | 0.862802  |
| 2502    | 2590    | 0.894966 | -0.266845105 | 0.873354  |
| 1267.5  | 1590    | 0.735551 | -0.799975392 | 0.595415  |
| 1791.5  | 1462.5  | 0.714299 | -0.640789246 | 0.856862  |
| 2704.5  | 4012.5  | 0.98938  | 0.029567704  | 0.7679    |
| 417     | 436     | 0.825639 | -0.477491381 | 0.798327  |

|         |         |          |              |          |
|---------|---------|----------|--------------|----------|
| 988.5   | 306.5   | 0.917419 | 0.165946494  | 0.507581 |
| 1743.5  | 1538    | 0.557692 | -0.73503612  | 0.674558 |
| 2522.99 | 2743.99 | 0.985889 | -0.034132232 | 0.933137 |
| 1411.5  | 1635.5  | 0.876619 | -0.332442851 | 0.784358 |
| 2198    | 2243    | 0.81812  | -0.454067597 | 0.804749 |
| 10.5    | 10      | 1        | 0            | 0.971162 |
| 202     | 245.5   | 0.677218 | -0.453640339 | 0.469363 |
| 178.5   | 188.5   | 0.925723 | 0.145928579  | 0.964754 |
| 25533.3 | 29102.5 | 0.911792 | -0.188533525 | 0.813274 |
| 7389    | 7022.5  | 0.631193 | -0.804550944 | 0.669862 |
| 2010.5  | 1960    | 0.844118 | -0.295618979 | 0.864909 |
| 36      | 6       | 0.85147  | 0.20511443   | 0.279647 |
| 133.5   | 178.5   | 0.678854 | -0.941754859 | 0.493287 |
| 2881.44 | 2017.09 | 0.611786 | -0.517170491 | 0.998227 |
| 244.562 | 212.913 | 0.23651  | -1.332334676 | 0.330365 |
| 1.5     | 2.5     | 0.329316 | #NUM!        | 0.14822  |
| 889.996 | 992.997 | 0.999265 | -0.001607319 | 0.923082 |
| 228.5   | 272     | 0.829735 | 0.416615077  | 0.925828 |
| 97.5549 | 134.085 | 0.634723 | -1.301577598 | 0.453538 |
| 4044    | 4299    | 0.910238 | -0.174172107 | 0.861119 |
| 3872.22 | 4213.47 | 0.72789  | -0.611209321 | 0.664351 |
| 213.396 | 201.545 | 0.840653 | -0.326429249 | 0.883779 |
| 1071    | 919.5   | 0.736353 | -0.534336428 | 0.85385  |
| 2205    | 2387    | 0.888729 | -0.250915774 | 0.832307 |
| 1080    | 1082.5  | 0.998498 | 0.003335713  | 1        |
| 201.104 | 135.955 | 0.837692 | -0.300284473 | 0.881878 |
| 3.5     | 3       | 0.481309 | -0.807354922 | 0.630057 |
| 128     | 136     | 0.99234  | -0.017006425 | 0.951532 |
| 135.5   | 155     | 0.758136 | 0.597331058  | 0.82393  |
| 285     | 309.5   | 0.816689 | 0.394003799  | 0.865989 |
| 5930.58 | 6028.46 | 0.843984 | -0.368472595 | 0.832814 |
| 1       | 0.5     | 0.353387 | #NUM!        | 0.622002 |
| 41791.5 | 42521.5 | 0.865413 | -0.223592534 | 0.849328 |
| 264.5   | 357.5   | 0.690408 | -0.917840895 | 0.499025 |
| 1630.02 | 1608.52 | 0.795858 | -0.444285843 | 0.805692 |
| 58.5    | 63      | 0.951474 | 0.106915204  | 1        |
| 1717.5  | 2026    | 0.972095 | -0.069696497 | 0.866756 |
| 0       | 0.5     | 1        | #DIV/0!      | 0.308068 |
| 92.5    | 83      | 0.976901 | 0.038474148  | 0.889656 |
| 236     | 246.5   | 0.753067 | -0.560714954 | 0.721028 |
| 467     | 467     | 0.789683 | -0.464266716 | 0.789683 |
| 1639.5  | 1594.5  | 0.744176 | -0.479981363 | 0.767821 |
| 125.5   | 163.5   | 0.944934 | -0.13865354  | 0.768012 |
| 28.3362 | 24.5114 | 0.662446 | -0.482823425 | 0.816237 |
| 1026.5  | 983.5   | 0.76337  | -0.472136452 | 0.797579 |
| 681.5   | 642.5   | 0.73034  | -0.484791885 | 0.782028 |
| 976.495 | 1003.51 | 0.908354 | -0.226691963 | 0.891076 |
| 95.5    | 92      | 0.775932 | -0.448145811 | 0.805652 |
| 2124    | 2027.5  | 0.669007 | -0.625779156 | 0.708508 |
| 992.499 | 995.5   | 0.791411 | -0.418674623 | 0.788998 |
| 774.5   | 780     | 0.627002 | -0.693239583 | 0.620888 |
| 1998    | 2270    | 0.453441 | -0.665705461 | 0.324575 |
| 2917.5  | 2193    | 0.328938 | -0.688742959 | 0.714488 |
| 984.501 | 908.003 | 0.830631 | -0.21618441  | 0.924478 |
| 28.5    | 31.5    | 0.760055 | -0.341036918 | 0.650396 |
| 26.824  | 46.0192 | 0.770589 | 0.51629269   | 0.845985 |

|         |         |          |              |          |
|---------|---------|----------|--------------|----------|
| 2369    | 1788.5  | 0.765168 | -0.494100493 | 0.962759 |
| 4754.08 | 5087.22 | 0.977677 | -0.056034726 | 0.936704 |
| 8738.78 | 8608.95 | 0.876534 | -0.317472157 | 0.885717 |
| 1.5     | 10      | 0.814065 | #NUM!        | 0.185644 |
| 3175    | 3398.52 | 0.896786 | -0.259942402 | 0.853381 |
| 226.5   | 259.5   | 0.886512 | -0.253511632 | 0.786862 |
| 1531.5  | 1438    | 0.824861 | -0.301119071 | 0.8808   |
| 8231    | 7634    | 0.72592  | -0.577314492 | 0.783544 |
| 1033    | 1066    | 0.468721 | -0.852753202 | 0.440623 |
| 32      | 50      | 0.622379 | -1.830074999 | 0.401355 |
| 39      | 66.5    | 0.716258 | -0.584962501 | 0.30164  |
| 0       | 0.5     | 1        | #DIV/0!      | 0.308068 |
| 1149.13 | 1179.3  | 0.999162 | 0.001932125  | 0.984423 |
| 0       | 0       | ?        | #DIV/0!      | ?        |
| 33.5    | 20.5    | 0.948351 | -0.088809267 | 0.72467  |
| 0       | 0       | ?        | #DIV/0!      | ?        |
| 1       | 0       | 0.622002 | -1           | 0.622002 |
| 4087.5  | 4183    | 0.984076 | 0.031421098  | 0.999027 |
| 2545.28 | 2591.61 | 0.753644 | -0.442850949 | 0.737618 |
| 1048.49 | 1696.52 | 0.817422 | -0.590109558 | 0.525949 |
| 4768    | 3178    | 0.451566 | -0.994563839 | 0.793995 |
| 102.5   | 66      | 0.435466 | -1.979040381 | 0.670777 |
| 6       | 12.5    | 0.912929 | -0.263034406 | 0.438509 |
| 9.5     | 12.5    | 0.910366 | -0.247927513 | 0.737968 |
| 11066   | 6060.5  | 0.87917  | -0.220210344 | 0.740648 |
| 1468.5  | 1354    | 0.547036 | -1.269829132 | 0.598659 |
| 643.499 | 902.499 | 0.741279 | -0.866269723 | 0.542555 |
| 19      | 22.5    | 0.702752 | 0.634715536  | 0.797674 |
| 1794    | 1680    | 0.766829 | -0.435555215 | 0.821965 |
| 349     | 422     | 0.966153 | -0.082948571 | 0.84105  |
| 21      | 43      | 1        | 0            | 0.136713 |
| 3.5     | 7.5     | 0.831194 | -0.807354922 | 0.456799 |
| 5010.12 | 5394.43 | 0.95941  | -0.078020589 | 0.900606 |
| 3073.5  | 3652    | 0.89632  | -0.276474663 | 0.787529 |
| 1148.5  | 1192    | 0.676179 | -0.520777549 | 0.639865 |
| 661.501 | 812.002 | 0.88694  | -0.279487108 | 0.746516 |
| 1170    | 1300.5  | 0.929251 | -0.167153252 | 0.858019 |
| 2241.01 | 2269.98 | 0.872563 | -0.221533244 | 0.861165 |
| 100     | 78      | 0.63332  | -1.089267338 | 0.777168 |
| 1142.5  | 961     | 0.601506 | -0.619789518 | 0.771904 |
| 372.5   | 267.5   | 0.869108 | -0.221424494 | 0.871544 |
| 1361.5  | 1244.5  | 0.76004  | -0.423006743 | 0.839015 |
| 273.5   | 341.5   | 0.479272 | -1.611581246 | 0.350304 |
| 28284.1 | 28244.6 | 0.7049   | -0.756364281 | 0.705836 |
| 1027.5  | 776     | 0.67002  | -0.680742132 | 0.879884 |
| 28310.5 | 31744.5 | 0.703488 | -0.80699188  | 0.628251 |
| 97      | 97.5    | 0.618194 | -1.156969346 | 0.615067 |
| 770.5   | 760     | 0.900699 | -0.18877171  | 0.911657 |
| 982.5   | 1023    | 0.882115 | -0.278535499 | 0.854873 |
| 19      | 16.5    | 0.559891 | -0.925999419 | 0.66902  |
| 544.5   | 512     | 0.240928 | -0.80338602  | 0.298618 |
| 438     | 485.5   | 0.889048 | -0.274941173 | 0.821187 |
| 1301    | 1338    | 0.572593 | -1.144506642 | 0.554042 |
| 211.5   | 210.5   | 0.912589 | -0.158459815 | 0.916539 |
| 1948    | 1271.5  | 0.46373  | -0.767906625 | 0.902737 |
| 2008.5  | 1878    | 0.364823 | -0.637070818 | 0.44761  |

|         |         |          |              |          |
|---------|---------|----------|--------------|----------|
| 1252.5  | 1226    | 0.837109 | -0.31474692  | 0.854366 |
| 4395.01 | 3497.5  | 0.795841 | -0.396502204 | 0.968808 |
| 3138    | 2587    | 0.820617 | -0.401917839 | 0.949537 |
| 209     | 250.5   | 0.921031 | -0.160464672 | 0.776249 |
| 27.5    | 32      | 0.754548 | 0.447458977  | 0.862594 |
| 2201    | 2186.5  | 0.736849 | -0.487854116 | 0.742553 |
| 10075.1 | 10013   | 0.692245 | -0.702496198 | 0.696787 |
| 1066    | 1264    | 0.911495 | -0.228268988 | 0.801801 |
| 129.5   | 114.5   | 0.597571 | -0.633103995 | 0.718193 |
| 1787.5  | 1882.5  | 0.753823 | -0.502803036 | 0.712199 |
| 612     | 500     | 0.790616 | -0.280107919 | 0.992101 |
| 2859.5  | 3125.5  | 0.959678 | -0.09676344  | 0.902179 |
| 2530    | 2144.5  | 0.869862 | -0.321571742 | 0.968901 |
| 6832.83 | 6255.51 | 0.721218 | -0.647248735 | 0.783477 |
| 54.0608 | 49.1843 | 0.235058 | -1.439069398 | 0.293696 |
| 2341.5  | 2135    | 0.575284 | -0.621938704 | 0.671109 |
| 64      | 70      | 0.674964 | 0.665335917  | 0.723367 |
| 1484.78 | 1423.68 | 0.652177 | -0.747866547 | 0.684467 |
| 2.5     | 3       | 1        | 0            | 0.892901 |
| 3084    | 2861.5  | 0.689857 | -0.43893622  | 0.770771 |
| 1117.5  | 1019    | 0.8006   | -0.271190733 | 0.901926 |
| 1415    | 1427    | 0.854718 | -0.266300732 | 0.847545 |
| 4249.5  | 4404.5  | 0.802319 | -0.385078851 | 0.772769 |
| 6035.54 | 5632.61 | 0.728902 | -0.450033924 | 0.793682 |
| 2229.5  | 2087    | 0.766703 | -0.332970839 | 0.837121 |
| 2857.5  | 3118.5  | 0.838005 | -0.351576832 | 0.772104 |
| 1504.01 | 1621    | 0.921833 | -0.180113166 | 0.870601 |
| 7971.5  | 8755    | 0.821904 | -0.364678763 | 0.747073 |
| 3857.5  | 4223    | 0.559799 | -0.904321652 | 0.488727 |
| 199.5   | 176.5   | 0.93024  | -0.132450296 | 0.978036 |
| 510     | 397     | 0.660707 | -0.434020603 | 0.947559 |
| 922.786 | 957.541 | 0.477561 | -0.608407736 | 0.435402 |
| 8087.63 | 7965.7  | 0.889296 | -0.244864699 | 0.899895 |
| 567     | 506.5   | 0.400289 | -2.252387162 | 0.459817 |
| 489.5   | 412.5   | 0.528442 | -1.431339312 | 0.630891 |
| 9067.62 | 8777.78 | 0.780312 | -0.410099944 | 0.807763 |
| 4477.5  | 4684.5  | 0.745867 | -0.43411983  | 0.703716 |
| 4659.99 | 4614.93 | 0.857302 | -0.299492411 | 0.864548 |
| 15960.5 | 14820   | 0.436478 | -0.716814077 | 0.517102 |
| 1913.51 | 1438.99 | 0.572197 | -0.682244272 | 0.842765 |
| 10571.4 | 9938.68 | 0.720055 | -0.602746084 | 0.76668  |
| 5489.52 | 5732.57 | 0.7892   | -0.385607278 | 0.75129  |
| 8486    | 8278.5  | 0.839267 | -0.313410345 | 0.859042 |
| 7240.23 | 7092.98 | 0.642271 | -0.551939248 | 0.662919 |
| 6048.11 | 5693.99 | 0.855403 | -0.255184573 | 0.907151 |
| 397     | 331.5   | 0.485081 | -1.14917942  | 0.617226 |
| 831.739 | 708.438 | 0.181139 | -0.775899065 | 0.345497 |
| 15.5    | 13      | 0.872456 | -0.253756592 | 1        |
| 1747.02 | 1681.01 | 0.755105 | -0.448898845 | 0.788325 |
| 2122    | 1802.5  | 0.396253 | -0.628093031 | 0.610849 |
| 586     | 559     | 0.998147 | 0.003688187  | 0.964804 |
| 7139.8  | 6514.41 | 0.706728 | -0.619900718 | 0.776752 |
| 84.5    | 81.5    | 0.936367 | -0.162474697 | 0.957539 |
| 846.5   | 952.5   | 0.947427 | -0.124524144 | 0.868609 |
| 1219.5  | 1269.5  | 0.884487 | -0.280530489 | 0.858091 |
| 1624.99 | 1502.5  | 0.978778 | 0.045899127  | 0.929422 |

|         |         |          |              |          |
|---------|---------|----------|--------------|----------|
| 251     | 202     | 0.738916 | -0.397896366 | 0.948968 |
| 25      | 36      | 0.970149 | 0.056583528  | 0.711819 |
| 7.5     | 6.5     | 0.96308  | 0.093109404  | 0.889735 |
| 8292    | 8623    | 0.816053 | -0.310684655 | 0.779549 |
| 6519    | 6133.5  | 0.739854 | -0.362238158 | 0.806618 |
| 5647.5  | 5345    | 0.665675 | -0.414739497 | 0.732546 |
| 10004.2 | 9589.96 | 0.655377 | -0.593026809 | 0.6942   |
| 15.5    | 26.5    | 0.211765 | 2.480431917  | 0.273557 |
| 89.825  | 160.456 | 0.88226  | 0.276357015  | 0.690452 |
| 656.998 | 802.502 | 0.79297  | -0.589913935 | 0.666613 |
| 21.5    | 22      | 0.522082 | -1.178337241 | 0.506222 |
| 320     | 313.5   | 0.430375 | -1.45774195  | 0.443677 |
| 331.5   | 245.5   | 0.666144 | 0.615819627  | 0.529468 |
| 1848.5  | 1542    | 0.541445 | -0.631761    | 0.738819 |
| 1092.51 | 743.998 | 0.932999 | -0.106152544 | 0.770444 |
| 5173    | 4871.5  | 0.807686 | -0.31754226  | 0.863367 |
| 7385    | 6246    | 0.961461 | 0.070900881  | 0.844924 |
| 498.5   | 590.5   | 0.490181 | -2.54359718  | 0.408392 |
| 4569.5  | 4402.5  | 0.812461 | -0.433093596 | 0.838274 |
| 481     | 479.5   | 0.759916 | -0.477351183 | 0.762449 |
| 775     | 854     | 0.798231 | -0.523913714 | 0.734169 |
| 2288    | 2136.01 | 0.63586  | -0.669000409 | 0.695512 |
| 360.267 | 366.253 | 0.512699 | -1.517212273 | 0.502841 |
| 1260    | 1435.5  | 0.99184  | -0.016698712 | 0.893632 |
| 2928    | 3357    | 0.852187 | -0.319097712 | 0.747612 |
| 734.5   | 917     | 0.987802 | -0.02776406  | 0.830811 |
| 653.499 | 747.002 | 0.942755 | -0.149914945 | 0.860704 |
| 54      | 65.5    | 0.947098 | 0.127755547  | 0.931283 |
| 2858    | 4484    | 0.898801 | -0.242684064 | 0.564143 |
| 114     | 171.5   | 0.785484 | -0.673018677 | 0.534304 |
| 552.998 | 497.999 | 0.605426 | -0.440481284 | 0.744177 |
| 469     | 512.5   | 0.812099 | 0.385121921  | 0.868067 |
| 557.5   | 518     | 0.658597 | -0.537865494 | 0.731005 |
| 523.5   | 537.5   | 0.606435 | -0.952560943 | 0.587695 |
| 1453.02 | 1515.51 | 0.899486 | -0.206776278 | 0.867519 |
| 1301    | 1572.99 | 0.591368 | -1.650173475 | 0.490838 |
| 4939    | 4131    | 0.462772 | -1.448229271 | 0.577557 |
| 57.5859 | 80.2418 | 0.617705 | -1.53595169  | 0.439957 |
| 101.5   | 133     | 0.8776   | -0.361555169 | 0.714542 |
| 354.5   | 244     | 0.567934 | -1.294716135 | 0.781657 |
| 281     | 163     | 0.902066 | 0.209869588  | 0.656185 |
| 639     | 848     | 0.882957 | -0.352445862 | 0.714772 |
| 73.5    | 129     | 0.906779 | -0.354182294 | 0.609327 |
| 212     | 246.5   | 0.77247  | -0.645771413 | 0.677436 |
| 1874.51 | 2022.51 | 0.915219 | -0.194111434 | 0.862715 |
| 3218.59 | 3220.52 | 0.953895 | -0.096622187 | 0.95347  |
| 676     | 761     | 0.900983 | -0.246061327 | 0.823182 |
| 1195    | 1120    | 0.811801 | -0.425133377 | 0.857176 |
| 744.5   | 810.009 | 0.853567 | -0.352766067 | 0.795923 |
| 965.5   | 870     | 0.826176 | -0.333931867 | 0.908552 |
| 317     | 308     | 0.677718 | -0.686287211 | 0.70001  |
| 5       | 6.5     | 0.763415 | -0.736965594 | 0.604571 |
| 64.0186 | 76.5    | 0.76643  | -0.591028286 | 0.642885 |
| 2090    | 2266    | 0.298502 | -1.636969804 | 0.253278 |
| 685     | 867.5   | 0.651914 | -1.227667363 | 0.517489 |
| 1166    | 1134.5  | 0.749811 | -0.456033042 | 0.773636 |

|         |         |          |              |          |
|---------|---------|----------|--------------|----------|
| 849     | 819.5   | 0.798298 | -0.306504833 | 0.833991 |
| 785     | 858     | 0.625367 | -0.866679416 | 0.55986  |
| 652.5   | 608.5   | 0.839892 | -0.188702208 | 0.927337 |
| 1211.5  | 1619    | 0.804582 | -0.521479501 | 0.608781 |
| 304.5   | 404.5   | 0.801591 | -0.642968104 | 0.63592  |
| 1067.26 | 1124.58 | 0.838751 | -0.363328238 | 0.801004 |
| 3307.91 | 3547.36 | 0.803939 | -0.43957699  | 0.752361 |
| 5.23407 | 3.93032 | 0.526985 | -1.964451858 | 0.667476 |
| 2457.53 | 2902.01 | 0.740667 | -0.519429539 | 0.602512 |
| 6098.49 | 6785.47 | 0.818106 | -0.437248448 | 0.743392 |
| 3024    | 3506.99 | 0.775798 | -0.511679509 | 0.665222 |
| 78      | 68.5    | 0.753536 | 0.469485283  | 0.681336 |
| 404.498 | 401.499 | 0.484645 | 1.172121166  | 0.482292 |
| 156.5   | 167     | 0.956984 | -0.105143504 | 0.916103 |
| 59.5    | 102     | 0.878812 | -0.324962155 | 0.505999 |
| 1       | 1.5     | 0.116158 | 1.584962501  | 0.198892 |
| 375     | 386     | 0.881005 | -0.279283757 | 0.861464 |
| 1154.5  | 866     | 0.879953 | -0.197921001 | 0.885969 |
| 717     | 706.5   | 0.983369 | -0.037713003 | 0.992808 |
| 352.5   | 607.5   | 0.809036 | -0.650907813 | 0.487588 |
| 874.5   | 821     | 0.801901 | -0.399449514 | 0.85094  |
| 697.501 | 685.5   | 0.94709  | -0.11066112  | 0.9594   |
| 2154.5  | 2286    | 0.572209 | -0.602986948 | 0.51031  |
| 220     | 348.5   | 0.474532 | 1.162620201  | 0.695611 |
| 225.5   | 277.5   | 0.977751 | -0.048799298 | 0.825681 |
| 625.002 | 637.996 | 0.969076 | -0.066122625 | 0.954744 |
| 5415.34 | 5626.97 | 0.813758 | -0.427002563 | 0.786351 |
| 22      | 17      | 0.93971  | -0.101879614 | 0.860251 |
| 68.5    | 341.501 | 0.825052 | -1.215389034 | 0.1494   |
| 16.5    | 37      | 0.97329  | -0.090197809 | 0.491547 |
| 240     | 148.5   | 0.552585 | -1.024247546 | 0.878203 |
| 863.493 | 761.998 | 0.963981 | -0.074550016 | 0.951973 |
| 1077.5  | 1219    | 0.880828 | -0.288019686 | 0.796695 |
| 441.999 | 552     | 0.967411 | 0.077837068  | 0.886832 |
| 820     | 785     | 0.961184 | -0.080497128 | 0.991708 |
| 4049    | 3635.5  | 0.785651 | -0.416344557 | 0.871382 |
| 3152.51 | 3120.96 | 0.763111 | -0.48022286  | 0.771113 |
| 72875.2 | 48906.8 | 0.286605 | -1.060680466 | 0.666535 |
| 8791.8  | 5990.54 | 0.200241 | -2.239297747 | 0.401465 |
| 5127.62 | 4043.36 | 0.371192 | -2.285168359 | 0.497373 |
| 1712.29 | 1439.27 | 0.291449 | -2.379767574 | 0.380783 |
| 54      | 85      | 0.468998 | -0.688798312 | 0.129378 |
| 1250    | 1029    | 0.498481 | -0.877261028 | 0.670489 |
| 2651    | 2548.5  | 0.519204 | -0.572634594 | 0.566434 |
| 3       | 7       | 0.943021 | 0.222392421  | 0.62469  |
| 1552.5  | 1616.5  | 0.874793 | 0.300111932  | 0.896897 |
| 1214.5  | 1255    | 0.896192 | -0.276760253 | 0.87659  |
| 4466.5  | 5394    | 0.888674 | 0.214503449  | 0.966961 |
| 11      | 8       | 0.645927 | -1           | 0.831967 |
| 2343.02 | 2534.04 | 0.841348 | -0.331911403 | 0.780572 |
| 654     | 728.5   | 0.913553 | -0.198328716 | 0.838155 |
| 4881.5  | 4632    | 0.59726  | -0.62147701  | 0.649568 |
| 2560.49 | 2283.01 | 0.864944 | -0.258809128 | 0.95376  |
| 501.5   | 610.5   | 0.957664 | -0.110571104 | 0.834713 |
| 2593.48 | 2659.56 | 0.848802 | -0.329446273 | 0.830356 |
| 125     | 161.5   | 0.995559 | -0.011587974 | 0.83533  |

|         |         |          |              |           |
|---------|---------|----------|--------------|-----------|
| 11060.5 | 11293   | 0.748244 | -0.425926474 | 0.728761  |
| 9328.91 | 9144.22 | 0.925099 | -0.144633052 | 0.940593  |
| 2829    | 2487    | 0.648585 | -0.584580077 | 0.768941  |
| 3.5     | 2.5     | 0.639236 | -0.807354922 | 0.873517  |
| 1660.5  | 1550    | 0.600897 | -0.7965352   | 0.656815  |
| 2148    | 2195    | 0.791901 | -0.471656849 | 0.776226  |
| 696.5   | 719.5   | 0.798901 | -0.449626106 | 0.775084  |
| 639     | 575.5   | 0.829474 | -0.276644837 | 0.925862  |
| 2230    | 1913.5  | 0.441027 | -1.461940725 | 0.540694  |
| 806.899 | 735.376 | 0.787793 | -0.4079775   | 0.862641  |
| 397     | 232     | 0.991103 | 0.009056496  | 0.476746  |
| 3813    | 3509    | 0.738294 | -0.480705035 | 0.809293  |
| 1748    | 1690.99 | 0.690447 | -0.526531076 | 0.721209  |
| 2181    | 2095.5  | 0.547172 | -0.51381739  | 0.597832  |
| 5280.45 | 4533.63 | 0.625178 | -0.752420949 | 0.746957  |
| 616.001 | 616.504 | 0.917394 | 0.161577572  | 0.91796   |
| 769     | 868     | 0.833494 | -0.433287756 | 0.754331  |
| 710     | 777     | 0.842621 | -0.412330754 | 0.784858  |
| 548.5   | 594     | 0.688472 | -0.96492149  | 0.640811  |
| 118     | 151.5   | 0.838031 | -0.406909618 | 0.664003  |
| 267.654 | 279.595 | 0.930508 | 0.127218808  | 0.964087  |
| 197     | 238     | 0.994867 | -0.011027022 | 0.855809  |
| 145     | 115     | 0.427439 | -0.493408563 | 0.810583  |
| 6930.51 | 6994.94 | 0.81601  | -0.357076944 | 0.808441  |
| 1553.5  | 1492    | 0.765478 | -0.402849206 | 0.802234  |
| 3831    | 3601    | 0.715335 | -0.495971979 | 0.771218  |
| 1637.5  | 1683    | 0.958241 | 0.071752191  | 0.980985  |
| 6       | 11.5    | 0.815407 | 0.502500341  | 0.779849  |
| 2612    | 2513    | 0.832248 | -0.33344174  | 0.862526  |
| 2676.52 | 2980.61 | 0.950368 | -0.116980965 | 0.878588  |
| 1598    | 1493.5  | 0.777701 | -0.410230514 | 0.834884  |
| 3008.5  | 3175.5  | 0.872194 | -0.318515414 | 0.837082  |
| 2074    | 1825.5  | 0.800587 | -0.336083414 | 0.914401  |
| 1995.5  | 2320    | 0.991318 | -0.019287168 | 0.885617  |
| 1621.5  | 1488    | 0.513614 | -0.574987616 | 0.618376  |
| 0.5     | 0       | 0.034897 | 2            | 0.0162766 |
| 451     | 383.5   | 0.935116 | -0.10617719  | 0.928048  |
| 1136.5  | 762.5   | 0.534784 | -1.008274912 | 0.824651  |
| 27      | 35      | 0.671098 | -1           | 0.509384  |
| 1117    | 737.5   | 0.863161 | -0.21477074  | 0.802423  |
| 1224    | 916     | 0.587862 | -0.471118215 | 0.956992  |
| 3290    | 3101.5  | 0.765323 | -0.391262646 | 0.820182  |
| 5484    | 4501.5  | 0.588964 | -0.561089883 | 0.806226  |
| 8192    | 7486    | 0.368379 | -0.558611971 | 0.495978  |
| 1756.5  | 1821    | 0.981662 | -0.040395602 | 0.9573    |
| 737.499 | 797     | 0.950464 | -0.106543423 | 0.894701  |
| 3966.5  | 3434    | 0.364576 | -0.608245587 | 0.56201   |
| 8423.38 | 7623.8  | 0.5886   | -0.681650458 | 0.682233  |
| 6803    | 6690    | 0.805697 | -0.442080573 | 0.817578  |
| 907     | 867     | 0.829371 | -0.399742837 | 0.859907  |
| 1433.99 | 1540.01 | 0.758824 | -0.45031905  | 0.69688   |
| 834.5   | 757     | 0.785689 | -0.287970712 | 0.89414   |
| 770     | 719.5   | 0.420037 | -0.663902132 | 0.499242  |
| 9989    | 10209.5 | 0.972647 | -0.052729554 | 0.955846  |
| 1148.08 | 825.402 | 0.544951 | -0.620676638 | 0.902259  |
| 264     | 254     | 0.746388 | -0.593183008 | 0.773601  |

|         |         |          |              |          |
|---------|---------|----------|--------------|----------|
| 3       | 2       | 0.544016 | -1           | 0.834708 |
| 340     | 221.5   | 0.246198 | -1.520647687 | 0.551743 |
| 105     | 110     | 0.643756 | -0.959358016 | 0.613035 |
| 34      | 70      | 0.451278 | 1.751740947  | 0.665669 |
| 1063.5  | 1145.5  | 0.977894 | 0.044743492  | 0.968003 |
| 1075    | 1163    | 0.837696 | -0.362761812 | 0.780013 |
| 813.5   | 887     | 0.871754 | -0.302769686 | 0.812048 |
| 375     | 302.499 | 0.516784 | -1.711542997 | 0.633572 |
| 100.5   | 124.5   | 0.92793  | 0.175496796  | 0.938981 |
| 929     | 971.5   | 0.936748 | 0.163526463  | 0.960818 |
| 4670.5  | 5683.5  | 0.968357 | -0.076758887 | 0.837624 |
| 114.708 | 71.6721 | 0.512897 | -1.243799486 | 0.812047 |
| 9.5     | 12.5    | 0.887771 | -0.341036918 | 0.726798 |
| 1583.93 | 1544.47 | 0.880633 | -0.245977373 | 0.89943  |
| 268.5   | 287.5   | 0.968701 | -0.065963262 | 0.919328 |
| 708.5   | 739     | 0.851401 | -0.288714953 | 0.817014 |
| 896.5   | 879.5   | 0.381299 | -2.66860842  | 0.390708 |
| 41.5    | 34.5    | 0.528754 | -1.165586066 | 0.655135 |
| 5.5     | 3       | 1        | 0            | 0.680712 |
| 0       | 0.5     | 0.450185 | #DIV/0!      | 1        |
| 33      | 37      | 0.929774 | -0.16175107  | 0.850603 |
| 559.5   | 562     | 0.712614 | -0.755129261 | 0.709682 |
| 1786.5  | 1477.5  | 0.415923 | -0.672993265 | 0.648535 |
| 6.5     | 18.5    | 0.531688 | 1.509013647  | 1        |
| 56.2852 | 47.6107 | 0.731975 | -0.620746426 | 0.84695  |
| 662     | 552.5   | 0.510864 | -1.537797393 | 0.616827 |
| 221.5   | 155.5   | 0.631205 | -0.646504646 | 0.93161  |
| 6355.53 | 7058.52 | 0.736308 | -0.476133997 | 0.642177 |
| 32      | 29.5    | 0.535014 | -1.245112498 | 0.588278 |
| 121.5   | 89.5    | 0.612262 | -0.725140159 | 0.862912 |
| 915.5   | 1102    | 0.950262 | -0.134512502 | 0.838055 |
| 8559.5  | 9836    | 0.955103 | -0.118690246 | 0.871107 |
| 506.5   | 555     | 0.842435 | -0.397578671 | 0.781917 |
| 1347    | 1265    | 0.750614 | -0.678714674 | 0.789446 |
| 1294    | 754.5   | 0.85734  | 0.236498533  | 0.559886 |
| 148.5   | 122     | 0.613796 | -0.394140158 | 0.895863 |
| 721.499 | 669.5   | 0.739327 | 0.603849669  | 0.705635 |
| 190.5   | 508.5   | 0.990284 | -0.042265727 | 0.493573 |
| 5.5     | 3       | 0.327048 | -2.459431619 | 0.639437 |
| 1145.5  | 1718.5  | 0.597172 | -1.319414543 | 0.358873 |
| 2185    | 2687.92 | 0.939165 | -0.161970879 | 0.809913 |
| 8       | 7       | 0.399373 | -1.678071905 | 0.481309 |
| 1207.5  | 1171    | 0.671063 | -0.416830781 | 0.707691 |
| 717.5   | 565.5   | 0.476537 | -1.588989566 | 0.618246 |
| 332.5   | 287     | 0.405783 | -2.506845811 | 0.479882 |
| 3043    | 3206.5  | 0.731624 | -0.705545348 | 0.697025 |
| 173     | 192.5   | 0.759813 | -0.379345792 | 0.652685 |
| 29      | 37      | 0.879631 | -0.334419039 | 0.726333 |
| 140.5   | 147.5   | 0.725353 | -0.821543365 | 0.69614  |
| 151.5   | 163     | 0.944674 | -0.108747663 | 0.887286 |
| 756     | 736.5   | 0.789791 | -0.502897963 | 0.807624 |
| 200     | 135.5   | 0.691723 | -0.530114024 | 0.984335 |
| 187     | 208     | 0.640679 | -1.189342455 | 0.578736 |
| 77.5    | 49      | 0.801024 | -0.393481356 | 0.89118  |
| 2123.04 | 1679.45 | 0.423699 | -1.765362697 | 0.561813 |
| 166     | 94      | 0.971492 | 0.038588498  | 0.556685 |



|         |         |          |              |          |
|---------|---------|----------|--------------|----------|
| 362     | 404     | 0.994436 | 0.013881709  | 0.938887 |
| 294.001 | 262.501 | 0.891255 | 0.216068741  | 0.820679 |
| 26      | 22      | 0.89522  | 0.182203331  | 0.77904  |
| 547     | 547     | 0.90082  | -0.169101028 | 0.90082  |
| 23      | 23      | 0.684799 | -0.938599455 | 0.684799 |
| 232.5   | 253     | 0.895395 | -0.279886324 | 0.843969 |
| 263     | 307.5   | 0.72004  | -0.735138241 | 0.614143 |
| 0       | 0       | ?        | #DIV/0!      | ?        |
| 2438.52 | 2188.5  | 0.741286 | -0.474534774 | 0.833134 |
| 2392.5  | 2467.5  | 0.919245 | -0.18195983  | 0.898045 |
| 1454    | 1500    | 0.803198 | -0.52853163  | 0.78365  |
| 1123    | 742.5   | 0.151209 | -2.605665206 | 0.337321 |
| 724.001 | 837.505 | 0.878897 | -0.273438095 | 0.772543 |
| 2187    | 2357.5  | 0.786836 | -0.548807736 | 0.73704  |
| 2723.5  | 2983.5  | 0.890901 | -0.215566366 | 0.817508 |
| 279.5   | 228     | 0.998572 | 0.002578544  | 0.852856 |
| 3       | 3       | 0.635978 | -1           | 0.635978 |
| 21.5    | 6       | 0.208158 | -1.178337241 | 0.672759 |
| 8       | 7.5     | 0.879211 | -0.299560282 | 0.919204 |
| 1195    | 1070.5  | 0.888599 | -0.134669211 | 0.981078 |
| 1544.51 | 1530    | 0.797805 | -0.409298115 | 0.80525  |
| 167.5   | 179.5   | 0.686123 | -0.708537186 | 0.634193 |
| 3208.5  | 2906    | 0.592451 | -0.675421419 | 0.685444 |
| 8320.79 | 8467    | 0.798733 | -0.445073605 | 0.7859   |
| 1944.5  | 1844.5  | 0.602499 | -0.529113962 | 0.662154 |
| 1477.5  | 1520.01 | 0.687504 | -0.513555241 | 0.660258 |
| 1968    | 1492    | 0.390811 | -0.66988472  | 0.750149 |
| 6792    | 6041    | 0.567091 | -0.640170262 | 0.687589 |
| 672     | 613.5   | 0.69998  | -0.51887331  | 0.782393 |
| 496     | 491.5   | 0.843746 | -0.310340121 | 0.850933 |
| 822.006 | 819.01  | 0.983377 | -0.038236708 | 0.985693 |
| 1900    | 2103    | 0.853198 | -0.356508327 | 0.783883 |
| 4122.44 | 3231.01 | 0.606947 | -0.652022204 | 0.831374 |
| 595     | 643.502 | 0.841869 | -0.352562809 | 0.784395 |
| 145.5   | 223.5   | 0.921198 | -0.224873411 | 0.647287 |
| 1378.5  | 1473    | 0.817007 | -0.384489433 | 0.765557 |
| 1107.5  | 1157.5  | 0.862783 | -0.317863017 | 0.832117 |
| 2585    | 2341.5  | 0.618948 | -0.583986152 | 0.718361 |
| 771     | 842.5   | 0.901481 | -0.19934346  | 0.831994 |
| 1397    | 1511    | 0.591754 | -0.463697847 | 0.4943   |
| 49.5    | 66      | 0.475831 | -2.541893779 | 0.337084 |
| 9       | 14.5    | 1        | 0            | 0.518461 |
| 7702.5  | 7202.5  | 0.139246 | -2.441469245 | 0.162807 |
| 31.5    | 35      | 0.573231 | -0.932885804 | 0.493604 |
| 6       | 8       | 0.764931 | -0.263034406 | 0.398521 |
| 2164.01 | 2769.54 | 0.773156 | -0.479578608 | 0.574923 |
| 450     | 418     | 0.925709 | -0.137824158 | 0.983657 |
| 1766.94 | 1828.43 | 0.982029 | 0.04273296   | 0.997167 |
| 2032    | 1858.5  | 0.775361 | -0.589940995 | 0.830936 |
| 565.5   | 565     | 0.987253 | 0.026541787  | 0.986646 |
| 3062.55 | 3424.42 | 0.867643 | -0.357740889 | 0.798411 |
| 2070    | 1833.5  | 0.707959 | -0.653471279 | 0.795704 |
| 98      | 90.5    | 0.559573 | -0.376305105 | 0.692152 |
| 76.5    | 72      | 0.329738 | -0.23502003  | 0.530802 |
| 764     | 630     | 0.764147 | -0.216581744 | 0.93775  |
| 16      | 13.5    | 0.849838 | -0.245112498 | 1        |

|         |         |          |              |          |
|---------|---------|----------|--------------|----------|
| 750.5   | 741.004 | 0.810906 | -0.401968762 | 0.820476 |
| 812.5   | 899     | 0.948902 | -0.122225553 | 0.882479 |
| 5778    | 5859.5  | 0.817415 | -0.335695181 | 0.805385 |
| 2302.53 | 2114.45 | 0.703644 | -0.517064594 | 0.780227 |
| 1331.5  | 1320    | 0.746765 | -0.524747533 | 0.753572 |
| 309.5   | 247     | 0.79055  | -0.431445256 | 0.953372 |
| 22      | 25      | 0.604446 | -1.137503524 | 0.522946 |
| 7       | 6       | 0.31594  | -1.807354922 | 0.407544 |
| 229.5   | 228.5   | 0.99649  | -0.006299988 | 1        |
| 9       | 53      | 0.88085  | -0.710493383 | 0.113815 |
| 663     | 633.5   | 0.763973 | -0.37286506  | 0.808522 |
| 874     | 843.5   | 0.46456  | -0.777136033 | 0.499507 |
| 4265.08 | 3974.57 | 0.724845 | -0.488995117 | 0.787232 |
| 3313    | 2824.5  | 0.572814 | -0.545445906 | 0.75935  |
| 1539.5  | 1599.5  | 0.908791 | -0.201844728 | 0.881841 |
| 3285.5  | 3155.5  | 0.643363 | -0.614799041 | 0.680363 |
| 971.494 | 1087.01 | 0.833519 | -0.382974343 | 0.75222  |
| 1209    | 1359    | 0.850843 | -0.376961172 | 0.773202 |
| 1036    | 1118    | 0.92872  | -0.168185347 | 0.877943 |
| 1252    | 1272.5  | 0.924281 | -0.140271727 | 0.91098  |
| 2284    | 2159    | 0.788822 | -0.481389902 | 0.828453 |
| 1080.5  | 1021    | 0.742285 | -0.476641242 | 0.790683 |
| 432     | 370     | 0.845976 | -0.301616868 | 0.962803 |
| 613.5   | 518.5   | 0.828438 | -0.357037688 | 0.949048 |
| 1111.5  | 1281.01 | 0.878682 | -0.282245035 | 0.777844 |
| 2173.5  | 2195    | 0.839729 | -0.333841967 | 0.832228 |
| 1450    | 1484    | 0.848216 | -0.31263035  | 0.830359 |
| 644     | 844     | 0.975194 | -0.067647678 | 0.809869 |
| 1076    | 969.5   | 0.646771 | -0.956418712 | 0.713389 |
| 497     | 624.5   | 0.96745  | 0.081816948  | 0.889947 |
| 1060.5  | 1259.5  | 0.921227 | -0.199560755 | 0.809237 |
| 746     | 666     | 0.693255 | -0.463547036 | 0.8082   |
| 887.5   | 881.5   | 0.995672 | -0.008968464 | 0.999606 |
| 613     | 754.5   | 0.991748 | 0.021027506  | 0.879237 |
| 6638    | 5956    | 0.678243 | -0.856238854 | 0.747646 |
| 5570.5  | 4786.5  | 0.6696   | -0.827396094 | 0.77044  |
| 1192.5  | 1142    | 0.4885   | -0.716941747 | 0.53308  |
| 1294    | 1138.5  | 0.49215  | -1.058011321 | 0.590901 |
| 1256.98 | 1360.48 | 0.410889 | -0.818238639 | 0.339108 |
| 1044.31 | 1027    | 0.683284 | -0.539757052 | 0.698808 |
| 4075.16 | 4266    | 0.777365 | -0.480636379 | 0.742455 |
| 866     | 805     | 0.714271 | -0.545118995 | 0.775186 |
| 718.5   | 673     | 0.958477 | -0.09867539  | 0.99825  |
| 1186.5  | 1224    | 0.862786 | -0.298858957 | 0.840062 |
| 645     | 671     | 0.977151 | 0.049468676  | 0.996445 |
| 2190.5  | 2518    | 0.894589 | -0.255480152 | 0.799934 |
| 1784    | 1929.51 | 0.974604 | -0.059432914 | 0.923444 |
| 3594    | 3425    | 0.642594 | -0.606192367 | 0.687297 |
| 936.5   | 903.998 | 0.710355 | -0.459615722 | 0.745078 |
| 435     | 413.5   | 0.804196 | -0.389832159 | 0.844142 |
| 2       | 2.5     | 0.200976 | #NUM!        | 0.133887 |
| 4.5     | 9       | 0.956965 | -0.169925001 | 0.59912  |
| 5108    | 5367.5  | 0.655042 | -0.660554533 | 0.612994 |
| 9.5     | 8.5     | 0.841602 | 0.395928676  | 0.790485 |
| 74.9999 | 49.5    | 0.681028 | 0.782410489  | 0.552181 |
| 1946.96 | 1655.48 | 0.855813 | -0.333130921 | 0.96019  |

|         |         |          |              |          |
|---------|---------|----------|--------------|----------|
| 7       | 7       | 0.748911 | 0.652076697  | 0.748911 |
| 985.005 | 1668.5  | 0.807969 | -0.585344827 | 0.473647 |
| 39.5    | 26.5    | 0.635118 | -0.911463325 | 0.885604 |
| 10      | 24      | 0.803104 | -1           | 0.376987 |
| 1432.49 | 2186.99 | 0.636557 | 0.920555461  | 0.843653 |
| 7       | 12.5    | 0.810553 | -0.807354922 | 0.5123   |
| 0.5     | 1       | 0.622002 | #NUM!        | 0.353387 |
| 12      | 24      | 0.772957 | 0.584962501  | 0.772957 |
| 250     | 147.5   | 0.9641   | 0.067638717  | 0.672817 |
| 1375    | 1309.01 | 0.868758 | -0.210908926 | 0.914717 |
| 2898.5  | 2634.5  | 0.66436  | -0.496870304 | 0.763366 |
| 170.5   | 154     | 0.848954 | -0.279201609 | 0.931514 |
| 746.5   | 761.5   | 0.596461 | -0.847030924 | 0.580848 |
| 2268    | 2178    | 0.728684 | -0.516482763 | 0.762671 |
| 1316    | 1295    | 0.729436 | -0.587980405 | 0.741603 |
| 4221    | 4353.5  | 0.826466 | -0.394112936 | 0.804358 |
| 101     | 176     | 0.980461 | 0.049147649  | 0.624828 |
| 8221.74 | 11084.7 | 0.873016 | -0.324508102 | 0.667526 |
| 4189.5  | 4515.5  | 0.896219 | -0.263757743 | 0.848656 |
| 30.5    | 13      | 0.18169  | -2.471305719 | 0.639236 |
| 3675    | 3587.5  | 0.728742 | -0.455780434 | 0.751306 |
| 7956.76 | 8665.35 | 0.89803  | -0.240740929 | 0.839966 |
| 157.5   | 137.5   | 0.326102 | -0.889817082 | 0.458706 |
| 1096.51 | 844.5   | 0.888291 | 0.227164327  | 0.743636 |
| 130     | 108.5   | 0.888384 | -0.221467913 | 0.981809 |
| 994.5   | 793     | 0.897182 | -0.172375093 | 0.917708 |
| 1428.5  | 1231.5  | 0.544557 | -0.720397138 | 0.688235 |
| 4382.23 | 4628.88 | 0.737914 | -0.642728658 | 0.699759 |
| 13116.4 | 12466.6 | 0.602506 | -0.691674488 | 0.648512 |
| 22.5    | 28      | 0.887189 | 0.263034406  | 0.974805 |
| 624     | 635     | 0.894782 | -0.245112498 | 0.883038 |
| 1253.5  | 1307.02 | 0.94921  | -0.105644425 | 0.918641 |
| 377     | 295.5   | 0.639135 | -0.813586876 | 0.812326 |
| 34.5    | 41.5    | 0.793973 | -0.493814613 | 0.660873 |
| 168.5   | 129     | 0.725796 | -0.257053429 | 0.877216 |
| 491.618 | 434.827 | 0.954385 | -0.086603447 | 0.955172 |
| 2207.5  | 2175    | 0.923836 | -0.140251017 | 0.935896 |
| 1934.5  | 1845    | 0.983767 | -0.031286318 | 0.981225 |
| 4701.5  | 4671.5  | 0.773903 | -0.407538988 | 0.779526 |
| 238.5   | 524     | 0.879785 | -0.37036845  | 0.377055 |
| 16      | 20      | 0.982184 | -0.04580369  | 0.841306 |
| 1392    | 1399    | 0.844377 | -0.276152745 | 0.839978 |
| 1104    | 1007    | 0.593125 | -0.587905776 | 0.689987 |
| 24.5    | 26      | 0.56753  | 0.861023587  | 0.595342 |
| 3       | 7.5     | 0.897344 | 0.415037499  | 0.657163 |
| 1288.5  | 1325.5  | 0.832914 | -0.359933268 | 0.811786 |
| 11.5    | 9       | 0.710013 | -0.61667136  | 0.88785  |
| 304     | 281     | 0.935012 | -0.142019005 | 0.987437 |
| 43      | 57.5    | 0.895284 | 0.246160587  | 0.914788 |
| 12      | 14      | 0.705361 | -0.415037499 | 0.537935 |
| 179.5   | 129.5   | 0.319233 | -2.044896538 | 0.506022 |
| 940     | 1195.5  | 0.980387 | 0.052001429  | 0.875152 |
| 764.502 | 669.498 | 0.881609 | -0.205522286 | 0.992371 |
| 1385.01 | 1527    | 0.970744 | 0.054177316  | 0.95091  |
| 114.5   | 127.5   | 0.997064 | -0.006313774 | 0.920931 |
| 1105    | 1061    | 0.828744 | -0.399024221 | 0.856439 |

|         |         |           |              |            |
|---------|---------|-----------|--------------|------------|
| 1663    | 1714    | 0.932537  | -0.146903356 | 0.911289   |
| 137.5   | 123     | 0.955742  | 0.096384536  | 0.888672   |
| 1.5     | 3       | 0.622002  | #NUM!        | 0.353387   |
| 53534   | 39217.6 | 0.843454  | -0.306241702 | 0.937114   |
| 597     | 78.5    | 0.536397  | 0.63016192   | 0.169663   |
| 1096    | 1074.49 | 0.872424  | -0.288268777 | 0.886089   |
| 168     | 211.5   | 0.949228  | -0.13492958  | 0.804912   |
| 132     | 167     | 0.769127  | 0.514026594  | 0.910444   |
| 29      | 40.5    | 0.628805  | -0.770518154 | 0.370535   |
| 1       | 0.5     | 0.651448  | 0.584962501  | 0.391002   |
| 92.5    | 74.5    | 0.743523  | -0.283453947 | 0.976029   |
| 6       | 4.5     | 0.473565  | -1.263034406 | 0.672262   |
| 869.5   | 847.5   | 0.823469  | -0.371724795 | 0.842707   |
| 0       | 0.5     | 1         | #DIV/0!      | 0.308068   |
| 93.5    | 86      | 0.537492  | -0.739539538 | 0.617381   |
| 4.5     | 9       | 0.0646968 | -2.169925001 | 0.00729216 |
| 981.158 | 1072.57 | 0.875622  | -0.256792258 | 0.80636    |
| 1900    | 1998    | 0.785812  | -0.413014084 | 0.743652   |
| 1149.84 | 1462.4  | 0.642283  | -0.499167445 | 0.393885   |
| 237     | 202     | 0.831778  | 0.291170816  | 0.726266   |
| 3688.97 | 4524.42 | 0.611633  | -0.641060698 | 0.424758   |
| 987     | 610.5   | 0.960807  | 0.04106825   | 0.503491   |
| 301.5   | 355     | 0.933106  | -0.172619111 | 0.829605   |
| 923.5   | 1176    | 0.954131  | -0.13157933  | 0.812853   |
| 939     | 1150    | 0.934031  | -0.17714499  | 0.808361   |
| 3586.46 | 2964.94 | 0.882719  | -0.266522204 | 0.996772   |
| 2957.24 | 3218.17 | 0.870271  | -0.277476617 | 0.806536   |
| 441     | 438.5   | 0.811028  | -0.47175189  | 0.814759   |
| 36      | 47      | 0.920885  | 0.222392421  | 0.934018   |
| 793     | 783.5   | 0.829964  | -0.416857935 | 0.837901   |
| 2714    | 2469.5  | 0.512734  | -0.63018329  | 0.619447   |
| 125.5   | 122     | 0.83193   | -0.292063454 | 0.857037   |
| 174     | 161     | 0.969971  | 0.060882242  | 0.918117   |
| 2730.46 | 2505.45 | 0.580199  | -0.596745602 | 0.671797   |
| 494.5   | 568.5   | 0.443614  | -1.86236387  | 0.36625    |
| 0.5     | 3       | 0.347278  | 4            | 0.512293   |
| 48.5    | 44      | 0.984347  | -0.030057234 | 0.945276   |
| 0       | 0       | ?         | #DIV/0!      | ?          |
| 1       | 2       | 1         | 0            | 0.651448   |
| 417     | 406.5   | 0.863241  | -0.212050477 | 0.888145   |
| 554     | 596.5   | 0.885091  | -0.269821115 | 0.834403   |
| 3572.39 | 3208.52 | 0.82946   | -0.395151164 | 0.901164   |
| 111     | 128     | 0.716004  | -0.840217229 | 0.62754    |
| 1362    | 1297    | 0.831179  | -0.302986531 | 0.873053   |
| 510     | 660     | 0.96958   | -0.079968305 | 0.80663    |
| 935.5   | 831.5   | 0.912905  | -0.159648463 | 0.994651   |
| 2.5     | 5       | 0.660841  | -2.321928095 | 0.354904   |
| 1       | 1       | 0.710482  | -1           | 0.710482   |
| 8033.5  | 8431.5  | 0.568545  | -0.614123506 | 0.518355   |
| 2700.71 | 2662.96 | 0.784916  | -0.400017935 | 0.796898   |
| 128     | 135.5   | 0.958767  | -0.093109404 | 0.920265   |
| 162     | 243     | 0.76217   | -0.611929548 | 0.476908   |
| 3972.34 | 3857.15 | 0.839142  | -0.375076715 | 0.859161   |
| 403.5   | 406     | 0.842025  | -0.272720571 | 0.836466   |
| 64.4999 | 41.5    | 0.416669  | -1.153244024 | 0.762484   |
| 4163.1  | 3113    | 0.998968  | 0.002008553  | 0.814807   |

|         |         |          |              |          |
|---------|---------|----------|--------------|----------|
| 2530.31 | 2364.18 | 0.84184  | -0.318573724 | 0.893642 |
| 5756    | 6124    | 0.851937 | -0.327043984 | 0.806541 |
| 1843.5  | 2045    | 0.976306 | -0.050164981 | 0.900904 |
| 794.004 | 933.49  | 0.810242 | -0.514066582 | 0.705617 |
| 430.5   | 468.5   | 0.876445 | 0.294524692  | 0.9243   |
| 357.5   | 332.5   | 0.876551 | -0.287042577 | 0.924101 |
| 1579.5  | 1561    | 0.943764 | -0.101690266 | 0.953423 |
| 1162    | 1067.5  | 0.668466 | -0.668666757 | 0.73641  |
| 115.5   | 174     | 0.665248 | -0.632580521 | 0.329874 |
| 38.5    | 41      | 1        | 0            | 0.962412 |
| 4.5     | 12.5    | 0.737792 | -1.169925001 | 0.220612 |
| 39      | 34.5    | 0.926399 | -0.176877762 | 1        |
| 1017.5  | 1096    | 0.82514  | -0.403973291 | 0.772001 |
| 1562    | 1562.99 | 0.756775 | -0.486337804 | 0.756259 |
| 2       | 3       | 0.545627 | #NUM!        | 0.3832   |
| 2811.01 | 2667    | 0.78794  | -0.330813755 | 0.839648 |
| 1318    | 1391.5  | 0.92899  | -0.16384905  | 0.892397 |
| 124     | 119     | 0.785273 | -0.42281485  | 0.818342 |
| 440.5   | 399.5   | 0.60913  | -0.708856746 | 0.694504 |
| 1574.5  | 1271    | 0.666738 | -0.55998211  | 0.860948 |
| 1312.5  | 1329    | 0.766608 | -0.488507864 | 0.756883 |
| 401.5   | 455.5   | 0.935972 | -0.14543044  | 0.847392 |
| 339     | 416.5   | 0.564866 | -1.133678435 | 0.427252 |
| 7468.53 | 12559.9 | 0.755634 | -0.839407536 | 0.449349 |
| 1039.51 | 963.487 | 0.758304 | 0.53338047   | 0.721165 |
| 478.501 | 523.997 | 0.840013 | -0.347789278 | 0.771607 |
| 1.5     | 1       | 0.391002 | -1.584962501 | 0.651448 |
| 924.5   | 930     | 0.850459 | -0.253546538 | 0.845046 |
| 504.5   | 541.998 | 0.868682 | -0.32586907  | 0.82151  |
| 1095.5  | 1067.5  | 0.886878 | -0.187480685 | 0.910427 |
| 1847.5  | 1863    | 0.65216  | -0.501524558 | 0.643266 |
| 2851    | 3020.5  | 0.940556 | -0.137959024 | 0.902049 |
| 3074.5  | 3034.5  | 0.614331 | -0.632303409 | 0.626793 |
| 6452    | 5657.5  | 0.277549 | -0.883216149 | 0.404707 |
| 6469.79 | 6424.05 | 0.731885 | -0.486900648 | 0.738121 |
| 3165.5  | 2553    | 0.543094 | -0.733021108 | 0.748286 |
| 422.5   | 424     | 0.694906 | -0.45602099  | 0.691224 |
| 441.5   | 380.5   | 0.786126 | -0.370527859 | 0.915222 |
| 11077.4 | 11291.8 | 0.793234 | -0.428525253 | 0.778276 |
| 44      | 41.5    | 0.754576 | 0.540570636  | 0.725712 |
| 7.5     | 6.5     | 0.291911 | -1.099535674 | 0.409302 |
| 359.5   | 527.5   | 0.830464 | -0.582957365 | 0.613642 |
| 736     | 451.5   | 0.722566 | 0.627454583  | 0.552641 |
| 2336.98 | 2488.01 | 0.551574 | -1.733048793 | 0.517992 |
| 6218    | 5804.5  | 0.638048 | -0.988675624 | 0.682194 |
| 621     | 664     | 0.61267  | -0.658229633 | 0.551036 |
| 472.5   | 421     | 0.911934 | -0.147768588 | 0.989437 |
| 3568    | 3396.5  | 0.583793 | -0.622546276 | 0.634016 |
| 1486.99 | 1204.48 | 0.755404 | -0.395433953 | 0.947995 |
| 583.393 | 545.851 | 0.539715 | -0.911311248 | 0.593568 |
| 6223.5  | 5792    | 0.744572 | -0.448375988 | 0.808518 |
| 2527.49 | 2490.54 | 0.820574 | -0.310183273 | 0.833811 |
| 3795    | 3515.5  | 0.729554 | -0.693589425 | 0.779395 |
| 538.499 | 587.997 | 0.941668 | -0.139121002 | 0.883826 |
| 247.5   | 193     | 0.956477 | -0.080919995 | 0.868658 |
| 1047.5  | 1323.5  | 0.728809 | -0.833062184 | 0.585365 |

|         |         |          |              |          |
|---------|---------|----------|--------------|----------|
| 3       | 2       | 0.663808 | 0.736965594  | 0.523243 |
| 509.5   | 462.5   | 0.781265 | -0.438349484 | 0.85662  |
| 764.5   | 562.999 | 0.510556 | -0.717285785 | 0.82323  |
| 40.5    | 46      | 0.742468 | -0.506959989 | 0.635603 |
| 3470.5  | 3661.5  | 0.170691 | -0.939552421 | 0.139276 |
| 4290.5  | 4058.5  | 0.692462 | -0.537011541 | 0.742735 |
| 1509    | 1523.5  | 0.519714 | -0.643497712 | 0.50948  |
| 1634    | 1675.5  | 0.585818 | -0.74493386  | 0.563809 |
| 1458.5  | 1345.5  | 0.679841 | -0.545206914 | 0.754096 |
| 3630.5  | 3492.5  | 0.47744  | -0.714490798 | 0.517813 |
| 689.5   | 968.5   | 0.631576 | -1.063084527 | 0.414396 |
| 35.7148 | 69.3893 | 0.703163 | -0.808249946 | 0.272341 |
| 0.5     | 0.5     | 1        | 0            | 1        |
| 157     | 214.001 | 0.728488 | -0.553153762 | 0.474439 |
| 340.5   | 418     | 0.885392 | -0.241585987 | 0.723804 |
| 1176.5  | 1078    | 0.78281  | -0.368978361 | 0.86175  |
| 1476    | 1353.5  | 0.599694 | -0.607868767 | 0.687296 |
| 1146    | 1091    | 0.729053 | -0.488199061 | 0.772215 |
| 896.5   | 1039    | 0.960461 | -0.093055764 | 0.860881 |
| 5606.72 | 6830.96 | 0.927641 | -0.182608016 | 0.797799 |
| 6078    | 5583.5  | 0.865603 | -0.258910182 | 0.931783 |
| 1298    | 1040.5  | 0.859034 | -0.221849753 | 0.94438  |
| 1870    | 2016    | 0.646115 | -0.593862083 | 0.575591 |
| 7889    | 7308    | 0.605756 | -0.625954601 | 0.68036  |
| 3376    | 3083.5  | 0.611287 | -0.488678262 | 0.719284 |
| 156.5   | 160     | 0.70921  | -0.476237656 | 0.687889 |
| 2077.95 | 2274.13 | 0.843731 | -0.361636069 | 0.77948  |
| 2833.53 | 2288.36 | 0.640959 | -0.850669369 | 0.788194 |
| 955     | 990     | 0.966554 | 0.073622863  | 0.989962 |
| 1477    | 1464    | 0.880281 | -0.277563575 | 0.886236 |
| 196.5   | 313     | 0.765745 | -0.890465048 | 0.509816 |
| 9325.12 | 10787.9 | 0.81705  | -0.42098651  | 0.710109 |
| 3490.18 | 4181    | 0.784198 | -0.627942917 | 0.672144 |
| 5       | 8.5     | 0.855216 | -0.514573173 | 0.555132 |
| 356.5   | 322     | 0.700036 | -0.663977075 | 0.774869 |
| 176.793 | 244.297 | 0.738075 | -0.809149277 | 0.538052 |
| 21.5    | 40      | 0.839728 | -0.56828376  | 0.480814 |
| 106     | 99      | 0.836724 | -0.352881023 | 0.885767 |
| 18.3817 | 24.1129 | 0.800209 | -0.415359325 | 0.57869  |
| 2.5     | 5       | 0.577083 | 1.263034406  | 0.869939 |
| 9.5     | 105.5   | 0.926154 | 0.796466606  | 0.290519 |
| 27.5    | 102     | 0.763279 | -0.923378718 | 0.113106 |
| 484.5   | 520     | 0.763767 | -0.502500341 | 0.708672 |
| 2327.5  | 2461.5  | 0.433177 | -0.559313231 | 0.365171 |
| 390.41  | 323.016 | 0.570157 | -0.62013879  | 0.768851 |
| 46.5    | 58.5    | 0.670685 | 0.640750279  | 0.816724 |
| 188.5   | 278     | 0.8822   | -0.296325868 | 0.60659  |
| 19.5    | 23      | 0.821948 | -0.427421224 | 0.704558 |
| 64      | 88.5    | 0.457137 | -1.790546634 | 0.281546 |
| 356     | 212     | 0.966301 | 0.049787378  | 0.606054 |
| 302.5   | 282     | 0.978332 | 0.044610887  | 0.931693 |
| 0       | 0       | ?        | #DIV/0!      | ?        |
| 5341.5  | 4942    | 0.889977 | -0.195522493 | 0.954714 |
| 4458.43 | 4632.59 | 0.943283 | -0.113376773 | 0.914117 |
| 2318    | 2401    | 0.862015 | -0.319906751 | 0.837671 |
| 2826    | 2679.5  | 0.8802   | -0.178565644 | 0.933272 |

|         |         |          |              |          |
|---------|---------|----------|--------------|----------|
| 1765    | 1625.5  | 0.386742 | -0.466909658 | 0.522731 |
| 58      | 100     | 0.94728  | -0.157541277 | 0.605943 |
| 12.5    | 227.5   | 0.953037 | -2.321928095 | 0.245812 |
| 137     | 125.5   | 0.943064 | 0.130786608  | 0.893062 |
| 43      | 53      | 0.737491 | 0.596103058  | 0.853858 |
| 1135.99 | 1034.99 | 0.852549 | -0.317649819 | 0.918372 |
| 323     | 367.499 | 0.891094 | 0.22494248   | 0.979921 |
| 1129    | 1266.5  | 0.758561 | -0.631054766 | 0.681716 |
| 3813.5  | 2924.5  | 0.627667 | -0.654619034 | 0.858344 |
| 42.5    | 44.5    | 0.663095 | 0.800062429  | 0.682634 |
| 1628    | 1551.5  | 0.439488 | -0.521680059 | 0.507019 |
| 648     | 664.5   | 0.930562 | -0.153733287 | 0.913168 |
| 94      | 83.5    | 0.837373 | -0.345135486 | 0.922092 |
| 1493.22 | 1416.2  | 0.655122 | -0.663797925 | 0.699458 |
| 3108.5  | 3110    | 0.677437 | -0.583107242 | 0.67701  |
| 11709.5 | 11386   | 0.819083 | -0.343042482 | 0.84218  |
| 7090    | 6916.5  | 0.79156  | -0.361378742 | 0.813881 |
| 1012    | 938     | 0.759453 | -0.406509228 | 0.828998 |
| 5535.5  | 6226    | 0.871378 | -0.259104312 | 0.776948 |
| 1326    | 1238    | 0.707435 | -0.63308445  | 0.759183 |
| 2767    | 2603.5  | 0.526503 | -1.317762967 | 0.565431 |
| 4174.5  | 2906.5  | 0.392182 | -1.354078618 | 0.651665 |
| 66      | 63.5    | 0.906181 | 0.115477217  | 0.864084 |
| 1610    | 1607.5  | 0.903449 | -0.215092901 | 0.904523 |
| 1095.5  | 1180.5  | 0.897683 | -0.223929656 | 0.843388 |
| 763     | 597     | 0.858344 | -0.203762602 | 0.907235 |
| 567     | 481     | 0.568798 | -0.940190605 | 0.692335 |
| 1057    | 898.5   | 0.445706 | -0.623694895 | 0.650499 |
| 1990    | 1792    | 0.557476 | -0.633809605 | 0.667917 |
| 2       | 6       | 0.780213 | -2           | 0.344733 |
| 2303    | 2198    | 0.644898 | -0.62965519  | 0.686674 |
| 52.1094 | 75.3201 | 0.758344 | -0.588413518 | 0.489695 |
| 58      | 57      | 0.79049  | 0.408805546  | 0.779894 |
| 166.5   | 171.5   | 0.520456 | -0.69287784  | 0.490774 |
| 1131    | 1079    | 0.719042 | -0.47982511  | 0.762363 |
| 525.502 | 565.002 | 0.794298 | -0.437639603 | 0.738203 |
| 463.5   | 863     | 0.937196 | -0.152521955 | 0.471917 |
| 1541.01 | 2165.52 | 0.936    | 0.13869371   | 0.809553 |
| 14.5    | 8.5     | 0.280523 | -1.5360529   | 0.661636 |
| 491.677 | 457.487 | 0.707728 | -0.513374408 | 0.772269 |
| 284     | 304.5   | 0.459949 | -0.878284092 | 0.399648 |
| 893.5   | 1074.5  | 0.833292 | -0.302482039 | 0.66714  |
| 731.002 | 774.995 | 0.885477 | -0.222560844 | 0.838154 |
| 4102.55 | 4715.33 | 0.863484 | -0.374784996 | 0.777305 |
| 166.727 | 313.5   | 0.973762 | 0.086563154  | 0.668782 |
| 287.376 | 646.82  | 0.814156 | -0.814337368 | 0.390893 |
| 226.5   | 538     | 0.814294 | 0.627843872  | 0.722479 |
| 9162.5  | 8927.5  | 0.436663 | -2.122949475 | 0.450499 |
| 477.5   | 455.5   | 0.844387 | -0.270000303 | 0.885859 |
| 81.4999 | 102.5   | 0.890094 | -0.240199836 | 0.714148 |
| 477.5   | 381.5   | 0.449138 | -0.524317492 | 0.786964 |
| 21.5    | 23      | 0.883724 | -0.256339753 | 0.834847 |
| 1448.5  | 1610    | 0.219429 | -0.742120755 | 0.14249  |
| 292.5   | 336     | 0.965163 | -0.083768358 | 0.874086 |
| 405     | 350     | 0.499761 | -0.910234039 | 0.624741 |
| 1360    | 1370.5  | 0.825156 | -0.296951429 | 0.818094 |

|         |         |           |              |          |
|---------|---------|-----------|--------------|----------|
| 118     | 159     | 0.667272  | -0.634715536 | 0.417201 |
| 332.501 | 333     | 0.763068  | -0.569859947 | 0.762028 |
| 1268    | 1092.5  | 0.595162  | -1.290138851 | 0.680776 |
| 6       | 15.5    | 1         | 0            | 0.171387 |
| 1.5     | 5.5     | 1         | 0            | 0.466905 |
| 156.5   | 192     | 0.877451  | -0.359281509 | 0.756024 |
| 551     | 475.5   | 0.364448  | -1.757180354 | 0.453553 |
| 1225    | 1267.5  | 0.868789  | 0.310814926  | 0.88751  |
| 1516    | 1449    | 0.0959802 | -0.878678355 | 0.118863 |
| 484     | 610     | 0.904029  | -0.25352732  | 0.754396 |
| 737.497 | 820     | 0.87986   | -0.283319387 | 0.806375 |
| 82      | 81.5    | 0.699101  | -0.52466199  | 0.704678 |
| 136     | 117     | 0.422824  | -1.644519345 | 0.515237 |
| 199     | 160     | 0.742882  | 0.394042516  | 0.600112 |
| 156.5   | 118     | 0.947239  | -0.115093164 | 0.884001 |
| 8       | 9.5     | 0.789312  | 0.523561956  | 0.878093 |
| 1332    | 1323.5  | 0.863899  | -0.279373143 | 0.868761 |
| 255.5   | 254.5   | 0.774834  | -0.364184284 | 0.778622 |
| 182.5   | 132.5   | 0.487957  | -2.119435231 | 0.646505 |
| 633.5   | 533     | 0.751053  | -0.271027197 | 0.981159 |
| 1706    | 1572.5  | 0.808822  | -0.352697639 | 0.876697 |
| 462     | 460.5   | 0.862961  | -0.326228232 | 0.865126 |
| 0       | 0       | ?         | #DIV/0!      | ?        |
| 1655.48 | 1563.48 | 0.566501  | -0.667188359 | 0.623208 |
| 326     | 147.5   | 0.825716  | 0.309483329  | 0.487418 |
| 4776.55 | 5702.48 | 0.876347  | -0.306557298 | 0.755795 |
| 3031    | 3052    | 0.762996  | -0.471170504 | 0.757387 |
| 982.5   | 1013    | 0.780669  | -0.458514165 | 0.756826 |
| 557.5   | 578.5   | 0.654215  | -0.713437059 | 0.624608 |
| 216     | 230     | 0.826834  | -0.362570079 | 0.778157 |
| 855     | 798.5   | 0.805771  | -0.360402243 | 0.862744 |
| 148     | 145.5   | 0.848441  | -0.296564029 | 0.861992 |
| 289     | 298     | 0.985395  | -0.03026744  | 0.963504 |
| 919.5   | 1193    | 0.833733  | -0.45024307  | 0.662363 |
| 20.5    | 12.5    | 0.461152  | -1.450661409 | 0.767065 |
| 2184    | 2116    | 0.718137  | -0.555053393 | 0.744046 |
| 2157.5  | 2027.5  | 0.143958  | -0.733070176 | 0.193721 |
| 4262.44 | 4272.94 | 0.832617  | -0.420816535 | 0.831025 |
| 703     | 937     | 0.987257  | -0.031116124 | 0.792259 |
| 64      | 61.5    | 0.611381  | -0.85025288  | 0.641649 |
| 315.5   | 323.5   | 0.823229  | 0.338748741  | 0.839787 |
| 1591.5  | 1783.5  | 0.850893  | -0.385280906 | 0.776779 |
| 1418.5  | 1251.5  | 0.404212  | -0.721119053 | 0.546007 |
| 168.5   | 196     | 0.608907  | -0.74555309  | 0.482338 |
| 678.5   | 682     | 0.890735  | -0.212679645 | 0.886665 |
| 0       | 1       | 1         | #DIV/0!      | 0.308068 |
| 1312.5  | 1429.5  | 0.871331  | -0.281954179 | 0.808358 |
| 184     | 200.5   | 0.644496  | -0.879705766 | 0.584067 |
| 1       | 0.5     | 1         | 0            | 0.710482 |
| 4477.06 | 4118.03 | 0.656974  | -0.619714165 | 0.730326 |
| 5       | 7       | 0.527858  | 0.765534746  | 0.780213 |
| 209.5   | 271.5   | 0.58214   | -0.566148191 | 0.324606 |
| 1582    | 1610    | 0.738088  | -0.614211211 | 0.725535 |
| 1114.5  | 1015    | 0.79271   | -0.363957687 | 0.874273 |
| 1983.73 | 2043.26 | 0.943628  | -0.128468711 | 0.923857 |
| 1450.5  | 1535    | 0.760409  | -0.3970808   | 0.706174 |



|         |         |          |              |          |
|---------|---------|----------|--------------|----------|
| 161     | 156     | 0.904677 | -0.126345734 | 0.939846 |
| 705.5   | 720.5   | 0.940611 | -0.127111918 | 0.9257   |
| 378.5   | 409     | 0.859062 | -0.242221395 | 0.787857 |
| 620     | 658     | 0.805316 | -0.253756592 | 0.735069 |
| 7.5     | 16.5    | 0.90703  | -0.321928095 | 0.439735 |
| 4932.5  | 5509    | 0.877412 | -0.261601928 | 0.793444 |
| 30.5    | 46.5    | 0.820625 | 0.544996093  | 0.974036 |
| 1253    | 1413    | 0.83667  | -0.356742659 | 0.745658 |
| 1756    | 1562    | 0.461059 | -0.954709889 | 0.561623 |
| 35.5    | 44      | 0.626217 | -1.105353    | 0.490884 |
| 2182.5  | 1765    | 0.805837 | -0.383958191 | 0.964247 |
| 669.5   | 563.5   | 0.911681 | -0.143766262 | 0.940784 |
| 1742    | 1922.5  | 0.870399 | -0.266184939 | 0.79299  |
| 1343.01 | 1336    | 0.74621  | -0.476891625 | 0.75067  |
| 1139.5  | 1086    | 0.751088 | -0.346025436 | 0.80391  |
| 1274.5  | 1230.5  | 0.74044  | -0.562498909 | 0.766872 |
| 876     | 985     | 0.815965 | -0.39000331  | 0.724372 |
| 77.5    | 336.5   | 0.936122 | -0.430634354 | 0.311517 |
| 22      | 25      | 0.728193 | -0.505235308 | 0.615962 |
| 889.5   | 810.5   | 0.84568  | -0.271329986 | 0.925056 |
| 2045    | 2384.5  | 0.812308 | -0.388244653 | 0.688776 |
| 367     | 338     | 0.719127 | -0.559634321 | 0.785104 |
| 2235.5  | 1927    | 0.445454 | -0.516279768 | 0.667725 |
| 876     | 780.5   | 0.733716 | -0.450606513 | 0.838838 |
| 495     | 482     | 0.741761 | -0.4101881   | 0.767873 |
| 58.5    | 69      | 0.871622 | -0.270451877 | 0.742386 |
| 770.001 | 748.499 | 0.519939 | -0.795926215 | 0.545878 |
| 1666.5  | 1507.5  | 0.520086 | -0.992660222 | 0.598361 |
| 169     | 150     | 0.901018 | -0.220970346 | 0.979299 |
| 2907.5  | 2824.5  | 0.800064 | -0.409836808 | 0.822506 |
| 4439.5  | 4879    | 0.914762 | -0.14105003  | 0.825854 |
| 179     | 154.5   | 0.445407 | -1.217029237 | 0.553179 |
| 376.5   | 377.5   | 0.971115 | -0.058654218 | 0.96919  |
| 184.5   | 76      | 0.753342 | -0.201047519 | 0.312186 |
| 524     | 564     | 0.989399 | -0.023594384 | 0.939599 |
| 290     | 295     | 0.922518 | 0.151007788  | 0.934578 |
| 3755.46 | 3556.58 | 0.786864 | -0.511115495 | 0.823626 |
| 1755.54 | 1533.92 | 0.873557 | -0.256226304 | 0.97147  |
| 798     | 780.5   | 0.72588  | -0.503253824 | 0.745151 |
| 1317.5  | 1371.99 | 0.797516 | -0.412293788 | 0.765256 |
| 1334.5  | 1271.01 | 0.776893 | -0.393398903 | 0.820036 |
| 719.5   | 714     | 0.97188  | 0.064696895  | 0.967198 |
| 741     | 802.5   | 0.87535  | -0.287777026 | 0.819443 |
| 435     | 423.5   | 0.716769 | -0.562747767 | 0.738581 |
| 785     | 911     | 0.7482   | -0.543746309 | 0.631768 |
| 17.5    | 17      | 0.631683 | -1.041820176 | 0.649994 |
| 4.5     | 9       | 0.861263 | -0.584962501 | 0.502018 |
| 1005.5  | 1081.5  | 0.457089 | -1.962470111 | 0.417434 |
| 641.5   | 587     | 0.861764 | -0.231227769 | 0.940685 |
| 120.5   | 97.5    | 0.844196 | -0.283532716 | 0.98902  |
| 3.5     | 4       | 0.3646   | -1.807354922 | 0.290795 |
| 165.5   | 119     | 0.890228 | -0.21081607  | 0.882989 |
| 164     | 163.5   | 0.726033 | -0.772589504 | 0.727923 |
| 1624    | 1606.5  | 0.933623 | -0.129574539 | 0.941925 |
| 6.5     | 4       | 0.506949 | -1.378511623 | 0.796417 |
| 1563.5  | 1633.5  | 0.959945 | -0.091910348 | 0.930979 |

|         |         |           |              |           |
|---------|---------|-----------|--------------|-----------|
| 493     | 384     | 0.474786  | -1.707039097 | 0.617465  |
| 0.5     | 1.5     | 0.724378  | #NUM!        | 0.329316  |
| 1175.5  | 887     | 0.934698  | -0.099053599 | 0.825682  |
| 345.285 | 311.412 | 0.0716832 | -2.080345918 | 0.0973578 |
| 777     | 824     | 0.817087  | -0.26973424  | 0.75502   |
| 1518    | 1496.5  | 0.588201  | -0.489805268 | 0.605757  |
| 1865.5  | 1858    | 0.844167  | -0.324250029 | 0.847219  |
| 4.5     | 7       | 0.555119  | #NUM!        | 0.378691  |
| 0.5     | 2       | 0.139326  | 2.321928095  | 0.651448  |
| 2042    | 2353.5  | 0.860247  | -0.297062484 | 0.750302  |
| 461     | 397     | 0.545583  | -0.950777484 | 0.661512  |
| 759     | 858.5   | 0.698053  | -0.902620158 | 0.622084  |
| 1190.5  | 1549    | 0.865462  | -0.327087628 | 0.678006  |
| 19.5    | 25.5    | 0.612533  | -0.963474124 | 0.425772  |
| 4666.56 | 5017.46 | 0.875384  | -0.253151843 | 0.818496  |
| 1       | 0       | 0.622002  | -1           | 0.622002  |
| 430     | 418.5   | 0.790802  | -0.330340335 | 0.817332  |
| 175     | 157.5   | 0.988003  | 0.024522319  | 0.918242  |
| 5.5     | 105.5   | 0.948576  | -2.459431619 | 0.202366  |
| 34.5    | 30.5    | 0.735423  | -0.275634443 | 0.909448  |
| 10      | 5       | 0.83713   | 0.378511623  | 0.592331  |
| 3296.5  | 2747.5  | 0.390394  | -2.192863917 | 0.488225  |
| 1902.5  | 915     | 0.634157  | -0.614070157 | 0.809914  |
| 208.5   | 135.5   | 0.192029  | -2.311586151 | 0.415667  |
| 1032    | 1066.5  | 0.925463  | 0.174886984  | 0.944741  |
| 604.5   | 525.5   | 0.682593  | -0.877654756 | 0.768808  |
| 972.5   | 1137.5  | 0.944548  | -0.136020795 | 0.841446  |
| 1603.5  | 2086.5  | 0.990092  | 0.024974634  | 0.840676  |
| 26.5    | 14      | 0.929121  | -0.142957954 | 0.724925  |
| 2945.5  | 2932.5  | 0.560714  | -0.574834858 | 0.565669  |
| 1526    | 1404    | 0.87249   | -0.241265962 | 0.938369  |
| 392.5   | 397     | 0.849683  | -0.303665888 | 0.840788  |
| 23339.1 | 32078.8 | 0.844318  | -0.454255451 | 0.644889  |
| 2342    | 2851.5  | 0.934062  | -0.15700829  | 0.798065  |
| 48      | 62.5    | 0.884836  | -0.31817596  | 0.717287  |
| 206.5   | 185.5   | 0.811663  | -0.399979124 | 0.889688  |
| 274     | 361     | 0.751193  | -0.528176475 | 0.530356  |
| 173.5   | 142.5   | 0.833009  | -0.278920516 | 0.99723   |
| 1621.5  | 1835.5  | 0.776113  | -0.377133203 | 0.658026  |
| 48.5    | 49      | 0.51504   | -1.173648087 | 0.507892  |
| 259     | 189     | 0.951228  | 0.102137975  | 0.776099  |
| 338.499 | 285.999 | 0.700715  | 0.487253475  | 0.598786  |
| 4       | 2.5     | 0.62797   | 0.906890596  | 0.498159  |
| 1       | 1       | 0.710482  | -1           | 0.710482  |
| 1.5     | 4       | 0.503591  | 1.584962501  | 0.907467  |
| 1854.5  | 1639.5  | 0.922077  | -0.152478581 | 0.987821  |
| 483.002 | 516.999 | 0.915891  | -0.169374391 | 0.863112  |
| 88.9999 | 85      | 0.99159   | -0.016300191 | 0.974773  |
| 2279.56 | 2446.98 | 0.702231  | -0.79922161  | 0.655555  |
| 11.5    | 15      | 0.948879  | 0.120294234  | 0.872914  |
| 0       | 0.5     | 1         | #DIV/0!      | 0.308068  |
| 24.5    | 23.5    | 0.854781  | -0.366782331 | 0.880841  |
| 839.5   | 729.5   | 0.932485  | -0.116265086 | 0.953213  |
| 569.501 | 891.495 | 0.858762  | -0.323828659 | 0.513718  |
| 12.5    | 11      | 0.796782  | -0.473931188 | 0.882519  |
| 13.5    | 10.5    | 0.368662  | -1.754887502 | 0.522364  |

|         |         |          |              |          |
|---------|---------|----------|--------------|----------|
| 6.5     | 5.5     | 0.502193 | -1.700439718 | 0.595734 |
| 3       | 4       | 0.58535  | -2.584962501 | 0.456318 |
| 1.5     | 3       | 0.588437 | #NUM!        | 0.313562 |
| 4004.49 | 4258.46 | 0.730515 | -0.707953755 | 0.689741 |
| 1299    | 1488.5  | 0.716817 | -0.761039969 | 0.626376 |
| 129.5   | 135     | 0.925252 | -0.152622143 | 0.893879 |
| 0       | 0.5     | 0.329316 | #DIV/0!      | 0.495025 |
| 5151    | 5421    | 0.879209 | -0.306536044 | 0.846705 |
| 2323.44 | 2398.5  | 0.883872 | -0.273256279 | 0.862441 |
| 72      | 106.5   | 0.572975 | 0.77844223   | 0.848398 |
| 13.5    | 16      | 0.893828 | -0.295455884 | 0.790559 |
| 229     | 149     | 0.796345 | -0.191745362 | 0.645573 |
| 2155    | 1231.5  | 0.781406 | 0.174158722  | 0.279472 |
| 62.5    | 52      | 0.851068 | 0.121678557  | 0.59383  |
| 42.5    | 31.5    | 0.567522 | -1.051838932 | 0.769854 |
| 24.5    | 6       | 0.219659 | 1.385290156  | 0.107809 |
| 64.5    | 129     | 0.762202 | -0.966833136 | 0.387005 |
| 2696.12 | 3101.59 | 0.894342 | -0.275718371 | 0.805207 |
| 6636.5  | 6723    | 0.745244 | -0.510557091 | 0.734741 |
| 52.5    | 80      | 0.761537 | -0.714245518 | 0.493274 |
| 3133.99 | 3023.06 | 0.8464   | -0.323529809 | 0.873067 |
| 4433    | 5003    | 0.92552  | -0.194459409 | 0.850622 |
| 2561    | 2881.5  | 0.938767 | -0.169572961 | 0.870369 |
| 4987.02 | 5775.61 | 0.842941 | -0.45027362  | 0.754107 |
| 4384.08 | 3790.13 | 0.89172  | -0.248704136 | 0.984288 |
| 1375    | 1575    | 0.987103 | 0.031138512  | 0.927073 |
| 72.5906 | 59.6543 | 0.675286 | -0.850589665 | 0.799498 |
| 622.5   | 663.5   | 0.881412 | -0.259562214 | 0.834893 |
| 3354    | 3110    | 0.834635 | -0.318812934 | 0.894596 |
| 957.5   | 957     | 0.772182 | -0.42840873  | 0.772625 |
| 1675.5  | 1769.5  | 0.698354 | -0.597936464 | 0.653155 |
| 1308.99 | 1109    | 0.752254 | -0.406599962 | 0.904268 |
| 300.5   | 369.5   | 0.813828 | -0.398331167 | 0.650504 |
| 1392.5  | 1404    | 0.777324 | -0.565410699 | 0.771894 |
| 2986    | 2767    | 0.65413  | -0.490411906 | 0.736255 |
| 6462.5  | 5799    | 0.175163 | -0.905496014 | 0.261764 |
| 858.5   | 952     | 0.626696 | -0.618969851 | 0.52967  |
| 2164    | 1981.5  | 0.312203 | -0.902688306 | 0.394165 |
| 3091.5  | 3041.5  | 0.209836 | -0.75685759  | 0.223972 |
| 2386.5  | 1707    | 0.196545 | -1.101739548 | 0.496081 |
| 2642.5  | 3074    | 0.725744 | -0.705464451 | 0.621891 |
| 7519.5  | 7423.5  | 0.823081 | -0.342361363 | 0.833521 |
| 1253.5  | 1195    | 0.705401 | -0.531026333 | 0.747487 |
| 12957.8 | 14961.9 | 0.81679  | -0.444307004 | 0.715785 |
| 7963.56 | 9169.94 | 0.899557 | -0.244447853 | 0.804272 |
| 1256.5  | 1340    | 0.863125 | -0.32149759  | 0.818675 |
| 1629    | 1640.5  | 0.845517 | -0.329386653 | 0.840284 |
| 319.5   | 406.5   | 0.947817 | -0.124915267 | 0.780732 |
| 208.5   | 210.5   | 0.881852 | -0.2403792   | 0.874561 |
| 2351.5  | 2334    | 0.766434 | -0.461695754 | 0.772506 |
| 555     | 560.5   | 0.879705 | -0.252157817 | 0.872368 |
| 99.5    | 110     | 0.996859 | 0.007231569  | 0.937286 |
| 739.497 | 759.497 | 0.822928 | -0.311227123 | 0.799023 |
| 425     | 425.5   | 0.93052  | -0.133266531 | 0.929598 |
| 567.5   | 478     | 0.991478 | 0.016430344  | 0.874948 |
| 751     | 662.502 | 0.839354 | -0.325048341 | 0.932601 |

|         |         |          |              |          |
|---------|---------|----------|--------------|----------|
| 1201    | 1261.5  | 0.735174 | -0.599753311 | 0.698732 |
| 553.496 | 487.497 | 0.926317 | -0.158221136 | 0.989074 |
| 4755.5  | 4924.94 | 0.776343 | -0.532606142 | 0.75178  |
| 7341.5  | 7199.5  | 0.867551 | -0.273665492 | 0.882198 |
| 4908    | 6677    | 0.565594 | -1.629742478 | 0.396631 |
| 87.5    | 98.5    | 0.679898 | -0.406816992 | 0.540837 |
| 4711.5  | 4902.5  | 0.933361 | -0.140599536 | 0.904453 |
| 440     | 305.5   | 0.624735 | -1.003282584 | 0.845784 |
| 1159.47 | 1255.38 | 0.381348 | -0.851872288 | 0.311764 |
| 9       | 12      | 0.883689 | 0.289506617  | 0.9416   |
| 126     | 136     | 0.71439  | 0.584962501  | 0.757312 |
| 143     | 115.5   | 0.858751 | 0.253756592  | 0.724247 |
| 125     | 135     | 0.788336 | -0.457989644 | 0.729449 |
| 1159    | 1289.5  | 0.962283 | 0.09104627   | 0.972516 |
| 315.5   | 331     | 0.874225 | -0.312811508 | 0.843105 |
| 2637    | 2413.48 | 0.660961 | -0.494710232 | 0.754021 |
| 6525    | 6007    | 0.771757 | -0.38332864  | 0.847548 |
| 320.544 | 269.276 | 0.832122 | -0.305471849 | 0.97252  |
| 860.5   | 466.5   | 0.990777 | 0.014180985  | 0.59425  |
| 98.4999 | 123.5   | 0.955522 | 0.085308777  | 0.860178 |
| 17386   | 14284   | 0.743934 | -0.326322362 | 0.968779 |
| 411.5   | 357     | 0.690306 | -0.517330475 | 0.821485 |
| 5265.51 | 4839.98 | 0.6814   | -0.52769295  | 0.760784 |
| 1511.49 | 1348.01 | 0.439741 | -0.557521205 | 0.597473 |
| 16568.1 | 14379   | 0.643731 | -0.486323996 | 0.800611 |
| 1106.5  | 1015    | 0.338102 | -0.935614587 | 0.416545 |
| 0.5     | 1       | 0.308068 | 2            | 0.474021 |
| 3818.14 | 3570.96 | 0.587388 | -0.542427928 | 0.663616 |
| 2465.5  | 2663.5  | 0.830434 | -0.391915186 | 0.775286 |
| 13.5    | 13      | 0.816359 | -0.432959407 | 0.842009 |
| 0       | 0       | ?        | #DIV/0!      | ?        |
| 1961    | 1507    | 0.154398 | -2.096595897 | 0.277822 |
| 7670    | 7786.5  | 0.793998 | -0.455604247 | 0.782882 |
| 2431.5  | 2131    | 0.941573 | -0.111601027 | 0.961395 |
| 4758.5  | 4306.5  | 0.578156 | -0.467678979 | 0.710354 |
| 504.5   | 562.5   | 0.562295 | -0.737919127 | 0.464494 |
| 794     | 746     | 0.837013 | -0.332642637 | 0.884225 |
| 5       | 11      | 0.729252 | -1.736965594 | 0.378209 |
| 1617.5  | 1580    | 0.66509  | -0.497158668 | 0.689502 |
| 910     | 829.5   | 0.782987 | -0.341882701 | 0.872318 |
| 41767.6 | 32483.7 | 0.465418 | -0.614577623 | 0.784023 |
| 225     | 300.5   | 0.935526 | -0.155569708 | 0.731759 |
| 3694    | 4034.5  | 0.779815 | -0.512788901 | 0.715997 |
| 8342.09 | 8244.04 | 0.606626 | -0.558215778 | 0.619256 |
| 6471    | 6266    | 0.691066 | -0.467788449 | 0.724035 |
| 1555    | 1625    | 0.85393  | -0.303490847 | 0.820108 |
| 236     | 263     | 0.913536 | -0.213758065 | 0.842839 |
| 156.5   | 161     | 0.872241 | -0.307025272 | 0.853395 |
| 986     | 1006    | 0.918662 | -0.183892604 | 0.904971 |
| 153     | 203.5   | 0.975573 | -0.067563284 | 0.802552 |
| 1019.5  | 871.5   | 0.718074 | -0.440976963 | 0.870015 |
| 479     | 439     | 0.980562 | -0.036603106 | 0.954676 |
| 6.5     | 8       | 0.543813 | 0.691877705  | 0.698393 |
| 944.5   | 1143.5  | 0.516904 | -0.940892481 | 0.36902  |
| 365.499 | 382.999 | 0.930344 | -0.160576823 | 0.898907 |
| 274.5   | 314.5   | 0.963427 | 0.086689734  | 0.950542 |

|         |         |          |              |          |
|---------|---------|----------|--------------|----------|
| 2783.97 | 2919    | 0.760789 | -0.473555819 | 0.7218   |
| 1233    | 1181    | 0.843989 | -0.310119369 | 0.877526 |
| 1146    | 1061    | 0.726381 | -0.591586891 | 0.784072 |
| 994.5   | 1105.5  | 0.704719 | -0.622437206 | 0.620729 |
| 1945.5  | 1845.5  | 0.896087 | -0.249527378 | 0.929546 |
| 624     | 575.5   | 0.691282 | -0.817796669 | 0.743393 |
| 1928.01 | 2075.48 | 0.921219 | -0.174804559 | 0.869011 |
| 1802    | 2376    | 0.961119 | 0.09675756   | 0.861363 |
| 44      | 60      | 0.994463 | -0.016488123 | 0.819736 |
| 4806    | 5121.5  | 0.720487 | -0.574643071 | 0.66933  |
| 1778.99 | 1823.99 | 0.809884 | -0.428347137 | 0.791806 |
| 1715.5  | 1623    | 0.801914 | -0.353707038 | 0.849977 |
| 1846    | 2158.5  | 0.341634 | -0.540142158 | 0.18053  |
| 3191    | 3147    | 0.815545 | -0.359602101 | 0.826779 |
| 2350.49 | 2220.52 | 0.463368 | -0.603031456 | 0.532885 |
| 728     | 876     | 0.236567 | -0.800435508 | 0.117369 |
| 1055    | 1152.5  | 0.898235 | -0.234867511 | 0.836752 |
| 1800.47 | 1999.04 | 0.835242 | -0.382670688 | 0.760378 |
| 1.5     | 2       | 0.834708 | -0.584962501 | 0.680109 |
| 692.499 | 660.5   | 0.857087 | -0.288460708 | 0.893125 |
| 5       | 4       | 0.308068 | -3.321928095 | 0.411079 |
| 18.5    | 35      | 0.780508 | -0.351472371 | 0.216308 |
| 2.5     | 4       | 0.877103 | -0.321928095 | 0.549192 |
| 1166    | 942.5   | 0.970255 | 0.06176138   | 0.84151  |
| 28      | 15.5    | 0.922417 | -0.13492958  | 0.700651 |
| 188.5   | 233.5   | 0.932356 | -0.19647694  | 0.808134 |
| 11.5    | 29      | 0.56161  | -1.523561956 | 0.118552 |
| 861     | 842.5   | 0.761476 | -0.337299581 | 0.785068 |
| 82      | 95.5    | 0.816083 | 0.430350555  | 0.90221  |
| 5351.55 | 5578.37 | 0.824101 | -0.390436781 | 0.793682 |
| 604     | 632.5   | 0.928912 | -0.156255698 | 0.896478 |
| 140     | 146     | 0.898702 | 0.16073583   | 0.935375 |
| 1166    | 1134    | 0.576665 | -1.198667386 | 0.594341 |
| 569.5   | 491.5   | 0.624426 | -0.683910214 | 0.751863 |
| 771     | 846.5   | 0.896562 | -0.239647868 | 0.831629 |
| 338     | 293.5   | 0.996598 | 0.006388328  | 0.896133 |
| 9       | 5.5     | 0.602379 | -0.847996907 | 0.946732 |
| 841.5   | 743     | 0.841557 | -0.246160587 | 0.959394 |
| 7       | 15      | 0.670897 | -1.222392421 | 0.253943 |
| 7297.5  | 6566    | 0.525676 | -0.891221997 | 0.614403 |
| 743     | 787     | 0.903212 | -0.216417852 | 0.862611 |
| 1820.5  | 1872    | 0.853719 | -0.330273138 | 0.833928 |
| 478.633 | 478.398 | 0.372313 | -1.163677304 | 0.372679 |
| 636.5   | 720     | 0.888701 | -0.245238426 | 0.797748 |
| 2340    | 2364    | 0.817127 | -0.387758411 | 0.809402 |
| 22.0012 | 16      | 0.890129 | 0.213378884  | 0.711135 |
| 553     | 496.5   | 0.777929 | -0.373043411 | 0.875735 |
| 0       | 1       | 1        | #DIV/0!      | 0.308068 |
| 1044    | 1016.5  | 0.82305  | -0.284754602 | 0.848538 |
| 63      | 57      | 0.806814 | -0.422691072 | 0.87811  |
| 4.01384 | 3.00786 | 0.163306 | -2.004983109 | 0.308071 |
| 1183    | 1301    | 0.973967 | -0.055315782 | 0.90526  |
| 369.5   | 319.5   | 0.7748   | -0.384772311 | 0.903295 |
| 307.986 | 269.492 | 0.913931 | -0.155585292 | 0.980788 |
| 217     | 255     | 0.859688 | -0.184122404 | 0.668055 |
| 167     | 245     | 0.819475 | -0.57634937  | 0.589637 |

|         |         |          |              |          |
|---------|---------|----------|--------------|----------|
| 688.5   | 500.5   | 0.53946  | -1.493622189 | 0.717145 |
| 610.5   | 497.5   | 0.898942 | -0.16771126  | 0.930462 |
| 855.504 | 826.006 | 0.815494 | -0.507015906 | 0.836458 |
| 2938.5  | 2666.5  | 0.741652 | -0.547525562 | 0.814797 |
| 506     | 533     | 0.52094  | -1.218121984 | 0.485838 |
| 7544.32 | 7978.67 | 0.783478 | -0.613896871 | 0.749254 |
| 2597.5  | 2502    | 0.797141 | -0.392716684 | 0.827601 |
| 989     | 1095.5  | 0.966017 | -0.080232868 | 0.898749 |
| 7095    | 8299.5  | 0.916477 | -0.214214278 | 0.815809 |
| 417.5   | 435     | 0.699921 | -0.578927915 | 0.665237 |
| 1174.5  | 1081.5  | 0.624465 | -0.527174749 | 0.71393  |
| 1428    | 1184    | 0.713858 | -0.392980578 | 0.916255 |
| 259.84  | 265.366 | 0.854778 | -0.299949846 | 0.83866  |
| 689     | 598     | 0.705579 | -0.487312566 | 0.837032 |
| 947.5   | 1048.5  | 0.964642 | -0.083851112 | 0.898275 |
| 1265.5  | 1160.5  | 0.845906 | -0.288683504 | 0.915823 |
| 983.5   | 959     | 0.665027 | -0.593053088 | 0.687698 |
| 639.5   | 687.5   | 0.811026 | -0.394504554 | 0.75436  |
| 867.505 | 806.997 | 0.69183  | -0.509243485 | 0.760156 |
| 749.5   | 788     | 0.683996 | -0.563942731 | 0.638947 |
| 614.676 | 580.481 | 0.667083 | -0.603208607 | 0.717355 |
| 819.5   | 980     | 0.895673 | -0.270270398 | 0.779612 |
| 134     | 108.5   | 0.745549 | -0.53470773  | 0.899585 |
| 1279    | 1203.5  | 0.900775 | -0.203806871 | 0.945081 |
| 124.5   | 127     | 0.981315 | 0.039998068  | 0.994661 |
| 23      | 27.5    | 0.661978 | -0.823122238 | 0.533921 |
| 3893    | 3946.5  | 0.89538  | -0.237105375 | 0.88599  |
| 130.5   | 84.5    | 0.960463 | -0.091268058 | 0.814757 |
| 20      | 25.5    | 0.961031 | 0.10433666   | 0.896478 |
| 177     | 99.5    | 0.578306 | -1.066726114 | 0.926082 |
| 15.5    | 22      | 0.793549 | -0.784271309 | 0.607474 |
| 286.5   | 310.5   | 0.707681 | -0.813663175 | 0.656056 |
| 908.501 | 704.999 | 0.635863 | 0.922943975  | 0.558452 |
| 7.5     | 7       | 0.281682 | -2.321928095 | 0.316196 |
| 96      | 33.5    | 0.972072 | 0.05166212   | 0.525347 |
| 2374.49 | 2234.57 | 0.91303  | -0.21132536  | 0.950537 |
| 58.5    | 40      | 0.231547 | -2.700439718 | 0.41793  |
| 511.499 | 640.003 | 0.964417 | 0.094164247  | 0.903362 |
| 44.5    | 45      | 0.913425 | 0.210767096  | 0.919575 |
| 180     | 250     | 0.917015 | -0.239187664 | 0.71502  |
| 52      | 64.5    | 0.856752 | 0.397592365  | 0.964994 |
| 497     | 410     | 0.745521 | 0.43950274   | 0.632388 |
| 0       | 0       | ?        | #DIV/0!      | ?        |
| 9204.09 | 11527.1 | 0.927453 | -0.202493315 | 0.791039 |
| 395.5   | 384.5   | 0.829492 | -0.303353338 | 0.854023 |
| 493.5   | 499.5   | 0.671065 | -0.569695744 | 0.659969 |
| 1591.5  | 1658.5  | 0.722647 | -0.492788228 | 0.68542  |
| 1550    | 1626    | 0.805979 | -0.522573351 | 0.775885 |
| 4331.5  | 4533.44 | 0.877092 | -0.313087236 | 0.848224 |
| 2707.96 | 2649.52 | 0.738168 | -0.588408247 | 0.754167 |
| 369     | 334.5   | 0.892008 | -0.256013978 | 0.953922 |
| 190.5   | 139     | 0.397497 | -1.279026439 | 0.631751 |
| 403     | 412     | 0.527749 | -0.677356105 | 0.505313 |
| 928     | 829     | 0.871049 | -0.229535455 | 0.964347 |
| 1138.51 | 1149.51 | 0.842696 | -0.311368473 | 0.835037 |
| 3150    | 2807.5  | 0.731857 | -0.42207729  | 0.843634 |

|         |         |          |              |          |
|---------|---------|----------|--------------|----------|
| 2.5     | 4.5     | 0.539745 | 1.584962501  | 0.706667 |
| 1325    | 1277.5  | 0.774648 | -0.326016983 | 0.813318 |
| 0.5     | 1       | 0.622002 | #NUM!        | 0.353387 |
| 2       | 5.5     | 0.703704 | #NUM!        | 0.333145 |
| 281     | 389     | 0.986904 | 0.035498681  | 0.813757 |
| 226.5   | 533.5   | 0.826557 | -0.892629902 | 0.416199 |
| 314.5   | 487.5   | 0.971973 | -0.082597086 | 0.705923 |
| 4379.97 | 4546.97 | 0.766136 | -0.404346951 | 0.731693 |
| 203.5   | 153     | 0.60148  | -0.68589141  | 0.854083 |
| 1122.5  | 1253    | 0.891931 | -0.213633512 | 0.802919 |
| 39      | 38      | 0.942616 | -0.135655099 | 0.958984 |
| 39.5    | 43.5    | 0.903706 | -0.113956189 | 0.779042 |
| 6       | 6.5     | 1        | 0            | 0.936602 |
| 333     | 303     | 0.717594 | -0.546488353 | 0.794935 |
| 2665    | 2732    | 0.914733 | 0.133561058  | 0.936747 |
| 1142.01 | 1161.5  | 0.787407 | -0.401637415 | 0.77309  |
| 603     | 530     | 0.686604 | -0.469485283 | 0.818065 |
| 431.5   | 335     | 0.770611 | -0.486430208 | 0.94878  |
| 127.5   | 95      | 0.75169  | -0.526747887 | 0.957551 |
| 11925   | 10256   | 0.851235 | -0.169856951 | 0.960973 |
| 8       | 15      | 0.677728 | 0.95419631   | 0.977532 |
| 515     | 603     | 0.887191 | -0.283914769 | 0.782494 |
| 939.5   | 1229.5  | 0.813451 | -0.547074424 | 0.645615 |
| 7061    | 7988.5  | 0.831235 | -0.241658351 | 0.696089 |
| 3272.5  | 2570    | 0.430368 | -1.249912722 | 0.607202 |
| 0       | 0       | ?        | #DIV/0!      | ?        |
| 547.5   | 628     | 0.939969 | 0.136904522  | 0.971328 |
| 119.5   | 112     | 0.841704 | -0.346277956 | 0.887678 |
| 1634.5  | 1353.5  | 0.798757 | -0.217252783 | 0.953013 |
| 119     | 183.5   | 0.823236 | -0.340228912 | 0.447311 |
| 2673.5  | 2721    | 0.710522 | -0.532374633 | 0.695112 |
| 1322    | 1220.49 | 0.611497 | -0.61863871  | 0.68927  |
| 2114.5  | 1887.5  | 0.653301 | -0.548249008 | 0.764288 |
| 11.5    | 9       | 0.735054 | -0.523561956 | 0.9222   |
| 0       | 0       | 0.308068 | #DIV/0!      | 0.308068 |
| 2066.38 | 2119.1  | 0.893545 | -0.149067541 | 0.866244 |
| 1501.5  | 1313    | 0.535152 | -0.62663432  | 0.683503 |
| 366     | 352     | 0.860298 | -0.320942984 | 0.886774 |
| 1291.5  | 1237.5  | 0.718566 | -0.859098497 | 0.743287 |
| 778.5   | 886.5   | 0.683495 | -1.084916976 | 0.610005 |
| 1151    | 1092    | 0.783897 | -0.387312405 | 0.829665 |
| 657     | 624.5   | 0.976988 | 0.043262463  | 0.939671 |
| 396     | 436     | 0.904486 | -0.219965684 | 0.837442 |
| 1370.5  | 1331.5  | 0.96313  | -0.085654685 | 0.981324 |
| 1167.5  | 1138    | 0.822786 | -0.331225839 | 0.844147 |
| 63.5    | 62      | 0.949374 | -0.093866923 | 0.968338 |
| 1671.52 | 1804.13 | 0.865915 | -0.318335587 | 0.813517 |
| 485.5   | 358     | 0.910222 | 0.149475049  | 0.704513 |
| 948.12  | 807.377 | 0.585894 | -0.642581906 | 0.744636 |
| 1235    | 1448    | 0.949133 | 0.117151228  | 0.947164 |
| 1029    | 967.5   | 0.949274 | -0.088909416 | 1        |
| 1468.5  | 1493.5  | 0.722157 | -0.532153026 | 0.707884 |
| 5671.5  | 6002    | 0.787211 | -0.621869992 | 0.75346  |
| 20.5    | 24.5    | 0.944775 | -0.109624491 | 0.800605 |
| 1246    | 1425    | 0.934068 | -0.167394401 | 0.848778 |
| 1484    | 1579    | 0.858592 | -0.274355843 | 0.807706 |

|         |         |           |              |           |
|---------|---------|-----------|--------------|-----------|
| 247.5   | 264     | 0.736258  | -0.392864002 | 0.668558  |
| 455.5   | 368.5   | 0.700849  | -0.478160418 | 0.900013  |
| 17      | 37      | 0.988726  | 0.041820176  | 0.591892  |
| 1263    | 1032    | 0.532355  | -0.718615984 | 0.732197  |
| 31.5    | 20.5    | 0.946784  | 0.067114196  | 0.588475  |
| 1733    | 2250.5  | 0.910553  | -0.235984112 | 0.740218  |
| 749.056 | 864.601 | 0.966268  | -0.071981096 | 0.860425  |
| 252     | 228     | 0.924469  | 0.139064038  | 0.854326  |
| 122     | 151     | 0.805515  | 0.44864103   | 0.93131   |
| 558     | 549     | 0.83476   | -0.387719381 | 0.84584   |
| 1345    | 1420.5  | 0.602921  | -0.570819626 | 0.545823  |
| 11.5    | 15      | 0.526589  | 1.231325546  | 0.618785  |
| 484.5   | 491.5   | 0.82915   | -0.422501018 | 0.819681  |
| 746     | 726     | 0.736236  | -0.591747105 | 0.756174  |
| 1229.5  | 1675    | 0.893624  | -0.252628764 | 0.668286  |
| 663.998 | 399.501 | 0.340469  | -1.438397147 | 0.704807  |
| 1092.49 | 1201.52 | 0.871399  | -0.282840757 | 0.801245  |
| 1171    | 1095.5  | 0.840214  | -0.351961013 | 0.8872    |
| 550.5   | 500     | 0.630911  | -0.506546253 | 0.737334  |
| 964.5   | 1107    | 0.871091  | -0.297088584 | 0.772196  |
| 3513.5  | 3991.5  | 0.759011  | -0.65780734  | 0.676283  |
| 257     | 281     | 0.71641   | -0.845753212 | 0.661934  |
| 272.5   | 315.5   | 0.951407  | -0.118568866 | 0.855341  |
| 4292    | 4802    | 0.909404  | -0.167699818 | 0.813403  |
| 3228.88 | 3425.56 | 0.881026  | -0.281816701 | 0.840932  |
| 633     | 487.5   | 0.945865  | -0.116237131 | 0.893755  |
| 241.5   | 246.5   | 0.933499  | -0.131244533 | 0.917745  |
| 3       | 3       | 0.87225   | -0.263034406 | 0.87225   |
| 41      | 31.5    | 0.930228  | 0.118181426  | 0.747267  |
| 948     | 964.5   | 0.96165   | -0.086226884 | 0.950165  |
| 0.5     | 1       | 0.18169   | 1.584962501  | 0.450185  |
| 3053    | 3550.5  | 0.851881  | -0.42341013  | 0.760626  |
| 594.5   | 633     | 0.879091  | -0.270089163 | 0.834129  |
| 8833.5  | 9033.74 | 0.685446  | -0.465474677 | 0.661968  |
| 1.50001 | 0.2312  | 0.198259  | -1.584972119 | 0.68808   |
| 2.99999 | 0.7688  | 0.623771  | -0.584957692 | 0.550382  |
| 6278.24 | 6671.06 | 0.777901  | -0.336548392 | 0.715117  |
| 516     | 556.5   | 0.93962   | -0.119443552 | 0.880505  |
| 89052.4 | 90753.7 | 0.0634502 | -1.552553984 | 0.0593034 |
| 32230.9 | 32316.4 | 0.349315  | -0.917767632 | 0.347009  |
| 727.503 | 830.5   | 0.513151  | -1.068017534 | 0.416642  |
| 380.5   | 326     | 0.942287  | -0.104147093 | 0.93903   |
| 208.5   | 207.5   | 0.946479  | -0.122702992 | 0.94962   |
| 4236    | 4475.5  | 0.669114  | -0.518812312 | 0.614339  |
| 2812.58 | 2924.43 | 0.832359  | -0.325474326 | 0.800351  |
| 1876.5  | 1720.5  | 0.954079  | -0.089193729 | 0.982231  |
| 2558.5  | 2546.5  | 0.755964  | -0.459220178 | 0.75996   |
| 1001    | 1054    | 0.898388  | -0.229133999 | 0.86225   |
| 795.5   | 883     | 0.897208  | -0.25416868  | 0.828571  |
| 753     | 602     | 0.819812  | -0.263034406 | 0.962909  |
| 8       | 2.5     | 0.639888  | 0.584962501  | 0.305841  |
| 648.5   | 617     | 0.827221  | -0.382410049 | 0.862631  |
| 2050.5  | 2034    | 0.750838  | -0.688877073 | 0.755856  |
| 465.5   | 487     | 0.221894  | -0.859822342 | 0.188631  |
| 1201    | 1088.5  | 0.677733  | -0.479313449 | 0.779193  |
| 944.502 | 859.501 | 0.562072  | -0.514901397 | 0.67998   |



|         |         |           |              |           |
|---------|---------|-----------|--------------|-----------|
| 89.5    | 78      | 0.558665  | -1.35453276  | 0.640513  |
| 594.499 | 640.498 | 0.998163  | 0.003630686  | 0.945506  |
| 5942.34 | 6811.1  | 0.795918  | -0.407020484 | 0.682892  |
| 239     | 306.5   | 0.577162  | -0.530179401 | 0.317592  |
| 62      | 70.5    | 0.727172  | -0.668794092 | 0.636098  |
| 364.5   | 352.5   | 0.60387   | -0.549773072 | 0.640339  |
| 1798.5  | 2379.5  | 0.971238  | 0.049283896  | 0.766733  |
| 1       | 1.5     | 1         | 0            | 0.756486  |
| 2271.5  | 2339    | 0.810427  | -0.387878358 | 0.787376  |
| 2       | 3       | 0.648511  | -2           | 0.462019  |
| 598     | 644     | 0.984047  | 0.03456436   | 0.965358  |
| 10927   | 12481   | 0.0837423 | -0.8700419   | 0.0439155 |
| 3933.04 | 3924.08 | 0.529567  | -0.506290226 | 0.532516  |
| 905.5   | 1027    | 0.887931  | -0.248923643 | 0.795582  |
| 2298    | 2302.5  | 0.883616  | -0.197496289 | 0.881855  |
| 915     | 811.5   | 0.639456  | -0.466940526 | 0.779033  |
| 1210    | 1298    | 0.898079  | -0.240791332 | 0.850604  |
| 2357.5  | 2069.5  | 0.434667  | -0.548853583 | 0.619253  |
| 0       | 0.5     | 0.450185  | #DIV/0!      | 1         |
| 6433    | 7323    | 0.917727  | -0.166453079 | 0.815398  |
| 1205.5  | 1127.51 | 0.700445  | -0.541928978 | 0.758982  |
| 2266    | 2420.5  | 0.567568  | -0.650576754 | 0.50227   |
| 1138    | 1139.5  | 0.401451  | -0.582429234 | 0.399814  |
| 311     | 230.5   | 0.486501  | -0.714716732 | 0.806727  |
| 886.005 | 1062.5  | 0.880119  | 0.252539833  | 0.995019  |
| 199.5   | 196     | 0.835264  | -0.368781908 | 0.847822  |
| 3057.5  | 2702.5  | 0.846287  | -0.280360721 | 0.946881  |
| 479     | 428.5   | 0.69757   | -0.595542816 | 0.787561  |
| 2245.5  | 2411.5  | 0.686059  | -0.492124169 | 0.614805  |
| 2       | 0.5     | 0.825659  | 0.321928095  | 0.407544  |
| 6220    | 5256.5  | 0.889437  | -0.234192404 | 0.996244  |
| 6       | 3.5     | 1         | 0            | 0.662394  |
| 1133.01 | 1125.5  | 0.711638  | -0.380244392 | 0.719337  |
| 1258.5  | 1250    | 0.836957  | -0.320209578 | 0.842374  |
| 413.5   | 357.5   | 0.577731  | -0.6473494   | 0.723035  |
| 342.41  | 337.681 | 0.751045  | -0.479825525 | 0.762617  |
| 344     | 133.5   | 0.902847  | -0.166521491 | 0.583743  |
| 6.5     | 4.5     | 0.941228  | -0.115477217 | 0.825659  |
| 26.5    | 2       | 0.318248  | -2.920565533 | 0.94283   |
| 114     | 95.5    | 0.894178  | -0.153409915 | 0.935399  |
| 7674.44 | 7108.96 | 0.717593  | -0.475578791 | 0.78848   |
| 2882.5  | 3036.5  | 0.880797  | -0.266090699 | 0.843658  |
| 761.5   | 438     | 0.031611  | -1.115319347 | 0.479432  |
| 17      | 20      | 0.845346  | -0.280107919 | 0.699495  |
| 3.5     | 3       | 0.198892  | -0.807354922 | 0.353387  |
| 10      | 3       | 0.908899  | -0.074000581 | 0.204385  |
| 0       | 0       | ?         | #DIV/0!      | ?         |
| 104.5   | 95.4999 | 0.971966  | 0.0541921    | 0.909169  |
| 22.5    | 5.5     | 0.675695  | -0.537656786 | 0.556615  |
| 0       | 0.5     | 1         | #DIV/0!      | 0.308068  |
| 2034    | 2526.5  | 0.945125  | 0.126564892  | 0.910151  |
| 2047    | 2210.5  | 0.635108  | -0.478676706 | 0.547944  |
| 1092    | 1058.5  | 0.957224  | -0.08644509  | 0.979778  |
| 1828.22 | 1586.93 | 0.705733  | -0.482724238 | 0.838109  |
| 618     | 574     | 0.810584  | -0.346650524 | 0.872671  |
| 1476    | 1527.5  | 0.834527  | -0.372658897 | 0.809873  |

|         |         |          |              |          |
|---------|---------|----------|--------------|----------|
| 1713.5  | 1796.5  | 0.538633 | -0.744845349 | 0.494702 |
| 923.5   | 898     | 0.623679 | -0.924672156 | 0.643235 |
| 1400.01 | 1434.51 | 0.804739 | -0.335527465 | 0.782414 |
| 417.5   | 440     | 0.918225 | -0.2057865   | 0.88538  |
| 1096.88 | 1115.05 | 0.803129 | -0.483074935 | 0.792063 |
| 9707.01 | 9683.72 | 0.710171 | -0.593945752 | 0.712089 |
| 0       | 1.5     | 1        | #DIV/0!      | 0.308068 |
| 716     | 836     | 0.646736 | -1.132876596 | 0.554215 |
| 744.16  | 772.527 | 0.768081 | -0.548426277 | 0.741593 |
| 730     | 788     | 0.779038 | -0.441631709 | 0.716415 |
| 228.5   | 259     | 0.764704 | -0.496200352 | 0.66536  |
| 485     | 481.5   | 0.696336 | -0.581990934 | 0.702446 |
| 1125.07 | 1148.59 | 0.816661 | -0.377692456 | 0.800548 |
| 7008.94 | 6313.39 | 0.756792 | -0.334222971 | 0.87119  |
| 2471.02 | 2071.04 | 0.633279 | -0.546786452 | 0.813308 |
| 2806.5  | 2543.5  | 0.739515 | -0.531971941 | 0.815986 |
| 2302.5  | 2081.5  | 0.479892 | -0.660200279 | 0.594141 |
| 1120    | 973.5   | 0.778921 | -0.369394834 | 0.905353 |
| 2953.13 | 3019.23 | 0.904867 | -0.211510019 | 0.8894   |
| 2816.48 | 2673.05 | 0.770128 | -0.382200831 | 0.818878 |
| 713.5   | 672.5   | 0.675481 | -0.502921651 | 0.734714 |
| 2178.5  | 2197    | 0.730088 | -0.52306536  | 0.723025 |
| 1566.49 | 1515.98 | 0.514771 | -0.705691559 | 0.547961 |
| 2486.02 | 2377.02 | 0.673516 | -0.555534726 | 0.715058 |
| 4929.9  | 4735.12 | 0.672498 | -0.631842192 | 0.706209 |
| 6326.5  | 5673    | 0.684696 | -0.703307319 | 0.764556 |
| 1220.51 | 1277.49 | 0.965368 | -0.069000505 | 0.930849 |
| 1222    | 883     | 0.40623  | -1.055356225 | 0.684226 |
| 2510.5  | 2374.5  | 0.765455 | -0.373406154 | 0.819444 |
| 684     | 595.5   | 0.698944 | -0.383053552 | 0.861763 |
| 1790.5  | 1626.5  | 0.614985 | -0.594161197 | 0.710938 |
| 485.5   | 526     | 0.944089 | -0.122427585 | 0.887211 |
| 2256    | 2414    | 0.884816 | -0.276913995 | 0.839468 |
| 1359.5  | 1456.51 | 0.89554  | -0.25215793  | 0.849789 |
| 4246.5  | 4713.3  | 0.826346 | -0.419490395 | 0.753925 |
| 3988.5  | 4185.5  | 0.821625 | -0.41666613  | 0.787707 |
| 1240.51 | 1076.99 | 0.563297 | -0.658326641 | 0.706222 |
| 2371    | 2540.5  | 0.808363 | -0.438140741 | 0.758324 |
| 1363    | 1548.5  | 0.996678 | -0.007428384 | 0.908956 |
| 2171    | 2157    | 0.626873 | -0.648994672 | 0.632759 |
| 998     | 936.499 | 0.779212 | -0.378871185 | 0.836593 |
| 975.5   | 970.5   | 0.818313 | -0.472617184 | 0.821558 |
| 1351    | 1481.5  | 0.993504 | 0.016985568  | 0.953553 |
| 914     | 875     | 0.776498 | -0.44158766  | 0.811505 |
| 1861.49 | 2072.99 | 0.907408 | -0.208940247 | 0.830811 |
| 1319    | 1405.5  | 0.784085 | -0.417591911 | 0.730796 |
| 10010.1 | 9541.64 | 0.717085 | -0.548540506 | 0.756725 |
| 1901    | 2165    | 0.902571 | -0.24508439  | 0.81779  |
| 2060.51 | 2193.96 | 0.870381 | -0.283402449 | 0.824354 |
| 13792.4 | 14636.5 | 0.884037 | -0.304825663 | 0.847405 |
| 419     | 420.5   | 0.437298 | -0.691215705 | 0.43346  |
| 1027.5  | 1133    | 0.846203 | -0.359264246 | 0.777056 |
| 166.5   | 158.5   | 0.817544 | -0.357010554 | 0.856765 |
| 17      | 7       | 0.912312 | 0.160464672  | 0.524625 |
| 543     | 475.5   | 0.960966 | 0.063668194  | 0.854613 |
| 525.001 | 493     | 0.695522 | -0.603630284 | 0.746614 |

|         |         |           |              |           |
|---------|---------|-----------|--------------|-----------|
| 3124.5  | 2720    | 0.69267   | -0.493065664 | 0.825294  |
| 800.5   | 762     | 0.693974  | -0.567941995 | 0.736379  |
| 957     | 1008.5  | 0.921928  | -0.189848114 | 0.888152  |
| 13665.5 | 14452.5 | 0.0387659 | -1.398122353 | 0.0308862 |
| 1317    | 1409.5  | 0.665205  | -0.530149616 | 0.59822   |
| 1824.02 | 1953.02 | 0.612674  | -0.621625886 | 0.546971  |
| 1780.5  | 1476.5  | 0.771141  | -0.337098958 | 0.957778  |
| 1364.5  | 1298.5  | 0.404762  | -0.877909464 | 0.450843  |
| 407     | 331.5   | 0.807046  | -0.409141721 | 0.951295  |
| 2       | 0.5     | 1         | 0            | 0.567924  |
| 50.5    | 39.5    | 0.9869    | -0.028854863 | 0.869908  |
| 606.501 | 570     | 0.813104  | -0.352582511 | 0.864041  |
| 2994.5  | 2693.5  | 0.638167  | -0.54107215  | 0.746907  |
| 1575.49 | 1585.01 | 0.803244  | -0.34314704  | 0.797816  |
| 1674    | 1565.5  | 0.748592  | -0.431796412 | 0.809391  |
| 416.5   | 427     | 0.801402  | -0.463767946 | 0.783865  |
| 2254.5  | 2530    | 0.854623  | -0.302146883 | 0.764105  |
| 3806.47 | 4812.93 | 0.906652  | -0.246132118 | 0.754711  |
| 771.999 | 965.497 | 0.947278  | -0.126880601 | 0.79379   |
| 1746    | 1677    | 0.875475  | -0.228741228 | 0.908767  |
| 1.5     | 1.5     | 0.513713  | -1.584962501 | 0.513713  |
| 7.5     | 12      | 0.407938  | -1.906890596 | 0.179294  |
| 1094.5  | 1479    | 0.995547  | -0.011247851 | 0.797602  |
| 776.5   | 837     | 0.820609  | -0.418447761 | 0.767297  |
| 1707.5  | 2123.5  | 0.862251  | -0.331996531 | 0.70754   |
| 2469    | 2628.5  | 0.947613  | -0.129840058 | 0.908504  |
| 964.5   | 1096    | 0.864629  | -0.341884785 | 0.779983  |
| 1900.5  | 1898.5  | 0.869399  | -0.292715328 | 0.870137  |
| 1031.01 | 994.498 | 0.849676  | -0.265025588 | 0.880977  |
| 1084    | 1065    | 0.870054  | -0.329768395 | 0.881065  |
| 2933.5  | 3244.5  | 0.835752  | -0.429287879 | 0.770622  |
| 32      | 26      | 0.726271  | -0.476438044 | 0.906136  |
| 3035    | 2958.5  | 0.663341  | -0.600975349 | 0.686129  |
| 236     | 209.5   | 0.670684  | -0.827360614 | 0.750312  |
| 1896.5  | 1934    | 0.974407  | -0.052284297 | 0.960205  |
| 1714.99 | 1641.5  | 0.923779  | 0.169638021  | 0.897801  |
| 167.5   | 209.5   | 0.71763   | -0.912283854 | 0.58491   |
| 156     | 122     | 0.595149  | -0.927850214 | 0.769737  |
| 3797    | 3677.5  | 0.709275  | -0.543299744 | 0.736666  |
| 0.5     | 1.5     | 0.613399  | 1.584962501  | 1         |
| 1349    | 1418    | 0.660699  | -0.399789505 | 0.597949  |
| 1837.47 | 1686.97 | 0.410529  | -1.527218922 | 0.465367  |
| 6732.57 | 5639.59 | 0.591627  | -1.00789227  | 0.712433  |
| 5233.23 | 4534.53 | 0.734777  | -0.723250684 | 0.821645  |
| 285.5   | 509     | 0.729649  | -1.293160791 | 0.44311   |
| 1418    | 1046    | 0.514146  | -1.811430334 | 0.672272  |
| 0.5     | 1       | 0.622002  | #NUM!        | 0.353387  |
| 1608.69 | 1832.44 | 0.619214  | -0.582502845 | 0.490462  |
| 1190.5  | 1108    | 0.961756  | -0.080360793 | 0.989321  |
| 488     | 532.5   | 0.894052  | -0.261852353 | 0.8369    |
| 9.5     | 10      | 0.754275  | -0.662965013 | 0.721301  |
| 5783.58 | 6083.42 | 0.876807  | -0.283856088 | 0.841707  |
| 2494.5  | 2508    | 0.95699   | -0.094401632 | 0.953321  |
| 41.5    | 34.5    | 0.597482  | -0.883186335 | 0.734766  |
| 2240.82 | 2034.23 | 0.707851  | -0.519745908 | 0.793071  |
| 1105.5  | 851     | 0.940713  | -0.08742206  | 0.829002  |

|         |         |           |              |          |
|---------|---------|-----------|--------------|----------|
| 7       | 0.5     | 0.793009  | -0.222392421 | 0.212937 |
| 10      | 11.5    | 0.752937  | 0.584962501  | 0.824785 |
| 4094.5  | 3578.5  | 0.831325  | -0.199987567 | 0.995491 |
| 749.5   | 532     | 0.95906   | 0.067682797  | 0.720956 |
| 9       | 10.5    | 0.617401  | -1           | 0.512728 |
| 731.5   | 600     | 0.67972   | -0.526029367 | 0.863245 |
| 1433.5  | 1403.5  | 0.657886  | -0.614191005 | 0.676683 |
| 7033.5  | 6911    | 0.302831  | -0.649456502 | 0.322605 |
| 2506    | 2315    | 0.111958  | -0.896708005 | 0.159335 |
| 2901.5  | 1988.5  | 0.365405  | -0.870951408 | 0.766358 |
| 8712    | 8797    | 0.56071   | -0.731373693 | 0.551741 |
| 9334.5  | 8393.5  | 0.515631  | -0.765109782 | 0.617645 |
| 6902.5  | 7268.5  | 0.44926   | -0.730535454 | 0.397742 |
| 10727.5 | 7928    | 0.148392  | -0.922312502 | 0.45017  |
| 6153.5  | 5523.5  | 0.0508059 | -1.066327325 | 0.084523 |
| 1412.5  | 1691.5  | 0.933458  | -0.177477391 | 0.821952 |
| 1218.5  | 1424    | 0.872104  | -0.324594541 | 0.768727 |
| 2302.5  | 2209.5  | 0.814796  | -0.362838638 | 0.847723 |
| 5568.5  | 4610.5  | 0.554201  | -0.59073861  | 0.767225 |
| 49      | 44      | 1         | 0            | 0.934737 |
| 1611    | 1554    | 0.463363  | -0.569596768 | 0.509055 |
| 479.5   | 465.5   | 0.690155  | -0.615368158 | 0.714365 |
| 1167.5  | 1058.5  | 0.56371   | -0.659780185 | 0.662502 |
| 4702.5  | 4809.33 | 0.267193  | -1.020572273 | 0.250623 |
| 1368.01 | 1515.99 | 0.855301  | 0.268646221  | 0.931316 |
| 189     | 107.5   | 0.651495  | -0.539874611 | 0.860972 |
| 228     | 193     | 0.499304  | -1.86710573  | 0.588344 |
| 5703.5  | 5870    | 0.816836  | -0.371232437 | 0.794049 |
| 1938.49 | 2063    | 0.856032  | -0.299572304 | 0.80803  |
| 4842.25 | 5269.06 | 0.800264  | -0.429858367 | 0.735417 |
| 70.9311 | 79.4512 | 0.787663  | -0.557026042 | 0.712775 |
| 1500.57 | 1784.06 | 0.872501  | -0.307180858 | 0.75176  |
| 263.5   | 280     | 0.930341  | -0.168215039 | 0.891025 |
| 2794.5  | 2628.5  | 0.620289  | -0.618651725 | 0.678884 |
| 1178    | 1292.51 | 0.817282  | -0.394781783 | 0.746485 |
| 1367.06 | 1230.51 | 0.803978  | -0.384636002 | 0.886429 |
| 210     | 281     | 0.972615  | -0.063193826 | 0.762254 |
| 2584.5  | 2534.5  | 0.782193  | -0.423903016 | 0.798164 |
| 643.111 | 438.29  | 0.900265  | -0.170309219 | 0.816311 |
| 2018.5  | 1886    | 0.820571  | -0.415394912 | 0.86684  |
| 3144    | 3011.5  | 0.844167  | -0.32118262  | 0.876604 |
| 4802.45 | 5500.61 | 0.922408  | -0.201583243 | 0.837302 |
| 1058.49 | 1022.5  | 0.810904  | -0.446015566 | 0.834495 |
| 1953    | 1700.5  | 0.797503  | -0.44665334  | 0.89451  |
| 1697.5  | 1951.5  | 0.863129  | -0.306605425 | 0.760161 |
| 244.243 | 298.079 | 0.974957  | -0.064789633 | 0.850606 |
| 1180    | 1182    | 0.798954  | -0.518946305 | 0.797864 |
| 1278    | 1299    | 0.832593  | -0.383034182 | 0.821098 |
| 2913.5  | 3429    | 0.988282  | -0.031032278 | 0.891376 |
| 160.5   | 140     | 0.683911  | -0.891801259 | 0.766812 |
| 1034.51 | 1129.99 | 0.914404  | -0.212220357 | 0.857422 |
| 1090    | 1163    | 0.91404   | -0.204416046 | 0.870962 |
| 3296.95 | 3379.51 | 0.785683  | -0.483543817 | 0.767649 |
| 374.5   | 392.5   | 0.983629  | -0.039046904 | 0.954194 |
| 978     | 1069.5  | 0.971819  | -0.067957384 | 0.914745 |
| 310     | 326     | 0.88129   | -0.22084197  | 0.838925 |

|         |         |          |              |          |
|---------|---------|----------|--------------|----------|
| 1039.5  | 930.5   | 0.973608 | 0.055141554  | 0.902927 |
| 891.5   | 994.5   | 0.962648 | -0.084134144 | 0.887003 |
| 2035.5  | 1738.5  | 0.651233 | -0.803815433 | 0.763485 |
| 2315    | 2417    | 0.85225  | -0.312610333 | 0.81965  |
| 3164    | 3394.5  | 0.831192 | -0.375755627 | 0.779464 |
| 8587    | 8619    | 0.632193 | -0.715067422 | 0.629088 |
| 3167    | 3083    | 0.894004 | -0.218184818 | 0.913899 |
| 238.501 | 344.5   | 0.955254 | 0.132821148  | 0.840107 |
| 1030    | 1201.5  | 0.926727 | -0.191444999 | 0.830225 |
| 717.626 | 698.882 | 0.656515 | -0.819927123 | 0.675336 |
| 4305.06 | 4780.08 | 0.891387 | -0.246043925 | 0.816644 |
| 1628    | 1676.5  | 0.875732 | -0.294388839 | 0.855995 |
| 7239    | 8632.08 | 0.896134 | -0.279638372 | 0.78589  |
| 2676    | 2901.48 | 0.970731 | -0.074397885 | 0.921834 |
| 344     | 312     | 0.971224 | 0.063583206  | 0.912067 |
| 1206.5  | 1070    | 0.648805 | -0.524945227 | 0.771889 |
| 1127.5  | 1206.5  | 0.743296 | -0.480700235 | 0.684587 |
| 1176    | 1191    | 0.582716 | -0.692868907 | 0.570894 |
| 2544.47 | 3165.01 | 0.818288 | -0.503751101 | 0.678085 |
| 309     | 273.5   | 0.638599 | -0.499973558 | 0.772426 |
| 687.5   | 587.5   | 0.761554 | -0.387668949 | 0.906857 |
| 1242.5  | 1164.49 | 0.745717 | -0.483795675 | 0.799635 |
| 3930.5  | 4734.99 | 0.984279 | -0.040762592 | 0.869681 |
| 1       | 1       | 0.710482 | -1           | 0.710482 |
| 3.5     | 7.5     | 0.200228 | -1.807354922 | 0.023793 |
| 1.50612 | 9.53935 | 0.557531 | 1.88769768   | 0.566774 |
| 325.499 | 337.502 | 0.943239 | -0.127335939 | 0.918578 |
| 715     | 836.5   | 0.798243 | -0.411678487 | 0.670225 |
| 3017.5  | 2917    | 0.662918 | -0.651496252 | 0.691246 |
| 107     | 101     | 0.899498 | -0.210085526 | 0.940924 |
| 26.5    | 32      | 0.944489 | -0.11321061  | 0.795204 |
| 2315    | 2277    | 0.523135 | -0.547895326 | 0.54344  |
| 1502    | 1308    | 0.566324 | -0.577537641 | 0.721981 |
| 632.001 | 595.502 | 0.77459  | -0.398396026 | 0.827    |
| 684     | 706.5   | 0.902125 | -0.241679366 | 0.881472 |
| 3771.5  | 3421.5  | 0.70724  | -0.628848668 | 0.780549 |
| 3168.95 | 2486.35 | 0.631021 | -0.510861083 | 0.891748 |
| 1657.5  | 1581.18 | 0.742673 | -0.53744622  | 0.779104 |
| 5627.5  | 6103.5  | 0.823992 | -0.455990818 | 0.771159 |
| 1064    | 1138    | 0.70343  | -0.790839835 | 0.658981 |
| 1836.5  | 2446.5  | 0.854007 | -0.298261658 | 0.616561 |
| 3730.5  | 3820    | 0.616521 | -0.908777136 | 0.599429 |
| 350     | 288.5   | 0.707038 | -0.59946207  | 0.854422 |
| 2       | 1       | 0.308068 | -2           | 0.710482 |
| 4784.5  | 6012.5  | 0.759319 | -0.64436512  | 0.605821 |
| 1129.5  | 940.5   | 0.939887 | -0.116328993 | 0.930305 |
| 12.5    | 13      | 0.52037  | -1.058893689 | 0.491355 |
| 1110    | 975     | 0.601375 | -0.626496001 | 0.728517 |
| 33.5    | 42      | 0.920433 | 0.143364175  | 0.88664  |
| 4591    | 6835.46 | 0.813846 | -0.654817712 | 0.59009  |
| 5560.74 | 6650.61 | 0.769235 | -0.585803341 | 0.645446 |
| 16150   | 15520.3 | 0.629023 | -0.611681634 | 0.666776 |
| 834.5   | 878.5   | 0.805428 | -0.51494368  | 0.772608 |
| 2659.5  | 2545    | 0.864518 | -0.204511813 | 0.908272 |
| 11561.3 | 11779   | 0.719124 | -0.55506425  | 0.703745 |
| 4525.5  | 4069    | 0.564834 | -0.670409393 | 0.670426 |

|         |         |          |              |           |
|---------|---------|----------|--------------|-----------|
| 46.5    | 27.5    | 0.723668 | -0.473069621 | 0.869168  |
| 404.999 | 459.5   | 0.963663 | 0.081376859  | 0.952087  |
| 288     | 316.5   | 0.894361 | -0.22155777  | 0.822453  |
| 1       | 0       | 0.515664 | 1.321928095  | 0.308068  |
| 140     | 244.5   | 0.805567 | -0.605721061 | 0.456     |
| 2342.54 | 2357.47 | 0.857821 | -0.329277148 | 0.853457  |
| 1069.16 | 1126.61 | 0.801471 | -0.472189675 | 0.764862  |
| 1       | 2       | 0.785812 | 0.584962501  | 0.785812  |
| 17      | 4       | 0.316234 | -1           | 0.570355  |
| 123.5   | 194.5   | 0.649799 | -1.065724182 | 0.368519  |
| 3855    | 4328    | 0.879907 | -0.251405116 | 0.7904    |
| 2475    | 2330    | 0.520294 | -0.770381006 | 0.577266  |
| 155.5   | 332     | 0.889081 | -0.344132831 | 0.40667   |
| 3027    | 3447    | 0.93265  | -0.117623553 | 0.815588  |
| 62261   | 70084.2 | 0.533099 | -0.566720515 | 0.401939  |
| 343     | 565.5   | 0.179946 | -2.467868456 | 0.0524468 |
| 1687    | 1650    | 0.769409 | -0.49082457  | 0.786257  |
| 184.5   | 245     | 0.895027 | -0.274811574 | 0.706255  |
| 7       | 12      | 0.765621 | 0.716207034  | 0.973354  |
| 2       | 5       | 0.920936 | 0.321928095  | 0.627217  |
| 4.5     | 5       | 0.63092  | 0.736965594  | 0.686947  |
| 506.5   | 559.5   | 0.739741 | -0.613731052 | 0.667592  |
| 597.5   | 828.002 | 0.819394 | -0.508549385 | 0.607084  |
| 1446.5  | 1423.5  | 0.845032 | -0.262336416 | 0.859599  |
| 1.5     | 2.5     | 0.651448 | -0.584962501 | 0.230584  |
| 1510    | 1473    | 0.804112 | -0.372362242 | 0.824644  |
| 70      | 60.5    | 0.982583 | -0.031250934 | 0.907425  |
| 92      | 87.5    | 0.634883 | -0.795641501 | 0.67303   |
| 2594.5  | 2733.5  | 0.889048 | -0.256100359 | 0.853072  |
| 3.5     | 2       | 0.428621 | -1.807354922 | 0.739226  |
| 2828    | 2772    | 0.744008 | -0.52158649  | 0.759891  |
| 751     | 845     | 0.922951 | -0.201729916 | 0.850084  |
| 1995    | 2303.5  | 0.952287 | -0.12572812  | 0.864783  |
| 1497    | 1605.5  | 0.875772 | -0.337796023 | 0.833501  |
| 2195.59 | 2460.84 | 0.973537 | -0.069353473 | 0.90574   |
| 7143    | 7015.5  | 0.610431 | -0.644178121 | 0.627442  |
| 1252.5  | 1400.5  | 0.821109 | -0.377705552 | 0.733844  |
| 2321.5  | 1757    | 0.511862 | -0.631538197 | 0.830697  |
| 2497    | 2210.5  | 0.482494 | -0.663928286 | 0.620175  |
| 871     | 1007    | 0.978072 | -0.04542972  | 0.868541  |
| 1935.5  | 2011    | 0.856772 | -0.31023577  | 0.828539  |
| 3456    | 3441.9  | 0.691154 | -0.444825776 | 0.695534  |
| 2164    | 2072.5  | 0.624033 | -0.663743016 | 0.662808  |
| 5979.39 | 5612.97 | 0.624299 | -0.602853963 | 0.685594  |
| 3547.5  | 3612.5  | 0.829651 | -0.331619206 | 0.814865  |
| 1076    | 1149    | 0.836774 | -0.348654831 | 0.786902  |
| 399.276 | 384.3   | 0.794772 | -0.40241748  | 0.825531  |
| 1165    | 1632.5  | 0.770603 | -0.709368036 | 0.562759  |
| 1159.5  | 979     | 0.656141 | -0.658668424 | 0.795339  |
| 1051.01 | 1036.98 | 0.88001  | -0.27184362  | 0.889234  |
| 1953    | 1714.01 | 0.804792 | -0.316784792 | 0.924946  |
| 3086    | 3017.9  | 0.699554 | -0.618542561 | 0.717268  |
| 1599.33 | 1707.77 | 0.762018 | -0.371987349 | 0.695887  |
| 2167    | 2101    | 0.778965 | -0.429534827 | 0.804227  |
| 3970    | 3755.5  | 0.754345 | -0.529445104 | 0.795911  |
| 1738.5  | 1664.5  | 0.76648  | -0.521048662 | 0.798078  |

|         |         |          |              |          |
|---------|---------|----------|--------------|----------|
| 7253    | 7039.5  | 0.2681   | -0.841012206 | 0.294961 |
| 4293.5  | 4276.5  | 0.773473 | -0.520561913 | 0.776311 |
| 748     | 687     | 0.807316 | -0.320482267 | 0.885048 |
| 248.498 | 303.632 | 0.983418 | -0.040577958 | 0.852096 |
| 1125.5  | 1089.5  | 0.907228 | -0.192370427 | 0.930889 |
| 0       | 0       | 0.308068 | #DIV/0!      | 0.308068 |
| 1843    | 1768.5  | 0.826092 | -0.298055688 | 0.863094 |
| 0       | 1.5     | 1        | #DIV/0!      | 0.308068 |
| 1101    | 871     | 0.73614  | -0.376678299 | 0.975298 |
| 541     | 309     | 0.216764 | -2.414148867 | 0.514891 |
| 255.5   | 409     | 0.943468 | -0.111483108 | 0.534804 |
| 930     | 1178    | 0.253102 | -1.058570541 | 0.122484 |
| 217     | 247     | 0.982541 | -0.040452044 | 0.895702 |
| 220     | 234     | 0.712001 | -0.586602859 | 0.661981 |
| 9       | 14      | 0.900374 | -0.169925001 | 0.474021 |
| 0.5     | 2       | 0.785812 | #NUM!        | 0.320255 |
| 1627    | 1681    | 0.756756 | -0.429593796 | 0.727238 |
| 0       | 5.5     | 0.365865 | #DIV/0!      | 0.716912 |
| 336.501 | 270.499 | 0.975464 | -0.054612526 | 0.895439 |
| 642     | 594.998 | 0.512162 | -0.730239731 | 0.587979 |
| 972.886 | 813.702 | 0.807717 | -0.299182305 | 0.975329 |
| 1712.97 | 1181.5  | 0.61605  | -0.522522717 | 0.991341 |
| 132.5   | 95      | 0.794877 | -0.40599236  | 0.967894 |
| 169     | 1381.51 | 0.924695 | 0.593474001  | 0.271264 |
| 144.043 | 205.553 | 0.651519 | -1.36300082  | 0.458198 |
| 36.5    | 46      | 0.791654 | 0.424885285  | 0.949131 |
| 478.5   | 342     | 0.57132  | -1.240597017 | 0.769775 |
| 327.5   | 283.5   | 0.961624 | -0.088564556 | 0.951801 |
| 168     | 148.5   | 0.818431 | -0.392317423 | 0.905999 |
| 251.5   | 234     | 0.878446 | 0.220342265  | 0.828253 |
| 140.5   | 121.5   | 0.989008 | -0.025901863 | 0.927614 |
| 25.5    | 8       | 0.31951  | 3.08246216   | 0.28455  |
| 437     | 646.504 | 0.855676 | -0.458606514 | 0.622632 |
| 2401    | 2464    | 0.874724 | -0.277406523 | 0.856232 |
| 2583.44 | 2818    | 0.907453 | -0.223642005 | 0.84982  |
| 1214    | 1130    | 0.881175 | -0.201158587 | 0.944093 |
| 2219.5  | 1981    | 0.867739 | -0.263099408 | 0.952695 |
| 1649.5  | 1797    | 0.850072 | -0.331361092 | 0.786832 |
| 302.5   | 319.5   | 0.861372 | -0.301212118 | 0.820997 |
| 1728    | 1586    | 0.800733 | -0.364718546 | 0.872781 |
| 1294.15 | 1394.81 | 0.867214 | -0.293968923 | 0.812579 |
| 3428    | 3394.5  | 0.712157 | -0.525193696 | 0.720769 |
| 694.5   | 595     | 0.55547  | -0.847373847 | 0.684363 |
| 1755    | 1828    | 0.916695 | -0.183397376 | 0.88793  |
| 730.5   | 712     | 0.729121 | -0.580525711 | 0.748702 |
| 1154.5  | 1940    | 0.862289 | -0.390054249 | 0.517648 |
| 1349.5  | 1275.5  | 0.52336  | -0.687402828 | 0.581397 |
| 3519.5  | 3379.5  | 0.841716 | -0.278322967 | 0.877091 |
| 1239.5  | 1242.5  | 0.685571 | -0.559580566 | 0.683401 |
| 7428.99 | 7484.02 | 0.851519 | -0.395689117 | 0.847021 |
| 7       | 8       | 0.494042 | -2.222392421 | 0.426447 |
| 1069.5  | 1296    | 0.805905 | -0.445253302 | 0.662682 |
| 157     | 159.5   | 0.964441 | -0.080301628 | 0.953998 |
| 5314.64 | 5116.47 | 0.888626 | -0.204914207 | 0.91979  |
| 2468.5  | 2514    | 0.803261 | -0.4608569   | 0.790466 |
| 2430    | 2292    | 0.667985 | -0.451918625 | 0.733439 |

|         |         |          |              |          |
|---------|---------|----------|--------------|----------|
| 167     | 192     | 0.867617 | 0.245652328  | 0.974198 |
| 81      | 72      | 0.663608 | 0.825056924  | 0.620668 |
| 720.5   | 698     | 0.744794 | -0.425420259 | 0.7746   |
| 713     | 843     | 0.961739 | -0.085440844 | 0.841979 |
| 546     | 553.5   | 0.845772 | -0.341213082 | 0.83593  |
| 3420    | 3451.5  | 0.64266  | -0.578333762 | 0.633799 |
| 38      | 38.5    | 0.854781 | 0.259867127  | 0.86431  |
| 2091.5  | 2156.5  | 0.869466 | -0.305382164 | 0.848575 |
| 2.5     | 3       | 1        | 0            | 0.892901 |
| 3746    | 3386.5  | 0.679034 | -0.648944046 | 0.759282 |
| 293     | 288     | 0.856149 | -0.249313018 | 0.871394 |
| 3215    | 3245    | 0.845663 | -0.342263992 | 0.838987 |
| 892     | 817     | 0.756419 | -0.398953776 | 0.838904 |
| 1561.48 | 1516.04 | 0.981062 | 0.036023172  | 0.959282 |
| 1453.5  | 1551.5  | 0.767794 | -0.37925624  | 0.704454 |
| 607.5   | 602.5   | 0.916302 | -0.187396138 | 0.921928 |
| 845     | 896     | 0.722112 | -0.559157855 | 0.674186 |
| 285     | 258.5   | 0.734053 | -0.503766418 | 0.81505  |
| 2717.55 | 2798.04 | 0.873382 | -0.243510717 | 0.849652 |
| 2202.5  | 2146    | 0.756176 | -0.516680152 | 0.776052 |
| 1446.5  | 1470    | 0.816576 | -0.391787667 | 0.804429 |
| 2387.5  | 2407.5  | 0.634256 | -0.921504615 | 0.628509 |
| 1758    | 1686    | 0.836907 | -0.321825518 | 0.869788 |
| 3224.5  | 3249    | 0.774023 | -0.440540633 | 0.767786 |
| 993     | 1099.5  | 0.889728 | -0.232842376 | 0.812212 |
| 70.4999 | 88      | 0.827366 | 0.445413195  | 0.945231 |
| 1017.5  | 1004.5  | 0.598503 | -0.629965995 | 0.611131 |
| 788.5   | 807     | 0.826781 | -0.282004181 | 0.804573 |
| 1896    | 1866.5  | 0.848133 | -0.323641171 | 0.859693 |
| 785.5   | 720     | 0.731255 | -0.547346521 | 0.799464 |
| 309     | 334     | 0.961182 | -0.086587685 | 0.907536 |
| 2099.5  | 1964    | 0.420095 | -0.665687593 | 0.497764 |
| 25.5    | 25.5    | 0.956883 | -0.087462841 | 0.956883 |
| 0.5     | 2.5     | 1        | 0            | 0.415333 |
| 101.5   | 109     | 0.795986 | 0.422126924  | 0.839263 |
| 96.5    | 193     | 0.835608 | -0.344529524 | 0.287256 |
| 786     | 786     | 0.871355 | -0.258635942 | 0.871355 |
| 32      | 29      | 0.821823 | 0.357552005  | 0.76482  |
| 1108    | 1108.99 | 0.737692 | -0.628931353 | 0.737066 |
| 1486.49 | 1394.98 | 0.629065 | -0.584217805 | 0.691639 |
| 2.5     | 3.5     | 0.770719 | -0.736965594 | 0.568955 |
| 1752.08 | 1595.88 | 0.747801 | -0.380197322 | 0.842255 |
| 2062.53 | 2273.56 | 0.828603 | -0.317984933 | 0.743972 |
| 2207.96 | 2037.98 | 0.750179 | -0.347370984 | 0.837563 |
| 3530    | 4205.5  | 0.714035 | -0.521895697 | 0.55817  |
| 30.5    | 42      | 0.722724 | 0.713118852  | 0.883113 |
| 1052.5  | 1074.5  | 0.844169 | -0.348733509 | 0.829349 |
| 4429.38 | 4818.22 | 0.736291 | -0.517412437 | 0.665866 |
| 1937.5  | 1983.5  | 0.345659 | -0.636892242 | 0.319456 |
| 1169.5  | 1221.5  | 0.906227 | -0.186753468 | 0.872287 |
| 431     | 549     | 0.44425  | -1.452336041 | 0.297452 |
| 2.5     | 2.5     | 0.733579 | -0.736965594 | 0.733579 |
| 595.005 | 517.68  | 0.724611 | -0.427521057 | 0.860814 |
| 2858    | 2855.5  | 0.865701 | -0.300570219 | 0.866317 |
| 3620    | 3523.03 | 0.612482 | -0.778753536 | 0.634499 |
| 1415.49 | 1281.47 | 0.691716 | -0.474147506 | 0.791244 |



|         |         |           |              |           |
|---------|---------|-----------|--------------|-----------|
| 737.563 | 732.07  | 0.849147  | -0.302758321 | 0.854977  |
| 3804.6  | 3720.84 | 0.879548  | -0.266004302 | 0.895144  |
| 304     | 295     | 0.756937  | -0.43094389  | 0.783657  |
| 2027    | 2197.5  | 0.856585  | -0.309173341 | 0.79588   |
| 15.5    | 16      | 0.779614  | -0.561878888 | 0.758593  |
| 431     | 1216    | 0.941525  | 0.208457873  | 0.456037  |
| 576.5   | 403.5   | 0.901155  | -0.091692014 | 0.637194  |
| 39      | 24      | 0.94932   | -0.09557766  | 0.752814  |
| 81      | 195.5   | 0.954711  | -0.130396637 | 0.362955  |
| 816.998 | 801.59  | 0.874079  | -0.275064651 | 0.887608  |
| 667     | 636     | 0.961669  | -0.081190391 | 0.994221  |
| 2483.5  | 2565    | 0.969612  | -0.072365782 | 0.949263  |
| 3193.5  | 3438.5  | 0.874064  | -0.34257372  | 0.829309  |
| 4259    | 3997    | 0.909844  | -0.193467968 | 0.953922  |
| 70.5    | 192.5   | 0.759604  | 0.743091697  | 0.63554   |
| 384     | 573.5   | 0.792018  | -0.681080655 | 0.553072  |
| 631.503 | 514.003 | 0.665129  | -0.640864117 | 0.832756  |
| 206     | 165     | 0.947662  | -0.11285334  | 0.91406   |
| 2527.5  | 2282.5  | 0.743032  | -0.456046473 | 0.832226  |
| 3290.5  | 3122    | 0.72787   | -0.511038649 | 0.772384  |
| 79.5    | 21.5    | 0.421391  | 0.59400764   | 0.108972  |
| 1.5     | 2.5     | 0.0805096 | #NUM!        | 0.0227138 |
| 35      | 39.5    | 0.926142  | -0.198545679 | 0.85327   |
| 2275.5  | 2098.5  | 0.885669  | -0.255635467 | 0.940201  |
| 23659.5 | 24059.5 | 0.863942  | -0.27163954  | 0.850774  |
| 7199.32 | 6799.55 | 0.829764  | -0.440820671 | 0.865058  |
| 7146.5  | 7084    | 0.902345  | -0.23364018  | 0.908017  |
| 2356.5  | 2070.5  | 0.842936  | 0.283650837  | 0.758693  |
| 3.5     | 5       | 0.767557  | 0.514573173  | 1         |
| 51.5    | 91.5    | 0.486947  | 1.493408563  | 0.681733  |
| 14.5    | 74      | 0.92877   | -0.465663572 | 0.220864  |
| 5       | 4       | 0.129088  | -1.736965594 | 0.234161  |
| 34      | 236     | 0.821261  | -1.180572246 | 0.0642509 |
| 0.5     | 57.5    | 0.972189  | 2            | 0.255941  |
| 705.002 | 763.501 | 0.320893  | 1.768849186  | 0.335127  |
| 1466.5  | 1108    | 0.482502  | 1.15889756   | 0.408779  |
| 983     | 535.998 | 0.98495   | 0.02183828   | 0.572886  |
| 1651.99 | 912.996 | 0.808989  | 0.258743001  | 0.450815  |
| 514     | 240     | 0.997266  | -0.004216355 | 0.547693  |
| 703.003 | 633.002 | 0.85623   | -0.281221368 | 0.936625  |
| 7.5     | 3.5     | 0.807419  | -0.447458977 | 0.807419  |
| 15      | 11.5    | 0.361333  | 1.359895945  | 0.304891  |
| 355.002 | 224.5   | 0.984746  | -0.030810023 | 0.756064  |
| 2       | 0.5     | 0.474021  | -1           | 0.710482  |
| 601.499 | 575.5   | 0.869499  | -0.231010334 | 0.907297  |
| 2213.51 | 2055    | 0.734601  | -0.434832174 | 0.804913  |
| 812.5   | 806.5   | 0.832191  | -0.379666241 | 0.837427  |
| 845     | 816.998 | 0.824314  | -0.325137176 | 0.8526    |
| 7614.6  | 8627.07 | 0.975773  | -0.057474589 | 0.89376   |
| 3332.5  | 3456.5  | 0.774502  | -0.388372456 | 0.7408    |
| 426     | 463.5   | 0.87773   | -0.252910189 | 0.812401  |
| 2524.5  | 2194.5  | 0.58403   | -0.852633317 | 0.694623  |
| 30.5    | 28      | 0.741608  | -0.538419915 | 0.807155  |
| 2480    | 2555.5  | 0.814549  | -0.372995728 | 0.790614  |
| 189     | 232.5   | 0.974557  | 0.063466419  | 0.895689  |
| 2385.47 | 2372.99 | 0.948247  | -0.102732907 | 0.952179  |

|         |         |          |              |          |
|---------|---------|----------|--------------|----------|
| 2080    | 2368    | 0.993117 | 0.01620829   | 0.922718 |
| 1159    | 1359    | 0.924984 | -0.189270351 | 0.821662 |
| 1017    | 906.5   | 0.752698 | -0.364395121 | 0.87065  |
| 912.491 | 899.002 | 0.820006 | -0.434922827 | 0.829978 |
| 3229.93 | 2959.45 | 0.88167  | -0.205282807 | 0.956164 |
| 365.5   | 385     | 0.833328 | -0.331333243 | 0.791395 |
| 1264.5  | 1363    | 0.654363 | -0.479392581 | 0.572358 |
| 6.5     | 3.5     | 0.468351 | -0.530514717 | 0.706667 |
| 5293.26 | 4828.5  | 0.682889 | -0.454039023 | 0.780974 |
| 0       | 0       | ?        | #DIV/0!      | ?        |
| 2       | 5.5     | 0.849775 | -1           | 0.421734 |
| 0       | 0       | 0.308068 | #DIV/0!      | 0.308068 |
| 312     | 306.5   | 0.911193 | -0.174266549 | 0.924882 |
| 4       | 2       | 0.651448 | -1           | 1        |
| 74.5    | 63.5    | 0.513173 | -1.464281018 | 0.609584 |
| 392     | 365.5   | 0.92453  | -0.190543555 | 0.965702 |
| 89      | 77.5    | 0.752603 | -0.655554469 | 0.837734 |
| 616.5   | 589.5   | 0.364212 | -2.256729829 | 0.387744 |
| 771     | 676     | 0.605747 | -0.61617246  | 0.73529  |
| 0.5     | 1       | 0.710482 | 1            | 1        |
| 44      | 60      | 0.965415 | -0.067114196 | 0.70037  |
| 232     | 227     | 0.805076 | -0.448590059 | 0.820359 |
| 772.5   | 789.001 | 0.973941 | -0.057143907 | 0.959623 |
| 4020    | 3864    | 0.76993  | -0.402886912 | 0.805318 |
| 2.5     | 1       | 0.544016 | -1.321928095 | 1        |
| 1402.5  | 1442.5  | 0.714755 | -0.577268109 | 0.69196  |
| 6100.91 | 7173.2  | 0.927893 | -0.177179553 | 0.820284 |
| 905     | 1202.5  | 0.949894 | -0.138779398 | 0.774918 |
| 9067.5  | 10269   | 0.856803 | -0.352784221 | 0.772389 |
| 4654    | 4826.5  | 0.797557 | -0.468936943 | 0.771619 |
| 5744.12 | 5947.44 | 0.819796 | -0.408582073 | 0.794779 |
| 2617.5  | 2829    | 0.929382 | -0.143606876 | 0.869807 |
| 7183    | 7525    | 0.694155 | -0.815840573 | 0.663478 |
| 208.5   | 206     | 0.867414 | -0.252692462 | 0.877181 |
| 1169    | 1259.5  | 0.830405 | -0.334633686 | 0.769403 |
| 142.5   | 109.5   | 0.624813 | -0.510961919 | 0.911049 |
| 1778    | 1747.5  | 0.921156 | -0.157151227 | 0.934209 |
| 1504    | 1272.98 | 0.529283 | -0.744022037 | 0.69041  |
| 975     | 814     | 0.685479 | -0.422454971 | 0.885896 |
| 1457.5  | 1605    | 0.982559 | -0.040656125 | 0.919249 |
| 5614.5  | 5611    | 0.853721 | -0.293809951 | 0.854207 |
| 5.5     | 2.5     | 1        | 0            | 0.635149 |
| 1865.5  | 2034    | 0.916255 | -0.140832792 | 0.836283 |
| 496     | 472     | 0.856345 | -0.297771447 | 0.893207 |
| 2047.52 | 2294    | 0.637974 | -1.220771564 | 0.572469 |
| 1583.5  | 1432.5  | 0.74212  | -0.544757141 | 0.817713 |
| 109     | 15.5    | 0.34823  | -1.790904401 | 0.833581 |
| 404     | 304.5   | 0.610546 | -0.544469317 | 0.910095 |
| 771.5   | 747.5   | 0.767241 | -0.481691692 | 0.791779 |
| 3949.15 | 4186.99 | 0.927832 | 0.163659202  | 0.963956 |
| 3711.53 | 3812.12 | 0.667345 | -0.546549524 | 0.641712 |
| 815     | 901     | 0.783912 | -0.470983904 | 0.707113 |
| 108533  | 123443  | 0.253103 | -0.781393361 | 0.157578 |
| 311     | 330     | 0.959262 | 0.089916637  | 0.997962 |
| 3360.05 | 3271.55 | 0.852849 | -0.347130753 | 0.870705 |
| 1243.01 | 1172.51 | 0.481161 | -0.581777144 | 0.553604 |

|         |         |          |              |          |
|---------|---------|----------|--------------|----------|
| 1874    | 2045    | 0.870354 | -0.313006257 | 0.811204 |
| 1612.5  | 1535.5  | 0.684808 | -0.541992462 | 0.729704 |
| 4154    | 3968    | 0.734922 | -0.424095745 | 0.779455 |
| 1030.5  | 1064.5  | 0.841705 | -0.33052865  | 0.816856 |
| 2676.5  | 2745    | 0.669815 | -0.515767218 | 0.644561 |
| 866.5   | 856.5   | 0.844348 | -0.302701524 | 0.853666 |
| 0.5     | 0.5     | 0.450185 | #NUM!        | 0.450185 |
| 1708    | 1642.5  | 0.525051 | -0.750117735 | 0.56239  |
| 3890.5  | 3908.5  | 0.898389 | -0.235960235 | 0.895301 |
| 4961.52 | 5343.22 | 0.848511 | -0.333901676 | 0.793822 |
| 4503.5  | 4420.5  | 0.819914 | -0.395153301 | 0.833437 |
| 896     | 968.5   | 0.935972 | -0.157200708 | 0.886205 |
| 2252    | 2171    | 0.8482   | -0.358503251 | 0.872651 |
| 96.5    | 78      | 0.452745 | -0.746966986 | 0.681714 |
| 3501.5  | 2575    | 0.881227 | -0.153537547 | 0.809274 |
| 1751.5  | 2004.5  | 0.488358 | -0.539557842 | 0.332649 |
| 18.5    | 11.5    | 0.582444 | -0.68589141  | 1        |
| 3644.53 | 3362.01 | 0.860637 | -0.261903504 | 0.925282 |
| 1307.5  | 1383    | 0.873833 | -0.288526151 | 0.834442 |
| 3653    | 3856.5  | 0.824136 | -0.419388331 | 0.786632 |
| 2427.5  | 2496.5  | 0.727513 | -0.569739536 | 0.705422 |
| 2357.5  | 2393    | 0.853679 | -0.323527726 | 0.842927 |
| 14674.5 | 14637.5 | 0.744532 | -0.509197051 | 0.746582 |
| 25201.9 | 23727.9 | 0.56706  | -0.755888572 | 0.621122 |
| 18828.3 | 17147.8 | 0.467294 | -1.308167176 | 0.531104 |
| 16078.6 | 13178   | 0.303912 | -1.514014406 | 0.437189 |
| 34660   | 35881.9 | 0.595967 | -0.693666733 | 0.564396 |
| 19361.7 | 17542.1 | 0.643969 | -0.549065464 | 0.742713 |
| 873.997 | 841.992 | 0.821688 | -0.381326312 | 0.849225 |
| 685     | 710     | 0.864514 | -0.275301935 | 0.836624 |
| 199     | 219     | 0.980181 | -0.040434864 | 0.908417 |
| 19      | 18      | 0.925532 | 0.144389909  | 0.888615 |
| 42.5    | 53      | 0.644896 | -0.681470482 | 0.45993  |
| 1692    | 1820    | 0.962591 | -0.083817016 | 0.912677 |
| 896.5   | 893.5   | 0.935299 | -0.136618706 | 0.937687 |
| 895     | 880.5   | 0.83273  | -0.404864436 | 0.843573 |
| 438     | 343     | 0.838871 | -0.309220655 | 0.979764 |
| 2091.99 | 1991.5  | 0.674081 | -0.627658872 | 0.715247 |
| 1337.5  | 1377.5  | 0.868633 | -0.288608022 | 0.847351 |
| 450     | 402.5   | 0.939956 | 0.149114814  | 0.882251 |
| 325.001 | 309.001 | 0.852753 | -0.280905266 | 0.893268 |
| 296     | 262     | 0.786206 | -0.395672174 | 0.887023 |
| 525     | 597     | 0.921668 | -0.198545679 | 0.839436 |
| 512     | 514     | 0.912728 | -0.195868979 | 0.910061 |
| 498     | 460.5   | 0.929558 | -0.173732304 | 0.976269 |
| 602.5   | 578.5   | 0.865272 | -0.333950623 | 0.890959 |
| 338     | 350     | 0.925412 | -0.181706075 | 0.903188 |
| 627     | 673.5   | 0.929448 | -0.164327312 | 0.881295 |
| 390     | 394     | 0.848166 | -0.312709565 | 0.840338 |
| 285.5   | 262     | 0.973052 | -0.054059127 | 0.966642 |
| 1210    | 1278.5  | 0.959512 | -0.101879614 | 0.926012 |
| 610     | 524     | 0.661697 | -0.647185914 | 0.787191 |
| 1283    | 1133    | 0.807008 | -0.422176778 | 0.894792 |
| 2364.5  | 1838.27 | 0.761969 | -0.512526271 | 0.937764 |
| 938     | 992.5   | 0.768369 | -0.455591598 | 0.721596 |
| 376.5   | 442     | 0.976309 | -0.052680317 | 0.862418 |

|         |         |          |              |          |
|---------|---------|----------|--------------|----------|
| 868.5   | 1013.5  | 0.929013 | -0.186842792 | 0.833048 |
| 477     | 509.5   | 0.836693 | -0.352881023 | 0.787111 |
| 55      | 50      | 0.696836 | -0.850622376 | 0.755259 |
| 869.5   | 899     | 0.674137 | -0.586622679 | 0.644393 |
| 702.5   | 644.5   | 0.678587 | -0.609297069 | 0.75107  |
| 888.5   | 711     | 0.528701 | -0.653120909 | 0.769538 |
| 2795.5  | 2878    | 0.942102 | -0.137142315 | 0.92334  |
| 275.5   | 272     | 0.900746 | -0.223265459 | 0.909479 |
| 705     | 803     | 0.970231 | -0.078855421 | 0.892904 |
| 242.5   | 293     | 0.945352 | -0.143763808 | 0.827311 |
| 1.5     | 2       | 0.670131 | 1            | 0.774348 |
| 7246    | 7249    | 0.787642 | -0.489673951 | 0.787348 |
| 2120.55 | 2195.98 | 0.741906 | -0.503820237 | 0.712787 |
| 2437    | 2455.5  | 0.786324 | -0.423547831 | 0.780198 |
| 2824    | 2701    | 0.812799 | -0.382373852 | 0.847067 |
| 449.5   | 451.5   | 0.840225 | -0.358906672 | 0.837067 |
| 1888    | 1999.5  | 0.876916 | -0.304270358 | 0.839407 |
| 2379.5  | 2450    | 0.900669 | -0.206614122 | 0.878856 |
| 2442.5  | 2442    | 0.918265 | -0.191084883 | 0.9184   |
| 147.5   | 170.5   | 0.940345 | -0.122422103 | 0.827892 |
| 1280    | 1295.5  | 0.768321 | -0.421061287 | 0.757765 |
| 787.5   | 775.5   | 0.69771  | -0.708246777 | 0.708731 |
| 136     | 140.5   | 0.978769 | -0.037614292 | 0.951515 |
| 1127    | 1303    | 0.942776 | -0.145333464 | 0.850709 |
| 1457.87 | 1494.76 | 0.805875 | -0.518819105 | 0.790182 |
| 1484.5  | 1245    | 0.514558 | -0.76179801  | 0.685093 |
| 1577    | 1579.5  | 0.876855 | -0.299912184 | 0.87583  |
| 521.5   | 850     | 0.723475 | -1.128677987 | 0.462677 |
| 533.5   | 525     | 0.851823 | -0.348538027 | 0.862645 |
| 998.998 | 945.991 | 0.855114 | -0.323198416 | 0.892991 |
| 328     | 322.5   | 0.737215 | -0.441672626 | 0.753052 |
| 774     | 815     | 0.901823 | -0.216811389 | 0.865035 |
| 566.5   | 488     | 0.586766 | -0.624331706 | 0.737644 |
| 454     | 432.5   | 0.784526 | -0.394006587 | 0.826028 |
| 469     | 430.5   | 0.974657 | -0.056460489 | 0.971139 |
| 367     | 393     | 0.990362 | -0.021788407 | 0.944874 |
| 282     | 335     | 0.947245 | -0.097892201 | 0.799295 |
| 909.499 | 810.494 | 0.947854 | 0.078721072  | 0.847932 |
| 526.5   | 523     | 0.868514 | -0.319190532 | 0.872858 |
| 241     | 244.5   | 0.71124  | -0.820132195 | 0.70227  |
| 1175.5  | 1152.5  | 0.740312 | -0.404642957 | 0.760054 |
| 1760.5  | 2313.5  | 0.611962 | -1.340900344 | 0.454336 |
| 366     | 348.499 | 0.782385 | -0.493326476 | 0.817226 |
| 127.5   | 153     | 0.731682 | -0.718229032 | 0.609573 |
| 1366.5  | 1630    | 0.825731 | -0.440421777 | 0.705334 |
| 126     | 158.5   | 0.819461 | -0.438121112 | 0.655117 |
| 8       | 9.5     | 0.664816 | -1.192645078 | 0.568612 |
| 1214.5  | 1014    | 0.895051 | 0.21941963   | 0.792406 |
| 1347.5  | 1413.5  | 0.881392 | -0.234937675 | 0.843422 |
| 165     | 138     | 0.722127 | -0.477578965 | 0.880279 |
| 2153.98 | 2056.04 | 0.762036 | -0.555582353 | 0.794615 |
| 1816    | 1858.5  | 0.858061 | -0.24723255  | 0.8374   |
| 913.5   | 879     | 0.823849 | -0.376854305 | 0.852216 |
| 1228    | 1405    | 0.967379 | -0.085921696 | 0.886611 |
| 7485.5  | 7149.5  | 0.714671 | -0.51164387  | 0.755256 |
| 1418.5  | 1487    | 0.593052 | -1.185904685 | 0.563424 |

|         |         |          |              |          |
|---------|---------|----------|--------------|----------|
| 2510    | 3110.5  | 0.580989 | -1.374608412 | 0.454418 |
| 2289    | 2314    | 0.849252 | -0.354354944 | 0.841845 |
| 253.5   | 235     | 0.92579  | -0.118563197 | 0.994421 |
| 270     | 327.5   | 0.580427 | -0.605140383 | 0.390232 |
| 1919    | 1903.5  | 0.779978 | -0.41729465  | 0.786783 |
| 734     | 911     | 0.877337 | -0.32241956  | 0.735905 |
| 1972    | 1918.5  | 0.719205 | -0.546165912 | 0.741982 |
| 1845.52 | 1552.5  | 0.64614  | -0.512189755 | 0.826973 |
| 362     | 352     | 0.828383 | -0.401813804 | 0.847487 |
| 2109.5  | 2440.5  | 0.995997 | -0.010639645 | 0.910818 |
| 5473.51 | 5630.96 | 0.929536 | -0.182242362 | 0.912551 |
| 1077.5  | 1356    | 0.977882 | -0.059451684 | 0.838022 |
| 352     | 384     | 0.874525 | -0.289506617 | 0.813297 |
| 2249.03 | 2469.47 | 0.832069 | -0.372696846 | 0.762646 |
| 6074.32 | 5801.77 | 0.810208 | -0.421563101 | 0.843061 |
| 834.004 | 861.001 | 0.842201 | -0.322371868 | 0.817347 |
| 7500    | 4649.5  | 0.724459 | -0.545824107 | 0.941293 |
| 620.5   | 790     | 0.537202 | -2.112380473 | 0.415869 |
| 3481.44 | 3419.39 | 0.742228 | -0.584626879 | 0.755313 |
| 1132    | 1169    | 0.889394 | -0.24831827  | 0.86684  |
| 2057    | 1893.5  | 0.74145  | -0.575350906 | 0.801591 |
| 2055    | 1952    | 0.735652 | -0.519596489 | 0.777495 |
| 1378.86 | 1494.5  | 0.823627 | -0.440461987 | 0.769588 |
| 1003.5  | 901.5   | 0.618425 | -0.427793081 | 0.760144 |
| 95      | 120.5   | 0.900574 | -0.275234859 | 0.752394 |
| 1364.5  | 1112.5  | 0.715561 | -0.507266084 | 0.889546 |
| 258.5   | 279.5   | 0.887422 | -0.296344047 | 0.839064 |
| 1406.5  | 1601    | 0.99729  | -0.006682725 | 0.916433 |
| 710     | 669.5   | 0.760105 | -0.478736878 | 0.806886 |
| 489.5   | 538     | 0.96483  | -0.091243998 | 0.908243 |
| 592.586 | 2059.17 | 0.704775 | -2.229381948 | 0.182359 |
| 46      | 93.5    | 0.757486 | -0.908852112 | 0.357161 |
| 40.4107 | 159.83  | 0.937501 | -0.353411859 | 0.30203  |
| 3415.01 | 2892.39 | 0.672237 | -0.487079581 | 0.84167  |
| 616     | 657.5   | 0.809163 | -0.459431619 | 0.763986 |
| 95.5    | 95.5    | 0.754094 | -0.611644543 | 0.754094 |
| 1546    | 1466    | 0.488014 | -0.618476636 | 0.550043 |
| 5011    | 4994    | 0.894183 | -0.270597322 | 0.896264 |
| 1235.5  | 1290    | 0.786271 | -0.378336479 | 0.747395 |
| 2070.99 | 2043.49 | 0.859212 | -0.326106901 | 0.868317 |
| 2948.51 | 3426.77 | 0.908256 | -0.240934707 | 0.813575 |
| 491     | 394     | 0.190237 | -0.959439637 | 0.390698 |
| 232     | 234.5   | 0.769601 | -0.423352767 | 0.760294 |
| 2477    | 2221.5  | 0.972631 | -0.051281463 | 0.946574 |
| 129.5   | 109.5   | 0.938529 | -0.128065039 | 0.949679 |
| 48.5    | 36.5    | 0.816184 | -0.224873411 | 0.867797 |
| 335.999 | 326.999 | 0.611372 | -0.730527907 | 0.634548 |
| 3827.5  | 3815.5  | 0.879213 | -0.281966837 | 0.881322 |
| 189.5   | 206.5   | 0.78043  | -0.516205489 | 0.718771 |
| 1871.5  | 1833.5  | 0.822314 | -0.393739427 | 0.837074 |
| 1178.5  | 1080    | 0.893288 | -0.171379447 | 0.972798 |
| 453.5   | 504     | 0.904768 | -0.241875973 | 0.837254 |
| 337     | 318     | 0.69053  | 0.65460416   | 0.662903 |
| 12006   | 12111.5 | 0.677622 | -0.534224555 | 0.669292 |
| 3334    | 3085.5  | 0.930897 | 0.143823138  | 0.88221  |
| 848     | 938.5   | 0.890507 | -0.276709343 | 0.82493  |

|         |         |          |              |          |
|---------|---------|----------|--------------|----------|
| 942     | 1430    | 0.857098 | -0.392748228 | 0.577888 |
| 262.895 | 241.927 | 0.742607 | -0.49559732  | 0.810743 |
| 1970    | 1804.04 | 0.678952 | -0.562458593 | 0.757976 |
| 1021    | 1018.5  | 0.867489 | -0.266146407 | 0.869388 |
| 363.5   | 322.5   | 0.643642 | -0.563297049 | 0.760585 |
| 775     | 874.5   | 0.791559 | -0.526590138 | 0.70932  |
| 1659.5  | 1699    | 0.999447 | 0.001303444  | 0.985981 |
| 560.5   | 658.5   | 0.914815 | -0.232725107 | 0.816867 |
| 1042.5  | 1242    | 0.923284 | -0.212852197 | 0.818332 |
| 1380.99 | 1314.75 | 0.843287 | -0.359904128 | 0.876851 |
| 3919    | 3891    | 0.773284 | -0.440664626 | 0.779186 |
| 1303    | 1188.5  | 0.743333 | -0.404373973 | 0.832897 |
| 5168.49 | 5086.81 | 0.761304 | -0.523959775 | 0.773148 |
| 1008.99 | 937.002 | 0.844144 | -0.346609748 | 0.895628 |
| 572     | 621.5   | 0.877599 | -0.235058833 | 0.80889  |
| 301     | 271.5   | 0.693667 | -0.589763487 | 0.778801 |
| 26      | 42      | 0.805732 | -0.746243408 | 0.546605 |
| 191     | 214     | 0.730847 | -0.583075391 | 0.642472 |
| 2925.5  | 2948.5  | 0.897853 | -0.23137915  | 0.892484 |
| 141.5   | 231.001 | 0.652257 | 0.818237763  | 0.937306 |
| 1460    | 1535.5  | 0.785055 | -0.481775307 | 0.747814 |
| 199.5   | 193     | 0.532273 | -1.421076416 | 0.552384 |
| 662     | 535     | 0.938247 | -0.128704257 | 0.923013 |
| 451     | 411.5   | 0.806687 | -0.388623451 | 0.877236 |
| 1325    | 1291.49 | 0.892219 | -0.198724187 | 0.913254 |
| 753     | 661.5   | 0.548245 | -0.866508083 | 0.655793 |
| 7366.5  | 7712.5  | 0.910397 | -0.212860199 | 0.880034 |
| 319.5   | 310.5   | 0.973381 | 0.057538409  | 0.954977 |
| 1050.5  | 1130.5  | 0.902775 | -0.227896272 | 0.852855 |
| 10412.5 | 11279.5 | 0.96399  | 0.090682667  | 0.989786 |
| 272     | 300.5   | 0.985296 | -0.03489479  | 0.921021 |
| 0       | 0       | ?        | #DIV/0!      | ?        |
| 29      | 5.5     | 0.735156 | 0.408805546  | 0.287669 |
| 718.124 | 825.456 | 0.525725 | -1.232442096 | 0.433436 |
| 404.5   | 412.5   | 0.933096 | -0.146268296 | 0.919439 |
| 322.5   | 268     | 0.697611 | -0.456638404 | 0.882062 |
| 1419.5  | 1558    | 0.853906 | -0.322055143 | 0.784947 |
| 3774.03 | 3331.48 | 0.854184 | -0.330912578 | 0.937154 |
| 3853    | 3642    | 0.841799 | -0.37382011  | 0.879225 |
| 1409.99 | 1449.52 | 0.887124 | -0.258133449 | 0.868068 |
| 3654.5  | 4315    | 0.804673 | -0.501464435 | 0.692181 |
| 3811.5  | 4520.5  | 0.764624 | -0.72277833  | 0.662469 |
| 487.5   | 417.5   | 0.713389 | -0.639239562 | 0.824489 |
| 957     | 994     | 0.830834 | -0.425628911 | 0.80598  |
| 10401.5 | 9314    | 0.409231 | -0.489830352 | 0.585337 |
| 2075.5  | 2262    | 0.85983  | -0.313178949 | 0.797139 |
| 1466    | 1628    | 0.869241 | -0.350878637 | 0.804081 |
| 9927.5  | 8752    | 0.735623 | -0.60324322  | 0.824293 |
| 1353    | 1527    | 0.930921 | -0.188841904 | 0.859393 |
| 1767.77 | 1562.27 | 0.612815 | -0.601959797 | 0.735219 |
| 1625    | 1573    | 0.756007 | -0.639009118 | 0.776884 |
| 2005    | 2105    | 0.931258 | -0.146417431 | 0.895996 |
| 1025.5  | 1138.5  | 0.918413 | -0.197980755 | 0.849316 |
| 1414.01 | 1427.24 | 0.93243  | -0.152115329 | 0.926139 |
| 188     | 168.5   | 0.823645 | -0.354916507 | 0.90665  |
| 1513    | 1296.5  | 0.795903 | -0.379560891 | 0.920983 |

|         |         |          |              |          |
|---------|---------|----------|--------------|----------|
| 656.5   | 573.5   | 0.736903 | -0.502225672 | 0.847063 |
| 4999.94 | 4776.03 | 0.798302 | -0.369953783 | 0.837257 |
| 1776    | 1969    | 0.900392 | -0.251877277 | 0.834046 |
| 5       | 7       | 0.550362 | -1.321928095 | 0.345015 |
| 954     | 930.5   | 0.742784 | -0.48845452  | 0.763779 |
| 2075.16 | 1910.1  | 0.719563 | -0.548480164 | 0.78702  |
| 204.5   | 258     | 0.937704 | 0.147410207  | 0.910952 |
| 144.5   | 174     | 0.900251 | -0.244188345 | 0.773473 |
| 1158.5  | 1046    | 0.572736 | -1.406552859 | 0.631137 |
| 140     | 71.5    | 0.4751   | -1.703018262 | 0.826322 |
| 3326.74 | 3014.6  | 0.86299  | -0.272716766 | 0.93724  |
| 947.01  | 1204    | 0.96645  | -0.091994894 | 0.821383 |
| 905.5   | 787     | 0.577735 | -0.775446919 | 0.698459 |
| 330.5   | 353     | 0.947956 | -0.13249227  | 0.907799 |
| 705     | 791     | 0.90125  | 0.210061619  | 0.978021 |
| 1468    | 1579    | 0.181826 | -0.935613313 | 0.138566 |
| 373.5   | 368.5   | 0.818093 | -0.31855224  | 0.830081 |
| 1450.02 | 1415.08 | 0.741532 | -0.48471462  | 0.762293 |
| 820.993 | 774.501 | 0.978202 | -0.051862205 | 0.986836 |
| 0       | 0       | ?        | #DIV/0!      | ?        |
| 72.5    | 36      | 0.790298 | -0.398549376 | 0.773061 |
| 8       | 3       | 0.719608 | -0.540568381 | 0.719608 |
| 90.8489 | 84.1256 | 0.596443 | -1.013544045 | 0.649053 |
| 5.5     | 11      | 0.746504 | -1.137503524 | 0.389326 |
| 2.5     | 6.5     | 0.937971 | -0.321928095 | 0.502193 |
| 17.5    | 13      | 0.506369 | 0.728697978  | 0.371992 |
| 6       | 7.5     | 0.928525 | -0.125530882 | 0.722749 |
| 1       | 0       | 0.308068 | -1           | 0.308068 |
| 159     | 404     | 0.553614 | -2.084064265 | 0.138533 |
| 1685.5  | 1624.5  | 0.881305 | -0.248302038 | 0.908258 |
| 2420.5  | 2487    | 0.859448 | -0.312571004 | 0.840018 |
| 273     | 347     | 0.996948 | -0.007943439 | 0.847679 |
| 884     | 752     | 0.608839 | -0.544728576 | 0.784376 |
| 354     | 357     | 0.88744  | -0.210217707 | 0.880485 |
| 319.502 | 317.999 | 0.833321 | -0.359673426 | 0.836795 |
| 4161    | 3777    | 0.723146 | -0.610144726 | 0.794179 |
| 892.88  | 775.623 | 0.741277 | -0.416099995 | 0.874161 |
| 321     | 317.5   | 0.854445 | -0.301289925 | 0.862731 |
| 2120.99 | 2397.97 | 0.802677 | -0.4399586   | 0.710382 |
| 1030    | 1116    | 0.804284 | -0.345760247 | 0.731564 |
| 1334    | 1252.5  | 0.80924  | -0.429529786 | 0.853578 |
| 969     | 908     | 0.728713 | -0.5562182   | 0.779698 |
| 4661    | 4846.5  | 0.781293 | -0.46682107  | 0.751322 |
| 1783.5  | 2068.5  | 0.895956 | -0.287261387 | 0.806067 |
| 1348.5  | 1500    | 0.908788 | -0.217865144 | 0.836929 |

| Log2(Distal vs. Prox) | p-value(Mid vs. Prox) | Log2(Mid vs. Prox) |
|-----------------------|-----------------------|--------------------|
| -0.367266283          | 0.435784              | 0.56584            |
| 1.689980319           | 0.308711              | 3.76672            |
| 0.333030548           | 0.334195              | 1.91636            |
| -1.227805918          | 0.435502              | -1.28371           |
| -0.356296889          | 0.976394              | -0.04964           |
| #DIV/0!               | ?                     | #DIV/0!            |
| -0.32657446           | 0.970862              | -0.02811           |
| -0.545241468          | 0.694275              | -0.63468           |
| -0.217591435          | 0.99765               | -0.00578           |
| -1.280107919          | 0.556                 | -1.23947           |
| -0.263034406          | 0.586334              | -1.58496           |
| 0.080731272           | 0.981961              | 0.04093            |
| -0.54225805           | 0.953322              | -0.09865           |
| -0.858580245          | 0.689441              | 0.13852            |
| -0.576770685          | 0.981057              | -0.02463           |
| -1.132125038          | 0.931193              | -0.102             |
| -0.534776744          | 0.721191              | -0.61073           |
| -0.316027493          | 0.889448              | -0.2303            |
| -1.018046157          | 0.822634              | -0.27456           |
| -0.359746047          | 0.934684              | 0.10409            |
| -0.592458892          | 0.9007                | -0.18406           |
| -0.492952227          | 0.953506              | -0.1023            |
| -0.524233226          | 0.824231              | 0.19461            |
| 1.066769012           | 0.658044              | 0.68753            |
| -0.747143898          | 0.982323              | -0.02537           |
| -0.507251262          | 0.9907                | 0.01416            |
| -0.371098848          | 0.793929              | 0.20549            |
| -0.030860964          | 0.954909              | -0.10145           |
| -0.364053571          | 0.898402              | 0.13845            |
| -0.214411509          | 0.96058               | 0.07879            |
| -0.460352328          | 0.988261              | 0.01813            |
| -0.605901838          | 0.956181              | 0.08738            |
| -0.532529136          | 0.972472              | 0.04967            |
| -0.604821117          | 0.774688              | -0.56431           |
| -2.812292845          | 0.331252              | -3.38576           |
| -0.606756211          | 0.954551              | 0.09121            |
| -0.366078348          | 0.845089              | -0.37473           |
| -0.516373416          | 0.952266              | -0.10534           |
| 0.109209374           | 0.757932              | 0.49994            |
| -2.048759312          | 0.55604               | -1.16331           |
| -1.252607034          | 0.816926              | -0.30705           |
| -0.144389909          | 0.993418              | -0.01265           |
| -0.52971264           | 0.981329              | -0.02918           |
| -0.399607459          | 0.910977              | -0.18398           |
| -1.114419911          | 0.940998              | -0.10529           |
| -0.076940144          | 0.99244               | -0.01724           |
| -0.152003093          | 0.872867              | 0.25206            |
| -0.433004046          | 0.925627              | -0.16236           |
| -0.325638414          | 0.886365              | -0.27694           |
| -0.278981525          | 0.946876              | -0.12472           |
| 0.111434814           | 0.990808              | -0.02224           |
| 0.31567533            | 0.839241              | 0.38271            |
| -0.565678004          | 0.960794              | -0.0832            |
| 0.049221116           | 0.802366              | 0.398              |
| -0.333724522          | 0.97418               | 0.04533            |



|              |          |          |
|--------------|----------|----------|
| -0.445532441 | 0.921454 | -0.1467  |
| -0.581346118 | 0.955916 | -0.074   |
| -0.60348703  | 0.96539  | 0.04443  |
| -0.212485464 | 0.829673 | -0.40637 |
| -0.995554095 | 0.992842 | -0.01118 |
| -1.030982473 | 0.841698 | 0.30961  |
| -0.145850866 | 0.74772  | -0.53051 |
| #DIV/0!      | 0.450185 | #DIV/0!  |
| -0.501081861 | 0.963271 | -0.05454 |
| -0.346023771 | 0.768898 | 0.26651  |
| -0.414626985 | 0.963442 | -0.0716  |
| -1.03495877  | 0.571363 | -0.32363 |
| -0.154086408 | 0.989341 | -0.01981 |
| -0.573761396 | 0.812024 | -0.40644 |
| -1.456453919 | 0.386353 | -1.65378 |
| -0.220292122 | 0.973759 | -0.05396 |
| -0.464668267 | 0.94768  | 0.07602  |
| -0.308174493 | 0.907495 | 0.155    |
| -0.626317008 | 0.915648 | -0.17495 |
| 0.046794211  | 1        | 0        |
| 3.947166553  | 0.582022 | 2.8017   |
| -0.364869461 | 0.998308 | -0.00358 |
| -0.350644087 | 0.956768 | 0.09904  |
| -0.896191004 | 0.875411 | 0.26392  |
| -0.01538069  | 0.901689 | 0.18632  |
| -1.522102477 | 0.826929 | 0.25131  |
| -0.657789509 | 0.930593 | 0.12863  |
| -1           | 1        | 0        |
| -0.255349123 | 0.971825 | 0.05701  |
| 0.289506617  | 0.920936 | 0.152    |
| -0.689578092 | 0.976739 | 0.03358  |
| -0.319309019 | 0.90585  | 0.11404  |
| -0.490141971 | 0.974147 | -0.05437 |
| -0.558739789 | 0.86718  | -0.23508 |
| -0.745427173 | 0.976622 | 0.02804  |
| -0.555460818 | 0.912228 | -0.11664 |
| -0.220175941 | 0.733142 | 0.33639  |
| -0.336421627 | 0.992241 | -0.01351 |
| -0.251474245 | 0.910737 | -0.172   |
| 1.039310339  | 0.975324 | -0.08481 |
| -0.338568248 | 0.957488 | -0.07788 |
| -1.735559687 | 0.840602 | 0.31073  |
| -0.757310096 | 0.920327 | 0.10227  |
| -0.988359223 | 0.93648  | 0.05995  |
| -0.53805558  | 0.889588 | -0.16409 |
| -0.27198387  | 0.863342 | 0.21165  |
| -0.911255749 | 0.867469 | -0.1018  |
| -0.772048053 | 0.98385  | -0.02359 |
| -1.228772781 | 0.751956 | 0.39916  |
| -1.346098077 | 0.865287 | 0.24656  |
| 0.584962501  | 0.764931 | -1       |
| -0.283989612 | 0.989994 | 0.01947  |
| -0.434519379 | 0.945437 | -0.1008  |
| 0.021816266  | 0.952335 | 0.09603  |
| -0.938599455 | 0.385729 | -1.52356 |
| 0.280107919  | 0.847091 | -0.34792 |

|              |          |          |
|--------------|----------|----------|
| -0.740240726 | 0.759886 | 0.37018  |
| -0.234188849 | 0.929105 | -0.14835 |
| -0.69264505  | 0.939397 | -0.09862 |
| -1.121990524 | 0.381745 | 1.16559  |
| -0.427144102 | 0.744694 | 0.22469  |
| -0.569981779 | 0.944524 | -0.0909  |
| -0.673563707 | 0.980369 | 0.02895  |
| -1.423681594 | 0.778913 | -0.20675 |
| 0.923378718  | 0.872256 | 0.33184  |
| -0.69760107  | 0.7878   | 0.108    |
| -1.082346302 | 0.917224 | 0.08855  |
| -0.800551203 | 0.886772 | -0.09945 |
| -0.345831756 | 0.887595 | 0.20915  |
| -0.281784299 | 0.953575 | -0.09048 |
| 0.120512807  | 0.930953 | 0.12553  |
| -0.389946518 | 0.950716 | 0.07677  |
| -0.233126551 | 0.688064 | 0.33197  |
| -0.145932146 | 0.95455  | -0.08254 |
| -0.361238677 | 0.98237  | 0.02104  |
| -0.845998022 | 0.795301 | -0.41337 |
| 0.530514717  | 0.791627 | 0.41504  |
| #DIV/0!      | 0.308068 | #DIV/0!  |
| -0.86763978  | 0.830378 | -0.30788 |
| -0.120558924 | 0.804061 | -0.53119 |
| -1.409235213 | 0.952598 | 0.07169  |
| 0.395554465  | 0.884468 | 0.23256  |
| -0.185265548 | 0.880677 | 0.20645  |
| -0.183288602 | 0.998459 | 0.00288  |
| -1.066912406 | 0.911589 | -0.17008 |
| 0.371448231  | 0.775258 | 0.4695   |
| -1.093109404 | 0.705032 | -0.67807 |
| -1.225231286 | 0.735562 | -0.5408  |
| #DIV/0!      | 1        | #DIV/0!  |
| 0            | 0.667337 | -0.90689 |
| -0.633872101 | 0.859118 | -0.2824  |
| 0.052411353  | 0.989741 | -0.02215 |
| -0.68939344  | 0.915362 | 0.13139  |
| -0.435424782 | 0.966295 | -0.05301 |
| -0.813841282 | 0.917627 | -0.10139 |
| -2.361486043 | 0.247482 | -1.15231 |
| 0            | 0.669515 | 0.73697  |
| -1.180555488 | 0.357472 | -0.79036 |
| -0.88285698  | 0.940747 | 0.0636   |
| -1.04592471  | 0.753354 | -0.18131 |
| #DIV/0!      | ?        | #DIV/0!  |
| -0.467046026 | 0.907498 | -0.17326 |
| -0.106917265 | 0.864422 | -0.33487 |
| -0.543925384 | 0.935966 | -0.09859 |
| -0.500306314 | 0.887564 | 0.14935  |
| -0.573672272 | 0.880349 | 0.18641  |
| -0.490977171 | 0.999315 | -0.00111 |
| -0.593206495 | 0.915334 | 0.10819  |
| -0.417667755 | 0.876614 | 0.19472  |
| -0.39176772  | 0.983    | -0.02792 |
| -0.825896382 | 0.777986 | -0.20931 |
| -0.605072039 | 0.999708 | -0.00037 |

|              |          |          |
|--------------|----------|----------|
| #DIV/0!      | 0.308068 | #DIV/0!  |
| -0.558357781 | 0.884796 | -0.20669 |
| -0.37293325  | 0.884978 | 0.20802  |
| 0.378511623  | 0.879486 | 0.30256  |
| -0.546411134 | 0.990764 | 0.01912  |
| -0.215350873 | 0.98615  | 0.03143  |
| -0.547982392 | 0.258191 | 0.40032  |
| -0.372188082 | 0.862944 | -0.25189 |
| -1.099535674 | 0.944021 | 0.09311  |
| -0.269404835 | 0.982911 | -0.03058 |
| -0.10152146  | 0.992503 | 0.01581  |
| -0.584962501 | 0.876564 | 0.25678  |
| -1.62688395  | 0.669369 | -0.61981 |
| 0.203533394  | 0.748186 | 0.65605  |
| -0.186600247 | 0.98735  | -0.02424 |
| -3.035979297 | 0.709297 | -0.53005 |
| -0.554984253 | 0.886402 | 0.24297  |
| 0.462998538  | 0.942454 | 0.15403  |
| -1.282399731 | 0.487405 | -1.49185 |
| -0.589517904 | 0.920292 | -0.14535 |
| -0.706268797 | 0.64061  | -0.63227 |
| -0.241278522 | 0.965656 | -0.06694 |
| 1.836711176  | 0.795947 | 0.81898  |
| -1.760343929 | 0.647756 | -0.68385 |
| 0.157777528  | 0.924853 | -0.18581 |
| -0.183564905 | 0.950253 | 0.1008   |
| -1.347060705 | 0.82536  | -0.33504 |
| 0.79265876   | 0.802611 | 0.52513  |
| 0.586925619  | 0.772001 | 0.5596   |
| -0.33639705  | 0.800738 | -0.40296 |
| -1.469485283 | 0.877143 | -0.26303 |
| 0.643686844  | 0.797847 | 0.55183  |
| -0.456378295 | 0.918201 | -0.18734 |
| 0.478394     | 0.925708 | 0.1954   |
| -0.099835268 | 0.86899  | -0.34412 |
| -1.097092927 | 0.969828 | -0.05842 |
| -0.202389397 | 0.954301 | 0.09027  |
| -1.371831389 | 0.663401 | -0.7129  |
| 0.071101067  | 0.856952 | 0.34565  |
| 2.053535222  | 0.997657 | -0.01414 |
| 2.358453971  | 0.592625 | 1.46279  |
| -0.651008851 | 0.888498 | 0.20765  |
| -0.570315725 | 0.609698 | 0.49381  |
| -0.311039085 | 0.951591 | 0.08859  |
| -0.47434966  | 0.999994 | 1.2E-05  |
| 0.581642142  | 0.746193 | 0.68428  |
| -0.013517242 | 0.958139 | 0.08831  |
| -0.756636981 | 0.417571 | 0.29422  |
| -0.466513717 | 0.847786 | 0.18145  |
| -0.274174963 | 0.929432 | 0.11858  |
| -0.30512274  | 1        | 0        |
| 0.286036811  | 0.95879  | 0.08834  |
| -1.836501268 | 0.806253 | -0.42146 |
| -1.412495305 | 0.468746 | -1.46421 |
| -0.257634115 | 0.994168 | -0.01294 |
| 1.416041812  | 0.810125 | 0.66444  |

|              |          |          |
|--------------|----------|----------|
| -0.725825037 | 0.938432 | 0.1327   |
| -0.370011819 | 0.982436 | -0.03923 |
| -2.146841388 | 0.924016 | -0.04731 |
| -1.593448967 | 0.907061 | -0.20417 |
| -0.508560991 | 0.873268 | -0.23713 |
| -0.294748985 | 0.929221 | -0.13424 |
| -1.412544591 | 0.367864 | -1.8833  |
| -0.592713929 | 0.990285 | -0.00954 |
| 0.004487391  | 0.991572 | 0.01342  |
| -0.965164685 | 0.665072 | -0.38103 |
| -0.91753784  | 0.807474 | 0.37197  |
| -0.717284654 | 0.984398 | -0.0196  |
| -0.054697739 | 0.959262 | 0.08077  |
| -0.664944471 | 0.910059 | 0.10305  |
| -1.444099965 | 0.455762 | -0.98772 |
| -0.39600173  | 0.911839 | -0.20551 |
| -0.205083556 | 0.934903 | -0.1424  |
| -0.909234536 | 0.953468 | 0.07306  |
| -0.923586884 | 0.758644 | -0.56995 |
| 0.046794211  | 0.651802 | 0.79599  |
| -0.485426827 | 0.904671 | 0.16665  |
| -0.358066312 | 0.96781  | 0.06053  |
| -0.334550637 | 0.998419 | 0.00239  |
| -2.01227833  | 0.868934 | -0.12776 |
| -0.407106226 | 0.990377 | 0.01792  |
| #NUM!        | 0.310821 | -3.24793 |
| 0.174968593  | 0.737227 | -0.51045 |
| -0.943416472 | 0.903706 | 0.11103  |
| 0.080170349  | 0.849349 | -0.3744  |
| -0.496296136 | 0.961382 | 0.06267  |
| -0.316768641 | 0.98182  | -0.03884 |
| -0.631113086 | 0.999672 | 0.00044  |
| -0.586671715 | 0.853712 | 0.15301  |
| -0.377149703 | 0.999393 | 0.00097  |
| -0.479300724 | 0.974715 | -0.04453 |
| -0.191555017 | 0.948719 | -0.10897 |
| -0.573025881 | 0.875324 | -0.13707 |
| -1.263077523 | 0.895397 | -0.19173 |
| -0.474072083 | 0.840137 | -0.29333 |
| -1.5632569   | 0.721448 | -0.4665  |
| -0.213864401 | 0.916598 | 0.18823  |
| -0.336338538 | 0.898439 | -0.24578 |
| -0.403753483 | 0.994814 | -0.00956 |
| -0.395758437 | 0.984813 | -0.02447 |
| -0.171210241 | 0.998282 | -0.00325 |
| -0.364244309 | 0.985852 | -0.01747 |
| -0.529846028 | 0.996757 | 0.00701  |
| -0.589994038 | 0.917775 | 0.12028  |
| -1.220551075 | 0.569975 | -0.91416 |
| 0            | 0.860535 | 0.29639  |
| 0            | 0.303056 | 2.22239  |
| -0.601082166 | 0.763568 | 0.42303  |
| -0.623067106 | 0.98292  | -0.02413 |
| -0.676395642 | 0.96927  | -0.05543 |
| -0.196452668 | 0.970513 | -0.05701 |
| -0.551453769 | 0.867098 | 0.19568  |

|              |          |          |
|--------------|----------|----------|
| -0.249752885 | 0.966637 | 0.06977  |
| -0.11810144  | 0.852599 | 0.30629  |
| -4.169925001 | 0.477095 | -1.58496 |
| -0.231697855 | 0.782475 | 0.2899   |
| -0.110575798 | 0.906652 | -0.2158  |
| -0.497745664 | 0.834788 | -0.29603 |
| -0.416039023 | 0.876811 | -0.22022 |
| -0.410358846 | 0.98124  | -0.03524 |
| -0.473166911 | 0.939434 | -0.10513 |
| -0.725752882 | 0.965753 | 0.02971  |
| -0.502027601 | 0.951295 | -0.09156 |
| 0.711410836  | 0.621734 | 0.76099  |
| -0.027595688 | 0.762347 | -0.49572 |
| -0.429499844 | 0.959122 | -0.08715 |
| -0.736965594 | 0.781216 | 0.43296  |
| -2.201633861 | 0.778951 | -0.35364 |
| -0.515920856 | 0.870308 | 0.26931  |
| -2.263034406 | 0.763157 | -0.45568 |
| -0.786596362 | 0.859291 | 0.18916  |
| 0.39111166   | 0.718256 | 0.39913  |
| 0.015266757  | 0.775162 | 0.39961  |
| -0.312843987 | 0.925856 | -0.14801 |
| -0.075920111 | 0.906058 | -0.23058 |
| -0.17542226  | 0.919171 | -0.186   |
| -0.71283144  | 0.995722 | 0.00445  |
| -0.758113001 | 0.940113 | -0.08736 |
| -0.504352875 | 0.98581  | 0.02205  |
| 0.434937057  | 0.859945 | 0.32193  |
| -0.409370976 | 0.885024 | 0.2327   |
| -1.2410081   | 0.944581 | 0.10692  |
| -0.700932914 | 0.889363 | 0.09648  |
| -0.542283724 | 0.855748 | 0.15155  |
| -0.807354922 | 0.608871 | -1.22239 |
| 0            | 0.622002 | -1       |
| -0.640750221 | 0.935301 | -0.11617 |
| -0.140176841 | 0.900509 | 0.16046  |
| -0.464628742 | 0.917631 | 0.10893  |
| -0.857107957 | 0.989166 | -0.01404 |
| 0.179168846  | 0.877382 | 0.25106  |
| -0.21174104  | 0.966469 | 0.04105  |
| -0.236067358 | 0.934976 | -0.12306 |
| 0.460824086  | 0.90765  | 0.18212  |
| -0.107752144 | 0.542485 | 0.47792  |
| -0.588527353 | 0.980052 | 0.02401  |
| -0.726060051 | 0.850198 | -0.15124 |
| -0.350497247 | 0.799204 | 0.37197  |
| 0.298081353  | 0.676926 | 0.74169  |
| -0.511762458 | 0.9463   | 0.06511  |
| -0.312675782 | 0.932863 | 0.09245  |
| 0.127682553  | 0.762828 | 0.38017  |
| -1.16411938  | 0.825976 | -0.31516 |
| 0.259386629  | 0.911636 | 0.14543  |
| 0.341036918  | 0.907342 | 0.15724  |
| -0.526972963 | 0.94257  | -0.10934 |
| -0.522127731 | 0.998315 | -0.00311 |
| -1.209764567 | 0.970415 | 0.05641  |

|              |          |          |
|--------------|----------|----------|
| -0.015151515 | 0.960755 | -0.09742 |
| 1.106915204  | 0.564258 | 0.69188  |
| -0.306625352 | 0.99652  | -0.00685 |
| -0.471305719 | 0.893486 | 0.22307  |
| -1.64943407  | 0.926799 | 0.13828  |
| -0.552541023 | 0.980155 | 0.03028  |
| -0.810119682 | 0.951307 | -0.07397 |
| -0.487863813 | 0.89895  | 0.15292  |
| -0.090166479 | 0.993917 | 0.01399  |
| 0            | 0.88627  | -0.24793 |
| -0.957862834 | 0.980549 | -0.02727 |
| -0.611725615 | 0.933873 | 0.09699  |
| -0.454218279 | 0.939383 | -0.08507 |
| -0.073608727 | 0.982742 | 0.02667  |
| -0.100436846 | 0.890077 | 0.15254  |
| -2.551512307 | 0.407827 | -0.97742 |
| -0.630188904 | 0.99455  | 0.00581  |
| -0.376649786 | 0.911142 | -0.17904 |
| -0.578084054 | 0.879778 | -0.25198 |
| -0.136699688 | 0.899015 | 0.17222  |
| -0.962472884 | 0.871987 | -0.14299 |
| -0.728869525 | 0.963646 | 0.03665  |
| -0.546282033 | 0.887182 | -0.21978 |
| 0.125887323  | 0.753228 | 0.30709  |
| 0.472348342  | 0.81554  | 0.42574  |
| -0.230887353 | 0.950311 | -0.09729 |
| 1            | 0.559404 | 1.58496  |
| -1.511018541 | 0.784797 | -0.40526 |
| -4.002361102 | 0.255717 | -3.97087 |
| -0.788831782 | 0.897781 | -0.18517 |
| -0.713996794 | 0.906163 | -0.11882 |
| -0.399809499 | 0.935463 | 0.09014  |
| -0.933766302 | 0.90766  | -0.12114 |
| -0.641717279 | 0.983627 | -0.03174 |
| -0.280934376 | 0.920899 | -0.15169 |
| -0.218347414 | 0.819533 | 0.22477  |
| 1            | 0.622002 | #NUM!    |
| -0.530406811 | 0.990625 | -0.01146 |
| -2.307783913 | 0.15034  | -1.2059  |
| -0.272388634 | 0.901288 | 0.15175  |
| -0.347468768 | 0.942836 | 0.08732  |
| -0.155119067 | 0.788213 | 0.32193  |
| -0.358906672 | 0.949427 | -0.08986 |
| -0.47072389  | 0.923946 | -0.10309 |
| -0.358006554 | 0.961626 | -0.06241 |
| -0.230868069 | 0.993699 | -0.0096  |
| -0.288894333 | 0.933122 | 0.10174  |
| -0.278163257 | 0.992049 | 0.01361  |
| -0.240164771 | 0.945235 | 0.08666  |
| -0.236769459 | 0.955475 | 0.06839  |
| -0.367038332 | 0.971032 | -0.04894 |
| 0.115266488  | 0.789497 | -0.57976 |
| -0.593514364 | 0.912524 | -0.14583 |
| -0.289096537 | 0.848819 | 0.16692  |
| 0.146768097  | 0.883892 | 0.22563  |
| -0.548893246 | 0.923213 | 0.10561  |

|              |           |          |
|--------------|-----------|----------|
| -0.37820587  | 0.996776  | -0.00613 |
| -0.11321061  | 0.915181  | 0.1235   |
| -0.438923724 | 0.944393  | -0.11651 |
| -0.514573173 | 0.979853  | 0.03171  |
| 0.265461143  | 0.964075  | 0.05714  |
| 0.137503524  | 0.930262  | 0.1375   |
| -0.249027548 | 0.811535  | 0.31487  |
| -0.324645123 | 0.996789  | -0.00654 |
| -0.355369543 | 0.874972  | -0.18303 |
| -0.026537869 | 0.96911   | 0.0695   |
| -0.844175196 | 0.812897  | -0.40867 |
| -0.154405812 | 0.979694  | -0.047   |
| #DIV/0!      | 0.724378  | #DIV/0!  |
| -1.736965594 | 0.416466  | -1.42884 |
| -0.284535475 | 0.927468  | 0.09097  |
| -0.678071905 | 0.651448  | -0.67807 |
| -0.31169633  | 0.998735  | -0.00239 |
| -0.89335744  | 0.839274  | -0.25755 |
| -0.415037499 | 0.984661  | 0.02466  |
| -0.454714355 | 0.964953  | 0.05782  |
| -0.371053178 | 0.969355  | 0.05448  |
| -0.353856315 | 0.95286   | 0.06976  |
| 0.495207848  | 0.94436   | 0.14374  |
| -2.3293839   | 0.717269  | -0.42799 |
| -0.354664881 | 1         | 0        |
| -0.332007301 | 1         | 0        |
| -0.699245928 | 0.0496821 | 0.58814  |
| -0.211504105 | 0.798417  | 0.32193  |
| -0.405614245 | 0.939746  | -0.12459 |
| -1.039178844 | 0.868301  | -0.24215 |
| -0.673221454 | 0.989793  | 0.01404  |
| -1.736965594 | 0.427844  | -1.32193 |
| 0.574694165  | 0.78793   | 0.48981  |
| -0.157625736 | 0.848925  | 0.33199  |
| -1.273903421 | 0.962262  | 0.06436  |
| -0.470300199 | 0.968215  | -0.05734 |
| -2.379139356 | 0.417975  | -1.81175 |
| -0.556393349 | 0.615501  | 0.50589  |
| -0.577359217 | 0.90975   | -0.18413 |
| -0.408524192 | 0.939454  | -0.11195 |
| -0.617228403 | 0.801172  | 0.17587  |
| -0.75038611  | 0.958811  | 0.05024  |
| -0.565512501 | 0.90717   | -0.1599  |
| -0.562354949 | 0.95206   | -0.08129 |
| -0.312137592 | 0.90241   | 0.13857  |
| -2.553927248 | 0.0584615 | -1.59282 |
| -0.323743442 | 0.948672  | -0.10644 |
| -0.295716873 | 0.944494  | -0.10635 |
| 0.166420761  | 0.881394  | 0.21064  |
| 1.389543268  | 0.647515  | 0.98276  |
| -0.091838867 | 0.985539  | 0.02416  |
| -0.040120308 | 0.973745  | -0.04482 |
| 0            | 0.513713  | 1.58496  |
| -0.57421326  | 0.898946  | -0.19794 |
| #DIV/0!      | ?         | #DIV/0!  |
| -1.853487438 | 0.795962  | -0.42902 |

| 0            | 1        | 0        |
|--------------|----------|----------|
| -1.323675757 | 0.660946 | -0.75336 |
| -0.996977818 | 0.997448 | 0.0054   |
| -0.048866529 | 0.817328 | 0.38043  |
| -0.27677102  | 0.845024 | 0.25642  |
| -0.160464672 | 0.763811 | -0.54749 |
| -2.432959407 | 0.385812 | -2.43296 |
| -0.525099932 | 0.902812 | -0.19455 |
| -0.607010732 | 0.951946 | 0.08244  |
| -0.295789733 | 0.9452   | -0.12456 |
| -0.365631573 | 0.903394 | -0.21867 |
| -2.584962501 | 0.691872 | -0.63743 |
| -0.322502378 | 0.896733 | -0.23521 |
| -0.326612174 | 0.99232  | 0.01338  |
| -0.37891729  | 0.874081 | 0.17704  |
| -0.160464672 | 0.963326 | -0.078   |
| -0.45472882  | 0.986403 | 0.02807  |
| -0.426646194 | 0.95413  | -0.07888 |
| -0.498302796 | 0.899257 | -0.21805 |
| -0.36923381  | 0.998449 | -0.00245 |
| -0.541799363 | 0.899416 | -0.22813 |
| -0.415037499 | 0.615517 | 0.58496  |
| -0.61667136  | 0.72824  | -0.4361  |
| -0.837608671 | 0.77083  | 0.36304  |
| -0.314926014 | 0.908502 | -0.20131 |
| -0.308050511 | 0.908601 | -0.18684 |
| -0.387023123 | 0.851698 | 0.30485  |
| -0.169099897 | 0.93117  | -0.16663 |
| 0.710493383  | 0.819187 | 0.44746  |
| -0.263034406 | 0.474021 | 1        |
| -0.447458977 | 0.657488 | -0.96829 |
| -0.920565533 | 0.844773 | 0.21459  |
| -0.396047046 | 0.932123 | 0.09044  |
| 0.181838323  | 0.974819 | -0.05486 |
| -1.128680214 | 0.792576 | -0.44927 |
| -0.342627541 | 0.956708 | 0.08054  |
| -0.21754628  | 0.716782 | 0.3316   |
| 0.412598454  | 0.98773  | 0.02895  |
| 0.220536743  | 0.939779 | -0.15697 |
| -0.529497099 | 0.969661 | -0.0665  |
| -0.376621423 | 0.953367 | 0.07329  |
| -0.321928095 | 0.622002 | -1.32193 |
| -0.847996907 | 0.872783 | 0.13124  |
| -0.909519239 | 0.598031 | -0.85788 |
| -0.830074999 | 0.450185 | -2.41504 |
| -0.398549376 | 0.909534 | -0.21412 |
| -0.725825037 | 0.763181 | 0.50447  |
| -0.33295288  | 0.998776 | 0.00273  |
| -0.631218092 | 0.970283 | -0.06079 |
| -0.192991505 | 0.998763 | 0.00242  |
| -0.423863062 | 0.883418 | 0.25871  |
| -0.132713922 | 0.917948 | 0.17259  |
| -0.408623824 | 0.96453  | 0.05941  |
| -0.845650606 | 0.881579 | -0.22826 |
| 0.857042046  | 0.678038 | 0.90144  |
| -0.337311128 | 0.938398 | -0.12029 |



|              |          |          |
|--------------|----------|----------|
| -0.125530882 | 0.843013 | 0.32193  |
| 0.144389909  | 0.846372 | 0.35411  |
| -2.723860607 | 0.655721 | -0.73155 |
| -0.762715552 | 0.972945 | -0.05393 |
| -1.859822342 | 0.497351 | -1.42489 |
| 1.777607579  | 0.638879 | 1.19265  |
| -0.306268538 | 0.892711 | 0.16096  |
| -0.23537348  | 0.994664 | 0.00902  |
| -0.513697955 | 0.967682 | -0.04826 |
| -0.662003536 | 0.923865 | 0.10746  |
| -1.276840205 | 0.585771 | -1.0624  |
| -0.467488888 | 0.925429 | -0.15764 |
| 0.211314289  | 0.915107 | 0.2068   |
| -0.173331603 | 0.857561 | -0.26849 |
| #DIV/0!      | 0.308068 | #DIV/0!  |
| -0.088009679 | 0.838148 | 0.2343   |
| 1            | 0.562529 | 1        |
| 0.832458271  | 0.638459 | 0.62279  |
| -0.921546305 | 0.737918 | -0.37936 |
| -0.714664028 | 0.889907 | -0.1245  |
| -0.151117733 | 0.890494 | 0.14813  |
| 0.986060809  | 0.469661 | 0.88881  |
| -0.673771768 | 0.743468 | 0.44171  |
| 0.323973021  | 0.917619 | 0.20474  |
| 0.395928676  | 0.947361 | 0.1375   |
| 0.013623284  | 0.985954 | 0.02712  |
| -0.578927204 | 0.971662 | 0.04462  |
| -0.387470068 | 0.950472 | -0.09903 |
| -0.569379783 | 0.950744 | 0.06198  |
| -0.994428793 | 0.817525 | -0.29283 |
| 0.078189063  | 0.924292 | 0.11138  |
| -0.590599444 | 0.952388 | -0.08472 |
| -0.527602799 | 0.977514 | -0.04166 |
| -0.665490436 | 0.965517 | 0.04998  |
| -0.534099638 | 0.909434 | 0.10688  |
| -0.172642733 | 0.966911 | -0.05884 |
| -1.001325939 | 0.868763 | 0.19038  |
| -0.483772058 | 0.982635 | -0.03515 |
| -0.439192111 | 0.980152 | -0.03018 |
| -0.544658093 | 0.949755 | -0.08845 |
| -0.211355459 | 0.948102 | 0.07764  |
| -0.527423053 | 0.963596 | 0.02578  |
| -0.186243785 | 0.880904 | 0.2069   |
| -0.292992253 | 0.991937 | 0.01659  |
| 0.604698719  | 0.665866 | 0.64338  |
| -0.168709727 | 0.98323  | 0.03319  |
| -0.531551508 | 0.941954 | 0.11787  |
| -0.884031725 | 0.846902 | 0.23467  |
| -0.270426199 | 0.924587 | 0.12632  |
| 1.418916459  | 0.737089 | 0.75637  |
| -0.477543194 | 0.96404  | -0.07696 |
| -1.808379927 | 0.699646 | 0.48601  |
| -0.630293871 | 0.989313 | -0.02318 |
| -1.307768488 | 0.576893 | -0.95257 |
| -2.156401557 | 0.862221 | -0.23563 |
| -0.513444647 | 0.931688 | 0.08855  |

|              |          |          |
|--------------|----------|----------|
| -0.319145654 | 0.781711 | 0.34514  |
| -0.515852381 | 0.943928 | -0.08369 |
| -0.187037145 | 0.977071 | 0.03497  |
| -0.337831436 | 0.989801 | -0.01521 |
| 0.150711526  | 0.752392 | 0.4176   |
| -0.907342073 | 0.808254 | 0.24517  |
| -0.362780043 | 0.943724 | 0.0974   |
| 4.357634869  | 0.212257 | 3.84347  |
| -0.369404726 | 0.749127 | 0.2415   |
| -0.975304415 | 0.630328 | 1        |
| -0.691877705 | 0.851859 | -0.16136 |
| #NUM!        | 0.308068 | 1        |
| 0.071258683  | 0.882935 | 0.26607  |
| #DIV/0!      | 0.308068 | #DIV/0!  |
| -0.626541604 | 0.870456 | -0.23061 |
| -2           | 0.630057 | -1       |
| -1.514573173 | 0.637651 | -0.62149 |
| -0.311858678 | 0.846874 | 0.21139  |
| -0.182134059 | 0.967267 | -0.07012 |
| -0.214475808 | 0.892986 | 0.17895  |
| #DIV/0!      | 1        | #DIV/0!  |
| -0.096270582 | 0.981908 | 0.0337   |
| -0.493303253 | 0.929927 | -0.13231 |
| -0.391609004 | 0.995286 | -0.00995 |
| -0.465426798 | 0.911087 | -0.17561 |
| -0.088251175 | 0.837617 | 0.21453  |
| -0.397335498 | 0.509262 | -0.94753 |
| -0.125530882 | 0.990644 | 0.01838  |
| -0.497499659 | 0.801376 | 0.36923  |
| #NUM!        | 0.308068 | #NUM!    |
| -1           | 0.353387 | #NUM!    |
| -2.075843758 | 0.517321 | -1.06767 |
| 2            | 0.647297 | 1.37851  |
| #NUM!        | 1        | 0        |
| 0.263034406  | 0.799525 | 0.48543  |
| -0.637429921 | 0.647107 | -1       |
| -0.497774328 | 0.845918 | -0.306   |
| 1.40297835   | 0.692407 | 0.99347  |
| 0.823240807  | 0.708139 | 0.78101  |
| -0.99801555  | 0.917329 | -0.15941 |
| #DIV/0!      | ?        | #DIV/0!  |
| -0.480269906 | 0.97573  | -0.03836 |
| 0.250543462  | 0.473913 | 0.80023  |
| -0.386193209 | 0.899039 | 0.10274  |
| -0.625612665 | 0.913328 | -0.0818  |
| -0.538999732 | 0.929294 | -0.13932 |
| -0.533337815 | 0.983303 | 0.02326  |
| 0.10694868   | 0.995906 | 0.00838  |
| -0.648776725 | 0.83055  | -0.37497 |
| -0.389259282 | 0.989365 | -0.02296 |
| -0.372391882 | 0.94915  | -0.07925 |
| -0.411183842 | 0.938512 | 0.09471  |
| -0.193696988 | 0.832417 | 0.23156  |
| -0.072695565 | 0.895749 | 0.18686  |
| -0.34484917  | 0.987791 | -0.02581 |
| -0.184592154 | 0.964075 | 0.07074  |

|              |          |          |
|--------------|----------|----------|
| -0.91012897  | 0.74536  | -0.49712 |
| -0.419281615 | 0.941078 | -0.12449 |
| -1.169925001 | 0.775171 | 0.27065  |
| -0.248405568 | 0.972927 | 0.05295  |
| -0.893617726 | 0.744259 | -0.52129 |
| -0.949479883 | 0.856778 | -0.23798 |
| -0.767339243 | 0.820855 | 0.3505   |
| -0.370134275 | 0.951162 | -0.10909 |
| 0.404927472  | 0.92604  | 0.16004  |
| -0.005608151 | 0.906242 | 0.17752  |
| -1.154722595 | 0.822952 | -0.31279 |
| -0.315517695 | 0.912378 | -0.17421 |
| -1.543306068 | 0.756803 | -0.50214 |
| -0.379275605 | 0.911975 | -0.18732 |
| -1.734792451 | 0.67326  | -0.77749 |
| -0.474224893 | 0.9903   | 0.02049  |
| -0.347481074 | 0.940513 | 0.12572  |
| 0            | 1        | 0        |
| -0.50284388  | 0.876161 | -0.24127 |
| -1.297064584 | 0.903109 | -0.19898 |
| -0.078465434 | 0.948827 | -0.12162 |
| 0.263034406  | 0.848517 | 0.31473  |
| -0.353697151 | 0.882593 | -0.25827 |
| -0.122335958 | 0.87306  | 0.26889  |
| -0.210162133 | 0.981325 | 0.03085  |
| -0.718794787 | 0.978899 | 0.0248   |
| -0.888998901 | 0.981703 | 0.02079  |
| -1.130422497 | 0.861569 | -0.28283 |
| -0.350005538 | 0.950598 | 0.09365  |
| -0.341145001 | 0.935519 | 0.12434  |
| -0.451622721 | 0.977406 | -0.05116 |
| -0.61036013  | 0.917888 | -0.10708 |
| -0.599296551 | 0.954716 | 0.07105  |
| -0.217848192 | 0.987207 | 0.02591  |
| 0.549758267  | 0.896003 | 0.26093  |
| 0.182706841  | 0.889466 | 0.22286  |
| -0.560197188 | 0.719183 | -0.59107 |
| 0.432696166  | 0.682859 | 0.70535  |
| -0.05085637  | 0.936323 | 0.14262  |
| -0.867519596 | 0.933727 | -0.11661 |
| -0.824748643 | 0.885568 | -0.21862 |
| -1.314178595 | 0.850525 | -0.28233 |
| -0.169604746 | 0.990496 | 0.02201  |
| -0.315279941 | 0.963204 | 0.07785  |
| -0.367797241 | 0.931547 | -0.14824 |
| -0.231413746 | 0.857113 | 0.28544  |
| -0.988318195 | 0.859502 | -0.18763 |
| -0.333474754 | 0.984743 | -0.03    |
| -0.040442093 | 0.969    | 0.06813  |
| -0.514011704 | 0.872493 | 0.19804  |
| 0.671855142  | 0.827789 | 0.48033  |
| -0.447767658 | 0.995027 | -0.00809 |
| -0.365181293 | 0.973212 | -0.04587 |
| -0.565638133 | 0.862449 | 0.12863  |
| -0.436682493 | 0.773325 | 0.26221  |
| 0.090602549  | 0.872854 | 0.19931  |

|              |          |          |
|--------------|----------|----------|
| #NUM!        | 0.308068 | #NUM!    |
| -0.217016173 | 0.903907 | -0.19045 |
| -0.65481361  | 0.884444 | -0.24166 |
| -0.250352503 | 0.980405 | 0.03285  |
| -0.011484204 | 0.904787 | 0.17394  |
| -0.432838786 | 0.979508 | 0.03751  |
| -0.268967362 | 0.961845 | -0.06527 |
| -0.229994804 | 0.965505 | -0.05893 |
| -0.457426044 | 0.676413 | 0.29306  |
| -0.31686727  | 0.858949 | 0.15634  |
| -0.306396567 | 0.804832 | 0.25529  |
| -0.731939275 | 0.962002 | 0.05199  |
| -0.493814277 | 0.886742 | 0.14861  |
| -0.17826116  | 0.846634 | 0.1741   |
| -0.397560992 | 0.985089 | -0.02413 |
| -0.376563351 | 0.929377 | 0.12146  |
| -0.012200454 | 0.884744 | -0.24433 |
| 0.297904866  | 0.959639 | -0.09576 |
| -0.554200247 | 0.908596 | 0.16439  |
| -0.585726236 | 0.910937 | 0.14343  |
| -0.188171601 | 0.897487 | 0.13893  |
| -0.341678587 | 0.948624 | -0.09326 |
| -0.015820517 | 0.964788 | -0.0809  |
| -0.424800476 | 0.983403 | 0.0251   |
| -0.332472361 | 0.971686 | -0.06008 |
| -0.049469533 | 0.893002 | 0.19684  |
| 0.221204871  | 0.95799  | 0.09887  |
| -0.625279553 | 0.911513 | 0.12724  |
| -1.184337659 | 0.843134 | -0.1585  |
| -0.563318821 | 0.983764 | 0.01726  |
| -0.415180249 | 0.713827 | 0.18728  |
| -0.593090382 | 0.70901  | 0.17715  |
| -0.652477003 | 0.957961 | 0.05201  |
| -0.168025614 | 0.972949 | 0.04448  |
| -1.077702357 | 0.957604 | 0.07628  |
| -0.444717032 | 0.820391 | -0.4509  |
| 0.367357242  | 0.830851 | 0.33662  |
| -0.202868634 | 0.945146 | 0.07612  |
| -0.302641222 | 0.9615   | 0.07714  |
| -0.810446192 | 0.886907 | -0.22404 |
| -0.458779684 | 0.962137 | 0.06516  |
| -0.242894935 | 0.91012  | -0.16331 |
| -0.210534542 | 0.888759 | -0.20771 |
| -0.190741535 | 0.987575 | -0.0242  |
| -0.175743477 | 0.845393 | 0.28597  |
| 0.201956442  | 0.99929  | 0.00159  |
| -0.339206086 | 0.90218  | -0.20645 |
| -0.123806202 | 0.948082 | -0.10072 |
| #DIV/0!      | 0.308068 | #DIV/0!  |
| -2           | 0.116158 | #NUM!    |
| #NUM!        | 1        | 0        |
| -0.428093652 | 0.983436 | 0.02576  |
| -0.157186175 | 0.980777 | -0.04445 |
| -0.732600402 | 0.960873 | -0.0453  |
| 0.00565922   | 0.940035 | 0.08188  |
| 0.169925001  | 0.823154 | -0.41504 |

|              |          |          |
|--------------|----------|----------|
| -0.549666517 | 0.873645 | -0.29321 |
| -0.188885911 | 0.974045 | -0.0532  |
| -0.961525852 | 0.979667 | 0.03734  |
| 0.584962501  | 0.545627 | #NUM!    |
| #NUM!        | 0.622002 | -1       |
| 0.144389909  | 0.877317 | 0.27563  |
| -0.346557761 | 0.966401 | -0.05749 |
| -0.240491837 | 0.979373 | 0.04474  |
| 0            | 0.791627 | 0.41504  |
| #NUM!        | 0.308068 | #NUM!    |
| -3.857980995 | 0.727896 | -0.33442 |
| -0.179772713 | 0.993695 | -0.01    |
| #DIV/0!      | 0.034897 | #DIV/0!  |
| -0.591509588 | 0.902043 | -0.14931 |
| -0.21679182  | 0.936265 | 0.11478  |
| -0.677528619 | 0.806526 | -0.40511 |
| -0.458861045 | 0.912298 | 0.12019  |
| -0.842112168 | 0.673432 | -0.47874 |
| -0.553431584 | 0.930016 | 0.06815  |
| -0.150304806 | 0.945885 | 0.09765  |
| -0.511541431 | 0.868551 | -0.26535 |
| -0.645085456 | 0.752257 | -0.36678 |
| -0.392317423 | 0.896953 | -0.22239 |
| #DIV/0!      | 0.450185 | #DIV/0!  |
| -0.335388783 | 0.977961 | 0.02857  |
| -0.476671824 | 0.925423 | -0.17395 |
| -0.395068162 | 0.907985 | 0.12646  |
| -3.763765654 | 0.690472 | -0.6763  |
| -0.277107483 | 0.893293 | -0.16365 |
| -0.492064263 | 0.780155 | -0.30383 |
| -1           | 0.651448 | -1       |
| -0.457356062 | 0.952245 | 0.06311  |
| -0.769919376 | 0.951615 | 0.06811  |
| -0.419815687 | 0.970274 | -0.05182 |
| -1.485426827 | 0.925659 | -0.10692 |
| -1.601696516 | 0.806332 | -0.2512  |
| -0.219072559 | 0.915873 | -0.17899 |
| -2.23878686  | 0.87645  | -0.23399 |
| -0.754323354 | 0.819833 | -0.41564 |
| 1.584962501  | 0.714152 | 1        |
| -0.12745395  | 0.93503  | 0.11326  |
| -0.211909345 | 0.71192  | 0.34605  |
| -1.752748591 | 0.366896 | -0.58298 |
| -0.136791843 | 0.935531 | -0.12639 |
| 1.415037499  | 0.860525 | 0.41504  |
| -1.186915961 | 0.856843 | 0.3075   |
| -1.541308968 | 0.811684 | 0.38763  |
| -0.345258226 | 0.999047 | 0.00209  |
| -0.475382656 | 0.9271   | -0.16707 |
| -0.582926234 | 0.860016 | -0.33147 |
| 0            | 1        | 0        |
| -0.566298656 | 0.973336 | -0.04175 |
| -0.30750482  | 0.938745 | -0.12921 |
| -0.645743793 | 0.972254 | -0.03916 |
| -0.492458857 | 0.856554 | -0.33926 |
| -1.119380278 | 0.840204 | 0.31552  |

|              |          |          |
|--------------|----------|----------|
| -0.387513963 | 0.959404 | -0.07469 |
| -0.405402622 | 0.912874 | -0.13868 |
| -0.475017096 | 0.963508 | 0.06131  |
| -1.600904045 | 0.828257 | -0.29834 |
| -0.286707284 | 0.885973 | 0.18403  |
| -0.470927178 | 0.966169 | -0.06697 |
| -0.291630525 | 0.84455  | 0.25759  |
| -0.292711631 | 0.917122 | -0.18183 |
| -0.313858665 | 0.828807 | 0.20645  |
| -0.24467522  | 0.464015 | 0.50181  |
| -0.161386154 | 0.999101 | 0.00196  |
| -0.607842725 | 0.95721  | 0.07055  |
| -0.583881425 | 0.999082 | -0.00173 |
| -0.407119906 | 0.905131 | -0.22112 |
| -0.367782871 | 0.839754 | 0.17665  |
| -0.284478658 | 0.961382 | -0.07172 |
| -0.431257852 | 0.974354 | 0.04586  |
| -0.212841792 | 0.976754 | 0.04346  |
| -0.191017248 | 0.975991 | -0.04544 |
| -0.492975234 | 0.941876 | 0.08958  |
| -0.484523618 | 0.975709 | 0.04634  |
| 0.221742119  | 0.918389 | 0.14836  |
| -0.190646735 | 0.998888 | 0.00143  |
| -0.7570163   | 0.887965 | -0.16893 |
| -0.423783171 | 0.989995 | 0.01651  |
| -0.328315375 | 0.928986 | -0.16169 |
| -0.16758762  | 0.990019 | -0.02229 |
| -0.317487737 | 0.962121 | 0.07711  |
| 0.079718731  | 0.385951 | -1.52226 |
| -0.736965594 | 0.805463 | 0.48543  |
| -0.162583026 | 0.861013 | 0.25154  |
| -0.27352678  | 0.737736 | 0.23355  |
| 1.021959253  | 0.734541 | 0.75193  |
| -1.736965594 | 0.71213  | -0.51457 |
| -0.744017958 | 0.775635 | -0.48365 |
| -0.299726676 | 0.95464  | -0.10322 |
| -0.359090695 | 0.922919 | -0.16456 |
| -0.542600875 | 0.865416 | -0.30166 |
| 0.2410081    | 0.749422 | 0.54057  |
| -0.307261112 | 0.989465 | 0.02041  |
| 0.013423626  | 0.946525 | 0.12146  |
| -0.329206848 | 0.915914 | -0.19043 |
| 0.410811419  | 0.704342 | 0.7167   |
| -0.869272964 | 0.793488 | -0.34441 |
| -1.0908627   | 0.714322 | -0.56969 |
| -2.093660046 | 0.527982 | -0.88441 |
| -0.58561109  | 0.961339 | -0.06673 |
| -0.815575429 | 0.896691 | -0.17403 |
| -0.564017666 | 0.93371  | -0.1408  |
| -1.201851058 | 0.675618 | -0.70626 |
| -0.079435014 | 0.990636 | -0.02068 |
| -0.50421256  | 0.763986 | 0.49983  |
| -0.334044704 | 0.972307 | 0.06082  |
| -0.034889822 | 0.985876 | 0.02804  |
| 0            | 0.450185 | #NUM!    |
| -0.973755955 | 0.915675 | -0.05419 |

|              |          |          |
|--------------|----------|----------|
| -0.498711559 | 0.895255 | 0.13301  |
| -1.085397294 | 0.994375 | 0.00202  |
| -0.470409565 | 0.796922 | 0.18665  |
| -0.735554448 | 0.511579 | 0.28619  |
| -0.848294277 | 0.831753 | 0.09156  |
| -0.825659244 | 0.998487 | -0.00069 |
| -0.154766988 | 0.257782 | 0.83406  |
| -0.417105583 | 0.809769 | 0.22049  |
| -0.981587558 | 0.694516 | 0.08875  |
| -0.567477259 | 0.612545 | 0.27305  |
| -0.25026711  | 0.570377 | 0.38671  |
| -0.514068346 | 0.96136  | 0.06586  |
| -1.86507042  | 0.617504 | -0.54314 |
| -0.387165865 | 0.831568 | 0.22427  |
| -0.747086882 | 0.977895 | -0.04079 |
| -0.171962742 | 0.969539 | 0.0584   |
| -1.597645616 | 0.499415 | -1.06126 |
| -0.417558343 | 0.779303 | 0.27047  |
| -0.794616247 | 0.84358  | 0.18556  |
| -1           | 0.651448 | 0.58496  |
| -0.390001328 | 0.946777 | -0.05013 |
| -1.137837211 | 0.398368 | 0.33917  |
| -0.485345885 | 0.981972 | 0.03314  |
| -0.738106106 | 0.958078 | 0.06217  |
| -0.378679176 | 0.904344 | 0.14602  |
| -1.247927513 | 0.860597 | 0.18312  |
| -0.668690207 | 0.803727 | 0.21932  |
| -0.79483774  | 0.828618 | 0.22477  |
| -0.543481605 | 0.671565 | 0.31823  |
| #DIV/0!      | 0.308068 | #DIV/0!  |
| -0.137660817 | 0.980322 | -0.04373 |
| 1.387023123  | 0.853048 | 0.50901  |
| -0.353743332 | 0.965191 | -0.07058 |
| -1.114549539 | 0.87909  | -0.26551 |
| -1.772044024 | 0.817823 | -0.33879 |
| 0.068055596  | 0.956355 | -0.09202 |
| -0.271121283 | 0.895165 | 0.19118  |
| 0.013674937  | 0.954205 | 0.10593  |
| -0.480804078 | 0.948907 | 0.10812  |
| -0.083351896 | 0.890685 | 0.20653  |
| -0.589330743 | 0.982492 | 0.02396  |
| -0.645978275 | 0.979275 | 0.02051  |
| -1.040412134 | 0.827866 | -0.18659 |
| -0.31259023  | 0.958    | -0.06515 |
| 0.072296394  | 0.345791 | 0.79008  |
| -0.308694907 | 0.897273 | -0.22958 |
| -0.387943838 | 0.946307 | -0.10884 |
| -0.233695914 | 0.979318 | -0.04908 |
| -0.993765054 | 0.888434 | -0.23471 |
| -0.46994914  | 0.962915 | -0.0768  |
| -0.802553936 | 0.834041 | 0.35961  |
| -0.354308382 | 0.984533 | -0.0256  |
| -0.494376875 | 0.953256 | -0.09274 |
| -0.402402422 | 0.872447 | 0.15723  |
| -0.398689236 | 0.94029  | -0.13139 |
| -0.410207582 | 0.981746 | -0.03973 |

|              |           |          |
|--------------|-----------|----------|
| -0.500239822 | 0.790066  | 0.24548  |
| -0.491739806 | 0.996538  | 0.0052   |
| -0.808478954 | 0.895693  | -0.17668 |
| -0.333680487 | 0.750579  | 0.27816  |
| 0.037985774  | 0.896642  | 0.22449  |
| -0.819494684 | 0.93742   | -0.08857 |
| -0.39220078  | 0.924606  | -0.14449 |
| 0.584962501  | 0.329316  | 1.32193  |
| -3.169925001 | 0.398521  | -0.58496 |
| 0.584962501  | 0.329316  | 1.32193  |
| -1           | 0.0917211 | #NUM!    |
| -0.070559447 | 0.955836  | 0.09085  |
| 0.319114909  | 0.929474  | 0.1621   |
| -0.476044585 | 0.904171  | 0.12627  |
| -0.26059123  | 0.885259  | 0.1767   |
| -0.665751794 | 0.983179  | -0.02884 |
| -0.181741658 | 0.946435  | 0.06095  |
| 0.056583528  | 0.948744  | -0.11136 |
| -0.556393349 | 0.914252  | 0.17256  |
| -1.605196984 | 0.834398  | -0.28817 |
| -1.375039431 | 0.459572  | -1.28758 |
| -0.352301744 | 0.900532  | -0.23447 |
| -0.355094959 | 0.852174  | 0.29427  |
| -0.068147377 | 0.933939  | 0.11703  |
| -0.801707912 | 0.810166  | 0.36652  |
| 0.847921008  | 0.538117  | 0.81596  |
| 0.17622224   | 0.935671  | 0.12158  |
| -0.391497942 | 0.773844  | -0.51725 |
| 0.107484427  | 0.767654  | 0.40855  |
| -0.948398804 | 0.733311  | -0.58496 |
| -0.331104079 | 0.816813  | 0.30467  |
| -0.690315501 | 0.914267  | -0.12738 |
| -0.783387825 | 0.790642  | -0.4518  |
| -0.555424078 | 0.911523  | -0.17243 |
| -0.777352628 | 0.916329  | -0.15261 |
| -0.391937009 | 0.973714  | 0.04364  |
| -0.230625558 | 0.99528   | 0.00756  |
| -0.19356628  | 0.866391  | -0.2181  |
| -0.64803802  | 0.991207  | -0.01766 |
| -0.078073563 | 0.97929   | -0.04409 |
| -0.508188776 | 0.997734  | -0.0024  |
| -0.291387085 | 0.91522   | 0.13396  |
| -0.517399217 | 0.975722  | -0.04008 |
| -0.862496476 | 0.841336  | -0.27753 |
| -0.457029161 | 0.979455  | 0.04106  |
| -0.319948514 | 0.890758  | -0.23772 |
| 0.28567648   | 0.87607   | 0.28977  |
| -0.263034406 | 0.984136  | 0.02542  |
| -0.767719294 | 0.977491  | -0.03143 |
| -0.691533781 | 0.960673  | -0.05744 |
| -0.021288735 | 0.957164  | 0.09057  |
| -0.360697665 | 0.935058  | 0.1302   |
| -0.074554546 | 0.985319  | 0.03368  |
| -1.3166576   | 0.770961  | 0.50794  |
| -1.476438044 | 0.957514  | 0.08037  |
| -0.255500733 | 0.865246  | 0.2818   |



|              |          |          |
|--------------|----------|----------|
| 0.495731836  | 0.809275 | 0.41504  |
| -0.110220769 | 0.987696 | -0.02283 |
| -2.277090456 | 0.472404 | -0.8098  |
| -0.63370347  | 0.950972 | -0.07488 |
| 1.319329424  | 0.543112 | 0.97446  |
| -0.895937128 | 0.513242 | -0.31931 |
| -0.336545191 | 0.98862  | 0.01389  |
| -0.44215311  | 0.966747 | 0.06176  |
| -0.454276394 | 0.870472 | -0.22687 |
| -0.08246216  | 0.71527  | 0.53051  |
| -1.58221189  | 0.987199 | 0.01915  |
| -0.852281108 | 0.679286 | 0.40609  |
| 0.517058436  | 0.983548 | -0.02509 |
| -0.442084375 | 0.929019 | -0.1445  |
| -0.496331273 | 0.93111  | -0.13724 |
| -0.28845743  | 0.966629 | -0.07557 |
| 0.247544799  | 0.811041 | 0.34153  |
| -0.310826504 | 0.968056 | -0.05367 |
| 0.069332021  | 0.991446 | 0.01765  |
| -0.297733734 | 0.846676 | 0.22868  |
| 0.003003381  | 0.905441 | 0.16615  |
| -0.133885344 | 0.959234 | -0.08184 |
| -0.200111125 | 0.983701 | -0.03455 |
| 0.105415234  | 0.985321 | -0.03692 |
| 0            | 0.97321  | 0.05092  |
| -0.170882013 | 0.796019 | 0.26777  |
| -0.953870829 | 0.861441 | -0.18064 |
| -0.811927652 | 0.9752   | -0.04116 |
| -0.926000861 | 0.564919 | -0.66297 |
| -0.778389951 | 0.958743 | 0.01475  |
| -0.483221534 | 0.934602 | 0.09736  |
| -1.381542951 | 0.773064 | -0.48521 |
| -0.345135486 | 0.912383 | 0.11548  |
| -0.743660247 | 0.966982 | 0.04342  |
| -0.319256085 | 0.809282 | -0.41082 |
| -0.382871973 | 0.806121 | 0.28316  |
| -0.119415167 | 0.9225   | -0.15275 |
| -0.083133638 | 0.954411 | -0.1002  |
| -0.61398208  | 0.969064 | -0.06674 |
| -0.156075344 | 0.993846 | -0.01396 |
| -2.169925001 | 0.58535  | -1.16993 |
| 0.009803534  | 0.674973 | 0.51117  |
| -0.326693043 | 0.973979 | -0.05285 |
| -2.321928095 | 0.377943 | -1.73697 |
| 1.158697746  | 0.475576 | 1.04947  |
| -0.534417059 | 0.858193 | -0.30334 |
| -0.461562073 | 0.953396 | 0.07441  |
| -0.126064344 | 0.973979 | 0.05751  |
| -0.247944814 | 0.884903 | 0.24764  |
| -0.395220473 | 0.990019 | -0.0191  |
| 1.524336142  | 0.712009 | 0.72624  |
| -1.64385619  | 0.710037 | -0.57061 |
| -0.10924869  | 0.949264 | 0.11203  |
| -0.226697692 | 0.863864 | 0.2797   |
| -0.510172404 | 0.981964 | -0.04187 |
| -0.467127582 | 0.912296 | 0.1031   |

|              |           |          |
|--------------|-----------|----------|
| -0.926843129 | 0.840121  | 0.19832  |
| 0.375739874  | 0.753405  | 0.37467  |
| -2.169925001 | 0.0551167 | #NUM!    |
| -1.362570079 | 0.877389  | -0.16993 |
| 0.3925301    | 0.915029  | -0.21645 |
| -0.619395998 | 0.928064  | -0.16415 |
| -1.171611378 | 0.826581  | -0.22085 |
| -0.459157624 | 0.980797  | 0.02763  |
| -0.671800547 | 0.831771  | -0.33628 |
| -0.249359469 | 0.990823  | -0.01976 |
| -0.449070418 | 0.965654  | -0.06781 |
| -0.398135439 | 0.963618  | -0.08053 |
| -0.641816349 | 0.792188  | 0.26753  |
| -0.599037686 | 0.80081   | -0.4481  |
| -0.277582714 | 0.894132  | -0.22212 |
| -0.204013892 | 0.874419  | -0.27898 |
| 1            | 0.806588  | 0.58496  |
| -0.853158612 | 0.739117  | 0.49643  |
| -0.573185333 | 0.849098  | -0.12338 |
| -0.38953201  | 0.971603  | 0.05189  |
| -2.119147265 | 0.869793  | -0.14323 |
| -0.584923596 | 0.864599  | -0.06791 |
| -0.261441148 | 0.954298  | -0.08199 |
| 0            | 0.900221  | 0.24101  |
| -0.398549376 | 0.775326  | 0.2713   |
| 0.021512374  | 0.987696  | 0.03117  |
| 0.018577639  | 0.999573  | 0.00094  |
| 1            | 0.806588  | -1       |
| -0.868210127 | 0.879376  | 0.15451  |
| 0.246677645  | 0.886891  | 0.21749  |
| -0.241526588 | 0.910553  | 0.10447  |
| -0.323245023 | 0.853702  | -0.35488 |
| -1.113253635 | 0.962837  | -0.075   |
| -0.720014709 | 0.930104  | 0.14075  |
| -0.682601065 | 0.731454  | 0.2777   |
| -0.394573397 | 0.887896  | 0.14218  |
| -0.990638018 | 0.871832  | -0.26815 |
| -0.049424645 | 0.921562  | -0.17493 |
| -0.952384726 | 0.861665  | -0.076   |
| -0.47580651  | 0.904697  | -0.22017 |
| -1.068171503 | 0.915863  | -0.16439 |
| -0.174991472 | 0.958348  | -0.07925 |
| 0.106915204  | 0.942559  | 0.10692  |
| -0.850024158 | 0.70113   | -0.15462 |
| -0.231262348 | 0.922437  | -0.14034 |
| -1.68589141  | 0.0149942 | -1.03953 |
| -0.573071477 | 0.934946  | -0.11647 |
| -0.626755511 | 0.97856   | 0.02563  |
| -1.158591911 | 0.509195  | -1.11851 |
| -0.513887131 | 0.992464  | 0.00835  |
| -0.652873766 | 0.937373  | 0.06619  |
| -0.574908836 | 0.785958  | -0.43195 |
| -0.374154845 | 0.999386  | 0.00093  |
| -0.263491027 | 0.760359  | 0.25846  |
| -0.263397851 | 0.867517  | -0.10454 |
| 0.04940224   | 0.993764  | 0.01324  |

|              |          |          |
|--------------|----------|----------|
| #DIV/0!      | ?        | #DIV/0!  |
| -1.807354922 | 0.622002 | -0.80735 |
| -0.248679113 | 0.644124 | -0.97615 |
| -0.604803413 | 0.870381 | -0.27179 |
| -3.414081397 | 0.381438 | -2.19388 |
| 0.508468898  | 0.962463 | 0.0771   |
| -0.143077864 | 0.593    | 0.6512   |
| 0.774321945  | 0.787463 | 0.54777  |
| 0.339705009  | 0.448661 | 1.21021  |
| -0.2164735   | 0.981662 | -0.0385  |
| -1.96048803  | 0.530364 | -1.098   |
| -0.565799617 | 0.946117 | -0.1224  |
| -0.519245529 | 0.958949 | -0.07369 |
| #NUM!        | 0.426067 | -2       |
| -2           | 0.825659 | -0.41504 |
| -1.671550186 | 0.576699 | -1.07179 |
| -0.124737936 | 0.8135   | 0.24248  |
| -0.374025783 | 0.98408  | -0.02772 |
| 0.002608853  | 0.886563 | 0.18134  |
| -0.032623158 | 0.96442  | 0.0691   |
| -0.264456779 | 0.654456 | 0.9363   |
| -0.793480532 | 0.660013 | -0.76453 |
| -0.558324963 | 0.952935 | -0.0709  |
| -0.842398277 | 0.778214 | -0.36809 |
| -0.093109404 | 0.924291 | -0.19265 |
| -0.584341853 | 0.877155 | -0.24429 |
| -0.655206403 | 0.836501 | -0.32727 |
| -0.435280719 | 0.958997 | 0.06796  |
| -1.214399631 | 0.825807 | -0.25072 |
| -2.419538892 | 0.381009 | -1.06904 |
| -0.847996907 | 0.697227 | -0.29956 |
| -2.189824559 | 0.630368 | 0.75269  |
| -4.614709844 | 0.981035 | -0.02975 |
| -0.174725988 | 0.869541 | 0.16437  |
| -0.398902966 | 0.923964 | -0.17305 |
| -0.36546382  | 0.915477 | -0.19349 |
| -0.390734412 | 0.87745  | 0.1985   |
| -0.235013513 | 0.977928 | 0.03515  |
| -0.519650593 | 0.861507 | -0.29462 |
| -0.41330721  | 0.884072 | -0.26903 |
| -0.391970218 | 0.849964 | 0.17697  |
| -0.190081445 | 0.953626 | -0.1038  |
| -0.387947363 | 0.943975 | 0.09793  |
| -0.18492942  | 0.939466 | 0.12482  |
| -0.228627627 | 0.980891 | 0.03592  |
| -0.271772787 | 0.851494 | 0.21753  |
| -0.44730296  | 0.977061 | -0.04107 |
| -0.505401527 | 0.967604 | -0.0538  |
| #DIV/0!      | 0.308068 | #DIV/0!  |
| -0.338671704 | 0.913726 | -0.16899 |
| -0.418829078 | 0.910118 | 0.16751  |
| -0.640582665 | 0.873047 | 0.15823  |
| -0.517622195 | 0.892558 | 0.10108  |
| -0.568914559 | 0.946532 | -0.09218 |
| -1.082387251 | 0.650515 | -0.7547  |
| -0.260434831 | 0.913881 | 0.12456  |

|              |          |          |
|--------------|----------|----------|
| -0.454435798 | 0.993138 | 0.01119  |
| -0.316967235 | 0.98744  | 0.02489  |
| -0.991691646 | 0.852123 | -0.16138 |
| -1.147319388 | 0.724131 | -0.2932  |
| -0.514573173 | 0.985529 | 0.02259  |
| -0.112224949 | 0.961438 | 0.08642  |
| #NUM!        | 1        | 0        |
| -1.161797121 | 0.929999 | -0.13669 |
| -0.968258187 | 0.941619 | 0.08205  |
| -0.218488504 | 0.960647 | -0.08895 |
| -0.251034405 | 0.939133 | -0.1462  |
| -0.401235654 | 0.923539 | 0.12885  |
| 0.100191947  | 0.833003 | 0.24995  |
| -0.907335391 | 0.868288 | 0.27749  |
| -0.102233658 | 0.774826 | 0.25235  |
| -0.818887318 | 0.693161 | -0.69471 |
| 0            | 0.450185 | #NUM!    |
| -0.219631891 | 0.909815 | -0.19972 |
| -0.489808928 | 0.921259 | 0.12753  |
| -1.01974017  | 0.925887 | 0.09663  |
| -0.625090613 | 0.819417 | -0.39479 |
| -1.46132021  | 0.897607 | -0.14941 |
| -0.466312224 | 0.889614 | 0.15915  |
| -0.726031808 | 0.943367 | -0.111   |
| -0.484251638 | 0.840172 | 0.25907  |
| -0.288058619 | 0.925569 | -0.17354 |
| -0.795986108 | 0.861426 | -0.30378 |
| -0.653283517 | 0.923292 | -0.15575 |
| 0.152003093  | 0.804574 | 0.41504  |
| -0.444784843 | 0.979642 | 0.03554  |
| -0.305586672 | 0.974657 | -0.04347 |
| -0.302064039 | 0.910388 | 0.14041  |
| -0.417590942 | 0.876069 | -0.23988 |
| #DIV/0!      | 0.308068 | #DIV/0!  |
| -0.684338664 | 0.804499 | -0.3524  |
| -2.222392421 | 0.82986  | -0.34792 |
| -0.167109986 | 0.747354 | 0.45943  |
| -0.430273251 | 0.999146 | -0.00175 |
| -0.737609511 | 0.827408 | -0.33621 |
| -0.650312265 | 0.869877 | -0.24031 |
| -0.380415212 | 0.952443 | 0.05072  |
| -0.358411789 | 0.940827 | 0.09262  |
| -0.277901522 | 0.699449 | 0.31645  |
| -0.745929444 | 0.960698 | -0.0373  |
| -0.379149112 | 0.923968 | 0.10185  |
| -0.516933233 | 0.906565 | 0.12251  |
| 0.321928095  | 0.95759  | 0.07039  |
| -0.936940119 | 0.659114 | 0.19074  |
| -0.533518163 | 0.886803 | -0.25413 |
| -0.44004397  | 0.96938  | 0.03998  |
| -1.484330138 | 0.649217 | 0.51567  |
| -0.70257923  | 0.878149 | -0.21151 |
| 0.197939378  | 0.826179 | 0.19794  |
| #NUM!        | 0.622002 | -1       |
| -0.181482033 | 0.92825  | 0.15047  |
| #DIV/0!      | 0.724378 | #DIV/0!  |

|              |           |          |
|--------------|-----------|----------|
| -0.578344622 | 0.988477  | 0.01976  |
| -0.147460269 | 0.990121  | 0.02033  |
| -0.27977767  | 0.798304  | -0.46522 |
| #NUM!        | 0.308068  | #NUM!    |
| -1.321928095 | 0.685038  | 0.48543  |
| -1.050626073 | 0.664564  | -0.77052 |
| -0.512554005 | 0.869518  | -0.1188  |
| -0.319593007 | 0.905516  | 0.18268  |
| -0.18166905  | 0.937157  | 0.12539  |
| -0.558386029 | 0.954868  | 0.04157  |
| -0.316071048 | 0.878528  | 0.14022  |
| -0.732414502 | 0.927965  | -0.11377 |
| 1.184424571  | 0.497298  | 1        |
| -0.589507544 | 0.941666  | 0.07281  |
| -0.714563047 | 0.795718  | 0.20016  |
| -0.46528485  | 0.930299  | 0.11555  |
| -0.205862232 | 0.91335   | -0.17955 |
| 0.109624491  | 0.650949  | 0.4245   |
| -0.246160587 | 0.234819  | 0.37197  |
| 0.188661564  | 0.945466  | -0.1391  |
| -2.236067358 | 0.9504    | -0.06971 |
| 1.321928095  | 0.200976  | 1.58496  |
| -0.122992029 | 0.981102  | 0.0429   |
| -0.84722972  | 0.993876  | -0.00384 |
| -0.294904921 | 0.979812  | 0.03592  |
| -0.552626519 | 0.955649  | -0.09268 |
| -0.425440186 | 0.976358  | 0.03987  |
| -0.646964452 | 0.852588  | 0.13701  |
| -0.337581359 | 0.969501  | 0.06097  |
| -0.584659636 | 0.875622  | 0.11466  |
| -0.415037499 | 0.710482  | 0.45943  |
| 0.333467519  | 0.723122  | 0.58128  |
| 0            | 0.450185  | #NUM!    |
| -0.552541023 | 0.859985  | 0.2258   |
| -0.878344208 | 0.92205   | 0.14003  |
| -0.545888525 | 0.402933  | 0.25334  |
| #DIV/0!      | 0.308068  | #DIV/0!  |
| -0.906044192 | 0.632895  | 0.08121  |
| 0.856044415  | 0.920072  | 0.23133  |
| -0.145229173 | 0.609872  | 0.36846  |
| #NUM!        | 0.308068  | #NUM!    |
| -0.215598519 | 0.972815  | 0.03636  |
| -0.155562821 | 0.983271  | 0.03437  |
| 0.282933963  | 0.990611  | 0.02385  |
| 0.008988783  | 0.991071  | 0.02089  |
| -0.373911001 | 0.94895   | 0.07051  |
| -0.480234524 | 0.915833  | 0.11324  |
| -0.76454597  | 0.988753  | 0.01965  |
| -0.62438164  | 0.819388  | 0.24898  |
| -0.384191658 | 0.967792  | -0.05666 |
| -3.166753545 | 0.0183218 | -1.69237 |
| -0.259093817 | 0.972905  | 0.05476  |
| -0.453424886 | 0.87927   | -0.2112  |
| -0.509493255 | 0.906055  | 0.13669  |
| -0.651279504 | 0.961253  | 0.05452  |
| -0.084757618 | 0.598626  | 0.48481  |

|              |           |          |
|--------------|-----------|----------|
| -0.439584707 | 0.985591  | -0.02168 |
| -0.359199598 | 0.965594  | 0.057    |
| -1.584962501 | 0.0805096 | #NUM!    |
| #NUM!        | 0.438509  | 2        |
| -0.454827602 | 0.982685  | -0.03675 |
| #NUM!        | 0.622002  | -1       |
| 0            | 0.450185  | 1        |
| -0.157541277 | 0.973705  | 0.04891  |
| -0.702940779 | 0.883609  | -0.11437 |
| -0.355520043 | 0.999812  | -0.00032 |
| -0.984282632 | 0.855087  | -0.34163 |
| 0.253118937  | 0.645808  | 0.57836  |
| -0.489449214 | 0.96611   | 0.05903  |
| -0.246054952 | 0.941842  | 0.0881   |
| -1.140622866 | 0.945041  | 0.08046  |
| -0.387516437 | 0.911638  | 0.11548  |
| -0.525311299 | 0.870526  | -0.26831 |
| #DIV/0!      | 0.308068  | #DIV/0!  |
| -0.415037499 | 0.398521  | -2       |
| 0.06195876   | 0.599353  | 0.31953  |
| #DIV/0!      | 0.0917211 | #DIV/0!  |
| 0.069821449  | 0.785512  | 0.33664  |
| -0.661414561 | 0.952975  | -0.09622 |
| 0.201915116  | 0.886532  | 0.22424  |
| -0.698317812 | 0.948087  | -0.08172 |
| -0.408084739 | 0.940769  | -0.1389  |
| 0.067337991  | 0.66333   | 0.51949  |
| -0.115477217 | 0.955734  | -0.11548 |
| -0.22175813  | 0.825371  | 0.17288  |
| -0.518434664 | 0.836829  | 0.1562   |
| -0.469757215 | 0.871829  | 0.14405  |
| 0.065783419  | 0.933866  | 0.13671  |
| -0.854149134 | 0.531963  | -0.60039 |
| -1.274379426 | 0.99545   | 0.00829  |
| -0.301539945 | 0.75741   | 0.27282  |
| 0.358047521  | 0.905667  | 0.15403  |
| -1.308752706 | 0.355765  | -0.61844 |
| -0.289052231 | 0.932604  | 0.10646  |
| #DIV/0!      | ?         | #DIV/0!  |
| -0.041820176 | 0.756486  | 0.51457  |
| -0.628865323 | 0.957136  | 0.05527  |
| -0.281739555 | 0.990259  | 0.01969  |
| -0.592218317 | 0.881665  | 0.15538  |
| -0.336298387 | 0.865639  | 0.22542  |
| -1.036836768 | 0.632106  | -0.59104 |
| -0.65194501  | 0.900531  | -0.15868 |
| 0.031449639  | 0.964615  | 0.07108  |
| -0.021088387 | 0.93055   | 0.11457  |
| -0.190822342 | 0.946818  | -0.09226 |
| -0.369244085 | 0.951677  | 0.09056  |
| -0.694733396 | 0.838824  | -0.29377 |
| -0.534336428 | 0.951645  | -0.10692 |
| -0.19935218  | 0.944287  | 0.09351  |
| -0.369580209 | 0.880738  | -0.22073 |
| -0.408759053 | 0.811953  | 0.24153  |
| -0.795461243 | 0.979948  | 0.01898  |

|              |          |          |
|--------------|----------|----------|
| -0.665845603 | 0.960859 | -0.05574 |
| 0.006484034  | 0.926501 | -0.17236 |
| 0.736965594  | 0.764931 | -0.58496 |
| -0.421763362 | 0.984431 | -0.02368 |
| -0.404926608 | 0.808108 | -0.39962 |
| -0.403547092 | 0.978526 | -0.02493 |
| -0.458307172 | 0.902806 | -0.20638 |
| -0.356485317 | 0.87957  | 0.1491   |
| -0.14405425  | 0.576454 | 0.49347  |
| 0.158262084  | 0.964896 | 0.05135  |
| -0.487824899 | 0.895118 | 0.11778  |
| -0.415890328 | 0.922999 | -0.15519 |
| -0.353294384 | 0.903791 | -0.17475 |
| -0.150609858 | 0.921925 | 0.1226   |
| -0.206773051 | 0.935216 | 0.10497  |
| -0.218534946 | 0.914001 | 0.14329  |
| -0.39521105  | 0.881808 | -0.2691  |
| -0.219554752 | 0.844411 | 0.23768  |
| -0.389205206 | 0.949641 | 0.07893  |
| -0.568842835 | 0.784678 | -0.42045 |
| -0.046716499 | 0.944697 | -0.12168 |
| -0.264477823 | 1        | 0        |
| -0.897175441 | 0.686155 | -0.24598 |
| -1.263552522 | 0.573257 | -0.47768 |
| -0.376148486 | 0.774698 | 0.38215  |
| -0.559337386 | 0.91131  | 0.10817  |
| -0.035300137 | 0.861131 | 0.17699  |
| -0.353636955 | 0.813993 | -0.2909  |
| -0.1438929   | 0.991659 | -0.01066 |
| 0.21818017   | 0.924689 | 0.12676  |
| -0.556016183 | 0.95604  | -0.06623 |
| -0.552541023 | 0.969627 | 0.06413  |
| -0.251538767 | 0.961815 | 0.06108  |
| -0.522168751 | 0.892251 | 0.14689  |
| -0.363697515 | 0.925265 | -0.1149  |
| 0.093822022  | 0.94239  | -0.12501 |
| -0.27836606  | 0.888553 | 0.16415  |
| -0.351889781 | 0.758209 | 0.32773  |
| -0.073316678 | 0.96374  | 0.04689  |
| #DIV/0!      | ?        | #DIV/0!  |
| -1.452111335 | 0.359808 | -0.64897 |
| -0.341238237 | 0.897691 | -0.2146  |
| -0.233199176 | 0.800582 | -0.54253 |
| -1.042228235 | 0.826295 | -0.32251 |
| -0.233672346 | 0.969746 | -0.06904 |
| -0.231325546 | 0.942588 | -0.09668 |
| #DIV/0!      | 0.308068 | #DIV/0!  |
| -0.378509916 | 0.649117 | -0.92514 |
| -0.405932795 | 0.978422 | 0.03181  |
| 1            | 0.663808 | 0.73697  |
| -1.349334252 | 0.984427 | 0.02308  |
| -9.735668118 | 0.182194 | 3.31324  |
| -1.494496691 | 0.885719 | -0.08084 |
| -0.236700258 | 0.878799 | -0.25924 |
| -0.124545098 | 0.983392 | 0.03218  |
| -0.795461243 | 0.359372 | -0.51048 |

|              |            |          |
|--------------|------------|----------|
| -0.509512703 | 0.985811   | -0.01959 |
| -0.148732791 | 0.928582   | 0.15269  |
| #NUM!        | 0.308068   | #NUM!    |
| -2.185866545 | 0.774009   | 0.39428  |
| -1.446104006 | 0.559703   | -0.45626 |
| -1.619139489 | 0.231093   | -0.96508 |
| -0.677096639 | 0.865301   | 0.14213  |
| -1.597562538 | 0.177294   | -0.91475 |
| 0.032421478  | 0.00775244 | 1.42321  |
| 0.736965594  | 0.873517   | 0.41504  |
| -0.179447776 | 0.968571   | 0.04158  |
| 0.169058258  | 0.719824   | 0.46297  |
| -0.584962501 | 0.940877   | -0.12553 |
| 0.334419039  | 0.754229   | 0.33442  |
| -0.492663047 | 0.931999   | -0.11255 |
| 0.048797775  | 0.541896   | 0.48781  |
| 0.024662054  | 0.705961   | 0.56828  |
| 0.556393349  | 0.925659   | 0.08246  |
| 0.152003093  | 0.438509   | -1       |
| -0.252183381 | 0.834642   | -0.3502  |
| -0.084888898 | 0.872839   | -0.25892 |
| 0.373043411  | 0.791213   | 0.37304  |
| -0.195175679 | 0.951781   | 0.08063  |
| -0.298592277 | 0.985008   | 0.02278  |
| 1.086414752  | 0.750862   | 0.67138  |
| -0.430862466 | 0.964608   | -0.07538 |
| -0.192806228 | 0.794346   | 0.25568  |
| -0.55931035  | 0.99902    | -0.00121 |
| -0.524041486 | 0.975607   | 0.03796  |
| -0.202660305 | 0.887399   | 0.12661  |
| -0.830074999 | 0.619199   | -0.67807 |
| -0.329307625 | 0.894865   | 0.17039  |
| -0.734839293 | 0.948796   | 0.09271  |
| #NUM!        | 0.308068   | #NUM!    |
| -0.415037499 | 0.922589   | 0.16993  |
| -1.302028537 | 0.845142   | -0.22039 |
| 1            | 1          | 0        |
| 0.111031312  | 0.958352   | 0.09761  |
| -0.327309432 | 0.991045   | -0.01359 |
| -0.519780757 | 0.852612   | 0.13309  |
| -0.580915668 | 0.906409   | -0.17653 |
| -0.275109504 | 0.994636   | 0.00967  |
| -0.279877916 | 0.870005   | 0.24249  |
| -0.267399598 | 0.982503   | 0.03019  |
| -0.540817903 | 0.861127   | 0.11597  |
| -0.218046951 | 0.973714   | 0.04499  |
| 0            | 0.0662756  | 2.32193  |
| -0.847996907 | 0.55113    | 0.68806  |
| -0.305439108 | 0.937477   | 0.08195  |
| -0.318220465 | 0.917136   | 0.15884  |
| -0.698765734 | 0.90255    | -0.09222 |
| -0.499884076 | 0.975117   | 0.02355  |
| -1.577730931 | 0.595559   | -0.20061 |
| -0.557660777 | 0.994155   | 0.0067   |
| 0.034460915  | 0.986115   | -0.02936 |
| 0.522298466  | 0.897516   | 0.14715  |



|              |           |          |
|--------------|-----------|----------|
| #DIV/0!      | ?         | #DIV/0!  |
| #DIV/0!      | 0.308068  | #DIV/0!  |
| -0.716207034 | 0.904117  | -0.13124 |
| -0.65877374  | 0.874254  | 0.13226  |
| -0.638199675 | 0.943275  | -0.07145 |
| 0.968365591  | 0.73837   | 0.56155  |
| -0.401362562 | 0.633795  | 0.31573  |
| -1           | 0.0805096 | 1.32193  |
| -0.248312958 | 0.977231  | 0.04262  |
| -0.299225044 | 0.893916  | 0.13711  |
| -0.412627786 | 0.967485  | -0.06714 |
| -0.433896527 | 0.962851  | -0.07696 |
| -0.098411423 | 0.757762  | 0.27476  |
| -0.584962501 | 0.685948  | 0.24873  |
| -0.447189692 | 0.986753  | 0.02671  |
| -0.456582391 | 0.926837  | -0.16238 |
| -0.331054981 | 0.954114  | -0.10512 |
| -0.321365531 | 0.946366  | -0.11595 |
| -2.087462841 | 0.777265  | 0.40118  |
| -0.075218178 | 0.99961   | -0.00074 |
| -0.502756706 | 0.992552  | 0.01225  |
| -0.1331342   | 0.940843  | 0.09268  |
| -0.228212095 | 0.803736  | 0.25488  |
| -0.075771897 | 0.895309  | 0.15821  |
| -0.445118839 | 0.79033   | 0.22092  |
| -0.352492413 | 0.901806  | 0.17767  |
| 0            | 0.785812  | 0.58496  |
| -0.778414771 | 0.818404  | -0.33057 |
| -0.300774978 | 0.907564  | 0.12299  |
| -0.508098087 | 0.926181  | -0.13549 |
| #DIV/0!      | 0.329316  | #DIV/0!  |
| -1.041499363 | 0.734689  | -0.42874 |
| -0.67379725  | 0.91742   | -0.15611 |
| 0.002516601  | 0.931425  | 0.12618  |
| -0.443606651 | 0.645367  | 0.4975   |
| 0            | 0.567924  | -1       |
| 0.189884995  | 0.999334  | -0.00147 |
| -1.263034406 | 0.709926  | 0.32193  |
| -0.213718878 | 0.919046  | 0.11826  |
| 0            | 0.90763   | -0.23447 |
| -0.141404961 | 0.875031  | 0.16993  |
| -0.281770968 | 0.976241  | 0.0458   |
| -0.495546411 | 0.637001  | -0.31169 |
| -0.222392421 | 0.462495  | -1.22239 |
| -0.434908209 | 0.981531  | -0.0385  |
| -1.806127619 | 0.102266  | -1.21831 |
| #DIV/0!      | 0.450185  | #DIV/0!  |
| 0.762166148  | 0.568812  | 1.07733  |
| 0.519028231  | 0.761371  | 0.41131  |
| -0.247553419 | 0.894877  | -0.23341 |
| -0.415037499 | 0.523243  | -2       |
| -0.325040707 | 0.934865  | 0.12159  |
| 0.064130337  | 0.661362  | 0.58496  |
| -0.987060944 | 0.573297  | -0.66513 |
| -0.623436649 | 0.635234  | -0.66297 |
| -0.574620556 | 0.606195  | 0.26224  |

|              |          |          |
|--------------|----------|----------|
| -1.925999419 | 1        | 0        |
| -0.132435901 | 0.935501 | 0.11136  |
| -0.434719865 | 0.766247 | 0.25552  |
| -0.930291028 | 0.618753 | -0.23942 |
| -0.638073837 | 0.860752 | -0.30179 |
| -1.114678604 | 0.947799 | -0.08896 |
| 0.05081379   | 0.99856  | -0.00272 |
| -0.444607466 | 0.963642 | 0.04815  |
| -0.356693513 | 0.982021 | -0.03125 |
| -0.748795229 | 0.913773 | -0.08571 |
| -0.689888898 | 0.871257 | -0.21808 |
| -0.608865259 | 0.908729 | -0.12822 |
| -0.25365317  | 0.905926 | 0.16018  |
| -0.459431619 | 0.83517  | -0.28951 |
| 0.026231542  | 0.936701 | -0.15347 |
| -0.573107914 | 0.966675 | 0.07575  |
| -0.523177083 | 0.794215 | -0.27945 |
| #DIV/0!      | ?        | #DIV/0!  |
| 0.091992649  | 0.932329 | 0.11616  |
| -0.279436013 | 0.973717 | -0.04297 |
| -0.392597205 | 0.987824 | 0.02143  |
| -0.297591628 | 0.840231 | 0.15275  |
| -0.254916688 | 0.95612  | -0.08859 |
| -0.002180589 | 0.931208 | 0.08947  |
| 0.902702799  | 0.840212 | 0.38333  |
| -0.187018091 | 0.917421 | -0.16473 |
| -0.207324973 | 0.952925 | -0.08903 |
| -0.287980763 | 0.873858 | -0.27962 |
| -1.425996711 | 0.927847 | -0.10344 |
| -0.812177306 | 0.769716 | -0.488   |
| -0.173482821 | 0.9865   | 0.02815  |
| -0.584962501 | 0.785812 | -0.58496 |
| -0.658367528 | 0.591612 | 0.17649  |
| -0.20849036  | 0.984678 | -0.02761 |
| -1.399103191 | 0.717808 | -0.65988 |
| -0.736965594 | 0.804574 | -0.51457 |
| -0.564263508 | 0.926515 | -0.1585  |
| -0.603071592 | 0.959031 | -0.04323 |
| -0.295209102 | 0.960953 | -0.08111 |
| -0.169925001 | 0.865961 | 0.19841  |
| -0.234338026 | 0.91614  | -0.15513 |
| -0.250514937 | 0.953239 | 0.06154  |
| 0.243115255  | 0.923282 | 0.13916  |
| -0.415037499 | 0.847091 | -0.41504 |
| -0.473931188 | 0.806223 | -0.47393 |
| -0.399344067 | 0.844841 | 0.16758  |
| -0.685010037 | 0.91257  | 0.06554  |
| -0.048767875 | 0.847403 | 0.19692  |
| -0.233162146 | 0.83056  | 0.21468  |
| -0.245175288 | 0.977231 | 0.05325  |
| 0.875780063  | 0.836299 | 0.38405  |
| 0.080170349  | 0.753677 | 0.36257  |
| -0.102569734 | 0.921306 | -0.1913  |
| -1.688055994 | 0.965939 | -0.05063 |
| -0.826999825 | 0.958202 | 0.01391  |
| -1.134003955 | 0.988578 | -0.02485 |

|              |          |          |
|--------------|----------|----------|
| -0.533348197 | 0.918845 | 0.12078  |
| -0.451743701 | 0.949018 | -0.08351 |
| -0.454465366 | 0.605056 | 0.36453  |
| -0.376115569 | 0.952583 | 0.07241  |
| -0.34152202  | 0.934158 | -0.13889 |
| -0.426938313 | 0.999011 | 0.00215  |
| -0.386170438 | 0.915841 | -0.14777 |
| -0.296907302 | 0.967897 | -0.0687  |
| -0.208475762 | 0.978411 | 0.02562  |
| -0.321928095 | 0.986088 | -0.02318 |
| -0.321643866 | 0.844189 | 0.18818  |
| -0.624035738 | 0.943347 | -0.07265 |
| #NUM!        | 0.622002 | -1       |
| -0.362844539 | 0.863029 | -0.32385 |
| -0.069332021 | 0.899694 | -0.2792  |
| 0.379704426  | 0.79494  | 0.35566  |
| -0.683363035 | 0.816022 | 0.20606  |
| -0.423906159 | 0.938423 | 0.08182  |
| -0.430202489 | 0.886994 | -0.2331  |
| -0.064865554 | 0.961572 | -0.07662 |
| -0.321928095 | 0.75577  | 0.26665  |
| -0.212280069 | 0.85039  | 0.22579  |
| -0.624692463 | 0.961156 | 0.06804  |
| -0.229898956 | 0.776975 | 0.32227  |
| -0.03876957  | 0.953507 | 0.08489  |
| #NUM!        | 0.495025 | -1.58496 |
| -0.326293287 | 0.855152 | -0.28854 |
| 0.008309946  | 0.959793 | -0.09077 |
| -0.404008005 | 0.880004 | -0.2434  |
| -0.441363326 | 0.955462 | 0.07996  |
| -0.165644004 | 0.785526 | 0.32664  |
| -0.561766131 | 0.973184 | 0.03624  |
| -0.517607233 | 0.922835 | -0.13443 |
| -0.301023992 | 0.901329 | 0.15871  |
| -0.523440557 | 0.944495 | -0.10025 |
| -0.540985982 | 0.93061  | -0.10476 |
| #DIV/0!      | ?        | #DIV/0!  |
| -0.569000206 | 0.628599 | 0.21942  |
| 0.149867349  | 0.715403 | 0.3673   |
| 0.176558094  | 0.959459 | -0.09622 |
| -0.847996907 | 0.617945 | -1.16993 |
| -0.036525876 | 1        | 0        |
| -0.959358016 | 0.978859 | 0.04064  |
| -1.777607579 | 0.101516 | -2       |
| -0.495479118 | 0.925033 | -0.08599 |
| 0.050626073  | 0.901462 | -0.22239 |
| -0.261712651 | 0.949558 | 0.09962  |
| -0.12367437  | 0.923559 | 0.11768  |
| -0.180572246 | 0.720437 | 0.3388   |
| -0.092029138 | 0.850982 | 0.21775  |
| #DIV/0!      | ?        | #DIV/0!  |
| -0.161036905 | 0.981356 | 0.03839  |
| #DIV/0!      | ?        | #DIV/0!  |
| -0.223276697 | 0.986731 | -0.02677 |
| #NUM!        | 0.622002 | -1       |
| #DIV/0!      | 0.450185 | #DIV/0!  |

|              |          |          |
|--------------|----------|----------|
| -0.260235772 | 0.889726 | -0.21077 |
| -0.353767638 | 0.72105  | 0.26992  |
| -0.627554377 | 0.977625 | 0.03626  |
| -0.171480468 | 0.903737 | -0.24327 |
| -0.367484919 | 0.984265 | 0.02733  |
| -0.490184276 | 0.906372 | 0.09292  |
| 1            | 0.622002 | 1        |
| -0.341036918 | 0.563569 | -0.926   |
| -1           | 0.832892 | -0.2735  |
| -0.496997591 | 0.893803 | -0.18737 |
| -0.613488199 | 0.925264 | 0.07617  |
| -0.30210568  | 0.928535 | -0.16235 |
| -0.584962501 | 0.805714 | 0.41504  |
| 0.720957718  | 0.882129 | 0.2713   |
| 0            | 0.450185 | #NUM!    |
| 0.130060541  | 0.931619 | -0.14296 |
| -0.352408439 | 0.950305 | 0.0736   |
| 0.145850866  | 0.921556 | 0.12724  |
| -0.373814837 | 0.901923 | 0.07635  |
| -0.24081236  | 0.917072 | -0.1544  |
| 0.146329885  | 0.985336 | 0.03136  |
| -0.231607488 | 0.741209 | 0.32646  |
| -0.294156923 | 0.992672 | -0.01326 |
| -0.04186551  | 0.915723 | -0.1707  |
| -0.041579104 | 0.862037 | 0.16262  |
| -0.537483791 | 0.979487 | -0.04172 |
| -0.445625819 | 0.898136 | -0.22323 |
| #DIV/0!      | ?        | #DIV/0!  |
| -0.658701274 | 0.88109  | -0.2295  |
| -0.352085594 | 0.952563 | -0.09446 |
| -0.26720584  | 0.910459 | -0.18979 |
| -1.910339074 | 0.548917 | -1.02181 |
| -4.636624621 | 0.173362 | -3.3147  |
| -1.714842783 | 0.657039 | -0.56598 |
| -2.133473647 | 0.41032  | -0.89308 |
| -1.707819249 | 0.635691 | -0.48543 |
| #NUM!        | 0.308068 | -1       |
| -0.177484556 | 0.934623 | -0.12774 |
| -0.047305715 | 0.895896 | 0.17509  |
| -0.530514717 | 0.779373 | 0.35845  |
| -0.441899452 | 0.614195 | -0.78159 |
| 0.747111481  | 0.969465 | 0.05558  |
| -0.451016796 | 0.927432 | -0.14504 |
| -1.393431043 | 0.870002 | -0.22437 |
| -0.31938827  | 0.933464 | -0.15076 |
| -0.654072586 | 0.855701 | -0.29313 |
| -1.347373111 | 0.942802 | -0.10026 |
| -1.697620301 | 0.751421 | -0.25628 |
| 0.029146346  | 0.976794 | -0.06012 |
| -0.385383764 | 0.898193 | 0.21512  |
| -0.896618288 | 0.545963 | -1.30912 |
| -1.331631947 | 0.88301  | -0.25309 |
| -1.022038663 | 0.963619 | 0.07744  |
| 0.118533174  | 0.902665 | 0.23635  |
| -0.682919596 | 0.948154 | -0.11232 |
| 3.586368337  | 0.901668 | 1.12234  |

|              |           |          |
|--------------|-----------|----------|
| -0.608075571 | 0.919212  | -0.18195 |
| -0.854412969 | 0.721217  | 0.58878  |
| 0.465663572  | 0.577413  | 1.01707  |
| -0.360316378 | 0.881809  | 0.25623  |
| -0.408723725 | 0.894879  | 0.23589  |
| 0            | 0.450185  | #NUM!    |
| -1.400653581 | 0.809556  | 0.38804  |
| -1.993544978 | 0.620853  | -0.40858 |
| -2.058370518 | 0.741933  | 0.49987  |
| -0.725234228 | 0.739841  | 0.39063  |
| -0.270861624 | 0.917302  | 0.13343  |
| -0.473541218 | 0.932686  | -0.12649 |
| -0.805315806 | 0.939915  | 0.10302  |
| -0.094921855 | 0.876791  | 0.2749   |
| -1.492531214 | 0.907013  | 0.05394  |
| -1.339905734 | 0.790169  | 0.39329  |
| -0.80679365  | 0.943258  | -0.10564 |
| 0.406625259  | 0.212549  | 1.48063  |
| -3.42202393  | 0.0356253 | -2.92862 |
| -0.572931126 | 0.648006  | -0.50345 |
| -0.036787843 | 0.930293  | -0.13932 |
| -1           | 0.499897  | -1       |
| -0.403946671 | 0.906653  | -0.19959 |
| -0.14390764  | 0.734306  | -0.54928 |
| #NUM!        | 1         | 0        |
| -0.425763906 | 0.933368  | -0.152   |
| 1.807354922  | 1         | 0        |
| -0.857126    | 0.921723  | 0.0639   |
| -0.788206511 | 0.796729  | 0.24291  |
| -1           | 0.18169   | #NUM!    |
| -0.682293903 | 0.886661  | 0.05813  |
| -0.883303775 | 0.829265  | -0.33121 |
| -0.584962501 | 0.919113  | -0.152   |
| -2.284070951 | 0.608525  | -0.75735 |
| -0.398549376 | 0.836886  | -0.25807 |
| -2.419538892 | 0.944948  | 0.10402  |
| 0.014220601  | 0.947868  | -0.11252 |
| -0.322821115 | 0.934094  | 0.13126  |
| -0.47925339  | 0.588925  | 0.73433  |
| -0.905784658 | 0.750035  | -0.49075 |
| -0.763260683 | 0.971795  | -0.05676 |
| -0.343809151 | 0.995517  | 0.00753  |
| -0.660691573 | 0.991953  | 0.01282  |
| -2.925999419 | 0.538474  | -0.7885  |
| -0.650184947 | 0.9875    | -0.0259  |
| -0.674221952 | 0.9125    | -0.20008 |
| -0.588255074 | 0.920325  | 0.16987  |
| -0.501601136 | 0.962046  | -0.06987 |
| -0.461814205 | 0.932314  | -0.14252 |
| -0.208162985 | 0.886523  | 0.17486  |
| -0.243119569 | 0.949391  | 0.09324  |
| -0.84925197  | 0.972749  | 0.04933  |
| -0.640280478 | 0.953533  | -0.07374 |
| -1.110968096 | 0.928499  | -0.12543 |
| -1.087462841 | 0.766629  | -0.46297 |
| #DIV/0!      | 0.450185  | #DIV/0!  |

|              |          |          |
|--------------|----------|----------|
| -1.325412266 | 0.749915 | -0.3865  |
| -1.415037499 | 0.908899 | -0.09311 |
| -0.313935304 | 0.888032 | -0.23447 |
| -0.131244533 | 0.994971 | 0.00962  |
| 0.414027562  | 0.89508  | 0.23945  |
| 0.289506617  | 0.674351 | 0.73697  |
| -1.447458977 | 0.768134 | -0.38333 |
| -0.534733979 | 0.948128 | -0.09392 |
| -0.351315643 | 0.959943 | -0.07942 |
| 0.126804785  | 0.854731 | -0.32448 |
| 2.362570079  | 0.723842 | 1.36257  |
| -0.563002068 | 0.953815 | -0.06459 |
| -0.319426392 | 0.958067 | 0.04551  |
| #DIV/0!      | ?        | #DIV/0!  |
| -0.712128634 | 0.900901 | -0.09734 |
| 0.637801893  | 0.878956 | 0.27428  |
| -1.537133976 | 0.570061 | -0.91095 |
| -0.147557188 | 0.822002 | -0.33703 |
| -0.259781428 | 0.950573 | 0.10062  |
| -0.085753149 | 0.828405 | 0.22256  |
| -0.193405792 | 0.95303  | -0.08874 |
| -0.35135418  | 0.994359 | 0.01026  |
| -0.322843801 | 0.963549 | 0.05602  |
| 0.20967118   | 0.953807 | -0.10878 |
| -0.489783232 | 0.867203 | 0.18005  |
| -0.451563375 | 0.947788 | -0.08849 |
| -0.511596468 | 0.984142 | -0.03043 |
| -0.279733469 | 0.947726 | -0.11434 |
| -0.152154828 | 0.761276 | 0.52383  |
| -0.183971724 | 0.978628 | -0.04611 |
| -0.088981845 | 0.866584 | 0.20106  |
| -0.415037499 | 0.531526 | -1.67807 |
| -0.330148602 | 0.942155 | -0.10269 |
| -0.836772968 | 0.82661  | 0.25314  |
| -0.474680446 | 0.820716 | -0.29971 |
| -0.214738849 | 0.939297 | -0.11165 |
| -0.114546575 | 0.946649 | 0.0822   |
| -0.227145364 | 0.916614 | 0.12758  |
| -2.95419631  | 0.544269 | -1.04731 |
| 0.683408254  | 0.794321 | -0.76829 |
| -1.975437918 | 0.789843 | -0.31957 |
| -0.376976552 | 0.949478 | -0.10064 |
| -0.13888848  | 0.967679 | 0.06156  |
| -0.569614536 | 0.635291 | -0.60438 |
| -2.459431619 | 0.38665  | -1.87447 |
| -0.486883753 | 0.997223 | 0.00445  |
| -1.334416429 | 0.793885 | 0.42616  |
| -0.56476957  | 0.995415 | 0.00721  |
| -0.644928132 | 0.968193 | -0.06826 |
| -0.417484227 | 0.86107  | -0.30967 |
| -0.44779523  | 0.966033 | 0.05508  |
| -0.877068676 | 0.541986 | 0.67259  |
| 1.127209451  | 0.537956 | 1.15197  |
| -0.037082257 | 0.831494 | 0.21588  |
| 0.022291011  | 0.933517 | 0.1174   |
| -0.525902516 | 0.973541 | -0.05006 |

|              |          |          |
|--------------|----------|----------|
| -0.432304653 | 0.956754 | 0.06198  |
| -0.202123623 | 0.674455 | 0.39612  |
| -0.359866752 | 0.994312 | 0.00879  |
| -1.103003692 | 0.835214 | -0.21675 |
| 0.300866479  | 0.883711 | 0.30087  |
| -0.564994084 | 0.965884 | 0.05426  |
| -0.554548409 | 0.869503 | -0.10465 |
| -0.400614391 | 0.945414 | -0.11277 |
| -0.206728416 | 0.962253 | -0.07828 |
| -0.470282945 | 0.987615 | -0.02308 |
| -0.559427409 | 0.875468 | -0.28379 |
| -0.407221846 | 0.907714 | -0.15795 |
| -0.080170349 | 0.991692 | 0.01616  |
| 0.142957954  | 0.958676 | -0.09311 |
| -0.695688077 | 0.967936 | -0.03618 |
| -0.105089084 | 0.904697 | 0.13736  |
| -0.736965594 | 0.669515 | -0.73697 |
| -0.614108846 | 0.777054 | -0.12029 |
| -0.327328083 | 0.835145 | 0.23262  |
| -0.714018602 | 0.815032 | -0.16932 |
| -0.874469118 | 1        | 0        |
| -1.335420331 | 0.443092 | -0.68422 |
| -0.20528131  | 0.914617 | -0.18066 |
| 0.417406505  | 0.912038 | 0.16146  |
| 0.372912024  | 0.836379 | 0.37291  |
| -0.494764692 | 0.922652 | 0.14074  |
| -0.495456182 | 0.822561 | 0.16744  |
| 1            | 0.622002 | #NUM!    |
| -1           | 0.474021 | 1        |
| -0.618415543 | 0.912162 | 0.11631  |
| 0.158262084  | 0.952202 | 0.0813   |
| -0.502693641 | 0.90213  | -0.18537 |
| -0.324591123 | 0.957695 | -0.08563 |
| -0.158349025 | 0.9853   | -0.03031 |
| -0.361106326 | 0.992575 | -0.01394 |
| -0.526898526 | 0.947312 | -0.07135 |
| 0.524420959  | 0.68736  | 0.60459  |
| -0.657184539 | 0.961547 | -0.03229 |
| -0.420783661 | 0.92463  | -0.14193 |
| 0.30256277   | 0.906802 | 0.20163  |
| 0.547487795  | 0.897067 | 0.26039  |
| 0.268290131  | 0.821994 | 0.38578  |
| -0.371630712 | 0.940106 | -0.12919 |
| 1            | 0.622002 | #NUM!    |
| #DIV/0!      | 0        | #DIV/0!  |
| 0.160464672  | 0.775386 | 0.4073   |
| 0.730579959  | 0.810007 | 0.42975  |
| 0.898687884  | 0.583317 | 1.21794  |
| -0.193197729 | 0.889284 | 0.13469  |
| 0.310046472  | 0.826857 | 0.30637  |
| -0.189071352 | 0.946091 | -0.1127  |
| -0.260617541 | 0.831328 | 0.18463  |
| 0.283665739  | 0.778181 | 0.40968  |
| -0.469894849 | 0.974286 | 0.04369  |
| -0.310787537 | 0.528114 | 0.36091  |
| -3.409390936 | 0.146239 | -1.5025  |

|              |          |          |
|--------------|----------|----------|
| 0.17546015   | 0.878313 | 0.25529  |
| 0.136682698  | 0.773302 | 0.39018  |
| -1.584962501 | 0.825659 | 0.41504  |
| 0.678071905  | 0.377662 | 1.37851  |
| 0.704544116  | 0.840264 | 0.45457  |
| 0.228268988  | 0.876715 | 0.24576  |
| -0.166140443 | 0.923399 | 0.1409   |
| #DIV/0!      | ?        | #DIV/0!  |
| -0.423653779 | 0.924001 | 0.10447  |
| -0.200050268 | 0.986814 | 0.02262  |
| -0.553019608 | 0.978071 | -0.04372 |
| -0.69563327  | 0.848351 | 0.29618  |
| -0.407769499 | 0.920785 | 0.12219  |
| -0.404529841 | 0.968789 | -0.04826 |
| -1.116025823 | 0.417722 | -0.33931 |
| -0.075288127 | 0.987993 | -0.02466 |
| -0.218640286 | 0.666727 | 0.42417  |
| -0.625892765 | 0.936113 | -0.06711 |
| -0.42641955  | 0.925236 | -0.15682 |
| 1.316857105  | 0.89732  | 0.31686  |
| -0.545635447 | 0.877247 | 0.1291   |
| #DIV/0!      | 0.353387 | #DIV/0!  |
| -0.721506376 | 0.920108 | -0.15018 |
| -0.414528702 | 0.953712 | -0.09301 |
| -0.169925001 | 0.446065 | -1.16993 |
| 0.330148602  | 0.444153 | 0.87072  |
| -0.350953116 | 0.954812 | -0.10692 |
| -0.446942206 | 0.331625 | 0.63607  |
| -0.212303604 | 0.954014 | 0.10257  |
| -0.404028108 | 0.973102 | 0.0374   |
| -0.39401597  | 0.902065 | -0.18523 |
| -0.299774953 | 0.954782 | 0.07079  |
| 2.158697746  | 0.451173 | 1.84986  |
| -0.492396382 | 0.932981 | 0.13276  |
| -0.625033812 | 0.877491 | -0.25984 |
| -0.290224947 | 0.987987 | -0.02565 |
| 0.025610644  | 0.470846 | 0.66862  |
| -0.280107919 | 0.872571 | -0.28011 |
| -0.092227292 | 0.938351 | 0.08356  |
| -0.173828957 | 0.792179 | -0.44127 |
| 0.171111916  | 0.844517 | 0.33766  |
| -0.279817258 | 0.372075 | 0.55064  |
| -0.915560328 | 0.855287 | -0.31403 |
| -0.239391562 | 0.890773 | -0.24749 |
| 0.928446739  | 0.856181 | 0.47207  |
| -0.720576634 | 0.959732 | -0.06241 |
| -0.64514102  | 0.987894 | 0.01399  |
| 0.247092862  | 0.902433 | 0.17871  |
| -0.34900233  | 0.743845 | 0.41504  |
| -0.271539125 | 0.863606 | 0.23137  |
| -0.275044424 | 0.999013 | -0.00187 |
| -1.215012891 | 0.503936 | -0.54663 |
| #DIV/0!      | 0.474021 | #DIV/0!  |
| 0.068018423  | 0.85156  | 0.2877   |
| #DIV/0!      | 1        | #DIV/0!  |
| 2            | 0.785812 | -1       |



|              |           |          |
|--------------|-----------|----------|
| -0.736965594 | 0.468351  | -2.32193 |
| -4.673517876 | 0.0714468 | 2.58496  |
| #DIV/0!      | 1         | #DIV/0!  |
| #DIV/0!      | 0.308068  | #DIV/0!  |
| -0.617120214 | 0.663071  | -0.25974 |
| #NUM!        | 0.308068  | #NUM!    |
| -1.311838743 | 0.297955  | -0.90917 |
| -67.46697039 | 0.48479   | -1.64909 |
| -0.606532811 | 0.958859  | -0.07319 |
| -0.941897045 | 0.774194  | 0.30203  |
| -0.762807439 | 0.866362  | -0.24563 |
| -0.735410437 | 0.89768   | -0.12091 |
| -0.234097964 | 0.980712  | -0.0348  |
| -0.025922225 | 0.944244  | 0.10052  |
| -0.052245057 | 0.869747  | -0.29115 |
| -0.275278002 | 0.906098  | -0.15445 |
| -0.541872157 | 0.979111  | -0.02896 |
| -0.326009272 | 0.928903  | -0.13669 |
| -0.590676152 | 0.84818   | -0.28024 |
| -0.540779369 | 0.922617  | -0.13832 |
| -0.687700606 | 0.901212  | -0.17674 |
| -0.400279983 | 0.962787  | -0.0775  |
| -0.346717279 | 0.793366  | 0.20537  |
| -0.628596906 | 0.969839  | 0.04939  |
| -0.40154533  | 0.916936  | -0.14196 |
| -0.431676441 | 0.96953   | -0.05583 |
| 0.393992054  | 0.992131  | 0.01749  |
| -0.522526874 | 0.995336  | -0.00808 |
| -0.404432309 | 0.977723  | 0.04042  |
| -0.269279461 | 0.96156   | -0.07729 |
| -0.393023197 | 0.892528  | -0.24133 |
| -0.030146963 | 0.997077  | 0.00638  |
| -0.54642253  | 0.866268  | -0.25574 |
| -0.846683996 | 0.953157  | -0.09662 |
| 0.209730133  | 0.935334  | 0.13661  |
| -19.55288766 | 0.675472  | -0.56803 |
| -0.206450877 | 0.819022  | 0.41504  |
| -0.704082071 | 0.933894  | -0.12894 |
| -0.485426827 | 0.790729  | 0.30812  |
| #DIV/0!      | 0.450185  | #DIV/0!  |
| #DIV/0!      | ?         | #DIV/0!  |
| -0.144389909 | 0.773792  | -0.69188 |
| -0.550856947 | 0.960603  | 0.07291  |
| -0.651153827 | 0.931928  | 0.07222  |
| -0.558608437 | 0.905812  | 0.12343  |
| -0.628083738 | 0.923495  | 0.09396  |
| -0.672622376 | 0.901507  | 0.10632  |
| -0.622633899 | 0.978915  | 0.02611  |
| -0.315742848 | 0.823397  | 0.23705  |
| -0.389307224 | 0.945305  | -0.08962 |
| -0.078362263 | 0.934205  | 0.15158  |
| 0.433460065  | 0.922399  | 0.19984  |
| -0.428093652 | 0.792742  | 0.21681  |
| -0.268864594 | 0.917568  | -0.15518 |
| -0.072271662 | 0.982729  | 0.03521  |
| 0.321928095  | 0.499897  | 1        |

|              |           |          |
|--------------|-----------|----------|
| 0            | 0.450185  | #NUM!    |
| -0.790076931 | 0.965697  | -0.05311 |
| 0.11189288   | 0.927743  | -0.14684 |
| -0.678071905 | 1         | 0        |
| 1            | 0.65816   | 0.69357  |
| 0.278301162  | 0.976187  | -0.06274 |
| -0.933114188 | 0.831253  | -0.22334 |
| -1.584962501 | 1         | 0        |
| -0.34680364  | 0.929755  | -0.12587 |
| -0.269866668 | 0.947631  | -0.079   |
| -1.584962501 | 0.651448  | -0.58496 |
| -0.795030728 | 0.917641  | -0.10644 |
| -1.273268463 | 0.858035  | -0.25347 |
| -1.881355504 | 0.356716  | -1.32193 |
| -0.191695624 | 0.816842  | -0.33529 |
| -0.989028882 | 0.362203  | -0.31918 |
| 0.268125502  | 0.993537  | 0.01301  |
| -0.387023123 | 0.591021  | 0.55639  |
| -0.052547214 | 0.945131  | 0.09566  |
| #DIV/0!      | ?         | #DIV/0!  |
| -0.252387162 | 0.893959  | 0.17848  |
| -0.547545224 | 0.834392  | 0.27321  |
| -0.332575339 | 0.720062  | -0.33258 |
| -0.124447371 | 0.88732   | -0.19094 |
| 0.014746585  | 0.903169  | 0.15114  |
| #DIV/0!      | ?         | #DIV/0!  |
| #DIV/0!      | 0.0193214 | #DIV/0!  |
| -0.018766457 | 0.984913  | 0.02316  |
| 0.546634382  | 0.823019  | 0.50155  |
| -0.610053482 | 0.914149  | -0.17616 |
| -0.881236084 | 0.726183  | -0.4552  |
| -0.780995273 | 0.748097  | -0.4136  |
| #DIV/0!      | 1         | #DIV/0!  |
| -2.106915204 | 0.533453  | -1       |
| #NUM!        | 0.544016  | -1.32193 |
| -0.552541023 | 0.864848  | -0.22948 |
| -1.413937465 | 0.861985  | -0.29373 |
| -0.065497173 | 0.913456  | 0.13107  |
| -1.304928187 | 0.918165  | -0.14465 |
| -0.158157603 | 0.890194  | 0.18909  |
| -0.174875705 | 0.982229  | 0.03257  |
| -0.424726555 | 0.896824  | -0.23208 |
| -0.433090687 | 0.983315  | -0.02249 |
| 0.354414631  | 0.957271  | 0.10253  |
| -0.315614321 | 0.957238  | -0.078   |
| -0.38054273  | 0.946369  | -0.09219 |
| -0.85035703  | 0.884924  | -0.14119 |
| -0.465591304 | 0.938154  | -0.10316 |
| -0.686306598 | 0.963378  | -0.06144 |
| -0.497461346 | 0.233587  | 0.36467  |
| -0.346263231 | 0.942392  | -0.11442 |
| -0.455464863 | 0.938732  | 0.09379  |
| -0.076257732 | 0.779342  | 0.24084  |
| -0.169127271 | 0.814374  | 0.26551  |
| -0.455739    | 0.956015  | -0.06694 |
| -0.372431479 | 0.930716  | 0.09835  |

|              |          |          |
|--------------|----------|----------|
| -0.35883142  | 0.911965 | -0.21162 |
| -0.489520383 | 0.909755 | -0.19045 |
| -0.603739708 | 0.903652 | -0.19977 |
| -0.522466575 | 0.869654 | 0.17298  |
| -0.649959756 | 0.912134 | 0.13345  |
| -0.510942037 | 0.913091 | -0.13846 |
| -0.40582482  | 0.986222 | 0.02331  |
| -0.493296513 | 0.922702 | -0.12784 |
| -0.34201486  | 0.938985 | 0.0919   |
| -0.898572267 | 0.764085 | -0.47102 |
| -0.753972916 | 0.984653 | -0.01747 |
| -0.039866479 | 0.947493 | 0.08631  |
| -0.445799335 | 0.871969 | -0.19111 |
| -0.362968732 | 0.932318 | -0.12216 |
| 0.367122518  | 0.97829  | 0.05164  |
| -1.709035268 | 0.774295 | -0.38236 |
| 1.843900687  | 0.803835 | 0.8072   |
| -0.009453953 | 0.739571 | 0.35141  |
| -1.752072487 | 0.639874 | -0.67207 |
| -0.259149917 | 0.933792 | -0.1321  |
| -1.175039651 | 0.703038 | 0.52894  |
| 2.145980128  | 0.745288 | 1.06017  |
| 1.567684509  | 1        | 0        |
| -0.411784521 | 0.736892 | 0.53527  |
| -0.359962696 | 0.956471 | 0.08399  |
| -0.412843449 | 0.989047 | -0.02256 |
| -2.064130337 | 0.879081 | -0.25054 |
| -0.852442812 | 0.879464 | 0.22556  |
| -1.683972507 | 0.439834 | -1.41014 |
| -0.663574502 | 0.708562 | 0.61117  |
| -1.062255374 | 0.804456 | -0.36313 |
| -0.785667029 | 0.841457 | 0.34301  |
| -1.187232432 | 0.800419 | -0.40154 |
| 0.081598219  | 0.91959  | -0.19265 |
| -0.489584453 | 0.8681   | 0.21198  |
| 1.087462841  | 0.763415 | -1       |
| -0.575624636 | 0.79177  | -0.47671 |
| -0.183221824 | 0.931345 | -0.13883 |
| #NUM!        | 0.622002 | 1        |
| -0.583112829 | 0.83802  | 0.19879  |
| -0.360363561 | 0.9566   | 0.05614  |
| -0.338841637 | 0.992505 | 0.01558  |
| -0.286555929 | 0.952591 | -0.11046 |
| -0.974182663 | 0.895841 | -0.22061 |
| 0.16196748   | 0.735669 | 0.5217   |
| -0.565534587 | 0.942278 | -0.11335 |
| -0.206547634 | 0.992837 | -0.01644 |
| -0.315621012 | 0.951029 | 0.06955  |
| 1            | 0.83713  | 0.51457  |
| -0.322814855 | 0.967286 | 0.05906  |
| -0.24603425  | 0.940132 | -0.13164 |
| -0.785759774 | 0.88289  | -0.12949 |
| -0.496415202 | 0.904366 | -0.2214  |
| -0.35451031  | 0.850104 | 0.20341  |
| -0.352136042 | 0.948582 | 0.07976  |
| -0.556205478 | 0.989882 | -0.01505 |

|              |          |          |
|--------------|----------|----------|
| -0.327602798 | 0.984331 | -0.025   |
| -0.567838323 | 0.94385  | 0.07551  |
| -0.689773122 | 0.812716 | -0.35211 |
| -0.098118256 | 0.993543 | 0.01536  |
| -1.736965594 | 0.58535  | -0.41504 |
| -0.449995051 | 0.944384 | 0.09127  |
| -0.557902547 | 0.98587  | -0.02304 |
| -1.669851398 | 0.689212 | -0.51457 |
| -0.723771378 | 0.846393 | -0.18256 |
| -0.285916929 | 0.828529 | 0.17117  |
| 0.027324232  | 0.956509 | -0.0946  |
| -0.639318809 | 0.89018  | -0.21032 |
| -0.392971558 | 0.937273 | 0.10953  |
| 0.230389643  | 0.951012 | 0.11072  |
| -0.403588157 | 0.976141 | -0.04868 |
| -0.637044637 | 0.843704 | -0.2001  |
| -0.510220472 | 0.931308 | -0.11679 |
| #DIV/0!      | 1        | #DIV/0!  |
| #DIV/0!      | ?        | #DIV/0!  |
| #DIV/0!      | 0.622002 | #DIV/0!  |
| 0.019279062  | 0.920195 | 0.1591   |
| 0.800185427  | 0.695823 | 0.81578  |
| -0.116873272 | 0.885795 | 0.17233  |
| -0.328054198 | 0.815695 | -0.15472 |
| -0.259249931 | 0.853074 | 0.21813  |
| -0.602022089 | 0.99095  | 0.01326  |
| -0.44990531  | 0.944753 | -0.10104 |
| -0.871885888 | 0.930626 | -0.14533 |
| -0.485426827 | 0.983428 | -0.03389 |
| #DIV/0!      | 0.308068 | #DIV/0!  |
| 0.337034987  | 0.568612 | 0.70627  |
| 0.584962501  | 0.72127  | 0.66985  |
| -0.386701601 | 0.925491 | -0.15817 |
| -0.302393454 | 0.947959 | 0.09594  |
| -1.840219556 | 0.952775 | -0.0756  |
| -0.74377792  | 0.989072 | 0.02091  |
| -0.957785646 | 0.893808 | 0.22876  |
| -1.453226469 | 0.774633 | 0.41899  |
| -0.512884624 | 0.89402  | -0.20333 |
| -0.537147987 | 0.959975 | -0.07345 |
| -0.578979591 | 0.985445 | -0.01644 |
| -0.399292124 | 0.906543 | -0.18418 |
| -0.200964034 | 0.952021 | -0.10177 |
| -0.303118504 | 0.816517 | 0.21818  |
| -0.64018447  | 0.857529 | 0.1554   |
| -0.690442523 | 0.88064  | -0.21617 |
| 0.199762283  | 0.816431 | 0.4091   |
| -0.530514717 | 0.958177 | 0.04521  |
| -0.292318842 | 0.930227 | 0.10799  |
| -0.419839814 | 0.934525 | 0.08332  |
| -0.986861531 | 0.850124 | -0.12286 |
| -0.186474894 | 0.981202 | -0.03867 |
| -0.597901556 | 0.959473 | -0.06222 |
| -0.442709918 | 0.963113 | -0.06733 |
| -0.390895977 | 0.837535 | -0.32651 |
| -0.380272081 | 0.887235 | -0.23713 |

|              |          |          |
|--------------|----------|----------|
| -0.061652883 | 0.991781 | -0.01869 |
| -1.250448442 | 0.958987 | -0.07976 |
| -0.141245925 | 0.792822 | 0.3064   |
| -0.769864381 | 0.767749 | -0.53698 |
| -0.70693964  | 0.904943 | -0.2061  |
| -0.337500899 | 0.984457 | 0.03065  |
| -0.392715397 | 0.915352 | -0.20293 |
| -0.269486803 | 0.989098 | 0.02034  |
| -0.631256153 | 0.985762 | 0.02509  |
| -0.315647781 | 0.945188 | -0.10911 |
| -0.398549376 | 0.776745 | -0.46566 |
| -0.407639806 | 0.960188 | 0.07035  |
| -0.251105323 | 0.902342 | -0.13554 |
| -0.438592919 | 0.990896 | -0.0147  |
| -0.274863171 | 0.970779 | -0.05231 |
| -0.348664477 | 0.968205 | -0.05821 |
| -0.416981833 | 0.943834 | -0.11366 |
| -0.965706822 | 0.949258 | 0.10514  |
| -0.069962558 | 0.918891 | 0.14987  |
| -0.270914929 | 0.960933 | 0.06262  |
| -0.367731785 | 0.974248 | -0.05433 |
| -0.348972918 | 0.995869 | -0.00661 |
| #DIV/0!      | ?        | #DIV/0!  |
| -0.130140135 | 0.88457  | 0.18485  |
| -0.459810571 | 0.923481 | -0.15089 |
| -2.040389124 | 0.591439 | -0.68339 |
| -1.028644787 | 0.89261  | -0.19616 |
| 0.591037015  | 0.785344 | 0.5164   |
| -0.637901467 | 0.903333 | -0.16582 |
| -0.294311601 | 0.988662 | -0.02297 |
| -0.036644395 | 0.878196 | -0.27435 |
| -0.210537835 | 0.991361 | 0.01421  |
| -0.135883428 | 0.928812 | 0.11059  |
| 0.271618252  | 0.511815 | 0.59721  |
| 0            | 1        | 0        |
| -1.670431843 | 0.96652  | 0.04401  |
| -0.733531618 | 0.950487 | 0.03847  |
| -1.449935707 | 0.74372  | -0.45739 |
| -0.394859617 | 0.942598 | -0.12738 |
| -1.138699197 | 0.932118 | -0.11659 |
| -0.498669404 | 0.960329 | -0.08068 |
| -2.544320516 | 0.291967 | -1.60572 |
| -0.336610852 | 0.962723 | -0.07867 |
| 0.074129816  | 0.855786 | 0.24089  |
| -0.155725032 | 0.990245 | -0.01946 |
| -0.589557075 | 0.907539 | -0.14717 |
| -0.263034406 | 0.395629 | -1.32193 |
| 0.019108823  | 0.601822 | -0.29808 |
| -0.281346284 | 0.969868 | 0.05525  |
| 0            | 0.938804 | -0.16993 |
| -0.603883363 | 0.882458 | -0.23788 |
| -0.436734137 | 0.989129 | -0.01768 |
| -0.64654075  | 0.874344 | -0.24921 |
| -0.397533752 | 0.948825 | -0.11236 |
| 3.659509454  | 0.393518 | 3.06413  |
| -0.206450877 | 0.565921 | 0.54707  |

|              |          |          |
|--------------|----------|----------|
| -0.956152781 | 0.978873 | 0.01229  |
| -0.184872138 | 0.784073 | 0.245    |
| -0.848147982 | 0.952642 | -0.0129  |
| -0.799333041 | 0.807721 | -0.20591 |
| -0.259079303 | 0.747473 | 0.27769  |
| -0.340037475 | 0.479337 | 0.24493  |
| -0.079089145 | 0.948411 | 0.10614  |
| -0.53322937  | 0.955456 | -0.07786 |
| -0.331640406 | 0.981379 | -0.04242 |
| -0.543152344 | 0.999873 | 0.00024  |
| -0.82564583  | 0.931534 | 0.11693  |
| -0.147080833 | 0.991134 | 0.02091  |
| -0.634539045 | 0.906134 | -0.21394 |
| -0.31526556  | 0.943994 | -0.1299  |
| -0.199824664 | 0.911557 | -0.16819 |
| -0.851049636 | 0.888443 | -0.10967 |
| -0.357654589 | 0.970082 | -0.06204 |
| -0.513939094 | 0.953898 | -0.08153 |
| -0.576605948 | 0.988044 | 0.02257  |
| -2.98486183  | 0.690235 | -0.38308 |
| -0.330439595 | 0.990867 | -0.01364 |
| 4.070373391  | 0.308068 | 41.9966  |
| -0.508387976 | 0.841124 | -0.29373 |
| -0.304226093 | 0.991347 | -0.01432 |
| -0.307646943 | 0.987107 | 0.02229  |
| -0.392854879 | 0.887087 | -0.23376 |
| -0.896214853 | 0.981495 | -0.03757 |
| -0.168901916 | 0.991364 | 0.0166   |
| -0.282241079 | 0.879361 | 0.13798  |
| -0.416815751 | 0.855919 | 0.16506  |
| -0.559327502 | 0.821573 | 0.13966  |
| -0.208636701 | 0.998484 | 0.0027   |
| -0.574557836 | 0.973481 | 0.03517  |
| 0.205225138  | 0.850065 | 0.23155  |
| -0.194612479 | 0.705343 | 0.33687  |
| -0.594491966 | 0.997673 | 0.00343  |
| -0.359690645 | 0.984787 | -0.02662 |
| -0.606138366 | 0.911187 | 0.14633  |
| -0.296132094 | 0.752015 | -0.5231  |
| -0.438292852 | 0.906317 | 0.14507  |
| -0.482584038 | 0.963393 | -0.07075 |
| -0.216427038 | 0.863573 | 0.20622  |
| -0.607311583 | 0.84188  | -0.28831 |
| -0.355835433 | 0.957831 | -0.07988 |
| -0.267074341 | 0.987064 | 0.02262  |
| -1.311198497 | 0.640134 | -0.74835 |
| -0.362570079 | 0.987478 | 0.02647  |
| -1.722466024 | 0.952307 | -0.0902  |
| -0.680009709 | 0.859179 | -0.30429 |
| -0.974529312 | 0.876313 | -0.21324 |
| -0.678071905 | 1        | 0        |
| -1.777036779 | 0.441939 | -1.23847 |
| -2.594622336 | 0.183414 | -1.43927 |
| -1.554588852 | 0.667201 | -0.6477  |
| -2.605621971 | 0.403313 | -1.47634 |
| -0.220048481 | 0.914825 | -0.19566 |

|              |          |          |
|--------------|----------|----------|
| -0.275634443 | 0.931994 | -0.16601 |
| -0.368387406 | 0.94992  | 0.11704  |
| -4.754887502 | 0.231071 | -3.43296 |
| -1.307054818 | 0.865831 | 0.22132  |
| -1.222392421 | 0.409302 | 0.89308  |
| 0            | 0.450185 | #NUM!    |
| #NUM!        | 0.450185 | -1       |
| -0.934459725 | 0.713835 | 0.55804  |
| -0.445071222 | 0.925757 | -0.16241 |
| -0.963134706 | 0.770117 | -0.50732 |
| -0.278088752 | 0.957775 | 0.08403  |
| -1.458809901 | 0.561687 | -1.05063 |
| -0.419740118 | 0.852779 | 0.15758  |
| -0.906844154 | 0.856308 | -0.23298 |
| -1.570062426 | 0.353884 | -4.15793 |
| -0.292781749 | 0.992382 | 0.01465  |
| -0.172374078 | 0.652129 | 0.59321  |
| -0.199623998 | 0.996091 | -0.00776 |
| -0.684174565 | 0.975675 | -0.03193 |
| -0.838937567 | 0.716527 | -0.24722 |
| -0.427364633 | 0.882826 | 0.14276  |
| -0.59770252  | 0.970177 | -0.04868 |
| -0.103093493 | 0.80934  | 0.42742  |
| -1.002855127 | 0.797612 | -0.13005 |
| -0.546445905 | 0.92594  | 0.08326  |
| -0.093957814 | 0.989187 | 0.01437  |
| -1.289147246 | 0.813004 | -0.33533 |
| 0.152003093  | 0.881953 | -0.36257 |
| -0.575684687 | 0.770654 | -0.43063 |
| -1.736965594 | 0.354904 | -3.32193 |
| -1.321928095 | 0.718566 | -0.67423 |
| 0.090266655  | 0.827152 | 0.25544  |
| -0.183544611 | 0.752378 | 0.35372  |
| -0.275959406 | 0.828111 | 0.22489  |
| -0.592076243 | 0.975946 | 0.0275   |
| -0.53005259  | 0.93497  | 0.09335  |
| 0.041593207  | 0.58711  | 0.42998  |
| -2.172972347 | 0.491655 | -0.81583 |
| -0.636677537 | 0.905478 | -0.20284 |
| -0.740625992 | 0.830157 | 0.21625  |
| -1.885708994 | 0.760741 | -0.26324 |
| -0.820617474 | 0.927549 | -0.10864 |
| -0.683797387 | 0.909817 | -0.16011 |
| -0.445315977 | 0.999701 | -0.00049 |
| -0.589553139 | 0.76235  | -0.51142 |
| -0.627049077 | 0.910642 | -0.18557 |
| -1.304296295 | 0.775881 | -0.23536 |
| -1.431514545 | 0.75793  | 0.23432  |
| -2.013056153 | 0.623012 | 0.4344   |
| -0.665580961 | 0.878476 | -0.18117 |
| #NUM!        | 1        | 0        |
| -0.940768481 | 0.879667 | -0.26141 |
| -0.590164816 | 0.942499 | -0.12519 |
| 1.129829596  | 0.849454 | 0.43523  |
| -0.38042803  | 0.965859 | -0.06649 |
| -0.166461146 | 0.944941 | -0.13566 |

|              |           |          |
|--------------|-----------|----------|
| -0.447940799 | 0.991074  | 0.01693  |
| -0.929515126 | 0.996938  | -0.00603 |
| -0.342263677 | 0.955233  | -0.09162 |
| -0.913362778 | 0.99357   | -0.01346 |
| -0.171752119 | 0.957937  | 0.07971  |
| -0.304854582 | 0.773457  | -0.30485 |
| 0.386587234  | 0.791155  | 0.37968  |
| -0.662965013 | 0.734576  | -0.47534 |
| -0.916403709 | 0.882838  | 0.15608  |
| -0.188171601 | 0.926274  | 0.13107  |
| #DIV/0!      | 1         | #DIV/0!  |
| -1.485426827 | 0.847229  | 0.36257  |
| -0.179978666 | 0.568717  | 0.58496  |
| #DIV/0!      | ?         | #DIV/0!  |
| -0.541414785 | 0.979862  | 0.02308  |
| #DIV/0!      | ?         | #DIV/0!  |
| 0.08246216   | 0.584892  | 0.81943  |
| 0            | 0.613399  | -1.58496 |
| 0.898120386  | 0.563726  | 1.24101  |
| -0.553396579 | 0.47366   | -0.42335 |
| -0.802207029 | 0.861188  | -0.24532 |
| 1.146163184  | 0.478556  | 1.2686   |
| -0.36094382  | 0.934786  | 0.08184  |
| -0.362850201 | 0.94326   | -0.12705 |
| -1.637429921 | 0.920698  | 0.14684  |
| #DIV/0!      | 1         | #DIV/0!  |
| -0.672425342 | 0.896019  | -0.19669 |
| -0.111239208 | 0.93698   | 0.1225   |
| -0.892694106 | 0.980565  | -0.03004 |
| -0.249359469 | 0.734942  | 0.35364  |
| -0.654821524 | 0.819248  | -0.35018 |
| -2.807354922 | 0.795691  | -0.48543 |
| 0.908161133  | 0.97184   | -0.08284 |
| -0.250248512 | 0.95508   | -0.08206 |
| -0.567788179 | 0.947053  | 0.10174  |
| -1.033866425 | 0.989403  | 0.01941  |
| -0.099535674 | 0.996955  | -0.00643 |
| 0.071122591  | 0.943971  | 0.1097   |
| -0.405928675 | 0.920365  | 0.11535  |
| -0.430938329 | 0.981319  | 0.03003  |
| -0.129824407 | 0.867589  | 0.23199  |
| -1.047142983 | 0.962705  | -0.07773 |
| -0.760854344 | 0.709998  | -0.6511  |
| -0.715940091 | 0.876175  | -0.24816 |
| -0.577194279 | 0.817181  | -0.25724 |
| -0.525332786 | 0.998002  | -0.00354 |
| -0.588866955 | 0.917422  | 0.08246  |
| -0.101999714 | 0.968792  | -0.07582 |
| -0.776138043 | 0.88934   | -0.11396 |
| #NUM!        | 0.0405193 | -2.32193 |
| -0.31742004  | 0.890769  | -0.21347 |
| -0.250757307 | 0.91871   | 0.1418   |
| -0.181656367 | 0.867693  | 0.246    |
| #DIV/0!      | 0.308068  | #DIV/0!  |
| -0.640160321 | 0.880028  | -0.21615 |
| -0.225998302 | 0.917464  | 0.15775  |



|              |          |          |
|--------------|----------|----------|
| -0.948511774 | 0.831451 | -0.38845 |
| -0.348730193 | 0.875917 | 0.24804  |
| -0.637683936 | 0.863875 | 0.06854  |
| -0.880977084 | 0.89994  | 0.13136  |
| -0.50810389  | 0.941882 | -0.11504 |
| -0.482869744 | 0.947359 | -0.10508 |
| -0.374023138 | 0.932425 | 0.08525  |
| -0.046439255 | 0.775167 | 0.2444   |
| -1.893084796 | 0.764931 | -0.45251 |
| 0.131244533  | 0.233202 | 1.46566  |
| -1.907270702 | 0.971792 | 0.0581   |
| 0.382469637  | 0.788969 | 0.38247  |
| -0.600787468 | 0.957356 | -0.05889 |
| -2.662965013 | 0.505748 | -0.44057 |
| -0.224431567 | 0.809028 | 0.2671   |
| -0.096290014 | 0.948736 | 0.0821   |
| -0.945625806 | 0.864896 | 0.23405  |
| -0.426367402 | 0.942742 | 0.08487  |
| 0.108934372  | 0.870171 | -0.24616 |
| -0.784503692 | 0.800821 | -0.33354 |
| -0.355936987 | 0.798136 | -0.49476 |
| 0.147713722  | 0.828585 | 0.34341  |
| -1.045540784 | 0.790709 | -0.37749 |
| -1.076066658 | 0.799406 | -0.17757 |
| -1           | 0.710482 | 0.58496  |
| -0.263944911 | 0.935341 | -0.10867 |
| -0.467943118 | 0.915403 | -0.07395 |
| -0.028854863 | 0.697957 | 0.47107  |
| -0.629471605 | 0.824698 | -0.28416 |
| 0            | 1        | 0        |
| -0.839028081 | 0.570589 | -1.11013 |
| 0.982441629  | 0.796605 | 0.53766  |
| -0.11321061  | 0.827817 | 0.32084  |
| -1.24691474  | 0.930809 | -0.13588 |
| #DIV/0!      | ?        | #DIV/0!  |
| -0.479361064 | 0.9294   | 0.07919  |
| -0.415037499 | 0.639437 | 1        |
| -0.036103974 | 0.597503 | 0.41435  |
| -0.46533364  | 0.815755 | 0.33819  |
| -0.565087406 | 0.955371 | 0.05453  |
| -0.180081616 | 0.720966 | 0.61891  |
| -0.381093549 | 0.963268 | 0.08103  |
| -0.60641561  | 0.895024 | 0.11261  |
| -0.376342991 | 0.936777 | -0.13528 |
| -0.206627728 | 0.896654 | 0.16144  |
| -0.103093493 | 0.979093 | 0.03629  |
| -0.463329949 | 0.938878 | -0.11965 |
| -0.283249035 | 0.922074 | -0.16242 |
| -0.402431166 | 0.904514 | -0.20978 |
| -0.28913816  | 0.944908 | -0.09599 |
| -0.329246508 | 0.927572 | 0.11561  |
| -0.553111645 | 0.985533 | 0.02287  |
| -1.843907353 | 0.981876 | 0.03525  |
| 0            | 0.785812 | 0.58496  |
| -2.094887948 | 0.841618 | 0.17288  |
| -0.619727919 | 0.897296 | -0.21972 |

|              |          |          |
|--------------|----------|----------|
| -0.983126181 | 0.910146 | -0.16146 |
| -0.60968493  | 0.883058 | -0.22707 |
| -0.686360721 | 0.809927 | 0.36844  |
| -2.093882744 | 0.814183 | 0.36485  |
| -0.28971347  | 0.894093 | -0.22084 |
| -0.060304188 | 0.917709 | -0.18247 |
| 1.449231868  | 0.91066  | 0.33258  |
| -0.742842161 | 0.849423 | -0.31316 |
| -0.929610672 | 0.956787 | -0.08266 |
| -1.087462841 | 0.943545 | -0.12399 |
| -1.347406023 | 0.801821 | -0.46916 |
| -0.521745595 | 0.944949 | -0.08142 |
| 0.397470983  | 0.930606 | 0.16511  |
| -0.153882159 | 0.965798 | -0.07408 |
| -0.475922607 | 0.959168 | -0.06806 |
| 0.88430731   | 0.877741 | 0.31051  |
| -0.356616755 | 0.959971 | 0.06735  |
| -0.400245472 | 0.94135  | -0.10697 |
| -0.350680925 | 0.992408 | -0.0157  |
| -0.470959759 | 0.96902  | 0.05158  |
| -0.408520555 | 0.946446 | 0.09141  |
| -0.272462678 | 0.951539 | 0.08886  |
| -0.348180147 | 0.935522 | -0.10242 |
| -0.486859849 | 0.944834 | 0.07772  |
| -0.444977987 | 0.979737 | -0.03163 |
| 0.415037499  | 0.430476 | 1.73697  |
| -0.62142839  | 0.717769 | -0.71209 |
| -1.66226446  | 0.603735 | -1.03756 |
| -0.34169135  | 0.783215 | -0.42489 |
| -1.953135531 | 0.515682 | -1.30516 |
| -2.31095234  | 0.43554  | -1.84518 |
| -0.003620316 | 0.808525 | -0.47534 |
| -0.209681184 | 0.973244 | -0.0557  |
| 1.048529894  | 0.974146 | -0.09412 |
| -0.297012876 | 0.888633 | 0.21728  |
| -0.499370315 | 0.77588  | -0.51411 |
| -2.548436625 | 0.82292  | -0.2854  |
| 0.247437551  | 0.952748 | 0.10758  |
| -1.229025514 | 0.804595 | -0.4553  |
| -0.313660479 | 0.881691 | 0.29177  |
| 0.968950077  | 0.699549 | 0.86036  |
| -0.557400993 | 0.844351 | -0.37424 |
| 0.120327475  | 0.971243 | 0.06698  |
| -1.432959407 | 0.533281 | -1.16993 |
| -0.192393115 | 0.929261 | -0.14012 |
| -0.468451776 | 0.841438 | -0.37486 |
| -1.059673652 | 0.929318 | -0.1537  |
| -0.862117233 | 0.976683 | -0.04857 |
| 0.756074417  | 0.966578 | 0.09311  |
| 0.267212873  | 0.915439 | 0.17784  |
| 0.190822342  | 0.864138 | -0.36257 |
| 0.115511497  | 0.909372 | -0.23287 |
| 0.370355123  | 0.981521 | -0.05009 |
| -0.307614806 | 0.987642 | -0.02819 |
| -0.893277596 | 0.610491 | -0.94807 |
| -0.392139833 | 0.934205 | -0.15132 |

|              |          |          |
|--------------|----------|----------|
| -0.511556559 | 0.931746 | -0.14731 |
| -0.687489275 | 0.757024 | -0.61694 |
| 0.884522783  | 0.98247  | 0.05445  |
| 0.39791246   | 0.777151 | 0.51157  |
| -0.131466162 | 0.866007 | -0.29884 |
| -0.16366715  | 0.950977 | 0.10159  |
| 0.136262154  | 0.860833 | -0.31499 |
| -0.998339307 | 0.725227 | -0.60323 |
| -1.087462841 | 0.662394 | -0.5025  |
| -0.321928095 | 0.766909 | 0.48543  |
| -0.026996838 | 0.953862 | 0.10346  |
| -3.523561956 | 0.334253 | -1.9386  |
| -0.529228701 | 0.996688 | -0.00301 |
| -0.533808413 | 0.768797 | -0.21306 |
| -0.418131421 | 0.996175 | 0.00509  |
| -0.694433218 | 0.885305 | 0.05143  |
| -0.624021373 | 0.898285 | 0.0509   |
| -0.560864595 | 0.953138 | 0.06117  |
| -0.353947445 | 0.927275 | -0.11633 |
| -0.676110389 | 0.854575 | 0.15908  |
| -0.486964062 | 0.913507 | 0.11086  |
| -0.573642281 | 0.902136 | 0.09085  |
| 0.032421478  | 0.899884 | -0.23704 |
| 0.395141958  | 0.702204 | 0.44867  |
| -0.812541369 | 0.937961 | 0.09354  |
| -0.430740674 | 0.986437 | -0.02396 |
| -0.371389131 | 0.949218 | -0.08132 |
| -0.453523424 | 0.953604 | -0.0799  |
| -0.412374441 | 0.913719 | 0.07801  |
| -0.527995905 | 0.933182 | -0.09829 |
| -0.5152743   | 0.992147 | -0.01124 |
| -3           | 0.794363 | -0.41504 |
| -0.24287203  | 0.907978 | 0.1401   |
| -0.377727123 | 0.993185 | 0.01172  |
| -0.351593634 | 0.923776 | 0.09305  |
| -0.779417272 | 0.755032 | 0.17549  |
| -0.439906881 | 0.938279 | 0.07098  |
| -0.529038416 | 0.993644 | -0.01053 |
| -0.701391176 | 0.986976 | 0.01815  |
| -0.373114329 | 0.893581 | 0.15179  |
| -0.654413464 | 0.777335 | -0.45479 |
| -0.520136481 | 0.927814 | 0.09082  |
| -0.380515121 | 0.799793 | 0.26107  |
| -0.66740603  | 0.937244 | -0.06345 |
| -0.452883454 | 0.993452 | 0.01015  |
| -0.613967399 | 0.848382 | -0.17563 |
| -0.369535696 | 0.890047 | 0.09802  |
| -0.547385939 | 0.905804 | 0.0811   |
| #DIV/0!      | ?        | #DIV/0!  |
| #DIV/0!      | ?        | #DIV/0!  |
| #DIV/0!      | 1        | #DIV/0!  |
| #DIV/0!      | ?        | #DIV/0!  |
| -2           | 1        | 0        |
| -38.62627293 | 0.308068 | #NUM!    |
| -0.152003093 | 0.674847 | -1       |
| -1.252054879 | 0.803633 | -0.21097 |

|              |          |          |
|--------------|----------|----------|
| -0.813132643 | 0.868304 | 0.24252  |
| -1.46917411  | 0.872147 | 0.17848  |
| -1.047618478 | 0.885147 | 0.15408  |
| -1.821134263 | 0.821986 | -0.17397 |
| -0.436707434 | 0.870474 | 0.15847  |
| -0.612301209 | 0.956514 | -0.07236 |
| -0.803210435 | 0.854176 | -0.17919 |
| -0.560675451 | 0.945684 | -0.05694 |
| 0.004676487  | 0.502704 | 0.53573  |
| -0.768740531 | 0.840015 | 0.12286  |
| -0.593291485 | 0.94284  | 0.05128  |
| -0.27833146  | 0.866263 | 0.19295  |
| -0.314063463 | 0.709544 | 0.26282  |
| -0.447208757 | 0.809789 | 0.15731  |
| -0.295332333 | 0.99301  | 0.00813  |
| -0.598769691 | 0.885525 | 0.12967  |
| -1.366963702 | 0.3162   | -0.29165 |
| -0.987924543 | 0.60254  | -0.38239 |
| -0.568364555 | 0.838406 | 0.15797  |
| -0.790216793 | 0.970831 | -0.01904 |
| -0.681779323 | 0.904171 | 0.09425  |
| -0.045756824 | 0.925835 | -0.17429 |
| #DIV/0!      | 0.133887 | #DIV/0!  |
| -2.772589504 | 0.401154 | -1.77259 |
| -0.907436729 | 0.799767 | -0.44291 |
| -4.739539538 | 0.211261 | -2.35707 |
| 0            | 1        | 0        |
| -0.414567984 | 0.931925 | -0.14392 |
| -0.762208419 | 0.938196 | -0.1002  |
| -0.235378063 | 0.986809 | 0.02563  |
| 0.077479073  | 0.959285 | 0.09905  |
| -0.247927513 | 0.824438 | 0.38479  |
| -1.185266493 | 0.943239 | -0.11815 |
| -1.833990049 | 0.772651 | -0.47491 |
| #DIV/0!      | ?        | #DIV/0!  |
| -0.551757467 | 0.820949 | -0.25266 |
| -0.46866876  | 0.871869 | 0.16475  |
| -0.269700235 | 0.995207 | -0.00758 |
| -0.115799746 | 0.938987 | 0.1072   |
| -0.285631966 | 0.937773 | 0.10626  |
| -0.432106208 | 0.613251 | 0.62953  |
| -0.718229032 | 0.490822 | -0.71823 |
| -1.649813645 | 0.647534 | -0.77987 |
| #NUM!        | 0.495025 | -1.58496 |
| -0.582280335 | 0.950737 | -0.05001 |
| 0.03283778   | 0.950012 | 0.07549  |
| -0.442308808 | 0.921513 | -0.17195 |
| -0.339461938 | 0.9951   | 0.00799  |
| -0.471767005 | 0.903524 | 0.12793  |
| -0.452909972 | 0.939106 | -0.08979 |
| -0.554745294 | 0.890578 | -0.18338 |
| 0.561878888  | 0.895237 | 0.25154  |
| -0.414517478 | 0.981827 | -0.03426 |
| -0.454957687 | 0.916462 | 0.1222   |
| -0.516088298 | 0.854515 | -0.3358  |
| -0.391139232 | 0.986251 | -0.02164 |

|              |          |          |
|--------------|----------|----------|
| -0.152003093 | 0.558343 | -1.12928 |
| -2.120031612 | 0.433552 | -1.19236 |
| -0.346609732 | 0.957035 | -0.08156 |
| -1.807354922 | 0.76082  | -0.48543 |
| -2.325026935 | 0.586539 | -0.43702 |
| -0.091884295 | 0.990772 | 0.0154   |
| -0.235556082 | 0.974361 | -0.06071 |
| -0.404130186 | 0.95703  | -0.08454 |
| -2.60334103  | 0.415887 | -1.49643 |
| -0.074697367 | 0.941996 | -0.14248 |
| -0.152003093 | 0.890405 | 0.21168  |
| -0.214147615 | 0.723189 | 0.29546  |
| -0.310340121 | 0.762258 | -0.43063 |
| -0.385564881 | 0.989214 | 0.02065  |
| -0.490503065 | 0.968534 | -0.05004 |
| 0.016551176  | 0.946639 | -0.11849 |
| -0.592824618 | 0.927137 | 0.14886  |
| -1.647503967 | 0.928697 | 0.13352  |
| -0.224591917 | 0.957542 | 0.09233  |
| 0.087758506  | 0.634164 | 0.47172  |
| 1.065643937  | 0.720974 | 0.67491  |
| -0.218680829 | 0.737833 | 0.46973  |
| -0.36994961  | 0.944579 | 0.07619  |
| -0.3791923   | 0.883321 | 0.20282  |
| 0            | 0.450185 | #NUM!    |
| -3.169925001 | 0.227947 | -3.26012 |
| -1.919168925 | 0.994614 | -0.00981 |
| -0.691877705 | 0.514126 | -1.32193 |
| -0.464325462 | 0.847472 | 0.33993  |
| -1.194994885 | 0.873495 | -0.11337 |
| -0.105859215 | 0.769997 | 0.31307  |
| -0.23389771  | 0.908598 | -0.17144 |
| 0.066941159  | 0.996933 | -0.00763 |
| -0.454636435 | 0.954937 | -0.07897 |
| -0.527182064 | 0.932104 | -0.1375  |
| #DIV/0!      | ?        | #DIV/0!  |
| -0.400400918 | 0.972369 | -0.05246 |
| -0.324098897 | 0.995419 | 0.00787  |
| -1.615598522 | 0.898674 | -0.15418 |
| -0.219739845 | 0.992183 | 0.01382  |
| -0.142579088 | 0.963036 | 0.05564  |
| -0.140862536 | 0.490265 | 1.03862  |
| 0            | 0.622002 | -1       |
| -0.391736191 | 0.810372 | -0.27611 |
| -0.663793641 | 0.99645  | 0.00733  |
| -0.30270609  | 0.933687 | -0.12255 |
| -0.239825298 | 0.994874 | 0.01052  |
| 0.415037499  | 0.834708 | 0.41504  |
| -0.480854097 | 0.656936 | -0.41395 |
| -0.441316824 | 0.633374 | 0.54804  |
| 0.415037499  | 0.11658  | 0.62449  |
| 0.406426097  | 0.829697 | -0.50155 |
| -0.293018535 | 0.397012 | -1.05797 |
| #DIV/0!      | ?        | #DIV/0!  |
| -1           | 1        | 0        |
| -0.807354922 | 0.833297 | 0.36257  |

|              |          |          |
|--------------|----------|----------|
| 0.012205709  | 0.906207 | 0.15839  |
| -0.196839593 | 0.753303 | 0.29052  |
| -0.330855598 | 0.982087 | -0.02987 |
| -0.409545696 | 0.975593 | 0.03479  |
| -0.737544396 | 0.968462 | -0.02952 |
| -1.184545716 | 0.856474 | 0.17701  |
| -0.340763374 | 0.942562 | -0.11036 |
| -0.490943426 | 0.95681  | -0.07303 |
| -1.086587685 | 0.637514 | -0.69782 |
| #DIV/0!      | ?        | #DIV/0!  |
| 0            | 0.888898 | -0.26303 |
| -1.121990524 | 0.367946 | -0.8519  |
| -1.113062664 | 0.72794  | -0.59223 |
| -0.261889864 | 0.969612 | 0.05889  |
| -0.587873396 | 0.907481 | 0.12974  |
| -0.450349943 | 0.87366  | 0.29776  |
| -0.882893262 | 0.989954 | 0.02248  |
| 0.102623902  | 0.802339 | 0.50234  |
| -0.36610982  | 0.987111 | -0.02329 |
| -0.339660403 | 0.98823  | -0.02069 |
| -0.725159222 | 0.975362 | 0.03489  |
| -0.61389184  | 0.981104 | -0.02201 |
| -0.436545999 | 0.934331 | 0.09729  |
| -0.487409879 | 0.996605 | 0.00539  |
| -0.145111815 | 0.966984 | -0.07979 |
| -0.444423853 | 0.933569 | -0.15056 |
| -0.679157863 | 0.967166 | -0.06098 |
| -0.182398938 | 0.85307  | -0.35477 |
| 0.071008112  | 0.965221 | 0.04479  |
| -1.033954906 | 0.757398 | -0.08576 |
| -0.439027674 | 0.988359 | -0.02335 |
| 0.906890596  | 0.574988 | 0.58496  |
| -0.603580649 | 0.970931 | -0.01838 |
| -1           | 0.651448 | -1       |
| -1.353636955 | 0.340442 | -1.35364 |
| -0.394899854 | 0.937972 | 0.04983  |
| -0.241540263 | 0.981038 | 0.02801  |
| -0.555085912 | 0.987169 | -0.01672 |
| -0.281240259 | 0.967815 | 0.05506  |
| -0.343501137 | 0.966959 | -0.06756 |
| -0.350909292 | 0.889329 | 0.16996  |
| -0.480551962 | 0.808631 | -0.31383 |
| 0.021830248  | 0.913306 | 0.12865  |
| -0.177396251 | 0.928506 | 0.1328   |
| -0.380013704 | 0.98437  | 0.02667  |
| -0.044942577 | 0.957125 | 0.08517  |
| -0.000684878 | 0.981742 | -0.04027 |
| -0.163690678 | 0.984243 | -0.0299  |
| 0.173565415  | 0.547227 | 0.77694  |
| -0.698965019 | 0.934065 | -0.07318 |
| -0.63967571  | 0.838813 | 0.14981  |
| -0.843467377 | 0.911132 | 0.16487  |
| 0.462971976  | 0.832605 | 0.31411  |
| -0.343434581 | 0.970501 | -0.04232 |
| -0.695411891 | 0.818387 | 0.30954  |
| -2.099535674 | 0.523403 | -0.93726 |

|              |          |          |
|--------------|----------|----------|
| 0.26075935   | 0.979405 | 0.04396  |
| -0.083560453 | 0.941203 | -0.10724 |
| -0.333207573 | 0.955665 | -0.07053 |
| -0.443151226 | 0.876677 | 0.15122  |
| -0.205939502 | 0.963522 | 0.07234  |
| -0.921654258 | 0.982587 | -0.03195 |
| -0.410772953 | 0.98279  | -0.02455 |
| -0.837116486 | 0.990835 | -0.01054 |
| 0.235575305  | 0.97173  | -0.05853 |
| -0.225284682 | 0.97106  | 0.05005  |
| -0.321928095 | 1        | 0        |
| -0.584962501 | 0.756486 | -0.58496 |
| -0.607702111 | 0.926922 | -0.09597 |
| -0.238285397 | 0.936229 | 0.07296  |
| -0.543956613 | 0.890265 | -0.15809 |
| -0.633897626 | 0.871833 | -0.25771 |
| -1           | 1        | 0        |
| -0.318765445 | 0.927689 | -0.0975  |
| 0.154738308  | 0.627558 | 0.49129  |
| -0.134878054 | 0.932228 | -0.11292 |
| -0.994075166 | 0.530577 | -0.48602 |
| -0.354361266 | 0.880719 | 0.09619  |
| -0.404440807 | 0.968491 | 0.05419  |
| -0.692945182 | 0.851015 | -0.33509 |
| -0.402530513 | 0.961859 | -0.07643 |
| -0.753562105 | 0.996538 | 0.00353  |
| 0.061400545  | 0.591713 | 0.74322  |
| #DIV/0!      | 0.308068 | #DIV/0!  |
| -0.083768358 | 0.996556 | 0.00738  |
| -0.150593088 | 0.964193 | 0.06532  |
| -0.507198937 | 0.988476 | 0.01535  |
| -0.299368625 | 0.951959 | -0.09361 |
| -0.396844383 | 0.965489 | -0.05792 |
| -0.465160252 | 0.967553 | -0.05834 |
| -0.496706752 | 0.896134 | -0.23764 |
| -0.391950434 | 0.907512 | -0.20209 |
| -0.23885211  | 0.878312 | 0.2294   |
| 0.597765326  | 0.726133 | 0.44746  |
| -0.243576114 | 0.746834 | 0.28118  |
| -0.06383009  | 0.715573 | 0.59882  |
| #DIV/0!      | 0.308068 | #DIV/0!  |
| -0.241638331 | 0.709591 | 0.33029  |
| -0.198599514 | 0.971057 | 0.05161  |
| -0.436570661 | 0.900913 | 0.14205  |
| -0.37650927  | 0.880127 | 0.14644  |
| -0.650979544 | 0.945951 | -0.06535 |
| -0.288464154 | 0.952617 | 0.07192  |
| 0.959358016  | 0.557516 | 1.06848  |
| -1           | 0.976628 | -0.05063 |
| -0.684485886 | 0.933316 | -0.12763 |
| 0.140832558  | 0.961562 | 0.08788  |
| -1.064130337 | 0.844258 | -0.13124 |
| -1.336414562 | 0.333472 | -1.05136 |
| -0.536743176 | 0.687021 | 0.28574  |
| 1.321928095  | 0.534406 | 1.58496  |
| 0            | 0.651448 | 1        |

|              |          |          |
|--------------|----------|----------|
| 0            | 0.96267  | 0.08069  |
| -0.152003093 | 0.746895 | -0.65896 |
| -1.143257051 | 0.947329 | -0.09646 |
| -0.223861711 | 0.857497 | 0.24768  |
| 0.161589142  | 0.927704 | 0.10806  |
| -0.398874648 | 0.6069   | 0.19711  |
| -0.573962306 | 0.85477  | 0.11345  |
| -0.487917812 | 0.918703 | 0.11631  |
| -0.313774459 | 0.907669 | 0.12953  |
| -0.757829169 | 0.906479 | 0.11682  |
| -0.427463534 | 0.909411 | 0.15281  |
| -0.322530347 | 0.962861 | -0.06339 |
| -0.542763262 | 0.992763 | -0.00726 |
| -1.321928095 | 0.919527 | -0.152   |
| -0.530514717 | 0.874417 | -0.21501 |
| -0.94333522  | 0.995475 | -0.00341 |
| -0.471413347 | 0.905094 | -0.17493 |
| -0.730043698 | 0.981023 | -0.04084 |
| -0.853603984 | 0.797294 | 0.32228  |
| -0.505401527 | 0.977353 | 0.04814  |
| -0.279292991 | 0.902738 | -0.21828 |
| -0.26710407  | 0.590308 | -0.56478 |
| -0.867752202 | 0.52241  | 0.31962  |
| #DIV/0!      | ?        | #DIV/0!  |
| 0.529127287  | 0.51526  | 1.58496  |
| -0.823122238 | 0.734507 | 0.52083  |
| -0.175875969 | 0.967579 | 0.05763  |
| -0.806430414 | 0.934191 | 0.05088  |
| -0.504702854 | 0.734078 | 0.42278  |
| -1.384049807 | 0.283834 | -2.4132  |
| -1.777502483 | 0.949262 | 0.08707  |
| 3.563704969  | 0.747976 | 1.82362  |
| 0.254702188  | 0.678979 | 0.47006  |
| -0.43369362  | 0.926547 | -0.12978 |
| -1.123988717 | 0.78726  | -0.47865 |
| -25.49935911 | 0.342951 | 1.3151   |
| -1.450661409 | 0.564699 | -1.27009 |
| -0.267051766 | 0.969584 | -0.05504 |
| -0.518304076 | 0.806526 | -0.52759 |
| -0.029803807 | 0.930427 | 0.13893  |
| -0.26101806  | 0.811665 | -0.42291 |
| -0.143124942 | 0.976399 | -0.05722 |
| -0.645891499 | 0.907854 | -0.13132 |
| -0.219009782 | 0.843482 | 0.17218  |
| 0            | 0.034897 | #NUM!    |
| -0.131770661 | 0.91967  | 0.14292  |
| -0.263034406 | 0.690256 | -1       |
| -1.255257055 | 0.523643 | -0.78319 |
| -1.561547043 | 0.841227 | -0.23089 |
| #DIV/0!      | ?        | #DIV/0!  |
| 0.206450877  | 0.600825 | 0.88452  |
| -0.48032896  | 0.965352 | 0.05634  |
| 0.148863386  | 0.987632 | 0.03103  |
| -1.584962501 | 0.308068 | -1       |
| -0.695725566 | 0.972665 | 0.04531  |
| -0.556393349 | 0.985433 | 0.0241   |



|              |          |          |
|--------------|----------|----------|
| -0.973778185 | 0.833964 | -0.32794 |
| -1.121990524 | 0.853505 | -0.30256 |
| 0.91753784   | 0.215301 | 1.152    |
| 1.937909995  | 0.843894 | 0.36257  |
| -0.510796482 | 0.772703 | -0.33356 |
| -0.514573173 | 0.932567 | 0.11864  |
| -0.259742582 | 0.981158 | -0.03673 |
| -1.280107919 | 0.932023 | 0.16046  |
| -0.391450679 | 0.951205 | 0.06774  |
| -0.357426776 | 0.9545   | 0.05504  |
| -0.193325434 | 0.850233 | 0.22035  |
| -0.346288083 | 0.932176 | 0.09714  |
| -0.185485286 | 0.436378 | 0.39744  |
| -0.243113712 | 0.858695 | 0.21244  |
| -0.566225938 | 0.906717 | -0.16993 |
| 0.880947328  | 0.525255 | 0.793    |
| -2.584962501 | 0.450185 | -0.26303 |
| -1.266376742 | 0.989168 | -0.02283 |
| -0.311677998 | 0.932672 | -0.11784 |
| -0.829892644 | 0.995934 | 0.00328  |
| -0.501144042 | 0.949757 | 0.08228  |
| -0.132961642 | 0.620704 | 0.37642  |
| -0.45817858  | 0.937028 | 0.09427  |
| -0.080449832 | 0.95379  | 0.08083  |
| -0.63760398  | 0.880438 | 0.19049  |
| -0.362570079 | 0.886945 | 0.28951  |
| -0.666873699 | 0.973097 | 0.05514  |
| 0            | 0.230584 | 2        |
| -0.547771684 | 0.965699 | 0.06366  |
| -0.424663932 | 0.768742 | -0.59496 |
| -0.13745286  | 0.946489 | -0.11945 |
| -0.259059324 | 0.957142 | 0.08136  |
| -0.80434516  | 0.986853 | -0.02708 |
| -0.406517957 | 0.802457 | -0.42981 |
| -1.190420032 | 0.578566 | -0.84264 |
| -1.111471742 | 0.859601 | -0.27694 |
| -1.527963    | 0.67925  | -0.67997 |
| -0.38581249  | 0.506734 | 0.31455  |
| -0.84550628  | 0.910943 | -0.19547 |
| -0.261647548 | 0.981188 | -0.03631 |
| -0.592905783 | 0.87729  | 0.11235  |
| -0.298581985 | 0.909999 | 0.12985  |
| -0.21606354  | 0.856629 | 0.28478  |
| 0.531140859  | 0.792448 | 0.40154  |
| -0.518264359 | 0.911824 | 0.09155  |
| 0.029241138  | 0.900851 | 0.208    |
| -0.214504512 | 0.984648 | -0.02876 |
| -0.169925001 | 0.578734 | 0.54889  |
| 0.322463318  | 0.855867 | 0.31172  |
| -0.578743978 | 0.828358 | 0.21082  |
| -0.508924008 | 0.943761 | -0.0914  |
| -0.312640326 | 0.967257 | -0.04736 |
| -0.327747007 | 0.969273 | 0.05522  |
| 0.234465254  | 0.726505 | -0.62803 |
| -1.33439892  | 0.737235 | 0.49397  |
| -0.293818411 | 0.976558 | -0.04392 |

|              |          |          |
|--------------|----------|----------|
| -0.473657666 | 0.905003 | 0.15397  |
| -3.584962501 | 0.764931 | -0.12553 |
| -1.100599515 | 0.966955 | 0.01524  |
| -0.491019147 | 0.871912 | -0.12569 |
| -0.536579075 | 0.770016 | -0.31714 |
| -0.281057427 | 0.847573 | 0.18137  |
| -0.536822587 | 0.983991 | 0.02339  |
| -0.240936822 | 0.971742 | -0.05107 |
| -0.232089766 | 0.969547 | -0.04824 |
| -0.322161711 | 0.958167 | -0.08963 |
| -0.342613046 | 0.970748 | -0.05629 |
| -0.313540309 | 0.923379 | 0.11023  |
| -0.082777676 | 0.818433 | 0.32941  |
| -0.380586989 | 0.986652 | 0.02326  |
| -0.235724089 | 0.904832 | 0.16649  |
| -0.220420321 | 0.936125 | -0.1161  |
| -0.480620705 | 0.962362 | -0.07501 |
| 0.24314644   | 0.601443 | 0.84756  |
| 0.040308393  | 0.9329   | 0.15171  |
| -4.178803153 | 0.251987 | -3.34873 |
| -0.212404177 | 0.95262  | 0.10825  |
| -2.678071905 | 0.559242 | -1.19265 |
| -0.201583288 | 0.969122 | 0.05124  |
| -0.661309903 | 0.993121 | 0.01308  |
| -0.181984475 | 0.919551 | 0.16637  |
| -1.741081703 | 0.870307 | -0.22651 |
| -0.524143123 | 0.91786  | -0.175   |
| -0.510385376 | 0.922667 | -0.14549 |
| -0.161926493 | 0.981085 | -0.03562 |
| -0.656472607 | 0.655983 | -0.6352  |
| -0.314303076 | 0.870068 | -0.24871 |
| -0.211076294 | 0.998336 | -0.0025  |
| -0.322855575 | 0.996309 | 0.0074   |
| -0.555850752 | 0.991707 | 0.00805  |
| -0.932885804 | 0.416308 | -2.39232 |
| -0.461678224 | 0.947844 | -0.07117 |
| -0.5334322   | 0.591259 | 0.43458  |
| -0.603896356 | 0.940203 | 0.09938  |
| -0.772366174 | 0.969806 | -0.02744 |
| -0.802473672 | 0.427628 | 0.22551  |
| -0.452559368 | 0.965153 | -0.06273 |
| -0.151731885 | 0.986468 | -0.02214 |
| -0.679525502 | 0.851604 | -0.2674  |
| -0.3825415   | 0.917131 | 0.12335  |
| -0.761389068 | 0.968591 | -0.04992 |
| -1.481100065 | 0.888629 | -0.2363  |
| -0.360605758 | 0.855276 | 0.13381  |
| -0.414184446 | 0.999784 | 0.00037  |
| -1.045866973 | 0.922926 | 0.14189  |
| -0.519954926 | 0.988122 | 0.01758  |
| -0.317638659 | 0.945625 | -0.10189 |
| -0.830074999 | 0.528557 | -1.41504 |
| -0.186000631 | 0.952672 | -0.09154 |
| -0.684569049 | 0.996061 | 0.0066   |
| -0.790361851 | 0.898435 | -0.2133  |
| -0.96829114  | 0.723317 | -0.24393 |

|              |          |          |
|--------------|----------|----------|
| -0.242511873 | 0.959317 | 0.0573   |
| -0.690015425 | 0.880564 | -0.19723 |
| -0.410044805 | 0.801746 | 0.22654  |
| -0.659590089 | 0.875943 | -0.15841 |
| -0.205266414 | 0.84939  | 0.21457  |
| -0.475997414 | 0.980684 | 0.02877  |
| -0.492379588 | 0.934521 | 0.10783  |
| -0.25328847  | 0.973646 | 0.05106  |
| -0.382135388 | 0.979685 | 0.03331  |
| -0.458345185 | 0.998663 | 0.00209  |
| -0.449860645 | 0.980267 | -0.03426 |
| -0.70615273  | 0.932555 | -0.08513 |
| -0.110201223 | 0.829227 | 0.26188  |
| -0.340857823 | 0.924881 | -0.1661  |
| -0.452276093 | 0.995534 | -0.00735 |
| -1.197076608 | 0.951919 | -0.04638 |
| -0.35053791  | 0.926907 | -0.13637 |
| -0.373950242 | 0.93879  | -0.11653 |
| #DIV/0!      | 1        | #DIV/0!  |
| -0.57582966  | 0.95705  | 0.05306  |
| -0.509784498 | 0.949768 | -0.07556 |
| 0.736965594  | 0.63703  | 0.87447  |
| -0.357980015 | 0.96562  | -0.0668  |
| -0.577635441 | 0.992081 | -0.0118  |
| -0.485729511 | 0.944425 | 0.06664  |
| -0.467558301 | 0.978361 | 0.03316  |
| -0.294827802 | 0.919761 | 0.13729  |
| -0.34797323  | 0.907584 | 0.13965  |
| -0.21190783  | 0.977015 | 0.03867  |
| -0.286799559 | 0.989815 | -0.01755 |
| -0.276249189 | 0.995469 | -0.00813 |
| -0.421354238 | 0.927956 | -0.15372 |
| -0.487816715 | 0.902128 | -0.16422 |
| -0.357255128 | 0.854535 | 0.16749  |
| -0.507743756 | 0.990404 | -0.01473 |
| 0.235923706  | 0.912791 | 0.14705  |
| -2.608809243 | 0.285854 | -2.60881 |
| -0.626643666 | 0.986601 | -0.01511 |
| 1.459431619  | 0.617945 | 1.16993  |
| -0.38867968  | 0.933242 | -0.10613 |
| -0.476141103 | 0.959659 | -0.084   |
| -0.657738903 | 0.846883 | -0.35726 |
| -0.095274053 | 0.990746 | -0.01892 |
| -0.451379346 | 0.956537 | -0.08881 |
| -0.869603363 | 0.714301 | -0.44127 |
| -0.277887534 | 0.76064  | 0.43339  |
| -0.360003006 | 0.900137 | -0.23832 |
| 0.025279408  | 0.969068 | 0.07628  |
| -0.667117746 | 0.996327 | -0.00753 |
| -1.306943692 | 0.94125  | -0.11844 |
| -0.225651897 | 0.731518 | 0.29846  |
| -0.532013621 | 0.982687 | -0.03115 |
| -0.407616559 | 0.905269 | -0.18369 |
| -0.234833033 | 0.997881 | -0.00452 |
| -1.781718995 | 0.46746  | -1.15136 |
| -0.35033181  | 0.890949 | -0.19076 |

|              |          |          |
|--------------|----------|----------|
| -1.295455884 | 0.941071 | -0.11103 |
| -0.571643358 | 0.968206 | -0.04447 |
| -0.279864035 | 0.984065 | 0.02469  |
| -0.47883415  | 0.87621  | -0.15231 |
| -0.317516057 | 0.992124 | -0.01249 |
| -0.836139996 | 0.991974 | -0.00904 |
| -0.268049309 | 0.947415 | -0.11112 |
| 0.199308808  | 0.88314  | -0.23133 |
| -0.675583257 | 0.918088 | 0.08897  |
| -0.567684509 | 0.963666 | -0.06034 |
| -0.332887307 | 0.986196 | 0.02198  |
| -0.554501397 | 0.696668 | 0.50489  |
| -1.5360529   | 0.25024  | 0.94937  |
| -0.403355694 | 0.849406 | -0.31316 |
| -0.087594001 | 0.99121  | -0.01582 |
| -0.144560453 | 0.981249 | -0.04062 |
| -0.49999521  | 0.74431  | 0.23231  |
| -0.395516065 | 0.915145 | -0.19051 |
| -0.696131877 | 0.805644 | 0.34792  |
| -0.316927414 | 0.971473 | -0.06611 |
| -0.755269057 | 0.967259 | -0.06761 |
| -0.716207034 | 0.598855 | -0.81207 |
| -0.448825813 | 0.886611 | -0.28728 |
| -0.567343062 | 0.993268 | -0.01469 |
| -0.302760684 | 0.939062 | 0.13948  |
| -0.197113667 | 0.968164 | 0.05549  |
| -0.369469183 | 0.81406  | 0.15396  |
| -1.117641611 | 0.882636 | -0.19272 |
| -0.64842892  | 0.992054 | -0.01223 |
| -0.3382323   | 0.989952 | 0.01758  |
| -0.457472766 | 0.74779  | 0.2676   |
| -0.634284437 | 0.947194 | 0.05772  |
| -0.412703311 | 0.864724 | 0.20672  |
| 0.044699807  | 0.771077 | 0.37151  |
| -1.176322773 | 0.674501 | -0.32033 |
| -0.310904468 | 0.928355 | 0.06979  |
| -1.503324032 | 0.474055 | -1.18757 |
| -0.093972488 | 0.850434 | 0.1717   |
| -0.409574217 | 0.952931 | -0.08578 |
| #DIV/0!      | 0.329316 | #DIV/0!  |
| 0.201429528  | 0.728818 | 0.41973  |
| -0.007969243 | 0.985795 | -0.02944 |
| -0.522010375 | 0.937953 | -0.10095 |
| -0.543275925 | 0.855977 | -0.31991 |
| -0.612325626 | 0.958813 | 0.07188  |
| -0.459431619 | 0.845931 | 0.29546  |
| -0.507493826 | 0.950349 | -0.08076 |
| -0.543347669 | 0.956506 | -0.0775  |
| -0.708015634 | 0.934367 | -0.10752 |
| -0.521423653 | 0.937539 | -0.11567 |
| -0.38360364  | 0.997856 | -0.00333 |
| -0.32610704  | 0.987831 | 0.0206   |
| -0.410653737 | 0.941691 | -0.1194  |
| -0.254813899 | 0.982091 | 0.02722  |
| -0.470041363 | 0.980425 | -0.035   |
| -0.58679184  | 0.965992 | 0.04525  |

|              |          |          |
|--------------|----------|----------|
| -0.437449435 | 0.869809 | -0.26714 |
| -0.400109154 | 0.919509 | -0.17423 |
| -0.356071301 | 0.937707 | -0.14397 |
| -0.424971561 | 0.926896 | -0.15915 |
| -0.385938186 | 0.977192 | -0.03881 |
| -0.307599958 | 0.958503 | -0.06738 |
| -1.340306624 | 0.853821 | -0.28638 |
| 0.943416472  | 0.843013 | 0.29956  |
| -0.319068441 | 0.997695 | 0.00476  |
| -0.449037447 | 0.939116 | -0.13437 |
| -0.683142895 | 0.97434  | -0.05511 |
| -0.415037499 | 0.334339 | -2       |
| -0.24489861  | 0.959053 | 0.07374  |
| -0.386617663 | 0.964848 | -0.05873 |
| -0.357365375 | 0.952702 | -0.09178 |
| -0.372080299 | 0.972933 | 0.04709  |
| -0.484978391 | 0.792533 | -0.45803 |
| -1.518138148 | 0.828028 | -0.29622 |
| -0.424858883 | 0.972139 | -0.03965 |
| -1.693896872 | 0.990823 | 0.00923  |
| -0.943799861 | 0.62868  | -0.7139  |
| 0.157838203  | 0.784502 | 0.33105  |
| -0.56027277  | 0.918692 | -0.15107 |
| -1.249904602 | 0.753188 | -0.47381 |
| -0.628071007 | 0.944894 | -0.07372 |
| 0.418268621  | 0.909016 | 0.24349  |
| #DIV/0!      | ?        | #DIV/0!  |
| -0.281271716 | 0.90801  | -0.19603 |
| -1.542910712 | 0.83651  | 0.2748   |
| -0.672141659 | 0.978874 | -0.03636 |
| -0.132029715 | 0.940728 | -0.14144 |
| -1.233619677 | 0.743353 | -0.53318 |
| -0.523563524 | 0.8923   | -0.25678 |
| -1.609281131 | 0.933977 | 0.10609  |
| -0.71300408  | 0.988603 | -0.02095 |
| -0.643253289 | 0.858181 | -0.27312 |
| 1.658763801  | 0.866065 | 0.51974  |
| -0.574508143 | 0.527025 | -1.04079 |
| -1.216965142 | 0.708714 | 0.57511  |
| -1.3800849   | 0.806857 | -0.39551 |
| -0.76640522  | 0.988797 | 0.01436  |
| 0.01882949   | 0.692702 | -0.57778 |
| -1.395648673 | 0.211018 | -2.4512  |
| -0.385234288 | 0.97655  | 0.04315  |
| #DIV/0!      | 0.680109 | #DIV/0!  |
| -0.796466606 | 0.883854 | -0.2115  |
| -0.199630469 | 0.975417 | 0.05124  |
| -0.906890596 | 0.815802 | -0.32193 |
| -2.2410081   | 0.411963 | -0.53051 |
| 2            | 0.403983 | 1.76553  |
| 0.736965594  | 1        | 0        |
| -0.232489929 | 0.966382 | 0.06954  |
| -0.239472113 | 0.916219 | -0.20419 |
| -0.560128002 | 0.946256 | -0.11975 |
| -0.560823368 | 0.83921  | -0.3114  |
| 0.206450877  | 0.867148 | 0.25686  |

|              |          |          |
|--------------|----------|----------|
| -0.251979217 | 0.962379 | 0.05889  |
| 0.191072658  | 0.955836 | 0.10504  |
| 0.099744291  | 0.924917 | -0.20477 |
| -0.033243292 | 0.971546 | -0.07072 |
| -0.279779489 | 0.95529  | -0.10178 |
| 0.264201832  | 0.959946 | 0.10767  |
| 0.265036759  | 0.992214 | -0.0218  |
| 0.081079606  | 0.886824 | -0.28902 |
| -2.584962501 | 0.88627  | 0.22239  |
| -0.165447558 | 0.773393 | -0.5824  |
| 0.377670647  | 0.842789 | 0.28204  |
| 0.012756007  | 0.984561 | -0.02325 |
| -0.533951651 | 0.98485  | 0.01891  |
| -0.3280494   | 0.883913 | 0.15473  |
| -0.579357688 | 0.97538  | 0.03543  |
| -0.133174832 | 0.81994  | 0.25651  |
| -0.454094975 | 0.904099 | 0.11245  |
| -0.422462195 | 0.97684  | 0.03737  |
| 0.2793824    | 0.817685 | 0.25892  |
| -0.111935742 | 0.829215 | 0.24889  |
| -0.437101235 | 0.934244 | -0.12708 |
| -0.698710075 | 0.98871  | 0.01925  |
| -0.477262071 | 0.906566 | 0.13707  |
| -0.175367087 | 1        | 0        |
| -0.027798452 | 0.832195 | 0.26807  |
| -0.320815524 | 0.943382 | -0.10222 |
| -0.488437932 | 0.985487 | -0.02083 |
| -0.034549559 | 0.919833 | -0.19319 |
| -0.545946088 | 0.965746 | 0.07065  |
| -0.637429921 | 0.935333 | 0.08139  |
| -0.455319544 | 0.985537 | -0.0289  |
| -0.370120353 | 0.72915  | 0.25531  |
| -0.566300711 | 0.818836 | 0.19728  |
| -0.259419122 | 0.686528 | 0.33052  |
| -0.45460511  | 0.933881 | 0.10324  |
| -0.106414268 | 0.802091 | 0.31475  |
| -1.237039197 | 0.86237  | -0.18641 |
| -0.184280294 | 0.889909 | 0.1648   |
| -0.328640547 | 0.971466 | 0.04817  |
| -0.189350438 | 0.978535 | 0.04049  |
| -0.857334771 | 0.898194 | 0.09988  |
| -0.597818539 | 0.953546 | 0.08837  |
| -1.610725597 | 0.648006 | -0.82018 |
| -1.362495381 | 0.738515 | 0.50781  |
| -0.428559644 | 0.998451 | -0.00296 |
| -0.401404348 | 0.847736 | 0.20047  |
| -0.69350395  | 0.922925 | -0.06255 |
| -0.124626655 | 0.970563 | 0.0585   |
| 0.092178864  | 0.725257 | 0.3591   |
| 0.19133959   | 0.757574 | 0.35046  |
| -1           | 0.230584 | -2       |
| 0            | 1        | 0        |
| -1.027480736 | 0.693018 | -0.37037 |
| 0.023716069  | 0.967356 | -0.05967 |
| -1.280107919 | 0.327385 | -2.08746 |
| 0.506157158  | 0.928461 | 0.1711   |

|              |          |          |
|--------------|----------|----------|
| -0.913556474 | 0.753445 | -0.13071 |
| -1.288581591 | 0.963723 | -0.0663  |
| -0.462623759 | 0.967178 | 0.05659  |
| -0.077890267 | 0.977792 | -0.04675 |
| -0.201020952 | 0.889219 | 0.21706  |
| -0.381098648 | 0.962912 | -0.06882 |
| -0.607186918 | 0.897582 | 0.10626  |
| -0.263034406 | 0.414414 | -2.58496 |
| -0.649476777 | 0.955882 | -0.04132 |
| -0.410323211 | 0.964461 | 0.05988  |
| -0.470579063 | 0.980249 | 0.02815  |
| -0.198516223 | 0.894778 | -0.23283 |
| -0.9914885   | 0.602701 | -0.90369 |
| -1.234722702 | 0.998276 | 0.00328  |
| -0.537656786 | 0.92332  | -0.1343  |
| -0.576218868 | 0.903425 | 0.2203   |
| -0.998939932 | 0.889899 | -0.24294 |
| 0.015198351  | 0.953937 | -0.11938 |
| -0.590550978 | 0.921284 | -0.15685 |
| -1.341689691 | 0.474121 | -1.36678 |
| -0.197189238 | 0.932556 | -0.15658 |
| -0.954266291 | 0.772038 | -0.17983 |
| -0.596407475 | 0.695251 | 0.44667  |
| -0.30219603  | 0.515361 | 0.67041  |
| -0.841122825 | 0.806154 | -0.4455  |
| 0.046459311  | 0.912391 | -0.18442 |
| -0.314710441 | 0.913563 | 0.13183  |
| -0.382779721 | 0.958072 | 0.05345  |
| -0.454610578 | 0.916031 | -0.14065 |
| -0.560360527 | 0.942166 | -0.1253  |
| -0.244089743 | 0.967561 | -0.07405 |
| -0.344806327 | 0.990736 | 0.02194  |
| -0.296357034 | 0.995464 | 0.00727  |
| -0.126854607 | 0.703717 | 0.22525  |
| -1.237039197 | 0.884752 | 0.10535  |
| 0.584962501  | 0.885352 | -0.41504 |
| -0.463120498 | 0.899606 | 0.148    |
| -1.879230492 | 0.963818 | -0.07063 |
| -0.418373212 | 0.998969 | -0.00167 |
| -0.761809665 | 0.955646 | -0.04503 |
| -0.359575382 | 0.972584 | 0.02428  |
| -0.451563375 | 0.945764 | 0.04995  |
| -0.418001217 | 0.943787 | 0.0754   |
| -0.495048219 | 0.788233 | 0.19819  |
| -1.304795812 | 0.872299 | -0.25535 |
| -0.553519453 | 0.733466 | -0.60466 |
| 0.077786782  | 0.980083 | 0.04439  |
| -0.344712923 | 0.953811 | -0.0656  |
| -0.520148907 | 0.937272 | -0.12485 |
| -0.470440307 | 0.928326 | -0.14106 |
| 1            | 0.622002 | #NUM!    |
| -0.266442774 | 0.933268 | -0.13983 |
| -0.344027752 | 0.888726 | -0.24127 |
| -0.182791557 | 0.896821 | -0.23867 |
| -0.536226228 | 0.881425 | 0.11393  |
| -1.027932193 | 0.75433  | -0.40807 |

|              |          |          |
|--------------|----------|----------|
| -1.475733431 | 0.294648 | -1.47573 |
| -1.242060368 | 0.984334 | -0.02622 |
| -1.033238658 | 0.882453 | 0.13035  |
| -1.35176612  | 0.628394 | 0.49114  |
| -0.511990907 | 0.951366 | -0.06506 |
| 0            | 0.785812 | 0.41504  |
| -0.123968678 | 0.938356 | 0.09379  |
| -2.078002512 | 0.786659 | -0.49304 |
| 0.362570079  | 0.866407 | 0.36257  |
| -0.675766941 | 0.983811 | -0.01194 |
| -0.587204949 | 0.927565 | -0.10006 |
| -1.584962501 | 0.409302 | -1.58496 |
| -0.488733526 | 0.970172 | -0.05613 |
| -1.743426398 | 0.878457 | 0.21519  |
| 1.431805713  | 0.748077 | 0.79395  |
| -0.777865548 | 0.935178 | 0.13931  |
| -1.324315508 | 0.444848 | -1.43582 |
| -0.903119323 | 0.599889 | -0.65439 |
| -0.391515824 | 0.947088 | 0.07167  |
| #DIV/0!      | ?        | #DIV/0!  |
| 0.274209949  | 0.9239   | 0.17939  |
| 0.088984891  | 0.795193 | 0.47919  |
| 0.77771162   | 0.934559 | 0.17719  |
| -0.257387843 | 0.882018 | 0.16789  |
| 0.529405971  | 0.908487 | 0.23691  |
| -0.915487663 | 0.907857 | -0.19922 |
| -0.362061127 | 0.863694 | 0.18417  |
| -0.158886492 | 0.958969 | 0.08955  |
| -0.339887186 | 0.865361 | 0.18877  |
| #DIV/0!      | 0.308068 | #DIV/0!  |
| -0.710233695 | 0.768818 | -0.41409 |
| -0.280933553 | 0.958044 | 0.08895  |
| -0.68181707  | 0.934977 | -0.11849 |
| -0.710720326 | 0.858222 | 0.19885  |
| -0.071850285 | 0.978128 | -0.04449 |
| -0.351564329 | 0.994173 | 0.00798  |
| -0.344851051 | 0.899376 | -0.16636 |
| -0.173064709 | 0.901844 | -0.20887 |
| -0.477321778 | 0.894502 | 0.14805  |
| -0.433497034 | 0.673525 | 0.2631   |
| 0.099535674  | 0.781052 | -0.63743 |
| 1.321928095  | 0.739226 | 1        |
| 1            | 0.308068 | 2        |
| -0.546239129 | 0.973467 | 0.0405   |
| -0.089267338 | 0.889851 | 0.17466  |
| -0.519978556 | 0.988777 | 0.01578  |
| -0.6387852   | 0.986642 | 0.01817  |
| -0.768243951 | 0.866454 | -0.17932 |
| -0.948161068 | 0.69923  | -0.54591 |
| -0.155376693 | 0.92505  | 0.1559   |
| -0.231643295 | 0.709666 | 0.3373   |
| -1           | 0.651448 | -1       |
| -0.035103801 | 0.990643 | -0.0155  |
| -0.341862022 | 0.924372 | 0.10267  |
| 0.100543025  | 0.907641 | 0.20768  |
| -0.681580691 | 0.878411 | -0.17358 |



|              |           |          |
|--------------|-----------|----------|
| -0.361377366 | 0.925398  | 0.09335  |
| -0.601464094 | 0.931334  | -0.12393 |
| -1.69805628  | 0.645814  | 0.33862  |
| 0.299560282  | 0.974693  | -0.05658 |
| -0.981852653 | 0.682459  | 0.35443  |
| -0.405368851 | 0.985158  | -0.02305 |
| -0.598094077 | 0.784334  | -0.37693 |
| -0.911190733 | 0.584459  | -0.76783 |
| -1.074359254 | 0.574409  | -0.76975 |
| -0.763932642 | 0.793654  | -0.43574 |
| -0.872883094 | 0.80981   | 0.36266  |
| -0.408991792 | 0.957128  | -0.06362 |
| -0.516207455 | 0.979872  | -0.0421  |
| -0.57687512  | 0.925933  | 0.1019   |
| -1.584962501 | 0.610588  | -1.09954 |
| -0.423396179 | 0.964943  | -0.05773 |
| -0.620455771 | 0.969846  | -0.06769 |
| -1.558003495 | 0.979218  | 0.02866  |
| -0.565616647 | 0.981524  | -0.03083 |
| -0.46322996  | 0.884928  | 0.15332  |
| -0.613106766 | 0.973956  | 0.04733  |
| 0.028596119  | 0.970341  | -0.07154 |
| -0.074272762 | 0.8767    | 0.20978  |
| 0.255257055  | 0.0618238 | 0.94466  |
| -0.758513277 | 0.977114  | -0.02249 |
| -0.285551338 | 0.935357  | 0.06046  |
| -0.179978666 | 0.98149   | 0.02647  |
| -0.468418596 | 0.482537  | 0.36714  |
| -0.169437687 | 0.974143  | 0.03467  |
| -0.317605872 | 0.91067   | -0.20284 |
| -0.185639472 | 1         | 0        |
| -0.126742044 | 0.999004  | -0.00222 |
| -0.534134106 | 0.918467  | 0.17619  |
| 0.169925001  | 0.717544  | 0.52356  |
| -0.054959718 | 0.845081  | 0.25572  |
| 0.1260413    | 0.919216  | 0.16754  |
| 0.05526229   | 0.985334  | 0.03129  |
| -0.459431619 | 0.690012  | -0.73697 |
| -0.662965013 | 0.729266  | -0.54749 |
| -0.352618731 | 0.969562  | -0.05608 |
| -1.584962501 | 0.764931  | -0.58496 |
| -0.683350707 | 0.892806  | -0.20945 |
| -1.341036918 | 0.707635  | -0.54749 |
| #DIV/0!      | ?         | #DIV/0!  |
| -0.963474124 | 0.929572  | -0.14699 |
| -0.160464672 | 1         | 0        |
| 0.699303854  | 0.655211  | 0.8768   |
| -0.389291111 | 0.993193  | 0.0092   |
| -0.417114814 | 0.920164  | -0.15431 |
| #NUM!        | 0.18169   | -0.73697 |
| -0.715651815 | 0.980479  | -0.02438 |
| -0.049753035 | 0.973164  | 0.05987  |
| #DIV/0!      | 0.308068  | #DIV/0!  |
| #NUM!        | 0.0917211 | #NUM!    |
| -0.298923359 | 0.851398  | 0.19492  |
| -0.278837568 | 0.987287  | 0.02645  |

|              |           |          |
|--------------|-----------|----------|
| 0.150025444  | 0.976069  | -0.04008 |
| -0.750021747 | 0.461212  | -1.30256 |
| 0.485426827  | 0.83713   | -0.51457 |
| -0.409386821 | 0.856157  | -0.31921 |
| -0.272435656 | 0.960135  | 0.06271  |
| 0.278716028  | 0.810798  | 0.39119  |
| 0.169925001  | 0.774789  | 0.58496  |
| -0.8107884   | 0.878847  | -0.28505 |
| -0.732519689 | 0.603247  | -0.87224 |
| -0.321928095 | 0.604181  | 1.1375   |
| -0.222392421 | 1         | 0        |
| #DIV/0!      | ?         | #DIV/0!  |
| -0.36584995  | 0.896128  | 0.17732  |
| -0.614531186 | 0.954466  | 0.06195  |
| 1.263034406  | 0.897841  | 0.26303  |
| -0.048977735 | 0.944147  | 0.07607  |
| 0.2410081    | 0.903569  | 0.24101  |
| -0.547487795 | 0.941228  | -0.078   |
| -0.001569853 | 0.989974  | 0.01793  |
| -0.639824436 | 0.744654  | 0.3433   |
| -1.176877762 | 0.690143  | -0.57116 |
| 0.433117543  | 0.987022  | -0.03578 |
| -1.678071905 | 1         | 0        |
| -0.536102106 | 0.946108  | 0.09336  |
| -1.278990479 | 0.885428  | -0.2163  |
| -0.294183104 | 0.830155  | 0.2677   |
| 0.887533969  | 0.529906  | 1.26453  |
| 0.736965594  | 0.523243  | 1        |
| -1.097729848 | 0.988888  | -0.0127  |
| -0.240984936 | 0.91648   | 0.18766  |
| -1.11783649  | 0.702688  | -0.76553 |
| -0.405712883 | 0.828998  | 0.16334  |
| -0.663817921 | 0.979345  | -0.03103 |
| -3.349205509 | 0.395902  | -1.74837 |
| -0.068338569 | 0.779117  | 0.25576  |
| -0.358512051 | 0.94231   | 0.08486  |
| -0.289506617 | 0.75121   | 0.41036  |
| #NUM!        | 0.308068  | #NUM!    |
| -0.532041109 | 0.98096   | 0.04308  |
| -0.63005039  | 0.857999  | -0.30127 |
| 0.892948252  | 0.173226  | 1.08579  |
| -0.479521591 | 0.912452  | -0.05341 |
| #DIV/0!      | ?         | #DIV/0!  |
| 1            | 0.717686  | -1.58496 |
| #DIV/0!      | ?         | #DIV/0!  |
| -1.830074999 | 0.356439  | -1.29956 |
| -0.388070452 | 0.854927  | 0.32736  |
| -0.787518506 | 0.980748  | -0.02636 |
| -2.583035529 | 0.0287501 | -3.11814 |
| -0.22851053  | 0.93713   | -0.13685 |
| -0.293499687 | 0.927965  | -0.13142 |
| -1.867373939 | 0.889049  | 0.14224  |
| 0.899825207  | 0.355443  | 0.82926  |
| -1.645328187 | 0.499604  | -0.82915 |
| -0.074135408 | 0.978778  | -0.04072 |
| -0.750640531 | 0.480862  | -0.68353 |

|              |           |          |
|--------------|-----------|----------|
| -0.500229452 | 0.959901  | -0.05607 |
| 0.415037499  | 0.702697  | 0.73697  |
| 0.222392421  | 0.512628  | 0.61481  |
| -0.355791547 | 0.994262  | -0.00883 |
| -1.131822988 | 0.630485  | -0.62579 |
| -0.109624491 | 0.990112  | -0.02025 |
| -1.700439718 | 0.82727   | -0.24101 |
| 0.233859395  | 0.993036  | -0.01909 |
| -2.544320516 | 0.293557  | -1.80735 |
| -0.561878888 | 0.991998  | -0.01336 |
| -2.614078895 | 0.0668143 | -1.31289 |
| -1.892059784 | 0.988431  | 0.02251  |
| -0.722466024 | 0.516926  | -0.34395 |
| 0            | 0.710482  | 0.58496  |
| 0.177998302  | 0.994696  | 0.0145   |
| -0.398743692 | 0.88019   | -0.2798  |
| -1.121990524 | 0.918829  | 0.04227  |
| -0.819045533 | 0.919609  | 0.08312  |
| 1.161372285  | 0.580145  | 0.86555  |
| 0            | 0.710482  | -1       |
| -1.163498732 | 0.653426  | -0.71989 |
| -2.099535674 | 0.400869  | -1       |
| -0.658195195 | 0.905596  | -0.05796 |
| 0.302245729  | 0.866486  | 0.21399  |
| -2           | 0.630057  | -1       |
| -0.362570079 | 0.925659  | -0.16993 |
| -0.371185958 | 0.735704  | 0.44614  |
| -1.27649214  | 0.869096  | -0.26775 |
| -0.839535328 | 0.626969  | -1       |
| -0.800565756 | 0.838222  | -0.3504  |
| 0            | 0.756486  | 0.58496  |
| 0.7589919    | 0.694161  | 0.60073  |
| 0.215728691  | 0.924724  | 0.14734  |
| 0.719263592  | 0.784247  | 0.4498   |
| -0.289506617 | 1         | 0        |
| 1.584962501  | 0.724378  | #NUM!    |
| -1.667262336 | 0.519548  | -1.11287 |
| -0.318106688 | 0.981414  | -0.04211 |
| -1.516299744 | 0.831115  | 0.30325  |
| -0.889525096 | 0.902324  | -0.13326 |
| -1.814180911 | 0.492465  | -1.19726 |
| #NUM!        | 0.82727   | -0.28951 |
| -0.551561929 | 0.878317  | -0.20826 |
| -0.346179916 | 0.988201  | -0.02371 |
| -0.659447327 | 0.999234  | 0.001    |
| -0.187859066 | 0.954468  | -0.09162 |
| -0.566796115 | 0.962408  | -0.05972 |
| -0.897294517 | 0.879332  | -0.24668 |
| -0.468006354 | 0.89787   | -0.21139 |
| -1.807354922 | 0.844837  | 0.19265  |
| -0.459357893 | 0.983562  | 0.03093  |
| -0.390162831 | 0.85444   | 0.20163  |
| -0.268854922 | 0.935402  | 0.09091  |
| 0.054996114  | 0.718878  | 0.38079  |
| -0.615607818 | 0.936717  | -0.08096 |
| -0.343576971 | 0.912695  | 0.11507  |

|              |          |          |
|--------------|----------|----------|
| -1.010973283 | 0.874838 | 0.23454  |
| -2.14404637  | 0.464015 | -1.22566 |
| -0.719962276 | 0.830269 | -0.3463  |
| -0.381925999 | 0.85449  | 0.17121  |
| -0.380331821 | 0.918326 | 0.1272   |
| -0.834662268 | 0.6896   | 0.52177  |
| -1.584962501 | 0.764011 | -0.39148 |
| -0.313416595 | 0.992078 | 0.01275  |
| -0.312491719 | 0.855804 | 0.16598  |
| -0.372333048 | 0.976524 | -0.03288 |
| -0.516270537 | 0.95504  | -0.04532 |
| -0.235575335 | 0.948484 | 0.0821   |
| 0.008436837  | 0.914991 | -0.17045 |
| -0.565459389 | 0.83958  | -0.31266 |
| -0.327281329 | 0.915145 | 0.16731  |
| 0.066427362  | 0.883615 | 0.25546  |
| 0.736965594  | 0.513713 | -1.58496 |
| 0.175475221  | 0.9886   | -0.02131 |
| -0.266722593 | 0.976719 | -0.04532 |
| -0.551947443 | 0.965418 | -0.06091 |
| -0.178203566 | 0.984441 | 0.03314  |
| -0.080189728 | 0.93711  | 0.10967  |
| -0.377931827 | 0.93473  | -0.15279 |
| -0.584123773 | 0.858092 | 0.09512  |
| -0.661022604 | 0.820712 | 0.36957  |
| 0            | 0.782716 | -0.28951 |
| -1.502500341 | 0.401955 | -1.08746 |
| -0.307667402 | 0.963575 | -0.0585  |
| -0.975645671 | 0.792501 | -0.37191 |
| -2.472416679 | 0.722405 | -0.48658 |
| -1.610654223 | 0.93867  | 0.11499  |
| -0.444127489 | 0.883108 | -0.25572 |
| -0.341345017 | 0.960276 | -0.0665  |
| -0.422664685 | 0.828012 | 0.16698  |
| -0.480355413 | 0.581767 | 0.4921   |
| -0.260759695 | 0.790485 | 0.23388  |
| -0.270278944 | 0.967176 | 0.0382   |
| -0.348676854 | 0.894446 | 0.13072  |
| 0.183911196  | 0.838331 | 0.33398  |
| -0.145059744 | 0.93561  | 0.1111   |
| -1.023276732 | 0.871668 | -0.16182 |
| -0.584740837 | 0.891483 | 0.12301  |
| -0.329847758 | 0.756234 | -0.48332 |
| 0.408805546  | 0.886639 | 0.16439  |
| 0.032604665  | 0.936454 | -0.14287 |
| 0.171381534  | 0.895882 | 0.24516  |
| -1.432667393 | 0.707234 | 0.31138  |
| -0.058893689 | 0.929295 | -0.13141 |
| 1.172180975  | 0.484054 | 1.25964  |
| 0            | 0.928231 | 0.13393  |
| -0.316227345 | 0.808318 | -0.4543  |
| #DIV/0!      | 0.724378 | #DIV/0!  |
| -0.217153433 | 0.93947  | -0.10449 |
| -0.080918247 | 0.878231 | -0.2578  |
| -0.845338959 | 0.719007 | -0.3144  |
| -0.46509351  | 0.966315 | -0.01826 |

|              |          |          |
|--------------|----------|----------|
| -1.807354922 | 0.77359  | -0.46234 |
| 0.221561433  | 0.862932 | 0.3069   |
| 0.831915942  | 0.771506 | 0.64317  |
| 0.911221788  | 0.947532 | 0.14905  |
| -1.077685436 | 0.980276 | 0.03315  |
| -0.326016434 | 0.948574 | -0.09259 |
| -0.633430518 | 0.970128 | -0.0395  |
| -3.102538162 | 0.573256 | -0.96153 |
| -0.316157705 | 0.95988  | -0.05528 |
| 0.347790158  | 0.708602 | 0.46248  |
| -1.284746317 | 0.83614  | -0.30063 |
| 0.081997631  | 0.963221 | 0.09107  |
| -0.222133098 | 0.991629 | -0.01477 |
| 1.820676301  | 0.871922 | 0.52763  |
| -0.676424052 | 0.969554 | 0.0546   |
| -1           | 0.588047 | 0.80735  |
| -0.699474024 | 0.939927 | -0.12013 |
| -0.303164786 | 0.91442  | 0.15358  |
| -0.4949303   | 0.789792 | -0.43953 |
| 0.652076697  | 0.884936 | 0.28011  |
| -0.142231317 | 0.980224 | 0.03647  |
| -0.306175967 | 0.961265 | 0.07696  |
| -0.652550163 | 0.906177 | -0.14935 |
| -0.569842669 | 0.843783 | 0.17514  |
| -0.380778696 | 0.799286 | 0.23192  |
| -0.391183318 | 0.97888  | -0.03863 |
| -0.543589583 | 0.959711 | -0.05942 |
| -0.302280246 | 0.974651 | -0.04786 |
| -0.402508825 | 0.865633 | -0.28787 |
| -0.220768679 | 0.968369 | -0.06676 |
| -0.716939241 | 0.900831 | -0.09514 |
| -0.623991304 | 0.984447 | -0.01956 |
| -0.601892897 | 0.96105  | -0.05251 |
| -0.5840779   | 0.976019 | -0.03656 |
| -0.419000108 | 0.964589 | -0.07366 |
| -0.296758543 | 0.915989 | -0.20836 |
| -0.343618315 | 0.901521 | -0.22855 |
| -0.115517813 | 0.994039 | 0.01347  |
| -0.292254917 | 0.772059 | 0.25453  |
| -0.825447177 | 0.76985  | -0.17349 |
| -0.416043387 | 0.997263 | 0.0032   |
| -0.384526533 | 0.982493 | 0.03381  |
| -0.246002468 | 0.845144 | 0.20167  |
| -0.007129057 | 0.70006  | 0.35449  |
| -0.473895012 | 0.86887  | 0.10181  |
| -0.310371586 | 0.735316 | 0.26317  |
| -0.434108541 | 0.802642 | 0.17772  |
| -0.458052392 | 0.985501 | 0.01928  |
| -0.475734809 | 0.951081 | 0.04843  |
| -0.354490879 | 0.908756 | 0.08584  |
| -0.119720302 | 0.707502 | 0.34426  |
| -0.635530223 | 0.946816 | 0.05327  |
| -0.60475406  | 0.977574 | -0.03189 |
| -0.535669582 | 0.901952 | 0.11094  |
| -0.355808988 | 0.852978 | -0.26583 |
| -0.634409012 | 0.875937 | 0.06259  |

|              |          |          |
|--------------|----------|----------|
| -0.831360385 | 0.798282 | 0.15588  |
| -0.391766766 | 0.938843 | -0.12329 |
| -0.409568755 | 0.997448 | 0.00511  |
| -0.591055237 | 0.933898 | -0.13337 |
| -0.40214528  | 0.947136 | -0.11619 |
| -0.292942846 | 0.89281  | 0.1648   |
| -0.412610388 | 0.972189 | -0.04708 |
| -0.708666849 | 0.957656 | -0.05704 |
| -0.459743847 | 0.968624 | -0.05629 |
| -0.539592208 | 0.998648 | -0.00159 |
| -0.568109277 | 0.952203 | -0.08172 |
| -0.414361807 | 0.949844 | -0.08308 |
| -1.192374276 | 0.926658 | 0.12521  |
| -1.597244609 | 0.845732 | 0.26104  |
| 0.300455827  | 0.897222 | 0.20749  |
| -0.368796882 | 0.941823 | -0.11122 |
| -0.092859609 | 0.928232 | -0.12928 |
| 1.955177802  | 0.58682  | 1.20489  |
| -0.706772217 | 0.786155 | -0.4482  |
| -2.182864057 | 0.77678  | -0.50967 |
| -1.134880892 | 0.707493 | -0.58036 |
| -0.609440438 | 0.887682 | -0.25645 |
| -0.358368971 | 0.951042 | -0.09439 |
| -0.015824967 | 0.988137 | -0.02647 |
| -1.223084423 | 0.816634 | 0.29149  |
| -0.462329584 | 0.972982 | -0.04402 |
| -0.286006436 | 0.976311 | 0.04112  |
| -0.119713555 | 0.987782 | 0.02385  |
| -0.52928929  | 0.930415 | -0.13672 |
| 0.536990019  | 0.726558 | 0.55113  |
| -0.099251818 | 0.945691 | 0.08763  |
| -1.911943823 | 0.848637 | -0.28335 |
| -1.321928095 | 0.139326 | -2.32193 |
| -0.056874521 | 0.830577 | 0.31171  |
| -0.972385529 | 0.972104 | -0.03976 |
| -0.461698938 | 0.988438 | 0.02159  |
| -0.306103128 | 0.736027 | -0.67243 |
| -0.495651807 | 0.987585 | 0.01724  |
| -0.355733895 | 0.878891 | 0.15479  |
| -0.385783694 | 0.984174 | 0.02266  |
| -1.196247315 | 0.749553 | -0.53372 |
| -0.833429326 | 0.776304 | -0.45934 |
| -0.531429697 | 0.942145 | -0.09792 |
| -0.130786608 | 0.837966 | 0.26624  |
| -0.621956708 | 0.856015 | 0.10632  |
| -0.502688498 | 0.840902 | -0.34526 |
| 0.027605279  | 0.875941 | 0.26889  |
| -1.788296586 | 0.490121 | -1.19536 |
| 0.182341057  | 0.69663  | 0.59829  |
| -0.135684176 | 0.982726 | 0.03654  |
| -1.264415636 | 0.707317 | -0.71301 |
| -0.742692205 | 0.955139 | -0.09884 |
| -0.412053641 | 0.878249 | -0.22239 |
| -0.34122626  | 0.850729 | -0.27444 |
| 0.756180463  | 0.634713 | 0.7785   |
| -0.255263542 | 0.984577 | -0.03197 |

|              |          |          |
|--------------|----------|----------|
| -2.151768871 | 0.665432 | -0.63884 |
| 0.349149564  | 0.729855 | 0.59068  |
| -0.590301328 | 0.973194 | 0.02783  |
| -2.459431619 | 0.872889 | 0.24101  |
| -0.403496664 | 0.974708 | -0.02472 |
| -0.727686991 | 0.928839 | -0.12932 |
| -0.816455389 | 0.877188 | -0.14688 |
| 0.716874176  | 0.588948 | 0.61032  |
| 0.053287544  | 0.836204 | 0.22769  |
| -0.56945708  | 0.646189 | 0.62319  |
| 0.206051736  | 0.93527  | -0.15134 |
| -0.842741678 | 0.90158  | -0.11525 |
| -1.249506021 | 0.981548 | 0.02979  |
| -0.296965927 | 0.993024 | -0.01334 |
| -1.979040381 | 0.485553 | -1.48966 |
| 0.159481337  | 0.991991 | 0.02016  |
| -1.870458844 | 0.574376 | -0.88707 |
| 0.321928095  | 0.877389 | 0.32193  |
| -0.572233741 | 0.893192 | -0.17583 |
| -0.175442006 | 0.861224 | -0.22607 |
| -0.197036847 | 0.820134 | 0.42269  |
| -1.180948189 | 0.59735  | -0.96225 |
| -0.201751541 | 0.798702 | 0.26773  |
| -0.193823269 | 0.951137 | 0.11103  |
| -0.449802917 | 0.620336 | 0.58496  |
| -0.679012078 | 0.952133 | 0.03597  |
| -0.416598013 | 0.988231 | -0.02517 |
| 1.461023046  | 0.522466 | 1.9462   |
| -0.357523338 | 0.965697 | 0.04954  |
| 1            | 0.710482 | 1        |
| -0.105178017 | 0.930319 | 0.11991  |
| -0.307428525 | 0.769947 | 0.38187  |
| #DIV/0!      | 0.370757 | #DIV/0!  |
| #DIV/0!      | ?        | #DIV/0!  |
| -0.721917679 | 0.794434 | -0.487   |
| -58.40266987 | 0.308068 | -36.3683 |
| -0.403268594 | 0.975998 | -0.04562 |
| -0.074842925 | 0.977776 | 0.04016  |
| #DIV/0!      | 0.313562 | #DIV/0!  |
| -0.919538883 | 0.851971 | 0.34003  |
| 46.9237115   | 1        | -10.5782 |
| -0.198083629 | 0.917051 | -0.18336 |
| 0.1168813    | 0.855571 | 0.25591  |
| #NUM!        | 0.267527 | -58.7623 |
| -0.693260266 | 0.897801 | 0.17444  |
| -0.547487795 | 0.742448 | 0.37656  |
| -0.311585329 | 0.96338  | -0.07408 |
| -1.849320806 | 0.116866 | -0.93678 |
| -0.209453366 | 0.975703 | -0.05295 |
| -0.132307292 | 0.993358 | 0.0148   |
| -0.550205297 | 0.714928 | -0.61882 |
| -0.487665299 | 0.946162 | -0.11641 |
| -1.351472371 | 0.952514 | 0.09433  |
| -0.030446871 | 0.879305 | 0.17914  |
| -1           | 0.764931 | 0.58496  |
| 1.415037499  | 0.785812 | -0.58496 |

|              |          |          |
|--------------|----------|----------|
| -0.059378547 | 0.876501 | 0.18536  |
| -2.545812632 | 0.743782 | -0.43157 |
| 0.31410859   | 0.760225 | -0.81714 |
| -0.492076526 | 0.88764  | -0.24537 |
| -0.240324074 | 0.334694 | -49.1819 |
| #DIV/0!      | 0.450185 | #DIV/0!  |
| #DIV/0!      | 0.313562 | #DIV/0!  |
| 15.15544908  | 0.999816 | 3.02461  |
| -0.450312974 | 0.953326 | -0.0957  |
| -0.192643672 | 0.9555   | -0.1085  |
| -0.166210076 | 0.987253 | 0.02747  |
| 0.173589808  | 0.942917 | 0.13347  |
| -0.252884468 | 0.986918 | 0.02823  |
| -0.059531397 | 0.948986 | 0.05239  |
| -0.356757767 | 0.596273 | -0.41167 |
| -1           | 0.474021 | 1        |
| -0.72057644  | 0.934109 | -0.1002  |
| -0.761963422 | 0.841802 | -0.29979 |
| -0.263404518 | 0.985898 | -0.03118 |
| -0.509388847 | 0.971939 | 0.03677  |
| -0.058102955 | 0.955935 | 0.09192  |
| -0.358099237 | 0.945617 | -0.08609 |
| 0.449609081  | 0.929014 | 0.21249  |
| 0            | 0.450185 | #NUM!    |
| 2            | 0.663808 | 1.58496  |
| -1.31836148  | 0.996499 | 0.00712  |
| -0.251538767 | 0.772192 | 0.46467  |
| 109.7843049  | 0.392054 | 110.273  |
| 0.638213031  | 0.895766 | -0.1968  |
| -0.033947332 | 0.884118 | 0.21759  |
| #DIV/0!      | 0.450185 | #DIV/0!  |
| -0.304257069 | 0.955939 | -0.10535 |
| #DIV/0!      | 0.785812 | #DIV/0!  |
| 0            | 0.252216 | 1.58496  |
| -0.711898286 | 0.786489 | 0.10777  |
| 0.387925654  | 0.295509 | 0.94526  |
| -0.223693378 | 0.950888 | 0.08976  |
| 0.56486893   | 0.730135 | 0.48585  |
| #NUM!        | 0.592018 | -1.11349 |
| -1.151328071 | 0.920714 | 0.1022   |
| -0.385666781 | 0.974523 | -0.04606 |
| -1.072002074 | 0.481867 | -0.71168 |
| 0.259787127  | 0.975762 | 0.06413  |
| -0.168392147 | 0.878735 | -0.24921 |
| -0.710493383 | 0.807968 | 0.28951  |
| #DIV/0!      | 1        | #DIV/0!  |
| -2.031503205 | 0.570705 | -0.49502 |
| 0.226803972  | 0.987584 | -0.03083 |
| -1.341036918 | 0.444114 | -0.926   |
| -0.075148781 | 0.969329 | 0.06377  |
| -1.350323897 | 0.672602 | -0.4003  |
| -0.399426811 | 0.99134  | -0.01943 |
| -0.3693178   | 0.999859 | 0.00026  |
| -0.684070646 | 0.805477 | -0.39719 |
| -0.08059929  | 0.960238 | -0.05265 |
| 0.086812166  | 0.917693 | 0.15251  |



|              |          |          |
|--------------|----------|----------|
| #DIV/0!      | ?        | #DIV/0!  |
| -0.710493383 | 0.952983 | -0.08246 |
| -10.48611018 | 0.308068 | -92.5409 |
| -0.293762437 | 0.928769 | -0.11431 |
| #DIV/0!      | ?        | #DIV/0!  |
| -0.225236896 | 0.957525 | -0.09206 |
| -0.084942953 | 0.973734 | 0.04762  |
| -1.588572483 | 0.825267 | 0.41598  |
| -1.405834155 | 0.890696 | -0.22658 |
| #NUM!        | ?        | 45.0431  |
| -2.093877886 | 0.253323 | 0.85914  |
| -0.22702387  | 0.955984 | 0.06206  |
| 0.194572527  | 0.737324 | 0.56163  |
| -2.247927513 | 0.411079 | -0.66297 |
| -0.758229304 | 0.975371 | 0.03932  |
| -0.299560282 | 0.624168 | 0.39232  |
| -0.332000903 | 0.933782 | 0.14899  |
| 6.837515021  | 0.717143 | 5.25858  |
| #DIV/0!      | ?        | #DIV/0!  |
| #NUM!        | 0.308068 | #NUM!    |
| -1.513007313 | 0.427759 | -0.31991 |
| #DIV/0!      | ?        | #DIV/0!  |
| -0.84884331  | 0.877415 | -0.24872 |
| -0.493134922 | 0.989198 | -0.01546 |
| -0.846290585 | 0.965502 | -0.06103 |
| -3.336283388 | 0.450979 | -1.49632 |
| #NUM!        | 0.308068 | #NUM!    |
| -1.563783009 | 0.925834 | 0.15705  |
| -1           | 0.950111 | 0.08746  |
| 0.557995453  | 0.840222 | 0.33787  |
| 0.236989433  | 0.968016 | 0.07313  |
| -1.081114314 | 0.980406 | 0.04288  |
| -0.467332007 | 0.981512 | 0.03003  |
| -0.193191864 | 0.854802 | 0.236    |
| -0.781206309 | 0.866068 | -0.2445  |
| -0.905867348 | 0.881503 | 0.16008  |
| -0.16549003  | 0.789421 | -0.48543 |
| #NUM!        | ?        | 14.0799  |
| 0.436099115  | 0.751148 | 0.61298  |
| 0.485426827  | 0.895809 | -0.32193 |
| -0.144389909 | 0.94644  | -0.10692 |
| 0            | 0.450185 | #NUM!    |
| -0.296331441 | 0.803306 | -0.46146 |
| -0.534516264 | 0.814692 | -0.45596 |
| -0.241821504 | 0.751556 | 0.32146  |
| -0.222392421 | 0.91071  | -0.22239 |
| -55.90655969 | 0.3369   | 1.10795  |
| -0.639665719 | 0.964007 | -0.04725 |
| -0.224560258 | 0.988266 | 0.02576  |
| -0.071373583 | 0.889135 | 0.20321  |
| -0.456087549 | 0.85354  | -0.24331 |
| -2           | 0.881442 | 0.16993  |
| -0.394207004 | 0.910237 | -0.18989 |
| 0.584962501  | 1        | 0        |
| -0.857901396 | 0.84168  | -0.32998 |
| -0.080037254 | 0.997291 | 0.00571  |

|              |          |          |
|--------------|----------|----------|
| -2.476200056 | 0.983104 | -0.03017 |
| -2.191366446 | 0.590997 | -0.60581 |
| -0.84697256  | 0.586999 | -0.89112 |
| -0.433717782 | 0.694203 | 0.52603  |
| 0.107734452  | 0.93954  | -0.15424 |
| 1.565485126  | 0.93238  | 0.26442  |
| #DIV/0!      | 0        | #DIV/0!  |
| -0.474818728 | 0.995308 | -0.0089  |
| -1.117709213 | 0.919566 | -0.15387 |
| -0.493040011 | 0.721144 | -0.7885  |
| -0.797524169 | 0.89235  | -0.12288 |
| -1.584962501 | 1        | 0        |
| -0.133693788 | 0.900108 | -0.20551 |
| -0.911096964 | 0.749173 | 0.37899  |
| 18.42846379  | 0.989844 | 11.9013  |
| #DIV/0!      | 1        | #DIV/0!  |
| 0            | 0.308068 | #NUM!    |
| -0.377756483 | 0.912346 | 0.11431  |
| 0.585404642  | 0.846368 | 0.35841  |
| -2           | 1        | 0        |
| -1.923010261 | 0.26924  | -0.80255 |
| -0.633308638 | 0.957732 | 0.05059  |
| -0.609205437 | 0.94405  | 0.11165  |
| -0.267772847 | 0.900432 | 0.16958  |
| -0.751441496 | 0.834401 | 0.29581  |
| -34.95607033 | 0.473771 | 1.72265  |
| #DIV/0!      | ?        | #DIV/0!  |
| -0.13014751  | 0.952299 | 0.11086  |
| -0.12268252  | 0.876651 | 0.24241  |
| -0.768961346 | 0.997921 | -0.00229 |
| -0.584962501 | 0.542784 | 1.05889  |
| 0.894647     | 0.682419 | 0.59172  |
| -0.564642516 | 0.811344 | -0.42989 |
| -1.857980995 | 0.31656  | -1.39855 |
| -0.929610672 | 0.890606 | 0.21945  |
| -0.097168659 | 0.876168 | 0.2575   |
| -0.272906192 | 0.940951 | 0.10836  |
| #DIV/0!      | ?        | #DIV/0!  |
| 0            | 0.785812 | 0.58496  |
| #DIV/0!      | ?        | #DIV/0!  |
| 1.186413124  | 0.618102 | 0.71693  |
| -1.209453366 | 0.585118 | -0.5656  |
| -0.047955528 | 0.903168 | -0.22795 |
| -0.863780979 | 0.824079 | -0.18001 |
| -0.024476092 | 0.996058 | 0.00807  |
| -0.309715905 | 0.967711 | 0.0504   |
| -0.283335186 | 0.983901 | 0.03199  |
| -1.23596423  | 0.95724  | -0.06717 |
| 0.131698139  | 0.863975 | 0.37887  |
| 0.118437377  | 0.690844 | -1.05322 |
| -0.666150207 | 0.992972 | 0.01539  |
| 0.064461016  | 0.84975  | 0.30304  |
| -0.374165218 | 0.786442 | -0.47428 |
| -2.276850529 | 0.724365 | -0.31312 |
| -0.377851021 | 0.855664 | 0.17421  |
| -0.722378058 | 0.307283 | 0.32755  |

|              |          |          |
|--------------|----------|----------|
| #NUM!        | 0.308068 | #NUM!    |
| 0.313037786  | 0.830193 | 0.27285  |
| -0.051760499 | 0.977178 | -0.0558  |
| -0.519942709 | 0.777416 | -0.45773 |
| -0.302584737 | 0.989221 | -0.02549 |
| -1.501079253 | 0.485842 | -1.22492 |
| -0.383661567 | 0.913583 | -0.06717 |
| 0            | 0.651448 | 1        |
| -0.642496265 | 0.868039 | 0.12685  |
| -0.662038724 | 0.980755 | -0.03945 |
| -0.760122096 | 0.879556 | 0.1582   |
| -0.211504105 | 0.992172 | 0.0163   |
| -0.594181031 | 0.897512 | 0.14832  |
| -0.270451877 | 0.861294 | -0.31578 |
| -1.192645078 | 0.739226 | -0.67807 |
| -0.459641003 | 0.999511 | -0.00112 |
| 0.341556902  | 0.640222 | 0.48966  |
| -1.203531496 | 0.74735  | 0.55943  |
| -1.543460465 | 0.668423 | -0.60958 |
| 0.144389909  | 0.759201 | 0.61005  |
| -0.164758334 | 0.773259 | -0.56484 |
| #DIV/0!      | ?        | #DIV/0!  |
| -0.67595031  | 0.906057 | -0.1983  |
| -0.700439718 | 0.807148 | 0.44488  |
| 0.698579577  | 0.51305  | 1.63441  |
| -0.210196039 | 0.997314 | -0.00498 |
| -0.331536877 | 0.950594 | 0.11724  |
| -0.563305506 | 0.98232  | 0.01903  |
| -0.458831432 | 0.59662  | -1.09745 |
| -0.633931947 | 0.66996  | -0.7569  |
| -0.402098444 | 0.896772 | 0.18286  |
| -0.415037499 | 0.523243 | -2       |
| -1.053006493 | 0.920438 | 0.15449  |
| -1.133233504 | 0.874535 | 0.15973  |
| 0.162553013  | 0.945957 | 0.12663  |
| -0.503574941 | 0.936307 | -0.0929  |
| -0.35308172  | 0.936801 | 0.10003  |
| 2.332015763  | 0.367496 | 3.38362  |
| -0.733327017 | 0.850642 | -0.29486 |
| 2.321928095  | 0.706667 | 1.58496  |
| 0.459431619  | 0.844673 | 0.39232  |
| -0.090720204 | 0.714143 | 0.63496  |
| -0.506404113 | 0.871598 | -0.25701 |
| -2.95419631  | 0.43723  | -1.9542  |
| -0.503939041 | 0.988061 | -0.02369 |
| -0.558342245 | 0.952592 | -0.0991  |
| 0.222392421  | 0.430476 | 0.66297  |
| #DIV/0!      | 0.353387 | #DIV/0!  |
| -0.152003093 | 0.572485 | -1       |
| 0.147806595  | 0.997487 | -0.006   |
| #NUM!        | 0.622002 | 1        |
| -1           | 0.907467 | 0.22239  |
| -0.167904703 | 0.992007 | -0.01463 |
| -20.04834265 | ?        | -16.7838 |
| -0.518926742 | 0.963443 | 0.05703  |
| -0.203091865 | 0.943632 | 0.10535  |

|              |           |          |
|--------------|-----------|----------|
| -0.575427139 | 0.96027   | 0.0526   |
| #DIV/0!      | 1         | #DIV/0!  |
| -0.617867976 | 0.935934  | -0.14606 |
| #DIV/0!      | 1         | #DIV/0!  |
| -0.653423829 | 0.889589  | 0.16356  |
| 0.087462841  | 0.882053  | 0.24101  |
| -0.054584838 | 0.875936  | -0.20997 |
| #NUM!        | 0.308068  | #NUM!    |
| -0.875951502 | 0.942704  | 0.09448  |
| -0.222392421 | 0.902906  | 0.16521  |
| -0.115477217 | 0.906284  | -0.24101 |
| -0.230553742 | 0.881688  | -0.26748 |
| 1.033082355  | 0.768899  | 0.65275  |
| -1.314814545 | 0.311799  | -0.40025 |
| 1.091147888  | 0.877775  | 0.38333  |
| 0.241928773  | 0.767956  | 0.42696  |
| -0.468579927 | 0.968984  | -0.05473 |
| -0.584962501 | 0.5863    | -0.80735 |
| #NUM!        | 0.308068  | #NUM!    |
| -0.900464326 | 0.747216  | -0.48543 |
| -0.749079305 | 0.83131   | -0.42249 |
| 0.257133304  | 0.979303  | -0.05274 |
| -0.67074025  | 0.962286  | -0.02816 |
| 1.137503524  | 0.834007  | -0.73697 |
| -1.876851769 | 0.457429  | -0.66953 |
| -1.519374159 | 0.71518   | -0.72583 |
| -0.075333325 | 0.977186  | -0.04629 |
| -0.348469882 | 0.956948  | -0.09311 |
| -0.589095116 | 0.845939  | -0.35575 |
| -1.031884061 | 0.68676   | -0.52135 |
| -0.321928095 | 0.219102  | -2.32193 |
| -0.682294724 | 0.715476  | 0.39189  |
| -0.13492958  | 0.81638   | 0.30117  |
| -0.272587849 | 0.922728  | 0.15283  |
| -0.485426827 | 0.821423  | -0.48543 |
| -0.263034406 | 0.830864  | -0.41504 |
| -0.655385357 | 0.978452  | -0.02571 |
| -0.763102375 | 0.741537  | -0.45576 |
| -0.487637594 | 0.930603  | 0.1005   |
| -0.152003093 | 0.893157  | 0.22146  |
| -0.232582162 | 0.851012  | -0.3857  |
| -0.745139526 | 0.887151  | -0.23303 |
| -0.263034406 | 0.873634  | 0.22239  |
| 0.732536518  | 0.0606202 | 1.79367  |
| -0.467671134 | 0.9755    | 0.04233  |
| 0.049468676  | 0.88026   | -0.3388  |
| 0.777607579  | 0.844039  | 0.46566  |
| -1.065527534 | 0.924463  | 0.11975  |
| -1.049569923 | 0.763002  | -0.49257 |
| -1           | 0.764931  | 0.58496  |
| 0.91753784   | 0.909705  | 0.28951  |
| 0.023846742  | 0.792976  | 0.36923  |
| -0.629696524 | 0.699356  | -0.73042 |
| -35.60898399 | 0.783597  | -0.51319 |
| -0.25624098  | 0.889545  | -0.14875 |
| -1.469485283 | 0.415638  | -0.46949 |

|              |            |          |
|--------------|------------|----------|
| -1.124592825 | 0.79834    | -0.34989 |
| -1.033143124 | 0.310847   | -1.04272 |
| #DIV/0!      | ?          | #DIV/0!  |
| -1.119298928 | 0.831341   | -0.22239 |
| -2.321928095 | 0.553375   | -0.90689 |
| -1.229481846 | 0.74333    | -0.47275 |
| 0.303887553  | 0.813796   | 0.38451  |
| #DIV/0!      | 0.308068   | #DIV/0!  |
| -1.866733469 | 0.105599   | -1       |
| 1.584962501  | 0.363033   | 1.58496  |
| -0.085081501 | 0.956594   | -0.10545 |
| -1.868817024 | 0.782716   | -0.39489 |
| -1.762500686 | 0.931284   | -0.13523 |
| -0.12045969  | 0.979138   | 0.04169  |
| -0.549414922 | 0.785824   | 0.30112  |
| -0.348031431 | 0.9151     | 0.15331  |
| -0.480897279 | 0.862958   | -0.2907  |
| -0.340657662 | 0.988908   | 0.01111  |
| -0.435615633 | 0.920601   | 0.19203  |
| #DIV/0!      | ?          | #DIV/0!  |
| 0            | 0.252216   | 1.58496  |
| -0.136600509 | 0.821457   | 0.35812  |
| #DIV/0!      | 0.308068   | #DIV/0!  |
| #DIV/0!      | ?          | #DIV/0!  |
| -0.583753707 | 0.840266   | -0.34386 |
| -0.536057621 | 0.947053   | -0.06887 |
| -0.645603852 | 0.895447   | -0.23467 |
| -1.44715744  | 0.167728   | -0.81695 |
| -0.279497775 | 0.949905   | 0.10121  |
| -0.263034406 | 0.984202   | -0.02286 |
| -1.362570079 | 0.67124    | -0.848   |
| -1.874469118 | 0.546742   | -1.11366 |
| 0.736965594  | 0.132379   | 1.61667  |
| -0.599404013 | 0.915554   | -0.14605 |
| -1.233913096 | 0.953831   | 0.09096  |
| 0.158428767  | 0.74352    | 0.55296  |
| -0.584962501 | 0.685038   | 0.73697  |
| -0.628031223 | 0.869255   | -0.18057 |
| -0.046542586 | 0.900932   | -0.19592 |
| -0.106915204 | 0.868051   | 0.28011  |
| -1.318595739 | 0.612366   | -1.05362 |
| -0.239383138 | 0.966643   | -0.06088 |
| -1           | 0.785812   | 0.45943  |
| -0.130786608 | 0.840753   | 0.26036  |
| 0.121015401  | 0.884667   | -0.27753 |
| -0.195550809 | 0.853352   | -0.36839 |
| -0.272349904 | 0.941819   | 0.11342  |
| -0.729196865 | 0.867826   | 0.16672  |
| -0.330916878 | 0.962327   | -0.07353 |
| -0.824632913 | 0.806089   | -0.43149 |
| #DIV/0!      | 0.00700756 | #DIV/0!  |
| -0.227011161 | 0.993241   | -0.0139  |
| -1.205130813 | 0.579585   | -0.32823 |
| -1           | 0.353387   | #NUM!    |
| -0.472759299 | 0.99705    | -0.00535 |
| 0.315501826  | 1          | 0        |



|              |          |          |
|--------------|----------|----------|
| 0.485426827  | 0.761288 | 0.67807  |
| -0.343954401 | 1        | 0        |
| -0.584962501 | 0.764931 | -0.58496 |
| -2           | 0.518334 | 1.45943  |
| -0.500739794 | 0.963666 | -0.06425 |
| -0.230845452 | 0.932277 | 0.13263  |
| -0.240412079 | 0.91752  | 0.14228  |
| 1.584962501  | 0.724378 | #NUM!    |
| -0.507405977 | 0.944349 | -0.11711 |
| 0.662965013  | 0.784095 | -0.77761 |
| 1.137503524  | 0.972171 | -0.09954 |
| 0.584962501  | 0.764931 | -1       |
| #DIV/0!      | ?        | #DIV/0!  |
| -0.271483596 | 0.955594 | 0.08022  |
| -0.29650782  | 0.934109 | 0.11015  |
| #DIV/0!      | ?        | #DIV/0!  |
| -0.078988296 | 0.906585 | 0.18561  |
| #DIV/0!      | ?        | #DIV/0!  |
| -0.588468444 | 0.938504 | -0.12426 |
| 1            | 1        | 0        |
| -0.426732833 | 0.936921 | 0.1174   |
| -0.898120386 | 0.653384 | -0.89812 |
| -0.62861956  | 0.959763 | -0.08866 |
| #NUM!        | 0.308068 | -2.16993 |
| -0.246691556 | 0.891831 | -0.25031 |
| 1.299666823  | 0.85987  | 0.5627   |
| -0.262328112 | 0.924451 | 0.12087  |
| 0.043068722  | 0.979419 | 0.04307  |
| -0.333900737 | 0.873311 | 0.22069  |
| #DIV/0!      | ?        | #DIV/0!  |
| #DIV/0!      | ?        | #DIV/0!  |
| -1.016059851 | 0.630509 | 0.49905  |
| -2.572023445 | 0.639144 | -0.83249 |
| -0.233015336 | 0.981967 | -0.04199 |
| -0.266500402 | 0.998636 | -0.00307 |
| -0.584962501 | 0.860525 | -0.26303 |
| -3.321928095 | 0.295498 | -1.73697 |
| -0.414677674 | 0.919423 | -0.15394 |
| -0.732164608 | 0.828337 | -0.42663 |
| #NUM!        | 0.308068 | #NUM!    |
| #DIV/0!      | 1        | #DIV/0!  |
| -0.261119025 | 0.97897  | -0.04922 |
| -0.031276262 | 0.931613 | 0.13198  |
| #DIV/0!      | 1        | #DIV/0!  |
| 1            | 1        | 0        |
| -0.293145194 | 0.954185 | 0.0881   |
| 0.212824033  | 0.952513 | 0.11291  |
| -1.067846567 | 0.598983 | 0.62101  |
| -2.103921112 | 0.468369 | -0.86107 |
| #NUM!        | 0.308068 | #NUM!    |
| -0.59373938  | 0.65395  | 0.21879  |
| -1.584962501 | 0.572359 | 0.76553  |
| -0.351843673 | 0.962693 | -0.07174 |
| 0.189342455  | 0.830028 | 0.24236  |
| -0.222392421 | 0.80088  | 0.37851  |
| 0.378511623  | 0.417023 | 1.1375   |

|              |           |          |
|--------------|-----------|----------|
| -0.979822118 | 0.915967  | 0.14487  |
| -2.584962501 | 0.393741  | -2.58496 |
| -0.49786393  | 0.854452  | -0.29686 |
| 0.830074999  | 0.877672  | 0.28951  |
| -0.359773043 | 0.89603   | 0.1582   |
| -0.787221684 | 0.925688  | -0.16306 |
| -0.82608729  | 0.846479  | -0.27956 |
| -0.574702404 | 0.790774  | 0.16811  |
| -0.140743976 | 0.997113  | 0.00462  |
| -1.189413644 | 0.412933  | -1.16387 |
| #DIV/0!      | ?         | #DIV/0!  |
| 0.136935645  | 0.992435  | -0.01886 |
| -0.130668952 | 0.872043  | -0.28906 |
| #NUM!        | 0.308068  | #NUM!    |
| -1           | 1         | 0        |
| -2.357552005 | 0.702361  | -0.5502  |
| -0.451294871 | 0.932548  | -0.14988 |
| 2.355480655  | 0.741125  | 1        |
| #DIV/0!      | 0.329316  | #DIV/0!  |
| -1.878009476 | 0.775515  | 0.44392  |
| -0.233517359 | 0.864104  | -0.29152 |
| #DIV/0!      | 1         | #DIV/0!  |
| #DIV/0!      | 0.308068  | #DIV/0!  |
| 0.332575339  | 0.898775  | 0.24511  |
| 0.012600037  | 0.913641  | 0.14111  |
| -0.240539768 | 0.806251  | 0.21353  |
| -0.038582462 | 0.700909  | 0.62579  |
| 3.646489663  | 0.475279  | 3.23834  |
| -0.437740775 | 0.904607  | -0.22001 |
| -1           | 0.866773  | 0.32193  |
| -2.115477217 | 0.708395  | -0.58496 |
| -0.394214568 | 0.807459  | -0.3129  |
| -0.559427409 | 0.833535  | 0.28011  |
| -0.267347399 | 0.973181  | 0.04939  |
| -0.483289035 | 0.814765  | 0.10704  |
| -0.085667689 | 0.92744   | -0.16668 |
| 0.856981691  | 0.977842  | 0.0679   |
| 0.342392197  | 0.712483  | 0.7318   |
| -0.056927068 | 0.990594  | 0.02131  |
| 0            | 1         | 0        |
| -0.621193518 | 0.973533  | -0.04017 |
| -1.222392421 | 0.651448  | -0.80735 |
| -0.578862301 | 0.897737  | -0.19614 |
| #NUM!        | 0.308068  | #NUM!    |
| #DIV/0!      | 0.353387  | #DIV/0!  |
| -0.244583554 | 0.753057  | 0.30901  |
| -0.584962501 | 0.919687  | -0.16993 |
| #DIV/0!      | ?         | #DIV/0!  |
| -2.321928095 | 0.862169  | -0.32193 |
| -0.300095962 | 0.985844  | 0.02893  |
| -2.124743302 | 0.0893366 | -1.31243 |
| -0.628031223 | 0.858433  | 0.23447  |
| -1.356726832 | 0.897915  | 0.21072  |
| -0.584962501 | 0.847705  | 0.09686  |
| -0.152003093 | 0.611696  | -1.152   |
| 1.459431619  | 0.864145  | 0.58496  |



|              |          |          |
|--------------|----------|----------|
| -0.321928095 | 0.916573 | 0.12286  |
| #DIV/0!      | ?        | #DIV/0!  |
| -0.31676639  | 0.912901 | -0.19634 |
| 1            | 0.756486 | 0.41504  |
| 0.508470989  | 0.858539 | 0.35683  |
| -0.928382406 | 0.808611 | 0.22159  |
| -0.528347694 | 0.994777 | -0.00489 |
| -0.691753017 | 0.9793   | -0.04277 |
| #DIV/0!      | ?        | #DIV/0!  |
| -0.225660135 | 0.970513 | -0.0668  |
| -1.145462869 | 0.37992  | 2.67729  |
| -0.287802311 | 0.975572 | 0.05089  |
| #DIV/0!      | ?        | #DIV/0!  |
| -1.485426827 | 0.56435  | -1.10692 |
| -0.403355694 | 0.927607 | -0.10962 |
| -1.051024003 | 0.622186 | -0.7912  |
| -1.624490865 | 0.661401 | -0.7176  |
| -0.726385494 | 0.912526 | 0.13773  |
| -0.512408448 | 0.994419 | -0.00755 |
| #NUM!        | 0.622002 | 1        |
| -1.222392421 | 0.591677 | -1.22239 |
| #NUM!        | 0.308068 | #NUM!    |
| -0.263034406 | 0.889735 | -0.26303 |
| -0.261497374 | 0.390848 | 2.57028  |
| -0.600478571 | 0.245745 | 0.58884  |
| #DIV/0!      | ?        | #DIV/0!  |
| -0.677449443 | 0.55006  | 0.92497  |
| -1           | 0.353387 | #NUM!    |
| #DIV/0!      | ?        | #DIV/0!  |
| 10.37268544  | 0.308068 | 78.0503  |
| 0.326650505  | 0.843362 | 0.34539  |
| 0.717600269  | 0.903954 | 0.24511  |
| -0.411020633 | 0.903358 | 0.10758  |
| -0.485426827 | 0.457806 | 0.65208  |
| -2.321928095 | 0.862169 | -0.32193 |
| -0.392914688 | 0.933291 | 0.13663  |
| -0.990304008 | 0.769067 | -0.53496 |
| 1            | 0.622002 | #NUM!    |
| 0.099535674  | 0.738946 | 0.58496  |
| -0.516251586 | 0.949879 | 0.07286  |
| 0.584962501  | 0.764931 | 0.58496  |
| -1.192645078 | 0.832033 | 0.32193  |
| #NUM!        | 0.034897 | #NUM!    |
| -0.205539697 | 0.863494 | -0.15373 |
| -1           | 0.787312 | 0.41504  |
| -1.218640286 | 0.862505 | -0.12964 |
| -1.378511623 | 0.392404 | -1.11548 |
| -0.45558929  | 0.922558 | -0.11324 |
| -1.636863603 | 0.998746 | -0.0017  |
| -0.158461565 | 0.84448  | 0.27692  |
| #DIV/0!      | ?        | #DIV/0!  |
| -0.342601663 | 0.983428 | 0.03477  |
| 0.037661674  | 0.931172 | 0.12039  |
| #DIV/0!      | ?        | #DIV/0!  |
| -0.46428376  | 0.992231 | -0.01481 |
| -1           | 1        | 0        |

|              |          |          |
|--------------|----------|----------|
| -0.333608038 | 0.952234 | -0.09621 |
| -1.139857664 | 0.630963 | -0.70338 |
| #DIV/0!      | ?        | #DIV/0!  |
| -0.973240356 | 0.898466 | -0.22751 |
| -0.251244685 | 0.929491 | 0.09607  |
| -0.432959407 | 0.861802 | -0.31748 |
| -1.290677161 | 0.80379  | -0.34314 |
| -5.944527459 | 0.488494 | -1.61356 |
| 0.457761081  | 0.982317 | 0.04421  |
| #DIV/0!      | 1        | #DIV/0!  |
| -0.78191292  | 0.922949 | 0.14125  |
| -0.324536031 | 0.93787  | -0.12325 |
| 0.191911815  | 0.952191 | -0.12234 |
| 4.210917256  | 0.337325 | 5.55563  |
| -0.460856069 | 0.942185 | 0.11144  |
| -0.463400521 | 0.992663 | -0.01594 |
| 0.432959407  | 0.973413 | -0.074   |
| -0.634769218 | 0.797384 | -0.15093 |
| -0.169533224 | 0.919462 | 0.17418  |
| 1            | 0.368573 | 2        |
| 0.029747343  | 0.977328 | -0.0614  |
| -0.277337944 | 0.980669 | -0.03935 |
| -0.718626003 | 0.931633 | 0.12374  |
| -0.94753258  | 0.644939 | -0.94753 |
| -0.258801758 | 0.83234  | -0.23442 |
| 0.107211353  | 0.959331 | -0.09007 |
| 1.357812631  | 0.691903 | 1.02122  |
| -1.186413124 | 0.567857 | -1.0902  |
| -0.701843801 | 0.670572 | -0.7577  |
| #DIV/0!      | ?        | #DIV/0!  |
| #DIV/0!      | ?        | #DIV/0!  |
| -0.428843299 | 0.955893 | -0.09115 |
| 1.584962501  | 0.632221 | 1.16993  |
| #DIV/0!      | ?        | #DIV/0!  |
| -0.965767415 | 0.615439 | -0.22926 |
| -0.332787286 | 0.89814  | 0.05749  |
| 0.112419579  | 0.919483 | 0.16845  |
| 0.263034406  | 0.548254 | 0.95109  |
| -2           | 0.974114 | 0.04439  |
| -0.506230065 | 0.933872 | 0.11073  |
| 0.289506617  | 0.939116 | -0.16993 |
| -1.699514617 | 0.58329  | -0.92166 |
| -0.381090167 | 0.970742 | -0.05247 |
| -0.31173089  | 0.998183 | -0.0036  |
| -1.031842216 | 0.829915 | -0.07582 |
| -1.584962501 | 0.513713 | -1.58496 |
| #DIV/0!      | ?        | #DIV/0!  |
| -2.087462841 | 0.350558 | -3.72489 |
| -0.551795637 | 0.940584 | -0.11641 |
| -0.584962501 | 0.722932 | 0.58496  |
| -1.04580369  | 1        | 0        |
| 0.415037499  | 0.834708 | -0.58496 |
| -0.906890596 | 0.738625 | -0.63387 |
| -0.024868341 | 0.712017 | 0.3957   |
| #NUM!        | 0.308068 | #NUM!    |
| -0.476028129 | 0.599751 | -1.25739 |

|              |          |          |
|--------------|----------|----------|
| 0.372505315  | 0.860448 | 0.3224   |
| -0.254317189 | 1        | 0        |
| -0.231830906 | 0.943462 | -0.13022 |
| #DIV/0!      | ?        | #DIV/0!  |
| #DIV/0!      | ?        | #DIV/0!  |
| #DIV/0!      | ?        | #DIV/0!  |
| #DIV/0!      | 0.785812 | #DIV/0!  |
| -0.093866923 | 0.887927 | -0.30218 |
| -1.878693704 | 0.754264 | -0.4235  |
| -0.483815777 | 0.90788  | 0.12055  |
| #DIV/0!      | ?        | #DIV/0!  |
| 1            | 0.763196 | -1.36317 |
| #NUM!        | 1        | 0        |
| #NUM!        | 0.308068 | -56.6821 |
| -0.375467962 | 0.887207 | -0.267   |
| #NUM!        | 0.308068 | #NUM!    |
| #DIV/0!      | 0.308068 | #DIV/0!  |
| #NUM!        | 0.204795 | -18.9499 |
| #NUM!        | 0.308068 | #NUM!    |
| -0.592128801 | 0.679292 | -0.69001 |
| -0.757697036 | 0.719254 | -0.52989 |
| #DIV/0!      | ?        | #DIV/0!  |
| -0.342194906 | 0.976871 | 0.04812  |
| #NUM!        | 0.756486 | 0.58496  |
| 0.222392421  | 0.982869 | 0.04307  |
| -1.412914208 | 0.953654 | -0.07789 |
| -0.430350555 | 0.96269  | -0.07366 |
| -0.577142996 | 0.862087 | -0.23201 |
| -0.387023123 | 1        | 0        |
| 2            | 0.462019 | 2.58496  |
| -0.756299595 | 0.895082 | -0.1966  |
| -0.742503778 | 0.787423 | -0.48875 |
| -1.368244184 | 0.430614 | -2.3815  |
| -0.696795533 | 0.81177  | -0.16215 |
| -0.17630514  | 0.848142 | -0.3278  |
| #DIV/0!      | ?        | #DIV/0!  |
| -0.096215315 | 0.91101  | -0.19931 |
| #NUM!        | 0.622002 | 1        |
| -0.807354922 | 0.60537  | 1.09954  |
| -3.169925001 | 1        | 0        |
| -0.426264755 | 0.97897  | -0.04083 |
| -0.319273795 | 0.995476 | -0.0089  |
| -0.384293976 | 0.880381 | -0.28901 |
| -0.362570079 | 0.720252 | -0.848   |
| #NUM!        | 0.308068 | #NUM!    |
| #DIV/0!      | ?        | #DIV/0!  |
| 0.186413124  | 0.721954 | 0.53004  |
| -0.716207034 | 0.744789 | -0.52356 |
| #DIV/0!      | 0.308068 | #DIV/0!  |
| -2.146841388 | 0.532882 | -1.14684 |
| -0.874469118 | 0.747458 | 0.54057  |
| #DIV/0!      | 0.308068 | #DIV/0!  |
| #DIV/0!      | 0.450185 | #DIV/0!  |
| -0.566398762 | 0.892012 | -0.23551 |
| #DIV/0!      | 1        | #DIV/0!  |
| -0.259908305 | 0.937479 | -0.14472 |

|              |          |          |
|--------------|----------|----------|
| -0.362241258 | 0.836253 | 0.25832  |
| #DIV/0!      | ?        | #DIV/0!  |
| -0.339695223 | 0.881704 | 0.19714  |
| 0.345135486  | 0.886538 | 0.17425  |
| #DIV/0!      | ?        | #DIV/0!  |
| 0.59542444   | 0.762869 | 0.44002  |
| 1.321928095  | 1        | 0        |
| -0.371828047 | 0.777024 | 0.19861  |
| -1.829212649 | 0.955609 | 0.08364  |
| -0.667424661 | 0.943344 | -0.09668 |
| 0.387023123  | 1        | 0        |
| -1           | 0.869939 | -0.32193 |
| -0.234644682 | 0.857861 | 0.1587   |
| -0.14822993  | 0.827915 | 0.27954  |
| #DIV/0!      | 0.308068 | #DIV/0!  |
| -0.786184863 | 0.758593 | -0.51843 |
| #DIV/0!      | ?        | #DIV/0!  |
| -0.161711181 | 0.962436 | 0.08233  |
| -0.622366342 | 0.917137 | -0.13468 |
| 2            | 0.710482 | 1        |
| #DIV/0!      | ?        | #DIV/0!  |
| 1.233752284  | 0.845527 | 0.52083  |
| -1.584962501 | 0.568955 | 1.22239  |
| 0.136778733  | 0.884783 | 0.24162  |
| #NUM!        | 0.622002 | -1       |
| -0.968658457 | 0.686491 | 0.52736  |
| 0            | 0.611386 | 0.71049  |
| 0            | 0.706667 | -0.73697 |
| -0.588418059 | 0.722445 | 0.4874   |
| -0.826891351 | 0.830748 | 0.15514  |
| -0.332062778 | 0.962093 | 0.07635  |
| 0.078002512  | 0.842114 | -0.46949 |
| -0.696607857 | 0.924241 | -0.16227 |
| 0            | 0.450185 | 2        |
| #NUM!        | 0.308068 | #NUM!    |
| -1.080919995 | 0.530681 | -0.87447 |
| -0.231564067 | 0.793689 | -0.50754 |
| -1.736965594 | 0.788871 | -0.44746 |
| -0.852404609 | 0.85863  | -0.3137  |
| -0.024169166 | 0.929719 | -0.18251 |
| #DIV/0!      | 1        | #DIV/0!  |
| -0.368644594 | 0.995286 | 0.0094   |
| 23.75032032  | 0.320441 | 25.7391  |
| 0.420843121  | 0.758834 | 0.5536   |
| -0.047305715 | 0.853971 | -0.43063 |
| -0.29005758  | 0.815231 | -0.44004 |
| #DIV/0!      | 0.450185 | #DIV/0!  |
| 0.790546634  | 0.341719 | 1.46297  |
| -0.584962501 | 0.708593 | -0.848   |
| #DIV/0!      | ?        | #DIV/0!  |
| -0.575785854 | 0.655218 | -0.77329 |
| -0.881357564 | 0.811389 | -0.42885 |
| -0.567856597 | 0.853552 | 0.24503  |
| 2.99095486   | 0.993818 | 0.07039  |
| #DIV/0!      | ?        | #DIV/0!  |
| -1.415037499 | 0.71213  | -0.67807 |

|              |            |          |
|--------------|------------|----------|
| #NUM!        | 1          | 0        |
| 1.736965594  | 0.570656   | 1.58496  |
| 0.897507589  | 0.73841    | 0.63447  |
| 0.421869533  | 0.940559   | -0.14391 |
| 8.34168469   | 0.00497319 | 8.1283   |
| #DIV/0!      | ?          | #DIV/0!  |
| -0.376369709 | 0.963777   | 0.06462  |
| -0.486741151 | 0.963322   | -0.06483 |
| 0            | 0.613399   | -1.58496 |
| 1            | 0.622002   | #NUM!    |
| -0.451998988 | 0.871002   | -0.21244 |
| -2.438573014 | 0.296505   | -4.10154 |
| #DIV/0!      | 0.375133   | #DIV/0!  |
| -0.255013525 | 0.993283   | 0.01182  |
| #DIV/0!      | 0.308068   | #DIV/0!  |
| #DIV/0!      | ?          | #DIV/0!  |
| -0.114850095 | 0.954531   | -0.09462 |
| -0.936908897 | 0.905832   | -0.07192 |
| -0.330148602 | 0.828267   | 0.21299  |
| -2.124687768 | 0.957271   | -0.07977 |
| -0.722264545 | 0.923231   | 0.15281  |
| #DIV/0!      | ?          | #DIV/0!  |
| #DIV/0!      | ?          | #DIV/0!  |
| -1.186169609 | 0.431647   | -2.38228 |
| #DIV/0!      | ?          | #DIV/0!  |
| -1.546387093 | 0.731967   | -0.54011 |
| -0.840877495 | 0.907309   | -0.17887 |
| #DIV/0!      | ?          | #DIV/0!  |
| 0.996461958  | 0.499811   | 1.2713   |
| -1.423711634 | 0.920678   | 0.15833  |
| -0.736965594 | 0.409302   | 0.48543  |
| 0.415037499  | 0.538238   | 1.22239  |
| 0.294811967  | 0.699727   | 0.54491  |
| -0.304854582 | 0.992056   | -0.01728 |
| #DIV/0!      | ?          | #DIV/0!  |
| -0.455916127 | 0.914682   | 0.10538  |
| -0.590109639 | 0.903924   | 0.15222  |
| -0.224706287 | 1          | 0        |
| #NUM!        | 0.308068   | #NUM!    |
| -1.029062466 | 0.738303   | -0.43852 |
| 0.02119381   | 0.975454   | 0.04232  |
| -0.569565396 | 0.901518   | 0.11309  |
| -0.155508684 | 0.846712   | 0.21276  |
| #NUM!        | 0.308068   | #NUM!    |
| -1.436314687 | 0.969967   | -0.07037 |
| -0.062710025 | 0.971194   | 0.0684   |
| 0.220125814  | 0.982182   | 0.04679  |
| -2.169925001 | 0.0576689  | -1.58496 |
| 2.746195539  | 0.604352   | 2.30969  |
| -1.151295887 | 0.498988   | 0.98269  |
| #DIV/0!      | ?          | #DIV/0!  |
| -0.125530882 | 1          | 0        |
| #DIV/0!      | ?          | #DIV/0!  |
| 0.052151282  | 0.959628   | 0.07754  |
| 0.074708513  | 0.9639     | -0.08763 |
| -0.285766827 | 0.97932    | 0.03141  |

|              |          |          |
|--------------|----------|----------|
| #NUM!        | 0.308068 | -101.738 |
| -0.386605305 | 0.969435 | 0.06004  |
| 0.670987071  | 0.940738 | 0.1879   |
| -0.584962501 | 0.785812 | -0.58496 |
| -0.146455125 | 0.855517 | 0.24329  |
| 0.624490865  | 0.875416 | -0.45568 |
| -0.312479031 | 0.876011 | 0.18118  |
| -0.98140739  | 0.980268 | -0.03589 |
| 2.584962501  | 0.648511 | 2        |
| 16.56956398  | 0.470077 | 16.4123  |
| -1.362570079 | 0.829031 | -0.36257 |
| -0.497618689 | 0.691803 | 0.28435  |
| 0.484657595  | 0.983734 | -0.03818 |
| 0.404007586  | 0.795094 | 0.38414  |
| -0.698814756 | 0.618493 | -0.99879 |
| -0.164938149 | 0.959161 | -0.09071 |
| -0.626782676 | 0.925942 | -0.05603 |
| 0.206450877  | 0.614304 | -1.11548 |
| -0.584962501 | 0.834708 | 0.41504  |
| -0.580647171 | 0.820696 | 0.20776  |
| #NUM!        | 0.308068 | #NUM!    |
| #NUM!        | 0.394951 | 1.24793  |
| #DIV/0!      | ?        | #DIV/0!  |
| -0.242833459 | 0.902589 | -0.21848 |
| -0.740613371 | 0.765316 | -0.52083 |
| #DIV/0!      | ?        | #DIV/0!  |
| -0.645508885 | 0.984212 | 0.01725  |
| 1.793549123  | 0.769654 | 0.8657   |
| #NUM!        | ?        | 16.5968  |
| 0            | 0.834708 | 0.32193  |
| #DIV/0!      | 0.308068 | #DIV/0!  |
| -10.05819753 | 0.337628 | -1.29952 |
| 0.290378676  | 0.431316 | 0.70312  |
| -0.855264907 | 0.804218 | -0.40781 |
| -0.115477217 | 0.677503 | -1.11548 |
| -0.71179277  | 0.572552 | 0.4101   |
| -0.370062281 | 0.994863 | -0.00699 |
| 0            | 0.450185 | #NUM!    |
| -1.142776324 | 0.721668 | -0.59477 |
| -1.321928095 | 0.228778 | -1.58496 |
| -3.874469118 | 0.568514 | -0.55254 |
| -0.137503524 | 0.820736 | -0.45943 |
| -1.035982216 | 0.930313 | -0.06354 |
| -1.03562391  | 0.916142 | -0.18763 |
| #DIV/0!      | 0.450185 | #DIV/0!  |
| -1.632268215 | 0.431126 | -2.04731 |
| 0.068452714  | 0.893453 | 0.2544   |
| -0.74163074  | 0.987385 | -0.02822 |
| -1.064130337 | 0.669174 | -0.52356 |
| -0.18478296  | 0.892253 | 0.19166  |
| 0.880662247  | 0.572348 | 1.46931  |
| 0            | 0.450185 | #NUM!    |
| -0.173656978 | 0.911867 | -0.19888 |
| -0.416564969 | 0.868385 | -0.30769 |
| #DIV/0!      | 0.308068 | #DIV/0!  |
| -0.731577578 | 0.904683 | -0.22285 |

|              |           |          |
|--------------|-----------|----------|
| -0.914270126 | 0.456853  | -0.52725 |
| -1.491853096 | 0.449121  | -1.09954 |
| #DIV/0!      | 1         | #DIV/0!  |
| -0.551015169 | 0.826043  | -0.3744  |
| #DIV/0!      | ?         | #DIV/0!  |
| 9.131152267  | ?         | 18.4247  |
| -0.314619743 | 0.879978  | 0.14969  |
| #DIV/0!      | ?         | #DIV/0!  |
| -2.43649521  | 0.644117  | -0.60175 |
| -0.492722475 | 0.908044  | -0.12453 |
| -0.615515424 | 0.952689  | -0.0451  |
| -1.011090981 | 0.849012  | -0.2203  |
| #NUM!        | 1         | 0        |
| #DIV/0!      | 0.333852  | #DIV/0!  |
| #DIV/0!      | 0.308068  | #DIV/0!  |
| #NUM!        | 0.308068  | -46.0011 |
| #DIV/0!      | ?         | #DIV/0!  |
| -0.309556521 | 0.897126  | 0.19808  |
| -0.763565064 | 0.830824  | 0.14449  |
| -1.245007055 | 0.744881  | -0.29508 |
| -0.0885897   | 0.935174  | 0.17043  |
| -0.162367449 | 0.995964  | 0.00539  |
| #DIV/0!      | ?         | #DIV/0!  |
| #DIV/0!      | 1         | #DIV/0!  |
| 0.479167837  | 0.717051  | 0.81359  |
| -0.226770862 | 0.903014  | 0.21864  |
| 0.664132714  | 0.563401  | 0.73697  |
| 1.071412806  | 0.83358   | 0.55739  |
| 0.341724871  | 0.930696  | 0.17412  |
| 0.038474148  | 0.770681  | -0.68589 |
| #DIV/0!      | ?         | #DIV/0!  |
| 17.89262495  | ?         | #NUM!    |
| #DIV/0!      | ?         | #DIV/0!  |
| 0.973527789  | 0.73463   | 0.61096  |
| -0.502500341 | 0.686187  | -0.5025  |
| -59.21593947 | 0.494676  | -1.58709 |
| 0.736965594  | 0.837425  | -0.58496 |
| #NUM!        | 0.622002  | -1       |
| #DIV/0!      | ?         | #DIV/0!  |
| #NUM!        | 1         | 0        |
| 0.130524401  | 0.832278  | 0.33142  |
| -0.090769097 | 0.951562  | 0.11005  |
| -0.58674735  | 0.958172  | -0.0952  |
| -1.039528364 | 0.631616  | 0.9301   |
| 8.41781483   | 0.0181497 | 10.6196  |
| -0.457321489 | 0.976378  | -0.03765 |
| #DIV/0!      | 0.308068  | #DIV/0!  |
| 1            | 0.710482  | 1        |
| -0.343260297 | 0.984874  | 0.02478  |
| -0.701938715 | 0.324161  | 0.25053  |
| -0.28871471  | 0.888917  | -0.28222 |
| -0.49777967  | 0.974419  | -0.02942 |
| 0.746243408  | 0.964287  | 0.10758  |
| -1           | 0.474021  | 1        |
| -0.459295316 | 0.955192  | -0.08234 |
| -2.169925001 | 0.3646    | -1.16993 |

|              |          |          |
|--------------|----------|----------|
| 0.745386603  | 0.943832 | 0.1422   |
| -0.346418614 | 0.965087 | -0.0549  |
| 0.998483696  | 0.750775 | 0.76324  |
| -0.422119744 | 0.999943 | 0.00011  |
| -0.973087985 | 0.868122 | -0.26623 |
| -0.40463509  | 0.908572 | 0.14923  |
| #NUM!        | 0.308068 | #NUM!    |
| -0.313483375 | 0.798209 | 0.39912  |
| #DIV/0!      | ?        | #DIV/0!  |
| -0.565123754 | 0.884227 | 0.21157  |
| 0.033288105  | 0.974944 | -0.06164 |
| 2.209630764  | 0.801957 | 1.11343  |
| 0.498914148  | 0.471214 | 0.99867  |
| -0.425114572 | 0.689965 | 0.30645  |
| -0.591360785 | 0.389828 | -5.84715 |
| -1.060499647 | 0.432822 | -1.58535 |
| -0.452512205 | 0.921104 | 0.15754  |
| -0.567269938 | 0.91571  | 0.08418  |
| -0.540190759 | 0.783844 | -0.51057 |
| -0.731033172 | 0.782633 | 0.1485   |
| 0.301722448  | 0.937694 | -0.11498 |
| #NUM!        | 0.308068 | #NUM!    |
| #DIV/0!      | 0.450185 | #DIV/0!  |
| -0.094026577 | 0.952686 | -0.09403 |
| -1.072011245 | 0.848505 | 0.29686  |
| -0.456413807 | 0.953142 | 0.05568  |
| 0.365540169  | 0.976354 | -0.07337 |
| -0.200015912 | 0.346471 | -29.3196 |
| -0.028159141 | 0.864327 | -0.35735 |
| -0.535596423 | 0.641782 | 0.34296  |
| 0.135115936  | 0.795108 | 0.34206  |
| 0.089580593  | 0.780404 | 0.42557  |
| -0.723751578 | 0.86728  | -0.28974 |
| -0.378738583 | 0.768308 | 0.27017  |
| -0.673843782 | 0.930296 | -0.14296 |
| #DIV/0!      | 1        | #DIV/0!  |
| #DIV/0!      | 1        | #DIV/0!  |
| #DIV/0!      | ?        | #DIV/0!  |
| -0.420986766 | 0.811432 | -0.48187 |
| -1.207595419 | 0.785111 | -0.47063 |
| #DIV/0!      | 0.622582 | #DIV/0!  |
| 0.129111068  | 0.891772 | 0.17722  |
| -0.312722636 | 0.914289 | 0.12382  |
| -0.21041074  | 0.884971 | 0.20178  |
| -0.034765418 | 0.92105  | 0.13124  |
| 0.043068722  | 0.871803 | 0.18442  |
| #DIV/0!      | ?        | #DIV/0!  |
| 2.459431619  | 0.922417 | 0.58496  |
| -0.695256858 | 0.845755 | 0.11124  |
| 0.255802353  | 0.751482 | 0.26468  |
| -1.322812693 | 0.351826 | -1.04438 |
| -0.339641753 | 0.945839 | 0.09485  |
| -0.627032168 | 0.922299 | 0.03944  |
| -0.900401677 | 0.420609 | -0.59102 |
| -0.187278568 | 0.938044 | 0.13179  |
| -0.409150837 | 0.947034 | 0.11584  |



|              |           |          |
|--------------|-----------|----------|
| -0.192344639 | 0.975445  | -0.05041 |
| 0.198170584  | 0.786676  | 0.48545  |
| -0.664815808 | 0.844841  | -0.31156 |
| #DIV/0!      | ?         | #DIV/0!  |
| -4.635011855 | 0.681901  | -0.80059 |
| 0.843813663  | 0.877177  | 0.32662  |
| -0.371968777 | 0.913722  | 0.18442  |
| -0.140862536 | 0.730465  | 0.52793  |
| -0.574866623 | 0.917276  | 0.14173  |
| -0.370748223 | 0.978687  | 0.03486  |
| -0.31374713  | 0.908784  | -0.18884 |
| -0.119468975 | 0.665711  | 0.40641  |
| -0.074000581 | 0.965235  | -0.074   |
| -13.00598137 | 0.308068  | 37.6352  |
| -0.362355114 | 0.711754  | -0.84303 |
| #DIV/0!      | 1         | #DIV/0!  |
| -0.477708268 | 0.960655  | 0.06397  |
| -58.85157243 | 0.0619034 | 2.00782  |
| -0.502876921 | 0.916792  | -0.19117 |
| -0.195823442 | 0.902086  | -0.20566 |
| -0.01071633  | 0.448664  | -29.0219 |
| #DIV/0!      | ?         | #DIV/0!  |
| -3.558025251 | 0.763653  | -0.3195  |
| -0.004403287 | 0.507668  | 0.42214  |
| -0.020231985 | 0.913551  | 0.10006  |
| 0.210566986  | 0.757168  | 0.6389   |
| -2.310159501 | 0.906741  | -0.16869 |
| -0.389505576 | 0.995355  | -0.01056 |
| -0.05246742  | 0.951899  | 0.10912  |
| #NUM!        | 0.518269  | 1.45219  |
| -0.494764692 | 0.886479  | 0.18876  |
| -1.102051271 | 0.909247  | 0.09448  |
| 1            | 0.622002  | -1       |
| #DIV/0!      | ?         | #DIV/0!  |
| -0.750021747 | 0.73812   | -0.42809 |
| -0.230293678 | 0.987242  | 0.01794  |
| 0            | 0.785812  | 0.45943  |
| -0.64073894  | 0.900157  | -0.19872 |
| 0.311347423  | 0.718887  | 0.70363  |
| -25.54984494 | 0.0782468 | -26.6143 |
| -0.274022235 | 0.945631  | 0.08088  |
| 0.483082887  | 0.758977  | 0.43539  |
| 0.266275099  | 0.747055  | 0.54109  |
| 0.180572246  | 1         | 0        |
| -2.932376924 | 0.697594  | -0.75751 |
| #DIV/0!      | ?         | #DIV/0!  |
| #DIV/0!      | ?         | #DIV/0!  |
| -0.449903745 | 0.960466  | -0.06338 |
| -0.292781749 | 0.918942  | -0.18845 |
| -0.364702982 | 0.993312  | -0.01349 |
| 0.519374159  | 0.854188  | 0.3599   |
| -0.167426843 | 0.960131  | 0.04878  |
| -0.172836597 | 0.940473  | -0.12131 |
| -0.4061505   | 0.890611  | 0.14982  |
| -32.43274378 | 0.308068  | 43.3179  |
| -0.275353763 | 0.969175  | -0.06826 |

|              |          |          |
|--------------|----------|----------|
| -0.178500896 | 0.940052 | -0.13688 |
| -0.142957954 | 0.885901 | 0.27208  |
| -0.706122619 | 0.90437  | -0.18194 |
| 0            | 0.651448 | 1        |
| -0.161881663 | 0.899051 | -0.20897 |
| 0.216968949  | 0.894694 | -0.27335 |
| -0.523537544 | 0.728563 | -0.69389 |
| 0.349942471  | 0.850538 | 0.37197  |
| -1.126491873 | 0.816079 | -0.42334 |
| #NUM!        | 1        | 0        |
| 0.9510904    | 0.231264 | 1.34104  |
| -0.499210481 | 0.915266 | -0.13886 |
| #DIV/0!      | ?        | #DIV/0!  |
| -1.328151097 | 0.764724 | -0.56299 |
| -0.912938983 | 0.678405 | -0.33754 |
| -1.007593149 | 0.914666 | -0.16002 |
| -0.332045441 | 0.909685 | 0.1876   |
| -0.373767026 | 0.86487  | -0.32618 |
| -0.882804099 | 0.938256 | -0.13612 |
| -0.416374777 | 0.90066  | -0.22721 |
| -1.284397343 | 0.488104 | 0.68176  |
| -0.820590749 | 0.862772 | -0.31536 |
| 0.523981851  | 0.699265 | -1.15554 |
| -0.125055526 | 0.994147 | -0.01167 |
| -0.054908341 | 0.820121 | 0.30143  |
| -0.254194739 | 0.670887 | 0.58496  |
| -0.367488706 | 0.919575 | 0.10388  |
| -1.350373797 | 0.461922 | -1.69091 |
| -0.530836547 | 0.313452 | 0.74162  |
| -1           | 0.039481 | 2.16993  |
| -0.350364925 | 0.926614 | -0.16089 |
| 0.361804114  | 0.865038 | 0.32009  |
| 0.466670268  | 0.760475 | 0.51788  |
| #DIV/0!      | ?        | #DIV/0!  |
| -0.071592617 | 0.903023 | -0.25098 |
| -1.033947332 | 0.799773 | -0.38187 |
| -0.359460151 | 0.921373 | 0.15679  |
| -0.507994109 | 0.996201 | -0.00768 |
| 9.472685798  | ?        | -41.0249 |
| #NUM!        | 1        | 0        |
| -1.897122021 | 0.424015 | -0.44146 |
| -0.565597176 | 0.841191 | -0.38018 |
| #NUM!        | 0.308068 | -30.1165 |
| -1.031782393 | 0.924809 | 0.16477  |
| -0.255263967 | 0.898284 | 0.12437  |
| 0.022115718  | 0.969216 | -0.06648 |
| -0.678071905 | 0.849717 | -0.29956 |
| #NUM!        | 0.308068 | #NUM!    |
| 1            | 0.622002 | #NUM!    |
| -0.334380874 | 0.962555 | -0.07523 |
| -1.313393708 | 0.870794 | -0.23621 |
| 1.321928095  | 0.837425 | -1       |
| -0.303780748 | 0.835927 | -0.42114 |
| -0.716207034 | 0.968022 | -0.06413 |
| -1.107171524 | 0.951718 | -0.06706 |
| -1.415037499 | 0.71213  | -0.67807 |

|              |          |          |
|--------------|----------|----------|
| 0.052827688  | 0.96428  | -0.08841 |
| -0.100334729 | 0.984228 | 0.03134  |
| #DIV/0!      | 0.308068 | #DIV/0!  |
| 0            | 0.252216 | 2.80735  |
| -0.277609745 | 0.991318 | -0.0193  |
| -0.486917622 | 0.986999 | -0.02788 |
| #DIV/0!      | ?        | #DIV/0!  |
| #NUM!        | 0.785812 | 0.41504  |
| -0.669851398 | 0.883406 | 0.26303  |
| -0.169925001 | 0.802495 | -0.58496 |
| #DIV/0!      | 0.308068 | #DIV/0!  |
| -0.305936062 | 0.995544 | 0.00916  |
| #DIV/0!      | ?        | #DIV/0!  |
| #DIV/0!      | 0.308068 | #DIV/0!  |
| 0            | 1        | 0        |
| -0.415037499 | 0.698091 | 0.80735  |
| -0.673690579 | 0.975108 | -0.04139 |
| -0.535231506 | 0.856243 | -0.358   |
| #DIV/0!      | ?        | #DIV/0!  |
| #DIV/0!      | ?        | #DIV/0!  |
| -0.903587779 | 0.888359 | -0.21461 |
| -0.415037499 | 0.847091 | -0.41504 |
| #DIV/0!      | ?        | #DIV/0!  |
| 0.15497466   | 0.819261 | 0.36587  |
| -1.584962501 | 0.764931 | -0.58496 |
| -0.217466301 | 0.865969 | -0.32845 |
| -0.250650681 | 0.776    | -0.61958 |
| -0.648888997 | 0.958992 | 0.05582  |
| #DIV/0!      | 0.116158 | #DIV/0!  |
| -0.011404763 | 0.84845  | 0.30594  |
| -1.672425342 | 0.78451  | -0.4245  |
| -0.633217669 | 0.978988 | -0.03847 |
| -0.241783638 | 0.938295 | -0.13987 |
| -0.657112286 | 0.619973 | -1.18763 |
| -0.285744065 | 0.968249 | -0.06831 |
| -0.362194386 | 0.94868  | -0.0983  |
| -0.686305917 | 0.652558 | -0.75058 |
| #NUM!        | 0.622002 | -1       |
| -0.641546029 | 0.837079 | -0.42742 |
| -0.15173491  | 0.988531 | -0.02271 |
| -0.321928095 | 1        | 0        |
| -0.885195525 | 0.768878 | -0.55682 |
| -0.488675809 | 0.931568 | 0.08172  |
| 0.202816883  | 1        | 0        |
| -0.469485283 | 0.944058 | -0.10692 |
| -0.305900798 | 0.921447 | 0.14159  |
| 0            | 0.806588 | -0.152   |
| -4.247927513 | 0.466292 | -1.24793 |
| #DIV/0!      | ?        | #DIV/0!  |
| -0.914865447 | 0.774021 | 0.49498  |
| #NUM!        | 0.18169  | -1.58496 |
| -0.327649769 | 0.91425  | 0.13446  |
| 0.397759508  | 0.953326 | 0.13124  |
| #DIV/0!      | ?        | #DIV/0!  |
| #DIV/0!      | ?        | #DIV/0!  |
| #DIV/0!      | ?        | #DIV/0!  |

|              |          |          |
|--------------|----------|----------|
| #DIV/0!      | ?        | #DIV/0!  |
| -0.004570912 | 0.89301  | 0.20332  |
| -0.380031049 | 0.957434 | -0.09008 |
| -0.074767768 | 0.952101 | -0.08632 |
| #NUM!        | 1        | 0        |
| #DIV/0!      | ?        | #DIV/0!  |
| -1.204013892 | 0.604304 | 0.90583  |
| -0.583314883 | 0.944288 | -0.10409 |
| -0.359627542 | 0.94183  | -0.12937 |
| #DIV/0!      | 0.622002 | #DIV/0!  |
| -0.477321778 | 0.944309 | -0.12985 |
| #DIV/0!      | ?        | #DIV/0!  |
| -0.23544385  | 0.949878 | 0.09259  |
| -0.474806754 | 0.969804 | -0.0571  |
| #DIV/0!      | 0.353387 | #DIV/0!  |
| -4.169925001 | 0.597162 | -1       |
| #NUM!        | 0.308068 | #NUM!    |
| #DIV/0!      | 1        | #DIV/0!  |
| -1.404390255 | 0.856685 | -0.2824  |
| #NUM!        | 0.450185 | -1       |
| -0.584962501 | 0.3832   | #NUM!    |
| -0.688055994 | 0.494042 | 0.46395  |
| -3.321928095 | 0.809615 | -0.32193 |
| -1.157541277 | 0.942992 | -0.10309 |
| 0.637429921  | 0.983027 | -0.05445 |
| -0.314479333 | 0.528043 | 0.77182  |
| -0.415037499 | 0.791627 | -0.41504 |
| 0.158409097  | 0.989821 | -0.02514 |
| -1.328665129 | 0.821129 | -0.35138 |
| -0.16549003  | 0.364244 | 0.63844  |
| #NUM!        | 0.308068 | #NUM!    |
| -0.067114196 | 0.935124 | -0.1375  |
| #NUM!        | 1        | 0        |
| #DIV/0!      | ?        | #DIV/0!  |
| -0.370604312 | 0.964625 | -0.07747 |
| -0.412260415 | 0.861994 | 0.21403  |
| -0.449054438 | 0.8947   | 0.15966  |
| -0.632572357 | 0.91908  | 0.11791  |
| 1.052460304  | 0.697576 | 0.87136  |
| 0.754887502  | 0.66036  | 0.85798  |
| -1.378511623 | 1        | 0        |
| #DIV/0!      | 0.308068 | #DIV/0!  |
| 0.910950146  | 0.587582 | 1.15103  |
| -0.095157233 | 0.865852 | 0.22677  |
| -0.415037499 | 0.847091 | -0.41504 |
| -0.60668147  | 0.767366 | -0.3997  |
| -0.506959989 | 0.347945 | 0.66577  |
| #DIV/0!      | ?        | #DIV/0!  |
| -0.48144162  | 0.866163 | -0.17688 |
| -0.138291021 | 0.988811 | -0.02381 |
| -0.106915204 | 0.959844 | 0.09954  |
| -0.697502523 | 0.936695 | -0.09168 |
| -0.038474148 | 0.991845 | 0.01961  |
| -0.326661314 | 0.971122 | -0.05922 |
| -2.938599455 | 0.964375 | 0.0614   |
| #DIV/0!      | ?        | #DIV/0!  |

|              |           |          |
|--------------|-----------|----------|
| 0            | 1         | 0        |
| #DIV/0!      | ?         | #DIV/0!  |
| -0.583706345 | 0.81575   | -0.46447 |
| #DIV/0!      | ?         | #DIV/0!  |
| 0.148098639  | 0.805434  | -0.50901 |
| -0.277533976 | 0.664648  | 0.39232  |
| 1.041138695  | 0.849123  | 0.42099  |
| 2.5360529    | 0.773953  | 1.1375   |
| #DIV/0!      | ?         | #DIV/0!  |
| #DIV/0!      | ?         | #DIV/0!  |
| -0.124208058 | 0.982159  | -0.03787 |
| -0.256692879 | 0.986305  | -0.02889 |
| 1.658025963  | 0.950174  | 0.22507  |
| -0.505914879 | 0.964942  | 0.05944  |
| -1           | 0         | -2       |
| -0.265313288 | 0.962287  | -0.08716 |
| -1.807354922 | 0.355889  | -1       |
| 1            | 0.806588  | -1       |
| #DIV/0!      | ?         | #DIV/0!  |
| -2.321928095 | 0.415333  | -2.32193 |
| 0.021294778  | 0.925593  | -0.17664 |
| -1.652076697 | 0.803152  | -0.45943 |
| 0            | 0.798692  | 0.51457  |
| -0.35330851  | 0.970285  | 0.0551   |
| -1.087462841 | 0.693164  | -0.76553 |
| #NUM!        | 0.308068  | #NUM!    |
| -0.466737406 | 0.978775  | 0.03444  |
| -0.194308127 | 0.798971  | 0.36773  |
| 0            | 0.710482  | -1       |
| -0.734642457 | 0.998585  | -0.0013  |
| 3.916274887  | 0.319607  | 5.18185  |
| -4.110461822 | 0.136882  | 71.3168  |
| -0.415037499 | 0.837835  | 0.24511  |
| -0.089282424 | 0.853127  | 0.25663  |
| -0.306661338 | 0.937767  | -0.12832 |
| -1.108581302 | 0.941972  | 0.11643  |
| #DIV/0!      | 1         | #DIV/0!  |
| -1.991663591 | 0.470772  | -1.65111 |
| -0.972289798 | 0.308068  | 56.3872  |
| 0.115477217  | 0.768685  | -0.77761 |
| #NUM!        | 0.308068  | 81.9042  |
| -2.066417375 | 0.49047   | -0.58792 |
| #DIV/0!      | ?         | #DIV/0!  |
| -0.317029295 | 0.824653  | 0.24382  |
| -87.34223603 | 0.0742745 | -102.274 |
| 83.12107202  | 0.39925   | 83.538   |
| 0.214162619  | 0.454231  | 0.86316  |
| 0.485426827  | 0.306059  | 1.58496  |
| -0.894375497 | 0.638689  | -0.6108  |
| -0.876831172 | 0.984778  | -0.02485 |
| 0.047665838  | 0.976855  | 0.04692  |
| -0.084600562 | 0.832305  | 0.34105  |
| #NUM!        | 0.423779  | -2.14124 |
| 0.271031427  | 0.154211  | 0.67718  |
| 0.777963995  | 0.91583   | -0.22799 |
| -0.405977102 | 0.997629  | -0.0043  |

|              |           |          |
|--------------|-----------|----------|
| #NUM!        | 0.639338  | -0.86008 |
| -2.750736359 | 0.11581   | -1.00586 |
| 0.321928095  | 0.360002  | 2.52356  |
| #NUM!        | 0.586878  | 0.688    |
| -18.54687673 | 0.946102  | 0.10713  |
| 0.123827265  | 0.379083  | 1.78517  |
| 0.123827265  | 0.379083  | 1.78517  |
| #DIV/0!      | 0.308068  | #DIV/0!  |
| #DIV/0!      | ?         | #DIV/0!  |
| 0.491853096  | 0.605047  | -1.67807 |
| 13.18951672  | 0.999904  | -63.8887 |
| #DIV/0!      | 0.724377  | #DIV/0!  |
| -3.169925579 | 0.513713  | -0.36257 |
| -2.700439718 | 0.422962  | -2.08755 |
| 0.123827265  | 0.379083  | 1.78517  |
| 0.123827265  | 0.379083  | 1.78517  |
| -3.169925579 | 0.513713  | -0.36257 |
| -3.169925579 | 0.513713  | -0.36257 |
| -3.169925579 | 0.513713  | -0.36257 |
| #NUM!        | 0.308068  | #NUM!    |
| 1            | 0.133887  | 2.58496  |
| 1.999999134  | 0.622002  | 1        |
| #DIV/0!      | 0.308068  | #DIV/0!  |
| #DIV/0!      | ?         | #DIV/0!  |
| #NUM!        | 0.308068  | #NUM!    |
| #DIV/0!      | ?         | #DIV/0!  |
| #DIV/0!      | ?         | #DIV/0!  |
| #DIV/0!      | ?         | #DIV/0!  |
| 1.925999419  | 0.371098  | 1.926    |
| #DIV/0!      | 0.0917211 | #DIV/0!  |
| 1.999999134  | 0.622002  | 1        |
| -53.58496481 | 0.28732   | 1.53466  |
| #NUM!        | 0.308068  | 39.0983  |
| -2.807354922 | 0.568955  | -1.22239 |
| #NUM!        | 0.307978  | 33.2769  |
| 1.938598201  | 0.301163  | 2.41504  |
| #NUM!        | ?         | -36.1113 |
| -3.906876169 | 0.835021  | -0.32192 |
| #DIV/0!      | 1         | #DIV/0!  |
| #DIV/0!      | ?         | #DIV/0!  |
| 0.123827265  | 0.379083  | 1.78517  |
| #DIV/0!      | 0.308068  | #DIV/0!  |
| #NUM!        | 0.756486  | 0.58496  |
| 0            | 0.651448  | 1        |
| 0.123827265  | 0.379083  | 1.78517  |
| #NUM!        | 0.102728  | 2.80735  |
| 1.925999419  | 0.371098  | 1.926    |
| #DIV/0!      | ?         | #DIV/0!  |
| #NUM!        | 0.756486  | 0.58496  |
| #DIV/0!      | 0.450185  | #DIV/0!  |
| #DIV/0!      | ?         | #DIV/0!  |
| #DIV/0!      | ?         | #DIV/0!  |
| 1.584962501  | 0.468351  | 2.32193  |
| 1.584962501  | 0.468351  | 2.32193  |
| 1            | 0.433552  | 1.37851  |
| #DIV/0!      | ?         | #DIV/0!  |

|              |          |          |
|--------------|----------|----------|
| 1.584962501  | 0.468351 | 2.32193  |
| #DIV/0!      | ?        | #DIV/0!  |
| 1            | 0.433552 | 1.37851  |
| 1.584962501  | 0.468351 | 2.32193  |
| #DIV/0!      | ?        | #DIV/0!  |
| #DIV/0!      | 1        | #DIV/0!  |
| #DIV/0!      | ?        | #DIV/0!  |
| #NUM!        | 0.586878 | 0.688    |
| 36.82669902  | 0.310595 | 39.9088  |
| #NUM!        | 0.586878 | 0.688    |
| -1.321928095 | 0.331841 | -2.32193 |
| #DIV/0!      | 0.308068 | #DIV/0!  |
| 1.925999419  | 0.371098 | 1.926    |
| #NUM!        | 0.586878 | 0.688    |
| #DIV/0!      | ?        | #DIV/0!  |
| #NUM!        | 0.586878 | 0.688    |
| #DIV/0!      | 1        | #DIV/0!  |
| #DIV/0!      | ?        | #DIV/0!  |
| #DIV/0!      | ?        | #DIV/0!  |
| #DIV/0!      | ?        | #DIV/0!  |
| 0.10393427   | 0.682555 | 0.36031  |
| #DIV/0!      | 0.308068 | #DIV/0!  |
| 1            | 0.730615 | 0.73697  |
| 1            | 0.730615 | 0.73697  |
| #DIV/0!      | 0.308068 | #DIV/0!  |
| #DIV/0!      | ?        | #DIV/0!  |
| 1            | 0.433552 | 1.37851  |
| #DIV/0!      | 0.241875 | #DIV/0!  |
| #DIV/0!      | ?        | #DIV/0!  |
| #DIV/0!      | ?        | #DIV/0!  |
| #DIV/0!      | ?        | #DIV/0!  |
| #DIV/0!      | ?        | #DIV/0!  |
| #DIV/0!      | ?        | #DIV/0!  |
| -2.321928095 | 0.31594  | -29.8269 |
| #NUM!        | 0.308068 | #NUM!    |
| #DIV/0!      | ?        | #DIV/0!  |
| -1.765534746 | 0.87906  | -0.18057 |
| -1.765534746 | 0.87906  | -0.18057 |
| #DIV/0!      | 1        | #DIV/0!  |
| -1.584962501 | 0.408983 | 2.22239  |
| #DIV/0!      | ?        | #DIV/0!  |
| #DIV/0!      | 0.308068 | #DIV/0!  |
| -1.765534746 | 0.87906  | -0.18057 |
| 1.925999419  | 0.371098 | 1.926    |
| #DIV/0!      | ?        | #DIV/0!  |
| #DIV/0!      | ?        | #DIV/0!  |
| -0.870883882 | 0.497096 | 1.60709  |
| #DIV/0!      | ?        | #DIV/0!  |
| 0.652076697  | 0.106853 | 2.51457  |
| 2.415037499  | 0.345683 | 2.28293  |
| 0.115477217  | 0.265726 | -1       |
| 1.938598201  | 0.301163 | 2.41504  |
| 1            | 0.433552 | 1.37851  |
| #DIV/0!      | 0.308068 | #DIV/0!  |
| #DIV/0!      | ?        | #DIV/0!  |
| 1            | 0.433552 | 1.37851  |

|              |          |          |
|--------------|----------|----------|
| 0.94641974   | 0.36589  | 2.07682  |
| 0.483789292  | 0.415702 | 2.35757  |
| #DIV/0!      | ?        | #DIV/0!  |
| #NUM!        | 0.586878 | 0.688    |
| #NUM!        | 0.586878 | 0.688    |
| #DIV/0!      | 0.241875 | #DIV/0!  |
| #DIV/0!      | ?        | #DIV/0!  |
| #DIV/0!      | ?        | #DIV/0!  |
| #DIV/0!      | ?        | #DIV/0!  |
| #DIV/0!      | ?        | #DIV/0!  |
| -0.874469118 | 0.717686 | -0.28951 |
| #DIV/0!      | 0.308068 | #DIV/0!  |
| 0.10393427   | 0.682555 | 0.36031  |
| 0.10393427   | 0.682555 | 0.36031  |
| #DIV/0!      | ?        | #DIV/0!  |
| -3.169925579 | 0.513713 | -0.36257 |
| 0.736965594  | 0.398521 | 2.58496  |
| 0.483789292  | 0.415702 | 2.35757  |
| 0.483789292  | 0.415702 | 2.35757  |
| -2.700439718 | 0.422962 | -2.08755 |
| -2           | 0.122073 | 1.58496  |
| 1            | 0.450185 | 2        |
| #NUM!        | 0.308068 | 28.076   |
| #NUM!        | 0.308068 | 28.076   |
| -1           | 0.793677 | -0.45568 |
| 1.999999134  | 0.622002 | 1        |
| #DIV/0!      | ?        | #DIV/0!  |
| #DIV/0!      | ?        | #DIV/0!  |
| #DIV/0!      | ?        | #DIV/0!  |
| #DIV/0!      | ?        | #DIV/0!  |
| #DIV/0!      | ?        | #DIV/0!  |
| #DIV/0!      | ?        | #DIV/0!  |
| #DIV/0!      | ?        | #DIV/0!  |
| #DIV/0!      | 1        | #DIV/0!  |
| 1.323344126  | 0.651305 | 1.32193  |
| #DIV/0!      | ?        | #DIV/0!  |
| #DIV/0!      | ?        | #DIV/0!  |
| 4.3217225    | 0.911657 | 1.3219   |
| 1.938598201  | 0.301163 | 2.41504  |
| #NUM!        | 0.622002 | -1       |
| 49.00000068  | 0.450185 | 49       |
| #DIV/0!      | ?        | #DIV/0!  |
| #DIV/0!      | ?        | #DIV/0!  |
| #DIV/0!      | ?        | #DIV/0!  |
| -0.704544116 | 0.92768  | 0.12553  |
| 0.284059909  | 0.996232 | 0.00746  |
| -0.494764692 | 0.961405 | -0.09622 |
| -0.592575685 | 0.961622 | -0.078   |
| 0.1740294    | 0.414584 | 0.50467  |
| -1.037474705 | 0.793985 | -0.47805 |
| -0.037232906 | 0.803618 | 0.42648  |
| 0.625875694  | 0.953393 | -0.12221 |
| -0.059316684 | 0.696091 | 0.45679  |
| 0.169925001  | 0.965406 | 0.05016  |
| 0.269648148  | 0.884405 | 0.15742  |
| 0.366896005  | 0.963878 | 0.07595  |



|              |           |          |
|--------------|-----------|----------|
| 0.677023054  | 0.880922  | 0.18107  |
| 0.046542586  | 0.500122  | 0.60842  |
| 0.489331282  | 0.355946  | 1.22574  |
| -0.926290314 | 0.849549  | -0.31757 |
| 0.111283334  | 0.721926  | 0.40651  |
| -0.39193847  | 0.936524  | -0.14277 |
| -0.103093493 | 0.898733  | 0.18641  |
| -0.162249833 | 0.820782  | 0.24684  |
| 0.118644496  | 0.223328  | 0.57116  |
| -0.583368332 | 0.71237   | 0.57338  |
| -0.778169838 | 0.923097  | 0.13054  |
| -0.052851316 | 0.801709  | 0.36233  |
| #NUM!        | 0.622002  | 0.41504  |
| #DIV/0!      | ?         | #DIV/0!  |
| #DIV/0!      | ?         | #DIV/0!  |
| #DIV/0!      | ?         | #DIV/0!  |
| #DIV/0!      | ?         | #DIV/0!  |
| 0.109688478  | 0.940036  | 0.12978  |
| -2.015596855 | 0.946465  | 0.07555  |
| -0.209528228 | 0.654544  | -0.8876  |
| -0.156787117 | 0.969782  | -0.06497 |
| -0.272609752 | 0.876697  | 0.18868  |
| -0.584962501 | 0.785812  | -0.58496 |
| 2.383308007  | 0.977718  | -0.11611 |
| 0.033501033  | 0.479322  | -1.74783 |
| #DIV/0!      | ?         | #DIV/0!  |
| -2.880387273 | 0.763317  | -0.57043 |
| 1.987676796  | 0.663916  | 1.57796  |
| -23.71651836 | 0.509211  | -1.502   |
| -0.281875791 | 0.981456  | 0.0406   |
| -2.064016493 | 0.934805  | 0.11027  |
| -0.746643508 | 0.981576  | -0.02642 |
| -2.115010854 | 0.913289  | 0.1626   |
| -0.084888898 | 0.902396  | 0.20462  |
| -33.43925521 | 0.835044  | -0.36916 |
| -0.166471954 | 0.594227  | 0.80568  |
| #NUM!        | ?         | #NUM!    |
| 0.039402142  | 0.311484  | 1.33279  |
| #DIV/0!      | ?         | #DIV/0!  |
| #DIV/0!      | 1         | #DIV/0!  |
| -0.765713755 | 0.0814525 | 0.56709  |
| 0.127660123  | 0.857173  | -0.28174 |
| -0.477572497 | 0.912341  | -0.1402  |
| 9.37239332   | ?         | -3.45058 |
| -0.510194732 | 0.975235  | 0.04532  |
| 0.087925286  | 0.680323  | 0.45153  |
| 1.321928095  | 0.837425  | -1       |
| -0.880852735 | 0.794012  | 0.34656  |
| 98.05664791  | 0.515664  | 97.6416  |
| 0.924272674  | 0.835664  | 0.45943  |
| -3.736268061 | ?         | 3.69885  |
| -1.412125904 | 0.913308  | -0.06711 |
| -0.072928112 | 0.913116  | -0.18334 |
| -0.483595649 | 0.949211  | -0.10734 |
| #DIV/0!      | ?         | #DIV/0!  |
| -10.36641929 | 0.30819   | -11.6791 |

|              |            |          |
|--------------|------------|----------|
| -0.296905828 | 0.947432   | 0.05857  |
| -28.26436091 | 0.00104305 | -1.33314 |
| -0.521952703 | 0.951804   | 0.07936  |
| 1.039356686  | 0.88507    | 0.32108  |
| -0.493630279 | 0.699957   | -0.80066 |
| 0.078736671  | 0.933241   | 0.11268  |
| -0.180572246 | 0.870186   | 0.23447  |
| #DIV/0!      | ?          | #DIV/0!  |
| -0.222782042 | 0.89819    | 0.16496  |
| 0.440760588  | 0.927709   | -0.21482 |
| -0.003501457 | 0.89579    | 0.18921  |
| #DIV/0!      | ?          | #DIV/0!  |
| -52.72443599 | 0.308068   | -43.8895 |
| #DIV/0!      | ?          | #DIV/0!  |
| 0.403064858  | 0.890975   | 0.28737  |
| -1.969626351 | 0.837403   | 0.30339  |
| 0.377609102  | 0.993682   | 0.01371  |
| -0.303138269 | 0.864402   | 0.14838  |
| -29.34405046 | 0.308068   | -88.1187 |
| -1.607694804 | 0.971034   | -0.04771 |
| -0.720938103 | 0.822113   | 0.06261  |
| -0.065723949 | 0.691568   | -1.06572 |
| -0.235390788 | 0.940603   | 0.08524  |
| 0.288510165  | 0.724856   | 0.57827  |
| 0.044755912  | 0.640895   | 0.7439   |
| -0.528419299 | 0.933748   | 0.07458  |
| #DIV/0!      | 0.999991   | #DIV/0!  |
| 0.261055901  | 0.894467   | 0.24914  |
| #DIV/0!      | 1          | #DIV/0!  |
| #DIV/0!      | ?          | #DIV/0!  |
| #NUM!        | 0.622002   | 1        |
| -0.030691043 | 0.90887    | -0.21803 |
| -0.171047214 | 0.813075   | 0.33832  |
| 1            | 0.622002   | #NUM!    |
| #DIV/0!      | ?          | #DIV/0!  |
| -0.36252171  | 0.964464   | -0.0628  |
| -13.14196703 | 0.308077   | -15.4687 |
| -0.78124301  | 0.622335   | -1.12242 |
| -0.625643163 | 0.963025   | -0.03403 |
| -0.527931556 | 0.912552   | 0.17509  |
| #NUM!        | 0.438509   | -2       |
| #DIV/0!      | 0.308068   | #DIV/0!  |
| #DIV/0!      | ?          | #DIV/0!  |
| -0.898835083 | 0.804114   | -0.26164 |
| 0            | 0.710482   | -1       |
| -1.874469118 | 0.738539   | -0.65208 |
| #DIV/0!      | ?          | #DIV/0!  |
| #NUM!        | 0.622002   | 1        |
| #DIV/0!      | ?          | #DIV/0!  |
| #NUM!        | 1          | 0        |
| -0.212030857 | 0.883796   | -0.28044 |
| #DIV/0!      | ?          | #DIV/0!  |
| -1.049776235 | 0.934992   | 0.10946  |
| #DIV/0!      | ?          | #DIV/0!  |
| -0.571906348 | 1          | 0        |
| -0.459431619 | 0.816359   | 0.27753  |

|              |           |          |
|--------------|-----------|----------|
| #DIV/0!      | 0.308068  | #DIV/0!  |
| -3           | 0.393741  | -1.41504 |
| #DIV/0!      | ?         | #DIV/0!  |
| #DIV/0!      | ?         | #DIV/0!  |
| #NUM!        | 0.0227138 | -2.58496 |
| #NUM!        | 0.308068  | #NUM!    |
| -0.330768446 | 0.883373  | -0.22239 |
| #NUM!        | 0.756486  | 0.58496  |
| 0.514573173  | 0.767557  | 0.51457  |
| -0.309840545 | 0.99786   | 0.00369  |
| #DIV/0!      | ?         | #DIV/0!  |
| 0            | 0.651448  | 1        |
| 0.3016557    | 0.929514  | 0.1587   |
| 1.215591629  | 0.327997  | #NUM!    |
| #DIV/0!      | ?         | #DIV/0!  |
| 0.819427754  | 0.844094  | 0.37197  |
| -1.788804526 | 0.700891  | -0.68692 |
| -15.27099039 | 0.308068  | -47.9877 |
| -2           | 0.630057  | -1       |
| 0            | 0.513713  | -1.58496 |
| -1.115477217 | 0.686187  | -0.70044 |
| #DIV/0!      | ?         | #DIV/0!  |
| 0.922958964  | 0.962371  | -0.12029 |
| #DIV/0!      | ?         | #DIV/0!  |
| -0.137503524 | 0.850928  | 0.25235  |
| -0.282186856 | 0.87849   | -0.28883 |
| -0.336182079 | 0.950026  | 0.09412  |
| #DIV/0!      | ?         | #DIV/0!  |
| -0.989028882 | 0.794775  | 0.40952  |
| #NUM!        | 0.18169   | 1.58496  |
| -0.881355504 | 0.648723  | -0.85626 |
| -0.956278623 | 0.979637  | -0.04509 |
| 1.584962501  | 1         | 0        |
| -0.847996907 | 0.948504  | -0.08246 |
| #DIV/0!      | ?         | #DIV/0!  |
| 0.783012962  | 0.852776  | 0.37551  |
| -1           | 1         | 0        |
| 1            | 0.885352  | 0.41504  |
| #DIV/0!      | ?         | #DIV/0!  |
| 0.192645078  | 0.904922  | 0.19265  |
| #DIV/0!      | ?         | #DIV/0!  |
| 1            | 0.481309  | 2        |
| #DIV/0!      | 1         | #DIV/0!  |
| #DIV/0!      | ?         | #DIV/0!  |
| #DIV/0!      | ?         | #DIV/0!  |
| 0.378511623  | 0.978039  | 0.06274  |
| #DIV/0!      | ?         | #DIV/0!  |
| #DIV/0!      | ?         | #DIV/0!  |
| #DIV/0!      | 0.308068  | #DIV/0!  |
| #DIV/0!      | ?         | #DIV/0!  |
| #DIV/0!      | ?         | #DIV/0!  |
| #DIV/0!      | ?         | #DIV/0!  |
| #DIV/0!      | ?         | #DIV/0!  |
| -0.080374919 | 0.948807  | -0.11075 |
| 4.511237024  | 0.962863  | -4.09525 |
| #DIV/0!      | 1         | #DIV/0!  |

|              |          |          |
|--------------|----------|----------|
| -0.584962501 | 0.730222 | -0.64636 |
| #NUM!        | 1        | 0        |
| -0.415037499 | 1        | 0        |
| 1.22373709   | 0.765747 | 0.77745  |
| -0.945552216 | 0.852145 | -0.3254  |
| -1.422267605 | 0.959178 | -0.05641 |
| #DIV/0!      | ?        | #DIV/0!  |
| #NUM!        | 0.756486 | 0.58496  |
| -0.390269594 | 0.997827 | 0.00468  |
| -1.174784514 | 0.881857 | 0.23325  |
| -0.584962501 | 0.785812 | -0.58496 |
| -1.037989586 | 0.997704 | -0.00326 |
| #DIV/0!      | 1        | #DIV/0!  |
| #DIV/0!      | ?        | #DIV/0!  |
| #NUM!        | 0.622002 | -1       |
| #DIV/0!      | ?        | #DIV/0!  |
| -1           | 0.353387 | #NUM!    |
| -0.321928095 | 0.18169  | 1.58496  |
| -0.830074999 | 0.738378 | -0.47644 |
| -1.61667136  | 0.395796 | -2.27563 |
| -1.29310526  | 0.913666 | -0.08665 |
| 0            | 1        | 0        |
| #DIV/0!      | ?        | #DIV/0!  |
| -2.459431619 | 0.662394 | -0.87447 |
| 0.584962501  | 1        | 0        |
| #DIV/0!      | ?        | #DIV/0!  |
| #DIV/0!      | ?        | #DIV/0!  |
| #NUM!        | 0.308068 | #NUM!    |
| -0.790546634 | 0.987955 | 0.02237  |
| 1.94753258   | 0.124949 | 2.23704  |
| #DIV/0!      | ?        | #DIV/0!  |
| -2.5360529   | 0.568955 | -0.77052 |
| #DIV/0!      | ?        | #DIV/0!  |
| -0.005782353 | 0.902218 | -0.25843 |
| -0.184424571 | 0.864102 | 0.1635   |
| -0.520832163 | 0.79863  | -0.45943 |
| -0.072658609 | 0.771604 | 0.31454  |
| -0.360735173 | 0.850947 | 0.24381  |
| -0.223662511 | 0.964433 | 0.07568  |
| -1.848472899 | 0.483606 | -1.74687 |
| -0.056583528 | 0.996335 | 0.00647  |
| #DIV/0!      | ?        | #DIV/0!  |
| -0.144582153 | 0.996137 | -0.00855 |
| #DIV/0!      | ?        | #DIV/0!  |
| -0.841302254 | 0.77368  | -0.29698 |
| 0.679684756  | 0.727333 | 0.48358  |
| -0.193586478 | 0.998367 | 0.00329  |
| -0.255895766 | 0.975883 | -0.04516 |
| -0.219146762 | 0.932772 | 0.11247  |
| 2.127755547  | 0.352063 | 1.78427  |
| -0.91753784  | 0.591782 | -1.28011 |
| -0.387023123 | 0.709561 | -0.76553 |
| -0.921796093 | 0.492199 | -0.51403 |
| #DIV/0!      | ?        | #DIV/0!  |
| #DIV/0!      | ?        | #DIV/0!  |
| -1.203852509 | 0.943492 | 0.07817  |

|              |          |          |
|--------------|----------|----------|
| #NUM!        | 0.622002 | -0.58496 |
| 0.195374871  | 0.804135 | 0.43596  |
| -1           | 1        | 0        |
| #DIV/0!      | ?        | #DIV/0!  |
| #DIV/0!      | ?        | #DIV/0!  |
| -1           | 0.433134 | -2.58496 |
| #NUM!        | 0.308068 | #NUM!    |
| -0.275142093 | 0.959024 | -0.08421 |
| -0.2410081   | 0.763639 | 0.46949  |
| #DIV/0!      | ?        | #DIV/0!  |
| -0.584962501 | 0.3832   | 1        |
| #DIV/0!      | 0.308068 | #DIV/0!  |
| -0.514573173 | 0.811936 | -0.32193 |
| #NUM!        | 0.18169  | -1.58496 |
| #NUM!        | 1        | 0        |
| 0.485426827  | 0.749249 | 0.67807  |
| #NUM!        | 0.198892 | 2        |
| #DIV/0!      | ?        | #DIV/0!  |
| #DIV/0!      | 1        | #DIV/0!  |
| -0.738856414 | 0.972983 | 0.05014  |
| #NUM!        | 0.308068 | #NUM!    |
| -0.202816883 | 0.915397 | 0.17779  |
| -0.607215308 | 0.990132 | 0.0195   |
| 0.169925001  | 0.65555  | -1.41504 |
| #DIV/0!      | ?        | #DIV/0!  |
| #DIV/0!      | ?        | #DIV/0!  |
| #DIV/0!      | ?        | #DIV/0!  |
| 0.210306098  | 0.959107 | 0.07327  |
| -0.590295945 | 0.792826 | -0.46744 |
| -0.396758766 | 0.841062 | -0.37956 |
| #DIV/0!      | 0.353387 | #DIV/0!  |
| -1.807354922 | 0.541977 | -1.22239 |
| -1           | 0.651448 | -1       |
| -0.125530882 | 0.909854 | 0.18763  |
| 0.03170886   | 0.949074 | 0.12286  |
| 0.091759619  | 0.920038 | 0.15775  |
| #DIV/0!      | 0.308068 | #DIV/0!  |
| #NUM!        | 0.756486 | 0.58496  |
| -1.584962501 | 0.700402 | -0.77761 |
| 0            | 0.785812 | 0.58496  |
| #NUM!        | 1        | 0        |
| -14.94677465 | 0.308084 | -14.5984 |
| #DIV/0!      | 0.353387 | #DIV/0!  |
| #DIV/0!      | ?        | #DIV/0!  |
| 2            | 1        | 0        |
| 0.736965594  | 0.881184 | -0.36257 |
| -0.648834684 | 0.856107 | -0.26076 |
| 0            | 1        | 0        |
| #NUM!        | 0.621865 | -1.00021 |
| #DIV/0!      | ?        | #DIV/0!  |
| -0.289506617 | 0.73069  | 0.5787   |
| -0.491214312 | 0.653667 | -0.79742 |
| -0.263034406 | 1        | 0        |
| -0.18679882  | 0.904284 | 0.15535  |
| -0.263034406 | 0.84263  | -0.36257 |
| -2           | 0.353387 | -1       |

|              |          |          |
|--------------|----------|----------|
| #DIV/0!      | 0.308068 | #DIV/0!  |
| 0.137503524  | 0.919113 | -0.23447 |
| #NUM!        | 1        | 0        |
| 0.359542387  | 0.827336 | 0.27208  |
| #DIV/0!      | ?        | #DIV/0!  |
| #DIV/0!      | ?        | #DIV/0!  |
| -1.169925001 | 0.892135 | -0.16993 |
| #NUM!        | 0.308068 | #NUM!    |
| #DIV/0!      | 0.329316 | #DIV/0!  |
| -2.298523491 | 0.906282 | 0.16843  |
| #NUM!        | 0.18169  | -1.58496 |
| #DIV/0!      | ?        | #DIV/0!  |
| -0.049627654 | 0.874073 | 0.25349  |
| -0.415037499 | 0.680109 | -1       |
| -2.807354922 | 0.855216 | -0.22239 |
| -0.511414719 | 0.894947 | -0.20506 |
| 0.436342202  | 0.720816 | 0.60335  |
| -0.662399294 | 0.936713 | -0.13256 |
| -0.485426827 | 0.914417 | -0.22239 |
| #DIV/0!      | ?        | #DIV/0!  |
| 0            | 0.19041  | 1.58496  |
| -0.801618553 | 0.909464 | 0.16715  |
| -0.664225779 | 0.943644 | 0.10215  |
| 0.662965013  | 0.882707 | -0.26303 |
| -0.083621184 | 0.975552 | -0.05777 |
| -1.362570079 | 0.748435 | -0.58496 |
| #NUM!        | 0.308068 | #NUM!    |
| 1.707138337  | 0.548558 | 1.93359  |
| -1.371968777 | 0.555234 | -1.1375  |
| 0            | 0.866733 | 0.33442  |
| -0.474343328 | 0.771899 | 0.25435  |
| -1.584962501 | 0.513713 | 0.73697  |
| -4.209453366 | 0.345437 | -1.30256 |
| 0.223081552  | 0.921287 | 0.1597   |
| -0.017811276 | 0.62984  | 0.45217  |
| #DIV/0!      | ?        | #DIV/0!  |
| #DIV/0!      | ?        | #DIV/0!  |
| -0.584962501 | 0.727923 | -0.77761 |
| #DIV/0!      | 0.353387 | #DIV/0!  |
| -0.413816921 | 0.896428 | -0.20466 |
| #DIV/0!      | 0.308068 | #DIV/0!  |
| -2.321928095 | 0.541977 | 0.848    |
| -0.709946555 | 0.617676 | -0.31323 |
| -1.584962501 | 0.441678 | -2.16993 |
| 0.00380157   | 0.96544  | 0.07238  |
| #DIV/0!      | ?        | #DIV/0!  |
| -0.044466141 | 0.937332 | 0.15292  |
| 1.115477217  | 0.940721 | -0.26303 |
| 0.338198518  | 0.967133 | 0.08335  |
| #DIV/0!      | ?        | #DIV/0!  |
| -0.206450877 | 0.815746 | 0.32577  |
| #DIV/0!      | ?        | #DIV/0!  |
| #DIV/0!      | ?        | #DIV/0!  |
| 0.063193826  | 0.725386 | 0.40964  |
| #DIV/0!      | ?        | #DIV/0!  |
| #DIV/0!      | ?        | #DIV/0!  |

|              |          |          |
|--------------|----------|----------|
| -0.166009951 | 0.67538  | 0.54969  |
| -0.560714954 | 0.889751 | -0.26793 |
| #DIV/0!      | ?        | #DIV/0!  |
| #DIV/0!      | ?        | #DIV/0!  |
| #DIV/0!      | ?        | #DIV/0!  |
| 0.415037499  | 0.834708 | -0.58496 |
| 0            | 0.710482 | 0.58496  |
| -0.347923303 | 0.709227 | 0.51457  |
| -0.742818331 | 0.975998 | 0.04699  |
| -2.426502686 | 0.930716 | 0.09037  |
| -1           | 0.651448 | -1       |
| #DIV/0!      | ?        | #DIV/0!  |
| -1           | 0.87721  | -0.17509 |
| #DIV/0!      | ?        | #DIV/0!  |
| 1.321928095  | 0.744364 | 0.79256  |
| #DIV/0!      | ?        | #DIV/0!  |
| -1.807354922 | 0.543813 | -0.69188 |
| #DIV/0!      | ?        | #DIV/0!  |
| -0.931468618 | 0.773108 | -0.30256 |
| -0.129234793 | 0.840472 | 0.25204  |
| -0.678261697 | 0.774379 | -0.41605 |
| -0.26100651  | 0.903051 | 0.14761  |
| -0.459431619 | 0.882955 | -0.28951 |
| #DIV/0!      | ?        | #DIV/0!  |
| #DIV/0!      | ?        | #DIV/0!  |
| 0.098302074  | 0.655437 | 0.69188  |
| #DIV/0!      | 0.450185 | #DIV/0!  |
| #DIV/0!      | 1        | #DIV/0!  |
| #NUM!        | 0.495025 | -1.58496 |
| -4.247927513 | 0.414414 | -2.24793 |
| #DIV/0!      | ?        | #DIV/0!  |
| #DIV/0!      | ?        | #DIV/0!  |
| #DIV/0!      | ?        | #DIV/0!  |
| 0.283792966  | 0.725218 | 0.70526  |
| #NUM!        | 0.308068 | #NUM!    |
| #DIV/0!      | ?        | #DIV/0!  |
| -0.362570079 | 0.96703  | 0.078    |
| #NUM!        | 0.308068 | #NUM!    |
| #DIV/0!      | ?        | #DIV/0!  |
| -1.197939378 | 0.777997 | -0.37851 |
| 1.415037499  | 1        | 0        |
| #DIV/0!      | ?        | #DIV/0!  |
| -2           | 0.320255 | #NUM!    |
| 0.847996907  | 0.918711 | -0.32193 |
| #DIV/0!      | ?        | #DIV/0!  |
| #DIV/0!      | ?        | #DIV/0!  |
| #DIV/0!      | ?        | #DIV/0!  |
| -0.765534746 | 0.186081 | 0.77052  |
| -1.662965013 | 0.86612  | -0.24793 |
| -0.160464672 | 0.913232 | -0.20979 |
| -0.359542387 | 0.949804 | -0.11018 |
| -1           | 0.626061 | -1       |
| -0.715732957 | 0.903489 | 0.18265  |
| 0.154907362  | 0.739819 | 0.43309  |
| -1.115477217 | 0.456197 | -2.11548 |
| -0.196771447 | 0.922868 | 0.14335  |

|              |          |          |
|--------------|----------|----------|
| -0.152003093 | 0.957268 | 0.10434  |
| #DIV/0!      | 0.308068 | #DIV/0!  |
| -0.584962501 | 0.833456 | -0.41504 |
| 0.043068722  | 0.903711 | -0.1989  |
| -0.311461096 | 0.240938 | 1.35571  |
| -0.192645078 | 0.84064  | -0.41504 |
| -0.321928095 | 0.741917 | -0.39593 |
| -2.415037499 | 0.895809 | -0.09311 |
| -0.103093493 | 0.689347 | 0.38995  |
| #DIV/0!      | 1        | #DIV/0!  |
| -0.750021747 | 0.945496 | -0.08017 |
| -1.190170025 | 0.808008 | -0.16083 |
| -1.041615126 | 0.577863 | -0.18183 |
| -0.628506005 | 0.955648 | -0.0711  |
| 0.426397125  | 0.699406 | 0.47484  |
| #DIV/0!      | ?        | #DIV/0!  |
| 0.246257548  | 0.982931 | 0.04566  |
| -1           | 0.948164 | -0.12553 |
| #DIV/0!      | ?        | #DIV/0!  |
| -0.153501998 | 0.934336 | 0.09142  |
| #DIV/0!      | 0.450185 | #DIV/0!  |
| #DIV/0!      | ?        | #DIV/0!  |
| #NUM!        | 1        | 0        |
| #DIV/0!      | ?        | #DIV/0!  |
| -1.921106873 | 0.330013 | -5.61951 |
| #DIV/0!      | ?        | #DIV/0!  |
| -2.807354922 | 0.669515 | -0.48543 |
| -1.584962501 | 0.318341 | -1.58496 |
| #DIV/0!      | ?        | #DIV/0!  |
| -1.060235107 | 0.400233 | -0.30991 |
| -0.678071905 | 0.934651 | 0.11548  |
| 0            | 0.450185 | #NUM!    |
| -1.321928095 | 0.685038 | -0.73697 |
| -0.263034406 | 0.781117 | 0.41504  |
| #DIV/0!      | ?        | #DIV/0!  |
| 0.736965594  | 0.764036 | -1       |
| 0.938599455  | 0.92469  | 0.22239  |
| #NUM!        | 0.308068 | #NUM!    |
| 0.649469367  | 0.959087 | -0.10779 |
| #DIV/0!      | ?        | #DIV/0!  |
| #DIV/0!      | 0.758682 | #DIV/0!  |
| #DIV/0!      | ?        | #DIV/0!  |
| #DIV/0!      | ?        | #DIV/0!  |
| 0.294061301  | 0.762164 | 0.38333  |
| 1            | 0.710482 | 1        |
| 0.485426827  | 1        | 0        |
| 0.2410081    | 0.689731 | 0.72643  |
| -1.087462841 | 0.651125 | 0.61298  |
| #DIV/0!      | 0.450185 | #DIV/0!  |
| -0.686707271 | 0.7876   | 0.36676  |
| -3.285402219 | 0.168023 | -3.2854  |
| -0.365246228 | 0.947112 | 0.10607  |
| #DIV/0!      | ?        | #DIV/0!  |
| #DIV/0!      | 0.176946 | #DIV/0!  |
| 0.263034406  | 0.96836  | 0.07039  |
| #DIV/0!      | 0.308068 | #DIV/0!  |



|              |          |          |
|--------------|----------|----------|
| #DIV/0!      | ?        | #DIV/0!  |
| 0            | 0.730374 | 0.63743  |
| -0.315836126 | 0.865931 | -0.3134  |
| 1            | 0.576458 | 1.37851  |
| -0.584962501 | 0.559404 | -1.58496 |
| -0.247927513 | 0.754137 | 0.61005  |
| #NUM!        | 1        | 0        |
| #DIV/0!      | ?        | #DIV/0!  |
| -0.486874019 | 0.698267 | -0.53859 |
| -1.459431619 | 0.367986 | -1.61143 |
| -0.807354922 | 0.950712 | -0.10692 |
| -0.344648171 | 0.985164 | 0.0268   |
| -0.658963082 | 0.79353  | -0.51457 |
| -0.200281712 | 0.894943 | -0.26459 |
| 0.771731012  | 0.636488 | 1        |
| -1           | 0.706667 | -0.58496 |
| 0.251499631  | 0.766512 | 0.4707   |
| -1.366127899 | 0.832641 | -0.38225 |
| 1.222392421  | 0.754229 | -1.58496 |
| -0.736965594 | 0.816484 | -0.41504 |
| -0.084346078 | 0.677258 | 0.65218  |
| -2.321928095 | 0.31594  | #NUM!    |
| #NUM!        | 0.407544 | -2.32193 |
| -1           | 0.912734 | -0.17086 |
| -0.34298971  | 0.9703   | -0.05541 |
| -0.171293165 | 0.830848 | 0.31388  |
| 1            | 0.436998 | 2.32193  |
| #DIV/0!      | ?        | #DIV/0!  |
| -0.818793901 | 0.919867 | 0.11194  |
| -0.100439901 | 0.779142 | 0.3437   |
| -0.356934545 | 0.641348 | -1.10236 |
| -0.933145581 | 0.877912 | -0.20023 |
| 2.801635145  | 0.404899 | 3.23426  |
| #DIV/0!      | ?        | #DIV/0!  |
| -0.173767068 | 0.872246 | 0.17333  |
| 0            | 0.450185 | #NUM!    |
| -1.02531323  | 0.982622 | -0.03309 |
| 1            | 0.943913 | 0.16993  |
| -1.222392421 | 0.907467 | -0.22239 |
| 0.010883484  | 0.928039 | 0.15406  |
| #DIV/0!      | ?        | #DIV/0!  |
| -1.304854582 | 0.562534 | -1       |
| #DIV/0!      | ?        | #DIV/0!  |
| #DIV/0!      | ?        | #DIV/0!  |
| #DIV/0!      | ?        | #DIV/0!  |
| #DIV/0!      | ?        | #DIV/0!  |
| 0.341036918  | 0.628799 | -1.32193 |
| -0.321928095 | 0.695223 | -0.73697 |
| 0            | 0.450185 | #NUM!    |
| 0.584962501  | 0.834708 | 0.32193  |
| #DIV/0!      | 1        | #DIV/0!  |
| #DIV/0!      | 1        | #DIV/0!  |
| #DIV/0!      | ?        | #DIV/0!  |
| -2.702001922 | 0.581527 | -0.93886 |
| -0.737672937 | 0.865051 | -0.22448 |
| -0.736965594 | 0.877286 | -0.23447 |

|              |          |          |
|--------------|----------|----------|
| 1.14332425   | 0.463427 | 2.16873  |
| -0.123382416 | 0.589206 | 0.74169  |
| #DIV/0!      | 0.450185 | #DIV/0!  |
| #NUM!        | 0.308068 | #NUM!    |
| #NUM!        | 0.495025 | -1.58496 |
| -0.220619998 | 0.979537 | 0.03341  |
| #DIV/0!      | ?        | #DIV/0!  |
| -0.099535674 | 0.89252  | -0.20645 |
| 0.584962501  | 0.200976 | 1.58496  |
| #DIV/0!      | 0.450185 | #DIV/0!  |
| #DIV/0!      | 0.308068 | #DIV/0!  |
| -0.302028537 | 0.805041 | -0.32193 |
| 0.029594782  | 0.923761 | 0.17573  |
| -0.672387674 | 0.985211 | -0.02769 |
| -0.514573173 | 0.777535 | -0.51457 |
| -0.526068812 | 0.712847 | -0.77761 |
| -0.712197689 | 0.638206 | -0.98138 |
| -0.241404122 | 0.687876 | 0.4636   |
| -0.377504815 | 0.693608 | 0.41054  |
| #DIV/0!      | ?        | #DIV/0!  |
| #DIV/0!      | ?        | #DIV/0!  |
| #DIV/0!      | 0.308068 | #DIV/0!  |
| -2           | 0.31594  | 1.16993  |
| 2.584962501  | 0.357906 | 2.80735  |
| -0.908207524 | 0.661866 | -0.41153 |
| -0.25276607  | 0.761747 | 0.56768  |
| -0.432227261 | 0.826537 | -0.33665 |
| -2           | 0.791627 | -0.41504 |
| 0.716207034  | 0.959189 | -0.10692 |
| #DIV/0!      | 0.308068 | #DIV/0!  |
| -0.2410081   | 0.630533 | -1.11548 |
| #DIV/0!      | ?        | #DIV/0!  |
| 1            | 0.474021 | 1.58496  |
| #DIV/0!      | ?        | #DIV/0!  |
| #DIV/0!      | ?        | #DIV/0!  |
| #DIV/0!      | ?        | #DIV/0!  |
| 0.485426827  | 0.600305 | 1        |
| -0.395117533 | 0.7146   | 0.44485  |
| -0.79052351  | 0.998884 | 0.00178  |
| -1           | 0.468351 | -1.58496 |
| -0.415037499 | 0.847091 | -0.41504 |
| #NUM!        | 0.308068 | #NUM!    |
| #NUM!        | 0.308068 | #NUM!    |
| #DIV/0!      | ?        | #DIV/0!  |
| -0.065588342 | 0.912068 | 0.16278  |
| 0            | 1        | 0        |
| #DIV/0!      | ?        | #DIV/0!  |
| -1.286728445 | 0.987482 | -0.02137 |
| -0.310340121 | 0.752623 | -0.70627 |
| -0.251538767 | 0.937183 | 0.11103  |
| -0.263034406 | 0.819136 | -0.41504 |
| -0.522286005 | 0.77385  | 0.18939  |
| #NUM!        | 0.308068 | #NUM!    |
| -0.040428426 | 0.88626  | -0.27053 |
| -0.259914545 | 0.955301 | 0.0749   |
| 1.321928095  | 0.775667 | 0.62449  |

|              |             |          |
|--------------|-------------|----------|
| -0.563408358 | 0.917458    | -0.16592 |
| 0.98128774   | 0.349483    | 1.02214  |
| 0.133678435  | 0.707578    | 0.58962  |
| #DIV/0!      | 0.545627    | #DIV/0!  |
| 0.62963155   | 0.867151    | 0.31647  |
| 2.321928095  | 0.706667    | 1.58496  |
| #NUM!        | 1           | 0        |
| 0.054742965  | 0.985821    | 0.03154  |
| -0.332575339 | 0.739203    | -0.5639  |
| 0.163498732  | 0.625449    | 0.848    |
| -1.584962501 | 0.724378    | -0.58496 |
| 2.938599455  | 0.0793556   | 2.5025   |
| -0.048634775 | 0.895957    | 0.20337  |
| -0.316857105 | 0.915711    | 0.15403  |
| 2.266786541  | 0.585779    | 1.90087  |
| 0            | 0.770719    | -0.73697 |
| -0.120294234 | 0.919864    | 0.1635   |
| -1.175849835 | 0.66036     | -0.34577 |
| #DIV/0!      | 0.308068    | #DIV/0!  |
| -0.163448589 | 0.830213    | 0.25374  |
| #NUM!        | 0.308068    | #NUM!    |
| 2.584962501  | 0.561007    | 2.16993  |
| 0.111031312  | 0.826124    | -0.47393 |
| -0.010558858 | 0.906016    | 0.20605  |
| 1            | 0.622002    | #NUM!    |
| #NUM!        | 0.622002    | 1        |
| -0.678071905 | 0.55198     | -1.51457 |
| #DIV/0!      | 0.622002    | #DIV/0!  |
| -1.944858446 | 0.684695    | -0.7122  |
| -2           | 0.734084    | -0.22556 |
| -0.924102383 | 0.846266    | 0.32432  |
| 0.200559914  | 0.360156    | 0.89958  |
| -0.391578526 | 0.923714    | -0.16255 |
| #NUM!        | 1           | 0        |
| #DIV/0!      | ?           | #DIV/0!  |
| #DIV/0!      | ?           | #DIV/0!  |
| -1.263034406 | 0.859253    | 0.22239  |
| 0.514573173  | 0.671354    | 0.89308  |
| -0.906890596 | 0.746258    | -0.58496 |
| -0.479341102 | 0.956794    | -0.0743  |
| #DIV/0!      | ?           | #DIV/0!  |
| -0.215012891 | 0.765921    | -0.65313 |
| #DIV/0!      | 1           | #DIV/0!  |
| #NUM!        | 1           | 0        |
| -1.187627003 | 0.566737    | -0.60266 |
| #NUM!        | 0.308068    | #NUM!    |
| #DIV/0!      | ?           | #DIV/0!  |
| -0.738954147 | 0.882729    | -0.11958 |
| 1.196710749  | 0.173886    | 2.19867  |
| -1.078002512 | 0.949246    | -0.078   |
| 0.649258499  | 0.621463    | 0.87436  |
| #NUM!        | ?           | 16.5968  |
| #NUM!        | ?           | 56.9057  |
| #DIV/0!      | ?           | #DIV/0!  |
| #DIV/0!      | 0.308068    | #DIV/0!  |
| #NUM!        | 0.000187178 | 4.28807  |

|              |          |          |
|--------------|----------|----------|
| #DIV/0!      | ?        | #DIV/0!  |
| -98.91555597 | 0.308068 | -54.8811 |
| 47.87152815  | 0.308467 | 51.9421  |
| -1.298755758 | 0.63743  | -0.33311 |
| 0.654611069  | 0.883651 | -0.4358  |
| -6.5210109   | 0.626879 | 0.98252  |
| -0.586493382 | 0.842867 | -0.34224 |
| #DIV/0!      | ?        | #DIV/0!  |
| -0.744161096 | 0.837506 | 0.27376  |
| -0.557772614 | 0.99555  | -0.00745 |
| -0.085046503 | 0.830224 | -0.4112  |
| -21.08793797 | 0.323899 | -4.72275 |
| #NUM!        | 0.308068 | #NUM!    |
| #DIV/0!      | ?        | #DIV/0!  |
| #NUM!        | ?        | 41.079   |
| -0.552293385 | 0.78542  | -0.46995 |
| 31.02695269  | 1        | 2.17997  |
| -4.518345056 | 0.30845  | -18.44   |
| #DIV/0!      | ?        | #DIV/0!  |
| -1.05621406  | 0.334873 | -1.57892 |
| #DIV/0!      | 0.308068 | #DIV/0!  |
| 10.22572335  | 0.964031 | 5.61183  |
| 46.75213414  | 1        | 21.2526  |
| -1.521340423 | 0.331182 | -31.2391 |
| 0.015589219  | 0.923391 | 0.13681  |
| -1.442916963 | 0.84386  | -0.27299 |
| -0.489914854 | 0.947723 | -0.13427 |
| -2.848249809 | 0.936606 | -0.10565 |
| 0.512032035  | 0.942275 | 0.17451  |
| -10.65522005 | 0.491393 | -1.23009 |
| -1.451107051 | 0.598219 | -0.76487 |
| -1.823443324 | 0.953664 | 0.08246  |
| -1.166358386 | 0.88304  | -0.21527 |
| -27.68583512 | 0.308068 | -38.7637 |
| -0.88336279  | 0.44009  | -0.88227 |
| #NUM!        | ?        | 40.9787  |
| 0.959358016  | 0.894292 | 0.32193  |
| 10.22572335  | 0.964031 | 5.61183  |
| #NUM!        | 0.982631 | 0.03937  |
| -1.360619791 | 0.703823 | 0.74963  |
| #DIV/0!      | ?        | #DIV/0!  |
| #DIV/0!      | ?        | #DIV/0!  |
| #DIV/0!      | ?        | #DIV/0!  |
| -18.35575392 | 0.307785 | -142.48  |
| #NUM!        | 0.308068 | #NUM!    |
| #NUM!        | ?        | #NUM!    |
| -57.39406187 | 0.332623 | -4.12159 |
| -0.141127737 | 0.771074 | 0.36372  |
| -22.15433049 | 0.308068 | -21.8634 |
| -0.725773777 | 0.693377 | 0.46763  |
| -0.095026488 | 0.93092  | -0.19259 |
| -0.86621819  | 0.909977 | 0.13644  |
| -1.015339043 | 0.842645 | 0.38173  |
| -0.287527345 | 0.667477 | -0.43142 |
| #DIV/0!      | 0.308068 | #DIV/0!  |
| 0.36923381   | 0.549744 | 0.54432  |

|              |            |          |
|--------------|------------|----------|
| -1.73584677  | 0.38552    | -0.97786 |
| #NUM!        | 0.308068   | 41.1413  |
| -0.88221761  | 0.626365   | -1.08473 |
| #DIV/0!      | ?          | #DIV/0!  |
| #DIV/0!      | ?          | #DIV/0!  |
| -24.63151566 | 0.315639   | 5.75494  |
| -0.453273556 | 0.912626   | 0.10944  |
| #DIV/0!      | 1          | #DIV/0!  |
| 60.75303075  | 0.323187   | 62.593   |
| -0.8696392   | 0.96686    | 0.05413  |
| -0.550730342 | 0.538594   | -1.75823 |
| -1.111966064 | 0.893026   | 0.24493  |
| #DIV/0!      | 1          | #DIV/0!  |
| -52.44324881 | 0.71784    | -0.69268 |
| 0.206072168  | 0.950379   | 0.13026  |
| #DIV/0!      | 0.308068   | #DIV/0!  |
| -0.258061782 | 0.908549   | -0.23365 |
| -1.68031E-06 | 0.308068   | 25.3145  |
| -12.62713884 | ?          | -3.20792 |
| -73.90029442 | 0.308068   | -111.604 |
| #DIV/0!      | ?          | #DIV/0!  |
| #DIV/0!      | ?          | #DIV/0!  |
| #DIV/0!      | ?          | #DIV/0!  |
| #DIV/0!      | ?          | #DIV/0!  |
| #DIV/0!      | ?          | #DIV/0!  |
| 0.035414682  | 0.312547   | 6.50783  |
| #DIV/0!      | ?          | #DIV/0!  |
| 23.61918655  | 0.308068   | 51.3445  |
| 0.052139884  | 0.891242   | -0.26983 |
| 0.238821182  | 0.975611   | -0.0574  |
| -2.352465489 | 0.708761   | 0.72315  |
| 38.63046273  | 0.999721   | 26.9733  |
| #NUM!        | 0.308068   | 94.4539  |
| 0.690439001  | 0.602436   | 1.06671  |
| 0.023676575  | 0.995939   | -0.00882 |
| -0.838802676 | 0.72871    | 0.34514  |
| #NUM!        | 0.00342458 | -101.696 |
| 0.184429351  | 0.413023   | 1.00848  |
| #NUM!        | ?          | #NUM!    |
| #NUM!        | ?          | -21.7051 |
| #NUM!        | 0.308068   | -56.0015 |
| #DIV/0!      | ?          | #DIV/0!  |
| 0.580404219  | 0.863178   | 0.29157  |
| -0.505827397 | 0.719067   | -0.60804 |
| -85.0832053  | 0.393493   | -2.50683 |
| 0.114399373  | 0.910821   | -0.22707 |
| 1.017944808  | 0.643502   | 1.24538  |
| -21.56340309 | 0.308068   | -71.0745 |
| -0.120811686 | 0.932959   | 0.14087  |
| -0.481310719 | 0.927424   | 0.07738  |
| -0.327784792 | 0.997379   | -0.00539 |
| -1.421058257 | 0.873839   | -0.08472 |
| 0.117872781  | 0.957281   | -0.09612 |
| 6.608956292  | 0.990778   | -13.8034 |
| 10.37268428  | ?          | 46.6367  |
| #DIV/0!      | ?          | #DIV/0!  |

|              |             |          |
|--------------|-------------|----------|
| -0.145727258 | 0.581014    | 0.80137  |
| -0.815457902 | 0.844527    | 0.24777  |
| #DIV/0!      | 1           | #DIV/0!  |
| -4.51845402  | 0.346578    | 3.5194   |
| #NUM!        | 0.308068    | 48.0652  |
| #DIV/0!      | ?           | #DIV/0!  |
| -0.892958622 | 0.956284    | 0.07032  |
| 0.452038782  | 0.921916    | 0.18654  |
| -0.055044287 | 0.882972    | 0.17922  |
| 1            | 0.78878     | 0.73697  |
| 11.25422819  | 0.308082    | 18.1998  |
| -7.604549332 | 0.307922    | 16.7311  |
| -0.506606231 | 0.650059    | 0.95648  |
| -4.741685344 | 0.229531    | -5.14512 |
| 2.048022389  | 0.144441    | 3.1397   |
| 48.90469709  | ?           | 83.9112  |
| 23.4788907   | ?           | 33.1896  |
| #DIV/0!      | 1           | #DIV/0!  |
| #NUM!        | 0.828114    | 0.40064  |
| -57.34386784 | 0.0818245   | 36.5623  |
| -0.333358676 | 0.607118    | 0.17732  |
| -138.7091046 | 0.308068    | #NUM!    |
| #DIV/0!      | 0.308068    | #DIV/0!  |
| -0.766706512 | 0.623269    | -0.82253 |
| #DIV/0!      | ?           | #DIV/0!  |
| 0.400629791  | 0.796033    | 0.50681  |
| #DIV/0!      | ?           | #DIV/0!  |
| 0.099404863  | 0.902384    | -0.29099 |
| #DIV/0!      | ?           | #DIV/0!  |
| 42.84052668  | 1           | -4.56016 |
| -0.442181545 | 0.94556     | -0.12332 |
| -0.477226709 | 0.921531    | -0.11351 |
| #DIV/0!      | ?           | #DIV/0!  |
| #DIV/0!      | 1           | #DIV/0!  |
| 7.662970265  | 0.995558    | -37.6363 |
| -0.840836277 | 0.908151    | -0.18256 |
| -13.49543296 | 0.480474    | -1.21208 |
| -14.46187645 | 0.838857    | 0.32694  |
| -48.99710662 | 0.308068    | -92.1814 |
| -1.88424806  | 0.421172    | -0.93467 |
| #DIV/0!      | ?           | #DIV/0!  |
| #DIV/0!      | ?           | #DIV/0!  |
| -0.551518499 | 0.496465    | -2.15633 |
| -0.009671604 | 0.980762    | 0.04948  |
| -1.261741089 | 0.862698    | -0.08208 |
| -0.062735755 | 0.894586    | 0.17333  |
| -0.892152738 | 0.862251    | 0.27188  |
| -81.89391257 | 0.668128    | 0.84342  |
| #DIV/0!      | 1           | #DIV/0!  |
| #DIV/0!      | ?           | #DIV/0!  |
| -0.321928095 | 0.495025    | 0.48543  |
| -23.85126777 | ?           | 6.44319  |
| -0.359499446 | 0.988649    | 0.01997  |
| -0.975812971 | 0.833954    | -0.35773 |
| #NUM!        | ?           | -55.0056 |
| -5.383986389 | 0.000849274 | -1.86612 |

|              |          |          |
|--------------|----------|----------|
| -0.477208463 | 0.93849  | 0.09763  |
| 0.009486758  | 0.876378 | -0.31654 |
| #NUM!        | 0.308068 | 84.3889  |
| #NUM!        | ?        | 58.0484  |
| 118.0568205  | 1        | 66.6542  |
| -0.233961387 | 0.888443 | -0.22237 |
| -0.626641212 | 0.80844  | 0.44853  |
| 4.93225177   | 0.970539 | -22.554  |
| 0.929341125  | 0.923146 | -0.31561 |
| #DIV/0!      | 0.308068 | #DIV/0!  |
| -0.736965594 | 0.308068 | -3.32193 |
| #DIV/0!      | 0.450185 | #DIV/0!  |
| -0.523102433 | 0.969826 | 0.06236  |
| #DIV/0!      | ?        | #DIV/0!  |
| #NUM!        | ?        | #NUM!    |
| #DIV/0!      | ?        | #DIV/0!  |
| -0.605601187 | 0.883945 | 0.15275  |
| -0.748011216 | 0.867532 | -0.13403 |
| 10.22572335  | 0.964031 | 5.61183  |
| 1.321928095  | 0.622002 | 1.32193  |
| 37.205892    | 1        | -47.7688 |
| -0.39321072  | 0.746193 | -0.70074 |
| 34.40836052  | 1        | -66.5614 |
| -0.888661217 | 0.935653 | 0.07911  |
| #DIV/0!      | ?        | #DIV/0!  |
| #DIV/0!      | ?        | #DIV/0!  |
| #NUM!        | 0.308068 | 79.3188  |
| 60.58268426  | 1        | 6.46154  |
| -0.75438804  | 0.953106 | 0.09286  |
| 1.883966824  | 0.824972 | 0.87593  |
| -0.614807012 | 0.917624 | -0.16101 |
| -2.308944795 | 0.603425 | -0.65618 |
| -0.300312467 | 0.412526 | -9.3164  |
| #DIV/0!      | ?        | #DIV/0!  |
| -0.263034406 | 0.973853 | -0.05247 |
| 0.536429783  | 0.725531 | 0.61352  |
| -0.800822711 | 0.824142 | -0.45408 |
| #DIV/0!      | ?        | #DIV/0!  |
| -1.036426046 | 0.746491 | -0.30728 |
| 0.581187813  | 0.867524 | 0.41341  |
| -33.96789298 | 0.979101 | 0.04738  |
| #DIV/0!      | ?        | #DIV/0!  |
| 10.37268366  | 0.308068 | 72.7872  |
| #DIV/0!      | ?        | #DIV/0!  |
| #NUM!        | ?        | -0.95791 |
| #DIV/0!      | 1        | #DIV/0!  |
| 75.56727953  | ?        | 79.6249  |
| #NUM!        | 0.308063 | 18.3468  |
| -0.623522929 | 0.998392 | 0.00286  |
| -7.482928258 | ?        | -13.0923 |
| #DIV/0!      | ?        | #DIV/0!  |
| #NUM!        | 0.308068 | #NUM!    |
| -3.493932978 | 0.702215 | -0.53797 |
| -0.504270732 | 0.50256  | -0.98682 |
| 51.43041344  | 1        | #NUM!    |
| -1.026306893 | 0.694648 | -0.34685 |

|              |          |          |
|--------------|----------|----------|
| 29.52712551  | 0.308068 | 48.0366  |
| -1.193700775 | 0.343496 | -109.403 |
| 56.00391355  | 0.999993 | 39.0288  |
| -0.552817058 | 0.930113 | 0.1163   |
| #DIV/0!      | ?        | #DIV/0!  |
| #DIV/0!      | ?        | #DIV/0!  |
| #DIV/0!      | ?        | #DIV/0!  |
| #DIV/0!      | ?        | #DIV/0!  |
| #DIV/0!      | ?        | #DIV/0!  |
| #DIV/0!      | 1        | #DIV/0!  |
| 0.02742885   | 0.985839 | -0.0339  |
| -68.49818583 | 0.308068 | -20.4981 |
| #NUM!        | ?        | #NUM!    |
| #DIV/0!      | ?        | #DIV/0!  |
| #DIV/0!      | ?        | #DIV/0!  |
| #DIV/0!      | ?        | #DIV/0!  |
| #DIV/0!      | 0.308068 | #DIV/0!  |
| #DIV/0!      | 0        | #DIV/0!  |
| 0.263034406  | 0.536102 | 1.09311  |
| -0.18967135  | 0.365636 | 0.45642  |
| -5.826909001 | 0.308068 | 37.8661  |
| 0.145040471  | 0.866066 | 0.24045  |
| -1.229263886 | 0.768028 | -0.40721 |
| 22.67672583  | 1        | -6.66464 |
| -0.224180915 | 0.496174 | -2.61279 |
| -0.688514852 | 0.918892 | -0.13585 |
| -0.265849602 | 0.861635 | 0.27475  |
| #DIV/0!      | ?        | #DIV/0!  |
| 9.771881975  | 0.99897  | -23.3387 |
| #NUM!        | ?        | -11.777  |
| 2.542156841  | 0.297701 | 5.58707  |
| -1.845029705 | 0.265124 | -2.46914 |
| 0            | 0.767879 | 0.38702  |
| -0.473021367 | 0.340518 | -3.49181 |
| 50.70681748  | 1        | -2.91261 |
| 35.60198394  | 0.308068 | 76.8207  |
| -0.701939611 | 0.905273 | 0.18302  |
| -0.696014076 | 0.901947 | 0.14586  |
| -65.02495177 | 0.498022 | 1.56689  |
| #NUM!        | 0.308068 | #NUM!    |
| 45.94342836  | 0.308068 | 58.649   |
| 65.57277205  | ?        | 16.9628  |
| #DIV/0!      | ?        | #DIV/0!  |
| 25.34830981  | 1        | #NUM!    |
| 28.33198445  | 0.309459 | 31.9142  |
| -0.973639012 | 0.630808 | -1.08865 |
| 0.148522525  | 0.951432 | 0.11681  |
| #NUM!        | ?        | #NUM!    |
| -100.7225959 | 0.423914 | -2.13855 |
| 22.56973642  | 1        | -11.1962 |
| -0.491870863 | 0.737513 | -0.71713 |
| -12.38526226 | 0.537606 | 1.35156  |
| #DIV/0!      | 1        | #DIV/0!  |
| -0.248920171 | 0.936716 | 0.13721  |
| 0.157302895  | 0.630318 | 0.66455  |
| -0.187627003 | 0.980911 | 0.04333  |



|              |           |          |
|--------------|-----------|----------|
| 0.019628807  | 0.950815  | 0.11396  |
| 10.22572335  | 0.964031  | 5.61183  |
| #NUM!        | 0.344939  | -1.86779 |
| -1.488263055 | 0.0309607 | -1.45291 |
| #DIV/0!      | ?         | #DIV/0!  |
| #NUM!        | ?         | 1.45219  |
| 40.51961637  | 1         | #NUM!    |
| -0.506068692 | 0.944014  | 0.14081  |
| #NUM!        | 0.308068  | #NUM!    |
| -114.982852  | 0.308068  | -103.371 |
| #DIV/0!      | ?         | #DIV/0!  |
| -18.84048722 | ?         | -8.83726 |
| 54.59137357  | 1         | 31.9212  |
| -0.576654434 | 0.624771  | 0.31249  |
| -0.197899386 | 0.961488  | -0.07967 |
| -2.637801752 | 0.579725  | -1.17924 |
| 0.452397254  | 0.605062  | 0.64572  |
| -1.63612784  | 0.450919  | -2.06184 |
| -0.064263844 | 0.915209  | 0.17659  |
| #DIV/0!      | ?         | #DIV/0!  |
| #NUM!        | ?         | #NUM!    |
| #DIV/0!      | ?         | #DIV/0!  |
| 74.67420995  | 1         | #NUM!    |
| #DIV/0!      | ?         | #DIV/0!  |
| #DIV/0!      | 0.308068  | #DIV/0!  |
| -0.101793087 | 0.923501  | 0.15784  |
| -0.967670982 | 0.454419  | -1.97756 |
| 0.491920365  | 0.173817  | 1.6671   |
| #NUM!        | 0.308068  | -26.4446 |
| #DIV/0!      | 0.308068  | #DIV/0!  |
| #NUM!        | 0.308068  | #NUM!    |
| #DIV/0!      | 1         | #DIV/0!  |
| #DIV/0!      | ?         | #DIV/0!  |
| #NUM!        | 0.308068  | #NUM!    |
| -1.738334886 | 0.193128  | -6.72222 |
| 0.295242987  | 0.84457   | 0.34134  |
| 0.291766124  | 0.917433  | 0.18203  |
| 0.264647257  | 0.85357   | 0.28068  |
| -0.439981161 | 0.816078  | -0.43178 |
| #DIV/0!      | 1         | #DIV/0!  |
| -1.969158157 | 0.195013  | -0.64157 |
| -1           | 0.353387  | #NUM!    |
| 0            | 0.898872  | 0.21299  |
| 0.689531438  | 0.662295  | 0.76462  |
| -0.012634463 | 0.65987   | 0.75295  |
| -0.35410186  | 0.822126  | 0.1673   |
| -1.321175394 | 0.606617  | -0.67724 |
| -20.11914454 | 0.308068  | -130.59  |
| 0            | 0.308068  | 28.2295  |
| -0.282091005 | 0.885134  | 0.18508  |
| #DIV/0!      | ?         | #DIV/0!  |
| -0.429749851 | 0.854814  | -0.31427 |
| #NUM!        | 0.622002  | 1        |
| -0.33834217  | 0.939112  | 0.08947  |
| -0.293467333 | 0.826882  | 0.19766  |
| 0.865914669  | 0.398605  | 0.99886  |

|              |           |          |
|--------------|-----------|----------|
| #DIV/0!      | ?         | #DIV/0!  |
| 4.970379208  | 0.971306  | #NUM!    |
| #NUM!        | ?         | -28.5012 |
| #DIV/0!      | 0.308068  | #DIV/0!  |
| #DIV/0!      | ?         | #DIV/0!  |
| 50.11330725  | 1         | #NUM!    |
| #DIV/0!      | ?         | #DIV/0!  |
| #DIV/0!      | 1         | #DIV/0!  |
| #DIV/0!      | ?         | #DIV/0!  |
| #NUM!        | ?         | #NUM!    |
| #DIV/0!      | ?         | #DIV/0!  |
| -0.434250048 | 0.897934  | -0.20297 |
| -0.653283977 | 0.958479  | -0.084   |
| #DIV/0!      | 0.622002  | #DIV/0!  |
| -0.926082766 | 0.86951   | 0.24823  |
| 27.50047559  | 0.0128563 | 28.5453  |
| #DIV/0!      | 0.308068  | #DIV/0!  |
| #NUM!        | ?         | #NUM!    |
| -1           | 0.353387  | #NUM!    |
| #NUM!        | 0.308068  | #NUM!    |
| 4.251420059  | 0.335943  | 5.82453  |
| -0.987509056 | 0.846699  | -0.3377  |
| -0.632591364 | 0.921604  | -0.14074 |
| -0.790687845 | 0.998921  | 0.00147  |
| #DIV/0!      | ?         | #DIV/0!  |
| -106.0381993 | 0.308068  | -50.9564 |
| -2.084064265 | 0.665048  | -0.59864 |
| 0.008096916  | 0.45133   | -52.593  |
| -0.292998708 | 0.912805  | 0.17679  |
| -0.581821642 | 0.975847  | -0.05464 |
| -0.276171344 | 0.978341  | 0.04381  |
| -0.61267572  | 0.708746  | 0.19483  |
| -22.29933636 | 0.308068  | -29.1353 |
| -0.418984684 | 0.991372  | 0.01178  |
| #DIV/0!      | ?         | #DIV/0!  |
| #DIV/0!      | ?         | #DIV/0!  |
| -0.027783982 | 0.701163  | 0.82952  |
| 4.471914813  | 0.516217  | 4.18662  |
| 60.64825795  | ?         | #NUM!    |
| 1.822579651  | 0.581455  | 1.82042  |
| #DIV/0!      | 0.308068  | #DIV/0!  |
| #DIV/0!      | ?         | #DIV/0!  |
| 99.03828898  | 1         | #NUM!    |
| 4.789750064  | ?         | #NUM!    |
| -7.685693893 | 0.328524  | -4.37056 |
| #DIV/0!      | ?         | #DIV/0!  |
| -95.6637586  | 0.308068  | -71.4468 |
| #DIV/0!      | ?         | #DIV/0!  |
| -29.40113321 | ?         | -0.56291 |
| 51.70738256  | 1         | -4.95478 |
| #NUM!        | 0.308068  | #NUM!    |
| #DIV/0!      | ?         | #DIV/0!  |
| #NUM!        | 0.308068  | #NUM!    |
| #NUM!        | ?         | -26.6518 |
| -30.34421344 | 0.308068  | -27.0291 |
| -0.144300528 | 0.630812  | 0.59544  |

|              |          |          |
|--------------|----------|----------|
| -2.31189044  | 0.971079 | -0.04841 |
| -1.003282824 | 0.75008  | -0.35681 |
| 0.10975068   | 0.989169 | 0.02625  |
| -0.142811707 | 0.788196 | 0.32078  |
| -44.74440466 | ?        | 22.9028  |
| #DIV/0!      | 0.308068 | #DIV/0!  |
| -51.5652379  | ?        | -29.7754 |
| #DIV/0!      | ?        | #DIV/0!  |
| -73.90029424 | 0.308068 | -37.6363 |
| #NUM!        | ?        | #NUM!    |
| 0.054124402  | 0.770276 | -0.75318 |
| #DIV/0!      | ?        | #DIV/0!  |
| #NUM!        | 0.308068 | #NUM!    |
| 1.7278123    | 0.917419 | 0.42367  |
| #NUM!        | ?        | #NUM!    |
| #DIV/0!      | 0.308068 | #DIV/0!  |
| #NUM!        | 0.308068 | #NUM!    |
| #DIV/0!      | ?        | #DIV/0!  |
| #DIV/0!      | ?        | #DIV/0!  |
| #DIV/0!      | ?        | #DIV/0!  |
| #NUM!        | ?        | 9.0843   |
| 0.011791733  | 0.847577 | 0.34777  |
| 0.203155688  | 0.784149 | 0.40278  |
| 0.790906859  | 0.583292 | #NUM!    |
| -1.951616505 | 0.925146 | 0.17134  |
| 0            | 0.308068 | 25.3145  |
| 0            | 0.450185 | #NUM!    |
| #DIV/0!      | 1        | #DIV/0!  |
| -0.129344419 | 0.916194 | 0.17713  |
| #DIV/0!      | ?        | #DIV/0!  |
| #NUM!        | 0.304813 | 1.00592  |
| -0.446441532 | 0.923281 | -0.11225 |
| #NUM!        | 0.308068 | #NUM!    |
| -0.939239114 | 0.970682 | 0.0161   |
| -22.97235335 | 0.305549 | -1.43336 |
| -0.280164045 | 0.414194 | -14.3751 |
| -0.36923381  | 0.759877 | -0.31034 |
| #NUM!        | ?        | #NUM!    |
| -0.24479636  | 0.98598  | 0.03271  |
| -9.286718892 | 0.316823 | -5.34592 |
| 2.321928095  | 0.567924 | 2        |
| #DIV/0!      | ?        | #DIV/0!  |
| -0.462971976 | 0.973225 | -0.02857 |
| 10.37268205  | 0.308068 | 46.6367  |
| -0.134364578 | 0.827816 | 0.34818  |
| -2.111503996 | 0.496914 | 0.7415   |
| -0.530806698 | 0.915221 | 0.21244  |
| -0.248005686 | 0.878712 | -0.33438 |
| 0.308122295  | 0.704882 | 0.60768  |
| 36.23925898  | 0.308068 | 58.3813  |
| -0.622007397 | 0.202011 | 1.17213  |
| -0.273884926 | 0.943329 | -0.13501 |
| 0.031566987  | 0.965689 | 0.07589  |
| 3.562038748  | 0.897323 | -3.07192 |
| #DIV/0!      | 0.308068 | #DIV/0!  |
| 17.69296946  | 0.999996 | #NUM!    |

|              |           |          |
|--------------|-----------|----------|
| #DIV/0!      | ?         | #DIV/0!  |
| #NUM!        | 0.308068  | #NUM!    |
| #DIV/0!      | 0.308068  | #DIV/0!  |
| -38.1552332  | 0.308068  | 57.6381  |
| -6.407911378 | 0.966776  | -0.0433  |
| 10.37268368  | ?         | 46.6367  |
| 39.8493534   | 0.308068  | 112.054  |
| #DIV/0!      | ?         | #DIV/0!  |
| #DIV/0!      | ?         | #DIV/0!  |
| #NUM!        | ?         | #NUM!    |
| #DIV/0!      | 1         | #DIV/0!  |
| -0.40738214  | 0.664681  | -1.02106 |
| #DIV/0!      | ?         | #DIV/0!  |
| 23.57698732  | 1         | -26.8134 |
| #NUM!        | 0.308068  | #NUM!    |
| 51.45112018  | ?         | -18.585  |
| #DIV/0!      | ?         | #DIV/0!  |
| -125.5878573 | 0.316874  | 5.54178  |
| #DIV/0!      | ?         | #DIV/0!  |
| #NUM!        | ?         | 71.622   |
| -0.928357256 | 0.739073  | -0.51101 |
| 0.044394119  | 0.778661  | 0.35755  |
| -0.836128282 | 0.73173   | -0.56319 |
| 0.062357997  | 0.956689  | 0.12014  |
| -0.480169079 | 0.96127   | -0.07992 |
| -0.031472666 | 0.977859  | -0.04943 |
| #DIV/0!      | ?         | #DIV/0!  |
| 0.516746424  | 0.508085  | 0.45251  |
| 0            | 0.450185  | #NUM!    |
| -0.79157611  | 0.951186  | 0.08123  |
| #NUM!        | 0.311787  | -6.76325 |
| -0.104218628 | 0.347634  | -15.9131 |
| #DIV/0!      | ?         | #DIV/0!  |
| #DIV/0!      | ?         | #DIV/0!  |
| -0.484064294 | 0.964281  | 0.0484   |
| #NUM!        | 1         | 0        |
| #DIV/0!      | ?         | #DIV/0!  |
| #DIV/0!      | ?         | #DIV/0!  |
| #DIV/0!      | 1         | #DIV/0!  |
| 0.007316505  | 0.99781   | 0.00453  |
| -1.362570079 | 0.403716  | -0.922   |
| -0.432770585 | 0.917974  | -0.15536 |
| -47.98405242 | 0.308068  | -72.9537 |
| #DIV/0!      | ?         | #DIV/0!  |
| 22.93733058  | 0.999641  | 11.6441  |
| -1           | 1         | 0        |
| 0.485426827  | 0.342872  | -2.32193 |
| 0            | 0.450185  | #NUM!    |
| #NUM!        | ?         | 6.54462  |
| -96.73582736 | 0.392446  | -2.52194 |
| -1.472498587 | 0.614642  | -0.95403 |
| 10.32551727  | 0.99809   | 1.89607  |
| -0.317822542 | 0.769028  | -0.67648 |
| -2.581611227 | 0.0451769 | -2.54104 |
| -0.401356951 | 0.838117  | 0.41432  |
| -0.591535155 | 0.840938  | -0.35509 |

|              |           |          |
|--------------|-----------|----------|
| 4.039741712  | 0.585537  | 2.76226  |
| -1.743847837 | 0.747385  | -0.16814 |
| #DIV/0!      | 1         | #DIV/0!  |
| -0.849338485 | 0.59263   | -1.29273 |
| #NUM!        | 0.0704451 | #NUM!    |
| -11.37940199 | 0.313508  | 6.22238  |
| -0.329913832 | 0.408553  | #NUM!    |
| #NUM!        | 0.308068  | #NUM!    |
| -1.778955046 | 0.5008    | -0.81423 |
| -0.42003818  | 0.822615  | 0.28177  |
| 0.882230295  | 0.589578  | 0.66772  |
| 0.568985213  | 0.858621  | 0.41626  |
| 0.036680663  | 0.935613  | -0.14994 |
| 0.235692637  | 0.972661  | 0.07013  |
| #DIV/0!      | ?         | #DIV/0!  |
| #DIV/0!      | ?         | #DIV/0!  |
| -68.87226825 | 0.308068  | -105.497 |
| 33.87219982  | 0.309671  | 37.3515  |
| #NUM!        | 0.313065  | 6.34403  |
| -0.099779397 | 0.915557  | -0.16641 |
| -0.039477035 | 0.988889  | -0.03067 |
| -0.298086154 | 0.927429  | 0.13496  |
| -1.947865971 | 0.479754  | -0.3478  |
| -101.3975974 | 0.329319  | 4.31811  |
| -1.399903328 | 0.802068  | -0.39412 |
| -4.415980017 | 0.308069  | 18.7435  |
| -0.465863618 | 0.965786  | -0.06736 |
| -0.112596784 | 0.832344  | 0.25867  |
| -0.022156445 | 0.822579  | -0.34118 |
| #DIV/0!      | ?         | #DIV/0!  |
| -0.668197042 | 0.958194  | 0.05891  |
| -0.552773547 | 0.962503  | -0.04607 |
| -101.3501171 | 0.308068  | -56.0015 |
| #NUM!        | ?         | -8.67927 |
| -28.84313517 | 0.314359  | -6.01693 |
| #DIV/0!      | ?         | #DIV/0!  |
| #NUM!        | ?         | #NUM!    |
| 1.137503524  | 0.821423  | -0.73697 |
| -0.734877201 | 0.623033  | 0.21654  |
| 0.663355501  | 0.854383  | 0.42017  |
| #NUM!        | ?         | #NUM!    |
| 6.094308281  | 0.437396  | 6.22981  |
| -0.22060181  | 0.656583  | 0.37837  |
| 1.321928095  | 0.872331  | 0.48543  |
| -0.103273372 | 0.216747  | -34.1313 |
| #NUM!        | 0.209509  | -8.69841 |
| #NUM!        | 0.308068  | #NUM!    |
| #DIV/0!      | 0.308068  | #DIV/0!  |
| -1.155753256 | 0.765335  | -0.42446 |
| -0.552822742 | 0.785752  | -0.40666 |
| #DIV/0!      | ?         | #DIV/0!  |
| #DIV/0!      | ?         | #DIV/0!  |
| -106.2239021 | 0.856672  | 0.28229  |
| #NUM!        | 0.308068  | #NUM!    |
| #NUM!        | 0.308068  | 49.9125  |
| #DIV/0!      | ?         | #DIV/0!  |

|              |          |          |
|--------------|----------|----------|
| #NUM!        | 0.308051 | 69.3398  |
| -0.311328554 | 0.901089 | 0.19861  |
| -1.400107899 | 0.915762 | 0.19808  |
| -2.019115451 | 0.308068 | 39.0676  |
| -0.238586962 | 0.889074 | 0.24178  |
| 0.659174474  | 0.673362 | -1.82761 |
| #NUM!        | ?        | #NUM!    |
| -5.647231594 | 0.308068 | 22.092   |
| -3.575647861 | 0.309471 | #NUM!    |
| -0.415037499 | 0.523243 | -2       |
| -1.087462841 | 0.213405 | -1.08746 |
| -0.318228411 | 0.739298 | -0.78447 |
| -0.157638628 | 0.849311 | 0.28605  |
| 0.556110786  | 0.938569 | 0.16802  |
| #DIV/0!      | 1        | #DIV/0!  |
| 37.48991456  | ?        | 43.5572  |
| 20.63469506  | 0.999999 | -83.457  |
| #NUM!        | 0.308068 | -100.472 |
| #DIV/0!      | ?        | #DIV/0!  |
| 0            | 0.450185 | #NUM!    |
| -0.04766849  | 0.813769 | -0.4698  |
| -0.525394338 | 0.388607 | -17.5978 |
| #NUM!        | 0.795129 | -0.48347 |
| 0.184168434  | 0.902564 | 0.20942  |
| -0.378957612 | 0.971203 | -0.07478 |
| -3.214797668 | 0.354643 | 3.27184  |
| -0.625134512 | 0.995476 | 0.00694  |
| 9.77188749   | 0.99897  | #NUM!    |
| #DIV/0!      | ?        | #DIV/0!  |
| -0.469977347 | 0.90103  | 0.1192   |
| -0.422236392 | 0.995337 | -0.00897 |
| -1.74387968  | 0.49708  | -0.49893 |
| #NUM!        | ?        | 6.54462  |
| #NUM!        | 0.308068 | 136.436  |
| -0.828186456 | 0.349351 | -4.24818 |
| 2.274505501  | 0.783897 | 1.18169  |
| -0.334419039 | 0.835871 | 0.35147  |
| #DIV/0!      | ?        | #DIV/0!  |
| -2.807354922 | 1        | 0        |
| -0.497499659 | 0.965118 | -0.0614  |
| 0            | 0.47668  | 1.80735  |
| -1.874469118 | 0.566538 | -1.1375  |
| -0.485318235 | 0.901211 | 0.17324  |
| -0.488168426 | 0.858064 | 0.15733  |
| -0.917324943 | 0.714147 | -0.22264 |
| -0.203533394 | 0.933739 | -0.14639 |
| #DIV/0!      | ?        | #DIV/0!  |
| 1.893084796  | 0.595501 | 1.65208  |
| -1.0048494   | 0.956456 | -0.08218 |
| -0.638523094 | 0.963845 | 0.06436  |
| -0.321928095 | 0.866773 | -0.32193 |
| -0.741095738 | 0.995883 | 0.00848  |
| -1.173242032 | 0.610881 | 0.25127  |
| 0.649092838  | 0.755393 | 0.58496  |
| 0.564498398  | 0.886226 | 0.28279  |
| -0.565379632 | 0.962266 | 0.05797  |

|              |          |          |
|--------------|----------|----------|
| -2.807354922 | 0.236154 | 0.65208  |
| #DIV/0!      | ?        | #DIV/0!  |
| -2.873030377 | 0.436032 | -2.05584 |
| -2.807354922 | 0.610398 | -0.80735 |
| 0.202308175  | 0.965904 | 0.0902   |
| -2.31189044  | 0.971079 | -0.04841 |
| -2.31189044  | 0.971079 | -0.04841 |
| -2.31189044  | 0.971079 | -0.04841 |
| 2.782970612  | 0.897038 | -2.31618 |
| -2.31189044  | 0.971079 | -0.04841 |
| -2.31189044  | 0.971079 | -0.04841 |
| -9.266945151 | 0.208023 | 2.37975  |
| -2.31189044  | 0.971079 | -0.04841 |
| -2.31189044  | 0.971079 | -0.04841 |
| -2.31189044  | 0.971079 | -0.04841 |
| -0.916984921 | 0.944458 | -0.06675 |
| -2.31189044  | 0.971079 | -0.04841 |
| 0.343193904  | 0.932412 | -0.20866 |
| -0.548789602 | 0.834252 | -0.39639 |
| 0.096309389  | 0.837562 | 0.38541  |
| 0.09940313   | 0.760042 | -0.75425 |
| -2.250140199 | 0.674862 | -0.7763  |
| -78.34959129 | 0.308068 | -71.004  |
| -0.355823567 | 0.945594 | 0.09639  |
| -0.584596993 | 0.817199 | 0.33446  |
| -2.31189044  | 0.971079 | -0.04841 |
| -2.31189044  | 0.971079 | -0.04841 |
| -2.31189044  | 0.971079 | -0.04841 |
| -11.80664197 | ?        | -7.97316 |
| -0.532741472 | 0.957394 | -0.06874 |
| -0.841242917 | 0.330766 | -75.9826 |
| -1.544320516 | 1        | 0        |
| -1.341889827 | 0.90535  | -0.18245 |
| -1.583786231 | 0.870549 | -0.26115 |
| 1.951878149  | 0.139218 | 1.49989  |
| -16.65657751 | 0.308068 | 28.2359  |
| -0.28337628  | 0.589048 | 0.799    |
| -0.41287247  | 0.978686 | 0.0419   |
| #DIV/0!      | ?        | #DIV/0!  |
| -0.515614454 | 0.834945 | 0.25634  |
| #DIV/0!      | ?        | #DIV/0!  |
| #DIV/0!      | 0.308068 | #DIV/0!  |
| #DIV/0!      | 0.308068 | #DIV/0!  |
| #DIV/0!      | ?        | #DIV/0!  |
| 0.153805336  | 0.884605 | 0.22497  |
| -0.49180983  | 0.892617 | -0.23398 |
| -0.166649869 | 0.95175  | -0.10893 |
| -1           | 0.969113 | -0.05658 |
| -1           | 0.514418 | 1.16993  |
| 0.098303195  | 0.991548 | 0.02395  |
| 0            | 0.927519 | 0.14142  |
| 0.088227183  | 0.923001 | -0.1945  |
| #DIV/0!      | 0.308068 | #DIV/0!  |
| 59.94626826  | 0.852217 | 57.3725  |
| -1.041820176 | 0.775082 | 0.42531  |
| 0.846990467  | 0.579419 | 1.13593  |

|              |            |          |
|--------------|------------|----------|
| #DIV/0!      | ?          | #DIV/0!  |
| -1.230297619 | 0.942505   | -0.08944 |
| 0.556393349  | 0.748768   | 0.61298  |
| #NUM!        | 0.308068   | #NUM!    |
| #DIV/0!      | 0          | #DIV/0!  |
| -0.462159154 | 0.953404   | -0.10304 |
| #DIV/0!      | ?          | #DIV/0!  |
| #DIV/0!      | ?          | #DIV/0!  |
| -0.703018262 | 0.970888   | 0.06054  |
| #DIV/0!      | ?          | #DIV/0!  |
| -0.192645078 | 0.944227   | -0.11924 |
| #DIV/0!      | ?          | #DIV/0!  |
| #DIV/0!      | ?          | #DIV/0!  |
| #DIV/0!      | ?          | #DIV/0!  |
| #DIV/0!      | ?          | #DIV/0!  |
| 1.584962501  | 0.559404   | 1.58496  |
| #NUM!        | 0.198892   | 1.32193  |
| -2.848249809 | 0.936606   | -0.10565 |
| -2.848249809 | 0.936606   | -0.10565 |
| 22.93733058  | 0.999641   | 11.6441  |
| 4.251420059  | 0.316198   | 5.86077  |
| -0.457137783 | 0.91428    | -0.17785 |
| #DIV/0!      | ?          | #DIV/0!  |
| #DIV/0!      | ?          | #DIV/0!  |
| #DIV/0!      | 1          | #DIV/0!  |
| #DIV/0!      | 1          | #DIV/0!  |
| -0.415037499 | 0.855216   | 0.32193  |
| #DIV/0!      | ?          | #DIV/0!  |
| #DIV/0!      | ?          | #DIV/0!  |
| -0.193724536 | 0.964566   | 0.0592   |
| #DIV/0!      | ?          | #DIV/0!  |
| #DIV/0!      | ?          | #DIV/0!  |
| #DIV/0!      | 0.308068   | #DIV/0!  |
| #NUM!        | 0.622002   | 1        |
| -2           | 0.825659   | -0.41504 |
| 0.116409492  | 0.913427   | 0.21719  |
| 1.295455884  | 0.729943   | 0.8625   |
| #DIV/0!      | ?          | #DIV/0!  |
| -0.258016331 | 0.552158   | 0.51809  |
| -0.03926381  | 0.985147   | 0.03451  |
| #DIV/0!      | ?          | #DIV/0!  |
| #DIV/0!      | ?          | #DIV/0!  |
| -1.237345713 | 0.639826   | -0.66196 |
| -1           | 0.353387   | #NUM!    |
| -27.54485753 | 0.308068   | -32.6677 |
| -0.290595002 | 0.918612   | -0.15418 |
| 0.065489134  | 0.474132   | 1.20682  |
| 0.588923316  | 0.200962   | 2.19328  |
| 1            | 0.912416   | 0.32193  |
| -0.725140159 | 0.92046    | 0.18371  |
| -0.839389547 | 0.00593899 | 3.34596  |
| -0.32979651  | 0.81219    | -0.53051 |
| -0.814710124 | 0.96744    | 0.07713  |
| -0.560761695 | 0.72727    | -0.7838  |
| 0.040398101  | 0.954261   | 0.09073  |
| -0.348929952 | 0.898528   | -0.2447  |



|              |          |          |
|--------------|----------|----------|
| -0.549540999 | 0.874225 | 0.24174  |
| 0            | 0.450185 | #NUM!    |
| -2.321928095 | 0.862169 | -0.32193 |
| #DIV/0!      | 1        | #DIV/0!  |
| -0.381090167 | 0.906101 | 0.19265  |
| #DIV/0!      | 0.308068 | #DIV/0!  |
| -0.866733469 | 0.607509 | -1.14684 |
| -0.415037499 | 0.523243 | -2       |
| -2.325550199 | 0.524968 | -1.33534 |
| #DIV/0!      | ?        | #DIV/0!  |
| -0.5776945   | 0.928773 | -0.16856 |
| -1.181297889 | 0.642468 | -0.67147 |
| #DIV/0!      | ?        | #DIV/0!  |
| #DIV/0!      | ?        | #DIV/0!  |
| #DIV/0!      | ?        | #DIV/0!  |
| -0.261328084 | 0.885437 | -0.2716  |
| -1           | 0.72755  | -0.58496 |
| -0.777607579 | 0.492814 | -1       |
| -2.04580369  | 0.573214 | -0.53239 |
| -0.341434409 | 0.958259 | 0.07266  |
| -1.294890713 | 0.359757 | -0.94501 |
| #NUM!        | 0.710482 | -0.58496 |
| -0.336413446 | 0.685872 | -0.9971  |
| #DIV/0!      | 0.338084 | #DIV/0!  |
| -1.116806854 | 0.435566 | -1.07919 |
| 1.435104386  | 0.75222  | 0.84407  |
| -0.260228748 | 0.888932 | 0.22184  |
| -0.105426354 | 0.887398 | 0.19657  |
| -0.134491308 | 0.931877 | 0.13679  |
| -0.411080646 | 0.482741 | 0.68469  |
| 0            | 0.450185 | #NUM!    |
| #DIV/0!      | ?        | #DIV/0!  |
| -0.906890596 | 0.818901 | 0.20462  |
| 4.534977842  | 0.973477 | -1.59564 |
| -0.858799831 | 0.931192 | 0.08881  |
| -0.890836557 | 0.995999 | -0.00631 |
| 0.415037499  | 0.490213 | 1.41504  |
| -0.662355679 | 0.879621 | 0.18693  |
| -0.78004122  | 0.830518 | 0.21338  |
| -1.716690029 | 0.864217 | -0.10546 |
| 0.184424571  | 0.880316 | -0.37197 |
| -0.828631582 | 0.634753 | -0.80573 |
| -0.337869639 | 0.949852 | -0.11548 |
| -85.63491304 | 0.5857   | 1.13795  |
| -0.964917541 | 0.887706 | -0.18442 |
| -0.736965594 | 0.662394 | -1       |
| #DIV/0!      | ?        | #DIV/0!  |
| 1.999999134  | 0.622002 | 1        |
| -0.123184763 | 0.98882  | -0.02606 |
| 60.70726644  | 0.308311 | 65.4239  |
| #DIV/0!      | 0.329316 | #DIV/0!  |
| 0.749785774  | 0.988266 | -0.02328 |
| 0.435501602  | 0.932255 | 0.18057  |
| -0.514573173 | 0.942676 | 0.1375   |
| -1.360822946 | 0.593788 | -0.58627 |
| -0.528694281 | 0.767841 | -0.60145 |



|              |          |          |
|--------------|----------|----------|
| 33.38713139  | 1        | -95.4814 |
| -0.179580078 | 0.869971 | 0.1722   |
| 1            | 1        | 0        |
| #NUM!        | 0.308068 | #NUM!    |
| -0.467414204 | 0.80906  | 0.24702  |
| #DIV/0!      | ?        | #DIV/0!  |
| 2.305484192  | 0.466802 | 2.19219  |
| 0.957771765  | 0.742834 | 0.69188  |
| -0.745821598 | 0.817002 | 0.18246  |
| -0.045748382 | 0.900317 | 0.18992  |
| #DIV/0!      | ?        | #DIV/0!  |
| -1.485426827 | 0.286561 | -1.48543 |
| -0.875218945 | 0.915922 | 0.12772  |
| -1.05857095  | 0.691684 | -0.84392 |
| -1.906890596 | 0.793312 | -0.32193 |
| -0.177282682 | 0.821172 | -0.52104 |
| 1.999999134  | 0.622002 | 1        |
| 1.999999134  | 0.622002 | 1        |
| #DIV/0!      | 0.308068 | #DIV/0!  |
| -101.5798742 | 0.308068 | -82.8283 |
| -0.246328128 | 0.667494 | 0.917    |
| -1.415037499 | 0.483296 | -0.77761 |
| -0.713034411 | 0.331422 | -16.623  |
| -2.767962776 | 0.28232  | 7.96834  |
| -0.263034406 | 0.7555   | -0.58496 |
| 0.03123072   | 0.885593 | 0.26801  |
| #DIV/0!      | ?        | #DIV/0!  |
| 0.092258508  | 1        | 0        |
| -0.584962501 | 0.637618 | 0.73697  |
| 0.00184178   | 0.773781 | -0.72511 |
| 0.218953337  | 0.940371 | 0.14477  |
| -1           | 0.353387 | #NUM!    |
| -0.345644164 | 0.976553 | -0.04783 |
| -0.807028812 | 0.836923 | -0.36541 |
| -0.171952683 | 0.826822 | -0.49845 |
| 0.452512205  | 0.88367  | 0.31686  |
| 0.118428265  | 0.651025 | -0.88034 |
| 0.529015356  | 0.935997 | -0.17771 |
| 10.46067147  | ?        | -25.5816 |
| #DIV/0!      | ?        | #DIV/0!  |
| -0.599037686 | 0.890742 | -0.21077 |
| 1.584962501  | 1        | 0        |
| -0.271959636 | 0.936473 | -0.14707 |
| 0.147557188  | 0.673371 | 0.46949  |
| -0.769481682 | 0.765805 | -0.33795 |
| -0.308676637 | 0.786389 | -0.52864 |
| 0            | 0.651448 | 1        |
| -0.847996907 | 0.947078 | -0.11103 |
| -58.42543178 | 0.944007 | -0.09276 |
| #DIV/0!      | 0.622002 | #DIV/0!  |
| 1.584962501  | 0.236154 | 2.32193  |
| 0.026391499  | 0.992462 | -0.01787 |
| #NUM!        | 0.308068 | #NUM!    |
| -0.2410081   | 0.865742 | 0.20645  |
| -0.27506149  | 0.931447 | -0.13696 |
| 0.243669081  | 0.942857 | 0.13225  |

|              |           |          |
|--------------|-----------|----------|
| -0.628031223 | 0.892874  | 0.19052  |
| #DIV/0!      | ?         | #DIV/0!  |
| #DIV/0!      | ?         | #DIV/0!  |
| #NUM!        | 0.308068  | #NUM!    |
| #DIV/0!      | 0.308068  | #DIV/0!  |
| -4.175486071 | 0.845621  | 0.30656  |
| #DIV/0!      | ?         | #DIV/0!  |
| -0.276385244 | 0.816906  | 0.37032  |
| 0.092480916  | 0.987706  | 0.02985  |
| -1           | 0.0917211 | #NUM!    |
| #DIV/0!      | ?         | #DIV/0!  |
| -0.410788026 | 0.959301  | 0.08069  |
| -0.425990027 | 0.87878   | -0.29875 |
| 55.95072002  | 0.683949  | 54.6068  |
| -0.542068419 | 0.522154  | -0.97404 |
| -8.804163909 | 0.30838   | 10.3283  |
| 0            | 1         | 0        |
| -0.242035438 | 0.631613  | -1.30529 |
| -0.004053083 | 0.9985    | 0.00416  |
| 0.465663572  | 0.83463   | 0.36257  |
| 0.178733459  | 0.827935  | 0.35339  |
| #NUM!        | 0.495025  | 1.58496  |
| 0.020177882  | 0.832628  | 0.42011  |
| 0.329876848  | 0.927659  | 0.17258  |
| -0.184424571 | 0.995668  | 0.00959  |
| #DIV/0!      | ?         | #DIV/0!  |
| -0.77179906  | 0.712608  | -0.61428 |
| -0.613680656 | 0.646705  | 0.38364  |
| -0.700439718 | 0.674091  | -0.70044 |
| -1.09197749  | 0.812122  | -0.07068 |
| -1.579668201 | 0.811158  | -0.40798 |
| -0.978535491 | 0.73397   | -0.60518 |
| -0.965648495 | 0.773671  | -0.4863  |
| -1.138573149 | 0.915858  | 0.14173  |
| -1.086094042 | 0.843296  | 0.24788  |
| #DIV/0!      | 0.308068  | #DIV/0!  |
| 0.167727446  | 0.931859  | -0.16746 |
| -2.2969393   | 0.790433  | -0.34647 |
| -0.334009783 | 0.967237  | -0.05999 |
| 0.754887502  | 0.324456  | 1.35755  |
| #DIV/0!      | ?         | #DIV/0!  |
| -2.048358236 | 0.543591  | -1.33322 |
| #DIV/0!      | ?         | #DIV/0!  |
| -0.21381189  | 0.905418  | -0.22109 |
| -2.169925001 | 0.577912  | -0.848   |
| 2            | 0.398521  | 2        |
| -0.591719867 | 0.919603  | -0.16152 |
| #DIV/0!      | ?         | #DIV/0!  |
| #DIV/0!      | ?         | #DIV/0!  |
| 0.479992941  | 0.882598  | 0.27563  |
| -0.925999419 | 0.956872  | 0.03284  |
| -0.00461182  | 0.981752  | 0.04596  |
| 0.736965594  | 0.926188  | -0.26303 |
| 0.263034406  | 0.756486  | -0.32193 |
| -1.415037499 | 0.455759  | -2       |
| -0.621488377 | 0.857272  | -0.27753 |

|              |           |          |
|--------------|-----------|----------|
| -0.10770508  | 0.9961    | -0.00789 |
| 0.470255293  | 0.86442   | 0.26564  |
| -1           | 0.651448  | -1       |
| -0.608809243 | 0.81144   | -0.50447 |
| -0.069508849 | 0.970831  | 0.05579  |
| 1.736965594  | 0.622002  | 1.5025   |
| 1.874469118  | 0.706667  | -1.58496 |
| -0.404578543 | 0.850263  | -0.22192 |
| -0.460552159 | 0.854082  | -0.35364 |
| -0.862496476 | 0.946535  | -0.10666 |
| -0.925742451 | 0.74185   | -0.59143 |
| -0.159656666 | 0.971486  | 0.06054  |
| 1.118210668  | 0.0185805 | 2.64043  |
| -0.332575339 | 0.893506  | 0.23447  |
| #NUM!        | 0.622002  | 1        |
| -0.547627951 | 0.686226  | -0.58031 |
| 0.186505941  | 0.969325  | -0.07545 |
| -0.603856812 | 0.968033  | -0.06024 |
| -0.706189062 | 0.909681  | 0.13479  |
| 0.722565971  | 0.808463  | 0.5936   |
| #DIV/0!      | ?         | #DIV/0!  |
| -1.2255597   | 0.792795  | -0.42138 |
| 0.056437127  | 0.732146  | -0.86871 |
| -0.447458977 | 0.716522  | -0.73697 |
| #DIV/0!      | ?         | #DIV/0!  |
| -2.078002512 | 0.70852   | -0.68314 |
| #DIV/0!      | ?         | #DIV/0!  |
| #DIV/0!      | ?         | #DIV/0!  |
| -0.020561322 | 0.930282  | 0.15778  |
| #DIV/0!      | ?         | #DIV/0!  |
| #DIV/0!      | ?         | #DIV/0!  |
| #DIV/0!      | ?         | #DIV/0!  |
| #DIV/0!      | ?         | #DIV/0!  |
| -1.132512903 | 0.812802  | 0.37643  |
| 0.337695411  | 0.695518  | 0.62149  |
| 1.171003391  | 0.30184   | 2.03488  |
| #NUM!        | 0.756486  | -0.58496 |
| -0.684498174 | 0.814094  | -0.40439 |
| -7.860820246 | 0.60218   | 0.56173  |
| -5.031523105 | 0.624335  | -0.99205 |
| 0.212050477  | 0.941264  | -0.152   |
| 0.186768512  | 0.773534  | 0.43252  |
| -0.835898579 | 0.747351  | -0.5941  |
| -0.652076697 | 0.886945  | -0.28951 |
| 37.20620283  | 1         | -92.145  |
| -0.7338402   | 0.719922  | 0.43775  |
| 37.20588751  | 1         | -47.7688 |
| -0.415037499 | 0.680109  | -1       |
| 85.91422479  | 1         | -43.4366 |
| 0.121686251  | 0.815036  | 0.4057   |
| -0.543933537 | 0.914755  | -0.07739 |
| -0.214822583 | 0.958835  | 0.08741  |
| -0.6208077   | 0.807346  | -0.39453 |
| 37.2058933   | 1         | -47.7688 |
| -5.031522366 | 0.624334  | -0.99205 |
| -0.415037499 | 0.523243  | -2       |

|              |          |          |
|--------------|----------|----------|
| -0.055657324 | 0.853467 | 0.23884  |
| 37.20588751  | 1        | -47.7688 |
| 37.20588723  | 1        | -47.7688 |
| -0.798366139 | 0.841608 | 0.29523  |
| -0.690516671 | 0.954609 | -0.09134 |
| -1.100937546 | 0.777837 | 0.16741  |
| -0.532171635 | 0.646761 | -0.4382  |
| #DIV/0!      | 0.034897 | #DIV/0!  |
| -1.457643245 | 0.953006 | 0.04262  |
| -0.042644337 | 0.954555 | 0.07505  |
| -0.584962501 | 0.637618 | 0.73697  |
| 0.453943985  | 0.813053 | 0.48235  |
| -0.609190841 | 0.657737 | 0.41525  |
| -0.263063466 | 0.982075 | 0.04058  |
| -0.209453366 | 0.977752 | -0.03953 |
| -0.078363186 | 0.980903 | -0.04282 |
| -0.403578384 | 0.886765 | -0.23975 |
| -1.598454737 | 0.985665 | -0.02842 |
| -0.412777468 | 0.971021 | -0.05614 |
| 1            | 1        | 0        |
| -0.836501268 | 0.928185 | -0.12029 |
| 0.263034406  | 0.919204 | 0.18057  |
| -0.527486011 | 0.657069 | 0.38034  |
| -0.696760529 | 0.896539 | 0.13553  |
| -1           | 0.564081 | -1.1375  |
| -0.464776631 | 0.910424 | 0.10598  |
| -0.409936532 | 0.969266 | 0.04768  |
| -2.934594105 | 0.210042 | -3.45699 |
| 0            | 0.922659 | 0.12711  |
| -0.047367848 | 0.959724 | 0.078    |
| -1.02358682  | 0.832604 | 0.33898  |
| 0.368040233  | 0.989556 | -0.02666 |
| -0.239827015 | 0.839915 | 0.21401  |
| -0.152003093 | 0.647196 | -1       |
| #NUM!        | 0.308068 | #NUM!    |
| 0.037113173  | 0.856049 | 0.28287  |
| -2.181539819 | 0.538263 | -1.38905 |
| 1.499111784  | 0.833336 | 0.71277  |
| -1.790002411 | 0.493275 | -1.02206 |
| #DIV/0!      | ?        | #DIV/0!  |
| -0.291676498 | 0.97402  | -0.05403 |
| 0.276730665  | 0.860244 | 0.31286  |
| -0.516123624 | 0.92379  | -0.12286 |
| -1.212544635 | 0.566692 | -0.14158 |
| -0.836685626 | 0.918238 | -0.15301 |
| 0.512206158  | 0.918809 | -0.20282 |
| -1.429558223 | 0.567609 | -0.92056 |
| -2.767530887 | 0.550137 | -1.15002 |
| -0.466989579 | 0.88474  | 0.05015  |
| #DIV/0!      | ?        | #DIV/0!  |
| -0.558066746 | 0.989366 | -0.02312 |
| #DIV/0!      | ?        | #DIV/0!  |
| -1.192645078 | 0.667337 | -0.83007 |
| -0.256033013 | 0.725896 | -0.43711 |
| -0.079853308 | 0.851582 | 0.2973   |
| -1.928331911 | 0.396009 | -0.62731 |

|              |          |          |
|--------------|----------|----------|
| -1.30416728  | 0.637769 | -0.99747 |
| -0.173859603 | 0.787517 | 0.29096  |
| -0.619300314 | 0.803205 | 0.3807   |
| 1.223976613  | 0.401778 | -15.9271 |
| -0.282574592 | 0.643865 | 0.63373  |
| -0.932006581 | 0.789875 | -0.48848 |
| -0.267721021 | 0.911548 | -0.2276  |
| 1.122371685  | 0.981412 | -0.06869 |
| -1.382469637 | 0.723001 | 0.4826   |
| 0.335131843  | 0.4181   | 0.91455  |
| 0            | 1        | 0        |
| -8.071785627 | 0.338286 | -3.84222 |
| -0.358484153 | 0.942538 | -0.09403 |
| 78.73289135  | 1        | -50.6177 |
| -11.87213746 | 0.487322 | -1.63287 |
| -0.099309448 | 0.94288  | 0.11782  |
| -0.361098692 | 0.991266 | 0.01639  |
| -0.170415131 | 0.940118 | -0.12696 |
| 0.218680564  | 0.65118  | 0.74167  |
| -0.415037499 | 0.523243 | -2       |
| 1            | 0.710482 | 1        |
| #DIV/0!      | ?        | #DIV/0!  |
| -0.548826432 | 0.832602 | -0.3808  |
| #DIV/0!      | 0.308068 | #DIV/0!  |
| -0.44429713  | 0.850235 | 0.21559  |
| -1.584962501 | 0.252216 | -1.58496 |
| -0.203713315 | 0.955619 | 0.09014  |
| -0.141289564 | 0.955467 | 0.08479  |
| -0.429212633 | 0.962004 | 0.06186  |
| 0.139120716  | 0.92684  | -0.21035 |
| -0.541835179 | 0.843052 | -0.35271 |
| -0.326898851 | 0.830865 | 0.29472  |
| -0.526165346 | 0.8535   | -0.2894  |
| -0.315052758 | 0.999483 | 0.0011   |
| -0.154633349 | 0.85704  | -0.36392 |
| 0.234465254  | 0.960582 | -0.08746 |
| #DIV/0!      | 0        | #DIV/0!  |
| 0.544320516  | 0.664586 | 0.70044  |
| -0.246355665 | 0.992389 | -0.01687 |
| 0.415037499  | 0.515664 | #NUM!    |
| #DIV/0!      | ?        | #DIV/0!  |
| 0            | 0.450185 | #NUM!    |
| 0.187803682  | 0.770813 | 0.64846  |
| -0.19592021  | 0.969116 | -0.04654 |
| #NUM!        | 0.622002 | 1        |
| 1.400237503  | ?        | -17.0734 |
| -0.389436596 | 0.838834 | 0.16471  |
| -1.440572591 | 0.886291 | 0.16335  |
| -0.40639356  | 0.92531  | -0.09994 |
| -0.051074185 | 0.925636 | 0.14319  |
| -0.763559804 | 0.872261 | 0.20249  |
| #DIV/0!      | ?        | #DIV/0!  |
| -0.301084191 | 0.963249 | 0.06932  |
| -1.67556505  | 0.753601 | -0.38606 |
| -0.613390909 | 0.832564 | -0.33963 |
| -1.584962501 | 0.441678 | -2.16993 |

|              |           |          |
|--------------|-----------|----------|
| -2.615238364 | 0.198053  | -4.25343 |
| -1.003253927 | 0.564828  | -1.21588 |
| -0.682903677 | 0.807116  | 0.24033  |
| -1.196371966 | 0.990185  | 0.01387  |
| -0.142604395 | 0.812164  | 0.27711  |
| -2.301354263 | 0.979606  | -0.03506 |
| -0.530514717 | 0.964617  | 0.08092  |
| #DIV/0!      | 0.308068  | #DIV/0!  |
| -2.006901962 | 0.703746  | -0.6902  |
| -0.553392422 | 0.919735  | -0.13368 |
| #DIV/0!      | ?         | #DIV/0!  |
| -0.295661273 | 0.952357  | 0.06665  |
| -0.366657037 | 1         | 0        |
| -2.42506248  | 0.769863  | -0.43973 |
| #DIV/0!      | 0.353387  | #DIV/0!  |
| -1.209869588 | 0.841725  | -0.33028 |
| -0.610692776 | 0.982095  | 0.03123  |
| 1.325104685  | 0.520699  | 1.32891  |
| -0.430828548 | 0.834879  | 0.35234  |
| #DIV/0!      | ?         | #DIV/0!  |
| #DIV/0!      | ?         | #DIV/0!  |
| -0.881621333 | 0.25748   | 0.82634  |
| #DIV/0!      | ?         | #DIV/0!  |
| -1.459431619 | 0.228778  | -3.45943 |
| -0.241239278 | 0.940898  | 0.09594  |
| -1.582643055 | 0.700482  | -0.53646 |
| -2.428843299 | 0.928489  | -0.152   |
| -0.847996907 | 0.777997  | -0.58496 |
| -0.347222115 | 0.855295  | -0.29897 |
| #DIV/0!      | ?         | #DIV/0!  |
| 0.059378547  | 0.944174  | 0.10518  |
| 0            | 0.651448  | 1        |
| -0.031495853 | 0.982357  | -0.04133 |
| -0.652723428 | 0.851255  | -0.31769 |
| -0.815575429 | 0.804124  | -0.44219 |
| #DIV/0!      | ?         | #DIV/0!  |
| -1.076427947 | 0.775118  | -0.51914 |
| -1.055205502 | 0.764731  | -0.55813 |
| -1.807354922 | 0.95442   | 0.08017  |
| -1.063565129 | 0.862189  | -0.30339 |
| -0.243784415 | 0.881557  | -0.27725 |
| -0.415037499 | 0.875097  | -0.26303 |
| -3.503661461 | 0.0317204 | -4.32916 |
| #DIV/0!      | ?         | #DIV/0!  |
| #NUM!        | 0.438509  | -0.80735 |
| -0.616278041 | 0.966574  | -0.06025 |
| -0.511500339 | 0.909809  | 0.14336  |
| 0.408084739  | 0.83514   | 0.40808  |
| -0.762960803 | 0.843079  | 0.23704  |
| -0.728796617 | 0.879136  | 0.21362  |
| #DIV/0!      | 0.308068  | #DIV/0!  |
| 0.009571635  | 0.976991  | 0.04457  |
| -0.428843299 | 0.706407  | -0.80735 |
| #DIV/0!      | ?         | #DIV/0!  |
| -0.386926246 | 0.979111  | 0.04526  |
| -1           | 0.353387  | #NUM!    |



|              |           |          |
|--------------|-----------|----------|
| -2.584962501 | 0.192316  | -1.32193 |
| #DIV/0!      | ?         | #DIV/0!  |
| #DIV/0!      | 0.450185  | #DIV/0!  |
| -0.180531267 | 0.935383  | -0.13573 |
| -13.9696977  | 0.308068  | -40.4047 |
| -1.563833626 | 0.825726  | -0.31506 |
| -0.763516844 | 0.308664  | -19.0278 |
| #DIV/0!      | 1         | #DIV/0!  |
| -6.511015252 | 0.0924451 | 2.9581   |
| #DIV/0!      | 1         | #DIV/0!  |
| 1.584962501  | 0.559404  | 1.58496  |
| -1.03562391  | 0.975602  | -0.03562 |
| -0.869939459 | 0.760347  | -0.6194  |
| #NUM!        | 0.308068  | #NUM!    |
| -1.108059746 | 0.935782  | -0.08159 |
| -1.345112775 | 0.425213  | -0.28168 |
| -0.171415718 | 0.936655  | 0.09908  |
| #NUM!        | 0.502754  | 0.87447  |
| -0.029880562 | 0.723827  | 0.39836  |
| 0.584962501  | 0.764931  | -1       |
| #NUM!        | 0.308068  | #NUM!    |
| -0.579727272 | 0.85038   | -0.3341  |
| #DIV/0!      | ?         | #DIV/0!  |
| #DIV/0!      | ?         | #DIV/0!  |
| -1.378511623 | 0.936125  | 0.10692  |
| -0.545725693 | 0.920103  | 0.12148  |
| -0.084273984 | 0.685884  | 0.50203  |
| -0.424433598 | 0.89322   | 0.20242  |
| -0.775827536 | 0.980078  | 0.03242  |
| -0.9513271   | 0.899514  | -0.21425 |
| -0.741186689 | 0.923425  | -0.1315  |
| -0.485426827 | 0.774936  | 0.51457  |
| #NUM!        | 0.308068  | -61.4028 |
| 1.656623486  | 0.946913  | -0.26303 |
| -2.419775418 | 0.787635  | 0.43033  |
| -1.021061616 | 0.622002  | -0.26722 |
| -0.409985715 | 0.192704  | 0.43475  |
| -0.184992315 | 0.759112  | -0.48489 |
| -0.394415889 | 0.967259  | 0.07472  |
| 2.459431619  | 0.393741  | 1.80735  |
| -0.709738429 | 0.966311  | -0.06337 |
| #NUM!        | 0.034897  | 2        |
| #DIV/0!      | ?         | #DIV/0!  |
| -0.963073286 | 0.405016  | 0.49904  |
| -0.407503827 | 0.879763  | -0.28741 |
| -0.332983283 | 0.957906  | 0.08552  |
| 0            | 0.909362  | -0.22239 |
| -0.1673889   | 0.758591  | 0.39656  |
| -0.49809686  | 0.917659  | 0.12471  |
| -0.59946207  | 0.722801  | -0.55639 |
| -0.073463843 | 0.946861  | 0.0921   |
| -0.605140383 | 0.800688  | -0.43296 |
| -0.680822516 | 0.710208  | -0.76005 |
| -0.46994584  | 0.822066  | -0.41304 |
| -0.995832965 | 0.924849  | 0.0994   |
| -0.434095835 | 0.734693  | -0.61365 |

|              |          |          |
|--------------|----------|----------|
| 0.091630475  | 0.750197 | 0.4443   |
| -0.741627994 | 0.781242 | -0.20388 |
| 0.678071905  | 0.79404  | 0.58496  |
| -0.423101774 | 0.751414 | -0.60195 |
| -1.773556804 | 0.257587 | -1.80852 |
| 0.584962501  | 0.764931 | -1       |
| 0.166649869  | 0.938779 | 0.14018  |
| -0.365353588 | 0.92495  | 0.13212  |
| -1.868282477 | 0.397853 | -1.09643 |
| 0.386988301  | 0.714615 | 0.7438   |
| 0.480198387  | 0.814176 | 0.50899  |
| 0.710493383  | 0.697945 | 0.50404  |
| -0.415037499 | 0.847091 | -0.41504 |
| -0.436904985 | 0.881772 | -0.24853 |
| -0.462971976 | 0.965917 | -0.08746 |
| 0.042560462  | 0.825825 | -0.41792 |
| -70.77740541 | 0.308068 | -58.0979 |
| -0.657925837 | 0.657009 | -0.75185 |
| 1.1627295    | 0.840173 | 0.50377  |
| #DIV/0!      | ?        | #DIV/0!  |
| #NUM!        | 0.495025 | 1.58496  |
| -0.877515993 | 0.65199  | -0.87752 |
| -0.569892026 | 0.951795 | -0.0914  |
| -21.77150095 | 0.308371 | -10.3707 |
| -0.523561956 | 0.594683 | -0.82312 |
| 0.29539515   | 0.843731 | 0.45072  |
| #DIV/0!      | ?        | #DIV/0!  |
| 0.230009847  | 0.450665 | 1.13153  |
| -0.020902302 | 0.94067  | -0.13752 |
| -0.105507162 | 0.827096 | 0.32315  |
| #DIV/0!      | ?        | #DIV/0!  |
| -0.91753784  | 0.549051 | -1.28011 |
| -0.362570079 | 0.8566   | -0.36257 |
| -0.008267616 | 0.908575 | -0.22239 |
| 0.51887331   | 0.925027 | 0.2007   |
| -0.331355143 | 0.831806 | 0.23056  |
| #NUM!        | 0.308068 | 52.8712  |
| -0.693896872 | 0.52901  | -1.02647 |
| -0.58323782  | 0.867991 | -0.25203 |
| 0.36545547   | 0.786428 | 0.51847  |
| 1.216811389  | 0.990231 | -0.03953 |
| -0.749662423 | 0.885227 | -0.12876 |
| -0.385192988 | 0.963789 | -0.08583 |
| #DIV/0!      | ?        | #DIV/0!  |
| 0.523561956  | 0.737903 | 0.70044  |
| -0.14310338  | 0.971602 | -0.06485 |
| -0.913091935 | 0.99771  | -0.00472 |
| -1.19844331  | 0.642007 | 0.71757  |
| -0.35330851  | 0.968875 | 0.06926  |
| -19.08021629 | 0.30807  | -17.6241 |
| -0.174495315 | 0.715995 | 0.57007  |
| -1.345774837 | 0.683907 | -0.76081 |
| -5.033339637 | 0.822896 | -0.28657 |
| -1.227526406 | 0.895047 | -0.12184 |
| 0.017702002  | 0.867817 | -0.30643 |
| -1.374467434 | 0.92654  | -0.08676 |

|              |          |          |
|--------------|----------|----------|
| 1.095784572  | 0.564564 | 0.63604  |
| -0.365062858 | 0.865581 | 0.1871   |
| 0.385511957  | 0.813469 | 0.37643  |
| #NUM!        | 1        | 0        |
| 1.73976281   | 0.672135 | 1.42069  |
| #DIV/0!      | ?        | #DIV/0!  |
| -1.111031312 | 0.700736 | -0.32862 |
| -0.525091045 | 0.844814 | -0.26793 |
| -3.2410081   | 0.143066 | -1.98162 |
| -0.647487278 | 0.188432 | -1.43795 |
| #NUM!        | 0.308068 | 1        |
| -2.807354922 | 0.568955 | -1.22239 |
| -1.584962501 | 0.806201 | -0.37851 |
| -0.438699302 | 0.727635 | 0.67278  |
| 0            | 0.236154 | -2.32193 |
| -0.362570079 | 0.667337 | 0.83007  |
| 1            | 0.409442 | 2.58496  |
| 0.131440997  | 0.991348 | -0.01905 |
| -0.520899576 | 0.970634 | -0.05692 |
| -0.673509723 | 0.664312 | -0.88433 |
| -0.94753258  | 0.877103 | -0.16993 |
| #DIV/0!      | ?        | #DIV/0!  |
| -0.450180793 | 0.115004 | 1.70146  |
| -0.020694586 | 0.39011  | 0.53723  |
| -1.746243408 | 0.747188 | -0.55069 |
| -0.409713655 | 0.714293 | -0.50441 |
| -0.415037499 | 0.920998 | -0.18503 |
| 0.799693475  | 0.338254 | 1.10108  |
| 0.298572698  | 0.712209 | 0.49816  |
| -0.770545689 | 0.588224 | -1.33798 |
| -0.415037499 | 0.680109 | -1       |
| -0.111031312 | 0.85675  | 0.34665  |
| -0.700439718 | 1        | 0        |
| 0.846525988  | 0.617333 | -1.06838 |
| #DIV/0!      | ?        | #DIV/0!  |
| -0.653458813 | 0.725114 | -0.47008 |
| -1.23691023  | 0.972061 | -0.0375  |
| -0.493262667 | 0.944749 | -0.10276 |
| 0            | 1        | 0        |
| #DIV/0!      | ?        | #DIV/0!  |
| -0.285482594 | 0.853968 | 0.25672  |
| -0.504751621 | 0.810299 | -0.39419 |
| -0.508360324 | 0.914533 | 0.14534  |
| -0.347923303 | 0.866773 | -0.22239 |
| 0.089522096  | 0.863982 | 0.25612  |
| -2.963474124 | 0.471141 | -1.5229  |
| -0.841060859 | 0.857838 | 0.24945  |
| #NUM!        | 0.308068 | #NUM!    |
| -0.097211803 | 0.940079 | 0.11544  |
| -0.541926437 | 0.977046 | 0.0384   |
| -0.394859617 | 0.937714 | 0.13566  |
| #DIV/0!      | ?        | #DIV/0!  |
| -1.054447784 | 0.676547 | -0.848   |
| -0.306377048 | 0.848137 | 0.30654  |
| -0.328622747 | 0.632646 | 0.72085  |
| 0.226215198  | 0.940979 | 0.14267  |

|              |          |          |
|--------------|----------|----------|
| 0.026967048  | 0.353182 | 0.81124  |
| -0.009676628 | 0.9511   | -0.13793 |
| 3.520676382  | 0.468821 | 3.63876  |
| -0.211577827 | 0.971086 | -0.06958 |
| -0.449643224 | 0.983412 | 0.03131  |
| -0.256339753 | 0.947582 | 0.0973   |
| #DIV/0!      | ?        | #DIV/0!  |
| #NUM!        | 0.910298 | 0.16658  |
| -0.019628807 | 0.903418 | -0.24752 |
| #NUM!        | 0.438509 | 2        |
| 0.489960301  | 0.900957 | 0.25161  |
| -0.508066467 | 0.955416 | -0.0668  |
| -1.212993723 | 0.904775 | -0.18057 |
| -0.124926612 | 0.900006 | 0.1588   |
| -0.023621731 | 0.883237 | 0.1916   |
| #DIV/0!      | 0.308068 | #DIV/0!  |
| -3.835907743 | 0.101898 | -1.2266  |
| -0.285908872 | 0.990382 | 0.01612  |
| #DIV/0!      | ?        | #DIV/0!  |
| 0.438121112  | 0.95505  | 0.0902   |
| -0.15833301  | 0.7386   | 0.41597  |
| -0.562419932 | 0.85348  | -0.35933 |
| 0.298081353  | 0.885048 | -0.34577 |
| 0            | 0.813955 | -0.54749 |
| -0.362570079 | 0.749249 | -0.58496 |
| -0.384854506 | 0.734494 | 0.38275  |
| #NUM!        | 0.756486 | -0.58496 |
| #NUM!        | 0.756486 | 0.41504  |
| -0.697971463 | 0.858563 | -0.30718 |
| -0.367419479 | 0.998721 | -0.00242 |
| -0.492897276 | 0.997835 | -0.00386 |
| -0.620774878 | 0.82681  | 0.25256  |
| -0.469485283 | 0.908072 | 0.152    |
| -1           | 0.353387 | #NUM!    |
| #DIV/0!      | ?        | #DIV/0!  |
| #DIV/0!      | 0.308068 | #DIV/0!  |
| -1.148863386 | 0.55203  | -1.28011 |
| #DIV/0!      | ?        | #DIV/0!  |
| 0.241602206  | 0.882117 | 0.28741  |
| -0.136004125 | 0.868382 | 0.25007  |
| 0.817135943  | 0.613399 | 0.73697  |
| 1.906890596  | 0.279199 | 2.08746  |
| 63.77997781  | 0.333147 | 65.2394  |
| -0.440572591 | 0.899793 | 0.14439  |
| -2.321928095 | 0.31594  | #NUM!    |
| -2.321928095 | 0.691772 | -0.73697 |
| -0.74999903  | 0.837729 | 0.24053  |
| -0.584962501 | 0.914028 | 0.152    |
| -0.766671201 | 0.505252 | -1.69644 |
| -0.715287945 | 0.905497 | -0.19533 |
| -0.216587863 | 0.75042  | -0.44086 |
| -0.090197809 | 0.853001 | 0.31316  |
| -0.416504398 | 0.94619  | -0.112   |
| -1.045323991 | 0.881253 | 0.18145  |
| #DIV/0!      | 1        | #DIV/0!  |
| #DIV/0!      | ?        | #DIV/0!  |

|              |           |          |
|--------------|-----------|----------|
| -0.104426606 | 0.940916  | 0.13554  |
| -1.07531736  | 0.422499  | -1.15853 |
| -0.603520048 | 0.987066  | -0.0244  |
| -0.533496333 | 0.97896   | 0.02895  |
| -0.48133987  | 0.846118  | -0.38466 |
| 0            | 0.93415   | 0.12029  |
| 0.475840778  | 0.624986  | 0.62578  |
| -0.218423519 | 0.992524  | -0.01498 |
| -0.223909291 | 0.97839   | 0.04125  |
| -0.343910813 | 0.900432  | -0.21598 |
| #DIV/0!      | ?         | #DIV/0!  |
| 0.107951913  | 0.395099  | 0.91374  |
| -0.21920926  | 0.977584  | 0.03774  |
| #DIV/0!      | ?         | #DIV/0!  |
| #DIV/0!      | ?         | #DIV/0!  |
| -0.819750469 | 0.989492  | -0.02211 |
| #NUM!        | 0.622002  | 1        |
| -0.364300137 | 0.965414  | 0.0697   |
| -1.169625759 | 0.467698  | -1.43522 |
| -0.825247629 | 0.904688  | 0.14471  |
| #NUM!        | 0.622002  | -1       |
| -0.096771889 | 0.959361  | 0.05696  |
| -1.56583145  | 0.537369  | -1.44815 |
| -0.069540933 | 0.864499  | 0.22578  |
| -0.374009945 | 0.888156  | -0.26086 |
| #DIV/0!      | ?         | #DIV/0!  |
| #DIV/0!      | ?         | #DIV/0!  |
| #NUM!        | 0.308068  | 1        |
| #NUM!        | 0.308068  | #NUM!    |
| #NUM!        | 0.622002  | 1        |
| -1.544320516 | 0.628938  | -0.73697 |
| -0.69726547  | 0.892246  | 0.17627  |
| 0.768415486  | 0.579305  | -11.0281 |
| 0.502500341  | 0.544514  | 1.05889  |
| 1            | 0.806588  | -0.41504 |
| 0            | 0.0877066 | 2.58496  |
| 0.192031669  | 0.385879  | -7.90904 |
| -0.237039197 | 0.682702  | -0.79647 |
| 1.478328359  | 0.657295  | 0.88302  |
| -0.292719287 | 0.927076  | 0.11629  |
| -0.343743595 | 0.994128  | 0.00983  |
| -0.126700883 | 0.971934  | 0.06469  |
| 0.096215315  | 0.833431  | -0.46566 |
| -0.143590854 | 0.86072   | 0.30666  |
| 0.184417265  | 0.780411  | 0.47573  |
| -0.158959822 | 0.784767  | 0.33372  |
| -0.502500341 | 0.683094  | -0.5025  |
| -0.58322536  | 0.981703  | -0.02543 |
| -1.30256277  | 0.672795  | -0.88753 |
| -0.244307198 | 0.850299  | 0.24296  |
| -0.629700815 | 0.920662  | -0.15078 |
| -0.06871275  | 0.888429  | 0.21759  |
| -0.65516901  | 0.957383  | -0.07734 |
| -4.132971262 | 0.259792  | -10.2449 |
| -0.386058432 | 0.870251  | 0.29406  |
| -0.051699568 | 0.824066  | -0.48884 |

|              |          |          |
|--------------|----------|----------|
| -1.970595563 | 0.987438 | 0.02371  |
| -0.115334812 | 0.381558 | 0.52302  |
| -0.402360376 | 0.69791  | 0.33632  |
| -1.906890596 | 0.515664 | -0.32193 |
| -0.609956016 | 0.816871 | -0.25783 |
| -0.756391154 | 0.827147 | -0.38985 |
| 0.415037499  | 0.698562 | -1       |
| -0.362844676 | 0.981779 | 0.03289  |
| -0.398549376 | 0.875349 | -0.33442 |
| 0.096404484  | 0.980662 | 0.04617  |
| -0.574612762 | 0.778896 | -0.4023  |
| 1.678071905  | 0.284468 | 1.848    |
| -0.600474123 | 0.896889 | 0.1738   |
| -0.144442445 | 0.873599 | 0.26685  |
| -0.391247061 | 0.910476 | 0.14231  |
| #NUM!        | 0.622002 | -1       |
| -0.319738164 | 0.99389  | 0.01247  |
| #DIV/0!      | ?        | #DIV/0!  |
| #DIV/0!      | 0.622002 | #DIV/0!  |
| 0.070275014  | 0.934978 | 0.15464  |
| -1.034765418 | 0.682953 | -0.26303 |
| -0.598611125 | 0.863064 | 0.14177  |
| -0.319617934 | 0.833171 | 0.26149  |
| 0.091775802  | 0.794677 | -0.64106 |
| -1.321928095 | 0.879571 | 0.1635   |
| 3.137392637  | 0.745339 | 1.66801  |
| -0.443476685 | 0.9187   | 0.10494  |
| -0.74723393  | 0.44093  | 1.08927  |
| -0.928886241 | 0.985548 | 0.02581  |
| -1.112367412 | 0.687434 | -0.78327 |
| #DIV/0!      | 0.724378 | #DIV/0!  |
| -0.406357338 | 0.941201 | -0.14475 |
| #DIV/0!      | ?        | #DIV/0!  |
| 19.04097009  | 0.158191 | 20.8652  |
| #DIV/0!      | ?        | #DIV/0!  |
| -0.093109404 | 0.927898 | -0.19265 |
| -0.507049639 | 0.9312   | 0.11613  |
| -0.717613862 | 0.996049 | 0.00688  |
| 0.415037499  | 0.462495 | 1.22239  |
| 0.125530882  | 0.903569 | 0.24101  |
| -0.244803669 | 1        | 0        |
| 0.644320562  | 0.45387  | 0.79014  |
| #NUM!        | 0.622002 | -1       |
| -2.904980223 | 0.311591 | -25.342  |
| #NUM!        | 0.308068 | #NUM!    |
| #NUM!        | 0.622002 | -1       |
| #NUM!        | 0.622002 | -1       |
| #NUM!        | 0.308068 | #NUM!    |
| #NUM!        | 0.308068 | #NUM!    |
| #NUM!        | 0.622002 | -1       |
| #NUM!        | 0.622002 | -1       |
| #NUM!        | 0.622002 | -1       |
| #NUM!        | 0.622002 | -1       |
| #NUM!        | 0.622002 | -1       |
| -1.074000581 | 0.970083 | -0.03653 |
| 0.353636955  | 0.96714  | 0.078    |

|              |          |          |
|--------------|----------|----------|
| 0            | 1        | 0        |
| #DIV/0!      | ?        | #DIV/0!  |
| -0.0719146   | 0.712201 | 0.50714  |
| -0.506959989 | 0.529173 | 0.83007  |
| -0.476438044 | 1        | 0        |
| #DIV/0!      | ?        | #DIV/0!  |
| 0.125530882  | 0.955518 | 0.12553  |
| #NUM!        | 0.702697 | 0.73697  |
| -0.254826366 | 0.771216 | -0.6481  |
| -0.058096243 | 0.667555 | 0.43385  |
| #DIV/0!      | 0.308068 | #DIV/0!  |
| 0.055172834  | 0.587747 | -1.86463 |
| -0.421463768 | 0.870989 | -0.26303 |
| 0            | 0.450185 | #NUM!    |
| -1.087462841 | 0.467976 | -2.08746 |
| 0.796466606  | 0.754367 | 0.5697   |
| #DIV/0!      | ?        | #DIV/0!  |
| 0.485326921  | 0.908448 | 0.26035  |
| #DIV/0!      | 0.308068 | #DIV/0!  |
| -0.223205594 | 0.969309 | 0.06233  |
| -0.858694906 | 0.902157 | 0.20544  |
| -0.066871068 | 0.877482 | 0.23901  |
| -0.068133168 | 0.97315  | 0.06279  |
| -1           | 0.764931 | 0.58496  |
| -0.164275279 | 0.993219 | 0.01288  |
| -0.95419631  | 0.809824 | -0.36923 |
| -0.423211431 | 1        | 0        |
| 0.137503524  | 0.98247  | 0.03562  |
| -0.40596505  | 0.962862 | -0.06683 |
| #DIV/0!      | ?        | #DIV/0!  |
| -0.573259831 | 0.735672 | -0.64516 |
| -0.792195115 | 0.887794 | -0.14975 |
| -0.108797389 | 0.976046 | 0.05819  |
| -0.119213158 | 0.963041 | 0.09155  |
| -0.45445218  | 0.801231 | -0.39674 |
| #DIV/0!      | 0.308068 | #DIV/0!  |
| -1.94753258  | 0.680234 | -0.75489 |
| -2.950221091 | 0.618716 | 0.95519  |
| -0.443038613 | 0.848795 | -0.34185 |
| -0.904714712 | 0.869002 | -0.21271 |
| -0.334779923 | 0.999353 | -0.00138 |
| #DIV/0!      | 1        | #DIV/0!  |
| -58.19749785 | 0.126084 | -1.67807 |
| #DIV/0!      | 1        | #DIV/0!  |
| 80.55245132  | 1        | -27.3315 |
| 53.54883163  | 1        | 17.5756  |
| -0.293857329 | 0.938804 | 0.13073  |
| #DIV/0!      | ?        | #DIV/0!  |
| #DIV/0!      | ?        | #DIV/0!  |
| #DIV/0!      | 0.308068 | #DIV/0!  |
| #DIV/0!      | 0.308068 | #DIV/0!  |
| -1.299560282 | 0.67199  | 0.70044  |
| -1.412335887 | ?        | -12.0734 |
| -0.306190937 | 0.897478 | 0.19298  |
| -0.466800816 | 0.89832  | -0.20292 |
| -3.169925579 | 0.513713 | -0.36257 |

|              |          |          |
|--------------|----------|----------|
| 0.210514491  | 0.61083  | 0.63322  |
| -1           | 0.513713 | 0.58496  |
| #DIV/0!      | ?        | #DIV/0!  |
| -1.555920365 | 0.712854 | -0.53838 |
| -0.246706236 | 0.967558 | 0.06124  |
| -0.670876404 | 0.824091 | -0.37941 |
| -0.003871816 | 0.988188 | -0.02705 |
| -0.251092734 | 0.997237 | 0.00561  |
| -1.807354922 | 0.391002 | -2.80735 |
| 0.010053665  | 0.929868 | 0.14938  |
| 2.237039197  | 0.587254 | 1.5502   |
| -1.263034406 | 0.940721 | 0.11548  |
| -0.184083064 | 0.969345 | 0.05889  |
| -0.731183242 | 0.890158 | -0.17612 |
| -0.466278334 | 0.913898 | -0.17849 |
| -1.427421224 | 0.678667 | 0.63346  |
| -0.065376009 | 0.886303 | 0.25081  |
| 0.627204919  | 0.627033 | 0.67712  |
| -1.777607579 | 0.688635 | -0.77761 |
| -0.436863862 | 0.990329 | 0.0158   |
| -1.321928095 | 0.717686 | -0.73697 |
| -0.499170983 | 0.831049 | 0.32767  |
| -0.071894049 | 0.90229  | 0.20356  |
| -0.974909019 | 0.896328 | 0.2332   |
| -1.683281818 | 0.410589 | -0.41713 |
| 0.77824499   | 0.297523 | 1.82213  |
| -2.807354922 | 1        | 0        |
| -0.321928095 | 0.844246 | -0.39119 |
| -0.562134959 | 0.980311 | 0.03067  |
| -0.089699583 | 0.814464 | -0.30459 |
| -1.321928095 | 0.834708 | -0.152   |
| -1.048311184 | 0.810289 | -0.12249 |
| -1.161501789 | 0.509183 | -0.57526 |
| -1.222392421 | 0.639236 | -0.80735 |
| -0.740432771 | 0.790628 | 0.33446  |
| 21.1820342   | 0.312595 | 23.9081  |
| -0.086479521 | 0.848733 | 0.31878  |
| -0.137322837 | 0.997256 | 0.00463  |
| 0.132119059  | 0.920095 | 0.15344  |
| -15.21710746 | 0.309132 | -8.5588  |
| 0            | 0.946355 | -0.152   |
| -0.956931278 | 0.578184 | -0.48981 |
| -0.354664881 | 0.989539 | -0.01862 |
| -0.23789198  | 0.907697 | 0.16744  |
| 1            | 1        | 0        |
| -0.626652522 | 0.931123 | 0.10875  |
| -0.550146742 | 0.980149 | 0.0293   |
| 0.34256537   | 0.892872 | 0.24163  |
| 0            | 0.622002 | 0.58496  |
| 0.754124181  | 0.578495 | 1.01734  |
| -1.584962501 | 0.329316 | #NUM!    |
| -0.415037499 | 0.680109 | -1       |
| -1.450358035 | 0.835751 | -0.28597 |
| -1.034114427 | 0.86111  | -0.20754 |
| -0.736965594 | 0.631511 | -0.55639 |
| -0.244503123 | 0.948231 | 0.09139  |



|              |          |          |
|--------------|----------|----------|
| 0            | 0.513713 | 1.58496  |
| -0.425787885 | 0.89932  | -0.14524 |
| -0.815575429 | 0.768046 | -0.41504 |
| -0.305681101 | 0.839876 | 0.18955  |
| -1.236529419 | 0.824359 | -0.15323 |
| 0.308605593  | 0.782195 | -0.5797  |
| #DIV/0!      | ?        | #DIV/0!  |
| -0.548209153 | 0.936103 | -0.13761 |
| -0.137503524 | 0.735025 | -0.65208 |
| #DIV/0!      | 0.308068 | #DIV/0!  |
| 0            | 1        | 0        |
| -0.15373473  | 0.980253 | 0.03861  |
| 0            | 0.450185 | #NUM!    |
| 0.398549376  | 0.906379 | -0.28951 |
| 0.156969346  | 0.900585 | -0.12102 |
| -0.02749791  | 0.939503 | -0.13716 |
| -2.247927513 | 0.621662 | 0.79647  |
| -0.880329769 | 0.912783 | -0.17236 |
| -0.363102364 | 0.75666  | 0.35647  |
| -1.083187012 | 0.726661 | -0.40321 |
| -0.382793159 | 0.797387 | 0.22125  |
| -0.924328944 | 0.669133 | -0.3153  |
| -0.559529333 | 0.962849 | -0.07655 |
| 0.12684928   | 0.952746 | 0.12966  |
| -0.125987937 | 0.881022 | 0.18971  |
| 0.45458903   | 0.896951 | 0.22273  |
| -0.184093079 | 0.823341 | 0.25581  |
| -0.992222728 | 0.958002 | 0.07349  |
| 2.321928095  | 1        | 0        |
| -0.407484105 | 0.950313 | 0.09878  |
| -2.227155835 | 0.968065 | 0.06689  |
| 4.880657104  | 0.969538 | 1        |
| -0.253517094 | 0.988685 | 0.02061  |
| -0.55583969  | 0.834274 | 0.25267  |
| 0.263034406  | 0.866773 | 0.26303  |
| -0.485426827 | 0.635961 | 0.73697  |
| -1           | 0.907467 | 0.22239  |
| 5.36934467   | 0.987522 | -1.16816 |
| -2.530514717 | 0.506081 | -1.36059 |
| 0.56326743   | 0.854816 | 0.37685  |
| -8.017546158 | 0.30807  | -18.0721 |
| -0.228268988 | 0.966382 | -0.05377 |
| 3.825646365  | 0.340335 | 2.90914  |
| 1            | 0.559404 | 1.58496  |
| -0.444752395 | 0.963986 | 0.07818  |
| 0.280107919  | 0.944201 | -0.1635  |
| -0.287759181 | 0.949689 | -0.08832 |
| -0.987509056 | 0.846699 | -0.3377  |
| -46.10153203 | 0.119771 | 33.6049  |
| -0.453283478 | 0.959589 | 0.08331  |
| -0.760609141 | 0.867258 | -0.1997  |
| -0.324028598 | 0.782339 | 0.22642  |
| 0.830348688  | 0.657479 | 0.86241  |
| -0.660665341 | 0.803699 | 0.39358  |
| #DIV/0!      | ?        | #DIV/0!  |
| 1            | 1        | 0        |

|              |            |          |
|--------------|------------|----------|
| #DIV/0!      | ?          | #DIV/0!  |
| #DIV/0!      | ?          | #DIV/0!  |
| #NUM!        | 0.0540204  | #NUM!    |
| #DIV/0!      | 0.308068   | #DIV/0!  |
| #DIV/0!      | ?          | #DIV/0!  |
| #NUM!        | ?          | 18.2235  |
| #NUM!        | 0.00344578 | -53.9909 |
| #NUM!        | 0.00344578 | -53.9909 |
| #NUM!        | 0.308068   | -52.7658 |
| #DIV/0!      | ?          | #DIV/0!  |
| #DIV/0!      | ?          | #DIV/0!  |
| #DIV/0!      | ?          | #DIV/0!  |
| #DIV/0!      | ?          | #DIV/0!  |
| #DIV/0!      | 0.308068   | #DIV/0!  |
| 27.00998323  | 0.406384   | 27.3595  |
| -1.905974674 | 0.177757   | 1.41448  |
| #DIV/0!      | 1          | #DIV/0!  |
| #DIV/0!      | 1          | #DIV/0!  |
| #DIV/0!      | ?          | #DIV/0!  |
| #DIV/0!      | ?          | #DIV/0!  |
| -4.576680863 | 0.600428   | -0.53337 |
| -0.548144397 | 0.692611   | 0.29049  |
| -0.689110898 | 0.890228   | -0.14366 |
| -1.133446569 | 0.896726   | 0.16886  |
| -0.50578454  | 0.878319   | 0.20957  |
| -2           | 0.450185   | -2       |
| #DIV/0!      | ?          | #DIV/0!  |
| 0.152003093  | 0.812953   | 0.28951  |
| #DIV/0!      | ?          | #DIV/0!  |
| #DIV/0!      | ?          | #DIV/0!  |
| #DIV/0!      | ?          | #DIV/0!  |
| #DIV/0!      | ?          | #DIV/0!  |
| #DIV/0!      | ?          | #DIV/0!  |
| -0.648349142 | 0.946371   | 0.03588  |
| #DIV/0!      | ?          | #DIV/0!  |
| #DIV/0!      | ?          | #DIV/0!  |
| #DIV/0!      | ?          | #DIV/0!  |
| #NUM!        | 0.308068   | 69.3398  |
| -1           | 1          | 0        |
| #NUM!        | 0.308051   | 69.3398  |
| 0            | 0.651448   | 1        |
| #NUM!        | 0.308068   | 69.3398  |
| -0.314895524 | 0.980318   | -0.04528 |
| -47.18343342 | 0.31374    | -6.16395 |
| #DIV/0!      | 0.308068   | #DIV/0!  |
| -45.52436412 | 0.0153797  | 61.1688  |
| 3.764409191  | 0.476956   | 3.79088  |
| #DIV/0!      | 0.259922   | #DIV/0!  |
| #DIV/0!      | 0.308068   | #DIV/0!  |
| #DIV/0!      | 0.307755   | #DIV/0!  |
| #DIV/0!      | 0.308068   | #DIV/0!  |
| -47.18343342 | 0.308177   | -11.8426 |
| -47.18343342 | 0.31374    | -6.16395 |
| #DIV/0!      | 0.308068   | #DIV/0!  |
| 53.34932627  | ?          | 44.5709  |
| 53.34932627  | ?          | 44.5709  |

|              |          |          |
|--------------|----------|----------|
| #DIV/0!      | ?        | #DIV/0!  |
| 46.40282821  | 0.308068 | 84.0401  |
| #NUM!        | 0.198892 | -2       |
| #DIV/0!      | 0.308068 | #DIV/0!  |
| 47.43067181  | 0.307755 | 74.3454  |
| #NUM!        | ?        | -36.0304 |
| #DIV/0!      | 0.308068 | #DIV/0!  |
| 53.34932627  | ?        | 65.2602  |
| 1            | 0.481309 | 1.32193  |
| #DIV/0!      | 0.308068 | #DIV/0!  |
| #DIV/0!      | 0.308068 | #DIV/0!  |
| #DIV/0!      | 0.308068 | #DIV/0!  |
| #NUM!        | 0.308068 | -72.6521 |
| #NUM!        | ?        | -58.6549 |
| -0.010018756 | 0.871027 | 0.26179  |
| -50.90965229 | 0.308068 | -72.6521 |
| #DIV/0!      | ?        | #DIV/0!  |
| -1.807354922 | 0.323864 | -1       |
| #DIV/0!      | ?        | #DIV/0!  |
| #NUM!        | 0.308068 | 80.8685  |
| #NUM!        | ?        | #NUM!    |
| #NUM!        | 0.308068 | #NUM!    |
| #DIV/0!      | 0.308068 | #DIV/0!  |
| #NUM!        | 0.308068 | #NUM!    |
| #DIV/0!      | 0.308068 | #DIV/0!  |
| #NUM!        | 0.308068 | -31.1286 |
| -80.9272931  | 0.308068 | -102.67  |
| #NUM!        | 0.308068 | #NUM!    |
| -8.286607773 | 0.768333 | 0.55327  |
| 1.018805066  | 0.437718 | 2.32193  |
| #NUM!        | 0.308068 | #NUM!    |
| -32.49069342 | 0.729312 | -0.56057 |
| #DIV/0!      | 0.231073 | #DIV/0!  |
| 0.050150878  | 0.59142  | 1.23023  |
| #NUM!        | 0.308068 | #NUM!    |
| -0.28275962  | 0.970273 | -0.06417 |
| -0.225488335 | 0.82007  | -0.49287 |
| -0.652617543 | 0.932942 | 0.0885   |
| 0.045332284  | 0.846458 | 0.3204   |
| -0.665072676 | 0.888263 | -0.1485  |
| #DIV/0!      | ?        | #DIV/0!  |
| -0.807354922 | 0.622002 | -1.07039 |
| -34.45881174 | 0.228315 | 2.33936  |
| -0.36031944  | 0.870923 | 0.24847  |
| -0.403977596 | 0.903376 | 0.1567   |
| -0.433653177 | 0.891829 | 0.17239  |
| -0.183174041 | 0.955339 | 0.05788  |
| -23.87215862 | 0.308068 | -35.1293 |
| -1.090032201 | 0.949122 | -0.10652 |
| -0.893599293 | 0.771885 | -0.39686 |
| 0            | 0.234161 | 1.80735  |
| -0.866723996 | 0.312946 | 6.38073  |
| -1.070389328 | 0.667924 | -0.80735 |
| -1.049043447 | 0.754559 | -0.58394 |
| -0.956626591 | 0.92803  | -0.11872 |
| -0.503574174 | 0.90679  | 0.1002   |

|              |          |          |
|--------------|----------|----------|
| 0.700439718  | 0.450185 | 1.08746  |
| 0.192645078  | 0.682704 | 0.8365   |
| #DIV/0!      | 1        | #DIV/0!  |
| 0.375001966  | 0.435159 | 0.77064  |
| 0.332575339  | 0.857889 | 0.3744   |
| 1.391154704  | 0.749221 | 0.68958  |
| -0.807354922 | 0.852433 | -0.34792 |
| -0.832587467 | 0.86722  | 0.25926  |
| #DIV/0!      | ?        | #DIV/0!  |
| -0.646489007 | 0.776574 | 0.32984  |
| -4.400271498 | 0.088017 | -2.09544 |
| -0.431339312 | 0.956973 | -0.08342 |
| -0.481731406 | 0.582964 | 0.81097  |
| -0.941725936 | 0.356817 | -66.6508 |
| -2.222392421 | 0.365356 | -2.80735 |
| -15.91029121 | 0.308068 | 20.0968  |
| 106.846336   | 0.64465  | 105.719  |
| 34.42705263  | 0.894478 | 31.3509  |
| 12.6984293   | 0.308068 | 41.8206  |
| -24.66469356 | ?        | -30.2388 |
| -2.321928095 | 0.550362 | -1.32193 |
| #NUM!        | 0.56584  | 1.22239  |
| -0.317087484 | 0.520666 | -0.73055 |
| #DIV/0!      | ?        | #DIV/0!  |
| -0.415037499 | 0.900374 | -0.19265 |
| -4.949945229 | 0.215905 | 1.49042  |
| -0.117827724 | 0.90346  | 0.19794  |
| -0.814228465 | 0.923684 | 0.14316  |
| -0.543814249 | 0.660962 | -0.76012 |
| -0.193090813 | 0.980516 | 0.03351  |
| 0.031586343  | 0.735203 | 0.37214  |
| -1.177193002 | 0.971364 | -0.0592  |
| -0.960107273 | 0.892014 | 0.18927  |
| -1.542527234 | 0.492254 | 0.87643  |
| -2           | 0.630057 | -1       |
| -0.917373461 | 0.852681 | 0.13605  |
| -0.160460843 | 0.905529 | 0.18371  |
| -1.735350178 | 0.548264 | -1.19613 |
| -0.147635952 | 0.918812 | -0.20202 |
| -0.44801755  | 0.670107 | 0.50257  |
| -1.187483227 | 0.967195 | -0.06548 |
| -4.876649953 | 0.308068 | 38.9305  |
| -0.538889644 | 0.997548 | 0.00618  |
| 0.270498561  | 0.988401 | -0.0344  |
| -0.444999737 | 0.986918 | 0.02112  |
| -0.46576045  | 0.96688  | -0.06094 |
| -0.871613225 | 0.596728 | 0.41339  |
| 0.415037499  | 0.785211 | -0.80735 |
| 1.765137473  | 0.710922 | 1.28079  |
| 1.087462841  | 0.925659 | 0.16993  |
| 9.836784381  | 0.317433 | 11.9959  |
| -36.56605978 | ?        | -45.8846 |
| #NUM!        | 0.308068 | #NUM!    |
| -1.1490812   | 0.677858 | -0.72647 |
| -0.174520753 | 0.579281 | 0.36751  |
| -1.090364028 | 0.789183 | -0.40136 |

|              |           |          |
|--------------|-----------|----------|
| #DIV/0!      | ?         | #DIV/0!  |
| -0.424497829 | 0.757723  | -0.31487 |
| -2.807354922 | 0.236154  | -1.22239 |
| #DIV/0!      | ?         | #DIV/0!  |
| -1.282399731 | 0.962321  | -0.08246 |
| -0.871905765 | 0.968913  | 0.03039  |
| -0.246160587 | 0.941975  | -0.11784 |
| -0.832668254 | 0.943667  | -0.11332 |
| -0.902080462 | 0.900184  | 0.14582  |
| -0.430705676 | 0.978688  | 0.04362  |
| -0.639260017 | 0.843658  | 0.16875  |
| -0.787455365 | 0.83263   | 0.3265   |
| -0.261516033 | 0.800415  | 0.50472  |
| -1.741931847 | 1         | 0        |
| 0.009504852  | 0.838458  | -0.34728 |
| -0.647138774 | 0.958332  | -0.04475 |
| -0.65732382  | 0.98562   | 0.0164   |
| -0.453454087 | 0.994604  | -0.00512 |
| -0.755074975 | 0.850922  | 0.25753  |
| -1.343927328 | 0.374123  | 1.18804  |
| -1.389782976 | 0.771211  | 0.40967  |
| -1.744269816 | 0.844354  | 0.27818  |
| -0.357411092 | 0.995826  | -0.00928 |
| -0.312492019 | 0.997323  | -0.00564 |
| #DIV/0!      | ?         | #DIV/0!  |
| 1            | 0.622002  | #NUM!    |
| 1.185054448  | 0.0919779 | 1.69762  |
| #DIV/0!      | 0.308068  | #DIV/0!  |
| #DIV/0!      | ?         | #DIV/0!  |
| -94.93922732 | 0.91575   | -0.19219 |
| -0.641923427 | 0.785613  | 0.19698  |
| 0.520832163  | 0.671489  | -0.71621 |
| 0            | 0.751131  | -0.63387 |
| 0.271736431  | 0.753382  | 0.47896  |
| -0.692787162 | 0.659733  | -0.61329 |
| 0.201316641  | 0.683783  | 0.60027  |
| 0.245668416  | 0.907971  | -0.27594 |
| -0.088133165 | 0.80359   | 0.49971  |
| -0.109041735 | 0.929997  | -0.12801 |
| -0.703908254 | 0.465373  | -2.39355 |
| -0.191700032 | 0.94505   | 0.11937  |
| -3.5852641   | 0.262449  | -0.53394 |
| -1.725137954 | 0.498867  | -0.9623  |
| -1.426889474 | 0.72607   | -0.50218 |
| #DIV/0!      | 1         | #DIV/0!  |
| #DIV/0!      | ?         | #DIV/0!  |
| #DIV/0!      | ?         | #DIV/0!  |
| #DIV/0!      | ?         | #DIV/0!  |
| #DIV/0!      | ?         | #DIV/0!  |
| -1.050626073 | 0.961458  | 0.04891  |
| #DIV/0!      | ?         | #DIV/0!  |
| #DIV/0!      | ?         | #DIV/0!  |
| #DIV/0!      | ?         | #DIV/0!  |
| 1.27064759   | 0.0559061 | 0.72316  |
| -2           | 0.624065  | 1        |
| #DIV/0!      | ?         | #DIV/0!  |

|              |          |          |
|--------------|----------|----------|
| #DIV/0!      | ?        | #DIV/0!  |
| -1.192645078 | 0.947152 | -0.09311 |
| 0.90442234   | 0.791995 | 0.35845  |
| -0.710493383 | 0.906867 | -0.20645 |
| #NUM!        | 1        | 0        |
| 1.137503524  | 0.933386 | 0.26303  |
| #DIV/0!      | ?        | #DIV/0!  |
| #NUM!        | 0.622002 | -1       |
| -0.440572591 | 0.914223 | 0.14439  |
| -1.914270126 | 0.151016 | -0.97085 |
| -0.514573173 | 0.393741 | 0.58496  |
| #DIV/0!      | ?        | #DIV/0!  |
| -0.736965594 | 0.593125 | -1.32193 |
| #DIV/0!      | ?        | #DIV/0!  |
| -0.415037499 | 0.681777 | 0.45943  |
| 0.415037499  | 0.464162 | 1.12776  |
| -2.459431619 | 0.76082  | -0.28951 |
| #DIV/0!      | 0.3832   | #DIV/0!  |
| -1.378511623 | 0.873517 | 0.29956  |
| -1.584962501 | 0.387299 | 0.78427  |
| #DIV/0!      | ?        | #DIV/0!  |
| -0.381090167 | 0.706137 | 0.56768  |
| #DIV/0!      | ?        | #DIV/0!  |
| -0.213853796 | 0.979958 | -0.04008 |
| #DIV/0!      | ?        | #DIV/0!  |
| #DIV/0!      | ?        | #DIV/0!  |
| #DIV/0!      | ?        | #DIV/0!  |
| #DIV/0!      | ?        | #DIV/0!  |
| #DIV/0!      | ?        | #DIV/0!  |
| #DIV/0!      | ?        | #DIV/0!  |
| #DIV/0!      | ?        | #DIV/0!  |
| #DIV/0!      | ?        | #DIV/0!  |
| #DIV/0!      | ?        | #DIV/0!  |
| #DIV/0!      | ?        | #DIV/0!  |
| #DIV/0!      | ?        | #DIV/0!  |
| #DIV/0!      | ?        | #DIV/0!  |
| #DIV/0!      | ?        | #DIV/0!  |
| #DIV/0!      | ?        | #DIV/0!  |
| #DIV/0!      | ?        | #DIV/0!  |
| #DIV/0!      | ?        | #DIV/0!  |
| #DIV/0!      | ?        | #DIV/0!  |
| #DIV/0!      | ?        | #DIV/0!  |
| #DIV/0!      | ?        | #DIV/0!  |
| #DIV/0!      | ?        | #DIV/0!  |
| 25.26037692  | 1        | 3.25584  |
| #DIV/0!      | ?        | #DIV/0!  |
| #DIV/0!      | ?        | #DIV/0!  |
| -1.415037499 | 1        | 0        |
| #DIV/0!      | ?        | #DIV/0!  |
| #DIV/0!      | ?        | #DIV/0!  |
| #NUM!        | 0.308068 | #NUM!    |
| -4.330932138 | 0.606142 | 1.05899  |
| #DIV/0!      | ?        | #DIV/0!  |
| #DIV/0!      | ?        | #DIV/0!  |
| #DIV/0!      | ?        | #DIV/0!  |
| #DIV/0!      | ?        | #DIV/0!  |
| #NUM!        | 1        | 0        |
| #DIV/0!      | ?        | #DIV/0!  |

|              |          |         |
|--------------|----------|---------|
| #DIV/0!      | ?        | #DIV/0! |
| #DIV/0!      | ?        | #DIV/0! |
| #DIV/0!      | ?        | #DIV/0! |
| #DIV/0!      | ?        | #DIV/0! |
| #DIV/0!      | ?        | #DIV/0! |
| -11.72209341 | 0.930481 | 0.11005 |
| #DIV/0!      | ?        | #DIV/0! |
| #DIV/0!      | 1        | #DIV/0! |
| #DIV/0!      | ?        | #DIV/0! |
| #DIV/0!      | ?        | #DIV/0! |
| #DIV/0!      | ?        | #DIV/0! |
| #DIV/0!      | ?        | #DIV/0! |
| #DIV/0!      | ?        | #DIV/0! |
| #DIV/0!      | ?        | #DIV/0! |
| -1           | 0.651448 | -1      |
| #DIV/0!      | ?        | #DIV/0! |
| #DIV/0!      | ?        | #DIV/0! |
| #DIV/0!      | ?        | #DIV/0! |
| -0.793549123 | 0.966693 | 0.05445 |
| #DIV/0!      | ?        | #DIV/0! |
| #DIV/0!      | 0.308068 | #DIV/0! |
| #NUM!        | 0.308068 | #NUM!   |
| #DIV/0!      | ?        | #DIV/0! |
| -1.700439718 | 0.697379 | 0.75283 |
| #DIV/0!      | ?        | #DIV/0! |
| #DIV/0!      | ?        | #DIV/0! |
| #NUM!        | 0.308068 | #NUM!   |
| #DIV/0!      | ?        | #DIV/0! |
| #DIV/0!      | ?        | #DIV/0! |
| #DIV/0!      | ?        | #DIV/0! |
| #DIV/0!      | ?        | #DIV/0! |
| #DIV/0!      | ?        | #DIV/0! |
| #DIV/0!      | ?        | #DIV/0! |
| #DIV/0!      | ?        | #DIV/0! |
| #DIV/0!      | ?        | #DIV/0! |
| #DIV/0!      | ?        | #DIV/0! |
| #DIV/0!      | ?        | #DIV/0! |
| -4.330932138 | 0.606142 | 1.05899 |
| #DIV/0!      | ?        | #DIV/0! |
| #DIV/0!      | ?        | #DIV/0! |
| #DIV/0!      | ?        | #DIV/0! |
| #DIV/0!      | ?        | #DIV/0! |
| #DIV/0!      | ?        | #DIV/0! |
| #DIV/0!      | ?        | #DIV/0! |
| #DIV/0!      | ?        | #DIV/0! |
| #DIV/0!      | ?        | #DIV/0! |
| #DIV/0!      | ?        | #DIV/0! |
| #DIV/0!      | ?        | #DIV/0! |
| #DIV/0!      | ?        | #DIV/0! |
| #DIV/0!      | ?        | #DIV/0! |
| #DIV/0!      | ?        | #DIV/0! |
| #DIV/0!      | ?        | #DIV/0! |
| 69.01852502  | 1        | 23.2641 |
| #DIV/0!      | ?        | #DIV/0! |
| #DIV/0!      | ?        | #DIV/0! |
| #DIV/0!      | ?        | #DIV/0! |
| #DIV/0!      | ?        | #DIV/0! |

|              |          |          |
|--------------|----------|----------|
| -0.601356939 | 0.765525 | 0.30883  |
| #DIV/0!      | 0.450253 | #DIV/0!  |
| #NUM!        | ?        | -53.5548 |
| #DIV/0!      | ?        | #DIV/0!  |
| -0.121906669 | 0.238574 | 1.0579   |
| -22.93552398 | 0.308069 | -18.1973 |
| #DIV/0!      | ?        | #DIV/0!  |
| 0.128501966  | 0.888962 | -0.24584 |
| -0.249896701 | 0.725544 | 0.40615  |
| #NUM!        | 0.583577 | -1.00002 |
| -0.249896701 | 0.725544 | 0.40615  |
| #DIV/0!      | ?        | #DIV/0!  |
| -29.67231832 | ?        | 2.45943  |
| -0.426243165 | 0.87924  | 0.24119  |
| -0.132013114 | 0.995264 | -0.00883 |
| -0.654864514 | 0.909577 | -0.18709 |
| -0.252945588 | 0.97688  | 0.0426   |
| -0.191592144 | 0.873122 | -0.27835 |
| -0.311379245 | 0.995129 | -0.00862 |
| -0.570097151 | 0.924698 | -0.12141 |
| -0.148447686 | 0.956567 | 0.09252  |
| -0.682174943 | 0.91353  | 0.10501  |
| #DIV/0!      | 1        | #DIV/0!  |
| -0.238851701 | 0.984257 | 0.03627  |
| -0.496908521 | 0.896752 | -0.23768 |
| -2.019942707 | 0.612449 | -0.87188 |
| -0.851949908 | 0.988599 | -0.02139 |
| -0.859154175 | 0.929938 | 0.13032  |
| 0.129321866  | 0.952817 | 0.09409  |
| -1.37462884  | 0.97331  | 0.04436  |
| -1.586137812 | 0.977191 | -0.04172 |
| -0.315523249 | 0.9616   | 0.07079  |
| -0.11414057  | 0.973168 | -0.0581  |
| -0.956278623 | 0.706592 | -0.66482 |
| -0.455679484 | 0.951771 | -0.0993  |
| -0.396356924 | 0.976952 | -0.04406 |
| 0.16578141   | 0.906288 | 0.1407   |
| -0.979186989 | 0.938524 | -0.0743  |
| -0.366619397 | 0.997558 | 0.0053   |
| -0.067114196 | 0.857015 | 0.29546  |
| 0.342601663  | 0.986688 | -0.03006 |
| -1.361307683 | 0.978418 | 0.04608  |
| -0.086280971 | 0.793893 | -0.52386 |
| -1.0482288   | 0.833218 | -0.34116 |
| -1.208290978 | 0.86917  | 0.2452   |
| 0.116098677  | 0.899182 | 0.25765  |
| -0.383251369 | 0.936752 | -0.14378 |
| -2.49082058  | 0.643564 | -0.75186 |
| -0.892741786 | 0.839488 | -0.32833 |
| -0.366503007 | 0.900903 | -0.22015 |
| -0.044861286 | 0.998982 | -0.00207 |
| -0.439307849 | 0.895927 | -0.20726 |
| 0.151079473  | 0.859023 | 0.24951  |
| -0.325778707 | 0.80711  | 0.2212   |
| -1.338801913 | 0.868831 | -0.21681 |
| -0.498740383 | 0.953167 | -0.06153 |



|              |          |          |
|--------------|----------|----------|
| -0.636871535 | 0.952919 | -0.08829 |
| 0.569560374  | 0.750364 | 0.67088  |
| -0.55491847  | 0.951361 | -0.09135 |
| -0.54168645  | 0.963607 | 0.06478  |
| -0.540050079 | 0.947657 | -0.10823 |
| -0.312507302 | 0.966947 | 0.0636   |
| 0.14888559   | 0.935301 | 0.13658  |
| -2.584962501 | 0.724378 | 0.22239  |
| -0.878153516 | 0.854352 | -0.25181 |
| -0.870777336 | 0.992094 | 0.00947  |
| -0.366706249 | 0.976808 | -0.04006 |
| -0.628031223 | 0.8816   | -0.2378  |
| 0.035431179  | 0.934113 | 0.13287  |
| -0.295443801 | 0.925545 | -0.16323 |
| -0.233507024 | 0.621224 | -1.26739 |
| -0.535292358 | 0.975907 | -0.0537  |
| -0.915302835 | 0.95943  | -0.08286 |
| -0.386613897 | 0.978086 | 0.03425  |
| -0.379459004 | 0.988844 | -0.02052 |
| -0.157964022 | 0.981971 | 0.03525  |
| -0.361382987 | 0.903235 | -0.21035 |
| -0.77823037  | 0.906694 | -0.16612 |
| -0.252118628 | 0.971543 | -0.05269 |
| -0.807354922 | 0.648511 | -0.80735 |
| -0.771060361 | 0.689525 | -0.65076 |
| -0.558741445 | 0.915134 | -0.14571 |
| -0.499618753 | 0.995641 | 0.00587  |
| -0.194662363 | 0.905276 | 0.1453   |
| -0.420953259 | 0.729703 | 0.22763  |
| -0.234234034 | 0.940826 | 0.08584  |
| -0.347923303 | 0.8484   | -0.28863 |
| -0.361574087 | 0.96678  | 0.0557   |
| -0.442943496 | 0.99494  | 0.00827  |
| -0.30879037  | 0.984853 | 0.0224   |
| -0.350361081 | 0.897771 | -0.19382 |
| -0.629422672 | 0.913244 | -0.14093 |
| -0.660513534 | 0.768135 | -0.20532 |
| -0.385972149 | 0.867391 | -0.29373 |
| -0.041662639 | 0.970202 | 0.0663   |
| -0.065009896 | 1        | 0        |
| -0.321928095 | 0.861884 | -0.31166 |
| 0.584962501  | 0.810902 | 0.58496  |
| -0.380224529 | 0.885021 | 0.1689   |
| -0.359366664 | 0.997694 | -0.00359 |
| -0.347383676 | 0.968832 | -0.06373 |
| -0.505442161 | 0.912872 | -0.11103 |
| -0.369432104 | 0.895668 | -0.20471 |
| -0.271151164 | 0.972318 | 0.04946  |
| -0.134957341 | 0.848413 | 0.20502  |
| -0.381922251 | 0.916863 | 0.14106  |
| -0.409490548 | 0.970697 | 0.05461  |
| -0.873269594 | 0.665229 | -0.36889 |
| -3.173192715 | 0.077075 | -1.81062 |
| 0.289506617  | 0.930262 | 0.152    |
| 0.514573173  | 0.853781 | 0.41504  |
| 0.354242608  | 0.990272 | -0.0217  |

|              |          |          |
|--------------|----------|----------|
| 0.394712796  | 0.942475 | 0.13013  |
| -0.861802706 | 0.825305 | -0.37737 |
| -0.803335529 | 0.584884 | 0.75599  |
| -0.066248947 | 0.989105 | 0.02589  |
| -0.285456538 | 0.9746   | -0.05401 |
| -0.588622122 | 0.944791 | -0.0958  |
| -0.623900843 | 0.923106 | 0.08575  |
| -0.451299747 | 0.936639 | -0.11346 |
| -1.105847913 | 0.654781 | -0.28326 |
| -0.141413269 | 0.990557 | -0.02197 |
| -0.792708146 | 0.956592 | -0.05138 |
| -0.646446794 | 0.789752 | -0.39654 |
| -1.038005372 | 0.698326 | -0.58261 |
| -0.279434549 | 0.947099 | 0.10791  |
| -0.87102684  | 0.797287 | -0.36118 |
| -0.436104318 | 0.875694 | -0.22091 |
| -0.522321216 | 0.997243 | -0.00432 |
| 0.2410081    | 0.910106 | -0.16665 |
| -0.238847628 | 0.96733  | -0.06512 |
| -0.562016296 | 0.989687 | 0.01873  |
| 0.106915204  | 1        | 0        |
| -0.304423694 | 0.976591 | 0.04494  |
| -0.460181828 | 0.934554 | 0.14029  |
| -0.67930375  | 0.822741 | 0.2443   |
| 1.265030714  | 0.571091 | 1.2255   |
| #DIV/0!      | 1        | #DIV/0!  |
| -0.593867406 | 0.959572 | 0.04539  |
| -0.247370452 | 0.998259 | -0.00347 |
| -0.173940479 | 0.932473 | 0.11494  |
| -0.677193374 | 0.843584 | -0.30012 |
| -0.36558197  | 0.950087 | 0.09414  |
| -0.336916976 | 0.986225 | -0.02624 |
| -0.375989347 | 0.980969 | 0.03236  |
| -0.749786207 | 0.968785 | -0.05278 |
| 0.271302022  | 0.952642 | 0.09622  |
| -0.177668534 | 0.922526 | 0.14078  |
| -0.453433847 | 0.988218 | -0.02306 |
| -0.277533976 | 0.955402 | 0.07662  |
| -0.547487795 | 0.969589 | -0.06553 |
| -0.174235181 | 0.935194 | 0.10555  |
| -0.537722427 | 0.966699 | 0.0547   |
| -0.386792181 | 0.958939 | 0.06027  |
| -0.853323534 | 0.6677   | -0.16444 |
| -0.541091881 | 0.938706 | -0.11442 |
| -0.663321119 | 0.977223 | -0.02262 |
| -0.943739427 | 0.808316 | -0.08799 |
| -0.385045112 | 0.739758 | 0.25917  |
| -0.430267864 | 0.98038  | 0.02382  |
| -0.331563987 | 0.999998 | 1.8E-06  |
| -0.110271871 | 0.963851 | 0.07521  |
| -0.35979845  | 0.877918 | -0.2675  |
| -0.251746334 | 0.982881 | -0.0353  |
| -0.492025397 | 0.966761 | -0.06977 |
| 0.054481403  | 0.922365 | 0.16143  |
| -2.190427769 | 0.982053 | 0.02497  |
| -0.452695625 | 0.96188  | -0.07281 |

|              |            |          |
|--------------|------------|----------|
| 0.287162565  | 0.880456   | 0.26689  |
| -2.209453366 | 0.767609   | -0.45457 |
| -0.135285699 | 0.968915   | -0.06711 |
| -0.619624531 | 0.87402    | -0.2208  |
| 0.136773692  | 0.934037   | 0.11508  |
| #DIV/0!      | ?          | #DIV/0!  |
| -0.160889569 | 0.947823   | 0.0913   |
| 0            | 0.3646     | 1.80735  |
| -0.897240426 | 0.54414    | -1.13171 |
| -0.248625794 | 0.908322   | 0.12837  |
| 0            | 1          | 0        |
| #DIV/0!      | 0.450185   | #DIV/0!  |
| -0.377836836 | 0.838193   | -0.3604  |
| -1.057399435 | 0.767061   | 0.41119  |
| -0.33430002  | 0.939092   | -0.12429 |
| -0.521697607 | 0.833644   | 0.2316   |
| 2.514999943  | 0.630288   | 1.68658  |
| -1.889817082 | 0.745226   | -0.27684 |
| #DIV/0!      | ?          | #DIV/0!  |
| -0.514360762 | 0.399189   | 0.30464  |
| -2.434182549 | 0.466561   | -1.51924 |
| -0.716207034 | 0.778371   | -0.4361  |
| -1.222798072 | 0.748222   | -0.5001  |
| -0.813586876 | 0.753572   | -0.39855 |
| -0.349074237 | 0.872768   | 0.17086  |
| 0.056591749  | 0.952754   | 0.08608  |
| #NUM!        | 1          | 0        |
| 0.593679718  | 1          | 0        |
| -1.052321035 | 0.71401    | 0.40114  |
| 0.692375443  | 0.949958   | 0.12988  |
| -0.900162655 | 0.978592   | 0.02491  |
| 0            | 0.651448   | 1        |
| -1.667424661 | 0.989974   | -0.01792 |
| -0.572491984 | 0.898814   | -0.18618 |
| -1.199505992 | 0.521494   | -0.66008 |
| #DIV/0!      | ?          | #DIV/0!  |
| #DIV/0!      | ?          | #DIV/0!  |
| -0.229481846 | 0.687125   | -0.69515 |
| -0.410545696 | 0.875119   | -0.25326 |
| -0.517061933 | 0.695934   | 0.30312  |
| -0.571466658 | 1          | 0        |
| -2.00507099  | 0.912367   | -0.14919 |
| -0.587465008 | 0.986421   | -0.01761 |
| -0.487888868 | 0.941135   | 0.02328  |
| #DIV/0!      | ?          | #DIV/0!  |
| -0.347923303 | 0.964045   | -0.0614  |
| #NUM!        | 0.0162766  | #NUM!    |
| -0.651803623 | 0.75066    | -0.51439 |
| -0.222392421 | 0.562529   | -1.80735 |
| -1.111146089 | 0.633085   | -0.37018 |
| -1.093109404 | 0.83173    | -0.35614 |
| -1.700439718 | 0.621075   | -0.89308 |
| -0.539928747 | 0.908432   | -0.17963 |
| 2.700439718  | 0.00324583 | 3.44294  |
| 0.088728919  | 0.431104   | 0.64816  |
| 0.103093493  | 0.540033   | 0.90332  |

|              |           |          |
|--------------|-----------|----------|
| -0.362082715 | 0.621001  | -1.15504 |
| -2.584962501 | 0.479515  | -1.58496 |
| 0.736965594  | 0.855216  | -0.58496 |
| -1           | 0.308068  | -2       |
| -1.321928095 | 0.361235  | 0.67807  |
| -0.596289642 | 0.865525  | -0.18676 |
| 0.192645078  | 0.610883  | -1.80735 |
| -2.137503524 | 0.862571  | 0.12553  |
| -0.598693217 | 0.999609  | -0.00049 |
| -0.148219887 | 0.820723  | 0.36506  |
| -0.090125546 | 0.976579  | 0.05365  |
| -0.309353598 | 0.635768  | 0.34985  |
| -0.316779547 | 0.889283  | 0.18853  |
| 0.051762095  | 0.863689  | 0.28521  |
| -0.584962501 | 0.577912  | 1.22239  |
| -0.610679824 | 0.933038  | -0.12324 |
| 0.43779425   | 0.545403  | 0.70553  |
| -0.584962501 | 0.834708  | 0.41504  |
| -0.566103473 | 0.979015  | 0.03542  |
| 0            | 0.370757  | #NUM!    |
| -0.346777449 | 0.9552    | 0.07168  |
| -0.189989009 | 0.950707  | 0.09721  |
| 1.115477217  | 0.152448  | 2.27302  |
| 1            | 0.272228  | 2.80735  |
| -1.349672342 | 0.533256  | -1.32945 |
| -0.597360475 | 0.964051  | -0.0828  |
| -0.636481154 | 0.950674  | 0.05612  |
| 0.083657929  | 0.589082  | 0.75409  |
| 0.022637804  | 0.298515  | 0.63687  |
| 0.036994207  | 0.958144  | 0.09077  |
| -0.350945484 | 0.923305  | 0.08441  |
| 0.736965594  | 0.719564  | 0.81714  |
| -0.43759609  | 0.92544   | -0.13872 |
| 1.222392421  | 0.494536  | 2        |
| -0.466220448 | 0.941324  | -0.12236 |
| -1.244210532 | 0.882457  | -0.27336 |
| 0.169925001  | 0.88591   | 0.29278  |
| 0.184424571  | 0.973272  | -0.06711 |
| -0.4639471   | 0.928704  | -0.1321  |
| -1.405642337 | 0.643561  | -0.65841 |
| 1.222392421  | 0.895809  | 0.41504  |
| -0.623484075 | 0.870712  | -0.19218 |
| -0.945264769 | 0.972253  | -0.04869 |
| -0.634612791 | 0.843656  | -0.26264 |
| -0.444302094 | 0.9164    | 0.13276  |
| 0.874469118  | 0.864102  | -0.41504 |
| 0.415037499  | 0.595411  | -1.58496 |
| -1.479992941 | 0.0688662 | -0.97303 |
| -1.250636801 | 0.907521  | -0.17892 |
| -0.648870497 | 0.936628  | 0.06114  |
| -0.906153398 | 0.938334  | -0.10592 |
| #DIV/0!      | ?         | #DIV/0!  |
| -0.115477217 | 0.942559  | -0.11548 |
| -0.306715318 | 0.930431  | 0.08334  |
| #DIV/0!      | ?         | #DIV/0!  |
| -0.544378653 | 0.850369  | -0.27255 |

|              |          |          |
|--------------|----------|----------|
| 0.285817801  | 0.622125 | -1.18418 |
| -0.865107662 | 0.672517 | -0.17677 |
| -0.733606582 | 0.967173 | -0.06184 |
| -1.228268988 | 0.960959 | -0.09077 |
| 0.85160816   | 0.629224 | 0.97262  |
| #NUM!        | 0.308068 | #NUM!    |
| #DIV/0!      | 0.536192 | #DIV/0!  |
| -0.425692401 | 0.933833 | -0.16248 |
| -0.570354414 | 0.960565 | 0.04772  |
| -0.535228621 | 0.883193 | -0.26454 |
| 0.360442524  | 0.755369 | 0.46395  |
| -0.432959407 | 0.648511 | 0.63743  |
| -2.378511623 | 0.799938 | -0.37851 |
| -0.305880374 | 0.985191 | -0.02102 |
| #DIV/0!      | ?        | #DIV/0!  |
| -0.415037499 | 0.735995 | -0.77761 |
| -0.584962501 | 0.3832   | #NUM!    |
| 0.584962501  | 0.594273 | 1        |
| -1           | 0.353387 | #NUM!    |
| #DIV/0!      | ?        | #DIV/0!  |
| 0            | 1        | 0        |
| -0.92975083  | 0.64649  | 0.3839   |
| -0.658963082 | 0.840917 | -0.32193 |
| -0.359013356 | 0.991415 | -0.01882 |
| 1.398549376  | 0.945552 | 0.24101  |
| -2.834221528 | 0.497547 | -0.49719 |
| -1.008315268 | 0.826771 | -0.2915  |
| -0.695041115 | 0.759391 | -0.10627 |
| -0.503662399 | 0.971565 | -0.06413 |
| -0.766700735 | 0.764005 | -0.27659 |
| -0.3415315   | 0.764354 | -0.5924  |
| -0.986049088 | 0.499228 | -1.37122 |
| -0.279619468 | 0.858917 | -0.25806 |
| 0.321928095  | 0.429254 | 1.32193  |
| -0.405818969 | 0.960973 | 0.07105  |
| -1.675288698 | 0.749335 | 0.52469  |
| #NUM!        | 1        | 0        |
| #DIV/0!      | ?        | #DIV/0!  |
| #DIV/0!      | 0.308068 | #DIV/0!  |
| -0.584962501 | 1        | 0        |
| -1.620151929 | 0.384364 | -1.12711 |
| -1.807354922 | 0.776099 | 0.36257  |
| -0.422517407 | 0.990799 | -0.01216 |
| 0.678071905  | 0.250939 | 1.926    |
| -1.236881362 | 0.542558 | -1.14466 |
| 0.305251808  | 0.857726 | -0.3172  |
| 0.757587818  | 0.755763 | 0.72059  |
| #DIV/0!      | ?        | #DIV/0!  |
| -0.392317423 | 0.622002 | -0.22239 |
| -0.538199959 | 0.948639 | 0.0664   |
| -0.358079596 | 0.921502 | 0.11301  |
| -0.315501826 | 0.780492 | -0.38109 |
| -2.105651788 | 0.591089 | -0.84144 |
| -0.498568877 | 0.883684 | -0.27105 |
| -0.330357784 | 0.884112 | 0.24929  |
| -0.572828745 | 0.849487 | -0.32071 |

|              |            |          |
|--------------|------------|----------|
| 0.26710407   | 0.827089   | 0.40276  |
| -0.697971463 | 0.652918   | 0.49668  |
| -0.392429857 | 0.91758    | -0.17172 |
| -1.678071905 | 0.645355   | -0.77761 |
| -3.772589504 | 0.00769782 | -3.35755 |
| 0.407002319  | 0.275827   | 1.52075  |
| -1.047305715 | 0.761984   | -0.31034 |
| -0.558925627 | 0.983135   | 0.03827  |
| 0.128733314  | 0.974454   | -0.05889 |
| -1.504903402 | 0.487243   | -1.30352 |
| -1.54392272  | 0.939768   | -0.0431  |
| -1           | 0.989384   | 0.01609  |
| -0.391482771 | 0.760654   | 0.4962   |
| #DIV/0!      | 1          | #DIV/0!  |
| #DIV/0!      | ?          | #DIV/0!  |
| -1.46829248  | 0.529904   | -0.92281 |
| 0.192645078  | 0.610883   | -1.80735 |
| #DIV/0!      | ?          | #DIV/0!  |
| -0.901837978 | 0.957073   | -0.02393 |
| -0.337841458 | 0.943626   | 0.06201  |
| -0.696930932 | 0.855362   | -0.24442 |
| -2.426264755 | 0.93918    | -0.0788  |
| -0.107732106 | 0.947714   | -0.10392 |
| -0.777501802 | 0.824928   | 0.34279  |
| -2.336283388 | 0.0753681  | -1.57075 |
| 0.275634443  | 0.905669   | -0.2123  |
| -0.379759711 | 0.993364   | 0.0113   |
| 2            | 0.481309   | 2        |
| -0.939879008 | 0.975781   | 0.03037  |
| -0.474568703 | 0.877014   | 0.1766   |
| -1.526240062 | 0.286241   | -2.75275 |
| -2.324594998 | 0.0947128  | -3.33061 |
| -3.26382514  | 0.59971    | -0.83933 |
| -0.373300197 | 0.994847   | 0.00954  |
| -0.299219555 | 0.942659   | -0.12808 |
| 0.103835811  | 0.872492   | 0.1913   |
| -0.18458166  | 0.962597   | -0.07386 |
| -0.552147704 | 0.94022    | -0.09291 |
| -2.137503524 | 0.569723   | -0.65208 |
| -1.226388809 | 0.745601   | -0.54657 |
| -0.657894023 | 0.968134   | -0.06228 |
| 1.673189684  | 0.182544   | 2.10343  |
| -0.328031464 | 0.778096   | 0.25407  |
| 1.530514717  | 0.573212   | 1.28951  |
| -0.885229813 | 0.80876    | -0.32884 |
| -0.652076697 | 0.799423   | 0.32193  |
| 0.235530891  | 0.700748   | 0.60519  |
| -1.484338043 | 0.515623   | -1.58947 |
| -0.703437695 | 0.89042    | -0.20798 |
| -1.273018494 | 0.750002   | -0.61005 |
| -1.187500149 | 0.86284    | 0.2222   |
| -0.151113265 | 0.839966   | -0.3979  |
| 0.736965594  | 0.836473   | 0.38517  |
| -0.177809826 | 0.966452   | 0.07026  |
| -0.369387203 | 0.951303   | -0.08372 |
| -1.894165402 | 0.778924   | 0.41431  |

|              |          |          |
|--------------|----------|----------|
| -0.033608393 | 0.824907 | -0.40244 |
| -0.362181579 | 0.989141 | 0.01879  |
| -0.366554434 | 0.941258 | 0.10104  |
| -1.436639754 | 0.894028 | 0.22108  |
| -1.077478753 | 0.827777 | 0.24644  |
| -1.050626073 | 0.666873 | -0.39855 |
| 0.319068441  | 0.832164 | 0.33551  |
| -0.628905848 | 0.675333 | 0.65382  |
| #DIV/0!      | 0.450185 | #DIV/0!  |
| -0.587135086 | 0.832319 | 0.21623  |
| 2.396890153  | 0.716674 | 1.22239  |
| -1.609545509 | 0.480134 | -0.39798 |
| -0.259496607 | 0.846144 | 0.19022  |
| -0.540568381 | 0.957401 | 0.08746  |
| #DIV/0!      | ?        | #DIV/0!  |
| -0.275179836 | 0.906851 | -0.15489 |
| -1.015266757 | 0.764711 | -0.48239 |
| -0.379823133 | 0.981596 | 0.02666  |
| #DIV/0!      | ?        | #DIV/0!  |
| #DIV/0!      | 0.308068 | #DIV/0!  |
| -2.321928095 | 0.84925  | 0.26303  |
| -0.952327583 | 0.988112 | -0.01746 |
| -0.415037499 | 0.415659 | 1.38082  |
| -0.35558707  | 0.959571 | 0.04183  |
| #DIV/0!      | 0.450185 | #DIV/0!  |
| 0.235531116  | 0.698916 | -0.78591 |
| -0.85594903  | 0.983371 | -0.03499 |
| -0.329064276 | 0.995557 | 0.00946  |
| -0.293781012 | 0.759729 | -0.45407 |
| -0.372585358 | 0.870195 | -0.16252 |
| 0.012786155  | 0.749573 | 0.40753  |
| -0.069966076 | 0.92917  | -0.18268 |
| 0            | 1        | 0        |
| -2.070389328 | 0.731365 | -0.30485 |
| 0.301380717  | 0.98183  | 0.04307  |
| -4.087462841 | 0.043925 | -3.08746 |
| -0.188591929 | 0.938896 | 0.09173  |
| -0.542767073 | 0.925766 | 0.1132   |
| #NUM!        | 0.308068 | #NUM!    |
| 1            | 0.622002 | #NUM!    |
| -0.720073136 | 0.893909 | -0.08798 |
| #NUM!        | 0.198892 | -0.67807 |
| -1.74371019  | 0.831216 | 0.13481  |
| -0.122335543 | 0.860804 | -0.25601 |
| -2.26514919  | 0.78224  | -0.19022 |
| -0.011404763 | 0.870277 | 0.20255  |
| -1.091000934 | 0.818426 | -0.30589 |
| -0.724231563 | 0.833577 | -0.32687 |
| -0.727474145 | 0.729609 | 0.39707  |
| -0.532748296 | 0.978399 | 0.03847  |
| -0.486075906 | 0.947285 | 0.07472  |
| 0.540568381  | 1        | 0        |
| -0.19364107  | 0.819482 | 0.18456  |
| -0.233577558 | 0.954559 | 0.0797   |
| -1.142054616 | 0.959835 | 0.0774   |
| -0.870479627 | 0.989249 | -0.01446 |

|              |          |          |
|--------------|----------|----------|
| -0.565878955 | 0.451977 | 0.4757   |
| -0.87523144  | 0.65526  | -0.78974 |
| -0.331688754 | 0.978431 | 0.03109  |
| -0.237465085 | 0.972644 | -0.05975 |
| -0.80643814  | 0.823619 | 0.30217  |
| -0.253118937 | 0.898694 | 0.16966  |
| -0.313467769 | 0.963794 | -0.06077 |
| 0.087252054  | 0.991739 | 0.01743  |
| -0.016678741 | 0.839679 | -0.36969 |
| 1.415037499  | 0.612488 | 1.35364  |
| -0.578578884 | 0.869393 | -0.22453 |
| -0.346368954 | 0.934675 | 0.0839   |
| -0.153116714 | 0.910979 | 0.15522  |
| -0.505067827 | 0.976684 | 0.04203  |
| -0.807831413 | 0.899649 | -0.12709 |
| -0.445103206 | 0.956658 | 0.07808  |
| -0.749902683 | 0.889687 | -0.21575 |
| 0.805547662  | 0.691096 | 0.74983  |
| -0.921263329 | 0.831102 | -0.23594 |
| -0.621086829 | 0.780917 | -0.42377 |
| -0.267243451 | 0.953327 | 0.08429  |
| -0.331709116 | 0.93638  | -0.11775 |
| -0.276023388 | 0.996795 | 0.00676  |
| 0.121668833  | 0.94186  | 0.12531  |
| -0.584962501 | 0.960809 | -0.08137 |
| -0.363345097 | 0.909677 | -0.11995 |
| -0.498277666 | 0.911737 | -0.18653 |
| -0.387617497 | 0.863177 | -0.28758 |
| -0.193775826 | 0.964633 | 0.0602   |
| -0.38507994  | 0.931395 | 0.12015  |
| -0.353709721 | 0.925149 | -0.15543 |
| -0.164567791 | 0.980308 | -0.04556 |
| -0.736965594 | 0.901425 | -0.20645 |
| -0.236851284 | 0.91257  | 0.12868  |
| -0.860689518 | 0.991315 | -0.01777 |
| -1.10479619  | 0.942246 | -0.09873 |
| -0.366271672 | 0.904405 | -0.22725 |
| -0.307343302 | 0.938022 | -0.11417 |
| -0.417584181 | 0.756309 | -0.40054 |
| -1.760812336 | 0.922938 | -0.13632 |
| 0.119082648  | 0.909776 | 0.21088  |
| -0.851076299 | 0.93711  | -0.12861 |
| -0.370454825 | 0.949932 | 0.08552  |
| -0.426246982 | 0.900854 | 0.14928  |
| -0.486944256 | 0.833772 | 0.31775  |
| -0.371790001 | 0.955925 | 0.07309  |
| 0.065737255  | 0.97868  | 0.05096  |
| -0.060541542 | 0.857402 | 0.36476  |
| -0.658354233 | 0.762972 | 0.07345  |
| -0.468171303 | 0.848248 | -0.33812 |
| -0.752072487 | 0.712561 | 0.42626  |
| -0.706707773 | 0.962951 | -0.06831 |
| -0.388585797 | 0.987905 | 0.02571  |
| -0.282399731 | 0.750791 | -0.58496 |
| -0.154551907 | 0.956677 | 0.07406  |
| 0.214124805  | 0.779207 | 0.46467  |



|              |          |          |
|--------------|----------|----------|
| -1.247927513 | 0.961599 | 0.074    |
| -0.354304263 | 0.896422 | 0.19627  |
| -0.106915204 | 0.781117 | -0.22239 |
| 0.456857675  | 0.982934 | 0.04182  |
| -0.458706404 | 0.902033 | 0.16528  |
| -0.434296583 | 0.940477 | -0.12303 |
| -0.040641984 | 0.964229 | 0.078    |
| 0.093525827  | 0.954069 | 0.09665  |
| -0.228684456 | 0.717954 | 0.32206  |
| #DIV/0!      | ?        | #DIV/0!  |
| -1.321928095 | 0.783181 | 0.26303  |
| -0.76464116  | 0.839567 | -0.3188  |
| -0.084597581 | 0.985028 | 0.03043  |
| 0.119298928  | 0.958579 | 0.07276  |
| 2.584962501  | 1        | 0        |
| -0.30256277  | 0.941255 | 0.10524  |
| 0.065588342  | 0.934646 | -0.10434 |
| -0.263874473 | 0.969145 | 0.06165  |
| -0.490750738 | 0.911905 | -0.17502 |
| -0.216358944 | 0.959866 | 0.08138  |
| -0.11189288  | 0.746668 | 0.32049  |
| -0.344949474 | 0.944178 | -0.11343 |
| -1.082018889 | 0.974759 | -0.04922 |
| -0.420508965 | 0.890899 | 0.13426  |
| -0.038889013 | 0.757401 | 0.23331  |
| -0.335184192 | 0.990338 | 0.01749  |
| -0.660380243 | 0.658778 | -0.16261 |
| -0.307570051 | 0.985211 | -0.0271  |
| -0.268550511 | 0.949306 | 0.0888   |
| 0.14839184   | 0.939563 | -0.12553 |
| -1.788495895 | 0.499873 | -0.60407 |
| -0.35696935  | 0.815936 | 0.26627  |
| -0.485807034 | 0.961426 | -0.08414 |
| -1.169925001 | 0.56296  | 0.85244  |
| -0.465663572 | 0.97151  | -0.05063 |
| -0.184410303 | 0.996539 | -0.00772 |
| #NUM!        | 0.308068 | #NUM!    |
| -0.930613937 | 0.939988 | 0.06687  |
| -0.456176194 | 0.91452  | -0.07126 |
| -0.765106075 | 0.986934 | 0.0255   |
| -0.863498    | 0.925493 | 0.12645  |
| 0.305707742  | 0.849516 | 0.28747  |
| #NUM!        | 0.622002 | -1       |
| -0.613018255 | 0.895278 | 0.18524  |
| -0.602912282 | 0.93452  | -0.12573 |
| -1.558730959 | 0.442865 | -1.04026 |
| -0.221127454 | 0.932871 | 0.13336  |
| -1.569263814 | 0.522271 | -1.04815 |
| -1.175849835 | 0.889426 | 0.16202  |
| -0.235721291 | 0.922528 | 0.10403  |
| -0.104023065 | 0.977858 | 0.04933  |
| -1.011404763 | 0.98643  | -0.02804 |
| -0.480916176 | 0.922643 | 0.10736  |
| -0.621034247 | 0.931623 | -0.13699 |
| -0.467841864 | 0.927405 | 0.1145   |
| -0.263034406 | 0.967653 | -0.08246 |

|              |          |          |
|--------------|----------|----------|
| #DIV/0!      | ?        | #DIV/0!  |
| -0.745578724 | 0.931429 | -0.03389 |
| -1.103091835 | 0.990104 | -0.01668 |
| 0            | 1        | 0        |
| -2.191562651 | 0.482023 | -1.43625 |
| -1.10342959  | 0.922384 | -0.15301 |
| -0.466796797 | 0.915353 | -0.14719 |
| 0.440572591  | 0.920005 | -0.10692 |
| -1.500693584 | 0.934954 | -0.11277 |
| -0.151338104 | 0.930668 | 0.10392  |
| -1.750452531 | 0.58202  | -0.54986 |
| -0.96437609  | 0.854025 | -0.2134  |
| -0.20578048  | 0.631497 | 0.47292  |
| -0.23318439  | 0.78743  | 0.23631  |
| -0.676071535 | 0.900135 | 0.11272  |
| -0.313654477 | 0.914974 | -0.19301 |
| -0.367300936 | 0.953346 | -0.10779 |
| -0.733555542 | 0.85029  | -0.23808 |
| -0.147131163 | 0.965516 | 0.07283  |
| -1.468032174 | 0.93274  | -0.12916 |
| -0.062375888 | 0.940504 | -0.12214 |
| -1.417505755 | 0.989755 | -0.00742 |
| -1.053404479 | 0.997332 | -0.003   |
| -0.249265273 | 0.981032 | -0.04029 |
| #NUM!        | 1        | 0        |
| -1.254572827 | 0.794767 | -0.45811 |
| #NUM!        | 0.450185 | -1       |
| -0.151849852 | 0.504986 | 0.44371  |
| -0.15134493  | 0.994987 | 0.01033  |
| -0.449491556 | 0.977968 | 0.0378   |
| -0.413237478 | 0.96314  | -0.08119 |
| -0.039892727 | 0.755892 | 0.41831  |
| -0.210194463 | 0.965053 | -0.05929 |
| 0            | 0.651448 | 1        |
| -0.519309262 | 0.96869  | 0.04334  |
| 0.617784408  | 0.848594 | 0.34731  |
| -0.495371212 | 0.835012 | -0.1985  |
| -0.533290473 | 0.963799 | -0.06081 |
| -0.016694825 | 0.859456 | 0.27211  |
| -0.021626603 | 0.895758 | 0.17531  |
| -0.713286598 | 0.93614  | -0.12832 |
| -0.0489096   | 0.802319 | -0.51457 |
| -0.349104651 | 0.98616  | -0.02617 |
| -0.498043644 | 0.821698 | -0.35213 |
| -0.504170466 | 0.883361 | 0.16166  |
| -0.200913146 | 0.953854 | -0.08854 |
| -0.451230151 | 0.89541  | 0.18929  |
| -0.461218238 | 0.994885 | 0.00906  |
| -0.36906207  | 0.925422 | 0.12054  |
| -0.367839767 | 0.926715 | -0.15722 |
| -0.678071905 | 0.804067 | -0.34104 |
| 0.680333774  | 0.962658 | 0.11455  |
| -1.771375625 | 0.704323 | -0.42479 |
| -2.853451337 | 0.511866 | -1.10343 |
| -0.851901361 | 0.923647 | 0.13632  |
| 0.046216193  | 0.919134 | -0.18125 |

|              |          |          |
|--------------|----------|----------|
| 0.411068597  | 0.938163 | 0.14326  |
| -0.25091812  | 0.987014 | 0.02584  |
| -0.861169104 | 0.952816 | -0.06801 |
| -1.872419431 | 0.914061 | 0.16383  |
| -0.126103721 | 0.955978 | 0.09153  |
| -0.497499659 | 0.818658 | -0.38529 |
| -0.079417315 | 0.910192 | 0.16233  |
| -1.894070145 | 0.451928 | -1.04072 |
| -0.856333427 | 0.971811 | 0.0495   |
| -2.470503776 | 0.345523 | -1.49517 |
| #DIV/0!      | ?        | #DIV/0!  |
| -0.804645635 | 0.93314  | -0.078   |
| -0.297266041 | 0.972561 | -0.05579 |
| -0.459528839 | 0.968074 | -0.0693  |
| 0.183782585  | 0.8976   | 0.19939  |
| -0.263397851 | 0.983978 | -0.0303  |
| -1           | 0.865343 | -0.26303 |
| -0.814133455 | 0.880307 | 0.22754  |
| 0.623583795  | 0.957639 | -0.10434 |
| #DIV/0!      | ?        | #DIV/0!  |
| -0.369573467 | 0.91536  | 0.13972  |
| -0.594076957 | 0.981787 | -0.03388 |
| -0.549015804 | 0.989225 | -0.01664 |
| 2.187627003  | 0.934874 | 0.41504  |
| 0.780990218  | 0.970583 | 0.09818  |
| -0.485426827 | 1        | 0        |
| -0.277337944 | 0.879734 | 0.17638  |
| 1.797956224  | 0.942319 | 0.25023  |
| -0.021547781 | 0.894218 | 0.19265  |
| 0.436977669  | 0.864227 | 0.31737  |
| 0.21284099   | 0.962157 | 0.07586  |
| 0.244733589  | 0.881716 | 0.27761  |
| -0.151630318 | 0.872359 | 0.21966  |
| -0.305659052 | 0.815613 | 0.28525  |
| -0.370140961 | 0.991496 | -0.01249 |
| -0.47046838  | 0.920376 | -0.15331 |
| -0.240421837 | 0.90796  | 0.13731  |
| -0.594851128 | 0.768324 | 0.11185  |
| -0.713490378 | 0.987606 | 0.00964  |
| -0.658545937 | 0.911853 | -0.13754 |
| -0.381731413 | 0.895083 | 0.15338  |
| -0.360299211 | 0.999218 | 0.00144  |
| -0.263404828 | 0.850494 | 0.2746   |
| -0.454838507 | 0.935071 | -0.13089 |
| -0.416373947 | 0.972864 | -0.05202 |
| -0.63153035  | 0.867436 | -0.26146 |
| -0.301327208 | 0.97152  | 0.03833  |
| -0.918665166 | 0.655857 | -0.26659 |
| -0.310872906 | 0.760556 | 0.24816  |
| -0.518768284 | 0.889036 | -0.22661 |
| -0.692433047 | 0.821917 | -0.24348 |
| -0.272050874 | 0.975773 | -0.0514  |
| 0.106915204  | 0.862089 | -0.27417 |
| -0.14455602  | 0.955054 | -0.09625 |
| -0.672296167 | 0.987835 | -0.02292 |
| 0.032121614  | 0.987968 | 0.02563  |

|              |          |          |
|--------------|----------|----------|
| -0.639633175 | 0.858343 | -0.28147 |
| -0.704397732 | 0.95831  | -0.0556  |
| -0.489775781 | 0.985571 | -0.0179  |
| -1.662965013 | 0.765887 | -0.44057 |
| 0.517353102  | 0.739628 | 0.74327  |
| -0.672877947 | 0.915571 | -0.18481 |
| -0.170357011 | 0.989723 | -0.02088 |
| -0.439327278 | 0.982977 | -0.02577 |
| -0.405638801 | 0.97388  | -0.05142 |
| 0.080452925  | 0.875093 | -0.33988 |
| -0.358289082 | 0.936695 | -0.14654 |
| 0.732831339  | 0.961074 | 0.12479  |
| 0.188245646  | 0.971265 | -0.07819 |
| -0.243370052 | 0.897345 | 0.17023  |
| -0.463218421 | 0.944684 | 0.06939  |
| -0.47053628  | 0.849115 | -0.24648 |
| -0.891262468 | 0.59084  | -0.92584 |
| -1.634880375 | 0.747139 | -0.4682  |
| -0.353193594 | 0.969154 | 0.04518  |
| -0.801467446 | 0.855893 | -0.32928 |
| 0.039048402  | 0.952965 | 0.11293  |
| -0.134036547 | 0.738401 | 0.34046  |
| 0.203533394  | 0.420134 | 1        |
| -0.57664495  | 0.988331 | -0.0243  |
| 0.185092596  | 0.890765 | -0.23858 |
| -0.381895798 | 0.922343 | 0.13461  |
| 0.184611014  | 0.915115 | 0.17845  |
| -1.975943027 | 0.74227  | 0.41234  |
| -0.376375879 | 0.899487 | -0.21139 |
| -0.605632351 | 0.942958 | -0.11779 |
| -0.07012354  | 0.945278 | 0.10938  |
| -0.339645089 | 0.922135 | 0.14147  |
| 0.019159578  | 0.999109 | -0.00193 |
| -0.021404339 | 0.866492 | 0.23069  |
| -0.381731413 | 0.945839 | -0.1247  |
| -0.382407726 | 0.946959 | -0.09967 |
| -0.64656475  | 0.850279 | -0.27328 |
| -0.420207059 | 0.950881 | -0.09556 |
| 0.517058436  | 0.93571  | -0.14374 |
| -0.827163403 | 0.831216 | -0.32193 |
| -0.022979905 | 0.993639 | 0.01396  |
| -0.529253068 | 0.877031 | -0.1749  |
| -0.307635621 | 0.919286 | 0.12032  |
| -0.507672065 | 0.991295 | -0.0155  |
| 0.083219111  | 0.961089 | 0.07215  |
| -0.465348677 | 0.973787 | -0.04218 |
| -0.371415019 | 0.943434 | 0.07839  |
| -0.333972131 | 0.948633 | -0.11035 |
| -0.679165647 | 0.997932 | -0.00348 |
| -0.4738595   | 0.822574 | -0.36848 |
| -0.321201113 | 0.951037 | -0.08486 |
| -0.373052848 | 0.885978 | 0.16621  |
| -0.523233511 | 0.851484 | -0.35247 |
| -0.580331052 | 0.979429 | -0.0376  |
| -0.645335119 | 0.637771 | -0.72128 |
| -1.659849712 | 0.782939 | 0.45518  |

|              |          |          |
|--------------|----------|----------|
| -0.504623778 | 0.951484 | 0.09157  |
| #NUM!        | 0.308068 | #NUM!    |
| -0.513155359 | 0.915095 | 0.11873  |
| #DIV/0!      | ?        | #DIV/0!  |
| -0.660149997 | 0.633738 | 0.35315  |
| -0.449793081 | 0.887137 | -0.2006  |
| -0.285777344 | 0.963304 | 0.04955  |
| -0.357260648 | 0.946549 | -0.10687 |
| -0.338616023 | 0.982414 | 0.02817  |
| -0.560424164 | 0.996165 | -0.00617 |
| -0.351010735 | 0.962513 | 0.06767  |
| -0.391432605 | 0.942777 | -0.10143 |
| -0.724862528 | 0.969167 | 0.04342  |
| -0.568705729 | 0.97954  | -0.04046 |
| -0.527024324 | 0.917197 | -0.1522  |
| -0.012117195 | 0.844543 | 0.24971  |
| -0.374057118 | 0.755285 | 0.25864  |
| -1.382469637 | 0.727117 | 0.51062  |
| -0.217210653 | 0.92921  | -0.16317 |
| -0.382227766 | 0.885831 | 0.14447  |
| -0.809964287 | 0.872285 | 0.2496   |
| -0.138827705 | 0.89466  | -0.26039 |
| -0.920038136 | 0.88763  | -0.15423 |
| -0.275431432 | 0.874542 | 0.18782  |
| -0.296019924 | 0.933403 | -0.10664 |
| -0.520089698 | 0.941742 | 0.08751  |
| -0.596383199 | 0.880313 | -0.21843 |
| -0.48329456  | 0.964148 | 0.0654   |
| -0.404749329 | 0.983928 | -0.02799 |
| -0.076350886 | 0.963672 | -0.07635 |
| -0.523570957 | 0.990463 | 0.01176  |
| -0.141820239 | 0.970106 | -0.06274 |
| 0.806499485  | 0.865065 | 0.36556  |
| -0.9510904   | 0.951973 | -0.10309 |
| #NUM!        | 1        | 0        |
| 0.27502363   | 0.955704 | 0.09511  |
| -1.089267338 | 0.629273 | -0.34924 |
| 0            | 0.651448 | 1        |
| -0.683123083 | 0.658137 | 0.36522  |
| -0.160288278 | 0.978311 | 0.0417   |
| #NUM!        | 0.438509 | -0.67807 |
| -0.476438044 | 0.814221 | -0.50815 |
| #DIV/0!      | ?        | #DIV/0!  |
| -0.485426827 | 0.843145 | 0.22827  |
| -0.491419507 | 0.866525 | 0.23484  |
| -0.277831408 | 0.922799 | -0.18845 |
| -1.330083282 | 0.739873 | -0.56563 |
| -0.3272327   | 0.950943 | -0.11133 |
| -0.195597609 | 0.996301 | 0.00435  |
| -0.215439661 | 0.911889 | 0.17688  |
| -0.735356353 | 0.593512 | 0.6837   |
| -2.18648011  | 0.979712 | -0.03331 |
| 0.115477217  | 0.583737 | 0.8413   |
| 0.332983283  | 0.528787 | -1.52757 |
| 1.711202498  | 0.440704 | 1.38439  |
| -0.85741321  | 0.675873 | 0.38088  |

|              |          |          |
|--------------|----------|----------|
| 0.133266531  | 0.96141  | -0.08709 |
| -0.443504155 | 0.467337 | -1.0507  |
| -1.1627295   | 0.874511 | -0.05889 |
| #DIV/0!      | ?        | #DIV/0!  |
| -0.138284546 | 0.978902 | -0.03401 |
| 0            | 0.393741 | 2.58496  |
| -1.131244533 | 0.693977 | -0.71621 |
| -1           | 0.433134 | -2.58496 |
| -0.192645078 | 0.724378 | 0.45943  |
| 0.762549204  | 0.509956 | -2.5621  |
| -0.363872904 | 0.912507 | -0.17568 |
| #NUM!        | 0.034897 | 2        |
| 0.608809243  | 0.860542 | -0.41504 |
| -0.337532611 | 0.90147  | -0.17887 |
| -0.200844641 | 0.897235 | 0.15161  |
| -0.229192882 | 0.968375 | 0.06095  |
| 0.901390493  | 0.696414 | 0.83179  |
| 2.401468222  | 0.497718 | 2.22323  |
| 0.64448598   | 0.731309 | 0.67991  |
| #NUM!        | 0.462019 | -1.80735 |
| -0.604193591 | 0.985071 | -0.01691 |
| -0.88582898  | 0.669438 | -0.8548  |
| -2.584962501 | 0.495025 | -0.58496 |
| -0.623757472 | 0.868456 | 0.17298  |
| 0.032421478  | 0.916758 | 0.15528  |
| -0.821578973 | 0.726249 | -0.62224 |
| -0.53287399  | 0.424021 | 0.46713  |
| 0.695145418  | 0.785138 | 0.49033  |
| -2.235429944 | 0.71517  | -0.4524  |
| -1.03249102  | 0.743268 | -0.35951 |
| -0.497499659 | 0.677691 | -0.83007 |
| -0.167882525 | 0.9031   | 0.16053  |
| -0.884153171 | 0.657092 | -0.843   |
| -0.439912168 | 0.958976 | 0.07215  |
| -0.43405937  | 0.541699 | 0.46224  |
| -0.153994814 | 0.982018 | 0.03135  |
| 0.043906196  | 0.982361 | -0.03637 |
| 0.78764598   | 0.830837 | 0.35532  |
| 0.158831422  | 0.993614 | 0.01384  |
| -0.341036918 | 0.867038 | -0.24793 |
| -0.348940846 | 0.914081 | 0.12676  |
| -0.512622266 | 0.998737 | 0.00195  |
| -0.191938625 | 0.921159 | -0.13615 |
| -0.374859889 | 0.905989 | -0.1461  |
| -0.474399619 | 0.961764 | -0.07254 |
| -0.719244406 | 0.865786 | 0.14222  |
| -0.385493156 | 0.874044 | 0.15256  |
| -0.419917465 | 0.889167 | 0.13326  |
| -0.086788445 | 0.847735 | 0.22551  |
| 0.479609501  | 0.843773 | 0.2932   |
| -0.679811757 | 0.670081 | -0.34305 |
| -0.340017345 | 0.958239 | 0.06238  |
| -0.312759062 | 0.901691 | -0.19036 |
| #NUM!        | ?        | -18.3092 |
| -0.490173172 | 0.906342 | 0.13733  |
| -0.252233874 | 0.969841 | 0.05722  |

|              |           |          |
|--------------|-----------|----------|
| -0.376912675 | 0.987567  | -0.02221 |
| -1.264075284 | 0.715977  | -0.56627 |
| -0.622976709 | 0.959838  | 0.06042  |
| -0.122774478 | 0.929497  | -0.14752 |
| -0.619607471 | 0.989542  | 0.01638  |
| -0.485017029 | 0.788057  | -0.52181 |
| -0.184092667 | 0.894245  | -0.22192 |
| -0.728128231 | 0.895956  | -0.21209 |
| -0.956116065 | 0.887398  | -0.25494 |
| -0.694288909 | 0.97635   | 0.04591  |
| 0.191859653  | 0.997252  | 0.00627  |
| 1            | 0.710482  | 1        |
| 0.135263661  | 0.98904   | 0.02634  |
| -2.116554257 | 0.953092  | -0.08766 |
| -1.329307625 | 0.660134  | -0.46496 |
| -0.382912971 | 0.92922   | -0.1436  |
| -2.64385619  | 0.655045  | -0.73697 |
| 0.286304185  | 0.909854  | 0.16601  |
| 0            | 0.821261  | 0.32193  |
| -0.210094049 | 0.967509  | 0.05294  |
| 0.059084549  | 0.899153  | -0.26495 |
| -0.084064265 | 0.988698  | -0.02748 |
| -0.44527333  | 0.924752  | 0.10698  |
| -0.441489056 | 0.989039  | 0.02214  |
| -0.397878122 | 0.960214  | -0.076   |
| -0.43055598  | 0.900558  | 0.16976  |
| -2.702016721 | 0.354627  | -2.41189 |
| -0.495653934 | 0.852664  | -0.31402 |
| -0.155958822 | 0.871519  | -0.30018 |
| -0.978626349 | 0.852295  | -0.23954 |
| -0.852154532 | 0.638927  | 0.62253  |
| -0.021595921 | 0.899526  | -0.233   |
| -0.289506617 | 0.827093  | 0.34792  |
| -0.428251013 | 0.998214  | 0.00378  |
| -0.701970884 | 0.893385  | -0.22992 |
| -0.333992686 | 0.903065  | 0.12578  |
| -0.593786351 | 0.918511  | -0.13516 |
| #NUM!        | 0.495025  | -1.58496 |
| -0.002537723 | 0.497041  | 0.58242  |
| 1.736965594  | 0.848767  | 0.64534  |
| #DIV/0!      | 1         | #DIV/0!  |
| -1.396859804 | 0.749647  | -0.42581 |
| -1.797820854 | 0.910316  | -0.10626 |
| -2.225917833 | 0.0879314 | -1.96529 |
| 0.166009951  | 0.923088  | 0.16601  |
| -0.42510695  | 0.658027  | 0.54929  |
| -2           | 0.791627  | -0.41504 |
| 0.205303674  | 0.762863  | 0.40234  |
| -0.296981738 | 0.941987  | -0.09714 |
| -0.218622764 | 0.924479  | -0.16577 |
| -0.493206675 | 0.973217  | 0.05129  |
| -0.539568079 | 0.960723  | -0.06959 |
| -0.620535842 | 0.822976  | -0.32041 |
| -1.775293713 | 1         | 0        |
| -0.452924585 | 0.931185  | -0.13825 |
| -0.678071905 | 0.698091  | 0.45943  |

|              |          |          |
|--------------|----------|----------|
| -0.20615223  | 0.948772 | -0.11929 |
| -1.33872243  | 0.614869 | -0.77509 |
| -0.386468347 | 0.987788 | 0.02857  |
| -0.351074441 | 0.900937 | 0.21231  |
| -0.174229805 | 0.974859 | -0.05902 |
| -0.697840601 | 0.992662 | 0.01556  |
| -0.603160159 | 0.830707 | -0.37081 |
| -0.430157997 | 0.943417 | -0.12488 |
| -0.039046654 | 0.931048 | -0.15745 |
| -0.586773794 | 0.815654 | 0.17695  |
| -0.255635643 | 0.902169 | 0.19381  |
| -1.331488324 | 0.977011 | -0.02024 |
| -0.260698057 | 0.941538 | -0.07191 |
| -0.235812937 | 0.919006 | 0.11489  |
| 0.154148903  | 0.948881 | -0.1354  |
| 0.166074439  | 0.871248 | -0.35279 |
| 1.023860955  | 0.913061 | -0.34895 |
| -0.308708965 | 0.894056 | 0.15738  |
| -1.874469118 | 0.768413 | -0.45943 |
| -0.990445693 | 0.875641 | -0.22519 |
| -0.604143914 | 0.637172 | 0.67694  |
| -1.085210826 | 0.936804 | -0.12459 |
| -0.576987919 | 0.900159 | 0.18786  |
| -0.796466606 | 0.953386 | 0.06711  |
| -0.882098406 | 0.821598 | -0.29052 |
| -2.018378529 | 0.944526 | 0.10879  |
| -0.788495895 | 0.604654 | -1.24793 |
| -1.033105515 | 0.869462 | 0.27109  |
| 0.175999516  | 0.996831 | -0.00686 |
| -0.388325913 | 0.906839 | -0.21895 |
| -0.194344424 | 0.890913 | 0.22429  |
| -1.311500287 | 0.947549 | 0.10841  |
| -0.441497034 | 0.841357 | -0.38302 |
| -0.997666815 | 0.79474  | -0.30199 |
| #DIV/0!      | ?        | #DIV/0!  |
| -0.69080133  | 0.975752 | -0.02797 |
| -0.276517635 | 0.87798  | 0.10356  |
| -0.375509135 | 0.905623 | 0.18653  |
| 0            | 0.391002 | 1.58496  |
| -0.329920886 | 0.210905 | 1.16682  |
| -1.078002512 | 0.402268 | -2.926   |
| 1.115477217  | 0.595204 | 0.9386   |
| -0.709939431 | 0.805213 | -0.36821 |
| -1.878745357 | 0.323758 | -0.56983 |
| -0.152935596 | 0.998555 | 0.00333  |
| -1.951905712 | 0.691708 | -0.63472 |
| #DIV/0!      | ?        | #DIV/0!  |
| -0.624117573 | 0.831721 | 0.1049   |
| -0.293046975 | 0.943637 | 0.07619  |
| 0.018615678  | 0.903668 | 0.22507  |
| -0.44666365  | 0.959315 | 0.06486  |
| -0.41373484  | 0.876167 | -0.2843  |
| -0.538584147 | 0.917624 | -0.17518 |
| -0.40500232  | 0.991782 | 0.01277  |
| -0.412611027 | 0.949675 | -0.07894 |
| -0.465612495 | 0.896797 | -0.1103  |



|              |          |          |
|--------------|----------|----------|
| -0.377488798 | 0.998998 | -0.00157 |
| -0.329359165 | 0.937733 | 0.07776  |
| -0.328188804 | 0.894957 | 0.15832  |
| -0.275355955 | 0.948071 | 0.09408  |
| -0.145262947 | 0.897787 | 0.17177  |
| -0.270845922 | 0.979524 | -0.03346 |
| 1            | 0.806588 | -1       |
| -0.3533368   | 0.755862 | 0.47458  |
| -0.584962501 | 1        | 0        |
| 0.741611302  | 0.744366 | 0.58981  |
| -0.516917113 | 0.705518 | 0.31865  |
| -0.459560552 | 0.994936 | 0.00815  |
| -0.832463028 | 0.83077  | 0.29712  |
| -0.494764692 | 0.905643 | -0.19931 |
| -0.077269102 | 0.866621 | -0.31936 |
| -1.238412438 | 0.757585 | -0.44589 |
| -0.305285948 | 0.978935 | 0.03357  |
| -0.756370013 | 0.870327 | -0.24271 |
| 1.338858491  | 0.622202 | 1.08158  |
| -0.361013421 | 0.97254  | 0.04377  |
| 0.375830323  | 0.859007 | 0.34103  |
| 0.038131006  | 0.915024 | 0.19359  |
| -0.191965179 | 0.592349 | 0.80762  |
| -0.282498029 | 0.984598 | -0.03245 |
| -0.288800567 | 0.96282  | 0.06921  |
| -0.603289071 | 0.996731 | -0.00599 |
| -1.087462841 | 0.641229 | 0.30485  |
| -0.60955896  | 0.827191 | -0.39782 |
| -0.400176675 | 0.977616 | 0.03312  |
| -0.656464643 | 0.993599 | -0.00987 |
| 0.081173004  | 0.943856 | -0.11085 |
| -0.09600182  | 0.905497 | 0.18974  |
| -0.388328139 | 0.916998 | -0.16423 |
| -1.566125825 | 0.824849 | 0.37245  |
| -1.607682577 | 0.952904 | 0.0917   |
| -0.208185929 | 0.967521 | 0.06178  |
| -0.507808374 | 0.756021 | 0.191    |
| -1.464520495 | 0.856478 | 0.28109  |
| -0.386455061 | 0.980934 | -0.03611 |
| -0.361867382 | 0.974369 | -0.04385 |
| -0.804257014 | 0.786617 | -0.21137 |
| -0.350186355 | 0.867789 | -0.30339 |
| -0.743027347 | 0.777913 | -0.4549  |
| -2.051838932 | 0.373081 | -1.28011 |
| -1.791413378 | 0.382421 | -2.49185 |
| 0.488499661  | 0.639374 | 0.71527  |
| -0.736965594 | 1        | 0        |
| -0.862496476 | 0.673826 | -0.80408 |
| 0.888251642  | 0.891081 | 0.26154  |
| -5           | 0.229086 | #NUM!    |
| 0.338524605  | 0.840331 | -0.43505 |
| -1.289506617 | 0.861787 | 0.22069  |
| -0.03339721  | 0.829327 | 0.34225  |
| -2           | 0.522315 | 1        |
| -0.418276318 | 0.597935 | -1.41828 |
| 2.398814782  | 0.959065 | -0.40854 |

|              |           |          |
|--------------|-----------|----------|
| 0.459431619  | 0.784909  | 0.64386  |
| 2.048094288  | 0.845561  | 0.77557  |
| -1.807354922 | 1         | 0        |
| -0.613564972 | 0.620366  | -0.33196 |
| -0.231396983 | 0.981018  | -0.04341 |
| 0.514573173  | 0.35031   | 1.36257  |
| #DIV/0!      | ?         | #DIV/0!  |
| #DIV/0!      | ?         | #DIV/0!  |
| #DIV/0!      | 0.308068  | #DIV/0!  |
| #DIV/0!      | ?         | #DIV/0!  |
| #DIV/0!      | 0.308068  | #DIV/0!  |
| -0.817495918 | 0.87136   | -0.2086  |
| 0.169925001  | 0.935472  | -0.19265 |
| #NUM!        | 0.308068  | #NUM!    |
| -2.321928095 | 0.0227138 | #NUM!    |
| -2.586782936 | 0.142342  | -1.6539  |
| 0.246573458  | 0.487549  | #NUM!    |
| -53.51815729 | 0.472917  | -1.72866 |
| #DIV/0!      | ?         | #DIV/0!  |
| #DIV/0!      | ?         | #DIV/0!  |
| -0.136697023 | 0.916544  | -0.17565 |
| -0.554377444 | 0.978474  | 0.02544  |
| -0.435145073 | 0.95385   | 0.05028  |
| -0.20031672  | 0.992365  | 0.0141   |
| -0.153552032 | 0.850024  | 0.19573  |
| -0.264316659 | 0.997536  | 0.004    |
| -0.49961334  | 0.819502  | -0.37042 |
| -0.394042516 | 0.996866  | -0.00691 |
| -0.661782364 | 0.838388  | -0.27598 |
| -0.055438986 | 0.935538  | -0.14123 |
| -0.805696334 | 0.910699  | -0.18131 |
| -2.096861539 | 0.710791  | -0.59436 |
| -0.253718888 | 0.949376  | -0.10398 |
| 0.473133899  | 0.969125  | -0.07358 |
| -0.766125329 | 0.687094  | -0.51204 |
| 0.426162663  | 0.870746  | 0.24323  |
| 0.121779918  | 0.984484  | 0.03611  |
| -1.118228754 | 0.86428   | 0.27479  |
| -1.127395907 | 0.87454   | -0.23377 |
| -0.049753035 | 0.958771  | 0.09464  |
| -0.425944631 | 0.779468  | -0.42845 |
| -0.50576067  | 0.732434  | 0.52625  |
| -2.115477217 | 0.656241  | -0.53051 |
| -0.566583971 | 0.963476  | 0.06037  |
| -1.169925001 | 0.770925  | -0.58496 |
| -0.673018677 | 1         | 0        |
| -0.921840937 | 0.82852   | -0.39436 |
| -0.276185773 | 0.979788  | -0.04251 |
| -2.766087702 | 0.976555  | 0.03333  |
| -0.348596376 | 0.995383  | -0.00519 |
| -0.195893566 | 0.920401  | -0.19003 |
| -0.33481277  | 0.955742  | 0.05624  |
| -0.525715785 | 0.987833  | -0.02269 |
| -0.906102078 | 0.99398   | 0.00805  |
| -0.525742083 | 0.973808  | -0.0438  |
| -0.772278075 | 0.970215  | -0.03659 |

|              |          |          |
|--------------|----------|----------|
| -0.07281199  | 0.808447 | -0.41611 |
| -2.459431619 | 0.822295 | 0.34792  |
| -0.821820284 | 0.797956 | -0.44469 |
| -0.673771768 | 0.96879  | 0.05002  |
| -0.916366821 | 0.835306 | -0.36836 |
| 0.03548555   | 0.890416 | 0.17377  |
| 1.046223892  | 0.499745 | 1.34329  |
| 0.117352207  | 0.497736 | 1.00978  |
| #DIV/0!      | 1        | #DIV/0!  |
| 1.677156405  | 0.344945 | 3.08746  |
| 1.064130337  | 0.600863 | 1.12553  |
| -0.291737302 | 0.873559 | 0.18195  |
| -0.309946615 | 0.964704 | 0.06728  |
| -0.541345965 | 0.988829 | 0.02182  |
| -0.589435977 | 0.836725 | 0.12882  |
| -2.169925001 | 0.791317 | -0.31487 |
| -0.038844136 | 0.866993 | 0.26592  |
| -0.51552011  | 0.898927 | 0.11348  |
| -0.553669274 | 0.937989 | 0.08188  |
| -0.753979107 | 0.8293   | -0.16477 |
| 1.759408644  | 0.648272 | 0.65263  |
| 0.129017058  | 0.785585 | 0.37185  |
| -0.340581516 | 0.953563 | -0.09995 |
| -0.337412054 | 0.934657 | 0.11559  |
| -1.387187253 | 0.992651 | -0.00689 |
| -5.190622495 | 0.033846 | -2.99895 |
| -2.584962501 | 0.393741 | -2.58496 |
| -0.655821838 | 0.92589  | 0.0822   |
| -0.382666194 | 0.93757  | 0.09897  |
| -0.246758866 | 0.989729 | 0.02089  |
| -0.3483412   | 0.97084  | -0.06316 |
| -0.303265694 | 0.952591 | -0.09432 |
| 1.222392421  | 0.855216 | 0.41504  |
| -1.172639386 | 0.778636 | -0.31382 |
| -1.71666818  | 0.920099 | 0.04762  |
| -0.277962647 | 0.910212 | -0.17657 |
| -0.336457678 | 0.947034 | -0.08254 |
| #NUM!        | 0.495025 | 1.58496  |
| 0.584962501  | 0.764931 | -1       |
| -0.459504171 | 0.911138 | -0.19472 |
| 0.13680942   | 0.99273  | -0.01381 |
| 0            | 0.753462 | 0.67807  |
| -0.881355504 | 0.797176 | -0.29639 |
| -0.489805268 | 0.538244 | 1.08489  |
| 0.726981506  | 0.995445 | -0.01249 |
| -0.333348661 | 0.947875 | 0.08923  |
| -0.748799689 | 0.763745 | 0.13694  |
| 0.436099115  | 0.360377 | 1.04182  |
| -1.21191909  | 0.890722 | -0.20282 |
| -1.42869738  | 0.928445 | 0.08025  |
| -0.535718982 | 0.974358 | 0.04601  |
| -0.383549661 | 0.944672 | -0.09981 |
| -3           | 0.445516 | -1.85316 |
| -0.998794067 | 0.902964 | -0.17213 |
| 1.310340121  | 0.671083 | 0.78241  |
| -3.925999419 | 0.145548 | -2.7885  |

|              |           |          |
|--------------|-----------|----------|
| -0.803195532 | 0.923815  | 0.09059  |
| -1.222392421 | 0.878078  | 0.22827  |
| -0.479442172 | 0.96556   | -0.06421 |
| 0.111484357  | 0.96036   | -0.07919 |
| -1.563549194 | 0.958481  | -0.0634  |
| -1.405759972 | 0.643352  | -0.72484 |
| 0.106915204  | 0.31424   | -1.37851 |
| -0.528255401 | 0.982645  | 0.02408  |
| -0.672958982 | 0.88582   | -0.22429 |
| -0.43008941  | 0.920388  | 0.07431  |
| -0.191409365 | 0.963192  | 0.05459  |
| -0.461046335 | 0.948534  | -0.10741 |
| -0.54194832  | 0.96714   | 0.04906  |
| -0.078002512 | 0.767125  | -0.54749 |
| -0.568186788 | 0.986394  | -0.01697 |
| -1.443051875 | 0.261513  | -3.34289 |
| -0.736965594 | 0.876816  | -0.20645 |
| -0.496483811 | 0.996214  | -0.00574 |
| -0.364063244 | 0.962157  | -0.07395 |
| -0.556031499 | 0.897736  | 0.21667  |
| -0.531013553 | 0.945495  | 0.08516  |
| -0.433500418 | 0.921843  | -0.16296 |
| 0.016098081  | 0.998942  | -0.00194 |
| 0.450994947  | 0.934354  | -0.18965 |
| -0.874657275 | 0.987197  | -0.02505 |
| -1.485426827 | 0.881585  | -0.22239 |
| -0.936843464 | 0.8863    | -0.21609 |
| #NUM!        | 0.0405193 | -2.32193 |
| -0.367757388 | 0.997047  | 0.00555  |
| -0.357793547 | 0.981213  | 0.03437  |
| -0.324741088 | 0.981298  | 0.0391   |
| #DIV/0!      | ?         | #DIV/0!  |
| #DIV/0!      | ?         | #DIV/0!  |
| #DIV/0!      | ?         | #DIV/0!  |
| -1.584962501 | 1         | 0        |
| #DIV/0!      | ?         | #DIV/0!  |
| 0.3016557    | 0.933003  | 0.1587   |
| #NUM!        | 0.822295  | 0.41504  |
| #DIV/0!      | ?         | #DIV/0!  |
| -0.893084796 | 0.368766  | 0.62149  |
| #DIV/0!      | 0.308068  | #DIV/0!  |
| #DIV/0!      | ?         | #DIV/0!  |
| #DIV/0!      | 1         | #DIV/0!  |
| #DIV/0!      | ?         | #DIV/0!  |
| #DIV/0!      | 0.622002  | #DIV/0!  |
| #DIV/0!      | ?         | #DIV/0!  |
| #DIV/0!      | ?         | #DIV/0!  |
| #DIV/0!      | ?         | #DIV/0!  |
| #DIV/0!      | ?         | #DIV/0!  |
| #DIV/0!      | 0.308068  | #DIV/0!  |
| #DIV/0!      | ?         | #DIV/0!  |
| #DIV/0!      | ?         | #DIV/0!  |
| #DIV/0!      | ?         | #DIV/0!  |
| #DIV/0!      | ?         | #DIV/0!  |
| 0            | 0.450185  | #NUM!    |
| #DIV/0!      | ?         | #DIV/0!  |
| #NUM!        | 1         | 0        |

|              |          |          |
|--------------|----------|----------|
| -0.807354922 | 0.407544 | -1.22239 |
| #DIV/0!      | 1        | #DIV/0!  |
| #DIV/0!      | ?        | #DIV/0!  |
| #DIV/0!      | ?        | #DIV/0!  |
| 8.376102785  | 0.308068 | 25.5292  |
| #DIV/0!      | ?        | #DIV/0!  |
| 0.206450877  | 0.789583 | 0.54749  |
| #DIV/0!      | ?        | #DIV/0!  |
| #DIV/0!      | ?        | #DIV/0!  |
| #NUM!        | 0.308068 | #NUM!    |
| #DIV/0!      | ?        | #DIV/0!  |
| #DIV/0!      | ?        | #DIV/0!  |
| #DIV/0!      | 0.308068 | #DIV/0!  |
| #DIV/0!      | ?        | #DIV/0!  |
| #NUM!        | 0.308068 | #NUM!    |
| #NUM!        | 1        | 0        |
| #DIV/0!      | ?        | #DIV/0!  |
| -0.125530882 | 0.326833 | 1.62449  |
| #NUM!        | 0.308068 | #NUM!    |
| 0.584962501  | 0.680109 | 1        |
| #DIV/0!      | ?        | #DIV/0!  |
| #DIV/0!      | 1        | #DIV/0!  |
| #DIV/0!      | ?        | #DIV/0!  |
| #DIV/0!      | ?        | #DIV/0!  |
| #NUM!        | 0.308068 | #NUM!    |
| #DIV/0!      | 0.308068 | #DIV/0!  |
| #DIV/0!      | ?        | #DIV/0!  |
| #DIV/0!      | 1        | #DIV/0!  |
| -0.152003093 | 0.474021 | 0.26303  |
| #DIV/0!      | ?        | #DIV/0!  |
| #DIV/0!      | ?        | #DIV/0!  |
| #NUM!        | 0.308068 | #NUM!    |
| #DIV/0!      | ?        | #DIV/0!  |
| #DIV/0!      | ?        | #DIV/0!  |
| -1.222392421 | 0.613399 | -0.48543 |
| -1.321928095 | 0.888898 | 0.26303  |
| -13.7585859  | ?        | -19.9791 |
| #DIV/0!      | ?        | #DIV/0!  |
| #DIV/0!      | ?        | #DIV/0!  |
| #DIV/0!      | ?        | #DIV/0!  |
| -1           | 0.353387 | #NUM!    |
| #DIV/0!      | ?        | #DIV/0!  |
| #DIV/0!      | ?        | #DIV/0!  |
| #DIV/0!      | ?        | #DIV/0!  |
| #DIV/0!      | ?        | #DIV/0!  |
| #DIV/0!      | ?        | #DIV/0!  |
| #DIV/0!      | ?        | #DIV/0!  |
| #NUM!        | 0.308068 | #NUM!    |
| #DIV/0!      | 0.329316 | #DIV/0!  |
| #DIV/0!      | 1        | #DIV/0!  |
| #DIV/0!      | ?        | #DIV/0!  |
| 1.087462841  | 0.868508 | 0.45943  |
| #NUM!        | 0.622002 | -1       |
| #DIV/0!      | ?        | #DIV/0!  |
| #DIV/0!      | ?        | #DIV/0!  |
| #NUM!        | 0.308068 | #NUM!    |
| #DIV/0!      | ?        | #DIV/0!  |

|              |           |          |
|--------------|-----------|----------|
| #NUM!        | 1         | 0        |
| 0.514573173  | 0.538083  | 1        |
| -1.118644496 | 0.730301  | 0.39593  |
| #DIV/0!      | 0.308068  | #DIV/0!  |
| #DIV/0!      | ?         | #DIV/0!  |
| #DIV/0!      | ?         | #DIV/0!  |
| #DIV/0!      | ?         | #DIV/0!  |
| #DIV/0!      | ?         | #DIV/0!  |
| 0            | 0.903291  | 0.26303  |
| #DIV/0!      | 0.308068  | #DIV/0!  |
| #DIV/0!      | ?         | #DIV/0!  |
| #DIV/0!      | ?         | #DIV/0!  |
| #NUM!        | 0.308068  | #NUM!    |
| #NUM!        | 1         | 0        |
| 1            | 0.622002  | #NUM!    |
| 0.584962501  | 0.680109  | 1        |
| #DIV/0!      | 0.0227138 | #DIV/0!  |
| #DIV/0!      | 1         | #DIV/0!  |
| #NUM!        | 0.450185  | 1        |
| #DIV/0!      | 0.308068  | #DIV/0!  |
| -1.700439718 | 0.810437  | -0.37851 |
| #DIV/0!      | ?         | #DIV/0!  |
| #DIV/0!      | ?         | #DIV/0!  |
| 0.584962501  | 1         | 0        |
| 0            | 0.564576  | 0.77761  |
| #DIV/0!      | ?         | #DIV/0!  |
| #NUM!        | 0.495025  | 1.58496  |
| #DIV/0!      | ?         | #DIV/0!  |
| #DIV/0!      | ?         | #DIV/0!  |
| #NUM!        | 0.308068  | #NUM!    |
| #DIV/0!      | 0.450185  | #DIV/0!  |
| #DIV/0!      | ?         | #DIV/0!  |
| #DIV/0!      | 0.308068  | #DIV/0!  |
| #DIV/0!      | ?         | #DIV/0!  |
| #NUM!        | 0.308068  | #NUM!    |
| -1.584962501 | 1         | 0        |
| #DIV/0!      | ?         | #DIV/0!  |
| #DIV/0!      | ?         | #DIV/0!  |
| #NUM!        | 0.308068  | #NUM!    |
| 1            | 0.794363  | 0.58496  |
| -1.24961389  | 0.783235  | -0.53201 |
| #DIV/0!      | ?         | #DIV/0!  |
| #DIV/0!      | ?         | #DIV/0!  |
| -50.80904021 | 0.308068  | -50.809  |
| #DIV/0!      | 0.308068  | #DIV/0!  |
| #DIV/0!      | ?         | #DIV/0!  |
| #DIV/0!      | 0.308068  | #DIV/0!  |
| #NUM!        | 0.18169   | 0.73697  |
| -0.485426827 | 0.698091  | -0.80735 |
| #NUM!        | 0.308068  | #NUM!    |
| #DIV/0!      | ?         | #DIV/0!  |
| 0.847996907  | 0.196267  | 1.37851  |
| #DIV/0!      | 0.999993  | #DIV/0!  |
| #DIV/0!      | ?         | #DIV/0!  |
| #DIV/0!      | ?         | #DIV/0!  |
| #DIV/0!      | ?         | #DIV/0!  |

|              |          |          |
|--------------|----------|----------|
| -1           | 0.6882   | 0.80735  |
| #DIV/0!      | ?        | #DIV/0!  |
| #DIV/0!      | ?        | #DIV/0!  |
| #DIV/0!      | 0.308068 | #DIV/0!  |
| #DIV/0!      | ?        | #DIV/0!  |
| #DIV/0!      | ?        | #DIV/0!  |
| #DIV/0!      | ?        | #DIV/0!  |
| #DIV/0!      | ?        | #DIV/0!  |
| #DIV/0!      | ?        | #DIV/0!  |
| #DIV/0!      | ?        | #DIV/0!  |
| -1.584962501 | 0.329316 | #NUM!    |
| #DIV/0!      | 0.308068 | #DIV/0!  |
| #DIV/0!      | 0.308068 | #DIV/0!  |
| -0.565597176 | 0.67447  | 0.49099  |
| #NUM!        | 0.622002 | 1        |
| 1.584962501  | 1        | 0        |
| #DIV/0!      | ?        | #DIV/0!  |
| -0.459431619 | 0.934627 | -0.1375  |
| #DIV/0!      | ?        | #DIV/0!  |
| 1            | 0.927134 | 0.26303  |
| -1.700439718 | 0.310977 | -7.11619 |
| #DIV/0!      | 0.308068 | #DIV/0!  |
| #DIV/0!      | ?        | #DIV/0!  |
| #DIV/0!      | ?        | #DIV/0!  |
| #NUM!        | 0.622002 | -1       |
| #DIV/0!      | ?        | #DIV/0!  |
| #DIV/0!      | ?        | #DIV/0!  |
| #DIV/0!      | 0.308068 | #DIV/0!  |
| #NUM!        | 0.308068 | #NUM!    |
| #DIV/0!      | ?        | #DIV/0!  |
| -1           | 0.866773 | 0.32193  |
| -0.281020151 | 0.989339 | 0.02531  |
| #DIV/0!      | ?        | #DIV/0!  |
| #DIV/0!      | ?        | #DIV/0!  |
| -0.780218792 | 0.739884 | -0.54889 |
| #DIV/0!      | ?        | #DIV/0!  |
| -0.014284226 | 0.968549 | -0.05801 |
| -0.019899557 | 0.952062 | -0.12374 |
| #DIV/0!      | ?        | #DIV/0!  |
| #DIV/0!      | ?        | #DIV/0!  |
| #DIV/0!      | ?        | #DIV/0!  |
| #DIV/0!      | ?        | #DIV/0!  |
| 0            | 0.450185 | #NUM!    |
| #DIV/0!      | ?        | #DIV/0!  |
| #NUM!        | 0.495025 | -1.58496 |
| #DIV/0!      | ?        | #DIV/0!  |
| #DIV/0!      | 1        | #DIV/0!  |
| #DIV/0!      | ?        | #DIV/0!  |
| #DIV/0!      | ?        | #DIV/0!  |
| #DIV/0!      | ?        | #DIV/0!  |
| #DIV/0!      | ?        | #DIV/0!  |
| #NUM!        | 0.308068 | #NUM!    |
| #DIV/0!      | ?        | #DIV/0!  |
| 0            | 1        | 0        |
| #DIV/0!      | 0.308068 | #DIV/0!  |
| #DIV/0!      | ?        | #DIV/0!  |

|              |          |          |
|--------------|----------|----------|
| #DIV/0!      | 0.308068 | #DIV/0!  |
| 0.362570079  | 1        | 0        |
| -1           | 0.308068 | -2       |
| #DIV/0!      | ?        | #DIV/0!  |
| #NUM!        | 0.308068 | #NUM!    |
| #DIV/0!      | ?        | #DIV/0!  |
| #NUM!        | 0.495025 | 1.58496  |
| #DIV/0!      | 0.450185 | #DIV/0!  |
| #DIV/0!      | ?        | #DIV/0!  |
| 0.192645078  | 0.816864 | -0.48543 |
| -0.584962501 | 0.807087 | -0.46297 |
| #NUM!        | 0.308068 | #NUM!    |
| 0            | 1        | 0        |
| 2            | 0.806588 | 1        |
| #DIV/0!      | ?        | #DIV/0!  |
| #DIV/0!      | ?        | #DIV/0!  |
| 0.584962501  | 0.764931 | 0.58496  |
| #DIV/0!      | ?        | #DIV/0!  |
| #DIV/0!      | ?        | #DIV/0!  |
| #DIV/0!      | ?        | #DIV/0!  |
| #DIV/0!      | ?        | #DIV/0!  |
| #DIV/0!      | ?        | #DIV/0!  |
| #DIV/0!      | ?        | #DIV/0!  |
| 0.584962501  | 0.764931 | -1       |
| -1.473931188 | 0.932847 | -0.152   |
| #DIV/0!      | 1        | #DIV/0!  |
| #DIV/0!      | 0.248582 | #DIV/0!  |
| #DIV/0!      | ?        | #DIV/0!  |
| #DIV/0!      | ?        | #DIV/0!  |
| #NUM!        | 1        | 0        |
| #DIV/0!      | ?        | #DIV/0!  |
| -2           | 0.450185 | -2       |
| #DIV/0!      | 0.353387 | #DIV/0!  |
| 0            | 0.450185 | #NUM!    |
| -1           | 0.353387 | #NUM!    |
| #DIV/0!      | ?        | #DIV/0!  |
| #DIV/0!      | ?        | #DIV/0!  |
| #NUM!        | 0.622002 | 1        |
| #DIV/0!      | ?        | #DIV/0!  |
| #DIV/0!      | ?        | #DIV/0!  |
| #DIV/0!      | 0.308068 | #DIV/0!  |
| 0.091630475  | 0.951723 | 0.11366  |
| #DIV/0!      | ?        | #DIV/0!  |
| #DIV/0!      | ?        | #DIV/0!  |
| #DIV/0!      | ?        | #DIV/0!  |
| 0            | 0.450185 | #NUM!    |
| 0            | 1        | 0        |
| #DIV/0!      | ?        | #DIV/0!  |
| -1           | 0.353387 | #NUM!    |
| -0.243084816 | 0.988875 | 0.01815  |
| #DIV/0!      | ?        | #DIV/0!  |
| #NUM!        | 1        | 0        |
| #NUM!        | 0.308068 | #NUM!    |
| 0.637429921  | 0.672262 | -0.848   |
| #DIV/0!      | ?        | #DIV/0!  |
| #DIV/0!      | 1        | #DIV/0!  |



|              |          |          |
|--------------|----------|----------|
| #DIV/0!      | ?        | #DIV/0!  |
| #DIV/0!      | ?        | #DIV/0!  |
| #DIV/0!      | ?        | #DIV/0!  |
| #DIV/0!      | ?        | #DIV/0!  |
| #DIV/0!      | 0.308068 | #DIV/0!  |
| #DIV/0!      | ?        | #DIV/0!  |
| 1.584962501  | 0.770719 | 0.73697  |
| #DIV/0!      | ?        | #DIV/0!  |
| #DIV/0!      | 0.308068 | #DIV/0!  |
| 1            | 0.622002 | #NUM!    |
| #DIV/0!      | ?        | #DIV/0!  |
| 0            | 0.236154 | 2.32193  |
| #DIV/0!      | 1        | #DIV/0!  |
| -1.502500341 | 0.451984 | -2.08746 |
| #DIV/0!      | ?        | #DIV/0!  |
| #DIV/0!      | ?        | #DIV/0!  |
| #DIV/0!      | ?        | #DIV/0!  |
| #DIV/0!      | 0.450185 | #DIV/0!  |
| -2           | 0.825659 | -0.41504 |
| #NUM!        | 0.495025 | -1.58496 |
| #DIV/0!      | ?        | #DIV/0!  |
| #DIV/0!      | 1        | #DIV/0!  |
| #NUM!        | 0.308068 | #NUM!    |
| #DIV/0!      | ?        | #DIV/0!  |
| #NUM!        | 0.308068 | #NUM!    |
| -0.584962501 | 0.637618 | 0.73697  |
| -1           | 0.353387 | #NUM!    |
| #DIV/0!      | ?        | #DIV/0!  |
| #NUM!        | 0.308068 | #NUM!    |
| #DIV/0!      | ?        | #DIV/0!  |
| #DIV/0!      | 1        | #DIV/0!  |
| #DIV/0!      | ?        | #DIV/0!  |
| #DIV/0!      | ?        | #DIV/0!  |
| #DIV/0!      | ?        | #DIV/0!  |
| -1.321928095 | 0.139326 | -2.32193 |
| #NUM!        | 0.622002 | 1        |
| #DIV/0!      | ?        | #DIV/0!  |
| #DIV/0!      | ?        | #DIV/0!  |
| #DIV/0!      | ?        | #DIV/0!  |
| #NUM!        | 0.308068 | #NUM!    |
| #DIV/0!      | ?        | #DIV/0!  |
| 1.584962501  | 1        | 0        |
| #DIV/0!      | 0.308068 | #DIV/0!  |
| 0            | 0.513713 | 1.58496  |
| #DIV/0!      | ?        | #DIV/0!  |
| 0.584962501  | 0.594273 | 1        |
| #DIV/0!      | ?        | #DIV/0!  |
| #DIV/0!      | ?        | #DIV/0!  |
| #DIV/0!      | ?        | #DIV/0!  |
| -0.956931278 | 0.896908 | -0.23704 |
| #DIV/0!      | ?        | #DIV/0!  |
| #DIV/0!      | 0.18169  | #DIV/0!  |
| #DIV/0!      | 0.622002 | #DIV/0!  |
| #DIV/0!      | ?        | #DIV/0!  |
| #NUM!        | 0.622002 | 1        |
| #DIV/0!      | ?        | #DIV/0!  |
| #DIV/0!      | ?        | #DIV/0!  |

|              |           |         |
|--------------|-----------|---------|
| #DIV/0!      | ?         | #DIV/0! |
| 0.034765418  | 0.733543  | 0.52509 |
| #DIV/0!      | ?         | #DIV/0! |
| #DIV/0!      | ?         | #DIV/0! |
| 0.415037499  | 0.751907  | 0.73697 |
| #DIV/0!      | 0.308068  | #DIV/0! |
| #DIV/0!      | ?         | #DIV/0! |
| #DIV/0!      | ?         | #DIV/0! |
| #DIV/0!      | ?         | #DIV/0! |
| #DIV/0!      | 1         | #DIV/0! |
| #DIV/0!      | ?         | #DIV/0! |
| -0.256339753 | 0.767017  | 0.35509 |
| #DIV/0!      | ?         | #DIV/0! |
| #DIV/0!      | ?         | #DIV/0! |
| 0.169925001  | 1         | 0       |
| #DIV/0!      | ?         | #DIV/0! |
| #DIV/0!      | ?         | #DIV/0! |
| #DIV/0!      | ?         | #DIV/0! |
| -3           | 1         | 0       |
| #DIV/0!      | ?         | #DIV/0! |
| #DIV/0!      | ?         | #DIV/0! |
| #DIV/0!      | ?         | #DIV/0! |
| #DIV/0!      | 1         | #DIV/0! |
| #DIV/0!      | 0.308068  | #DIV/0! |
| #DIV/0!      | ?         | #DIV/0! |
| #DIV/0!      | ?         | #DIV/0! |
| #DIV/0!      | 0.308068  | #DIV/0! |
| #DIV/0!      | ?         | #DIV/0! |
| #DIV/0!      | ?         | #DIV/0! |
| #DIV/0!      | ?         | #DIV/0! |
| #DIV/0!      | ?         | #DIV/0! |
| #DIV/0!      | ?         | #DIV/0! |
| 0.584962501  | 0.630057  | 1       |
| 0.222392421  | 1         | 0       |
| #DIV/0!      | 0.622002  | #DIV/0! |
| #DIV/0!      | ?         | #DIV/0! |
| #DIV/0!      | 0.308068  | #DIV/0! |
| #DIV/0!      | ?         | #DIV/0! |
| #DIV/0!      | ?         | #DIV/0! |
| #NUM!        | 0.308068  | #NUM!   |
| #DIV/0!      | ?         | #DIV/0! |
| #DIV/0!      | ?         | #DIV/0! |
| #DIV/0!      | 1         | #DIV/0! |
| #DIV/0!      | ?         | #DIV/0! |
| #DIV/0!      | ?         | #DIV/0! |
| #DIV/0!      | ?         | #DIV/0! |
| #DIV/0!      | ?         | #DIV/0! |
| #DIV/0!      | ?         | #DIV/0! |
| -1           | 0.0917211 | #NUM!   |
| #DIV/0!      | 0.450185  | #DIV/0! |
| #DIV/0!      | ?         | #DIV/0! |
| #DIV/0!      | ?         | #DIV/0! |
| #DIV/0!      | 0.308068  | #DIV/0! |
| #DIV/0!      | ?         | #DIV/0! |
| #DIV/0!      | ?         | #DIV/0! |
| #DIV/0!      | ?         | #DIV/0! |

|              |          |         |
|--------------|----------|---------|
| #DIV/0!      | ?        | #DIV/0! |
| #DIV/0!      | ?        | #DIV/0! |
| #DIV/0!      | ?        | #DIV/0! |
| #DIV/0!      | ?        | #DIV/0! |
| #DIV/0!      | 0.308068 | #DIV/0! |
| #DIV/0!      | ?        | #DIV/0! |
| #DIV/0!      | ?        | #DIV/0! |
| #DIV/0!      | ?        | #DIV/0! |
| #DIV/0!      | ?        | #DIV/0! |
| #DIV/0!      | 0.450185 | #DIV/0! |
| #DIV/0!      | 0.622002 | #DIV/0! |
| #DIV/0!      | ?        | #DIV/0! |
| -0.927850214 | 1        | 0       |
| #NUM!        | 0.450185 | 1       |
| -0.415037499 | 0.873517 | 0.32193 |
| 0.118644496  | 0.722447 | 0.45568 |
| #DIV/0!      | ?        | #DIV/0! |
| #NUM!        | 0.308068 | #NUM!   |
| #DIV/0!      | ?        | #DIV/0! |
| #DIV/0!      | ?        | #DIV/0! |
| #DIV/0!      | ?        | #DIV/0! |
| #DIV/0!      | ?        | #DIV/0! |
| #DIV/0!      | ?        | #DIV/0! |
| #DIV/0!      | ?        | #DIV/0! |
| #DIV/0!      | 1        | #DIV/0! |
| #DIV/0!      | ?        | #DIV/0! |
| 0            | 0.450185 | #NUM!   |
| #NUM!        | 0.308068 | #NUM!   |
| #DIV/0!      | ?        | #DIV/0! |
| #DIV/0!      | ?        | #DIV/0! |
| #DIV/0!      | ?        | #DIV/0! |
| #DIV/0!      | ?        | #DIV/0! |
| #DIV/0!      | ?        | #DIV/0! |
| #DIV/0!      | ?        | #DIV/0! |
| #DIV/0!      | ?        | #DIV/0! |
| #DIV/0!      | ?        | #DIV/0! |
| 1            | 0.481309 | 2       |
| 1.584962501  | 0.764931 | 1       |
| 1.321928095  | 0.764931 | -1      |
| #DIV/0!      | ?        | #DIV/0! |
| #DIV/0!      | ?        | #DIV/0! |
| #DIV/0!      | ?        | #DIV/0! |
| #DIV/0!      | ?        | #DIV/0! |
| #DIV/0!      | ?        | #DIV/0! |
| #DIV/0!      | ?        | #DIV/0! |
| -0.678071905 | 1        | 0       |
| #DIV/0!      | ?        | #DIV/0! |
| #DIV/0!      | 0.308068 | #DIV/0! |
| #DIV/0!      | ?        | #DIV/0! |
| #DIV/0!      | 0.308068 | #DIV/0! |
| #DIV/0!      | ?        | #DIV/0! |
| 0.415037499  | 0.860525 | 0.41504 |
| #DIV/0!      | 0.308068 | #DIV/0! |
| #NUM!        | 0.495025 | 1.58496 |
| #DIV/0!      | ?        | #DIV/0! |
| #DIV/0!      | ?        | #DIV/0! |

|              |          |          |
|--------------|----------|----------|
| #DIV/0!      | ?        | #DIV/0!  |
| #NUM!        | 1        | 0        |
| #DIV/0!      | ?        | #DIV/0!  |
| #DIV/0!      | ?        | #DIV/0!  |
| #DIV/0!      | ?        | #DIV/0!  |
| #DIV/0!      | ?        | #DIV/0!  |
| #DIV/0!      | ?        | #DIV/0!  |
| #DIV/0!      | ?        | #DIV/0!  |
| #DIV/0!      | ?        | #DIV/0!  |
| #NUM!        | 0.308068 | #NUM!    |
| #NUM!        | 0.308068 | 1        |
| #DIV/0!      | ?        | #DIV/0!  |
| #DIV/0!      | ?        | #DIV/0!  |
| #DIV/0!      | ?        | #DIV/0!  |
| #DIV/0!      | ?        | #DIV/0!  |
| #DIV/0!      | ?        | #DIV/0!  |
| #DIV/0!      | ?        | #DIV/0!  |
| #DIV/0!      | ?        | #DIV/0!  |
| #DIV/0!      | ?        | #DIV/0!  |
| #DIV/0!      | ?        | #DIV/0!  |
| 0.584962501  | 0.534406 | 1.58496  |
| 0            | 1        | 0        |
| #DIV/0!      | ?        | #DIV/0!  |
| #DIV/0!      | ?        | #DIV/0!  |
| -12.35324933 | 0.579269 | 1.16324  |
| #DIV/0!      | ?        | #DIV/0!  |
| #DIV/0!      | ?        | #DIV/0!  |
| 0.807354922  | 0.873517 | 0.32193  |
| #NUM!        | 0.308068 | #NUM!    |
| #DIV/0!      | ?        | #DIV/0!  |
| #DIV/0!      | ?        | #DIV/0!  |
| -1.067893687 | 0.807499 | 0.1704   |
| -0.181097626 | 0.925623 | -0.13451 |
| -0.310860506 | 0.944668 | 0.09238  |
| 0.157541277  | 0.985238 | -0.03368 |
| -1.028809371 | 0.818148 | -0.38679 |
| -0.610649144 | 0.899473 | 0.18854  |
| 0.487048744  | 0.797326 | 0.41219  |
| -0.101538026 | 0.903323 | 0.17148  |
| -0.207141151 | 0.895481 | 0.13927  |
| -0.17881965  | 0.974793 | 0.04993  |
| -0.912537159 | 0.57612  | -0.72472 |
| -0.584962501 | 0.4055   | 0.85561  |
| #NUM!        | 0.438509 | -2       |
| -0.214124805 | 0.910128 | -0.21412 |
| 0.807354922  | 0.875426 | 0.28758  |
| -0.263034406 | 0.989352 | -0.02018 |
| -0.712935338 | 0.928481 | 0.07942  |
| -0.40404065  | 0.919823 | 0.1158   |
| 0.493988841  | 0.318625 | 0.93231  |
| -0.047934477 | 0.837777 | -0.36257 |
| -0.413107945 | 0.931784 | -0.13549 |
| -0.032107683 | 0.882025 | 0.23113  |
| -0.103835811 | 0.977697 | -0.05306 |
| -1.813176161 | 0.765724 | -0.41956 |

|              |          |          |
|--------------|----------|----------|
| -1.794809669 | 0.77688  | -0.46416 |
| 0.736965594  | 0.509235 | 1.22239  |
| -1.967135041 | 0.292747 | -0.77593 |
| 0.467548055  | 0.65285  | 0.71898  |
| -0.297152839 | 0.980024 | 0.03009  |
| -1.662965013 | 0.648025 | 0.63472  |
| -0.700868135 | 0.921248 | -0.15162 |
| -0.129355971 | 0.959704 | -0.07671 |
| -0.344445531 | 0.963748 | 0.06246  |
| #DIV/0!      | ?        | #DIV/0!  |
| #DIV/0!      | 1        | #DIV/0!  |
| -0.482732718 | 0.965399 | 0.0455   |
| -0.130099899 | 0.94436  | -0.11112 |
| -0.103879489 | 0.842364 | 0.24993  |
| -0.085398834 | 0.976932 | 0.05191  |
| -0.074687812 | 0.993915 | -0.01232 |
| 0.759953335  | 0.98066  | -0.05335 |
| 0.187932951  | 1        | 0        |
| -0.476494504 | 0.993994 | -0.01108 |
| -0.44771991  | 0.939606 | -0.13255 |
| 0.6466632    | 0.813547 | 0.47652  |
| -0.358381101 | 0.820733 | -0.39829 |
| -0.299703599 | 0.873986 | -0.30806 |
| 0.304418921  | 0.799417 | 0.31093  |
| -0.64385619  | 0.543587 | -0.8365  |
| -0.806716703 | 0.711108 | -0.38056 |
| -0.015430041 | 0.78473  | -0.51019 |
| -0.659924558 | 0.817336 | -0.42114 |
| -0.531646686 | 0.867707 | -0.26779 |
| 0.364196302  | 0.846235 | 0.2692   |
| #DIV/0!      | 0.308068 | #DIV/0!  |
| -0.854149134 | 0.697198 | -0.7091  |
| 1.584962501  | 0.764931 | 1        |
| #NUM!        | 0.756486 | -0.58496 |
| -1.652076697 | 0.548586 | -1.28951 |
| -3.95419631  | 0.465689 | -1.56188 |
| -1.59821535  | 0.58181  | -0.63954 |
| -1.664396968 | 0.87219  | -0.23581 |
| -2.584962501 | 0.820539 | -0.26303 |
| -0.190732112 | 0.851771 | 0.20377  |
| -0.494299928 | 0.96175  | 0.05542  |
| -0.638079444 | 0.941689 | -0.07808 |
| -0.72237867  | 0.985151 | 0.03013  |
| 0.457170862  | 0.909935 | -0.19871 |
| -0.58852032  | 0.875189 | 0.16882  |
| -0.938501962 | 0.788565 | -0.39364 |
| -0.257246253 | 0.985608 | 0.02108  |
| -0.977038852 | 0.561938 | -0.84645 |
| -0.265264229 | 0.753943 | -0.20142 |
| -0.696776504 | 0.969052 | 0.03383  |
| -0.502902485 | 0.991957 | 0.01393  |
| -0.313125691 | 0.955868 | 0.06127  |
| -0.257863995 | 0.896184 | 0.21607  |
| -0.532090347 | 0.972467 | 0.04574  |
| -0.489038081 | 0.830049 | 0.30256  |
| -0.298560839 | 0.831831 | 0.23231  |

|              |          |          |
|--------------|----------|----------|
| -0.36101369  | 0.874175 | 0.2035   |
| -0.097367837 | 0.97171  | 0.05073  |
| -0.669044875 | 0.98224  | 0.02434  |
| 1.542527234  | 0.799049 | 0.72437  |
| -0.250743    | 0.760697 | 0.33167  |
| -1.730435384 | 0.467607 | -0.27213 |
| -0.55572288  | 0.941763 | 0.11165  |
| -0.590203625 | 0.915986 | -0.14083 |
| -0.33936018  | 0.983525 | -0.03465 |
| -0.57807031  | 0.975305 | 0.05032  |
| -0.617860981 | 0.947847 | -0.09766 |
| 2.321928095  | 0.613399 | 1.58496  |
| -0.462884158 | 0.892911 | 0.16272  |
| -0.381397368 | 0.951118 | 0.06754  |
| -0.681918784 | 0.953068 | 0.05732  |
| -0.201578203 | 0.909111 | 0.16695  |
| -1.754674605 | 0.860157 | 0.21886  |
| -0.129933509 | 0.940988 | 0.12594  |
| -0.09410922  | 0.998515 | -0.00289 |
| 0            | 0.785812 | 0.58496  |
| -0.99007731  | 0.711661 | 0.54972  |
| -0.537136093 | 0.948584 | 0.07962  |
| 0.568322558  | 0.998093 | 0.005    |
| -0.437462518 | 0.943717 | 0.05474  |
| 0.359380175  | 0.656665 | 0.57611  |
| -0.609583059 | 0.948418 | 0.0904   |
| -0.346203539 | 0.936067 | 0.09244  |
| -0.386572735 | 0.931424 | -0.13671 |
| -1.107622234 | 0.789858 | 0.16832  |
| 0.230915095  | 0.665093 | 0.25526  |
| -0.115240574 | 0.887945 | 0.17371  |
| -2.54584637  | 0.174765 | -0.33111 |
| -1.104396556 | 0.91259  | 0.12083  |
| -0.535037275 | 0.706667 | 0.32599  |
| -0.241052067 | 0.943489 | 0.09408  |
| -0.33046049  | 0.9284   | 0.11147  |
| -0.346632693 | 0.827484 | 0.17822  |
| -0.609624555 | 0.894214 | 0.10982  |
| -0.624825232 | 0.983416 | -0.02889 |
| -0.488366056 | 0.882717 | -0.19444 |
| -0.358307249 | 0.934186 | 0.10837  |
| -0.250491749 | 0.921594 | -0.11548 |
| -0.564451119 | 0.79167  | -0.44223 |
| -0.503944119 | 0.947239 | 0.07589  |
| -1.459431619 | 0.409442 | -1.65208 |
| -0.293465785 | 0.874352 | -0.2558  |
| -0.130629443 | 1        | 0        |
| -0.314329923 | 0.966142 | 0.06395  |
| -0.540183287 | 0.935166 | -0.14161 |
| -0.095060667 | 0.972449 | 0.0563   |
| -0.269389901 | 0.968204 | -0.0575  |
| -0.318220465 | 0.872645 | 0.15518  |
| -0.307443585 | 0.931536 | -0.15301 |
| -0.236524879 | 0.977193 | -0.04269 |
| -0.162532867 | 0.963333 | 0.06861  |
| -0.20774437  | 0.898329 | 0.19024  |

|              |          |          |
|--------------|----------|----------|
| -0.116216871 | 0.876969 | -0.09001 |
| -0.688340241 | 0.803542 | -0.45305 |
| 0.169925001  | 0.345547 | 1        |
| -0.259277385 | 0.998278 | 0.00376  |
| -0.278994846 | 0.90776  | 0.16583  |
| -0.225071191 | 0.897132 | 0.1635   |
| -0.111818241 | 0.964322 | 0.06116  |
| -0.407619328 | 0.935617 | -0.10518 |
| -0.200043089 | 0.939042 | 0.10872  |
| -0.264740653 | 0.999305 | -0.00106 |
| -0.756518284 | 0.999186 | 0.00099  |
| -0.57193582  | 0.993734 | -0.00797 |
| -0.680931559 | 0.87318  | -0.24882 |
| -0.428093652 | 0.710652 | 0.66091  |
| -3           | 0.527911 | -1.41504 |
| #NUM!        | 1        | 0        |
| -0.84298952  | 0.800156 | -0.42667 |
| 0.181412243  | 0.799979 | 0.37154  |
| -0.417286201 | 0.996586 | 0.00573  |
| -0.456039891 | 0.908791 | -0.18449 |
| -0.468386924 | 0.950462 | 0.05407  |
| -0.410281587 | 0.980925 | 0.03758  |
| -0.339981068 | 0.997905 | -0.00373 |
| -0.288483457 | 0.987543 | -0.0243  |
| 0.85666622   | 0.686532 | 0.7448   |
| -0.205019146 | 0.768602 | 0.38258  |
| -0.047305715 | 0.869585 | 0.26497  |
| -1.042435266 | 0.580467 | -1.10402 |
| -0.51072199  | 0.992324 | -0.01508 |
| -1.278301162 | 0.779863 | -0.43201 |
| -0.610163055 | 0.926515 | 0.13314  |
| -0.343941139 | 0.961149 | -0.07203 |
| -1.459431619 | 0.430476 | -1.45943 |
| -0.360449636 | 0.890673 | 0.18017  |
| -0.260503205 | 0.983768 | 0.02493  |
| -0.485426827 | 0.958279 | -0.10692 |
| -2.252534202 | 0.698597 | -0.46004 |
| -0.864055998 | 0.886962 | -0.19322 |
| -0.50595269  | 0.977476 | -0.02429 |
| -1           | 0.651448 | -1       |
| -0.28993859  | 0.953603 | 0.08044  |
| -0.736965594 | 0.593125 | -1.32193 |
| -0.378511623 | 0.676622 | -0.70044 |
| -1.645504043 | 0.585168 | -1.0066  |
| 0.415037499  | 0.748162 | -1       |
| -1.076235586 | 0.745373 | -0.57571 |
| -0.597701613 | 0.933425 | -0.13507 |
| 0.595268578  | 0.986259 | 0.03742  |
| #DIV/0!      | ?        | #DIV/0!  |
| 2.415617051  | 0.919152 | 0.50909  |
| -0.635661213 | 0.998676 | -0.00266 |
| -0.595609745 | 0.962231 | 0.08246  |
| #DIV/0!      | 0.329316 | #DIV/0!  |
| -0.504042505 | 0.935146 | 0.10692  |
| -1.077167861 | 0.733346 | -0.43522 |
| -3.459431619 | 0.925659 | -0.1375  |

|              |          |          |
|--------------|----------|----------|
| 0.640019387  | 0.871672 | 0.32135  |
| #DIV/0!      | ?        | #DIV/0!  |
| -1.625934282 | 0.737486 | -0.5649  |
| 0            | 1        | 0        |
| -0.485224358 | 0.956462 | -0.08765 |
| -0.36732949  | 0.971361 | 0.05706  |
| -0.057257318 | 0.79115  | 0.3208   |
| -1.836741031 | 0.933799 | 0.13654  |
| -0.655351829 | 0.758413 | -0.56789 |
| -0.458273425 | 0.937142 | -0.12367 |
| -0.266947006 | 0.955433 | 0.06681  |
| -3.426264755 | 0.582291 | -1.03395 |
| -1           | 1        | 0        |
| -1.584962501 | 0.513713 | -1.58496 |
| -0.403087743 | 0.937513 | -0.12427 |
| -0.493938327 | 0.956194 | -0.08318 |
| -0.584962501 | 0.637618 | 0.73697  |
| -2.349807127 | 0.932094 | -0.09265 |
| -0.415037499 | 0.105444 | 2        |
| -0.628555136 | 0.95436  | -0.07576 |
| -0.387023123 | 0.660507 | -0.62803 |
| #DIV/0!      | 1        | #DIV/0!  |
| 0.91723254   | 0.604283 | 0.97909  |
| -1.032876156 | 0.619534 | -0.63586 |
| -1.58060115  | 0.868471 | -0.25369 |
| #DIV/0!      | 0.308068 | #DIV/0!  |
| -0.128563968 | 0.977063 | -0.04431 |
| -1.10780329  | 0.800841 | 0.25338  |
| -0.160796212 | 0.910403 | -0.2121  |
| -0.481024635 | 0.639022 | 0.89722  |
| -1.459431619 | 0.654538 | -0.87447 |
| -1.807354922 | 0.209624 | #NUM!    |
| -0.546452938 | 0.860467 | 0.26707  |
| -2.584962501 | 0.659329 | 0.73697  |
| -0.700439718 | 0.87266  | -0.30812 |
| 0.064130337  | 0.896882 | 0.24101  |
| -0.616452787 | 0.911022 | 0.16701  |
| 0.321928095  | 1        | 0        |
| -0.263034406 | 0.964467 | 0.06333  |
| -0.468564788 | 0.9164   | -0.16318 |
| -1           | 0.764931 | 0.58496  |
| -2.244821603 | 0.549472 | -1.20203 |
| -1.440572591 | 0.773421 | -0.44057 |
| 0.59454855   | 0.74493  | 0.64155  |
| -0.034794382 | 0.912658 | 0.16178  |
| #DIV/0!      | ?        | #DIV/0!  |
| -0.175804089 | 0.993949 | -0.01241 |
| -0.376857836 | 0.981847 | 0.0254   |
| -1.102619373 | 0.77566  | -0.41459 |
| -0.019063299 | 0.968833 | -0.05899 |
| -0.711292555 | 0.702066 | -0.70073 |
| -0.660671203 | 0.879143 | 0.07531  |
| -0.023323522 | 0.946991 | -0.07635 |
| 0.283498508  | 0.95184  | 0.05922  |
| -0.991992421 | 0.991071 | 0.01994  |
| 0.22803653   | 0.943153 | 0.10869  |



|              |           |          |
|--------------|-----------|----------|
| -0.343790244 | 0.910965  | 0.1344   |
| 0.160613696  | 0.919622  | 0.16188  |
| -0.258451659 | 0.788584  | -0.5249  |
| -1.415037499 | 0.628531  | 0.37851  |
| 0.415037499  | 0.732602  | -0.41504 |
| -0.560825958 | 0.976505  | -0.04511 |
| -1.295455884 | 0.818217  | -0.36257 |
| -0.368021359 | 0.903954  | 0.15685  |
| -1.80604159  | 0.690552  | -0.68915 |
| -0.277304646 | 0.780282  | -0.57455 |
| -1           | 0.6882    | 0.80735  |
| 0.415037499  | 0.749667  | -0.71049 |
| 0.281412935  | 0.959598  | 0.09033  |
| 0.180826325  | 0.992454  | 0.0183   |
| 0.038208319  | 0.970998  | 0.06098  |
| -0.736965594 | 0.853296  | -0.10208 |
| -2.027201806 | 0.958733  | -0.0869  |
| -1.865201993 | 0.984239  | 0.03111  |
| -1.600982421 | 0.9952    | 0.00941  |
| -0.608041271 | 0.781914  | 0.45396  |
| -1.618268587 | 0.715644  | -0.59548 |
| -0.641403195 | 0.965932  | 0.06801  |
| -0.704013621 | 0.666496  | 0.75401  |
| #DIV/0!      | ?         | #DIV/0!  |
| 0.014306874  | 0.802076  | 0.39558  |
| 1.27478244   | 0.924204  | 0.25792  |
| -3.938599455 | 0.329165  | -1.89907 |
| 0.054330601  | 0.835061  | 0.33578  |
| -2.193711677 | 0.842749  | -0.27445 |
| -1.514097005 | 0.953469  | 0.10542  |
| -1.842404021 | 0.966179  | 0.07423  |
| 0.81433904   | 0.873455  | 0.35447  |
| -0.380103709 | 0.975756  | -0.05254 |
| -0.494764692 | 0.894712  | -0.23642 |
| -0.244371353 | 0.91779   | -0.16455 |
| -1.769516166 | 0.841823  | -0.33047 |
| -0.48728657  | 0.989106  | 0.02076  |
| 0.032061209  | 0.850044  | 0.30563  |
| -1.391637067 | 0.808238  | 0.42588  |
| -1.851311397 | 0.6545    | -0.79942 |
| -0.21899168  | 0.663642  | 0.63826  |
| -1.206450877 | 0.923788  | -0.152   |
| -0.308246983 | 0.727894  | 0.56475  |
| -1.396890153 | 0.948796  | -0.10084 |
| #DIV/0!      | 0.308068  | #DIV/0!  |
| -0.4825626   | 0.861762  | 0.14534  |
| -0.545771038 | 0.888642  | 0.19453  |
| -0.378511623 | 0.326763  | -3.70044 |
| -0.388761496 | 0.91366   | 0.12515  |
| -0.325095374 | 0.854404  | -0.24293 |
| -2.097610797 | 0.139728  | -1.83458 |
| -1.959358016 | 0.0168868 | -2.54432 |
| -0.695993813 | 0.963876  | -0.03607 |
| 3.987060944  | 0.85366   | 1.65208  |
| -0.445524421 | 0.937728  | 0.10025  |
| -1.321928095 | 0.436998  | -2.32193 |

|              |          |          |
|--------------|----------|----------|
| -0.662965013 | 0.98095  | -0.03847 |
| -0.621488377 | 0.967108 | -0.06774 |
| -0.666671167 | 0.893341 | -0.16711 |
| -0.736049168 | 0.931399 | -0.10843 |
| -0.731749265 | 0.978446 | -0.02546 |
| -0.625161329 | 0.965398 | 0.03799  |
| -1.193499713 | 0.704215 | -0.45061 |
| -0.955004517 | 0.652888 | -0.42135 |
| 0.155444177  | 0.882556 | 0.19875  |
| -0.511953424 | 0.871158 | 0.18704  |
| -0.388342633 | 0.865508 | 0.12476  |
| -0.8259706   | 0.778289 | -0.34456 |
| -0.344733941 | 0.78     | 0.25332  |
| -0.426857146 | 0.990687 | 0.01754  |
| -0.386595802 | 0.914692 | -0.17911 |
| -0.307041588 | 0.825231 | 0.215    |
| -0.066761932 | 0.596092 | 0.4568   |
| -0.316745788 | 0.934712 | 0.09703  |
| -0.458027239 | 0.981853 | -0.03012 |
| -0.347194853 | 0.909913 | 0.11018  |
| -0.405507925 | 0.954068 | -0.08955 |
| -0.524142634 | 0.964852 | -0.05021 |
| -0.174573505 | 0.97806  | -0.04608 |
| -0.066942349 | 0.952388 | 0.08113  |
| -0.451143352 | 0.973595 | -0.04941 |
| 0.000695241  | 0.921614 | 0.1583   |
| -0.506327037 | 0.962297 | -0.06694 |
| -0.44534042  | 0.948162 | -0.10438 |
| -0.394385436 | 0.988384 | 0.02066  |
| -0.200402794 | 0.965816 | 0.04933  |
| -0.471339234 | 0.619082 | 0.29143  |
| -0.530231447 | 0.964865 | -0.06037 |
| -0.371360247 | 0.934452 | 0.08607  |
| -0.442965286 | 0.985216 | 0.02831  |
| -0.417858101 | 0.88852  | 0.12559  |
| -0.521791174 | 0.94565  | 0.08115  |
| -0.401250548 | 0.927109 | -0.12391 |
| -0.38492877  | 0.848417 | 0.20063  |
| -0.549289209 | 0.950334 | -0.09131 |
| -0.921011704 | 0.900467 | 0.07306  |
| 0.415037499  | 1        | 0        |
| #DIV/0!      | 0        | #DIV/0!  |
| -1           | 1        | 0        |
| -1.08246216  | 0.761792 | -0.58496 |
| -0.48877558  | 0.976408 | 0.04677  |
| -0.664984584 | 0.947309 | 0.09376  |
| -0.440861275 | 0.960517 | -0.07748 |
| -0.637429921 | 0.677453 | -0.63743 |
| 0.514573173  | 0.767879 | 0.65208  |
| -0.499699896 | 0.911943 | -0.162   |
| -0.41357951  | 0.666656 | 0.36836  |
| 0.222038863  | 0.947284 | 0.11643  |
| -0.5262845   | 0.91011  | -0.15389 |
| -0.124302131 | 0.947251 | -0.1046  |
| -0.412996912 | 0.986471 | 0.02355  |
| 0.231325546  | 0.68544  | 0.42197  |

|              |           |          |
|--------------|-----------|----------|
| -0.357031896 | 0.867414  | 0.23973  |
| 0.168481512  | 0.928451  | 0.14142  |
| -1.560509457 | 0.548759  | -1.16993 |
| -0.347923303 | 0.647196  | 0.44057  |
| -0.380091292 | 0.982745  | 0.03494  |
| #DIV/0!      | 0.308068  | #DIV/0!  |
| #DIV/0!      | 0.353387  | #DIV/0!  |
| -1.545741191 | 0.680305  | -0.44953 |
| 0.678071905  | 0.0954145 | 1.48543  |
| -0.755268204 | 0.747478  | 0.24415  |
| -0.54288757  | 0.837065  | 0.21919  |
| -0.223105391 | 0.974515  | 0.03951  |
| -0.887708458 | 0.123473  | 0.4895   |
| -0.659500809 | 0.708615  | 0.21629  |
| -1.000248713 | 0.724853  | 0.39011  |
| -0.608707986 | 0.291636  | 0.41299  |
| -0.062256649 | 0.554956  | 0.43183  |
| -1.090017244 | 0.769083  | -0.19715 |
| -1.322693443 | 0.0754979 | 0.22771  |
| -0.797249203 | 0.484736  | -0.35732 |
| 0.026977885  | 0.980431  | 0.04423  |
| -0.584962501 | 0.756486  | -0.58496 |
| 0            | 0.62268   | -1.45943 |
| -0.369613356 | 0.990742  | 0.0127   |
| -0.210372648 | 0.983738  | 0.0308   |
| -0.396352936 | 0.983832  | -0.02767 |
| -0.55513114  | 0.992143  | -0.01092 |
| -0.665546333 | 0.913459  | -0.14277 |
| -0.491581803 | 0.982556  | -0.02596 |
| -0.587183741 | 0.881755  | 0.17009  |
| -0.305163212 | 0.900823  | 0.16651  |
| -0.115477217 | 0.886547  | -0.2854  |
| 0.152003093  | 0.451594  | 1.22239  |
| 0.263034406  | 0.838734  | -0.32193 |
| 2.321928095  | 0.617945  | 1.41504  |
| -0.540407069 | 0.76546   | -0.51483 |
| 0.246160587  | 0.646922  | 0.70302  |
| -0.628797289 | 0.843404  | -0.25757 |
| #DIV/0!      | ?         | #DIV/0!  |
| -0.191506857 | 0.805891  | 0.30429  |
| -0.763797672 | 0.880303  | 0.13446  |
| -0.407956717 | 0.834963  | 0.20167  |
| -0.084892541 | 0.744413  | 0.47929  |
| 0.044854236  | 0.960101  | -0.078   |
| -0.358077098 | 0.974395  | 0.03936  |
| -0.251754481 | 0.737076  | 0.25281  |
| -0.102391083 | 0.801573  | 0.26719  |
| -0.493040011 | 0.920843  | -0.16259 |
| -0.539356201 | 0.916648  | -0.15459 |
| -0.387975004 | 0.923795  | -0.13781 |
| -0.706268797 | 0.523695  | -0.59664 |
| -1.9162764   | 0.187054  | -0.99185 |
| -1.856534559 | 0.408542  | -0.94995 |
| -1.680435632 | 0.339006  | -0.95086 |
| -1.447458977 | 0.334074  | -0.81943 |
| -1.608634239 | 0.427292  | -0.80204 |

|              |          |          |
|--------------|----------|----------|
| -1.857419428 | 0.226281 | -1.09344 |
| 0.111546653  | 0.843148 | 0.28604  |
| -0.421988495 | 0.994908 | 0.00859  |
| -0.729243969 | 0.817559 | -0.08924 |
| -1.85553782  | 0.361244 | -1.086   |
| -0.345658376 | 0.959815 | 0.06901  |
| -0.233439624 | 0.969248 | -0.07151 |
| -1.934904972 | 0.318429 | -0.63005 |
| -0.752689946 | 0.725853 | -0.3278  |
| -2.321928095 | 0.956122 | -0.08286 |
| -0.517130205 | 0.983484 | 0.03036  |
| -0.540238056 | 0.837377 | 0.33279  |
| -0.192645078 | 0.382278 | 1.24793  |
| -2.700439718 | 0.85427  | -0.24101 |
| -0.110482472 | 0.959312 | 0.06493  |
| -0.077894498 | 0.95599  | 0.08861  |
| -0.328442923 | 0.842164 | 0.20966  |
| -0.46400904  | 0.976265 | -0.03855 |
| -0.115952564 | 0.980436 | 0.04608  |
| -0.533302851 | 0.960427 | 0.07261  |
| -0.407290331 | 0.985807 | -0.01536 |
| 0.191187516  | 0.960165 | 0.0902   |
| -1.087462841 | 0.47679  | -0.91754 |
| -0.382488299 | 0.459586 | 0.41098  |
| -0.589066899 | 0.963637 | -0.05429 |
| -0.321928095 | 0.766122 | 0.27602  |
| -0.774271412 | 0.877815 | -0.10875 |
| -0.409755508 | 0.95669  | -0.0801  |
| -0.295287315 | 0.945365 | -0.11044 |
| -0.514060518 | 0.870105 | -0.28117 |
| -0.465459881 | 0.935656 | -0.09732 |
| -0.53089922  | 0.92169  | -0.1359  |
| -0.335391861 | 0.968033 | -0.0679  |
| -0.459466903 | 0.934391 | -0.137   |
| -0.490930952 | 0.872741 | -0.25298 |
| -0.16881224  | 0.963943 | -0.06373 |
| -2.044394119 | 0.57755  | -0.95693 |
| -0.319203458 | 0.962005 | 0.08216  |
| -0.449960165 | 0.927338 | -0.15211 |
| 0.191481145  | 0.941748 | -0.15718 |
| -0.306129385 | 0.896996 | 0.16719  |
| -0.991464803 | 0.69119  | -0.6899  |
| -0.250303847 | 0.977636 | -0.0514  |
| -0.181717501 | 0.887609 | 0.2681   |
| 0.105052679  | 0.967653 | 0.07388  |
| -0.610516283 | 0.903125 | -0.1681  |
| -0.490805007 | 0.947347 | 0.10199  |
| -0.368534563 | 0.933088 | -0.15224 |
| -1.765534746 | 0.379946 | -0.91754 |
| -0.54528726  | 0.902817 | -0.17058 |
| -0.239753582 | 0.933727 | 0.11919  |
| -1           | 0.651448 | 0.58496  |
| -1.280107919 | 0.902299 | -0.18057 |
| -1.263034406 | 0.325424 | -2.58496 |
| 0.092378511  | 0.97445  | -0.06171 |
| -1.678071905 | 0.453522 | -1.67807 |

|              |          |          |
|--------------|----------|----------|
| -0.497171442 | 0.958841 | -0.0924  |
| -0.631556317 | 0.992115 | 0.01765  |
| -0.307759029 | 0.999353 | -0.00128 |
| -0.707009782 | 0.915515 | -0.16827 |
| -0.307558592 | 0.99084  | -0.01406 |
| -0.520301309 | 0.950959 | -0.07559 |
| -0.178912621 | 0.68489  | 0.36813  |
| -1.600456727 | 0.590981 | -0.69946 |
| -0.853958465 | 0.843749 | -0.22487 |
| -0.772704761 | 0.874898 | -0.21806 |
| 0.129756006  | 0.888158 | 0.18857  |
| 0.476237656  | 0.972379 | 0.05288  |
| -0.167512467 | 0.979424 | 0.03695  |
| -0.048776087 | 0.667207 | 0.50319  |
| -0.28275264  | 0.397674 | 0.93888  |
| -0.751320887 | 0.778335 | 0.37436  |
| 0.289506617  | 0.670622 | 0.63743  |
| 3.119888091  | 0.889791 | 0.95842  |
| -2           | 0.230584 | -2       |
| -0.51565463  | 0.880094 | 0.15249  |
| -0.448170658 | 0.951931 | -0.09433 |
| -0.081115734 | 0.985315 | 0.02522  |
| -1.033276155 | 0.770521 | -0.45015 |
| -1.145850866 | 0.767598 | -0.37851 |
| 2.311201688  | 0.976888 | 0.152    |
| -0.532895683 | 0.885085 | -0.21274 |
| -0.94753258  | 0.889684 | 0.22239  |
| -0.489554713 | 0.840824 | 0.25319  |
| -0.306318504 | 0.993227 | -0.0111  |
| -0.382857094 | 0.978507 | -0.03107 |
| -0.516648858 | 0.956675 | 0.05789  |
| -0.25333281  | 0.981566 | 0.04253  |
| -0.55763027  | 0.832147 | -0.36774 |
| -0.502101861 | 0.971309 | -0.05276 |
| -0.944934299 | 0.798988 | 0.14607  |
| -0.945230642 | 0.881179 | 0.02795  |
| -0.662885501 | 0.934137 | -0.09057 |
| -0.618884716 | 0.953299 | 0.02923  |
| -0.863365308 | 0.611051 | 0.45508  |
| -1.25181828  | 0.930617 | -0.07052 |
| -1.224495884 | 0.862235 | 0.23051  |
| -0.199867752 | 0.870233 | 0.20619  |
| -0.030275111 | 0.967071 | 0.07762  |
| -0.365317312 | 0.939873 | -0.13223 |
| -0.481494482 | 0.888794 | -0.24629 |
| -0.320796241 | 0.926943 | -0.14602 |
| -0.549775466 | 0.234625 | 0.93918  |
| -0.944020149 | 0.186867 | -0.46513 |
| -1.645686227 | 0.514038 | 0.38481  |
| -0.135675875 | 0.980911 | -0.04336 |
| -0.811894909 | 0.955282 | 0.09558  |
| -0.465768301 | 0.837347 | 0.37716  |
| -0.655362062 | 0.919216 | -0.15233 |
| -0.187064064 | 0.759393 | 0.41073  |
| 0.056499126  | 0.910231 | 0.1504   |
| -1.181606806 | 0.64582  | -0.32971 |

|              |          |          |
|--------------|----------|----------|
| 1.135916109  | 0.791445 | 0.60039  |
| -0.505989327 | 0.857108 | -0.30269 |
| -0.066831508 | 0.910124 | -0.2003  |
| -0.39094229  | 0.980437 | -0.02503 |
| -0.111704191 | 0.995785 | 0.0102   |
| -0.394048987 | 0.912497 | 0.095    |
| 0.011869166  | 0.949942 | -0.1311  |
| -0.578939599 | 0.922554 | -0.13931 |
| -0.057143907 | 0.915209 | -0.17871 |
| -0.565821072 | 0.962177 | -0.05578 |
| -0.432874184 | 0.814411 | 0.22871  |
| -0.505752113 | 0.712275 | 0.33617  |
| -0.636637779 | 0.952711 | -0.04464 |
| -0.104143455 | 0.477843 | 0.83361  |
| -0.88484109  | 0.97068  | 0.04922  |
| -1.337890255 | 0.919955 | -0.10981 |
| -1           | 0.857165 | 0.28951  |
| -0.446992487 | 0.984682 | 0.02145  |
| -0.407105195 | 0.982359 | 0.02775  |
| -0.302090692 | 0.981708 | 0.02463  |
| -0.281809067 | 0.590016 | 0.42448  |
| -0.388248635 | 0.998601 | -0.00299 |
| -0.381492901 | 0.990548 | 0.01926  |
| -0.341036918 | 0.848112 | -0.26738 |
| -0.38081039  | 0.996819 | 0.00546  |
| -1.275751503 | 0.476113 | -0.68903 |
| -0.433002602 | 0.909687 | 0.10011  |
| -2.389420466 | 0.62708  | -0.76592 |
| -1.039227284 | 0.277286 | -2.49946 |
| -1.007201916 | 0.955929 | 0.05438  |
| -0.348934955 | 0.999552 | 0.00073  |
| -0.198779864 | 0.91852  | -0.19878 |
| -0.518389659 | 0.895604 | 0.17033  |
| -1.208442345 | 0.742453 | -0.48656 |
| -1.584962501 | 0.456444 | -1.58496 |
| -1.374395515 | 0.831924 | -0.32193 |
| -0.663691415 | 0.938976 | -0.07495 |
| -0.468604623 | 0.807236 | 0.21112  |
| -0.322342856 | 0.730877 | 0.31796  |
| -0.478936166 | 0.943658 | 0.08204  |
| -0.585940867 | 0.938382 | 0.06978  |
| -0.626202575 | 0.991578 | -0.0079  |
| -0.416490386 | 0.673421 | 0.29147  |
| -0.379377186 | 0.93452  | 0.09723  |
| -0.38009081  | 0.884198 | 0.14855  |
| -0.377191292 | 0.952428 | 0.06317  |
| -0.401072737 | 0.976684 | -0.03677 |
| -0.477385653 | 0.946597 | 0.05962  |
| -0.296402978 | 0.983763 | 0.02845  |
| -0.442087287 | 0.997389 | 0.00414  |
| -0.943416472 | 0.826268 | -0.25154 |
| -0.465663572 | 0.996197 | -0.00767 |
| -0.478286967 | 0.829413 | -0.31356 |
| -0.430667058 | 0.991359 | 0.01497  |
| -0.07700307  | 0.971112 | 0.06021  |
| -0.967195152 | 0.856838 | -0.31135 |

|              |           |          |
|--------------|-----------|----------|
| 0.382471613  | 0.485428  | 0.66838  |
| 0.269058193  | 0.928614  | 0.15983  |
| -0.678071905 | 1         | 0        |
| #DIV/0!      | 0.308068  | #DIV/0!  |
| #DIV/0!      | ?         | #DIV/0!  |
| -1.652076697 | 0.918794  | -0.1375  |
| 0            | 0.450185  | #NUM!    |
| #DIV/0!      | 1         | #DIV/0!  |
| #DIV/0!      | ?         | #DIV/0!  |
| #DIV/0!      | ?         | #DIV/0!  |
| -2.415037499 | 0.895983  | 0.16993  |
| 0            | 0.450185  | 2        |
| #NUM!        | 0.308068  | #NUM!    |
| 0.415037499  | 0.606286  | 1        |
| 0            | 0.230584  | 2        |
| #DIV/0!      | ?         | #DIV/0!  |
| #DIV/0!      | 0.308068  | #DIV/0!  |
| #DIV/0!      | ?         | #DIV/0!  |
| #DIV/0!      | ?         | #DIV/0!  |
| #DIV/0!      | ?         | #DIV/0!  |
| #DIV/0!      | ?         | #DIV/0!  |
| #DIV/0!      | ?         | #DIV/0!  |
| -0.584962501 | 0.710482  | -0.58496 |
| -1.584962501 | 0.513713  | -1.58496 |
| -0.700439718 | 0.856143  | -0.24101 |
| -0.449422121 | 0.951348  | -0.08668 |
| -2.093392647 | 0.516154  | 0.40462  |
| -1.4230066   | 0.646914  | -0.42071 |
| -0.182034684 | 0.630457  | 0.54194  |
| -0.572449889 | 0.842484  | 0.20578  |
| -0.341494263 | 0.956694  | 0.06264  |
| -3.037193372 | 0.154046  | -1.93336 |
| -1.754887502 | 0.0210425 | -1.16993 |
| -0.500988402 | 0.849335  | 0.2126   |
| -0.089462943 | 0.850624  | 0.22805  |
| -0.262891359 | 0.963298  | -0.07939 |
| -0.440480995 | 0.963872  | -0.06291 |
| -0.354374717 | 0.970183  | -0.06025 |
| -0.389585153 | 0.896948  | 0.20916  |
| -0.141438405 | 0.945772  | 0.09766  |
| -0.182203331 | 0.678463  | 0.6172   |
| 0            | 0.776099  | -0.48543 |
| -1.073282375 | 0.490392  | 0.35846  |
| -0.383246432 | 0.972092  | 0.03087  |
| #DIV/0!      | 1         | #DIV/0!  |
| -1.624490865 | 0.966329  | 0.06357  |
| -0.510194732 | 0.65422   | -0.7997  |
| #DIV/0!      | 0.308068  | #DIV/0!  |
| -0.481288581 | 0.989713  | -0.00909 |
| -0.200782127 | 0.94771   | -0.09994 |
| -0.350238132 | 0.98578   | -0.02807 |
| 1.241284822  | 0.855084  | -0.54417 |
| 0.058573693  | 0.418175  | 1.43149  |
| -1.283899965 | 0.612558  | 0.83723  |
| -0.840219556 | 0.803741  | -0.38502 |
| -0.080702948 | 0.501434  | 0.74013  |

|              |          |          |
|--------------|----------|----------|
| -0.073089432 | 0.829277 | 0.33985  |
| -0.712501245 | 0.952504 | 0.07899  |
| -0.002374308 | 0.663611 | 0.60593  |
| -0.255578601 | 0.538888 | 0.37685  |
| -0.094081243 | 0.842804 | 0.19719  |
| -0.774453226 | 0.906891 | 0.07373  |
| 2            | 1        | 0        |
| -0.220161402 | 0.943282 | 0.10664  |
| -1.169925001 | 0.944105 | 0.06711  |
| -0.587408845 | 0.840785 | 0.16169  |
| 0.019860422  | 0.914644 | 0.16706  |
| -0.375022193 | 0.789511 | -0.34015 |
| -0.183712778 | 0.885108 | 0.16592  |
| -1.46994584  | 0.897512 | -0.12126 |
| -1.487749926 | 0.661912 | -0.74749 |
| #NUM!        | 0.308068 | #NUM!    |
| -0.142125081 | 0.997795 | 0.00307  |
| -0.207982904 | 0.891474 | 0.13934  |
| -0.200262152 | 0.930037 | 0.14202  |
| -0.61432198  | 0.941633 | -0.09626 |
| -0.301890342 | 0.996334 | 0.00504  |
| -0.201112051 | 0.990905 | 0.01893  |
| -1           | 0.717686 | -0.73697 |
| -1.217781601 | 0.961909 | -0.01949 |
| -0.583402399 | 0.958362 | 0.06191  |
| -0.166908426 | 0.909691 | 0.15073  |
| -0.874863258 | 0.886035 | 0.21954  |
| -0.598097903 | 0.883265 | -0.2125  |
| -0.4433586   | 0.967829 | 0.04421  |
| -0.015397404 | 0.866102 | 0.21099  |
| -0.430847585 | 0.965742 | -0.06032 |
| -0.617624546 | 0.990331 | 0.01655  |
| -0.272515254 | 0.966824 | 0.05487  |
| -0.530823635 | 0.995391 | 0.00702  |
| -0.592774028 | 0.985299 | 0.02092  |
| -0.738669379 | 0.917177 | -0.11964 |
| -0.418758665 | 0.809318 | 0.23223  |
| -0.099535674 | 0.673234 | -0.58496 |
| -2           | 0.681777 | 0.80735  |
| -0.180572246 | 0.628092 | 0.30485  |
| 0.404035959  | 0.662684 | 0.66003  |
| 0.264257547  | 0.925963 | 0.16461  |
| -0.803278663 | 0.991543 | 0.00993  |
| -0.674621389 | 0.802571 | 0.20253  |
| -0.367465598 | 0.92786  | -0.14564 |
| -0.416855313 | 0.916035 | -0.15477 |
| -0.797719625 | 0.821105 | 0.11639  |
| -0.341360682 | 0.973422 | -0.04839 |
| 1.931544698  | 0.87185  | 0.52997  |
| 0.247927513  | 0.988486 | 0.02975  |
| -3.561878888 | 0.322058 | -2.78427 |
| -1.807354922 | 0.6882   | -0.80735 |
| -0.719892081 | 0.578348 | -1.10692 |
| -0.584962501 | 0.870945 | 0.22239  |
| -0.734761323 | 0.484173 | 1.10833  |
| #NUM!        | 0.756486 | -0.58496 |



|              |           |          |
|--------------|-----------|----------|
| -2.48956953  | 0.465257  | -1.57144 |
| -0.275634443 | 0.707332  | 0.64636  |
| -1.255771385 | 0.573032  | -0.85302 |
| -0.626416928 | 0.940917  | 0.05747  |
| 0.332815232  | 0.901409  | 0.2195   |
| -0.454401803 | 0.887651  | -0.26958 |
| -0.844930604 | 0.814442  | -0.37302 |
| -0.300260178 | 0.99872   | -0.00182 |
| 0.035430898  | 0.922548  | -0.1753  |
| -0.381661362 | 0.840452  | 0.25983  |
| -0.641702767 | 0.848595  | -0.18806 |
| #DIV/0!      | ?         | #DIV/0!  |
| -0.782714469 | 0.639746  | -0.91104 |
| -0.728745087 | 0.655813  | 0.30145  |
| -0.804849111 | 0.860648  | -0.16054 |
| -0.349716469 | 0.962027  | -0.0779  |
| -0.655745127 | 0.982218  | 0.01497  |
| -1.395928676 | 0.0115691 | 1.27501  |
| -0.541040236 | 0.939834  | -0.10144 |
| -0.542206389 | 0.973842  | -0.04315 |
| -0.469407028 | 0.955333  | -0.07307 |
| #DIV/0!      | ?         | #DIV/0!  |
| -0.344636681 | 0.930567  | -0.14374 |
| 0.019749727  | 0.997789  | 0.00397  |
| -0.64385619  | 0.982186  | -0.03608 |
| -0.542387299 | 0.930812  | 0.1042   |
| #DIV/0!      | 0.450185  | #DIV/0!  |
| -0.630613613 | 0.66432   | -0.66021 |
| -0.545812747 | 0.748313  | 0.25667  |
| -0.082016685 | 0.37947   | 0.61429  |
| 0.213186536  | 0.480555  | 0.62489  |
| 0.048565741  | 0.41623   | 0.87867  |
| -0.348012954 | 0.902962  | 0.12624  |
| -0.476869479 | 0.949194  | -0.09475 |
| -0.655584833 | 0.94758   | -0.06322 |
| -1.378777093 | 0.918637  | -0.08379 |
| -0.061560978 | 0.934489  | -0.12855 |
| -0.405040704 | 0.93021   | -0.13376 |
| -0.85657457  | 0.835392  | -0.10798 |
| -0.203503202 | 0.967412  | 0.05714  |
| -0.747523901 | 0.872466  | -0.04512 |
| -1.203283598 | 0.342562  | -0.45686 |
| -0.300305283 | 0.700875  | 0.2681   |
| -0.025648587 | 0.990571  | -0.01919 |
| -0.695145418 | 0.895306  | 0.0984   |
| -0.580623565 | 0.899638  | -0.16559 |
| -0.231960571 | 0.870125  | 0.24071  |
| -0.541453191 | 0.890241  | -0.18298 |
| -0.407260477 | 0.99069   | -0.01555 |
| -1           | 1         | 0        |
| #DIV/0!      | ?         | #DIV/0!  |
| -0.446095463 | 0.842726  | -0.35829 |
| -0.140225926 | 0.996465  | -0.00652 |
| -0.536468019 | 0.980537  | 0.029    |
| -0.250789719 | 0.940239  | -0.11378 |
| -0.209718591 | 0.984475  | -0.03284 |

|              |          |          |
|--------------|----------|----------|
| 0.099191987  | 0.909138 | 0.17036  |
| -0.158429363 | 0.890095 | 0.13561  |
| -0.579782262 | 0.953238 | 0.07909  |
| -0.062284278 | 0.623222 | 0.3501   |
| -0.041575042 | 0.964576 | 0.04244  |
| -0.25869418  | 0.921557 | 0.11462  |
| -0.172136513 | 0.868835 | 0.13607  |
| -0.0085115   | 0.947328 | 0.08726  |
| 0.032255007  | 0.943665 | 0.1012   |
| 0.038068041  | 0.972343 | -0.05963 |
| -0.284247793 | 0.930595 | 0.10876  |
| -0.574547418 | 0.718119 | 0.26202  |
| 0.050481458  | 0.839731 | 0.34955  |
| 0.034015454  | 0.987691 | 0.03008  |
| #DIV/0!      | ?        | #DIV/0!  |
| 0.23760629   | 0.987205 | -0.0351  |
| -0.327361981 | 0.707038 | 0.53717  |
| -0.181435592 | 0.989259 | -0.02372 |
| -0.057605386 | 0.998592 | 0.00284  |
| -0.308638373 | 0.937609 | -0.12534 |
| -0.247017823 | 0.990036 | 0.02223  |
| 2.157541277  | 0.637543 | 1.65711  |
| -0.2410081   | 0.458483 | -0.89308 |
| -0.579788839 | 0.790497 | -0.24612 |
| -0.568447414 | 0.823665 | -0.33504 |
| 1.467143295  | 0.574546 | 1.24151  |
| -0.442041226 | 0.765312 | -0.30949 |
| 3.313183638  | 0.835824 | 1.42294  |
| -0.423706526 | 0.998066 | -0.00311 |
| 1.002042387  | 0.578752 | 1.15459  |
| -1           | 0.606453 | -1       |
| -0.880606991 | 0.636181 | -0.95679 |
| -1.163780261 | 0.528718 | -1.07957 |
| -1.026311277 | 0.891143 | -0.17292 |
| -0.556921029 | 0.901101 | -0.20321 |
| -0.332575339 | 0.670683 | 0.58496  |
| 0.786293307  | 0.86258  | 0.43063  |
| -0.214427537 | 0.941467 | -0.1102  |
| -0.953529961 | 0.877959 | 0.27643  |
| #NUM!        | 0.450185 | -0.58496 |
| -0.590429698 | 0.918234 | 0.08658  |
| 0.15415019   | 0.928379 | 0.1263   |
| -0.588993791 | 0.9039   | -0.15077 |
| -0.342036928 | 0.988304 | 0.02027  |
| -0.180572246 | 0.901847 | 0.16046  |
| -1.350497247 | 0.704578 | -0.54314 |
| 0.152004607  | 0.912382 | 0.21323  |
| 1.518473921  | 0.742837 | 0.7903   |
| -0.169062157 | 0.998351 | -0.00347 |
| #DIV/0!      | 0.308068 | #DIV/0!  |
| 0.499571009  | 0.970004 | 0.06088  |
| 0.09367639   | 0.878795 | 0.20806  |
| -0.791300487 | 0.967126 | -0.04396 |
| 0.321928095  | 0.889735 | 0.32193  |
| -3.321928095 | 0.401498 | -2.32193 |
| -0.736965594 | 0.892901 | 0.26303  |

|              |          |          |
|--------------|----------|----------|
| #DIV/0!      | 0.308068 | #DIV/0!  |
| 0.048255169  | 0.948724 | -0.12286 |
| -0.479283543 | 0.911524 | 0.14265  |
| -0.485426827 | 0.577267 | 0.89308  |
| 0.206900245  | 0.614203 | 0.78209  |
| -1           | 0.84064  | -0.32193 |
| -0.398549376 | 0.816269 | 0.35147  |
| #NUM!        | 0.308068 | #NUM!    |
| -0.16032605  | 0.939609 | -0.13536 |
| -1.127859002 | 0.646903 | -0.87668 |
| 2.321928095  | 0.806588 | -1       |
| -0.7589919   | 0.850938 | -0.28951 |
| 0.090197809  | 0.785863 | -0.63227 |
| 0            | 0.450185 | #NUM!    |
| #DIV/0!      | ?        | #DIV/0!  |
| -1           | 0.606286 | 0.45943  |
| 0.093109404  | 0.838487 | 0.34104  |
| -2.169925001 | 0.76035  | -0.58496 |
| -0.324660473 | 0.921687 | -0.16924 |
| 0.076621282  | 0.902728 | 0.21864  |
| -0.811143183 | 0.5707   | 0.69915  |
| 0.604071324  | 1        | 0        |
| 0.901084974  | 0.845019 | 0.44514  |
| #DIV/0!      | ?        | #DIV/0!  |
| 0.263034406  | 0.792435 | 0.32193  |
| -2.321928095 | 0.14822  | #NUM!    |
| #DIV/0!      | ?        | #DIV/0!  |
| -2.502500341 | 0.428902 | -1.08746 |
| 0            | 0.450185 | #NUM!    |
| 1.359167495  | 0.745508 | 0.68506  |
| #DIV/0!      | 0.308068 | #DIV/0!  |
| -0.605721061 | 0.784243 | -0.54432 |
| #DIV/0!      | ?        | #DIV/0!  |
| 1            | 1        | 0        |
| 0.152003093  | 0.918198 | -0.19794 |
| #DIV/0!      | 0.450185 | #DIV/0!  |
| 0            | 0.72386  | 0.70044  |
| -1.140862536 | 0.356327 | -0.73976 |
| #DIV/0!      | ?        | #DIV/0!  |
| -0.800691192 | 0.696873 | -0.75489 |
| #DIV/0!      | 0.308068 | #DIV/0!  |
| -1           | 0.651448 | -1       |
| -0.131865448 | 0.9609   | -0.08502 |
| #DIV/0!      | ?        | #DIV/0!  |
| 0.304854582  | 1        | 0        |
| 0            | 0.613399 | -1.58496 |
| -0.679373816 | 0.812673 | -0.4295  |
| #NUM!        | 0.308068 | #NUM!    |
| #DIV/0!      | ?        | #DIV/0!  |
| 1            | 1        | 0        |
| #DIV/0!      | ?        | #DIV/0!  |
| #NUM!        | 0.207565 | #NUM!    |
| 0.179828633  | 0.946781 | 0.11847  |
| 0.1090926    | 0.968736 | 0.06307  |
| -0.530650006 | 0.935581 | 0.07921  |
| -0.55488758  | 0.962925 | 0.04191  |

|              |          |          |
|--------------|----------|----------|
| -0.63058332  | 0.950246 | 0.04581  |
| 0.435386145  | 0.917379 | 0.16506  |
| -0.231005552 | 0.935306 | 0.08573  |
| -0.643511575 | 0.994502 | 0.00929  |
| -1.134948863 | 0.449909 | -0.31408 |
| -0.120392708 | 0.7332   | 0.3251   |
| -0.22262634  | 0.954894 | -0.07933 |
| -0.410979283 | 0.903633 | 0.10953  |
| -0.664012708 | 0.899421 | -0.16414 |
| -0.738996927 | 0.930342 | -0.07944 |
| -0.700439718 | 0.570269 | -1.11548 |
| -0.175340345 | 0.917195 | -0.20675 |
| 0.097509153  | 0.998388 | 0.00375  |
| -0.75667966  | 0.893688 | -0.19731 |
| -1           | 0.499897 | 1.58496  |
| -0.589090386 | 0.81931  | -0.41412 |
| -0.202237396 | 0.890508 | 0.18797  |
| 0.024591988  | 0.906816 | 0.15654  |
| -0.277618539 | 0.943423 | 0.08664  |
| -0.289703586 | 0.883631 | 0.17593  |
| -0.513559169 | 0.966819 | -0.06148 |
| -0.834940754 | 0.976091 | 0.04307  |
| 0.657112286  | 0.703149 | -1.04509 |
| -0.437977037 | 0.939353 | -0.13082 |
| -0.652076697 | 0.910665 | 0.07557  |
| -0.772278075 | 0.841435 | -0.3477  |
| -0.115700493 | 0.961581 | 0.09587  |
| -0.688550691 | 0.948929 | 0.10645  |
| -0.489763392 | 0.926515 | -0.15573 |
| -0.394176997 | 0.96224  | -0.07069 |
| -0.216377006 | 0.988763 | 0.02095  |
| -1.290996235 | 0.709623 | -0.57384 |
| -0.386084244 | 0.998865 | -0.00222 |
| -0.301265443 | 0.943228 | 0.11543  |
| 0.003486176  | 0.854147 | 0.26884  |
| -0.362010837 | 0.997411 | -0.00513 |
| -2.076350886 | 0.471405 | -0.95606 |
| -1.584962501 | 0.329316 | #NUM!    |
| -0.913686157 | 0.804818 | -0.33009 |
| -1.547487795 | 0.857273 | -0.26684 |
| -0.189342455 | 0.941162 | -0.11644 |
| 0.094727074  | 0.986379 | -0.03378 |
| -0.431687036 | 0.931123 | -0.14799 |
| -0.346897176 | 0.999439 | 0.00087  |
| -0.375452047 | 0.928951 | 0.10586  |
| -0.599019062 | 0.917355 | -0.16548 |
| -0.025969684 | 0.958797 | -0.09376 |
| -0.378233669 | 0.96622  | -0.06035 |
| -0.437872655 | 0.984342 | -0.02768 |
| -0.139614746 | 0.872742 | 0.22272  |
| -0.502500341 | 0.92147  | -0.14975 |
| -0.249370896 | 0.935282 | -0.13927 |
| -0.381632806 | 0.992871 | -0.01358 |
| -0.43840594  | 0.964947 | 0.04411  |
| -0.333081903 | 0.635026 | 0.42865  |
| -0.379711321 | 0.967489 | -0.06365 |

|               |          |          |
|---------------|----------|----------|
| -0.325657313  | 0.954184 | -0.08435 |
| -0.513683302  | 0.947652 | -0.0899  |
| -0.104714782  | 0.974446 | 0.04442  |
| -0.373047624  | 0.96696  | -0.05795 |
| -0.468558201  | 0.911173 | -0.18001 |
| -0.323407024  | 0.981914 | -0.03483 |
| -0.479807755  | 0.971707 | 0.03869  |
| 0.114156251   | 0.952572 | 0.11416  |
| -0.256339753  | 0.871616 | -0.25634 |
| -0.035810076  | 0.962958 | 0.06728  |
| -0.254404101  | 0.907232 | 0.15704  |
| 0.133945704   | 0.917199 | 0.15644  |
| -0.192901337  | 0.929019 | -0.14849 |
| 0.099535674   | 0.837566 | 0.28011  |
| -0.159545856  | 0.862633 | -0.3021  |
| -3.093976148  | 0.685937 | -0.35147 |
| -0.229176284  | 0.931489 | -0.13903 |
| -0.440348588  | 0.764231 | -0.53897 |
| -0.755367566  | 0.808906 | -0.44497 |
| -1.469728141  | 0.91902  | -0.16539 |
| -0.321928095  | 0.960878 | 0.08159  |
| -0.462386953  | 0.697998 | 0.27349  |
| -0.075553296  | 0.926091 | -0.15026 |
| -0.210639915  | 0.980939 | -0.03828 |
| -0.663617106  | 0.90157  | -0.18708 |
| -1.700439718  | 0.62588  | -0.58496 |
| -1.108059746  | 0.949426 | -0.06075 |
| -0.00816468   | 0.896618 | 0.20036  |
| -0.4944445462 | 0.778883 | 0.33897  |
| -0.616400235  | 0.902832 | 0.15963  |
| -0.115477217  | 0.714107 | -0.61298 |
| -0.159471568  | 0.890238 | -0.1464  |
| -0.180572246  | 0.964363 | 0.06072  |
| -0.502435109  | 0.989434 | 0.0148   |
| -0.7444440715 | 0.931345 | 0.12832  |
| -0.10470881   | 0.873689 | 0.25022  |
| -0.30599869   | 0.816982 | 0.38038  |
| 0.05536031    | 0.948942 | 0.11267  |
| -0.922299031  | 0.810638 | 0.30557  |
| -1.563812555  | 0.913583 | 0.13021  |
| -0.203229207  | 0.718384 | 0.44123  |
| -0.80247675   | 0.887366 | -0.09685 |
| -0.712518467  | 0.780994 | 0.15133  |
| -0.933651027  | 0.969863 | 0.03981  |
| -2.5360529    | 0.408425 | -0.77052 |
| -0.432160081  | 0.980859 | 0.02609  |
| 0.102738106   | 0.886917 | 0.20014  |
| 2.122571458   | 0.842182 | 0.71502  |
| 0.383547213   | 0.996107 | 0.0098   |
| -0.479836558  | 0.529999 | 0.46615  |
| -0.297543936  | 0.957554 | -0.08439 |
| -0.296376095  | 0.916777 | 0.13338  |
| -0.299906045  | 0.950985 | -0.10605 |
| -0.484614906  | 0.940188 | 0.08953  |
| -0.342510559  | 0.968739 | 0.0542   |
| -0.123974073  | 0.971373 | 0.05638  |

|              |          |          |
|--------------|----------|----------|
| -1.213364263 | 0.64141  | -0.89775 |
| -2.213297212 | 0.517634 | -0.99267 |
| -0.604191517 | 0.928916 | -0.14767 |
| -1.131598022 | 0.955753 | -0.0835  |
| 0.316455135  | 0.94276  | -0.14888 |
| 0.435702061  | 0.975078 | -0.07101 |
| -0.298245038 | 0.907548 | -0.22285 |
| -0.354909356 | 0.947011 | -0.09788 |
| -0.418518068 | 0.998928 | -0.00174 |
| -1.078002512 | 0.861446 | 0.2115   |
| -0.844495083 | 0.998574 | -0.00089 |
| -1.622930351 | 0.491859 | -0.86306 |
| -0.634436701 | 0.674328 | -0.59892 |
| -0.455271424 | 0.948558 | -0.08836 |
| -0.280929294 | 0.958396 | 0.07253  |
| 1.587108411  | 0.825171 | 0.61065  |
| -0.185897316 | 0.795152 | -0.50266 |
| 2.399930607  | 0.41223  | 2.22239  |
| #DIV/0!      | ?        | #DIV/0!  |
| 1.137503524  | 0.550334 | 1.32193  |
| -1.074546953 | 0.913115 | -0.13026 |
| -1           | 0.625646 | -1       |
| 0.00905123   | 0.92191  | 0.11795  |
| -0.512486178 | 0.889846 | 0.12224  |
| -0.244022437 | 0.853659 | 0.20227  |
| -0.611614893 | 0.889941 | 0.10582  |
| -1.186700865 | 0.856028 | -0.27672 |
| -0.522036198 | 0.904355 | -0.19712 |
| -0.236606281 | 0.951293 | -0.09804 |
| 1.025750056  | 0.667986 | 0.97579  |
| 0.253227964  | 0.961061 | -0.10367 |
| -0.866818016 | 0.899458 | -0.20788 |
| -0.282399731 | 0.941582 | 0.12286  |
| -0.624040147 | 0.92736  | -0.14361 |
| -0.109635496 | 0.8808   | 0.25459  |
| -0.542560447 | 0.998437 | 0.00204  |
| -0.302929273 | 0.980739 | -0.03407 |
| -0.225322692 | 0.885002 | 0.19053  |
| -2.150559677 | 0.771675 | 0.41504  |
| -0.336481691 | 0.936857 | 0.12993  |
| -1.017799992 | 0.785558 | -0.45893 |
| -0.444878235 | 0.952075 | -0.09333 |
| -0.254799022 | 0.917663 | -0.18812 |
| -2.091922489 | 0.875253 | 0.21474  |
| -0.328514084 | 0.943517 | -0.11706 |
| -0.686842115 | 0.874181 | 0.27753  |
| -0.079071571 | 0.975405 | 0.04264  |
| -0.776090709 | 0.870786 | -0.22239 |
| 0.355280517  | 0.949097 | 0.1283   |
| -0.600392541 | 0.92259  | 0.12911  |
| 0.440572591  | 0.509    | 0.65617  |
| -0.641467571 | 0.878062 | -0.27347 |
| -0.272363766 | 0.920642 | 0.11391  |
| -0.339748184 | 0.893653 | -0.25202 |
| -0.729232805 | 0.930587 | -0.13646 |
| -0.610144095 | 0.884548 | 0.13154  |

|              |          |          |
|--------------|----------|----------|
| -0.363460861 | 0.961697 | -0.07738 |
| -0.376817867 | 0.839388 | 0.20943  |
| -0.218772106 | 0.982276 | -0.04097 |
| -0.249454816 | 0.985572 | 0.02835  |
| -0.289506617 | 0.993463 | 0.01179  |
| -1.178678487 | 0.735422 | 0.51218  |
| -0.662965013 | 0.767281 | 0.47999  |
| -0.921821992 | 0.778547 | 0.28965  |
| #DIV/0!      | 1        | #DIV/0!  |
| 0.4614593    | 0.889009 | -0.29629 |
| -0.698921772 | 0.976084 | 0.04932  |
| -0.591489009 | 0.747628 | -0.52981 |
| -1.30859115  | 0.776696 | -0.32918 |
| -0.594606652 | 0.915613 | 0.14803  |
| 0.294853694  | 0.882471 | 0.26811  |
| -0.394229313 | 0.981609 | 0.03195  |
| -0.525106147 | 0.95888  | 0.05575  |
| -0.591431996 | 0.901685 | 0.14326  |
| 0.185398214  | 0.994823 | -0.01223 |
| -0.297475051 | 0.884632 | -0.28315 |
| 0.069041644  | 0.968691 | 0.04965  |
| -0.517734143 | 0.928618 | -0.13469 |
| -0.345135486 | 0.895961 | 0.1624   |
| -0.259846762 | 0.971639 | 0.05113  |
| -0.682678395 | 0.743955 | -0.29296 |
| -0.348405214 | 0.924588 | 0.11605  |
| -0.020084246 | 0.911961 | -0.20696 |
| 0.730037874  | 0.913031 | 0.24565  |
| -1.032522994 | 0.918106 | -0.16998 |
| -1.263034406 | 0.914417 | -0.12553 |
| -0.466131347 | 0.976369 | -0.04545 |
| -0.939879008 | 0.819684 | 0.3523   |
| -0.398147877 | 0.984982 | 0.02426  |
| -2.754887502 | 0.754979 | -0.35344 |
| -0.804111508 | 0.724699 | -0.58446 |
| -0.38509571  | 0.98233  | 0.0226   |
| -0.878009476 | 0.884989 | -0.25457 |
| -3.427930141 | 0.37665  | -0.97786 |
| -1.060940186 | 0.965528 | 0.07438  |
| 0.035560313  | 0.988867 | 0.02332  |
| -0.14989543  | 0.800478 | -0.44057 |
| -0.538866086 | 0.95218  | -0.08546 |
| 0.931334065  | 0.860958 | 0.40961  |
| -1.058855324 | 0.905947 | 0.15078  |
| -1.116888494 | 0.892292 | 0.15     |
| -1.482890591 | 0.79959  | -0.45943 |
| -1.560298816 | 0.940085 | -0.12703 |
| -1.107404031 | 0.941836 | 0.11052  |
| -0.8569929   | 0.874996 | -0.26231 |
| -1.073477012 | 0.707431 | 0.55818  |
| -0.617877123 | 0.62481  | -0.89878 |
| -1.62881679  | 0.895467 | -0.2188  |
| 1.584962501  | 0.724378 | #NUM!    |
| -0.362570079 | 0.61052  | 1.078    |
| -0.152003093 | 0.869293 | 0.20163  |
| 2.402098444  | 0.646576 | 1.47805  |

|              |          |          |
|--------------|----------|----------|
| -2.031395196 | 0.401616 | -1.64845 |
| 0.207877405  | 0.734925 | 0.56057  |
| -0.308752706 | 0.957912 | 0.0898   |
| -1           | 0.525539 | -1.58496 |
| -1.912537159 | 0.520414 | -1.35614 |
| -0.261741089 | 0.646813 | 0.74213  |
| 0.497789328  | 0.894713 | 0.30021  |
| -0.385929095 | 0.946163 | 0.11482  |
| -1.596177288 | 0.94611  | -0.10422 |
| 0            | 1        | 0        |
| -0.472068444 | 0.574062 | -0.67138 |
| -1.551795637 | 0.667313 | 0.57525  |
| -0.485431791 | 0.798845 | -0.42856 |
| #NUM!        | 0.495025 | -1.58496 |
| -0.387992676 | 0.883125 | 0.24826  |
| 1            | 0.814587 | 0.5164   |
| -1.962329582 | 0.530841 | -1.0624  |
| -1.018193117 | 0.854434 | -0.27392 |
| -1.440572591 | 0.972339 | 0.04975  |
| -0.245832095 | 0.985725 | 0.02625  |
| -3.097147561 | 0.757687 | -0.43534 |
| -4.087462841 | 0.260179 | -1.91754 |
| -3.700439718 | 0.497208 | -0.89308 |
| -1.81128776  | 0.900139 | -0.17813 |
| -1.424999526 | 0.484584 | -1.54502 |
| -1.515699838 | 0.956468 | -0.09785 |
| -1.334867151 | 0.841247 | -0.33704 |
| -0.584962501 | 0.710482 | -0.58496 |
| -1.08246216  | 0.788528 | -0.41504 |
| 1.921487972  | 0.380291 | 1.59309  |
| -0.993925486 | 0.803864 | -0.29629 |
| 0.111604208  | 0.941162 | 0.1223   |
| -0.965356594 | 0.943584 | 0.12837  |
| 0.193051643  | 0.968836 | -0.08198 |
| -1.030762254 | 0.627264 | -0.58496 |
| -2.647246779 | 0.5554   | -1.1348  |
| -0.676844602 | 0.944907 | -0.09516 |
| -0.840128663 | 0.919755 | -0.13581 |
| -2.622607275 | 0.995557 | -0.0081  |
| -0.08246216  | 0.840796 | -0.36257 |
| -1.415634149 | 0.980043 | 0.04207  |
| -1.014033073 | 0.841108 | -0.3409  |
| -1.178337241 | 0.718334 | -0.29698 |
| -1.343580665 | 0.789437 | -0.34001 |
| #DIV/0!      | 1        | #DIV/0!  |
| -0.697626217 | 0.886442 | 0.16083  |
| -0.55690074  | 0.939388 | 0.09765  |
| -0.407948074 | 0.757465 | -0.40324 |
| -0.891065628 | 0.436715 | -0.81444 |
| -0.067444521 | 0.88425  | 0.2362   |
| -0.134092896 | 0.662459 | 0.84229  |
| -0.160837751 | 0.723838 | 0.35267  |
| -0.205923769 | 0.987108 | 0.02379  |
| -0.169925001 | 1        | 0        |
| -0.369297929 | 0.972357 | -0.04872 |
| -0.479992941 | 0.983565 | 0.02806  |



|              |          |          |
|--------------|----------|----------|
| -0.161280907 | 0.912864 | 0.19438  |
| -0.318971681 | 0.935662 | 0.10369  |
| -0.08246216  | 1        | 0        |
| -0.359049541 | 0.998916 | -0.00194 |
| -0.298844482 | 0.972548 | 0.0458   |
| -0.788104443 | 0.966677 | 0.04973  |
| -1.573949014 | 0.953738 | -0.06822 |
| -0.095544333 | 0.999415 | -0.00122 |
| -0.083489629 | 0.973537 | 0.04512  |
| -0.468273283 | 0.793125 | -0.45912 |
| -0.101383138 | 0.922328 | 0.11274  |
| -0.383140286 | 0.860946 | -0.27522 |
| -0.50294158  | 0.959671 | -0.07661 |
| -0.377670647 | 0.986025 | 0.02915  |
| -0.248834086 | 0.960325 | 0.07665  |
| -0.263352666 | 0.993836 | 0.012    |
| -0.081449847 | 0.953342 | -0.10375 |
| -0.35786293  | 0.938618 | -0.13048 |
| -0.357078072 | 0.989569 | 0.01964  |
| 0.023379912  | 0.994845 | 0.0115   |
| -0.28595755  | 0.939981 | -0.12618 |
| -0.3566512   | 0.937466 | -0.13616 |
| -0.072225801 | 0.954793 | 0.08648  |
| -0.179535612 | 0.962555 | -0.08526 |
| -1.309875736 | 0.795143 | -0.47204 |
| -0.269800849 | 0.95703  | -0.08553 |
| -1.078002512 | 0.27882  | -2.24793 |
| -0.487339793 | 0.836341 | -0.3189  |
| -0.395944437 | 0.953562 | 0.07202  |
| -0.614043565 | 0.822187 | 0.29241  |
| -1.109848767 | 0.63673  | -0.4393  |
| -0.351859142 | 0.974489 | 0.03824  |
| -0.371560037 | 0.990588 | 0.01755  |
| -0.386386754 | 0.954303 | 0.094    |
| -0.343051386 | 0.967938 | 0.06238  |
| -0.437524932 | 0.940929 | 0.0879   |
| -0.726954391 | 0.934311 | 0.11921  |
| -0.235610059 | 0.953124 | -0.10555 |
| -0.441032708 | 0.975902 | -0.04101 |
| -0.748130723 | 0.885389 | 0.22016  |
| -0.321928095 | 0.936256 | -0.13696 |
| -0.237591051 | 0.877761 | -0.29767 |
| -0.165211848 | 0.948471 | -0.12622 |
| -0.917626284 | 0.863354 | -0.27687 |
| -0.145829326 | 0.975412 | -0.05889 |
| -0.461128731 | 0.946728 | -0.11717 |
| -0.758461467 | 0.87056  | -0.27449 |
| -0.340688129 | 0.959565 | -0.08523 |
| -0.432091972 | 0.936571 | -0.13797 |
| -0.642732806 | 0.908473 | -0.19044 |
| -0.330668273 | 0.894825 | -0.20307 |
| -1.187309442 | 0.951088 | 0.10376  |
| -0.496368577 | 0.987693 | -0.01907 |
| -0.460383076 | 0.896725 | -0.23411 |
| -0.466955183 | 0.863285 | -0.27097 |
| -0.10207108  | 0.980788 | -0.04208 |

|              |          |          |
|--------------|----------|----------|
| -0.340575856 | 0.997721 | 0.00493  |
| -0.110555328 | 0.963629 | -0.08038 |
| -0.586442441 | 0.952815 | -0.0916  |
| -0.072941464 | 0.937046 | -0.15275 |
| -0.252008496 | 0.948527 | -0.09981 |
| 0.272743617  | 0.888035 | 0.24835  |
| -0.723491654 | 0.978397 | -0.04325 |
| -0.774639347 | 0.97232  | -0.05132 |
| -1.042259955 | 0.876177 | 0.14128  |
| -0.330081548 | 0.947017 | 0.0966   |
| -0.245325395 | 0.942283 | 0.11956  |
| -0.630721826 | 0.987872 | 0.02455  |
| -0.162902564 | 0.967826 | -0.07304 |
| -1.813055404 | 0.977824 | 0.04159  |
| -0.430412725 | 0.88186  | -0.25795 |
| -2.03562391  | 0.878244 | 0.18677  |
| -1.167130648 | 0.925581 | 0.14018  |
| -0.4949819   | 0.922781 | -0.17999 |
| -0.265858703 | 0.974539 | -0.04525 |
| -0.405478671 | 0.955534 | -0.09778 |
| -0.76509136  | 0.852703 | 0.2707   |
| -0.759086151 | 0.979265 | 0.036    |
| -1.494151315 | 0.951436 | 0.09784  |
| -0.821700699 | 0.898043 | 0.19834  |
| 0.408973198  | 0.873478 | 0.28314  |
| -0.025000395 | 0.996089 | -0.00984 |
| -0.431711054 | 0.975443 | 0.04868  |
| -0.882805968 | 0.815672 | -0.27448 |
| -0.490552283 | 0.994532 | 0.00683  |
| -0.389127178 | 0.99047  | 0.02006  |
| -0.293945682 | 0.953177 | 0.0808   |
| -0.118637514 | 0.984184 | 0.03382  |
| 0.222392421  | 0.87225  | -0.26303 |
| -0.279459954 | 0.966284 | -0.05236 |
| -0.552408056 | 0.967812 | -0.06739 |
| -0.074597735 | 0.968356 | 0.07681  |
| -0.397404549 | 0.937137 | -0.13213 |
| -0.185265548 | 0.911391 | 0.14421  |
| -0.332760722 | 0.934782 | -0.14535 |
| -0.338801913 | 0.952659 | 0.0973   |
| -0.23405227  | 0.945238 | 0.12314  |
| -0.357820212 | 0.951655 | 0.09852  |
| -0.49483821  | 0.955085 | -0.09297 |
| -1.589408406 | 0.896209 | 0.21412  |
| -0.270828308 | 0.637948 | 0.52743  |
| -0.664770542 | 0.871433 | -0.23972 |
| -0.524383292 | 0.787194 | -0.50301 |
| -0.259177667 | 0.832804 | 0.29464  |
| -0.702552386 | 0.679627 | -0.69489 |
| -0.054677093 | 0.880021 | 0.17917  |
| -0.058102955 | 0.705776 | -0.75607 |
| -0.175119343 | 0.878578 | 0.18313  |
| -0.303483994 | 0.85133  | 0.2564   |
| -0.263862589 | 0.934265 | -0.13781 |
| -0.514787207 | 0.881124 | -0.27296 |
| -1.9946862   | 0.615627 | -0.54558 |

|              |          |          |
|--------------|----------|----------|
| -0.202527843 | 0.9802   | -0.03849 |
| -0.093320804 | 0.684639 | 0.42649  |
| -0.450165723 | 0.993746 | 0.01212  |
| -0.165004939 | 0.933765 | 0.13995  |
| -0.268309348 | 0.970359 | -0.07013 |
| -0.385407672 | 0.948227 | -0.10428 |
| -0.178607934 | 0.957147 | -0.10523 |
| -0.481648391 | 0.823718 | -0.43652 |
| -0.597481201 | 0.938493 | -0.12701 |
| -0.65066279  | 0.86043  | -0.27991 |
| -0.390327358 | 0.921786 | -0.17658 |
| -0.603856812 | 0.857476 | -0.29668 |
| -0.49777793  | 0.880452 | -0.23363 |
| -0.296872743 | 0.90915  | -0.19074 |
| -0.335270222 | 0.881996 | -0.22496 |
| -0.629059188 | 0.947129 | -0.09148 |
| -0.94973879  | 0.915334 | 0.14622  |
| -0.620934216 | 0.975566 | -0.05279 |
| -0.692430721 | 0.903124 | -0.17837 |
| -0.303315315 | 0.913971 | -0.18607 |
| -0.530500234 | 0.819559 | -0.40505 |
| -0.583286426 | 0.935998 | -0.1081  |
| -0.243009295 | 0.839845 | -0.36755 |
| -0.395961995 | 0.997374 | -0.00507 |
| #NUM!        | 0.308068 | #NUM!    |
| -0.553718202 | 0.969119 | -0.04673 |
| -0.830158952 | 0.971332 | 0.0534   |
| -0.389470409 | 0.980684 | 0.03806  |
| -0.687604847 | 0.926885 | -0.13557 |
| -0.580088387 | 0.946684 | -0.09933 |
| -1.555874012 | 0.936806 | -0.10886 |
| -0.385422907 | 0.981972 | 0.02961  |
| 0.825629094  | 0.8918   | 0.26673  |
| -0.688148893 | 0.765523 | 0.32103  |
| -0.088733223 | 0.912901 | 0.17181  |
| -0.14822993  | 0.776046 | 0.34219  |
| -0.347949137 | 0.916061 | -0.14831 |
| -1.108519253 | 0.711324 | -0.49067 |
| 0.08631778   | 0.503414 | 0.56161  |
| -0.055592326 | 0.760878 | -0.61882 |
| 0.064770255  | 0.806032 | -0.47516 |
| -3.314833083 | 0.264737 | -2.24543 |
| -1.356263744 | 0.889722 | 0.182    |
| -0.706494695 | 0.914657 | 0.12125  |
| -1.26960706  | 0.545353 | -0.57679 |
| -0.634677149 | 0.982264 | 0.02888  |
| -0.407503827 | 0.96843  | 0.05557  |
| -0.82757806  | 0.876585 | -0.26561 |
| -1.277984747 | 0.856278 | 0.24558  |
| -0.674994702 | 0.757571 | 0.48396  |
| -0.754273197 | 0.935536 | -0.10182 |
| -0.332302542 | 0.836672 | -0.34857 |
| 0.633302035  | 0.823374 | 0.44596  |
| -0.661048757 | 0.900744 | -0.19081 |
| -1.477672147 | 0.842652 | -0.29815 |
| -0.418847565 | 0.807398 | 0.2699   |

|              |          |          |
|--------------|----------|----------|
| -0.002269459 | 0.890632 | 0.22737  |
| -0.512238017 | 0.996254 | 0.00622  |
| -0.350100661 | 0.976627 | -0.03002 |
| -0.296519772 | 0.906098 | 0.1396   |
| -0.429434722 | 0.901549 | 0.13404  |
| -0.128686225 | 0.946127 | 0.08587  |
| -0.554030641 | 0.925166 | -0.16046 |
| -1.507279639 | 0.580001 | -0.58974 |
| 0.12178848   | 0.788948 | 0.39623  |
| -0.666262603 | 0.969717 | 0.0581   |
| -0.176030364 | 0.91396  | 0.17425  |
| -0.308565588 | 0.971592 | -0.06106 |
| -0.405944351 | 0.982937 | 0.02805  |
| -0.559694275 | 0.965538 | 0.06283  |
| 0.250081719  | 0.938805 | 0.12773  |
| -0.341514824 | 0.991661 | -0.01648 |
| -0.308607888 | 0.888537 | 0.19742  |
| -0.390508765 | 0.981141 | 0.03233  |
| -0.319455994 | 0.926751 | 0.12324  |
| -0.456712313 | 0.934637 | 0.1023   |
| -0.425116862 | 0.929168 | 0.12253  |
| -0.1458782   | 0.940723 | 0.10526  |
| -1.723290657 | 0.672105 | -0.34269 |
| -0.385270533 | 0.963224 | 0.07296  |
| -1.425699812 | 0.710909 | -0.52367 |
| -0.694726067 | 0.93012  | 0.1167   |
| -0.643544222 | 0.956999 | -0.07076 |
| -0.650679774 | 0.916664 | -0.15331 |
| -0.098053706 | 0.977859 | 0.03958  |
| -2.662965013 | 0.845092 | -0.24793 |
| -0.921997488 | 0.580847 | 0.61143  |
| 0.554125097  | 0.970957 | 0.0681   |
| #DIV/0!      | 0.515664 | #DIV/0!  |
| -2.336327309 | 0.624284 | -0.64484 |
| -1.350221687 | 0.789376 | -0.40695 |
| -1.280107919 | 0.79911  | 0.4361   |
| -1.153656612 | 0.767333 | -0.44611 |
| -0.947353863 | 0.932822 | -0.11027 |
| -0.653826804 | 0.678987 | -0.67319 |
| -0.501411925 | 0.87635  | 0.19681  |
| -0.127869806 | 0.931455 | 0.13348  |
| #NUM!        | 0.663808 | -0.73697 |
| -0.47609507  | 0.953437 | -0.09905 |
| #DIV/0!      | 0.450185 | #DIV/0!  |
| -0.355271864 | 0.821223 | -0.40745 |
| -0.540484088 | 0.934332 | -0.13603 |
| -0.641694386 | 0.995248 | 0.00672  |
| -0.311990895 | 0.93806  | -0.12491 |
| -0.340756029 | 0.895338 | -0.20802 |
| -0.186758339 | 0.999416 | -0.00125 |
| -0.462643432 | 0.98281  | 0.02677  |
| -0.222392421 | 0.888898 | -0.22239 |
| -0.73309204  | 0.910104 | -0.16071 |
| -0.44293364  | 0.912696 | -0.17243 |
| 0.057116971  | 0.984674 | 0.03382  |
| -0.556942145 | 0.868474 | -0.28055 |

|              |           |          |
|--------------|-----------|----------|
| -0.379436724 | 0.999568  | -0.00071 |
| -0.695145418 | 0.680703  | -0.36273 |
| -0.41333515  | 0.712984  | 0.28886  |
| 0.075171999  | 0.683545  | -0.9389  |
| 0.130101739  | 0.700232  | 0.40383  |
| -0.041820176 | 0.88157   | 0.15612  |
| -0.052088511 | 0.876347  | 0.19584  |
| -0.142019005 | 0.57434   | -0.75207 |
| -0.014067678 | 0.577272  | 0.60575  |
| -0.312765432 | 0.781882  | -0.52289 |
| #DIV/0!      | ?         | #DIV/0!  |
| #DIV/0!      | 1         | #DIV/0!  |
| 0.303500997  | 0.731514  | 0.36607  |
| -0.590726872 | 0.996188  | -0.00699 |
| -0.59269574  | 0.819734  | -0.38183 |
| -0.910411206 | 0.676586  | 0.66191  |
| -0.418539265 | 0.987027  | 0.02282  |
| -0.736965594 | 0.663075  | -0.78136 |
| -1.736965594 | 0.474021  | 0.67807  |
| -0.319728625 | 0.994874  | 0.00878  |
| -0.241828901 | 0.91975   | -0.19458 |
| -0.339271572 | 0.985437  | -0.0226  |
| -0.60179694  | 0.792259  | -0.48476 |
| #DIV/0!      | ?         | #DIV/0!  |
| -1.584962501 | 0.513713  | -1.58496 |
| -0.368243288 | 0.998096  | 0.00396  |
| -0.442962845 | 0.960645  | -0.07498 |
| -0.521565593 | 0.859633  | -0.18183 |
| 1.608398146  | 0.0893919 | 2.09868  |
| 0            | 0.651448  | 1        |
| -0.693708989 | 0.789633  | -0.50636 |
| -1.819175953 | 0.527414  | -1.20925 |
| -0.608169892 | 0.817219  | -0.43911 |
| -1.884504752 | 0.932244  | -0.12914 |
| 0.099387174  | 0.993626  | 0.01544  |
| -0.550769179 | 0.916471  | -0.16342 |
| -0.069960428 | 0.891656  | 0.19829  |
| 0.289506617  | 0.826595  | 0.40296  |
| -1.477047162 | 0.489113  | -0.97226 |
| -0.601876369 | 0.956775  | -0.08667 |
| -0.449079917 | 0.589816  | 0.89465  |
| 0.562384653  | 0.691161  | 0.8239   |
| -0.326586343 | 0.972165  | -0.04337 |
| -0.723840531 | 0.771149  | -0.34759 |
| -1.222392421 | 0.755019  | -0.41504 |
| -0.961857402 | 0.664635  | -0.26137 |
| -0.340056504 | 0.972726  | 0.0301   |
| -0.563941985 | 0.94019   | -0.08909 |
| -0.682321378 | 0.953951  | -0.0781  |
| -0.741805407 | 0.996608  | -0.00727 |
| -0.807869671 | 0.89616   | -0.13982 |
| -0.098953103 | 0.882096  | 0.13012  |
| -0.840521786 | 0.904089  | -0.1375  |
| -1.058005603 | 0.619556  | -0.50043 |
| -0.553721625 | 0.860133  | -0.30632 |
| -0.56636076  | 0.984619  | -0.03422 |

|              |          |          |
|--------------|----------|----------|
| -0.310038543 | 0.982751 | -0.03691 |
| -0.459230386 | 0.943206 | -0.11752 |
| -0.33791613  | 0.991839 | -0.01768 |
| -0.04858018  | 0.847744 | 0.30849  |
| -0.49839509  | 0.966369 | 0.0485   |
| -0.537724505 | 0.989674 | -0.01742 |
| -0.464570885 | 0.977505 | -0.0402  |
| -0.293278207 | 0.978311 | -0.03813 |
| -0.580196593 | 0.912086 | -0.08859 |
| -0.136580755 | 0.998019 | -0.00381 |
| -1           | 1        | 0        |
| -0.326488256 | 0.952311 | -0.10509 |
| -0.435303715 | 0.995387 | -0.00942 |
| -0.847996907 | 1        | 0        |
| -0.193412591 | 0.883922 | -0.16754 |
| -0.543012628 | 0.925979 | -0.1406  |
| -0.074775055 | 0.951144 | -0.10973 |
| -0.05415577  | 0.904839 | -0.23001 |
| -0.465902277 | 0.91338  | -0.17052 |
| -0.549725321 | 0.794984 | 0.24932  |
| -0.497539747 | 0.982247 | -0.02995 |
| -1.047305715 | 0.861662 | -0.19931 |
| -0.448540653 | 0.952696 | -0.11437 |
| -0.138887594 | 0.892689 | 0.23308  |
| -1.065318338 | 0.663576 | -0.56908 |
| -0.847996907 | 0.848826 | -0.29546 |
| -0.26476322  | 0.835419 | -0.39502 |
| -0.656294851 | 0.921184 | 0.12304  |
| -0.75476302  | 0.990621 | -0.01552 |
| -2.541794642 | 0.91412  | -0.16215 |
| 1.836057632  | 0.784229 | 0.64011  |
| -0.699865929 | 0.821503 | 0.17033  |
| -0.112001518 | 0.893493 | 0.13983  |
| -1.099535674 | 0.913407 | -0.12928 |
| -0.274416546 | 0.94416  | 0.11569  |
| -0.049218628 | 0.982544 | -0.03538 |
| -2           | 0.724378 | -0.41504 |
| 0.340914984  | 0.794427 | 0.44158  |
| -2.222392421 | 0.191287 | -1       |
| -0.8161745   | 0.917307 | -0.12468 |
| -1.263034406 | 0.345547 | -1.58496 |
| 0.04580369   | 0.78811  | -0.53916 |
| -0.376022726 | 0.997286 | -0.00465 |
| -0.163574374 | 0.979479 | 0.04475  |
| -0.417576498 | 0.907037 | 0.13285  |
| -0.797693376 | 0.973121 | 0.06075  |
| -0.240002089 | 0.940998 | -0.10451 |
| 0.875793299  | 0.606257 | 0.91582  |
| 0.040736634  | 0.937738 | 0.12758  |
| -0.289931877 | 0.953336 | -0.07882 |
| -0.242406083 | 0.903244 | 0.12482  |
| -0.690584516 | 0.933503 | -0.1303  |
| -0.342651574 | 0.954758 | 0.08004  |
| -0.46649996  | 0.833915 | -0.28415 |
| -0.754887502 | 0.796095 | 0.22239  |
| -0.180572246 | 0.68342  | -0.62803 |

|              |          |          |
|--------------|----------|----------|
| 0.416910765  | 0.923669 | 0.12833  |
| -0.485768111 | 0.885198 | 0.18037  |
| -0.585772139 | 0.906281 | 0.1851   |
| 0.335122021  | 0.824275 | 0.34719  |
| -1.011563005 | 0.840933 | -0.35575 |
| -0.668255651 | 0.898912 | -0.14422 |
| -0.173263825 | 0.967669 | -0.06808 |
| 1.440703164  | 0.656373 | 1.13773  |
| 0.104652152  | 0.860727 | 0.30097  |
| #DIV/0!      | ?        | #DIV/0!  |
| -0.526471354 | 0.863344 | 0.19956  |
| 0.540568381  | 0.827242 | -0.50524 |
| -0.335420331 | 0.943661 | 0.08514  |
| -1.770132458 | 0.70789  | -0.63925 |
| -1.575563803 | 0.513778 | -1.26492 |
| -0.158972499 | 0.872062 | 0.1599   |
| -0.493349902 | 0.85765  | 0.12545  |
| -1.542527234 | 0.744648 | -0.39366 |
| -2.431049817 | 0.190942 | -3.33151 |
| 0            | 0.622002 | -1       |
| #DIV/0!      | 0.573338 | #DIV/0!  |
| -0.13492958  | 0.8863   | 0.25873  |
| 1.11189288   | 0.439175 | 1.36773  |
| -1.321928095 | 0.436998 | -2.32193 |
| -0.589536768 | 0.98134  | 0.02671  |
| #DIV/0!      | ?        | #DIV/0!  |
| 0.006177183  | 0.888173 | -0.29626 |
| -0.693143095 | 0.888029 | -0.14217 |
| -0.46332717  | 0.995873 | -0.00716 |
| -0.29310526  | 0.993849 | -0.01082 |
| -0.484084411 | 0.951747 | 0.07332  |
| -0.845409112 | 0.829606 | -0.31464 |
| -0.139354741 | 0.942303 | -0.10049 |
| -0.972308914 | 0.867007 | -0.15954 |
| -0.213058396 | 0.884496 | 0.18455  |
| -0.01048243  | 0.892147 | 0.22453  |
| -0.338409377 | 0.970611 | -0.05755 |
| -0.710084398 | 0.903223 | -0.1885  |
| 1.390459477  | 0.554083 | 1.40526  |
| -0.589249859 | 0.94227  | 0.12303  |
| -0.832724577 | 0.916442 | 0.12421  |
| -0.461730735 | 0.917933 | -0.17865 |
| -0.339088646 | 0.722595 | 0.48403  |
| -0.192748633 | 0.904406 | 0.15995  |
| -0.085359905 | 0.920506 | 0.14291  |
| -0.961093057 | 0.979736 | -0.03608 |
| -0.311475965 | 0.967237 | -0.07732 |
| -0.426264755 | 0.889424 | -0.23974 |
| 0.127192016  | 0.96799  | -0.07505 |
| -1.388213711 | 0.94413  | -0.0836  |
| #DIV/0!      | 0.308068 | #DIV/0!  |
| -0.896769843 | 0.788355 | -0.35932 |
| -0.454147661 | 0.953778 | 0.09558  |
| #NUM!        | 0.622002 | 0.58496  |
| -0.636466518 | 0.84848  | -0.2418  |
| 0.463246592  | 0.68342  | 0.52295  |

|              |           |          |
|--------------|-----------|----------|
| -0.415037499 | 0.637009  | -0.90046 |
| -2           | 0.905448  | 0.11548  |
| -0.468314626 | 0.989766  | 0.01535  |
| 0.056509061  | 0.971708  | -0.06508 |
| -0.469276061 | 0.306727  | 0.49637  |
| -0.410930474 | 0.862394  | -0.27692 |
| -0.439443789 | 0.928751  | -0.15837 |
| 0.064928781  | 0.75995   | 0.36068  |
| -0.370604996 | 0.974581  | -0.05469 |
| -0.808788775 | 0.721398  | -0.33875 |
| -0.239317111 | 0.915627  | 0.15696  |
| -0.520075252 | 0.985816  | 0.02476  |
| -0.46552727  | 0.963408  | -0.08095 |
| -0.609615476 | 0.933595  | -0.10409 |
| -0.740981642 | 0.891635  | -0.20569 |
| -0.506074529 | 0.490458  | 0.68898  |
| -1.1992347   | 0.966351  | -0.04781 |
| 0.248525274  | 0.645142  | 0.58496  |
| -1.019671066 | 0.830086  | -0.19364 |
| 0.234737049  | 0.96238   | 0.08168  |
| #DIV/0!      | 0.724378  | #DIV/0!  |
| -0.152003093 | 0.743099  | 0.43296  |
| -0.450084446 | 0.921822  | -0.18255 |
| 0.409129507  | 0.994396  | -0.0133  |
| -0.331205908 | 0.956247  | -0.07595 |
| -0.216223867 | 0.885488  | -0.26919 |
| -0.53287399  | 0.887393  | -0.19265 |
| -0.436427829 | 0.984388  | 0.02877  |
| -0.352671618 | 0.769997  | -0.45856 |
| #DIV/0!      | 1         | #DIV/0!  |
| -0.068386975 | 0.914193  | -0.15497 |
| -1.275634443 | 0.258847  | -0.65783 |
| -0.584962501 | 1         | 0        |
| -1.688383461 | 0.533491  | -0.75043 |
| -0.498183077 | 0.999009  | -0.0015  |
| -0.39202833  | 0.920673  | -0.1708  |
| #DIV/0!      | ?         | #DIV/0!  |
| #NUM!        | 1         | 0        |
| -2           | 0.320255  | #NUM!    |
| -0.331205908 | 0.869832  | 0.26919  |
| 0.038474148  | 0.984889  | 0.03847  |
| 0.303333384  | 0.568572  | -2.06017 |
| #DIV/0!      | 0.0917211 | #DIV/0!  |
| -2.700439718 | 0.171586  | -1.37851 |
| -0.721258705 | 0.725351  | -0.55639 |
| -0.809842107 | 0.87912   | -0.15431 |
| -0.736965594 | 0.648273  | -0.58496 |
| 0.723159795  | 0.969858  | 0.04509  |
| -0.616660906 | 0.751995  | -0.62873 |
| 1.807354922  | 0.441497  | 2        |
| #DIV/0!      | ?         | #DIV/0!  |
| 0.252021419  | 0.927818  | -0.19685 |
| -1.847996907 | 0.419192  | -2.16993 |
| -0.683182816 | 0.855814  | -0.26701 |
| 0.11321061   | 0.868138  | 0.26793  |
| -0.440100062 | 0.174443  | -0.56308 |



|              |           |          |
|--------------|-----------|----------|
| -2.290515142 | 0.420837  | -1.50553 |
| 2.700439718  | 0.474021  | 1.73697  |
| -0.860813597 | 0.809427  | -0.17018 |
| -0.491363716 | 0.951936  | 0.08074  |
| -2           | 0.0022595 | -1.58496 |
| -0.474243089 | 0.615003  | 0.21838  |
| -0.137503524 | 0.935963  | 0.12553  |
| -0.012725066 | 0.837662  | 0.28828  |
| -0.416123457 | 0.727245  | 0.31997  |
| -0.513261035 | 0.938836  | 0.12534  |
| -1.289506617 | 0.667004  | -0.48215 |
| -0.402125168 | 0.917503  | 0.10531  |
| #NUM!        | 0.245194  | -2.80735 |
| -0.843880798 | 0.601973  | -1.08489 |
| #DIV/0!      | ?         | #DIV/0!  |
| -1.392317423 | 0.688953  | -0.76783 |
| #DIV/0!      | 0.308068  | #DIV/0!  |
| 0.61667136   | 0.935596  | 0.18057  |
| -1.635367454 | 0.622324  | -0.68428 |
| -2.926920302 | 0.469077  | -1.20075 |
| -2.289807398 | 0.175462  | -2.05799 |
| -0.518785424 | 0.917283  | 0.12676  |
| -0.800230488 | 0.91215   | -0.19878 |
| -0.440355393 | 0.897268  | -0.20483 |
| -0.172562815 | 0.80978   | 0.35351  |
| 0            | 0.450185  | #NUM!    |
| -0.736965594 | 1         | 0        |
| -0.177000826 | 0.978013  | -0.04861 |
| 1.396890153  | 0.773585  | 0.55254  |
| 0.506959989  | 0.864816  | 0.27563  |
| -0.415037499 | 0.919687  | -0.19265 |
| -0.468448492 | 0.754045  | -0.57824 |
| -0.377623202 | 0.977991  | -0.0438  |
| 0.234465254  | 0.922846  | -0.18057 |
| -0.211504105 | 0.904409  | -0.17403 |
| #NUM!        | 0.622002  | -0.58496 |
| 0            | 0.951922  | -0.10692 |
| -0.310442625 | 0.783667  | 0.20286  |
| -0.097098688 | 0.943923  | 0.11482  |
| -0.450661409 | 0.803199  | -0.40336 |
| 0.242701404  | 0.943319  | 0.12645  |
| 0.434779472  | 0.967037  | -0.10345 |
| -1.031453614 | 0.697394  | -0.32614 |
| 0.357156583  | 0.656564  | 0.67175  |
| 2.153742395  | 0.234102  | 2.73806  |
| 0.584962501  | 0.323864  | 1.45943  |
| -1.273018494 | 0.878923  | -0.21412 |
| 0            | 0.450185  | #NUM!    |
| 0.147845468  | 0.915785  | -0.22412 |
| -1.033821528 | 0.761426  | 0.15003  |
| -2.296474321 | 0.104915  | -0.96258 |
| -0.490159532 | 0.792675  | 0.31704  |
| -0.990076259 | 0.811041  | 0.17773  |
| 1.584962501  | 1         | 0        |
| -0.870716983 | 0.489357  | -1.24511 |
| -1.160464672 | 0.548627  | -1.078   |

|              |           |          |
|--------------|-----------|----------|
| 0.668555657  | 0.723437  | 0.53551  |
| -1.584962501 | 0.653214  | -0.72833 |
| -2.624438944 | 0.528845  | -1.08303 |
| 0.253756592  | 0.804834  | -0.45251 |
| -0.276196073 | 0.91886   | 0.11419  |
| -1.169925001 | 0.771661  | -0.43296 |
| -1           | 0.198892  | -2       |
| -1.222392421 | 0.568955  | -1.22239 |
| #NUM!        | 0.544016  | -1.32193 |
| -0.602664502 | 0.935     | -0.09187 |
| 0.317005577  | 0.391184  | 0.87448  |
| -0.545233162 | 0.895079  | -0.19477 |
| #DIV/0!      | ?         | #DIV/0!  |
| -2           | 0.0805096 | -2       |
| -0.218060093 | 0.992648  | -0.01495 |
| #DIV/0!      | 0.308068  | #DIV/0!  |
| -0.397335498 | 0.908089  | -0.20503 |
| 0.034177115  | 0.904064  | 0.15447  |
| -1.321928095 | 0.428621  | -1       |
| #DIV/0!      | ?         | #DIV/0!  |
| 1.473931188  | 0.564938  | 1.35364  |
| #NUM!        | 0.308068  | #NUM!    |
| -0.58374732  | 0.934479  | 0.07955  |
| 2.584962501  | 0.888898  | 0.58496  |
| -0.807354922 | 0.883446  | -0.22239 |
| #NUM!        | 0.308068  | #NUM!    |
| -0.376854305 | 0.606843  | 0.42172  |
| -0.363431647 | 0.979205  | 0.03152  |
| -0.294687552 | 0.844583  | -0.32412 |
| -0.304034868 | 0.177535  | 1.1235   |
| 2.169925001  | 0.903291  | -1       |
| -0.188445089 | 0.88368   | 0.1903   |
| 1.584962501  | 0.450185  | #NUM!    |
| -2.321928095 | 0.0160026 | -0.8625  |
| 0.637429921  | 0.658479  | 0.73697  |
| 1.677277251  | 0.551552  | 1.48179  |
| 0.183188484  | 0.829275  | 0.26988  |
| -1.525603256 | 0.607459  | -0.81333 |
| -0.423448985 | 0.960201  | -0.05443 |
| 0.499571009  | 0.803371  | 0.48187  |
| -1.426311818 | 0.795934  | -0.27921 |
| -1.233199176 | 0.839586  | -0.08452 |
| -0.730341204 | 0.867915  | 0.15729  |
| -1.133855747 | 0.720302  | 0.39666  |
| -0.0489096   | 0.645577  | -0.90689 |
| -2.584962501 | 0.230584  | -1       |
| -1.489805268 | 0.381386  | -1       |
| 1.786596362  | 0.340158  | 2.23266  |
| 1            | 0.806588  | 0.58496  |
| #NUM!        | 0.308068  | #NUM!    |
| -1.202242722 | 0.773741  | -0.16082 |
| -1.530514717 | 0.964149  | -0.05658 |
| -1           | 1         | 0        |
| -2           | 0.116158  | #NUM!    |
| -0.321928095 | 1         | 0        |
| #DIV/0!      | ?         | #DIV/0!  |

|              |          |          |
|--------------|----------|----------|
| -0.479992941 | 0.647627 | 0.59401  |
| -0.011972642 | 0.90023  | -0.21842 |
| -0.473646016 | 0.971394 | 0.06234  |
| -0.521666879 | 0.579943 | 0.87802  |
| -0.128393779 | 0.998212 | 0.00299  |
| -1.906890596 | 0.249709 | -1.58496 |
| #NUM!        | 0.308068 | #NUM!    |
| -1.312013028 | 0.719038 | -0.42083 |
| #DIV/0!      | 0.450185 | #DIV/0!  |
| #DIV/0!      | ?        | #DIV/0!  |
| #DIV/0!      | 0.450185 | #DIV/0!  |
| -1.006602735 | 0.664662 | -0.45737 |
| -0.01227833  | 0.832189 | 0.22849  |
| -0.936582633 | 0.88955  | -0.11594 |
| #DIV/0!      | 1        | #DIV/0!  |
| -0.588585847 | 0.904743 | -0.18874 |
| #NUM!        | 0.308068 | #NUM!    |
| #DIV/0!      | 1        | #DIV/0!  |
| 0.048609944  | 0.990228 | -0.01582 |
| -0.140177658 | 0.958184 | 0.078    |
| -0.295426938 | 0.9916   | -0.01665 |
| -0.303264251 | 0.91844  | 0.12928  |
| -0.435647779 | 0.938039 | -0.12135 |
| #DIV/0!      | ?        | #DIV/0!  |
| -1.765534746 | 0.668115 | -0.38702 |
| -0.061927749 | 0.901619 | 0.20321  |
| 0.560300446  | 0.614419 | 0.67195  |
| 0            | 0.450185 | #NUM!    |
| #DIV/0!      | 1        | #DIV/0!  |
| -1.999985573 | 0.523237 | 0.80737  |
| 2.807354922  | 0.252216 | 2.80735  |
| -0.232493011 | 0.746216 | 0.35509  |
| #DIV/0!      | 1        | #DIV/0!  |
| 1.169925001  | 1        | 0        |
| -2.459431619 | 0.403383 | -2.45943 |
| -0.76898175  | 0.935861 | -0.10405 |
| -0.25022663  | 0.98929  | 0.01826  |
| -0.48112669  | 0.837018 | 0.27376  |
| #NUM!        | 0.308068 | #NUM!    |
| #DIV/0!      | ?        | #DIV/0!  |
| #DIV/0!      | ?        | #DIV/0!  |
| #DIV/0!      | 0.308068 | #DIV/0!  |
| -0.198155059 | 0.972617 | 0.05221  |
| -0.852367058 | 0.817491 | 0.05878  |
| -1.008267616 | 0.725121 | -0.36375 |
| -0.39557514  | 0.9811   | -0.02541 |
| -0.04633767  | 0.997352 | -0.00582 |
| -0.502500341 | 0.87959  | -0.22948 |
| 1.584962501  | 0.450185 | #NUM!    |
| -1.021510908 | 0.895095 | -0.15534 |
| -0.494764692 | 0.889853 | -0.17284 |
| #DIV/0!      | 0.450185 | #DIV/0!  |
| -0.617189663 | 0.936687 | -0.06194 |
| -0.18674262  | 0.955575 | 0.08051  |
| -0.262722505 | 0.926681 | 0.11795  |
| -0.089207967 | 0.961556 | -0.08921 |

|              |           |          |
|--------------|-----------|----------|
| -0.631904359 | 0.805968  | -0.42901 |
| -1.363922184 | 0.375037  | -0.70963 |
| -1.029806014 | 0.725304  | -0.48556 |
| -0.701891953 | 0.95091   | -0.08962 |
| -0.584962501 | 0.749033  | 0.41504  |
| -0.084888898 | 0.752347  | 0.29698  |
| -1.704261429 | 0.586597  | 0.83007  |
| #NUM!        | 0.756486  | -0.58496 |
| -1.158271571 | 0.785546  | -0.51298 |
| -0.387506475 | 0.783913  | -0.44    |
| 0.167968804  | 0.738719  | -0.55989 |
| -0.853451337 | 0.979444  | 0.04247  |
| -0.421463768 | 0.933509  | -0.15103 |
| -0.3309481   | 0.900274  | -0.19894 |
| 0.236044426  | 0.56386   | 0.51906  |
| -0.392317423 | 0.622002  | -1.07039 |
| 0.206450877  | 0.935503  | 0.14086  |
| -3.321928095 | 0.681777  | -0.51457 |
| -0.194087052 | 0.972495  | 0.0593   |
| -0.368387406 | 0.96922   | -0.06228 |
| #DIV/0!      | 1         | #DIV/0!  |
| -1           | 0.353387  | #NUM!    |
| 0.462955918  | 0.756259  | 0.46141  |
| -1           | 0.0917211 | #NUM!    |
| -1.115477217 | 0.911361  | 0.20645  |
| 1.222392421  | 0.593125  | 1        |
| -0.430437039 | 0.75325   | 0.26275  |
| -0.20866385  | 0.722014  | 0.38791  |
| #DIV/0!      | 0.450185  | #DIV/0!  |
| 0.415037499  | 0.769784  | 0.53051  |
| -2.169925001 | 0.296689  | -1.58496 |
| -0.207999768 | 0.836188  | 0.20267  |
| 0.295076875  | 0.659525  | 0.58837  |
| 1.584962501  | 0.860525  | -1       |
| -0.623893032 | 0.921977  | -0.13438 |
| -0.570089224 | 0.913544  | -0.16619 |
| -0.223964841 | 0.859712  | -0.22396 |
| -0.455679484 | 0.940873  | -0.11736 |
| 1            | 0.834708  | -0.32193 |
| -0.385561722 | 0.967309  | -0.04244 |
| -0.500428991 | 0.805921  | -0.50043 |
| #DIV/0!      | ?         | #DIV/0!  |
| -0.173064709 | 0.962538  | 0.08525  |
| -0.345135486 | 0.681352  | 0.55394  |
| -0.192645078 | 0.767311  | 0.45943  |
| -0.116357715 | 0.914451  | 0.13678  |
| -0.646363045 | 0.912648  | 0.1062   |
| -2.957393829 | 0.611562  | -0.50841 |
| 0.099535674  | 1         | 0        |
| #DIV/0!      | ?         | #DIV/0!  |
| 1.628031223  | 0.730986  | 0.8625   |
| -0.41676218  | 0.809488  | -0.37593 |
| -0.376611018 | 0.906416  | 0.19298  |
| -0.38768356  | 0.943028  | -0.11677 |
| -0.397130197 | 0.692609  | 0.82573  |
| -0.070389328 | 0.969748  | 0.06711  |

|              |          |          |
|--------------|----------|----------|
| 0            | 0.450185 | #NUM!    |
| 1.584962501  | 0.679547 | 1.32193  |
| -0.759914319 | 0.914748 | -0.09335 |
| -0.709409872 | 0.745678 | -0.50947 |
| -0.362777438 | 0.850323 | 0.13961  |
| -1.222392421 | 0.330453 | -1.58496 |
| -1.592313829 | 0.76053  | -0.33482 |
| -3           | 0.368766 | -3       |
| -0.477143783 | 0.968151 | 0.05815  |
| -0.816778176 | 0.918854 | 0.05649  |
| -0.334419039 | 0.849191 | -0.33442 |
| 0.392317423  | 0.827714 | -0.54057 |
| -2.321928095 | 0.415333 | -2.32193 |
| 0.272005087  | 0.854228 | 0.32088  |
| 0.07864467   | 0.917334 | 0.14853  |
| -1.584962501 | 0.623752 | -0.94111 |
| -0.571793442 | 0.722888 | 0.19386  |
| 1.220125814  | 0.437058 | 1.33141  |
| -0.367157349 | 0.93627  | -0.1304  |
| #NUM!        | 0.308068 | #NUM!    |
| -0.385330792 | 0.975211 | 0.04219  |
| -0.584962501 | 0.74706  | 0.41504  |
| 0.355871962  | 0.699462 | 0.54228  |
| -0.553935605 | 1        | 0        |
| -1           | 1        | 0        |
| -2.058893689 | 0.723577 | -0.64386 |
| #NUM!        | 0.308068 | #NUM!    |
| -0.352534256 | 0.975272 | -0.0517  |
| -1.524295137 | 0.570206 | -0.53408 |
| -0.091255416 | 0.606362 | 0.25762  |
| -0.516384845 | 0.948393 | -0.07701 |
| -0.368988065 | 0.718569 | 0.64578  |
| -0.21210591  | 0.910312 | -0.17268 |
| #DIV/0!      | ?        | #DIV/0!  |
| -0.163886085 | 0.8165   | 0.28068  |
| -113.314931  | 0.345005 | 0.94225  |
| 0            | 0.829521 | 0.37851  |
| 0.247927513  | 0.890746 | -0.24511 |
| #DIV/0!      | ?        | #DIV/0!  |
| #DIV/0!      | ?        | #DIV/0!  |
| 0.016542744  | 0.90524  | 0.20705  |
| 0.101381286  | 0.852342 | -0.35511 |
| -0.736965594 | 0.868208 | 0.26303  |
| -0.782408565 | 0.399745 | -1.25634 |
| -1.971985624 | 0.421362 | -0.97199 |
| -1.00850228  | 0.764837 | 0.58496  |
| #NUM!        | ?        | 18.265   |
| -0.374263087 | 0.934766 | -0.13686 |
| 1.584962501  | 0.764931 | 1        |
| -0.397070953 | 0.66908  | 0.46828  |
| -0.584962501 | 0.808782 | 0.28951  |
| -0.629400734 | 0.74876  | 0.43362  |
| #DIV/0!      | 1        | #DIV/0!  |
| 0.504543673  | 0.937098 | 0.13676  |
| #DIV/0!      | ?        | #DIV/0!  |
| -0.473317145 | 0.991481 | -0.01668 |

|              |           |          |
|--------------|-----------|----------|
| -0.38827059  | 0.954257  | -0.10069 |
| 0            | 0.450185  | #NUM!    |
| -2.247927513 | 0.544469  | -1.078   |
| -1.201633861 | 0.555132  | -0.82312 |
| -3.591446534 | 0.756903  | 0.29186  |
| -1.91753784  | 0.503781  | -1.5025  |
| #DIV/0!      | 0.320255  | #DIV/0!  |
| 0.129283017  | 0.605602  | -1.29956 |
| -0.817613336 | 0.946134  | 0.05299  |
| -1.778717582 | 0.974465  | -0.04685 |
| -1.906901457 | 0.301943  | 3.74503  |
| -0.614807164 | 0.731635  | -0.24945 |
| -1.285325263 | 0.419435  | 0.90769  |
| 0            | 0.450185  | #NUM!    |
| 0.584962501  | 0.860525  | 0.32193  |
| -0.452512205 | 0.972624  | -0.05628 |
| -2.700439718 | 0.38665   | -1.37851 |
| 2.658211483  | 0.416501  | 2.20945  |
| #DIV/0!      | 0.184922  | #DIV/0!  |
| -1.514573173 | 0.886496  | -0.152   |
| 1.584962501  | 0.622002  | 1        |
| #DIV/0!      | 0.308068  | #DIV/0!  |
| -0.051530301 | 0.971792  | 0.02509  |
| -1.639410285 | 0.435107  | -1.69599 |
| -0.485426827 | 0.778668  | 0.41504  |
| #DIV/0!      | ?         | #DIV/0!  |
| #DIV/0!      | ?         | #DIV/0!  |
| #NUM!        | 0.30812   | -12.9179 |
| #NUM!        | 0.0691897 | 82.6927  |
| #DIV/0!      | ?         | #DIV/0!  |
| 55.00839379  | 0.308068  | 82.1369  |
| #DIV/0!      | ?         | #DIV/0!  |
| 0.050626073  | 0.80587   | 0.44057  |
| 0            | 0.450185  | #NUM!    |
| #DIV/0!      | ?         | #DIV/0!  |
| #NUM!        | 0.308068  | #NUM!    |
| -2.182203331 | 0.404876  | -1.21022 |
| 0.05246742   | 0.891333  | 0.18371  |
| 2.169925001  | 1         | 0        |
| #DIV/0!      | 1         | #DIV/0!  |
| 0.321928095  | 0.825659  | 0.32193  |
| -0.569855608 | 0.82668   | -0.34104 |
| -1.8259706   | 0.671402  | -0.70044 |
| -1           | 0.450185  | -1       |
| -2.563768278 | 0.583696  | -0.57736 |
| -5.78119239  | 0.731196  | -0.65473 |
| #NUM!        | 0.308068  | #NUM!    |
| 0.869530068  | 0.662567  | 0.8027   |
| -1.374596086 | 0.873571  | -0.25294 |
| -0.37566934  | 0.95858   | -0.06672 |
| #DIV/0!      | ?         | #DIV/0!  |
| #DIV/0!      | 0.308068  | #DIV/0!  |
| -47.18343342 | 0.884806  | -0.26068 |
| -0.765534746 | 0.725914  | -0.5025  |
| #NUM!        | ?         | 18.2235  |
| -47.18343342 | 0.321792  | 4.92081  |

|              |           |          |
|--------------|-----------|----------|
| -1.394440595 | 0.829207  | -0.21957 |
| 0.125530882  | 0.939529  | -0.1375  |
| #DIV/0!      | 1         | #DIV/0!  |
| #DIV/0!      | 1         | #DIV/0!  |
| 0.612976877  | 0.761184  | 0.61298  |
| #NUM!        | 0.308068  | -77.0281 |
| #DIV/0!      | ?         | #DIV/0!  |
| #DIV/0!      | ?         | #DIV/0!  |
| #NUM!        | ?         | -18.3507 |
| 31.60260332  | 1         | 5.37996  |
| -1           | 0.764931  | 0.58496  |
| -1.192645078 | 0.524127  | -1.12553 |
| -0.214765547 | 0.898816  | -0.22558 |
| -2.222392421 | 0.0127949 | -0.80735 |
| #NUM!        | 1         | 0        |
| -0.631791633 | 0.871165  | -0.19355 |
| -2.088528292 | 0.55778   | -0.31249 |
| -1.204770197 | 0.973292  | 0.03419  |
| -1.058103898 | 0.95642   | -0.01689 |
| #DIV/0!      | 0.469315  | #DIV/0!  |
| -9.660449714 | 0.335589  | -3.96758 |
| 0.068943898  | 0.978184  | -0.05097 |
| -0.832496163 | 0.816957  | -0.20135 |
| #DIV/0!      | 0.308068  | #DIV/0!  |
| -1.874469118 | 0.506714  | -1.45943 |
| -0.538723938 | 0.909251  | 0.18156  |
| #DIV/0!      | ?         | #DIV/0!  |
| #DIV/0!      | 0.308068  | #DIV/0!  |
| -2.127919557 | 0.583908  | 1.15253  |
| -0.318529518 | 0.886719  | 0.21459  |
| #NUM!        | 0.450185  | -0.58496 |
| 0.021824827  | 0.973287  | 0.05814  |
| -0.56919026  | 0.612668  | 0.24525  |
| -0.555618539 | 0.897468  | 0.1381   |
| 16.83681729  | 1         | 0.0858   |
| -0.222392421 | 0.738921  | 0.51457  |
| -0.966052668 | 0.802979  | -0.17315 |
| #DIV/0!      | ?         | #DIV/0!  |
| #DIV/0!      | ?         | #DIV/0!  |
| #DIV/0!      | 1         | #DIV/0!  |
| #NUM!        | ?         | -4.56709 |
| -0.960952483 | 0.538964  | 0.36779  |
| #NUM!        | 0.556222  | 1.26518  |
| 0            | 0.513713  | 1.58496  |
| -0.59724083  | 1         | 0        |
| -1           | 0.651448  | -1       |
| 0.387021426  | 0.892775  | 0.29956  |
| 1.584962501  | 0.513713  | 1.58496  |
| -1.212993723 | 0.826062  | -0.3505  |
| -1.014517808 | 0.934028  | -0.0278  |
| -0.539630325 | 0.707786  | -0.85884 |
| -0.497495832 | 0.805535  | -0.38929 |
| #DIV/0!      | 0.450185  | #DIV/0!  |
| -1.254274863 | 0.757017  | -0.46105 |
| -0.185111405 | 0.974058  | -0.06173 |
| -2.848249809 | 0.489242  | 0.98701  |

|              |           |          |
|--------------|-----------|----------|
| -1.321928095 | 0.834708  | -0.32193 |
| -29.70024895 | 0.0153282 | -0.58388 |
| #NUM!        | 0.15041   | -3.16993 |
| -1           | 0.710482  | -0.67807 |
| -0.204989375 | 0.866076  | -0.32268 |
| -1           | 1         | 0        |
| 0.485426827  | 0.800451  | 0.34104  |
| 0.2255597    | 0.903964  | 0.16746  |
| #DIV/0!      | ?         | #DIV/0!  |
| -0.20663835  | 0.908593  | 0.14038  |
| 0.374025783  | 0.876104  | 0.27056  |
| -0.887789    | 0.990858  | -0.00617 |
| -0.169925001 | 0.523358  | 0.91754  |
| -1.222392421 | 0.770719  | -0.48543 |
| -1.045737575 | 0.731044  | -0.18376 |
| -0.29701867  | 0.859434  | -0.14854 |
| #DIV/0!      | ?         | #DIV/0!  |
| -2.283520047 | 0.118358  | -0.98853 |
| -0.29701867  | 0.859434  | -0.14854 |
| -2.280107919 | 0.919467  | -0.18057 |
| -1           | 0.844063  | 0.37851  |
| -0.238159737 | 0.801338  | 0.35908  |
| -1.083651531 | 0.149902  | -0.69505 |
| #NUM!        | 0.818083  | -0.42551 |
| -2.220198208 | 0.852262  | 0.26961  |
| -2.017640237 | 0.770377  | -0.25275 |
| -0.176877762 | 0.954867  | 0.10692  |
| -0.406878976 | 0.822309  | 0.21497  |
| -1.834738492 | 0.483288  | -0.5506  |
| -1.273018494 | 0.387571  | -1.39855 |
| -0.238159737 | 0.989297  | 0.02333  |
| -2           | 0.630057  | -1       |
| 0.277812461  | 0.876722  | 0.24293  |
| 0.302698623  | 0.765328  | 0.44242  |
| -0.485426827 | 0.878232  | -0.22239 |
| -0.777607579 | 0.867429  | 0.18057  |
| #DIV/0!      | ?         | #DIV/0!  |
| -1.027876392 | 0.98039   | 0.01293  |
| -0.976541027 | 0.933676  | -0.12338 |
| 0.362570079  | 0.628092  | 0.65208  |
| 0.035135862  | 0.919602  | 0.1296   |
| #DIV/0!      | ?         | #DIV/0!  |
| -0.434937057 | 0.582661  | 0.38003  |
| #DIV/0!      | ?         | #DIV/0!  |
| -1.453547062 | 0.122455  | -0.8192  |
| -0.556511962 | 0.958405  | -0.0713  |
| #DIV/0!      | ?         | #DIV/0!  |
| -0.811414469 | 0.901676  | -0.09514 |
| -0.652076697 | 0.908324  | -0.2115  |
| 0.893084796  | 0.821423  | -0.48543 |
| -0.106915204 | 0.834882  | 0.36257  |
| -0.574086403 | 0.93897   | -0.07654 |
| 1.303011195  | 0.867105  | 0.44568  |
| #DIV/0!      | ?         | #DIV/0!  |
| -0.08979667  | 0.732609  | 0.63387  |
| #DIV/0!      | ?         | #DIV/0!  |



|              |          |          |
|--------------|----------|----------|
| -0.263034406 | 0.345547 | 1.22239  |
| 1            | 0.481309 | 2        |
| -0.362570079 | 0.855514 | 0.152    |
| -2.807354922 | 0.465798 | -1.80735 |
| -1           | 1        | 0        |
| 0.104108403  | 0.889642 | 0.20121  |
| -0.276840205 | 0.900393 | 0.17247  |
| -0.180266946 | 0.980004 | 0.04509  |
| -0.566148191 | 0.743319 | -0.44402 |
| -0.281249607 | 0.457052 | -1.15974 |
| -0.07809114  | 0.988756 | 0.02316  |
| -1.045323991 | 0.887511 | -0.08579 |
| #DIV/0!      | ?        | #DIV/0!  |
| -1.115347653 | 0.602787 | -0.53491 |
| -0.874469118 | 0.361062 | #NUM!    |
| 0            | 0.827931 | 0.19841  |
| -0.041222663 | 0.950703 | 0.09818  |
| -0.47727362  | 0.950269 | -0.10153 |
| -0.514573173 | 0.791627 | -0.51457 |
| -0.094327383 | 0.710346 | -0.4458  |
| -0.028569152 | 0.896953 | 0.08246  |
| -0.534268    | 0.995316 | -0.00796 |
| -1.104002666 | 0.95922  | -0.05781 |
| -0.312690476 | 0.936268 | 0.12314  |
| -0.250749047 | 0.976529 | -0.04075 |
| -0.415898039 | 0.941659 | -0.09328 |
| -0.365905792 | 0.964599 | -0.06823 |
| -0.173997317 | 0.980493 | 0.04516  |
| -1.562885635 | 0.801303 | -0.40138 |
| -0.74977337  | 0.651723 | -0.81558 |
| -1.924272674 | 0.342448 | -2.36875 |
| -0.428603629 | 0.815279 | -0.41192 |
| -0.360645202 | 0.930389 | 0.12684  |
| 0.387023123  | 0.548101 | 1.25376  |
| -0.288639222 | 0.940705 | 0.07234  |
| 1.141832694  | 0.541051 | 1.26601  |
| 0.499729326  | 0.7958   | 0.39378  |
| -0.221974309 | 0.97568  | -0.05237 |
| -0.511933291 | 0.911854 | -0.16232 |
| -0.356161442 | 0.995903 | -0.00618 |
| -0.7109083   | 0.821652 | -0.39754 |
| -0.267194543 | 0.923284 | 0.1665   |
| -0.186815999 | 0.910434 | 0.19246  |
| -0.514162667 | 0.867411 | -0.28    |
| -0.192645078 | 0.914417 | -0.19265 |
| -0.323104599 | 0.72551  | -0.61919 |
| #DIV/0!      | 1        | #DIV/0!  |
| -0.303281173 | 0.863705 | -0.34143 |
| -0.657668946 | 0.832928 | -0.35782 |
| -0.993242634 | 0.887719 | -0.14225 |
| -1.392317423 | 0.587461 | -0.6644  |
| -0.628031223 | 0.986503 | -0.02137 |
| -0.108816357 | 0.885501 | -0.27391 |
| -0.340819333 | 0.920577 | -0.18428 |
| -0.645486027 | 0.930643 | -0.15425 |
| -2.099535674 | 0.449552 | -1.90689 |

|              |          |          |
|--------------|----------|----------|
| -0.811390435 | 0.975093 | -0.03536 |
| -1.641333041 | 0.825557 | -0.34898 |
| -0.217419101 | 0.833235 | -0.37329 |
| -0.201633861 | 0.995035 | -0.00994 |
| -2.37030509  | 0.478964 | -1.32255 |
| -0.268428264 | 0.968102 | -0.0727  |
| -0.257157839 | 0.890295 | -0.23559 |
| 2.169925001  | 0.697543 | 1.41504  |
| 2.321928095  | 0.393741 | 2.58496  |
| -2.807354922 | 1        | 0        |
| -0.432959407 | 1        | 0        |
| -0.896992135 | 0.721421 | 0.43668  |
| -0.1792613   | 0.976561 | -0.05144 |
| 0.476486184  | 0.90754  | 0.25299  |
| 0.245592098  | 0.960278 | -0.10475 |
| 0.174978229  | 0.837157 | 0.28813  |
| -0.325186416 | 0.914343 | -0.18539 |
| -0.443780763 | 0.642637 | -1.01379 |
| -0.071610587 | 0.935979 | -0.15155 |
| -0.222392421 | 0.898432 | -0.25126 |
| -0.982290517 | 0.777051 | -0.46649 |
| -0.075043711 | 0.887617 | 0.17007  |
| -0.593392938 | 0.941534 | -0.10341 |
| -0.504751621 | 0.983509 | 0.02183  |
| 0.120338658  | 0.982077 | 0.03728  |
| #DIV/0!      | 0.308068 | #DIV/0!  |
| -0.40730185  | 0.987699 | 0.02308  |
| #DIV/0!      | ?        | #DIV/0!  |
| -0.772048053 | 0.933601 | -0.12199 |
| 0.104579763  | 0.783785 | 0.46489  |
| 0.096023289  | 0.863504 | 0.20498  |
| -0.415037499 | 0.399441 | #NUM!    |
| 0.127615864  | 0.78544  | 0.36627  |
| #NUM!        | 0.308068 | #NUM!    |
| -0.955253617 | 0.684113 | -0.20523 |
| -0.482392767 | 0.850967 | -0.24793 |
| #DIV/0!      | ?        | #DIV/0!  |
| -0.183050796 | 0.986045 | 0.02295  |
| #DIV/0!      | ?        | #DIV/0!  |
| -0.704935335 | 0.896904 | -0.21853 |
| -1.416895445 | 0.628644 | -0.90828 |
| 0.346802764  | 0.961132 | 0.09849  |
| -0.580502853 | 0.88024  | -0.2693  |
| -0.074853995 | 0.952606 | 0.09412  |
| -0.822173893 | 0.943247 | -0.12542 |
| 0.19592021   | 0.968276 | -0.05344 |
| -0.457122901 | 0.980711 | -0.03145 |
| -0.295689768 | 0.920067 | 0.14072  |
| -0.599892661 | 0.97373  | 0.0332   |
| -1.547487795 | 0.745028 | -0.60407 |
| 0.210398387  | 0.954754 | -0.10139 |
| 0.163498732  | 0.896045 | -0.20645 |
| -0.793031302 | 0.988538 | 0.01681  |
| 0.116458977  | 0.909373 | -0.15484 |
| -0.30256277  | 0.930011 | 0.13829  |
| -0.11561685  | 0.893148 | -0.24759 |

|              |          |          |
|--------------|----------|----------|
| -0.823122238 | 0.891877 | 0.12749  |
| -0.175571565 | 0.932293 | 0.1565   |
| -0.128897733 | 0.989415 | 0.02041  |
| -0.580263164 | 0.894698 | -0.22632 |
| -0.261970372 | 0.954527 | 0.06666  |
| 0.960471636  | 0.829083 | 0.36881  |
| -1.114873958 | 0.914853 | -0.07619 |
| 0.608809243  | 0.695385 | 0.53605  |
| -1.86913112  | 0.884386 | -0.24269 |
| -0.665580961 | 0.962549 | 0.0614   |
| -0.772194748 | 0.448483 | -0.87837 |
| -0.508902209 | 0.891665 | -0.24019 |
| -0.745673416 | 0.857763 | -0.30781 |
| -0.091192565 | 0.930599 | -0.16761 |
| -0.100233839 | 0.969252 | -0.06821 |
| -3.169925001 | 0.568955 | -0.848   |
| -0.515049231 | 0.93572  | -0.12523 |
| 0.2410081    | 0.721758 | -0.87447 |
| -0.777270303 | 0.815003 | -0.39084 |
| 0.660650955  | 0.982996 | 0.0414   |
| 0.690979389  | 0.967504 | 0.09134  |
| -0.819427754 | 1        | 0        |
| -1.216885945 | 0.725328 | 0.58754  |
| -0.430199866 | 0.891957 | 0.2205   |
| -1.310165153 | 0.810005 | 0.38944  |
| -1.941106311 | 0.84795  | -0.26303 |
| 0.134576022  | 0.771097 | 0.50089  |
| -0.50316841  | 0.925186 | 0.11054  |
| -1.648527629 | 0.936257 | 0.1307   |
| -2.108706259 | 0.547406 | -1.02938 |
| 0.250137412  | 0.706592 | 0.67544  |
| -0.689831619 | 0.970109 | 0.04816  |
| 3.459431619  | 0.57998  | 2.58496  |
| -0.607682577 | 0.891416 | 0.20945  |
| -0.371966606 | 0.978332 | -0.03901 |
| -1.954044864 | 0.787685 | -0.4035  |
| -0.534085853 | 0.956663 | -0.06636 |
| -1.032032349 | 0.868039 | -0.07468 |
| -0.676502905 | 0.814485 | -0.12453 |
| -0.695214189 | 0.950906 | -0.0909  |
| -0.672918395 | 0.741497 | -0.3073  |
| -0.242884081 | 0.919276 | 0.13154  |
| -0.674420024 | 0.977984 | -0.03996 |
| -0.118913493 | 0.714031 | 0.28426  |
| -0.683055313 | 0.875211 | 0.10838  |
| -0.450301081 | 0.971776 | -0.0328  |
| -0.342069627 | 0.887757 | 0.15523  |
| -0.390647732 | 0.950204 | 0.07017  |
| -0.507295174 | 0.935156 | -0.09759 |
| -1.058558529 | 0.928735 | -0.10251 |
| -0.680760993 | 0.856475 | -0.20483 |
| -0.766594537 | 0.702387 | -0.68108 |
| -0.77675618  | 0.767119 | -0.47316 |
| -0.5360529   | 0.938335 | -0.10309 |
| -0.463910549 | 0.985652 | -0.02278 |
| -1.51316115  | 0.70382  | -0.69154 |

|              |          |          |
|--------------|----------|----------|
| -0.314959725 | 0.939475 | -0.13048 |
| -0.12324022  | 0.935996 | 0.10183  |
| -0.383373541 | 0.905502 | 0.15644  |
| -0.29449879  | 0.937513 | 0.10603  |
| -0.09224236  | 0.908401 | 0.17038  |
| -2.028797264 | 0.430778 | -1.17242 |
| -0.861394762 | 0.888202 | -0.22948 |
| -1.005255725 | 0.832875 | -0.3351  |
| 0.226765516  | 0.896449 | 0.16219  |
| -0.790566056 | 0.717221 | -0.28977 |
| 0.34648907   | 0.982635 | -0.04838 |
| -0.772194082 | 0.792918 | -0.22556 |
| -0.584962501 | 1        | 0        |
| -0.274297269 | 0.958148 | -0.06545 |
| -0.91753784  | 0.8855   | -0.22948 |
| -0.042012479 | 0.988642 | 0.02163  |
| -1.455153549 | 0.817127 | -0.26719 |
| #DIV/0!      | ?        | #DIV/0!  |
| 0.373327247  | 0.680244 | 0.45194  |
| 0.171588051  | 0.577123 | 0.60151  |
| -0.71648605  | 0.96696  | -0.04659 |
| -0.408896496 | 0.993118 | 0.00789  |
| -0.275453665 | 0.989612 | -0.01612 |
| -0.872777656 | 0.852528 | -0.09935 |
| -0.928446739 | 0.697591 | -0.71272 |
| -0.450979645 | 0.969466 | -0.05015 |
| 0.056143078  | 0.911845 | 0.16227  |
| -0.862059561 | 0.912868 | 0.12016  |
| -0.360960827 | 0.927633 | -0.11193 |
| 0.245177741  | 0.801304 | 0.41373  |
| 0.012819292  | 0.998438 | -0.00376 |
| 0.156119202  | 0.893132 | -0.2713  |
| -0.355094959 | 0.983173 | -0.02647 |
| -0.506731298 | 0.971807 | 0.04161  |
| 0.193685308  | 0.91259  | 0.14859  |
| -0.612408383 | 0.97382  | -0.04458 |
| -0.08735248  | 0.591849 | 0.64886  |
| -0.289506617 | 0.881931 | 0.20484  |
| -0.24079254  | 0.944185 | -0.06494 |
| -0.41789614  | 0.987162 | -0.02097 |
| -1.958913696 | 0.889637 | 0.16887  |
| -2.261637532 | 0.473631 | -0.83151 |
| -0.302847353 | 0.965133 | -0.07895 |
| 0.123735368  | 0.93145  | -0.17127 |
| -0.826579123 | 0.946058 | -0.11471 |
| -0.56416874  | 0.967054 | -0.0495  |
| -0.678014871 | 0.985987 | -0.01116 |
| -0.392317423 | 0.960252 | 0.05614  |
| -0.36860264  | 0.983664 | 0.02208  |
| -0.312384322 | 0.944837 | 0.11532  |
| #DIV/0!      | 0.993464 | #DIV/0!  |
| -0.185750523 | 0.883568 | 0.1766   |
| 1.584962501  | 0.468351 | 2.32193  |
| -0.240603609 | 0.540378 | 0.98793  |
| -0.476574312 | 0.799715 | 0.20422  |
| -0.313975971 | 0.859426 | 0.24327  |

|              |          |          |
|--------------|----------|----------|
| -0.15238572  | 0.77785  | 0.40033  |
| -1.149752412 | 0.616132 | -0.77764 |
| -0.314364801 | 0.974702 | 0.05395  |
| -0.104877123 | 0.985428 | -0.03382 |
| -0.551361321 | 0.525114 | 0.32197  |
| -0.389330439 | 0.855737 | -0.23282 |
| -0.146220741 | 0.861824 | 0.28317  |
| -0.428048074 | 0.922253 | 0.10454  |
| -1.807354922 | 0.582476 | -1.07039 |
| 0.08305574   | 0.913267 | 0.152    |
| 0.209992322  | 0.856152 | 0.15134  |
| -0.361077379 | 0.935879 | 0.0955   |
| -0.569407687 | 0.92086  | -0.17286 |
| -1.748020783 | 0.713427 | -0.50986 |
| -0.5360529   | 0.830028 | -0.33442 |
| -0.161736124 | 0.996125 | 0.00879  |
| -0.196927346 | 0.995333 | 0.01044  |
| -0.139136091 | 0.957543 | 0.09129  |
| -0.75802721  | 0.690607 | -0.7794  |
| -0.205939387 | 0.978211 | -0.04732 |
| -0.582305415 | 0.945032 | -0.11316 |
| -0.633659063 | 0.860266 | 0.26586  |
| -0.359649643 | 0.829927 | -0.40409 |
| -0.424798241 | 0.950858 | -0.08482 |
| 0.176383942  | 0.872204 | 0.24562  |
| -0.392835535 | 0.976353 | -0.04045 |
| 0.202147533  | 0.948755 | 0.12051  |
| -0.225619206 | 0.972429 | 0.0544   |
| -0.991826069 | 0.893283 | 0.18623  |
| -0.640111337 | 0.863442 | 0.11085  |
| -0.450277099 | 0.889632 | -0.20944 |
| -1.466983446 | 0.930798 | -0.10403 |
| -0.115477217 | 0.721372 | 0.59549  |
| -1.514541645 | 0.936891 | -0.13453 |
| -1.676128771 | 0.909097 | -0.18663 |
| -0.522739986 | 0.909628 | 0.11935  |
| -0.612976877 | 0.729249 | -0.35466 |
| -1.468645034 | 0.958276 | -0.08073 |
| -0.509861045 | 0.944076 | -0.09031 |
| -0.980430363 | 0.769269 | -0.30494 |
| -0.589168032 | 0.981915 | -0.02989 |
| -0.478379325 | 0.990807 | 0.0148   |
| -0.795853635 | 0.812554 | -0.2112  |
| -0.757995449 | 0.84382  | -0.32139 |
| -1.049652625 | 0.832841 | -0.3416  |
| -0.418612668 | 0.962069 | -0.081   |
| 0.68182404   | 0.784472 | -0.67807 |
| -0.269677009 | 0.96575  | 0.07231  |
| -0.404823894 | 0.920872 | -0.17281 |
| -0.547261792 | 0.891178 | -0.22946 |
| -0.394032671 | 0.759464 | -0.5551  |
| -0.472193068 | 0.958505 | -0.08025 |
| 0.836501268  | 0.727745 | 0.65208  |
| -1.088225933 | 0.914131 | -0.12436 |
| -0.266909963 | 0.997343 | -0.00475 |
| -0.684895931 | 0.970739 | -0.05977 |

|              |           |          |
|--------------|-----------|----------|
| -0.35683371  | 0.933     | -0.12891 |
| -1.450136753 | 0.839503  | 0.29632  |
| 0.300329824  | 0.942099  | 0.13322  |
| -0.596281716 | 0.822468  | 0.20652  |
| -0.416019927 | 0.958583  | 0.08208  |
| -0.621724768 | 0.943775  | 0.10301  |
| -0.031026896 | 0.985336  | 0.03037  |
| -0.583724441 | 0.945208  | -0.11033 |
| -1.635992519 | 0.897787  | 0.16377  |
| -0.298690624 | 0.90994   | 0.13153  |
| -0.779340546 | 0.860588  | 0.20321  |
| 0.740732424  | 0.714352  | 0.56066  |
| -0.406128891 | 0.982711  | -0.0311  |
| -0.160611071 | 0.969229  | -0.06588 |
| -0.54903508  | 0.998826  | 0.00191  |
| 0.964621276  | 0.702085  | 0.76196  |
| -0.062206423 | 0.924104  | 0.13991  |
| -0.387591919 | 0.82014   | 0.24775  |
| -0.644312323 | 0.977782  | -0.04542 |
| -0.369276233 | 0.905977  | -0.20067 |
| -0.372290513 | 0.973117  | -0.04782 |
| -0.005586927 | 0.850236  | 0.25086  |
| -0.48009141  | 0.969301  | -0.05447 |
| -0.488034423 | 0.890292  | -0.21913 |
| -0.525351304 | 0.91095   | -0.20866 |
| -0.667442736 | 0.992211  | 0.01017  |
| -0.758551465 | 0.992868  | 0.01197  |
| -1.312436646 | 0.781772  | 0.4745   |
| -0.413227829 | 0.999401  | 0.00078  |
| -0.953829819 | 0.918745  | -0.1481  |
| -3.129283017 | 0.649871  | -0.48543 |
| -0.618593279 | 0.882789  | -0.19677 |
| -2.678071905 | 0.0659319 | -0.91254 |
| -0.447722539 | 0.999071  | -0.00161 |
| -0.422664099 | 0.9538    | -0.08586 |
| -0.284863771 | 0.922826  | -0.16685 |
| -0.891517074 | 0.9123    | -0.09153 |
| -1.459431619 | 0.331841  | -0.65208 |
| -0.223724194 | 0.995691  | 0.00713  |
| -0.531336808 | 0.976055  | 0.04436  |
| -0.483099661 | 0.935455  | -0.13325 |
| -0.558103041 | 0.867634  | -0.19902 |
| -0.167526271 | 0.958783  | 0.05975  |
| #DIV/0!      | ?         | #DIV/0!  |
| 0.834576391  | 0.908814  | 0.28293  |
| -0.777607579 | 0.639681  | -0.922   |
| -0.814485746 | 0.946595  | -0.11517 |
| -0.207316084 | 0.850932  | 0.26824  |
| -0.133142212 | 0.951773  | -0.11912 |
| -0.520715577 | 0.934891  | -0.12895 |
| 0.661198087  | 0.852323  | 0.18845  |
| -0.373683861 | 0.984391  | 0.02763  |
| -0.009398698 | 0.865979  | 0.24101  |
| -0.297680549 | 0.899388  | -0.21022 |
| 0.077478753  | 0.93194   | 0.14202  |
| 0.061400545  | 1         | 0        |

|              |          |          |
|--------------|----------|----------|
| 0.854608777  | 0.980428 | 0.0514   |
| -0.404601021 | 0.991818 | -0.01552 |
| -0.382525558 | 0.970657 | -0.05782 |
| -0.200217146 | 0.966375 | -0.06784 |
| -2           | 0.734617 | -0.33015 |
| -0.594361199 | 0.969097 | 0.04998  |
| -0.881326698 | 0.824465 | 0.26386  |
| -0.380374814 | 0.985516 | 0.02503  |
| -0.172171511 | 0.493941 | 0.43163  |
| -0.196121072 | 0.972231 | -0.06488 |
| -0.205286517 | 0.88004  | 0.1687   |
| -1.934112064 | 0.749204 | -0.53201 |
| -0.215977582 | 0.905302 | -0.17766 |
| -0.479178497 | 0.948761 | -0.10848 |
| -0.130396637 | 0.988723 | 0.02063  |
| -0.433382623 | 0.975425 | 0.05243  |
| 0.234698079  | 0.768213 | 0.4721   |
| 0.022816821  | 0.989336 | -0.02588 |
| #NUM!        | 0.308068 | #NUM!    |
| -0.797507136 | 0.852183 | -0.29097 |
| -0.199659482 | 0.943084 | -0.12909 |
| -0.058465455 | 0.959583 | 0.08375  |
| -0.545161493 | 0.976389 | -0.04439 |
| -2.444784843 | 0.225693 | -0.94228 |
| #DIV/0!      | ?        | #DIV/0!  |
| -2           | 0.935472 | -0.12553 |
| -0.547487795 | 0.897841 | -0.16046 |
| -0.303196744 | 0.922288 | -0.13526 |
| -0.464089652 | 0.933739 | 0.0856   |
| -0.397914695 | 0.971006 | 0.05346  |
| -0.328852253 | 1        | 0        |
| -0.30533548  | 0.920136 | 0.13391  |
| -0.444138619 | 0.99581  | 0.00663  |
| -0.601567408 | 0.715031 | -0.73189 |
| -0.814268196 | 0.943213 | -0.11148 |
| -1.977898708 | 0.973108 | -0.05036 |
| -0.156737323 | 0.924772 | -0.13718 |
| 0            | 1        | 0        |
| -0.485255675 | 0.990671 | -0.0135  |
| -0.556439955 | 0.816845 | -0.38204 |
| -0.58878928  | 0.887418 | -0.1673  |
| -0.694974624 | 0.854785 | -0.22428 |
| -0.440730242 | 0.946203 | -0.11609 |
| -0.633097589 | 0.898744 | -0.18444 |
| -0.781770429 | 0.838656 | -0.18085 |
| -0.533447321 | 0.943415 | -0.08675 |
| -0.306149437 | 0.970637 | -0.05662 |
| -0.557157337 | 0.960537 | -0.05398 |
| -0.353159733 | 0.921265 | 0.14651  |
| -0.749593202 | 0.557857 | -1.1281  |
| -0.699133521 | 0.896191 | -0.16601 |
| -0.308995862 | 0.958302 | 0.06864  |
| -0.778849473 | 0.948906 | -0.05432 |
| 0.173926932  | 0.786364 | 0.38543  |
| 0.270089163  | 0.882437 | -0.33258 |
| -0.743892721 | 0.913417 | -0.09526 |

|              |          |          |
|--------------|----------|----------|
| -0.449699933 | 0.928123 | -0.118   |
| 0.856767116  | 0.679513 | 0.69724  |
| -0.180502262 | 0.998739 | -0.00222 |
| -2.380127862 | 0.90659  | -0.20079 |
| 0.12565026   | 0.817381 | 0.4039   |
| -0.442996761 | 0.870441 | 0.16359  |
| -0.382857094 | 0.796183 | -0.41143 |
| -0.742503778 | 0.88202  | 0.10649  |
| -0.26484615  | 0.732235 | 0.17935  |
| -0.08431416  | 0.963007 | -0.07702 |
| -0.318103887 | 0.927307 | -0.15656 |
| -0.176123572 | 0.899062 | -0.24452 |
| -0.498920054 | 0.915113 | -0.19423 |
| -0.329751304 | 0.845496 | 0.21062  |
| -0.603980639 | 0.988734 | 0.01653  |
| -0.477597965 | 0.942667 | 0.07991  |
| 0.151123803  | 0.961401 | 0.09462  |
| -0.742246477 | 0.781789 | -0.24034 |
| -0.592813457 | 0.904809 | -0.21522 |
| -0.481810482 | 0.835802 | 0.14724  |
| -0.446350835 | 0.951733 | -0.09622 |
| -0.181606806 | 0.948069 | 0.12004  |
| -0.33825023  | 0.952587 | -0.10975 |
| -0.254998531 | 0.996353 | -0.00869 |
| -0.343033728 | 0.9533   | -0.10278 |
| -0.362852435 | 0.972192 | -0.053   |
| -0.318515933 | 0.919746 | 0.12369  |
| -0.495616794 | 0.996747 | 0.00476  |
| -0.610970911 | 0.947323 | 0.05834  |
| -0.691950814 | 0.951823 | -0.03495 |
| -0.757917641 | 0.678411 | 0.22982  |
| -0.484480018 | 0.948155 | 0.07732  |
| -0.274524201 | 0.945655 | -0.10826 |
| -0.480518848 | 0.992941 | -0.01161 |
| -0.371968777 | 0.948563 | -0.10188 |
| -0.570849764 | 0.964764 | 0.03733  |
| -0.776482738 | 0.947621 | -0.05874 |
| -0.111790825 | 0.799887 | 0.19059  |
| -0.298302257 | 0.918345 | 0.1222   |
| -0.401534955 | 0.948416 | 0.06178  |
| -0.364992053 | 0.840335 | 0.22508  |
| -0.274647591 | 0.823567 | 0.2531   |
| -0.184637499 | 0.781049 | 0.23206  |
| -0.288080324 | 0.874783 | 0.14169  |
| -0.049817467 | 0.997012 | -0.00675 |
| -0.652076697 | 0.764931 | -0.1375  |
| -0.475959684 | 0.750886 | 0.19677  |
| -0.111508315 | 0.926892 | 0.16506  |
| -0.417396772 | 0.984577 | -0.03218 |
| 0.20461772   | 0.874478 | -0.34667 |
| 0.329375652  | 0.942231 | 0.13119  |
| -0.730486159 | 0.939285 | -0.11744 |
| -0.132938832 | 0.919767 | 0.18564  |
| -0.321928095 | 0.986538 | -0.02237 |
| -1.666175463 | 0.467769 | -1.35219 |
| -0.56749796  | 0.9143   | -0.13011 |



|              |          |          |
|--------------|----------|----------|
| -0.528779665 | 0.947606 | -0.08197 |
| -0.474441786 | 0.832928 | -0.2612  |
| -3.121461272 | 0.356138 | -1.32529 |
| -0.152003093 | 0.557784 | 0.76553  |
| 1.247927513  | 0.854445 | 0.36923  |
| #DIV/0!      | 0.450185 | #DIV/0!  |
| 0.359826273  | 0.850505 | 0.31772  |
| -0.82594678  | 0.910987 | -0.15591 |
| -0.573079821 | 0.880415 | -0.20703 |
| -0.22283368  | 0.986643 | -0.01865 |
| -2.000894695 | 0.531652 | -1.14576 |
| -0.337061398 | 0.995744 | 0.00701  |
| -0.612618844 | 0.954774 | 0.05962  |
| -0.415365124 | 0.90723  | 0.12984  |
| -1.043626932 | 0.951798 | -0.03899 |
| -0.810764179 | 0.940012 | 0.06963  |
| -0.468442648 | 0.91564  | 0.11339  |
| -0.481775631 | 0.817717 | 0.1685   |
| -0.691877705 | 0.560488 | -1.07039 |
| -0.430046534 | 0.942259 | 0.09722  |
| -0.241098212 | 0.999172 | -0.00149 |
| 0.11284147   | 0.948964 | 0.09005  |
| -0.227196072 | 0.947498 | 0.07476  |
| -0.534396584 | 0.962766 | -0.06239 |
| -0.300866479 | 0.923949 | -0.12135 |
| -0.234829525 | 0.767878 | 0.23779  |
| -0.495810123 | 0.984267 | 0.02846  |
| -0.151146132 | 0.777225 | 0.26303  |
| -0.267899683 | 0.967475 | 0.04914  |
| -0.430694094 | 0.861014 | -0.14743 |
| -0.290429942 | 0.914896 | 0.1263   |
| -0.226865898 | 0.958763 | -0.0686  |
| -0.214258341 | 0.842739 | 0.18739  |
| -0.020952371 | 0.896583 | 0.18781  |
| -0.30561205  | 0.989917 | 0.01025  |
| 0.019763255  | 0.956577 | -0.09245 |
| 0.002947284  | 0.93798  | 0.11684  |
| -0.367864379 | 0.909239 | 0.18434  |
| -0.575160164 | 0.944    | -0.071   |
| -0.69653964  | 0.947803 | 0.07881  |
| -0.529895036 | 0.494751 | 0.35651  |
| -0.474139204 | 0.952442 | -0.08813 |
| 0.556765609  | 0.969121 | 0.0726   |
| -1.857980995 | 0.843376 | -0.21412 |
| -0.427550111 | 0.919024 | 0.13092  |
| -0.786677506 | 0.860655 | -0.20047 |
| -0.225401347 | 0.932375 | -0.14554 |
| -0.464036325 | 0.974805 | 0.05092  |
| -0.521243154 | 0.9511   | -0.09884 |
| -0.058893689 | 0.888077 | -0.32193 |
| -0.396071618 | 0.970224 | 0.04565  |
| -0.221180989 | 0.905705 | 0.15824  |
| -0.303225904 | 0.95684  | -0.08711 |
| -0.203591223 | 0.998532 | 0.00191  |
| -0.591251313 | 0.99458  | -0.00702 |
| -0.906890596 | 0.842747 | -0.32193 |

|              |           |          |
|--------------|-----------|----------|
| -0.555996222 | 0.850083  | -0.28115 |
| -0.485110079 | 0.974529  | 0.03003  |
| -0.495372249 | 0.928384  | 0.14351  |
| 0.011825435  | 0.760821  | 0.49304  |
| -0.452248578 | 0.853191  | -0.3213  |
| -0.330625847 | 0.962541  | -0.06571 |
| -0.282323577 | 0.954334  | -0.10974 |
| -0.445493761 | 0.954288  | 0.09498  |
| 0.505934255  | 0.699487  | 0.75044  |
| -0.283317127 | 0.799382  | 0.37299  |
| -0.236352363 | 0.757213  | 0.38344  |
| -0.491109533 | 0.793123  | -0.51769 |
| -1.151059071 | 0.693367  | 0.5991   |
| -0.234292189 | 0.996803  | 0.00661  |
| -1.018464063 | 0.911016  | -0.16784 |
| -0.283693876 | 0.916464  | -0.07484 |
| 0.362570079  | 0.245614  | 0.48332  |
| -0.598756884 | 0.992827  | -0.00983 |
| -0.230073704 | 0.97986   | 0.02852  |
| 0.624490865  | 0.853384  | -0.33703 |
| -0.741327491 | 0.9056    | -0.08107 |
| -0.364827697 | 0.974151  | -0.0572  |
| -0.591595164 | 0.854284  | -0.2962  |
| -0.307084179 | 0.976284  | -0.04598 |
| -0.152724261 | 0.98974   | 0.01934  |
| 0.191224403  | 0.938901  | -0.14319 |
| -0.268365163 | 0.844897  | -0.38986 |
| 0.584962501  | 0.833456  | 0.45943  |
| -0.365921003 | 0.897288  | 0.19383  |
| -0.348814268 | 0.966145  | 0.06466  |
| -0.664333309 | 0.95779   | -0.04748 |
| -0.554167613 | 0.843014  | -0.33842 |
| -1.385805451 | 0.492015  | -0.39423 |
| -0.216292222 | 0.986305  | -0.02822 |
| -0.220529677 | 0.944497  | 0.11437  |
| -0.245287699 | 0.968984  | -0.0585  |
| -0.496036959 | 0.929663  | -0.04568 |
| -0.459464373 | 0.932235  | -0.1152  |
| 0.033386168  | 0.909395  | -0.24672 |
| -0.279923288 | 0.961333  | -0.07189 |
| -0.568034233 | 0.261541  | 0.51176  |
| -0.408199237 | 0.961376  | 0.078    |
| -0.206965942 | 0.957531  | 0.075    |
| -0.239003237 | 0.980508  | 0.03294  |
| -0.423132803 | 0.805306  | -0.44181 |
| -0.557872277 | 0.956487  | -0.05729 |
| -0.506561139 | 0.878236  | 0.13142  |
| -0.352837678 | 0.932722  | -0.14125 |
| -0.197806783 | 0.976154  | -0.04116 |
| -0.408849992 | 0.826848  | -0.36832 |
| 0            | 0.0869754 | 0.88897  |
| -0.609230441 | 0.853594  | -0.17586 |
| -0.396677934 | 0.981609  | -0.03411 |
| -0.609713231 | 0.976443  | -0.04598 |
| -0.303126897 | 0.895896  | -0.25027 |
| -0.439815602 | 0.898881  | -0.19944 |

|              |            |          |
|--------------|------------|----------|
| -0.450661409 | 0.87251    | 0.23341  |
| 0.045925205  | 0.736254   | 0.45151  |
| -0.322564625 | 0.986036   | 0.02411  |
| -0.21772789  | 0.928205   | 0.11342  |
| -0.300899372 | 0.939751   | 0.09797  |
| 0.107915339  | 0.966517   | -0.07179 |
| #NUM!        | 1          | 0        |
| -1.415037499 | 0.392404   | -3       |
| -0.493837131 | 0.962273   | -0.07357 |
| -0.414306831 | 0.89813    | 0.161    |
| -0.194012328 | 0.976241   | -0.03999 |
| -0.544078311 | 0.892766   | 0.11379  |
| -0.400099709 | 0.970981   | 0.0526   |
| -0.388672436 | 0.95916    | -0.08495 |
| #NUM!        | 0.00875441 | 1.41504  |
| 0.321928095  | 0.505748   | 1.16993  |
| -0.22371721  | 0.956194   | 0.10777  |
| -0.178863744 | 0.939237   | -0.15308 |
| 0.074438763  | 0.959683   | 0.09558  |
| -0.55158176  | 0.888811   | -0.2474  |
| -0.255125874 | 0.997049   | 0.00609  |
| -0.166203836 | 0.827561   | -0.37841 |
| -0.394717538 | 0.969255   | -0.06451 |
| -0.137811004 | 0.853488   | 0.3088   |
| #NUM!        | 0.308068   | #NUM!    |
| -1.321928095 | 0.698562   | -0.73697 |
| -0.646346323 | 0.97826    | -0.02718 |
| -0.326988812 | 0.963198   | -0.06045 |
| -0.882368276 | 0.812355   | -0.43032 |
| 0.386354745  | 0.776722   | 0.51911  |
| -0.109347396 | 0.992633   | -0.01411 |
| -0.538336341 | 0.97106    | -0.05    |
| -0.308950241 | 0.958143   | 0.08029  |
| -0.262825259 | 0.980932   | -0.03681 |
| -1.219025875 | 0.846702   | -0.21754 |
| -1.676389528 | 0.720111   | -0.39722 |
| -1.208108195 | 0.422241   | -1.5013  |
| -2.255394344 | 0.926699   | -0.12902 |
| -0.478714871 | 0.995348   | 0.00746  |
| -2           | 0.624065   | 1        |
| 0.477202224  | 0.780364   | 0.44399  |
| -0.847996907 | 0.914417   | -0.16993 |
| -0.912747965 | 0.931424   | -0.09775 |
| -0.181452468 | 0.962845   | -0.08604 |
| -1.272525855 | 0.824761   | -0.26445 |
| -0.186874184 | 0.826143   | -0.32751 |
| -0.574236094 | 0.853771   | -0.33817 |
| -0.434618631 | 0.945961   | -0.10904 |
| #NUM!        | 0.838734   | -0.20645 |
| -2.262507009 | 0.469171   | -1.06749 |
| #DIV/0!      | 0.308068   | #DIV/0!  |
| #DIV/0!      | 0.308068   | #DIV/0!  |
| -2.239465935 | 0.882247   | -0.16146 |
| -1.681366985 | 0.610596   | -0.79099 |
| -1.297543936 | 0.745017   | -0.49134 |
| -0.517403137 | 0.958755   | -0.06627 |

|              |          |          |
|--------------|----------|----------|
| -0.485426827 | 0.93695  | -0.12472 |
| -0.27897447  | 0.949008 | 0.06963  |
| 0.07440239   | 0.643716 | 0.45858  |
| -0.727655757 | 0.942555 | 0.09152  |
| -2.165593762 | 0.573612 | -1.18898 |
| -0.39273205  | 0.811194 | 0.22665  |
| -0.811554911 | 0.689641 | -0.81155 |
| -1.659924558 | 0.407472 | -0.5409  |
| -0.454871113 | 0.966733 | 0.05507  |
| -0.301415498 | 0.983318 | -0.03661 |
| -0.415037499 | 0.785272 | -0.52001 |
| -0.107763066 | 0.959571 | -0.08773 |
| -0.37640959  | 0.927407 | 0.08344  |
| -0.671225977 | 0.850121 | -0.12005 |
| -0.180572246 | 0.863254 | 0.24345  |
| 0.087462841  | 0.885865 | 0.24793  |
| -0.456211198 | 0.985847 | 0.02493  |
| -0.191298927 | 0.968628 | -0.06957 |
| -0.333884732 | 0.992204 | -0.01493 |
| -0.280820889 | 0.948619 | -0.10852 |
| -0.23723599  | 0.860928 | 0.19927  |
| 0.450661409  | 0.815909 | 0.26303  |
| -0.334419039 | 0.976624 | -0.03355 |
| -0.616617145 | 0.957481 | -0.04208 |
| 0.298553587  | 0.664492 | 0.30117  |
| -1.736965594 | 0.810902 | -0.152   |
| -0.189372422 | 0.853454 | 0.21379  |
| -0.09156724  | 0.981946 | -0.03712 |
| -0.863346537 | 0.854208 | -0.20561 |
| -0.753160495 | 0.420623 | -2.95247 |
| -0.99734147  | 0.97844  | 0.03006  |
| -0.315833321 | 0.930331 | -0.14772 |
| -0.274174963 | 0.813    | 0.24207  |
| -0.223645305 | 0.887741 | 0.17564  |
| -0.189532466 | 0.934581 | 0.1138   |
| -0.336199853 | 0.988853 | 0.02073  |
| -0.576167615 | 0.897502 | -0.20062 |
| -0.505734258 | 0.906446 | 0.16128  |
| -0.145850866 | 0.906288 | 0.1822   |
| -0.529933847 | 0.976562 | 0.03823  |
| 0.08917051   | 0.691847 | 0.47033  |
| -1.080217783 | 0.966946 | 0.05856  |
| 0.67665123   | 0.891402 | 0.30133  |
| -0.332445967 | 0.909696 | -0.19015 |
| 0.353636955  | 0.973926 | 0.06254  |
| -0.599156382 | 0.925694 | -0.14306 |
| -0.275290384 | 0.987162 | -0.02639 |
| -0.409437352 | 0.917263 | -0.17675 |
| -0.441974535 | 0.953982 | 0.07137  |
| -0.597056679 | 0.974524 | 0.04823  |
| -0.41280712  | 0.795791 | 0.23465  |
| -0.529040056 | 0.891806 | -0.21888 |
| 0.435118168  | 0.958701 | 0.08555  |
| 0.364293043  | 0.906003 | 0.17288  |
| -1.234669889 | 0.964883 | -0.03163 |
| -1.306661338 | 0.720818 | 0.37615  |

|              |          |          |
|--------------|----------|----------|
| -0.502500341 | 0.913442 | -0.13141 |
| -0.313946025 | 0.856284 | -0.30158 |
| -0.253244457 | 0.982617 | -0.03032 |
| -0.029923637 | 0.826482 | 0.30062  |
| -0.512722377 | 0.959305 | 0.05273  |
| -0.361577172 | 0.35688  | 0.55367  |
| -0.57613034  | 0.864267 | 0.16043  |
| -0.529227191 | 0.877838 | 0.11342  |
| -0.749387999 | 0.833878 | 0.08225  |
| -0.273794669 | 0.942138 | 0.08006  |
| -0.490171829 | 0.948856 | 0.05285  |
| -0.673974331 | 0.908802 | 0.07365  |
| -0.567221878 | 0.909041 | 0.07653  |
| -0.800100826 | 0.774016 | -0.13824 |
| -0.646598876 | 0.639258 | 0.31031  |
| -0.457144526 | 0.805402 | 0.2637   |
| -0.897187802 | 0.694147 | -0.15484 |
| -0.59364677  | 0.529    | 0.25597  |
| -0.492608896 | 0.916549 | 0.10365  |
| -0.505264197 | 0.866032 | -0.19431 |
| -0.622122804 | 0.890586 | 0.10256  |
| -0.788357517 | 0.7774   | -0.15027 |
| -0.657239888 | 0.707992 | 0.17475  |
| -0.868801174 | 0.960577 | -0.02188 |
| -0.780964123 | 0.907744 | -0.15022 |
| -0.514573173 | 0.847766 | 0.15895  |
| -0.526032902 | 0.776653 | 0.23859  |
| -0.503631423 | 0.834384 | 0.16237  |
| -0.761614879 | 0.993292 | 0.00591  |
| -0.308502186 | 0.952402 | 0.0768   |
| -0.5334322   | 0.924012 | 0.09072  |
| -0.559116673 | 0.983606 | -0.01982 |
| -0.487435637 | 0.868469 | 0.13216  |
| -0.353418381 | 0.907418 | 0.11346  |
| -0.528953136 | 0.951931 | 0.04828  |
| -0.587616954 | 0.924134 | 0.09796  |
| -0.459170158 | 0.710736 | 0.27415  |
| -0.703903504 | 0.749194 | 0.271    |
| -0.30749694  | 0.773283 | 0.25195  |
| -0.334753697 | 0.628752 | 0.26397  |
| -0.772156281 | 0.791604 | 0.13814  |
| -0.459687257 | 0.75714  | 0.22312  |
| -0.204951973 | 0.759643 | 0.32867  |
| -0.559516013 | 0.90484  | 0.07543  |
| -1.043079011 | 0.514603 | -0.36641 |
| -0.570201123 | 0.536663 | 0.29307  |
| -1.106742407 | 0.817912 | -0.13705 |
| -0.267858247 | 0.893423 | 0.16525  |
| -0.370450603 | 0.912057 | 0.10812  |
| -0.645437499 | 0.84336  | 0.16578  |
| -1.259278084 | 0.309361 | -0.50399 |
| -0.486723486 | 0.859318 | 0.16875  |
| -0.337620957 | 0.836854 | 0.14623  |
| -0.514493199 | 0.87186  | 0.14172  |
| -1.012632335 | 0.84944  | -0.15207 |
| -0.356889932 | 0.740612 | 0.35179  |

|              |           |          |
|--------------|-----------|----------|
| -0.596103058 | 0.564931  | 0.29956  |
| -0.63024338  | 0.936712  | 0.07235  |
| -0.619151187 | 0.858987  | -0.26642 |
| -0.160192369 | 0.749233  | 0.34067  |
| -0.738872272 | 0.967065  | 0.03218  |
| -0.496490355 | 0.952831  | 0.05234  |
| -0.491558939 | 0.606512  | 0.45793  |
| -0.386976417 | 0.957968  | 0.05948  |
| 0.041419927  | 0.843775  | 0.26303  |
| -0.424898038 | 0.988297  | -0.02    |
| -0.415233398 | 0.875912  | 0.15212  |
| -0.295738571 | 0.90605   | 0.14327  |
| -0.36975662  | 0.937858  | -0.12029 |
| -0.464039229 | 0.941349  | 0.04596  |
| -0.146520397 | 0.767521  | -0.63993 |
| -0.29339319  | 0.417741  | 1.02905  |
| #DIV/0!      | 0.0917211 | #DIV/0!  |
| -0.763224809 | 0.806037  | -0.34618 |
| -0.068621946 | 0.978139  | -0.05212 |
| -0.614961572 | 0.90127   | -0.16099 |
| -0.377073425 | 0.958227  | -0.07271 |
| -0.46500999  | 0.984547  | 0.0266   |
| -0.253792978 | 0.856704  | 0.26067  |
| -0.4476636   | 0.925447  | -0.16053 |
| -0.565927377 | 0.939524  | -0.10769 |
| -0.743224585 | 0.753686  | -0.53887 |
| #DIV/0!      | ?         | #DIV/0!  |
| #DIV/0!      | ?         | #DIV/0!  |
| -0.857259828 | 0.874719  | -0.1976  |
| -0.122396631 | 0.946435  | 0.0838   |
| -0.173588059 | 0.798895  | 0.26905  |
| 0.140862536  | 0.666635  | 0.46949  |
| -0.012353428 | 0.971341  | -0.05734 |
| 0.44278917   | 0.98088   | -0.04503 |
| -0.525796631 | 0.991028  | 0.01439  |
| 2.70473613   | 0.934715  | -0.57665 |
| -0.186238787 | 0.454491  | -1.67637 |
| -0.288936548 | 0.937253  | -0.13227 |
| -0.223322173 | 0.89195   | -0.17972 |
| -0.032907472 | 0.996519  | 0.00464  |
| -0.325875279 | 0.917558  | -0.16697 |
| -0.28722036  | 0.932743  | 0.11408  |
| -0.660602125 | 0.820777  | 0.12467  |
| -0.276834189 | 0.997665  | -0.00461 |
| -0.501078602 | 0.936855  | 0.08935  |
| 0.474908955  | 0.843567  | 0.28728  |
| -0.292409008 | 0.903422  | -0.22768 |
| -0.531680818 | 0.94063   | -0.10572 |
| -0.519684783 | 0.891067  | 0.15727  |
| -0.806724511 | 0.618238  | 0.21299  |
| -0.491048473 | 0.893633  | -0.16569 |
| -0.390508401 | 0.93837   | -0.11409 |
| -1.112276815 | 0.969644  | -0.05886 |
| -0.578619763 | 0.996775  | -0.003   |
| -0.327261539 | 0.773453  | 0.3483   |
| -0.346371274 | 0.937021  | 0.10546  |

|              |          |          |
|--------------|----------|----------|
| -0.273083694 | 0.982416 | -0.02844 |
| -0.52007297  | 0.972787 | 0.03452  |
| -0.369433532 | 0.981486 | -0.03231 |
| -0.351074441 | 0.93874  | -0.0807  |
| -0.335207433 | 0.952555 | -0.08718 |
| -0.246539067 | 0.963089 | -0.0762  |
| -0.441377577 | 0.899735 | -0.22775 |
| -0.493622189 | 0.885551 | -0.24244 |
| -0.573654899 | 0.973034 | -0.0375  |
| -0.503828227 | 0.984132 | 0.02714  |
| -0.337653853 | 0.955971 | -0.09439 |
| -0.315590226 | 0.994422 | 0.01099  |
| -0.39382709  | 0.971609 | -0.05429 |
| -0.694145879 | 0.926387 | 0.14129  |
| -0.498038012 | 0.941536 | -0.12359 |
| -0.482154348 | 0.950305 | -0.10287 |
| -0.26459492  | 0.891359 | 0.12206  |
| 1.334419039  | 0.887989 | 0.38333  |
| -0.160464672 | 0.975481 | -0.0581  |
| -0.388245723 | 0.973876 | 0.04623  |
| -0.504119865 | 0.950644 | -0.10471 |
| -0.705267621 | 0.927429 | -0.13206 |
| -0.493960479 | 0.925529 | -0.13587 |
| -0.056341855 | 0.968905 | -0.07171 |
| -0.18328226  | 0.87432  | 0.16864  |
| -0.207276218 | 0.939768 | 0.08715  |
| -0.347580905 | 0.944072 | -0.10648 |
| -0.461989367 | 0.913873 | 0.17191  |
| -0.469697491 | 0.84391  | 0.2807   |
| -0.263034406 | 0.766909 | -0.58496 |
| -0.22744254  | 0.925054 | 0.13827  |
| -1.221243779 | 0.699536 | -0.65245 |
| -1.273765901 | 0.888174 | 0.22129  |
| -0.468853796 | 0.879956 | 0.16215  |
| -0.262489067 | 0.945871 | 0.09371  |
| 0            | 0.973834 | 0.05681  |
| -4.169925001 | 0.262783 | #NUM!    |
| -0.832560248 | 0.905376 | -0.15479 |
| -1.295455884 | 0.599429 | 0.35364  |
| -1.959358016 | 0.57297  | -0.95936 |
| #NUM!        | 0.18169  | 1.58496  |
| #DIV/0!      | ?        | #DIV/0!  |
| -0.733693645 | 0.998869 | -0.0014  |
| -0.36152199  | 0.950247 | 0.06158  |
| -0.258710597 | 0.992757 | 0.0132   |
| -1.102974758 | 0.72063  | 0.46583  |
| -0.914270126 | 0.733347 | -0.61471 |
| -1.36923381  | 0.943021 | -0.04731 |
| -0.34165579  | 0.983181 | 0.02808  |
| -0.464141695 | 0.951715 | -0.08125 |
| -0.606054172 | 0.927885 | -0.09875 |
| -0.969737409 | 0.714149 | -0.18302 |
| -0.258236867 | 0.923024 | -0.12706 |
| 0.087462841  | 0.675723 | -1.19265 |
| -0.377883599 | 0.998765 | -0.0024  |
| 0.12469998   | 0.993054 | -0.01402 |

|              |          |          |
|--------------|----------|----------|
| 0.001924021  | 0.822805 | 0.31266  |
| 0.118548862  | 0.943743 | -0.15236 |
| -0.744785099 | 0.859272 | 0.15652  |
| 0.174498264  | 0.892364 | 0.21135  |
| -0.712590019 | 0.984122 | -0.01856 |
| -0.420575683 | 0.978788 | 0.03279  |
| -0.440572591 | 0.77089  | -0.43452 |
| -0.529767972 | 0.974807 | -0.04452 |
| -0.238159737 | 0.980804 | -0.04244 |
| -0.537882575 | 0.968341 | 0.05429  |
| -2.115477217 | 0.945676 | -0.11548 |
| -2           | 0.450185 | -2       |
| -0.43148802  | 0.735842 | -0.31703 |
| -0.444515312 | 0.789113 | 0.2972   |
| -0.131789873 | 0.751846 | 0.36702  |
| -0.474630009 | 0.982389 | 0.03976  |
| 0.383683067  | 0.779883 | 0.49728  |
| -0.092639001 | 0.962686 | 0.05247  |
| -0.858991713 | 0.826685 | -0.2998  |
| -1.5360529   | 0.714028 | -0.53605 |
| -0.235615448 | 0.987128 | -0.02274 |
| -0.305495199 | 0.98901  | 0.0183   |
| -0.473019506 | 0.432671 | 0.28175  |
| 0.2410081    | 0.656241 | 0.44746  |
| 1.121990524  | 0.834007 | -0.18057 |
| -0.966122235 | 0.585743 | -0.45592 |
| -0.503118422 | 0.934354 | -0.13194 |
| 0.539480141  | 0.951366 | 0.13985  |
| -3.105203285 | 0.926403 | 0.14316  |
| -1.006919414 | 0.965173 | -0.07073 |
| -3.528994279 | 0.858322 | 0.23178  |
| -0.870437534 | 0.837604 | -0.41298 |
| -4.057328959 | 0.910417 | -0.17384 |
| 0.138327292  | 0.900067 | 0.22353  |
| 0.194404865  | 0.894722 | -0.18508 |
| -4.157725265 | 0.998171 | -0.00214 |
| -0.511604795 | 0.890139 | -0.21364 |
| 0.736965594  | 0.231408 | 1.34395  |
| 0.321928095  | 0.254749 | 1.11548  |
| -0.368016277 | 0.850513 | 0.16754  |
| 0.584962501  | 0.83713  | 0.20163  |
| #DIV/0!      | 0.450185 | #DIV/0!  |
| -1.644348964 | 0.593459 | -0.33708 |
| -0.427384018 | 0.945042 | 0.06288  |
| -0.071691106 | 0.951249 | -0.09466 |
| 1.285203493  | 0.796137 | 0.66956  |
| -0.180572246 | 0.490013 | 0.75384  |
| -0.3594028   | 1        | 0        |
| -1.10433666  | 0.82197  | -0.29698 |
| -0.43862432  | 0.909909 | -0.18044 |
| -0.226566322 | 0.982524 | -0.03828 |
| -1.272459419 | 0.991394 | 0.01778  |
| 0.672835257  | 0.764358 | 0.65966  |
| 0.261140534  | 0.938993 | 0.15361  |
| -0.40788721  | 0.872606 | 0.2169   |
| -1.691381791 | 0.424461 | -1.16856 |



|              |          |          |
|--------------|----------|----------|
| -0.466110057 | 0.908156 | -0.19594 |
| -1.83616177  | 0.501131 | -0.7338  |
| -1.461198112 | 0.863578 | -0.26685 |
| -0.410524453 | 0.94425  | -0.10898 |
| -0.119794513 | 0.928505 | -0.1375  |
| 0.208889543  | 0.987518 | -0.02589 |
| -1.408084739 | 0.479636 | -0.69349 |
| -0.543142325 | 0.797177 | 0.34994  |
| 0.801816739  | 0.892291 | 0.26671  |
| -1.112150734 | 0.840292 | -0.31595 |
| -1.473931188 | 0.742829 | -0.39593 |
| -0.688737691 | 0.991249 | -0.01879 |
| 0            | 0.762231 | 0.60407  |
| 0.905051596  | 0.8201   | 0.52556  |
| -0.890756692 | 0.763965 | -0.47826 |
| -0.664425089 | 0.626189 | -1.02405 |
| 0            | 0.703544 | 0.63743  |
| -0.680602703 | 0.95137  | 0.10251  |
| -0.323042744 | 0.9198   | -0.17711 |
| -0.419508978 | 0.815517 | 0.20437  |
| 1.203533394  | 0.977265 | -0.0902  |
| -1.439503462 | 0.974006 | 0.04699  |
| -0.022983318 | 0.906631 | -0.19977 |
| -2.321928095 | 0.31594  | #NUM!    |
| -0.712157802 | 0.899756 | -0.16479 |
| -0.469485283 | 1        | 0        |
| 0.628031223  | 0.961772 | 0.12553  |
| -0.459431619 | 1        | 0        |
| #NUM!        | 0.622002 | -1       |
| #NUM!        | 0.308068 | #NUM!    |
| -0.645335119 | 0.890691 | -0.20282 |
| 0.321928095  | 1        | 0        |
| -0.100800641 | 0.800332 | -0.42986 |
| -0.342724355 | 0.945796 | -0.11694 |
| -0.520772531 | 0.952119 | -0.08287 |
| -0.230549445 | 0.993004 | 0.01539  |
| -2.197083168 | 0.927952 | 0.13737  |
| -1.769468234 | 0.811732 | 0.33473  |
| -0.215407771 | 0.999316 | 0.00111  |
| -0.286823531 | 0.964471 | -0.07087 |
| -0.457279948 | 0.774188 | -0.58712 |
| -0.22090893  | 0.897631 | 0.19931  |
| -0.159102004 | 0.92171  | 0.14749  |
| -0.688824501 | 0.932497 | 0.09864  |
| -0.155465482 | 0.827387 | 0.18932  |
| -0.227514421 | 0.914374 | 0.12247  |
| -0.71874431  | 0.843934 | -0.33683 |
| -0.377524429 | 0.894313 | -0.23019 |
| -0.515099756 | 0.612678 | 0.26568  |
| -0.524488642 | 0.894027 | -0.21254 |
| -0.466781074 | 1        | 0        |
| -0.13438568  | 0.849946 | 0.22437  |
| -0.3398838   | 0.832426 | 0.15568  |
| -0.391816513 | 0.827932 | 0.16979  |
| -1.055853235 | 0.900962 | -0.13887 |
| -0.257157839 | 0.915626 | -0.18845 |

|              |          |          |
|--------------|----------|----------|
| -0.642095994 | 0.839991 | -0.3161  |
| -0.422172945 | 0.785474 | 0.25808  |
| -0.483602075 | 0.417637 | 0.30875  |
| -1.159215057 | 0.784001 | 0.32489  |
| -0.548926754 | 0.980294 | -0.03665 |
| -0.061267938 | 0.951382 | -0.10288 |
| 0.15716504   | 0.926144 | -0.18046 |
| -0.336868115 | 0.990814 | 0.01577  |
| -0.545809807 | 0.937425 | 0.07028  |
| -0.7355816   | 0.933146 | -0.0737  |
| -0.070047498 | 0.9315   | 0.11179  |
| -0.379971814 | 0.982729 | -0.02894 |
| -0.471255927 | 0.979634 | -0.03549 |
| -0.292721041 | 0.940032 | -0.10525 |
| -0.546211789 | 0.956909 | -0.09134 |
| -0.489966001 | 0.979847 | -0.03844 |
| -0.659093144 | 0.946186 | -0.09459 |
| -0.694563385 | 0.889742 | -0.17898 |
| -0.381353863 | 0.921141 | -0.12571 |
| -0.266549353 | 0.901658 | 0.1578   |
| -1.274906427 | 0.884963 | 0.16727  |
| -0.394027791 | 0.993653 | 0.0107   |
| -0.241193948 | 0.933163 | 0.11404  |
| -0.556413256 | 0.973448 | -0.03301 |
| 0.490750431  | 0.9189   | 0.19245  |
| -0.161664668 | 0.797062 | 0.29275  |
| -0.400490512 | 0.909255 | -0.1979  |
| -0.419350492 | 0.952592 | 0.06772  |
| -0.325853798 | 0.995374 | 0.00834  |
| -0.498656769 | 0.780272 | 0.25103  |
| 2.162271429  | 0.508855 | 1.36257  |
| -0.634478741 | 0.935206 | -0.11756 |
| -0.520400174 | 0.909044 | -0.15627 |
| -0.531134564 | 0.79441  | 0.15831  |
| 0.035919574  | 0.918269 | 0.17557  |
| -0.377835902 | 0.974346 | 0.037    |
| -0.98576433  | 0.959088 | 0.07728  |
| -0.092579989 | 0.925648 | 0.17244  |
| -1.030771201 | 0.910676 | 0.19273  |
| -0.352987717 | 0.928497 | -0.15425 |
| -1.100073892 | 0.908983 | -0.17946 |
| -0.12149459  | 0.988743 | 0.02734  |
| -0.994810554 | 0.317761 | -1.41277 |
| -0.415848686 | 0.961769 | 0.0654   |
| -0.32887733  | 0.955253 | -0.08743 |
| 0.23098295   | 0.852321 | 0.29761  |
| -1.077845194 | 0.991422 | 0.01703  |
| -1.397453187 | 0.938353 | -0.11809 |
| -0.673919743 | 0.798995 | 0.39601  |
| -0.763004046 | 0.825238 | -0.34223 |
| -0.464145457 | 0.955106 | -0.07844 |
| -0.547821765 | 0.847812 | -0.31759 |
| -0.729226637 | 0.884116 | -0.15272 |
| -0.544498638 | 0.955764 | -0.07321 |
| -0.582403546 | 0.945805 | 0.04285  |
| -0.288483457 | 0.984882 | 0.02737  |

|              |          |          |
|--------------|----------|----------|
| -0.65979059  | 0.902035 | -0.19586 |
| -0.79970135  | 0.655761 | -0.69661 |
| -0.700439718 | 0.627217 | -0.70044 |
| 0.106915204  | 0.862619 | 0.25376  |
| -0.539618302 | 0.891138 | -0.19302 |
| -0.299830222 | 0.95206  | -0.0953  |
| -0.767462195 | 0.86754  | -0.27794 |
| -0.509485418 | 0.879331 | 0.19636  |
| -0.363330199 | 0.947285 | 0.08578  |
| -0.468818991 | 0.977817 | -0.03828 |
| -0.702420035 | 0.90186  | 0.18784  |
| -0.229057571 | 0.929167 | 0.15719  |
| -0.9738319   | 0.924398 | -0.1521  |
| -0.516290138 | 0.968613 | -0.05697 |
| -0.443121793 | 0.96544  | 0.05938  |
| -0.237565486 | 0.952459 | -0.11315 |
| -0.157022167 | 0.935789 | 0.14323  |
| -0.419760988 | 0.946661 | -0.11858 |
| -1.393581282 | 0.853209 | 0.24163  |
| -0.18346302  | 0.975243 | 0.04437  |
| -0.541004755 | 0.964599 | -0.05877 |
| 0.245582991  | 0.765377 | 0.39533  |
| -0.532897989 | 0.830543 | 0.2856   |
| -0.869426189 | 0.94306  | -0.06003 |
| -0.254785081 | 0.943014 | -0.12076 |
| -1.114943578 | 0.939701 | -0.10975 |
| -0.387905326 | 0.904493 | 0.13199  |
| -0.637429921 | 0.574028 | -0.5979  |
| 0.697120259  | 0.992602 | -0.01914 |
| -0.54148143  | 0.969811 | -0.04823 |
| -1.236046768 | 0.831802 | 0.26401  |
| -0.382948747 | 0.966758 | -0.07551 |
| -1.18570029  | 0.942629 | -0.11446 |
| -1.398375386 | 0.679916 | -0.7515  |
| -1.460850412 | 0.757142 | -0.47148 |
| -1.075071295 | 0.988267 | -0.00379 |
| -0.609163824 | 0.930076 | 0.09447  |
| -0.602228676 | 0.937681 | 0.04023  |
| -0.736062858 | 0.457882 | 0.21194  |
| -0.725164055 | 0.200164 | 0.32188  |
| -0.768234228 | 0.934826 | -0.0644  |
| -0.546776751 | 0.7598   | 0.28101  |
| -0.812221098 | 0.736588 | -0.11239 |
| -1.129013077 | 0.497607 | -0.32301 |
| -0.871246305 | 0.663414 | -0.1632  |
| -0.270574146 | 0.831999 | 0.21808  |
| -1.033594352 | 0.607923 | 0.08764  |
| -0.438543484 | 0.992122 | 0.01229  |
| -0.469403745 | 0.673333 | 0.32256  |
| -0.403632736 | 0.90037  | 0.09552  |
| -0.433935829 | 0.45586  | 0.35908  |
| -1.127731558 | 0.530514 | -0.15959 |
| -0.676422414 | 0.882349 | 0.09812  |
| -1.252454134 | 0.549234 | -0.20968 |
| -0.620206598 | 0.669486 | 0.20266  |
| -0.828987895 | 0.800139 | 0.14735  |

|              |          |          |
|--------------|----------|----------|
| -0.84824907  | 0.970449 | 0.02263  |
| -1.157616932 | 0.673071 | -0.0902  |
| -0.616530657 | 0.991772 | 0.01273  |
| -0.561203753 | 0.977685 | 0.02811  |
| -0.500035152 | 0.952641 | 0.06673  |
| -0.542882167 | 0.907126 | 0.06848  |
| -1.260108582 | 0.417775 | -0.38956 |
| -0.390207999 | 0.58631  | 0.36525  |
| -1.124684975 | 0.716975 | -0.16441 |
| -0.997477805 | 0.771209 | -0.10921 |
| -0.680393807 | 0.851527 | 0.14232  |
| -1.3272863   | 0.4805   | -0.46016 |
| -0.564449935 | 0.923504 | -0.14975 |
| -0.792168518 | 0.937348 | 0.09495  |
| -1.847996907 | 0.717088 | -0.442   |
| -1.133902983 | 0.71842  | -0.28815 |
| -0.497388439 | 0.925842 | 0.11795  |
| -0.310919449 | 0.979765 | -0.02848 |
| -0.385702927 | 0.892262 | -0.22366 |
| -0.406019017 | 0.940954 | -0.11548 |
| 0.090425489  | 0.799102 | 0.38936  |
| -0.337225508 | 0.789709 | -0.4562  |
| -0.78125787  | 0.844514 | 0.21043  |
| -1.137612325 | 0.802143 | 0.29269  |
| -1.68028746  | 0.533583 | -0.80851 |
| -0.466876431 | 0.988207 | 0.01687  |
| #NUM!        | 0.308068 | #NUM!    |
| -0.333243408 | 0.87393  | -0.23978 |
| -0.315096061 | 0.972722 | 0.05291  |
| -1.415037499 | 0.735184 | -0.67807 |
| 0.366427555  | 0.912176 | 0.22487  |
| -0.770575073 | 0.858245 | -0.19223 |
| -0.354902426 | 0.894732 | 0.15117  |
| -0.32725654  | 0.998706 | 0.00217  |
| 0.554588852  | 0.963905 | 0.08746  |
| -0.22986644  | 0.996797 | -0.00522 |
| -0.395266568 | 0.948754 | -0.08141 |
| -0.045246625 | 0.989818 | 0.01897  |
| -0.433081675 | 0.953382 | -0.0933  |
| -0.79464387  | 0.888808 | 0.21796  |
| -0.622668543 | 0.913895 | 0.13964  |
| -1.391037625 | 0.719784 | -0.50104 |
| -0.377121265 | 0.905798 | -0.15842 |
| -0.558121996 | 0.994116 | -0.01261 |
| -0.678933804 | 0.989133 | -0.01563 |
| -0.166316759 | 0.993847 | 0.01066  |
| 0.971571592  | 0.638469 | 0.86355  |
| 0.03748769   | 0.953486 | -0.09632 |
| 0.415037499  | 0.407544 | 1.22239  |
| -0.13700093  | 0.886364 | 0.2123   |
| -0.140917178 | 0.960413 | -0.05428 |
| -1.1048499   | 0.609792 | -0.90636 |
| -2.398549376 | 0.752548 | -0.45323 |
| -1.289506617 | 0.417023 | -1.1375  |
| -3.384220203 | 0.396633 | -0.66319 |
| -3.266140317 | 0.569444 | -0.60318 |

|              |          |          |
|--------------|----------|----------|
| -2.321928095 | 0.669515 | -0.73697 |
| 0.514573173  | 0.589624 | 0.89308  |
| -0.437951891 | 0.738583 | -0.6939  |
| -0.463033626 | 0.916047 | -0.19634 |
| -0.637194433 | 0.949222 | 0.07688  |
| -2           | 0.529173 | -0.83007 |
| -1.224579966 | 0.79969  | 0.43938  |
| -0.183494334 | 0.845658 | -0.40559 |
| -0.085860737 | 0.939444 | 0.1302   |
| -0.527629326 | 0.842398 | -0.33498 |
| -0.108882531 | 0.917774 | -0.19857 |
| -0.207970746 | 0.920001 | 0.15535  |
| -0.239338361 | 0.943565 | -0.09752 |
| -0.432524665 | 0.844205 | -0.35086 |
| -0.828624616 | 0.828208 | -0.36793 |
| -0.045740545 | 0.844279 | 0.29785  |
| 0.260722766  | 0.912066 | 0.19626  |
| -0.417629944 | 0.869305 | -0.17707 |
| -0.449482393 | 0.91873  | -0.11463 |
| -1.139634536 | 0.910845 | -0.09536 |
| 0.026553419  | 0.998073 | -0.00447 |
| -0.404879281 | 0.973184 | -0.05307 |
| -0.206648358 | 0.971546 | 0.04832  |
| -0.445943541 | 0.90122  | 0.13814  |
| -0.143039014 | 0.883957 | -0.26584 |
| -0.36193509  | 0.961453 | -0.07998 |
| -0.303720911 | 0.984275 | -0.02828 |
| -0.282809638 | 0.926706 | 0.09803  |
| -0.672789237 | 0.994221 | -0.00576 |
| 0.332575339  | 0.586977 | 0.62015  |
| 0.204358499  | 0.950415 | -0.0973  |
| -0.231325546 | 0.639076 | -0.66742 |
| -1.537706775 | 0.839595 | 0.3181   |
| -0.184964345 | 0.959977 | 0.07137  |
| -0.215222926 | 0.812462 | 0.37126  |
| -0.385743192 | 0.902758 | 0.14756  |
| -2.88849923  | 0.523994 | -0.65891 |
| -0.735454127 | 0.968981 | 0.03585  |
| -0.554918766 | 0.905234 | -0.20064 |
| -0.185098795 | 0.990223 | -0.01919 |
| -1.110638127 | 0.547918 | -0.16816 |
| -0.635201502 | 0.936105 | -0.08396 |
| -0.16379199  | 0.895666 | -0.25184 |
| 0.268485211  | 0.855899 | 0.31411  |
| -1.575526649 | 0.845394 | -0.26912 |
| -0.441109839 | 0.981341 | 0.02296  |
| -0.398549376 | 0.880946 | 0.22948  |
| -0.63183321  | 0.991058 | -0.01575 |
| -0.229867542 | 0.889608 | 0.18189  |
| -1.15324626  | 0.558835 | -0.47207 |
| -0.582346553 | 0.930451 | -0.13724 |
| -0.640522435 | 0.801184 | -0.12107 |
| -0.737646613 | 0.932448 | -0.13283 |
| -0.617258837 | 0.922166 | -0.12703 |
| -0.271302022 | 0.773506 | -0.60572 |
| 0.888453347  | 0.802722 | 0.47805  |

|              |          |          |
|--------------|----------|----------|
| -0.398989558 | 0.986731 | -0.02688 |
| -0.652076697 | 0.945676 | 0.12553  |
| -0.210004288 | 0.922021 | -0.18405 |
| -0.854688109 | 0.868109 | 0.09681  |
| -0.394505666 | 0.681805 | 0.29013  |
| -0.575531855 | 0.942864 | -0.12196 |
| -0.235584428 | 0.96784  | 0.05072  |
| -1.294169623 | 0.907415 | 0.13966  |
| -0.739424385 | 0.707645 | -0.5905  |
| -0.227068909 | 0.827607 | 0.29078  |
| -2.040061504 | 0.862738 | -0.2106  |
| -0.142510069 | 0.819894 | 0.24071  |
| 0.170970379  | 0.909034 | 0.19701  |
| -0.108311811 | 0.639123 | 0.3666   |
| -0.427691753 | 0.945779 | 0.05561  |
| -0.531804565 | 0.945148 | -0.10285 |
| -0.132724749 | 0.985915 | -0.03417 |
| #DIV/0!      | 0.308068 | #DIV/0!  |
| #DIV/0!      | 0        | #DIV/0!  |
| #NUM!        | 1        | 0        |
| -0.461331152 | 0.825984 | -0.32193 |
| 0            | 1        | 0        |
| -0.666646298 | 0.937564 | -0.09694 |
| -1.03562391  | 0.643953 | -0.89376 |
| -1.264209566 | 0.827242 | -0.31792 |
| -1.383989063 | 0.707275 | -0.67262 |
| -0.304530337 | 0.966318 | 0.06626  |
| -0.689622013 | 0.918086 | -0.15998 |
| -1.341036918 | 0.731455 | -0.44057 |
| -1.63005039  | 0.29018  | -0.30355 |
| #DIV/0!      | 0.353387 | #DIV/0!  |
| -0.470717829 | 0.906465 | -0.15598 |
| -0.474257636 | 0.789312 | 0.1449   |
| -0.543113852 | 0.82683  | 0.12664  |
| -0.462243342 | 0.854638 | 0.1774   |
| -0.180309484 | 0.891578 | 0.19683  |
| -0.480190179 | 0.952002 | 0.08724  |
| -2.068845329 | 0.856692 | 0.22985  |
| -0.932885804 | 0.450185 | -2.39232 |
| -0.775955764 | 0.894166 | -0.15625 |
| -0.6596293   | 0.980154 | 0.02739  |
| -0.43874176  | 0.988717 | -0.02029 |
| 0            | 0.651448 | 1        |
| -1.485426827 | 0.860941 | 0.19265  |
| -0.490624856 | 0.933477 | -0.12572 |
| -0.595214621 | 0.960558 | -0.05633 |
| -0.81603406  | 0.807407 | -0.17288 |
| -0.591371641 | 0.942048 | -0.08156 |
| -0.28661751  | 0.930007 | -0.13171 |
| -0.590147348 | 0.838982 | 0.27236  |
| -0.566103473 | 0.888402 | -0.21818 |
| -3.624490865 | 0.418385 | -1.4021  |
| 2.590416931  | 0.637542 | 1.45346  |
| -0.61005514  | 0.823961 | -0.24327 |
| -0.287535368 | 0.879185 | 0.19054  |
| -0.414734889 | 0.959593 | -0.0669  |

|              |          |          |
|--------------|----------|----------|
| -0.508364208 | 0.891072 | 0.12101  |
| -1.964606093 | 0.972931 | -0.04793 |
| -0.564519086 | 0.977278 | -0.03613 |
| -0.685722185 | 0.600342 | 0.22745  |
| -0.128397354 | 0.967475 | -0.06661 |
| -0.612026422 | 0.887138 | -0.20764 |
| -0.570012159 | 0.910335 | -0.14597 |
| -0.510245956 | 0.99428  | 0.00819  |
| -0.472216597 | 0.949963 | -0.09021 |
| -0.782124055 | 0.797098 | 0.12063  |
| -0.607677673 | 0.939865 | -0.08956 |
| -0.583287313 | 0.963115 | 0.0405   |
| -0.339563201 | 0.989825 | 0.01584  |
| -1.678071905 | 0.726175 | 0.58496  |
| -0.728790444 | 0.622485 | -0.41741 |
| -0.048403044 | 0.926549 | -0.18037 |
| -0.224392418 | 0.926577 | -0.15919 |
| -0.070231868 | 0.994746 | -0.01261 |
| 1.193826872  | 0.997749 | 0.00755  |
| 0.389042291  | 0.699929 | 0.5541   |
| -0.972330073 | 0.848589 | -0.29022 |
| -0.485426827 | 0.859775 | 0.28011  |
| -6.828665428 | 0.241614 | -5.60627 |
| -0.09530696  | 0.771746 | -0.65239 |
| -0.24197279  | 0.87349  | 0.23897  |
| 0.137230828  | 0.908039 | 0.16425  |
| -2.981514429 | 0.378337 | -1.14769 |
| -0.691877705 | 0.800217 | -0.51785 |
| 0.733063486  | 0.959134 | 0.11247  |
| -0.406010715 | 0.936931 | -0.13135 |
| 0            | 0.450185 | #NUM!    |
| -0.196713676 | 0.938757 | 0.11581  |
| -0.226330824 | 0.897315 | 0.1208   |
| -0.555450391 | 0.885231 | 0.16373  |
| -0.566356689 | 0.960426 | 0.05906  |
| -0.226350848 | 0.917047 | 0.15499  |
| -1           | 0.499013 | 0.66297  |
| -1.087462841 | 0.520207 | -0.91754 |
| -0.295314254 | 0.976849 | 0.04192  |
| 0.301508554  | 0.984833 | -0.03953 |
| -0.435673792 | 0.982597 | 0.02982  |
| #DIV/0!      | ?        | #DIV/0!  |
| -1.792103542 | 0.540495 | -0.84295 |
| -0.412867837 | 0.937052 | -0.10649 |
| -0.281531606 | 0.811904 | 0.2196   |
| -0.446750799 | 0.850953 | 0.11349  |
| 0.860927808  | 0.659393 | 0.78611  |
| 1.222392421  | 0.733579 | 0.73697  |
| 0            | 0.450185 | #NUM!    |
| -0.925999419 | 0.597878 | -1.24793 |
| -1.019118952 | 0.834031 | 0.33237  |
| -0.53341818  | 0.993003 | -0.01016 |
| -0.250194476 | 0.921264 | 0.13974  |
| #NUM!        | 0.308068 | #NUM!    |
| -0.714300403 | 0.971823 | -0.0356  |
| -2.974909019 | 0.746613 | -0.34104 |

|              |          |          |
|--------------|----------|----------|
| -2.462189462 | 0.329814 | -1.65426 |
| -0.850226729 | 0.930018 | 0.12955  |
| -2.321928095 | 0.31594  | #NUM!    |
| 0.279154071  | 0.692112 | -0.47573 |
| -2.247927513 | 0.234161 | -2.24793 |
| -0.161062433 | 0.748204 | 0.36595  |
| 0.671377253  | 0.825009 | -0.58496 |
| #DIV/0!      | ?        | #DIV/0!  |
| -0.067114196 | 0.568878 | 0.58496  |
| -0.757429697 | 0.897214 | -0.12738 |
| -0.239806926 | 0.934057 | 0.10557  |
| 0.372658897  | 0.655923 | 0.41883  |
| 0            | 0.956817 | -0.08746 |
| -0.566016866 | 0.934729 | -0.14203 |
| -0.30422685  | 0.960423 | -0.07646 |
| #NUM!        | 0.308068 | #NUM!    |
| -0.190887842 | 0.982803 | -0.03442 |
| -0.301751726 | 0.921875 | -0.1844  |
| -1.137503524 | 0.705361 | -0.45943 |
| 1.49696602   | 0.440139 | 1.4787   |
| 0.486358053  | 0.673252 | 0.72103  |
| -0.233117735 | 0.957749 | -0.09654 |
| -0.053636142 | 0.99812  | 0.00438  |
| -0.893269353 | 0.895154 | -0.14937 |
| -1.162402043 | 0.805132 | -0.36814 |
| -1.175424917 | 0.810949 | 0.35184  |
| -0.768674454 | 0.62321  | -1.06413 |
| -0.477359546 | 0.99824  | 0.00385  |
| -1.201633861 | 0.512137 | -1.20163 |
| -0.354354463 | 0.978707 | 0.03234  |
| -0.096390701 | 0.876109 | 0.21096  |
| -0.88089059  | 0.961763 | -0.05277 |
| 0.048874344  | 0.882711 | 0.20842  |
| -0.556347419 | 0.758313 | -0.54837 |
| -0.473563576 | 0.964327 | -0.06955 |
| -0.385559902 | 0.985766 | 0.02255  |
| -1.116440484 | 0.778574 | 0.48509  |
| -1.065724182 | 0.885006 | -0.18018 |
| -1.084455147 | 0.860146 | 0.28775  |
| -0.092951483 | 0.942104 | 0.11165  |
| -0.154722595 | 0.629817 | 0.42479  |
| -1.290296486 | 0.854555 | 0.24155  |
| -0.921573353 | 0.810881 | -0.41952 |
| -2.389965616 | 0.95426  | -0.05417 |
| #DIV/0!      | ?        | #DIV/0!  |
| -0.593493305 | 0.81511  | -0.42948 |
| -1.54220969  | 0.704695 | -0.53318 |
| -0.333322849 | 0.681145 | -0.50882 |
| #DIV/0!      | ?        | #DIV/0!  |
| -1.723695357 | 0.964124 | -0.07405 |
| -0.762805599 | 0.732105 | -0.61952 |
| -0.121521267 | 0.64843  | 0.31286  |
| -0.286472518 | 0.980425 | -0.04702 |
| -0.949582093 | 0.971439 | -0.03513 |
| -0.537404672 | 0.895754 | 0.15766  |
| -0.449133726 | 0.779513 | 0.22945  |



|              |          |          |
|--------------|----------|----------|
| -0.844139665 | 0.995013 | 0.0073   |
| -0.622321973 | 0.95895  | -0.05396 |
| -0.122532602 | 0.954037 | -0.08703 |
| -0.460409007 | 0.947224 | 0.06442  |
| -0.255257055 | 0.777468 | 0.31097  |
| -0.216958535 | 0.890337 | 0.1596   |
| -0.2705977   | 0.715682 | 0.38527  |
| -0.2405734   | 0.938907 | 0.09709  |
| -0.10456592  | 0.986913 | 0.02124  |
| -0.628541924 | 0.94441  | 0.05201  |
| -0.712656142 | 0.921876 | -0.08886 |
| -0.249359469 | 0.844528 | -0.29429 |
| -0.040641984 | 0.932891 | 0.152    |
| -0.655351829 | 0.749139 | -0.42269 |
| -0.039528364 | 0.865826 | 0.14222  |
| -0.333678299 | 0.908958 | 0.14829  |
| -0.197834847 | 0.985774 | 0.02248  |
| -0.578078048 | 0.996388 | 0.00432  |
| -0.04148034  | 0.936548 | 0.10704  |
| -0.821942645 | 0.937575 | -0.07079 |
| -0.74431826  | 0.738223 | -0.58496 |
| -2.321928095 | 0.230584 | -1.32193 |
| -0.490094488 | 0.913038 | -0.17308 |
| -0.468776342 | 0.918207 | 0.1023   |
| 0.624742403  | 0.854876 | 0.31633  |
| -0.495223881 | 0.899574 | 0.09448  |
| -1.051130563 | 0.586826 | 0.72407  |
| -1.990234944 | 0.482971 | -0.97773 |
| -0.160464672 | 0.815178 | 0.39593  |
| 0.159750611  | 0.930543 | 0.16306  |
| -1.305502547 | 0.710723 | 0.61571  |
| -0.41211015  | 0.904385 | 0.1154   |
| -1.926661761 | 0.590317 | -0.90364 |
| -0.601712096 | 0.668246 | 0.74214  |
| -2.095986222 | 0.989188 | 0.0224   |
| -0.070389328 | 0.922017 | 0.09495  |
| 0.125530882  | 0.916207 | 0.18442  |
| -0.488027998 | 0.95181  | 0.0789   |
| -0.526248302 | 0.960284 | 0.06683  |
| -0.279221585 | 0.588582 | 0.42563  |
| -0.574637419 | 0.937876 | 0.10158  |
| -0.65362099  | 0.956278 | 0.0672   |
| -0.656446607 | 0.987703 | -0.02378 |
| 0.272849273  | 0.321526 | 0.87822  |
| -0.895405562 | 0.800287 | -0.40504 |
| -0.910991537 | 0.602256 | -0.5496  |
| -0.122132564 | 0.882733 | 0.19295  |
| -0.598555198 | 0.986431 | 0.01204  |
| -0.664658729 | 0.954685 | 0.04391  |
| -0.961648591 | 0.767175 | 0.27773  |
| -0.245940466 | 0.994971 | 0.00961  |
| -0.468464103 | 0.963283 | -0.07623 |
| -0.490651548 | 0.948864 | 0.07304  |
| -1.167924869 | 0.863231 | -0.2367  |
| -0.57918478  | 0.974626 | -0.02806 |
| -0.560809963 | 0.976442 | 0.02432  |

|              |          |          |
|--------------|----------|----------|
| -1.055371268 | 0.918924 | -0.06015 |
| 0.084298234  | 0.99212  | 0.01235  |
| 0.105794664  | 0.941985 | 0.12029  |
| -0.433250303 | 0.875889 | 0.18279  |
| -1.338322533 | 0.795153 | -0.19681 |
| -0.471305719 | 0.968891 | 0.04981  |
| -0.656052798 | 0.942356 | 0.0396   |
| -0.61026706  | 0.856126 | 0.1827   |
| -0.645107142 | 0.947611 | -0.09831 |
| -0.311101064 | 0.983126 | 0.02881  |
| 0.346900047  | 0.646489 | 0.54346  |
| -0.427447856 | 0.963703 | 0.05679  |
| -0.606261438 | 0.966355 | 0.04977  |
| -0.355389244 | 0.972009 | -0.05135 |
| -0.597328534 | 0.986933 | -0.02693 |
| -0.301730389 | 0.99549  | 0.00907  |
| -0.027674481 | 0.94706  | 0.11609  |
| -0.572443697 | 0.874564 | -0.18361 |
| -0.614068292 | 0.96243  | -0.06157 |
| -0.549085464 | 0.916145 | -0.17681 |
| -0.505435314 | 0.889481 | -0.21598 |
| -0.591394452 | 0.98642  | -0.02134 |
| -0.326212575 | 0.945582 | -0.10775 |
| -0.580412693 | 0.919206 | -0.14989 |
| -0.4069331   | 0.862416 | -0.30703 |
| -0.52662919  | 0.970305 | 0.05497  |
| -0.548219909 | 0.913596 | -0.184   |
| -0.412160739 | 0.994587 | 0.00861  |
| -0.360758436 | 0.968246 | 0.0428   |
| -0.429738004 | 0.990878 | -0.01057 |
| -0.545247418 | 0.881203 | -0.2474  |
| -0.382158598 | 0.936923 | -0.1142  |
| -0.739481192 | 0.957367 | -0.05847 |
| -0.500959515 | 0.95719  | -0.06665 |
| -0.451960369 | 0.956677 | -0.07219 |
| -0.42388929  | 0.934346 | -0.10727 |
| -0.42409961  | 0.96092  | -0.07476 |
| -0.499397732 | 0.92597  | -0.13604 |
| -0.638600112 | 0.806414 | -0.2781  |
| -0.691103153 | 0.979053 | -0.01498 |
| -0.627364057 | 0.928991 | -0.12128 |
| -0.461862445 | 0.827415 | 0.16486  |
| -0.622221207 | 0.892167 | -0.20546 |
| -0.256109479 | 0.95619  | -0.06819 |
| 0.708233876  | 0.733051 | 0.42011  |
| -0.786632979 | 0.619498 | -0.73697 |
| -0.115477217 | 0.616974 | 0.75899  |
| -2.397592365 | 0.389994 | -0.70571 |
| -0.366668538 | 0.926477 | -0.12646 |
| 0            | 0.707393 | 0.69188  |
| -1.34452819  | 0.855751 | 0.29688  |
| -0.560134817 | 0.872333 | -0.23713 |
| #DIV/0!      | ?        | #DIV/0!  |
| -1.762305751 | 0.826078 | 0.30569  |
| -0.321928095 | 0.956495 | -0.08813 |
| -0.415037499 | 0.784095 | 0.5025   |

|              |          |          |
|--------------|----------|----------|
| -2           | 0.187993 | -1.41504 |
| -0.650331948 | 0.703485 | -0.56235 |
| -0.193232375 | 0.771855 | 0.25548  |
| -0.690171834 | 0.976636 | -0.03128 |
| -0.672452757 | 0.885972 | 0.14083  |
| -0.38502493  | 0.906954 | -0.18561 |
| -0.682923635 | 0.818577 | -0.26823 |
| -0.964810572 | 0.72321  | 0.57901  |
| -0.753644335 | 0.863696 | -0.26105 |
| 0.389570866  | 0.759068 | 0.43736  |
| -0.68818936  | 0.823272 | -0.31236 |
| -0.361144491 | 0.977212 | 0.03662  |
| -4.98847813  | 0.153703 | -3.75861 |
| -0.429849255 | 0.959605 | 0.07716  |
| -0.507708447 | 0.998719 | 0.00167  |
| -0.5167142   | 0.927916 | 0.12428  |
| 1.117716576  | 0.897981 | 0.31842  |
| -1.005040596 | 0.836244 | 0.36868  |
| -0.888943473 | 0.881425 | 0.26423  |
| -0.118784502 | 0.971157 | 0.0688   |
| 0.041275987  | 0.799298 | -0.55154 |
| -1.807354922 | 0.552674 | -1.22239 |
| -0.253359451 | 0.981372 | -0.03449 |
| -2           | 0.724378 | -0.41504 |
| -0.774730501 | 0.972934 | 0.03847  |
| -1.189920029 | 0.998886 | 0.00229  |
| -0.749695191 | 0.954462 | -0.06178 |
| -0.304216644 | 0.916125 | 0.14719  |
| -0.520642738 | 0.992071 | -0.01345 |
| -0.339850003 | 0.994498 | -0.01192 |
| -0.7006123   | 0.909283 | -0.06495 |
| -2.353636955 | 0.71324  | -0.46467 |
| 0.082009219  | 0.956435 | 0.10305  |
| -0.505344574 | 0.981317 | -0.01658 |
| -0.630878336 | 0.835393 | -0.33502 |
| -0.675293074 | 0.968324 | -0.04849 |
| -1.192645078 | 0.704038 | -0.67807 |
| -1.91131883  | 0.461792 | -1.91132 |
| -1.063363786 | 0.948207 | -0.0766  |
| -0.217649084 | 0.824583 | 0.26942  |
| 5.594946589  | 0.684497 | 3.72489  |
| 0.628031223  | 0.944449 | 0.12553  |
| -0.832039185 | 0.927014 | -0.10744 |
| -2.36826274  | 0.585474 | -0.66008 |
| -1.212734926 | 0.651614 | -0.34314 |
| 0            | 0.450185 | #NUM!    |
| -0.022782475 | 0.95992  | 0.07095  |
| -1.5334322   | 0.441804 | -1.38904 |
| -0.597047408 | 0.974434 | 0.04735  |
| -0.735239349 | 0.744267 | 0.47621  |
| -0.715046279 | 0.906436 | -0.18755 |
| #DIV/0!      | 0.308068 | #DIV/0!  |
| -2           | 0.937711 | 0.09954  |
| -0.736965594 | 0.593125 | -1.32193 |
| -3.321928095 | 0.365618 | -3       |
| -1.807354922 | 0.577912 | -1.22239 |

|              |          |          |
|--------------|----------|----------|
| 0.436099115  | 0.681777 | 0.61298  |
| #DIV/0!      | 0.308068 | #DIV/0!  |
| -0.390562998 | 0.910241 | 0.19328  |
| -1.354566911 | 0.584049 | -0.51611 |
| -0.510925041 | 0.958657 | 0.06912  |
| #DIV/0!      | ?        | #DIV/0!  |
| #DIV/0!      | ?        | #DIV/0!  |
| #NUM!        | 1        | 0        |
| -71.96515146 | 0.256222 | 1.71294  |
| 2.068103372  | 0.561847 | 2.0681   |
| -1.693724054 | 0.326456 | #NUM!    |
| -6.133130521 | 0.756502 | -0.58496 |
| #DIV/0!      | ?        | #DIV/0!  |
| -0.273807931 | 0.720821 | 0.41188  |
| 0.001132858  | 0.952395 | 0.08864  |
| -0.565236973 | 0.65694  | 0.28469  |
| -0.649470201 | 0.87779  | -0.18013 |
| -0.321928095 | 0.949172 | -0.09894 |
| -0.479923016 | 0.947293 | 0.08346  |
| -0.57565676  | 0.900925 | -0.13518 |
| -0.474495733 | 0.942184 | -0.09664 |
| -0.687937258 | 0.852303 | -0.16832 |
| -0.235556123 | 0.891172 | 0.12147  |
| -0.137436298 | 0.96661  | -0.07167 |
| -0.684074413 | 0.976063 | 0.02465  |
| -0.550072519 | 0.892686 | 0.19808  |
| -0.453451923 | 0.940981 | -0.10633 |
| -0.851879369 | 0.962695 | -0.06737 |
| -0.421848031 | 0.966846 | -0.05953 |
| -0.587755716 | 0.934611 | -0.12224 |
| -0.273785302 | 0.931367 | -0.14193 |
| -0.632768543 | 0.848406 | -0.3096  |
| -1.793193385 | 0.827503 | -0.38277 |
| -1.358476726 | 0.724896 | -0.55916 |
| -0.317549654 | 0.922954 | 0.13258  |
| -0.153676026 | 0.747981 | 0.23869  |
| -0.208835973 | 0.930064 | 0.11658  |
| -0.371968777 | 0.966322 | -0.06711 |
| -0.771341174 | 0.74237  | -0.53585 |
| -0.227805918 | 0.630396 | -1.0163  |
| -0.195395689 | 0.985913 | 0.02857  |
| 0.527931556  | 0.934097 | 0.1587   |
| -1.91753784  | 0.742971 | -0.22948 |
| -0.526462957 | 0.994848 | 0.00662  |
| -0.508674391 | 0.968884 | -0.04389 |
| -0.253166412 | 0.891798 | 0.14675  |
| -1.807354922 | 0.133887 | -1.80735 |
| 0.415037499  | 0.834708 | 0.41504  |
| 0.811258648  | 0.943604 | -0.19431 |
| -1.544732656 | 0.733905 | -0.56325 |
| 0.517128132  | 0.840204 | -0.5178  |
| -6.377752795 | 0.100356 | -3.44111 |
| 0.048226736  | 0.397317 | -3.60502 |
| 1            | 0.622002 | -1       |
| -0.839817589 | 0.954345 | -0.05805 |
| 0.120294234  | 0.943592 | 0.12029  |

|              |          |          |
|--------------|----------|----------|
| -0.555025217 | 0.882641 | 0.16993  |
| -0.627169884 | 0.951728 | 0.0739   |
| -0.426243613 | 0.970837 | -0.06009 |
| -0.704364541 | 0.898918 | -0.18018 |
| -0.283368248 | 0.992319 | -0.01638 |
| -0.067658301 | 0.944396 | 0.12199  |
| 0.443033129  | 0.85139  | 0.30467  |
| 0.325986311  | 0.86062  | 0.37381  |
| 0.477098467  | 0.800059 | 0.4308   |
| -0.74819285  | 0.900721 | 0.10605  |
| -1.090459642 | 0.836501 | -0.29416 |
| #NUM!        | 1        | 0        |
| -0.192941654 | 0.751379 | 0.29553  |
| -0.292522582 | 0.979371 | 0.04166  |
| -0.2793824   | 0.993642 | 0.01012  |
| -0.265461143 | 0.994574 | -0.01058 |
| -3.169925001 | 0.672563 | -0.58496 |
| -1.415037499 | 0.535489 | -1.41504 |
| 0.978626349  | 0.902109 | 0.05004  |
| #NUM!        | 0.308068 | #NUM!    |
| -0.630672554 | 0.749885 | 0.31669  |
| 0.057821731  | 0.907646 | 0.16529  |
| -0.42189117  | 0.894105 | -0.24942 |
| -0.502500341 | 0.978427 | 0.04182  |
| -1.067744607 | 0.761211 | -0.38275 |
| #NUM!        | 0.308068 | #NUM!    |
| -1.523561956 | 0.556549 | -0.9386  |
| -2.058893689 | 0.196218 | -1.64386 |
| 0            | 0.724378 | -0.58496 |
| -1.157541277 | 0.953065 | -0.0898  |
| -0.893084796 | 0.899149 | 0.15754  |
| -0.971618199 | 0.743815 | -0.56598 |
| 0.218185032  | 0.938108 | -0.14398 |
| 0.409707995  | 0.952311 | 0.09205  |
| 0.104023065  | 0.73769  | -0.35431 |
| -0.139721859 | 0.984812 | 0.02666  |
| -0.116058129 | 0.879375 | 0.18303  |
| -0.584962501 | 0.716912 | -0.67807 |
| -0.604942068 | 0.855908 | -0.10623 |
| -0.238841232 | 0.993203 | 0.01303  |
| -0.347923303 | 0.987397 | -0.02308 |
| -0.49690466  | 0.997457 | 0.00404  |
| -0.192645078 | 0.815909 | -0.41504 |
| 0.700439718  | 0.815301 | 0.38082  |
| -0.101059214 | 0.998494 | -0.00291 |
| -0.784659985 | 0.949234 | -0.08203 |
| -0.547811124 | 0.928186 | -0.15077 |
| -0.624932935 | 0.72103  | 0.37904  |
| -0.218951937 | 0.921502 | -0.1654  |
| -0.204705561 | 0.963117 | 0.04608  |
| -0.236166702 | 0.817969 | 0.28233  |
| -0.478653599 | 0.83474  | -0.30087 |
| -0.748258489 | 0.914788 | 0.0984   |
| -0.581767087 | 0.979593 | 0.03362  |
| -0.563794175 | 0.940551 | 0.09424  |
| 0            | 0.935213 | 0.11499  |

|              |          |          |
|--------------|----------|----------|
| -1.044524615 | 0.998076 | -0.00418 |
| 0.584962501  | 0.545627 | #NUM!    |
| -0.401518225 | 0.908816 | -0.14091 |
| -0.176003261 | 0.971464 | -0.05611 |
| -0.438858421 | 0.948327 | 0.08221  |
| -0.0596387   | 0.971876 | -0.05103 |
| -0.297243832 | 0.905848 | 0.11154  |
| -0.202560547 | 0.959805 | -0.08818 |
| -0.698275889 | 0.86662  | -0.30979 |
| -0.52028898  | 0.830317 | 0.16268  |
| -1.333423734 | 0.758403 | -0.39232 |
| -0.958119476 | 0.997749 | -0.0042  |
| -0.121678557 | 0.967043 | -0.06351 |
| 0.281180379  | 0.943219 | 0.13244  |
| -1.07424116  | 0.756811 | 0.3651   |
| -0.695145418 | 0.679282 | -0.76553 |
| 0.01750865   | 0.860667 | -0.2951  |
| -0.217754316 | 0.427027 | 0.40383  |
| -0.027421603 | 0.983888 | 0.03744  |
| -0.51576499  | 0.929657 | -0.12694 |
| -0.293211506 | 0.980613 | 0.03397  |
| -0.722131256 | 0.861849 | -0.30664 |
| -0.355495554 | 0.95973  | 0.0702   |
| -1.114332675 | 0.972942 | -0.04891 |
| -0.770254214 | 0.885638 | 0.22399  |
| -0.314935508 | 0.987451 | 0.02527  |
| -0.356018455 | 0.994948 | 0.00729  |
| -0.213595473 | 0.965105 | -0.06929 |
| -0.338030064 | 0.911222 | -0.18935 |
| -0.452248578 | 0.91748  | -0.17557 |
| -0.513252628 | 0.714955 | -0.7416  |
| -0.500507123 | 0.858843 | -0.28742 |
| #NUM!        | 0.622002 | 1        |
| -1.880627911 | 0.999058 | -0.00198 |
| -3.617752436 | 0.361078 | -2.77529 |
| 0.093641396  | 0.981307 | 0.03055  |
| -0.067776045 | 0.903525 | -0.18833 |
| -0.382607833 | 0.972403 | 0.04677  |
| -0.530514717 | 0.880443 | 0.13245  |
| 0.275634443  | 0.620062 | 0.53867  |
| -0.444358073 | 0.977893 | -0.04333 |
| -0.663290861 | 0.827098 | 0.38242  |
| -0.163498732 | 0.93978  | -0.13106 |
| -0.492757921 | 0.806593 | -0.45677 |
| -0.555816155 | 0.769096 | 0.23496  |
| -0.293731203 | 0.962276 | -0.07229 |
| -0.458000137 | 0.918277 | -0.1519  |
| -0.424823245 | 0.934538 | -0.13736 |
| -0.849859651 | 0.946595 | 0.0726   |
| -0.277599718 | 0.608466 | 0.39263  |
| -0.598726903 | 0.941313 | 0.07177  |
| -0.438884241 | 0.898642 | -0.15815 |
| -0.354781776 | 0.960239 | -0.07063 |
| -0.617909159 | 0.915075 | -0.13641 |
| -0.185555653 | 0.978806 | -0.04036 |
| -0.096774875 | 0.945748 | -0.11153 |

|              |          |          |
|--------------|----------|----------|
| -1.100264123 | 0.703464 | -0.58242 |
| -0.195655277 | 0.790478 | 0.29677  |
| -0.163852811 | 0.912259 | 0.13911  |
| 0.122433545  | 0.944618 | -0.12273 |
| -0.872176151 | 0.900017 | 0.14797  |
| -1.347413066 | 0.92428  | -0.1518  |
| -0.431193268 | 0.987183 | 0.02548  |
| -0.266432982 | 0.858274 | -0.3469  |
| -0.827266851 | 0.972954 | 0.04697  |
| -0.807354922 | 0.920397 | -0.14439 |
| -0.017006425 | 0.99192  | -0.01701 |
| -0.450916054 | 0.965602 | -0.06206 |
| -0.230904467 | 0.985827 | -0.02907 |
| 0.197759435  | 0.994185 | -0.01264 |
| -0.843902662 | 0.517594 | -1.25861 |
| #DIV/0!      | ?        | #DIV/0!  |
| 0.736965594  | 0.743666 | 0.58496  |
| -1.807354922 | 0.776099 | -0.48543 |
| 0.479992941  | 0.901799 | 0.24393  |
| -0.380468099 | 0.884019 | -0.2341  |
| -0.613454072 | 0.916922 | -0.11064 |
| -0.37800012  | 0.851787 | 0.15507  |
| -0.498318305 | 0.934487 | -0.13878 |
| -0.194535965 | 0.884353 | 0.22833  |
| -0.447916903 | 0.952458 | 0.08835  |
| -0.390945269 | 0.827569 | 0.25803  |
| -0.571866843 | 0.91705  | 0.08238  |
| -1.337883349 | 0.646526 | 0.54962  |
| -0.689361849 | 0.90197  | -0.13306 |
| -0.368433235 | 0.994244 | 0.00848  |
| -1.265172773 | 0.938986 | -0.12112 |
| -0.145580121 | 0.965265 | 0.07068  |
| -1.170114245 | 0.811371 | -0.40348 |
| -1.535758503 | 0.462311 | -1.67925 |
| 0.43622623   | 0.70602  | 0.77521  |
| -1.014269242 | 0.838473 | -0.33728 |
| 0.096137097  | 0.955234 | 0.10067  |
| 0.441604063  | 0.747564 | 0.64335  |
| -0.841068918 | 0.984655 | 0.02883  |
| -0.582854838 | 0.879149 | -0.26641 |
| -1.586499936 | 0.962417 | 0.07354  |
| 0.415037499  | 0.812953 | -0.48543 |
| -0.257106851 | 0.978117 | -0.05012 |
| -0.541871838 | 0.945791 | 0.06379  |
| -0.150196859 | 0.971745 | -0.06789 |
| -0.043589269 | 0.83077  | -0.42653 |
| -0.369546115 | 0.959402 | 0.06831  |
| -0.392472493 | 0.995868 | -0.00662 |
| -0.471806827 | 0.998804 | -0.00208 |
| 2.263034406  | 0.337423 | 1.37851  |
| -0.503065992 | 0.972718 | -0.04655 |
| -1.47691871  | 0.97355  | 0.05852  |
| -0.406686869 | 0.909564 | -0.19179 |
| -0.376952305 | 0.898057 | 0.16892  |
| 0.334201068  | 0.908574 | 0.19205  |
| 0.054996114  | 0.925625 | 0.13616  |

|              |          |          |
|--------------|----------|----------|
| -0.593646768 | 0.956805 | -0.0378  |
| -0.401521601 | 0.963757 | -0.05951 |
| -0.198308187 | 0.972198 | -0.06002 |
| -0.366393907 | 0.936545 | 0.13547  |
| 0            | 0.769637 | -0.34618 |
| -0.327588504 | 0.855991 | -0.22581 |
| -1.320272045 | 0.915638 | -0.1673  |
| -0.377557647 | 0.873815 | -0.26871 |
| -0.026563605 | 0.93676  | 0.1199   |
| -0.492707417 | 0.988246 | -0.02005 |
| -0.584962501 | 0.834708 | 0.41504  |
| -0.170395932 | 0.958421 | 0.08058  |
| 0.210101539  | 0.869364 | 0.20119  |
| -0.191646863 | 0.973046 | 0.04265  |
| -0.320695363 | 0.803266 | 0.26208  |
| -0.305750741 | 0.883664 | 0.14666  |
| -0.500898236 | 0.998799 | -0.00214 |
| -0.62266296  | 0.899899 | 0.14499  |
| -0.333749126 | 0.891532 | 0.13653  |
| 1            | 1        | 0        |
| -2.459431619 | 0.672262 | 0.44746  |
| -0.133390145 | 0.958504 | 0.07194  |
| -0.423819464 | 0.920965 | -0.1658  |
| -0.415037499 | 0.982032 | 0.03953  |
| -0.404334498 | 0.719061 | 0.29553  |
| -0.366176576 | 0.959486 | 0.05181  |
| -0.213569401 | 0.974795 | -0.03674 |
| -0.578150253 | 0.99957  | 0.00055  |
| -0.260664799 | 0.935366 | 0.08568  |
| -0.440590636 | 0.950144 | -0.0934  |
| -0.466718849 | 0.916374 | 0.11271  |
| -0.568812192 | 0.936921 | 0.10402  |
| 0.11783649   | 0.934606 | 0.14585  |
| -0.247492651 | 0.769887 | 0.25426  |
| -0.727401543 | 0.942242 | 0.0696   |
| -0.231280225 | 0.995778 | -0.00941 |
| -0.832605599 | 0.784299 | 0.43985  |
| -0.783935009 | 0.882398 | -0.17076 |
| -1.635588574 | 0.973411 | -0.05063 |
| -1.394605599 | 0.576383 | -1.07268 |
| 0.079013752  | 0.886703 | 0.27832  |
| -0.717018421 | 0.745986 | -0.55551 |
| -0.890245636 | 0.984493 | 0.02739  |
| -0.517844488 | 0.812323 | 0.3685   |
| -1.098572794 | 0.823089 | -0.373   |
| 0            | 1        | 0        |
| -0.103093493 | 0.84776  | -0.33442 |
| -0.443897254 | 0.979178 | 0.03445  |
| -0.098563834 | 0.844479 | 0.27208  |
| 0.099535674  | 0.964596 | 0.09954  |
| -0.361512561 | 0.953895 | 0.09003  |
| -0.600392541 | 0.739412 | 0.55394  |
| -0.912052301 | 0.892152 | -0.22047 |
| -0.793549123 | 0.855681 | 0.29956  |
| -1.380480277 | 0.458517 | -1.03317 |
| 0.141661734  | 0.848301 | 0.29512  |



|              |          |          |
|--------------|----------|----------|
| -0.812576408 | 0.811942 | -0.3261  |
| -0.719774707 | 0.675028 | -0.62133 |
| -1.019469864 | 0.634967 | -0.77816 |
| -0.175423932 | 0.917018 | -0.20231 |
| -0.732914974 | 0.91557  | -0.19671 |
| -0.683895671 | 0.609535 | -0.70208 |
| -0.543783899 | 0.841285 | 0.19425  |
| -0.48320749  | 0.938756 | 0.0829   |
| -0.345977008 | 0.980354 | 0.03281  |
| -0.277629033 | 0.925308 | 0.10448  |
| -0.434175336 | 0.906    | -0.14082 |
| -0.26040175  | 0.988614 | 0.01909  |
| -0.233454048 | 0.902668 | 0.13617  |
| -0.28971347  | 0.955634 | -0.09622 |
| -0.582073064 | 0.899457 | -0.18008 |
| -0.468739512 | 0.887722 | -0.22606 |
| -1           | 0.85152  | -0.28758 |
| -1.789463322 | 0.955146 | -0.0525  |
| -4.692490965 | 0.234052 | -5.17792 |
| 0.542317969  | 0.789019 | 0.43954  |
| -0.467228221 | 0.934279 | -0.13023 |
| -0.538492461 | 0.968168 | -0.06226 |
| -0.394051359 | 0.982538 | -0.03551 |
| 0.476438044  | 0.950225 | 0.12029  |
| -0.277163531 | 0.986531 | -0.02726 |
| -0.94410387  | 0.99323  | 0.00553  |
| -0.252026082 | 0.966146 | -0.07104 |
| -0.643261431 | 0.909736 | -0.17639 |
| -0.548487368 | 0.897257 | 0.11541  |
| -0.484180294 | 0.997545 | 0.00451  |
| #DIV/0!      | ?        | #DIV/0!  |
| -0.244922357 | 0.952899 | -0.09345 |
| -0.217823641 | 0.912132 | 0.16715  |
| -1.215947969 | 0.967332 | -0.02497 |
| -0.354961418 | 0.921758 | 0.10246  |
| 0.05943727   | 0.97959  | 0.0422   |
| 0.155624569  | 0.754884 | 0.38739  |
| -0.352608295 | 0.945199 | 0.11785  |
| -0.849533648 | 0.714556 | -0.68597 |
| 1.584962501  | 0.312117 | 1.73697  |
| -0.921851754 | 0.760274 | -0.47632 |
| -0.059582644 | 0.965175 | 0.06032  |
| -0.583854931 | 0.888481 | 0.10213  |
| -0.561503528 | 0.835715 | -0.19377 |
| -0.606733123 | 0.955232 | -0.05333 |
| -0.349249953 | 0.944571 | 0.09145  |
| -0.450201092 | 0.987304 | -0.02278 |
| -0.816214846 | 0.988232 | 0.01123  |
| -0.246960245 | 0.939053 | 0.10466  |
| -1.6830475   | 0.680018 | -0.28625 |
| -0.799313123 | 0.873095 | -0.16831 |
| -0.337942508 | 0.871463 | -0.30007 |
| 0.0884378    | 0.967188 | -0.07662 |
| -0.298007791 | 0.863535 | -0.18402 |
| -0.473776467 | 0.984124 | -0.02323 |
| -0.333935497 | 0.972093 | -0.05441 |

|              |          |          |
|--------------|----------|----------|
| -0.218402565 | 0.914026 | -0.18334 |
| -0.49655703  | 0.951315 | -0.06489 |
| -0.04580369  | 0.980867 | -0.03807 |
| -0.097667686 | 0.83644  | 0.21424  |
| -0.342887714 | 0.997515 | -0.00397 |
| -0.264296527 | 0.951953 | 0.08231  |
| -0.384275246 | 0.915446 | 0.12287  |
| -0.180564126 | 0.905013 | 0.12479  |
| -0.351080544 | 0.952339 | -0.0869  |
| -0.345995855 | 0.995631 | 0.00635  |
| -0.304818437 | 0.975085 | -0.04332 |
| -0.125530882 | 0.946545 | -0.12553 |
| -0.152383773 | 0.984965 | 0.02691  |
| -0.451727309 | 0.903883 | 0.14388  |
| -0.710233915 | 0.827188 | 0.07585  |
| -0.272769732 | 0.768893 | 0.29891  |
| -0.50807275  | 0.986799 | -0.01229 |
| -0.474296381 | 0.946022 | 0.0437   |
| -0.339024089 | 0.935049 | -0.1428  |
| 0.445071222  | 0.757267 | 0.5685   |
| -0.701927459 | 0.929112 | -0.14227 |
| -0.567965842 | 0.904997 | 0.10395  |
| -0.777607579 | 0.938628 | 0.0761   |
| -0.294013247 | 0.873953 | 0.20139  |
| -0.408763868 | 0.941046 | 0.09745  |
| -2.169925001 | 0.717686 | -0.36257 |
| 0.276517635  | 0.808228 | -0.40828 |
| 0.584962501  | 0.885352 | 0.32193  |
| -0.042858649 | 0.854152 | 0.16764  |
| -0.423517015 | 0.955669 | 0.06602  |
| -0.46068547  | 0.823212 | -0.43787 |
| -0.413494015 | 0.875257 | 0.16611  |
| -2.233463034 | 0.967345 | -0.06879 |
| 0.112474729  | 0.77553  | 0.40526  |
| -0.647103235 | 0.991264 | -0.01106 |
| -0.345353944 | 0.960561 | -0.05561 |
| 0.281271773  | 0.668725 | 0.39092  |
| -0.373360316 | 0.810261 | -0.29785 |
| -0.605831144 | 0.998984 | 0.00143  |
| -1.752147466 | 0.874968 | -0.23579 |
| -0.110589264 | 0.987963 | 0.02194  |
| -0.366050648 | 0.7323   | -0.50714 |
| -0.997295791 | 0.849898 | -0.19897 |
| -0.631655736 | 0.756633 | -0.45542 |
| -0.736965594 | 0.917612 | 0.18057  |
| -0.855228476 | 0.89654  | -0.19265 |
| -0.266263927 | 0.992283 | -0.01169 |
| -0.655519212 | 0.97843  | -0.03105 |
| -0.260924058 | 0.977141 | -0.04274 |
| -1.30256277  | 0.931531 | 0.13927  |
| -0.927669312 | 0.805735 | -0.40395 |
| -0.875552629 | 0.971636 | -0.0507  |
| -0.069731764 | 0.949441 | 0.0905   |
| -0.371826752 | 0.976114 | 0.04106  |
| -0.649856029 | 0.843493 | 0.13717  |
| -0.485364903 | 0.916112 | 0.1101   |

|              |          |          |
|--------------|----------|----------|
| -0.339387997 | 0.977268 | -0.04704 |
| -0.3398838   | 0.99424  | 0.01292  |
| -0.68182404  | 0.494844 | -1.45943 |
| -0.352106244 | 0.942173 | -0.1129  |
| -0.501894039 | 0.948539 | -0.09008 |
| -0.15264625  | 0.958709 | 0.08798  |
| -0.334080833 | 0.902835 | 0.17175  |
| -0.599683058 | 0.971734 | 0.0458   |
| -0.38357273  | 0.883549 | 0.24467  |
| -0.414377982 | 0.90621  | -0.21209 |
| -0.082735062 | 0.912023 | -0.21289 |
| -0.502500341 | 0.837166 | 0.27511  |
| -0.301574563 | 0.865451 | 0.25516  |
| -0.54482311  | 0.948678 | -0.10893 |
| -0.342232191 | 0.956589 | -0.08888 |
| -0.108465995 | 0.985359 | -0.03182 |
| -1.063242434 | 0.896644 | 0.1775   |
| -0.340143332 | 0.971111 | -0.06331 |
| -0.530287521 | 0.785908 | 0.14483  |
| -0.125472149 | 0.925503 | 0.13556  |
| -2.177621396 | 0.950218 | 0.03842  |
| -0.286518175 | 0.937643 | -0.14667 |
| -0.196901116 | 0.943561 | 0.11294  |
| -0.252529969 | 0.894058 | 0.20585  |
| -0.235687693 | 0.910739 | -0.19677 |
| -0.440094375 | 0.902654 | 0.10997  |
| -1.734798572 | 0.838515 | -0.16617 |
| 0            | 0.450185 | #NUM!    |
| -0.420171874 | 0.998358 | 0.003    |
| -1.070534257 | 0.84121  | -0.33723 |
| -0.474142309 | 0.956407 | -0.09298 |
| -0.280900196 | 0.989244 | -0.02347 |
| -0.91753784  | 0.845612 | -0.3505  |
| -0.265344567 | 0.991446 | -0.01547 |
| -2           | 0.556212 | 1.16993  |
| -0.770529522 | 0.766606 | 0.08061  |
| -0.447601776 | 0.870284 | -0.27233 |
| -0.372113852 | 0.961725 | -0.07224 |
| -0.256151961 | 0.953507 | 0.09337  |
| -0.684694847 | 0.834501 | -0.31062 |
| -0.085469342 | 0.584503 | 0.6269   |
| -1.805571983 | 0.90268  | 0.15224  |
| -0.167727229 | 0.898147 | -0.23861 |
| 0            | 0.889735 | -0.32193 |
| -0.683912784 | 0.961165 | 0.05948  |
| 0.087321629  | 0.937982 | 0.12523  |
| -0.355111819 | 0.962492 | -0.07438 |
| -0.569493985 | 0.992051 | -0.01308 |
| -0.566992343 | 0.920323 | -0.15365 |
| -0.357695893 | 0.907594 | -0.183   |
| -0.404398692 | 0.960984 | 0.06514  |
| -0.267379876 | 0.959876 | 0.07914  |
| -0.489884335 | 0.914339 | -0.16702 |
| -0.087174959 | 0.977686 | 0.04332  |
| -0.049753035 | 0.976498 | -0.03895 |
| 0.11230297   | 0.957473 | 0.09954  |

|              |          |          |
|--------------|----------|----------|
| 1.358616492  | 0.731463 | 0.89218  |
| -0.757143476 | 0.879052 | -0.21883 |
| -0.065754445 | 0.963386 | -0.07513 |
| -0.275735227 | 0.978564 | -0.03991 |
| -0.187388076 | 0.98465  | -0.02479 |
| -0.221831879 | 0.788155 | 0.37744  |
| -0.701341684 | 0.960907 | 0.0635   |
| -0.030381264 | 0.950158 | 0.08276  |
| -0.406854295 | 0.990522 | -0.01485 |
| -0.835050594 | 0.785932 | -0.28681 |
| -0.155475724 | 0.994093 | -0.01042 |
| -0.087833381 | 0.965873 | -0.08076 |
| -0.263999742 | 0.987141 | -0.01943 |
| -0.232694977 | 0.917698 | 0.13949  |
| #NUM!        | 0.756486 | 0.58496  |
| -0.540568381 | 0.957949 | -0.06873 |
| -0.445381662 | 0.985525 | -0.02305 |
| -0.444066548 | 0.955499 | -0.08483 |
| -0.343872683 | 0.986095 | 0.02944  |
| -0.501546493 | 0.9889   | -0.01811 |
| -0.569661911 | 0.93813  | 0.04074  |
| -0.783598453 | 0.89711  | -0.10032 |
| -0.128584206 | 0.80184  | 0.20101  |
| -0.490535317 | 0.871022 | -0.25017 |
| -0.303505562 | 0.900923 | -0.22611 |
| -0.759585664 | 0.935859 | -0.11109 |
| -0.719892081 | 0.683621 | -0.70302 |
| -0.373257004 | 0.985593 | 0.02336  |
| -0.493535391 | 0.924852 | -0.16691 |
| -0.439973009 | 0.783356 | -0.50005 |
| -0.224215157 | 0.989451 | 0.02409  |
| -0.078496129 | 0.880443 | -0.2903  |
| -0.41327248  | 0.772597 | 0.31787  |
| -0.972955177 | 0.925968 | 0.13617  |
| -0.437482746 | 0.987333 | 0.02511  |
| -0.78956387  | 0.882057 | -0.23955 |
| -0.168716147 | 0.988963 | -0.02369 |
| -0.085469342 | 0.872072 | -0.29662 |
| -0.945138065 | 0.934284 | -0.12858 |
| -0.576405442 | 0.925124 | -0.16951 |
| 0.060808912  | 0.884961 | 0.17367  |
| -0.639761912 | 0.376838 | 0.26209  |
| -0.365084239 | 0.977855 | 0.03689  |
| -0.396312704 | 0.988877 | 0.01812  |
| -0.450576821 | 0.912057 | -0.17088 |
| -0.681396437 | 0.897082 | -0.17605 |
| -0.775682702 | 0.962581 | 0.07115  |
| -0.706049085 | 0.995725 | -0.00364 |
| -0.181305398 | 0.935006 | -0.13251 |
| -0.11521434  | 0.878179 | 0.23232  |
| -1.11189288  | 0.443332 | 1.06319  |
| -0.515899179 | 0.878599 | -0.2501  |
| -0.630472787 | 0.890919 | -0.07323 |
| -0.307819199 | 0.845297 | 0.25064  |
| -0.416291053 | 0.917405 | 0.1058   |
| -1.283401255 | 0.923039 | -0.1342  |

|              |           |          |
|--------------|-----------|----------|
| -0.120107175 | 0.860258  | 0.2383   |
| -0.840403139 | 0.858199  | -0.3067  |
| 0.163780261  | 1         | 0        |
| -0.342841395 | 0.920338  | -0.16226 |
| -0.584962501 | 0.462019  | -2.58496 |
| -2.201633861 | 0.775682  | -0.35364 |
| 1.639408435  | 0.736575  | 0.92405  |
| 0.007948753  | 0.984436  | 0.03309  |
| -0.219205296 | 0.972723  | -0.06755 |
| -0.35433079  | 0.906449  | -0.1811  |
| 3.584962501  | 0.856143  | 1.58496  |
| -0.156119202 | 0.968096  | -0.06044 |
| -0.525962611 | 0.902926  | -0.1797  |
| 0            | 0.897246  | -0.26919 |
| -0.15680408  | 0.963566  | -0.08387 |
| -1.175810285 | 0.981455  | -0.03076 |
| -1.510656942 | 0.831785  | 0.23584  |
| -2.303478032 | 0.0498822 | -0.55184 |
| -0.330286593 | 0.941109  | 0.07204  |
| -0.16549003  | 0.99091   | -0.0186  |
| -0.398772445 | 0.971337  | -0.05842 |
| -0.154386004 | 0.936769  | -0.13475 |
| 0.152003093  | 0.594901  | 0.83007  |
| 1.125641295  | 0.948163  | -0.16551 |
| 0.357607768  | 0.811444  | 0.32421  |
| -0.104676212 | 0.986842  | 0.02714  |
| 0            | 0.767174  | 0.35755  |
| -0.273084735 | 0.947361  | 0.09236  |
| #DIV/0!      | 0.545627  | #DIV/0!  |
| -0.467021243 | 0.876903  | -0.2666  |
| -1.169925001 | 0.504632  | -0.848   |
| -2.353636955 | 0.677189  | -0.66558 |
| -1.286881148 | 0.809742  | -0.30869 |
| -0.625371455 | 0.802972  | -0.45181 |
| -3.321928095 | 0.618095  | -0.78588 |
| 0.432959407  | 0.838686  | 0.29278  |
| -0.417938556 | 0.961547  | 0.07235  |
| -0.448043292 | 0.949636  | -0.08396 |
| -0.033028281 | 0.910512  | -0.20628 |
| -0.41807214  | 0.976325  | 0.03148  |
| -2.321928095 | 0.329316  | -1.32193 |
| 0.204699366  | 0.985038  | 0.03961  |
| -0.282813207 | 0.870268  | -0.28625 |
| -0.31937239  | 0.952601  | -0.10613 |
| -0.254622166 | 0.783281  | 0.36787  |
| -0.997663651 | 0.842821  | -0.27195 |
| -1.777607579 | 0.945175  | -0.09311 |
| 0.452402323  | 0.824442  | 0.35302  |
| -0.270288702 | 0.900515  | -0.22995 |
| -0.10922907  | 0.846711  | -0.37551 |
| -0.200256774 | 0.945682  | 0.11169  |
| -1.391540809 | 0.944296  | -0.09375 |
| -0.531776566 | 0.925841  | 0.13487  |
| 0.327574658  | 0.879449  | 0.30485  |
| -0.706739683 | 0.974136  | 0.04332  |
| 0.331549661  | 0.635955  | 0.81423  |

|              |          |          |
|--------------|----------|----------|
| -0.451375071 | 0.72384  | -0.65122 |
| 0.094899263  | 0.909514 | -0.22884 |
| -1.050040682 | 0.72377  | -0.53462 |
| 0.13422094   | 0.977305 | -0.05514 |
| -0.087462841 | 1        | 0        |
| -0.544320516 | 0.83513  | -0.40136 |
| -0.948161068 | 0.861418 | -0.29146 |
| #DIV/0!      | 1        | #DIV/0!  |
| -0.244355853 | 0.902821 | -0.2213  |
| #DIV/0!      | 0.450185 | #DIV/0!  |
| -0.307281319 | 0.872869 | -0.30728 |
| -0.207110621 | 0.694738 | 0.28853  |
| 0.16411938   | 0.992256 | 0.01728  |
| 0.639182892  | 0.747061 | 0.49852  |
| -0.318101626 | 0.961504 | -0.08072 |
| -0.957771765 | 0.715752 | -0.48162 |
| -0.223206813 | 0.92734  | -0.13832 |
| -0.18913734  | 0.992691 | 0.01587  |
| -0.730062734 | 0.873364 | -0.2494  |
| -0.016394438 | 0.935867 | -0.14118 |
| -0.959002628 | 0.827602 | -0.38236 |
| -0.226357718 | 0.870582 | 0.19228  |
| -0.413997923 | 0.989025 | -0.02038 |
| -0.525246032 | 0.972815 | 0.04249  |
| -0.649502753 | 0.826953 | 0.37156  |
| -0.77314793  | 0.833006 | -0.28011 |
| -0.388024548 | 0.94171  | -0.10906 |
| -0.211342791 | 0.980108 | -0.04546 |
| -0.741989494 | 0.789542 | -0.47013 |
| #NUM!        | 0.710482 | 0.41504  |
| 0.031047763  | 0.884822 | -0.29737 |
| 0.43198164   | 0.821991 | 0.42217  |
| -0.467119653 | 0.957007 | 0.07344  |
| -0.308086912 | 0.891814 | 0.20477  |
| -0.60268613  | 0.993709 | 0.01086  |
| -0.836394595 | 0.958802 | 0.08834  |
| 1.237039197  | 0.790729 | 0.44057  |
| -2.089203875 | 0.666329 | -0.68201 |
| #DIV/0!      | ?        | #DIV/0!  |
| -0.683526335 | 0.949501 | -0.11321 |
| -0.546839587 | 0.994522 | 0.0084   |
| -0.222392421 | 0.301733 | 1.09954  |
| -0.681816825 | 0.877904 | -0.09963 |
| -0.914731459 | 0.854626 | -0.20254 |
| 0.563424216  | 0.814011 | 0.3992   |
| -0.668613418 | 0.732824 | -0.48844 |
| -0.803537375 | 0.977801 | -0.03367 |
| -0.541394872 | 0.880333 | -0.24079 |
| -0.927068478 | 0.871125 | -0.182   |
| -1           | 0.657795 | -0.58496 |
| -0.422423758 | 0.860172 | -0.30089 |
| 0.328222064  | 0.898492 | 0.20857  |
| -2.26589406  | 0.480914 | -1.02159 |
| -0.483378999 | 0.99203  | -0.01176 |
| 0.56628108   | 0.842019 | -0.38663 |
| -0.202174003 | 0.995062 | -0.00862 |

|              |           |          |
|--------------|-----------|----------|
| -0.781699893 | 0.952443  | 0.06374  |
| -1.335897279 | 0.826795  | -0.32038 |
| -0.601450624 | 0.95966   | -0.06839 |
| -0.373123858 | 0.924181  | 0.14018  |
| -0.292374649 | 0.940782  | -0.1306  |
| -0.480408315 | 0.998426  | 0.00354  |
| -1.448177484 | 0.945083  | 0.11787  |
| -0.558743866 | 0.898476  | -0.24326 |
| -0.333372118 | 0.920734  | -0.19498 |
| -0.726764084 | 0.829644  | -0.38722 |
| -0.44730806  | 0.977495  | -0.05126 |
| -1.204786433 | 0.809535  | -0.41876 |
| -0.503039193 | 0.991857  | -0.01449 |
| -0.445924545 | 0.945171  | -0.08701 |
| -0.322774002 | 0.994962  | 0.00947  |
| -0.517607233 | 0.888403  | 0.13654  |
| -0.549471708 | 0.999999  | 0        |
| -0.559427409 | 0.827238  | -0.41504 |
| -0.493814613 | 0.976245  | 0.04461  |
| -0.403372657 | 0.91404   | 0.14316  |
| -2.321928095 | 0.508096  | 0.61667  |
| -0.341929951 | 0.99733   | 0.00446  |
| -0.569423062 | 0.968896  | -0.0501  |
| -0.46116667  | 0.900032  | 0.12746  |
| -0.273018494 | 0.950946  | 0.09073  |
| -0.457725678 | 0.919337  | -0.14931 |
| 1.054447784  | 0.848232  | 0.4011   |
| 1.632445659  | 0.693829  | 0.92169  |
| -0.016126447 | 0.947846  | 0.11262  |
| -0.665895005 | 0.912964  | 0.13288  |
| -0.979822118 | 0.963761  | -0.06228 |
| #DIV/0!      | 0.0805096 | #DIV/0!  |
| -0.300353999 | 0.940039  | 0.09872  |
| -0.469775302 | 0.980473  | -0.02338 |
| 0            | 0.626158  | 0.90689  |
| -3.459431619 | 0.0344509 | -3.45943 |
| -0.415037499 | 0.320255  | #NUM!    |
| -0.323772581 | 0.93353   | -0.14193 |
| -0.329216694 | 0.886449  | 0.21018  |
| -0.271302022 | 0.838233  | -0.39232 |
| -0.530484499 | 0.852038  | 0.27404  |
| -0.271641631 | 0.981315  | -0.03639 |
| -0.071031239 | 0.934262  | 0.12218  |
| -0.552688545 | 0.923308  | -0.15274 |
| -0.011653648 | 0.958679  | 0.07801  |
| -0.22668335  | 0.947468  | 0.07981  |
| -0.094620788 | 0.940138  | 0.09619  |
| -0.401362562 | 0.968612  | -0.04607 |
| -0.604071324 | 0.90866   | -0.21818 |
| -1.1534817   | 0.981884  | 0.03447  |
| -1.736009195 | 0.779873  | -0.4354  |
| -0.394842235 | 0.702846  | -0.67152 |
| -0.286438623 | 0.936107  | -0.10611 |
| -0.405840758 | 0.970982  | -0.04919 |
| -0.187318313 | 0.918683  | -0.16618 |
| -0.296617006 | 0.970692  | -0.05834 |

|              |          |          |
|--------------|----------|----------|
| -0.44380362  | 0.890653 | -0.2249  |
| -0.316108765 | 0.856669 | 0.18452  |
| -0.207804885 | 0.990232 | -0.01622 |
| -0.283587434 | 0.967521 | 0.05413  |
| -0.557827113 | 0.936729 | -0.11328 |
| -0.451019207 | 0.858203 | -0.24653 |
| -0.325297342 | 0.750112 | 0.24453  |
| 0.203274966  | 0.996237 | 0.00904  |
| -0.569709779 | 0.997014 | 0.00487  |
| -0.048673847 | 0.948941 | -0.11377 |
| -0.398757863 | 0.977048 | 0.04337  |
| 2.070389328  | 0.384793 | 1.848    |
| -0.601264313 | 0.944884 | -0.12996 |
| -0.465190312 | 0.973782 | -0.04011 |
| -0.452842174 | 0.943971 | 0.04757  |
| -0.557025624 | 0.763268 | 0.16724  |
| -0.33868194  | 0.926726 | 0.09345  |
| -0.474823482 | 0.945024 | -0.09724 |
| -0.456420882 | 0.93357  | 0.0713   |
| -0.393790914 | 0.836968 | 0.19889  |
| -0.836544837 | 0.793665 | -0.1248  |
| -0.197241972 | 0.270294 | 0.57229  |
| -0.5804702   | 0.968889 | -0.02008 |
| -0.822603749 | 0.710785 | -0.16404 |
| -0.357880266 | 0.978383 | 0.02569  |
| -0.786426118 | 0.988903 | -0.00467 |
| -0.387627321 | 0.44309  | 0.38471  |
| -0.423909903 | 0.959081 | -0.08189 |
| -0.612676042 | 0.929748 | -0.12234 |
| -0.531429697 | 0.897657 | -0.11788 |
| -0.394334219 | 0.978277 | 0.03378  |
| -0.379070434 | 0.791137 | 0.18557  |
| -0.788495895 | 0.922055 | -0.16046 |
| -0.285444592 | 0.805695 | 0.25192  |
| -0.471229367 | 0.990148 | -0.01825 |
| -3.86507042  | 0.341939 | -3.67243 |
| -0.388776449 | 0.998682 | 0.00268  |
| -0.26122878  | 0.9365   | 0.09441  |
| 0.19454677   | 0.991521 | 0.01654  |
| -0.458321597 | 0.936585 | -0.13201 |
| -0.337789969 | 0.75731  | -0.40836 |
| -0.506737333 | 0.971331 | -0.06048 |
| -0.201563143 | 0.971464 | 0.03907  |
| -0.71649295  | 0.940903 | 0.02203  |
| -0.031026896 | 0.714393 | 0.54194  |
| -0.789320999 | 0.412341 | -1.67868 |
| -0.387917922 | 0.96846  | 0.05175  |
| -1.52177069  | 0.607737 | -0.80273 |
| -0.321584964 | 0.935078 | -0.12615 |
| -0.94254118  | 0.907661 | -0.10001 |
| -0.137503524 | 0.775228 | -0.65208 |
| 0.299560282  | 0.735025 | -0.53051 |
| -0.473677201 | 0.96482  | -0.08328 |
| -2           | 0.633442 | -0.77761 |
| -1.725270455 | 0.377628 | -1.20572 |
| -1.73289593  | 0.912923 | -0.1822  |



|              |          |          |
|--------------|----------|----------|
| -0.321928095 | 0.273013 | 1.26303  |
| -0.636991273 | 0.904791 | 0.07053  |
| -0.639733303 | 0.976085 | -0.03055 |
| -0.218564018 | 0.794591 | 0.27405  |
| -0.470778693 | 0.901568 | -0.19668 |
| -0.0629926   | 0.530277 | 0.88893  |
| -0.795880617 | 0.940319 | -0.07325 |
| -0.597699959 | 0.918436 | -0.106   |
| -1.432959407 | 0.935453 | -0.05445 |
| -0.628273048 | 0.800813 | -0.47177 |
| -0.29455432  | 0.926956 | -0.12734 |
| -0.807354922 | 0.673442 | -0.57032 |
| -0.080731272 | 0.764018 | -0.58496 |
| -0.685435294 | 0.937813 | 0.12071  |
| -0.550662043 | 0.902111 | -0.17142 |
| -0.314873337 | 0.844277 | 0.20068  |
| -1.062927039 | 0.94504  | -0.04437 |
| -0.477393577 | 0.9754   | 0.0272   |
| -0.388565288 | 0.951446 | -0.10384 |
| -0.308906369 | 0.967673 | -0.07115 |
| 1.24725301   | 0.691597 | 0.99261  |
| -1.037390246 | 0.816591 | 0.37765  |
| -0.255496234 | 0.984048 | -0.03321 |
| -0.470215759 | 0.841754 | -0.31365 |
| -0.467358534 | 0.892936 | 0.16655  |
| -0.681309577 | 0.977052 | 0.01678  |
| 0.018219721  | 0.727354 | 0.30348  |
| -0.543014806 | 0.86874  | 0.16846  |
| -0.772797003 | 0.929511 | 0.04442  |
| -0.925232232 | 0.813249 | -0.23912 |
| -0.238270166 | 0.732698 | 0.36204  |
| -0.585723938 | 0.951769 | 0.03608  |
| -0.376648994 | 1        | 0        |
| -0.283711822 | 0.621495 | 0.4391   |
| -0.07180061  | 0.778479 | 0.31275  |
| 1            | 1        | 0        |
| -0.495697846 | 0.96486  | 0.07387  |
| -0.576408784 | 0.884423 | -0.24115 |
| -0.082260596 | 0.964365 | 0.06996  |
| -0.368353708 | 0.97465  | 0.04273  |
| -0.258080942 | 0.948289 | 0.09656  |
| -0.317770469 | 0.976117 | 0.04054  |
| -0.592316396 | 0.901318 | 0.20206  |
| -0.908783482 | 0.849958 | -0.31229 |
| 0.096282228  | 0.80663  | 0.41062  |
| -0.086776443 | 0.952994 | 0.06445  |
| -0.353474382 | 0.969659 | -0.06538 |
| -0.173263493 | 0.790423 | -0.54757 |
| -0.302070409 | 0.98394  | 0.02425  |
| -0.48606603  | 0.976641 | -0.04379 |
| -0.655597256 | 0.914175 | -0.14135 |
| -0.388017285 | 0.932372 | 0.10697  |
| -0.373047124 | 0.974166 | -0.04602 |
| -0.211229109 | 0.990241 | -0.01987 |
| -0.01577326  | 0.989118 | 0.02361  |
| -1.054447784 | 0.293425 | 0.9437   |

|              |           |          |
|--------------|-----------|----------|
| -1.197939378 | 0.626083  | -0.96347 |
| -0.290623341 | 0.982798  | 0.03376  |
| -0.34013269  | 0.992645  | -0.01668 |
| -2.67379033  | 0.797668  | -0.32965 |
| -2.025568223 | 0.765696  | 0.12347  |
| -0.324508407 | 0.931726  | 0.10518  |
| -0.282262083 | 0.941902  | 0.10854  |
| -0.350170389 | 0.918156  | -0.18747 |
| -0.628031223 | 0.851698  | -0.38702 |
| #NUM!        | 0.308068  | #NUM!    |
| 0.191141487  | 0.878079  | -0.26303 |
| -0.082856932 | 0.954678  | 0.0847   |
| 0.176877762  | 0.775745  | 0.38333  |
| -0.503299649 | 0.851539  | 0.17966  |
| -0.439172366 | 0.921705  | -0.14721 |
| -0.281634823 | 0.849741  | -0.35762 |
| -0.239864975 | 0.954552  | -0.09548 |
| -0.548759826 | 0.892736  | 0.10875  |
| -0.571675346 | 0.993717  | -0.00904 |
| -0.521860614 | 0.950361  | -0.08759 |
| -1.051761428 | 0.984096  | -0.02134 |
| -2.013605495 | 0.939259  | -0.09248 |
| -0.424115299 | 0.983218  | 0.02693  |
| -0.339252193 | 0.919882  | -0.17952 |
| -0.194182677 | 0.943726  | -0.09255 |
| -0.33251745  | 0.720617  | 0.35438  |
| -0.617118081 | 0.982861  | 0.02524  |
| -0.519083548 | 0.886833  | -0.21592 |
| -0.371872677 | 0.92034   | -0.16079 |
| -0.744505829 | 0.961961  | -0.07636 |
| -0.486394095 | 0.899768  | -0.22321 |
| -0.403132661 | 0.966496  | 0.05765  |
| -0.491075636 | 0.917275  | 0.12724  |
| -0.510820513 | 0.971114  | -0.05154 |
| -0.335244059 | 0.946174  | -0.11014 |
| -0.433445875 | 0.97287   | -0.05051 |
| 0.512648296  | 0.972178  | 0.07496  |
| -0.582373462 | 0.956131  | -0.05007 |
| -0.313689985 | 0.96605   | 0.06265  |
| -0.365470664 | 0.966371  | 0.05851  |
| -0.408599237 | 0.960393  | -0.07624 |
| -0.859197809 | 0.995559  | -0.00737 |
| -0.624314421 | 0.985769  | 0.02311  |
| -0.74122884  | 0.93909   | -0.08484 |
| -0.080905447 | 0.886184  | 0.24374  |
| -0.344529524 | 0.871964  | 0.1462   |
| #DIV/0!      | 0.0714215 | #DIV/0!  |
| -0.553807978 | 0.912501  | -0.16282 |
| -0.705695293 | 0.705069  | -0.44946 |
| -0.319341847 | 0.96957   | -0.04202 |
| -0.681845259 | 0.970048  | 0.02774  |
| -0.943416472 | 0.878109  | 0.08406  |
| -0.574316447 | 0.993761  | 0.00933  |
| -0.430324477 | 0.922262  | 0.13965  |
| -0.487815824 | 0.922956  | -0.13068 |
| -0.490867985 | 0.952975  | -0.10301 |

|              |           |          |
|--------------|-----------|----------|
| -0.024750793 | 0.96158   | 0.08922  |
| -2.38466385  | 0.0124977 | -3.23266 |
| -2.887525271 | 0.576845  | -0.68589 |
| -0.395963524 | 0.957597  | 0.08173  |
| 0.101861976  | 0.976727  | 0.05407  |
| -0.446797438 | 0.921369  | -0.17751 |
| -0.217965051 | 0.969275  | 0.0643   |
| -0.50779464  | 0.980247  | -0.03747 |
| 0            | 0.508305  | 1.27302  |
| -0.497663195 | 0.967731  | 0.04522  |
| -0.802741984 | 0.906512  | -0.11588 |
| -0.471136814 | 0.784029  | -0.25488 |
| -0.567118747 | 0.926698  | -0.08813 |
| -0.231311901 | 0.88191   | 0.15489  |
| -0.349536756 | 0.915895  | -0.17585 |
| -0.622554389 | 0.970251  | -0.04302 |
| -0.299560282 | 0.927349  | -0.15287 |
| -1.276648523 | 0.807062  | -0.40269 |
| -1.822923725 | 0.578614  | -1.06601 |
| -1.321928095 | 0.407544  | -2.32193 |
| -0.441598326 | 0.883864  | 0.19444  |
| -0.129338643 | 0.996596  | -0.00803 |
| 0.526326623  | 0.7937    | 0.47191  |
| -0.886915029 | 0.852045  | -0.27552 |
| -0.454443416 | 0.905338  | -0.163   |
| -0.784271309 | 0.777742  | -0.56188 |
| -0.36958476  | 0.858557  | 0.19876  |
| -0.160928065 | 0.994778  | -0.01186 |
| -0.236289814 | 0.980682  | 0.0332   |
| -0.563540249 | 0.813685  | 0.26366  |
| -0.385996819 | 0.976272  | -0.04619 |
| -0.459812821 | 0.857511  | -0.2445  |
| -0.140309694 | 0.941377  | 0.11796  |
| -0.237188187 | 0.991999  | -0.01467 |
| -0.763784853 | 0.992045  | 0.01239  |
| -0.431502555 | 0.999888  | 0.00019  |
| -0.821805052 | 0.971227  | -0.0498  |
| -0.627685602 | 0.840859  | -0.32111 |
| -1.411582884 | 0.836814  | 0.23471  |
| -0.678410662 | 0.783546  | -0.36508 |
| -1.162538323 | 0.751839  | 0.48382  |
| -0.172013054 | 0.921224  | -0.1375  |
| -0.109161455 | 0.961418  | 0.08059  |
| -0.144132101 | 0.994482  | 0.01098  |
| 0.225703418  | 0.953216  | 0.09766  |
| -0.883961459 | 0.719035  | -0.68051 |
| -0.302767624 | 0.936807  | -0.14782 |
| -1.796282023 | 0.897788  | -0.18509 |
| -0.186585572 | 0.925283  | -0.15841 |
| -0.377514057 | 0.90666   | 0.12357  |
| -0.42946457  | 0.962287  | -0.0793  |
| -0.073691951 | 0.956492  | 0.08953  |
| -1.099535674 | 0.848062  | -0.32193 |
| 0.36923381   | 0.971902  | 0.05889  |
| -0.257387843 | 0.971985  | 0.06454  |
| -0.427389014 | 0.999425  | -0.00093 |

|              |           |          |
|--------------|-----------|----------|
| -0.416976345 | 0.986337  | 0.02135  |
| -0.282738277 | 0.920907  | 0.12155  |
| -0.103856299 | 0.988128  | -0.02774 |
| -0.960458931 | 0.883988  | -0.17374 |
| -0.09535268  | 0.746058  | 0.67103  |
| -0.523186303 | 0.627757  | 0.38773  |
| -0.776443646 | 0.981419  | -0.02743 |
| -1.584962501 | 0.277674  | -0.90689 |
| -0.741265732 | 0.510523  | -0.54057 |
| 0.116844021  | 0.83529   | -0.41206 |
| 0.612574732  | 0.771319  | 0.49881  |
| -0.237205416 | 0.979115  | -0.04346 |
| -0.353689052 | 0.979028  | 0.0475   |
| -0.59454855  | 0.966272  | -0.04242 |
| -0.413207365 | 0.967801  | -0.07171 |
| 1.311006546  | 0.714148  | 0.94879  |
| #NUM!        | 1         | 0        |
| -1           | 0.0877066 | 1.80735  |
| -0.166507239 | 0.748583  | 0.32507  |
| -0.450025697 | 0.977682  | 0.02865  |
| -0.366069962 | 0.983424  | -0.03251 |
| -0.377175087 | 0.898567  | 0.11382  |
| -0.424095256 | 0.821145  | 0.26752  |
| -0.346912428 | 0.955996  | -0.08525 |
| -0.423570575 | 0.887458  | 0.14225  |
| -0.42351607  | 0.980851  | -0.03649 |
| -0.368570459 | 0.912817  | -0.17644 |
| -0.438473417 | 0.994714  | -0.00984 |
| -0.446067731 | 0.933995  | -0.13975 |
| #NUM!        | 0.308068  | #NUM!    |
| -0.621600535 | 0.996096  | -0.00502 |
| 0.085485685  | 0.777366  | 0.33174  |
| -0.467602133 | 0.789523  | 0.29597  |
| -0.286577092 | 0.926965  | 0.11174  |
| -0.675727965 | 0.995448  | 0.00702  |
| #NUM!        | 1         | 0        |
| -0.311627174 | 0.997907  | -0.0046  |
| -0.479992941 | 0.928116  | -0.14296 |
| 0.273984705  | 0.972351  | -0.04863 |
| -1.52666386  | 0.690186  | -0.63798 |
| #DIV/0!      | ?         | #DIV/0!  |
| -0.232829677 | 0.922587  | -0.12445 |
| -0.384850593 | 0.9643    | -0.08539 |
| -0.126093885 | 0.841847  | -0.34062 |
| -0.384100518 | 0.921753  | -0.14947 |
| -0.103835811 | 0.985566  | 0.0199   |
| 1.118897847  | 0.699496  | 0.69171  |
| -0.086674411 | 0.808214  | -0.42206 |
| -0.819845866 | 0.950051  | -0.08539 |
| #DIV/0!      | 0.308068  | #DIV/0!  |
| #DIV/0!      | ?         | #DIV/0!  |
| -0.416813124 | 0.868939  | -0.22884 |
| -1.336464188 | 0.757732  | -0.5581  |
| -0.72062523  | 0.942451  | 0.06255  |
| -0.342493287 | 0.969262  | 0.06174  |
| -0.30392395  | 0.972722  | -0.05055 |

|              |          |          |
|--------------|----------|----------|
| -0.722821412 | 0.978815 | 0.02641  |
| -0.823122238 | 0.344206 | -1.20163 |
| -0.910245347 | 0.956178 | -0.08275 |
| -1.344142829 | 0.771485 | 0.44353  |
| -0.605669982 | 0.831724 | -0.40411 |
| -0.371603146 | 0.940562 | -0.1217  |
| -0.371416659 | 0.914093 | -0.18311 |
| -0.330723466 | 0.968545 | -0.05467 |
| -0.264570005 | 0.976186 | -0.04944 |
| -0.482420068 | 0.792193 | 0.18556  |
| -0.299393121 | 0.83247  | 0.19772  |
| -0.722343886 | 0.849623 | 0.11295  |
| -0.382151958 | 0.833097 | 0.18676  |
| -0.658577565 | 0.969607 | -0.03113 |
| -0.754543239 | 0.844675 | 0.11012  |
| -0.630009619 | 0.859467 | 0.10627  |
| -0.819708737 | 0.873747 | -0.05315 |
| -0.727472185 | 0.936919 | 0.04496  |
| -0.76897255  | 0.8484   | 0.1106   |
| -0.889218029 | 0.745374 | -0.12843 |
| -0.694678608 | 0.984334 | 0.0119   |
| -0.575085712 | 0.88883  | 0.13374  |
| -0.569412987 | 0.941745 | 0.07043  |
| -0.425860178 | 0.899637 | 0.11799  |
| -0.442490712 | 0.711667 | 0.28187  |
| -0.709005415 | 0.854312 | 0.09933  |
| -0.479180725 | 0.895121 | 0.12515  |
| -0.655239393 | 0.962903 | -0.05791 |
| -0.857586562 | 0.79125  | -0.1326  |
| -0.826366073 | 0.986795 | 0.01186  |
| -0.677975439 | 0.939006 | -0.06512 |
| -0.423650426 | 0.865899 | 0.14863  |
| -0.593904988 | 0.977294 | 0.02692  |
| -0.587565782 | 0.940313 | 0.06964  |
| -0.833121891 | 0.94932  | -0.05608 |
| -0.293719788 | 0.983436 | -0.02679 |
| -0.46319673  | 0.56978  | 0.40854  |
| -0.416139815 | 0.894591 | 0.12781  |
| -0.685638194 | 0.955213 | 0.04217  |
| -0.527088674 | 0.981526 | -0.02729 |
| -0.435847687 | 0.915332 | -0.18565 |
| -0.318162334 | 0.923718 | 0.11188  |
| -0.406588309 | 0.969725 | -0.0456  |
| -0.585292524 | 0.962769 | -0.04219 |
| -0.392329213 | 0.992086 | -0.00832 |
| -1.046637711 | 0.74645  | -0.12846 |
| -0.523705494 | 0.866273 | 0.1991   |
| -1.188519815 | 0.922897 | 0.08425  |
| -0.427417701 | 0.656643 | 0.34048  |
| 0.163498732  | 0.937599 | -0.12029 |
| -1.115477217 | 0.655718 | -0.89308 |
| -1.584962501 | 0.62679  | -0.87447 |
| -0.192074279 | 0.982317 | -0.04053 |
| -0.224187064 | 0.968985 | -0.05969 |
| -0.658872258 | 0.915994 | 0.13106  |
| -0.268703156 | 0.841256 | -0.36257 |

|              |          |          |
|--------------|----------|----------|
| -0.360322453 | 0.979186 | -0.03486 |
| -0.391657754 | 0.970467 | -0.04251 |
| -0.457681837 | 0.972968 | -0.04763 |
| 0.598971552  | 0.939633 | 0.17068  |
| -0.16502876  | 0.907699 | -0.20738 |
| -0.451240174 | 0.808341 | -0.46487 |
| -1.807354922 | 0.777982 | -0.41504 |
| -0.174680839 | 0.826075 | 0.33773  |
| -0.44018759  | 0.974813 | -0.04935 |
| -0.390559111 | 0.929891 | -0.14958 |
| -0.398930246 | 0.920297 | -0.11687 |
| -1.456638404 | 0.663725 | -0.6893  |
| -0.364470798 | 0.934209 | -0.13252 |
| 1.437405312  | 0.76673  | 0.68182  |
| -0.547687151 | 0.913231 | 0.11488  |
| 0.247092862  | 0.915786 | 0.17871  |
| -0.398433589 | 0.989788 | 0.02107  |
| -0.6621439   | 0.970955 | -0.04251 |
| -0.195980791 | 0.998591 | 0.0025   |
| -0.116808322 | 0.984447 | -0.03242 |
| -0.713118852 | 0.5832   | -1.18442 |
| -0.584962501 | 0.785812 | -0.58496 |
| -1.155278225 | 0.707055 | -0.75673 |
| -0.019808481 | 0.682309 | -0.55254 |
| 0.012232258  | 0.882978 | 0.24018  |
| 0.920565533  | 0.884499 | 0.31504  |
| -0.721175292 | 0.885153 | -0.19176 |
| -0.434980207 | 0.32792  | 0.60795  |
| -2.257916878 | 0.925078 | -0.10606 |
| -0.330249205 | 0.921968 | 0.13527  |
| -0.308775707 | 0.959831 | 0.06508  |
| -0.353314586 | 0.917858 | 0.1414   |
| -0.113163352 | 0.969359 | -0.0615  |
| 0.057551023  | 0.740233 | 0.4441   |
| -0.347166597 | 0.934023 | -0.12114 |
| 0.197939378  | 0.587506 | 0.61298  |
| -0.51364853  | 0.892598 | -0.20509 |
| -0.618584361 | 0.934014 | -0.13159 |
| -0.406862567 | 0.967268 | -0.06769 |
| -0.546956709 | 0.89897  | -0.2076  |
| -0.740909051 | 0.944295 | -0.11058 |
| -0.334158384 | 0.811659 | -0.47497 |
| -0.433921846 | 0.982551 | 0.0248   |
| -0.600325315 | 0.845763 | -0.33695 |
| 0.050626073  | 0.961225 | 0.08342  |
| -0.060717289 | 0.936805 | -0.14814 |
| -1.455451768 | 0.913075 | -0.16744 |
| -0.600252372 | 0.814403 | -0.34713 |
| 0            | 0.787185 | 0.36059  |
| -0.895769038 | 0.989563 | 0.01279  |
| -0.327369936 | 0.939863 | 0.11332  |
| -0.33207605  | 0.935458 | -0.16152 |
| -0.409390936 | 0.700599 | -0.70895 |
| -0.786130164 | 0.86588  | -0.30528 |
| -1.353264646 | 0.914693 | -0.16115 |
| -0.389219186 | 0.90281  | 0.19277  |

|              |          |          |
|--------------|----------|----------|
| -0.901186456 | 0.803133 | -0.44544 |
| 0.151374605  | 0.929223 | 0.16937  |
| -0.230731513 | 0.860523 | -0.31349 |
| -1.209461842 | 0.658505 | -0.81863 |
| -1.424411052 | 0.898407 | -0.19571 |
| -1.532793537 | 0.991475 | -0.01709 |
| -0.687648165 | 0.476452 | -1.97453 |
| -1.922832139 | 0.894415 | 0.16945  |
| -0.434438822 | 0.971593 | -0.06439 |
| 0.457959085  | 0.853659 | -0.46658 |
| -0.958406774 | 0.807921 | 0.36603  |
| 0.361833829  | 0.571898 | 0.96269  |
| -0.804469531 | 0.975345 | -0.03804 |
| -0.572021335 | 0.650618 | 0.28826  |
| -0.722586455 | 0.930795 | 0.04349  |
| -0.141694075 | 0.737521 | 0.25499  |
| -0.37036845  | 0.798157 | 0.21694  |
| 0.096811961  | 0.808859 | 0.18831  |
| -0.776986931 | 0.662829 | -0.579   |
| -0.504469218 | 0.905392 | 0.10969  |
| -0.339854493 | 0.993157 | -0.01289 |
| -0.332929009 | 0.950156 | -0.10906 |
| -0.278301162 | 0.955189 | 0.08199  |
| -0.481744303 | 0.891508 | 0.17765  |
| -0.232660757 | 0.969549 | 0.06012  |
| -0.451787052 | 0.912218 | 0.12872  |
| -0.462313111 | 0.934418 | -0.12    |
| -0.341678587 | 0.996922 | 0.00591  |
| -0.179821038 | 0.906334 | 0.1819   |
| 0.10842246   | 0.858276 | 0.26889  |
| 1.32483969   | 0.51507  | 1.152    |
| -0.921960661 | 0.960607 | -0.07733 |
| -0.576005607 | 0.78871  | -0.42707 |
| -0.454486686 | 0.979767 | -0.0325  |
| -0.400263842 | 0.98384  | 0.02711  |
| -0.602828922 | 0.939411 | -0.11869 |
| -0.376366048 | 0.923982 | 0.11964  |
| -0.366326675 | 0.906215 | -0.22261 |
| -0.983636554 | 0.940844 | 0.13601  |
| -0.401223924 | 0.907688 | 0.17074  |
| -0.760552414 | 0.903775 | -0.11311 |
| -0.506557531 | 0.999816 | -0.00027 |
| -0.506812985 | 0.971816 | 0.03654  |
| -0.889724741 | 0.736184 | -0.19179 |
| -0.272967001 | 0.884514 | 0.18704  |
| -0.33329839  | 0.955612 | -0.05818 |
| -0.471322673 | 0.911338 | -0.17591 |
| -0.574167298 | 0.965893 | -0.04082 |
| 0.129283017  | 0.744579 | 0.59694  |
| -1.540568381 | 0.484842 | -1.41504 |
| -1.378511623 | 0.78694  | 0.38702  |
| -0.185993813 | 0.944275 | 0.1296   |
| -1.133678435 | 0.808473 | -0.3485  |
| -2           | 0.585386 | 0.90689  |
| -0.690044547 | 0.902263 | -0.19094 |
| -0.456271278 | 0.366433 | 0.49721  |

|              |          |          |
|--------------|----------|----------|
| -0.892275267 | 0.941646 | -0.10935 |
| -0.559119225 | 0.988954 | -0.01622 |
| -0.135484356 | 0.803545 | 0.25628  |
| -0.353636955 | 0.992793 | -0.01295 |
| -0.441526835 | 0.996524 | 0.00665  |
| -0.235636698 | 0.977838 | -0.03876 |
| -0.799217873 | 0.698214 | -0.68987 |
| -0.410547004 | 0.888617 | -0.19215 |
| -0.387107647 | 0.98544  | -0.02438 |
| -0.135777619 | 0.982215 | 0.03638  |
| -0.385998243 | 0.976603 | 0.03611  |
| -0.366295118 | 0.921435 | 0.11461  |
| -0.404438546 | 0.99703  | -0.00442 |
| -0.832242356 | 0.823099 | 0.2229   |
| -0.03876957  | 0.987737 | 0.02349  |
| -0.752201847 | 0.808932 | 0.16889  |
| -0.228037606 | 0.874112 | -0.28509 |
| -0.448917735 | 0.899692 | -0.18351 |
| -0.677379467 | 0.920442 | 0.05803  |
| -0.522601457 | 0.930742 | -0.09407 |
| -0.120128857 | 0.572313 | 0.50737  |
| -0.727540581 | 0.972193 | -0.05788 |
| 1            | 0.281682 | 2.32193  |
| -0.120808472 | 0.864141 | 0.28843  |
| #DIV/0!      | ?        | #DIV/0!  |
| -1.75802721  | 0.929083 | 0.11644  |
| -0.371968777 | 0.80022  | 0.44746  |
| 0.227784033  | 0.88009  | 0.22662  |
| -1.271761946 | 0.98194  | 0.03459  |
| -1.006919414 | 0.560635 | -1.1838  |
| -1.495365064 | 0.622504 | -1.0166  |
| -1.841640072 | 0.976094 | 0.02409  |
| -0.435932724 | 0.954929 | -0.09564 |
| -0.565411065 | 0.814211 | 0.26306  |
| -0.620696712 | 0.735193 | -0.67837 |
| -1.713577547 | 0.785152 | 0.33952  |
| #NUM!        | 0.18169  | -1.58496 |
| -0.041661262 | 0.96955  | 0.05409  |
| -0.342563533 | 0.895302 | -0.23058 |
| -1.054447784 | 0.680382 | -0.75489 |
| -0.841326906 | 0.964851 | -0.03807 |
| -1.169925001 | 0.695852 | -0.30533 |
| -0.498525216 | 0.890468 | -0.22622 |
| -0.790229105 | 0.88849  | -0.18581 |
| -0.54811748  | 0.867147 | 0.1367   |
| -0.941106311 | 0.878111 | -0.26303 |
| -0.450776882 | 0.998822 | -0.00231 |
| -0.039528364 | 0.495231 | 0.87801  |
| -0.430531275 | 0.984573 | 0.02352  |
| -0.374096929 | 0.883662 | -0.28267 |
| 0.130528915  | 0.84363  | 0.28393  |
| -0.536280562 | 0.952752 | -0.09467 |
| -0.52650277  | 0.954734 | -0.0602  |
| -0.311940498 | 0.982718 | 0.02932  |
| -0.690757165 | 0.951649 | -0.08152 |
| -0.855390619 | 0.839246 | 0.23868  |



|              |          |          |
|--------------|----------|----------|
| -0.436564059 | 0.989704 | -0.01412 |
| -1.445799753 | 0.929602 | -0.05585 |
| -0.81868386  | 0.973719 | -0.04268 |
| -0.445167844 | 0.94676  | 0.06029  |
| -0.565419764 | 0.985201 | 0.02094  |
| -0.094381652 | 0.977775 | -0.04694 |
| -0.115384347 | 0.994044 | -0.014   |
| -0.303765517 | 0.895994 | 0.19228  |
| -0.11970839  | 0.920666 | -0.19265 |
| -0.374868452 | 0.979834 | -0.04257 |
| -0.451006544 | 0.957326 | -0.064   |
| -1.378511623 | 0.151621 | -3.70044 |
| -0.384357968 | 0.866336 | 0.17042  |
| -0.242173349 | 0.807501 | -0.33609 |
| -0.604233067 | 0.948581 | -0.07354 |
| -0.481834557 | 0.893362 | -0.13172 |
| -0.433087539 | 0.925822 | 0.08942  |
| -0.644659696 | 0.857608 | -0.32193 |
| -0.406383034 | 0.90736  | 0.16083  |
| -0.755419254 | 0.790424 | 0.14808  |
| -1.38416989  | 0.453753 | -0.80691 |
| 0.026279325  | 0.866866 | 0.20869  |
| -0.23141945  | 0.872182 | 0.18425  |
| -0.475480009 | 0.980863 | -0.03129 |
| -0.864779222 | 0.948486 | -0.09395 |
| -0.16152256  | 0.868098 | -0.29301 |
| -0.038756043 | 0.816778 | 0.28317  |
| -0.666854478 | 0.941775 | -0.09637 |
| -0.395091593 | 0.946278 | 0.0938   |
| -1.240432977 | 0.519648 | -1.14639 |
| 0.152003093  | 0.73211  | -0.848   |
| -0.489384841 | 0.90449  | 0.18521  |
| -0.670582926 | 0.975994 | 0.04525  |
| 0.320089095  | 0.959603 | -0.0658  |
| -0.322853026 | 0.994913 | 0.00895  |
| -0.412600808 | 0.932506 | -0.14001 |
| -0.641802674 | 0.97215  | -0.04604 |
| 0.254390493  | 0.850552 | 0.26575  |
| -0.524420959 | 0.919738 | -0.12928 |
| -0.356800227 | 0.942518 | 0.11657  |
| -0.310678954 | 0.911409 | -0.18982 |
| -0.114407167 | 0.881902 | 0.19003  |
| -0.598418781 | 0.886779 | -0.2005  |
| -0.722042043 | 0.995841 | 0.00395  |
| -0.710506889 | 0.876034 | 0.17574  |
| -0.540497481 | 0.895597 | 0.13454  |
| -0.435768941 | 0.913365 | -0.14764 |
| -0.494905255 | 0.946877 | 0.05882  |
| -0.492968578 | 0.900187 | 0.12906  |
| -0.408146053 | 0.98421  | -0.02573 |
| -0.545315631 | 0.98878  | -0.02097 |
| -0.416872247 | 0.868074 | 0.12127  |
| -0.506806797 | 0.960653 | 0.07427  |
| -0.230226665 | 0.977779 | -0.0431  |
| -0.717875975 | 0.872346 | -0.25039 |
| -0.288183893 | 0.796178 | 0.2877   |

|              |          |          |
|--------------|----------|----------|
| -1.026044608 | 0.920621 | -0.04975 |
| -0.436526922 | 0.839769 | 0.17251  |
| -0.287332983 | 0.976286 | 0.04015  |
| -0.184968882 | 0.979015 | -0.03025 |
| -0.533277029 | 0.994504 | -0.00828 |
| -1.889817082 | 0.239289 | -0.6735  |
| -0.408360969 | 0.846933 | 0.20015  |
| -0.79031863  | 0.945075 | -0.07912 |
| -0.182203331 | 0.823549 | 0.24044  |
| -0.49437246  | 0.918593 | -0.14674 |
| -0.500816495 | 0.987565 | 0.01651  |
| -0.384890536 | 0.983119 | 0.02657  |
| -0.914481929 | 0.957031 | 0.08552  |
| -0.564582715 | 0.947773 | -0.08604 |
| -0.344396951 | 0.948085 | -0.10241 |
| -0.825081126 | 0.840245 | -0.22569 |
| -0.054774223 | 0.890462 | 0.17557  |
| -0.368243288 | 0.698639 | -0.64981 |
| -0.363744735 | 0.847879 | 0.20581  |
| -0.305089033 | 0.916215 | 0.07758  |
| -0.515473451 | 0.988761 | -0.01647 |
| -0.557725916 | 0.827194 | -0.3401  |
| -0.623552306 | 0.853182 | -0.26472 |
| -0.565486189 | 0.99191  | 0.01564  |
| -0.165238921 | 0.881649 | 0.16773  |
| -0.678071905 | 0.812953 | -0.41504 |
| -1.230910203 | 0.862911 | -0.2384  |
| -0.295466376 | 0.939902 | -0.08964 |
| -0.149513541 | 0.990911 | 0.01857  |
| #NUM!        | 0.198892 | 1.32193  |
| -0.415037499 | 0.80106  | 0.26303  |
| 0.42170123   | 0.963084 | -0.11103 |
| -0.810952546 | 0.912549 | 0.16915  |
| -0.051530301 | 0.902338 | 0.1828   |
| -0.641833877 | 0.867472 | 0.22136  |
| 0.185373232  | 0.918485 | 0.14129  |
| -0.369981712 | 0.902341 | 0.15046  |
| -0.507061162 | 0.92627  | -0.13093 |
| -0.544552629 | 0.935305 | -0.14263 |
| -0.130383051 | 0.948333 | -0.12709 |
| -0.329255328 | 0.950084 | -0.11236 |
| -0.925907266 | 0.95583  | -0.07875 |
| 0.306103128  | 0.993423 | 0.01738  |
| -0.486846444 | 0.926568 | -0.15107 |
| -1.264021817 | 0.937625 | -0.08797 |
| -0.798791201 | 0.940036 | 0.10867  |
| -1.464004348 | 0.890285 | 0.10097  |
| -0.366268186 | 0.909535 | 0.11142  |
| -0.474369801 | 0.923338 | -0.13509 |
| -0.634881664 | 0.990735 | -0.01558 |
| -0.058102955 | 0.891797 | 0.23857  |
| -0.36756838  | 0.972215 | 0.04385  |
| 1.26960706   | 0.978997 | -0.0813  |
| -0.325170751 | 0.98784  | 0.02231  |
| -0.387998079 | 0.962183 | 0.06182  |
| -0.176951312 | 0.885393 | 0.13284  |

|              |          |          |
|--------------|----------|----------|
| -0.078533403 | 0.962347 | 0.06714  |
| -1.268767519 | 0.911642 | 0.14381  |
| -1.790431619 | 0.783664 | -0.34805 |
| -1.347376172 | 0.91551  | -0.11574 |
| -0.550883255 | 0.981757 | -0.02989 |
| -4.459431619 | 0.115745 | -2.1375  |
| -0.74905095  | 0.954779 | 0.06416  |
| -0.388775495 | 0.955361 | 0.0884   |
| -0.798735274 | 0.790275 | -0.44995 |
| -0.611313828 | 0.83645  | -0.25036 |
| -1.983353334 | 0.686172 | -0.49832 |
| -2.332242312 | 0.945054 | -0.10316 |
| -0.784168864 | 0.943854 | -0.11683 |
| -0.444840081 | 0.941531 | -0.12237 |
| -1.923378718 | 0.538891 | -0.40632 |
| -1.170872132 | 0.68833  | -0.55959 |
| -0.881664619 | 0.766928 | -0.32095 |
| -0.491138738 | 0.938622 | 0.04289  |
| -0.506771452 | 0.990816 | -0.01457 |
| -0.301857155 | 0.974882 | -0.04001 |
| -0.183341391 | 0.961361 | -0.07987 |
| -0.645766812 | 0.907898 | -0.17758 |
| -0.573140792 | 0.9193   | 0.11323  |
| 1            | 0.428621 | 1.80735  |
| -0.455018097 | 0.930456 | 0.15057  |
| -1.149377624 | 0.886977 | 0.13894  |
| -2.321928095 | 0.604943 | -1       |
| -1.247641082 | 0.882379 | 0.2242   |
| -0.251346074 | 0.992959 | -0.01219 |
| -0.565802922 | 0.806554 | 0.438    |
| 0.628031223  | 0.725447 | -1.1375  |
| -0.768186579 | 0.72047  | -0.69137 |
| -1.850862274 | 0.598055 | -0.91406 |
| -1.874469118 | 0.778954 | -0.30968 |
| -1.509013647 | 0.825659 | 0.03847  |
| -0.917580356 | 0.759964 | 0.29964  |
| -1.688641147 | 0.553863 | -0.60618 |
| -1.492216991 | 0.743461 | -0.41046 |
| -1.052259308 | 0.840339 | -0.24125 |
| -0.700439718 | 0.742746 | -0.34289 |
| -0.103093493 | 0.777066 | -0.46566 |
| 0.26101806   | 0.753079 | 0.48341  |
| -0.939412224 | 0.799461 | -0.38792 |
| 0.791479753  | 0.969191 | 0.07564  |
| -0.360562153 | 0.928543 | -0.12882 |
| 2.103622631  | 0.559903 | 1.36427  |
| -0.625327378 | 0.892045 | -0.20033 |
| -0.259483883 | 0.95433  | -0.10282 |
| -0.536242525 | 0.952454 | -0.07192 |
| -0.404805808 | 0.974256 | 0.04539  |
| -0.608280638 | 0.901682 | -0.19955 |
| -0.39430488  | 0.976782 | 0.0252   |
| -0.847706216 | 0.557544 | -1.17233 |
| -0.243839896 | 0.987813 | 0.02011  |
| -1.480470025 | 0.578526 | 0.72713  |
| -0.763125614 | 0.943605 | -0.11091 |

|              |          |          |
|--------------|----------|----------|
| 0.123405625  | 0.887835 | 0.16819  |
| -0.508558573 | 0.858475 | -0.315   |
| -0.38081742  | 0.950747 | -0.09972 |
| -0.247875182 | 0.991917 | -0.01431 |
| -0.87143751  | 0.96744  | 0.04278  |
| -0.692341469 | 0.981953 | 0.03638  |
| -0.476796522 | 0.990388 | 0.01639  |
| -0.231819535 | 0.888042 | 0.15162  |
| -0.594256252 | 0.949556 | -0.07045 |
| -0.688937497 | 0.934046 | -0.11612 |
| -0.425650436 | 0.954789 | 0.06259  |
| -1.174228449 | 0.311374 | -2.13352 |
| -0.45161426  | 0.99597  | -0.00796 |
| -0.383325189 | 0.970331 | -0.05743 |
| -0.393556958 | 0.920053 | -0.16245 |
| -0.675896285 | 0.985147 | -0.01564 |
| -1.0096594   | 0.97176  | -0.03621 |
| -0.346775852 | 0.942729 | 0.09532  |
| -0.302232294 | 0.717687 | 0.33345  |
| -0.159478214 | 0.885505 | 0.20309  |
| -1           | 0.45177  | -2.32193 |
| -0.352206014 | 0.988922 | 0.01587  |
| 0.777607579  | 0.95615  | 0.11321  |
| 0.012031375  | 0.995585 | 0.00921  |
| -0.21896291  | 0.987081 | 0.02171  |
| -0.183149035 | 0.973281 | 0.05217  |
| -0.31388935  | 0.974907 | 0.04535  |
| -0.818469388 | 0.925529 | -0.0656  |
| -0.492706901 | 0.962803 | -0.07171 |
| -0.574023933 | 0.981514 | -0.03871 |
| -0.490364231 | 0.934625 | 0.07987  |
| -0.4175681   | 0.988832 | 0.01359  |
| 0.678071905  | 0.830364 | 0.48543  |
| #NUM!        | 0.308068 | #NUM!    |
| 0.201633861  | 0.701867 | 0.43296  |
| 0.144389909  | 1        | 0        |
| -0.522409858 | 0.975008 | -0.01421 |
| -0.45396036  | 0.930882 | -0.12007 |
| 0.32391274   | 0.956219 | 0.07599  |
| -0.547207579 | 0.990152 | -0.01649 |
| -0.842687995 | 0.978412 | -0.03363 |
| -0.353864307 | 0.744878 | 0.21422  |
| -0.328067535 | 0.948339 | -0.1234  |
| -0.491568436 | 0.960774 | -0.08837 |
| -0.289813737 | 0.966315 | -0.0679  |
| -0.857819989 | 0.945518 | 0.10912  |
| 0.061707207  | 0.998239 | -0.0032  |
| 0.080272942  | 0.946247 | 0.09501  |
| -0.554052665 | 0.970574 | -0.05635 |
| -0.359601793 | 0.988265 | 0.01792  |
| -0.220048481 | 0.795934 | 0.19704  |
| -0.565359157 | 0.986912 | 0.01751  |
| -0.735900481 | 0.936813 | -0.10037 |
| -0.168319656 | 0.973152 | -0.05111 |
| 0.105978558  | 0.760879 | 0.30453  |
| -0.340581328 | 0.906938 | -0.21261 |

|              |          |          |
|--------------|----------|----------|
| -0.501199516 | 0.919064 | -0.16468 |
| -1.005805622 | 0.945589 | -0.09582 |
| -0.688913465 | 0.672257 | -0.64    |
| 0.46166125   | 0.964987 | 0.07052  |
| 0.137862969  | 0.801894 | 0.24852  |
| 0.310340121  | 0.852059 | -0.47393 |
| 0.35614381   | 0.827015 | 0.48543  |
| -0.240597017 | 0.827094 | 0.19378  |
| -0.787490417 | 0.840945 | -0.29631 |
| -0.538517642 | 0.893525 | -0.20827 |
| -0.643608496 | 0.889438 | -0.19491 |
| -0.519062935 | 0.948741 | -0.10291 |
| -1.651457225 | 0.870372 | 0.23234  |
| -0.430460368 | 0.930663 | 0.1482   |
| -0.212209457 | 0.895179 | -0.22089 |
| -0.717520067 | 0.749868 | 0.20262  |
| 0.776841614  | 0.617114 | 0.60625  |
| -2           | 0.622002 | -0.41504 |
| -0.44976746  | 0.900757 | 0.16304  |
| -0.512615045 | 0.85038  | -0.30889 |
| -1.148807246 | 0.969513 | 0.06575  |
| 0.150559677  | 0.683882 | 0.42223  |
| -0.530661485 | 0.971533 | -0.05468 |
| 0.010155396  | 0.947241 | -0.1264  |
| -0.174382262 | 0.901144 | 0.13924  |
| -0.235635169 | 0.971856 | 0.0594   |
| -0.694110115 | 0.849458 | -0.29677 |
| -0.578267848 | 0.767231 | -0.37751 |
| -0.120986957 | 0.9958   | 0.00907  |
| -0.154207997 | 0.825288 | 0.39703  |
| -0.487609519 | 0.966429 | -0.05026 |
| -0.036302301 | 0.964582 | 0.07826  |
| -0.266146018 | 0.993002 | -0.01629 |
| -0.320704377 | 0.929885 | -0.1507  |
| -0.641670465 | 0.903013 | 0.09111  |
| -0.694167208 | 0.978787 | 0.03415  |
| -0.477655635 | 0.960788 | -0.07622 |
| -0.676510667 | 0.910029 | -0.11936 |
| -0.52872536  | 0.975595 | -0.03648 |
| -0.683217104 | 0.833502 | -0.19894 |
| -0.415037499 | 0.604181 | -1       |
| -0.163157306 | 0.968038 | -0.06421 |
| -0.444450227 | 0.996079 | -0.00755 |
| -0.00039071  | 0.991271 | 0.01863  |
| -0.363728405 | 0.958547 | -0.08127 |
| -0.08703718  | 0.773896 | -0.50933 |
| -0.95152749  | 0.715488 | -0.57429 |
| -0.430272466 | 0.996978 | 0.00511  |
| -0.594318999 | 0.841607 | -0.30127 |
| -0.074970758 | 0.899326 | 0.20702  |
| -0.06124413  | 0.959515 | -0.10056 |
| -2.700439718 | 0.468138 | -1.70044 |
| -0.465882517 | 0.826644 | -0.21582 |
| 1.584962501  | 0.183649 | 2.45943  |
| -0.585703294 | 0.981503 | 0.02351  |
| -0.784327993 | 0.846094 | 0.16288  |

|              |          |          |
|--------------|----------|----------|
| -0.237039197 | 0.878348 | 0.1784   |
| -0.080449832 | 0.784288 | 0.33265  |
| -1.287007251 | 0.838047 | -0.32041 |
| -1.140473561 | 0.964653 | -0.06553 |
| -1.210344794 | 0.872285 | -0.24602 |
| -0.520791298 | 0.971446 | -0.03123 |
| -0.351810697 | 0.968028 | -0.04394 |
| 2.960912644  | 0.380467 | 1.84699  |
| #NUM!        | 0.308068 | #NUM!    |
| -0.914270126 | 0.919275 | -0.15528 |
| 1.568842835  | 0.616727 | 1.04731  |
| -0.638351958 | 0.882024 | -0.25596 |
| -0.695695551 | 0.899266 | 0.14468  |
| -0.584962501 | 0.756486 | -0.58496 |
| -0.971087308 | 0.823093 | 0.28045  |
| -1.833990049 | 0.415857 | -1.31316 |
| -0.571541985 | 0.6168   | 0.44836  |
| -1.99208093  | 0.734558 | -0.3517  |
| -0.860596943 | 0.743609 | 0.47644  |
| #DIV/0!      | ?        | #DIV/0!  |
| -0.584962501 | 0.635978 | 1        |
| -1.309844027 | 0.666994 | -0.44648 |
| -2.772589504 | 0.408584 | -1.16491 |
| -2.26589406  | 0.523292 | -0.95777 |
| -1.810966176 | 0.769246 | 0.47508  |
| -1.921997488 | 0.830187 | -0.35401 |
| -1.065376009 | 0.857269 | 0.26418  |
| 1.614709844  | 0.702332 | 1.04439  |
| -0.572639222 | 0.974672 | -0.05159 |
| -1.140321288 | 0.966675 | -0.06477 |
| -2           | 0.543301 | -1       |
| -0.162650338 | 0.970997 | 0.05209  |
| -0.386295114 | 0.953749 | 0.07561  |
| 0.055906683  | 0.993945 | 0.01261  |
| -0.496931302 | 0.984288 | 0.02735  |
| -0.337034987 | 0.927898 | 0.11548  |
| -0.356666936 | 0.930294 | -0.09689 |
| 0.0449269    | 0.921837 | 0.17273  |
| -4.169925001 | 0.34614  | -1.36257 |
| -0.3271121   | 0.954065 | -0.08323 |
| -0.46691527  | 0.965548 | 0.04931  |
| -0.913585248 | 0.837046 | -0.30643 |
| -0.217554144 | 0.829059 | 0.20741  |
| -0.883265806 | 0.997637 | 0.00344  |
| -0.389606284 | 0.892071 | 0.21135  |
| -0.256229347 | 0.924027 | 0.12744  |
| -1.430239906 | 0.813751 | -0.35869 |
| 0.058779412  | 0.868117 | -0.13152 |
| 0.179388981  | 0.764336 | 0.4498   |
| -0.437963896 | 0.922223 | -0.16029 |
| -1.335603032 | 0.971338 | -0.02748 |
| -1.073543236 | 0.752793 | -0.56608 |
| -0.158287645 | 0.93743  | 0.11195  |
| -0.306826655 | 0.997536 | 0.0047   |
| -0.49927551  | 0.923233 | 0.12007  |
| 0.836864164  | 0.640961 | 0.85704  |

|              |          |          |
|--------------|----------|----------|
| -0.038590662 | 0.840253 | 0.3248   |
| 0.595724113  | 0.874979 | 0.26778  |
| 0.831877241  | 0.884481 | 0.23879  |
| -1.346973224 | 0.936527 | 0.12029  |
| -0.292143943 | 0.937945 | 0.1064   |
| -0.779462849 | 0.90091  | -0.17943 |
| -0.120193956 | 0.906352 | -0.2248  |
| -0.423324476 | 0.898949 | -0.2215  |
| -0.257275137 | 0.403562 | 0.69599  |
| -0.562072785 | 0.9689   | -0.05111 |
| -0.406541732 | 0.994971 | 0.00339  |
| -0.325144368 | 0.981742 | -0.04244 |
| -0.633338095 | 0.982152 | 0.02921  |
| -0.088963726 | 0.915404 | 0.18655  |
| -1.452757165 | 0.993503 | -0.01286 |
| -0.946228744 | 0.829373 | 0.30724  |
| -0.071608335 | 0.985705 | -0.03619 |
| -0.463495451 | 0.959879 | -0.08504 |
| -1.062931256 | 0.767354 | -0.43274 |
| -0.674489348 | 0.902574 | -0.15992 |
| -0.354631611 | 0.926998 | 0.09613  |
| -0.259202043 | 0.90225  | 0.13338  |
| -0.181008501 | 0.963621 | -0.0661  |
| -0.236745674 | 0.999472 | -0.00103 |
| -0.384143491 | 0.881106 | -0.1854  |
| -0.060606765 | 0.962618 | -0.07657 |
| -2.110590862 | 0.851436 | 0.1498   |
| -0.462947165 | 0.953721 | -0.08257 |
| 0.459431619  | 0.96452  | 0.07039  |
| -0.777464561 | 0.52633  | -0.57201 |
| 0.034542654  | 0.994542 | -0.01286 |
| -0.403883221 | 0.958343 | -0.07036 |
| 0.251538767  | 0.71302  | 0.46566  |
| -0.321928095 | 0.567924 | -1.32193 |
| -0.380509816 | 0.974043 | -0.04564 |
| -0.802738294 | 0.888525 | -0.06946 |
| -0.210756453 | 0.97588  | 0.04385  |
| -0.452444701 | 0.918524 | -0.14121 |
| -0.700439718 | 0.470688 | 1        |
| -0.529059507 | 0.953848 | 0.05653  |
| -0.839064588 | 0.911334 | -0.07076 |
| -0.286989703 | 0.926076 | -0.12605 |
| 0.049468676  | 0.409492 | 0.6612   |
| -0.235081247 | 0.948528 | -0.09863 |
| -0.490399161 | 0.816086 | 0.20898  |
| -1.052723187 | 0.792266 | -0.23853 |
| -0.572993241 | 0.933315 | -0.13636 |
| -0.635247326 | 0.981752 | 0.03133  |
| -0.437666787 | 0.989834 | -0.01493 |
| -0.261289607 | 0.96589  | -0.07008 |
| -0.442203252 | 0.76244  | 0.247    |
| -0.427910581 | 0.931106 | -0.10045 |
| -0.38782578  | 0.995235 | 0.00625  |
| -0.884092467 | 0.421002 | -0.23376 |
| -0.602798588 | 0.933397 | 0.10774  |
| -0.680864465 | 0.989401 | 0.01263  |

|              |          |          |
|--------------|----------|----------|
| 0.690265328  | 0.925445 | 0.16159  |
| -0.247408103 | 0.978227 | 0.03697  |
| -0.563405744 | 0.779199 | 0.42571  |
| 0.147473664  | 0.926077 | 0.14747  |
| -0.464935213 | 0.901656 | -0.19212 |
| -0.201434174 | 0.947305 | 0.08798  |
| -0.725874448 | 0.948343 | -0.09834 |
| -0.700439718 | 0.746157 | 0.55758  |
| -0.359804374 | 0.935333 | -0.13131 |
| -0.61907278  | 0.863671 | 0.23393  |
| -0.897417854 | 0.81286  | -0.39673 |
| -0.865742947 | 0.978611 | -0.03714 |
| -1.217805152 | 0.953453 | -0.07062 |
| -1.342154107 | 0.763403 | 0.39317  |
| -0.344969169 | 0.973439 | 0.05266  |
| -0.175428866 | 0.938536 | 0.11512  |
| -0.254376973 | 0.939597 | 0.11099  |
| -0.196236279 | 0.928222 | 0.15721  |
| -0.777607579 | 0.796417 | 0.32193  |
| -0.40327405  | 0.932676 | -0.1408  |
| 0.069262662  | 0.974675 | -0.05627 |
| -0.074962058 | 0.934116 | -0.13887 |
| -0.47031018  | 0.986844 | -0.02082 |
| -0.19736553  | 0.885576 | 0.20939  |
| -0.745009024 | 0.420096 | 1.04998  |
| -0.404564168 | 0.830242 | 0.26484  |
| -0.360896734 | 0.912788 | 0.14398  |
| -0.260133311 | 0.927591 | 0.14172  |
| -0.466220158 | 0.94554  | 0.08859  |
| #DIV/0!      | 0.450185 | #DIV/0!  |
| -0.628342048 | 0.974358 | -0.05576 |
| -0.270293389 | 0.929055 | 0.11803  |
| -0.567556261 | 0.887082 | 0.1437   |
| -0.426676466 | 0.986546 | 0.02404  |
| -0.072983758 | 0.997188 | 0.00645  |
| -0.482434717 | 0.9634   | -0.0679  |
| -0.416985771 | 0.949735 | 0.08889  |
| #DIV/0!      | 0.308068 | #DIV/0!  |
| #NUM!        | 1        | 0        |
| -0.418395654 | 0.897878 | 0.14123  |
| -0.506570415 | 0.969    | -0.05639 |
| 0.736965594  | 0.706667 | -1.58496 |
| -0.471896488 | 0.943264 | 0.08413  |
| -0.302796235 | 0.983264 | -0.03379 |
| -0.337212393 | 0.995305 | -0.00794 |
| -0.579277984 | 0.917572 | -0.10635 |
| -0.132247798 | 0.950509 | 0.10654  |
| -0.289506617 | 0.978033 | 0.0438   |
| -0.319560411 | 0.803079 | 0.21743  |
| -0.173168229 | 0.947369 | -0.08806 |
| -0.104281385 | 0.921286 | 0.17764  |
| -0.47720632  | 0.939447 | -0.12103 |
| -0.741481819 | 0.979101 | -0.02574 |
| -0.258311996 | 0.994643 | -0.00677 |
| -0.246530886 | 0.971174 | -0.05103 |
| -0.750021747 | 0.944887 | 0.05197  |



|              |          |          |
|--------------|----------|----------|
| -0.09983857  | 0.977559 | 0.04385  |
| -0.502595669 | 0.862058 | 0.15495  |
| -0.794309036 | 0.876108 | -0.24537 |
| -0.635473848 | 0.895881 | 0.09387  |
| -0.518400113 | 0.992045 | 0.01683  |
| -0.340893001 | 0.926428 | -0.1737  |
| -0.836501268 | 0.543587 | -0.8365  |
| -0.914608509 | 0.944253 | 0.11005  |
| -0.322822723 | 0.941705 | -0.12406 |
| -0.419197694 | 0.93416  | -0.13816 |
| -0.531342662 | 0.887499 | 0.15857  |
| -0.522809692 | 0.629949 | 0.15261  |
| 0.223407332  | 0.730092 | -0.42693 |
| -0.26986458  | 0.787236 | -0.48484 |
| -0.464699427 | 0.787299 | -0.47693 |
| -0.195664322 | 0.911487 | -0.22005 |
| 0.391062794  | 0.548348 | 1.15822  |
| 1.663839683  | 0.474999 | 1.73778  |
| 0            | 1        | 0        |
| #DIV/0!      | ?        | #DIV/0!  |
| -0.353982119 | 0.900864 | -0.20291 |
| -0.278206717 | 0.820059 | 0.30316  |
| -0.566362475 | 0.952475 | -0.06514 |
| -0.754797    | 0.849173 | -0.12504 |
| -0.736357375 | 0.583063 | -0.23538 |
| -0.446064395 | 0.910015 | 0.09071  |
| -0.349626757 | 0.913091 | -0.17782 |
| -0.442004547 | 0.900928 | -0.19265 |
| -0.322397188 | 0.994722 | 0.00935  |
| -0.767783488 | 0.935874 | 0.05442  |
| 0.253756592  | 0.989087 | 0.02748  |
| -0.479001256 | 0.908096 | -0.1401  |
| -0.364555895 | 0.958245 | -0.06979 |
| -0.215012891 | 0.966911 | -0.06485 |
| -0.35050039  | 0.996785 | 0.00627  |
| -1.282933963 | 0.833337 | -0.25909 |
| -0.522791945 | 0.936662 | -0.07904 |
| -0.263655442 | 0.689499 | 0.24139  |
| -0.033285402 | 0.625864 | 0.43335  |
| -0.561096963 | 0.706623 | 0.18282  |
| -0.407332628 | 0.75416  | 0.17106  |
| -0.421238641 | 0.655628 | 0.27284  |
| -0.210757016 | 0.798489 | 0.16974  |
| -0.385279672 | 0.90644  | -0.06788 |
| -0.446183649 | 0.727343 | 0.24674  |
| -0.181282937 | 0.632672 | 0.3026   |
| -0.267010337 | 0.542461 | 0.27884  |
| -0.418820349 | 0.917403 | 0.10281  |
| -0.32162936  | 0.365612 | 0.35774  |
| -0.296315248 | 0.662427 | 0.28428  |
| -0.244188971 | 0.692128 | 0.34023  |
| -0.232461934 | 0.809921 | 0.15143  |
| -0.685440257 | 0.81059  | -0.07033 |
| -0.460998095 | 0.951027 | 0.04366  |
| 0.214460431  | 0.393471 | 0.73678  |
| -0.259858587 | 0.812174 | 0.17582  |

|              |          |          |
|--------------|----------|----------|
| -0.16645067  | 0.380826 | 0.41817  |
| -0.364938036 | 0.523893 | 0.2557   |
| -0.493658098 | 0.944253 | -0.0266  |
| -0.12234981  | 0.694599 | 0.28165  |
| -0.130520648 | 0.645475 | 0.25041  |
| 0.150012175  | 0.28593  | 0.77061  |
| -0.091116756 | 0.277727 | 0.75887  |
| -0.090991575 | 0.867004 | 0.18835  |
| 1.92358E-05  | 0.829527 | -0.41503 |
| -0.408889774 | 0.978943 | 0.02449  |
| 0.028664023  | 0.695351 | 0.29583  |
| -0.268351082 | 0.74634  | 0.21515  |
| -0.191053159 | 0.886938 | 0.14348  |
| -0.394627622 | 0.947392 | 0.05135  |
| -0.340640355 | 0.862273 | 0.16518  |
| -0.321265492 | 0.894356 | 0.09545  |
| -0.164452718 | 0.824572 | 0.19206  |
| -0.699312238 | 0.814297 | -0.11501 |
| -0.379164738 | 0.494534 | 0.25792  |
| -0.311210932 | 0.661802 | 0.2631   |
| -0.224488464 | 0.991311 | -0.01501 |
| -0.527904258 | 0.954062 | -0.07652 |
| -0.173536255 | 0.869887 | 0.15776  |
| -1.552541023 | 0.603116 | -0.75899 |
| -0.535778023 | 0.96873  | -0.04694 |
| -0.280720529 | 0.931678 | -0.10675 |
| -0.490066161 | 0.944769 | -0.07551 |
| -0.422285524 | 0.969113 | -0.06304 |
| -0.270123502 | 0.995358 | 0.00682  |
| -1.003155393 | 0.282929 | -0.90609 |
| -0.293825074 | 0.467777 | 0.34469  |
| -0.065460969 | 0.480749 | 0.39684  |
| -0.222173093 | 0.529946 | 0.4004   |
| -0.17008241  | 0.753592 | 0.21172  |
| -0.419535451 | 0.999821 | -0.00012 |
| 0.139201654  | 0.689795 | 0.35578  |
| 0.147848555  | 0.52541  | 0.47403  |
| -0.174662334 | 0.480907 | 0.35522  |
| -0.546339684 | 0.879519 | -0.09982 |
| -0.657062551 | 0.998249 | -0.00119 |
| -0.159264242 | 0.655091 | 0.34059  |
| -0.256203913 | 0.77806  | 0.19436  |
| 0.05143519   | 0.638739 | 0.38148  |
| -0.057750668 | 0.467757 | 0.46596  |
| -0.658810568 | 0.979848 | 0.01029  |
| -0.782368919 | 0.644721 | -0.21174 |
| -0.344064968 | 0.706768 | 0.1331   |
| -0.441426868 | 0.835724 | 0.10731  |
| -0.278773561 | 0.634945 | 0.30658  |
| -0.448723285 | 0.97915  | 0.01513  |
| -0.151090355 | 0.445658 | 0.41196  |
| -1.361894502 | 0.995685 | -0.00791 |
| -0.714258443 | 0.916178 | -0.17199 |
| -0.436639754 | 0.953141 | -0.09618 |
| -0.336804211 | 0.960974 | -0.08931 |
| -0.347607811 | 0.973962 | -0.05003 |

|              |           |          |
|--------------|-----------|----------|
| -0.293468027 | 0.859741  | 0.18166  |
| -0.503772411 | 0.896785  | 0.1929   |
| -0.648140567 | 0.824644  | 0.28636  |
| 0.006027248  | 0.740496  | 0.33406  |
| -0.324878885 | 0.832961  | 0.14523  |
| -0.48773132  | 0.991418  | 0.00801  |
| -0.596995056 | 0.942886  | -0.1171  |
| -0.496678054 | 0.98386   | -0.02618 |
| -0.451396656 | 0.944947  | 0.07277  |
| -0.411693462 | 0.985388  | 0.02323  |
| -1.184424571 | 0.697087  | -0.39593 |
| -0.086784723 | 0.884857  | 0.1886   |
| -0.522354747 | 0.947551  | -0.10509 |
| -0.62883731  | 0.819241  | -0.37353 |
| 0.518028845  | 0.680412  | 0.57895  |
| -0.132337801 | 0.945762  | 0.10374  |
| 0.173355942  | 0.985549  | 0.0371   |
| -1.222392421 | 0.896328  | -0.14439 |
| -0.390577039 | 0.945025  | -0.08919 |
| -0.697929724 | 0.907111  | -0.12674 |
| -0.140526986 | 0.975779  | -0.05019 |
| -0.555742362 | 0.938698  | -0.11118 |
| -0.650823087 | 0.938737  | -0.0628  |
| -0.454374932 | 0.944557  | -0.08659 |
| -0.191237342 | 0.588861  | 0.50617  |
| -0.486978173 | 0.881874  | -0.24396 |
| -0.621568391 | 0.929384  | 0.06856  |
| -0.371738811 | 0.916832  | 0.10353  |
| -2.087462841 | 0.456318  | -0.76553 |
| 1            | 1         | 0        |
| -0.137773548 | 0.951909  | 0.08984  |
| -0.280239282 | 0.98925   | 0.02281  |
| -1.310612798 | 0.330177  | -0.6164  |
| -2.553927736 | 0.0584617 | -1.59282 |
| -0.20166383  | 0.98796   | 0.02201  |
| -0.255957755 | 0.741778  | 0.32178  |
| -0.367731785 | 0.845914  | -0.23447 |
| -0.126474745 | 0.970396  | 0.05098  |
| 0.553935605  | 0.978449  | 0.04532  |
| 0.575802501  | 0.887633  | 0.19607  |
| -2.216811389 | 0.576321  | -0.98332 |
| 0.247927513  | 0.817588  | 0.3373   |
| 0.784473644  | 0.953538  | -0.10546 |
| -0.807354922 | 0.69089   | -0.48543 |
| -0.215693568 | 0.982549  | -0.03583 |
| -0.330016915 | 0.883637  | 0.15913  |
| -0.250749331 | 0.852054  | 0.2292   |
| -0.373849453 | 0.964232  | 0.04834  |
| 0.120294234  | 0.893236  | -0.20163 |
| -0.316528107 | 0.93411   | 0.09491  |
| 0.269720538  | 0.893627  | 0.20462  |
| -0.28776334  | 0.917711  | -0.17761 |
| -0.520063159 | 0.963752  | -0.07113 |
| -0.498393246 | 0.934386  | -0.14359 |
| -1.2531425   | 0.649358  | 0.37531  |
| -0.964840569 | 0.94556   | -0.08771 |

|              |          |          |
|--------------|----------|----------|
| -0.374685766 | 0.841664 | 0.22897  |
| 0.388333175  | 0.995706 | -0.01118 |
| -0.678071905 | 0.753462 | -0.67807 |
| -1.550515009 | 0.963877 | 0.03517  |
| -0.524191175 | 0.874874 | -0.28671 |
| -0.19306042  | 0.925373 | 0.12714  |
| -0.763713893 | 0.965143 | 0.05684  |
| -1.071872311 | 0.863752 | 0.22239  |
| -0.572701986 | 0.952078 | 0.06861  |
| -0.831569909 | 0.968965 | 0.05466  |
| -1.327325721 | 0.727788 | 0.61479  |
| -1.979778183 | 0.748489 | -0.54268 |
| 1.519374159  | 0.853977 | 0.55254  |
| -1.03562391  | 0.529157 | -1.10962 |
| -0.681254556 | 0.875397 | 0.19534  |
| -1.582174299 | 0.775304 | 0.42971  |
| -0.46323707  | 0.970265 | 0.0368   |
| -0.317999476 | 0.99163  | 0.01211  |
| -0.613390909 | 0.928734 | -0.12106 |
| -0.310505568 | 0.985786 | 0.01867  |
| -0.221356375 | 0.948569 | -0.10309 |
| -0.419604661 | 0.948784 | 0.06984  |
| -1.508611615 | 0.681037 | -0.70765 |
| -0.7589919   | 1        | 0        |
| -0.62935662  | 0.80644  | -0.47961 |
| -1.650341654 | 0.768756 | -0.24801 |
| -0.371410567 | 0.974669 | 0.04975  |
| -0.090514818 | 0.997955 | 0.00386  |
| -1.196223488 | 0.904699 | 0.20381  |
| -0.289508907 | 0.908917 | -0.23337 |
| 0.718016056  | 0.298797 | 0.81469  |
| 0.129592907  | 0.44936  | 0.44854  |
| 0.21344057   | 0.220056 | 0.51845  |
| -0.196397213 | 0.6414   | 0.57619  |
| #DIV/0!      | ?        | #DIV/0!  |
| -0.893691098 | 0.916379 | -0.17099 |
| -0.830074999 | 0.829606 | 0.16993  |
| -0.260664799 | 0.880054 | -0.23408 |
| -0.500265336 | 0.949206 | -0.09714 |
| -1.3713243   | 0.817605 | -0.40177 |
| -0.748461233 | 0.967824 | -0.07039 |
| 0.47841799   | 0.909737 | 0.2247   |
| -0.555947207 | 0.891409 | -0.24951 |
| 0.247400217  | 0.915552 | 0.18771  |
| -1.341036918 | 0.905181 | 0.12711  |
| -0.378728551 | 0.627152 | 0.72005  |
| -0.283792966 | 0.896176 | -0.24257 |
| -0.093109404 | 0.992587 | 0.01417  |
| 0.199937571  | 0.928854 | 0.1304   |
| -4.392317423 | 0.33862  | -3.80735 |
| -0.735425898 | 0.900411 | -0.19562 |
| -2.662965013 | 0.755787 | 0.50696  |
| 1.321928095  | 0.692112 | 1.16993  |
| -0.878116895 | 0.85878  | -0.26303 |
| -0.412012692 | 0.950907 | -0.09294 |
| -0.623034162 | 0.953042 | 0.06681  |

|              |          |          |
|--------------|----------|----------|
| -1.078002512 | 0.428621 | -1.078   |
| -0.403007008 | 0.97097  | 0.05261  |
| -0.502703043 | 0.529167 | 0.22243  |
| -0.26028579  | 0.88852  | 0.15862  |
| -0.550843682 | 0.920188 | 0.08778  |
| -0.383949533 | 0.929951 | -0.13572 |
| -0.493589723 | 0.978099 | -0.02243 |
| -0.482558326 | 0.990633 | -0.01329 |
| -0.260069158 | 0.987082 | 0.02083  |
| -0.930660796 | 0.746207 | 0.45965  |
| -0.336629637 | 0.929008 | 0.10394  |
| -0.560410621 | 0.949297 | -0.08599 |
| -0.565971068 | 0.887391 | -0.25541 |
| -1.064130337 | 0.876848 | 0.17688  |
| -0.423394721 | 0.97684  | -0.03841 |
| -0.164914691 | 0.749673 | 0.27399  |
| 0.163611228  | 0.894072 | 0.21879  |
| 0            | 0.976152 | 0.04947  |
| -0.403478875 | 0.997526 | -0.00382 |
| -0.628489876 | 0.981586 | -0.01828 |
| -0.33457407  | 0.986274 | -0.02201 |
| -0.449564099 | 0.98854  | 0.02289  |
| -0.537454924 | 0.899652 | -0.23076 |
| -1.195835323 | 0.925502 | 0.11464  |
| -1           | 0.651448 | -1       |
| -0.375541797 | 0.978898 | -0.04119 |
| 0.080150979  | 0.962423 | 0.08894  |
| -0.816237827 | 0.95023  | -0.07062 |
| -0.37515549  | 0.918875 | -0.17622 |
| -0.512781843 | 0.988484 | 0.02162  |
| -0.430166192 | 0.907547 | -0.20244 |
| -0.500353536 | 0.877858 | -0.27152 |
| -0.259298062 | 0.93161  | 0.11079  |
| -0.418305603 | 0.988184 | -0.01815 |
| -0.565718735 | 0.949689 | -0.0877  |
| -0.723345985 | 0.930867 | 0.09756  |
| -0.643000472 | 0.970403 | 0.05549  |
| 0.545922393  | 0.673749 | 0.69582  |
| -2.661504056 | 0.177843 | -1.27448 |
| -1.116586556 | 0.971962 | -0.04048 |
| -0.33171508  | 0.990302 | 0.01526  |
| -1.156119202 | 0.906057 | -0.1727  |
| -0.638808095 | 0.801282 | -0.38853 |
| #DIV/0!      | 0.450185 | #DIV/0!  |
| -1.485426827 | 0.940721 | -0.10692 |
| 0.218640286  | 0.699097 | 0.61096  |
| -2.584962501 | 0.844063 | 0.22239  |
| -1.137503524 | 0.897841 | -0.1375  |
| 0.678071905  | 0.395265 | 1.37851  |
| -1.584962501 | 0.724378 | -0.58496 |
| -0.125530882 | 0.9402   | -0.12553 |
| #DIV/0!      | ?        | #DIV/0!  |
| -1.321928095 | 0.338084 | #NUM!    |
| #DIV/0!      | 0.31594  | #DIV/0!  |
| -0.065588342 | 0.921662 | -0.20645 |
| -0.469485283 | 0.88377  | -0.26303 |

|              |          |          |
|--------------|----------|----------|
| -0.551984072 | 0.97513  | -0.04025 |
| -1.481262032 | 0.94483  | -0.10223 |
| -0.539927624 | 0.96474  | 0.05097  |
| -0.242498673 | 0.959174 | -0.07124 |
| -0.938167989 | 0.804912 | 0.34311  |
| -1.775134138 | 0.965631 | 0.05601  |
| -1.116856373 | 0.634917 | 0.34514  |
| #DIV/0!      | ?        | #DIV/0!  |
| -2.748938236 | 0.815236 | 0.26105  |
| -1.196122388 | 0.931378 | -0.07603 |
| -0.491514361 | 0.752619 | -0.44941 |
| 0.026863168  | 0.98733  | 0.02744  |
| -0.489597599 | 0.968693 | -0.03958 |
| -0.740687669 | 0.908411 | 0.14718  |
| 0.182653306  | 0.952215 | 0.10083  |
| -0.343954401 | 0.887019 | 0.24101  |
| -1.076791392 | 0.903557 | 0.21022  |
| -1.123995102 | 0.899605 | 0.20898  |
| 0.085575732  | 0.919726 | 0.152    |
| -1.419782542 | 0.853009 | 0.27496  |
| -0.256955238 | 0.861069 | -0.26193 |
| -1.756276273 | 0.610808 | -0.96621 |
| -0.795579573 | 0.956484 | 0.09925  |
| 0.645701222  | 0.748257 | 0.56331  |
| 0.223203608  | 0.913167 | 0.16967  |
| -1           | 0.651448 | -1       |
| -0.480166311 | 0.870954 | -0.24185 |
| -0.511875482 | 0.981857 | 0.02392  |
| -0.447458977 | 0.854429 | 0.10466  |
| -0.170958821 | 0.98178  | 0.03673  |
| -0.327574658 | 0.937945 | -0.10739 |
| -1.169925001 | 0.973985 | -0.05445 |
| -0.298545349 | 0.95654  | -0.08541 |
| -0.410373937 | 0.940792 | 0.09905  |
| -0.33493076  | 0.984609 | 0.01987  |
| -0.420167102 | 0.79562  | 0.26568  |
| #DIV/0!      | ?        | #DIV/0!  |
| -1           | 0.499897 | 1.58496  |
| -0.402739748 | 0.824673 | -0.42718 |
| -0.1653836   | 0.89961  | 0.20702  |
| -0.015664595 | 0.929139 | -0.15616 |
| -0.491501754 | 0.92542  | -0.15739 |
| -0.456901345 | 0.99548  | -0.00846 |
| -0.528322726 | 0.993154 | 0.00947  |
| -0.100293591 | 0.990839 | 0.01827  |
| -0.5259679   | 0.941082 | 0.09446  |
| -0.562473993 | 0.99432  | -0.01108 |
| 0.758198011  | 0.781712 | 0.46596  |
| -0.24122587  | 0.981374 | 0.02775  |
| -0.611999257 | 0.969319 | 0.02926  |
| -0.3016557   | 0.968392 | -0.0555  |
| -0.80948341  | 0.959713 | 0.01615  |
| -0.290762083 | 0.955041 | 0.06338  |
| -0.075243424 | 0.985099 | -0.02708 |
| -0.589490231 | 0.967723 | 0.04162  |
| -0.587050036 | 0.885411 | 0.12105  |

|              |          |          |
|--------------|----------|----------|
| -0.877487309 | 0.626551 | -0.18007 |
| -1.046872733 | 0.781348 | -0.50781 |
| -0.031003853 | 0.975124 | 0.05636  |
| 0.025872525  | 0.900485 | 0.17693  |
| -0.198711079 | 0.985739 | -0.02853 |
| -1.538419915 | 0.741236 | -0.53842 |
| -0.321928095 | 0.888898 | 0.1375   |
| -0.310974657 | 0.59436  | 0.29948  |
| -0.495456182 | 0.699523 | 0.37147  |
| -0.373464258 | 0.822799 | 0.16371  |
| -1.145010337 | 0.859606 | -0.27319 |
| -0.012675315 | 0.804453 | 0.23603  |
| -1.637063149 | 0.931293 | 0.1369   |
| -0.30701011  | 0.917235 | -0.18862 |
| 0.238159737  | 0.88222  | 0.28445  |
| -0.42571588  | 0.96573  | -0.05366 |
| -1.075811136 | 0.696588 | -0.31418 |
| -0.215581889 | 0.984908 | 0.03003  |
| -0.425363668 | 0.980613 | -0.03276 |
| -0.307621784 | 0.953676 | 0.06721  |
| -0.452725811 | 0.95841  | -0.07889 |
| -0.439208917 | 0.948859 | -0.10236 |
| -0.395892186 | 0.967362 | -0.06579 |
| -0.341095961 | 0.94564  | -0.10681 |
| -0.598882129 | 0.753473 | -0.52237 |
| -0.612631473 | 0.943317 | -0.09931 |
| -0.440626729 | 0.965524 | -0.06571 |
| -0.421947684 | 0.925749 | -0.1375  |
| -0.865610744 | 0.606233 | -0.2031  |
| -0.432394338 | 0.84138  | 0.20486  |
| -0.205034474 | 0.987053 | 0.01745  |
| -0.401305765 | 0.911966 | -0.16022 |
| -0.220789346 | 0.952065 | -0.10147 |
| -0.536892495 | 0.906382 | -0.21353 |
| -0.802596166 | 0.946574 | -0.07357 |
| -0.319151932 | 0.951311 | -0.09915 |
| -0.336135444 | 0.982744 | -0.03595 |
| -2.64385619  | 0.693594 | -0.64386 |
| -0.69743723  | 0.718738 | -0.35358 |
| -0.156172735 | 0.583773 | 0.41164  |
| -0.447066353 | 0.903108 | 0.18994  |
| -0.830074999 | 0.803195 | -0.47644 |
| -0.490761329 | 0.919689 | 0.06672  |
| -0.256106972 | 0.741715 | 0.32488  |
| -0.391015155 | 0.983234 | 0.0207   |
| -0.13378181  | 0.984784 | 0.03484  |
| -0.858424555 | 0.979089 | -0.03657 |
| -0.319945218 | 0.923355 | -0.14166 |
| -0.722466024 | 0.710232 | -0.54189 |
| -0.656990645 | 0.839212 | -0.2624  |
| -0.683287629 | 0.92144  | 0.12367  |
| -0.394064071 | 0.836873 | -0.31644 |
| -0.221319498 | 0.837129 | -0.40861 |
| -0.319908479 | 0.986351 | -0.03021 |
| -1.208955513 | 0.852533 | -0.30616 |
| -0.990776639 | 0.830838 | -0.29447 |

|              |          |          |
|--------------|----------|----------|
| -0.935537818 | 0.784681 | -0.48349 |
| -0.98917297  | 0.860581 | -0.26521 |
| -0.44107536  | 0.960467 | -0.07379 |
| -0.396586558 | 0.952203 | -0.08902 |
| -0.523561956 | 0.925409 | -0.14284 |
| -0.313778063 | 0.883517 | -0.25966 |
| -0.450712373 | 0.949098 | -0.11683 |
| -0.481415795 | 0.783726 | 0.41219  |
| -0.181946887 | 0.889494 | 0.13868  |
| -0.643757988 | 0.85471  | -0.21843 |
| -0.251572671 | 0.935215 | -0.14675 |
| 0.462779175  | 0.747775 | 0.4497   |
| -0.504019656 | 0.945061 | -0.10489 |
| -0.128873219 | 0.976066 | 0.04137  |
| -0.645572454 | 0.844457 | -0.27446 |
| 0.247285485  | 0.789037 | 0.38495  |
| -0.516325568 | 0.966357 | 0.04759  |
| -1.550980401 | 0.781047 | 0.33038  |
| -0.641588446 | 0.959294 | -0.05828 |
| -0.443830916 | 0.979495 | -0.03635 |
| -0.743683526 | 0.813822 | -0.33616 |
| -0.96152035  | 0.72352  | -0.4502  |
| -0.676385528 | 0.826232 | 0.16818  |
| -0.20029865  | 0.925039 | -0.17327 |
| -0.321662163 | 0.885325 | 0.14938  |
| -0.306264127 | 0.579951 | 0.34557  |
| -0.651051691 | 0.957674 | 0.02098  |
| -0.458522643 | 0.933565 | 0.10743  |
| -0.039390578 | 0.878957 | 0.19605  |
| -0.697873565 | 0.772977 | 0.33015  |
| -0.12749813  | 0.975708 | 0.03961  |
| -0.886004811 | 0.965367 | 0.04736  |
| -0.187278568 | 1        | 0        |
| -0.364550783 | 0.858863 | 0.28225  |
| #NUM!        | 0.308068 | #NUM!    |
| #DIV/0!      | ?        | #DIV/0!  |
| 3.392317423  | 0.725052 | 2        |
| #DIV/0!      | 1        | #DIV/0!  |
| #DIV/0!      | ?        | #DIV/0!  |
| #DIV/0!      | 0.622002 | #DIV/0!  |
| #NUM!        | 0.785812 | -0.41504 |
| -2.700439718 | 0.459495 | -1.37851 |
| -2           | 0.433134 | -0.77761 |
| 1            | 0.885352 | 0.41504  |
| #DIV/0!      | 0        | #DIV/0!  |
| #NUM!        | 0.635978 | -0.80735 |
| 2            | 0.897841 | 0.58496  |
| -0.28442246  | 0.91273  | 0.10542  |
| 1            | 1        | 0        |
| -0.321928095 | 0.853549 | 0.34104  |
| -0.578730547 | 0.737068 | -0.50953 |
| 0.0371275    | 0.954031 | -0.0725  |
| 0.633217669  | 0.409096 | 1.26793  |
| -0.05259936  | 0.910341 | 0.11958  |
| 0.190564059  | 0.994648 | -0.01191 |
| 0.547244872  | 0.643664 | 0.6634   |



|              |          |          |
|--------------|----------|----------|
| 0.157572311  | 0.79822  | 0.44818  |
| 0.349942471  | 0.979892 | 0.04556  |
| -1.599037686 | 0.799951 | -0.36457 |
| -0.292052647 | 0.877679 | 0.2144   |
| -0.186026676 | 0.865845 | 0.22696  |
| -0.380146853 | 0.85058  | -0.3641  |
| -0.679373541 | 0.984222 | -0.02519 |
| -0.356808577 | 0.971649 | 0.04658  |
| 0.336165333  | 0.989016 | 0.03048  |
| -0.101494856 | 0.990232 | 0.02336  |
| -0.306673326 | 0.980289 | 0.04065  |
| -0.254246848 | 0.947068 | 0.09482  |
| -0.165586066 | 0.979831 | -0.04114 |
| 0.068370717  | 0.993827 | 0.01463  |
| -0.510350737 | 0.94105  | -0.09852 |
| -1.280074027 | 0.800755 | -0.35881 |
| -0.720042291 | 0.948834 | -0.09771 |
| -0.315148864 | 0.928134 | -0.14979 |
| -0.473394272 | 0.890758 | -0.2521  |
| -1.6440899   | 0.808836 | -0.39014 |
| -0.387891357 | 0.951108 | 0.07825  |
| -0.371267589 | 0.840558 | 0.14772  |
| -0.414951211 | 0.893687 | 0.13531  |
| -0.334985386 | 0.956942 | -0.08437 |
| -0.681363528 | 0.969936 | 0.02389  |
| -0.450676133 | 0.967408 | -0.05867 |
| -0.451139091 | 0.89303  | 0.12412  |
| -0.95281627  | 0.560399 | -0.30565 |
| 0.068801331  | 0.980257 | 0.045    |
| -0.656768392 | 0.87594  | -0.26423 |
| -0.852442812 | 0.962445 | -0.0822  |
| -0.406871922 | 0.97064  | 0.04663  |
| 0.098546584  | 0.962348 | -0.08228 |
| 0.418765186  | 0.52717  | 0.74931  |
| -1.066466296 | 0.8831   | 0.13921  |
| -1.150242636 | 0.664982 | -0.4634  |
| -0.093521483 | 0.991073 | 0.01975  |
| -0.289492145 | 0.72208  | 0.31778  |
| -0.33210588  | 0.938466 | -0.11703 |
| -1.321928095 | 0.703593 | 0.67807  |
| -0.642057656 | 0.987397 | 0.0176   |
| -0.607227109 | 0.928496 | -0.09265 |
| -0.600110327 | 0.975624 | 0.03078  |
| -0.35774097  | 0.964293 | 0.05691  |
| -0.521197958 | 0.931807 | -0.11524 |
| -0.609809881 | 0.989312 | 0.01688  |
| -0.728087443 | 0.768788 | -0.54154 |
| -0.47100961  | 0.960675 | -0.06885 |
| -0.175849835 | 0.915874 | -0.17585 |
| 0.530514717  | 0.809508 | 0.49304  |
| -1.199937571 | 0.781692 | 0.43382  |
| -0.321114425 | 0.978328 | -0.03722 |
| -0.401827733 | 0.989919 | 0.02101  |
| #DIV/0!      | ?        | #DIV/0!  |
| -0.897845456 | 0.781842 | -0.37428 |
| -0.113169873 | 0.975048 | -0.04911 |

|              |          |          |
|--------------|----------|----------|
| -0.00180496  | 0.958905 | 0.08971  |
| -0.107816415 | 0.646342 | -1.07481 |
| -0.525632032 | 0.973219 | -0.04474 |
| -0.528100164 | 0.857221 | -0.33284 |
| -0.802190343 | 0.923027 | -0.15177 |
| -0.314274522 | 0.997166 | -0.00615 |
| -0.142278584 | 0.989987 | 0.01746  |
| -0.366230348 | 0.97326  | 0.04319  |
| -0.681446025 | 0.874475 | 0.26778  |
| -0.388801621 | 0.938039 | -0.13145 |
| 0.004113175  | 0.88919  | 0.20686  |
| -0.410509876 | 0.970481 | 0.04803  |
| -0.765066668 | 0.95872  | -0.06708 |
| -0.248473679 | 0.912309 | 0.15124  |
| -0.684694847 | 0.915701 | -0.15691 |
| #DIV/0!      | 0.034897 | #DIV/0!  |
| #NUM!        | 0.622002 | -1       |
| -1.67232538  | 0.895421 | 0.15312  |
| -0.779874186 | 0.752854 | -0.42033 |
| -0.905535316 | 0.776444 | 0.29345  |
| -2.044394119 | 0.34416  | -1.34395 |
| -0.43394408  | 0.856296 | -0.25399 |
| 1.103537604  | 0.762608 | 0.71097  |
| -0.599013494 | 0.902476 | 0.11603  |
| -1           | 0.290131 | -1.48543 |
| -0.602091299 | 0.63483  | -0.79272 |
| -0.572524896 | 0.967035 | -0.06153 |
| -0.201381446 | 0.816383 | 0.28451  |
| -0.385636583 | 0.980886 | -0.04416 |
| -0.36753199  | 0.949988 | 0.08573  |
| -0.650486073 | 0.899437 | 0.18286  |
| -0.624490865 | 0.981138 | -0.02864 |
| -0.317433825 | 0.915018 | 0.12136  |
| -0.535351415 | 0.962066 | 0.07024  |
| -0.66218602  | 0.894385 | -0.20837 |
| -1.147513754 | 0.936193 | -0.12442 |
| -0.042994094 | 0.98267  | 0.03888  |
| 0.886343218  | 0.783381 | 0.57032  |
| -2.322671561 | 0.876324 | 0.23792  |
| -0.237990845 | 0.986604 | 0.02635  |
| -0.904123164 | 0.805764 | -0.42055 |
| 0.095642671  | 0.964327 | 0.06203  |
| -0.457101559 | 0.633984 | -1.00623 |
| -1.063752421 | 0.882301 | -0.22934 |
| -0.367208974 | 0.87095  | 0.19568  |
| -0.202188851 | 0.900352 | 0.16127  |
| -1.658864281 | 0.814225 | 0.27247  |
| -0.584962501 | 0.838446 | -0.36257 |
| -0.889390691 | 0.802676 | -0.40781 |
| -0.642447995 | 0.956491 | -0.06926 |
| -0.750860036 | 0.885893 | 0.20876  |
| -0.68219324  | 0.699516 | 0.26234  |
| -0.826780421 | 0.959416 | 0.07519  |
| -1.204311649 | 0.988873 | -0.01896 |
| -0.480511337 | 0.99856  | -0.00208 |
| -0.026800059 | 0.937135 | -0.12956 |

|              |           |          |
|--------------|-----------|----------|
| -1.194615194 | 0.844031  | -0.20211 |
| -0.489885738 | 0.928075  | -0.14663 |
| 0.182579474  | 0.773423  | 0.43958  |
| -0.216846311 | 0.999622  | 0.0008   |
| -0.684575425 | 0.975419  | 0.03842  |
| -2.589492159 | 0.306176  | -2.27302 |
| -0.422677372 | 0.937267  | -0.14057 |
| 0.463319008  | 0.976887  | -0.06024 |
| -0.516123624 | 0.863532  | 0.29345  |
| -0.634896766 | 0.948152  | -0.08218 |
| -0.349210849 | 0.9851    | -0.02335 |
| -4.857980995 | 0.0739784 | -2.78759 |
| 0.860368977  | 0.849376  | 0.39685  |
| -0.198752661 | 0.934563  | 0.12242  |
| 0.757541956  | 0.769608  | 0.51138  |
| #NUM!        | 1         | 0        |
| 0.357567445  | 0.857852  | 0.33416  |
| -0.303794828 | 0.981004  | -0.04067 |
| -0.278426456 | 0.949876  | 0.09495  |
| -0.853366761 | 0.92906   | -0.08355 |
| -0.312054808 | 0.904516  | 0.12803  |
| 0            | 0.450185  | #NUM!    |
| #NUM!        | 1         | 0        |
| -0.246179839 | 0.977594  | 0.04467  |
| -0.367956626 | 0.997755  | 0.00464  |
| -0.441810819 | 0.93613   | 0.07381  |
| -0.018821398 | 0.926983  | -0.16753 |
| -0.407934112 | 0.998391  | -0.00356 |
| -0.150625657 | 0.915885  | 0.13425  |
| -0.390925043 | 0.973114  | -0.04905 |
| -0.102475076 | 0.883106  | 0.1854   |
| -0.096959511 | 0.895402  | 0.13308  |
| -0.453605156 | 0.886565  | 0.11381  |
| -0.740185897 | 0.835562  | -0.12363 |
| -0.527583041 | 0.945523  | 0.07809  |
| -2.510961919 | 0.748298  | 0.27563  |
| -0.401507409 | 0.823228  | 0.18546  |
| -0.932002327 | 0.770921  | -0.40365 |
| -0.403284348 | 0.878853  | 0.19158  |
| -0.34038966  | 0.926698  | -0.17205 |
| -0.339951546 | 0.987445  | -0.02793 |
| -0.907645341 | 0.943881  | 0.05914  |
| -0.551282328 | 0.974056  | 0.0378   |
| -3.220729372 | 0.17888   | -3.04564 |
| -1.807354922 | 0.0312746 | #NUM!    |
| -0.48964734  | 0.926482  | 0.09823  |
| -0.253658436 | 0.989912  | -0.0165  |
| -1.678071905 | 0.82113   | -0.29956 |
| -0.568752274 | 0.917377  | 0.15445  |
| -0.686253405 | 0.928144  | -0.137   |
| #NUM!        | 1         | 0        |
| -0.581342185 | 0.88423   | -0.10524 |
| -0.569917256 | 0.955992  | -0.06043 |
| 0            | 1         | 0        |
| 1.584962501  | 0.513713  | 1.58496  |
| -0.950074775 | 0.623709  | 0.33205  |

|              |          |          |
|--------------|----------|----------|
| -0.405610016 | 0.939558 | -0.10293 |
| 0.125127387  | 0.921974 | 0.10726  |
| -0.206450877 | 0.732847 | -0.44746 |
| -0.595564017 | 0.92523  | -0.14899 |
| -0.135351853 | 0.890154 | -0.2332  |
| -0.285797449 | 0.992839 | 0.0141   |
| -1.159886219 | 0.783499 | 0.46618  |
| -0.169126503 | 0.992773 | -0.0149  |
| 0.330439595  | 0.976973 | 0.0462   |
| -0.690818422 | 0.964118 | -0.06358 |
| #DIV/0!      | ?        | #DIV/0!  |
| -2.146841388 | 0.956452 | 0.0902   |
| -0.718229032 | 0.850464 | -0.291   |
| 3            | 0.782716 | 1.58496  |
| -1.085729874 | 0.844846 | -0.24101 |
| -1           | 1        | 0        |
| -1.432959407 | 0.761421 | -0.43296 |
| -0.375509135 | 0.671116 | -0.77761 |
| -0.329987865 | 0.855166 | -0.28229 |
| -2.321928095 | 0.825659 | 0.26303  |
| 0.044079362  | 0.960733 | -0.07913 |
| -0.501577606 | 0.845383 | -0.34918 |
| 1.799087306  | 0.899665 | 0.48543  |
| -0.214124805 | 0.882262 | 0.2713   |
| -0.519608763 | 0.86309  | -0.26444 |
| 0.037453669  | 0.94117  | 0.13911  |
| -0.001780006 | 0.796704 | 0.41237  |
| -0.391508964 | 0.964902 | 0.06329  |
| -0.509013647 | 0.99176  | -0.01306 |
| -0.517461757 | 0.908924 | -0.17979 |
| -1.233035045 | 0.877713 | -0.25967 |
| -1.128947857 | 0.671073 | -0.4421  |
| -0.028400822 | 0.884247 | 0.20775  |
| -0.303805349 | 0.975952 | -0.04315 |
| -2.291603558 | 0.907856 | -0.16728 |
| -2.360402243 | 0.172302 | -3.98489 |
| 0.123148231  | 0.87108  | 0.27253  |
| 0.511252815  | 0.809486 | 0.47592  |
| -1.152003093 | 0.60813  | -0.8625  |
| 0.856635825  | 0.652816 | 0.89907  |
| -0.487009904 | 0.997529 | 0.00337  |
| -0.230513264 | 0.943081 | -0.11268 |
| -0.879705766 | 0.953734 | -0.0973  |
| -0.416569961 | 0.987617 | 0.02372  |
| -1.119460155 | 0.775277 | -0.52562 |
| -0.63342039  | 0.897802 | -0.19085 |
| -0.471377343 | 0.857104 | -0.31188 |
| 1.892602209  | 0.613377 | 1.26825  |
| -0.099535674 | 0.231327 | -1.90689 |
| -0.582462884 | 0.946348 | -0.09241 |
| -0.340254447 | 0.984542 | -0.02966 |
| -0.177978636 | 0.900339 | 0.19459  |
| -0.572046613 | 0.87706  | -0.30516 |
| -1.03562391  | 0.805599 | -0.40336 |
| -0.710493383 | 0.864376 | 0.18763  |
| -2           | 0.825659 | -0.41504 |

|              |          |          |
|--------------|----------|----------|
| -0.314174257 | 0.920549 | 0.16987  |
| -0.222392421 | 0.808782 | -0.48543 |
| -1.026732878 | 0.999345 | -0.0012  |
| -0.628335543 | 0.913791 | -0.17962 |
| -1.206653774 | 0.873762 | -0.18851 |
| #DIV/0!      | 0.450185 | #DIV/0!  |
| -0.511221224 | 0.817578 | -0.42644 |
| -3.459431619 | 0.805083 | -0.45943 |
| -1           | 0.764931 | 0.58496  |
| 0.533976496  | 0.842128 | -0.47644 |
| 0.246326199  | 0.881028 | 0.28566  |
| 1.216695691  | 0.62077  | 1.15101  |
| -0.235172689 | 0.996637 | -0.00696 |
| 0.020272395  | 0.893355 | 0.19986  |
| -0.818047118 | 0.991129 | -0.01033 |
| -0.566560529 | 0.977166 | -0.02711 |
| -0.411704802 | 0.971445 | 0.05046  |
| -0.469316334 | 0.940351 | -0.09814 |
| -0.795973729 | 0.918274 | 0.09033  |
| -0.693757829 | 0.957555 | -0.06735 |
| -0.151470635 | 0.962265 | -0.0788  |
| -0.429229556 | 0.946859 | 0.06427  |
| 0.023307373  | 0.920652 | 0.1767   |
| -0.130256386 | 0.93955  | -0.10771 |
| -0.469275812 | 0.939449 | 0.1045   |
| -0.714898562 | 0.940046 | -0.11358 |
| -0.50772346  | 0.951233 | -0.09492 |
| 0.381063219  | 0.778299 | 0.485    |
| -0.539766165 | 0.961925 | 0.05     |
| -1.174404792 | 0.741291 | -0.44406 |
| -0.377718841 | 0.909191 | -0.16762 |
| -0.448842194 | 0.924621 | 0.08913  |
| -0.409362582 | 0.826563 | -0.39259 |
| -0.18140401  | 0.94072  | -0.11236 |
| -0.714091128 | 0.938562 | -0.11658 |
| -0.463531106 | 0.965325 | 0.03939  |
| 0.142444265  | 0.875092 | 0.29999  |
| -0.662558906 | 0.985493 | 0.02417  |
| -0.394515175 | 0.990812 | 0.01542  |
| -0.320259275 | 0.871063 | 0.25074  |
| -0.911304869 | 0.996508 | 0.00318  |
| -0.440179044 | 0.856723 | 0.15033  |
| 0            | 1        | 0        |
| -0.440460197 | 0.842354 | 0.24204  |
| -0.639344071 | 0.714238 | -0.72781 |
| #NUM!        | 0.308068 | #NUM!    |
| 0.215222926  | 0.932399 | -0.16368 |
| -0.277735455 | 0.994148 | 0.01104  |
| -0.584962501 | 0.559404 | 0.73697  |
| -0.274556276 | 0.922364 | -0.18797 |
| 1.396517411  | 0.774418 | 0.78617  |
| -0.404130754 | 0.962358 | 0.0633   |
| -0.370239698 | 0.904595 | 0.16649  |
| 0.099765201  | 0.958788 | 0.09332  |
| 1.36923381   | 1        | 0        |
| -0.438573014 | 0.9684   | 0.05497  |

|              |          |          |
|--------------|----------|----------|
| -1           | 0.806588 | -0.41504 |
| -0.548429341 | 0.932803 | -0.11961 |
| -0.549014527 | 0.912349 | -0.13631 |
| -1.885256826 | 0.946885 | -0.07473 |
| 0.523873263  | 0.913349 | 0.1894   |
| 0            | 0.794393 | -0.55254 |
| 0.143590854  | 0.914786 | -0.19745 |
| -1.874469118 | 0.809021 | -0.45943 |
| -0.810398512 | 0.907771 | 0.15906  |
| -1.540568381 | 0.245265 | -1.41504 |
| -0.290133413 | 0.948249 | 0.08647  |
| 0.859469691  | 0.766788 | -0.90797 |
| -0.525628361 | 0.961016 | -0.07342 |
| -0.0489096   | 0.94952  | 0.10806  |
| -2.115477217 | 0.392404 | -1.11548 |
| -0.148032919 | 0.984304 | 0.02765  |
| -0.075247843 | 0.973955 | 0.04661  |
| -0.243586644 | 0.955361 | -0.0858  |
| #NUM!        | 1        | 0        |
| -0.212818178 | 0.961729 | -0.07563 |
| -0.475381913 | 0.937475 | -0.11226 |
| -0.617530363 | 0.888148 | -0.09311 |
| 1            | 0.622002 | #NUM!    |
| -0.547385939 | 0.943006 | -0.10361 |
| -1.222392421 | 0.75747  | 0.51457  |
| -0.847996907 | 0.574248 | -1.09954 |
| -0.532829696 | 0.998942 | 0.00139  |
| -0.193329021 | 0.986462 | -0.02678 |
| -0.429585808 | 0.966176 | 0.06063  |
| -0.129440939 | 0.965815 | 0.06303  |
| -0.545648545 | 0.974543 | 0.03081  |
| -0.500651187 | 0.885581 | -0.22905 |
| -0.231653991 | 0.911281 | -0.17371 |
| -0.54494326  | 0.985238 | 0.02814  |
| -0.379877705 | 0.886667 | 0.18085  |
| -0.109686693 | 0.949666 | 0.09132  |
| -0.116910311 | 0.992331 | -0.01382 |
| 0.523561956  | 0.794308 | 0.52356  |
| 0.736965594  | 0.501752 | 1.5025   |
| -0.480031735 | 0.885218 | 0.19761  |
| -0.872914038 | 0.951293 | -0.08924 |
| -0.253589493 | 0.793108 | -0.43525 |
| -0.64706276  | 0.871599 | -0.28175 |
| -0.679508137 | 0.92308  | -0.1393  |
| 1.110299166  | 0.50983  | 1.22634  |
| -0.229481846 | 0.812912 | -0.33258 |
| -0.131529623 | 0.983489 | -0.03484 |
| -0.179706022 | 0.875644 | -0.31868 |
| -0.028381801 | 0.967592 | 0.07306  |
| -0.484950769 | 0.943853 | -0.10618 |
| -0.936474862 | 0.895029 | -0.14634 |
| -0.408670485 | 0.982405 | 0.03205  |
| -0.46891039  | 0.977457 | -0.04128 |
| -0.407162176 | 0.835605 | -0.412   |
| -0.393458397 | 0.959314 | -0.08235 |
| -0.086156644 | 0.768348 | -0.55394 |

|              |           |          |
|--------------|-----------|----------|
| -0.636596694 | 0.892597  | -0.2128  |
| -2.624490865 | 0.203786  | -2.20945 |
| 2.215728691  | 0.772377  | 1.0902   |
| -0.346376085 | 0.872578  | -0.27253 |
| -0.486527065 | 0.937913  | 0.11674  |
| -2.584962501 | 0.0877066 | -2.58496 |
| -0.167456746 | 0.911399  | -0.18607 |
| -0.173812241 | 0.948802  | -0.10123 |
| -0.392504603 | 0.954276  | -0.0753  |
| 2.136538833  | 0.683308  | 1.42824  |
| -0.132182485 | 0.944421  | -0.11596 |
| -0.316290987 | 0.875219  | 0.22654  |
| -0.441997025 | 0.922132  | -0.17797 |
| 0.550197083  | 0.821433  | 0.3322   |
| -0.487877395 | 0.944574  | -0.11007 |
| 0.057715498  | 0.932858  | -0.16625 |
| -0.574583355 | 0.812445  | -0.39264 |
| -0.174624477 | 0.963242  | 0.07836  |
| -0.462185448 | 0.895677  | -0.19265 |
| -0.407853941 | 0.878428  | 0.20271  |
| -0.205767205 | 0.772905  | 0.50846  |
| -1.125430691 | 0.943886  | 0.08246  |
| -0.520585426 | 0.909116  | -0.19151 |
| 0.328273754  | 0.749308  | 0.40588  |
| -0.311481307 | 0.891907  | -0.24835 |
| -0.205377558 | 0.974928  | 0.05718  |
| -1.247742754 | 0.911253  | -0.14938 |
| 1.21649182   | 0.721751  | 0.90046  |
| -0.215631537 | 0.9542    | 0.10174  |
| -0.091651574 | 0.85377   | 0.2596   |
| -0.05270705  | 0.906778  | 0.19345  |
| -0.223276035 | 0.986025  | -0.02342 |
| 0.777607579  | 0.400619  | 1        |
| -0.129722735 | 0.866685  | 0.23114  |
| -0.021695071 | 0.969072  | -0.0713  |
| 0.872864876  | 0.735289  | 0.74821  |
| -0.452873962 | 0.983306  | 0.02369  |
| -0.598104616 | 0.959262  | 0.07643  |
| -0.737698152 | 0.85258   | -0.3343  |
| -0.074638801 | 0.855735  | 0.334    |
| -0.648461356 | 0.938386  | -0.12903 |
| -0.239921498 | 0.903017  | 0.19897  |
| 0.584962501  | 0.885352  | -0.41504 |
| -0.807354922 | 0.878464  | 0.25154  |
| 0.055495113  | 0.703864  | 0.59436  |
| 0            | 0.513713  | 1.58496  |
| #DIV/0!      | 0.387138  | #DIV/0!  |
| -3.263034406 | 0.486864  | -1.26303 |
| -0.131244533 | 0.938487  | -0.15433 |
| -2.385192988 | 0.59237   | -1.01436 |
| -1.862496476 | 0.723386  | -0.51457 |
| -1.074949411 | 0.933059  | -0.1414  |
| -0.415037499 | 0.474021  | 0.58496  |
| -0.989875783 | 0.838268  | -0.298   |
| #DIV/0!      | 0.3832    | #DIV/0!  |
| -0.070389328 | 1         | 0        |

|              |          |          |
|--------------|----------|----------|
| -1.584962501 | 0.513713 | 0.73697  |
| -1.279254758 | 0.80785  | -0.41376 |
| 0.847996907  | 0.251791 | 2.37851  |
| -0.152840173 | 0.994977 | -0.00964 |
| -0.54641492  | 0.908007 | -0.19464 |
| -0.386769774 | 0.982327 | 0.02287  |
| 1.343407822  | 0.985832 | 0.05311  |
| #DIV/0!      | 1        | #DIV/0!  |
| -2.828330134 | 0.944379 | 0.10737  |
| -0.331205908 | 0.939008 | -0.1289  |
| -0.675629714 | 0.956277 | -0.07587 |
| -0.935322497 | 0.76414  | -0.48739 |
| -0.305670816 | 0.951908 | 0.08279  |
| -0.517782499 | 0.986673 | 0.0187   |
| 0.409875794  | 0.943037 | 0.15612  |
| -0.095157233 | 0.904539 | 0.22677  |
| -1.14345279  | 0.903216 | -0.21056 |
| -1.124447371 | 0.785876 | 0.40981  |
| -0.450085593 | 0.904643 | 0.1741   |
| 1.499926397  | 0.727907 | 0.80527  |
| -3.906890596 | 0.519918 | -1.32193 |
| -0.136795047 | 0.881339 | 0.14804  |
| -0.822173131 | 0.968617 | -0.04669 |
| 1.195370438  | 0.545569 | 1.3487   |
| -0.571838011 | 0.928542 | 0.13737  |
| -0.611467135 | 0.849573 | -0.31872 |
| -0.168093691 | 0.984017 | -0.03226 |
| -0.778746698 | 0.733238 | -0.53984 |
| -1           | 0.523243 | -1       |
| -0.584962501 | 0.559404 | -1.58496 |
| #DIV/0!      | ?        | #DIV/0!  |
| 1.864721141  | 0.707927 | 1.16     |
| -1.543443231 | 0.789048 | -0.40455 |
| -1.483856689 | 0.863145 | -0.26986 |
| -0.857591271 | 0.981387 | 0.03694  |
| -0.249519599 | 0.924433 | -0.17897 |
| -0.214665903 | 0.973875 | -0.06016 |
| -0.906530176 | 0.672635 | -0.79471 |
| -1.648834684 | 0.918719 | -0.1749  |
| -0.337546056 | 0.916013 | -0.18554 |
| -1.028270566 | 0.807731 | -0.4219  |
| -0.005523039 | 0.953766 | 0.10111  |
| -0.213857383 | 0.918437 | -0.18731 |
| -0.170720372 | 0.952008 | -0.10319 |
| -0.87024881  | 0.993927 | -0.00953 |
| -0.359669651 | 0.960924 | -0.06571 |
| -0.358905436 | 0.917751 | 0.12805  |
| -0.036513293 | 0.883362 | 0.20549  |
| -0.567867968 | 0.941926 | -0.12789 |
| -0.586264617 | 0.88941  | 0.2081   |
| -0.285190786 | 0.958344 | 0.06629  |
| -0.053432738 | 0.945924 | -0.11875 |
| -0.594973442 | 0.872242 | -0.24477 |
| 0.508059051  | 0.622384 | 0.76015  |
| 0.461938474  | 0.729864 | 0.54683  |
| -0.488234902 | 0.661829 | 0.75288  |



|              |          |          |
|--------------|----------|----------|
| -0.077378711 | 0.891161 | 0.16352  |
| -0.459396665 | 0.962593 | 0.05821  |
| -0.460982626 | 0.948651 | -0.09876 |
| -0.226618804 | 0.898588 | -0.21023 |
| -0.635034062 | 0.94313  | 0.08329  |
| -0.512777771 | 0.896385 | -0.20994 |
| -0.304454333 | 0.958236 | -0.08166 |
| -0.201575073 | 0.918278 | 0.14209  |
| -0.478568583 | 0.934084 | 0.08489  |
| -0.601741118 | 0.953211 | -0.078   |
| -0.602915463 | 0.983195 | 0.02788  |
| -0.688939573 | 0.934805 | -0.10601 |
| -0.127807025 | 0.973571 | -0.05766 |
| -0.51747948  | 0.968386 | -0.05116 |
| #NUM!        | 1        | 0        |
| -0.633425329 | 0.943163 | -0.09465 |
| -0.286949443 | 0.954877 | -0.08463 |
| -0.552826334 | 0.856364 | -0.29307 |
| -0.518141971 | 0.945229 | -0.0898  |
| -0.234916731 | 0.971584 | -0.05474 |
| -0.23271179  | 0.923741 | -0.16924 |
| -0.623436649 | 0.888163 | -0.17468 |
| -0.628102776 | 0.966776 | -0.06603 |
| -0.468748086 | 0.974671 | -0.05371 |
| -0.438981366 | 0.914042 | -0.18586 |
| -0.594531882 | 0.914683 | -0.16503 |
| -0.452843242 | 0.920524 | -0.18548 |
| -0.417466571 | 0.999281 | 0.00156  |
| -0.432230116 | 0.99872  | 0.0025   |
| -0.532811883 | 0.932342 | -0.14441 |
| -0.440031879 | 0.987478 | 0.02118  |
| -0.448007079 | 0.947333 | 0.06643  |
| -0.306640328 | 0.944149 | 0.09351  |
| -0.402306773 | 0.978758 | -0.03365 |
| -2.539975046 | 0.481806 | -1.21501 |
| -0.526823069 | 0.694089 | -0.66945 |
| -0.581210366 | 0.94402  | -0.08778 |
| 0.147029656  | 0.89995  | -0.23323 |
| -0.334817607 | 0.92819  | -0.07236 |
| -1.637689077 | 0.979239 | -0.04116 |
| -0.192908319 | 0.978974 | -0.03922 |
| -0.196812501 | 0.952577 | 0.08629  |
| 0            | 0.860525 | -0.41504 |
| -0.637823186 | 0.951472 | 0.07275  |
| -0.808428304 | 0.908181 | -0.14952 |
| -0.185778984 | 0.825001 | 0.32097  |
| -0.298933904 | 0.98892  | 0.01566  |
| -0.582099604 | 0.730848 | 0.26617  |
| -0.764499443 | 0.944187 | -0.11755 |
| -0.337484355 | 0.943855 | -0.11779 |
| -3.169925001 | 0.478913 | -1.58496 |
| -0.344189968 | 0.592006 | 0.61698  |
| -0.098684275 | 0.957277 | 0.06982  |
| -0.445774799 | 0.94622  | 0.08505  |
| -0.660937823 | 0.901816 | 0.14243  |
| -0.776424945 | 0.800295 | -0.25824 |

|              |           |          |
|--------------|-----------|----------|
| -0.687433944 | 0.895611  | -0.16498 |
| -0.237856389 | 0.92738   | -0.1338  |
| -1.279520649 | 0.534693  | 0.49669  |
| -0.651602711 | 0.874915  | -0.21041 |
| -0.373497758 | 0.899783  | 0.16511  |
| -1.853516019 | 0.901937  | 0.17362  |
| -0.341734953 | 0.887318  | 0.15847  |
| -0.285242071 | 0.768201  | 0.27558  |
| -0.358735216 | 0.99025   | -0.02052 |
| -0.510049934 | 0.987843  | -0.01748 |
| -1.610957709 | 0.932272  | 0.05889  |
| -1.192126378 | 0.724719  | -0.5398  |
| -1.391267299 | 0.799339  | 0.23552  |
| -2.178639901 | 0.134474  | 0.29077  |
| -0.217569333 | 0.96395   | 0.07635  |
| -0.426708092 | 0.623143  | 0.37017  |
| -0.441162916 | 0.990485  | 0.01534  |
| -0.562594688 | 0.905211  | -0.1587  |
| 0.415037499  | 0.0876961 | 1.51457  |
| 0            | 1         | 0        |
| #DIV/0!      | ?         | #DIV/0!  |
| -0.321928095 | 0.462495  | 0.848    |
| #DIV/0!      | 0.308068  | #DIV/0!  |
| -1.584962501 | 0.825659  | 0.41504  |
| -1.584962501 | 0.888898  | 0.22239  |
| -2.906890596 | 0.579351  | -1.09954 |
| -0.881355504 | 0.885537  | -0.22239 |
| -1.362570079 | 0.519918  | 0.58496  |
| 0.049753035  | 0.94768   | 0.12131  |
| 1.584962501  | 0.613399  | 1.58496  |
| -0.169925001 | 0.662394  | -1.16993 |
| -0.4639471   | 0.935909  | 0.10434  |
| -1.807354922 | 0.47668   | -1.80735 |
| -0.485426827 | 0.770719  | -0.48543 |
| -0.819427754 | 0.626832  | -0.90689 |
| 0.462971976  | 0.840205  | 0.40526  |
| 1.280107919  | 1         | 0        |
| -1.678071905 | 0.824188  | 0.24793  |
| -0.321928095 | 0.810378  | -0.44746 |
| -1.321928095 | 0.499013  | -1.73697 |
| -0.519374159 | 0.849601  | 0.18845  |
| -1.015941544 | 0.728832  | -0.64981 |
| -0.337034987 | 0.778929  | 0.32193  |
| 0            | 0.633442  | 0.63743  |
| 2            | 0.567924  | 2        |
| 0.469485283  | 0.810735  | 0.46949  |
| -0.338801913 | 0.843802  | -0.3388  |
| -0.415037499 | 0.960913  | 0.08746  |
| -0.906890596 | 0.584131  | -1.32193 |
| -0.765534746 | 0.858433  | -0.28011 |
| -1.584962501 | 1         | 0        |
| 0.847996907  | 0.617945  | 1        |
| -1.047305715 | 0.711344  | -0.63227 |
| -0.04580369  | 1         | 0        |
| -1.736965594 | 0.75747   | -0.51457 |
| -1.2410081   | 0.97613   | -0.05658 |

|              |          |          |
|--------------|----------|----------|
| -0.584962501 | 0.756486 | 0.41504  |
| 0.415037499  | 0.89825  | -0.30485 |
| 1            | 0.622002 | 1        |
| -1.169925001 | 0.562529 | 0.63743  |
| -0.08246216  | 0.653997 | -1       |
| -0.807354922 | 0.861446 | -0.12928 |
| 0.231325546  | 0.975823 | 0.0614   |
| -0.164386818 | 0.953182 | 0.08616  |
| 0.415037499  | 0.663808 | -1.58496 |
| 23.32864384  | 0.308068 | 59.6374  |
| -1.688055994 | 0.472001 | -1.68806 |
| 0.056583528  | 0.871611 | 0.1635   |
| 0.330148602  | 0.561843 | 0.57116  |
| -0.415037499 | 0.657795 | 0.58496  |
| -0.20029865  | 0.424419 | 0.94555  |
| #NUM!        | 1        | 0        |
| -0.736965594 | 0.962045 | 0.09311  |
| #NUM!        | 1        | 0        |
| 0.652076697  | 0.792666 | 0.65208  |
| 0.138976413  | 0.980261 | -0.04947 |
| #NUM!        | 0.308068 | #NUM!    |
| 0.438573014  | 0.448631 | 0.70627  |
| -1.321928095 | 0.478963 | -1.73697 |
| 0            | 0.756486 | 0.58496  |
| -0.093109404 | 1        | 0        |
| #DIV/0!      | 0.308068 | #DIV/0!  |
| 0            | 1        | 0        |
| -0.552541023 | 0.86943  | 0.21299  |
| #DIV/0!      | 0.622002 | #DIV/0!  |
| 1.584962501  | 0.523243 | 2        |
| -0.943416472 | 0.890462 | -0.18442 |
| 0            | 0.873378 | 0.24793  |
| -0.127755547 | 0.695844 | 0.50967  |
| -0.192645078 | 0.685038 | 0.32193  |
| -0.736965594 | 0.358909 | 1.20163  |
| -1           | 0.695905 | 0.42269  |
| #NUM!        | 0.308068 | #NUM!    |
| #DIV/0!      | 1        | #DIV/0!  |
| #DIV/0!      | 0.450185 | #DIV/0!  |
| 0.823122238  | 0.157757 | 1.34395  |
| -0.440572591 | 0.871092 | -0.24793 |
| 0.133266531  | 0.30796  | 1.7669   |
| #DIV/0!      | 0.187993 | #DIV/0!  |
| #DIV/0!      | ?        | #DIV/0!  |
| 1.807354922  | 0.347398 | 2.78427  |
| -0.788495895 | 0.835228 | 0.27563  |
| 0.289506617  | 0.844258 | -0.36257 |
| 0.192645078  | 0.904922 | -0.22239 |
| 75.26506409  | 1        | 35.4195  |
| 0            | 0.530478 | -1       |
| #DIV/0!      | ?        | #DIV/0!  |
| -0.584962501 | 0.756486 | 0.41504  |
| 1.321928095  | 0.837425 | -1       |
| 0.099535674  | 0.927665 | 0.19265  |
| -2           | 0.698562 | 0.58496  |
| 1.584962501  | 0.651448 | 1        |

|              |          |          |
|--------------|----------|----------|
| #NUM!        | 0.495025 | -1.58496 |
| #DIV/0!      | 0        | #DIV/0!  |
| -3.321928095 | 0.783763 | -0.51457 |
| 1            | 0.495025 | 1.58496  |
| #DIV/0!      | 0.785812 | #DIV/0!  |
| -1           | 0.353387 | #NUM!    |
| #NUM!        | 0.308068 | #NUM!    |
| 0.584962501  | 0.252804 | 2.27302  |
| #DIV/0!      | 1        | #DIV/0!  |
| #NUM!        | 0.785812 | -0.41504 |
| -0.938599455 | 0.532042 | -0.71621 |
| #DIV/0!      | 0.308068 | #DIV/0!  |
| #DIV/0!      | ?        | #DIV/0!  |
| #NUM!        | 0.308068 | #NUM!    |
| -1           | 0.818729 | -0.41504 |
| 0            | 0.544734 | 1        |
| 1            | 0.622002 | #NUM!    |
| 1.321928095  | 1        | 0        |
| 0            | 0.513713 | -1.58496 |
| #DIV/0!      | 0.785812 | #DIV/0!  |
| -0.406625259 | 0.750367 | -0.58496 |
| #DIV/0!      | 0.308068 | #DIV/0!  |
| #DIV/0!      | 0.116158 | #DIV/0!  |
| 0            | 0.450185 | #NUM!    |
| 0.321928095  | 0.514418 | 0.39232  |
| #DIV/0!      | ?        | #DIV/0!  |
| #DIV/0!      | 0.308068 | #DIV/0!  |
| -0.514573173 | 0.909362 | 0.1375   |
| -0.584962501 | 0.937221 | 0.11548  |
| 0.099535674  | 0.865624 | -0.34792 |
| 2.321928095  | 0.246542 | 4.39232  |
| 0.351165316  | 0.443808 | 0.5659   |
| 1            | 0.504245 | 0.88452  |
| -0.584962501 | 1        | 0        |
| -1           | 0.577083 | -0.41504 |
| 0.137503524  | 0.923545 | 0.1375   |
| 0.165700416  | 0.626468 | 0.50027  |
| -0.198904068 | 0.847789 | 0.28652  |
| #DIV/0!      | 0.308068 | #DIV/0!  |
| 0            | 0.308068 | #NUM!    |
| #DIV/0!      | ?        | #DIV/0!  |
| -1           | 0.892901 | -0.26303 |
| 0.432959407  | 0.602997 | 0.53605  |
| 0.584962501  | 0.430042 | 1.58496  |
| -0.757757396 | 0.96009  | -0.07131 |
| -0.529510054 | 0.947774 | 0.04925  |
| -0.357465969 | 0.965271 | 0.04873  |
| -0.620394977 | 0.962917 | 0.04191  |
| -0.507155701 | 0.701901 | 0.2766   |
| -0.663521267 | 0.983833 | 0.01616  |
| -1.086228727 | 0.441853 | -0.32009 |
| -0.138452228 | 0.699359 | 0.34548  |
| -0.624947109 | 0.95693  | 0.05136  |
| -0.696874347 | 0.98545  | 0.00904  |
| -0.48845325  | 0.507606 | 0.28018  |
| -0.552906454 | 0.574503 | 0.24153  |

|              |          |          |
|--------------|----------|----------|
| -0.958671603 | 0.50697  | -0.23207 |
| 0.408891631  | 0.948417 | -0.1251  |
| -0.137503524 | 0.979402 | 0.03533  |
| 0.502041541  | 0.75563  | 0.61328  |
| 0.178337241  | 0.949389 | -0.11864 |
| 0            | 1        | 0        |
| -0.382018571 | 0.957968 | 0.04504  |
| -0.364596282 | 0.899989 | 0.14361  |
| -0.456407428 | 0.93367  | 0.08296  |
| -1.748864908 | 0.85923  | -0.22889 |
| -0.563088001 | 0.872194 | -0.13724 |
| -0.723582716 | 0.978346 | 0.02474  |
| -0.283185149 | 0.903321 | -0.22211 |
| -0.372440293 | 0.951699 | -0.09342 |
| 0.312323813  | 0.73849  | 0.44129  |
| -0.502184261 | 0.99751  | 0.00349  |
| -0.755688205 | 0.92684  | 0.13192  |
| -0.232582249 | 0.931804 | 0.14508  |
| -0.663412124 | 0.984957 | -0.02162 |
| 0.092802811  | 0.965333 | -0.06077 |
| -0.645979075 | 0.912881 | 0.09759  |
| -0.338416218 | 0.991558 | -0.01318 |
| -0.382469637 | 0.985825 | 0.02287  |
| -0.498278442 | 0.962466 | -0.0747  |
| -0.594312961 | 0.972347 | -0.03273 |
| -0.232258574 | 0.973794 | -0.05465 |
| -0.15565087  | 0.893636 | -0.24026 |
| -0.515751882 | 0.950201 | -0.0619  |
| -0.605568575 | 0.951763 | -0.08797 |
| -0.084209399 | 0.895158 | 0.17205  |
| -0.204233052 | 0.959167 | 0.0631   |
| -0.409534987 | 0.887562 | 0.17676  |
| -0.489890503 | 0.838234 | -0.24873 |
| -0.735313158 | 0.895195 | -0.15389 |
| -0.731004036 | 0.909225 | -0.18117 |
| -0.039001771 | 0.994436 | -0.01176 |
| -0.29565794  | 0.890101 | -0.2519  |
| -0.028758993 | 0.846175 | 0.34752  |
| -0.359842867 | 0.830545 | 0.20454  |
| -0.334037777 | 0.938584 | -0.11402 |
| -0.582937665 | 0.500991 | -0.74781 |
| -0.012600037 | 0.802664 | 0.34433  |
| -0.493390205 | 0.831929 | 0.26209  |
| 0.728063966  | 0.987885 | 0.03135  |
| -0.227995128 | 0.9611   | -0.08218 |
| -0.395786357 | 0.889854 | 0.18621  |
| -0.626584551 | 0.718187 | 0.21887  |
| -0.761887426 | 0.986515 | -0.01417 |
| -0.485426827 | 0.768413 | -0.34792 |
| -1.840344947 | 0.645876 | -0.53746 |
| -0.293412723 | 0.954614 | 0.08469  |
| -0.316715413 | 0.978027 | -0.04987 |
| -1.12701641  | 0.838895 | -0.32704 |
| -0.348057827 | 0.849914 | 0.29273  |
| -0.539571791 | 0.758012 | -0.56914 |
| -0.541772132 | 0.971455 | -0.06428 |

|              |          |          |
|--------------|----------|----------|
| 1.855300386  | 0.569064 | 1.68935  |
| -0.554105259 | 0.858432 | 0.18093  |
| -0.155272968 | 0.947187 | -0.12114 |
| -0.544945481 | 0.90462  | -0.2125  |
| -0.483305831 | 0.986019 | -0.02924 |
| 0.070389328  | 0.971162 | 0.07039  |
| -0.73500807  | 0.738218 | -0.28137 |
| 0.06728813   | 0.960842 | -0.07864 |
| -0.377296608 | 0.899445 | -0.18876 |
| -0.731156535 | 0.954602 | 0.07339  |
| -0.258918297 | 0.978656 | 0.0367   |
| 2.790076931  | 0.347138 | 2.58496  |
| -1.360839191 | 0.769139 | -0.41908 |
| -0.002655968 | 0.613236 | 0.51451  |
| -1.132398461 | 0.772195 | 0.19994  |
| #NUM!        | 0.495025 | -0.73697 |
| -0.159597826 | 0.923812 | -0.15799 |
| 0.165202591  | 0.90239  | -0.25141 |
| -1.760439207 | 0.761737 | -0.45886 |
| -0.26239022  | 0.950115 | -0.08822 |
| -0.733057253 | 0.928486 | -0.12185 |
| -0.243998108 | 0.955867 | 0.08243  |
| -0.314299427 | 0.876673 | 0.22004  |
| -0.365335685 | 0.942252 | -0.11442 |
| 0            | 0.998498 | -0.00334 |
| 0.264528094  | 0.726012 | 0.56481  |
| -0.584962501 | 0.806588 | 0.22239  |
| -0.104469267 | 0.959173 | -0.08746 |
| 0.403355694  | 0.930577 | -0.19398 |
| 0.275026309  | 0.949164 | -0.11898 |
| -0.392088896 | 0.98846  | -0.02362 |
| #NUM!        | 0.622002 | 1        |
| -0.248575483 | 0.983504 | -0.02498 |
| -1.352516415 | 0.76456  | -0.43468 |
| -0.425130051 | 0.989662 | 0.01916  |
| 0            | 0.951474 | -0.10692 |
| -0.308020572 | 0.894176 | -0.23832 |
| #NUM!        | 0.308068 | #NUM!    |
| 0.194816177  | 0.91248  | 0.15634  |
| -0.623515741 | 0.965009 | -0.0628  |
| -0.464266716 | 1        | 0        |
| -0.439829559 | 0.974497 | 0.04015  |
| -0.520256811 | 0.820258 | -0.3816  |
| -0.273630013 | 0.833593 | 0.20919  |
| -0.410399782 | 0.963654 | 0.06174  |
| -0.399774682 | 0.944299 | 0.08502  |
| -0.266062395 | 0.982507 | -0.03937 |
| -0.394278939 | 0.968601 | 0.05387  |
| -0.558697305 | 0.955225 | 0.06708  |
| -0.42303029  | 0.99745  | -0.00436 |
| -0.703448468 | 0.992618 | -0.01021 |
| -0.849841175 | 0.772417 | -0.18414 |
| -0.276916115 | 0.502115 | 0.41183  |
| -0.099488803 | 0.904652 | 0.1167   |
| -0.485426827 | 0.877828 | -0.14439 |
| -0.262418826 | 0.632417 | -0.77871 |

|              |          |          |
|--------------|----------|----------|
| -0.088572413 | 0.800265 | 0.40553  |
| -0.153746031 | 0.958956 | -0.09771 |
| -0.295877563 | 0.990655 | 0.02159  |
| #NUM!        | 0.241875 | -2.73697 |
| -0.358092423 | 0.95577  | -0.09815 |
| -0.44973512  | 0.897295 | -0.19622 |
| -0.210237379 | 0.942586 | 0.09088  |
| -0.468685962 | 0.937858 | 0.10863  |
| -0.898120386 | 0.956499 | -0.04537 |
| -2.473931188 | 0.697408 | -0.64386 |
| -1.354842717 | 0.460115 | -0.76988 |
| #NUM!        | 0.308068 | #NUM!    |
| -0.035456627 | 0.983586 | -0.03739 |
| #DIV/0!      | ?        | #DIV/0!  |
| 0.619727919  | 0.678605 | 0.70854  |
| #DIV/0!      | ?        | #DIV/0!  |
| #DIV/0!      | 0.353387 | #DIV/0!  |
| -0.00189817  | 0.983103 | -0.03332 |
| -0.468875206 | 0.982595 | -0.02602 |
| -1.284374895 | 0.674456 | -0.69427 |
| -0.409298728 | 0.603903 | 0.58527  |
| -1.343954401 | 0.697288 | 0.63509  |
| -1.321928095 | 0.496191 | -1.05889 |
| -0.64385619  | 0.822487 | -0.39593 |
| 0.648414757  | 0.633812 | 0.86863  |
| -1.152713606 | 0.93384  | 0.11712  |
| -1.35425715  | 0.768009 | -0.48799 |
| 0.390789953  | 0.897531 | -0.24393 |
| -0.340836557 | 0.941902 | 0.09472  |
| -0.356964534 | 0.874062 | -0.27402 |
| -1.033947332 | 0.136713 | -1.03395 |
| -1.906890596 | 0.579351 | -1.09954 |
| -0.184645957 | 0.940902 | -0.10663 |
| -0.525278943 | 0.888181 | -0.2488  |
| -0.574410928 | 0.957673 | -0.05363 |
| -0.575227051 | 0.854456 | -0.29574 |
| -0.319711122 | 0.927875 | -0.15256 |
| -0.240063744 | 0.988348 | -0.01853 |
| -0.730813367 | 0.840226 | 0.35845  |
| -0.370203689 | 0.808402 | 0.24959  |
| 0.25627704   | 0.745896 | 0.4777   |
| -0.293375991 | 0.917093 | 0.12963  |
| -1.931925991 | 0.785271 | -0.32034 |
| -0.754348085 | 0.998953 | 0.00202  |
| -0.275732296 | 0.77945  | 0.40501  |
| -0.972161305 | 0.913092 | -0.16517 |
| -1.164386818 | 0.996194 | -0.00742 |
| -0.168976172 | 0.988922 | 0.0198   |
| -0.336812332 | 0.972172 | -0.05828 |
| -0.722466024 | 0.867468 | 0.20353  |
| -0.714597781 | 0.851554 | 0.08879  |
| -0.423481598 | 0.93044  | -0.14854 |
| -1.184963796 | 0.975902 | -0.04046 |
| -0.151622385 | 0.996014 | 0.00684  |
| -0.15244441  | 0.531737 | 0.61546  |
| -0.54014942  | 0.858629 | 0.09692  |

|              |          |          |
|--------------|----------|----------|
| -0.283895296 | 0.982224 | 0.03085  |
| -0.066959814 | 0.825669 | 0.32954  |
| -0.123352541 | 0.869628 | 0.27857  |
| -0.421772333 | 0.852005 | -0.26131 |
| 0.22881869   | 0.887287 | -0.21864 |
| -0.478318319 | 0.993779 | 0.00954  |
| -0.693576325 | 0.994874 | 0.00892  |
| -0.474058013 | 0.887887 | -0.24579 |
| -0.455499496 | 0.860075 | 0.1776   |
| -0.577509659 | 0.954424 | -0.07471 |
| 0.011495639  | 0.783158 | 0.2916   |
| -0.225087537 | 0.94222  | -0.12832 |
| -0.083075673 | 0.900464 | 0.2385   |
| -0.519893011 | 0.932768 | 0.12736  |
| -1.302684407 | 0.845887 | 0.13638  |
| -0.488741736 | 0.884616 | 0.1332   |
| 0.5360529    | 0.945624 | -0.12928 |
| -0.687242273 | 0.962722 | 0.06062  |
| -0.263034406 | 0.892901 | -0.26303 |
| -0.330905062 | 0.911376 | 0.10803  |
| -0.138069953 | 0.896176 | 0.13312  |
| -0.278484014 | 0.992626 | -0.01218 |
| -0.436764002 | 0.968725 | -0.05169 |
| -0.350354652 | 0.930452 | 0.09968  |
| -0.23768124  | 0.926135 | 0.09529  |
| -0.477675593 | 0.930969 | -0.1261  |
| -0.288183098 | 0.948122 | -0.10807 |
| -0.499934719 | 0.92079  | -0.13526 |
| -1.034923742 | 0.902579 | -0.1306  |
| 0.044270267  | 0.908449 | 0.17672  |
| -0.072662363 | 0.706782 | 0.36136  |
| -0.661745881 | 0.934991 | -0.05334 |
| -0.222948849 | 0.989255 | 0.02192  |
| -2.089600695 | 0.903307 | 0.16279  |
| -1.184424571 | 0.870265 | 0.24691  |
| -0.363232123 | 0.971047 | 0.04687  |
| -0.499321468 | 0.953572 | -0.0652  |
| -0.285474317 | 0.992577 | 0.01402  |
| -0.609853676 | 0.880565 | 0.10696  |
| -0.271079398 | 0.705371 | 0.41116  |
| -0.513705794 | 0.94932  | 0.08904  |
| -0.448109338 | 0.959485 | -0.0625  |
| -0.277695052 | 0.979658 | 0.03572  |
| -0.522295599 | 0.975799 | 0.02964  |
| -0.168140153 | 0.947382 | 0.08704  |
| -0.889049283 | 0.82676  | 0.26013  |
| -0.544409783 | 0.580127 | 0.23149  |
| 0            | 0.872456 | 0.25376  |
| -0.393331028 | 0.964524 | 0.05557  |
| -0.392667634 | 0.701975 | 0.23543  |
| 0.071740569  | 0.966655 | 0.06805  |
| -0.487651578 | 0.923873 | 0.13225  |
| -0.110323415 | 0.978758 | 0.05215  |
| -0.294733168 | 0.920506 | -0.17021 |
| -0.338501126 | 0.97306  | -0.05797 |
| 0.158964976  | 0.950552 | 0.11307  |



|              |          |          |
|--------------|----------|----------|
| -0.084564295 | 0.786459 | 0.31333  |
| -0.469485283 | 0.685276 | -0.52607 |
| 0.299560282  | 0.926284 | 0.20645  |
| -0.367154418 | 0.961583 | -0.05647 |
| -0.274298047 | 0.928845 | 0.08794  |
| -0.335317079 | 0.924931 | 0.07942  |
| -0.532017707 | 0.955451 | 0.06101  |
| 1.706707773  | 0.822173 | -0.77372 |
| -0.560631788 | 0.590835 | -0.83699 |
| -0.878529944 | 0.861999 | -0.28862 |
| -1.211504105 | 0.977867 | -0.03317 |
| -1.428135488 | 0.978661 | 0.02961  |
| 1.049105472  | 0.831268 | 0.43329  |
| -0.370208722 | 0.769127 | 0.26155  |
| 0.448123293  | 0.708925 | 0.55428  |
| -0.230907134 | 0.942459 | 0.08664  |
| 0.312566232  | 0.882599 | 0.24167  |
| -2.787940735 | 0.87246  | -0.24434 |
| -0.379380287 | 0.973187 | 0.05371  |
| -0.472845105 | 0.997277 | 0.00451  |
| -0.663953473 | 0.931429 | -0.14004 |
| -0.569831758 | 0.93103  | 0.09917  |
| -1.540986341 | 0.9861   | -0.02377 |
| -0.204828309 | 0.901688 | -0.18813 |
| -0.516354695 | 0.890408 | -0.19726 |
| -0.347923303 | 0.84261  | -0.32016 |
| -0.342842022 | 0.917135 | -0.19293 |
| -0.150779952 | 0.878923 | -0.27854 |
| -0.892464425 | 0.646443 | -0.64978 |
| -1.262193429 | 0.714263 | -0.58917 |
| -0.289349867 | 0.841809 | 0.15113  |
| 0.257157839  | 0.942273 | -0.12796 |
| -0.431845787 | 0.918449 | 0.10602  |
| -0.990636161 | 0.976674 | -0.03808 |
| -0.267525089 | 0.967501 | -0.06075 |
| -1.924062012 | 0.865895 | -0.27389 |
| -1.190501363 | 0.842265 | 0.25773  |
| -2.01459005  | 0.760929 | -0.47864 |
| -0.751501687 | 0.829647 | -0.38995 |
| -0.755811655 | 0.758627 | 0.5389   |
| 0.995567754  | 0.743576 | 0.7857   |
| -0.760694196 | 0.82464  | -0.40825 |
| -1.165737204 | 0.688758 | -0.81155 |
| -0.863294795 | 0.895595 | -0.21752 |
| -0.303744748 | 0.946731 | -0.10963 |
| -0.097487028 | 0.999573 | -0.00086 |
| -0.416934534 | 0.920485 | -0.17087 |
| -0.331621491 | 0.953073 | 0.09351  |
| -0.474432156 | 0.940158 | -0.12167 |
| -0.183671009 | 0.91598  | 0.15026  |
| -0.644734721 | 0.974724 | 0.04155  |
| -1.115477217 | 0.820736 | -0.37851 |
| -0.847996907 | 0.862451 | -0.25697 |
| -1.753614723 | 0.886151 | -0.11664 |
| -1.568427133 | 0.831365 | -0.34076 |
| -0.416521863 | 0.974396 | 0.03951  |

|              |          |          |
|--------------|----------|----------|
| -0.255484229 | 0.962774 | 0.05102  |
| -0.99496441  | 0.918152 | -0.12828 |
| -0.08798157  | 0.911285 | 0.10072  |
| -0.939788082 | 0.784093 | -0.41831 |
| -1.052665579 | 0.818314 | -0.4097  |
| -0.438802852 | 0.960702 | -0.07547 |
| -0.540402755 | 0.945154 | -0.10083 |
| -1.551165418 | 0.826514 | 0.41329  |
| -0.759273001 | 0.842023 | -0.23984 |
| -0.591245124 | 0.920747 | -0.154   |
| -0.725454687 | 0.878257 | -0.21378 |
| 0.656855419  | 0.92013  | 0.18737  |
| 1.182857341  | 0.996543 | 0.01074  |
| -0.19882895  | 0.958936 | -0.09369 |
| -1.102569734 | 0.598199 | -0.77761 |
| 1            | 0.622002 | -0.58496 |
| -0.320994009 | 0.980054 | -0.04171 |
| 0.216908242  | 0.769793 | 0.41483  |
| -0.016429445 | 0.99056  | 0.02128  |
| -1.436168964 | 0.635611 | -0.78526 |
| -0.308373352 | 0.949113 | 0.09108  |
| -0.085622501 | 0.987658 | 0.02504  |
| -0.688459253 | 0.917215 | -0.08547 |
| 0.498965068  | 0.726219 | -0.66366 |
| -0.348159636 | 0.847201 | -0.29936 |
| -0.095809198 | 0.985643 | -0.02969 |
| -0.482308915 | 0.971185 | -0.05531 |
| 0.270089163  | 0.802013 | 0.37197  |
| -3.533102944 | 0.19012  | -2.31771 |
| -1.255257055 | 0.510282 | -1.16506 |
| -0.331676071 | 0.651372 | 0.69257  |
| 0.105847255  | 0.916133 | 0.1804   |
| -0.466029942 | 0.913283 | -0.17801 |
| -0.242788093 | 0.854902 | -0.32063 |
| -0.017565873 | 0.969463 | 0.06293  |
| -0.26093271  | 0.911262 | 0.15541  |
| -0.46571178  | 0.991427 | 0.01451  |
| -0.485287599 | 0.473856 | 0.57539  |
| -1.685825236 | 0.555528 | 0.55347  |
| -1.942433669 | 0.798304 | 0.34273  |
| -2.129177771 | 0.817279 | 0.25059  |
| -1.343301746 | 0.299863 | -0.6545  |
| -0.596575915 | 0.78517  | 0.28069  |
| -0.515746277 | 0.936931 | 0.05689  |
| -1           | 0.578633 | -1.22239 |
| 0.241831693  | 0.977538 | -0.05828 |
| -0.324085127 | 0.980084 | -0.04732 |
| -0.05770731  | 0.856287 | -0.27221 |
| -0.540568381 | 0.799387 | 0.45943  |
| -0.444981432 | 0.936508 | -0.11307 |
| -0.353967053 | 0.92328  | -0.15564 |
| -0.545787732 | 0.936872 | 0.07569  |
| -0.093326382 | 0.910495 | 0.16548  |
| -0.394312699 | 0.875981 | -0.28374 |
| -0.365744614 | 0.980953 | -0.0363  |
| -0.381194044 | 0.839627 | -0.36961 |

|              |          |          |
|--------------|----------|----------|
| -0.45593866  | 0.978739 | -0.03001 |
| -0.115784641 | 0.984421 | 0.02885  |
| -0.398694407 | 0.8664   | 0.18589  |
| -0.321928095 | 0.751907 | 0.48543  |
| -0.697185692 | 0.932919 | 0.09935  |
| -0.502883796 | 0.983374 | -0.03123 |
| -0.49649744  | 0.974782 | -0.04687 |
| -0.125644835 | 0.902088 | 0.151    |
| -1.241110915 | 0.856179 | 0.22083  |
| -0.274071491 | 0.92237  | 0.13391  |
| 0.784070698  | 0.482764 | 0.77501  |
| -0.360838452 | 0.924372 | 0.11987  |
| -0.47869402  | 0.965611 | 0.04784  |
| -0.456122141 | 0.935043 | 0.0577   |
| -0.532426722 | 0.862301 | 0.21999  |
| 0.160400009  | 0.99943  | -0.00118 |
| -0.607999201 | 0.916652 | -0.17471 |
| -0.542426328 | 0.93973  | -0.1301  |
| -1.079892801 | 0.944815 | -0.11497 |
| -0.767440553 | 0.813571 | -0.36053 |
| 0.06424946   | 0.966318 | -0.06297 |
| -0.283792966 | 0.860815 | -0.27277 |
| -0.158989524 | 0.559813 | 0.33442  |
| -0.370427106 | 0.992088 | -0.01335 |
| -0.344574501 | 0.961026 | 0.05827  |
| -0.406648553 | 0.939273 | 0.08932  |
| 0.032211921  | 0.977234 | -0.03954 |
| -0.436099115 | 0.614352 | -0.9386  |
| -0.277697514 | 0.968838 | 0.05574  |
| -0.27223015  | 0.927682 | -0.15525 |
| -0.312660344 | 0.940117 | 0.09757  |
| -0.396454828 | 0.963965 | -0.07794 |
| -0.151959188 | 0.883745 | 0.18412  |
| -0.236661694 | 0.89417  | -0.21737 |
| -0.451033119 | 0.865006 | 0.12395  |
| #DIV/0!      | 0.308068 | #DIV/0!  |
| 0.127723666  | 0.863947 | 0.2339   |
| -0.43248647  | 0.678384 | 0.57579  |
| -1.374395515 | 0.799155 | -0.3744  |
| 0.384143491  | 0.676288 | 0.59891  |
| -0.05293416  | 0.622761 | 0.41818  |
| -0.306141187 | 0.942143 | 0.08512  |
| -0.276267131 | 0.759435 | 0.28482  |
| -0.428591304 | 0.795198 | 0.13002  |
| -0.092422947 | 0.975615 | -0.05203 |
| -0.218482055 | 0.943876 | -0.11194 |
| -0.400269077 | 0.705354 | 0.20798  |
| -0.53776148  | 0.888688 | 0.14389  |
| -0.417915695 | 0.987577 | 0.02416  |
| -0.33467228  | 0.968539 | 0.06507  |
| -0.553223806 | 0.93197  | -0.1029  |
| -0.147351962 | 0.888437 | 0.14062  |
| -0.566038373 | 0.878898 | 0.09786  |
| -0.084229606 | 0.983173 | -0.0315  |
| -0.144622303 | 0.622378 | 0.47605  |
| -0.537473575 | 0.970726 | 0.05571  |

|              |          |          |
|--------------|----------|----------|
| -0.415037499 | 0.680109 | 0.58496  |
| -0.90241964  | 0.497934 | 0.61823  |
| -1.026472211 | 0.963098 | -0.06711 |
| 0.709920771  | 0.725075 | -1.04182 |
| -0.062413933 | 0.945944 | -0.10716 |
| -0.476276249 | 0.939671 | -0.11351 |
| -0.427561445 | 0.938469 | -0.12479 |
| -1.401582775 | 0.851458 | 0.30996  |
| -0.133453445 | 0.867628 | -0.30895 |
| 0.098991064  | 0.975857 | -0.06454 |
| -0.359961522 | 0.868435 | -0.2832  |
| -0.565317006 | 0.663664 | 0.67848  |
| -0.736965594 | 0.832739 | -0.39593 |
| -0.209580643 | 0.980921 | 0.0364   |
| -0.16460313  | 0.950473 | -0.09864 |
| -0.349521464 | 0.964423 | -0.06081 |
| -2.640988415 | 0.983068 | 0.02762  |
| -0.899071091 | 0.842713 | 0.26651  |
| 0.874469118  | 0.680712 | 0.87447  |
| 0            | 0.450185 | #NUM!    |
| -0.326810316 | 0.919792 | -0.16506 |
| -0.76156126  | 0.996735 | -0.00643 |
| -0.399015482 | 0.691782 | 0.27398  |
| 0            | 0.531689 | -1.50901 |
| -0.379276646 | 0.878933 | 0.24147  |
| -1.27694064  | 0.863084 | 0.26086  |
| -0.136112527 | 0.690074 | 0.51039  |
| -0.627487275 | 0.893624 | -0.15135 |
| -1.127755547 | 0.930726 | 0.11736  |
| -0.284143432 | 0.732002 | 0.441    |
| -0.402004935 | 0.88667  | -0.26749 |
| -0.319235457 | 0.915401 | -0.20055 |
| -0.529504173 | 0.936815 | -0.13193 |
| -0.588102208 | 0.958495 | 0.09061  |
| 1.014743344  | 0.678036 | 0.77824  |
| -0.110558375 | 0.703412 | 0.28358  |
| 0.711763009  | 0.962817 | 0.10791  |
| -1.458722503 | 0.500343 | -1.41646 |
| -1.584962501 | 0.562529 | 0.87447  |
| -1.904586936 | 0.656623 | -0.58517 |
| -0.460827799 | 0.868882 | -0.29886 |
| -1.485426827 | 0.869939 | 0.19265  |
| -0.372548668 | 0.9585   | 0.04428  |
| -1.245537758 | 0.81346  | 0.34345  |
| -2.294542207 | 0.882884 | 0.2123   |
| -0.781050421 | 0.961581 | -0.07551 |
| -0.5334322   | 0.880722 | -0.15409 |
| -0.68589141  | 0.840249 | -0.35147 |
| -0.891688189 | 0.967467 | -0.07014 |
| -0.214301834 | 0.942167 | -0.10555 |
| -0.465197254 | 0.981235 | 0.0377   |
| 0.031593125  | 0.677956 | 0.56171  |
| -1.342887714 | 0.924128 | -0.15355 |
| 0.267933205  | 0.700154 | 0.66141  |
| -1.427219988 | 0.802233 | 0.33814  |
| 0.859039077  | 0.57876  | 0.82045  |

|              |          |          |
|--------------|----------|----------|
| -0.144483887 | 0.933351 | -0.15837 |
| 0.379566884  | 0.927689 | 0.1635   |
| 0.423211431  | 0.880417 | 0.24101  |
| -0.169101028 | 1        | 0        |
| -0.938599455 | 1        | 0        |
| -0.401792993 | 0.94752  | -0.12191 |
| -0.960661852 | 0.878063 | -0.22552 |
| #DIV/0!      | ?        | #DIV/0!  |
| -0.318471353 | 0.903015 | 0.15606  |
| -0.22649099  | 0.978583 | -0.04453 |
| -0.573466862 | 0.979374 | -0.04494 |
| -2.00877021  | 0.493865 | 0.59689  |
| -0.483544209 | 0.88992  | -0.21011 |
| -0.657112286 | 0.946529 | -0.1083  |
| -0.347110276 | 0.924764 | -0.13154 |
| 0.296393003  | 0.854246 | 0.29381  |
| -1           | 1        | 0        |
| 0.662965013  | 0.13085  | 1.8413   |
| -0.206450877 | 0.95952  | 0.09311  |
| 0.024056612  | 0.870015 | 0.15873  |
| -0.395680556 | 0.992176 | 0.01362  |
| -0.808359934 | 0.939626 | -0.09982 |
| -0.532557139 | 0.889844 | 0.14286  |
| -0.470203985 | 0.98645  | -0.02513 |
| -0.452944516 | 0.92871  | 0.07617  |
| -0.554477926 | 0.968702 | -0.04092 |
| -0.270402035 | 0.561202 | 0.39948  |
| -0.47112119  | 0.855847 | 0.16905  |
| -0.387475421 | 0.910428 | 0.1314   |
| -0.297191417 | 0.992601 | 0.01315  |
| -0.032968851 | 0.997683 | 0.00527  |
| -0.502957758 | 0.927873 | -0.14645 |
| -0.300508923 | 0.755869 | 0.35151  |
| -0.465617773 | 0.940013 | -0.11305 |
| -0.844129089 | 0.716476 | -0.61926 |
| -0.480147596 | 0.945689 | -0.09566 |
| -0.381568512 | 0.968439 | -0.06371 |
| -0.441254909 | 0.885638 | 0.14273  |
| -0.327289287 | 0.929068 | -0.12795 |
| -0.576869486 | 0.870321 | -0.11317 |
| -2.956931278 | 0.765078 | -0.41504 |
| -0.688055994 | 0.518461 | -0.68806 |
| -2.344640223 | 0.883648 | 0.09683  |
| -1.084888898 | 0.892402 | -0.152   |
| -0.678071905 | 0.559404 | -0.41504 |
| -0.835517818 | 0.775462 | -0.35594 |
| -0.031402099 | 0.941966 | 0.10642  |
| -0.006619384 | 0.979196 | -0.04935 |
| -0.461179281 | 0.941705 | 0.12876  |
| 0.027817944  | 0.999393 | 0.00128  |
| -0.518867148 | 0.92842  | -0.16113 |
| -0.478440777 | 0.905337 | 0.17503  |
| -0.261441148 | 0.841332 | 0.11486  |
| -0.147557188 | 0.680544 | 0.08746  |
| 0.061639066  | 0.707161 | 0.27822  |
| 0            | 0.849838 | 0.24511  |

|              |          |          |
|--------------|----------|----------|
| -0.38359802  | 0.990013 | 0.01837  |
| -0.268178855 | 0.933082 | -0.14595 |
| -0.35590254  | 0.987421 | -0.02021 |
| -0.394127086 | 0.91678  | 0.12294  |
| -0.512233034 | 0.992629 | 0.01251  |
| -0.106016888 | 0.835199 | 0.32543  |
| -1.321928095 | 0.894466 | -0.18442 |
| -1.584962501 | 0.825659 | 0.22239  |
| 0            | 0.99649  | 0.0063   |
| -3.268488836 | 0.132808 | -2.558   |
| -0.307200809 | 0.952834 | 0.06566  |
| -0.725890821 | 0.948569 | 0.05125  |
| -0.387221101 | 0.932791 | 0.10177  |
| -0.315303203 | 0.786847 | 0.23014  |
| -0.257003853 | 0.972688 | -0.05516 |
| -0.556554722 | 0.957032 | 0.05824  |
| -0.545062564 | 0.914364 | -0.16209 |
| -0.545692383 | 0.918992 | -0.16873 |
| -0.278081532 | 0.948673 | -0.1099  |
| -0.163702821 | 0.986588 | -0.02343 |
| -0.400190495 | 0.958522 | 0.0812   |
| -0.394925036 | 0.948173 | 0.08172  |
| -0.078110827 | 0.882343 | 0.22351  |
| -0.114318333 | 0.878079 | 0.24272  |
| -0.487018824 | 0.895708 | -0.20477 |
| -0.348042811 | 0.992243 | -0.0142  |
| -0.346068542 | 0.981559 | -0.03344 |
| -0.457829988 | 0.83371  | -0.39018 |
| -0.806053438 | 0.923997 | 0.15037  |
| -0.247638772 | 0.858024 | -0.32946 |
| -0.447667256 | 0.885901 | -0.24811 |
| -0.299893583 | 0.876133 | 0.16365  |
| 0.000818086  | 0.995278 | 0.00979  |
| -0.27860632  | 0.871143 | -0.29963 |
| -0.699833979 | 0.92295  | 0.1564   |
| -0.608560376 | 0.888856 | 0.21884  |
| -0.654515131 | 0.937505 | 0.06243  |
| -0.873307995 | 0.868328 | 0.1847   |
| -0.932392692 | 0.867702 | -0.11415 |
| -0.515643199 | 0.982429 | 0.02411  |
| -0.546663641 | 0.96245  | -0.06603 |
| -0.439740753 | 0.933883 | 0.10538  |
| -0.004293738 | 0.960223 | 0.09438  |
| -0.343750415 | 0.976645 | -0.04489 |
| -0.00754493  | 0.973598 | -0.05701 |
| -0.45649822  | 0.902824 | -0.20102 |
| -0.172551819 | 0.948717 | -0.11312 |
| -0.536705947 | 0.948248 | 0.06949  |
| -0.408656309 | 0.961828 | 0.05096  |
| -0.316704088 | 0.958496 | 0.07313  |
| #NUM!        | 0.710482 | -0.32193 |
| -1.169925001 | 0.634501 | -1       |
| -0.732046294 | 0.949806 | -0.07149 |
| 0.556393349  | 0.946709 | 0.16046  |
| 1.381870635  | 0.844181 | 0.59946  |
| -0.099157258 | 0.894881 | 0.23397  |

|              |          |          |
|--------------|----------|----------|
| 0.652076697  | 1        | 0        |
| -1.345693561 | 0.619429 | -0.76035 |
| -0.335603032 | 0.73608  | 0.57586  |
| -2.263034406 | 0.501361 | -1.26303 |
| 0.310133905  | 0.777475 | -0.61042 |
| -1.64385619  | 0.664291 | -0.8365  |
| #NUM!        | 0.622002 | -1       |
| -0.415037499 | 0.572672 | -1       |
| 0.828851857  | 0.704479 | 0.76121  |
| -0.139953426 | 0.953398 | 0.07096  |
| -0.359092998 | 0.890353 | 0.13778  |
| -0.13236022  | 0.916375 | 0.14684  |
| -0.8757327   | 0.980366 | -0.0287  |
| -0.458066077 | 0.963102 | 0.05842  |
| -0.564773014 | 0.986694 | 0.02321  |
| -0.43870383  | 0.976929 | -0.04459 |
| -0.752072487 | 0.608771 | -0.80122 |
| -0.755562172 | 0.783327 | -0.43105 |
| -0.371865414 | 0.951499 | -0.10811 |
| -1.2410081   | 0.312117 | 1.2303   |
| -0.421015016 | 0.975404 | 0.03477  |
| -0.363817868 | 0.940746 | -0.12308 |
| -0.693896872 | 0.76785  | 0.19592  |
| 0.603913968  | 0.850076 | 0.37675  |
| 0.039348667  | 0.870517 | 0.26082  |
| 0.154275412  | 0.816796 | 0.32665  |
| -0.506312729 | 0.826479 | 0.21408  |
| -0.721726615 | 0.957782 | -0.079   |
| -0.618370738 | 0.94459  | 0.0733   |
| -0.05246742  | 0.862475 | -0.3155  |
| -0.270323061 | 0.988075 | -0.02521 |
| -0.165963646 | 0.969275 | -0.06032 |
| -0.462180483 | 0.811202 | 0.35141  |
| -0.760329587 | 0.854474 | -0.26651 |
| 0.128324097  | 0.618653 | 0.38538  |
| 0.090492767  | 0.909784 | 0.1771   |
| -0.11885298  | 0.987868 | 0.0214   |
| 0.037053595  | 0.965004 | 0.06834  |
| -0.398303738 | 0.99401  | 0.00924  |
| -1.505945995 | 0.448412 | -1.13558 |
| -0.367731785 | 0.85863  | -0.32193 |
| -0.283389496 | 0.995462 | -0.00724 |
| -0.455229287 | 0.885599 | 0.13268  |
| 0.775293713  | 0.964717 | -0.08573 |
| -0.906890596 | 0.572746 | -1.32193 |
| -0.400777401 | 0.978022 | -0.04084 |
| -0.263034406 | 0.814783 | 0.35364  |
| -0.028517812 | 0.947522 | 0.1135   |
| -0.173064709 | 0.812135 | -0.41923 |
| -0.637429921 | 0.799525 | -0.22239 |
| -1.573864792 | 0.691047 | 0.47103  |
| -0.294880039 | 0.855973 | -0.34688 |
| -0.014081756 | 0.889115 | 0.19144  |
| -0.086626354 | 0.921793 | -0.1408  |
| -0.161463423 | 0.923845 | -0.15515 |
| -0.340402507 | 0.97144  | 0.05862  |

|              |          |          |
|--------------|----------|----------|
| -0.190482297 | 0.978594 | -0.04358 |
| 0.257157839  | 0.93252  | 0.16077  |
| #NUM!        | 0.622002 | -1       |
| 0.142712502  | 0.783191 | 0.44895  |
| 3.557128293  | 0.350229 | 2.92697  |
| -0.259673034 | 0.986086 | 0.0286   |
| -0.46712601  | 0.853905 | -0.3322  |
| 0.174716421  | 0.855    | -0.33931 |
| -1.252387162 | 0.642587 | -0.48187 |
| 1.584962501  | 0.651448 | 1        |
| 0.028758993  | 0.721648 | 0.31221  |
| -0.847996907 | 0.749249 | 0.41504  |
| -0.334752135 | 0.980081 | 0.03697  |
| #NUM!        | 0.308068 | #NUM!    |
| -0.618909833 | 0.898375 | 0.12063  |
| -3.169925001 | 0.034897 | -1       |
| -0.385306681 | 0.928623 | -0.12851 |
| -0.485571248 | 0.954797 | -0.07256 |
| -0.846072296 | 0.665097 | -0.3469  |
| 0.521702582  | 0.888174 | 0.23053  |
| -0.935575502 | 0.745    | -0.29451 |
| 0.734127039  | 0.531735 | 0.69306  |
| -0.408280133 | 0.895027 | -0.23566 |
| -0.480283524 | 0.857214 | -0.3487  |
| -0.469581788 | 0.872345 | -0.29244 |
| 0.008035427  | 0.879547 | 0.27456  |
| -0.399465823 | 0.934235 | -0.12199 |
| -0.463550077 | 0.996101 | 0.0082   |
| -0.162271429 | 0.85583  | -0.38466 |
| -0.399470344 | 0.991785 | 0.01739  |
| -0.493981538 | 0.862533 | 0.1362   |
| -0.251257238 | 0.974128 | 0.04081  |
| 0.17290886   | 0.947988 | 0.11203  |
| -0.472671327 | 0.890005 | 0.12407  |
| -2.063553698 | 0.867428 | -0.20119 |
| 1.415037499  | 0.73554  | -2.58496 |
| 0.11042399   | 0.929697 | 0.14048  |
| #DIV/0!      | ?        | #DIV/0!  |
| -1           | 0.651448 | -1       |
| -0.175258446 | 0.974618 | 0.03679  |
| -0.376457276 | 0.948096 | -0.10664 |
| -0.240169551 | 0.926776 | 0.15498  |
| -1.045801363 | 0.898446 | -0.20558 |
| -0.232438307 | 0.956992 | 0.07055  |
| -0.451937082 | 0.835863 | -0.37197 |
| 0.010372927  | 0.907609 | 0.17002  |
| -3.321928095 | 0.587095 | -1       |
| -1           | 1        | 0        |
| -0.68388415  | 0.933046 | -0.06976 |
| -0.37970996  | 0.987339 | 0.02031  |
| -0.175258446 | 0.961341 | -0.08215 |
| -1.196892049 | 0.664504 | -0.58496 |
| -0.332622856 | 0.979407 | 0.04245  |
| -0.281631625 | 0.994258 | -0.00891 |
| -0.517058436 | 0.585627 | 0.63619  |
| 0.42136119   | 0.815795 | 0.41935  |



|              |          |          |
|--------------|----------|----------|
| -0.220599458 | 0.947103 | 0.09797  |
| -0.416451675 | 0.952946 | -0.08941 |
| -0.199818407 | 0.924379 | -0.14965 |
| -0.747554874 | 0.887689 | -0.23349 |
| 0.172488882  | 0.951586 | -0.12204 |
| -0.182453676 | 0.951895 | 0.10459  |
| -0.084692866 | 0.99031  | 0.017    |
| -0.546292759 | 0.923937 | 0.12237  |
| -1.223774975 | 0.544072 | -0.59119 |
| -0.090765464 | 0.962412 | -0.09077 |
| -2.64385619  | 0.324668 | -1.47393 |
| 0            | 0.926399 | 0.17688  |
| -0.511192295 | 0.944125 | -0.10722 |
| -0.487251899 | 0.999444 | -0.00091 |
| #NUM!        | 0.756486 | -0.58496 |
| -0.254942993 | 0.946036 | 0.07587  |
| -0.242139588 | 0.963059 | -0.07829 |
| -0.363436303 | 0.965266 | 0.05938  |
| -0.56791023  | 0.900113 | 0.14095  |
| -0.251052383 | 0.794127 | 0.30893  |
| -0.506531546 | 0.989548 | -0.01802 |
| -0.327481506 | 0.910341 | -0.18205 |
| -1.430709657 | 0.804018 | -0.29703 |
| -1.589336298 | 0.634758 | -0.74993 |
| 0.642947001  | 0.95952  | 0.10957  |
| -0.47882589  | 0.92838  | -0.13104 |
| -1           | 0.651448 | 0.58496  |
| -0.262103935 | 0.994429 | -0.00856 |
| -0.429302329 | 0.951427 | -0.10343 |
| -0.150127271 | 0.976154 | 0.03735  |
| -0.513577867 | 0.989523 | -0.01205 |
| -0.221278371 | 0.961215 | -0.08332 |
| -0.613410423 | 0.984898 | 0.01889  |
| -0.69363439  | 0.745463 | 0.18958  |
| -0.476664885 | 0.993177 | 0.01024  |
| -0.42278125  | 0.761583 | 0.31024  |
| -0.461133914 | 0.99584  | -0.00511 |
| -0.156010875 | 0.867962 | 0.21452  |
| -0.456181431 | 0.98415  | -0.02766 |
| 0.624962823  | 0.968542 | 0.08439  |
| -0.893084796 | 0.770719 | 0.20645  |
| -1.136136688 | 0.764375 | -0.55318 |
| 1.332434361  | 0.799974 | 0.70498  |
| -1.82339569  | 0.954606 | -0.09035 |
| -0.889396805 | 0.94866  | 0.09928  |
| -0.754819606 | 0.921949 | -0.09659 |
| 0.018725508  | 0.901484 | 0.16649  |
| -0.551479515 | 0.938396 | 0.07107  |
| -0.091449446 | 0.804355 | 0.30398  |
| -0.815350367 | 0.930427 | 0.09596  |
| -0.344711432 | 0.931972 | 0.10366  |
| -0.288936471 | 0.986259 | 0.02125  |
| -0.583219434 | 0.946227 | 0.11037  |
| -0.26598613  | 0.941671 | -0.12687 |
| 0.277907682  | 0.826356 | 0.35883  |
| -1.170470135 | 0.833844 | -0.33741 |

|              |          |          |
|--------------|----------|----------|
| 1.321928095  | 0.825659 | 0.58496  |
| -0.298720704 | 0.921625 | 0.13963  |
| -0.275901644 | 0.650862 | 0.44138  |
| -0.690671942 | 0.879322 | -0.18371 |
| -1.016843688 | 0.849763 | -0.07729 |
| -0.45681237  | 0.944341 | 0.0802   |
| -0.657294406 | 0.985726 | -0.0138  |
| -0.781117563 | 0.971839 | -0.03618 |
| -0.428863919 | 0.917836 | 0.11634  |
| -0.65858266  | 0.942163 | 0.05591  |
| -1.553286024 | 0.707411 | -0.4902  |
| -1.766441117 | 0.424584 | -0.95819 |
| 0            | 1        | 0        |
| -1.000006742 | 0.693277 | -0.44685 |
| -0.537434131 | 0.831887 | -0.29585 |
| -0.242834219 | 0.918036 | 0.12614  |
| -0.482870934 | 0.896672 | 0.125    |
| -0.417243118 | 0.953307 | 0.07096  |
| -0.30587593  | 0.89974  | -0.21282 |
| -0.467539337 | 0.86778  | -0.28493 |
| -0.136483262 | 0.933064 | 0.12243  |
| 0.097163665  | 0.805292 | 0.31901  |
| -0.702319451 | 0.913769 | -0.10846 |
| -0.515588798 | 0.911894 | 0.11037  |
| -0.357932204 | 0.875457 | 0.13075  |
| -0.508146904 | 0.976021 | -0.03191 |
| -0.491789857 | 0.932908 | -0.13015 |
| -0.542382924 | 0.8377   | 0.30829  |
| 0.021695071  | 0.976582 | -0.05193 |
| -0.264809303 | 0.993944 | 0.01275  |
| -1.562098392 | 0.702859 | -0.67163 |
| -0.631206367 | 0.885627 | -0.21022 |
| -0.888489517 | 0.877335 | -0.26055 |
| -1.280107919 | 0.674508 | -0.76553 |
| -0.517135687 | 0.918423 | 0.14684  |
| -1.275724271 | 0.765632 | -0.46657 |
| -1.4639471   | 0.601176 | -0.89566 |
| -0.254317189 | 0.949805 | 0.09856  |
| -0.806894298 | 0.75324  | -0.39153 |
| 0.263034406  | 0.686187 | -1       |
| -2.676705069 | 0.261232 | -3.47317 |
| -2.814444347 | 0.155206 | -1.89107 |
| -0.604515298 | 0.939835 | -0.10201 |
| -0.640069802 | 0.881796 | -0.08076 |
| -0.346754411 | 0.77404  | 0.27338  |
| 0.30954437   | 0.842325 | -0.33121 |
| -0.856846227 | 0.707917 | -0.56052 |
| -0.665580961 | 0.874524 | -0.23816 |
| -2.258152184 | 0.677821 | -0.46761 |
| 0.797600355  | 0.63385  | 0.74781  |
| 0.145850866  | 0.953275 | 0.10124  |
| #DIV/0!      | ?        | #DIV/0!  |
| -0.083372568 | 0.934863 | 0.11215  |
| -0.168660011 | 0.970658 | -0.05528 |
| -0.370661588 | 0.974966 | -0.05075 |
| -0.101767995 | 0.9464   | 0.0768   |

|              |          |          |
|--------------|----------|----------|
| -0.348125031 | 0.791526 | 0.11878  |
| -0.943416472 | 0.649824 | -0.78588 |
| -6.50779464  | 0.26288  | -4.18587 |
| 0.257275137  | 0.949619 | 0.12649  |
| 0.294447358  | 0.877886 | -0.30166 |
| -0.183316512 | 0.933186 | 0.13433  |
| 0.03873632   | 0.910933 | -0.18621 |
| -0.796856357 | 0.915185 | -0.1658  |
| -0.271693323 | 0.753469 | 0.38293  |
| 0.733719935  | 0.977531 | -0.06634 |
| -0.452243057 | 0.899222 | 0.06944  |
| -0.190008673 | 0.982475 | -0.03628 |
| -0.174250927 | 0.913939 | 0.17088  |
| -0.58739621  | 0.949247 | 0.0764   |
| -0.583803244 | 0.99951  | -0.0007  |
| -0.302624013 | 0.976062 | 0.04042  |
| -0.325635281 | 0.976561 | 0.03574  |
| -0.296959766 | 0.926756 | 0.10955  |
| -0.428696253 | 0.902119 | -0.16959 |
| -0.534014989 | 0.943369 | 0.09907  |
| -1.22989273  | 0.948232 | 0.08787  |
| -0.831758118 | 0.653017 | 0.52232  |
| 0.17118665   | 0.957232 | 0.05571  |
| -0.21285095  | 0.998913 | 0.00224  |
| -0.331738214 | 0.944612 | -0.10781 |
| 0.150189523  | 0.769304 | 0.35395  |
| -0.702878764 | 0.852758 | 0.23731  |
| -0.389309927 | 0.733225 | 0.23438  |
| -0.482611812 | 0.865625 | 0.1512   |
| -3.584962501 | 0.475411 | -1.58496 |
| -0.562332165 | 0.95167  | 0.06732  |
| -1.11990479  | 0.684448 | -0.53149 |
| 0.433896527  | 0.988769 | 0.02509  |
| -0.735564239 | 0.958019 | -0.04269 |
| -0.411921045 | 0.952821 | 0.0679   |
| -0.542199322 | 0.939938 | -0.10456 |
| -1.049313176 | 0.515475 | -0.89679 |
| -0.352143563 | 0.749302 | -0.49084 |
| -0.765534746 | 0.46771  | 0.77052  |
| -0.409394287 | 0.929732 | 0.10398  |
| -0.97883539  | 0.902004 | -0.10055 |
| -0.568607888 | 0.821756 | -0.26613 |
| -0.306872493 | 0.951572 | -0.08431 |
| -0.57562282  | 0.910476 | -0.20084 |
| -0.824414534 | 0.646289 | -0.91098 |
| -1.984762075 | 0.510968 | -1.17042 |
| -0.620251251 | 0.56404  | -1.2481  |
| -2.085464411 | 0.978098 | 0.03749  |
| -0.201950624 | 0.9576   | 0.06805  |
| -0.570953552 | 0.817009 | -0.33075 |
| -0.200499815 | 0.606854 | 0.32382  |
| -0.353636955 | 0.949939 | -0.0973  |
| -0.894621758 | 0.696787 | -0.1525  |
| -0.283792966 | 0.908428 | -0.20002 |
| -0.699667053 | 0.838472 | 0.21057  |
| -0.308047106 | 0.992651 | -0.0111  |

|              |          |          |
|--------------|----------|----------|
| -1.064955442 | 0.674487 | -0.43024 |
| -0.572023445 | 0.998883 | -0.00216 |
| -1.075217386 | 0.898434 | 0.21492  |
| -1.36923381  | 0.171387 | -1.36923 |
| -1.874469118 | 0.466905 | -1.87447 |
| -0.654225163 | 0.873945 | -0.29494 |
| -1.544573377 | 0.848901 | 0.21261  |
| 0.261610928  | 0.980932 | -0.0492  |
| -0.813466196 | 0.831166 | 0.06521  |
| -0.587329515 | 0.845908 | -0.3338  |
| -0.436306116 | 0.92435  | -0.15299 |
| -0.51583814  | 0.993743 | 0.00882  |
| -1.427421224 | 0.861317 | 0.2171   |
| 0.708739041  | 0.83681  | 0.3147   |
| 0.292282633  | 0.832502 | 0.40738  |
| 0.275634443  | 0.908324 | -0.24793 |
| -0.270137255 | 0.995029 | 0.00924  |
| -0.358526649 | 0.995964 | 0.00566  |
| -1.657531127 | 0.797245 | 0.4619   |
| -0.02181811  | 0.768563 | 0.24921  |
| -0.235140009 | 0.930099 | 0.11756  |
| -0.321536537 | 0.997784 | 0.00469  |
| #DIV/0!      | ?        | #DIV/0!  |
| -0.584699542 | 0.929309 | 0.08249  |
| 1.453640339  | 0.620933 | 1.14416  |
| -0.562177813 | 0.874806 | -0.25562 |
| -0.481131614 | 0.993965 | -0.00996 |
| -0.502619027 | 0.974488 | -0.0441  |
| -0.766782213 | 0.964843 | -0.05335 |
| -0.453172628 | 0.948912 | -0.0906  |
| -0.26177023  | 0.941097 | 0.09863  |
| -0.271986007 | 0.986091 | 0.02458  |
| -0.074510278 | 0.978095 | -0.04424 |
| -0.825915633 | 0.816006 | -0.37567 |
| -0.736965594 | 0.639775 | 0.7137   |
| -0.509420164 | 0.971581 | 0.04563  |
| -0.643411531 | 0.785557 | 0.08966  |
| -0.424366068 | 0.998351 | -0.00355 |
| -0.445640483 | 0.804365 | -0.41452 |
| -0.792767386 | 0.963567 | 0.05749  |
| 0.302623034  | 0.982844 | -0.03613 |
| -0.549604965 | 0.922726 | -0.16432 |
| -0.540411194 | 0.790795 | 0.18071  |
| -0.963658153 | 0.832679 | -0.21811 |
| -0.220102569 | 0.995868 | -0.00742 |
| #NUM!        | 0.308068 | #NUM!    |
| -0.405147377 | 0.935058 | -0.12319 |
| -1.003602237 | 0.926359 | -0.1239  |
| 1            | 0.710482 | 1        |
| -0.499116852 | 0.917311 | 0.1206   |
| 0.280107919  | 0.711412 | -0.48543 |
| -0.940150145 | 0.614209 | -0.374   |
| -0.6395223   | 0.986235 | -0.02531 |
| -0.229040797 | 0.915737 | 0.13492  |
| -0.171125829 | 0.980123 | -0.04266 |
| -0.478769161 | 0.940651 | -0.08169 |

|              |          |          |
|--------------|----------|----------|
| -0.080831075 | 0.964581 | 0.04551  |
| -0.157464265 | 0.985008 | -0.03035 |
| -0.354028938 | 0.926078 | -0.11181 |
| -0.339575961 | 0.92501  | -0.08582 |
| -1.459431619 | 0.501725 | -1.1375  |
| -0.42107334  | 0.913334 | -0.15947 |
| -0.06342538  | 0.795829 | -0.60842 |
| -0.53011771  | 0.9041   | -0.17338 |
| -0.785811498 | 0.859689 | 0.1689   |
| -1.415037499 | 0.824424 | -0.30968 |
| -0.077644721 | 0.840226 | 0.30631  |
| 0.104902183  | 0.85341  | 0.24867  |
| -0.408423914 | 0.919951 | -0.14224 |
| -0.469341586 | 0.995165 | 0.00755  |
| -0.276648615 | 0.943814 | 0.06938  |
| -0.511812193 | 0.97145  | 0.05069  |
| -0.559196164 | 0.902333 | -0.16919 |
| -2.548972644 | 0.341672 | -2.11834 |
| -0.689659879 | 0.871421 | -0.18442 |
| -0.137147566 | 0.919477 | 0.13418  |
| -0.609830593 | 0.866955 | -0.22159 |
| -0.440877504 | 0.928754 | 0.11876  |
| -0.302038793 | 0.714669 | 0.21424  |
| -0.284074275 | 0.889037 | 0.16653  |
| -0.371792721 | 0.971817 | 0.0384   |
| -0.508611615 | 0.865297 | -0.23816 |
| -0.755066284 | 0.964833 | 0.04086  |
| -0.847996907 | 0.898009 | 0.14466  |
| -0.0489096   | 0.921521 | 0.17206  |
| -0.368053117 | 0.976535 | 0.04178  |
| -0.277238311 | 0.909437 | -0.13619 |
| -1.004676487 | 0.846788 | 0.21235  |
| -0.062480997 | 0.998074 | -0.00383 |
| 1.078501974  | 0.217445 | 1.27955  |
| -0.129722735 | 0.950161 | -0.10613 |
| 0.126345734  | 0.987864 | -0.02466 |
| -0.432616478 | 0.961458 | 0.0785   |
| -0.061534678 | 0.90165  | 0.19469  |
| -0.47126371  | 0.978926 | 0.03199  |
| -0.470760792 | 0.965741 | -0.05847 |
| -0.323074979 | 0.954619 | 0.07032  |
| 0.075767508  | 0.995312 | 0.01107  |
| -0.402804876 | 0.9425   | -0.11503 |
| -0.524094336 | 0.976014 | 0.03865  |
| -0.758504709 | 0.868724 | -0.21476 |
| -1           | 0.978283 | 0.04182  |
| -1.584962501 | 0.60813  | -1       |
| -2.067590695 | 0.936469 | -0.10512 |
| -0.103139007 | 0.920274 | 0.12809  |
| 0.022026306  | 0.833567 | 0.30556  |
| -2           | 0.844837 | -0.19265 |
| 0.265053573  | 0.77674  | 0.47587  |
| -0.768184325 | 0.99792  | 0.00441  |
| -0.113943887 | 0.991658 | 0.01563  |
| -0.678071905 | 0.670622 | 0.70044  |
| -0.155097584 | 0.970935 | -0.06319 |

|              |          |          |
|--------------|----------|----------|
| -1.346557761 | 0.811874 | 0.36048  |
| #NUM!        | 0.495025 | -1.58496 |
| 0.30721493   | 0.763683 | 0.40627  |
| -1.931382796 | 0.748583 | 0.14896  |
| -0.354463979 | 0.934321 | -0.08473 |
| -0.469225756 | 0.978144 | 0.02058  |
| -0.318438171 | 0.996856 | 0.00581  |
| #NUM!        | 0.737346 | -0.63743 |
| 0.321928095  | 0.230584 | -2       |
| -0.501887471 | 0.885135 | -0.20482 |
| -0.735149741 | 0.857539 | 0.21563  |
| -1.080338407 | 0.911771 | -0.17772 |
| -0.706857152 | 0.802054 | -0.37977 |
| -1.350497247 | 0.745521 | -0.38702 |
| -0.357749609 | 0.941484 | -0.1046  |
| #DIV/0!      | 0.353387 | #DIV/0!  |
| -0.291231298 | 0.972163 | 0.03911  |
| 0.176525413  | 0.930154 | 0.152    |
| -6.721099189 | 0.217509 | -4.26167 |
| -0.097847323 | 0.820706 | 0.17779  |
| 1.378511623  | 0.733696 | 1        |
| -1.930048317 | 0.84464  | 0.26282  |
| 0.441982648  | 0.487028 | 1.05605  |
| -1.689831619 | 0.515319 | 0.62175  |
| 0.127445989  | 0.980624 | -0.04744 |
| -0.67560318  | 0.905284 | 0.20205  |
| -0.362117185 | 0.89577  | -0.2261  |
| -0.354885933 | 0.831096 | -0.37986 |
| 0.777607579  | 0.66209  | 0.92057  |
| -0.568453414 | 0.99356  | 0.00638  |
| -0.121053935 | 0.933477 | 0.12021  |
| -0.320112242 | 0.990835 | -0.01645 |
| -0.913126696 | 0.786136 | -0.45887 |
| -0.440988247 | 0.86174  | -0.28398 |
| -0.698997744 | 0.825487 | -0.38082 |
| -0.24525653  | 0.919928 | 0.15472  |
| -0.925999419 | 0.742786 | -0.39782 |
| 0.005053228  | 0.830336 | 0.28397  |
| -0.555977293 | 0.869728 | -0.17884 |
| -1.188445089 | 0.989981 | -0.0148  |
| 0.556703838  | 0.822489 | 0.45457  |
| 0.730394944  | 0.88064  | 0.24314  |
| 1.584962501  | 0.832498 | 0.67807  |
| -1           | 1        | 0        |
| 0.169925001  | 0.572485 | -1.41504 |
| 0.025295785  | 0.910003 | 0.17777  |
| -0.267506718 | 0.946461 | -0.09813 |
| 0.050040682  | 0.966372 | 0.06634  |
| -0.901468537 | 0.946649 | -0.10225 |
| -0.263034406 | 0.823206 | -0.38333 |
| #NUM!        | 0.308068 | #NUM!    |
| -0.306661338 | 0.973372 | 0.06012  |
| 0.086357261  | 0.886141 | 0.20262  |
| -0.97035699  | 0.623775 | -0.64653 |
| -0.289506617 | 0.91167  | 0.18442  |
| -1.392317423 | 0.76082  | 0.36257  |

|              |          |          |
|--------------|----------|----------|
| -1.459431619 | 0.876527 | 0.24101  |
| -3           | 0.823154 | -0.41504 |
| #NUM!        | 0.588437 | -1       |
| -0.796667037 | 0.954583 | -0.08871 |
| -0.95749776  | 0.896174 | -0.19646 |
| -0.212629452 | 0.968316 | -0.06001 |
| 1.584962501  | 0.724378 | #NUM!    |
| -0.380242511 | 0.966738 | -0.07371 |
| -0.319126329 | 0.978139 | -0.04587 |
| 0.213657611  | 0.701083 | -0.56478 |
| -0.540568381 | 0.893828 | -0.24511 |
| 0.428289906  | 0.486555 | 0.62004  |
| 0.981429964  | 0.385515 | 0.80727  |
| 0.387023123  | 0.722335 | 0.26534  |
| -0.619727919 | 0.769854 | 0.43211  |
| 3.415037499  | 0.521191 | 2.02975  |
| -1.966833136 | 0.54616  | -1       |
| -0.47784165  | 0.908551 | -0.20212 |
| -0.529239656 | 0.988549 | -0.01868 |
| -1.321928095 | 0.685985 | -0.60768 |
| -0.271538846 | 0.972678 | 0.05199  |
| -0.368969498 | 0.924061 | -0.17451 |
| -0.339685728 | 0.930926 | -0.17011 |
| -0.662068958 | 0.906745 | -0.2118  |
| -0.038677344 | 0.907238 | 0.21003  |
| -0.164781698 | 0.914275 | -0.19592 |
| -0.567433058 | 0.865042 | 0.28316  |
| -0.351584842 | 0.952332 | -0.09202 |
| -0.209844825 | 0.938724 | 0.10897  |
| -0.427655168 | 0.999527 | 0.00075  |
| -0.67668654  | 0.948191 | -0.07875 |
| -0.167405251 | 0.843427 | 0.23919  |
| -0.69654054  | 0.822576 | -0.29821 |
| -0.577276308 | 0.994209 | -0.01187 |
| -0.380520385 | 0.907583 | 0.10989  |
| -0.749207776 | 0.72293  | 0.15629  |
| -0.76811329  | 0.876848 | -0.14914 |
| -0.775580774 | 0.840139 | 0.12711  |
| -0.733333589 | 0.953703 | 0.02352  |
| -0.61830627  | 0.442612 | 0.48343  |
| -0.923678144 | 0.881128 | -0.21821 |
| -0.323824171 | 0.989168 | 0.01854  |
| -0.462074955 | 0.953699 | 0.06895  |
| -0.651779602 | 0.892109 | -0.20747 |
| -0.447946635 | 0.902353 | -0.2035  |
| -0.414319919 | 0.95415  | -0.09282 |
| -0.339535643 | 0.994604 | -0.01015 |
| -0.472354688 | 0.830532 | -0.34744 |
| -0.25415205  | 0.992573 | -0.01377 |
| -0.450918983 | 0.993505 | 0.01078  |
| -0.266384418 | 0.992522 | -0.01423 |
| -0.137503524 | 0.934161 | -0.14474 |
| -0.349727094 | 0.975002 | -0.0385  |
| -0.134962822 | 0.999072 | -0.0017  |
| 0.264040119  | 0.883317 | 0.24761  |
| -0.144160243 | 0.905493 | 0.18089  |

|              |          |          |
|--------------|----------|----------|
| -0.670657366 | 0.959617 | -0.0709  |
| 0.024958414  | 0.915476 | 0.18318  |
| -0.583115254 | 0.973643 | -0.05051 |
| -0.245487347 | 0.985066 | 0.02818  |
| -2.073807269 | 0.754378 | -0.44406 |
| -0.5776577   | 0.830835 | -0.17084 |
| -0.197930722 | 0.970864 | -0.05733 |
| -0.47695144  | 0.762172 | 0.52633  |
| -0.966530926 | 0.861528 | -0.11466 |
| -0.125530882 | 0.826738 | -0.41504 |
| 0.474779583  | 0.953097 | -0.11018 |
| 0.561878888  | 0.858751 | 0.30812  |
| -0.569020957 | 0.936668 | -0.11103 |
| -0.062884937 | 0.934883 | -0.15393 |
| -0.38200272  | 0.968105 | -0.06919 |
| -0.366927532 | 0.896384 | 0.12778  |
| -0.263995402 | 0.920825 | 0.11933  |
| -0.054035096 | 0.8588   | 0.25144  |
| 0.897479096  | 0.601666 | 0.8833   |
| -0.2410081   | 0.8171   | -0.32632 |
| -0.042796352 | 0.772929 | 0.28353  |
| -0.312362118 | 0.859299 | 0.20497  |
| -0.406120763 | 0.912457 | 0.12157  |
| -0.39238097  | 0.783905 | 0.16514  |
| -0.281879175 | 0.828222 | 0.20444  |
| -0.811090863 | 0.85638  | 0.12452  |
| 1            | 0.710482 | -1       |
| -0.445869899 | 0.90832  | 0.09656  |
| -0.503358214 | 0.942145 | -0.11144 |
| -0.378511623 | 0.973401 | 0.05445  |
| #DIV/0!      | ?        | #DIV/0!  |
| -1.716685778 | 0.607023 | 0.37991  |
| -0.477352658 | 0.988238 | -0.02175 |
| 0.078714972  | 0.903237 | 0.19032  |
| -0.323687939 | 0.844762 | 0.14399  |
| -0.894917954 | 0.863953 | -0.157   |
| -0.24267926  | 0.951665 | 0.08996  |
| -2.874469118 | 0.561221 | -1.1375  |
| -0.463317514 | 0.972041 | 0.03384  |
| -0.208258137 | 0.907519 | 0.13362  |
| -0.251909345 | 0.630076 | 0.36267  |
| -0.573009698 | 0.791819 | -0.41744 |
| -0.639994925 | 0.930888 | -0.12721 |
| -0.541158406 | 0.984565 | 0.01706  |
| -0.421344541 | 0.963195 | 0.04644  |
| -0.367015984 | 0.965048 | -0.06353 |
| -0.370034005 | 0.9281   | -0.15628 |
| -0.347923303 | 0.980709 | -0.0409  |
| -0.212863357 | 0.986177 | -0.02897 |
| -0.479060425 | 0.825947 | -0.4115  |
| -0.214687757 | 0.840913 | 0.22629  |
| 0.08920161   | 0.935308 | 0.1258   |
| 0.392317423  | 0.814504 | -0.29956 |
| -1.216726145 | 0.768491 | -0.27583 |
| -0.22804999  | 0.968287 | -0.06747 |
| -0.109564134 | 0.914161 | -0.19625 |



|              |          |          |
|--------------|----------|----------|
| -0.541886365 | 0.95755  | -0.06833 |
| -0.247955534 | 0.965656 | 0.06216  |
| -0.480404503 | 0.937805 | 0.11118  |
| -0.775092955 | 0.902745 | -0.15266 |
| -0.173398135 | 0.966237 | 0.07613  |
| -0.701066568 | 0.942299 | 0.11673  |
| -0.281137055 | 0.94712  | -0.10633 |
| -0.302178265 | 0.823651 | -0.39894 |
| -0.4639471   | 0.825059 | -0.44746 |
| -0.666372835 | 0.942334 | -0.09173 |
| -0.464386556 | 0.980997 | -0.03604 |
| -0.273740912 | 0.950113 | 0.07997  |
| -0.765768698 | 0.584337 | -0.22563 |
| -0.339570671 | 0.988307 | 0.02003  |
| -0.520967479 | 0.900651 | 0.08206  |
| -1.067427928 | 0.531944 | -0.26699 |
| -0.362391262 | 0.937233 | -0.12752 |
| -0.533604467 | 0.921322 | -0.15093 |
| -1           | 0.834708 | -0.41504 |
| -0.220207282 | 0.963271 | 0.06825  |
| -3           | 0.803152 | 0.32193  |
| -1.271302022 | 0.297746 | -0.91983 |
| -1           | 0.648511 | -0.67807 |
| 0.368764645  | 0.870503 | 0.307    |
| 0.718229032  | 0.633442 | 0.85316  |
| -0.505334966 | 0.873764 | -0.30886 |
| -2.857980995 | 0.226215 | -1.33442 |
| -0.305963029 | 0.974825 | 0.03134  |
| 0.210473731  | 0.911923 | -0.21988 |
| -0.450323601 | 0.968161 | -0.05989 |
| -0.222772628 | 0.967269 | -0.06652 |
| 0.100194288  | 0.963029 | -0.06054 |
| -1.158520238 | 0.977685 | 0.04015  |
| -0.471405789 | 0.85623  | 0.2125   |
| -0.374427076 | 0.933644 | -0.13478 |
| 0.210051071  | 0.899492 | 0.20366  |
| -0.137503524 | 0.646553 | 0.71049  |
| -0.066559526 | 0.881222 | 0.1796   |
| -2.321928095 | 0.417233 | -1.09954 |
| -0.738834442 | 0.886122 | 0.15239  |
| -0.299419277 | 0.958723 | -0.083   |
| -0.370518833 | 0.979599 | -0.04025 |
| -1.162968794 | 0.999317 | 0.00071  |
| -0.423074818 | 0.906457 | -0.17784 |
| -0.402479917 | 0.99193  | -0.01472 |
| 0.672889193  | 0.813763 | 0.45951  |
| -0.217557648 | 0.89876  | 0.15549  |
| #NUM!        | 0.308068 | #NUM!    |
| -0.246243106 | 0.973643 | 0.03851  |
| -0.278301162 | 0.926578 | 0.14439  |
| -1.588737419 | 0.582861 | 0.41625  |
| -0.192486671 | 0.931084 | -0.13717 |
| -0.175013878 | 0.867972 | 0.20976  |
| 0.037037034  | 0.894933 | 0.19262  |
| -0.416924609 | 0.796796 | -0.2328  |
| -1.129283017 | 0.747404 | -0.55293 |

|              |          |          |
|--------------|----------|----------|
| -1.033535604 | 0.78903  | 0.46009  |
| 0.12758351   | 0.830868 | 0.29529  |
| -0.456393567 | 0.978228 | 0.05062  |
| -0.407392992 | 0.922293 | 0.14013  |
| -1.293120132 | 0.950181 | -0.075   |
| -0.694654277 | 0.963335 | -0.08076 |
| -0.338674724 | 0.968171 | 0.05404  |
| -0.227779926 | 0.932446 | -0.14755 |
| -0.440436018 | 0.89739  | -0.22622 |
| -0.638167118 | 0.96047  | -0.05924 |
| -0.408161701 | 0.897063 | 0.11901  |
| -0.12265368  | 0.791481 | 0.27033  |
| -0.330309845 | 0.983404 | -0.03036 |
| -0.282954068 | 0.860337 | 0.20436  |
| -0.229980125 | 0.933338 | -0.14613 |
| -0.16372252  | 0.928948 | 0.12496  |
| -0.556658851 | 0.974013 | 0.03639  |
| -0.498919909 | 0.939911 | -0.10442 |
| -0.404934722 | 0.924882 | 0.10431  |
| -0.636209882 | 0.947678 | -0.07227 |
| -0.520631297 | 0.943202 | 0.08258  |
| -0.528308198 | 0.880564 | -0.25804 |
| -0.230169772 | 0.840978 | 0.30454  |
| -0.116026749 | 0.955395 | 0.08778  |
| 0.011315313  | 0.986653 | -0.02868 |
| -1.080919995 | 0.841791 | -0.2578  |
| -0.25679678  | 0.990471 | -0.01969 |
| 0.535758503  | 0.777225 | 0.62703  |
| -0.246160587 | 0.858214 | -0.3505  |
| -0.235745184 | 0.638562 | 0.83098  |
| -1.289506617 | 0.793549 | -0.50524 |
| -0.929721304 | 0.941157 | -0.11606 |
| 1.288810867  | 0.903871 | 0.36587  |
| -2.222392421 | 0.920005 | 0.09954  |
| 1.57053543   | 0.546029 | 1.51887  |
| -0.123704918 | 0.962293 | 0.08762  |
| -2.152003093 | 0.615111 | 0.54844  |
| -0.229183001 | 0.868337 | -0.32335 |
| 0.194647431  | 0.993797 | -0.01612 |
| -0.713118852 | 0.791978 | -0.47393 |
| 0.086804828  | 0.891086 | -0.31079 |
| 0.717124682  | 0.872298 | 0.27762  |
| #DIV/0!      | ?        | #DIV/0!  |
| -0.527175923 | 0.860995 | -0.32468 |
| -0.262659241 | 0.974694 | 0.04069  |
| -0.587130337 | 0.987153 | -0.01743 |
| -0.552280083 | 0.958329 | -0.05949 |
| -0.591632393 | 0.968209 | -0.06906 |
| -0.378826709 | 0.970454 | -0.06574 |
| -0.556932836 | 0.982631 | 0.03148  |
| -0.114399373 | 0.937704 | 0.14161  |
| -0.824320324 | 0.681527 | 0.45471  |
| -0.709220604 | 0.968809 | -0.03186 |
| -0.066782751 | 0.90617  | 0.16275  |
| -0.325240526 | 0.992089 | -0.01387 |
| -0.256011484 | 0.882163 | 0.16607  |

|              |          |          |
|--------------|----------|----------|
| 0.736965594  | 0.800451 | -0.848   |
| -0.273347914 | 0.959223 | 0.05267  |
| #NUM!        | 0.622002 | -1       |
| #NUM!        | 0.516926 | -1.45943 |
| -0.433701344 | 0.801257 | -0.4692  |
| -2.128607123 | 0.533292 | -1.23598 |
| -0.714939288 | 0.73124  | -0.63234 |
| -0.458331449 | 0.962689 | -0.05398 |
| -0.274394268 | 0.728161 | 0.4115   |
| -0.372304481 | 0.908594 | -0.15867 |
| -0.098180394 | 0.983584 | 0.03747  |
| -0.253118937 | 0.871988 | -0.13916 |
| -0.115477217 | 0.936602 | -0.11548 |
| -0.410283969 | 0.916752 | 0.1362   |
| 0.097739108  | 0.977838 | -0.03582 |
| -0.426051285 | 0.984782 | -0.02441 |
| -0.283319641 | 0.858677 | 0.18617  |
| -0.121230745 | 0.819223 | 0.3652   |
| -0.102250058 | 0.791442 | 0.4245   |
| 0.047664148  | 0.81354  | 0.21752  |
| 0.047305715  | 0.697522 | -0.90689 |
| -0.511500339 | 0.892047 | -0.22759 |
| -0.935181092 | 0.817426 | -0.38811 |
| -0.419710468 | 0.855797 | -0.17805 |
| -0.901287889 | 0.758514 | 0.34862  |
| #DIV/0!      | ?        | #DIV/0!  |
| -0.061001072 | 0.911485 | -0.19791 |
| -0.25276607  | 0.952997 | 0.09351  |
| 0.054901707  | 0.754617 | 0.27215  |
| -0.965047401 | 0.574251 | -0.62482 |
| -0.557781913 | 0.982726 | -0.02541 |
| -0.503377007 | 0.908836 | 0.11526  |
| -0.384409092 | 0.876708 | 0.16384  |
| -0.169925001 | 0.808    | 0.35364  |
| #DIV/0!      | 1        | #DIV/0!  |
| -0.185413625 | 0.972211 | -0.03635 |
| -0.433096761 | 0.819511 | 0.19354  |
| -0.264674764 | 0.972998 | 0.05627  |
| -0.797479379 | 0.97288  | 0.06162  |
| -1.272340568 | 0.913525 | -0.18742 |
| -0.311397427 | 0.952064 | 0.07591  |
| 0.116454262  | 0.962619 | 0.07319  |
| -0.358793389 | 0.93165  | -0.13883 |
| -0.044004785 | 0.981791 | 0.04165  |
| -0.294303847 | 0.977888 | 0.03692  |
| -0.059378547 | 0.980998 | 0.03449  |
| -0.428478268 | 0.94594  | -0.11014 |
| 0.588986757  | 0.787384 | 0.43951  |
| -0.410754727 | 0.817837 | 0.23183  |
| -0.112399333 | 0.896639 | -0.22955 |
| 0            | 0.949274 | 0.08891  |
| -0.556506998 | 0.984154 | -0.02435 |
| -0.703582961 | 0.963928 | -0.08171 |
| -0.366782331 | 0.853851 | -0.25716 |
| -0.361052252 | 0.91365  | -0.19366 |
| -0.363875922 | 0.947353 | -0.08952 |

|              |          |          |
|--------------|----------|----------|
| -0.485973406 | 0.924206 | -0.09311 |
| -0.172373984 | 0.793264 | 0.30579  |
| -1.080170349 | 0.582942 | -1.12199 |
| -0.427204315 | 0.764448 | 0.29141  |
| 0.686842115  | 0.631912 | 0.61973  |
| -0.612958022 | 0.824666 | -0.37697 |
| -0.278942021 | 0.893539 | -0.20696 |
| 0.283453947  | 0.928893 | 0.14439  |
| 0.140973628  | 0.872104 | -0.30767 |
| -0.364260408 | 0.988562 | 0.02346  |
| -0.649612285 | 0.926985 | -0.07879 |
| 0.847996907  | 0.882108 | -0.38333 |
| -0.443195769 | 0.990158 | -0.02069 |
| -0.552541023 | 0.978356 | 0.03921  |
| -0.698718125 | 0.764505 | -0.44609 |
| -0.705417365 | 0.52695  | 0.73298  |
| -0.420081346 | 0.92757  | -0.13724 |
| -0.255809421 | 0.951948 | 0.09615  |
| -0.367731785 | 0.879312 | 0.13881  |
| -0.495890663 | 0.897403 | -0.1988  |
| -0.841829453 | 0.90855  | -0.18402 |
| -0.974554983 | 0.938304 | -0.1288  |
| -0.329952641 | 0.903095 | -0.21138 |
| -0.329685146 | 0.90196  | -0.16199 |
| -0.367122731 | 0.95895  | -0.08531 |
| 0.26056615   | 0.840747 | 0.3768   |
| -0.160808991 | 0.984139 | -0.02956 |
| -0.263034406 | 1        | 0        |
| 0.498453507  | 0.812993 | 0.38027  |
| -0.111121063 | 0.988489 | -0.02489 |
| 0.584962501  | 0.450185 | -1       |
| -0.641204747 | 0.904591 | -0.21779 |
| -0.360617853 | 0.9539   | -0.09053 |
| -0.497812895 | 0.973023 | -0.03234 |
| 1.112761737  | 0.127924 | 2.69773  |
| 1.379327265  | 0.311072 | 1.96428  |
| -0.424104229 | 0.931941 | -0.08756 |
| -0.228454174 | 0.940354 | -0.10901 |
| -1.579855953 | 0.938697 | -0.0273  |
| -0.921589651 | 0.995415 | -0.00382 |
| -1.259044505 | 0.854124 | -0.19103 |
| 0.118877396  | 0.88183  | 0.22302  |
| -0.115766944 | 0.996848 | 0.00694  |
| -0.598158591 | 0.935161 | -0.07935 |
| -0.38173565  | 0.966619 | -0.05626 |
| 0.036022669  | 0.936374 | 0.12522  |
| -0.452437662 | 0.995694 | 0.00678  |
| -0.303566892 | 0.963228 | -0.07443 |
| -0.404720188 | 0.929841 | -0.15055 |
| 0.059851972  | 0.784491 | 0.32289  |
| 2.263034406  | 0.52729  | 1.67807  |
| -0.310573964 | 0.963525 | 0.07184  |
| -0.677221009 | 0.994578 | 0.01166  |
| -0.924962946 | 0.884414 | -0.06514 |
| -0.337418706 | 0.888869 | 0.14189  |
| -0.378846864 | 0.85795  | 0.13605  |

|              |           |          |
|--------------|-----------|----------|
| -1.156119202 | 0.89868   | 0.19841  |
| -0.103888997 | 0.943676  | -0.10752 |
| -0.603877144 | 0.877255  | -0.19686 |
| -0.889055857 | 0.607029  | -0.35888 |
| -0.854149134 | 0.896381  | -0.18536 |
| -0.501477515 | 0.9559    | 0.0483   |
| -0.354580399 | 0.740108  | -0.40386 |
| -0.584962501 | 0.756486  | -0.58496 |
| -0.430124914 | 0.975748  | -0.04225 |
| -2.584962501 | 0.758682  | -0.58496 |
| -0.072350844 | 0.94944   | -0.10692 |
| -1.061878066 | 0.481376  | -0.19184 |
| -0.502999821 | 0.99599   | 0.00329  |
| -0.430573279 | 0.904973  | -0.18165 |
| -0.200318648 | 0.998209  | -0.00282 |
| -0.293759878 | 0.845391  | 0.17318  |
| -0.342074668 | 0.951618  | -0.10128 |
| -0.36087806  | 0.751323  | 0.18798  |
| 0            | 0.450185  | #NUM!    |
| -0.353396186 | 0.895723  | -0.18694 |
| -0.445437556 | 0.93579   | 0.09649  |
| -0.745733987 | 0.911878  | -0.09516 |
| -0.584329601 | 0.997156  | -0.0019  |
| -0.282568902 | 0.636308  | 0.43215  |
| -0.009536263 | 0.87523   | -0.26208 |
| -0.343246816 | 0.987042  | 0.02554  |
| -0.10230284  | 0.898384  | 0.17806  |
| -0.434812364 | 0.902327  | 0.16073  |
| -0.595018257 | 0.916451  | -0.10289 |
| 2.321928095  | 0.523243  | 2        |
| 0.008619665  | 0.885739  | 0.24281  |
| 0.777607579  | 0.662394  | 0.77761  |
| -0.370649854 | 0.991455  | 0.00959  |
| -0.310432456 | 0.994406  | 0.00978  |
| -0.437405312 | 0.830632  | 0.20994  |
| -0.459761696 | 0.987525  | 0.02006  |
| 1.199047332  | 0.510445  | 1.36557  |
| 0.415037499  | 0.769784  | 0.53051  |
| 0.807354922  | 0.293028  | 3.72792  |
| 0.102051271  | 0.830999  | 0.25546  |
| -0.365155826 | 0.923515  | 0.11042  |
| -0.34117946  | 0.961989  | -0.07509 |
| -0.317406181 | 0.0570899 | 0.79791  |
| -0.514573173 | 0.845346  | -0.23447 |
| -0.584962501 | 0.622002  | 0.22239  |
| 1.662965013  | 0.180062  | 1.73697  |
| #DIV/0!      | ?         | #DIV/0!  |
| 0.184123915  | 0.937005  | 0.12993  |
| 1.494764692  | 0.343801  | 2.03242  |
| #NUM!        | 0.308068  | #NUM!    |
| -0.186255609 | 0.85615   | -0.31282 |
| -0.589538338 | 0.891096  | -0.11086 |
| -0.041493503 | 0.977422  | 0.04495  |
| -0.278523041 | 0.859419  | 0.2042   |
| -0.240094423 | 0.936015  | 0.10656  |
| -0.422138556 | 0.974353  | -0.04948 |

|              |          |          |
|--------------|----------|----------|
| -0.813088092 | 0.938983 | -0.06824 |
| -0.88427564  | 0.976629 | 0.0404   |
| -0.370648358 | 0.976446 | -0.03512 |
| -0.281513826 | 0.966771 | -0.07573 |
| -0.506777637 | 0.988348 | -0.0237  |
| -0.590480139 | 0.997863 | 0.00347  |
| #NUM!        | 0.308068 | #NUM!    |
| -1.356419951 | 0.885674 | -0.22354 |
| -0.602398788 | 0.971412 | -0.05397 |
| -0.551930875 | 0.93217  | -0.1103  |
| -0.676958285 | 0.890079 | -0.18076 |
| -0.571541985 | 0.993132 | 0.01045  |
| -0.407541596 | 0.983129 | -0.02985 |
| -0.183441571 | 0.881026 | 0.15078  |
| -0.292035183 | 0.803562 | 0.25475  |
| -0.390014976 | 0.918752 | 0.14196  |
| -0.514622681 | 0.846895 | 0.14558  |
| -0.167148985 | 0.870231 | 0.20225  |
| -0.243445815 | 0.984329 | -0.03194 |
| -0.306794428 | 0.948624 | 0.07541  |
| -0.417542489 | 0.933803 | 0.08538  |
| -0.535265116 | 0.992225 | -0.0122  |
| -0.65840672  | 0.954907 | 0.04728  |
| -0.490850865 | 0.953133 | 0.06468  |
| -0.573684797 | 0.961802 | 0.05816  |
| -0.546011602 | 0.912164 | 0.1573   |
| -0.134828388 | 0.965379 | -0.06583 |
| -0.586597283 | 0.641872 | 0.46876  |
| -0.293055185 | 0.943049 | 0.08035  |
| -0.183158735 | 0.828437 | 0.19989  |
| -0.455569501 | 0.889006 | 0.13859  |
| -0.238019089 | 0.942677 | -0.11559 |
| -0.374572603 | 0.953596 | -0.09766 |
| -0.351597386 | 0.953347 | -0.09944 |
| -0.569953656 | 0.92357  | -0.15046 |
| -0.486219829 | 0.964427 | -0.06955 |
| -0.45439813  | 0.830725 | 0.20393  |
| -0.537757542 | 0.946945 | -0.09962 |
| -0.191514205 | 0.912245 | -0.18409 |
| -0.639661123 | 0.992938 | 0.00933  |
| -0.287108824 | 0.939958 | 0.09176  |
| -0.465203524 | 0.99662  | 0.00741  |
| -0.116045383 | 0.947077 | -0.13303 |
| -0.378676512 | 0.963083 | 0.06291  |
| -0.364195538 | 0.921897 | -0.15526 |
| -0.5092308   | 0.942623 | -0.09164 |
| -0.47939328  | 0.956712 | 0.06915  |
| -0.432692883 | 0.913325 | -0.18761 |
| -0.373938207 | 0.952646 | -0.09054 |
| -0.390522748 | 0.962553 | -0.0857  |
| -0.696371262 | 0.993821 | -0.00516 |
| -0.500273713 | 0.927811 | -0.14101 |
| -0.285971217 | 0.959477 | 0.07104  |
| 1.440572591  | 0.591782 | 1.28011  |
| 0.255175051  | 0.892899 | 0.19151  |
| -0.51289776  | 0.943583 | 0.09073  |

|              |          |          |
|--------------|----------|----------|
| -0.293046975 | 0.858044 | 0.20002  |
| -0.49683159  | 0.952953 | 0.07111  |
| -0.265468368 | 0.965857 | -0.07562 |
| -1.478903178 | 0.765043 | -0.08078 |
| -0.628077748 | 0.919928 | -0.09793 |
| -0.72021106  | 0.9166   | -0.09859 |
| -0.066997879 | 0.811122 | 0.2701   |
| -0.806383083 | 0.924728 | 0.07153  |
| -0.113121796 | 0.854064 | 0.29602  |
| 2            | 0.567924 | 2        |
| 0.325575872  | 0.857108 | 0.35443  |
| -0.263034406 | 0.947419 | 0.08955  |
| -0.388239083 | 0.877584 | 0.15283  |
| -0.351838385 | 0.994293 | -0.00869 |
| -0.335120393 | 0.935403 | 0.09668  |
| -0.49968752  | 0.981487 | -0.03592 |
| -0.468476758 | 0.905502 | -0.16633 |
| -0.58459385  | 0.843664 | -0.33846 |
| -0.449553399 | 0.844433 | -0.32267 |
| -0.170570358 | 0.966236 | 0.05817  |
| -1.584962501 | 1        | 0        |
| -2.584962501 | 0.489569 | -0.67807 |
| -0.445597949 | 0.801836 | -0.43435 |
| -0.526689459 | 0.943807 | -0.10824 |
| -0.646555061 | 0.837256 | -0.31456 |
| -0.220152956 | 0.960659 | -0.09031 |
| -0.526279439 | 0.912137 | -0.18439 |
| -0.291196302 | 0.999246 | 0.00152  |
| -0.213007637 | 0.967994 | 0.05202  |
| -0.304257069 | 0.988776 | 0.02551  |
| -0.574661053 | 0.93171  | -0.14537 |
| -0.176877762 | 0.814285 | 0.29956  |
| -0.564144728 | 0.973841 | 0.03683  |
| -0.655523998 | 0.911477 | 0.17184  |
| -0.08053272  | 0.985779 | -0.02825 |
| 0.232823435  | 0.97377  | 0.06319  |
| -1.235073003 | 0.845233 | -0.32279 |
| -0.573185333 | 0.803074 | 0.35466  |
| -0.497165087 | 0.969778 | 0.04613  |
| 0            | 0.613399 | -1.58496 |
| -0.471756689 | 0.924784 | -0.07197 |
| -1.403932545 | 0.91234  | 0.12329  |
| -0.752325228 | 0.859072 | 0.25557  |
| -0.516502042 | 0.907782 | 0.20675  |
| -2.127335701 | 0.650346 | -0.83417 |
| -1.372455653 | 0.804217 | 0.43897  |
| #NUM!        | 0.622002 | -1       |
| -0.770382465 | 0.831994 | -0.18788 |
| 0.023248946  | 0.951102 | 0.10361  |
| -0.387752731 | 0.941605 | -0.1259  |
| -0.736965594 | 0.964007 | -0.074   |
| -0.356775911 | 0.964036 | -0.07292 |
| -0.102188311 | 0.996322 | -0.00779 |
| -0.61667136  | 0.842221 | 0.26651  |
| -0.38020195  | 0.907965 | 0.13954  |
| 0.290045928  | 0.772547 | 0.37747  |

|              |          |          |
|--------------|----------|----------|
| 3.584962501  | 0.159277 | 3.80735  |
| 0.38332864   | 0.92412  | -0.20163 |
| -0.005655259 | 0.83568  | 0.19433  |
| 0.56218503   | 0.758517 | 0.4945   |
| -1.222392421 | 0.864954 | -0.22239 |
| -0.240134004 | 0.806084 | 0.2859   |
| -0.583678164 | 0.978273 | 0.03051  |
| -0.624108201 | 0.956204 | 0.02535  |
| -0.782333784 | 0.737816 | 0.11437  |
| -0.325833041 | 0.513644 | 0.54512  |
| -0.745381351 | 0.988235 | -0.01401 |
| -0.61180956  | 0.868626 | 0.1533   |
| -0.805074138 | 0.9151   | -0.07454 |
| -0.486027469 | 0.363347 | 0.43629  |
| -0.910502831 | 0.579426 | 0.15582  |
| -0.4375297   | 0.886844 | -0.26005 |
| -0.549437436 | 0.892726 | -0.22484 |
| -0.303357412 | 0.96589  | 0.05948  |
| -0.318373069 | 0.756304 | 0.27237  |
| 0.155278225  | 0.934737 | 0.15528  |
| -0.517626778 | 0.933275 | 0.05197  |
| -0.572618511 | 0.972854 | 0.04275  |
| -0.518378904 | 0.879739 | 0.1414   |
| -1.052980252 | 0.955269 | -0.03241 |
| 0.12046476   | 0.923043 | -0.14818 |
| 0.274174963  | 0.539466 | 0.81405  |
| -1.626672753 | 0.881569 | 0.24043  |
| -0.412745428 | 0.976105 | -0.04151 |
| -0.389382833 | 0.950309 | -0.08981 |
| -0.551726409 | 0.930659 | -0.12187 |
| -0.720676731 | 0.919066 | -0.16365 |
| -0.556834373 | 0.874377 | -0.24965 |
| -0.255838904 | 0.960313 | -0.08762 |
| -0.530301284 | 0.931195 | 0.08835  |
| -0.528617686 | 0.924936 | -0.13384 |
| -0.23281582  | 0.915227 | 0.15182  |
| -0.483374629 | 0.787944 | -0.42018 |
| -0.395718978 | 0.983118 | 0.02818  |
| 0.382872784  | 0.722802 | 0.55318  |
| -0.317441001 | 0.95233  | 0.09795  |
| -0.259063661 | 0.966776 | 0.06212  |
| -0.397404267 | 0.913551 | -0.19582 |
| -0.396108769 | 0.975465 | 0.04991  |
| -0.246920396 | 0.900376 | 0.19973  |
| -0.507777314 | 0.892707 | -0.20117 |
| -0.352167158 | 0.875073 | -0.28738 |
| -0.52138948  | 0.998853 | -0.00244 |
| -0.406547776 | 0.988065 | -0.02351 |
| -0.266066872 | 0.902942 | -0.23503 |
| -0.694654789 | 0.908885 | 0.19715  |
| -0.339582772 | 0.942148 | -0.12736 |
| -0.297939008 | 0.956324 | -0.09352 |
| -0.519225892 | 0.980792 | -0.03568 |
| -0.106773839 | 0.970539 | -0.06773 |
| -0.196987496 | 0.942757 | -0.12903 |
| -0.293445719 | 0.956614 | -0.0726  |



|              |           |          |
|--------------|-----------|----------|
| 0.214953257  | 0.929095  | 0.15981  |
| -0.241870717 | 0.923959  | -0.15774 |
| -0.576275279 | 0.875175  | 0.22754  |
| -0.374815613 | 0.966295  | -0.06221 |
| -0.477205113 | 0.945792  | -0.10145 |
| -0.720433724 | 0.996278  | -0.00537 |
| -0.179402841 | 0.979879  | 0.03878  |
| -0.397687519 | 0.797145  | -0.53051 |
| -0.41363731  | 0.901998  | -0.22219 |
| -0.781743852 | 0.978217  | 0.03818  |
| -0.397045344 | 0.92338   | -0.151   |
| -0.336740622 | 0.979818  | -0.04235 |
| -0.533556191 | 0.886658  | -0.25392 |
| -0.191108754 | 0.950964  | -0.11671 |
| 0.204445742  | 0.940658  | 0.14086  |
| -0.351728108 | 0.863572  | 0.17322  |
| -0.578400717 | 0.93484   | -0.0977  |
| -0.71115426  | 0.984909  | -0.01829 |
| -0.818595977 | 0.84899   | -0.31484 |
| -0.323907553 | 0.851243  | 0.17607  |
| -0.160898087 | 0.850622  | 0.22677  |
| -0.390248074 | 0.942487  | 0.09355  |
| -0.309411121 | 0.885112  | -0.26865 |
| -1           | 1         | 0        |
| -2.906890596 | 0.0790957 | -1.09954 |
| -0.775356564 | 0.284584  | -2.66305 |
| -0.17957888  | 0.975198  | -0.05224 |
| -0.638100786 | 0.860646  | -0.22642 |
| -0.602627867 | 0.967553  | 0.04887  |
| -0.126830022 | 0.958269  | 0.08326  |
| -0.385290156 | 0.848599  | -0.27208 |
| -0.524017424 | 0.972482  | 0.02388  |
| -0.378015369 | 0.817656  | 0.19952  |
| -0.312575538 | 0.944954  | 0.08582  |
| -0.288372601 | 0.979047  | -0.04669 |
| -0.488339189 | 0.920431  | 0.14051  |
| -0.160885583 | 0.725928  | 0.34998  |
| -0.469438961 | 0.960839  | 0.06801  |
| -0.573133447 | 0.944418  | -0.11714 |
| -0.887842242 | 0.949295  | -0.097   |
| -0.712022045 | 0.745175  | -0.41376 |
| -0.942980766 | 0.978994  | -0.0342  |
| -0.320678467 | 0.84449   | 0.27878  |
| -1           | 0.474021  | 1        |
| -0.973961944 | 0.826455  | -0.3296  |
| 0.147855429  | 0.870859  | 0.26418  |
| -1.115477217 | 0.958978  | -0.05658 |
| -0.439410448 | 0.853575  | 0.18709  |
| -0.182864057 | 0.809191  | -0.32623 |
| -1.229047709 | 0.753354  | -0.57423 |
| -0.844013129 | 0.862475  | -0.25821 |
| -0.554303914 | 0.955561  | 0.05738  |
| -0.589073917 | 0.965295  | -0.07413 |
| -0.141022432 | 0.955566  | 0.06349  |
| -0.581977684 | 0.982879  | -0.02691 |
| -0.517006476 | 0.872176  | 0.1534   |

|              |          |          |
|--------------|----------|----------|
| 0.284729477  | 0.610002 | 0.7578   |
| -0.100769657 | 0.91593  | -0.18215 |
| -0.357694458 | 0.926393 | -0.13614 |
| #DIV/0!      | 0.657795 | #DIV/0!  |
| -1.410128699 | 0.599627 | -0.80441 |
| -0.338442877 | 0.995521 | -0.00917 |
| -0.547700089 | 0.961165 | -0.07551 |
| -0.415037499 | 0.594273 | -1       |
| 1.087462841  | 0.163783 | 2.08746  |
| -1.720983296 | 0.618628 | -0.65526 |
| -0.418374755 | 0.907635 | -0.16697 |
| -0.683282435 | 0.924595 | 0.0871   |
| -1.438401492 | 0.476661 | -1.09427 |
| -0.305076177 | 0.881121 | -0.18745 |
| -0.737481002 | 0.803526 | -0.17076 |
| -3.189186904 | 0.261718 | -0.72132 |
| -0.458830621 | 0.982067 | 0.03199  |
| -0.683972507 | 0.803818 | -0.40916 |
| -0.061400545 | 0.740958 | -0.77761 |
| -1           | 0.563726 | -1.32193 |
| 0.584962501  | 0.934798 | -0.152   |
| -0.757306914 | 0.919325 | -0.14358 |
| -0.979244925 | 0.767606 | -0.4707  |
| -0.239212586 | 0.985032 | 0.02312  |
| -1.321928095 | 0.391002 | -0.73697 |
| -0.336571123 | 0.978562 | 0.03579  |
| 0.179168846  | 0.890226 | 0.21042  |
| -0.723290657 | 0.955365 | 0.07235  |
| -0.331393198 | 0.963288 | -0.07529 |
| -1           | 0.622002 | 0.80735  |
| -0.492731628 | 0.982823 | 0.02885  |
| -0.37186835  | 0.926081 | -0.17014 |
| -0.333166971 | 0.911795 | -0.20744 |
| -0.438744466 | 0.956625 | -0.10095 |
| -0.233895658 | 0.931994 | -0.16454 |
| -0.618193929 | 0.97935  | 0.02598  |
| -0.538836932 | 0.907324 | -0.16113 |
| -0.229595107 | 0.645833 | 0.40194  |
| -0.488105199 | 0.819663 | 0.17582  |
| -0.254748779 | 0.890078 | -0.20932 |
| -0.365442544 | 0.970888 | -0.05521 |
| -0.438927741 | 0.995052 | 0.0059   |
| -0.601414618 | 0.954154 | 0.06233  |
| -0.511619999 | 0.92841  | 0.09123  |
| -0.35781411  | 0.984617 | -0.02619 |
| -0.443355551 | 0.947901 | -0.0947  |
| -0.3472641   | 0.967825 | 0.05515  |
| -1.196121072 | 0.763346 | -0.48675 |
| -0.414546369 | 0.847708 | 0.24412  |
| -0.252455293 | 0.990622 | 0.01939  |
| -0.128468369 | 0.87764  | 0.18832  |
| -0.586349501 | 0.980233 | 0.03219  |
| -0.466633387 | 0.927444 | -0.09465 |
| -0.384911836 | 0.973321 | 0.04462  |
| -0.449311095 | 0.955709 | 0.08013  |
| -0.458294466 | 0.966462 | 0.06275  |

|              |          |          |
|--------------|----------|----------|
| -0.797907318 | 0.933691 | 0.0431   |
| -0.514838261 | 0.996974 | 0.00572  |
| -0.197754096 | 0.920091 | 0.12273  |
| -0.329667563 | 0.868281 | -0.28909 |
| -0.145470567 | 0.97615  | 0.0469   |
| #DIV/0!      | 1        | #DIV/0!  |
| -0.238525836 | 0.961881 | 0.05953  |
| #NUM!        | 0.308068 | #NUM!    |
| -0.038608454 | 0.758917 | 0.33807  |
| -1.606127111 | 0.470708 | 0.80802  |
| -0.79026066  | 0.577943 | -0.67878 |
| -1.399607459 | 0.521591 | -0.34104 |
| -0.227268043 | 0.912966 | -0.18682 |
| -0.675607865 | 0.943235 | -0.08901 |
| -0.807354922 | 0.545049 | -0.63743 |
| #NUM!        | 0.438509 | -2       |
| -0.47669927  | 0.96787  | -0.04711 |
| -0.459431619 | 0.24009  | #NUM!    |
| 0.260375005  | 0.87131  | 0.31499  |
| -0.620551253 | 0.899945 | 0.10969  |
| -0.041412078 | 0.831405 | 0.25777  |
| 0.013357539  | 0.608969 | 0.53588  |
| 0.074000581  | 0.764673 | 0.47999  |
| -2.437676853 | 0.243523 | -3.03115 |
| -1.876011696 | 0.749986 | -0.51301 |
| 0.091147888  | 0.840444 | -0.33374 |
| -0.756074417 | 0.774516 | 0.48452  |
| 0.119581616  | 0.913622 | 0.20815  |
| -0.214319121 | 0.910553 | 0.178    |
| 0.324392135  | 0.948484 | 0.10405  |
| 0.183711953  | 0.916703 | 0.20961  |
| 4.754887502  | 0.919828 | 1.67243  |
| -1.023632531 | 0.750386 | -0.56503 |
| -0.314773376 | 0.981089 | -0.03737 |
| -0.349020239 | 0.941363 | -0.12538 |
| -0.097712938 | 0.936562 | 0.10345  |
| -0.09909358  | 0.914384 | 0.16401  |
| -0.454922723 | 0.934174 | -0.12356 |
| -0.380092907 | 0.958354 | -0.07888 |
| -0.2410081   | 0.925634 | 0.12371  |
| -0.402032691 | 0.94364  | -0.10806 |
| -0.511025672 | 0.990449 | 0.01417  |
| -0.624288821 | 0.844691 | 0.22309  |
| -0.242192416 | 0.9709   | -0.0588  |
| -0.543518679 | 0.978638 | 0.03701  |
| -1.138842728 | 0.625314 | -0.74879 |
| -0.60604075  | 0.923575 | 0.08136  |
| -0.219762295 | 0.963757 | 0.05856  |
| -0.563068146 | 0.99753  | -0.00349 |
| -0.406336447 | 0.995372 | -0.01065 |
| -2.415037499 | 0.89667  | -0.19265 |
| -0.722382538 | 0.844319 | -0.27713 |
| -0.103093493 | 0.989536 | -0.02279 |
| -0.150091033 | 0.968489 | 0.05482  |
| -0.487206904 | 0.986523 | -0.02635 |
| -0.367569355 | 0.926613 | 0.08435  |

|              |          |          |
|--------------|----------|----------|
| 0.044394119  | 0.892969 | -0.20126 |
| 0.994981925  | 0.949169 | 0.16993  |
| -0.379648865 | 0.967932 | 0.04577  |
| -0.327071398 | 0.879341 | -0.24163 |
| -0.360895448 | 0.989842 | -0.01968 |
| -0.591560921 | 0.989461 | -0.01323 |
| 0.2410081    | 0.990234 | -0.01886 |
| -0.349535882 | 0.978588 | -0.04415 |
| -0.263034406 | 0.892901 | -0.26303 |
| -0.503388142 | 0.91138  | 0.14556  |
| -0.224481165 | 0.9844   | 0.02483  |
| -0.355663733 | 0.993113 | -0.0134  |
| -0.272246144 | 0.91334  | 0.12671  |
| 0.078629444  | 0.9782   | 0.04261  |
| -0.473388865 | 0.930851 | -0.09413 |
| -0.17547297  | 0.994328 | 0.01192  |
| -0.643705246 | 0.946114 | -0.08455 |
| -0.362968779 | 0.913803 | 0.1408   |
| -0.285620725 | 0.9757   | -0.04211 |
| -0.479188209 | 0.978697 | 0.03749  |
| -0.415037499 | 0.987293 | -0.02325 |
| -0.93353968  | 0.993116 | -0.01204 |
| -0.261494984 | 0.966236 | 0.06033  |
| -0.451460908 | 0.993333 | -0.01092 |
| -0.379824358 | 0.920457 | -0.14698 |
| 0.125530882  | 0.880748 | -0.31988 |
| -0.611414765 | 0.984421 | 0.01855  |
| -0.315462099 | 0.976827 | -0.03346 |
| -0.301017715 | 0.988129 | 0.02262  |
| -0.421732152 | 0.926964 | 0.12561  |
| -0.19882895  | 0.946115 | -0.11224 |
| -0.569436735 | 0.88107  | 0.09625  |
| -0.087462841 | 1        | 0        |
| -2.321928095 | 0.415333 | -2.32193 |
| 0.319278516  | 0.954906 | -0.10285 |
| -1.344529524 | 0.365137 | -1       |
| -0.258635942 | 1        | 0        |
| 0.499571009  | 0.939905 | 0.14202  |
| -0.630219828 | 0.999316 | -0.00129 |
| -0.492552485 | 0.927297 | 0.09167  |
| -1.222392421 | 0.770719 | -0.48543 |
| -0.245480846 | 0.900697 | 0.13472  |
| -0.458522907 | 0.910554 | -0.14054 |
| -0.231796841 | 0.908035 | 0.11557  |
| -0.774504849 | 0.815925 | -0.25261 |
| 0.251538767  | 0.832975 | -0.46158 |
| -0.378578758 | 0.984678 | -0.02985 |
| -0.638807933 | 0.921081 | -0.1214  |
| -0.670744329 | 0.94548  | -0.03385 |
| -0.24951547  | 0.965552 | -0.06276 |
| -1.801454321 | 0.729844 | -0.34912 |
| -0.736965594 | 1        | 0        |
| -0.226679847 | 0.857079 | 0.20084  |
| -0.299307687 | 0.999371 | 0.00126  |
| -0.739580599 | 0.973408 | 0.03917  |
| -0.330645653 | 0.891962 | 0.1435   |

|              |           |          |
|--------------|-----------|----------|
| -0.291973641 | 0.994009  | 0.01078  |
| -0.233887874 | 0.984157  | 0.03212  |
| -0.387587521 | 0.971437  | 0.04336  |
| -0.425690417 | 0.937029  | -0.11652 |
| -0.607682577 | 0.977511  | -0.0458  |
| -1.287925581 | 0.419505  | -1.49638 |
| 0.423059921  | 0.557564  | 0.51475  |
| 0.604862058  | 0.706632  | 0.70044  |
| -1.401571432 | 0.387459  | -1.27117 |
| -0.247596615 | 0.986231  | 0.02747  |
| -0.012530395 | 0.967439  | 0.06866  |
| -0.118949861 | 0.979612  | -0.04658 |
| -0.449214615 | 0.954029  | -0.10664 |
| -0.101870811 | 0.955695  | 0.0916   |
| -0.706071586 | 0.45269   | -1.44916 |
| -1.25976783  | 0.730699  | -0.57869 |
| -0.34385131  | 0.820054  | 0.29701  |
| 0.207324973  | 0.862483  | 0.32018  |
| -0.308950241 | 0.905824  | 0.1471   |
| -0.435202364 | 0.951829  | 0.07584  |
| 2.480625841  | 0.275449  | 1.88662  |
| #NUM!        | 0.18169   | -0.73697 |
| -0.373043411 | 0.926142  | -0.1745  |
| -0.138810344 | 0.945004  | 0.11683  |
| -0.295826615 | 0.986495  | -0.02419 |
| -0.358399296 | 0.963679  | 0.08242  |
| -0.220967537 | 0.994265  | 0.01267  |
| 0.470317315  | 0.911645  | 0.18667  |
| 0            | 0.767557  | -0.51457 |
| 0.664209252  | 0.757501  | -0.8292  |
| -2.817135943 | 0.244372  | -2.35147 |
| -1.415037499 | 0.594273  | 0.32193  |
| -3.975752454 | 0.0790173 | -2.79518 |
| -4.845490051 | 0.245981  | -6.84549 |
| 1.653846489  | 0.969959  | -0.115   |
| 1.56331675   | 0.884126  | 0.40442  |
| 0.896802079  | 0.584706  | 0.87496  |
| 1.114267511  | 0.590306  | 0.85552  |
| 1.094517599  | 0.545637  | 1.09873  |
| -0.12990058  | 0.918693  | 0.15132  |
| 0.652076697  | 0.631511  | 1.09954  |
| 1.743224585  | 0.883025  | 0.38333  |
| 0.630301685  | 0.741986  | 0.66111  |
| 1            | 0.308068  | 2        |
| -0.167263924 | 0.96163   | 0.06375  |
| -0.327634677 | 0.92492   | 0.1072   |
| -0.368972962 | 0.994581  | 0.01069  |
| -0.276518381 | 0.970783  | 0.04862  |
| -0.237576998 | 0.917727  | -0.1801  |
| -0.441079506 | 0.963697  | -0.05271 |
| -0.374626097 | 0.932773  | -0.12172 |
| -0.650527909 | 0.869226  | 0.20211  |
| -0.415037499 | 0.930186  | 0.12338  |
| -0.416261199 | 0.974866  | -0.04327 |
| -0.235378063 | 0.870669  | -0.29884 |
| -0.095165385 | 0.996056  | 0.00757  |

|              |          |          |
|--------------|----------|----------|
| -0.170877263 | 0.91589  | -0.18709 |
| -0.418935241 | 0.894949 | -0.22966 |
| -0.198454367 | 0.877227 | 0.16594  |
| -0.413436823 | 0.989637 | 0.02149  |
| -0.079108991 | 0.925027 | 0.12617  |
| -0.406320282 | 0.956195 | -0.07499 |
| -0.587611106 | 0.900084 | -0.10822 |
| 0.362570079  | 0.302445 | 0.89308  |
| -0.321457581 | 0.892808 | 0.13258  |
| #DIV/0!      | ?        | #DIV/0!  |
| -2.459431619 | 0.522485 | -1.45943 |
| #DIV/0!      | 1        | #DIV/0!  |
| -0.148607593 | 0.986197 | 0.02566  |
| 0            | 0.651448 | 1        |
| -1.233797185 | 0.874912 | 0.23048  |
| -0.089561307 | 0.958696 | 0.10098  |
| -0.455945443 | 0.910457 | 0.19961  |
| -2.192120748 | 0.956592 | 0.06461  |
| -0.426464846 | 0.851604 | 0.18971  |
| 0            | 0.710482 | -1       |
| -0.514573173 | 0.731552 | -0.44746 |
| -0.417157551 | 0.98403  | 0.03143  |
| -0.087636103 | 0.985663 | -0.03049 |
| -0.345786505 | 0.962552 | 0.0571   |
| 0            | 0.544016 | 1.32193  |
| -0.617838657 | 0.974463 | -0.04057 |
| -0.41077196  | 0.890648 | -0.23359 |
| -0.548826595 | 0.822566 | -0.41005 |
| -0.532303174 | 0.912065 | -0.17952 |
| -0.521443111 | 0.9725   | -0.05251 |
| -0.458764997 | 0.973793 | -0.05018 |
| -0.255709516 | 0.939742 | -0.1121  |
| -0.88294564  | 0.964918 | -0.06711 |
| -0.235289415 | 0.990034 | 0.0174   |
| -0.442209878 | 0.93592  | -0.10758 |
| -0.13093087  | 0.701635 | 0.38003  |
| -0.132188358 | 0.986862 | 0.02496  |
| -0.503427223 | 0.804385 | 0.24059  |
| -0.162081546 | 0.790378 | 0.26037  |
| -0.179733539 | 0.936579 | -0.13908 |
| -0.292910314 | 0.999501 | 0.0009   |
| 1.137503524  | 0.635149 | 1.1375   |
| -0.265590111 | 0.918655 | -0.12476 |
| -0.226218186 | 0.962428 | 0.07155  |
| -1.384759411 | 0.919366 | -0.16399 |
| -0.400175413 | 0.91978  | 0.14458  |
| 1.023083613  | 0.273186 | 2.81399  |
| -0.136556252 | 0.687123 | 0.40791  |
| -0.436099115 | 0.973909 | 0.04559  |
| 0.079287896  | 0.963759 | -0.08437 |
| -0.585129028 | 0.970015 | -0.03858 |
| -0.615710951 | 0.916749 | -0.14473 |
| -0.967104622 | 0.674594 | -0.18571 |
| 0.004365193  | 0.961296 | -0.08555 |
| -0.308622372 | 0.981716 | 0.03851  |
| -0.497539468 | 0.899649 | 0.08424  |

|              |          |          |
|--------------|----------|----------|
| -0.438986147 | 0.939014 | -0.12598 |
| -0.471401814 | 0.949886 | 0.07059  |
| -0.358006554 | 0.952029 | 0.06609  |
| -0.377360095 | 0.974232 | -0.04683 |
| -0.552225714 | 0.970534 | -0.03646 |
| -0.285955021 | 0.990413 | 0.01675  |
| #NUM!        | 1        | 0        |
| -0.693703131 | 0.950184 | 0.05641  |
| -0.242619693 | 0.996871 | -0.00666 |
| -0.440828926 | 0.943128 | -0.10693 |
| -0.368316201 | 0.985959 | 0.02684  |
| -0.269454025 | 0.949783 | -0.11225 |
| -0.305656149 | 0.974953 | 0.05285  |
| -0.439912168 | 0.710493 | 0.30705  |
| 0.289863109  | 0.698855 | 0.4434   |
| -0.734209271 | 0.739543 | -0.19465 |
| 0            | 0.582444 | 0.68589  |
| -0.145494743 | 0.934514 | 0.11641  |
| -0.369516361 | 0.959569 | -0.08099 |
| -0.497598688 | 0.960683 | -0.07821 |
| -0.610175147 | 0.975503 | -0.04044 |
| -0.345090352 | 0.988934 | -0.02156 |
| -0.505554874 | 0.997773 | 0.00364  |
| -0.668940491 | 0.932534 | 0.08695  |
| -1.173287926 | 0.908937 | 0.13488  |
| -1.227004045 | 0.753856 | 0.28701  |
| -0.743651364 | 0.959888 | -0.04998 |
| -0.4066813   | 0.88883  | 0.14238  |
| -0.32750451  | 0.971521 | 0.05382  |
| -0.327016972 | 0.971329 | -0.05172 |
| -0.178597303 | 0.928074 | -0.13816 |
| 0.222392421  | 0.962702 | 0.078    |
| -1           | 0.759674 | -0.31853 |
| -0.189025898 | 0.949884 | -0.10521 |
| -0.131782852 | 0.9976   | 0.00484  |
| -0.381299758 | 0.988796 | 0.02356  |
| 0.043501639  | 0.819359 | 0.35272  |
| -0.556638396 | 0.953571 | 0.07102  |
| -0.331121449 | 0.97818  | -0.04251 |
| 0.310051032  | 0.941788 | 0.16094  |
| -0.208072616 | 0.958686 | 0.07283  |
| -0.21964181  | 0.896098 | 0.17603  |
| -0.383959188 | 0.916475 | -0.18541 |
| -0.201493528 | 0.997306 | -0.00562 |
| -0.060787718 | 0.953193 | 0.11294  |
| -0.275306341 | 0.973839 | 0.05864  |
| -0.23203775  | 0.977577 | -0.05033 |
| -0.267539814 | 0.951345 | -0.10321 |
| -0.327431071 | 0.991932 | -0.01472 |
| 0.069864807  | 0.939761 | 0.12392  |
| -0.181324727 | 0.966376 | -0.07945 |
| -0.427943483 | 0.8624   | 0.21924  |
| -0.242803469 | 0.909968 | 0.17937  |
| -0.149339811 | 0.820949 | 0.36319  |
| -0.537070777 | 0.949215 | -0.08148 |
| -0.284076821 | 0.88565  | -0.2314  |

|              |          |          |
|--------------|----------|----------|
| -0.409591127 | 0.902615 | -0.22275 |
| -0.447973903 | 0.948205 | -0.09509 |
| -0.713118852 | 0.935744 | 0.1375   |
| -0.634757768 | 0.965367 | -0.04814 |
| -0.484979202 | 0.919659 | 0.12432  |
| -0.331598692 | 0.722719 | 0.32152  |
| -0.179102562 | 0.981134 | -0.04196 |
| -0.204819792 | 0.99117  | 0.01845  |
| -0.266632151 | 0.922368 | -0.18778 |
| -0.416679725 | 0.880572 | -0.27292 |
| 0.584962501  | 0.885352 | -0.41504 |
| -0.490271134 | 0.999689 | -0.0006  |
| -0.554246651 | 0.967975 | -0.05043 |
| -0.434458403 | 0.993499 | -0.01091 |
| -0.318127403 | 0.964481 | 0.06425  |
| -0.365311543 | 0.996738 | -0.0064  |
| -0.387050874 | 0.961555 | -0.08278 |
| -0.248737417 | 0.977858 | -0.04212 |
| -0.190789521 | 0.999865 | 0.0003   |
| -0.331478888 | 0.886107 | -0.20906 |
| -0.438426492 | 0.988663 | -0.01737 |
| -0.686093635 | 0.987651 | 0.02215  |
| -0.084577771 | 0.972711 | -0.04696 |
| -0.354683032 | 0.906954 | -0.20935 |
| -0.554870889 | 0.983481 | -0.03605 |
| -0.507966659 | 0.790834 | 0.25383  |
| -0.302197461 | 0.998955 | -0.00229 |
| -1.833473575 | 0.682505 | -0.7048  |
| -0.325367179 | 0.9889   | 0.02317  |
| -0.244543084 | 0.961385 | 0.07866  |
| -0.417275971 | 0.982795 | 0.0244   |
| -0.291277882 | 0.962602 | -0.07447 |
| -0.409136898 | 0.826215 | 0.21519  |
| -0.324014422 | 0.956495 | 0.06999  |
| 0.067114196  | 0.945845 | 0.12357  |
| -0.120537656 | 0.954483 | -0.09875 |
| -0.346358134 | 0.850098 | -0.24847 |
| 0.244991618  | 0.899092 | 0.16627  |
| -0.309567948 | 0.995565 | 0.00962  |
| -0.840933514 | 0.989977 | -0.0208  |
| -0.376135169 | 0.978625 | 0.02851  |
| -1.734992216 | 0.788692 | -0.39409 |
| -0.422637344 | 0.963369 | 0.07069  |
| -0.981263437 | 0.860039 | -0.26303 |
| -0.694808281 | 0.87152  | -0.25439 |
| -0.769180219 | 0.822125 | -0.33106 |
| -1.440572591 | 0.883337 | -0.24793 |
| 0.479724468  | 0.89453  | 0.2603   |
| -0.303924285 | 0.961141 | -0.06899 |
| -0.219781208 | 0.835124 | 0.2578   |
| -0.488445831 | 0.965343 | 0.06714  |
| -0.280607035 | 0.978734 | -0.03337 |
| -0.321312742 | 0.970694 | 0.05554  |
| -0.280181266 | 0.918862 | -0.19426 |
| -0.445387535 | 0.95562  | 0.06626  |
| -1.253943182 | 0.962262 | -0.06804 |



|              |          |          |
|--------------|----------|----------|
| -1.684067554 | 0.82564  | -0.30946 |
| -0.370026346 | 0.992368 | -0.01567 |
| -0.009238207 | 0.931334 | 0.10932  |
| -0.883675882 | 0.726546 | -0.27854 |
| -0.405594508 | 0.992779 | 0.0117   |
| -0.634090551 | 0.852714 | -0.31167 |
| -0.506485125 | 0.975007 | 0.03968  |
| -0.262755651 | 0.804555 | 0.24943  |
| -0.361399536 | 0.98026  | 0.04041  |
| -0.220915309 | 0.914783 | -0.21028 |
| -0.223156977 | 0.982885 | -0.04091 |
| -0.391120993 | 0.859521 | -0.33167 |
| -0.415037499 | 0.936955 | -0.12553 |
| -0.507595383 | 0.927005 | -0.1349  |
| -0.355333292 | 0.965898 | 0.06623  |
| -0.368332478 | 0.974232 | -0.04596 |
| 0.143990909  | 0.672228 | 0.68982  |
| -2.460801916 | 0.820942 | -0.34842 |
| -0.558681698 | 0.985819 | 0.02595  |
| -0.294719241 | 0.97703  | -0.0464  |
| -0.455864533 | 0.935821 | 0.11949  |
| -0.445411148 | 0.954906 | 0.07419  |
| -0.556648901 | 0.943122 | -0.11619 |
| -0.273151861 | 0.84049  | 0.15464  |
| -0.618268587 | 0.847203 | -0.34303 |
| -0.212699025 | 0.819048 | 0.29457  |
| -0.40902805  | 0.950538 | -0.11268 |
| -0.193546481 | 0.91912  | -0.18686 |
| -0.394001909 | 0.950399 | 0.08473  |
| -0.227541311 | 0.943188 | -0.1363  |
| -4.026348441 | 0.28103  | -1.79697 |
| -1.932184616 | 0.509165 | -1.02333 |
| -2.337140838 | 0.330591 | -1.98373 |
| -0.247451871 | 0.819085 | 0.23963  |
| -0.553492162 | 0.95218  | -0.09406 |
| -0.611644543 | 1        | 0        |
| -0.54182142  | 0.91424  | 0.07666  |
| -0.265694605 | 0.997891 | 0.0049   |
| -0.440612534 | 0.958366 | -0.06228 |
| -0.306821497 | 0.990682 | 0.01929  |
| -0.457797983 | 0.903284 | -0.21686 |
| -0.641912242 | 0.541965 | 0.31753  |
| -0.438815885 | 0.990017 | -0.01546 |
| 0.105778264  | 0.91935  | 0.15706  |
| 0.113956189  | 0.888632 | 0.24202  |
| 0.185214872  | 0.693111 | 0.41009  |
| -0.691357191 | 0.971993 | 0.03917  |
| -0.277436586 | 0.997854 | 0.00453  |
| -0.640149422 | 0.933294 | -0.12394 |
| -0.364144644 | 0.984696 | 0.02959  |
| -0.045459001 | 0.920204 | 0.12592  |
| -0.394197156 | 0.931173 | -0.15232 |
| 0.738325986  | 0.968345 | 0.08372  |
| -0.546846534 | 0.990425 | -0.01262 |
| 0.255572948  | 0.950819 | 0.11175  |
| -0.423001823 | 0.932839 | -0.14629 |

|              |          |          |
|--------------|----------|----------|
| -0.99496441  | 0.698719 | -0.60222 |
| -0.375682405 | 0.927533 | 0.11991  |
| -0.43549429  | 0.91268  | 0.12696  |
| -0.262609521 | 0.99806  | 0.00354  |
| -0.390640845 | 0.869464 | 0.17266  |
| -0.700852211 | 0.911168 | -0.17426 |
| -0.032633779 | 0.985428 | -0.03394 |
| -0.465194174 | 0.900135 | -0.23247 |
| -0.465469987 | 0.893217 | -0.25262 |
| -0.288989752 | 0.965619 | 0.07091  |
| -0.430320034 | 0.993711 | 0.01034  |
| -0.271678792 | 0.905461 | 0.1327   |
| -0.500978132 | 0.987313 | 0.02298  |
| -0.239821904 | 0.947463 | 0.10679  |
| -0.354798077 | 0.929256 | -0.11974 |
| -0.440952198 | 0.907167 | 0.14881  |
| -1.438121112 | 0.70991  | -0.69188 |
| -0.74711355  | 0.899871 | -0.16404 |
| -0.242677126 | 0.994557 | -0.0113  |
| 0.111140719  | 0.707163 | -0.7071  |
| -0.55451545  | 0.960106 | -0.07274 |
| -1.373288517 | 0.973103 | 0.04779  |
| 0.178588068  | 0.862068 | 0.30729  |
| -0.256388448 | 0.927329 | 0.13224  |
| -0.1617683   | 0.97872  | 0.03696  |
| -0.679599375 | 0.867505 | 0.18691  |
| -0.27907946  | 0.969229 | -0.06622 |
| 0.098761072  | 0.981569 | 0.04122  |
| -0.333781102 | 0.949185 | -0.10588 |
| -0.024703954 | 0.953798 | -0.11539 |
| -0.17865313  | 0.935633 | -0.14376 |
| #DIV/0!      | ?        | #DIV/0!  |
| 2.807354922  | 0.426218 | 2.39855  |
| -1.433400433 | 0.864102 | -0.20096 |
| -0.174522713 | 0.986252 | -0.02825 |
| -0.189572244 | 0.807127 | 0.26707  |
| -0.456367527 | 0.928271 | -0.13431 |
| -0.150969919 | 0.916083 | 0.17994  |
| -0.292568847 | 0.961672 | 0.08125  |
| -0.298023758 | 0.980588 | -0.03989 |
| -0.741150961 | 0.878571 | -0.23969 |
| -0.968901808 | 0.886864 | -0.24612 |
| -0.41561354  | 0.881601 | 0.22363  |
| -0.480355838 | 0.9741   | -0.05473 |
| -0.330511545 | 0.75117  | 0.15932  |
| -0.437318947 | 0.935037 | -0.12414 |
| -0.502094234 | 0.932721 | -0.15122 |
| -0.421425502 | 0.905972 | 0.18182  |
| -0.363380127 | 0.927606 | -0.17454 |
| -0.423673025 | 0.860132 | 0.17829  |
| -0.59208807  | 0.977629 | 0.04692  |
| -0.216635428 | 0.964424 | -0.07022 |
| -0.348787555 | 0.929841 | -0.15081 |
| -0.16555096  | 0.99367  | -0.01344 |
| -0.196932436 | 0.915279 | 0.15798  |
| -0.156771109 | 0.87239  | 0.22279  |

|              |           |          |
|--------------|-----------|----------|
| -0.307224147 | 0.88412   | 0.195    |
| -0.303854899 | 0.959407  | 0.0661   |
| -0.400708806 | 0.932276  | -0.14883 |
| -1.807354922 | 0.685038  | -0.48543 |
| -0.452471404 | 0.977316  | 0.03598  |
| -0.428905758 | 0.927216  | 0.11957  |
| -0.187860015 | 0.849683  | -0.33527 |
| -0.512206158 | 0.869602  | -0.26802 |
| -1.259177667 | 0.927809  | 0.14738  |
| -0.733606582 | 0.605551  | 0.96941  |
| -0.130574236 | 0.924955  | 0.14214  |
| -0.438378721 | 0.853856  | -0.34638 |
| -0.573095913 | 0.857193  | 0.20235  |
| -0.227510181 | 0.959603  | -0.09502 |
| 0.044007182  | 0.923023  | -0.16605 |
| -1.040772516 | 0.80163   | -0.10516 |
| -0.299108616 | 0.987539  | 0.01944  |
| -0.449525437 | 0.977548  | 0.03519  |
| 0.032240615  | 0.965051  | 0.0841   |
| #DIV/0!      | ?         | #DIV/0!  |
| 0.611434712  | 0.587247  | 1.00998  |
| 0.874469118  | 0.487755  | 1.41504  |
| -0.902619888 | 0.936463  | 0.11092  |
| -2.137503524 | 0.562205  | -1       |
| -1.700439718 | 0.54742   | -1.37851 |
| 1.157541277  | 0.787586  | 0.42884  |
| -0.447458977 | 0.789102  | -0.32193 |
| #DIV/0!      | 0.0917211 | #DIV/0!  |
| -3.429392792 | 0.272438  | -1.34533 |
| -0.195121154 | 0.972681  | 0.05318  |
| -0.351672417 | 0.980017  | -0.0391  |
| -0.353978151 | 0.850646  | -0.34603 |
| -0.311414868 | 0.804365  | 0.23331  |
| -0.222392421 | 0.992928  | -0.01217 |
| -0.352870692 | 0.996407  | 0.0068   |
| -0.470455222 | 0.923635  | 0.13969  |
| -0.212989285 | 0.861586  | 0.20311  |
| -0.285473219 | 0.991505  | 0.01582  |
| -0.617034391 | 0.900757  | -0.17708 |
| -0.461452936 | 0.922272  | -0.11569 |
| -0.338581723 | 0.954085  | 0.09095  |
| -0.462413832 | 0.944985  | 0.0938   |
| -0.523124808 | 0.967887  | -0.0563  |
| -0.501135128 | 0.907823  | -0.21387 |
| -0.371472123 | 0.926801  | -0.15361 |

| Transcript_id | Gene description                                                                   | Gene symbol      |
|---------------|------------------------------------------------------------------------------------|------------------|
| ENSGALT0000   | chemokine (C-C motif) receptor 2                                                   | CCR2             |
| ENSGALT0000   | NADPH oxidase 3                                                                    | NOX3             |
| ENSGALT0000   | transmembrane protease, serine 3                                                   | TMPRSS3          |
| ENSGALT0000   | transmembrane channel-like 2                                                       | TMC2             |
| ENSGALT0000   | Olfactory receptor OR24                                                            | ENSGALG000000224 |
| ENSGALT0000   | otolin 1                                                                           | OTOL1            |
| ENSGALT0000   | gastrulation brain homeobox 2                                                      | GBX2             |
| ENSGALT0000   | oncomodulin 2                                                                      | OCM2             |
| ENSGALT0000   | seven in absentia homolog 3 (Drosophila)                                           | SIAH3            |
| ENSGALT0000   | cholinergic receptor, nicotinic, alpha 9                                           | CHRNA9           |
| ENSGALT0000   | carboxypeptidase B1 (tissue)                                                       | CPB1             |
| ENSGALT0000   | carbonic anhydrase XII                                                             | CA12             |
| ENSGALT0000   | RAP2B, member of RAS oncogene family                                               | RAP2B            |
| ENSGALT0000   | doublecortin domain containing 2                                                   | DCDC2            |
| ENSGALT0000   | alkylglycerol monooxygenase                                                        | AGMO             |
| ENSGALT0000   | Rh family, C glycoprotein                                                          | RHCG             |
| ENSGALT0000   | coagulation factor IX                                                              | F9               |
| ENSGALT0000   | potassium channel, subfamily K, member 13                                          | KCNK13           |
| ENSGALT0000   | myosin, heavy chain 4, skeletal muscle                                             | MYH4             |
| ENSGALT0000   | Zic family member 1                                                                | ZIC1             |
| ENSGALT0000   | aldehyde dehydrogenase 1 family, member A3                                         | ALDH1A3          |
| ENSGALT0000   | wingless-type MMTV integration site family, member 2B                              | WNT2B            |
| ENSGALT0000   | glycine receptor, alpha 3                                                          | GLRA3            |
| ENSGALT0000   | glutamate receptor, ionotropic, kainate 3                                          | GRIK3            |
| ENSGALT0000   | growth differentiation factor 9                                                    | GDF9             |
| ENSGALT0000   | solute carrier family 9 (sodium/hydrogen exchanger), member 9                      | SLC9A3           |
| ENSGALT0000   | proopiomelanocortin                                                                | POMC             |
| ENSGALT0000   | ankyrin repeat and SOCS box containing 2                                           | ASB2             |
| ENSGALT0000   | Protein Wnt                                                                        | F1NVM5_CHICK     |
| ENSGALT0000   | Agouti signaling protein                                                           | ASIP             |
| ENSGALT0000   | Uncharacterized protein                                                            |                  |
| ENSGALT0000   | potassium channel, subfamily K, member 17                                          | KCNK17           |
| ENSGALT0000   | nodal homolog (mouse)                                                              | NODAL            |
| ENSGALT0000   | pappalysin 2                                                                       | PAPPA2           |
| ENSGALT0000   | dopamine beta-hydroxylase (dopamine beta-monooxygenase)                            | DBH              |
| ENSGALT0000   | transmembrane protein 114                                                          | TMEM114          |
| ENSGALT0000   | 5-hydroxytryptamine (serotonin) receptor 1E                                        | HTR1E            |
| ENSGALT0000   | serine/threonine kinase 32A                                                        | STK32A           |
| ENSGALT0000   | myosin, heavy chain 2, skeletal muscle, adult                                      | MYH2             |
| ENSGALT0000   | collagen-like tail subunit (single strand of homotrimer) of alpha 2(I) procollagen | COLQ             |
| ENSGALT0000   | G protein-coupled receptor 144                                                     | GPR144           |
| ENSGALT0000   | solute carrier family 23 (nucleobase transporters), member 3                       | SLC23A3          |
| ENSGALT0000   | zona pellucida-like domain containing 1                                            | ZPLD1            |
| ENSGALT0000   | Potassium voltage-gated channel subfamily A member 10                              | KCNA10           |
| ENSGALT0000   | G protein-coupled receptor 17                                                      | GPR17            |
| ENSGALT0000   | calbindin 2                                                                        | CALB2            |
| ENSGALT0000   | bone morphogenetic protein 3                                                       | BMP3             |
| ENSGALT0000   | coiled-coil domain containing 3                                                    | CCDC3            |

|                                                                             |             |
|-----------------------------------------------------------------------------|-------------|
| ENSGALT0000 neurogenic differentiation 1                                    | NEUROD1     |
| ENSGALT0000 interleukin 12B (natural killer cell stimulatory factor 2, cyto | IL12B       |
| ENSGALT0000 viral interleukin-8 homolog                                     | LOC422509   |
| ENSGALT0000 photopigment melanopsin-like                                    | OPN4-1      |
| ENSGALT0000 phospholipase A2, group IVE                                     | PLA2G4E     |
| ENSGALT0000 transcription factor EC                                         | TFEC        |
| ENSGALT0000 klotho                                                          | KL          |
| ENSGALT0000 tyrosine aminotransferase                                       | TAT         |
| ENSGALT0000 NeuroM protein                                                  | NEUROD4     |
| ENSGALT0000 solute carrier family 5 (iodide transporter), member 8          | SLC5A8      |
| ENSGALT0000 SKI family transcriptional corepressor 1                        | SKOR1       |
| ENSGALT0000 vasoactive intestinal peptide                                   | VIP         |
| ENSGALT0000 espin-like                                                      | ESPNL       |
| ENSGALT0000 arginine vasopressin receptor 1B                                | AVPR1B      |
| ENSGALT0000 TENP protein                                                    | TENP        |
| ENSGALT0000 chromosome 14 open reading frame, human C16orf79                | C14H16orf79 |
| ENSGALT0000 membrane-associated ring finger (C3HC4) 11                      | MARCH11     |
| ENSGALT0000 mesenchyme homeobox 2                                           | MEOX2       |
| ENSGALT0000 epidermal growth factor                                         | EGF         |
| ENSGALT0000 potassium channel, subfamily K, member 10                       | KCNK10      |
| ENSGALT0000 IQ motif containing J                                           | IQCJ        |
| ENSGALT0000 hydroxyprostaglandin dehydrogenase 15-(NAD)                     | HPGD        |
| ENSGALT0000 ADAM metallopeptidase domain 19                                 | ADAM19      |
| ENSGALT0000 opsin 5-like 2                                                  | COPN5L2     |
| ENSGALT0000 growth differentiation factor 2                                 | GDF2        |
| ENSGALT0000 chromogranin A (parathyroid secretory protein 1)                | CHGA        |
| ENSGALT0000 NADPH oxidase organizer 1                                       | NOXO1       |
| ENSGALT0000 neuronal pentraxin I                                            | NPTX1       |
| ENSGALT0000 protein NDNF-like                                               | LOC423605   |
| ENSGALT0000 T-cell activation RhoGTPase activating protein                  | TAGAP       |
| ENSGALT0000 calsequestrin 2 (cardiac muscle)                                | CASQ2       |
| ENSGALT0000 neuron-specific protein family member 2-like                    | LOC416212   |
| ENSGALT0000 cathelicidin antimicrobial peptide                              | CAMP        |
| ENSGALT0000 urotensin 2 domain containing                                   | UTS2D       |
| ENSGALT0000 nescient helix loop helix 1                                     | NHLH1       |
| ENSGALT0000 PR domain containing 14                                         | PRDM14      |
| ENSGALT0000 tetra-peptide repeat homeobox-like                              | TPRXL       |
| ENSGALT0000 thyrotropin-releasing hormone receptor                          | TRHR        |
| ENSGALT0000 family with sequence similarity 5, member B                     | FAM5B       |
| ENSGALT0000 solute carrier family 7 (orphan transporter), member 14         | SLC7A14     |
| ENSGALT0000 wingless-type MMTV integration site family, member 16           | WNT16       |
| ENSGALT0000 T-cell leukemia homeobox 3                                      | TLX3        |
| ENSGALT0000 suppression of tumorigenicity 18 (breast carcinoma) (zinc       | ST18        |
| ENSGALT0000 carboxypeptidase A6                                             | CPA6        |
| ENSGALT0000 regulator of G-protein signaling 4                              | RGS4        |
| ENSGALT0000 kelch repeat and BTB (POZ) domain containing 5                  | KBTBD5      |
| ENSGALT0000 secretagogen, EF-hand calcium binding protein                   | SCGN        |
| ENSGALT0000 anoctamin 4                                                     | ANO4        |

|                                                                                       |            |
|---------------------------------------------------------------------------------------|------------|
| ENSGALT0000 fibronectin type III domain containing 1                                  | FNDC1      |
| ENSGALT0000 hypocretin (orexin) receptor 2                                            | HCRTR2     |
| ENSGALT0000 ovostatin                                                                 | LOC396151  |
| ENSGALT0000 regucalcin-like                                                           | LOC428008  |
| ENSGALT0000 regulatory factor X, 4 (influences HLA class II expression)               | RFX4       |
| ENSGALT0000 serpin peptidase inhibitor, clade B (ovalbumin), member 1                 | SERPINB10  |
| ENSGALT0000 dachsous 2 (Drosophila)                                                   | DCHS2      |
| ENSGALT0000 membrane-associated ring finger (C3HC4) 3                                 | MARCH3     |
| ENSGALT0000 protein phosphatase 1, regulatory subunit 17                              | PPP1R17    |
| ENSGALT0000 carboxymethylenebutenolidase homolog (Pseudomonas)                        | CMBL       |
| ENSGALT0000 kelch-like 30 (Drosophila)                                                | KLHL30     |
| ENSGALT0000 scavenger receptor class A, member 5 (putative)                           | SCARA5     |
| ENSGALT0000 potassium voltage-gated channel, KQT-like subfamily, member 5             | KCNQ5      |
| ENSGALT0000 flavin containing monooxygenase 4                                         | FMO4       |
| ENSGALT0000 selectin E (endothelial adhesion molecule 1)                              | SELE       |
| ENSGALT0000 transglutaminase 4 (prostate)                                             | TGM4       |
| ENSGALT0000 solute carrier family 38, member 4                                        | SLC38A4    |
| ENSGALT0000 cystine/glutamate transporter-like 1                                      | LOC418109  |
| ENSGALT0000 potassium voltage-gated channel, delayed-rectifier, subfamily A, member 2 | KCNS2      |
| ENSGALT0000 cholinergic receptor, nicotinic, alpha 4                                  | CHRNA4     |
| ENSGALT0000 crumbs homolog 1 (Drosophila)                                             | CRB1       |
| ENSGALT0000 cholinergic receptor, nicotinic, alpha 10                                 | CHRNA10    |
| ENSGALT0000 shroom family member 1                                                    | SHROOM1    |
| ENSGALT0000 Gal 5                                                                     | GAL5       |
| ENSGALT0000 ankyrin repeat and kinase domain containing 1                             | ANKK1      |
| ENSGALT0000 chromosome Z open reading frame, human C9orf24                            | CZH9orf24  |
| ENSGALT0000 fibrinogen-like 2                                                         | FGL2       |
| ENSGALT0000 glutaredoxin                                                              | GLRX       |
| ENSGALT0000 UDP glucuronosyltransferase 2 family, polypeptide A3                      | UGT2A3     |
| ENSGALT0000 2-hydroxyacylsphingosine 1-beta-galactosyltransferase-like 1              | LOC428949  |
| ENSGALT0000 Angiogenin                                                                | RSFR_CHICK |
| ENSGALT0000 aldo-keto reductase family 1, member D1 (delta 4-3-ketoreductase)         | AKR1D1     |
| ENSGALT0000 transmembrane protein 45A                                                 | TMEM45A    |
| ENSGALT0000 collagen, type XX, alpha 1                                                | COL20A1    |
| ENSGALT0000 guanine nucleotide binding protein (G protein), gamma 13                  | GNG13      |
| ENSGALT0000 glycoprotein hormones, alpha polypeptide                                  | CGA        |
| ENSGALT0000 LIM domain binding 3                                                      | LDB3       |
| ENSGALT0000 SPARC related modular calcium binding 1                                   | SMOC1      |
| ENSGALT0000 ISG12-2 protein-like                                                      | ISG12-2    |
| ENSGALT0000 interleukin 21 receptor                                                   | IL21R      |
| ENSGALT0000 EPH receptor A8                                                           | EPHA8      |
| ENSGALT0000 5-hydroxytryptamine (serotonin) receptor 6, G protein-coupled             | HTR6       |
| ENSGALT0000 SPHK1 interactor, AKAP domain containing                                  | SPHKAP     |
| ENSGALT0000 endothelin receptor type B                                                | EDNRB      |
| ENSGALT0000 family with sequence similarity 70, member B                              | FAM70B     |
| ENSGALT0000 neuronal pentraxin II                                                     | NPTX2      |
| ENSGALT0000 zinc finger protein, multitype 2                                          | ZFPM2      |
| ENSGALT0000 caveolin 3                                                                | CAV3       |

|                                                                                   |           |
|-----------------------------------------------------------------------------------|-----------|
| ENSGALT0000 xanthine dehydrogenase                                                | XDH       |
| ENSGALT0000 melanocortin 1 receptor                                               | MC1R      |
| ENSGALT0000 BPI fold containing family B, member 3                                | BPIFB3    |
| ENSGALT0000 WDFY family member 4                                                  | WDFY4     |
| ENSGALT0000 neuralized homolog 1B (Drosophila)                                    | NEURL1B   |
| ENSGALT0000 neurexophilin 3                                                       | NXPH3     |
| ENSGALT0000 neuritin 1                                                            | NRN1      |
| ENSGALT0000 H6 family homeobox 1                                                  | HMX1      |
| ENSGALT0000 solute carrier family 6 (neurotransmitter transporter, GABA)          | SLC6A1    |
| ENSGALT0000 MAM domain containing glycosylphosphatidylinositol anchor             | MDGA1     |
| ENSGALT0000 amylase, alpha 2A; pancreatic                                         | AMY2A     |
| ENSGALT0000 leucine-rich repeats and immunoglobulin-like domains 1                | LRIG1     |
| ENSGALT0000 olfactomedin-like 2B                                                  | OLFML2B   |
| ENSGALT0000 actin, alpha 2, smooth muscle, aorta                                  | ACTA2     |
| ENSGALT0000 osteoglycin                                                           | OGN       |
| ENSGALT0000 phospholipase A2, group IIA (platelets, synovial fluid)               | PLA2G2A   |
| ENSGALT0000 G protein-coupled receptor 22                                         | GPR22     |
| ENSGALT0000 Zic family member 5                                                   | ZIC5      |
| ENSGALT0000 kelch-like 35 (Drosophila)                                            | KLHL35    |
| ENSGALT0000 Rap guanine nucleotide exchange factor (GEF) 5                        | RAPGEF5   |
| ENSGALT0000 adhesion molecule with Ig-like domain 2                               | AMIGO2    |
| ENSGALT0000 cellular retinoic acid binding protein 1                              | CRABP1    |
| ENSGALT0000 BCL2-like 14 (apoptosis facilitator)                                  | BCL2L14   |
| ENSGALT0000 hyperpolarization activated cyclic nucleotide-gated potassium channel | HCN1      |
| ENSGALT0000 bactericidal permeability-increasing protein-like                     | LOC419276 |
| ENSGALT0000 5'-nucleotidase, ecto (CD73)                                          | NT5E      |
| ENSGALT0000 RASD family, member 2                                                 | RASD2     |
| ENSGALT0000 tripartite motif containing 29                                        | TRIM29    |
| ENSGALT0000 collagen, type XV, alpha 1                                            | COL15A1   |
| ENSGALT0000 aldolase B, fructose-bisphosphate                                     | ALDOB     |
| ENSGALT0000 protein kinase (cAMP-dependent, catalytic) inhibitor gamma            | PKIG      |
| ENSGALT0000 histone H3.2-like                                                     | LOC417953 |
| ENSGALT0000 solute carrier family 17 (sodium-dependent inorganic phosphate)       | SLC17A6   |
| ENSGALT0000 receptor-interacting serine-threonine kinase 2-like                   | LOC415708 |
| ENSGALT0000 ovoinhibitor                                                          | LOC416235 |
| ENSGALT0000 calcium/calmodulin-dependent protein kinase ID                        | CAMK1D    |
| ENSGALT0000 BAI1-associated protein 2-like 2                                      | BAIAP2L2  |
| ENSGALT0000 proteolipid protein 1                                                 | PLP1      |
| ENSGALT0000 regulator of G-protein signaling 5                                    | RGS5      |
| ENSGALT0000 fatty acid binding protein 7, brain                                   | FABP7     |
| ENSGALT0000 Type-1 angiotensin II receptor                                        | AGTR1     |
| ENSGALT0000 T-box 22                                                              | TBX22     |
| ENSGALT0000 matrix metalloproteinase 28                                           | MMP28     |
| ENSGALT0000 \N                                                                    | MAB21L2   |
| ENSGALT0000 transmembrane 4 L six family member 4                                 | TM4SF4    |
| ENSGALT0000 pleiotrophin                                                          | PTN       |
| ENSGALT0000 membrane metallo-endopeptidase-like 1                                 | MMEL1     |
| ENSGALT0000 glycoprotein M6A                                                      | GPM6A     |

|                                                                                      |                  |
|--------------------------------------------------------------------------------------|------------------|
| ENSGALT0000 Putative uncharacterized protein                                         | ENSGALG000000226 |
| ENSGALT0000 forkhead box protein L1-like                                             | LOC427656        |
| ENSGALT0000 G protein-coupled receptor 98                                            | GPR98            |
| ENSGALT0000 doublesex and mab-3 related transcription factor 1                       | DMRT1            |
| ENSGALT0000 matrix metalloproteinase 9 (gelatinase B, 92kDa gelatinase               | MMP9             |
| ENSGALT0000 aspartate beta-hydroxylase domain containing 2                           | ASPHD2           |
| ENSGALT0000 chromosome 11 open reading frame 87                                      | C11orf87         |
| ENSGALT0000 four and a half LIM domains 2                                            | FHL2             |
| ENSGALT0000 piggyBac transposable element derived 5                                  | PGBD5            |
| ENSGALT0000 forkhead box E3                                                          | FOXE3            |
| ENSGALT0000 B and T lymphocyte associated                                            | BTLA             |
| ENSGALT0000 leukocyte cell-derived chemotaxin 2                                      | LECT2            |
| ENSGALT0000 avidin-like                                                              | LOC431660        |
| ENSGALT0000 R-spondin 1                                                              | RSPO1            |
| ENSGALT0000 integrin, alpha 11                                                       | ITGA11           |
| ENSGALT0000 eyes shut homolog (Drosophila)                                           | EYS              |
| ENSGALT0000 angiotensinogen (serpin peptidase inhibitor, clade A, men                | AGT              |
| ENSGALT0000 paired-like homeodomain 3                                                | PITX3            |
| ENSGALT0000 glutamate receptor, ionotropic, N-methyl D-aspartate 1                   | GRIN1            |
| ENSGALT0000 family with sequence similarity 198, member A                            | FAM198A          |
| ENSGALT0000 fibroblast growth factor 13                                              | FGF13            |
| ENSGALT0000 extracellular leucine-rich repeat and fibronectin type III do            | ELFN2            |
| ENSGALT0000 Cytokine-inducible SH2-containing protein                                | CISH             |
| ENSGALT0000 glycine amidinotransferase (L-arginine:glycine amidinotra                | GATM             |
| ENSGALT0000 adenomatosis polyposis coli down-regulated 1-like                        | APCDD1L          |
| ENSGALT0000 ectodermal-neural cortex 1 (with BTB-like domain)                        | ENC1             |
| ENSGALT0000 adenylate cyclase activating polypeptide 1 (pituitary)                   | ADCYAP1          |
| ENSGALT0000 solute carrier family 13 (sodium-dependent dicarboxylate                 | SLC13A2          |
| ENSGALT0000 early B-cell factor 2                                                    | EBF2             |
| ENSGALT0000 zona pellucida glycoprotein 4                                            | ZP4              |
| ENSGALT0000 carbonic anhydrase II                                                    | CA2              |
| ENSGALT0000 teashirt zinc finger homeobox 2                                          | TSHZ2            |
| ENSGALT0000 unc-5 homolog D (C. elegans)                                             | UNC5D            |
| ENSGALT0000 carboxypeptidase Z                                                       | CPZ              |
| ENSGALT0000 BET3 like (S. cerevisiae)                                                | BET3L            |
| ENSGALT0000 formin 2                                                                 | FMN2             |
| ENSGALT0000 galanin receptor 1                                                       | GALR1            |
| ENSGALT0000 myosin binding protein C, slow type                                      | MYBPC1           |
| ENSGALT0000 solute carrier family 30 (zinc transporter), member 2                    | SLC30A2          |
| ENSGALT0000 ripply2 homolog (zebrafish)                                              | RIPPLY2          |
| ENSGALT0000 leucine rich repeat transmembrane neuronal 3                             | LRRTM3           |
| ENSGALT0000 CD8a molecule                                                            | CD8A             |
| ENSGALT0000 catenin (cadherin-associated protein), alpha 3                           | CTNNA3           |
| ENSGALT0000 leucine rich repeat and fibronectin type III domain contain              | LRFN2            |
| ENSGALT0000 glutaredoxin, cysteine rich 1                                            | GRXCR1           |
| ENSGALT0000 UDP-N-acetyl-alpha-D-galactosamine:polypeptide N-acet                    | GALNT14          |
| ENSGALT0000 cannabinoid receptor interacting protein 1                               | CNRIP1           |
| ENSGALT0000 ATPase, Na <sup>+</sup> /K <sup>+</sup> transporting, beta 1 polypeptide | ATP1B1           |



|                                                                               |           |
|-------------------------------------------------------------------------------|-----------|
| ENSGALT0000 janus kinase and microtubule interacting protein 1                | JAKMIP1   |
| ENSGALT0000 pleckstrin homology domain containing, family O member            | PLEKHO1   |
| ENSGALT0000 retinoschisin 1                                                   | RS1       |
| ENSGALT0000 dopamine receptor D1                                              | DRD1      |
| ENSGALT0000 inositol polyphosphate phosphatase-like 1                         | INPPL1    |
| ENSGALT0000 aquaporin 4                                                       | AQP4      |
| ENSGALT0000 tumor protein p53 inducible protein 11                            | TP53I11   |
| ENSGALT0000 coagulation factor VII (serum prothrombin conversion acc          | F7        |
| ENSGALT0000 transmembrane protein 74                                          | TMEM74    |
| ENSGALT0000 cadherin 20, type 2                                               | CDH20     |
| ENSGALT0000 transcription factor AP-2 alpha (activating enhancer bindir       | TFAP2A    |
| ENSGALT0000 cytochrome P450 2J2-like                                          | LOC424944 |
| ENSGALT0000 purinergic receptor P2Y, G-protein coupled, 13                    | P2RY13    |
| ENSGALT0000 gamma-aminobutyric acid (GABA) A receptor, alpha 3                | GABRA3    |
| ENSGALT0000 ATP-binding cassette, sub-family A (ABC1), member 8               | ABCA8     |
| ENSGALT0000 heme binding protein 2                                            | HEBP2     |
| ENSGALT0000 SH3 domain binding glutamic acid-rich protein                     | SH3BGR    |
| ENSGALT0000 ceramide kinase-like                                              | CERKL     |
| ENSGALT0000 Na <sup>+</sup> /K <sup>+</sup> transporting ATPase interacting 4 | NKAIN4    |
| ENSGALT0000 KIAA1045                                                          | KIAA1045  |
| ENSGALT0000 potassium voltage-gated channel, subfamily G, member 1            | KCNG1     |
| ENSGALT0000 lumican                                                           | LUM       |
| ENSGALT0000 glutamate receptor, ionotropic, AMPA 1                            | GRIA1     |
| ENSGALT0000 endothelial PAS domain protein 1                                  | EPAS1     |
| ENSGALT0000 ST8 alpha-N-acetyl-neuraminide alpha-2,8-sialyltransfera          | ST8SIA3   |
| ENSGALT0000 protein phosphatase 2, regulatory subunit B, gamma                | PPP2R2C   |
| ENSGALT0000 ADP-ribosylhydrolase like 1                                       | ADPRHL1   |
| ENSGALT0000 met proto-oncogene (hepatocyte growth factor receptor)            | MET       |
| ENSGALT0000 myoglobin                                                         | MB        |
| ENSGALT0000 melanocortin 4 receptor                                           | MC4R      |
| ENSGALT0000 NFAT activating protein with ITAM motif 1                         | NFAM1     |
| ENSGALT0000 POU class 2 homeobox 3                                            | POU2F3    |
| ENSGALT0000 regenerating islet-derived family, member 4                       | REG4      |
| ENSGALT0000 Rh-associated glycoprotein                                        | RHAG      |
| ENSGALT0000 serpin peptidase inhibitor, clade B (ovalbumin), member 1         | SERPINB12 |
| ENSGALT0000 KIAA1755 ortholog                                                 | KIAA1755  |
| ENSGALT0000 calcium channel, voltage-dependent, gamma subunit 3               | CACNG3    |
| ENSGALT0000 regulator of G-protein signaling 2, 24kDa                         | RGS2      |
| ENSGALT0000 netrin 1                                                          | NTN1      |
| ENSGALT0000 transmembrane protein 132C                                        | TMEM132C  |
| ENSGALT0000 Rap guanine nucleotide exchange factor (GEF) 4                    | RAPGEF4   |
| ENSGALT0000 runt-related transcription factor 1; translocated to, 1 (cycli    | RUNX1T1   |
| ENSGALT0000 glutamyl aminopeptidase (aminopeptidase A)                        | ENPEP     |
| ENSGALT0000 MCF.2 cell line derived transforming sequence-like 2              | MCF2L2    |
| ENSGALT0000 Cas scaffolding protein family member 4                           | CASS4     |
| ENSGALT0000 gap junction protein, beta 1, 32kDa                               | GJB1      |
| ENSGALT0000 troponin T type 3 (skeletal, fast)                                | TNNT3     |
| ENSGALT0000 nucleolar protein 4                                               | NOL4      |

|                                                                           |              |
|---------------------------------------------------------------------------|--------------|
| ENSGALT0000 potassium inwardly-rectifying channel, subfamily J, memt      | KCNJ2        |
| ENSGALT0000 bone morphogenetic protein receptor, type IB                  | BMPR1B       |
| ENSGALT0000 ovomucin alpha-subunit                                        | MUC5B        |
| ENSGALT0000 mab-21-like 1 (C. elegans)                                    | MAB21L1      |
| ENSGALT0000 limbic system-associated membrane protein                     | LSAMP        |
| ENSGALT0000 collagen, type XIV, alpha 1                                   | COL14A1      |
| ENSGALT0000 follistatin-like 5                                            | FSTL5        |
| ENSGALT0000 leucine rich repeat neuronal 3                                | LRRN3        |
| ENSGALT0000 hemopoietic cell kinase                                       | HCK          |
| ENSGALT0000 mannose-binding lectin (protein C) 2, soluble                 | MBL2         |
| ENSGALT0000 Zic family member 3 heterotaxy 1 (odd-paired homolog, C       | ZIC3         |
| ENSGALT0000 sptA/ryanodine receptor domain and SOCS box containin         | SPSB4        |
| ENSGALT0000 neurotrophic tyrosine kinase, receptor, type 1                | NTRK1        |
| ENSGALT0000 ST8 alpha-N-acetyl-neuraminide alpha-2,8-sialyltransfera      | ST8SIA1      |
| ENSGALT0000 receptor-associated protein of the synapse                    | RAPSN        |
| ENSGALT0000 regulator of G-protein signaling 7                            | RGS7         |
| ENSGALT0000 corticotropin releasing hormone receptor 1                    | CRHR1        |
| ENSGALT0000 ectonucleoside triphosphate diphosphohydrolase 2-like         | LOC427773    |
| ENSGALT0000 organic solute transporter beta                               | OSTBETA      |
| ENSGALT0000 hemoglobin, alpha 1                                           | HBAA         |
| ENSGALT0000 potassium voltage-gated channel, subfamily H (eag-relate      | KCNH1        |
| ENSGALT0000 ELOVL fatty acid elongase 2                                   | ELOVL2       |
| ENSGALT0000 carbonic anhydrase X                                          | CA10         |
| ENSGALT0000 clavesin 2                                                    | CLVS2        |
| ENSGALT0000 multidrug resistance protein 1-like                           | LOC420606    |
| ENSGALT0000 secreted phosphoprotein 2, 24kDa                              | SPP2         |
| ENSGALT0000 synaptoporin                                                  | SYNPR        |
| ENSGALT0000 family with sequence similarity 69, member C                  | FAM69C       |
| ENSGALT0000 clusterin-like 1 (retinal)                                    | CLUL1        |
| ENSGALT0000 cholinergic receptor, nicotinic, alpha polypeptide 2 (neuro   | F1N9F1_CHICK |
| ENSGALT0000 ras-related C3 botulinum toxin substrate 2 (rho family, sm    | RAC2         |
| ENSGALT0000 Cbp/p300-interacting transactivator, with Glu/Asp-rich car    | CITED4       |
| ENSGALT0000 solute carrier family 29 (nucleoside transporters), membe     | SLC29A4      |
| ENSGALT0000 laminin, alpha 4                                              | LAMA4        |
| ENSGALT0000 CD36 antigen                                                  | CD36         |
| ENSGALT0000 pregnancy-associated plasma protein A, pappalysin 1           | PAPPA        |
| ENSGALT0000 D4, zinc and double PHD fingers, family 3                     | DPF3         |
| ENSGALT0000 follistatin-like 3 (secreted glycoprotein)                    | FSTL3        |
| ENSGALT0000 von Willebrand factor A domain containing 3A                  | VWA3A        |
| ENSGALT0000 fyn-related kinase                                            | FRK          |
| ENSGALT0000 RAS-like, family 10, member B                                 | RASL10B      |
| ENSGALT0000 solute carrier family 2 (facilitated glucose transporter), me | SLC2A2       |
| ENSGALT0000 ectonucleotide pyrophosphatase/phosphodiesterase 2            | ENPP2        |
| ENSGALT0000 leucine rich repeat containing 7                              | LRRC7        |
| ENSGALT0000 ATPase, H+ transporting, lysosomal accessory protein 1-1      | ATP6AP1L     |
| ENSGALT0000 solute carrier family 6 (neurotransmitter transporter, GAB/   | SLC6A11      |
| ENSGALT0000 anoctamin 6                                                   | ANO6         |
| ENSGALT0000 microfibrillar associated protein 5                           | MFAP5        |

|                                                                       |           |
|-----------------------------------------------------------------------|-----------|
| ENSGALT0000 hemoglobin, mu                                            | HBM       |
| ENSGALT0000 hemoglobin, beta                                          | HBE       |
| ENSGALT0000 hemoglobin, zeta                                          | HBZ       |
| ENSGALT0000 angiopoietin-like 6                                       | ANGPTL6   |
| ENSGALT0000 glutamate receptor, metabotropic 3                        | GRM3      |
| ENSGALT0000 RAS guanyl releasing protein 3 (calcium and DAG-regula    | RASGRP3   |
| ENSGALT0000 N-terminal EF-hand calcium binding protein 2              | NECAB2    |
| ENSGALT0000 cannabinoid receptor 1 (brain)                            | CNR1      |
| ENSGALT0000 sensory organ homeobox protein SOHo                       | SOHO-1    |
| ENSGALT0000 CUGBP, Elav-like family member 4                          | CELF4     |
| ENSGALT0000 adenylate cyclase 1 (brain)                               | ADCY1     |
| ENSGALT0000 myosin IA                                                 | MYO1A     |
| ENSGALT0000 complexin 2                                               | CPLX2     |
| ENSGALT0000 regulator of G-protein signaling 18                       | RGS18     |
| ENSGALT0000 zinc finger, CCHC domain containing 24                    | ZCCHC24   |
| ENSGALT0000 \N                                                        | LOC428834 |
| ENSGALT0000 thrombospondin, type I, domain containing 7A              | THSD7A    |
| ENSGALT0000 phosphatidylinositol-3,4,5-trisphosphate-dependent Rac ε  | PREX2     |
| ENSGALT0000 coactosin-like 1 (Dictyostelium)                          | COTL1     |
| ENSGALT0000 laminin, alpha 2                                          | LAMA2     |
| ENSGALT0000 connexin 39                                               | GJA4      |
| ENSGALT0000 potassium channel, subfamily K, member 2                  | KCNK2     |
| ENSGALT0000 ephrin-A5                                                 | EFNA5     |
| ENSGALT0000 mal, T-cell differentiation protein                       | MAL       |
| ENSGALT0000 patched domain containing 4                               | PTCHD4    |
| ENSGALT0000 zinc finger protein 750                                   | ZNF750    |
| ENSGALT0000 chromosome 2 open reading frame 40                        | C2orf40   |
| ENSGALT0000 growth regulation by estrogen in breast cancer 1          | GREB1     |
| ENSGALT0000 WD repeat domain 86                                       | WDR86     |
| ENSGALT0000 Forkhead box protein D3                                   | FOXD3     |
| ENSGALT0000 protein kinase, cGMP-dependent, type I                    | PRKG1     |
| ENSGALT0000 gap junction protein, alpha 5, 40kDa                      | GJA5      |
| ENSGALT0000 oxysterol binding protein-like 6                          | OSBPL6    |
| ENSGALT0000 N-acetylneuraminase pyruvate lyase (dihydrodipicolinate s | NPL       |
| ENSGALT0000 RAP1 GTPase activating protein 2                          | RAP1GAP2  |
| ENSGALT0000 PDZ and LIM domain 1                                      | PDLIM1    |
| ENSGALT0000 family with sequence similarity 176, member B             | FAM176B   |
| ENSGALT0000 elastin microfibril interfacer 3                          | EMILIN3   |
| ENSGALT0000 DEP domain containing 6                                   | DEPDC6    |
| ENSGALT0000 phospholipase B1                                          | PLB1      |
| ENSGALT0000 cholinergic receptor, nicotinic, alpha 1 (muscle)         | CHRNA1    |
| ENSGALT0000 forkhead box L2                                           | FOXL2     |
| ENSGALT0000 ATPase, aminophospholipid transporter, class I, type 8A,  | ATP8A2    |
| ENSGALT0000 family with sequence similarity 59, member B              | FAM59B    |
| ENSGALT0000 lipoma HMGIC fusion partner-like 2                        | LHFPL2    |
| ENSGALT0000 G protein-coupled receptor kinase 5                       | GRK5      |
| ENSGALT0000 TIMP metalloproteinase inhibitor 4                        | TIMP4     |
| ENSGALT0000 hemogen                                                   | HEMGN     |

|                                                                       |            |
|-----------------------------------------------------------------------|------------|
| ENSGALT0000 family with sequence similarity 131, member A             | FAM131A    |
| ENSGALT0000 SRY (sex determining region Y)-box 7                      | SOX7       |
| ENSGALT0000 ADAM metallopeptidase with thrombospondin type 1 motif    | ADAMTS10   |
| ENSGALT0000 sodium channel, voltage-gated, type V, alpha subunit      | SCN5A      |
| ENSGALT0000 hematopoietic prostaglandin D synthase                    | HPGDS      |
| ENSGALT0000 StAR-related lipid transfer (START) domain containing 10  | STARD10    |
| ENSGALT0000 argininosuccinate synthase 1                              | ASS1       |
| ENSGALT0000 phosphoglucomutase 2-like 1                               | PGM2L1     |
| ENSGALT0000 cadherin 10, type 2 (T2-cadherin)                         | CDH10      |
| ENSGALT0000 family with sequence similarity 19 (chemokine (C-C motif) | FAM19A4    |
| ENSGALT0000 sorting nexin 10                                          | SNX10      |
| ENSGALT0000 MAM domain containing 2                                   | MAMDC2     |
| ENSGALT0000 doublecortin-like kinase 3                                | DCLK3      |
| ENSGALT0000 ALX homeobox 4                                            | ALX4       |
| ENSGALT0000 Antimicrobial peptide CHP1                                | AMP1_CHICK |
| ENSGALT0000 ATPase, class V, type 10B                                 | ATP10B     |
| ENSGALT0000 cyclin-dependent kinase inhibitor 1A (p21, Cip1)          | CDKN1A     |
| ENSGALT0000 v-mos Moloney murine sarcoma viral oncogene homolog       | MOS        |
| ENSGALT0000 podocalyxin-like 2                                        | PODXL2     |
| ENSGALT0000 zinc finger, DHHC-type containing 17                      | ZDHHC17    |
| ENSGALT0000 pleckstrin homology-like domain, family A, member 2       | PHLDA2     |
| ENSGALT0000 Rho GTPase activating protein 31                          | ARHGAP31   |
| ENSGALT0000 POU class 6 homeobox 2                                    | POU6F2     |
| ENSGALT0000 GDP-mannose pyrophosphorylase B                           | GMPPB      |
| ENSGALT0000 Brain-specific homeobox/POU domain protein 3              | POU4F3     |
| ENSGALT0000 neurexin 1                                                | NRXN1      |
| ENSGALT0000 kelch-like 23 (Drosophila)                                | KLHL23     |
| ENSGALT0000 cholinergic receptor, muscarinic 2                        | CHRM2      |
| ENSGALT0000 vestigial like 3 (Drosophila)                             | VGLL3      |
| ENSGALT0000 GTP cyclohydrolase I feedback regulator                   | GCHFR      |
| ENSGALT0000 carbonic anhydrase XIII                                   | CA13       |
| ENSGALT0000 CUB domain containing protein 2                           | CDCP2      |
| ENSGALT0000 carbonic anhydrase III, muscle specific                   | CA3        |
| ENSGALT0000 interferon regulatory factor 1                            | IRF1       |
| ENSGALT0000 zona pellucida protein                                    | ZPAX       |
| ENSGALT0000 calcium binding protein 7                                 | CABP7      |
| ENSGALT0000 Dkk-1 Uncharacterized protein                             | DKK1       |
| ENSGALT0000 myosin XVIIIIB                                            | MYO18B     |
| ENSGALT0000 RAS-like, family 12                                       | RASL12     |
| ENSGALT0000 otokeratin                                                | LOC395772  |
| ENSGALT0000 complement component 5a receptor 1                        | C5AR1      |
| ENSGALT0000 B lymphoid tyrosine kinase                                | BLK        |
| ENSGALT0000 zinc finger E-box binding homeobox 2                      | ZEB2       |
| ENSGALT0000 cadherin-related 23                                       | CDH23      |
| ENSGALT0000 proenkephalin                                             | PENK       |
| ENSGALT0000 multimerin 1                                              | MMRN1      |
| ENSGALT0000 hemoglobin, epsilon 1                                     | HBE1       |
| ENSGALT0000 neuronal growth regulator 1                               | NEGR1      |

|                                                                         |           |
|-------------------------------------------------------------------------|-----------|
| ENSGALT0000 Src-like-adaptor                                            | SLA       |
| ENSGALT0000 monocyte to macrophage differentiation-associated 2         | MMD2      |
| ENSGALT0000 microtubule-associated protein 1B                           | MAP1B     |
| ENSGALT0000 basonuclein 2                                               | BNC2      |
| ENSGALT0000 cyclin-dependent kinase inhibitor 2C (p18, inhibits CDK4)   | CDKN2C    |
| ENSGALT0000 Meis homeobox 2                                             | MEIS2     |
| ENSGALT0000 glycine receptor, beta                                      | GLRB      |
| ENSGALT0000 Fas (TNF receptor superfamily, member 6)                    | FAS       |
| ENSGALT0000 collagen, type XII, alpha 1                                 | COL12A1   |
| ENSGALT0000 MOB kinase activator 3C                                     | MOB3C     |
| ENSGALT0000 glycine receptor, alpha 2                                   | GLRA2     |
| ENSGALT0000 homeobox A3                                                 | HOXA3     |
| ENSGALT0000 retinoid X receptor, gamma                                  | RXRG      |
| ENSGALT0000 copine VIII                                                 | CPNE8     |
| ENSGALT0000 SLIT and NTRK-like family, member 1                         | SLITRK1   |
| ENSGALT0000 G protein-coupled receptor 116                              | GPR116    |
| ENSGALT0000 myosin, light chain 4, alkali; atrial, embryonic            | MYL4      |
| ENSGALT0000 seizure related 6 homolog (mouse)-like                      | SEZ6L     |
| ENSGALT0000 beta-carotene oxygenase 2                                   | BCO2      |
| ENSGALT0000 T-box 4                                                     | TBX4      |
| ENSGALT0000 leucine rich repeat and fibronectin type III domain contain | LRFN5     |
| ENSGALT0000 sphingomyelin phosphodiesterase 3, neutral membrane (       | SMPD3     |
| ENSGALT0000 phosphodiesterase 1A, calmodulin-dependent                  | PDE1A     |
| ENSGALT0000 fibulin 5                                                   | FBLN5     |
| ENSGALT0000 neuromedin B                                                | NMB       |
| ENSGALT0000 potassium voltage-gated channel, Shal-related subfamily,    | KCND3     |
| ENSGALT0000 ADAM metalloproteinase domain 12                            | ADAM12    |
| ENSGALT0000 G protein-coupled receptor 149                              | GPR149    |
| ENSGALT0000 integrin, beta 2 (complement component 3 receptor 3 and     | ITGB2     |
| ENSGALT0000 complement component 1, q subcomponent, B chain             | C1QB      |
| ENSGALT0000 glutamate receptor, ionotropic, delta 1                     | GRID1     |
| ENSGALT0000 collapsin response mediator protein 1                       | CRMP1     |
| ENSGALT0000 DnaJ (Hsp40) homolog, subfamily C, member 5 beta            | DNAJC5B   |
| ENSGALT0000 endothelin receptor B subtype 2                             | EDNRB2    |
| ENSGALT0000 hemoglobin, gamma A                                         | HBG1      |
| ENSGALT0000 GRB2-associated binding protein 3                           | GAB3      |
| ENSGALT0000 UDP-Gal:betaGlcNAc beta 1,3-galactosyltransferase, pol      | B3GALT2   |
| ENSGALT0000 asparaginase homolog (S. cerevisiae)                        | ASPG      |
| ENSGALT0000 activating transcription factor 3                           | ATF3      |
| ENSGALT0000 hairy and enhancer of split 5 (Drosophila)                  | HES5      |
| ENSGALT0000 serine-rich and transmembrane domain containing 1           | SERTM1    |
| ENSGALT0000 glycine receptor, alpha 4                                   | GLRA4     |
| ENSGALT0000 ATPase, H+ transporting, lysosomal V0 subunit a4            | ATP6V0A4  |
| ENSGALT0000 complement component 1, q subcomponent, C chain             | C1QC      |
| ENSGALT0000 potassium voltage-gated channel, subfamily H (eag-relate    | KCNH7     |
| ENSGALT0000 adenylate cyclase activating polypeptide 1 (pituitary) rece | ADCYAP1R1 |
| ENSGALT0000 transforming growth factor, beta receptor II-like           | LOC424261 |
| ENSGALT0000 KIAA1486                                                    | KIAA1486  |

|                                                                          |           |
|--------------------------------------------------------------------------|-----------|
| ENSGALT0000 thrombospondin 1                                             | THBS1     |
| ENSGALT0000 erythrocyte membrane protein band 4.1 like 4A                | EPB41L4A  |
| ENSGALT0000 DPY30 domain containing 1                                    | DYDC1     |
| ENSGALT0000 endothelin converting enzyme-like 1                          | ECEL1     |
| ENSGALT0000 poly [ADP-ribose] polymerase 12-like                         | LOC418108 |
| ENSGALT0000 FRAS1-related extracellular matrix protein 1-like            | LOC424679 |
| ENSGALT0000 prokineticin 1                                               | PROK1     |
| ENSGALT0000 platelet-activating factor receptor                          | PTAFR     |
| ENSGALT0000 transmembrane protein 72                                     | TMEM72    |
| ENSGALT0000 BARX homeobox 2                                              | BARX2     |
| ENSGALT0000 G protein-coupled receptor 39                                | GPR39     |
| ENSGALT0000 tubulin, beta 2B class IIb                                   | TUBB2B    |
| ENSGALT0000 chromosome 22 open reading frame 39                          | C22orf39  |
| ENSGALT0000 lipoma HMGIC fusion partner-like 3                           | LHFPL3    |
| ENSGALT0000 nidogen 2 (osteonidogen)                                     | NID2      |
| ENSGALT0000 potassium channel tetramerisation domain containing 8        | KCTD8     |
| ENSGALT0000 family with sequence similarity 189, member A2               | FAM189A2  |
| ENSGALT0000 StAR-related lipid transfer (START) domain containing 13     | STARD13   |
| ENSGALT0000 glycerophosphodiester phosphodiesterase domain containi      | GDPD4     |
| ENSGALT0000 actin filament associated protein 1-like 2                   | AFAP1L2   |
| ENSGALT0000 LON peptidase N-terminal domain and ring finger 3            | LONRF3    |
| ENSGALT0000 tolloid-like 1                                               | TLL1      |
| ENSGALT0000 cytochrome P450, family 51, subfamily A, polypeptide 1       | CYP51A1   |
| ENSGALT0000 glycoporphin C                                               | GYPC      |
| ENSGALT0000 potassium voltage-gated channel, Shab-related subfamily      | KCNB2     |
| ENSGALT0000 family with sequence similarity 188, member B2               | FAM188B2  |
| ENSGALT0000 kinesin family member 5C                                     | KIF5C     |
| ENSGALT0000 cholinergic receptor, nicotinic, alpha 3                     | CHRNA3    |
| ENSGALT0000 TIMP metalloproteinase inhibitor 3                           | TIMP3     |
| ENSGALT0000 ribonuclease P/MRP 25kDa subunit                             | RPP25     |
| ENSGALT0000 insulin induced gene 1                                       | INSIG1    |
| ENSGALT0000 leucine rich repeat containing 43                            | LRRC43    |
| ENSGALT0000 H1 histone family, member 0                                  | H1F0      |
| ENSGALT0000 otoferlin                                                    | OTOF      |
| ENSGALT0000 transmembrane protein 163                                    | TMEM163   |
| ENSGALT0000 solute carrier organic anion transporter family, member 2    | SLCO2B1   |
| ENSGALT0000 Rho GTPase activating protein 28                             | ARHGAP28  |
| ENSGALT0000 LIM homeobox 1                                               | LHX1      |
| ENSGALT0000 neuropilin 2                                                 | NRP2      |
| ENSGALT0000 ST3 beta-galactoside alpha-2,3-sialyltransferase 5           | ST3GAL5   |
| ENSGALT0000 solute carrier family 2 (facilitated glucose/fructose transp | SLC2A5    |
| ENSGALT0000 short chain dehydrogenase/reductase family 42E, membe        | SDR42E2   |
| ENSGALT0000 caspase recruitment domain family, member 11                 | CARD11    |
| ENSGALT0000 myc target 1                                                 | MYCT1     |
| ENSGALT0000 oligodendrocyte myelin glycoprotein                          | OMG       |
| ENSGALT0000 protein tyrosine phosphatase, receptor type, O               | PTPRO     |
| ENSGALT0000 cathepsin L1-like                                            | LOC420160 |
| ENSGALT0000 dapper, antagonist of beta-catenin, homolog 2 (Xenopus I     | DACT2     |

|                                                                          |              |
|--------------------------------------------------------------------------|--------------|
| ENSGALT0000 proline rich 5 like                                          | PRR5L        |
| ENSGALT0000 hairy and enhancer of split 5-like                           | LOC419390    |
| ENSGALT0000 hypothetical protein LOC425113                               | LOC425113    |
| ENSGALT0000 purinergic receptor P2Y, G-protein coupled, 12               | P2RY12       |
| ENSGALT0000 periostin, osteoblast specific factor                        | POSTN        |
| ENSGALT0000 DIX domain containing 1                                      | DIXDC1       |
| ENSGALT0000 potassium channel, subfamily K, member 9                     | KCNK9        |
| ENSGALT0000 apolipoprotein L domain containing 1                         | APOLD1       |
| ENSGALT0000 olfactory receptor 52B2-like                                 | LOC428111    |
| ENSGALT0000 microtubule-associated protein 1A                            | MAP1A        |
| ENSGALT0000 leukocyte receptor tyrosine kinase                           | LTK          |
| ENSGALT0000 aldehyde dehydrogenase 1 family, member A2                   | ALDH1A2      |
| ENSGALT0000 relaxin/insulin-like family peptide receptor 1               | RXFP1        |
| ENSGALT0000 kelch domain containing 8A                                   | KLHDC8A      |
| ENSGALT0000 L-threonine dehydrogenase                                    | TDH          |
| ENSGALT0000 dehydrogenase/reductase (SDR family) member 3                | DHRS3        |
| ENSGALT0000 endothelin 2                                                 | EDN2         |
| ENSGALT0000 family with sequence similarity 19 (chemokine (C-C motif)    | FAM19A2      |
| ENSGALT0000 TenascinUncharacterized protein                              | Q90996_CHICK |
| ENSGALT0000 chromosome 1 open reading frame 216                          | C1orf216     |
| ENSGALT0000 Ras association (RalGDS/AF-6) domain family member 2         | RASSF2       |
| ENSGALT0000 hydroxy-delta-5-steroid dehydrogenase, 3 beta- and sterc     | HSD3B1       |
| ENSGALT0000 aspartoacylase                                               | ASPA         |
| ENSGALT0000 GDNF family receptor alpha 3                                 | GFRA3        |
| ENSGALT0000 Small Cajal body specific RNA 11                             | SCARNA11     |
| ENSGALT0000 solute carrier organic anion transporter family, member 3/   | SLCO3A1      |
| ENSGALT0000 potassium voltage-gated channel, Shab-related subfamily      | KCNB1        |
| ENSGALT0000 stearyl-CoA desaturase (delta-9-desaturase)                  | SCD          |
| ENSGALT0000 doublecortin                                                 | DCX          |
| ENSGALT0000 ubiquitin carboxyl-terminal esterase L1 (ubiquitin thioleste | UCHL1        |
| ENSGALT0000 Kruppel-like factor 7 (ubiquitous)                           | KLF7         |
| ENSGALT0000 laminin, beta 4                                              | LAMB4        |
| ENSGALT0000 myosin IIIB                                                  | MYO3B        |
| ENSGALT0000 hydroxysteroid (17-beta) dehydrogenase 7                     | HSD17B7      |
| ENSGALT0000 IQ motif and Sec7 domain 3                                   | IQSEC3       |
| ENSGALT0000 ADAM metallopeptidase with thrombospondin type 1 moti        | ADAMTS2      |
| ENSGALT0000 microtubule-associated protein 2                             | MAP2         |
| ENSGALT0000 family with sequence similarity 20, member C                 | FAM20C       |
| ENSGALT0000 monoamine oxidase A                                          | MAOA         |
| ENSGALT0000 receptor (G protein-coupled) activity modifying protein 1    | RAMP1        |
| ENSGALT0000 toll-like receptor 4                                         | TLR4         |
| ENSGALT0000 BTB (POZ) domain containing 17                               | BTBD17       |
| ENSGALT0000 myosin IB                                                    | MYO1B        |
| ENSGALT0000 N-deacetylase/N-sulfotransferase (heparan glucosaminyll      | NDST4        |
| ENSGALT0000 G protein-coupled receptor 65                                | GPR65        |
| ENSGALT0000 macrophage receptor with collagenous structure               | MARCO        |
| ENSGALT0000 transmembrane protein 27                                     | TMEM27       |
| ENSGALT0000 carbohydrate (N-acetyl)galactosamine 4-sulfate 6-O) sulfo    | CHST15       |

|                                                                              |             |
|------------------------------------------------------------------------------|-------------|
| ENSGALT0000 synaptopodin 2                                                   | SYNPO2      |
| ENSGALT0000 prostaglandin E receptor 3, subtype EP3                          | PTGER3      |
| ENSGALT0000 protein tyrosine phosphatase, non-receptor type 5 (striatum)     | PTPN5       |
| ENSGALT0000 LY6/PLAUR domain containing 1                                    | LYPD1       |
| ENSGALT0000 trypsin inhibitor CITI-1-like                                    | LOC770729   |
| ENSGALT0000 regulating synaptic membrane exocytosis 2                        | RIMS2       |
| ENSGALT0000 chromosome 1 open reading frame, human C7orf55                   | C1H7orf55   |
| ENSGALT0000 cytochrome P-450 2C45                                            | CYP2C45     |
| ENSGALT0000 complement factor H                                              | CFH         |
| ENSGALT0000 calpain 9                                                        | CAPN9       |
| ENSGALT0000 heparin-binding EGF-like growth factor                           | HBEGF       |
| ENSGALT0000 complement component 1, q subcomponent, A chain                  | C1QA        |
| ENSGALT0000 R3H domain containing-like                                       | R3HDML      |
| ENSGALT0000 adrenomedullin                                                   | ADM         |
| ENSGALT0000 G protein-coupled receptor, family C, group 5, member A          | GPRC5A      |
| ENSGALT0000 potassium inwardly-rectifying channel, subfamily J, member K     | KCNJ6       |
| ENSGALT0000 zinc finger, DHHC-type containing 22                             | ZDHHC22     |
| ENSGALT0000 villin 1                                                         | VIL1        |
| ENSGALT0000 zinc finger protein 366                                          | ZNF366      |
| ENSGALT0000 serine/threonine kinase 10                                       | STK10       |
| ENSGALT0000 zinc finger protein 503                                          | ZNF503      |
| ENSGALT0000 collagen, type XXVIII, alpha 1                                   | COL28A1     |
| ENSGALT0000 phosphatidic acid phosphatase type 2 domain containing           | PPAPDC3     |
| ENSGALT0000 solute carrier family 15 (oligopeptide transporter), member 1    | SLC15A1     |
| ENSGALT0000 creatine kinase, mitochondrial 1A                                | CKMT1A      |
| ENSGALT0000 thrombomodulin                                                   | THBD        |
| ENSGALT0000 Rho-related BTB domain containing 3                              | RHOBTB3     |
| ENSGALT0000 protein tyrosine phosphatase, non-receptor type 11-like          | LOC419429   |
| ENSGALT0000 chromosome 3 open reading frame 55                               | C3orf55     |
| ENSGALT0000 kelch-like 25 (Drosophila)                                       | KLHL25      |
| ENSGALT0000 protein tyrosine phosphatase, receptor type, N polypeptide       | PTPRN2      |
| ENSGALT0000 acyl-CoA thioesterase 11                                         | ACOT11      |
| ENSGALT0000 hippocalcin-like 1                                               | HPCAL1      |
| ENSGALT0000 family with sequence similarity 212, member B                    | FAM212B     |
| ENSGALT0000 leucine rich repeat containing 32                                | LRRC32      |
| ENSGALT0000 calpain 3, (p94)                                                 | CAPN3       |
| ENSGALT0000 transmembrane protein 37                                         | TMEM37      |
| ENSGALT0000 CD93 molecule                                                    | CD93        |
| ENSGALT0000 ventricular zone expressed PH domain homolog 1 (zebrafish)       | VEPH1       |
| ENSGALT0000 myosin IF                                                        | MYO1F       |
| ENSGALT0000 glycerophosphodiester phosphodiesterase domain containing        | GDPD5       |
| ENSGALT0000 WAP, follistatin/kazal, immunoglobulin, kunitz and netrin domain | WFIKKN2     |
| ENSGALT0000 V-set and transmembrane domain containing 2 like                 | VSTM2L      |
| ENSGALT0000 chromosome 4 open reading frame, human C20orf194                 | C4H20orf194 |
| ENSGALT0000 N-deacetylase/N-sulfotransferase (heparan glucosaminyl)          | NDST3       |
| ENSGALT0000 neural cell adhesion molecule 2                                  | NCAM2       |
| ENSGALT0000 glutamate receptor, metabotropic 8                               | GRM8        |
| ENSGALT0000 forkhead box C2 (MFH-1, mesenchyme forkhead 1)                   | FOXC2       |



|                                                                              |           |
|------------------------------------------------------------------------------|-----------|
| ENSGALT0000 phosphodiesterase 1C, calmodulin-dependent 70kDa                 | PDE1C     |
| ENSGALT0000 G protein-activated inward rectifier potassium channel 1-like    | LOC429785 |
| ENSGALT0000 calcium binding protein 39-like                                  | CAB39L    |
| ENSGALT0000 rho GTPase-activating protein 7-like                             | LOC416169 |
| ENSGALT0000 leupaxin                                                         | LPXN      |
| ENSGALT0000 phospholipase C, delta 1                                         | PLCD1     |
| ENSGALT0000 NEL-like 2 (chicken)                                             | NELL2     |
| ENSGALT0000 lipase A, lysosomal acid, cholesterol esterase (Wolman disease)  | LIPA      |
| ENSGALT0000 MID1 interacting protein 1 (gastrulation specific G12 homolog)   | MID1IP1   |
| ENSGALT0000 xylosyltransferase I                                             | XYLT1     |
| ENSGALT0000 RAB26, member RAS oncogene family                                | RAB26     |
| ENSGALT0000 neuroligin 4, X-linked                                           | NLGN4X    |
| ENSGALT0000 branched chain amino-acid transaminase 1, cytosolic              | BCAT1     |
| ENSGALT0000 phosphodiesterase 9A                                             | PDE9A     |
| ENSGALT0000 delta-like 4 (Drosophila)                                        | DLL4      |
| ENSGALT0000 isopentenyl-diphosphate delta isomerase 1                        | IDI1      |
| ENSGALT0000 UDP-Gal:betaGlcNAc beta 1,3-galactosyltransferase, polypeptide 4 | B3GALT4   |
| ENSGALT0000 fatty-acid amide hydrolase 1-like                                | LOC429098 |
| ENSGALT0000 histamine N-methyltransferase                                    | HNMT      |
| ENSGALT0000 sulfotransferase family, cytosolic, 6B, member 1                 | SULT6B1   |
| ENSGALT0000 ADAM metalloproteinase with thrombospondin type 1 motifs         | ADAMTS9   |
| ENSGALT0000 spastic ataxia of Charlevoix-Saguenay (sacsin)                   | SACS      |
| ENSGALT0000 musculoskeletal, embryonic nuclear protein 1                     | MUSTN1    |
| ENSGALT0000 cytochrome c oxidase subunit VIa polypeptide 1                   | COX6A1    |
| ENSGALT0000 response gene to complement 32 protein-like                      | LOC422284 |
| ENSGALT0000 bradykinin receptor B2                                           | BDKRB2    |
| ENSGALT0000 ribosomal protein S6 kinase, 90kDa, polypeptide 2                | RPS6KA2   |
| ENSGALT0000 \N                                                               | SOX18     |
| ENSGALT0000 oxysterol binding protein-like 8                                 | OSBPL8    |
| ENSGALT0000 ubiquitin associated and SH3 domain containing B                 | UBASH3B   |
| ENSGALT0000 spleen focus forming virus (SFFV) proviral integration oncogene  | SPI1      |
| ENSGALT0000 opticin                                                          | OPTC      |
| ENSGALT0000 spondin 1, extracellular matrix protein                          | SPON1     |
| ENSGALT0000 protein tyrosine phosphatase, receptor type, E                   | PTPRE     |
| ENSGALT0000 SPARC-like 1 (hevin)                                             | SPARCL1   |
| ENSGALT0000 IKAROS family zinc finger 1 (Ikaros)                             | IKZF1     |
| ENSGALT0000 tropomodulin 4 (muscle)                                          | TMOD4     |
| ENSGALT0000 kelch-like 36 (Drosophila)                                       | KLHL36    |
| ENSGALT0000 chromosome 1 open reading frame 190                              | C1orf190  |
| ENSGALT0000 poly (ADP-ribose) polymerase family, member 8                    | PARP8     |
| ENSGALT0000 contactin associated protein-like 5                              | CNTNAP5   |
| ENSGALT0000 RAP1, GTP-GDP dissociation stimulator 1                          | RAP1GDS1  |
| ENSGALT0000 calcium binding protein 1                                        | CABP1     |
| ENSGALT0000 ADAM metalloproteinase with thrombospondin type 1 motifs         | ADAMTS15  |
| ENSGALT0000 T-box 2                                                          | TBX2      |
| ENSGALT0000 WD repeat domain 66                                              | WDR66     |
| ENSGALT0000 potassium channel, subfamily V, member 1                         | KCNV1     |
| ENSGALT0000 stomatin                                                         | STOM      |

|                                                                                 |            |
|---------------------------------------------------------------------------------|------------|
| ENSGALT0000 synaptotagmin IV                                                    | SYT4       |
| ENSGALT0000 NLR family, CARD domain containing 3                                | NLRC3      |
| ENSGALT0000 sterile alpha motif domain containing 10                            | SAMD10     |
| ENSGALT0000 deiodinase, iodothyronine, type II                                  | DIO2       |
| ENSGALT0000 epoxide hydrolase 4                                                 | EPHX4      |
| ENSGALT0000 forkhead box N4                                                     | FOXN4      |
| ENSGALT0000 nudix (nucleoside diphosphate linked moiety X)-type motif 15        | NUDT15     |
| ENSGALT0000 3-hydroxy-3-methylglutaryl-CoA synthase 1 (soluble)                 | HMGCS1     |
| ENSGALT0000 protogenin                                                          | PRTG       |
| ENSGALT0000 chemokine (C-X-C motif) ligand 14                                   | CXCL14     |
| ENSGALT0000 phospholipid scramblase family, member 5                            | PLSCR5     |
| ENSGALT0000 ras homolog gene family, member H                                   | RHOH       |
| ENSGALT0000 coiled-coil domain containing 109B                                  | CCDC109B   |
| ENSGALT0000 potassium large conductance calcium-activated channel, subunit 1    | KCNMA1     |
| ENSGALT0000 p21 protein (Cdc42/Rac)-activated kinase 6                          | PAK6       |
| ENSGALT0000 calcium channel, voltage-dependent, L type, alpha 1D subunit 1      | CACNA1D    |
| ENSGALT0000 forkhead box S1                                                     | FOXS1      |
| ENSGALT0000 FYVE, RhoGEF and PH domain containing 5                             | FGD5       |
| ENSGALT0000 formin-like 1                                                       | FMNL1      |
| ENSGALT0000 NADH dehydrogenase (ubiquinone) flavoprotein 3, 10kDa subunit 3     | NDUFV3     |
| ENSGALT0000 calpain 2, (m/II) large subunit                                     | CAPN2      |
| ENSGALT0000 ankyrin 1, erythrocytic                                             | ANK1       |
| ENSGALT0000 cartilage intermediate layer protein, nucleotide pyrophosphatase 1  | CILP       |
| ENSGALT0000 cytochrome b-245, beta polypeptide                                  | CYBB       |
| ENSGALT0000 family with sequence similarity 163, member A                       | FAM163A    |
| ENSGALT0000 V-set domain containing T cell activation inhibitor 1-like 1        | LOC418554  |
| ENSGALT0000 microsomal triglyceride transfer protein large subunit-like 1       | LOC769580  |
| ENSGALT0000 melanophilin                                                        | MLPH       |
| ENSGALT0000 spinster homolog 3 (Drosophila)                                     | SPNS3      |
| ENSGALT0000 taste receptor, type 1, member 3                                    | TAS1R3     |
| ENSGALT0000 tenascin R (restrictin, janusin)                                    | TNR        |
| ENSGALT0000 proprotein convertase subtilisin/kexin type 2                       | PCSK2      |
| ENSGALT0000 Cdc42 guanine nucleotide exchange factor (GEF) 9                    | ARHGEF9    |
| ENSGALT0000 nucleoporin-like protein 2-like 1                                   | LOC420615  |
| ENSGALT0000 chemokine                                                           | CCLI7      |
| ENSGALT0000 chordin-like 1                                                      | CHRD1      |
| ENSGALT0000 leukocyte ribonuclease A-2                                          | RSFR       |
| ENSGALT0000 kinase insert domain receptor (a type III receptor tyrosine kinase) | KDR        |
| ENSGALT0000 regulator of G-protein signaling 3                                  | RGS3       |
| ENSGALT0000 chromosome 17 open reading frame, human C9orf91                     | C17H9orf91 |
| ENSGALT0000 KN motif and ankyrin repeat domains 3                               | KANK3      |
| ENSGALT0000 adenomatous polyposis coli down-regulated 1                         | APCDD1     |
| ENSGALT0000 cholinergic receptor, nicotinic, beta 3                             | CHRN3      |
| ENSGALT0000 DENN/MADD domain containing 5B                                      | DENND5B    |
| ENSGALT0000 CD99 molecule-like 2                                                | CD99L2     |
| ENSGALT0000 dipeptidyl-peptidase 10 (non-functional)                            | DPP10      |
| ENSGALT0000 creatine kinase, brain                                              | CKB        |
| ENSGALT0000 chromosome 20 open reading frame 160                                | C20orf160  |

|                                                                           |             |
|---------------------------------------------------------------------------|-------------|
| ENSGALT0000 multimerin 2                                                  | MMRN2       |
| ENSGALT0000 Rho GTPase activating protein 40                              | ARHGAP40    |
| ENSGALT0000 DEP domain containing MTOR-interacting protein                | DEPTOR      |
| ENSGALT0000 growth factor receptor-bound protein 14                       | GRB14       |
| ENSGALT0000 tripartite motif containing 9                                 | TRIM9       |
| ENSGALT0000 inositol polyphosphate-5-phosphatase, 145kDa                  | INPP5D      |
| ENSGALT0000 neuralized homolog 2 (Drosophila)                             | NEURL2      |
| ENSGALT0000 transient receptor potential cation channel, subfamily M, r   | TRPM1       |
| ENSGALT0000 calcium and integrin binding family member 2                  | CIB2        |
| ENSGALT0000 dynamin 1                                                     | DNM1        |
| ENSGALT0000 ral guanine nucleotide dissociation stimulator-like 1         | RGL1        |
| ENSGALT0000 phospholipase A2, group IIE                                   | PLA2G2E     |
| ENSGALT0000 EGF-like, fibronectin type III and laminin G domains          | EGFLAM      |
| ENSGALT0000 spire homolog 1 (Drosophila)                                  | SPIRE1      |
| ENSGALT0000 phosphatidylinositol transfer protein, cytoplasmic 1          | PITPNC1     |
| ENSGALT0000 rabphilin 3A homolog (mouse)                                  | RPH3A       |
| ENSGALT0000 alpha 1,4-galactosyltransferase                               | A4GALT      |
| ENSGALT0000 chromosome Z open reading frame, human C20orf134              | CZH20orf134 |
| ENSGALT0000 hepatic and glial cell adhesion molecule                      | HEPACAM     |
| ENSGALT0000 toll-like receptor 15                                         | TLR15       |
| ENSGALT0000 SET domain containing (lysine methyltransferase) 7            | SETD7       |
| ENSGALT0000 solute carrier family 6 (neurotransmitter transporter, taurin | SLC6A6      |
| ENSGALT0000 glycerol-3-phosphate dehydrogenase 1 (soluble)                | GPD1        |
| ENSGALT0000 synapsin III                                                  | SYN3        |
| ENSGALT0000 anthrax toxin receptor 1                                      | ANTXR1      |
| ENSGALT0000 phosphatidylinositol-3,4,5-trisphosphate-dependent Rac ε      | PREX1       |
| ENSGALT0000 heme oxygenase (decycling) 1                                  | HMOX1       |
| ENSGALT0000 toll-like receptor 2 type1                                    | TLR2-1      |
| ENSGALT0000 Schwann cell-specific EGF-like repeat autocrine factor        | LOC395159   |
| ENSGALT0000 CD34 molecule                                                 | CD34        |
| ENSGALT0000 prolactin-like protein                                        | LOC417800   |
| ENSGALT0000 matrix metalloproteinase 17 (membrane-inserted)               | MMP17       |
| ENSGALT0000 tau tubulin kinase 2                                          | TTBK2       |
| ENSGALT0000 triggering receptor expressed on myeloid cells 2              | TREM2       |
| ENSGALT0000 Kruppel-like factor 1 (erythroid)                             | KLF1        |
| ENSGALT0000 chromosome Z open reading frame, human C9orf25                | CZH9orf25   |
| ENSGALT0000 protocadherin 1                                               | PCDH1       |
| ENSGALT0000 echinoderm microtubule associated protein like 5              | EML5        |
| ENSGALT0000 neuroligin 3                                                  | NLGN3       |
| ENSGALT0000 Friend leukemia virus integration 1                           | FLI1        |
| ENSGALT0000 RNA binding protein, autoantigenic (hnRNP-associated w        | RALY        |
| ENSGALT0000 chromosome 1 open reading frame, human C13orf15               | C1H13orf15  |
| ENSGALT0000 actin filament associated protein 1                           | AFAP1       |
| ENSGALT0000 kelch repeat and BTB (POZ) domain containing 13               | KBTBD13     |
| ENSGALT0000 ST6 (alpha-N-acetyl-neuraminyl-2,3-beta-galactosyl-1,3)-      | ST6GALNAC3  |
| ENSGALT0000 NADH dehydrogenase (ubiquinone) Fe-S protein 5, 15kD          | NDUFS5      |
| ENSGALT0000 WAS/WASL interacting protein family, member 1                 | WIPF1       |
| ENSGALT0000 mitochondrial ribosomal protein S21                           | MRPS21      |

|                                                                        |           |
|------------------------------------------------------------------------|-----------|
| ENSGALT0000 tubulin, beta 6 class V                                    | TUBB6     |
| ENSGALT0000 HtrA serine peptidase 1                                    | HTRA1     |
| ENSGALT0000 cytochrome P450, family 4, subfamily V, polypeptide 2      | CYP4V2    |
| ENSGALT0000 serine/threonine kinase 32B                                | STK32B    |
| ENSGALT0000 family with sequence similarity 26, member E               | FAM26E    |
| ENSGALT0000 C-type lectin domain family 2 member D-like                | LOC769384 |
| ENSGALT0000 zinc finger E-box binding homeobox 1                       | ZEB1      |
| ENSGALT0000 ATP-binding cassette, sub-family B (MDR/TAP), member ABCB1 | ABCB1     |
| ENSGALT0000 NADH dehydrogenase (ubiquinone) 1 beta subcomplex, 4       | NDUFB4    |
| ENSGALT0000 tektin 2 (testicular)                                      | TEKT2     |
| ENSGALT0000 coronin, actin binding protein, 1C                         | CORO1C    |
| ENSGALT0000 HINTW                                                      | HINTW     |
| ENSGALT0000 centrosomal protein 170kDa                                 | CEP170    |
| ENSGALT0000 deleted in liver cancer 1                                  | DLC1      |
| ENSGALT0000 ATPase, H+ transporting, lysosomal 42kDa, V1 subunit C     | ATP6V1C2  |
| ENSGALT0000 solute carrier family 45, member 2                         | SLC45A2   |
| ENSGALT0000 cyclic nucleotide gated channel beta 1                     | CNGB1     |
| ENSGALT0000 dihydropyrimidinase-like 2                                 | DPYSL2    |
| ENSGALT0000 RAB36, member RAS oncogene family                          | RAB36     |
| ENSGALT0000 FYN oncogene related to SRC, FGR, YES                      | FYN       |
| ENSGALT0000 DnaJ (Hsp40) homolog, subfamily C, member 22               | DNAJC22   |
| ENSGALT0000 unc-13 homolog C (C. elegans)                              | UNC13C    |
| ENSGALT0000 major histocompatibility complex, class I-related          | MR1       |
| ENSGALT0000 discs, large (Drosophila) homolog-associated protein 1     | DLGAP1    |
| ENSGALT0000 solute carrier family 16, member 7 (monocarboxylic acid t  | SLC16A7   |
| ENSGALT0000 Ras association and DIL domains                            | RADIL     |
| ENSGALT0000 versican                                                   | VCAN      |
| ENSGALT0000 collagen, type XXII, alpha 1                               | COL22A1   |
| ENSGALT0000 acyl-CoA synthetase long-chain family member 6             | ACSL6     |
| ENSGALT0000 transglutaminase 2 (C polypeptide, protein-glutamine-gan   | TGM2      |
| ENSGALT0000 lysosomal-associated membrane protein 3                    | LAMP3     |
| ENSGALT0000 retinal pigment epithelium-derived rhodopsin homolog       | RRH       |
| ENSGALT0000 uridine phosphorylase 2                                    | UPP2      |
| ENSGALT0000 microtubule associated tumor suppressor 1                  | MTUS1     |
| ENSGALT0000 ATP/GTP binding protein-like 1                             | AGBL1     |
| ENSGALT0000 monocyte to macrophage differentiation-associated          | MMD       |
| ENSGALT0000 ring finger protein 152                                    | RNF152    |
| ENSGALT0000 \N                                                         | HSP25     |
| ENSGALT0000 TNF receptor-associated factor 4                           | TRAF4     |
| ENSGALT0000 pyridoxal (pyridoxine, vitamin B6) phosphatase             | PDXP      |
| ENSGALT0000 cholecystokinin                                            | CCK       |
| ENSGALT0000 bactericidal/permeability-increasing protein               | BPI       |
| ENSGALT0000 integrin, alpha 1                                          | ITGA1     |
| ENSGALT0000 olfactomedin-like 3                                        | OLFML3    |
| ENSGALT0000 ganglioside-induced differentiation-associated protein 1   | GDAP1     |
| ENSGALT0000 somatostatin receptor 3                                    | SSTR3     |
| ENSGALT0000 RGM domain family, member B                                | RGMB      |
| ENSGALT0000 protein tyrosine phosphatase, receptor type, M             | PTPRM     |

|                                                                            |           |
|----------------------------------------------------------------------------|-----------|
| ENSGALT0000 sema domain, transmembrane domain (TM), and cytopla:           | SEMA6A    |
| ENSGALT0000 hepatic nuclear factor 4beta                                   | HNF4beta  |
| ENSGALT0000 solute carrier family 22 (organic anion transporter), memb     | SLC22A7   |
| ENSGALT0000 glutamate receptor, metabotropic 5                             | GRM5      |
| ENSGALT0000 plexin D1                                                      | PLXND1    |
| ENSGALT0000 shisa homolog 2 ( <i>Xenopus laevis</i> )                      | SHISA2    |
| ENSGALT0000 interferon, gamma-inducible protein 30                         | IFI30     |
| ENSGALT0000 ATPase, Ca <sup>++</sup> transporting, ubiquitous              | ATP2A3    |
| ENSGALT0000 chemokine-like receptor 1-like                                 | LOC427665 |
| ENSGALT0000 LIM domain only 2 (rhombotin-like 1)                           | LMO2      |
| ENSGALT0000 protein phosphatase 1, regulatory (inhibitor) subunit 14D      | PPP1R14D  |
| ENSGALT0000 DEAD (Asp-Glu-Ala-Asp) box polypeptide 28                      | DDX28     |
| ENSGALT0000 tissue factor pathway inhibitor 2                              | TFPI2     |
| ENSGALT0000 EGF, latrophilin and seven transmembrane domain conta          | ELTD1     |
| ENSGALT0000 schwannomin interacting protein 1                              | SCHIP1    |
| ENSGALT0000 vacuolar protein sorting 37 homolog B ( <i>S. cerevisiae</i> ) | VPS37B    |
| ENSGALT0000 cysteine-rich protein 2                                        | CRIP2     |
| ENSGALT0000 serine hydroxymethyltransferase 1 (soluble)                    | SHMT1     |
| ENSGALT0000 glutathione S-transferase class-alpha                          | GSTA      |
| ENSGALT0000 aminopeptidase Q-like                                          | LOC431649 |
| ENSGALT0000 oleoyl-ACP hydrolase                                           | OLAH      |
| ENSGALT0000 synuclein, alpha interacting protein                           | SNCAIP    |
| ENSGALT0000 dachshund homolog 2 ( <i>Drosophila</i> )                      | DACH2     |
| ENSGALT0000 tumor necrosis factor, alpha-induced protein 8-like 3          | TNFAIP8L3 |
| ENSGALT0000 cadherin 7, type 2                                             | CDH7      |
| ENSGALT0000 inositol-tetrakisphosphate 1-kinase                            | ITPK1     |
| ENSGALT0000 N-deacetylase/N-sulfotransferase (heparan glucosaminyl)        | NDST2     |
| ENSGALT0000 cytoplasmic polyadenylation element binding protein 4          | CPEB4     |
| ENSGALT0000 squalene monooxygenase                                         | SQLE      |
| ENSGALT0000 Ras-related associated with diabetes                           | RRAD      |
| ENSGALT0000 actin related protein 2/3 complex subunit 1B                   | ARPC1B    |
| ENSGALT0000 hexokinase 3 (white cell)                                      | HK3       |
| ENSGALT0000 actin, alpha, cardiac muscle 1                                 | ACTC1     |
| ENSGALT0000 potassium channel, subfamily U, member 1                       | KCNU1     |
| ENSGALT0000 dehydrogenase/reductase (SDR family) member 13                 | DHRS13    |
| ENSGALT0000 cAMP-dependent protein kinase inhibitor alpha                  | PKIA      |
| ENSGALT0000 solute carrier family 25, member 30                            | SLC25A30  |
| ENSGALT0000 GTP cyclohydrolase 1                                           | GCH1      |
| ENSGALT0000 brain expressed, associated with NEDD4, 1                      | BEAN1     |
| ENSGALT0000 retinoic acid receptor, beta                                   | RARB      |
| ENSGALT0000 tyrosine kinase with immunoglobulin-like and EGF-like do       | TIE1      |
| ENSGALT0000 protocadherin 12                                               | PCDH12    |
| ENSGALT0000 solute carrier organic anion transporter family member 1C      | LOC418189 |
| ENSGALT0000 quinoid dihydropteridine reductase                             | QDPR      |
| ENSGALT0000 stimulator of chondrogenesis 1                                 | SCRG1     |
| ENSGALT0000 T-box, brain, 1                                                | TBR1      |
| ENSGALT0000 NudC domain containing 1                                       | NUDCD1    |
| ENSGALT0000 stabilin 2                                                     | STAB2     |

|                                                                                  |            |
|----------------------------------------------------------------------------------|------------|
| ENSGALT0000 spectrin, beta, non-erythrocytic 5                                   | SPTBN5     |
| ENSGALT0000 adenylate kinase 5                                                   | AK5        |
| ENSGALT0000 immunoglobulin superfamily, member 11                                | IGSF11     |
| ENSGALT0000 fibroblast growth factor 22                                          | FGF22      |
| ENSGALT0000 nuclear receptor subfamily 4, group A, member 3                      | NR4A3      |
| ENSGALT0000 BR serine/threonine kinase 2                                         | BRSK2      |
| ENSGALT0000 family with sequence similarity 20, member C-like                    | LOC418020  |
| ENSGALT0000 B-cell linker                                                        | BLNK       |
| ENSGALT0000 vascular endothelial growth factor receptor kdr-like                 | LOC422316  |
| ENSGALT0000 NADH dehydrogenase (ubiquinone) 1 beta subcomplex, 5                 | NDUFB9     |
| ENSGALT0000 purinergic receptor P2Y, G-protein coupled, 2                        | P2RY2      |
| ENSGALT0000 scavenger receptor class F, member 1                                 | SCARF1     |
| ENSGALT0000 parathyroid hormone 1 receptor                                       | PTH1R      |
| ENSGALT0000 Rho GTPase activating protein 25                                     | ARHGAP25   |
| ENSGALT0000 kelch-like 4 (Drosophila)                                            | KLHL4      |
| ENSGALT0000 ninjurin 2                                                           | NINJ2      |
| ENSGALT0000 solute carrier family 18 (vesicular monoamine), member 2             | SLC18A2    |
| ENSGALT0000 secreted frizzled-related protein 5                                  | SFRP5      |
| ENSGALT0000 membrane associated guanylate kinase, WW and PDZ domain containing 1 | MAGI1      |
| ENSGALT0000 SH3 and PX domains 2B                                                | SH3PXD2B   |
| ENSGALT0000 brain protein 44-like                                                | BRP44L     |
| ENSGALT0000 hematopoietically expressed homeobox                                 | HHEX       |
| ENSGALT0000 SEC14-like 1 (S. cerevisiae)                                         | SEC14L1    |
| ENSGALT0000 solute carrier family 8 (sodium/calcium exchanger), member 1         | SLC8A1     |
| ENSGALT0000 chromosome X open reading frame 69                                   | CXorf69    |
| ENSGALT0000 interleukin 2 receptor, gamma (severe combined immunodeficiency)     | IL2RG      |
| ENSGALT0000 RGM domain family, member A                                          | RGMA       |
| ENSGALT0000 regulator of G protein signaling 9 binding protein                   | RGS9BP     |
| ENSGALT0000 nuclear factor of kappa light polypeptide gene enhancer in T-cells 3 | NFKBIE     |
| ENSGALT0000 Williams-Beuren syndrome chromosome region 17                        | WBSCR17    |
| ENSGALT0000 cofilin 2 (muscle)                                                   | CFL2       |
| ENSGALT0000 nuclear receptor subfamily 2, group E, member 1                      | NR2E1      |
| ENSGALT0000 Small Cajal body specific RNA 15                                     | SCARNA15   |
| ENSGALT0000 thrombospondin, type I, domain containing 1                          | THSD1      |
| ENSGALT0000 IMP3, U3 small nucleolar ribonucleoprotein, homolog (yeast)          | IMP3       |
| ENSGALT0000 ELK3, ETS-domain protein (SRF accessory protein 2)                   | ELK3       |
| ENSGALT0000 chromosome 5 open reading frame, human C11orf41                      | C5H11orf41 |
| ENSGALT0000 N-terminal EF-hand calcium binding protein 3                         | NECAB3     |
| ENSGALT0000 acetoacetyl-CoA synthetase                                           | AACS       |
| ENSGALT0000 integrin, alpha 6                                                    | ITGA6      |
| ENSGALT0000 fibroblast growth factor 5                                           | FGF5       |
| ENSGALT0000 Rho guanine nucleotide exchange factor (GEF) 10                      | ARHGEF10   |
| ENSGALT0000 tripartite motif containing 66                                       | TRIM66     |
| ENSGALT0000 NADH dehydrogenase (ubiquinone) 1 alpha subcomplex, 7                | NDUFA7     |
| ENSGALT0000 solute carrier family 16, member 8 (monocarboxylic acid transporter) | SLC16A8    |
| ENSGALT0000 ankyrin repeat domain 44                                             | ANKRD44    |
| ENSGALT0000 interleukin 17 receptor D                                            | IL17RD     |
| ENSGALT0000 NADH dehydrogenase (ubiquinone) 1 beta subcomplex, 2                 | NDUFB2     |

|                                                                           |             |
|---------------------------------------------------------------------------|-------------|
| ENSGALT0000 UDP-N-acetyl-alpha-D-galactosamine:polypeptide N-acet         | GALNTL1     |
| ENSGALT0000 sorbin and SH3 domain containing 1                            | SORBS1      |
| ENSGALT0000 NADH dehydrogenase (ubiquinone) Fe-S protein 7, 20kD          | NDUFS7      |
| ENSGALT0000 cytochrome P450, family 2, subfamily A, polypeptide 13        | CYP2A13     |
| ENSGALT0000 hypothetical protein LOC419620                                | CSF3R       |
| ENSGALT0000 cytohesin 4                                                   | CYTH4       |
| ENSGALT0000 transmembrane protein 116                                     | TMEM116     |
| ENSGALT0000 solute carrier family 1 (glial high affinity glutamate transp | SLC1A2      |
| ENSGALT0000 24-dehydrocholesterol reductase                               | DHCR24      |
| ENSGALT0000 scavenger receptor class B, member 1                          | SCARB1      |
| ENSGALT0000 coiled-coil domain containing 56                              | CCDC56      |
| ENSGALT0000 proline-serine-threonine phosphatase interacting protein 2    | PSTPIP2     |
| ENSGALT0000 signal transducing adaptor family member 1                    | STAP1       |
| ENSGALT0000 ventral anterior homeobox 1                                   | VAX1        |
| ENSGALT0000 complement receptor type 2-like                               | LOC771877   |
| ENSGALT0000 neuron-derived neurotrophic factor                            | NDNF        |
| ENSGALT0000 leucine rich repeat containing 61                             | LRRC61      |
| ENSGALT0000 chromosome 3 open reading frame, human C20orf103              | C3H20orf103 |
| ENSGALT0000 ATPase, aminophospholipid transporter (APLT), class I, ty     | ATP8A1      |
| ENSGALT0000 ATP-binding cassette, sub-family B (MDR/TAP), member          | ABCB9       |
| ENSGALT0000 pannexin 1                                                    | PANX1       |
| ENSGALT0000 bicaudal D homolog 1 (Drosophila)                             | BICD1       |
| ENSGALT0000 chondroitin sulfate N-acetylgalactosaminyltransferase 1       | CSGALNACT1  |
| ENSGALT0000 methylenetetrahydrofolate dehydrogenase (NADP+ depe           | MTHFD1L     |
| ENSGALT0000 myosin IIIA                                                   | MYO3A       |
| ENSGALT0000 dapper, antagonist of beta-catenin, homolog 1 (Xenopus        | DACT1       |
| ENSGALT0000 calpain 10                                                    | CAPN10      |
| ENSGALT0000 NHP2 ribonucleoprotein homolog (yeast)                        | NHP2        |
| ENSGALT0000 KH domain containing, RNA binding, signal transduction        | KHDRBS3     |
| ENSGALT0000 kin of IRRE like 3 (Drosophila)                               | KIRREL3     |
| ENSGALT0000 interferon regulatory factor 10                               | IRF10       |
| ENSGALT0000 mitochondrial ribosomal protein S16                           | MRPS16      |
| ENSGALT0000 ethylmalonic encephalopathy 1                                 | ETHE1       |
| ENSGALT0000 neuralized homolog (Drosophila)                               | NEURL       |
| ENSGALT0000 family with sequence similarity 126, member A                 | FAM126A     |
| ENSGALT0000 myosin light chain kinase family, member 4                    | MYLK4       |
| ENSGALT0000 SUN domain-containing protein 3-like                          | LOC776146   |
| ENSGALT0000 family with sequence similarity 198, member B                 | FAM198B     |
| ENSGALT0000 family with sequence similarity 196, member A                 | FAM196A     |
| ENSGALT0000 chromobox homolog 4 (Pc class homolog, Drosophila)            | CBX4        |
| ENSGALT0000 G-protein signaling modulator 1                               | GPSM1       |
| ENSGALT0000 STEAP family member 3                                         | STEAP3      |
| ENSGALT0000 poly (ADP-ribose) polymerase family, member 14                | PARP14      |
| ENSGALT0000 neurobeachin                                                  | NBEA        |
| ENSGALT0000 low density lipoprotein receptor class A domain containin     | LDLRAD1     |
| ENSGALT0000 prolactin                                                     | PRL         |
| ENSGALT0000 phosphodiesterase 5A, cGMP-specific                           | PDE5A       |
| ENSGALT0000 ADAM metallopeptidase with thrombospondin type 1 moti         | ADAMTS7     |

|                                                                                       |          |
|---------------------------------------------------------------------------------------|----------|
| ENSGALT0000 acyl-CoA synthetase long-chain family member 5                            | ACSL5    |
| ENSGALT0000 fatty acid desaturase 1                                                   | FADS1    |
| ENSGALT0000 ATPase, Na <sup>+</sup> /K <sup>+</sup> transporting, alpha 1 polypeptide | ATP1A1   |
| ENSGALT0000 3-oxoacid CoA transferase 1                                               | OXCT1    |
| ENSGALT0000 H3 histone, family 3A                                                     | H3-VIII  |
| ENSGALT0000 feline sarcoma oncogene                                                   | FES      |
| ENSGALT0000 microtubule-associated protein 4                                          | MAP4     |
| ENSGALT0000 calpain 13                                                                | CAPN13   |
| ENSGALT0000 contactin associated protein-like 2                                       | CNTNAP2  |
| ENSGALT0000 collectin sub-family member 10 (C-type lectin)                            | COLEC10  |
| ENSGALT0000 histidine decarboxylase                                                   | HDC      |
| ENSGALT0000 neuropeptide FF receptor 2                                                | NPFFR2   |
| ENSGALT0000 colony stimulating factor 1 receptor                                      | CSF1R    |
| ENSGALT0000 small nuclear ribonucleoprotein polypeptides B and B1                     | SNRNP    |
| ENSGALT0000 solute carrier family 13 (sodium-dependent citrate transp                 | SLC13A5  |
| ENSGALT0000 FERM domain containing 4A                                                 | FRMD4A   |
| ENSGALT0000 \N                                                                        | TAL1     |
| ENSGALT0000 guanylate cyclase 1, soluble, alpha 2                                     | GUCY1A2  |
| ENSGALT0000 potassium large conductance calcium-activated channel,                    | KCNMB2   |
| ENSGALT0000 BRCA1 interacting protein C-terminal helicase 1                           | BRIP1    |
| ENSGALT0000 family with sequence similarity 171, member B                             | FAM171B  |
| ENSGALT0000 transient receptor potential cation channel, subfamily C, n               | TRPC4    |
| ENSGALT0000 tropomodulin 2 (neuronal)                                                 | TMOD2    |
| ENSGALT0000 tetratricopeptide repeat domain 34                                        | TTC34    |
| ENSGALT0000 syntaxin binding protein 5-like                                           | STXBP5L  |
| ENSGALT0000 G protein-coupled receptor 143                                            | GPR143   |
| ENSGALT0000 G protein-coupled receptor 123                                            | GPR123   |
| ENSGALT0000 CKLF-like MARVEL transmembrane domain containing 8                        | CMTM8    |
| ENSGALT0000 Vesicle-trafficking protein SEC22b                                        | SEC22B   |
| ENSGALT0000 NADH dehydrogenase (ubiquinone) 1 alpha subcomplex,                       | NDUFA1   |
| ENSGALT0000 solute carrier family 6 (neutral amino acid transporter), m               | SLC6A15  |
| ENSGALT0000 inter-alpha-trypsin inhibitor heavy chain family, member 6                | ITIH6    |
| ENSGALT0000 dual specificity phosphatase 6                                            | DUSP6    |
| ENSGALT0000 ras homolog gene family, member J                                         | RHOJ     |
| ENSGALT0000 pleckstrin homology-like domain, family B, member 2                       | PHLDB2   |
| ENSGALT0000 baculoviral IAP repeat containing 7                                       | BIRC7    |
| ENSGALT0000 purinergic receptor P2Y, G-protein coupled, 1                             | P2RY1    |
| ENSGALT0000 trafficking protein particle complex 6B                                   | TRAPPC6B |
| ENSGALT0000 acyl-CoA synthetase long-chain family member 3                            | ACSL3    |
| ENSGALT0000 neuregulin 2                                                              | NRG2     |
| ENSGALT0000 lymphocyte cytosolic protein 1 (L-plastin)                                | LCP1     |
| ENSGALT0000 transmembrane protein 150A                                                | TMEM150A |
| ENSGALT0000 chemokine                                                                 | CXCL13L2 |
| ENSGALT0000 SH3 and multiple ankyrin repeat domains 3                                 | SHANK3   |
| ENSGALT0000 olfactomedin 1                                                            | OLFM1    |
| ENSGALT0000 Ras and Rab interactor 3                                                  | RIN3     |
| ENSGALT0000 phosphopantothencysteine synthetase                                       | PPCS     |
| ENSGALT0000 cadherin 5, type 2 (vascular endothelium)                                 | CDH5     |



|                                                                             |              |
|-----------------------------------------------------------------------------|--------------|
| ENSGALT0000 thioredoxin                                                     | TXN          |
| ENSGALT0000 collagen, type IV, alpha 1                                      | COL4A1       |
| ENSGALT0000 lanosterol synthase (2,3-oxidosqualene-lanosterol cyclase)      | LSS          |
| ENSGALT0000 MHC-like class I Y                                              | LOC768350    |
| ENSGALT0000 lysosomal protein transmembrane 5                               | LAPTM5       |
| ENSGALT0000 N-acylethanolamine acid amidase                                 | NAAA         |
| ENSGALT0000 nudix (nucleoside diphosphate linked moiety X)-type motif 1     | NUDT1        |
| ENSGALT0000 Insulin receptor related tyrosine kinase                        | Q9YI41_CHICK |
| ENSGALT0000 family with sequence similarity 213, member A                   | FAM213A      |
| ENSGALT0000 upstream stimulatory factor 1                                   | USF1         |
| ENSGALT0000 Rho family GTPase 3                                             | RND3         |
| ENSGALT0000 StAR-related lipid transfer (START) domain containing 9         | STARD9       |
| ENSGALT0000 Ras association (RalGDS/AF-6) domain family member 3            | RASSF3       |
| ENSGALT0000 protein phosphatase 2, regulatory subunit B, beta               | PPP2R2B      |
| ENSGALT0000 chromosome 10 open reading frame 90                             | C10orf90     |
| ENSGALT0000 phospholipase C-like 1                                          | PLCL1        |
| ENSGALT0000 mitogen-activated protein kinase kinase kinase 13               | MAP3K13      |
| ENSGALT0000 transmembrane protein 121                                       | TMEM121      |
| ENSGALT0000 EPH receptor A4                                                 | EPHA4        |
| ENSGALT0000 lipocalin 15                                                    | LCN15        |
| ENSGALT0000 calmin (calponin-like, transmembrane)                           | CLMN         |
| ENSGALT0000 sidekick homolog 1, cell adhesion molecule (chicken)            | SDK1         |
| ENSGALT0000 proteasome (prosome, macropain) assembly chaperone 4            | PSMG4        |
| ENSGALT0000 \N                                                              | ACTG2        |
| ENSGALT0000 transcription factor CP2-like 1                                 | TFCP2L1      |
| ENSGALT0000 chemokine-like factor superfamily 7                             | CMTM7        |
| ENSGALT0000 C-type lectin domain family 19 member A-like                    | LOC771758    |
| ENSGALT0000 phosphoprotein associated with glycosphingolipid microdomains   | PAG1         |
| ENSGALT0000 meteorin, glial cell differentiation regulator                  | METRNL       |
| ENSGALT0000 mitochondrial ribosomal protein S12                             | MRPS12       |
| ENSGALT0000 glypican 6                                                      | GPC6         |
| ENSGALT0000 chromosome 1 open reading frame, human CXorf36                  | C1HXorf36    |
| ENSGALT0000 chromosome 2 open reading frame, human C6orf145                 | C2H6orf145   |
| ENSGALT0000 zinc finger, HIT-type containing 3                              | ZNHIT3       |
| ENSGALT0000 ATP synthase subunit beta, mitochondrial                        | ATPB_CHICK   |
| ENSGALT0000 angiotensin like 1                                              | AMOTL1       |
| ENSGALT0000 ets variant 1                                                   | ETV1         |
| ENSGALT0000 chromosome 18 open reading frame, human C17orf67                | C18H17orf67  |
| ENSGALT0000 neuroligin 1                                                    | NLGN1        |
| ENSGALT0000 solute carrier family 22 (organic cation/carnitine transporter) | SLC22A16     |
| ENSGALT0000 abhydrolase domain containing 12B                               | ABHD12B      |
| ENSGALT0000 sushi-repeat containing protein, X-linked                       | SRPX         |
| ENSGALT0000 cysteine and glycine-rich protein 2                             | CSRP2        |
| ENSGALT0000 hedgehog acyltransferase-like                                   | HHATL        |
| ENSGALT0000 G protein-coupled receptor 37 like 1                            | GPR37L1      |
| ENSGALT0000 kelch repeat and BTB (POZ) domain containing 11                 | KBTBD11      |
| ENSGALT0000 four and a half LIM domains 3                                   | FHL3         |
| ENSGALT0000 LSM1 homolog, U6 small nuclear RNA associated (S. cerevisiae)   | LSM1         |

|                                                                         |           |
|-------------------------------------------------------------------------|-----------|
| ENSGALT0000 chemokine ah221                                             | LOC417536 |
| ENSGALT0000 neuron navigator 3                                          | NAV3      |
| ENSGALT0000 potassium voltage-gated channel, KQT-like subfamily, mem    | KCNQ4     |
| ENSGALT0000 gamma-glutamyltransferase 5                                 | GGT5      |
| ENSGALT0000 ceramide synthase 1                                         | CERS1     |
| ENSGALT0000 SLIT and NTRK-like family, member 4                         | SLITRK4   |
| ENSGALT0000 dihydropyrimidine dehydrogenase                             | DPYD      |
| ENSGALT0000 mitochondrial import receptor subunit TOM40B-like           | LOC770490 |
| ENSGALT0000 deoxyribonuclease I-like 3                                  | DNASE1L3  |
| ENSGALT0000 solute carrier family 22 (organic cation transporter), meml | SLC22A4   |
| ENSGALT0000 sushi domain containing 4                                   | SUSD4     |
| ENSGALT0000 immunoglobulin superfamily, member 21                       | IGSF21    |
| ENSGALT0000 RAB interacting factor                                      | RABIF     |
| ENSGALT0000 von Willebrand factor                                       | VWF       |
| ENSGALT0000 endonuclease/exonuclease/phosphatase family domain c        | EEPD1     |
| ENSGALT0000 hypothetical protein LOC422173                              | LOC422173 |
| ENSGALT0000 LIM domain only 4                                           | LMO4      |
| ENSGALT0000 platelet derived growth factor D                            | PDGFD     |
| ENSGALT0000 monoglyceride lipase                                        | MGLL      |
| ENSGALT0000 potassium inwardly-rectifying channel, subfamily J, memt    | KCNJ3     |
| ENSGALT0000 arylacetamide deacetylase-like 4                            | AADACL4   |
| ENSGALT0000 jagged 2                                                    | JAG2      |
| ENSGALT0000 translocase of inner mitochondrial membrane 10 homolog      | TIMM10    |
| ENSGALT0000 neuropeptide B-like                                         | LOC769277 |
| ENSGALT0000 protocadherin 18                                            | PCDH18    |
| ENSGALT0000 potassium channel, subfamily T, member 2                    | KCNT2     |
| ENSGALT0000 mitochondrial ribosomal protein S26                         | MRPS26    |
| ENSGALT0000 leucine-rich repeat LGI family, member 2                    | LGI2      |
| ENSGALT0000 family with sequence similarity 190, member B               | FAM190B   |
| ENSGALT0000 RNA binding motif protein 38                                | RBM38     |
| ENSGALT0000 alpha-N-acetylgalactosaminide alpha-2,6-sialyltransferase   | LOC422075 |
| ENSGALT0000 myosin, heavy chain 15                                      | MYH15     |
| ENSGALT0000 RCSD domain containing 1                                    | RCSD1     |
| ENSGALT0000 leucine zipper protein 2                                    | LUZP2     |
| ENSGALT0000 transmembrane protein 211                                   | TMEM211   |
| ENSGALT0000 cytosolic iron-sulfur protein assembly 1                    | CIAO1     |
| ENSGALT0000 tubulointerstitial nephritis antigen-like 1                 | TINAGL1   |
| ENSGALT0000 chromosome 8 open reading frame, human C1orf21              | C8H1orf21 |
| ENSGALT0000 chemokine (C-X3-C motif) ligand 1                           | CX3CL1    |
| ENSGALT0000 family with sequence similarity 78, member A                | FAM78A    |
| ENSGALT0000 heat shock transcription factor 4                           | HSF4      |
| ENSGALT0000 interleukin 17B                                             | IL17B     |
| ENSGALT0000 pyruvate dehydrogenase kinase, isozyme 4                    | PDK4      |
| ENSGALT0000 zygote arrest 1-like                                        | ZAR1L     |
| ENSGALT0000 CD247 molecule                                              | CD247     |
| ENSGALT0000 cyclin-dependent kinase 3                                   | CDK3      |
| ENSGALT0000 potassium inwardly-rectifying channel, subfamily J, memt    | KCNJ16    |
| ENSGALT0000 synaptojanin 2                                              | SYNJ2     |

|                                                                          |              |
|--------------------------------------------------------------------------|--------------|
| ENSGALT0000 ATPase, class V, type 10A                                    | ATP10A       |
| ENSGALT0000 inositol 1,4,5-trisphosphate receptor, type 1                | ITPR1        |
| ENSGALT0000 somatostatin receptor 5                                      | SSTR5        |
| ENSGALT0000 N-acetyltransferase, pineal gland isozyme NAT-10             | PNAT10       |
| ENSGALT0000 cellular repressor of E1A-stimulated genes 1                 | CREG1        |
| ENSGALT0000 aralkylamine N-acetyltransferase                             | AANAT        |
| ENSGALT0000 chromosome 20 open reading frame, human C20orf151            | C20H20orf151 |
| ENSGALT0000 SH3 domain binding glutamic acid-rich protein like 2         | SH3BGRL2     |
| ENSGALT0000 A kinase (PRKA) anchor protein 14                            | AKAP14       |
| ENSGALT0000 wingless-type MMTV integration site family, member 6         | WNT6         |
| ENSGALT0000 follistatin                                                  | FST          |
| ENSGALT0000 outer dense fiber of sperm tails 2-like                      | ODF2L        |
| ENSGALT0000 paired related homeobox 1                                    | PRRX1        |
| ENSGALT0000 chloride channel, calcium activated, family member 2         | CLCA2        |
| ENSGALT0000 hexokinase domain containing 1                               | HKDC1        |
| ENSGALT0000 lysophosphatidic acid receptor 3                             | LPAR3        |
| ENSGALT0000 zona pellucida binding protein                               | ZPBP         |
| ENSGALT0000 BCL2-like 15                                                 | BCL2L15      |
| ENSGALT0000 EGF containing fibulin-like extracellular matrix protein 1   | EFEMP1       |
| ENSGALT0000 stanniocalcin 2                                              | STC2         |
| ENSGALT0000 chromosome 11 open reading frame 16                          | C11orf16     |
| ENSGALT0000 notum pectinacylesterase homolog (Drosophila)                | NOTUM        |
| ENSGALT0000 solute carrier family 45, member 3                           | SLC45A3      |
| ENSGALT0000 solute carrier family 24 (sodium/potassium/calcium excha     | SLC24A4      |
| ENSGALT0000 pleckstrin homology domain containing, family N member       | PLEKHN1      |
| ENSGALT0000 protein tyrosine phosphatase, receptor type, f polypeptide   | PPFIA2       |
| ENSGALT0000 meprin A, beta                                               | MEP1B        |
| ENSGALT0000 envoplakin                                                   | EVPL         |
| ENSGALT0000 glutamate receptor, ionotropic, kainate 2                    | GRIK2        |
| ENSGALT0000 myosin light chain kinase                                    | MYLK         |
| ENSGALT0000 transient receptor potential cation channel, subfamily M, r  | TRPM3        |
| ENSGALT0000 serine/threonine-protein kinase SRPK3-like                   | LOC770936    |
| ENSGALT0000 growth differentiation factor 5                              | GDF5         |
| ENSGALT0000 prospero-related homeobox 1                                  | PROX1        |
| ENSGALT0000 coiled-coil domain containing 60                             | CCDC60       |
| ENSGALT0000 BMP and activin membrane-bound inhibitor homolog (Xer        | BAMBI        |
| ENSGALT0000 sterile alpha motif domain containing 7                      | SAMD7        |
| ENSGALT0000 TRAF-interacting protein with forkhead-associated domai      | TIFA         |
| ENSGALT0000 parvalbumin                                                  | PVALB        |
| ENSGALT0000 thrombospondin, type I, domain containing 4                  | THSD4        |
| ENSGALT0000 melatonin receptor 1A                                        | MTNR1A       |
| ENSGALT0000 frizzled family receptor 10                                  | FZD10        |
| ENSGALT0000 solute carrier family 7 (anionic amino acid transporter ligh | SLC7A11      |
| ENSGALT0000 piezo-type mechanosensitive ion channel component 2          | PIEZO2       |
| ENSGALT0000 interleukin 22 receptor, alpha 1                             | IL22RA1      |
| ENSGALT0000 transmembrane protease, serine 6                             | TMPRSS6      |
| ENSGALT0000 T-box 15                                                     | TBX15        |
| ENSGALT0000 ATPase, Cu <sup>++</sup> transporting, beta polypeptide      | ATP7B        |

|                                                                            |           |
|----------------------------------------------------------------------------|-----------|
| ENSGALT0000 angiopoietin 2                                                 | ANGPT2    |
| ENSGALT0000 solute carrier family 26, member 9                             | SLC26A9   |
| ENSGALT0000 RPE-spondin-like                                               | LOC416923 |
| ENSGALT0000 androgen receptor                                              | AR        |
| ENSGALT0000 family with sequence similarity 107, member A                  | FAM107A   |
| ENSGALT0000 adenylate cyclase 7                                            | ADCY7     |
| ENSGALT0000 amyloid beta (A4) precursor protein-binding, family B, me      | APBB1IP   |
| ENSGALT0000 desmocollin 2                                                  | DSC2      |
| ENSGALT0000 prostaglandin E synthase                                       | PTGES     |
| ENSGALT0000 UBX domain protein 11                                          | UBXN11    |
| ENSGALT0000 leucine-rich repeat containing G protein-coupled receptor      | LGR5      |
| ENSGALT0000 contactin 5                                                    | CNTN5     |
| ENSGALT0000 transmembrane protein 184A                                     | TMEM184A  |
| ENSGALT0000 degenerative spermatocyte homolog 2, lipid desaturase (l       | DEGS2     |
| ENSGALT0000 insulin-like growth factor binding protein 5                   | IGFBP5    |
| ENSGALT0000 DNA-binding protein RFX8-like                                  | LOC418713 |
| ENSGALT0000 nuclear receptor subfamily 2, group E, member 3                | NR2E3     |
| ENSGALT0000 solute carrier family 9 (sodium/hydrogen exchanger), mer       | SLC9A2    |
| ENSGALT0000 lymphoid transcription factor                                  | IKZF3     |
| ENSGALT0000 runt-related transcription factor 2                            | RUNX2     |
| ENSGALT0000 beta-carotene 15,15'-monooxygenase 1                           | BCMO1     |
| ENSGALT0000 geminin coiled-coil domain containing                          | GMNC      |
| ENSGALT0000 wingless-type MMTV integration site family, member 5A          | WNT5A     |
| ENSGALT0000 regulator of G-protein signaling 11                            | RGS11     |
| ENSGALT0000 transient receptor potential cation channel, subfamily M, r    | TRPM6     |
| ENSGALT0000 asporin                                                        | ASPN      |
| ENSGALT0000 tumor necrosis factor receptor superfamily, member 13B         | TNFRSF13B |
| ENSGALT0000 integrin, beta 6                                               | ITGB6     |
| ENSGALT0000 regulator of G-protein signaling 8                             | RGS8      |
| ENSGALT0000 phenylserine dehydratase-like                                  | LOC423635 |
| ENSGALT0000 Arylamine N-acetyltransferase, pineal gland isozyme NAT        | PNAT3     |
| ENSGALT0000 piwi-like 1 (Drosophila)                                       | PIWIL1    |
| ENSGALT0000 delta-like 1 homolog (Drosophila)                              | DLK1      |
| ENSGALT0000 fibroblast growth factor 18                                    | FGF18     |
| ENSGALT0000 FOS-like antigen 2                                             | FOSL2     |
| ENSGALT0000 wingless-type MMTV integration site family, member 8B          | WNT8B     |
| ENSGALT0000 eye-globin                                                     | GBE       |
| ENSGALT0000 anoctamin 9                                                    | ANO9      |
| ENSGALT0000 family with sequence similarity 83, member F                   | FAM83F    |
| ENSGALT0000 solute carrier family 16, member 12 (monocarboxylic acid       | SLC16A12  |
| ENSGALT0000 egl nine homolog 3 (C. elegans)                                | EGLN3     |
| ENSGALT0000 lactate dehydrogenase A                                        | LDHA      |
| ENSGALT0000 ADAM metallopeptidase with thrombospondin type 1 moti          | ADAMTS1   |
| ENSGALT0000 cytidine deaminase                                             | CDD       |
| ENSGALT0000 sortilin-related VPS10 domain containing receptor 3            | SORCS3    |
| ENSGALT0000 solute carrier organic anion transporter family, member 2/     | SLCO2A1   |
| ENSGALT0000 solute carrier family 1 (high affinity aspartate/glutamate tr; | SLC1A6    |
| ENSGALT0000 potassium large conductance calcium-activated channel, KCNMB4  |           |

|                                                                                            |           |
|--------------------------------------------------------------------------------------------|-----------|
| ENSGALT0000 5-hydroxytryptamine (serotonin) receptor 1A                                    | HTR1A     |
| ENSGALT0000 cytokine-like 1                                                                | CYTL1     |
| ENSGALT0000 E74-like factor 5 (ets domain transcription factor)                            | ELF5      |
| ENSGALT0000 aquaporin 5                                                                    | AQP5      |
| ENSGALT0000 doublesex and mab-3 related transcription factor 3                             | DMRT3     |
| ENSGALT0000 glutamate decarboxylase 1 (brain, 67kDa)                                       | GAD1      |
| ENSGALT0000 polymerase (DNA directed) nu                                                   | POLN      |
| ENSGALT0000 Retinal homeobox protein Rx1                                                   | RAX       |
| ENSGALT0000 isthmin 1 homolog (zebrafish)                                                  | ISM1      |
| ENSGALT0000 solute carrier family 39 (zinc transporter), member 12                         | SLC39A12  |
| ENSGALT0000 cadherin 13, H-cadherin (heart)                                                | CDH13     |
| ENSGALT0000 insulin-like growth factor binding protein, acid labile subunit                | IGFALS    |
| ENSGALT0000 coiled-coil domain containing 78                                               | CCDC78    |
| ENSGALT0000 N-acetyltransferase, liver isozyme                                             | NAT       |
| ENSGALT0000 leucine-rich repeat, immunoglobulin-like and transmembrane protein             | LRIT1     |
| ENSGALT0000 family with sequence similarity 83, member A                                   | FAM83A    |
| ENSGALT0000 solute carrier family 38, member 5                                             | SLC38A5   |
| ENSGALT0000 phosphoenolpyruvate carboxykinase 1 (soluble)                                  | PCK1      |
| ENSGALT0000 tubby like protein 1                                                           | TULP1     |
| ENSGALT0000 hedgehog interacting protein                                                   | HHIP      |
| ENSGALT0000 hydroxyacid oxidase 2 (long chain)                                             | HAO2      |
| ENSGALT0000 ADAMTS-like 5                                                                  | ADAMTSL5  |
| ENSGALT0000 calcyphosine-like                                                              | CAPSL     |
| ENSGALT0000 integrin, beta-like 1 (with EGF-like repeat domains)                           | ITGBL1    |
| ENSGALT0000 fibroblast growth factor receptor 3                                            | FGFR3     |
| ENSGALT0000 potassium voltage-gated channel, subfamily F, member 1                         | KCNF1     |
| ENSGALT0000 G protein-coupled receptor 133                                                 | GPR133    |
| ENSGALT0000 WNT1 inducible signaling pathway protein 1                                     | WISP1     |
| ENSGALT0000 mannose receptor, C type 2-like                                                | LOC418836 |
| ENSGALT0000 noggin                                                                         | NOG       |
| ENSGALT0000 fibrinogen-like protein 1-like                                                 | LOC428073 |
| ENSGALT0000 galanin receptor type 1-like                                                   | LOC415713 |
| ENSGALT0000 SRY (sex determining region Y)-box 14                                          | SOX14     |
| ENSGALT0000 zinc finger protein 488                                                        | ZNF488    |
| ENSGALT0000 retinal G protein coupled receptor                                             | RGR       |
| ENSGALT0000 hepatocyte growth factor (hepatopoietin A; scatter factor)                     | HGF       |
| ENSGALT0000 immunoglobulin-like and fibronectin type III domain containing protein         | IGFN1     |
| ENSGALT0000 serpin peptidase inhibitor, clade A (alpha-1 antitrypsin) subfamily B member 1 | SERPINA3  |
| ENSGALT0000 troponin T type 2 (cardiac)                                                    | TNNT2     |
| ENSGALT0000 leucine-rich repeats and transmembrane domains 1                               | LRTM1     |
| ENSGALT0000 tectorin beta                                                                  | TECTB     |
| ENSGALT0000 cytochrome P450, family 26, subfamily C, polypeptide 1                         | CYP26C1   |
| ENSGALT0000 polycystic kidney disease 2-like 1                                             | PKD2L1    |
| ENSGALT0000 calcium channel, voltage-dependent, T type, alpha 1I subunit                   | CACNA1I   |
| ENSGALT0000 choline O-acetyltransferase                                                    | CHAT      |
| ENSGALT0000 ABI family, member 3 (NESH) binding protein                                    | ABI3BP    |
| ENSGALT0000 goosecoid homeobox 2                                                           | GSC2      |
| ENSGALT0000 apolipoprotein A-I                                                             | APOA1     |

ENSGALT0000 von Willebrand factor D and EGF domains  
ENSGALT0000 olfactomedin 4  
ENSGALT0000 adrenergic, alpha-1B-, receptor  
ENSGALT0000 matrix metalloproteinase 27  
ENSGALT0000 spermatid associated  
ENSGALT0000 transmembrane inner ear  
ENSGALT0000 thyroid stimulating hormone receptor

VWDE  
OLFM4  
ADRA1B  
MMP27  
SPERT  
TMIE  
TSHR

| Function?          | abundance class | distal | Distal PMMR | Mid PMMR | Prox PMMR |
|--------------------|-----------------|--------|-------------|----------|-----------|
| CHEMOKINE          | very low        |        | 1.12497E-05 | 5.83652  | 8.6526    |
|                    | very low        |        | 1.5         | 3.5      | 170.5     |
|                    | very low        |        | 1           | 5.5      | 105.5     |
| CHANNEL            | very low        |        | 2.5         | 12.5     | 227.5     |
|                    | very low        |        | 0.0621046   | 5.11756  | 5.27348   |
| TF                 | medium          |        | 16          | 122.5    | 1330.5    |
|                    | medium          |        | 21.2348     | 97.008   | 775.499   |
|                    | medium          |        | 27.5        | 64.5     | 873       |
| CHOLINERGIC RECEPT | very low        |        | 2.5         | 10.5     | 72.5      |
|                    | very low        |        | 1           | 2.5      | 27        |
|                    | low             |        | 7           | 36.5     | 187       |
| CHANNEL            | very low        |        | 4           | 10       | 99.5      |
|                    | very low        |        | 0.5         | 2.5      | 11        |
|                    | low             |        | 9           | 16       | 163       |
| MYOSIN/WNT         | very low        |        | 0.5         | 3        | 9         |
|                    | very low        |        | 0.5         | 3.5      | 9         |
|                    | very low        |        | 0.5         | 1        | 8.5       |
| TF                 | very low        |        | 1           | 4.5      | 17        |
|                    | very low        |        | 1.5         | 22.138   | 24.9729   |
|                    | high            |        | 126.369     | 592.586  | 2059.17   |
| RA                 | very high       |        | 725         | 741      | 11619     |
| WNT                | medium          |        | 15          | 34       | 236       |
|                    | very low        |        | 4           | 21       | 62        |
|                    | very low        |        | 4.5         | 18.5     | 69        |
| TGFB/BMP           | very low        |        | 2.5         | 5.5      | 38        |
| SOLUTE CARRIER     | very low        |        | 0.5         | 3        | 7.5       |
|                    | very low        |        | 3.5         | 4        | 51        |
|                    | very low        |        | 1           | 11.5     | 14.5      |
| WNT                | very low        |        | 1.5         | 2        | 20.5      |
|                    | low             |        | 6           | 51       | 81.5      |
|                    | very low        |        | 0.5         | 3.5      | 6.5       |
| TGFB/BMP           | very low        |        | 1.5         | 7        | 18.5      |
|                    | medium          |        | 14.5        | 26       | 178       |
|                    | very low        |        | 0.5         | 5.5      | 6         |
| TRANSMEMB PROT     | very low        |        | 0.5         | 2        | 6         |
|                    | medium          |        | 10.5        | 18       | 124       |
|                    | medium          |        | 29.5        | 68.5     | 341.501   |
| MYOSIN             | very low        |        | 1.68312     | 22.815   | 19.4289   |
|                    | very low        |        | 1           | 3        | 11.5      |
|                    | very low        |        | 0.5         | 5        | 5.5       |
| SOLUTE CARRIER     | very low        |        | 0.5         | 4        | 5.5       |
|                    | medium-high     |        | 37.5        | 159      | 404       |
|                    | very low        |        | 3.91374     | 21.3863  | 42.1213   |
| TGFB/BMP           | very low        |        | 2           | 10.5     | 21.5      |
|                    | high            |        | 103         | 145      | 1104      |
|                    | low             |        | 5           | 11.649   | 53.298    |
| TGFB/BMP           | low             |        | 5           | 11.649   | 53.298    |
|                    | very low        |        | 4           | 15       | 42.5      |

|                  |             |          |         |         |         |
|------------------|-------------|----------|---------|---------|---------|
| TF/WNT           | high        | 259.5    | 1711    | 2709.5  |         |
| CYTOKINE         | very low    | 0.5      | 1       | 5       |         |
|                  | very low    | 0.5      | 3.5     | 5       |         |
|                  | very low    | 2        | 2.5     | 20      |         |
|                  | very low    | 2.5      | 14.5    | 25      |         |
| TF               | very low    | 0.5      | 2.5     | 5       |         |
|                  | very low    | 0.602958 | 1.26535 | 6       |         |
|                  | low         | 5.5      | 9       | 53      |         |
| TF               | medium-high | 43.5     | 275.5   | 418.5   |         |
| SOLUTE CARRIER   | very low    | 2.5      | 10      | 24      |         |
| TF               | medium      | 15.5     | 17.5    | 144.5   |         |
|                  | high        | 62       | 343     | 565.5   |         |
|                  | medium      | 24.5     | 63      | 221     |         |
|                  | very low    | 1        | 6       | 9       |         |
|                  | very low    | 1        | 4.5     | 9       |         |
|                  | high        | 126.5    | 351.5   | 1136    |         |
|                  | very low    | 2        | 12.5    | 17.5    |         |
|                  | high        | 74       | 257     | 643.999 |         |
|                  | EMT         | medium   | 28      | 123.5   | 240.5   |
|                  | CHANNEL     | high     | 65.5    | 414.5   | 560.5   |
| low              |             | 6.5      | 43.5    | 55.5    |         |
| medium-high      |             | 33.5     | 72      | 274.999 |         |
| METALLOPEPTIDASE | high        | 148.5    | 843.5   | 1218    |         |
|                  | very low    | 1        | 6       | 8       |         |
| TGFB/BMP         | low         | 7        | 15.5    | 56      |         |
|                  | very high   | 4612.66  | 28000.5 | 36516.1 |         |
|                  | high        | 54       | 192.5   | 426.5   |         |
|                  | medium      | 14.5     | 90      | 114     |         |
|                  | high        | 94.5     | 516     | 734     |         |
|                  | low         | 8.5      | 49.5    | 66      |         |
|                  | very low    | 2        | 7.5     | 15.5    |         |
|                  | high        | 288.5    | 954.5   | 2194    |         |
|                  | very low    | 2.5      | 11      | 19      |         |
|                  | very low    | 1        | 3.5     | 7.5     |         |
|                  | TF          | high     | 99.9999 | 469     | 740.499 |
|                  | TF          | very low | 2.5     | 11.5    | 18.5    |
| TF               | very low    | 1.5      | 5       | 11      |         |
|                  | very low    | 4        | 11.5    | 29      |         |
|                  | medium      | 22       | 74      | 159     |         |
| SOLUTE CARRIER   | high        | 97.5001  | 745.999 | 692.496 |         |
| WNT              | medium      | 10.5     | 14.5    | 74      |         |
| TF               | medium      | 14.5     | 27.5    | 102     |         |
| TF               | high        | 85.5     | 498.5   | 590.5   |         |
|                  | very low    | 3        | 6       | 20.5    |         |
|                  | medium      | 21       | 64      | 143.5   |         |
| TF               | medium-high | 30       | 158.5   | 202.5   |         |
|                  | medium      | 27       | 217.5   | 181.5   |         |
|                  | medium-high | 47       | 187     | 310.5   |         |



|                    |             |         |         |         |
|--------------------|-------------|---------|---------|---------|
|                    | high        | 105.5   | 129     | 686.5   |
|                    | very low    | 1       | 5.5     | 6.5     |
|                    | very low    | 1       | 2.5     | 6.5     |
|                    | very low    | 1       | 2.5     | 6.5     |
| TF                 | very low    | 1       | 2       | 6.5     |
|                    | very low    | 1       | 2.5     | 6.5     |
|                    | very low    | 2.5     | 7       | 16      |
|                    | very low    | 2.5     | 8.5     | 16      |
|                    | high        | 290     | 1472.5  | 1850.5  |
|                    | very low    | 3       | 14      | 19      |
|                    | very low    | 1.5     | 8       | 9.5     |
| CHANNEL            | medium      | 26      | 68      | 164.5   |
|                    | medium      | 17      | 48.5    | 106.5   |
|                    | very low    | 2       | 7.5     | 12.5    |
|                    | very low    | 2       | 8       | 12.5    |
|                    | very low    | 2       | 4.5     | 12.5    |
| SOLUTE CARRIER     | very low    | 3       | 4       | 18.5    |
|                    | high        | 375.5   | 1093    | 2315.5  |
| CHANNEL            | high        | 72.5    | 444     | 446.5   |
| CHOLINERGIC RECEPT | high        | 312     | 682.5   | 1899    |
|                    | medium      | 13      | 28      | 79      |
| CHOLINERGIC RECEPT | high        | 91.8804 | 204.653 | 554.986 |
|                    | medium      | 26.5    | 33      | 159.5   |
|                    | high        | 66      | 126     | 396.5   |
|                    | very low    | 3.5     | 13.5    | 21      |
|                    | very low    | 1       | 5       | 6       |
|                    | very low    | 1       | 4       | 6       |
|                    | very low    | 2       | 10      | 12      |
|                    | very low    | 2       | 7.5     | 12      |
|                    | high        | 80      | 317     | 473     |
|                    | very low    | 1.85995 | 3.62096 | 10.9222 |
|                    | very high   | 1243.5  | 3702.5  | 7290    |
| TRANSMEMB PROT     | high        | 57.5    | 77.5    | 336.5   |
| COLLAGEN           | medium      | 10      | 48      | 58.5    |
| WNT                | medium-high | 40.5    | 188     | 236.5   |
|                    | low         | 6       | 11.5    | 35      |
|                    | high        | 73.5    | 382.5   | 428     |
|                    | high        | 95      | 238     | 552.5   |
|                    | very low    | 2.5     | 8.5     | 14.5    |
| CYTOKINE           | very low    | 1.5     | 4       | 8.5     |
|                    | low         | 9.05905 | 30.2387 | 50.9207 |
|                    | low         | 9.94987 | 18.8019 | 55.8795 |
|                    | low         | 9       | 32      | 50      |
|                    | very high   | 841     | 3331.13 | 4667.32 |
|                    | medium      | 29.5    | 58      | 163.5   |
|                    | high        | 84      | 147.059 | 462.884 |
| TF                 | high        | 143.5   | 620.5   | 790     |
|                    | very low    | 1       | 1.5     | 5.5     |

|                |             |         |         |         |
|----------------|-------------|---------|---------|---------|
|                | very low    | 1       | 2       | 5.5     |
| RECEPTOR       | low         | 9       | 25.5    | 49      |
|                | medium      | 10      | 25.5    | 53.5    |
|                | very low    | 1.5     | 7       | 8       |
| NOTCH          | high        | 121     | 466     | 638     |
|                | medium      | 13      | 42      | 68.5    |
|                | high        | 248.5   | 1254.5  | 1302.5  |
| TF             | high        | 60.9955 | 187.941 | 319.584 |
| SOLUTE CARRIER | medium      | 29      | 75      | 151.5   |
|                | very high   | 823.5   | 3730    | 4287    |
|                | medium      | 23.5609 | 34.9135 | 122.57  |
|                | very high   | 1189    | 2458.03 | 6147.73 |
|                | high        | 407.5   | 1331.5  | 2104    |
| EMT/WNT        | high        | 165.014 | 381.521 | 848.006 |
|                | medium      | 27      | 100     | 138     |
|                | very low    | 4.5     | 14.5    | 23      |
|                | medium      | 20.5    | 98      | 104.5   |
| TF             | medium-high | 31.6307 | 40.4107 | 159.83  |
|                | high        | 159.031 | 513.652 | 803.131 |
|                | high        | 223     | 1045.5  | 1123    |
|                | high        | 96.5    | 360.5   | 485     |
| RA             | high        | 279.501 | 1034.5  | 1400.51 |
|                | very low    | 1       | 1.5     | 5       |
|                | medium      | 21.5    | 101.5   | 107.5   |
|                | very low    | 2       | 5.5     | 10      |
|                | very low    | 1       | 2       | 5       |
|                | very low    | 1       | 2.5     | 5       |
| TF             | very low    | 3       | 7       | 15      |
| COLLAGEN       | high        | 237.5   | 328     | 1178.5  |
|                | medium-high | 41      | 88.0001 | 203     |
|                | high        | 181     | 609.5   | 893.5   |
|                | medium      | 25.9142 | 65.3249 | 127.305 |
| SOLUTE CARRIER | high        | 125     | 545     | 612     |
| KINASE         | medium-high | 32.5    | 56      | 159     |
|                | high        | 54.5    | 64      | 266.5   |
| KINASE         | high        | 139     | 400.5   | 677     |
|                | high        | 91.5    | 253     | 443.5   |
|                | medium-high | 42      | 99.5    | 202     |
|                | medium      | 10.5    | 26      | 50.5    |
|                | very high   | 1005.5  | 4236.4  | 4833.48 |
| RECEPTOR       | low         | 5       | 17.5    | 24      |
| TF             | low         | 5       | 10      | 24      |
|                | high        | 57      | 130.5   | 273.5   |
|                | medium-high | 36.9664 | 99.6137 | 177.267 |
|                | medium      | 18.5    | 64      | 88.5    |
|                | very high   | 1804.5  | 8019.2  | 8630.93 |
|                | medium-high | 35.5    | 155     | 169.5   |
|                | high        | 457.969 | 1586.47 | 2182.31 |

|                |             |         |         |         |
|----------------|-------------|---------|---------|---------|
| 81             | low         | 9.92937 | 27.5798 | 47.2369 |
| TF             | very low    | 4       | 9       | 19      |
|                | high        | 232.5   | 479     | 1102    |
| TF             | medium      | 11      | 36      | 52      |
| EMT            | low         | 9       | 38      | 42.5    |
|                | medium-high | 37.5    | 150.5   | 177     |
|                | medium      | 22.5    | 101     | 106     |
| TF/WNT         | high        | 149.5   | 514.5   | 704     |
|                | high        | 153     | 686     | 719.5   |
| TF             | very low    | 2.50842 | 3.00509 | 11.7346 |
|                | very low    | 1.5     | 5.5     | 7       |
|                | very low    | 1.5     | 3.5     | 7       |
|                | very low    | 4.5     | 12      | 21      |
| WNT            | medium      | 18.5    | 43.5    | 86      |
|                | high        | 233     | 543     | 1080.5  |
|                | very low    | 4       | 13.5    | 18.5    |
|                | very low    | 2.5     | 9       | 11.5    |
| TF             | very low    | 2.5     | 9       | 11.5    |
|                | high        | 147     | 555.999 | 672.497 |
|                | high        | 62.5    | 105.5   | 285.5   |
| FGF            | high        | 139.5   | 620.5   | 634.995 |
|                | medium      | 18.5    | 59      | 84      |
|                | medium-high | 30.6299 | 78.4669 | 138.126 |
|                | medium      | 17      | 61.5    | 76.5    |
|                | high        | 65.5    | 248     | 292     |
| TF/WNT         | high        | 462     | 1318.5  | 2053    |
|                | medium-high | 45.5    | 195     | 201.5   |
| SOLUTE CARRIER | very low    | 3.5     | 16.5    | 15.5    |
| TF             | high        | 50      | 94.5    | 221     |
|                | very low    | 2.5     | 5.5     | 11      |
|                | high        | 358.5   | 847     | 1573    |
| TF             | high        | 122     | 226.5   | 533.5   |
|                | high        | 116.5   | 285.5   | 509     |
|                | high        | 158.5   | 301.5   | 689.005 |
|                | high        | 75.5    | 297     | 328     |
|                | high        | 154.5   | 630.5   | 670     |
|                | very low    | 1.5     | 4.5     | 6.5     |
|                | very low    | 1.5     | 6       | 6.5     |
| SOLUTE CARRIER | very low    | 1.5     | 3       | 6.5     |
|                | medium-high | 45.5    | 218     | 196.5   |
|                | high        | 57.5    | 121.5   | 248     |
|                | low         | 6.5     | 14      | 28      |
| WNT            | medium      | 10.5    | 23.5    | 45      |
|                | very low    | 3.5     | 4       | 15      |
|                | medium      | 12.5    | 15      | 53.5    |
|                | low         | 9       | 25.5    | 38.5    |
| RECEPTOR       | high        | 114     | 549     | 487     |
|                | very high   | 1755.49 | 4059.01 | 7492.95 |

|                |             |         |         |         |
|----------------|-------------|---------|---------|---------|
|                | low         | 9.5     | 47      | 40.5    |
|                | very high   | 852.5   | 2261    | 3627.5  |
|                | very low    | 2       | 5       | 8.5     |
|                | very low    | 4.5     | 13.5    | 19      |
|                | medium      | 11.5    | 25      | 48.5    |
|                | medium-high | 44      | 88.5    | 185.5   |
|                | very high   | 1586    | 4908    | 6677    |
|                | low         | 5       | 17      | 21      |
| TRANSMEMB PROT | high        | 258     | 1005.5  | 1081.5  |
| CADHERIN/WNT   | medium      | 16.5    | 58      | 69      |
| TF/WNT         | high        | 136     | 494.5   | 568.5   |
|                | very low    | 3       | 8       | 12.5    |
|                | low         | 6       | 8       | 25      |
|                | medium-high | 41      | 70      | 170     |
|                | medium-high | 40      | 73.8935 | 165.5   |
|                | low         | 8       | 17      | 33      |
|                | very low    | 4       | 6.5     | 16.5    |
|                | high        | 158.5   | 406     | 652     |
|                | high        | 222     | 789     | 913.004 |
|                | medium      | 15      | 70      | 61.5    |
| CHANNEL        | high        | 62.5    | 81.5    | 255.5   |
|                | high        | 124     | 224.5   | 506     |
|                | high        | 126     | 483.569 | 513.593 |
| TF             | high        | 458     | 1015    | 1857.5  |
|                | medium      | 19.8586 | 57.5859 | 80.2418 |
| FGF?           | high        | 171.5   | 649.5   | 692.5   |
|                | high        | 58.5    | 216     | 236     |
| RECEPTOR       | high        | 201.5   | 364.5   | 806.5   |
|                | low         | 5.5     | 17.5    | 22      |
| RECEPTOR       | very low    | 1.5     | 5.5     | 6       |
|                | very low    | 4       | 9       | 16      |
| TF             | very low    | 1.5     | 3.5     | 6       |
|                | very low    | 2       | 6       | 8       |
|                | very low    | 2.5     | 5       | 10      |
|                | very low    | 1.5     | 3.5     | 6       |
|                | high        | 102     | 278.5   | 406.5   |
| CHANNEL        | medium      | 28      | 84      | 111.5   |
|                | high        | 183     | 570.5   | 727.993 |
|                | high        | 239.743 | 483.661 | 952.503 |
| TRANSMEMB PROT | high        | 163.422 | 287.376 | 646.82  |
|                | high        | 261.5   | 732     | 1034    |
| TF             | high        | 296     | 801.494 | 1167.52 |
|                | medium      | 26      | 36.5    | 102.5   |
|                | high        | 74      | 281.5   | 291.5   |
|                | high        | 155.5   | 490     | 611.5   |
|                | high        | 65.4716 | 149.5   | 255.988 |
|                | medium-high | 33      | 64.5    | 129     |
|                | high        | 98      | 370     | 382.5   |

|                |             |         |         |         |
|----------------|-------------|---------|---------|---------|
| CHANNEL        | high        | 97      | 181     | 378     |
| TGFB/BMP/WNT   | high        | 203.5   | 369.998 | 792.009 |
|                | medium      | 13.5    | 27      | 52.5    |
|                | high        | 195.034 | 852.387 | 758.232 |
|                | high        | 466.498 | 1366.5  | 1807.49 |
| COLLAGEN       | very high   | 978.004 | 1532.5  | 3786.98 |
|                | high        | 91.5    | 228     | 354     |
|                | medium-high | 37.5    | 120     | 144     |
|                | medium      | 17      | 42      | 65      |
|                | medium      | 14      | 37      | 53.5    |
| TF             | medium      | 24.5    | 46      | 93.5    |
|                | high        | 89.5    | 273.5   | 341.5   |
|                | medium-high | 30.602  | 62.1887 | 116.341 |
|                | high        | 414.501 | 1301    | 1572.99 |
|                | medium      | 14.5    | 41.5    | 55      |
|                | medium      | 28.5    | 84.5    | 108     |
|                | medium-high | 39      | 146.5   | 147.5   |
|                | very low    | 4.5     | 6       | 17      |
|                | very low    | 4.5     | 14.5    | 17      |
|                | very high   | 4795.5  | 9101.5  | 18100.5 |
| CHANNEL        | low         | 8.5     | 12.5    | 32      |
|                | medium-high | 38      | 117.5   | 143     |
|                | high        | 97.5    | 180.5   | 366.5   |
|                | high        | 126.5   | 494     | 474.5   |
|                | very low    | 2       | 2.5     | 7.5     |
|                | very low    | 2       | 3.5     | 7.5     |
|                | high        | 458.999 | 1145.5  | 1718.5  |
|                | high        | 478.5   | 864.5   | 1778.5  |
|                | very low    | 3.5     | 9.5     | 13      |
|                | low         | 8.5     | 26      | 31.5    |
|                | medium      | 17      | 39.5    | 63      |
| TF             | high        | 348     | 1071.5  | 1285.98 |
| SOLUTE CARRIER | high        | 483.04  | 1694.36 | 1784.44 |
|                | very high   | 833.5   | 2814    | 3077.5  |
|                | low         | 9.5     | 14      | 35      |
|                | high        | 297.5   | 1094    | 1095.5  |
| TF             | high        | 82.5    | 289     | 303.5   |
|                | high        | 122.5   | 303.5   | 450.5   |
|                | high        | 56      | 144.043 | 205.553 |
| KINASE         | very low    | 1.5     | 4       | 5.5     |
|                | medium      | 24      | 71      | 88      |
| SOLUTE CARRIER | very low    | 1.5     | 4       | 5.5     |
|                | high        | 65.5    | 129.5   | 239.5   |
|                | high        | 160     | 494     | 584.5   |
|                | medium      | 14      | 35      | 51      |
| SOLUTE CARRIER | low         | 5.5     | 14      | 20      |
|                | high        | 108     | 146     | 392     |
| NOTCH          | medium      | 12      | 37.5    | 43.5    |

|                    |             |         |         |         |
|--------------------|-------------|---------|---------|---------|
|                    | very high   | 3771.04 | 6403.86 | 13664.7 |
|                    | very high   | 1954.19 | 3663.32 | 7076.84 |
|                    | very high   | 2177.53 | 3712.08 | 7880.19 |
|                    | low         | 7.49221 | 20.1103 | 27.0748 |
|                    | high        | 157     | 325.5   | 566.5   |
|                    | high        | 70      | 134     | 252.501 |
|                    | medium      | 20      | 53      | 72      |
| RECEPTOR           | very high   | 698.505 | 2569.53 | 2507.5  |
| TF                 | high        | 323.489 | 798.12  | 1158.4  |
|                    | medium-high | 46.5    | 158     | 166.5   |
|                    | medium      | 10.5    | 28      | 37.5    |
| MYOSIN             | high        | 85      | 182.5   | 303.5   |
|                    | medium      | 11.5    | 29.5    | 41      |
|                    | medium      | 11.5    | 16.5    | 41      |
|                    | high        | 238.5   | 521.5   | 850     |
|                    | low         | 5.5     | 12      | 19.5    |
|                    | very high   | 703     | 2336.98 | 2488.01 |
|                    | high        | 79      | 133.5   | 279.5   |
|                    | very high   | 4562.5  | 14290.5 | 16122   |
|                    | high        | 191     | 291.5   | 674     |
|                    | high        | 106     | 278.5   | 372.5   |
| CHANNEL            | high        | 78.5    | 243.5   | 275.5   |
|                    | high        | 62      | 157.5   | 217     |
|                    | very low    | 3       | 5       | 10.5    |
|                    | very low    | 4       | 10.5    | 14      |
| TF                 | very low    | 2       | 5       | 7       |
|                    | high        | 168     | 252.5   | 587.5   |
| TF                 | high        | 157     | 340.5   | 549     |
|                    | high        | 157.5   | 431     | 549     |
| TF                 | high        | 228.902 | 739.369 | 795.88  |
|                    | very high   | 644.502 | 1968.98 | 2238.51 |
|                    | high        | 66      | 166     | 229     |
|                    | high        | 234     | 622.007 | 811     |
|                    | high        | 115.5   | 223     | 399.999 |
|                    | high        | 147     | 399.5   | 508.5   |
|                    | high        | 255     | 850     | 881.5   |
|                    | high        | 60.5    | 137.5   | 209     |
|                    | very high   | 571.5   | 862     | 1974    |
|                    | medium-high | 36.5    | 56.5    | 125.5   |
|                    | low         | 7       | 22.5    | 24      |
| CHOLINERGIC RECEPT | high        | 158     | 229.5   | 541.5   |
| TF                 | medium      | 13      | 44.5    | 44.5    |
|                    | very high   | 806.5   | 2178    | 2754.5  |
|                    | high        | 58      | 147.5   | 198     |
|                    | high        | 129     | 282.5   | 440     |
| KINASE             | high        | 74.5    | 202     | 254     |
| METALLOPEPTIDASE   | medium      | 20.3958 | 35.7148 | 69.3893 |
|                    | very low    | 2.5     | 4.5     | 8.5     |

|                    |             |         |         |         |
|--------------------|-------------|---------|---------|---------|
|                    | medium-high | 36      | 111     | 122     |
| TF                 | medium-high | 39.5763 | 97.5549 | 134.085 |
| METALLOPEPTIDASE   | high        | 303     | 639     | 1026.5  |
|                    | medium-high | 31.1537 | 53.8695 | 105.245 |
|                    | very low    | 4       | 6       | 13.5    |
|                    | very high   | 672     | 2090    | 2266    |
|                    | medium-high | 38      | 85.4908 | 128.06  |
|                    | high        | 283.5   | 811.001 | 954.997 |
| CADHERIN/WNT       | high        | 57      | 120.5   | 192     |
|                    | high        | 90.5    | 208     | 304.5   |
|                    | high        | 253.499 | 726.999 | 851.995 |
|                    | medium-high | 39      | 92      | 131     |
|                    | medium      | 17.5    | 50      | 58.5    |
| TF                 | medium      | 10.5    | 13      | 35      |
|                    | very low    | 4.5     | 6       | 15      |
|                    | very low    | 1.5     | 3.5     | 5       |
| KINASE INHIB       | very low    | 3       | 7.5     | 10      |
|                    | very low    | 1.5     | 4.5     | 5       |
|                    | very high   | 983.845 | 2423.53 | 3277.31 |
|                    | very high   | 695     | 1760.5  | 2313.5  |
|                    | high        | 266.5   | 790.5   | 887     |
|                    | very high   | 531.5   | 1032    | 1769    |
| TF                 | medium-high | 35.5    | 104     | 118     |
|                    | very high   | 1485.33 | 4081.47 | 4928.74 |
| TF                 | high        | 380     | 544.732 | 1256.44 |
|                    | very high   | 813.997 | 2553.96 | 2688.48 |
|                    | medium      | 26.5    | 69      | 87.5    |
| CHOLINERGIC RECEPT | medium      | 20      | 62      | 66      |
| TF                 | high        | 59      | 123.5   | 194.5   |
|                    | high        | 68      | 231     | 223.5   |
|                    | medium      | 23      | 51      | 75.5    |
|                    | high        | 75.4213 | 189.175 | 246.584 |
|                    | medium      | 22.5    | 52.5    | 73.5    |
| TF                 | low         | 6       | 13      | 19.5    |
|                    | very low    | 2       | 2.5     | 6.5     |
|                    | high        | 98.5    | 267.5   | 319.5   |
| WNT                | high        | 144.5   | 470.5   | 467.5   |
| MYOSIN             | medium-high | 34.3479 | 49.3499 | 110.932 |
|                    | medium-high | 42.5    | 90      | 137     |
|                    | very high   | 2712.94 | 5197.46 | 8743.68 |
|                    | very low    | 4.5     | 14      | 14.5    |
| KINASE             | medium      | 11.5    | 18      | 37      |
| TF/EMT             | very high   | 968     | 2510    | 3110.5  |
| CADHERIN/WNT       | high        | 122     | 147.5   | 392     |
|                    | high        | 99.5    | 262     | 319.5   |
|                    | medium-high | 41      | 76      | 131.5   |
|                    | very high   | 962.035 | 1595.2  | 3083.56 |
|                    | high        | 244     | 446.5   | 782     |

|                    |             |         |         |         |
|--------------------|-------------|---------|---------|---------|
|                    | very low    | 2.5     | 6.5     | 8       |
|                    | very high   | 1582    | 3839.5  | 5056.5  |
| WNT                | very high   | 4890.52 | 13732.2 | 15628.6 |
| TF                 | medium-high | 48.5    | 73.5    | 154.5   |
| KINASE INHIB       | medium      | 11      | 24.5    | 35      |
| TF                 | high        | 82.0803 | 102.037 | 260.5   |
|                    | high        | 79.5    | 214     | 252     |
|                    | low         | 6       | 14      | 19      |
| COLLAGEN           | very high   | 1442.99 | 2224.94 | 4567.25 |
|                    | high        | 125     | 271.5   | 395     |
|                    | very low    | 3.5     | 4.5     | 11      |
| TF                 | very low    | 3.5     | 10      | 11      |
| TF/RA              | high        | 385.218 | 1018.24 | 1209.23 |
|                    | medium      | 14.5    | 26.5    | 45.5    |
|                    | medium-high | 40.5    | 112.5   | 127     |
|                    | medium-high | 35      | 54.5    | 109.5   |
| MYOSIN             | very high   | 1435.5  | 3552.47 | 4487.47 |
|                    | high        | 119.5   | 285     | 373.498 |
|                    | high        | 168     | 353.5   | 525     |
| TF                 | very low    | 4       | 7       | 12.5    |
|                    | high        | 276.001 | 676     | 860.996 |
|                    | high        | 497     | 1503    | 1546.5  |
|                    | medium      | 14      | 42      | 43.5    |
|                    | high        | 222.5   | 499.5   | 691     |
|                    | high        | 63      | 158     | 195     |
| CHANNEL            | high        | 54      | 143.5   | 167     |
| METALLOPEPTIDASE/I | high        | 203.5   | 409     | 628.5   |
|                    | medium-high | 40.5    | 84.5    | 125     |
|                    | medium-high | 37.5    | 63.5    | 115.5   |
|                    | medium      | 24.1179 | 37.9517 | 74.0882 |
|                    | high        | 78.5    | 159.5   | 241     |
|                    | very high   | 4185.47 | 11525.9 | 12825.9 |
|                    | medium-high | 37      | 64      | 113     |
|                    | high        | 185.5   | 613.501 | 566.499 |
|                    | very high   | 8182.14 | 14311.2 | 24952.5 |
|                    | high        | 52.5    | 170.5   | 160     |
|                    | high        | 59      | 147     | 179.5   |
|                    | high        | 200     | 510     | 607     |
| TF                 | medium      | 15      | 37      | 45.5    |
| TF/NOTCH           | high        | 237.675 | 443.824 | 720.724 |
|                    | medium-high | 34      | 80      | 103     |
|                    | high        | 451.5   | 877.5   | 1367    |
|                    | high        | 75.5    | 109.5   | 228.5   |
|                    | medium      | 19      | 30.5    | 57.5    |
| CHANNEL            | high        | 149.5   | 420.5   | 452     |
|                    | high        | 56.5    | 148     | 170.5   |
| TGFB/BMP           | high        | 130.5   | 312     | 393.5   |
|                    | high        | 54      | 188.5   | 162.5   |



|                    |             |         |         |         |
|--------------------|-------------|---------|---------|---------|
|                    | very high   | 4173.96 | 7468.53 | 12559.9 |
|                    | high        | 204.5   | 596.5   | 614     |
|                    | very low    | 2.5     | 3.5     | 7.5     |
|                    | high        | 54      | 123.5   | 162     |
|                    | medium-high | 37      | 67      | 111     |
|                    | medium      | 16      | 25      | 48      |
|                    | very low    | 2.5     | 4       | 7.5     |
|                    | low         | 5.5     | 9       | 16.5    |
| TRANSMEMB PROT     | very low    | 3       | 4.5     | 9       |
| TF                 | high        | 87.5    | 265.5   | 262     |
|                    | high        | 114.185 | 286.45  | 341.521 |
|                    | very high   | 30358.5 | 89052.4 | 90753.7 |
|                    | high        | 200     | 519.5   | 597     |
|                    | high        | 77      | 95.5    | 229.5   |
| CHANNEL            | very high   | 2326.5  | 5754    | 6934    |
|                    | high        | 96.955  | 275.322 | 288.653 |
|                    | high        | 154     | 221     | 457     |
|                    | high        | 292.5   | 685     | 867.5   |
|                    | high        | 452.5   | 1280    | 1337.5  |
|                    | high        | 346     | 740     | 1022.5  |
|                    | high        | 219.5   | 491     | 648.5   |
|                    | high        | 106     | 196.5   | 313     |
| CHANNEL            | very high   | 1087    | 2734    | 3208.5  |
|                    | high        | 59.5    | 78      | 175.5   |
| CHANNEL            | high        | 88.5001 | 239.001 | 261     |
|                    | medium      | 18.5    | 26.5    | 54.5    |
| CHOLINERGIC RECEPT | very high   | 2518.95 | 6867.75 | 7406.01 |
| METALLOPEPTIDASE   | low         | 8       | 15      | 23.5    |
|                    | high        | 330     | 689.5   | 968.5   |
|                    | low         | 7.5     | 13      | 22      |
|                    | high        | 78      | 189.5   | 228     |
|                    | low         | 6.5     | 12.5    | 19      |
|                    | medium-high | 43.5    | 93      | 127     |
| TRANSMEMB PROT     | very high   | 1000    | 1974.5  | 2917.5  |
| SOLUTE CARRIER     | high        | 163     | 551     | 475.5   |
|                    | medium-high | 47      | 103.5   | 137     |
| TF                 | high        | 345.5   | 711     | 1007    |
|                    | medium      | 11.5    | 25.5    | 33.5    |
|                    | very high   | 1749.02 | 3520.01 | 5093.85 |
| SOLUTE CARRIER     | high        | 125.863 | 360.267 | 366.253 |
|                    | low         | 5.5     | 6       | 16      |
|                    | high        | 52.5    | 105     | 152.5   |
| MYC                | medium-high | 46      | 71      | 133.5   |
|                    | medium      | 15      | 30      | 43.5    |
|                    | low         | 9.5     | 10.5    | 27.5    |
|                    | very high   | 601.008 | 1718.51 | 1738.99 |
|                    | very low    | 4.5     | 12.5    | 13      |
|                    | high        | 185     | 333     | 533.5   |

|                  |             |         |         |         |
|------------------|-------------|---------|---------|---------|
| TF               | high        | 50.5    | 93.5    | 145.5   |
|                  | high        | 262.112 | 429.44  | 754.639 |
|                  | medium      | 24.5988 | 48.8651 | 70.7575 |
|                  | very low    | 4       | 6       | 11.5    |
|                  | very high   | 712     | 1172.01 | 2044.46 |
| CHANNEL          | very high   | 869     | 2027    | 2489    |
|                  | medium-high | 32      | 85.5    | 91.5    |
|                  | medium      | 10.5    | 19.5    | 30      |
|                  | very low    | 3.5     | 9       | 10      |
|                  | very high   | 3432    | 8932.5  | 9805.5  |
|                  | high        | 230     | 406.5   | 656.5   |
|                  | high        | 447     | 962     | 1274    |
|                  | medium-high | 48.5    | 84.5    | 138     |
|                  | high        | 292.5   | 552.5   | 831.5   |
|                  | high        | 184.5   | 238.5   | 524     |
|                  | very high   | 515     | 641     | 1460    |
|                  | low         | 9       | 12      | 25.5    |
|                  | medium      | 23.5    | 61.5    | 66.5    |
|                  | high        | 77.5    | 108     | 218.5   |
|                  | high        | 260.5   | 694     | 734     |
| high             | 484.5       | 1025.5  | 1363    |         |
| medium           | 20.0207     | 33.444  | 56.1483 |         |
| low              | 5           | 13      | 14      |         |
| low              | 7.5         | 18      | 21      |         |
| very low         | 2.5         | 6.5     | 7       |         |
| SOLUTE CARRIER   | high        | 197     | 457     | 551     |
| CHANNEL          | high        | 61      | 124     | 170.5   |
|                  | high        | 322     | 837.502 | 899.001 |
|                  | very high   | 1294    | 3066.59 | 3612.35 |
|                  | very high   | 5185    | 13665.5 | 14452.5 |
| TF               | high        | 100     | 226.501 | 278.499 |
| MYOSIN           | medium-high | 37      | 52.5    | 103     |
|                  | medium      | 27      | 57      | 75      |
| METALLOPEPTIDASE | high        | 304.5   | 775.5   | 843.5   |
|                  | high        | 165     | 407.5   | 457     |
|                  | high        | 84.5    | 195     | 234     |
|                  | very high   | 1457    | 3812.98 | 4032.42 |
|                  | very high   | 745     | 1884.5  | 2061    |
| RECEPTOR         | high        | 104     | 267.5   | 287.501 |
|                  | high        | 157.5   | 466     | 434.5   |
|                  | medium      | 14.5    | 21.5    | 40      |
|                  | very high   | 694     | 1723    | 1911    |
| MYOSIN           | high        | 371     | 849     | 1021.5  |
|                  | high        | 129.538 | 257.174 | 356.58  |
| TRANSMEMB PROT   | very low    | 2       | 3       | 5.5     |
|                  | very low    | 4       | 7       | 11      |
|                  | low         | 6       | 7.5     | 16.5    |
|                  | high        | 105.5   | 140     | 290     |

|                |             |         |         |         |
|----------------|-------------|---------|---------|---------|
|                | high        | 185     | 190.5   | 508.5   |
|                | medium      | 23.5    | 40      | 64.5    |
|                | high        | 198     | 483.5   | 543     |
|                | high        | 369.815 | 842.551 | 1013.98 |
|                | high        | 67      | 104     | 183.5   |
|                | high        | 226.5   | 614.5   | 620     |
|                | very high   | 1419    | 2476    | 3882.5  |
|                | low         | 7.5     | 8.5     | 20.5    |
|                | medium-high | 48.5    | 96.5    | 132.5   |
|                | low         | 5.5     | 11.5    | 15      |
|                | medium      | 16.5    | 25.5    | 45      |
|                | medium      | 15.3821 | 30.5483 | 41.9118 |
|                | medium      | 14.5    | 38      | 39.5    |
|                | medium      | 21.5    | 29.5    | 58.5    |
| RA             | very low    | 3.5     | 7       | 9.5     |
| CHANNEL        | medium      | 10.5    | 29.5    | 28.5    |
|                | very low    | 3.5     | 8       | 9.5     |
|                | high        | 122.5   | 155.5   | 332     |
| TF             | medium      | 15.5    | 26      | 42      |
|                | high        | 224.5   | 352.5   | 607.5   |
| TF             | high        | 305.631 | 718.124 | 825.456 |
| COLLAGEN       | low         | 5       | 6       | 13.5    |
|                | medium      | 15      | 39      | 40.5    |
| SOLUTE CARRIER | low         | 5       | 10      | 13.5    |
| KINASE         | high        | 92.5    | 293.5   | 249.5   |
|                | high        | 154.5   | 339     | 416.5   |
|                | medium      | 29.5    | 62      | 79.5    |
|                | high        | 470.5   | 1042.01 | 1264.51 |
|                | very high   | 688.5   | 1722    | 1850    |
|                | very high   | 1188    | 2220    | 3191.5  |
|                | high        | 163     | 382     | 437.5   |
|                | high        | 208     | 483.5   | 558     |
|                | very high   | 949.487 | 1902    | 2545.99 |
|                | medium-high | 36.5    | 97      | 97.5    |
|                | medium-high | 48.5    | 69      | 129.5   |
|                | very low    | 3       | 7.5     | 8       |
| TRANSMEMB PROT | medium      | 16.5    | 35.5    | 44      |
|                | high        | 328     | 713     | 874     |
|                | high        | 92      | 140     | 244.5   |
| MYOSIN         | medium-high | 39      | 64      | 103.5   |
|                | very high   | 3255.43 | 5218.97 | 8625.5  |
|                | high        | 74      | 81      | 195.5   |
|                | high        | 446.5   | 930     | 1178    |
|                | very high   | 1661.5  | 2773.5  | 4382    |
|                | high        | 222.462 | 348.326 | 586.42  |
|                | high        | 113.5   | 275.5   | 299     |
|                | medium-high | 45      | 110.5   | 118.5   |
| TF/EMT         | very high   | 774.453 | 1518.13 | 2039.35 |

|                  |                  |           |         |         |       |
|------------------|------------------|-----------|---------|---------|-------|
| CHANNEL          | high             | 240       | 300     | 631     |       |
|                  | medium-high      | 48.5      | 109.5   | 127.5   |       |
|                  | high             | 92.5      | 208     | 243     |       |
|                  | medium           | 12        | 18.5    | 31.5    |       |
|                  | medium           | 16        | 26.5    | 42      |       |
|                  | very high        | 554.001   | 1362.02 | 1453.47 |       |
|                  | very high        | 3271.11   | 6061.94 | 8579.05 |       |
|                  | high             | 142.5     | 352     | 373     |       |
|                  | very high        | 1159.5    | 2305.5  | 3029.98 |       |
|                  | very high        | 878.495   | 2047.52 | 2294    |       |
|                  | high             | 156.5     | 233.5   | 408.499 |       |
|                  | high             | 91        | 149     | 237.5   |       |
|                  | high             | 256       | 476.5   | 667     |       |
|                  | high             | 84.5      | 107.5   | 220     |       |
| NOTCH            | high             | 70.5      | 139.5   | 183.5   |       |
|                  | very high        | 627       | 1538.5  | 1630.5  |       |
|                  | medium           | 16        | 17      | 41.5    |       |
|                  | very low         | 2.52762   | 5.5     | 6.554   |       |
|                  | medium           | 13.5      | 28      | 35      |       |
|                  | medium           | 13.5      | 27      | 35      |       |
|                  | METALLOPEPTIDASE | very high | 1432    | 2261    | 3706  |
|                  |                  | very high | 2035.5  | 3986    | 5266  |
|                  |                  | low       | 6       | 15      | 15.5  |
|                  |                  | very high | 5519    | 11629.5 | 14235 |
| high             |                  | 118.5     | 186.5   | 305     |       |
| RECEPTOR         | very low         | 3.5       | 8       | 9       |       |
|                  | high             | 178       | 455     | 457.5   |       |
|                  | high             | 69.5      | 133.5   | 178.5   |       |
| TF               | very high        | 951       | 1655    | 2438.5  |       |
|                  | high             | 326.5     | 716     | 836     |       |
|                  | medium           | 26        | 39      | 66.5    |       |
|                  | high             | 472       | 844     | 1207    |       |
| TF               | high             | 353       | 643.499 | 902.499 |       |
|                  | high             | 168.5     | 385     | 430.5   |       |
|                  | high             | 140       | 264.5   | 357.5   |       |
|                  | medium           | 10        | 17.5    | 25.5    |       |
|                  | medium           | 10        | 19.5    | 25.5    |       |
|                  | very high        | 616       | 1184.5  | 1570.5  |       |
|                  | medium-high      | 36.5      | 94.5    | 93      |       |
|                  | high             | 151.5     | 347     | 385.5   |       |
|                  | high             | 398.5     | 732.5   | 1014    |       |
|                  | very high        | 1978      | 4645    | 5033    |       |
| METALLOPEPTIDASE | high             | 140.5     | 333.5   | 357.5   |       |
|                  | high             | 358.5     | 723     | 912     |       |
|                  | very high        | 656.496   | 985.005 | 1668.5  |       |
| TF               | high             | 76        | 96.5    | 193     |       |
|                  | medium           | 10.1431   | 20.3364 | 25.7412 |       |
| CHANNEL          | medium-high      | 33.5      | 54      | 85      |       |

|                    |             |         |         |         |
|--------------------|-------------|---------|---------|---------|
|                    | high        | 82      | 187     | 208     |
|                    | low         | 7.5     | 14      | 19      |
|                    | medium      | 15      | 41.5    | 38      |
|                    | very high   | 1326    | 2753    | 3357.5  |
|                    | medium      | 17      | 37      | 43      |
| TF                 | medium      | 29      | 42.8617 | 73.3489 |
|                    | high        | 245     | 540.5   | 619.5   |
|                    | very high   | 1314.99 | 3080.44 | 3324.05 |
|                    | high        | 79      | 135.5   | 199.5   |
|                    | very high   | 990.999 | 1207.49 | 2502.5  |
|                    | high        | 92.5    | 187     | 233.5   |
|                    | medium      | 10.5    | 26      | 26.5    |
| CHANNEL            | high        | 223.5   | 351     | 564     |
|                    | high        | 166.5   | 332.499 | 420     |
|                    | medium      | 12.5    | 24      | 31.5    |
| CHANNEL            | high        | 281.499 | 594.499 | 708.497 |
| TF                 | high        | 65.6825 | 162.995 | 165.298 |
|                    | high        | 317.001 | 538.497 | 796.995 |
|                    | medium      | 19.5    | 35.5    | 49      |
|                    | very high   | 645     | 1176.5  | 1618.5  |
|                    | high        | 289.5   | 554.997 | 725.5   |
|                    | high        | 82.5    | 122.5   | 206.5   |
|                    | medium      | 15      | 23.5    | 37.5    |
|                    | low         | 8       | 18      | 20      |
|                    | medium      | 21      | 63      | 52.5    |
|                    | very low    | 2       | 2.5     | 5       |
|                    | very low    | 2       | 4       | 5       |
|                    | very low    | 2       | 3       | 5       |
|                    | low         | 5       | 6       | 12.5    |
|                    | medium      | 10      | 22      | 25      |
|                    | medium-high | 32      | 52.5    | 80      |
|                    | very high   | 523     | 1163    | 1306    |
|                    | high        | 112     | 229     | 278.5   |
|                    | medium      | 10.3927 | 19.2753 | 25.8038 |
| CHEMOKINE          | low         | 9.2897  | 12.2805 | 23.0624 |
| TGFB/BMP           | very high   | 3374    | 4984    | 8372.5  |
|                    | medium      | 14.1389 | 22.8768 | 35.0711 |
|                    | high        | 324.5   | 580     | 804.501 |
|                    | very high   | 539.5   | 981.5   | 1337.5  |
|                    | medium      | 22      | 35.5    | 54.5    |
|                    | high        | 423.501 | 835     | 1049.01 |
|                    | very high   | 1843    | 2357.5  | 4562.5  |
| CHOLINERGIC RECEPT | high        | 78      | 225     | 193     |
|                    | high        | 338.5   | 771.498 | 837.506 |
|                    | very high   | 700     | 1564.5  | 1729.5  |
|                    | very high   | 1169    | 2419.52 | 2888    |
| KINASE             | very high   | 3970.51 | 8329.67 | 9805.7  |
|                    | high        | 73      | 154.5   | 180     |

|                |             |         |         |         |
|----------------|-------------|---------|---------|---------|
|                | high        | 89.5    | 156.5   | 220     |
|                | high        | 99.5001 | 213     | 244.5   |
|                | low         | 5.5     | 12.5    | 13.5    |
|                | low         | 5.5     | 10.5    | 13.5    |
|                | high        | 217.5   | 506     | 533     |
|                | high        | 66      | 108.5   | 161.5   |
| NOTCH CHANNEL  | very low    | 4.5     | 5       | 11      |
|                | low         | 9       | 15.5    | 22      |
|                | high        | 182.5   | 353.5   | 446     |
|                | very high   | 1332.49 | 3108.91 | 3255.11 |
|                | very high   | 2514.94 | 4914.77 | 6136.99 |
|                | high        | 50      | 98.5    | 122     |
|                | very high   | 959     | 1897    | 2336.5  |
|                | very high   | 696.504 | 1048.49 | 1696.52 |
|                | high        | 296     | 656.5   | 720.5   |
|                | medium      | 15      | 30.5    | 36.5    |
|                | medium      | 17.5    | 18      | 42.5    |
|                | very low    | 3.5     | 9.5     | 8.5     |
|                | low         | 7       | 15      | 17      |
| RECEPTOR       | very low    | 3.5     | 5       | 8.5     |
|                | very high   | 1252    | 2371    | 3040.5  |
| SOLUTE CARRIER | very high   | 696.5   | 1269    | 1690.5  |
|                | medium-high | 47      | 84.5    | 114     |
|                | high        | 228     | 662     | 552.5   |
| RECEPTOR       | high        | 78      | 90.5    | 189     |
|                | very high   | 1049    | 1922.48 | 2541.47 |
|                | high        | 273     | 410     | 661.001 |
| RECEPTOR       | high        | 100.899 | 176.793 | 244.297 |
|                | high        | 304     | 466.5   | 736     |
|                | high        | 199     | 403.5   | 481     |
|                | low         | 6       | 12.5    | 14.5    |
|                | very high   | 757.5   | 1523.5  | 1830    |
| WNT            | high        | 367     | 778.5   | 886.5   |
|                | medium      | 14.5    | 18.5    | 35      |
| TF             | medium-high | 36.5    | 59      | 88      |
|                | high        | 251.5   | 595.5   | 605     |
|                | very high   | 819.006 | 1810.01 | 1968.53 |
|                | high        | 87      | 127.5   | 209     |
|                | very high   | 971.5   | 1872    | 2333.5  |
| TF             | high        | 231.5   | 375.5   | 556.001 |
|                | high        | 365.999 | 827.003 | 878.999 |
|                | high        | 116     | 200     | 278.5   |
|                | very high   | 2732.51 | 5742.09 | 6558.22 |
|                | very low    | 2.5     | 5.5     | 6       |
|                | high        | 71.5    | 114     | 171.5   |
|                | very high   | 1707    | 3121    | 4088.5  |
|                | high        | 239.5   | 384     | 573.5   |
|                | very high   | 1682.5  | 2840    | 4027.5  |

|                        |             |         |         |         |      |
|------------------------|-------------|---------|---------|---------|------|
|                        | high        | 347     | 727.503 | 830.5   |      |
|                        | very high   | 515.497 | 681.5   | 1230.98 |      |
|                        | medium      | 15.5    | 21.5    | 37      |      |
|                        | medium      | 15.5    | 16.5    | 37      |      |
|                        | medium      | 28.5    | 49.5    | 68      |      |
| TF/EMT                 | high        | 60.9066 | 105.548 | 145.291 |      |
|                        | very high   | 623.5   | 1418.5  | 1487    |      |
|                        | medium-high | 40.5    | 78      | 96.5    |      |
|                        | very high   | 3510.4  | 7232.08 | 8363.4  |      |
|                        | medium      | 17      | 29      | 40.5    |      |
|                        | very high   | 3038.52 | 6252.59 | 7237.16 |      |
|                        | very high   | 3858.33 | 8749.96 | 9188.28 |      |
|                        | very high   | 1734.02 | 3903.61 | 4125.5  |      |
|                        | very high   | 556.5   | 953     | 1323.5  |      |
|                        | medium      | 28      | 75.5    | 66.5    |      |
| SOLUTE CARRIER CHANNEL | high        | 205.5   | 440     | 488     |      |
|                        | medium-high | 37.5    | 81      | 89      |      |
|                        | very high   | 11876.2 | 27585.6 | 28091.5 |      |
| KINASE                 | high        | 96.5    | 103     | 228     |      |
|                        | very high   | 1241    | 2149.53 | 2928    |      |
|                        | low         | 7       | 14.5    | 16.5    |      |
| SOLUTE CARRIER         | high        | 89      | 167.5   | 209.5   |      |
|                        | high        | 121.605 | 279.965 | 286.17  |      |
|                        | high        | 64      | 104     | 150.5   |      |
|                        | high        | 164     | 322     | 385.5   |      |
|                        | high        | 96.5    | 192     | 226.5   |      |
|                        | very high   | 2916    | 4591    | 6835.46 |      |
| EMT COLLAGEN           | medium-high | 46.5    | 79.5    | 109     |      |
|                        | high        | 254.5   | 408.999 | 595.003 |      |
|                        | high        | 74.5    | 115.5   | 174     |      |
|                        | low         | 6       | 10.5    | 14      |      |
|                        | very low    | 4.5     | 9.5     | 10.5    |      |
|                        | very low    | 4.5     | 9       | 10.5    |      |
|                        | high        | 359     | 532.5   | 837     |      |
|                        | high        | 112     | 138.5   | 261     |      |
|                        | very high   | 3156.5  | 6319.5  | 7348    |      |
|                        | high        | 67.5    | 149.5   | 157     |      |
| TF                     | high        | 392.727 | 901.185 | 913.439 |      |
|                        | high        | 492     | 944.5   | 1143.5  |      |
|                        | high        | 367.865 | 839.866 | 854.526 |      |
|                        | medium      | 28      | 44.5    | 65      |      |
|                        | high        | 90.5    | 176.5   | 210     |      |
|                        | high        | 114.5   | 142.5   | 265.5   |      |
|                        | very high   | 2077    | 3795    | 4814    |      |
|                        | high        | 118.5   | 238.5   | 274.5   |      |
|                        | RECEPTOR    | low     | 9.5     | 21.5    | 22   |
|                        |             | high    | 481     | 938.5   | 1113 |
| high                   |             | 368     | 482.503 | 851.005 |      |

|                |             |         |         |         |
|----------------|-------------|---------|---------|---------|
|                | very high   | 940     | 1757.5  | 2173    |
|                | low         | 5       | 8.24667 | 11.5544 |
| SOLUTE CARRIER | high        | 118.5   | 240     | 273.5   |
|                | low         | 6.5     | 13.5    | 15      |
|                | very high   | 1431    | 2467.5  | 3298.5  |
|                | very high   | 8425    | 19160   | 19413.5 |
|                | high        | 76      | 127.5   | 175     |
|                | high        | 141.5   | 199.5   | 325.499 |
| CHEMOKINE      | low         | 5       | 6.5     | 11.5    |
| TF             | high        | 314     | 697.5   | 721     |
|                | medium      | 17      | 20      | 39      |
|                | high        | 193     | 428.5   | 442.5   |
|                | high        | 106     | 162     | 243     |
|                | high        | 87.5    | 138.5   | 200.5   |
|                | very high   | 1008    | 2191    | 2309.56 |
|                | very high   | 712.5   | 1165    | 1632.5  |
|                | very high   | 786     | 1663.5  | 1799.5  |
|                | high        | 434.5   | 864.5   | 994.5   |
|                | very high   | 632.211 | 1058.02 | 1445.91 |
|                | medium-high | 31.5    | 33      | 72      |
|                | very low    | 3.5     | 5       | 8       |
|                | very high   | 1304    | 2049.5  | 2979.5  |
| TF             | high        | 365     | 464.5   | 833     |
|                | medium      | 21.5    | 48.5    | 49      |
| CADHERIN/WNT   | high        | 474.5   | 818     | 1080.51 |
| KINASE         | very high   | 1107.5  | 2081.01 | 2521.02 |
|                | very high   | 2622.5  | 5510.5  | 5965.5  |
|                | high        | 315     | 660     | 716.327 |
|                | very high   | 588.5   | 1301    | 1338    |
|                | medium      | 27.5    | 47.5    | 62.5    |
|                | high        | 332     | 676     | 754.5   |
| KINASE         | medium      | 20.5    | 37      | 46.5    |
| WNT            | high        | 61.2788 | 80.3103 | 138.897 |
| CHANNEL        | low         | 9.5     | 17.5    | 21.5    |
|                | high        | 50      | 90.5    | 113     |
|                | very high   | 598     | 1322.5  | 1351    |
| SOLUTE CARRIER | high        | 196.5   | 326     | 443.5   |
|                | high        | 59      | 107     | 133     |
|                | very high   | 760     | 1469    | 1712    |
| TF/RA          | very high   | 670     | 1023.5  | 1508.49 |
|                | very high   | 588     | 1047.5  | 1323.5  |
| WNT            | high        | 423.5   | 720.5   | 953     |
|                | low         | 6       | 10      | 13.5    |
|                | high        | 120     | 218.5   | 270     |
|                | low         | 6       | 13      | 13.5    |
| TF             | very low    | 4       | 4.5     | 9       |
|                | very high   | 601.5   | 1147    | 1351.5  |
|                | high        | 57.5    | 73.5    | 129     |



|                |             |         |         |         |
|----------------|-------------|---------|---------|---------|
|                | medium-high | 43.5    | 97      | 97.5    |
| KINASE         | high        | 83      | 149.5   | 186     |
|                | high        | 91.5    | 97      | 205     |
| FGF            | medium-high | 33.5    | 72      | 75      |
| TF             | high        | 117.5   | 203.767 | 263     |
| KINASE         | high        | 356     | 724.5   | 796.5   |
|                | low         | 8.5     | 9       | 19      |
|                | high        | 71      | 73      | 158.5   |
|                | very high   | 987.5   | 1544.5  | 2204    |
|                | very high   | 3616.5  | 7579    | 8068    |
|                | medium      | 26      | 54.5    | 58      |
|                | high        | 175     | 346     | 390     |
|                | medium      | 11      | 14.5    | 24.5    |
|                | medium      | 26.5    | 47.5    | 59      |
| TF             | high        | 109     | 178     | 242.5   |
|                | high        | 58      | 93      | 129     |
| SOLUTE CARRIER | low         | 9       | 11      | 20      |
| WNT            | medium      | 20.5    | 33      | 45.5    |
|                | very high   | 2188.49 | 2832.44 | 4855.73 |
|                | very high   | 1038    | 2109.5  | 2299.5  |
|                | very high   | 1411.5  | 2551.5  | 3126.5  |
| TF             | medium-high | 47      | 80      | 104     |
|                | very high   | 1411.5  | 2583    | 3121.5  |
| SOLUTE CARRIER | high        | 165     | 315.001 | 364.5   |
|                | medium-high | 45.5    | 94      | 100.5   |
| CYTOKINE       | medium-high | 39      | 51.5    | 86      |
|                | very high   | 970.5   | 2044.5  | 2139.5  |
|                | high        | 232.5   | 490     | 512.5   |
| TF             | high        | 184.5   | 380.5   | 406.5   |
|                | very high   | 881     | 1154.5  | 1940    |
|                | very high   | 1699.5  | 3451.5  | 3742    |
| TF             | very low    | 2.5     | 4       | 5.5     |
|                | low         | 5       | 10      | 11      |
|                | high        | 240     | 359.5   | 527.5   |
|                | very high   | 1002    | 1770    | 2200.5  |
| TF             | very high   | 1852    | 2720    | 4067    |
|                | high        | 413.5   | 892     | 907.496 |
|                | very high   | 966.5   | 1737    | 2121    |
|                | very high   | 888.999 | 1815.51 | 1948.52 |
|                | very high   | 3053.51 | 6314.07 | 6690.28 |
| FGF            | medium      | 21      | 28      | 46      |
|                | very high   | 845.782 | 1521.98 | 1851.61 |
| TF             | high        | 112     | 167     | 245     |
|                | very high   | 534.5   | 934.5   | 1169    |
| SOLUTE CARRIER | high        | 61.5    | 99.0001 | 134.5   |
|                | very high   | 1384.99 | 2218.04 | 3028.4  |
| CYTOKINE       | very high   | 722.999 | 860.499 | 1580    |
|                | very high   | 3302.64 | 6461.03 | 7216.76 |

|                    |             |         |         |         |
|--------------------|-------------|---------|---------|---------|
|                    | high        | 306     | 568.5   | 668.5   |
|                    | very high   | 728     | 1267.5  | 1590    |
|                    | very high   | 1279.5  | 2489.5  | 2790    |
|                    | medium      | 19.5    | 30.5    | 42.5    |
|                    | medium      | 17      | 20.5    | 37      |
|                    | low         | 8.5     | 15      | 18.5    |
| TRANSMEMB PROT     | medium-high | 34.6566 | 52.1094 | 75.3201 |
| SOLUTE CARRIER     | very high   | 807.997 | 1219.48 | 1755.5  |
|                    | very high   | 1306.5  | 2480.5  | 2835    |
|                    | high        | 300     | 632.5   | 650.5   |
|                    | very high   | 1618    | 2772    | 3507    |
|                    | very low    | 3       | 3.5     | 6.5     |
|                    | very low    | 3       | 5       | 6.5     |
| TF                 | low         | 6       | 12.5    | 13      |
|                    | medium-high | 43      | 64.298  | 93.1583 |
|                    | high        | 208     | 417.5   | 450.5   |
|                    | high        | 184     | 378     | 398.5   |
|                    | high        | 69.5    | 141.5   | 150.5   |
|                    | very high   | 538.5   | 970     | 1166    |
|                    | high        | 157.5   | 317     | 341     |
|                    | high        | 242.5   | 507.5   | 525     |
| GOLGI/ER TRANSPORT | high        | 474.5   | 974.5   | 1026.5  |
|                    | medium-high | 46      | 66      | 99.5    |
|                    | high        | 364.5   | 756.5   | 788     |
| MYOSIN             | high        | 83.5    | 145     | 180.5   |
| WNT                | very high   | 1815.89 | 3238.23 | 3923.52 |
|                    | very high   | 625.495 | 1238.51 | 1351.01 |
|                    | very high   | 1631    | 3134.5  | 3522    |
|                    | very high   | 1333.5  | 2122.5  | 2878    |
| NEPHRIN-LIKE       | very high   | 622.815 | 955.766 | 1342.94 |
| TF                 | high        | 67.5    | 139.5   | 145.5   |
|                    | very high   | 745.5   | 1460    | 1605.5  |
|                    | high        | 410.5   | 726     | 883.5   |
| NOTCH              | high        | 200     | 229.5   | 430.153 |
|                    | very high   | 949     | 1906    | 2041    |
| MYOSIN             | medium      | 10      | 17.5    | 21.5    |
|                    | medium      | 13.6533 | 28.1951 | 29.3478 |
|                    | medium-high | 37      | 71.5    | 79.5    |
|                    | medium-high | 40.5    | 86.0001 | 86.9999 |
| TF                 | high        | 138.5   | 256     | 297.5   |
|                    | high        | 208     | 335.104 | 446.668 |
|                    | medium-high | 47.5    | 59.5    | 102     |
|                    | high        | 66      | 94.5    | 141.5   |
|                    | very high   | 1340    | 2536.51 | 2872.5  |
|                    | medium      | 24.5    | 48      | 52.5    |
|                    | very low    | 3.5     | 6       | 7.5     |
|                    | very high   | 636.496 | 1052.48 | 1363.01 |
| METALLOPEPTIDASE   | very high   | 1629.87 | 3348.31 | 3486.67 |

|                |             |         |         |         |
|----------------|-------------|---------|---------|---------|
|                | low         | 7.5     | 10      | 16      |
|                | very high   | 1102    | 1899    | 2347.5  |
|                | very high   | 9513.46 | 13653   | 20263.8 |
|                | very high   | 776.503 | 1348.51 | 1653.5  |
|                | very high   | 562.96  | 1045.34 | 1198.41 |
| KINASE         | medium-high | 47      | 78.5    | 100     |
|                | very high   | 2446    | 4771    | 5200.5  |
|                | medium      | 12      | 18.5    | 25.5    |
|                | medium      | 20      | 39      | 42.5    |
|                | very low    | 4       | 6       | 8.5     |
|                | very low    | 4       | 4.5     | 8.5     |
|                | very low    | 4       | 4.5     | 8.5     |
|                | high        | 194     | 254     | 412     |
| TF             | very high   | 5366    | 9126    | 11393   |
| SOLUTE CARRIER | medium      | 24.5    | 44      | 52      |
|                | very high   | 2432.5  | 4734    | 5161    |
| TF             | medium      | 16.5    | 31.5    | 35      |
|                | medium-high | 42.5    | 60      | 90      |
| CHANNEL        | low         | 8.5     | 13.5    | 18      |
| TF             | high        | 450.998 | 566.004 | 955.005 |
| TF             | very high   | 859     | 1757.5  | 1818.5  |
| CHANNEL        | medium      | 13      | 23      | 27.5    |
|                | high        | 406     | 759     | 858.5   |
|                | medium      | 17.5    | 17      | 37      |
|                | high        | 281     | 548.5   | 594     |
|                | medium-high | 45.5    | 71      | 96      |
|                | high        | 129     | 182.5   | 272     |
|                | high        | 235.5   | 439     | 496.5   |
|                | very high   | 599.832 | 1016.96 | 1264.39 |
|                | very high   | 2286.05 | 4803.67 | 4816.31 |
| SOLUTE CARRIER | high        | 361     | 689.5   | 760.5   |
|                | medium-high | 33      | 63.5    | 69.5    |
|                | very high   | 1106    | 1366    | 2329    |
|                | high        | 315.5   | 448.5   | 664     |
|                | very high   | 948     | 1576    | 1991    |
|                | medium      | 15.5    | 29      | 32.5    |
|                | high        | 130     | 209     | 272.5   |
|                | high        | 418     | 728     | 876     |
|                | very high   | 1137.5  | 2118    | 2383    |
|                | high        | 59      | 109     | 123.5   |
|                | high        | 237.5   | 335     | 497     |
| TRANSMEMB PROT | high        | 76      | 118     | 159     |
|                | medium      | 11      | 21      | 23      |
|                | high        | 83      | 148     | 173.5   |
|                | very high   | 2466.97 | 4888.87 | 5155.47 |
|                | high        | 78.5    | 121.5   | 164     |
|                | very high   | 521.5   | 1056.5  | 1089.5  |
| CADHERIN       | very high   | 1054.5  | 1712    | 2202    |

|                |           |         |         |         |
|----------------|-----------|---------|---------|---------|
| COLLAGEN       | very high | 5978.5  | 10927   | 12481   |
|                | very high | 6143.03 | 11510.9 | 12804.9 |
|                | very high | 1291.5  | 2505.5  | 2690    |
|                | high      | 271.592 | 558.925 | 565.507 |
|                | high      | 97.5    | 143.5   | 203     |
|                | high      | 76      | 143.5   | 158     |
|                | very high | 1814.5  | 3617    | 3770.99 |
|                | medium    | 19.5    | 24      | 40.5    |
| TF             | very high | 505.319 | 1046.57 | 1048.75 |
|                | very high | 2317.96 | 4702.5  | 4809.33 |
|                | high      | 351.402 | 617.876 | 728.963 |
|                | high      | 195     | 304.5   | 404.5   |
| FGF?           | very high | 928.5   | 1629    | 1925.5  |
|                | high      | 328.5   | 671     | 681     |
|                | medium    | 21      | 25.5    | 43.5    |
|                | high      | 85      | 121.5   | 176     |
| TRANSMEMB PROT | very high | 707.226 | 1155.32 | 1463.98 |
|                | high      | 417     | 463.5   | 863     |
|                | very high | 4715.44 | 7697.86 | 9751.48 |
|                | low       | 7.5     | 13.5    | 15.5    |
|                | high      | 143     | 280     | 295.5   |
| WNT            | very high | 4300    | 6248    | 8884    |
|                | very high | 662     | 1251    | 1367.5  |
|                | very high | 5777.77 | 10520.5 | 11929.3 |
|                | TF        | 62.0001 | 111     | 128     |
| CHEMOKINE      | high      | 171.5   | 272.5   | 354     |
|                | high      | 117.5   | 228.5   | 242.5   |
|                | high      | 167.5   | 344.5   | 345.5   |
|                | very high | 855     | 1715.5  | 1762.5  |
|                | very high | 1031    | 1648    | 2124.5  |
|                | high      | 167.5   | 160.5   | 345     |
|                | high      | 151.5   | 249.5   | 312     |
|                | high      | 128.5   | 196.5   | 264.5   |
| TF             | very high | 767.5   | 1468    | 1579    |
|                | very high | 11203   | 20247   | 23042.5 |
|                | high      | 390.5   | 678.5   | 802.5   |
| TF             | very high | 1123.5  | 1540.5  | 2306.98 |
|                | high      | 58      | 79      | 119     |
|                | high      | 150     | 165.5   | 307.5   |
| SOLUTE CARRIER | medium    | 10      | 15.5    | 20.5    |
|                | very high | 1243.5  | 2036    | 2548    |
|                | very high | 2061    | 3857.5  | 4223    |
| HH             | very high | 4430    | 8547.5  | 9071    |
|                | very high | 525     | 786.5   | 1074.5  |
|                | high      | 423     | 557     | 865.5   |
| TF             | very high | 789.5   | 1435.5  | 1615    |
|                | very high | 691.5   | 1102.5  | 1414.5  |
|                | high      | 412     | 800     | 842.5   |

|                |             |         |         |         |
|----------------|-------------|---------|---------|---------|
| CHEMOKINE      | medium      | 20.491  | 33.4106 | 41.8853 |
|                | very high   | 1020.5  | 2383    | 2085    |
| CHANNEL        | high        | 58      | 78.9999 | 118.5   |
|                | high        | 235.5   | 367.5   | 480.5   |
|                | very high   | 935     | 1665    | 1907.5  |
|                | high        | 189.5   | 288.5   | 386.5   |
|                | high        | 422     | 648.5   | 860.5   |
|                | very high   | 653.5   | 1344.5  | 1332.5  |
|                | medium      | 26      | 41      | 53      |
| SOLUTE CARRIER | medium      | 12.648  | 25.7477 | 25.7691 |
|                | high        | 54      | 105     | 110     |
|                | high        | 163     | 294.5   | 332     |
|                | very high   | 521.5   | 1026    | 1062    |
|                | high        | 318     | 437     | 646.504 |
|                | high        | 415     | 754     | 843.5   |
|                | very high   | 1481.5  | 2700.5  | 3007.51 |
| TF             | very high   | 4498    | 7974.04 | 9119.5  |
|                | high        | 184     | 217.5   | 373     |
|                | high        | 213.5   | 385     | 432.5   |
| CHANNEL        | high        | 98.5    | 165     | 199.5   |
|                | medium-high | 38.6742 | 64.7491 | 78.322  |
| NOTCH/EMT      | very high   | 1329.5  | 1958.51 | 2692.01 |
|                | very high   | 1809.5  | 3470.5  | 3661.5  |
|                | very high   | 791     | 1567.5  | 1598    |
| WNT            | very high   | 830     | 1327    | 1676.5  |
| CHANNEL        | high        | 383.5   | 611.501 | 774.497 |
|                | very high   | 1316.73 | 2390.85 | 2656.62 |
|                | high        | 403.998 | 636.501 | 814.498 |
|                | high        | 283.5   | 560.5   | 571.5   |
|                | high        | 260.5   | 511.501 | 524.5   |
|                | medium-high | 43.5    | 68      | 87.5    |
| MYOSIN         | high        | 52      | 99.5    | 104.5   |
|                | high        | 62      | 116.5   | 124.5   |
|                | high        | 68.5    | 109     | 137.5   |
| TRANSMEMB PROT | high        | 100     | 184     | 200.5   |
|                | very high   | 1262    | 2311    | 2529    |
|                | high        | 107     | 157     | 214.001 |
|                | high        | 124.5   | 206     | 249     |
|                | medium      | 14.5    | 28      | 29      |
|                | medium-high | 37.5    | 62.5    | 75      |
| TF             | low         | 5       | 6       | 10      |
| CYTOKINE       | very low    | 2.5     | 4       | 5       |
|                | medium-high | 41.5    | 68      | 83      |
|                | medium      | 26.5    | 42.5    | 53      |
|                | high        | 81      | 65.5    | 40.5    |
| KINASE         | low         | 7       | 5       | 3.5     |
| CHANNEL        | high        | 158     | 113     | 79      |
|                | very high   | 1524.5  | 1294    | 754.5   |

|                |             |         |         |         |
|----------------|-------------|---------|---------|---------|
|                | very high   | 662     | 549     | 326     |
| WNT            | very high   | 3847.32 | 3716.38 | 1889.63 |
| RECEPTOR       | very high   | 508     | 331.5   | 245.5   |
|                | high        | 81      | 51.5    | 39      |
| TF             | very high   | 775.495 | 591.501 | 370.5   |
|                | high        | 99.5    | 76.5    | 47.5    |
|                | very high   | 516     | 387     | 243     |
|                | very high   | 541.5   | 412.5   | 252     |
|                | medium      | 14      | 10.5    | 6.5     |
| WNT            | very high   | 1976.5  | 1651.99 | 912.996 |
|                | medium      | 13      | 11.5    | 6       |
|                | high        | 267.999 | 154     | 123.5   |
| TF             | very high   | 714.962 | 531.725 | 329.201 |
| CHANNEL        | very high   | 3300    | 2039    | 1508    |
| KINASE         | high        | 272.5   | 188     | 124     |
|                | high        | 133.5   | 145.5   | 60.5    |
|                | medium      | 29      | 17.5    | 13      |
|                | medium-high | 48      | 44.5    | 21.5    |
|                | high        | 400     | 425     | 177.5   |
|                | very high   | 911.507 | 404.498 | 401.499 |
|                | medium      | 12.5    | 11      | 5.5     |
|                | very high   | 1308.5  | 575     | 572     |
| SOLUTE CARRIER | high        | 122     | 98      | 52.5    |
| SOLUTE CARRIER | high        | 168.5   | 161     | 72.5    |
|                | medium      | 16.5    | 9.5     | 7       |
|                | very high   | 2673    | 2240.5  | 1126    |
|                | medium      | 28.5    | 15.5    | 12      |
|                | very high   | 795.5   | 774     | 331     |
|                | high        | 215.609 | 106.552 | 89.1085 |
| MYOSIN         | very high   | 6179.43 | 4032.94 | 2535.5  |
| CHANNEL        | very high   | 1722.5  | 908.501 | 704.999 |
|                | high        | 134.03  | 73.9807 | 54.3196 |
| TGFB/BMP       | medium-high | 31      | 21.5    | 12.5    |
| TF             | very high   | 1743    | 1356    | 702.498 |
|                | high        | 71      | 35.5    | 28.5    |
| TGFB/BMP       | very high   | 4160    | 3275.5  | 1667    |
| TF             | low         | 5       | 4.5     | 2       |
|                | low         | 5       | 3       | 2       |
|                | high        | 124     | 110     | 49.5    |
|                | very high   | 1137    | 736     | 451.5   |
|                | medium      | 29      | 15      | 11.5    |
| WNT            | very high   | 1500    | 1255    | 593     |
| SOLUTE CARRIER | high        | 101.5   | 41.5    | 40      |
|                | very high   | 5804.5  | 4201    | 2263.5  |
| CYTOKINE       | high        | 363     | 227.5   | 141.5   |
|                | medium      | 13      | 10      | 5       |
| TF             | high        | 129     | 74.9999 | 49.5    |
|                | medium-high | 34      | 18.5    | 13      |

|                  |             |         |         |         |
|------------------|-------------|---------|---------|---------|
|                  | very high   | 551.501 | 415.999 | 210.5   |
| SOLUTE CARRIER   | high        | 129     | 84.5    | 49      |
|                  | high        | 79      | 44      | 30      |
| TF               | very high   | 1171.5  | 882     | 443     |
|                  | medium      | 12      | 11.5    | 4.5     |
|                  | high        | 479     | 284.5   | 179.5   |
|                  | high        | 434.5   | 274.5   | 162.5   |
| EMT              | high        | 187.5   | 120.5   | 69.5    |
|                  | high        | 65      | 38.5    | 24      |
|                  | medium      | 19      | 17      | 7       |
|                  | very high   | 3157    | 2559    | 1163    |
|                  | high        | 405.498 | 187     | 148.5   |
| TRANSMEMB PROT   | high        | 404     | 326     | 147.5   |
|                  | low         | 5.5     | 4.5     | 2       |
| IGF              | very high   | 1850.99 | 1583    | 669.499 |
|                  | medium      | 12.5    | 11.5    | 4.5     |
| TF               | high        | 238.5   | 235.5   | 84.5    |
| SOLUTE CARRIER   | high        | 280     | 173     | 99      |
| TF               | high        | 73.0544 | 44.1007 | 25.5    |
| TF               | medium-high | 43      | 22      | 15      |
|                  | high        | 116.5   | 67      | 40.5    |
|                  | medium-high | 33.5    | 19      | 11.5    |
| WNT/EMT          | very high   | 3274.5  | 1466.5  | 1108    |
|                  | medium-high | 44.5    | 31      | 15      |
| CHANNEL          | high        | 99.5    | 96      | 33.5    |
|                  | low         | 6       | 4       | 2       |
|                  | low         | 7.5     | 4       | 2.5     |
|                  | very high   | 5046    | 2564.5  | 1679.5  |
|                  | medium      | 24.5    | 16.5    | 8       |
|                  | medium      | 17      | 10      | 5.5     |
|                  | high        | 106.109 | 64.8328 | 34.2245 |
|                  | high        | 243     | 148     | 78.0001 |
| NOTCH            | very high   | 571.5   | 259.5   | 181     |
| FGF              | high        | 185     | 147.5   | 56.5    |
| TF               | high        | 65      | 30.5    | 19.5    |
| WNT              | medium-high | 38.5    | 15      | 11.5    |
|                  | high        | 399.5   | 185.5   | 118     |
|                  | medium      | 12      | 8       | 3.5     |
|                  | high        | 229.5   | 78.5    | 66      |
| SOLUTE CARRIER   | high        | 87      | 35      | 25      |
|                  | high        | 136     | 55.5    | 38.5    |
|                  | very high   | 8425.98 | 3677.94 | 2360    |
| METALLOPEPTIDASE | very high   | 12126.8 | 5989.34 | 3395.01 |
|                  | low         | 9.00216 | 4.38801 | 2.50771 |
|                  | very high   | 1109    | 988.5   | 306.5   |
| SOLUTE CARRIER   | high        | 147.5   | 90.5    | 40.5    |
| SOLUTE CARRIER   | high        | 213.5   | 138.5   | 57.5    |
| CHANNEL          | very high   | 1117.5  | 890     | 295     |

|                  |             |         |         |         |
|------------------|-------------|---------|---------|---------|
|                  | high        | 391     | 148     | 102.5   |
|                  | very high   | 523     | 175.5   | 136.5   |
| TF               | very high   | 1378.5  | 819.5   | 355.5   |
|                  | medium      | 10      | 6.5     | 2.5     |
| TF               | medium      | 10      | 8.5     | 2.5     |
|                  | high        | 122     | 50.5    | 29.5    |
|                  | medium      | 10.5    | 9       | 2.5     |
| TF               | high        | 101     | 60.5    | 23.5    |
|                  | very high   | 576.997 | 217.5   | 132.5   |
| SOLUTE CARRIER   | high        | 149.5   | 91.5    | 34      |
| CADHERIN/WNT     | very high   | 1299.01 | 611.999 | 293.5   |
| IGF              | medium      | 29      | 20.5    | 6.5     |
|                  | high        | 96      | 77.5    | 21.5    |
|                  | medium-high | 47      | 27      | 10.5    |
|                  | medium      | 27      | 16      | 6       |
|                  | medium      | 20.5    | 6       | 4.5     |
| SOLUTE CARRIER   | high        | 72      | 33      | 15.5    |
|                  | medium      | 12      | 6.5     | 2.5     |
| TF               | medium      | 12      | 8       | 2.5     |
| HH               | high        | 134     | 30      | 27      |
|                  | low         | 7.5     | 4       | 1.5     |
| METALLOPEPTIDASE | high        | 200     | 107.5   | 39      |
|                  | medium      | 18      | 9       | 3.5     |
|                  | medium-high | 47.5    | 42      | 9       |
| FGF              | very high   | 5832.88 | 5154.98 | 1104    |
| CHANNEL          | high        | 185     | 97.5    | 35      |
|                  | high        | 75.3588 | 20.1007 | 14.1241 |
| WNT              | high        | 120     | 79.5    | 21.5    |
|                  | low         | 6       | 1.5     | 1       |
| TGFB/BMP/EMT     | high        | 265     | 120.5   | 44      |
|                  | high        | 50.5    | 37      | 8       |
| RECEPTOR         | medium      | 19.5    | 10      | 3       |
| TF               | medium-high | 41.5    | 36      | 6       |
| TF               | medium-high | 38.5    | 29      | 5.5     |
|                  | very high   | 619     | 286     | 79.5    |
| EMT              | high        | 382.501 | 85.5    | 44      |
| IGF              | very high   | 904.5   | 244     | 90.9999 |
|                  | medium-high | 31.5    | 12      | 3       |
|                  | high        | 64      | 24.5    | 6       |
|                  | low         | 5.5     | 3       | 0.5     |
|                  | very high   | 924     | 597     | 78.5    |
| RA               | very high   | 1880.53 | 562.941 | 159.037 |
|                  | low         | 6       | 1.5     | 0.5     |
| CHANNEL          | very high   | 678.661 | 123     | 56.5    |
|                  | high        | 69.5    | 46      | 5.5     |
|                  | very high   | 563     | 254.5   | 36.5    |
| TF/EMT           | high        | 55.5    | 11      | 3.5     |
|                  | very high   | 2350.46 | 1645.79 | 114.65  |



|                |          |       |      |     |
|----------------|----------|-------|------|-----|
|                | high     | 216   | 25.5 | 8   |
|                | high     | 217.5 | 59.5 | 4.5 |
| RECEPTOR       | very low | 0     | 1    | 9.5 |
|                | very low | 0     | 6.5  | 7.5 |
|                | very low | 0     | 1.5  | 10  |
| TRANSMEMB PROT | very low | 0     | 4.5  | 7   |
| RECEPTOR       | very low | 0     | 2    | 5.5 |

Log2(Distal vs. Prox) Log2(Mid vs. Prox) Log2(Distal vs. Mid)

|              |          |          |
|--------------|----------|----------|
| -19.55288766 | -0.56803 | -18.9849 |
| -6.828665428 | -5.60627 | -1.22239 |
| -6.721099189 | -4.26167 | -2.45943 |
| -6.50779464  | -4.18587 | -2.32193 |
| -6.407911378 | -0.0433  | -6.36461 |
| -6.377752795 | -3.44111 | -2.93664 |
| -5.190622495 | -2.99895 | -2.19167 |
| -4.98847813  | -3.75861 | -1.22987 |
| -4.857980995 | -2.78759 | -2.07039 |
| -4.754887502 | -3.43296 | -1.32193 |
| -4.739539538 | -2.35707 | -2.38247 |
| -4.636624621 | -3.3147  | -1.32193 |
| -4.459431619 | -2.1375  | -2.32193 |
| -4.178803153 | -3.34873 | -0.83007 |
| -4.169925001 | -1.58496 | -2.58496 |
| -4.169925001 | -1.36257 | -2.80735 |
| -4.087462841 | -3.08746 | -1       |
| -4.087462841 | -1.91754 | -2.16993 |
| -4.057328959 | -0.17384 | -3.88349 |
| -4.026348441 | -1.79697 | -2.22938 |
| -4.002361102 | -3.97087 | -0.03149 |
| -3.975752454 | -2.79518 | -1.18057 |
| -3.95419631  | -1.56188 | -2.39232 |
| -3.938599455 | -1.89907 | -2.03953 |
| -3.925999419 | -2.7885  | -1.1375  |
| -3.906890596 | -1.32193 | -2.58496 |
| -3.86507042  | -3.67243 | -0.19265 |
| -3.857980995 | -0.33442 | -3.52356 |
| -3.772589504 | -3.35755 | -0.41504 |
| -3.763765654 | -0.6763  | -3.08746 |
| -3.700439718 | -0.89308 | -2.80735 |
| -3.624490865 | -1.4021  | -2.22239 |
| -3.617752436 | -2.77529 | -0.84246 |
| -3.584962501 | -0.12553 | -3.45943 |
| -3.584962501 | -1.58496 | -2       |
| -3.561878888 | -2.78427 | -0.77761 |
| -3.533102944 | -2.31771 | -1.21539 |
| -3.528994279 | 0.231778 | -3.76077 |
| -3.523561956 | -1.9386  | -1.58496 |
| -3.459431619 | -0.1375  | -3.32193 |
| -3.459431619 | -0.45943 | -3       |
| -3.429392792 | -1.34533 | -2.08406 |
| -3.427930141 | -0.97786 | -2.45007 |
| -3.426264755 | -1.03395 | -2.39232 |
| -3.42202393  | -2.92862 | -0.49341 |
| -3.414081397 | -2.19388 | -1.22021 |
| -3.409390936 | -1.5025  | -1.90689 |

|              |          |          |
|--------------|----------|----------|
| -3.384220203 | -0.66319 | -2.72103 |
| -3.321928095 | -2.32193 | -1       |
| -3.321928095 | -0.51457 | -2.80735 |
| -3.321928095 | -3       | -0.32193 |
| -3.321928095 | -0.78588 | -2.53605 |
| -3.321928095 | -1       | -2.32193 |
| -3.314833083 | -2.24543 | -1.06941 |
| -3.268488836 | -2.558   | -0.71049 |
| -3.266140317 | -0.60318 | -2.66297 |
| -3.263034406 | -1.26303 | -2       |
| -3.220729372 | -3.04564 | -0.17509 |
| -3.189186904 | -0.72132 | -2.46787 |
| -3.173192715 | -1.81062 | -1.36257 |
| -3.169925001 | -0.58496 | -2.58496 |
| -3.169925001 | -1       | -2.16993 |
| -3.166753545 | -1.69237 | -1.47439 |
| -3.129283017 | -0.48543 | -2.64386 |
| -3.121461272 | -1.32529 | -1.79617 |
| -3.102538162 | -0.96153 | -2.14101 |
| -3.097147561 | -0.43534 | -2.66181 |
| -3.093976148 | -0.35147 | -2.7425  |
| -3.037193372 | -1.93336 | -1.10384 |
| -3.035979297 | -0.53005 | -2.50593 |
| -3           | -0.41504 | -2.58496 |
| -3           | -1.85316 | -1.14684 |
| -2.98486183  | -0.38308 | -2.60178 |
| -2.981514429 | -1.14769 | -1.83383 |
| -2.974909019 | -0.34104 | -2.63387 |
| -2.957393829 | -0.50841 | -2.44898 |
| -2.956931278 | -0.41504 | -2.54189 |
| -2.95419631  | -1.04731 | -1.90689 |
| -2.926920302 | -1.20075 | -1.72617 |
| -2.925999419 | -0.7885  | -2.1375  |
| -2.906890596 | -1.09954 | -1.80735 |
| -2.88849923  | -0.65891 | -2.22959 |
| -2.887525271 | -0.68589 | -2.20163 |
| -2.874469118 | -1.1375  | -1.73697 |
| -2.857980995 | -1.33442 | -1.52356 |
| -2.853451337 | -1.10343 | -1.75002 |
| -2.828330134 | 0.107368 | -2.9357  |
| -2.817135943 | -2.35147 | -0.46566 |
| -2.814444347 | -1.89107 | -0.92338 |
| -2.787940735 | -0.24434 | -2.5436  |
| -2.772589504 | -1.77259 | -1       |
| -2.772589504 | -1.16491 | -1.60768 |
| -2.754887502 | -0.35344 | -2.40145 |
| -2.748938236 | 0.261046 | -3.00998 |
| -2.723860607 | -0.73155 | -1.99231 |

|              |          |          |
|--------------|----------|----------|
| -2.702016721 | -2.41189 | -0.29013 |
| -2.700439718 | -0.24101 | -2.45943 |
| -2.700439718 | -1.37851 | -1.32193 |
| -2.700439718 | -1.37851 | -1.32193 |
| -2.700439718 | -1.70044 | -1       |
| -2.700439718 | -1.37851 | -1.32193 |
| -2.678071905 | -1.19265 | -1.48543 |
| -2.678071905 | -0.91254 | -1.76553 |
| -2.67379033  | -0.32965 | -2.34414 |
| -2.662965013 | -0.44057 | -2.22239 |
| -2.662965013 | -0.24793 | -2.41504 |
| -2.661504056 | -1.27448 | -1.38702 |
| -2.647246779 | -1.1348  | -1.51245 |
| -2.64385619  | -0.73697 | -1.90689 |
| -2.64385619  | -0.64386 | -2       |
| -2.64385619  | -1.47393 | -1.16993 |
| -2.624490865 | -2.20945 | -0.41504 |
| -2.624438944 | -1.08303 | -1.54141 |
| -2.622607275 | -0.0081  | -2.61451 |
| -2.605621971 | -1.47634 | -1.12928 |
| -2.60334103  | -1.49643 | -1.10692 |
| -2.594622336 | -1.43927 | -1.15535 |
| -2.589492159 | -2.27302 | -0.31647 |
| -2.586782936 | -1.6539  | -0.93289 |
| -2.584962501 | -0.63743 | -1.94753 |
| -2.584962501 | -0.26303 | -2.32193 |
| -2.584962501 | -0.58496 | -2       |
| -2.584962501 | -0.26303 | -2.32193 |
| -2.584962501 | -0.67807 | -1.90689 |
| -2.563768278 | -0.57736 | -1.98641 |
| -2.553927736 | -1.59282 | -0.96111 |
| -2.551512307 | -0.97742 | -1.57409 |
| -2.548972644 | -2.11834 | -0.43063 |
| -2.548436625 | -0.2854  | -2.26303 |
| -2.54584637  | -0.33111 | -2.21474 |
| -2.544320516 | -1.60572 | -0.9386  |
| -2.541794642 | -0.16215 | -2.37964 |
| -2.539975046 | -1.21501 | -1.32496 |
| -2.5360529   | -0.77052 | -1.76553 |
| -2.502500341 | -1.08746 | -1.41504 |
| -2.49082058  | -0.75186 | -1.73896 |
| -2.48956953  | -1.57144 | -0.91813 |
| -2.473931188 | -0.64386 | -1.83007 |
| -2.472416679 | -0.48658 | -1.98583 |
| -2.470503776 | -1.49517 | -0.97534 |
| -2.462189462 | -1.65426 | -0.80793 |
| -2.460801916 | -0.34842 | -2.11238 |
| -2.459431619 | -1.87447 | -0.58496 |

|              |          |          |
|--------------|----------|----------|
| -2.459431619 | -1.45943 | -1       |
| -2.444784843 | -0.94228 | -1.5025  |
| -2.419538892 | -1.06904 | -1.3505  |
| -2.415037499 | -0.19265 | -2.22239 |
| -2.398549376 | -0.45323 | -1.94532 |
| -2.397592365 | -0.70571 | -1.69188 |
| -2.389965616 | -0.05417 | -2.33579 |
| -2.389420466 | -0.76592 | -1.62351 |
| -2.385192988 | -1.01436 | -1.37084 |
| -2.380127862 | -0.20079 | -2.17934 |
| -2.379139356 | -1.81175 | -0.56739 |
| -2.37030509  | -1.32255 | -1.04775 |
| -2.36826274  | -0.66008 | -1.70818 |
| -2.361486043 | -1.15231 | -1.20917 |
| -2.353636955 | -0.46467 | -1.88897 |
| -2.353636955 | -0.66558 | -1.68806 |
| -2.349807127 | -0.09265 | -2.25716 |
| -2.337140838 | -1.98373 | -0.35341 |
| -2.336327309 | -0.64484 | -1.69148 |
| -2.332242312 | -0.10316 | -2.22908 |
| -2.3293839   | -0.42799 | -1.9014  |
| -2.325026935 | -0.43702 | -1.88801 |
| -2.321928095 | -1.73697 | -0.58496 |
| -2.321928095 | -0.08286 | -2.23907 |
| -2.321928095 | -0.8625  | -1.45943 |
| -2.321928095 | -1.32193 | -1       |
| -2.321928095 | -1       | -1.32193 |
| -2.321928095 | -1.09954 | -1.22239 |
| -2.31095234  | -1.84518 | -0.46577 |
| -2.307783913 | -1.2059  | -1.10188 |
| -2.303478032 | -0.55184 | -1.75164 |
| -2.296474321 | -0.96258 | -1.33389 |
| -2.291603558 | -0.16728 | -2.12433 |
| -2.290515142 | -1.50553 | -0.78499 |
| -2.289807398 | -2.05799 | -0.23182 |
| -2.284070951 | -0.75735 | -1.52672 |
| -2.277090456 | -0.8098  | -1.46729 |
| -2.26589406  | -1.02159 | -1.24431 |
| -2.26589406  | -0.95777 | -1.30812 |
| -2.26514919  | -0.19022 | -2.07493 |
| -2.263034406 | -0.45568 | -1.80735 |
| -2.263034406 | -1.26303 | -1       |
| -2.262507009 | -1.06749 | -1.19502 |
| -2.261637532 | -0.83151 | -1.43013 |
| -2.258152184 | -0.46761 | -1.79055 |
| -2.257916878 | -0.10606 | -2.15186 |
| -2.255394344 | -0.12902 | -2.12638 |
| -2.252534202 | -0.46004 | -1.7925  |

|              |          |          |
|--------------|----------|----------|
| -2.250140199 | -0.7763  | -1.47384 |
| -2.247927513 | -1.078   | -1.16993 |
| -2.244821603 | -1.20203 | -1.04279 |
| -2.2410081   | -0.53051 | -1.71049 |
| -2.239465935 | -0.16146 | -2.078   |
| -2.23878686  | -0.23399 | -2.0048  |
| -2.236067358 | -0.06971 | -2.16636 |
| -2.235429944 | -0.4524  | -1.78303 |
| -2.233463034 | -0.06879 | -2.16468 |
| -2.225917833 | -1.96529 | -0.26063 |
| -2.222392421 | -0.34792 | -1.87447 |
| -2.222392421 | -1       | -1.22239 |
| -2.222392421 | -0.80735 | -1.41504 |
| -2.216811389 | -0.98332 | -1.23349 |
| -2.213297212 | -0.99267 | -1.22062 |
| -2.209453366 | -0.45457 | -1.75489 |
| -2.201633861 | -0.35364 | -1.848   |
| -2.201633861 | -0.35364 | -1.848   |
| -2.193711677 | -0.27445 | -1.91927 |
| -2.191562651 | -1.43625 | -0.75531 |
| -2.18648011  | -0.03331 | -2.15317 |
| -2.182864057 | -0.50967 | -1.67319 |
| -2.172972347 | -0.81583 | -1.35714 |
| -2.169925001 | -0.31487 | -1.85505 |
| -2.156401557 | -0.23563 | -1.92077 |
| -2.151768871 | -0.63884 | -1.51293 |
| -2.146841388 | -0.04731 | -2.09954 |
| -2.146841388 | 0.090198 | -2.23704 |
| -2.14404637  | -1.22566 | -0.91839 |
| -2.137503524 | -1       | -1.1375  |
| -2.133473647 | -0.89308 | -1.24039 |
| -2.128607123 | -1.23598 | -0.89263 |
| -2.127335701 | -0.83417 | -1.29316 |
| -2.120031612 | -1.19236 | -0.92768 |
| -2.119147265 | -0.14323 | -1.97591 |
| -2.116554257 | -0.08766 | -2.02889 |
| -2.115477217 | -0.53051 | -1.58496 |
| -2.115477217 | -0.11548 | -2       |
| -2.115477217 | -1.11548 | -1       |
| -2.110590862 | 0.149799 | -2.26039 |
| -2.108706259 | -1.02938 | -1.07932 |
| -2.106915204 | -1       | -1.10692 |
| -2.099535674 | -0.93726 | -1.16227 |
| -2.099535674 | -1.90689 | -0.19265 |
| -2.097610797 | -1.83458 | -0.26303 |
| -2.096861539 | -0.59436 | -1.5025  |
| -2.094887948 | 0.172884 | -2.26777 |
| -2.093660046 | -0.88441 | -1.20925 |

|              |          |          |
|--------------|----------|----------|
| -2.091922489 | 0.214739 | -2.30666 |
| -2.089203875 | -0.68201 | -1.40719 |
| -2.087462841 | -0.76553 | -1.32193 |
| -2.078002512 | -0.49304 | -1.58496 |
| -2.076350886 | -0.95606 | -1.12029 |
| -2.075843758 | -1.06767 | -1.00817 |
| -2.073807269 | -0.44406 | -1.62974 |
| -2.070389328 | -0.30485 | -1.76553 |
| -2.067590695 | -0.10512 | -1.96247 |
| -2.064130337 | -0.25054 | -1.81359 |
| -2.063553698 | -0.20119 | -1.86236 |
| -2.058893689 | -0.64386 | -1.41504 |
| -2.058893689 | -1.64386 | -0.41504 |
| -2.051838932 | -1.28011 | -0.77173 |
| -2.048759312 | -1.16331 | -0.88545 |
| -2.044394119 | -0.95693 | -1.08746 |
| -2.044394119 | -1.34395 | -0.70044 |
| -2.040389124 | -0.68339 | -1.357   |
| -2.040061504 | -0.2106  | -1.82947 |
| -2.03562391  | 0.186769 | -2.22239 |
| -2.031395196 | -1.64845 | -0.38294 |
| -2.028797264 | -1.17242 | -0.85638 |
| -2.027201806 | -0.0869  | -1.9403  |
| -2.019942707 | -0.87188 | -1.14806 |
| -2.01459005  | -0.47864 | -1.53595 |
| -2.013605495 | -0.09248 | -1.92112 |
| -2.01227833  | -0.12776 | -1.88452 |
| -2.000894695 | -1.14576 | -0.85514 |
| -2           | -0.33015 | -1.66985 |
| -2           | -0.12553 | -1.87447 |
| -2           | -0.83007 | -1.16993 |
| -2           | -0.77761 | -1.22239 |
| -2           | -0.41504 | -1.58496 |
| -2           | -1       | -1       |
| -2           | -0.77761 | -1.22239 |
| -1.9946862   | -0.54558 | -1.44911 |
| -1.993544978 | -0.40858 | -1.58496 |
| -1.99208093  | -0.3517  | -1.64038 |
| -1.990234944 | -0.97773 | -1.01251 |
| -1.984762075 | -1.17042 | -0.81434 |
| -1.983353334 | -0.49832 | -1.48503 |
| -1.979778183 | -0.54268 | -1.43709 |
| -1.979040381 | -1.48966 | -0.48938 |
| -1.977898708 | -0.05036 | -1.92754 |
| -1.975437918 | -0.31957 | -1.65587 |
| -1.967135041 | -0.77593 | -1.1912  |
| -1.966833136 | -1       | -0.96683 |
| -1.964606093 | -0.04793 | -1.91667 |

|              |          |          |
|--------------|----------|----------|
| -1.962329582 | -1.0624  | -0.89993 |
| -1.96048803  | -1.098   | -0.86249 |
| -1.959358016 | -0.95936 | -1       |
| -1.958913696 | 0.168869 | -2.12778 |
| -1.954044864 | -0.4035  | -1.55054 |
| -1.953135531 | -1.30516 | -0.64797 |
| -1.951905712 | -0.63472 | -1.31719 |
| -1.941106311 | -0.26303 | -1.67807 |
| -1.934904972 | -0.63005 | -1.30485 |
| -1.934112064 | -0.53201 | -1.4021  |
| -1.932184616 | -1.02333 | -0.90885 |
| -1.931925991 | -0.32034 | -1.61158 |
| -1.926661761 | -0.90364 | -1.02303 |
| -1.924062012 | -0.27389 | -1.65017 |
| -1.923378718 | -0.40632 | -1.51706 |
| -1.921997488 | -0.35401 | -1.56799 |
| -1.919168925 | -0.00981 | -1.90935 |
| -1.91753784  | -1.5025  | -0.41504 |
| -1.91753784  | -0.22948 | -1.68806 |
| -1.9162764   | -0.99185 | -0.92442 |
| -1.912537159 | -1.35614 | -0.55639 |
| -1.911943823 | -0.28335 | -1.62859 |
| -1.910339074 | -1.02181 | -0.88852 |
| -1.907270702 | 0.058103 | -1.96537 |
| -1.906890596 | -1.58496 | -0.32193 |
| -1.906890596 | -1.09954 | -0.80735 |
| -1.904586936 | -0.58517 | -1.31941 |
| -1.894070145 | -1.04072 | -0.85335 |
| -1.893084796 | -0.45251 | -1.44057 |
| -1.889817082 | -0.27684 | -1.61298 |
| -1.889817082 | -0.6735  | -1.21632 |
| -1.885708994 | -0.26324 | -1.62247 |
| -1.885256826 | -0.07473 | -1.81053 |
| -1.884504752 | -0.12914 | -1.75537 |
| -1.881355504 | -1.32193 | -0.55943 |
| -1.880627911 | -0.00198 | -1.87865 |
| -1.879230492 | -0.07063 | -1.8086  |
| -1.878745357 | -0.56983 | -1.30891 |
| -1.876011696 | -0.51301 | -1.363   |
| -1.874469118 | -0.45943 | -1.41504 |
| -1.874469118 | -0.30968 | -1.56478 |
| -1.874469118 | -0.45943 | -1.41504 |
| -1.870458844 | -0.88707 | -0.98339 |
| -1.86913112  | -0.24269 | -1.62644 |
| -1.86507042  | -0.54314 | -1.32193 |
| -1.862496476 | -0.51457 | -1.34792 |
| -1.859822342 | -1.42489 | -0.43494 |
| -1.857980995 | -0.21412 | -1.64386 |



|              |          |          |
|--------------|----------|----------|
| -1.857419428 | -1.09344 | -0.76398 |
| -1.856534559 | -0.94995 | -0.90658 |
| -1.85553782  | -1.086   | -0.76954 |
| -1.853487438 | -0.42902 | -1.42447 |
| -1.851311397 | -0.79942 | -1.05189 |
| -1.850862274 | -0.91406 | -0.93681 |
| -1.847996907 | -0.442   | -1.40599 |
| -1.843907353 | 0.035255 | -1.87916 |
| -1.840344947 | -0.53746 | -1.30289 |
| -1.840219556 | -0.0756  | -1.76462 |
| -1.836501268 | -0.42146 | -1.41504 |
| -1.83616177  | -0.7338  | -1.10236 |
| -1.833990049 | -0.47491 | -1.35908 |
| -1.833990049 | -1.31316 | -0.52083 |
| -1.833473575 | -0.7048  | -1.12868 |
| -1.8259706   | -0.70044 | -1.12553 |
| -1.82339569  | -0.09035 | -1.73305 |
| -1.822923725 | -1.06601 | -0.75692 |
| -1.821134263 | -0.17397 | -1.64716 |
| -1.819175953 | -1.20925 | -0.60992 |
| -1.813176161 | -0.41956 | -1.39361 |
| -1.81128776  | -0.17813 | -1.63316 |
| -1.807354922 | -0.46234 | -1.34501 |
| -1.807354922 | -1.07039 | -0.73697 |
| -1.807354922 | -0.41504 | -1.39232 |
| -1.807354922 | -0.48543 | -1.32193 |
| -1.806127619 | -1.21831 | -0.58782 |
| -1.80604159  | -0.68915 | -1.11689 |
| -1.801454321 | -0.34912 | -1.45234 |
| -1.797820854 | -0.10626 | -1.69156 |
| -1.796282023 | -0.18509 | -1.61119 |
| -1.794809669 | -0.46416 | -1.33065 |
| -1.793193385 | -0.38277 | -1.41042 |
| -1.792103542 | -0.84295 | -0.94915 |
| -1.790431619 | -0.34805 | -1.44238 |
| -1.789463322 | -0.0525  | -1.73697 |
| -1.788495895 | -0.60407 | -1.18442 |
| -1.788296586 | -1.19536 | -0.59293 |
| -1.781718995 | -1.15136 | -0.63035 |
| -1.777607579 | -0.09311 | -1.6845  |
| -1.777036779 | -1.23847 | -0.53857 |
| -1.775293713 | 0        | -1.77529 |
| -1.772044024 | -0.33879 | -1.43326 |
| -1.771375625 | -0.42479 | -1.34659 |
| -1.770132458 | -0.63925 | -1.13088 |
| -1.769516166 | -0.33047 | -1.43904 |
| -1.766441117 | -0.95819 | -0.80825 |
| -1.765534746 | -0.91754 | -0.848   |

|              |          |          |
|--------------|----------|----------|
| -1.760812336 | -0.13632 | -1.62449 |
| -1.760439207 | -0.45886 | -1.30158 |
| -1.760343929 | -0.68385 | -1.0765  |
| -1.756276273 | -0.96621 | -0.79007 |
| -1.754887502 | -1.16993 | -0.58496 |
| -1.753614723 | -0.11664 | -1.63697 |
| -1.752748591 | -0.58298 | -1.16977 |
| -1.752147466 | -0.23579 | -1.51635 |
| -1.752072487 | -0.67207 | -1.08    |
| -1.750452531 | -0.54986 | -1.20059 |
| -1.748864908 | -0.22889 | -1.51997 |
| -1.748020783 | -0.50986 | -1.23816 |
| -1.741081703 | -0.22651 | -1.51457 |
| -1.736965594 | -1.42884 | -0.30812 |
| -1.736965594 | -1.32193 | -0.41504 |
| -1.736965594 | -0.51457 | -1.22239 |
| -1.736965594 | -0.41504 | -1.32193 |
| -1.736965594 | -0.152   | -1.58496 |
| -1.736009195 | -0.4354  | -1.30061 |
| -1.734992216 | -0.39409 | -1.3409  |
| -1.734798572 | -0.16617 | -1.56863 |
| -1.734792451 | -0.77749 | -0.9573  |
| -1.73289593  | -0.1822  | -1.55069 |
| -1.730435384 | -0.27213 | -1.45831 |
| -1.725270455 | -1.20572 | -0.51955 |
| -1.723695357 | -0.07405 | -1.64964 |
| -1.723290657 | -0.34269 | -1.3806  |
| -1.722466024 | -0.0902  | -1.63227 |
| -1.720983296 | -0.65526 | -1.06572 |
| -1.71666818  | 0.047618 | -1.76429 |
| -1.714842783 | -0.56598 | -1.14886 |
| -1.709035268 | -0.38236 | -1.32668 |
| -1.707819249 | -0.48543 | -1.22239 |
| -1.700439718 | -0.58496 | -1.11548 |
| -1.700439718 | -1.37851 | -0.32193 |
| -1.697620301 | -0.25628 | -1.44134 |
| -1.693896872 | 0.009228 | -1.70313 |
| -1.691381791 | -1.16856 | -0.52283 |
| -1.688641147 | -0.60618 | -1.08246 |
| -1.688383461 | -0.75043 | -0.93795 |
| -1.688055994 | -0.05063 | -1.63743 |
| -1.68589141  | -1.03953 | -0.64636 |
| -1.684067554 | -0.30946 | -1.37461 |
| -1.683972507 | -1.41014 | -0.27383 |
| -1.6830475   | -0.28625 | -1.3968  |
| -1.681366985 | -0.79099 | -0.89038 |
| -1.680435632 | -0.95086 | -0.72958 |
| -1.68028746  | -0.80851 | -0.87178 |

|              |          |          |
|--------------|----------|----------|
| -1.678071905 | -0.29956 | -1.37851 |
| -1.676389528 | -0.39722 | -1.27917 |
| -1.676128771 | -0.18663 | -1.4895  |
| -1.671550186 | -1.07179 | -0.59976 |
| -1.669851398 | -0.51457 | -1.15528 |
| -1.666175463 | -1.35219 | -0.31398 |
| -1.664396968 | -0.23581 | -1.42858 |
| -1.662965013 | -0.44057 | -1.22239 |
| -1.66226446  | -1.03756 | -0.62471 |
| -1.659924558 | -0.5409  | -1.11902 |
| -1.652076697 | -1.28951 | -0.36257 |
| -1.652076697 | -0.1375  | -1.51457 |
| -1.650341654 | -0.24801 | -1.40233 |
| -1.649813645 | -0.77987 | -0.86994 |
| -1.648834684 | -0.1749  | -1.47393 |
| -1.645504043 | -1.0066  | -0.6389  |
| -1.644348964 | -0.33708 | -1.30727 |
| -1.6440899   | -0.39014 | -1.25395 |
| -1.64385619  | -0.57061 | -1.07325 |
| -1.64385619  | -0.8365  | -0.80735 |
| -1.641333041 | -0.34898 | -1.29235 |
| -1.637689077 | -0.04116 | -1.59653 |
| -1.635588574 | -0.05063 | -1.58496 |
| -1.634880375 | -0.4682  | -1.16668 |
| -1.63005039  | -0.30355 | -1.3265  |
| -1.62881679  | -0.2188  | -1.41002 |
| -1.62688395  | -0.61981 | -1.00707 |
| -1.625934282 | -0.5649  | -1.06103 |
| -1.622930351 | -0.86306 | -0.75987 |
| -1.619139489 | -0.96508 | -0.65406 |
| -1.618268587 | -0.59548 | -1.02279 |
| -1.615598522 | -0.15418 | -1.46142 |
| -1.610725597 | -0.82018 | -0.79055 |
| -1.610654223 | 0.114992 | -1.72565 |
| -1.608634239 | -0.80204 | -0.80659 |
| -1.607682577 | 0.0917   | -1.69938 |
| -1.605196984 | -0.28817 | -1.31703 |
| -1.601696516 | -0.2512  | -1.3505  |
| -1.600904045 | -0.29834 | -1.30256 |
| -1.600456727 | -0.69946 | -0.901   |
| -1.599037686 | -0.36457 | -1.23447 |
| -1.59821535  | -0.63954 | -0.95867 |
| -1.597645616 | -1.06126 | -0.53638 |
| -1.597562538 | -0.91475 | -0.68281 |
| -1.596177288 | -0.10422 | -1.49196 |
| -1.593448967 | -0.20417 | -1.38927 |
| -1.592313829 | -0.33482 | -1.2575  |
| -1.589408406 | 0.214125 | -1.80353 |

|              |          |          |
|--------------|----------|----------|
| -1.589336298 | -0.74993 | -0.83941 |
| -1.586137812 | -0.04172 | -1.54442 |
| -1.584962501 | -1.09954 | -0.48543 |
| -1.584962501 | -0.39148 | -1.19348 |
| -1.584962501 | -0.72833 | -0.85664 |
| -1.584962501 | -0.94111 | -0.64386 |
| -1.584962501 | -0.90689 | -0.67807 |
| -1.584962501 | -0.87447 | -0.71049 |
| -1.584962501 | -1       | -0.58496 |
| -1.58221189  | 0.019145 | -1.60136 |
| -1.58060115  | -0.25369 | -1.32691 |
| -1.579855953 | -0.0273  | -1.55255 |
| -1.577730931 | -0.20061 | -1.37712 |
| -1.575563803 | -1.26492 | -0.31064 |
| -1.575526649 | -0.26912 | -1.3064  |
| -1.573949014 | -0.06822 | -1.50573 |
| -1.569263814 | -1.04815 | -0.52112 |
| -1.568427133 | -0.34076 | -1.22767 |
| -1.563549194 | -0.0634  | -1.50015 |
| -1.5632569   | -0.4665  | -1.09675 |
| -1.562885635 | -0.40138 | -1.1615  |
| -1.562098392 | -0.67163 | -0.89047 |
| -1.561547043 | -0.23089 | -1.33066 |
| -1.560509457 | -1.16993 | -0.39058 |
| -1.560298816 | -0.12703 | -1.43327 |
| -1.558730959 | -1.04026 | -0.51847 |
| -1.555874012 | -0.10886 | -1.44702 |
| -1.554588852 | -0.6477  | -0.90689 |
| -1.553286024 | -0.4902  | -1.06308 |
| -1.552541023 | -0.75899 | -0.79355 |
| -1.547487795 | -0.26684 | -1.28065 |
| -1.547487795 | -0.60407 | -0.94342 |
| -1.545741191 | -0.44953 | -1.09622 |
| -1.544732656 | -0.56325 | -0.98149 |
| -1.544573377 | 0.212607 | -1.75718 |
| -1.543443231 | -0.40455 | -1.1389  |
| -1.543306068 | -0.50214 | -1.04116 |
| -1.542527234 | -0.39366 | -1.14886 |
| -1.54220969  | -0.53318 | -1.00903 |
| -1.540986341 | -0.02377 | -1.51721 |
| -1.540568381 | -1.41504 | -0.12553 |
| -1.538419915 | -0.53842 | -1       |
| -1.537133976 | -0.91095 | -0.62619 |
| -1.5360529   | -0.53605 | -1       |
| -1.5334322   | -1.38904 | -0.14439 |
| -1.532793537 | -0.01709 | -1.5157  |
| -1.530514717 | -0.05658 | -1.47393 |
| -1.527963    | -0.67997 | -0.848   |

|              |          |          |
|--------------|----------|----------|
| -1.52666386  | -0.63798 | -0.88868 |
| -1.525603256 | -0.81333 | -0.71227 |
| -1.524295137 | -0.53408 | -0.99022 |
| -1.523561956 | -0.9386  | -0.58496 |
| -1.52177069  | -0.80273 | -0.71904 |
| -1.518138148 | -0.29622 | -1.22192 |
| -1.515699838 | -0.09785 | -1.41785 |
| -1.514573173 | -0.62149 | -0.89308 |
| -1.514573173 | -0.152   | -1.36257 |
| -1.514541645 | -0.13453 | -1.38001 |
| -1.51316115  | -0.69154 | -0.82162 |
| -1.511018541 | -0.40526 | -1.10576 |
| -1.508611615 | -0.70765 | -0.80097 |
| -1.507279639 | -0.58974 | -0.91754 |
| -1.505945995 | -1.13558 | -0.37037 |
| -1.503324032 | -1.18757 | -0.31575 |
| -1.502500341 | -1.08746 | -0.41504 |
| -1.500693584 | -0.11277 | -1.38793 |
| -1.495365064 | -1.0166  | -0.47876 |
| -1.494496691 | -0.08084 | -1.41365 |
| -1.492216991 | -0.41046 | -1.08176 |
| -1.487749926 | -0.74749 | -0.74025 |
| -1.485426827 | -0.10692 | -1.37851 |
| -1.485426827 | -0.22239 | -1.26303 |
| -1.485426827 | -0.10692 | -1.37851 |
| -1.483856689 | -0.26986 | -1.214   |
| -1.482890591 | -0.45943 | -1.02346 |
| -1.481262032 | -0.10223 | -1.37903 |
| -1.481100065 | -0.2363  | -1.2448  |
| -1.478903178 | -0.08078 | -1.39812 |
| -1.477672147 | -0.29815 | -1.17952 |
| -1.477047162 | -0.97226 | -0.50479 |
| -1.473931188 | -0.39593 | -1.078   |
| -1.46994584  | -0.12126 | -1.34868 |
| -1.469728141 | -0.16539 | -1.30433 |
| -1.469485283 | -0.26303 | -1.20645 |
| -1.468645034 | -0.08073 | -1.38792 |
| -1.468032174 | -0.12916 | -1.33887 |
| -1.466983446 | -0.10403 | -1.36296 |
| -1.464004348 | 0.100974 | -1.56498 |
| -1.4639471   | -0.89566 | -0.56828 |
| -1.46132021  | -0.14941 | -1.31192 |
| -1.461198112 | -0.26685 | -1.19435 |
| -1.460850412 | -0.47148 | -0.98937 |
| -1.459431619 | -0.87447 | -0.58496 |
| -1.459431619 | -0.65208 | -0.80735 |
| -1.459431619 | -1.1375  | -0.32193 |
| -1.458809901 | -1.05063 | -0.40818 |

|              |          |          |
|--------------|----------|----------|
| -1.458722503 | -1.41646 | -0.04227 |
| -1.456638404 | -0.6893  | -0.76734 |
| -1.455451768 | -0.16744 | -1.28802 |
| -1.455153549 | -0.26719 | -1.18796 |
| -1.453547062 | -0.8192  | -0.63435 |
| -1.452757165 | -0.01286 | -1.4399  |
| -1.452111335 | -0.64897 | -0.80314 |
| -1.450661409 | -1.27009 | -0.18057 |
| -1.449935707 | -0.45739 | -0.99254 |
| -1.447458977 | -0.38333 | -1.06413 |
| -1.447458977 | -0.81943 | -0.62803 |
| -1.446104006 | -0.45626 | -0.98984 |
| -1.445799753 | -0.05585 | -1.38995 |
| -1.444099965 | -0.98772 | -0.45638 |
| -1.440572591 | -0.44057 | -1       |
| -1.440572591 | 0.049753 | -1.49033 |
| -1.440572591 | -0.24793 | -1.19265 |
| -1.438401492 | -1.09427 | -0.34413 |
| -1.438121112 | -0.69188 | -0.74624 |
| -1.436168964 | -0.78526 | -0.65091 |
| -1.433400433 | -0.20096 | -1.23244 |
| -1.432959407 | -1.16993 | -0.26303 |
| -1.432959407 | -0.05445 | -1.37851 |
| -1.432959407 | -0.43296 | -1       |
| -1.431514545 | 0.234321 | -1.66584 |
| -1.430709657 | -0.29703 | -1.13368 |
| -1.430239906 | -0.35869 | -1.07155 |
| -1.426311818 | -0.27921 | -1.1471  |
| -1.425996711 | -0.10344 | -1.32256 |
| -1.425699812 | -0.52367 | -0.90202 |
| -1.424411052 | -0.19571 | -1.2287  |
| -1.423681594 | -0.20675 | -1.21693 |
| -1.4230066   | -0.42071 | -1.0023  |
| -1.417505755 | -0.00742 | -1.41009 |
| -1.416895445 | -0.90828 | -0.50861 |
| -1.415037499 | -0.09311 | -1.32193 |
| -1.415037499 | -0.30968 | -1.10535 |
| -1.413937465 | -0.29373 | -1.12021 |
| -1.410128699 | -0.80441 | -0.60572 |
| -1.408084739 | -0.69349 | -0.7146  |
| -1.405759972 | -0.72484 | -0.68092 |
| -1.401571432 | -1.27117 | -0.1304  |
| -1.399607459 | -0.34104 | -1.05857 |
| -1.399103191 | -0.65988 | -0.73922 |
| -1.398375386 | -0.7515  | -0.64688 |
| -1.397453187 | -0.11809 | -1.27936 |
| -1.396890153 | -0.10084 | -1.29605 |
| -1.396859804 | -0.42581 | -0.97105 |

|              |          |          |
|--------------|----------|----------|
| -1.394605599 | -1.07268 | -0.32193 |
| -1.394440595 | -0.21957 | -1.17487 |
| -1.393431043 | -0.22437 | -1.16906 |
| -1.392317423 | -0.76783 | -0.62449 |
| -1.392317423 | -0.6644  | -0.72792 |
| -1.391540809 | -0.09375 | -1.29779 |
| -1.391037625 | -0.50104 | -0.89    |
| -1.388213711 | -0.0836  | -1.30461 |
| -1.385805451 | -0.39423 | -0.99158 |
| -1.384759411 | -0.16399 | -1.22077 |
| -1.38416989  | -0.80691 | -0.57726 |
| -1.383989063 | -0.67262 | -0.71137 |
| -1.381542951 | -0.48521 | -0.89633 |
| -1.380480277 | -1.03317 | -0.34731 |
| -1.3800849   | -0.39551 | -0.98457 |
| -1.378777093 | -0.08379 | -1.29499 |
| -1.375039431 | -1.28758 | -0.08746 |
| -1.374596086 | -0.25294 | -1.12165 |
| -1.374395515 | -0.32193 | -1.05247 |
| -1.374395515 | -0.3744  | -1       |
| -1.371831389 | -0.7129  | -0.65893 |
| -1.3713243   | -0.40177 | -0.96956 |
| -1.36923381  | -0.04731 | -1.32193 |
| -1.366963702 | -0.29165 | -1.07531 |
| -1.363922184 | -0.70963 | -0.65429 |
| -1.362570079 | -0.16993 | -1.19265 |
| -1.361894502 | -0.00791 | -1.35399 |
| -1.360839191 | -0.41908 | -0.94175 |
| -1.358476726 | -0.55916 | -0.79931 |
| -1.356419951 | -0.22354 | -1.13288 |
| -1.354842717 | -0.76988 | -0.58496 |
| -1.354566911 | -0.51611 | -0.83846 |
| -1.35425715  | -0.48799 | -0.86627 |
| -1.353264646 | -0.16115 | -1.19211 |
| -1.352516415 | -0.43468 | -0.91784 |
| -1.350497247 | -0.54314 | -0.80735 |
| -1.350497247 | -0.38702 | -0.96347 |
| -1.350221687 | -0.40695 | -0.94328 |
| -1.349334252 | 0.023084 | -1.37242 |
| -1.347413066 | -0.1518  | -1.19562 |
| -1.347406023 | -0.46916 | -0.87825 |
| -1.347376172 | -0.11574 | -1.23164 |
| -1.347373111 | -0.10026 | -1.24712 |
| -1.347060705 | -0.33504 | -1.01202 |
| -1.345693561 | -0.76035 | -0.58534 |
| -1.344529524 | -1       | -0.34453 |
| -1.343580665 | -0.34001 | -1.00357 |
| -1.343301746 | -0.6545  | -0.6888  |

|              |          |          |
|--------------|----------|----------|
| -1.342887714 | -0.15355 | -1.18934 |
| -1.341036918 | -0.44057 | -0.90046 |
| -1.341036918 | 0.127112 | -1.46815 |
| -1.340306624 | -0.28638 | -1.05392 |
| -1.338801913 | -0.21681 | -1.12199 |
| -1.33872243  | -0.77509 | -0.56364 |
| -1.338322533 | -0.19681 | -1.14151 |
| -1.337890255 | -0.10981 | -1.22808 |
| -1.336464188 | -0.5581  | -0.77837 |
| -1.336414562 | -1.05136 | -0.28506 |
| -1.335897279 | -0.32038 | -1.01551 |
| -1.335603032 | -0.02748 | -1.30812 |
| -1.335420331 | -0.68422 | -0.6512  |
| -1.334867151 | -0.33704 | -0.99783 |
| -1.333423734 | -0.39232 | -0.94111 |
| -1.331631947 | -0.25309 | -1.07854 |
| -1.331488324 | -0.02024 | -1.31125 |
| -1.330083282 | -0.56563 | -0.76445 |
| -1.329307625 | -0.46496 | -0.86434 |
| -1.3272863   | -0.46016 | -0.86713 |
| -1.325412266 | -0.3865  | -0.93892 |
| -1.323675757 | -0.75336 | -0.57032 |
| -1.321928095 | -0.67423 | -0.6477  |
| -1.321928095 | -0.152   | -1.16993 |
| -1.321928095 | 0.263034 | -1.58496 |
| -1.321928095 | -1       | -0.32193 |
| -1.321928095 | -0.32193 | -1       |
| -1.321928095 | -0.73697 | -0.58496 |
| -1.321928095 | -1.05889 | -0.26303 |
| -1.321928095 | -0.18442 | -1.1375  |
| -1.321928095 | -0.60768 | -0.71425 |
| -1.320272045 | -0.1673  | -1.15297 |
| -1.314178595 | -0.28233 | -1.03185 |
| -1.312013028 | -0.42083 | -0.89118 |
| -1.311838743 | -0.90917 | -0.40267 |
| -1.311198497 | -0.74835 | -0.56284 |
| -1.310612798 | -0.6164  | -0.69422 |
| -1.309875736 | -0.47204 | -0.83783 |
| -1.309844027 | -0.44648 | -0.86337 |
| -1.308752706 | -0.61844 | -0.69032 |
| -1.30859115  | -0.32918 | -0.97941 |
| -1.307768488 | -0.95257 | -0.3552  |
| -1.307054818 | 0.221324 | -1.52838 |
| -1.306943692 | -0.11844 | -1.18851 |
| -1.304928187 | -0.14465 | -1.16027 |
| -1.304795812 | -0.25535 | -1.04945 |
| -1.304296295 | -0.23536 | -1.06894 |
| -1.302028537 | -0.22039 | -1.08164 |



|              |          |          |
|--------------|----------|----------|
| -1.297543936 | -0.49134 | -0.8062  |
| -1.297064584 | -0.19898 | -1.09808 |
| -1.295455884 | -0.11103 | -1.18442 |
| -1.295455884 | -0.36257 | -0.93289 |
| -1.293120132 | -0.075   | -1.21812 |
| -1.290996235 | -0.57384 | -0.71716 |
| -1.289506617 | -1.1375  | -0.152   |
| -1.289506617 | -0.50524 | -0.78427 |
| -1.289147246 | -0.33533 | -0.95381 |
| -1.288581591 | -0.0663  | -1.22228 |
| -1.287007251 | -0.32041 | -0.9666  |
| -1.286881148 | -0.30869 | -0.9782  |
| -1.284746317 | -0.30063 | -0.98412 |
| -1.284374895 | -0.69427 | -0.59011 |
| -1.283401255 | -0.1342  | -1.1492  |
| -1.282933963 | -0.25909 | -1.02385 |
| -1.280107919 | -1.23947 | -0.04064 |
| -1.280107919 | 0.160465 | -1.44057 |
| -1.280107919 | -0.18057 | -1.09954 |
| -1.280107919 | -0.76553 | -0.51457 |
| -1.280074027 | -0.35881 | -0.92126 |
| -1.279254758 | -0.41376 | -0.8655  |
| -1.278301162 | -0.43201 | -0.84629 |
| -1.27694064  | 0.260857 | -1.5378  |
| -1.276840205 | -1.0624  | -0.21444 |
| -1.276648523 | -0.40269 | -0.87395 |
| -1.275751503 | -0.68903 | -0.58672 |
| -1.275724271 | -0.46657 | -0.80915 |
| -1.275634443 | -0.65783 | -0.61781 |
| -1.273268463 | -0.25347 | -1.0198  |
| -1.273018494 | -0.21412 | -1.05889 |
| -1.272525855 | -0.26445 | -1.00807 |
| -1.272340568 | -0.18742 | -1.08492 |
| -1.271302022 | -0.91983 | -0.35147 |
| -1.26960706  | -0.57679 | -0.69282 |
| -1.266376742 | -0.02283 | -1.24354 |
| -1.265172773 | -0.12112 | -1.14405 |
| -1.264415636 | -0.71301 | -0.55141 |
| -1.264209566 | -0.31792 | -0.94629 |
| -1.264075284 | -0.56627 | -0.6978  |
| -1.264021817 | -0.08797 | -1.17605 |
| -1.263552522 | -0.47768 | -0.78588 |
| -1.263077523 | -0.19173 | -1.07135 |
| -1.263034406 | -0.12553 | -1.1375  |
| -1.262193429 | -0.58917 | -0.67302 |
| -1.260108582 | -0.38956 | -0.87055 |
| -1.25976783  | -0.57869 | -0.68108 |
| -1.259278084 | -0.50399 | -0.75528 |

|              |          |          |
|--------------|----------|----------|
| -1.259044505 | -0.19103 | -1.06802 |
| -1.255771385 | -0.85302 | -0.40275 |
| -1.255257055 | -0.78319 | -0.47207 |
| -1.255257055 | -1.16506 | -0.0902  |
| -1.254572827 | -0.45811 | -0.79647 |
| -1.254274863 | -0.46105 | -0.79323 |
| -1.253943182 | -0.06804 | -1.1859  |
| -1.252607034 | -0.30705 | -0.94555 |
| -1.252454134 | -0.20968 | -1.04278 |
| -1.252387162 | -0.48187 | -0.77052 |
| -1.252054879 | -0.21097 | -1.04109 |
| -1.25181828  | -0.07052 | -1.1813  |
| -1.250448442 | -0.07976 | -1.17069 |
| -1.249904602 | -0.47381 | -0.77609 |
| -1.247927513 | 0.183122 | -1.43105 |
| -1.247742754 | -0.14938 | -1.09837 |
| -1.24691474  | -0.13588 | -1.11103 |
| -1.242060368 | -0.02622 | -1.21584 |
| -1.240432977 | -1.14639 | -0.09404 |
| -1.238412438 | -0.44589 | -0.79252 |
| -1.237039197 | -0.18641 | -1.05063 |
| -1.235073003 | -0.32279 | -0.91228 |
| -1.234669889 | -0.03163 | -1.20304 |
| -1.233619677 | -0.53318 | -0.70044 |
| -1.233035045 | -0.25967 | -0.97336 |
| -1.230910203 | -0.2384  | -0.99251 |
| -1.229047709 | -0.57423 | -0.65482 |
| -1.229025514 | -0.4553  | -0.77372 |
| -1.225231286 | -0.5408  | -0.68443 |
| -1.223774975 | -0.59119 | -0.63258 |
| -1.222392421 | -0.41504 | -0.80735 |
| -1.222392421 | -0.14439 | -1.078   |
| -1.222392421 | -0.22239 | -1       |
| -1.221243779 | -0.65245 | -0.5688  |
| -1.220551075 | -0.91416 | -0.30639 |
| -1.219025875 | -0.21754 | -1.00148 |
| -1.217805152 | -0.07062 | -1.14719 |
| -1.217781601 | -0.01949 | -1.1983  |
| -1.216726145 | -0.27583 | -0.94089 |
| -1.215947969 | -0.02497 | -1.19098 |
| -1.215012891 | -0.54663 | -0.66838 |
| -1.214399631 | -0.25072 | -0.96368 |
| -1.213364263 | -0.89775 | -0.31561 |
| -1.212734926 | -0.34314 | -0.8696  |
| -1.21191909  | -0.20282 | -1.0091  |
| -1.211504105 | -0.03317 | -1.17834 |
| -1.210344794 | -0.24602 | -0.96432 |
| -1.209461842 | -0.81863 | -0.39083 |

|              |          |          |
|--------------|----------|----------|
| -1.208955513 | -0.30616 | -0.90279 |
| -1.208442345 | -0.48656 | -0.72188 |
| -1.206653774 | -0.18851 | -1.01815 |
| -1.206450877 | -0.152   | -1.05445 |
| -1.204786433 | -0.41876 | -0.78603 |
| -1.204311649 | -0.01896 | -1.18535 |
| -1.203283598 | -0.45686 | -0.74643 |
| -1.201851058 | -0.70626 | -0.49559 |
| -1.201633861 | -0.82312 | -0.37851 |
| -1.1992347   | -0.04781 | -1.15143 |
| -1.197939378 | -0.96347 | -0.23447 |
| -1.197076608 | -0.04638 | -1.15069 |
| -1.196892049 | -0.58496 | -0.61193 |
| -1.196247315 | -0.53372 | -0.66253 |
| -1.196122388 | -0.07603 | -1.12009 |
| -1.196121072 | -0.48675 | -0.70937 |
| -1.194994885 | -0.11337 | -1.08162 |
| -1.194615194 | -0.20211 | -0.99251 |
| -1.193499713 | -0.45061 | -0.74289 |
| -1.192645078 | -1.12553 | -0.06711 |
| -1.192645078 | -0.67807 | -0.51457 |
| -1.192126378 | -0.5398  | -0.65233 |
| -1.190420032 | -0.84264 | -0.34778 |
| -1.188445089 | -0.0148  | -1.17365 |
| -1.187232432 | -0.40154 | -0.78569 |
| -1.186700865 | -0.27672 | -0.90998 |
| -1.18570029  | -0.11446 | -1.07124 |
| -1.185266493 | -0.11815 | -1.06711 |
| -1.184963796 | -0.04046 | -1.14451 |
| -1.184424571 | -0.39593 | -0.7885  |
| -1.184337659 | -0.1585  | -1.02584 |
| -1.181606806 | -0.32971 | -0.8519  |
| -1.180555488 | -0.79036 | -0.3902  |
| -1.178337241 | -0.29698 | -0.88136 |
| -1.176322773 | -0.32033 | -0.85599 |
| -1.175810285 | -0.03076 | -1.14505 |
| -1.174404792 | -0.44406 | -0.73034 |
| -1.172639386 | -0.31382 | -0.85882 |
| -1.171611378 | -0.22085 | -0.95076 |
| -1.170872132 | -0.55959 | -0.61128 |
| -1.170470135 | -0.33741 | -0.83306 |
| -1.170114245 | -0.40348 | -0.76664 |
| -1.169925001 | -0.43296 | -0.73697 |
| -1.169925001 | -0.30533 | -0.8646  |
| -1.169925001 | -0.05445 | -1.11548 |
| -1.169925001 | -1       | -0.16993 |
| -1.167924869 | -0.2367  | -0.93123 |
| -1.165737204 | -0.81155 | -0.35418 |

|              |          |          |
|--------------|----------|----------|
| -1.164386818 | -0.00742 | -1.15697 |
| -1.16411938  | -0.31516 | -0.84896 |
| -1.163780261 | -1.07957 | -0.08421 |
| -1.1627295   | -0.05889 | -1.10384 |
| -1.162402043 | -0.36814 | -0.79426 |
| -1.161797121 | -0.13669 | -1.02511 |
| -1.160464672 | -1.078   | -0.08246 |
| -1.158591911 | -1.11851 | -0.04008 |
| -1.158271571 | -0.51298 | -0.64529 |
| -1.157616932 | -0.0902  | -1.06741 |
| -1.157541277 | -0.0898  | -1.06774 |
| -1.156119202 | -0.1727  | -0.98342 |
| -1.155278225 | -0.75673 | -0.39855 |
| -1.154722595 | -0.31279 | -0.84194 |
| -1.153656612 | -0.44611 | -0.70755 |
| -1.15324626  | -0.47207 | -0.68118 |
| -1.152003093 | -0.8625  | -0.28951 |
| -1.150242636 | -0.4634  | -0.68684 |
| -1.149752412 | -0.77764 | -0.37211 |
| -1.147513754 | -0.12442 | -1.02309 |
| -1.147319388 | -0.2932  | -0.85412 |
| -1.145850866 | -0.37851 | -0.76734 |
| -1.145010337 | -0.27319 | -0.87182 |
| -1.14345279  | -0.21056 | -0.93289 |
| -1.143257051 | -0.09646 | -1.04679 |
| -1.140862536 | -0.73976 | -0.4011  |
| -1.140473561 | -0.06553 | -1.07495 |
| -1.140321288 | -0.06477 | -1.07555 |
| -1.139634536 | -0.09536 | -1.04428 |
| -1.138842728 | -0.74879 | -0.39005 |
| -1.138699197 | -0.11659 | -1.02211 |
| -1.137503524 | -0.45943 | -0.67807 |
| -1.137503524 | -0.1375  | -1       |
| -1.136136688 | -0.55318 | -0.58296 |
| -1.134948863 | -0.31408 | -0.82087 |
| -1.134880892 | -0.58036 | -0.55452 |
| -1.134003955 | -0.02485 | -1.10916 |
| -1.133902983 | -0.28815 | -0.84576 |
| -1.132125038 | -0.102   | -1.03012 |
| -1.131598022 | -0.0835  | -1.0481  |
| -1.131244533 | -0.71621 | -0.41504 |
| -1.130422497 | -0.28283 | -0.84759 |
| -1.129283017 | -0.55293 | -0.57635 |
| -1.129013077 | -0.32301 | -0.806   |
| -1.128947857 | -0.4421  | -0.68684 |
| -1.128680214 | -0.44927 | -0.67941 |
| -1.127859002 | -0.87668 | -0.25118 |
| -1.127731558 | -0.15959 | -0.96814 |

|              |          |          |
|--------------|----------|----------|
| -1.127395907 | -0.23377 | -0.89363 |
| -1.12701641  | -0.32704 | -0.79998 |
| -1.124684975 | -0.16441 | -0.96028 |
| -1.123988717 | -0.47865 | -0.64534 |
| -1.121990524 | -0.8519  | -0.27009 |
| -1.121990524 | -0.30256 | -0.81943 |
| -1.11990479  | -0.53149 | -0.58841 |
| -1.119460155 | -0.52562 | -0.59384 |
| -1.117641611 | -0.19272 | -0.92492 |
| -1.116586556 | -0.04048 | -1.0761  |
| -1.116025823 | -0.33931 | -0.77672 |
| -1.115477217 | -0.89308 | -0.22239 |
| -1.115477217 | -0.37851 | -0.73697 |
| -1.115477217 | -0.05658 | -1.05889 |
| -1.115347653 | -0.53491 | -0.58044 |
| -1.114943578 | -0.10975 | -1.00519 |
| -1.114873958 | -0.07619 | -1.03868 |
| -1.114678604 | -0.08896 | -1.02572 |
| -1.114549539 | -0.26551 | -0.84904 |
| -1.114419911 | -0.10529 | -1.00913 |
| -1.114332675 | -0.04891 | -1.06542 |
| -1.113253635 | -0.075   | -1.03825 |
| -1.113062664 | -0.59223 | -0.52083 |
| -1.112276815 | -0.05886 | -1.05342 |
| -1.112150734 | -0.31595 | -0.7962  |
| -1.111471742 | -0.27694 | -0.83453 |
| -1.110968096 | -0.12543 | -0.98554 |
| -1.110638127 | -0.16816 | -0.94248 |
| -1.109848767 | -0.4393  | -0.67055 |
| -1.108519253 | -0.49067 | -0.61785 |
| -1.108059746 | -0.06075 | -1.04731 |
| -1.106742407 | -0.13705 | -0.96969 |
| -1.105847913 | -0.28326 | -0.82259 |
| -1.1048499   | -0.90636 | -0.19849 |
| -1.10479619  | -0.09873 | -1.00607 |
| -1.10433666  | -0.29698 | -0.80735 |
| -1.104002666 | -0.05781 | -1.04619 |
| -1.10342959  | -0.15301 | -0.95042 |
| -1.103091835 | -0.01668 | -1.08642 |
| -1.103003692 | -0.21675 | -0.88626 |
| -1.102619373 | -0.41459 | -0.68803 |
| -1.102569734 | -0.77761 | -0.32496 |
| -1.100264123 | -0.58242 | -0.51785 |
| -1.100073892 | -0.17946 | -0.92061 |
| -1.099535674 | -0.12928 | -0.97025 |
| -1.099535674 | -0.32193 | -0.77761 |
| -1.098572794 | -0.373   | -0.72557 |
| -1.097092927 | -0.05842 | -1.03868 |

|              |          |          |
|--------------|----------|----------|
| -1.093109404 | -0.67807 | -0.41504 |
| -1.091000934 | -0.30589 | -0.78512 |
| -1.0908627   | -0.56969 | -0.52118 |
| -1.090459642 | -0.29416 | -0.7963  |
| -1.090017244 | -0.19715 | -0.89287 |
| -1.089267338 | -0.34924 | -0.74003 |
| -1.088225933 | -0.12436 | -0.96387 |
| -1.087462841 | -0.46297 | -0.62449 |
| -1.087462841 | -0.12399 | -0.96347 |
| -1.087462841 | -0.5025  | -0.58496 |
| -1.087462841 | -0.91754 | -0.16993 |
| -1.087462841 | -0.91754 | -0.16993 |
| -1.086587685 | -0.69782 | -0.38877 |
| -1.086228727 | -0.32009 | -0.76614 |
| -1.085729874 | -0.24101 | -0.84472 |
| -1.085210826 | -0.12459 | -0.96062 |
| -1.084888898 | -0.152   | -0.93289 |
| -1.08246216  | -0.58496 | -0.4975  |
| -1.08246216  | -0.41504 | -0.66742 |
| -1.082387251 | -0.7547  | -0.32769 |
| -1.082018889 | -0.04922 | -1.03279 |
| -1.080919995 | -0.2578  | -0.82312 |
| -1.080338407 | -0.17772 | -0.90262 |
| -1.080170349 | -1.12199 | 0.04182  |
| -1.079892801 | -0.11497 | -0.96492 |
| -1.077167861 | -0.43522 | -0.64195 |
| -1.076235586 | -0.57571 | -0.50053 |
| -1.076066658 | -0.17757 | -0.89849 |
| -1.075811136 | -0.31418 | -0.76163 |
| -1.075071295 | -0.00379 | -1.07128 |
| -1.074949411 | -0.1414  | -0.93355 |
| -1.074546953 | -0.13026 | -0.94429 |
| -1.074359254 | -0.76975 | -0.30461 |
| -1.073543236 | -0.56608 | -0.50747 |
| -1.070534257 | -0.33723 | -0.73331 |
| -1.068171503 | -0.16439 | -0.90378 |
| -1.067744607 | -0.38275 | -0.68499 |
| -1.067427928 | -0.26699 | -0.80044 |
| -1.066912406 | -0.17008 | -0.89684 |
| -1.065724182 | -0.18018 | -0.88554 |
| -1.065318338 | -0.56908 | -0.49623 |
| -1.064955442 | -0.43024 | -0.63472 |
| -1.064130337 | -0.13124 | -0.93289 |
| -1.063752421 | -0.22934 | -0.83441 |
| -1.063363786 | -0.0766  | -0.98676 |
| -1.062931256 | -0.43274 | -0.63019 |
| -1.062927039 | -0.04437 | -1.01855 |
| -1.062255374 | -0.36313 | -0.69912 |

|              |          |          |
|--------------|----------|----------|
| -1.061878066 | -0.19184 | -0.87004 |
| -1.059673652 | -0.1537  | -0.90598 |
| -1.058558529 | -0.10251 | -0.95605 |
| -1.058103898 | -0.01689 | -1.04121 |
| -1.058005603 | -0.50043 | -0.55758 |
| -1.055853235 | -0.13887 | -0.91698 |
| -1.055371268 | -0.06015 | -0.99522 |
| -1.054447784 | -0.75489 | -0.29956 |
| -1.053404479 | -0.003   | -1.0504  |
| -1.052980252 | -0.03241 | -1.02057 |
| -1.052723187 | -0.23853 | -0.81419 |
| -1.052665579 | -0.4097  | -0.64297 |
| -1.052259308 | -0.24125 | -0.81101 |
| -1.051761428 | -0.02134 | -1.03042 |
| -1.050626073 | -0.77052 | -0.28011 |
| -1.050040682 | -0.53462 | -0.51542 |
| -1.049652625 | -0.3416  | -0.70805 |
| -1.049313176 | -0.89679 | -0.15252 |
| -1.0482288   | -0.34116 | -0.70707 |
| -1.047305715 | -0.19931 | -0.848   |
| -1.047142983 | -0.07773 | -0.96941 |
| -1.046872733 | -0.50781 | -0.53906 |
| -1.046637711 | -0.12846 | -0.91818 |
| -1.04592471  | -0.18131 | -0.86462 |
| -1.045801363 | -0.20558 | -0.84022 |
| -1.045540784 | -0.37749 | -0.66805 |
| -1.045323991 | -0.08579 | -0.95953 |
| -1.044524615 | -0.00418 | -1.04034 |
| -1.043626932 | -0.03899 | -1.00463 |
| -1.043079011 | -0.36641 | -0.67667 |
| -1.042435266 | -1.10402 | 0.06159  |
| -1.042228235 | -0.32251 | -0.71972 |
| -1.041499363 | -0.42874 | -0.61276 |
| -1.040772516 | -0.10516 | -0.93561 |
| -1.040412134 | -0.18659 | -0.85382 |
| -1.039178844 | -0.24215 | -0.79703 |
| -1.038005372 | -0.58261 | -0.4554  |
| -1.036836768 | -0.59104 | -0.4458  |
| -1.03562391  | -0.89376 | -0.14187 |
| -1.03562391  | -0.40336 | -0.63227 |
| -1.03495877  | -0.32363 | -0.71133 |
| -1.034923742 | -0.1306  | -0.90432 |
| -1.033954906 | -0.08576 | -0.9482  |
| -1.033276155 | -0.45015 | -0.58313 |
| -1.032876156 | -0.63586 | -0.39702 |
| -1.032522994 | -0.16998 | -0.86254 |
| -1.03249102  | -0.35951 | -0.67298 |
| -1.032032349 | -0.07468 | -0.95736 |

|              |          |          |
|--------------|----------|----------|
| -1.031453614 | -0.32614 | -0.70532 |
| -1.030771201 | 0.192732 | -1.2235  |
| -1.030762254 | -0.58496 | -0.4458  |
| -1.028809371 | -0.38679 | -0.64202 |
| -1.028644787 | -0.19616 | -0.83248 |
| -1.028270566 | -0.4219  | -0.60637 |
| -1.027932193 | -0.40807 | -0.61986 |
| -1.027876392 | 0.012934 | -1.04081 |
| -1.027480736 | -0.37037 | -0.65711 |
| -1.026732878 | -0.0012  | -1.02553 |
| -1.026472211 | -0.06711 | -0.95936 |
| -1.026311277 | -0.17292 | -0.8534  |
| -1.026044608 | -0.04975 | -0.97629 |
| -1.023632531 | -0.56503 | -0.45861 |
| -1.023276732 | -0.16182 | -0.86145 |
| -1.021510908 | -0.15534 | -0.86617 |
| -1.019671066 | -0.19364 | -0.82603 |
| -1.019469864 | -0.77816 | -0.24131 |
| -1.018464063 | -0.16784 | -0.85062 |
| -1.018193117 | -0.27392 | -0.74427 |
| -1.018046157 | -0.27456 | -0.74349 |
| -1.017799992 | -0.45893 | -0.55887 |
| -1.016843688 | -0.07729 | -0.93955 |
| -1.014517808 | -0.0278  | -0.98672 |
| -1.014269242 | -0.33728 | -0.67699 |
| -1.014033073 | -0.3409  | -0.67313 |
| -1.012632335 | -0.15207 | -0.86056 |
| -1.011563005 | -0.35575 | -0.65581 |
| -1.011404763 | -0.02804 | -0.98337 |
| -1.0096594   | -0.03621 | -0.97345 |
| -1.008267616 | -0.36375 | -0.64452 |
| -1.006919414 | -0.07073 | -0.93618 |
| -1.005805622 | -0.09582 | -0.90999 |
| -1.005255725 | -0.3351  | -0.67015 |
| -1.003602237 | -0.1239  | -0.87971 |
| -1.002855127 | -0.13005 | -0.87281 |
| -1.000006742 | -0.44685 | -0.55315 |
| -1           | -0.2735  | -0.7265  |
| -1           | -0.05063 | -0.94937 |
| -1           | -0.26303 | -0.73697 |
| -1           | -0.73697 | -0.26303 |
| -1           | -0.32193 | -0.67807 |
| -1           | -0.28758 | -0.71242 |
| -1           | -0.31853 | -0.68147 |
| 1            | 0.693573 | 0.30643  |
| 1            | 0.514573 | 0.48543  |
| 1            | 0.516398 | 0.4836   |
| 1.014743344  | 0.778245 | 0.2365   |



|             |          |          |
|-------------|----------|----------|
| 1.021959253 | 0.751934 | 0.27003  |
| 1.025750056 | 0.975794 | 0.04996  |
| 1.049105472 | 0.433286 | 0.61582  |
| 1.054447784 | 0.401098 | 0.65335  |
| 1.065643937 | 0.674907 | 0.39074  |
| 1.066769012 | 0.687532 | 0.37924  |
| 1.086414752 | 0.671377 | 0.41504  |
| 1.103537604 | 0.71097  | 0.39257  |
| 1.106915204 | 0.691878 | 0.41504  |
| 1.114267511 | 0.855525 | 0.25874  |
| 1.115477217 | 0.938599 | 0.17688  |
| 1.117716576 | 0.318419 | 0.7993   |
| 1.118897847 | 0.691712 | 0.42719  |
| 1.129829596 | 0.435225 | 0.6946   |
| 1.135916109 | 0.600393 | 0.53552  |
| 1.141832694 | 1.266012 | -0.12418 |
| 1.157541277 | 0.428843 | 0.7287   |
| 1.158697746 | 1.049469 | 0.10923  |
| 1.172180975 | 1.259644 | -0.08746 |
| 1.182857341 | 0.010736 | 1.17212  |
| 1.184424571 | 1        | 0.18442  |
| 1.193826872 | 0.007547 | 1.18628  |
| 1.21649182  | 0.900464 | 0.31603  |
| 1.216695691 | 1.151008 | 0.06569  |
| 1.237039197 | 0.440573 | 0.79647  |
| 1.24725301  | 0.992614 | 0.25464  |
| 1.247927513 | 0.369234 | 0.87869  |
| 1.265030714 | 1.225502 | 0.03953  |
| 1.27478244  | 0.257923 | 1.01686  |
| 1.285203493 | 0.669562 | 0.61564  |
| 1.288810867 | 0.365867 | 0.92294  |
| 1.303011195 | 0.445676 | 0.85734  |
| 1.310340121 | 0.782409 | 0.52793  |
| 1.311006546 | 0.948791 | 0.36222  |
| 1.316857105 | 0.316857 | 1        |
| 1.319329424 | 0.974461 | 0.34487  |
| 1.321928095 | 1.169925 | 0.152    |
| 1.321928095 | 0.584963 | 0.73697  |
| 1.32483969  | 1.152003 | 0.17284  |
| 1.332434361 | 0.70498  | 0.62745  |
| 1.334419039 | 0.383329 | 0.95109  |
| 1.338858491 | 1.081583 | 0.25728  |
| 1.343407822 | 0.053111 | 1.2903   |
| 1.358616492 | 0.892177 | 0.46644  |
| 1.359167495 | 0.685064 | 0.6741   |
| 1.378511623 | 1        | 0.37851  |
| 1.381870635 | 0.59946  | 0.78241  |
| 1.387023123 | 0.509014 | 0.87801  |

|             |          |         |
|-------------|----------|---------|
| 1.389543268 | 0.98276  | 0.40678 |
| 1.396517411 | 0.78617  | 0.61035 |
| 1.396890153 | 0.552541 | 0.84435 |
| 1.40297835  | 0.993472 | 0.40951 |
| 1.415037499 | 1.353637 | 0.0614  |
| 1.416041812 | 0.664445 | 0.7516  |
| 1.418916459 | 0.756366 | 0.66255 |
| 1.431805713 | 0.793948 | 0.63786 |
| 1.437405312 | 0.681824 | 0.75558 |
| 1.440572591 | 1.280108 | 0.16046 |
| 1.440703164 | 1.137729 | 0.30297 |
| 1.449231868 | 0.332575 | 1.11666 |
| 1.453640339 | 1.144157 | 0.30948 |
| 1.459431619 | 1.169925 | 0.28951 |
| 1.467143295 | 1.241507 | 0.22564 |
| 1.473931188 | 1.353637 | 0.12029 |
| 1.49696602  | 1.478704 | 0.01826 |
| 1.499926397 | 0.805272 | 0.69465 |
| 1.518473921 | 0.790304 | 0.72817 |
| 1.519374159 | 0.552541 | 0.96683 |
| 1.524336142 | 0.726239 | 0.7981  |
| 1.542527234 | 0.724366 | 0.81816 |
| 1.56331675  | 0.404419 | 1.1589  |
| 1.568842835 | 1.047306 | 0.52154 |
| 1.57053543  | 1.518873 | 0.05166 |
| 1.584962501 | 1        | 0.58496 |
| 1.584962501 | 0.678072 | 0.90689 |
| 1.587108411 | 0.610646 | 0.97646 |
| 1.614709844 | 1.044394 | 0.57032 |
| 1.628031223 | 0.862496 | 0.76553 |
| 1.632445659 | 0.921694 | 0.71075 |
| 1.639408435 | 0.924049 | 0.71536 |
| 1.658763801 | 0.519745 | 1.13902 |
| 1.711202498 | 1.384392 | 0.32681 |
| 1.736965594 | 0.645335 | 1.09163 |
| 1.743224585 | 0.383329 | 1.3599  |
| 1.759408644 | 0.652632 | 1.10678 |
| 1.777607579 | 1.192645 | 0.58496 |
| 1.797956224 | 0.250227 | 1.54773 |
| 1.799087306 | 0.485427 | 1.31366 |
| 1.820676301 | 0.527629 | 1.29305 |
| 1.836057632 | 0.640111 | 1.19595 |
| 1.836711176 | 0.818981 | 1.01773 |
| 1.843900687 | 0.807196 | 1.0367  |
| 1.855300386 | 1.689354 | 0.16595 |
| 1.864721141 | 1.159996 | 0.70473 |
| 1.892602209 | 1.268252 | 0.62435 |
| 1.921487972 | 1.59309  | 0.3284  |

|             |          |         |
|-------------|----------|---------|
| 1.931544698 | 0.529973 | 1.40157 |
| 1.937909995 | 0.36257  | 1.57534 |
| 1.955177802 | 1.204894 | 0.75028 |
| 2           | 1.378512 | 0.62149 |
| 2           | 1.765535 | 0.23447 |
| 2.048094288 | 0.775568 | 1.27253 |
| 2.070389328 | 1.847997 | 0.22239 |
| 2.103622631 | 1.364274 | 0.73935 |
| 2.122571458 | 0.715023 | 1.40755 |
| 2.136538833 | 1.428237 | 0.7083  |
| 2.145980128 | 1.060169 | 1.08581 |
| 2.157541277 | 1.657112 | 0.50043 |
| 2.158697746 | 1.84986  | 0.30884 |
| 2.162271429 | 1.36257  | 0.7997  |
| 2.169925001 | 1.415037 | 0.75489 |
| 2.187627003 | 0.415037 | 1.77259 |
| 2.215728691 | 1.090198 | 1.12553 |
| 2.263034406 | 1.378512 | 0.88452 |
| 2.263034406 | 1.678072 | 0.58496 |
| 2.311201688 | 0.152003 | 2.1592  |
| 2.321928095 | 1.415037 | 0.90689 |
| 2.358453971 | 1.462791 | 0.89566 |
| 2.362570079 | 1.36257  | 1       |
| 2.399930607 | 2.222392 | 0.17754 |
| 2.401468222 | 2.223227 | 0.17824 |
| 2.402098444 | 1.478047 | 0.92405 |
| 2.415617051 | 0.509087 | 1.90653 |
| 2.480625841 | 1.886618 | 0.59401 |
| 2.584962501 | 0.584963 | 2       |
| 2.590416931 | 1.453458 | 1.13696 |
| 2.658211483 | 2.209453 | 0.44876 |
| 2.700439718 | 1.736966 | 0.96347 |
| 2.790076931 | 2.584963 | 0.20511 |
| 2.807354922 | 2.398549 | 0.40881 |
| 2.960912644 | 1.846988 | 1.11392 |
| 3.119888091 | 0.958421 | 2.16147 |
| 3.313183638 | 1.422944 | 1.89024 |
| 3.392317423 | 2        | 1.39232 |
| 3.415037499 | 2.029747 | 1.38529 |
| 3.459431619 | 2.584963 | 0.87447 |
| 3.557128293 | 2.926966 | 0.63016 |
| 3.563704969 | 1.823621 | 1.74008 |
| 3.584962501 | 1.584963 | 2       |
| 3.586368337 | 1.122336 | 2.46403 |
| 3.659509454 | 3.06413  | 0.59538 |
| 3.947166553 | 2.801697 | 1.14547 |
| 3.987060944 | 1.652077 | 2.33498 |
| 4.357634869 | 3.843472 | 0.51416 |

|             |          |         |
|-------------|----------|---------|
| 4.754887502 | 1.672425 | 3.08246 |
|-------------|----------|---------|

|             |          |         |
|-------------|----------|---------|
| 5.594946589 | 3.724893 | 1.87005 |
|-------------|----------|---------|

|       |          |       |
|-------|----------|-------|
| #NUM! | -3.24793 | #NUM! |
|-------|----------|-------|

|       |          |       |
|-------|----------|-------|
| #NUM! | -0.20645 | #NUM! |
|-------|----------|-------|

|       |          |       |
|-------|----------|-------|
| #NUM! | -2.73697 | #NUM! |
|-------|----------|-------|

|       |          |       |
|-------|----------|-------|
| #NUM! | -0.63743 | #NUM! |
|-------|----------|-------|

|       |          |       |
|-------|----------|-------|
| #NUM! | -1.45943 | #NUM! |
|-------|----------|-------|

| Transcript_id | Gene description                                                               |
|---------------|--------------------------------------------------------------------------------|
| ENSGALT00     | gastrulation brain homeobox 2                                                  |
| ENSGALT00     | Zic family member 1                                                            |
| ENSGALT00     | neurogenic differentiation 1                                                   |
| ENSGALT00     | transcription factor EC                                                        |
| ENSGALT00     | NeuroM protein                                                                 |
| ENSGALT00     | SKI family transcriptional corepressor 1                                       |
| ENSGALT00     | mesenchyme homeobox 2                                                          |
| ENSGALT00     | nescient helix loop helix 1                                                    |
| ENSGALT00     | PR domain containing 14                                                        |
| ENSGALT00     | T-cell leukemia homeobox 3                                                     |
| ENSGALT00     | suppression of tumorigenicity 18 (breast carcinoma) (zinc finger protein)      |
| ENSGALT00     | kelch repeat and BTB (POZ) domain containing 5                                 |
| ENSGALT00     | regulatory factor X, 4 (influences HLA class II expression)                    |
| ENSGALT00     | zinc finger protein, multitype 2                                               |
| ENSGALT00     | H6 family homeobox 1                                                           |
| ENSGALT00     | Zic family member 5                                                            |
| ENSGALT00     | tripartite motif containing 29                                                 |
| ENSGALT00     | T-box 22                                                                       |
| ENSGALT00     | forkhead box protein L1-like                                                   |
| ENSGALT00     | doublesex and mab-3 related transcription factor 1                             |
| ENSGALT00     | four and a half LIM domains 2                                                  |
| ENSGALT00     | forkhead box E3                                                                |
| ENSGALT00     | paired-like homeodomain 3                                                      |
| ENSGALT00     | ectodermal-neural cortex 1 (with BTB-like domain)                              |
| ENSGALT00     | early B-cell factor 2                                                          |
| ENSGALT00     | teashirt zinc finger homeobox 2                                                |
| ENSGALT00     | transcription factor AP-2 alpha (activating enhancer binding protein 2 alpha)  |
| ENSGALT00     | endothelial PAS domain protein 1                                               |
| ENSGALT00     | POU class 2 homeobox 3                                                         |
| ENSGALT00     | runt-related transcription factor 1; translocated to, 1 (cyclin D-related)     |
| ENSGALT00     | Zic family member 3 heterotaxy 1 (odd-paired homolog, Drosophila)              |
| ENSGALT00     | Cbp/p300-interacting transactivator, with Glu/Asp-rich carboxy-terminal domain |
| ENSGALT00     | D4, zinc and double PHD fingers, family 3                                      |
| ENSGALT00     | sensory organ homeobox protein SOHo                                            |
| ENSGALT00     | zinc finger protein 750                                                        |
| ENSGALT00     | growth regulation by estrogen in breast cancer 1                               |
| ENSGALT00     | Forkhead box protein D3                                                        |
| ENSGALT00     | forkhead box L2                                                                |
| ENSGALT00     | SRY (sex determining region Y)-box 7                                           |
| ENSGALT00     | ALX homeobox 4                                                                 |
| ENSGALT00     | POU class 6 homeobox 2                                                         |
| ENSGALT00     | Brain-specific homeobox/POU domain protein 3                                   |
| ENSGALT00     | vestigial like 3 (Drosophila)                                                  |
| ENSGALT00     | interferon regulatory factor 1                                                 |
| ENSGALT00     | zinc finger E-box binding homeobox 2                                           |

ENSGALT00 basonuclin 2  
ENSGALT00 Meis homeobox 2  
ENSGALT00 homeobox A3  
ENSGALT00 retinoid X receptor, gamma  
ENSGALT00 T-box 4  
ENSGALT00 activating transcription factor 3  
ENSGALT00 hairy and enhancer of split 5 (Drosophila)  
ENSGALT00 BARX homeobox 2  
ENSGALT00 LIM homeobox 1  
ENSGALT00 hairy and enhancer of split 5-like  
ENSGALT00 Kruppel-like factor 7 (ubiquitous)  
ENSGALT00 zinc finger protein 366  
ENSGALT00 zinc finger protein 503  
ENSGALT00 forkhead box C2 (MFH-1, mesenchyme forkhead 1)  
ENSGALT00 \N  
ENSGALT00 spleen focus forming virus (SFFV) proviral integration oncogene spi1  
ENSGALT00 IKAROS family zinc finger 1 (Ikaros)  
ENSGALT00 T-box 2  
ENSGALT00 forkhead box N4  
ENSGALT00 forkhead box S1  
ENSGALT00 Kruppel-like factor 1 (erythroid)  
ENSGALT00 Friend leukemia virus integration 1  
ENSGALT00 zinc finger E-box binding homeobox 1  
ENSGALT00 TNF receptor-associated factor 4  
ENSGALT00 LIM domain only 2 (rhombotin-like 1)  
ENSGALT00 dachshund homolog 2 (Drosophila)  
ENSGALT00 retinoic acid receptor, beta  
ENSGALT00 T-box, brain, 1  
ENSGALT00 nuclear receptor subfamily 4, group A, member 3  
ENSGALT00 kelch-like 4 (Drosophila)  
ENSGALT00 hematopoietically expressed homeobox  
ENSGALT00 nuclear factor of kappa light polypeptide gene enhancer in B-cells inhibitor, e|  
ENSGALT00 nuclear receptor subfamily 2, group E, member 1  
ENSGALT00 ELK3, ETS-domain protein (SRF accessory protein 2)  
ENSGALT00 tripartite motif containing 66  
ENSGALT00 ventral anterior homeobox 1  
ENSGALT00 interferon regulatory factor 10  
ENSGALT00 chromobox homolog 4 (Pc class homolog, Drosophila)  
ENSGALT00 small nuclear ribonucleoprotein polypeptides B and B1  
ENSGALT00 \N  
ENSGALT00 BRCA1 interacting protein C-terminal helicase 1  
ENSGALT00 family with sequence similarity 171, member B  
ENSGALT00 upstream stimulatory factor 1  
ENSGALT00 transcription factor CP2-like 1  
ENSGALT00 zinc finger, HIT-type containing 3  
ENSGALT00 ets variant 1

ENSGALT00 four and a half LIM domains 3  
ENSGALT00 solute carrier family 22 (organic cation transporter), member 4  
ENSGALT00 LIM domain only 4  
ENSGALT00 heat shock transcription factor 4  
ENSGALT00 cellular repressor of E1A-stimulated genes 1  
ENSGALT00 paired related homeobox 1  
ENSGALT00 prospero-related homeobox 1  
ENSGALT00 sterile alpha motif domain containing 7  
ENSGALT00 T-box 15  
ENSGALT00 androgen receptor  
ENSGALT00 nuclear receptor subfamily 2, group E, member 3  
ENSGALT00 lymphoid transcription factor  
ENSGALT00 runt-related transcription factor 2  
ENSGALT00 FOS-like antigen 2  
ENSGALT00 E74-like factor 5 (ets domain transcription factor)  
ENSGALT00 doublesex and mab-3 related transcription factor 3  
ENSGALT00 Retinal homeobox protein Rx1  
ENSGALT00 tubby like protein 1  
ENSGALT00 SRY (sex determining region Y)-box 14  
ENSGALT00 zinc finger protein 488  
ENSGALT00 goosecoid homeobox 2

| Gene symbol | Function? | Distal  | Mid     | Prox    | Log2(Distal v | Log2(Mid vs. |
|-------------|-----------|---------|---------|---------|---------------|--------------|
| GBX2        | TF        | 21.2348 | 97.008  | 775.499 | -5.1906225    | -2.9989493   |
| ZIC1        | TF        | 126.369 | 592.586 | 2059.17 | -4.0263484    | -1.7969665   |
| NEUROD1     | TF        | 259.5   | 1711    | 2709.5  | -3.3842202    | -0.6631869   |
| TFEC        | TF        | 0.5     | 2.5     | 5       | -3.3219281    | -1           |
| NEUROD4     | TF        | 43.5    | 275.5   | 418.5   | -3.2661403    | -0.6031753   |
| SKOR1       | TF        | 15.5    | 17.5    | 144.5   | -3.2207294    | -3.0456427   |
| MEOX2       | TF        | 74      | 257     | 643.999 | -3.1214613    | -1.3252901   |
| NHLH1       | TF        | 99.9999 | 469     | 740.499 | -2.8884992    | -0.6589099   |
| PRDM14      | TF        | 2.5     | 11.5    | 18.5    | -2.8875253    | -0.6858914   |
| TLX3        | TF        | 14.5    | 27.5    | 102     | -2.8144443    | -1.8910656   |
| ST18        | TF        | 85.5    | 498.5   | 590.5   | -2.7879407    | -0.2443436   |
| KBTBD5      | TF        | 30      | 158.5   | 202.5   | -2.7548875    | -0.3534391   |
| RFX4        | TF        | 1       | 2       | 6.5     | -2.7004397    | -1.7004397   |
| ZFPM2       | TF        | 143.5   | 620.5   | 790     | -2.4608019    | -0.3484214   |
| HMX1        | TF        | 60.9955 | 187.941 | 319.584 | -2.3894205    | -0.7659154   |
| ZIC5        | TF        | 31.6307 | 40.4107 | 159.83  | -2.3371408    | -1.983729    |
| TRIM29      | TF        | 3       | 7       | 15      | -2.3219281    | -1.0995357   |
| TBX22       | TF        | 5       | 10      | 24      | -2.2630344    | -1.2630344   |
| LOC427656   | TF        | 4       | 9       | 19      | -2.2479275    | -1.0780025   |
| DMRT1       | TF        | 11      | 36      | 52      | -2.2410081    | -0.5305147   |
| FHL2        | TF        | 149.5   | 514.5   | 704     | -2.2354299    | -0.4524044   |
| FOXE3       | TF        | 2.50842 | 3.00509 | 11.7346 | -2.2259178    | -1.9652886   |
| PITX3       | TF        | 2.5     | 9       | 11.5    | -2.2016339    | -0.353637    |
| ENC1        | TF        | 462     | 1318.5  | 2053    | -2.1517689    | -0.6388361   |
| EBF2        | TF        | 50      | 94.5    | 221     | -2.1440464    | -1.2256601   |
| TSHZ2       | TF        | 122     | 226.5   | 533.5   | -2.1286071    | -1.2359772   |
| TFAP2A      | TF        | 136     | 494.5   | 568.5   | -2.0635537    | -0.2011898   |
| EPAS1       | TF        | 458     | 1015    | 1857.5  | -2.0199427    | -0.8718825   |
| POU2F3      | TF        | 1.5     | 3.5     | 6       | -2            | -0.7776076   |
| RUNX1T1     | TF        | 296     | 801.494 | 1167.52 | -1.9797782    | -0.5426836   |
| ZIC3        | TF        | 24.5    | 46      | 93.5    | -1.9321846    | -1.0233325   |
| CITED4      | TF        | 348     | 1071.5  | 1285.98 | -1.885709     | -0.2632364   |
| DPF3        | TF        | 82.5    | 289     | 303.5   | -1.8792305    | -0.070627    |
| SOHO-1      | TF        | 323.489 | 798.12  | 1158.4  | -1.8403449    | -0.5374559   |
| ZNF750      | TF        | 2       | 5       | 7       | -1.8073549    | -0.4854268   |
| GREB1       | TF        | 157     | 340.5   | 549     | -1.8060416    | -0.6891514   |
| FOXD3       | TF        | 228.902 | 739.369 | 795.88  | -1.7978209    | -0.1062564   |
| FOXL2       | TF        | 13      | 44.5    | 44.5    | -1.7752937    | 0            |
| SOX7        | TF        | 39.5763 | 97.5549 | 134.085 | -1.7604392    | -0.4588616   |
| ALX4        | TF        | 10.5    | 13      | 35      | -1.7369656    | -1.4288433   |
| POU6F2      | TF        | 35.5    | 104     | 118     | -1.7328959    | -0.1822033   |
| POU4F3      | TF        | 380     | 544.732 | 1256.44 | -1.7252705    | -1.2057233   |
| VGLL3       | TF        | 59      | 123.5   | 194.5   | -1.7209833    | -0.6552591   |
| IRF1        | TF        | 6       | 13      | 19.5    | -1.7004397    | -0.5849625   |
| ZEB2        | TF        | 968     | 2510    | 3110.5  | -1.6840676    | -0.3094591   |



|           |    |         |         |         |            |            |
|-----------|----|---------|---------|---------|------------|------------|
| BNC2      | TF | 48.5    | 73.5    | 154.5   | -1.6715502 | -1.0717907 |
| MEIS2     | TF | 82.0803 | 102.037 | 260.5   | -1.6661755 | -1.352191  |
| HOXA3     | TF | 3.5     | 10      | 11      | -1.6520767 | -0.1375035 |
| RXRG      | TF | 385.218 | 1018.24 | 1209.23 | -1.6503417 | -0.248011  |
| TBX4      | TF | 4       | 7       | 12.5    | -1.6438562 | -0.8365013 |
| ATF3      | TF | 15      | 37      | 45.5    | -1.600904  | -0.2983413 |
| HES5      | TF | 237.675 | 443.824 | 720.724 | -1.6004567 | -0.6994592 |
| BARX2     | TF | 87.5    | 265.5   | 262     | -1.5822119 | 0.01914505 |
| LHX1      | TF | 11.5    | 25.5    | 33.5    | -1.5425272 | -0.3936638 |
| LOC419390 | TF | 262.112 | 429.44  | 754.639 | -1.5256033 | -0.8133301 |
| KLF7      | TF | 100     | 226.501 | 278.499 | -1.4776721 | -0.2981547 |
| ZNF366    | TF | 15.5    | 26      | 42      | -1.4381211 | -0.6918777 |
| ZNF503    | TF | 305.631 | 718.124 | 825.456 | -1.4334004 | -0.2009583 |
| FOXC2     | TF | 774.453 | 1518.13 | 2039.35 | -1.3968598 | -0.4258141 |
| SOX18     | TF | 69.5    | 133.5   | 178.5   | -1.3608392 | -0.4190843 |
| SPI1      | TF | 26      | 39      | 66.5    | -1.3548427 | -0.7698802 |
| IKZF1     | TF | 10      | 17.5    | 25.5    | -1.3504972 | -0.5431423 |
| TBX2      | TF | 656.496 | 985.005 | 1668.5  | -1.3456936 | -0.7603487 |
| FOXN4     | TF | 29      | 42.8617 | 73.3489 | -1.3387224 | -0.7750863 |
| FOXS1     | TF | 65.6825 | 162.995 | 165.298 | -1.3314883 | -0.0202416 |
| KLF1      | TF | 36.5    | 59      | 88      | -1.2696071 | -0.5767886 |
| FLI1      | TF | 231.5   | 375.5   | 556.001 | -1.2640753 | -0.5662746 |
| ZEB1      | TF | 623.5   | 1418.5  | 1487    | -1.2539432 | -0.0680385 |
| TRAF4     | TF | 492     | 944.5   | 1143.5  | -1.2167261 | -0.2758337 |
| LMO2      | TF | 314     | 697.5   | 721     | -1.1992347 | -0.047806  |
| DACH2     | TF | 365     | 464.5   | 833     | -1.19042   | -0.8426379 |
| RARB      | TF | 670     | 1023.5  | 1508.49 | -1.1708721 | -0.559594  |
| TBR1      | TF | 4       | 4.5     | 9       | -1.169925  | -1         |
| NR4A3     | TF | 117.5   | 203.767 | 263     | -1.162402  | -0.3681424 |
| KLHL4     | TF | 109     | 178     | 242.5   | -1.1536566 | -0.4461075 |
| HHEX      | TF | 47      | 80      | 104     | -1.1458509 | -0.3785116 |
| NFKBIE    | TF | 184.5   | 380.5   | 406.5   | -1.1396345 | -0.0953589 |
| NR2E1     | TF | 2.5     | 4       | 5.5     | -1.1375035 | -0.4594316 |
| ELK3      | TF | 1852    | 2720    | 4067    | -1.1348809 | -0.5803583 |
| TRIM66    | TF | 112     | 167     | 245     | -1.129283  | -0.5529336 |
| VAX1      | TF | 6       | 12.5    | 13      | -1.1154772 | -0.0565835 |
| IRF10     | TF | 67.5    | 139.5   | 145.5   | -1.1080597 | -0.060754  |
| CBX4      | TF | 138.5   | 256     | 297.5   | -1.1030037 | -0.2167459 |
| SNRNPB    | TF | 5366    | 9126    | 11393   | -1.0862287 | -0.3200931 |
| TAL1      | TF | 16.5    | 31.5    | 35      | -1.0848889 | -0.1520031 |
| BRIP1     | TF | 450.998 | 566.004 | 955.005 | -1.0823873 | -0.754696  |
| FAM171B   | TF | 859     | 1757.5  | 1818.5  | -1.0820189 | -0.0492242 |
| USF1      | TF | 2317.96 | 4702.5  | 4809.33 | -1.0529803 | -0.032408  |
| TFCP2L1   | TF | 62.0001 | 111     | 128     | -1.0458014 | -0.2055841 |
| ZNHIT3    | TF | 767.5   | 1468    | 1579    | -1.0407725 | -0.1051592 |
| ETV1      | TF | 1123.5  | 1540.5  | 2306.98 | -1.0380054 | -0.5826068 |

|         |    |         |         |         |            |            |
|---------|----|---------|---------|---------|------------|------------|
| FHL3    | TF | 691.5   | 1102.5  | 1414.5  | -1.032491  | -0.3595135 |
| SLC22A4 | TF | 12.648  | 25.7477 | 25.7691 | -1.0267329 | -0.0011986 |
| LMO4    | TF | 4498    | 7974.04 | 9119.5  | -1.0196711 | -0.1936439 |
| HSF4    | TF | 5       | 6       | 10      | -1         | -0.7369656 |
| CREG1   | TF | 775.495 | 591.501 | 370.5   | 1.06564394 | 0.67490707 |
| PRRX1   | TF | 714.962 | 531.725 | 329.201 | 1.11889785 | 0.69171158 |
| PROX1   | TF | 1743    | 1356    | 702.498 | 1.31100655 | 0.94879116 |
| SAMD7   | TF | 5       | 4.5     | 2       | 1.32192809 | 1.169925   |
| TBX15   | TF | 129     | 74.9999 | 49.5    | 1.38187064 | 0.59946015 |
| AR      | TF | 1171.5  | 882     | 443     | 1.40297835 | 0.99347196 |
| NR2E3   | TF | 238.5   | 235.5   | 84.5    | 1.49696602 | 1.47870381 |
| IKZF3   | TF | 73.0544 | 44.1007 | 25.5    | 1.51847392 | 0.79030431 |
| RUNX2   | TF | 43      | 22      | 15      | 1.51937416 | 0.55254102 |
| FOSL2   | TF | 65      | 30.5    | 19.5    | 1.73696559 | 0.64533512 |
| ELF5    | TF | 1378.5  | 819.5   | 355.5   | 1.9551778  | 1.20489439 |
| DMRT3   | TF | 10      | 8.5     | 2.5     | 2          | 1.76553475 |
| RAX     | TF | 101     | 60.5    | 23.5    | 2.10362263 | 1.36427439 |
| TULP1   | TF | 12      | 8       | 2.5     | 2.26303441 | 1.67807191 |
| SOX14   | TF | 41.5    | 36      | 6       | 2.79007693 | 2.5849625  |
| ZNF488  | TF | 38.5    | 29      | 5.5     | 2.80735492 | 2.39854938 |
| GSC2    | TF | 55.5    | 11      | 3.5     | 3.98706094 | 1.6520767  |

Log2(Distal vs. Mid)

-2.1916732

-2.2293819

-2.7210333

-2.3219281

-2.662965

-0.1750867

-1.7961712

-2.2295894

-2.2016339

-0.9233787

-2.5435972

-2.4014484

-1

-2.1123805

-1.6235051

-0.3534119

-1.2223924

-1

-1.169925

-1.7104934

-1.7830256

-0.2606293

-1.8479969

-1.5129328

-0.9183862

-0.8926299

-1.8623639

-1.1480602

-1.2223924

-1.4370945

-0.9088521

-1.6224726

-1.8086035

-1.302889

-1.3219281

-1.1168902

-1.6915645

-1.7752937

-1.3015776

-0.3081223

-1.5506926

-0.5195472

-1.0657242

-1.1154772

-1.3746084

-0.5997595  
-0.3139845  
-1.5145732  
-1.4023306  
-0.8073549  
-1.3025628  
-0.9009975  
-1.6013569  
-1.1488634  
-0.7122732  
-1.1795174  
-0.7462434  
-1.2324421  
-0.9710457  
-0.9417549  
-0.5849625  
-0.8073549  
-0.5853448  
-0.5636362  
-1.3112468  
-0.6928185  
-0.6978007  
-1.1859047  
-0.9408925  
-1.1514287  
-0.3477821  
-0.6112781  
-0.169925  
-0.7942597  
-0.7075491  
-0.7673392  
-1.0442756  
-0.6780719  
-0.5545226  
-0.5763494  
-1.0588937  
-1.0473057  
-0.8862578  
-0.7661356  
-0.9328858  
-0.3276912  
-1.0327947  
-1.0205723  
-0.8402172  
-0.9356133  
-0.4553986

-0.6729775  
-1.0255343  
-0.8260272  
-0.2630344  
0.3907369  
0.4271863  
0.3622154  
0.1520031  
0.7824105  
0.4095064  
0.0182622  
0.7281696  
0.9668331  
1.0916305  
0.7502834  
0.2344653  
0.7393482  
0.5849625  
0.2051144  
0.4088055  
2.3349842
